# Supplementary material
Source: PubMed Central journal article supplement (PMC3474685)
Supplement: psb-7-918-s01.pdf [file psb-7-918-s01.pdf]

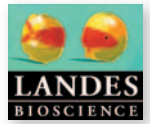

## **Supplemental Material to:**

**Said Hafidh, Katarína Breznenová and David Honys**

**De novo post-pollen mitosis II tobacco pollen tube  
transcriptome**

**Plant Signaling & Behavior 2012; 7(8)**

**<http://dx.doi.org/10.4161/psb.20745>**

**<http://www.landesbioscience.com/journals/psb/article/20745/>**

**Supplementary figure S1.**

Expression profiles of the closest *Nicotiana tabacum* homologs of SIV-enriched Arabidopsis genes.<sup>8</sup>

dChip normalized expression levels

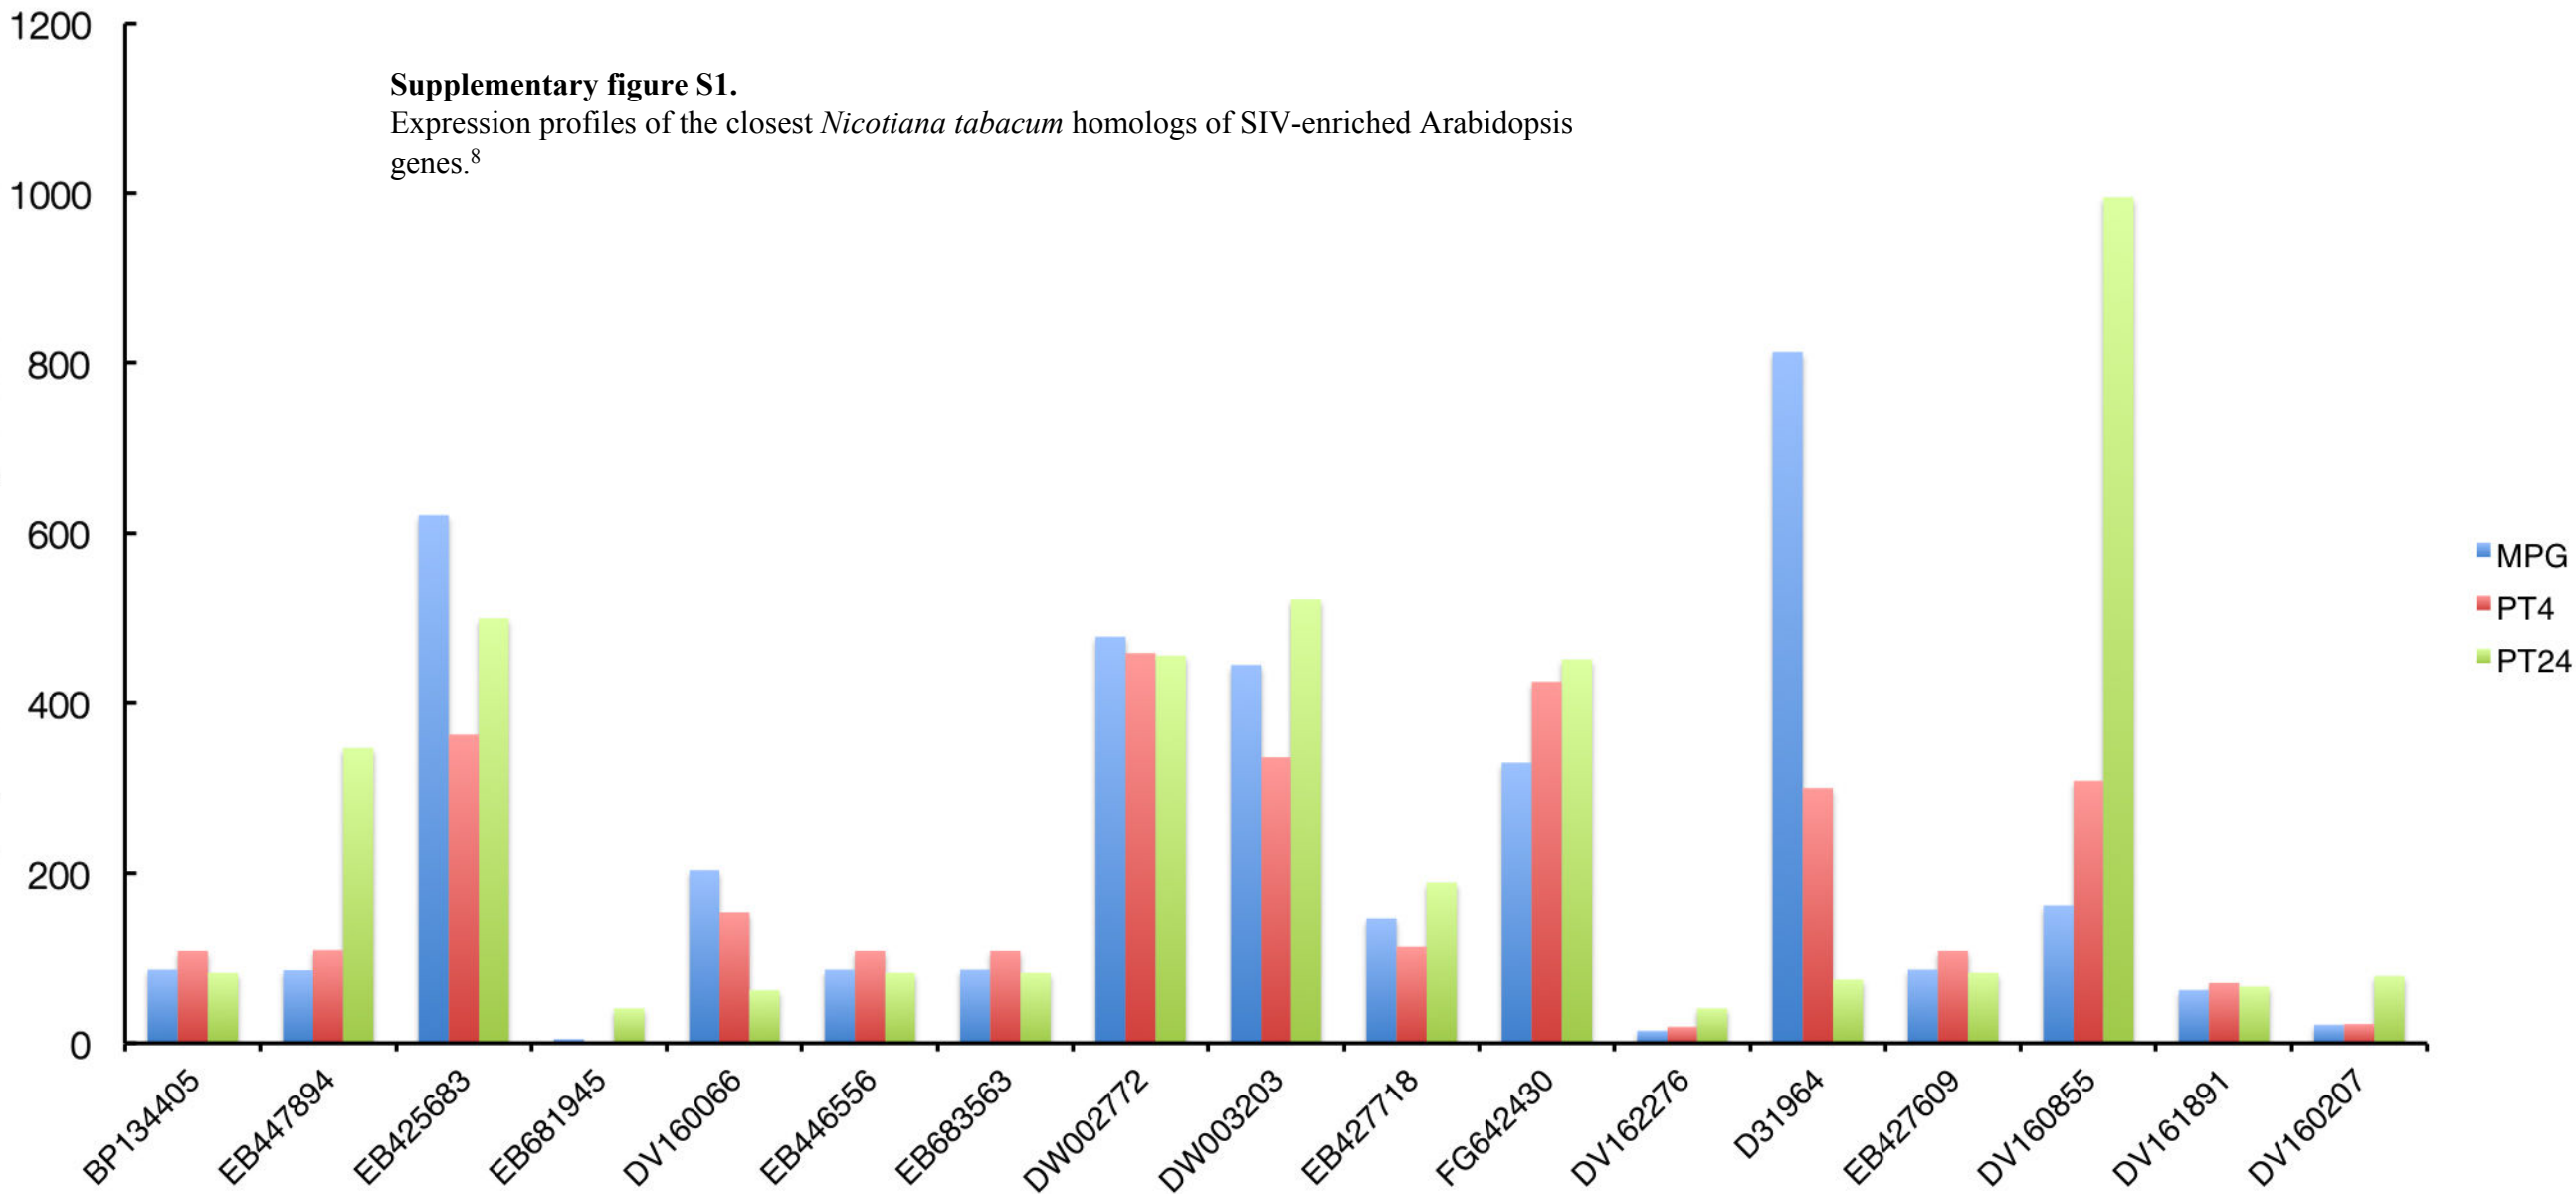



### Supplementary Table S1.

Mean normalized expression of tobacco PT24-expressed probe sets with associated detection calls computed from two biological replicates with expression levels "well above background".

| Line | Row | Col | Start | Sequence                                                     | ProbeUID | ProbeName    | GeneName     |
|------|-----|-----|-------|--------------------------------------------------------------|----------|--------------|--------------|
| 12   | 1   | 12  | 697   | TTTTGGATATGTTGCGACATTTGTGAAATGTGGTTTCATGGCAAGTGTGTGAAGATC/   | 3        | A_95_P225077 | EB681313     |
| 13   | 1   | 13  | 258   | TTGCTCTGGAACCTATAAAGTTGATAGTATCAATAGCATGTGATAAGCATTTGAAT     | 5        | A_95_P129702 | EB429667     |
| 15   | 1   | 15  | 507   | GAGATTATAGATCAAGGTCACCGTAAGATCCCGTCGTTATTCAGGCTATGAAGATG     | 9        | A_95_P026506 | TA19895_4097 |
| 20   | 1   | 20  | 381   | ATCATCGCTAATATAGGTTCAAAATCTTTCTGTTCAAGGCTTTAAACAACGCAACAGTT( | 19       | A_95_P005006 | EH666078     |
| 21   | 1   | 21  | 485   | TCCTTGAATTGTATGGAATTTTATGTGCAAGAATGTCAGCATTTTCGGCTGTTATAGTT  | 21       | A_95_P124072 | DW003919     |
| 22   | 1   | 22  | 742   | TTGAGACCAGCTTTCCTCTCTTGACTTCGTTTATGATGTTGAATCCCATTTCATTGCT(  | 23       | A_95_P025461 | EB440074     |
| 25   | 1   | 25  | 827   | GGGAAAGAAAAGGCTGCTATGATCTGGATGTTCCCTAGAACAAAGTAATGAATTA(     | 29       | A_95_P014051 | EB450974     |
| 33   | 1   | 33  | 486   | ATTGCATTGAGGATCATTAGGGTAGTTTCTGACAGTATTCTATCCAGTTTGATATTCT(  | 45       | A_95_P024291 | DW001674     |
| 34   | 1   | 34  | 839   | GCCCTGGTGTGCAAACCTTTTTGAACTGATGATGATGAAAATATTTGTTGCTCCTTT(   | 47       | A_95_P126092 | EB425321     |
| 35   | 1   | 35  | 678   | AGTGATAGACAAAGCAGAAGTGGTACAAGTCAGATGCAAGCAATGCTCTAGTTTCT     | 49       | A_95_P272641 | EB451681     |
| 47   | 1   | 47  | 396   | GGAAATGTTGGAGCGGGTACAGAATCAACAACGCTACAAGCGAATGGATGCTTGT.     | 73       | A_95_P283178 | AM817961     |
| 48   | 1   | 48  | 753   | GTCTTATTTCTTGACAATGGACAATGAAGTTATGCTTGTTCAGCGAATGTTACAAC     | 75       | A_95_P014466 | DW000079     |
| 52   | 1   | 52  | 174   | TACCAGTCAGCTCGTACTGTAATTTCCCAAAAAATGTAAGAGAAATTATCTTTCTTTC   | 83       | A_95_P222367 | TA22018_4097 |
| 53   | 1   | 53  | 568   | GGAGTTATATCAATATCATCACCAAACCTTCATATGGTACAGTATTCTCCTATCTTTC   | 85       | A_95_P043826 | BP130717     |
| 56   | 1   | 56  | 588   | ATTTGTGACTAGTTTGAATTTAGGGAGCATTGGCATCTCAAACCTTTATGTTTGCTC    | 91       | A_95_P125232 | DW005032     |
| 58   | 1   | 58  | 841   | CAGAAAAGCTGTAGAAAAGAAGCATCGGGGAAAACCTGGAAAATATGCACTGCTATC    | 95       | A_95_P000936 | EB425859     |
| 59   | 1   | 59  | 1320  | TCCTCCTGAGGTATGTCACAGGATTTGGCTAATAAAAGCTTGAGAAAACCTCGTCTTTG  | 97       | A_95_P177682 | TA12046_4097 |
| 62   | 1   | 62  | 403   | GGTGCCAAATGATGGACCCTCTGGTCTCTTCTTTATAGAAAGGAGGTCACCTCTTTT    | 103      | A_95_P255989 | AM798722     |
| 64   | 1   | 64  | 1192  | GTATATCCCATTGCTTGAAGTATGTTTATAGCAATGTGTCCTTTTGATATCTCTTCTT   | 107      | A_95_P210412 | TA19391_4097 |
| 68   | 1   | 68  | 516   | CCTGCATTTCTTTGACCATTGTGTGGTGTATAAAAGGCATTTGGAAATGTATCACTAA   | 115      | A_95_P066855 | BP136709     |
| 96   | 2   | 11  | 874   | TTGGAGGAAATGCCAACGAATTACGGAGGGTTTAGAGAAAAAGTGAAGGATTGG/      | 2        | A_95_P118807 | TA16218_4097 |
| 99   | 2   | 14  | 410   | GATTCCTAACTTGATAGTAGATTACAGGTGCATCTGATCATATGACTTCCAATAAAG    | 8        | A_95_P073690 | BP526277     |
| 103  | 2   | 18  | 426   | TTTCTTACGAATTAGTGTACTCGTTAATGTATCCCTAATAAGATAGGGGTAAGATCTA   | 16       | A_95_P213177 | AM807618     |
| 108  | 2   | 23  | 246   | TGGATCTGACTGCCAGTGAACCCTGCACCTGTTCTAAATGATCACATTTAATCTTTTT   | 26       | A_95_P104772 | CV017163     |
| 109  | 2   | 24  | 863   | TAGCACCTGATATGCTCGCATCTAGCTGACTGTTTAAATTATACTGTTGTTTATGTCAC  | 28       | A_95_P198842 | TA16866_4097 |
| 110  | 2   | 25  | 705   | ATTGAACTTGTGCTCCAAATGGAAGTGCAGAATTATCTATTACTAGAACCTATGCAT    | 30       | A_95_P232269 | EH622574     |
| 114  | 2   | 29  | 1055  | CCACTACTGAACTTAATCACCATTTGGATTAATCTTGCTTAACAGCAAAGTTTCTCTG   | 38       | A_95_P202097 | TA17562_4097 |
| 120  | 2   | 35  | 685   | GAGTCCGAGTCTAAGTTGTTGAAAGCAAATGAACTGAATGAAGTAAGTGAAGAGCG     | 50       | A_95_P118297 | DV161317     |
| 123  | 2   | 38  | 811   | GGTTCTGCTACAGGTGTCTATAAGACACTGGTGAAGTATTTAGTTGGAGTGCCACAA    | 56       | A_95_P138262 | EB442001     |
| 125  | 2   | 40  | 283   | TGTATTTTCTTTCTTATTAATAAAAACTAGCCCTAGGCGCTTGCTAGCGGATTG       | 60       | A_95_P147422 | EB451836     |
| 127  | 2   | 42  | 1177  | GAATTC AAGTATTGCATCATCGATACTGATGCATTTTCCATGTTATCTTTGCCATTG   | 64       | A_95_P007661 | TA15553_4097 |
| 129  | 2   | 44  | 721   | CATCCCCAAATATGCAGTTCAATTTATTGATGAGACTACTGGACATATAAGACAGTTT   | 68       | A_95_P204437 | EB683003     |
| 130  | 2   | 45  | 736   | CTTTTCTTTGAATCCTCCCTATGTAATGAGATTCTATATATGACATGCTTGAGTGGTGC  | 70       | A_95_P134077 | EB435899     |

|     |   |    |      |                                                              |     |                           |
|-----|---|----|------|--------------------------------------------------------------|-----|---------------------------|
| 131 | 2 | 46 | 525  | CTCGGTCGAATTTTGGGGTCAAAATTTTGTAACTGACTACTAGTTTTGTTCTTATCAA/  | 72  | A_95_P162367 EH621296     |
| 134 | 2 | 49 | 752  | ATTAGCTAATACTGTGTCCATGCACCGGTTCCAAAACAGCACGAGGATGTGTACTGG.   | 78  | A_95_P228639 DW000441     |
| 136 | 2 | 51 | 754  | CAACCTACAATGTGATGATCAGGTTTATTGCCTCCATCCAGGTGCAGAAGTTAAAATC   | 82  | A_95_P160222 EH618902     |
| 138 | 2 | 53 | 711  | ATTCAAAACAAAAGTCCCCAACAGTAACTGAAATGTGCCATTCTCAGGAGAGAAAAGA   | 86  | A_95_P145577 EB449328     |
| 142 | 2 | 57 | 530  | TCCCATATTTGGTGTAAACATTCTTATCCTTCACAGTATCAGGCATCAAGGAGGCTCA.  | 94  | A_95_P056696 BP134024     |
| 145 | 2 | 60 | 819  | GGCCGAGTGTGAATATGCAAAAAGATATTAACGCATGATGCATAAATAGTTTAACT     | 100 | A_95_P018191 EB425016     |
| 150 | 2 | 65 | 1406 | GGAGATCTATGTATAATTCCTTCATTGAGTACTCCTATTATGATGGAAATGTTCTTGCTC | 110 | A_95_P016916 TA12069_4097 |
| 151 | 2 | 66 | 1537 | GATATGCCTCATTGTACATCCTCTATTTCTATATATCATCATATTGTGGAACCTCTCC   | 112 | A_95_P177617 TA12022_4097 |
| 182 | 3 | 12 | 1523 | AATTTAAGTCTGCTATACTGTTTCTCTATGCAATGCCTCAAGTACCAGTACTGACTGA   | 132 | A_95_P025616 TA15544_4097 |
| 187 | 3 | 17 | 558  | GATGATATTGGAATCTTCATGACCACCAATTTTCTGTTAGTGAAGCTACTTTATGGA    | 142 | A_95_P243467 FG643614     |
| 191 | 3 | 21 | 686  | ACTTGAGCTGCTCTTGAAGGCATGTGAAGCTGTCAAACCTCAAACCTTATGCCAGAAA   | 150 | A_95_P019511 TA17507_4097 |
| 193 | 3 | 23 | 1630 | TTGAAAGCGATAGATGTGGACAGTTTGGAGAAAACCTTCTGGTGCCAAAGCATGCCGA   | 154 | A_95_P148717 TA14441_4097 |
| 194 | 3 | 24 | 661  | GACCATGCGCTTTTAAACAGTTTGATTCTGAACCATATGTTTGTCCCTGCATTACGAAG  | 156 | A_95_P068340 BP137106     |
| 205 | 3 | 35 | 771  | GCAGCAATCCTCCATAAACAGCTTTCATATCCATGACATTCCCTACTGAAGACCAGGT   | 178 | A_95_P228484 FG171716     |
| 208 | 3 | 38 | 630  | TTGAAACCACTCATCGTACCAATCTTGAGCGAAGGAGAATGAGATGCTTATGGAATC    | 184 | A_95_P284553 FG642068     |
| 210 | 3 | 40 | 434  | GTTTCGAATTTTCTGGTCAAGCTTTGTCTGCTATCCATTTTTTGTACATTTGGACAGAA  | 188 | A_95_P094548 EH619915     |
| 214 | 3 | 44 | 760  | ACTGGCCATCCTGTGTTTGAGACAGCATATGGCAAGATTGCTGTTAATATATGTTACC   | 196 | A_95_P269866 EB427498     |
| 218 | 3 | 48 | 462  | GAAGTGGTACCAATTGCAGTCTTGCACCTACATACTATCATGCTGCTGACGTTTCTT    | 204 | A_95_P192517 FS407121     |
| 219 | 3 | 49 | 1259 | GTAAGTCTGCTACTTGATACTTGAATATATACCATATATATTTGACGTTACTCGG      | 206 | A_95_P025021 TA13312_4097 |
| 221 | 3 | 51 | 748  | ATAATAAACAGAAAAGTTTGGCTGGTAGCCTCTCCATGTTTGTCTCGGTTTCTGGT     | 210 | A_95_P118202 DW003261     |
| 223 | 3 | 53 | 715  | TTTGTAATGTGTGGCCTAAGCTGCATTGCCGATGCTGCTAGCCATGAAAATAATTTTG   | 214 | A_95_P253374 FG150164     |
| 224 | 3 | 54 | 362  | TCCAAAGGTCAATCCATGAACCGATTTTATAAATTATGATCCCGTTGGTTTCGCAGGG   | 216 | A_95_P157867 EH615898     |
| 225 | 3 | 55 | 441  | TCTCACTTTTACATGGGTTACACTAGATCAAAGTATACTTTTCTTAGCTTAGCTGACT   | 218 | A_95_P192677 DV162205     |
| 238 | 3 | 68 | 221  | TCACTGAAAAGATTGAGAATATAAATGACCAGTATTGGACATTGCGGGCAGATCCGC    | 244 | A_95_P154422 EG649585     |
| 241 | 3 | 71 | 691  | TTGCCTTCTTCTTCTTCCCTGAATTTTTGAGACCAGTAATTGATCCAATTGCAACA/    | 250 | A_95_P162122 EH620925     |
| 244 | 3 | 74 | 290  | TCAAAAAGAGTCAATTAACCATTATGTTGCCACCCCTGCAATTCATCTCGCAACGATA/  | 256 | A_95_P101548 CN498857     |
| 271 | 4 | 16 | 665  | CGAGGCCATTTTGCCACATGTAATTTCAATTTGATGTTATGTTGGTTTGAATATATGC   | 141 | A_95_P126012 EB425210     |
| 272 | 4 | 17 | 637  | CCAGATATGATAGAGCTAGGGGAGTTGAAATAGGGAACAAGGACATCAAGCTGAG      | 143 | A_95_P054976 BP133575     |
| 274 | 4 | 19 | 379  | ATTCTTGTAAGCATTGATTGTTTCGAGAGGAATGGTCATTGCTCAGGAATAGATAATC   | 147 | A_95_P030076 TA18497_4097 |
| 278 | 4 | 23 | 404  | TATATGTGTGCTTCTGATCCTAAGGAAGATCCTCCAAAACAATTCCAGGGAGTGAG/    | 155 | A_95_P080025 BP527906     |
| 280 | 4 | 25 | 1010 | TGAGTGAAGATGAGTCTGTTTCAGTGATCTATGATCAGAAAAGGAACTTAGCAGCT     | 159 | A_95_P029391 TA16965_4097 |
| 282 | 4 | 27 | 758  | CTTAGCTGGTTCTGTGCTATGCCATCATTTCTCATAAATTTTTGGTCACTTGCATCCCG  | 163 | A_95_P218832 TA21262_4097 |
| 285 | 4 | 30 | 1364 | GATTCTTTAAGATAGCCTGGTGTAATTTTGTATCAGTTCTAATGAACTATCCTTTGCC   | 169 | A_95_P013036 TA12793_4097 |
| 286 | 4 | 31 | 486  | TTGGAGTGCAAAACTAAAACCTTTATAAAAAGTTGATCCACTTGGTTGGATATCTTCCC  | 171 | A_95_P220127 TA21544_4097 |

|     |   |    |      |                                                             |     |                           |
|-----|---|----|------|-------------------------------------------------------------|-----|---------------------------|
| 287 | 4 | 32 | 576  | GATGTGATTTGAGTCTAGAAGTATGTTGTTTGAGGTTTTCTGTCATTCCCTATTTCAAC | 173 | A_95_P112927 EH618900     |
| 288 | 4 | 33 | 165  | ACTATTGTTGGTCTCTTGCATTCAAGCCCTCAATTTGCAGCAGTTTCATTATTTCAACC | 175 | A_95_P110357 CV019698     |
| 292 | 4 | 37 | 92   | GTGGAAGAAGTTCCTAAAGTTATGATGATTGATGCCAACACTTTTGTAGAATGATGT   | 183 | A_95_P130427 EB430486     |
| 293 | 4 | 38 | 339  | TAATCTCAGAGATGCTTTGGAACGTGGTTATTCAATGGATAATTTGCTAATTCTCAGG  | 185 | A_95_P223257 TA22210_4097 |
| 295 | 4 | 40 | 438  | ATGGTTAAAGAGAAAAGCGAAAAGGCCATCTGTAATAGAGCTTGAAGTGGCTGCAATT  | 189 | A_95_P090918 BP531140     |
| 298 | 4 | 43 | 905  | GCCATGATAACTGTAGAAATTGATCCTAATGATATTTATTGTACCAGAAGAGGACCC   | 195 | A_95_P212702 TA19892_4097 |
| 299 | 4 | 44 | 679  | CCTAGATAGCCAATGAGATTGAAAATGTCGGTTAATGACTTCTGGTTAATATCACTCA  | 197 | A_95_P223042 TA22163_4097 |
| 300 | 4 | 45 | 823  | TTGGGGGTTGCAATGGTCTGAAAATCGTTGCACCTTTTCAGATCATGTGCGTATTATA  | 199 | A_95_P120347 DW000191     |
| 307 | 4 | 52 | 603  | GGCTCGTAGCCTTGATGTTTCTATTTTTGCATGACCAGTGGAGTTTAGACCTTATATT  | 213 | A_95_P122427 DW002401     |
| 318 | 4 | 63 | 1063 | AAGATGAGCCTACAGAGGGAGCTCCGGAATCTTTCTGCTTCAGTTTTACCTGGTAA    | 235 | A_95_P198057 TA16697_4097 |
| 322 | 4 | 67 | 351  | GAGATAGACTGGAATGGCAGTTTTATGCACTAGCTTGAATTCAAAATGGATTGAGAT   | 243 | A_95_P026121 BP530829     |
| 326 | 4 | 71 | 1489 | CTGGTTTGACCAAGAGGACGAAGCTCGGGGTAATTTTTATTTGTATATATAAATCAA   | 251 | A_95_P202027 TA17545_4097 |
| 327 | 4 | 72 | 689  | GTGATGGTTTAGTTGGATTATACAGGGGGTTTGTCCCAATGCGCTGAAAACCTCCTC   | 253 | A_95_P213537 TA20069_4097 |
| 328 | 4 | 73 | 1264 | GAACTATTCTTGGCTTTTTGTGTTCCACCCGAAGCCCTATGAACCTGCATTTTGAAAA  | 255 | A_95_P249317 U91924       |
| 329 | 4 | 74 | 337  | CTGATGTAGTGAATTTGGTGTGTAATTTTAAATCCGGATGAACATGACTCATGCTT    | 257 | A_95_P030896 EB444971     |
| 354 | 5 | 14 | 855  | TCTCAAACTGAACAGTCATATCTATTTGTGAAAGAGAGTGGCTTTTCAGAAAAGTC    | 271 | A_95_P131332 TA14146_4097 |
| 355 | 5 | 15 | 1082 | CACTTGAGAGGTTTCTGCTCGAGATTTTAGTCCGATTAAGCATCAATTTTTGAAGA    | 273 | A_95_P182887 TA13330_4097 |
| 358 | 5 | 18 | 694  | TTTGGCAATGAAGTTAATGGAAGAGCGAATAGCTCATCCAGATAAGTATACTGATGA   | 279 | A_95_P141182 FG143459     |
| 361 | 5 | 21 | 591  | CGGAATAGGTTTCTGCTAAATGATGTTAATGTTCTTGATCTAGAGACAATGACTTGG   | 285 | A_95_P070695 FG159775     |
| 364 | 5 | 24 | 591  | TTGAAACAGAGTCAGTTGCTATCTTGTGTTATGTTTTGCTCTGCATATGGGACCTAAT  | 291 | A_95_P160137 EH618785     |
| 366 | 5 | 26 | 2415 | ATGAACTGTTGTGGCTCTGTTGAAGTGTTTGTTCATGCACGGATGCACCCATTTACTT  | 295 | A_95_P180402 TA12734_4097 |
| 372 | 5 | 32 | 537  | GTATATATTCATAGCATTTCAAATGCAGAGGGAGAGCGCATGGTGTCTACTGTCTA    | 307 | A_95_P036008 BP128618     |
| 374 | 5 | 34 | 805  | CTCTGTTTCTGCATTATAAGAGAGTTTTCTGGCTTGAGATGCCGCTCCAGATGAAACG  | 311 | A_95_P179912 TA12615_4097 |
| 378 | 5 | 38 | 564  | TGTGTTTTGGTGTAGAATTTCTCAGTTCTGGCTATGTAGTTGAATCAAGTGCATTTT   | 319 | A_95_P001071 FG641470     |
| 383 | 5 | 43 | 810  | CTGTGACACTACAGTTGGGAAATATGTAATGATGTTTGTCTAGGTTCCGAGTTAATTC  | 329 | A_95_P178007 EB438099     |
| 384 | 5 | 44 | 282  | TACACTCTGATGTAATGGATGACAATATCCACATTGGAACCACTGTTCCGTCGCTCT   | 331 | A_95_P063155 BP135702     |
| 385 | 5 | 45 | 296  | TCAAATCTCACAGGAATGTGTTTGTGATTGACTTATTGTAGAAGGTCACTCCATCTC   | 333 | A_95_P131862 EB432289     |
| 386 | 5 | 46 | 420  | TTTGTCAAGTACGAGTACAATTAAGTTGCCAGAAAAGAGCTGGAACAGTTATCGAA    | 335 | A_95_P262716 AM791244     |
| 392 | 5 | 52 | 624  | ATGTCTGATTTGGTACTGTTGCAGCCTGGTGGATGATCACGATCAGTCATGTTTGT    | 347 | A_95_P057061 BP134118     |
| 393 | 5 | 53 | 299  | TTCTTAGACACCAATGATACTGGCAGTTGAATGTGATTTTTGTATGAGAAAAATCTT   | 349 | A_95_P142467 EB445919     |
| 394 | 5 | 54 | 1480 | CCCCATGTATCTGTTATCAACCTGTGTGCTAAGGGTTTATTTACTGAATCTAATATAT  | 351 | A_95_P199102 TA16920_4097 |
| 396 | 5 | 56 | 755  | GCTCAAGGACAACAAAGGATTTATGTAATAGGTTCTGTGTTATTTTCATGTCAACTTC  | 355 | A_95_P011226 X95752       |
| 397 | 5 | 57 | 845  | CTGTAGATGGACATGTACCAAGTAATAACTGTTAAGTTTCTGTAAATACACCTCTCT   | 357 | A_95_P214572 TA20290_4097 |
| 398 | 5 | 58 | 565  | CATTACTCAAGTGCATGTGTAGAGGAGATTTTTGGCACGCAATTGTGTGGTTTCTCCC  | 359 | A_95_P164247 EH623377     |

|     |   |    |      |                                                              |     |                           |
|-----|---|----|------|--------------------------------------------------------------|-----|---------------------------|
| 400 | 5 | 60 | 860  | ACTGGTGCTCAAGGCATGGATCAGTACTTACCATTGTTCAATGCTTAAGCGCAATCC    | 363 | A_95_P284493 EB443060     |
| 402 | 5 | 62 | 1131 | CTATGTTTCAGCTCTTGTTATTATAAGGGTTTTTATTGCACGAATCTTCAATCTTCTCAG | 367 | A_95_P024491 TA17600_4097 |
| 403 | 5 | 63 | 452  | GATCCGTTTGGGCTCTGTTGCTATTTAGGTTGAACCACAATTGTTTTGTATTATATTG   | 369 | A_95_P132142 EB432597     |
| 406 | 5 | 66 | 368  | TACATTGTAAACCTATGTTTGGAAAAGAATTATTGGCGTTTGGAGGAAGTGGGAGTCC   | 375 | A_95_P090493 BP530974     |
| 407 | 5 | 67 | 531  | GACGACTTAAATATGTTAGATGCAAGACGGAAGAAAATTTTCATGGATGAGGTAGC     | 377 | A_95_P133477 FG139569     |
| 412 | 5 | 72 | 496  | TGATTGTATCTCTTGAATATGAACCTTGTGTTTTGGTCTCTGTGCGTGCACGCC       | 387 | A_95_P183512 TA13476_4097 |
| 414 | 5 | 74 | 791  | GGTGTATGTTTTCGATTCTACCAACGTTATGACGACCTAATAATTATGATTAGGTG     | 391 | A_95_P000206 TA11706_4097 |
| 415 | 5 | 75 | 514  | CTTGGAGAGAGTATGCATGTTTATTAAGTTGTAGGTGTACAGAAGTGTAATTAAT      | 393 | A_95_P039876 BP129677     |
| 434 | 6 | 9  | 739  | TGAGATATATAAACTCCCTCTCAAAGAGATTTCTATTGGGATTCTTGCCCTATTCC     | 262 | A_95_P117007 DV159791     |
| 435 | 6 | 10 | 762  | CCGATTACGTAATGTATGTACGTTAACCTTCTGTTATGTCCTTAAGAAGTGAATTT     | 264 | A_95_P120062 DV999782     |
| 437 | 6 | 12 | 2082 | CCTAGTGTAACCTGTGACAATATGACTATCTCAACTTTCTTGTAAGTTTCACCTGTCT   | 268 | A_95_P238964 AY183721     |
| 438 | 6 | 13 | 800  | AGCAGGCTAATGATTGATAGGCTTTTAGTGAGGTACTTTCTCCCAATTTGGTA        | 270 | A_95_P190597 EB425670     |
| 441 | 6 | 16 | 776  | CTGAACAGCGATTGTTTCATATGATCGTATGATCTCCCCATTCTGATCCTTTTATCAA   | 276 | A_95_P204707 TA18121_4097 |
| 443 | 6 | 18 | 609  | TTTTACTTGAGCCTGTTTCAAAGATAAATGAGGTTGGCATATTGGAGCTGTTTTGAC    | 280 | A_95_P027936 TA15225_4097 |
| 445 | 6 | 20 | 672  | AAATTTGCGCAGTTGATGTACTGGGTTTTATCCTAAAATAGTGCATCTCGTTCCTTT    | 284 | A_95_P235244 FG640658     |
| 453 | 6 | 28 | 894  | CCATTTTAGACGCTATTCAAACATGATAGTAGTATATGACATTTTTGTTGACGTGG     | 300 | A_95_P009751 TA13415_4097 |
| 455 | 6 | 30 | 694  | ATGTTGTACAGTTGTACGTTGAGCCACTACTAATTTCAATCCATATTCAACCCCTCC    | 304 | A_95_P021026 TA15945_4097 |
| 458 | 6 | 33 | 1836 | GGTTTCTATGTTGTGATTTGAGTACAGCTTGTAGGTTGATGAACTGACTCATTCA      | 310 | A_95_P011666 TA12667_4097 |
| 464 | 6 | 39 | 1365 | GAGTGGGTAAGGAGTTGATTGTTGGGTCATCTTATTCTTTTATTCTCTATTTGACTT    | 322 | A_95_P029081 TA12248_4097 |
| 470 | 6 | 45 | 883  | CGTTTGTGGAGATGATGCCCTTGGAGCTATGAATATAGAGATGGTTGAAATTGCT      | 334 | A_95_P292013 EB425986     |
| 471 | 6 | 46 | 919  | GGTATTTATGTAATTCGTGTGTTGGTCCGTGTTTCAATTGTTTCAGCTCTTTTATTCT   | 336 | A_95_P012161 TA13321_4097 |
| 472 | 6 | 47 | 929  | CTGTGGCTCAAGTTCATTATTACTTGAGGTTGCAGGCAATTGGTAAAGTTTCCGATT    | 338 | A_95_P026821 TA11780_4097 |
| 473 | 6 | 48 | 345  | ATCTCTGATAGGCATTTACAGCTGCTCTATTGCAAGGGAAATAATAAATTGCTATGA    | 340 | A_95_P029066 BP533408     |
| 479 | 6 | 54 | 839  | TGCATTCTGAACCTAGTTTAAACCTTACATTGCTGGAGTGACAGATGAGCTAACTCAA   | 352 | A_95_P148987 EB678617     |
| 480 | 6 | 55 | 829  | TCATCTGTTAAAGCAGCTTACATATGTGTCTCGACTGACTCATATCGGTCTCCTGAG    | 354 | A_95_P269216 FG161667     |
| 486 | 6 | 61 | 170  | ATTACTAAAGGCGCAAGACCTCCCCGAAGTCTCCAAAATCTGATGATGAAGAAGAA     | 366 | A_95_P034299 AJ718371     |
| 490 | 6 | 65 | 682  | ATGGTTGGAGTACCAAGGATTCTTTTGTTCGTGCACAAGTTATACCAGGATTGAAA     | 374 | A_95_P193562 DW002831     |
| 492 | 6 | 67 | 1109 | TGACTGTTGGTTTTGGATGTAGAGTTTGCTTCTTCTTGATATGAGTATGTGAATTCT    | 378 | A_95_P188352 TA14551_4097 |
| 494 | 6 | 69 | 1608 | ACACTGTCCAGTAGCAGTTTGTCTTACATATATGATGTGTCAACTGAATGCCACAAAA   | 382 | A_95_P012441 TA13731_4097 |
| 496 | 6 | 71 | 254  | AATGAAGAAAGTGTGCCTGTTGAGAATCTGCCCTGGAGTCTAAGCTTCAGCAAAAC     | 386 | A_95_P104927 CV017226     |
| 500 | 6 | 75 | 540  | TCACTGTTGTGAGGAATACTTTAGATTAGCTTATCAATTTGAAGAAAGCATGTTGCT    | 394 | A_95_P027046 TA15610_4097 |
| 523 | 7 | 13 | 1197 | ATTTGCACTCACTATTTGGTCCACCGTATTTCATGTGGCTCTTGTCTTAATTAATGTC   | 408 | A_95_P189027 TA14703_4097 |
| 529 | 7 | 19 | 862  | GGCATTGTTTTGGAGTTGTAACACATGTTGTGCAGCTTGTGGCTGTTCTCTGTTT      | 420 | A_95_P012681 TC41934      |
| 540 | 7 | 30 | 171  | TACAGTACTTTTTGTTGGTGATTAACGATTAATAACACCACTTGCCCCAGTTCTTGT    | 442 | A_95_P029356 TA22188_4097 |

|     |   |    |      |                                                             |     |                           |
|-----|---|----|------|-------------------------------------------------------------|-----|---------------------------|
| 542 | 7 | 32 | 488  | TGCAGTTCATTCACTTGGATTGAGAGTGATCCTAACTGATTGCAAATCCACATATG    | 446 | A_95_P263316 AM840768     |
| 543 | 7 | 33 | 378  | AAGAATAACACACAGGTGCTCATCACTGTAGGAACAACAGGAACTTCTCGGTCTG     | 448 | A_95_P1111177 DW000043    |
| 545 | 7 | 35 | 731  | GGTACTTCTTTAAATGGTTATGTCTCTGATGATCCTTTTGCTGATCAAATATAGGCA   | 452 | A_95_P192357 TA15434_4097 |
| 547 | 7 | 37 | 684  | AATTAATTAGACAATCACTGATTTGATTTTCAGTCCCAGTGGTCTGACTTCATATGC/  | 456 | A_95_P316418 FG189056     |
| 548 | 7 | 38 | 733  | ATGGCTTAATCCTGTAATATGTTGGTCATCGCTCAAGCTTCTGCTAGAGGAACCAAA/  | 458 | A_95_P269376 DW005181     |
| 552 | 7 | 42 | 379  | TAGACTTTATTTTTCAAGTTTCCCGGCTCAAATAATGTTGGCGGTGCGCAATCGGCGG  | 466 | A_95_P006151 TA14767_4097 |
| 563 | 7 | 53 | 843  | AATACAATCTGCATCAGCATTATATGGAGCAGCGAGAATACAGTTCCTTCGATCAGCTC | 488 | A_95_P236059 FG174267     |
| 569 | 7 | 59 | 533  | AACGGCTATTCATCAACCACTCAACATTATGTGTTTTCTGGCCATAATTCGGAGTTTG  | 500 | A_95_P021241 FG137478     |
| 570 | 7 | 60 | 287  | ACAAAGTCATGCCTTACCAAATATGAGGCTCTCAAGCCAAAACATGGGCGACAAC     | 502 | A_95_P047526 BP131680     |
| 572 | 7 | 62 | 565  | ATTGCTGTTGACGCTGCTAAGAACCTTCTTGCTTTTTCATATGAAGAAAGGGTTGGA   | 506 | A_95_P301823 FG635691     |
| 578 | 7 | 68 | 1105 | TTTTCAAGAATCACTCCACCCTGCCTGCTGAGATGACTGAAGTTTCAGGCATCCGAA   | 518 | A_95_P178437 TA12252_4097 |
| 580 | 7 | 70 | 846  | CAAAAAGACCAATTACAACAATGGAAACGCAACCGCCGTGCCTTGGCATATTCTACTC  | 522 | A_95_P118982 DV162047     |
| 587 | 7 | 77 | 697  | AGACACCTGAGTCATGGGCTCCAAATGCAGCTAATATGATACTGAATCTAACTGCAG   | 536 | A_95_P294083 EB439461     |
| 588 | 7 | 78 | 583  | ATGCTTTGCCAATGAAATGGACCAATAGAAATGCTGGCAATATTTATTTTCGTGACTTC | 538 | A_95_P203937 TA17960_4097 |
| 603 | 8 | 8  | 511  | AGAATATTTAGGCATTCAACAAGTGGTTTTTGGTGGTCGTCGGATGGGTGATTGGGA   | 399 | A_95_P029891 DV160581     |
| 605 | 8 | 10 | 763  | GCTTTTTACTGTCGGTTTAAAAACAAAACCCGGGGGGCGCCATCAGAAAATCAAGT    | 403 | A_95_P266681 EH665604     |
| 606 | 8 | 11 | 741  | GCTGGTTTCTGTAAACCCCTTCTGTTTTACTGAAATAGAGATCTAATTTAAATGGCC/  | 405 | A_95_P119547 DV998889     |
| 609 | 8 | 14 | 516  | GATGGACCATGTAATTTTGTGGCGTTTGCATACCTTGAGATAATATACAGGGAAI     | 411 | A_95_P200232 DW003491     |
| 610 | 8 | 15 | 467  | TTCCGCACATTTGAACTCTCCAATGTTGAGTTCTATGCCTTGAATGAGCATTGG/     | 413 | A_95_P096708 BP533729     |
| 612 | 8 | 17 | 344  | GTTGGCCATCATATATTGCAGTGGATATGGTCATTTCGATATTGAGATATTGTAAATCT | 417 | A_95_P092793 BP531974     |
| 617 | 8 | 22 | 893  | TGCTCAGCGTGATAGCCAATGGCAGTTGGAAATCCAAGTTAAAGAGTTGACTGTTT    | 427 | A_95_P217637 TA20976_4097 |
| 618 | 8 | 23 | 782  | TAGCAGGCATTTGACTCAGTTCTCCTTTCTAATAATCTCTCCTCCATTTCTTAAATGGC | 429 | A_95_P287598 EB678998     |
| 621 | 8 | 26 | 224  | TTTGTGTGCTGCACGCAGCGTCTGTTTTCAGCATTGACATTCTTTATAAGGTTCTTT   | 435 | A_95_P140772 EB444610     |
| 625 | 8 | 30 | 483  | CCTTTGTATCATGTATATGCCAGGAGAATATAGTTAACATTATTGAGAAAGAGGCAT/  | 443 | A_95_P131192 EB431321     |
| 627 | 8 | 32 | 418  | ACTTTTTGATTACCCGAGTCGTTATCAGACTAGTGTGCCTGTGTAATTCCTATATTTTT | 447 | A_95_P132312 FS424443     |
| 629 | 8 | 34 | 645  | TATGTTGCTCAGTATGAGTTTTTGGCATTCTGTTTTACAGAACTTCTATGTTGAATGT  | 451 | A_95_P285878 FG643752     |
| 630 | 8 | 35 | 810  | CCGAAAAAGAAGCAAGGAGTACATTGTCTAACTCTTTAGTGGAGTCTGCGGTAA      | 453 | A_95_P294983 EB443347     |
| 634 | 8 | 39 | 797  | TGGAGCGGACAAGCGGATCATTGGATTTGATTTGCTAGCTCAAAGAGCAGAATACA/   | 461 | A_95_P150432 EB680511     |
| 635 | 8 | 40 | 243  | GTCTGCTGAAATCAAATATTTGCACTTTTGCCAGTTAAATGGAGAAAAAGAGATTA/   | 463 | A_95_P028261 TA13558_4097 |
| 638 | 8 | 43 | 966  | ATATAATATAGATGAATGCATGTGCAGACTAGTGAGCTTGGTCTAATGAGGGCTTGT   | 469 | A_95_P008131 TA12822_4097 |
| 639 | 8 | 44 | 779  | TTAGGAATTTATCCATCGCCAGTCGTCTGTCCCTCTGCTGATCTAAGTTCAACTCTT   | 471 | A_95_P116552 DV159312     |
| 641 | 8 | 46 | 854  | CTCTTGCCATTTGATTCAGTCGGTACTTTATTGGTGAACATGACATTTGTGATTGTA/  | 475 | A_95_P027581 TA16249_4097 |
| 642 | 8 | 47 | 1425 | CAAGCTACGAAAGCAAATCCAAGTGTGTAGAGTCACTATGATGTAATAAACATGTI    | 477 | A_95_P009856 U60057       |
| 645 | 8 | 50 | 980  | GACAAATGTTTTTCACTCATGCAATGATGCCGAACCTGAGACAGATTGCCAAGTACT   | 483 | A_95_P287388 TC56180      |

|     |    |    |      |                                                              |     |                           |
|-----|----|----|------|--------------------------------------------------------------|-----|---------------------------|
| 647 | 8  | 52 | 821  | TAAAAGCTCGGGTGAACCTGTTGGGACATTGCTGACATTCTGGGACGTGAATTGTGT    | 487 | A_95_P293178 FG156161     |
| 657 | 8  | 62 | 477  | GAATGTCTGAACAATTGGTTACAAATAAACAAGGTCTGTCCAATGTGTAGCACTGAG    | 507 | A_95_P090863 BP531123     |
| 659 | 8  | 64 | 816  | ATAGAAACCGCAAAGCTTCTGGCCTTGAAGGAAGGTTTACTTGTGGGCATATCATCT    | 511 | A_95_P125592 AM087458     |
| 661 | 8  | 66 | 1455 | ATCACTGGAGACTTGTCAACAACAGTTATCAGGCACTAAATGAAGGAAAGCCTGTAA    | 515 | A_95_P089993 TA16258_4097 |
| 666 | 8  | 71 | 410  | CAATTGGAAGATGGACGAACCCTCGCTGATTAACATTCAAGAAGGAGTCAACCATC     | 525 | A_95_P112762 CV020825     |
| 668 | 8  | 73 | 1367 | TGAGATGGTAGGTGTGGGCTGTAAACGAGTCAAATGATAGATTGCTATTGGAACCA     | 529 | A_95_P193557 TA15698_4097 |
| 671 | 8  | 76 | 471  | GAAAGGGCAAATTGGTTTCTGACATCCACTGGTTATGTCAGTGGACCAAATCCCTTA    | 535 | A_95_P088108 BP529962     |
| 700 | 9  | 20 | 296  | CAAGGGCAGATGTCGTACATACTATGTAATATTTGAACTGGTTATTTAGGCACTCCTC   | 563 | A_95_P104447 CV017016     |
| 703 | 9  | 23 | 502  | GGTGGAACTTATATGTCCTTTCTTTTCCCATGAATTTGGCATGAACATTTCTTCC      | 569 | A_95_P101113 BQ843168     |
| 711 | 9  | 31 | 343  | ATTTGGGGTAGGGGTTAGTGGAAAGCTTCTTTGGAACAGATGTAGGGGTTAACAGA     | 585 | A_95_P108917 CV019063     |
| 713 | 9  | 33 | 1095 | TTCAAGACTGCATTGTGTGTATAATGTCATTTCTGTTAATATAGAGGGCCATTTGGAA   | 589 | A_95_P211412 TA19604_4097 |
| 714 | 9  | 34 | 781  | AAATACCATATCAATGATCTGGTTCGACAGTTGGAGATCGGAAATGTTTCCGATCCA    | 591 | A_95_P190682 TA15068_4097 |
| 715 | 9  | 35 | 112  | CTCAACATTGCATGTTATGTTCCAGTTGTGAATTGATAACGGCATAATTTTCTTCCAC   | 593 | A_95_P095883 BP533375     |
| 718 | 9  | 38 | 704  | GCAGTTAACAAAACACTGTTGCATTTGTGAGTTTGTAACTCTCTAATGGCAAAGCAAATC | 599 | A_95_P136152 EB439783     |
| 719 | 9  | 39 | 615  | AAACTCTGGTGGGGCTCCACAAGGAATTCACGAAAGGTGGTATTTTGTCTTCTCT/     | 601 | A_95_P004866 EH665108     |
| 720 | 9  | 40 | 244  | CGTTATGCCACAGAGAAAGTGACCAGAGAAGAATTACGAAAGTCACTTGAGGATGA     | 603 | A_95_P215557 FG160952     |
| 721 | 9  | 41 | 94   | CCACCAATATCTCTCGTCGACTGAAACAACATAATGGTGAATAAAAAGCCGGGGCA     | 605 | A_95_P155127 EG649912     |
| 723 | 9  | 43 | 370  | GCCCGGTCGTATTTTTTCTATTCCATTTTGTAAAGTGATACCTTTGAAAGTTACTCACA  | 609 | A_95_P110982 CV019994     |
| 725 | 9  | 45 | 782  | AGACCTTGAAGTTGCTGGAGCATCAAAGTTGGATGTGGCTTTGGTAACCACTGTAAT    | 613 | A_95_P289258 DV158360     |
| 734 | 9  | 54 | 278  | TAACGTTCCATTGTGGAGAAGAGACTGATACCAAATTCCTGTTGACCTTCGTCAGTC    | 631 | A_95_P204607 TA18101_4097 |
| 735 | 9  | 55 | 176  | CTAGGTGGGCACCTTGTGATTGTTAAAAAGTAGATAAAAAGAAATGTACCAGTTTAC    | 633 | A_95_P127152 EB426613     |
| 737 | 9  | 57 | 813  | GATCTTAGAAATAGCTGTGATCTGATCCCATTCCTAGCTCCATTCTCATGTGTTCCCA   | 637 | A_95_P224767 FG143180     |
| 738 | 9  | 58 | 1438 | GTCCTGTTTCTAATGTGTTGGATATCTTGAGCCTTAGAAGATAAAAAGATGCACACTAT  | 639 | A_95_P028136 TA12404_4097 |
| 739 | 9  | 59 | 704  | ATTTGGTTCAAATGGCTGCTTGTAATCCCCCGCCACCCTGTTGCGTTTATCTTAT      | 641 | A_95_P029256 TA19404_4097 |
| 742 | 9  | 62 | 737  | CCAATTTTACATCCTCACTTGGGATTTTGATTATTCCGAATCCAAAGTAGAATGGC     | 646 | A_95_P021886 DV159766     |
| 743 | 9  | 63 | 631  | TTGGCCACACATCTGCTATTTCTGAAGCAACTGGAAGCCAGAGGACTGCATCATTTAC   | 648 | A_95_P149587 FG164564     |
| 744 | 9  | 64 | 425  | ATCCGAATCCGGACAATGATATTGGGTTACGTATTTTGATTGGATGATGACCACCA     | 650 | A_95_P096373 BP533597     |
| 747 | 9  | 67 | 460  | AAGGGTCTGTGCTTGTGTTTAAAAGTATCGTATTACTTGTAGCTGCTAAAAATA       | 656 | A_95_P214197 TA20209_4097 |
| 753 | 9  | 73 | 844  | TTGATTTATGGAGATGCTGACCGGCAGCCACTGTGATCATTTATAGTCGTTTCATCTTA  | 668 | A_95_P012311 TA14276_4097 |
| 759 | 9  | 79 | 650  | CCTTGAACAGTTGAGAACAGTCTCGTAGTTGGAGATAAATAATCCTAATCTGTTGA/    | 680 | A_95_P187542 TA14369_4097 |
| 772 | 10 | 7  | 449  | GCATTACTGGTGAAGGCTATATGCCAATTCTACAAAAAGACTACTTTTAGATTTTCG    | 540 | A_95_P016491 BP534995     |
| 774 | 10 | 9  | 607  | GGCATCATGTGCAATAGAGTTGATGTAGCAGTGACTAAGTTCATCTTTAATCATGTA    | 544 | A_95_P025711 EB438078     |
| 779 | 10 | 14 | 808  | TAATTGTACCAATGCATATCTGATGAAACAATGAAGACGTAAAACGCAGATTGTTCC    | 552 | A_95_P195802 TA16197_4097 |
| 794 | 10 | 29 | 690  | TATTCTGTACGAATACATGGAACCTTTGCACCGTCTCTGTATATAAGCGATTGCTTTCC  | 582 | A_95_P218072 TA21091_4097 |

|     |    |    |      |                                                              |     |                           |
|-----|----|----|------|--------------------------------------------------------------|-----|---------------------------|
| 796 | 10 | 31 | 846  | CAGTAATGTGTGTATATTGTGACAAGGTGATGAATGAGTGTTTTAAGTTGAGATCCG    | 586 | A_95_P016951 EB427980     |
| 798 | 10 | 33 | 824  | GAAATTTTAGTACCGAAGTCCCTGATTTCACTGCCAAGAAAAGCGTCTAGCGAGG      | 590 | A_95_P032686 AF043554     |
| 802 | 10 | 37 | 681  | TTGGTGGCGGCACTTTCTGGGGCCTAAGGAAAACCTTTTGACTAAATGCAAAGTTTGA   | 598 | A_95_P296403 FG175896     |
| 807 | 10 | 42 | 5987 | TGAAAATTCATTAGAGTGGGGTTCTTCTATGGATGAGAAGGCACTTTAGGTTCT       | 608 | A_95_P238744 AB080692     |
| 808 | 10 | 43 | 477  | CTAGAGTTGAGCCTTTTGAAAAGATACTATCCCTCCGTTTCAATTTATGTGAACCC/    | 610 | A_95_P144007 FG635525     |
| 810 | 10 | 45 | 1384 | TGGTCTTGAACCTTTTTACTGTGCAATCAAATGGGAAGACTATCTCAAACCTTTGGT    | 614 | A_95_P177482 TA11987_4097 |
| 818 | 10 | 53 | 785  | ACACTTCAATGGAAGTTTACTTTGTTTGCAGTTTACCTAAGCCTTTCTCTAGTTTTTCC  | 630 | A_95_P109167 TA12316_4097 |
| 823 | 10 | 58 | 774  | ATGAGGAGGTAATGTAAGTCTGGCTTCGTAATGTTCTTATGTACGATAAAGATTTAG    | 640 | A_95_P148322 EB677604     |
| 825 | 10 | 60 | 639  | ATATTGCTCAGCTGACGAGTAGATGGAACACTATCCGTTGGCATTAGAACACTTGG,    | 643 | A_95_P130682 EB446106     |
| 832 | 10 | 67 | 739  | CAGGATGAACACAAAAGCAATACATCACATCCGTGTTCAACATTTAAGTTCTTTAAC    | 657 | A_95_P228154 DW004594     |
| 835 | 10 | 70 | 344  | GCTTTTCTGCTTTTTAATTGTTACCAGTTACTGGCCTTTTATTGAATGCCCTTAGTAAG/ | 663 | A_95_P108952 CV019083     |
| 837 | 10 | 72 | 606  | CCCAGTTTGGGGTTCGCAATTCAGATAACAGTTCTTTTGGGATATGATATGGGGCTT    | 667 | A_95_P215512 EH614410     |
| 838 | 10 | 73 | 213  | GGCTTTATGGAAGGATAGTTTGGCTAGCACTAGTAGCTGTTAGCTGTCACCTGGATA    | 669 | A_95_P114462 CV021612     |
| 839 | 10 | 74 | 817  | ATGTTCCCGCAGTTTTGTCATAATGTTTTTGTCTGGCTTAAGTCTCATGGCTGTAAGA/  | 671 | A_95_P224082 EB443143     |
| 840 | 10 | 75 | 742  | ATCAACTTGCCTGAGGCGACCAAAGTTTATTATGTGCACTGGTGGTAATGGTGCAGC    | 673 | A_95_P019801 FG167577     |
| 858 | 11 | 8  | 539  | TTAACCATATGTGTGCCTGGAATAGGTTGACCCGACTAATTCAGATTTGCGTCGTAG/   | 685 | A_95_P305688 FG645575     |
| 859 | 11 | 9  | 885  | GGGTAACAAGTTTCATAAATCTGGTGGTTACCAGTCTAGGGGATATGGGTATGATT     | 687 | A_95_P191507 DW000640     |
| 863 | 11 | 13 | 599  | GCTAATGATCCTGGTTGAGTTGAAAGTTCTCTTATTAATCCTCTTTTAGCAGTTTTGC   | 695 | A_95_P013096 TA13412_4097 |
| 866 | 11 | 16 | 977  | ATTTATTTTCTGGCTGGCTAGGTGGGATAGCCGAGCCATTCCCTTTTCTTCGGAT/     | 701 | A_95_P220802 TA21687_4097 |
| 876 | 11 | 26 | 794  | CATCTTTTACTCTTTGGATGACATCTAAATGCATATCCCTCGTCTGAGCTGGATCCTGC  | 721 | A_95_P024736 TC65556      |
| 881 | 11 | 31 | 571  | AAAGAGTATCACGGTCTTTTCTGAGTGATACTGGTATTATGCTCTTTTCCATAATGT/   | 731 | A_95_P152802 EB683143     |
| 883 | 11 | 33 | 549  | TAATACCTCAAGTTTTCACTTTGGCTTTTTGGCCATGGAATTGCATGTTTATCAACGTT  | 735 | A_95_P210377 TA19384_4097 |
| 884 | 11 | 34 | 712  | CATTATATCATCATATTCAGCTTCCAAAGTTGACGTTGAGCCTCTAATCGCAAAGC     | 737 | A_95_P303113 FG173678     |
| 885 | 11 | 35 | 488  | ATGCTCAACTAGTGGAACAATTGAATAAATCACGACATTATCAATGATGTCAAAGGT/   | 739 | A_95_P019281 TA13065_4097 |
| 886 | 11 | 36 | 750  | ACAGTTGGAGACCAAGATGCCTCTCTAGAATCCCTCCATTCCATTACCTTGATCATG`   | 741 | A_95_P145932 EB449699     |
| 889 | 11 | 39 | 462  | TAGACCTGGAGTCCGTTTTATATTTTAGTTTGATGGGTAGGTCGAGGCCATGTCC      | 747 | A_95_P090308 BP530896     |
| 906 | 11 | 56 | 537  | GATTACGTGGAATTTACCAAAGTACTTGGTTGATAAAGGACGGGAAAGTAATCCGCC    | 781 | A_95_P113662 CV021245     |
| 908 | 11 | 58 | 324  | ACAATTGTAATCGCCCTGGCCAAACAACAATGTTATAGTAACTGCTGATCAGAGTT     | 785 | A_95_P147147 U45243       |
| 912 | 11 | 62 | 163  | TTATCGTTTGTGTCATTGCATTGACAAGCTCCTGTAATATATGAATGTTCTTTTGGTT   | 793 | A_95_P108157 TA12282_4097 |
| 914 | 11 | 64 | 798  | AATACTTTTTGCTGTCTTCTCGTGTGAATGCTCTCATCTGGGAAGAGCATTCTTCTG    | 797 | A_95_P016706 EB682133     |
| 917 | 11 | 67 | 535  | ATTACGATCTTCACTTCTCACAGTTCAGCTTAGAAAGCTTGGACAGAGCGGAGGAGC    | 803 | A_95_P084410 BP529010     |
| 920 | 11 | 70 | 820  | TCACGGATAAAAAGTTAGAAACATTGTGTGTGGGCCAGGCCATGGTATAAGCATTGG/   | 809 | A_95_P204087 EB680983     |
| 924 | 11 | 74 | 618  | GCTTCCAACCTAATGTACATGCTTATAATCTGTTAATCTCACTGCCTTGGTTTGGTC    | 817 | A_95_P211417 TA19605_4097 |
| 925 | 11 | 75 | 617  | AGATTGCAGAACTGAAACAATCTCTATGAAGCCTGATGTCGTTGAGGTGTGGGATC     | 819 | A_95_P137887 FG141586     |

|      |    |    |      |                                                                |     |                           |
|------|----|----|------|----------------------------------------------------------------|-----|---------------------------|
| 944  | 12 | 9  | 713  | GTGCTTAGCTTCCTTTGATTTGTAACGCTTGTTATGTAATCGACAGCTAATCATCTATG    | 688 | A_95_P185322 FG638902     |
| 946  | 12 | 11 | 581  | TTTCCCTTGGCTTGTGGACGGTATAGCATGTGCATTACCGAAATAGAGGCAGGATTT      | 692 | A_95_P189007 TA14699_4097 |
| 950  | 12 | 15 | 859  | ACCTTGTTGACGTGAGTCACACCATCACTACAATCTTCACAGCTATTTTATTCGTTCTA    | 700 | A_95_P292753 EB428347     |
| 954  | 12 | 19 | 454  | CTCAAGAGGTCATTATTCTTTTGTAGCTAAGGGTCTCTTTGGCTTGAACTACATGAA      | 708 | A_95_P071565 BP525734     |
| 956  | 12 | 21 | 1439 | GGTTTCAGAAAACATTTAGAAAACAGATCACAGACTCAGTTTAAACGTTCAAGTGTGTTAGT | 712 | A_95_P017931 TA15520_4097 |
| 957  | 12 | 22 | 1263 | GCTCTACCTTTTTCCGTCAAAAGGACGAATACTTTTACTCATTAAACAAAAGTGTGTTT    | 714 | A_95_P196147 TA16276_4097 |
| 959  | 12 | 24 | 574  | TGTTGTTCTGAGGTTGAGATGGCATATTATTACGAAAATGCATCTTACATGTAGCCT      | 718 | A_95_P186897 TA14226_4097 |
| 962  | 12 | 27 | 1195 | CCGCCAGCATGCTGATTAATTATTAGTACGTCTTTTCTACCTCAAATTATGTCTATGAA    | 724 | A_95_P033041 AF248538     |
| 965  | 12 | 30 | 757  | TTTTGATGATTTGATCCTCGAGGGACTTCAAGTACTAAGCCTTCCACCGAAAAATCT      | 730 | A_95_P152307 EB682651     |
| 968  | 12 | 33 | 688  | TCAATACTACGACCAATCTGGTAATTACCACCAGAGGAACCATTTAATAACTATAGG      | 736 | A_95_P263761 FG194966     |
| 974  | 12 | 39 | 820  | GGTGCTTGTGCTGATGTAGAACACTCATTATGTGAATAAATAAGGTGGTATAGAAGT      | 748 | A_95_P017451 TA16621_4097 |
| 975  | 12 | 40 | 105  | GCTTTCTAAACTCTAAATCTTAGAAGCTCATGATTTGTAAGTACCAGCCCTTGGAAAAAT   | 750 | A_95_P242962 BP136210     |
| 977  | 12 | 42 | 505  | ACACCGAGTCAAACCATCTTTTGCATGGAATCTTTTTCTTGGCCATGCCTTGGGGA       | 754 | A_95_P261866 BP535041     |
| 980  | 12 | 45 | 0    | AATGTTATTCCTGGCTATTCTGGTGACGCCATTCTGATGTTAGGCAAACCTCAGAG       | 760 | A_95_P018896 A_95_P018896 |
| 981  | 12 | 46 | 747  | TGCATGCTTCATTGCGCTCATTGGTAGTGAGCTTGTTGAGAAAATTTGTTTGGTGAGC     | 762 | A_95_P161222 EH619974     |
| 987  | 12 | 52 | 1384 | CACTGTTATTAGGTCTAATTTTTCATGTTATGACAGGACGTTGCAGTAATGCAATTTA     | 774 | A_95_P186867 TA14220_4097 |
| 993  | 12 | 58 | 866  | GTGGTTAAAAGCTGTCGATATGTAGTTGGTCAATGGTGCTGTTATATATGTCACCTCC     | 786 | A_95_P235814 EB438108     |
| 995  | 12 | 60 | 741  | ACTCGAAATGCTGTATAAATCTGCAATGGCCTCCACATGGAGGAAAGCTACTTGTTC      | 790 | A_95_P311933 FG182336     |
| 1001 | 12 | 66 | 333  | GATTTTCGAGTGTCCATGCGGGGTTTCTGTTGCAAGCTTCTGTTTATTAGCTGCTGAA     | 802 | A_95_P255334 FS390767     |
| 1010 | 12 | 75 | 687  | TTGTTGGATGTTCTACTGGGATGCTGAGATATTAAGACTTTGTTACCTCTGTTGGATG     | 820 | A_95_P291363 EB443533     |
| 1011 | 12 | 76 | 847  | TCACATCCGGTTGTGACGCCACTTGTAAAGACGAAAGTGCTTACTATAATAGCAGTAT/    | 822 | A_95_P230634 FG153736     |
| 1013 | 12 | 78 | 230  | AAAGTGATAAATTGGTTCAAGTGAAGCAGATGGTATGCATCAGTTTTGTTTCATTGTC     | 826 | A_95_P103572 CV016582     |
| 1014 | 12 | 79 | 701  | AACCACACGTGGTCAAGTTGAGCTTTTATCAATATTAATCTTGACACCAAATTCTA/      | 828 | A_95_P218477 DV158252     |
| 1032 | 13 | 12 | 589  | CTGTCCCTCCCTTGGATTTTGTGCGCTCATCTTTTAAATAATTTAGCTGTTCAAGCC      | 840 | A_95_P018666 TA15222_4097 |
| 1034 | 13 | 14 | 1846 | GTTAGTCCATTTTTAATTATTTTCTTGGCTATAGATTGGTTGGCAGCTGTAATCCCC      | 844 | A_95_P101338 AB063573     |
| 1037 | 13 | 17 | 1460 | GGAGACTTGCAACAACAGTTATCAGGCACTAAATGAAGGAAGGCCTGTAATGTCCT       | 850 | A_95_P196067 TA16258_4097 |
| 1041 | 13 | 21 | 525  | TTATCTTATAGATATCTGAAAGTTGGAGCTACAGTCCCCTGAATGATACTGAGGAGG/     | 858 | A_95_P083975 BP528901     |
| 1046 | 13 | 26 | 456  | ACCAGCTCGGCTGTACTTAATCACTACTGTAAAACCTGATATGAAAGTCATTACTCC      | 868 | A_95_P003151 TA15228_4097 |
| 1047 | 13 | 27 | 1049 | CACGTATACTTCGTGGGGAAATTTTTGATGTATTGAATAGAGAAAATGCAGCTCTA/      | 870 | A_95_P012456 TA14712_4097 |
| 1051 | 13 | 31 | 801  | GATGTTCTACATTCTCAAATTCGCGAGTTGGCAAATCTGTTCTCTGGCAATTGAT/       | 878 | A_95_P254744 FG645377     |
| 1059 | 13 | 39 | 798  | CTATTCTCCAGTGTGAAAGTTCTAAAAAGCACTCCGTGACAGTAAAGTTTATCTGC       | 894 | A_95_P136062 EB439624     |
| 1060 | 13 | 40 | 507  | GCCACTGTACTCGAATTTTTCATGAATTAACAATATGTTTGTCTTTTCAACTCAGTCGC    | 896 | A_95_P199682 EB428431     |
| 1062 | 13 | 42 | 490  | CCCTCAGGTAGCTAGTGCGACAGCAACATTTGTGATGATGTTCTCATCATCTTTATCA/    | 900 | A_95_P155647 EG650179     |
| 1064 | 13 | 44 | 526  | ACTGTTGTTGCAGCCTTGTGGCCTAGGTCAATATATATATGTCGTGTTGGACTCTTA/     | 904 | A_95_P308353 FG642098     |



|      |    |    |      |                           |                                      |     |              |              |
|------|----|----|------|---------------------------|--------------------------------------|-----|--------------|--------------|
| 1065 | 13 | 45 | 420  | AGTTTCAAGCACTGATATAGTCGGT | CGAATGCTTCTTTGTGTGAGAGAAAGTCCAC      | 906 | A_95_P058821 | BP134571     |
| 1069 | 13 | 49 | 748  | CCGAAAGATTTGGATTCTGACACT  | GGAACAGGATAGAGTCTGTCTGGCATATTTAA     | 914 | A_95_P164787 | EH624095     |
| 1071 | 13 | 51 | 518  | TCATGCTTCTGTTTCTTATTCCAT  | CTAGAAAGGTCCAACAGGCTTTGATTTGATATTCA  | 918 | A_95_P073150 | BP526144     |
| 1072 | 13 | 52 | 648  | GGTACGTTTGAATAATAAAAAAGA  | AGTTCTCTTTCTAATCCTATTTAGATTCTGTCCGG  | 920 | A_95_P016546 | EB432718     |
| 1078 | 13 | 58 | 233  | CAGTTGGAAGTTTTGATTGTAGTT  | CATTTTGATGGCTTTGACAATTGAAATGCTACTC   | 932 | A_95_P000781 | FS383363     |
| 1081 | 13 | 61 | 232  | GCAGCCTCTACATGGAAGAAGTGC  | ATGTAAGCTGGGGGAAGAATTATGGTTTAGC      | 938 | A_95_P128062 | DV159197     |
| 1087 | 13 | 67 | 758  | TCTTGCTGGCTTCATGAATTTAAT  | AGTTAGCAATAGGTATGCCCTCTTGTTCTTTTTTC  | 950 | A_95_P015131 | EB425115     |
| 1088 | 13 | 68 | 563  | GTTGGTTGCATCAGCACTGTAATGC | AGTTCTCTTTCTTATGCTAATGATAAATGGA      | 952 | A_95_P124112 | EB437086     |
| 1089 | 13 | 69 | 0    | ATGAGCGCTGATACTATCACTGGG  | GACATAGTTTTATCTGCACAGAAGAACATCCA     | 954 | A_95_P259776 | A_95_P259776 |
| 1091 | 13 | 71 | 802  | CTCGTGCATTCAATTAACACAACG  | ACGGTCAAGCAAATGGTTATTGGTTCAACTGCA    | 958 | A_95_P233494 | EB426692     |
| 1093 | 13 | 73 | 511  | GCAAAAGGTGAATTCACGTGAGCAC | CAGCTTAGCTAGCAAAGGCTAAATCTGGGAT      | 962 | A_95_P293318 | FG638280     |
| 1094 | 13 | 74 | 291  | CTTCTCAGTAGTCAGTTTTGCAGT  | TCAATTTCCAGGCTCTCTGTAAATAGTATATAT    | 964 | A_95_P213932 | TA20153_4097 |
| 1099 | 13 | 79 | 1282 | ATGTTTGTGTACCTAAGAAGTCAT  | GCTCTGACCATCATGTACTAGGAATACCTTTT     | 974 | A_95_P204147 | TA18002_4097 |
| 1111 | 14 | 6  | 432  | CGAGAGTTATAGTAGCTACTAGCT  | AATGAGAGTTGAGATGGAGTTGGAATAGTACTT    | 829 | A_95_P023241 | TA14334_4097 |
| 1112 | 14 | 7  | 747  | TCTTTTTGTAAGTGTCCAGTGGT   | GTTAATGAAATGAATTGTTGTGTTCTTGCTCCCA   | 831 | A_95_P220582 | DV160025     |
| 1119 | 14 | 14 | 395  | CATTTAAGTGGGGCGCTTAGAAGT  | CATGGATGTGGATTGAAGTCATTGGTTGCTTTG    | 845 | A_95_P133602 | TA13380_4097 |
| 1122 | 14 | 17 | 237  | GGATTAATGATTCTTTTCTTATGG  | GTTGGCTGGTTTGAAGGAAATGTGTTGTACAGT    | 851 | A_95_P142142 | EB445689     |
| 1126 | 14 | 21 | 303  | TTTGTGTGTTCAATTTGGTTGGG   | TCAACCGGATTTCTGTCACCGGAGAGCCTTCATT   | 859 | A_95_P100553 | BP535423     |
| 1127 | 14 | 22 | 492  | AAAGAAAAGAATCCCTGATTGGT   | CTTACTGCAATGCGTCTTGCTCTGCAGCTTATATC  | 861 | A_95_P147742 | EB643431     |
| 1129 | 14 | 24 | 798  | AGCTTCTGTAAGTCAAGGGAACT   | TCTCTCTCTCGAATGTGTCTACATCTCTTACAT    | 865 | A_95_P292893 | FG159469     |
| 1131 | 14 | 26 | 757  | AGAATAAACGCTATTTAAGAACAT  | GCTGTAAGTCAAGGGAACTTCTCTCTCGAATGTGT  | 869 | A_95_P123482 | TA13385_4097 |
| 1133 | 14 | 28 | 397  | CTTCTAAACCTTGCTTTGATGGT   | TTTACCAATGCTACTCAGGATTCAATTTAGCAA    | 873 | A_95_P147318 | EB451668     |
| 1143 | 14 | 38 | 567  | TGCACATTGTGTTTGTAAATATT   | GGACCCTAGGATGGGTATAGAATGGCTTAATAGT   | 893 | A_95_P035258 | BP128420     |
| 1150 | 14 | 45 | 828  | AGATCTGATGCTACAAAAACAGT   | CTGCTCAGAAGCTGACTCTGCTAAAGCTTTGACT   | 907 | A_95_P231484 | FG168673     |
| 1154 | 14 | 49 | 579  | TACAGAGTGCCTTGCTCCATT     | CATCCAGTCCCTGTCTTCTAATCTATTACGCAGATG | 915 | A_95_P211622 | TA19656_4097 |
| 1166 | 14 | 61 | 785  | TAGTAGCTTTGGAGGCCTATGAT   | CCATGATGCTTAAACTCGTGAAGAACTCCAGCC    | 939 | A_95_P222877 | DV160855     |
| 1168 | 14 | 63 | 830  | TTATTTTTCAGTAAGGCTACCG    | CTTGTTGGGTGACAAACACGTCTGCAAGTCATGGCT | 943 | A_95_P190282 | DW000482     |
| 1169 | 14 | 64 | 579  | CCCCAGACCCTACTGCTAGAATT   | ATACTGGGTTGTTGTTATTGTATATGTTTGAGGAA  | 945 | A_95_P133892 | EB435588     |
| 1171 | 14 | 66 | 596  | TTTCTGATTCTTCTCCGACTCGG   | CTTGATTATTCAGTCGTGACTCTATGGAGCTGTTG  | 949 | A_95_P261386 | BP131950     |
| 1177 | 14 | 72 | 250  | GCGGTCTCCCAAATTCAGAGAT    | TTATTTTCTGTTTCTTTTCTTTGCTTGTGCTACTA  | 961 | A_95_P210012 | EH622576     |
| 1179 | 14 | 74 | 755  | GTTTTATGGTTGAAGAGAAGAT    | GAGAGGAGATCTGATCTCTGCTTTTGAATAATAA   | 965 | A_95_P005176 | TA13310_4097 |
| 1182 | 14 | 77 | 727  | CCAGGAAAATGTTCTTTTGTGAT   | GAAATGCCCTATGCTTATGTTTGATATTATGACTC  | 971 | A_95_P185927 | TA14019_4097 |
| 1183 | 14 | 78 | 777  | ATTGGATCAGTTGAGGGAAGTCA   | ATTCTCAACTTGAAAGAGATGTCGAGCGTCTCCG   | 973 | A_95_P150662 | EB680800     |
| 1196 | 15 | 6  | 550  | GAGCCCTTCCGTCTCTGTTTCT    | TCTTGCTATCTTGTGGTTATTTTGGCTAATACCATA | 979 | A_95_P161672 | EH620337     |

|      |    |    |      |                                                             |      |                           |
|------|----|----|------|-------------------------------------------------------------|------|---------------------------|
| 1197 | 15 | 7  | 179  | CTACAAGCATAACACATCTTTAAGGTGCTCAAGCAAGTACATCCAAATATTGGGATCTC | 981  | A_95_P107987 CV018625     |
| 1198 | 15 | 8  | 374  | GTAGTTGCTAATAACTTGCCTGGAGATAATCTAATAATAGGAGTGATTTCCCTTATT   | 983  | A_95_P072015 BP525847     |
| 1200 | 15 | 10 | 659  | GTCAGGAAGGAGTGGTTTGAATATGAATTGTTTGAAATGTTATCAAAAAGAGCACA    | 987  | A_95_P273261 EB683099     |
| 1201 | 15 | 11 | 735  | GGCTATATTGTTCTTAGTGGTGCATCCATATAACATGTTTCTGAATCTTTAAGCTTCCT | 989  | A_95_P015766 TA12645_4097 |
| 1207 | 15 | 17 | 761  | ATGCCAATTCCTACAGTTCTTGCCACATTCCAGACATGTTTTTCAACACCTAAAAATCA | 1001 | A_95_P145362 EB449049     |
| 1209 | 15 | 19 | 931  | TGACCCGCGACAAGGATTCATTTACTTTATCTTTGAAAATAATGATGGCACTGGTGCT  | 1005 | A_95_P287008 EB680567     |
| 1213 | 15 | 23 | 568  | GAAGTTCCTCGGGTTTATACTTTATATATGAGGGACATGTATGTCTACCAGAATGTTTA | 1013 | A_95_P181402 TA12971_4097 |
| 1217 | 15 | 27 | 739  | GATTCATCTCCTCGTTACCACCTACTGCTTTACAAGATGAAAAGATGAGAAAATCT,   | 1021 | A_95_P295748 EB447898     |
| 1220 | 15 | 30 | 506  | ATTTTGAAAGGAAGTTTTGACTGATGTGCAATCTGAGTAACAAATTCTCCTGAGTTGT  | 1027 | A_95_P020906 TA18706_4097 |
| 1221 | 15 | 31 | 793  | GTGGTATTATAGAGATGAAATAGATGCTAGACATTTCTGCTCAGTGTGCATGCTGCG   | 1029 | A_95_P230794 FG142267     |
| 1231 | 15 | 41 | 104  | ATCACTGGACAAAATATGTTGAAAACCGAATTGCTGAGCTTGACGGAATTAGCGTGA   | 1049 | A_95_P104922 CV017224     |
| 1233 | 15 | 43 | 214  | TGAATCAAGAGTAGTCCAAAAGAACCATTTTTCCAGGACAAGTAAATCAGAATGATT   | 1053 | A_95_P222417 TA22028_4097 |
| 1234 | 15 | 44 | 800  | CAAAGTTGATTGCCGCAATAAAAATAATAGTGCTACTCCAAGATGAGAATGTTAAAA   | 1055 | A_95_P224272 EB451426     |
| 1236 | 15 | 46 | 634  | GATGGACTTTTTTCATTGCCTCTTAGCTGTTTCGCTTGTTTCTGTATACCATAATTGGT | 1059 | A_95_P203992 EB437103     |
| 1238 | 15 | 48 | 1711 | GTGCAAACCTCGATAGAAGTAAGATTTTCGTCGGTATAGGAGAAATATATCTGCATGT  | 1063 | A_95_P020731 AJ001770     |
| 1240 | 15 | 50 | 337  | ATATCCCTGCTAAATGGTAGAAAATCCAGTTCATGATTTTATAAAGGATCGGTCTAGT  | 1067 | A_95_P027626 BP532334     |
| 1243 | 15 | 53 | 742  | ATAGTGTATGGATTCTATATATCCTCTTGCAATGAATACATCATTCAATGTCTGGGC/  | 1073 | A_95_P228739 FG641655     |
| 1247 | 15 | 57 | 780  | TCGCAGCTAAATTTGAGCTTGACCAGAAGCTGTTCTTCTCCTAAGGAAGTTTGATC    | 1081 | A_95_P236759 EB438902     |
| 1251 | 15 | 61 | 874  | GTAGCGTTTGTTTCTACTAGTCCGGTCGCCTTAGGTTATTATTGATATTAATATTA    | 1089 | A_95_P237649 D63951       |
| 1252 | 15 | 62 | 955  | CGGGCAATGGAGATGATTATATTCATCAAATCCTTTTAGATGTCTCCATGCTTCTATT  | 1091 | A_95_P019756 TA15277_4097 |
| 1254 | 15 | 64 | 769  | ACTTCCTCTTTGGAACCTGTGAAGTATGTAGCAATAGGTGACAAAAGTGCTCCTGAA/  | 1095 | A_95_P183097 TA13379_4097 |
| 1263 | 15 | 73 | 785  | ACTTTTCTAGTCTCTTAAAGTAGCACGCCGTGCGTTTCTGGGACACTAGGTTAATTG   | 1113 | A_95_P135997 EB439557     |
| 1265 | 15 | 75 | 836  | GGTGCCATTCACACATTCCTGTACATAGAAAATCTAATTTTGAATGTAGATAAACTG   | 1117 | A_95_P026471 EB424860     |
| 1266 | 15 | 76 | 758  | CCCTGCATATGGTTGAGATGTAATAATGGATAGCGGAATATACTTAAAGATAATTGT,  | 1119 | A_95_P226524 TA16197_4097 |
| 1283 | 16 | 8  | 769  | GCTTACTGTCTTTCATTGTATACCAGAGACATACTGAGTTATGCAAATGAAAAGATTC  | 984  | A_95_P011941 DV158664     |
| 1284 | 16 | 9  | 873  | CACGTTGCAATGGTCAGTTGTTTGATATGACCTTAATTCCTCTCGTACTGTTATTTGA  | 986  | A_95_P297143 FG158759     |
| 1296 | 16 | 21 | 1116 | TACTCTCAATCTGGATATACTTCTCCTTGATAGCTTGTAAAGCTCCCATTCCTCAAA/  | 1010 | A_95_P012986 TA13713_4097 |
| 1307 | 16 | 32 | 736  | TTCTAAGGTTGGTGTCCAGAATGCGCTCCTCTGCATGTTGTTACAGATCAATGTGAG   | 1032 | A_95_P215462 EB441710     |
| 1308 | 16 | 33 | 834  | CTTCGGCTAATTAGCTTTAGTGACCTCATAGCGTTACATTATTCTTTGAGGCATAAAI  | 1034 | A_95_P009306 TA15339_4097 |
| 1309 | 16 | 34 | 428  | GCCAGTGAGAGTGTTCTCACCAACTATATTGTCCAGTTCAATAAAATCAAATTTTCAT  | 1036 | A_95_P097368 EH620951     |
| 1310 | 16 | 35 | 874  | ACTTCTGTCATGTTGAGCTTTCCCATGGTTTACTGGACTTGCTTAACACATGTTTATGG | 1038 | A_95_P267136 EB451747     |
| 1311 | 16 | 36 | 780  | ACTTTGACAGGAAAAACTATCACCTTGGAGGTTGAGAGTTCGGACACAATTGATAAC   | 1040 | A_95_P009637 EB451553     |
| 1316 | 16 | 41 | 261  | GAGGAAGCAATTGATACACAACCAGTTGTTCACTTAGAAAAGTTACTGAGTTATATTG  | 1050 | A_95_P221132 AM807541     |
| 1318 | 16 | 43 | 474  | GACTGCCCGTATGTGGTGAGTTATCTCTTTTCTACAAAAACACAAGAAAAAACAC/    | 1054 | A_95_P097913 BP534257     |

|      |    |    |      |                                                             |      |                           |
|------|----|----|------|-------------------------------------------------------------|------|---------------------------|
| 1321 | 16 | 46 | 897  | CTCTATATATAGAGACATGTTTGGGGAATTGCTATTTGTTACATCGACAATCGTAATG  | 1060 | A_95_P178282 TA12203_4097 |
| 1330 | 16 | 55 | 779  | TGATGCTGAGCTTAACTATGGATCCAAGAAGTGAACACTTTCCAGGGCAGAATATCC,  | 1078 | A_95_P158732 EH616597     |
| 1333 | 16 | 58 | 834  | TGGTGACCTTGGATTGTTTTGAATAGTTACTGAATATTTGTTCTTTATCCAAGTCCGC  | 1084 | A_95_P026426 DV159019     |
| 1337 | 16 | 62 | 354  | GATTTGCCTCCAGATGCTAGGCCTCTGCTAGTTTTCTAAACAAGAAAAGTGGAGCTC   | 1092 | A_95_P085270 BP529235     |
| 1339 | 16 | 64 | 687  | TGGGATTAGGAGTTAGAGGGGGAGATTCATTTGTTAGGTAGGTTTAGACATGATTG    | 1096 | A_95_P193372 TA15655_4097 |
| 1350 | 16 | 75 | 1590 | GCTGTTGCACAGTTCTGGAAACTAGTAGTTCTATTTTATTCTTACCTTTAATTTAGATC | 1118 | A_95_P190337 TA14994_4097 |
| 1356 | 16 | 81 | 1155 | CAAAAAGAAAAGATTAGCAGTATCTGAGGAACTCTGATCCTCTTCGTGCGCAGCC     | 1130 | A_95_P248977 Z99173       |
| 1366 | 17 | 6  | 759  | GTCTGCATATTGTGCTTTGGCTATTGTGTTTTATTGCCTTTCTTTATTATAGGAGCG,  | 1134 | A_95_P117527 DV160448     |
| 1367 | 17 | 7  | 779  | GTTCTATGTGTTCTGTCAAGGTTGGTTTTGTGCTGTTGTTGTCGTGATTTGTTATAGT  | 1136 | A_95_P148532 EB447962     |
| 1371 | 17 | 11 | 637  | GCTGATCATTTGTTTTGACCGTTGCTTTACAATTGTGAAAAAACTGTCTGCAAGTTCT  | 1144 | A_95_P187902 X83731       |
| 1373 | 17 | 13 | 0    | GTAATTATCGTTGGCGCCGAACAACATTACCTTTTCGTGGTCAGTGAAGTGGCAATTC  | 1148 | A_95_P316223 A_95_P316223 |
| 1375 | 17 | 15 | 2685 | TTGTACACATGTTGTTTCTATAGTTACTCGATTAGCTCAGGCACTTGGTGAATCAAAA. | 1152 | A_95_P251837 AJ344534     |
| 1376 | 17 | 16 | 235  | GGTACCTTAGTTATATAAACGGAAAAGCTGAAAAGCTACTATGAGGTTGATAGATGG   | 1154 | A_95_P089203 BP530396     |
| 1380 | 17 | 20 | 553  | AATGGCTGTGGAAGCACAAACGTATTTTCTTTTTCTGGATGTATCAGATAGTGGGTG   | 1162 | A_95_P205437 TA18288_4097 |
| 1387 | 17 | 27 | 0    | CATTAGCCTACTGAATATCCAAATGTAGTCTATTAGTGAACAAATGTCTGTACTGTA   | 1176 | A_95_P029521 A_95_P029521 |
| 1393 | 17 | 33 | 0    | AGTAGCTTTGGGTTTGGTGGTCGTCTTGGCAGTACATATTCAATCTTATTAAGCAAAA  | 1188 | A_95_P015856 A_95_P015856 |
| 1395 | 17 | 35 | 375  | TTAGCTGAAAAGTCACTGCAATTGTTGGGCTGACACACCTAGGTATTGGAGATG      | 1192 | A_95_P163957 EB424810     |
| 1396 | 17 | 36 | 800  | GTACAATTGTCTATACCTTTGTCAAGTTGAAGAAAAGAGAGTTTCTACCATTGCTGA   | 1194 | A_95_P272451 EB450147     |
| 1402 | 17 | 42 | 600  | AAATACTCATATCTTTGATGTTGTGGGAAGGGACAGTGGTGGTCTAGAAAAGGAA/    | 1206 | A_95_P208787 DV161692     |
| 1404 | 17 | 44 | 455  | GACATTGATTGAATAAACCTGGATATTGAGTTTGTATATCCACAGCCATTTGTAAGT   | 1210 | A_95_P075645 BP526781     |
| 1411 | 17 | 51 | 496  | TGGGGGTTGTAGAGACAATTCTTGTGAACCTAAATTTTATGGTGAATGCATTTTTCA   | 1223 | A_95_P143562 EB446820     |
| 1416 | 17 | 56 | 767  | CATTAAGCATACTGGAAGGTCAATTCCTTAAGGCAAGGTAGGACTCATAACGGGAC    | 1233 | A_95_P195332 TA16092_4097 |
| 1421 | 17 | 61 | 986  | CTTGCTTTCTGGTGTTTTGTGTCGCTTTTATCTTTCTAAAAGACCTGTTTTGCTACTGC | 1243 | A_95_P185087 TA13839_4097 |
| 1422 | 17 | 62 | 810  | CTCTATCCATAAACGTGTATCTTGTCAATGTTCCATGATTAATGGTAAGAGTTTCTC   | 1245 | A_95_P020111 EB437080     |
| 1427 | 17 | 67 | 1625 | CCTTCTAAGCTAAGGTTGTAAATGTTTTGGCTTCTTGTAGTTCTTTATCATGTGCTAT  | 1255 | A_95_P187747 TA14415_4097 |
| 1430 | 17 | 70 | 628  | AGGTTGAAAAGATTGATGCTGCAAAGCCTGTTGGAGAAGTATTTGAAGCAGTTAAAC   | 1260 | A_95_P058081 TA13632_4097 |
| 1431 | 17 | 71 | 952  | TCCGTTGTTTCAAATAAACATGTCTGTTGTGTGATTTCTTGCCCCACGGAGAATTGT   | 1262 | A_95_P177252 TA11924_4097 |
| 1435 | 17 | 75 | 656  | CGAGCACATTACAAATGATGAGGTCTTATCGTGCTACCGTGAACCAAATTATTCCTA   | 1270 | A_95_P040596 DQ156499     |
| 1455 | 18 | 10 | 724  | TTTTGCAGCTATTTATTATAGACCAAGATACATCTACTGCTAATTATGTCCCCTTCTG  | 1143 | A_95_P117032 DV159832     |
| 1456 | 18 | 11 | 782  | ACCTGCGTTACCAGCTGTTGAATGGATTTGACAGAGCTGTAATTAGTTACTTTGATGT  | 1145 | A_95_P030656 EB441893     |
| 1457 | 18 | 12 | 960  | CCGTTACAGGTTTCCCTGTCGAAAAATTATAAGCTGACAAGTTAATTTTTACATGTA   | 1147 | A_95_P222862 TA22124_4097 |
| 1460 | 18 | 15 | 298  | GGCCGAAGTCCCTTTCCATGTTATTTGTTTGTATCTTGTATCAGACAAACATGATA    | 1153 | A_95_P272056 EB447213     |
| 1464 | 18 | 19 | 252  | AGAAGGCTGACGAGTTGAAATCTAAAGGCGTGGACGAAATTTCTCTGGCATTAGCGT   | 1161 | A_95_P111412 FG163565     |
| 1477 | 18 | 32 | 239  | ATGATCCGTGAATGGCCACGCTATGTGAATGTTCTTTCTATTGCTAAGGCTATTG     | 1187 | A_95_P162257 EH621191     |

|      |    |    |      |                                                             |      |                           |
|------|----|----|------|-------------------------------------------------------------|------|---------------------------|
| 1480 | 18 | 35 | 409  | AAACACGGTTTAATGAATGTGACATCTGCTCATAGCAGCAGCAGAGGTATTACCTCA   | 1193 | A_95_P155047 FG624180     |
| 1482 | 18 | 37 | 860  | ATGGTGGAGCGCTTAAGAACTTTGAGCGCAAAGTCAAAGGACAGTTCATTGCAGT     | 1197 | A_95_P119137 DV162210     |
| 1483 | 18 | 38 | 799  | TTTACGCTCTTGTCAGACTATGATTCTTGTAGTAGTGGTTACCTTGAAGGTTAAGTTC  | 1199 | A_95_P185217 TA13865_4097 |
| 1495 | 18 | 50 | 1574 | CTTCTGCTGCTATGAAAGTTCAAACATTGCTTGTGTTGTGTGAAATCGCTTTATCTTTG | 1222 | A_95_P177047 TA11865_4097 |
| 1496 | 18 | 51 | 587  | GGCGGTTTTCATGCTCGTGCTTAATAAGTTGTAACCTGTATCATGACATTAACAATTT  | 1224 | A_95_P015446 TA13395_4097 |
| 1497 | 18 | 52 | 915  | GGGTAGCTGCTACCTTTTCAGAATGTGATAGTGTGCTTTTCTGTACTACATGGGGCT   | 1226 | A_95_P228949 EB424767     |
| 1500 | 18 | 55 | 429  | CTCTGTTCAAGTTCTTTCTCAATGTGGGCTATGTTTTGTTGGTGATATGCAAGATATG  | 1232 | A_95_P112117 CV020527     |
| 1508 | 18 | 63 | 244  | ATACAGTCTTTATCTGATTTGAGAGAGGGACCTAATAATGTTGTCTAAGGGTGAACA   | 1248 | A_95_P115457 DV157676     |
| 1511 | 18 | 66 | 824  | GCCTGTGGGGAAATTATGCGGCGGATGAATTCTGGATATGCTGTGACTTATGTGAA    | 1254 | A_95_P148747 EB678220     |
| 1512 | 18 | 67 | 194  | TCTTTTCCCATAGGATAAAAAGGCTTCCATTTGAGTATGAGAAGCTGCATTTCACTT   | 1256 | A_95_P092228 BP531705     |
| 1513 | 18 | 68 | 801  | GTTGATGTTATATTTTGGTTGTCACAGAACCAATATGGCCAATCCAGGGATTTTTGG   | 1258 | A_95_P244182 DV159141     |
| 1524 | 18 | 79 | 511  | TCCCTGTTGGTATGGTTTTGGTTTAGGAATCATTATGGATTTACTGCTATCTGAGAAA  | 1279 | A_95_P161502 EH619999     |
| 1536 | 19 | 6  | 534  | TAAGGTGGATCAGGAAGGTGCTGGCATATGTGTAGTAGGTGCTTAATGTTCTCATT    | 1287 | A_95_P099593 BP534984     |
| 1540 | 19 | 10 | 201  | AATTTGTTCAAGTCCAGCTTATATTGGCGGGCTAACCATTGCTCACTCACATACTAAA  | 1295 | A_95_P142792 EB448450     |
| 1543 | 19 | 13 | 894  | TGCCGGATGATATTTTGGTGCAAATATATGTGGTGGGCTTAATTTACAGTGTGTAGT   | 1301 | A_95_P017981 TC50995      |
| 1550 | 19 | 20 | 838  | ATTTCTTTGGGCCGAATCTTCATGCCTCTTCTGGATCTAATGCTTCTTCATCAGCAGCA | 1315 | A_95_P126742 EB426082     |
| 1553 | 19 | 23 | 765  | CAGCTGACCCACTATACTCTTGGTTCCTTCAATAGAAAACAACAATCATTATACAT    | 1321 | A_95_P179122 TA12432_4097 |
| 1566 | 19 | 36 | 491  | TCAATGCTAAAGAATTTTGGTGAGTAAACCAGATACCAGTTGATGGTCAAATTCGAT   | 1347 | A_95_P123572 DW003446     |
| 1575 | 19 | 45 | 378  | TAGTAGGATTTTCGGATTTTCACTATGGCTCTCGCTATTGCTACTCGTTGCTTTTGCC  | 1365 | A_95_P237209 TC72133      |
| 1579 | 19 | 49 | 659  | AAGAAGTTAGCGAAGCAGCACAAAGTTGATATAAACGAAGTGACTGGGACTGGGGC    | 1373 | A_95_P021456 TA16973_4097 |
| 1580 | 19 | 50 | 512  | TGATTATGCTTGGGTTGATGCAAATGAGAAAAACGCCGGATGAAAGCCCAGAAGG     | 1375 | A_95_P046926 BP131524     |
| 1588 | 19 | 58 | 832  | AGGTAATAGTCTTACAACCCATCTCGACCCGCTCGGGTGCTCGACATTCTTTTCATAT  | 1391 | A_95_P252894 FG158368     |
| 1589 | 19 | 59 | 766  | TAATGATAGGGACAAAAGTTTGTGACTTTGTGAAATTGCCATTGGATCTGCAGTGGA   | 1393 | A_95_P269676 EB425968     |
| 1590 | 19 | 60 | 852  | ATTTCAATGTCATGCAAACAAGCGATTGTCGATTCTGTGATGGTGTGAGCAGCAGCA   | 1395 | A_95_P311493 FG143338     |
| 1593 | 19 | 63 | 506  | ATGAAGGGTTTGGATTTGGTTAACACCGGTGGTCTCTGAATTAGATTCTGTAGATCA   | 1401 | A_95_P218522 TA21194_4097 |
| 1596 | 19 | 66 | 748  | ACTTTAATAACTTTGAAGCGGCATACACTTGTCTTACGGAAAAGAGATATAATGCC    | 1407 | A_95_P252699 EB425907     |
| 1597 | 19 | 67 | 185  | CGTAAACGCATCGTGGTGGCATCTGTATTTTTCATTGTCTTTTCATCATATTGTA     | 1409 | A_95_P031131 CV018094     |
| 1599 | 19 | 69 | 537  | CGTGACAGTTATCGTACTTGTATGTCCGTGCCAGAGATGCTATCCACAATAAGTTCT   | 1413 | A_95_P103187 CV016386     |
| 1600 | 19 | 70 | 821  | AAAGGGAGTCGATGAGTTTTCATTCTGTGTTCACTGTCAGTGGGAGAAGAGATGTCTC  | 1415 | A_95_P310308 FG166065     |
| 1601 | 19 | 71 | 301  | TTATCCCAACTTAATGTGGTCTGTGCCTCTGTCTTCTCAGTATCAGTGGCTTCTAGAC  | 1417 | A_95_P046951 BP131533     |
| 1602 | 19 | 72 | 760  | CGACCCGAATATATGCGGACAAAAGTTCTCAACTTTTGGGATCTTAATTTCTCCATG   | 1419 | A_95_P293828 EB679766     |
| 1603 | 19 | 73 | 782  | TACAGATGTTTCCACCAACAGTGAACCTGGGATACATCACTGGTCTACTAGAGACCGA  | 1421 | A_95_P231349 FG144474     |
| 1607 | 19 | 77 | 666  | TATGAGAATGACTGGGATGTCGTTAAAAGAGGTTGGGATGCTCAAGTCTTGGTGA     | 1429 | A_95_P136632 X70651       |
| 1608 | 19 | 78 | 847  | CCTCTTGAATTACCGGCATTCTGCAATGCAATCTAGTTTTCCATTCGTAATCATATTA  | 1431 | A_95_P124602 DV162646     |

|      |    |    |      |                                                              |      |                           |
|------|----|----|------|--------------------------------------------------------------|------|---------------------------|
| 1609 | 19 | 79 | 842  | AGTATATGTGCTGACGCTCAGACTCTTGACAGAGCAAGTATAGCTGTCTCAGCAAGC    | 1433 | A_95_P235359 FG157246     |
| 1612 | 19 | 82 | 681  | AGGCCGGTTGCTGTACGCTCCCTTTTAGCATTCTTTTAGCAATTTCTGGGAGCAAAA    | 1439 | A_95_P265546 BP531034     |
| 1620 | 20 | 5  | 201  | GAGTGCTAGTTATGTGAACCTCCTTCAATTTGTACTTGTCTCCATATATTGTGTGTA    | 1286 | A_95_P028816 TA22261_4097 |
| 1621 | 20 | 6  | 256  | CTGTGTCATATTGGTGATTTGTACCTTGACCGGATTACATTCTTTAGATTTCTTACTTG  | 1288 | A_95_P074425 BP526468     |
| 1625 | 20 | 10 | 319  | CTTCCAAAACGTTTGTGAGCAAAGTAGTCCCGTTTTCCAATTTGGCGTTATTGGCC     | 1296 | A_95_P126567 BP530134     |
| 1627 | 20 | 12 | 830  | CAAGATTA AATTGATACAACCTTCTAGCCTGTTTGGCCAAGCCTTTTTCTTGCCAGAA  | 1300 | A_95_P013401 TA13459_4097 |
| 1629 | 20 | 14 | 745  | CGCTGCATAATATGTACATTGGCTCTATTCATAATTCATATTGTATTGAGTTGATGGC   | 1304 | A_95_P013051 TA15815_4097 |
| 1630 | 20 | 15 | 707  | GCTGACGACGTTAACACTATACGTTGTGGAATATGAATCACTACTTGATCTGATGTT    | 1306 | A_95_P013171 TA13802_4097 |
| 1631 | 20 | 16 | 849  | TCTTGGCCACAAATGCAAGCATTGTAATTCATATAACACCCGCATGATTGGTACTGGC   | 1308 | A_95_P015471 EB432321     |
| 1632 | 20 | 17 | 1452 | TTTTAGCATGGGATGTAGCATTACTAATAGGAGTCTTGAATGCAATGGAATAAGGG     | 1310 | A_95_P176692 TA11722_4097 |
| 1634 | 20 | 19 | 736  | GTGAGAATATTTCTGAATGCGGCAAATTAGTGATTATTGGTTGTAATTGCTGGAGT     | 1314 | A_95_P267571 DV160713     |
| 1639 | 20 | 24 | 1133 | GACTTTGGGAGGTATCTTTACCAGGCTGATCAACAGGAATACCACCATACCTACAAA    | 1324 | A_95_P187002 TA14248_4097 |
| 1643 | 20 | 28 | 783  | CAAGGAGTTACAGGCTTCGGAAGGAACATTAGTGACTATTCAAGCATGCAATCACT     | 1332 | A_95_P150762 AM746200     |
| 1645 | 20 | 30 | 2611 | GGTGTTCGGGCTATTGCCTATTTATTGTAAGAATTCTGTATTGAACATAAGCAATGA    | 1336 | A_95_P250567 AB120519     |
| 1649 | 20 | 34 | 838  | AAAGAAGTTGGGATGGATTTGGGGTCATTGCTGAATTTTGACAGATGTGGTCATCGT    | 1344 | A_95_P230919 EB426067     |
| 1651 | 20 | 36 | 833  | CTGGGAATTTGTAATTTGGATCTACCTACTTGGGAGTTTAGTTAGTAATTTGTTATGG   | 1348 | A_95_P187082 EB452066     |
| 1654 | 20 | 39 | 426  | CTGCTCAAGTACAACGTACTGAACGAAGACGCGAAAGATAACATAAGAAATACTACA    | 1354 | A_95_P086663 BP529596     |
| 1657 | 20 | 42 | 654  | TACTCTTCCTTATTGTGACTGTTGGACGCTATAGCTATTCTATGAACTCGTTGTTTT    | 1360 | A_95_P124737 TA14667_4097 |
| 1658 | 20 | 43 | 762  | CTTACAGCAGGACTTCTATTTACCAGTCAAAGGAAAAGCCATAGGCAACGCCAGAAA    | 1362 | A_95_P146502 EB450560     |
| 1663 | 20 | 48 | 1048 | TTCCATACTTTGAACCTTCATCTGAATGATTTAATCAATCGTCCAAGTCTTTACTGTCC  | 1372 | A_95_P189327 TA14765_4097 |
| 1664 | 20 | 49 | 578  | ACTTTTTGATTGATCCACGAGTTTCTATTTAGTCTAGCAAAGCGCATGTTGAGGACT    | 1374 | A_95_P046336 BP131370     |
| 1665 | 20 | 50 | 232  | CCAGACGATAATAATTGTTATACTGAACCTTGGTATCTCTTAAGACTTGGTAAAGACTG  | 1376 | A_95_P100593 BP535445     |
| 1668 | 20 | 53 | 865  | TAACCATATGGTCTATGATTATTGCACAGACACTGCTAGGTTCCCTGTTGCTCCGTT    | 1382 | A_95_P248747 EB451610     |
| 1675 | 20 | 60 | 103  | GAGATTGCAGGGTGAGAAATTTTCATGTTTTGAAGTGGTTGCAATGATTTATCAACT    | 1396 | A_95_P164537 EH623777     |
| 1676 | 20 | 61 | 613  | AGCATATGTTTAATGCACGACATGTTATTA AACTTGCAGTCTGAATGGCTGTTGTTTT  | 1398 | A_95_P162847 EH621855     |
| 1686 | 20 | 71 | 716  | CAGTAATTGCTTTCTCAACTTTTGGAAAGGCTTAGAATAGTTTCTACAAATCCTTTCCG  | 1418 | A_95_P273066 EB681278     |
| 1688 | 20 | 73 | 430  | TTTTAGGAGTCTTTATGTTGTGCCCTGGAAGAAACCTCTTTTACACTAGTGAATGCT    | 1422 | A_95_P120937 FG621759     |
| 1690 | 20 | 75 | 620  | TGGCAAAAAGCTGGTGAGAGAAGGAAGGATAAATTTATGTAGTTCTACTTTTGATGG    | 1426 | A_95_P291608 DW004941     |
| 1693 | 20 | 78 | 274  | GTCATGTTTGATCAAGTCAACTTGTAGGATGTAGGACACTGGAAATGTTAATTTGAC    | 1432 | A_95_P106777 CV018053     |
| 1695 | 20 | 80 | 991  | TGAACAAGGTTGGTGGTTTTCTGCAGAGAATGGATCTGGCTCGCAAGTATGCTTTTG    | 1436 | A_95_P179227 TA12454_4097 |
| 1706 | 21 | 6  | 812  | ATGGGGGTTAAGTCTTTGAATAAGAAGTTTGTGTTTTGCTCCCGGCTCGCGAAAAC     | 1445 | A_95_P013261 TA13424_4097 |
| 1710 | 21 | 10 | 257  | TTGCTCCTTCACTTGCCTCCTCCGTTGAGTCCGTAAAAA AACTCTTAAAGGTCCCTGTT | 1453 | A_95_P156737 EH614763     |
| 1711 | 21 | 11 | 824  | ATTTGGCTCATTTGCCCTT CAGCTGGTACCGATATCTACTTCAACTCTGATGTTGGA   | 1455 | A_95_P251017 AY286010     |
| 1712 | 21 | 12 | 316  | TGTGTGCATCCTTTCTGTACTTCAACAGGCTCTAATGTACTTCTTTATACTAAGAAAG   | 1457 | A_95_P108027 CV018637     |

|      |    |    |      |                                                              |      |                           |
|------|----|----|------|--------------------------------------------------------------|------|---------------------------|
| 1714 | 21 | 14 | 1125 | TGTGAGAAGGTTTGTGTTTTTGGCACTCTGTTTTGATGTAAAGAATTACCCATGGA     | 1461 | A_95_P198282 TA16745_4097 |
| 1715 | 21 | 15 | 840  | ATGTATATTGCACGCTTCTGCTCAAAGTTGTGTCATGGAGCATGGCAGGTACACAGT/   | 1463 | A_95_P311048 FG157628     |
| 1717 | 21 | 17 | 732  | TGGGGGTGCGGTTGGGGTGATCTCTGCATTGATGGTTGTTGAAATCAATAATGTGA/    | 1467 | A_95_P194747 DW000246     |
| 1718 | 21 | 18 | 444  | TGGGGCCTTATCTTTACTTGGTGTTCGATCATTCTCAAATACAGGAGTTCCTCCTTA    | 1469 | A_95_P086155 BP529465     |
| 1721 | 21 | 21 | 366  | GCACGGTTATGGAAGTTGCAAAGGAGGTACATTTGTTATGCAATTGGTGGTTTCTTA.   | 1475 | A_95_P052831 BP133024     |
| 1724 | 21 | 24 | 830  | ATTCATTTTTGATATCATATTCGCTGAAGAGATGGCTTGATGTCCTTCTCGCATGGAT   | 1481 | A_95_P296388 EB451875     |
| 1733 | 21 | 33 | 953  | CAGGAGCTAATTGTGTGATACATAACAGTGTTGTTACTTACTAGTATTCTTCTGTTC    | 1499 | A_95_P197782 TA16639_4097 |
| 1734 | 21 | 34 | 568  | CCAAGGAAGTTACGAAGATAAGCAATTATGGCATATCCGTCTGACTGAACTGCACTG    | 1501 | A_95_P134237 DV159211     |
| 1735 | 21 | 35 | 555  | CGTTGTAATAAATGTTGTCAACGTCCCGCAAGTAGTTAAAGGCATCAATATGATTAT    | 1503 | A_95_P065490 BP136345     |
| 1737 | 21 | 37 | 479  | GCTGGTGTTAGTCTATCATCTCTTTTTGTATGATACTGTTGAGTGTCTGGGACATT     | 1507 | A_95_P116377 EB678172     |
| 1738 | 21 | 38 | 694  | AGAGGGCTACGCTAGGTAGGTGCTAGTTTTCTGTTTTGTTTTGTCACTGACAGATA     | 1509 | A_95_P146202 EB450178     |
| 1739 | 21 | 39 | 895  | CAGCGTCAGATTTTCTGCCTTCAATTTGAGACTGCTTAGAATTGTTAGAATATAACA.   | 1511 | A_95_P183797 DV157991     |
| 1741 | 21 | 41 | 798  | AATGCCCACTGACTGCGTACAAGCAATAAATGTACCTCTACGTCTTTACAACAATAAC   | 1515 | A_95_P116252 DV158875     |
| 1744 | 21 | 44 | 495  | CCTAAGGGATGACTGGAACAATTTTTCCAGGCCCTTTTGTCTCCTAAACATCCAGT     | 1520 | A_95_P208992 TA19092_4097 |
| 1745 | 21 | 45 | 487  | TAAGCTGCCAATCAGTAATGAGTTCATTTGTGTGTATGTTGTGCTTGAATTAECTA.    | 1522 | A_95_P274063 AM812698     |
| 1748 | 21 | 48 | 855  | TGAGCCTGTCCAGAACTAATCTCCTCCTTGTCTTTCCTTGTCTGTTCAATTGTAACG    | 1528 | A_95_P008501 EB438265     |
| 1754 | 21 | 54 | 696  | ATGGCAAGGCCGAGCTATACATTTTATGATTTACCAATATATCCTCATGAATCTGTT    | 1540 | A_95_P132852 EB433640     |
| 1755 | 21 | 55 | 759  | CTGTTTCTGCACACACTACGTAAATGTCTTACATGTTTATGATTTTATTGGTTCTGT    | 1542 | A_95_P191267 TA15195_4097 |
| 1757 | 21 | 57 | 491  | GTGTGTTTTGCTAAAACAGAAAACACGATATTGTCGTGAATTTGCGTCTAAATGATA    | 1546 | A_95_P247577 FG640440     |
| 1765 | 21 | 65 | 614  | CAGCGAACCACTTACAGTGTCTGTAATTCGAATTCAGACATAGATTTTGTAGTAAT     | 1562 | A_95_P203967 TA17966_4097 |
| 1770 | 21 | 70 | 826  | TGAAAGAAATAAAAAATGGCCGCTTGTCTATGTTGCTGTTAGGCTTTTTATGTCC/     | 1572 | A_95_P217102 EB429719     |
| 1772 | 21 | 72 | 1728 | CTTCTGCATAAATGTGTTATCATAAGGAAGGATTTGCCAAGATTATGTGGCAGCTTTA   | 1576 | A_95_P105667 TA12833_4097 |
| 1773 | 21 | 73 | 409  | TGACCATATCTAAGGTAAGTACTGTTGGTACATCTGGTCTCTGTTGAAAAGATTCCAAAT | 1578 | A_95_P102667 CV016132     |
| 1775 | 21 | 75 | 799  | ATGAGGGAAAGTGCATCTTGGACATGGTATTATAAAGTATTTTTGTATTCTAGACGG    | 1582 | A_95_P224422 EB449164     |
| 1795 | 22 | 10 | 740  | AACCATAGATTTGTGGATGGGGAAACTGTTGTAGTTTGGAAACTTTGGTTCCGTTAC/   | 1454 | A_95_P147367 EB451746     |
| 1801 | 22 | 16 | 495  | TTGCTGCCCTACTGTCACTTGCTTATTGTAATTAATAATTCTTCTTTGGGTTGACT     | 1466 | A_95_P190847 FS417555     |
| 1803 | 22 | 18 | 452  | TGTTTAGCTGATCGTTCCTGTAATTAGGTACATAAACGCTTGCTAAAATATTCCGTT    | 1470 | A_95_P143682 EB446921     |
| 1807 | 22 | 22 | 457  | TATACAAGTTCCTCCTCGTAACAGGGCACATCTTTCATATACTATTTGTCAAGTTGTT   | 1478 | A_95_P184262 TA13652_4097 |
| 1810 | 22 | 25 | 787  | AGGATGATGTGTTGATTGAACCTTCTTCTGGATATGTAGTTTGTATTTCAACCTCG/    | 1484 | A_95_P018891 TA15828_4097 |
| 1812 | 22 | 27 | 967  | GGGATATGATAGAATCCAAACGAATCCAATCCCTGCAAAAATATTTACTTTGGTTGAC   | 1488 | A_95_P216792 TA20781_4097 |
| 1816 | 22 | 31 | 828  | CCAAGACACCCTTTTCAATGCGATGTCAGATTTGATTATTATCAGATCAAACTAC      | 1496 | A_95_P291938 EB425600     |
| 1817 | 22 | 32 | 757  | ACTCCTGGAAGCTAAACGGATGGAAGAAGAGAATGAAAGAAAACGCATAATAGCAT     | 1498 | A_95_P016556 FG135238     |
| 1818 | 22 | 33 | 766  | AAATGGTTGAAAGTTGGAGGCTACATATTTTTCAGAGAGTCATGCTTCCATCAATCAC   | 1500 | A_95_P235519 EB441159     |
| 1822 | 22 | 37 | 711  | GCTGCTAGAATAGTTCTCTGTTCTGTATTTTTGTGTGCAGTATTGCTGTGTATATTAGT  | 1508 | A_95_P265721 DW005248     |

|      |    |    |      |                                                             |      |                           |
|------|----|----|------|-------------------------------------------------------------|------|---------------------------|
| 1825 | 22 | 40 | 652  | TGTGTCTGATTTGAGAACCATGGGTTCTGACAGCTAAGTGCATCTGTATGGTAGGCA   | 1514 | A_95_P284768 BP132833     |
| 1826 | 22 | 41 | 657  | GCGGGTTTGGACCTGTTGCTTTAACTATGTAACAATGTATCTGTATGCTATAAATTA   | 1516 | A_95_P306593 FG638062     |
| 1828 | 22 | 43 | 0    | ATAGGATTCGAGACACAGCAGAGCAGTGAAGAACAAGCAGTTGACTAACCAGAT      | 1519 | A_95_P292743 A_95_P292743 |
| 1829 | 22 | 44 | 813  | GCAAAGCAAAAGCTAAAGTTGAAGGCAATATCTTTGGGGATTGTAATATCTTTATTG   | 1521 | A_95_P258226 DV999323     |
| 1831 | 22 | 46 | 792  | AGATTCTCTGGGCTATGCTGCTTTGACACTCAAGTATGCAAATATCATCATACTATA   | 1525 | A_95_P127147 EB426607     |
| 1832 | 22 | 47 | 1230 | TCCAAATGTTTGCCAAATTTGTTGGACAATGAAAGAAATGCAGAAGAATGGATCTTG   | 1527 | A_95_P185567 TA13943_4097 |
| 1837 | 22 | 52 | 572  | GTCGGTCTATGTTCAAGTGTACGAGCGATCATTTTGGTCTTATAGGCCCGTATGTCATA | 1537 | A_95_P268847 EB683229     |
| 1838 | 22 | 53 | 720  | TGCACATATTTGACATTCTTTGTTAATCACCTTTCTGGGAGGAACAATGCTTCAGTTA  | 1539 | A_95_P140782 EB444622     |
| 1843 | 22 | 58 | 1036 | GTTTGTCTCTGCTTCAGCATCCATGATAAAGAAATATCAGGATTTTCTTTTGTATTG   | 1549 | A_95_P031851 AB017693     |
| 1846 | 22 | 61 | 624  | GGAGATTCAGAGCTGGAATTATGTGATATATTGTATGGTGTAGTTTTCTAGATTGT    | 1555 | A_95_P200022 EB680907     |
| 1847 | 22 | 62 | 1481 | CCGAAATTTATTTCTGATGTACCCGGACACAAACAACCTCTTTTGTCTATTGTGTTCA  | 1557 | A_95_P026906 TA11920_4097 |
| 1852 | 22 | 67 | 641  | TGGTTTTGTTTCATGCTATTTCTAGGTTGACCTGTTGTTATCAATGCTACTGGAATTTG | 1567 | A_95_P016481 EH616635     |
| 1855 | 22 | 70 | 886  | AAAGACTAGCTATCTCTCGGAGCTCAAGTCTGGCAAAGAGGTCATTGTGGTTGATCA   | 1573 | A_95_P267806 EB680163     |
| 1856 | 22 | 71 | 868  | CCGGGATTTAGATGCTTGCTCTGCTGAATAAATTTGTTGTTGTGTTCTTAATAATGCA  | 1575 | A_95_P010046 DV162733     |
| 1860 | 22 | 75 | 386  | CCCATTCTACCACAAGCTTTTAATAATATGGCCGTGATCTGTCATTACGTGCGACTA   | 1583 | A_95_P178507 TA12267_4097 |
| 1864 | 22 | 79 | 826  | AGAGGTTCTCTTTGTTTTGAGCGCAAAAATTGACATGGCAGTTGTACTTCTCCCTA    | 1590 | A_95_P247167 EB425325     |
| 1865 | 22 | 80 | 719  | CCATTGTTTGAAGCTAATATGGTCTGTTCTGTTGTTGCCTTACCGGAAATCCGGTCT   | 1592 | A_95_P136702 EB440471     |
| 1866 | 22 | 81 | 881  | AGCAGATGTTGTCACAGCCTTGTCTTACCTTGTGCACAAAGATTTGACAGTGATAG    | 1594 | A_95_P230109 EB426242     |
| 1867 | 22 | 82 | 254  | TATGCACCCTTAGCTTAGATGTATTTGTATGCCTGTTAAGTCGTTACAACCTTCCAA   | 1596 | A_95_P110177 CV019613     |
| 1875 | 23 | 5  | 634  | TCAAGTCCAATGATATCATTAAGACGCTTTGTTCCATAATTTGAATATGTAGCTCTC   | 1600 | A_95_P284288 EB430965     |
| 1877 | 23 | 7  | 839  | CTTGATAGAATCTCCCCTCCACTGAGCATATGTCGTTACTTCTATGTAGTCTCTTCTA  | 1604 | A_95_P224477 FG148796     |
| 1879 | 23 | 9  | 584  | CCTGTATTTGACTTCTGATTCTTGTGTTGTATCATAATGTACTAGTCAATGGACTCCA  | 1608 | A_95_P211872 TA19710_4097 |
| 1881 | 23 | 11 | 363  | GGTTGTCTGAAAGGAGCATATATATAAAATTTGAACCCTTGTAGTCATGTTTGTCCC   | 1612 | A_95_P204082 TA17989_4097 |
| 1884 | 23 | 14 | 299  | GTAAGCTTGCCATTGACAATCTTGTACGGTTAATTAGATTTTGAATCCGTACAAGAT   | 1618 | A_95_P004281 FS432984     |
| 1887 | 23 | 17 | 609  | ACCTATAACTGTGTATAGTTCAAGAAAATCAAATGCCAGGATCTTCTGGCAACTGATC  | 1624 | A_95_P095078 FG641869     |
| 1888 | 23 | 18 | 425  | GCTCCGGTTCGTCGGTCTTCTTTTGTGTTTGTATCCAGTTTTCTCTCAACCATTAAGG  | 1626 | A_95_P037273 BP128961     |
| 1889 | 23 | 19 | 609  | CCGAAAAGAGGTCAAATAATGTATTGTGATGTGGCTACAGAACTTTTTCTTTACAA    | 1628 | A_95_P262381 FG643390     |
| 1897 | 23 | 27 | 119  | ACTTTTGTATGATTTTGTCTGCTGGATCTAATCTCCACCTAGTTGATTTCTTTGACCCG | 1644 | A_95_P212787 FS391062     |
| 1899 | 23 | 29 | 2235 | CATTGTTCTTTTTTGTTCATAAAAGTGGCAATTTAGTTTGTGCTTGAGGTCGTCTGT   | 1648 | A_95_P129997 AB110952     |
| 1903 | 23 | 33 | 375  | GAGCTCTACATTTGCAGTGATAAGAGGAAGAGAATTATGGAGATGTCTTTGAAGA     | 1656 | A_95_P092523 BP531842     |
| 1904 | 23 | 34 | 774  | TTGTGTTACATGTTCTTGATGTTGATTCTTGGGGTTTGTATGCGAAATTGGCAGG     | 1658 | A_95_P014281 EB680757     |
| 1906 | 23 | 36 | 958  | GTTAGTCCCGGTCATTGATGTGATTTTTATTAATGAAGCTATGAAGTACTAGTTCTTC  | 1662 | A_95_P180877 TA12846_4097 |
| 1910 | 23 | 40 | 464  | AACCCTCTGTGAAACAGCATAGTCTATAAACTGCTGATGTCAAAAATGCTTTTGTACT  | 1670 | A_95_P304723 AM799542     |
| 1911 | 23 | 41 | 842  | ATGAACCCTCATTAGATAACTGTTTTATTTCAACTAGCTATGATCCCAACTCACTTT   | 1672 | A_95_P225048 EB446006     |

|      |    |    |      |                                                             |      |                           |
|------|----|----|------|-------------------------------------------------------------|------|---------------------------|
| 1923 | 23 | 53 | 384  | ATTCCGTTTTCCAGTTGAATGGGTTGGGTTTCGATCCCAATTCGGGTTCTCCTTGTGT  | 1696 | A_95_P085140 BP529205     |
| 1931 | 23 | 61 | 814  | ATAGGCAGGTAACACGTGGAAGGAAACGACATGATTTAAGGTCCCCAGTCATGATC    | 1712 | A_95_P261351 EB445678     |
| 1933 | 23 | 63 | 294  | GGTGCTGGTGGATATCTGGAATTAGAGTTTTTAAATATTTTCATCTCACTTCAGCTAAA | 1716 | A_95_P106967 DW003761     |
| 1934 | 23 | 64 | 770  | ACCACTGGTGTGAACAAGTTTCAGAATTTGCATCTAATGTTTAGTTCAACTGTTTGG   | 1718 | A_95_P005171 TA11929_4097 |
| 1935 | 23 | 65 | 551  | GTTGAATCTGAGTAACAATTCTCCTGAGTTGTCTTTCAATCTTATTCTCTATGGACTTT | 1720 | A_95_P001281 TA16836_4097 |
| 1936 | 23 | 66 | 573  | CCTTGAAAATTGAGAGTGGTACAATTGTGCCGTAGACGCGGAAAAGAAACAATAAG    | 1722 | A_95_P222027 TA21943_4097 |
| 1939 | 23 | 69 | 383  | GTATGTGTTATCATGATCCTGAACTTAAATGAAATGGGCTTTAACTAACTCTATAAC   | 1728 | A_95_P114737 TA12197_4097 |
| 1942 | 23 | 72 | 1207 | ATCCAAGTTGATTGATTCCCTATCACTAGGACAGTCACTGCTGTCAACTTCTATTGCC  | 1733 | A_95_P183867 TA13554_4097 |
| 1943 | 23 | 73 | 440  | AAGATGACAAGATTATAGCAGTATGTGCTGATGATCCCGAGTTCGCCCACTACTCAG   | 1735 | A_95_P147052 EB425859     |
| 1944 | 23 | 74 | 821  | GTGTATTGTTGTGGCCCTTTGCTTCTGCAAAAATGTGTTATCATAAGGAAGGATTTT   | 1737 | A_95_P018206 TA12832_4097 |
| 1946 | 23 | 76 | 820  | CTCTCCAGCTCCCGTGCTTTGGTGCTCTTTATATCTTTTGCAAGTGTATGTTAGCATCA | 1741 | A_95_P285678 FG141850     |
| 1953 | 23 | 83 | 776  | GTAGTGATAGTCTGTGAAGTGAGGATATATCAAGTTGCTATGTTGGCTTGGAAATA    | 1755 | A_95_P116242 DV158853     |
| 1959 | 24 | 4  | 413  | ACATCCCATGAGTGCTTGCTTCTCCTTATGAACAAGCACTTACAAGGGAGGATTCAA   | 1599 | A_95_P181177 EB679951     |
| 1960 | 24 | 5  | 343  | GGGGGACCACCCTCTAGTAGGAGATATGGCATAATGAAAATAGAATAGAGGAATT     | 1601 | A_95_P129167 EB428907     |
| 1963 | 24 | 8  | 455  | GTTTTCTAACGATATCCATTACAGGAATTGTTTGTACTTCTTATCCCTCCCTTCTGC   | 1607 | A_95_P089858 BP530689     |
| 1966 | 24 | 11 | 279  | GTAGCCATTATTAACAAGTCACTCTTGCATTCTAATTGTAGGAGGGAAGTACAATAA   | 1613 | A_95_P154072 EB684240     |
| 1975 | 24 | 20 | 1992 | TTGGACTTAAAATTGTGCCCGATTTCTGTTGCTGCTTAATGAATTTGTTGATCCTTT   | 1631 | A_95_P016431 TA13483_4097 |
| 1976 | 24 | 21 | 389  | GGTCGCCCTGTTTCTAGTGTGTTGGATATCTTGAGCCTTACAAGATAAAAAATGACT   | 1633 | A_95_P159807 EH618284     |
| 1981 | 24 | 26 | 1556 | CATGCTGATGCTGCAGTTCACCTGAAGATGACAATAAGATGTTTGTAGTATTTGGTT   | 1643 | A_95_P012346 TA13959_4097 |
| 1982 | 24 | 27 | 422  | TCACATTAGTGGTCTTGTTGCTGCTCAGGAAGTGTGCGGATCCGTTTGAATATTGTGAC | 1645 | A_95_P004841 DV160254     |
| 1983 | 24 | 28 | 844  | TATTTTGGTTGTGCGAAGTTATTATCTAGCATTTCCATTTTGCCTGAGCAGCTCTGTGC | 1647 | A_95_P010726 EB449682     |
| 1984 | 24 | 29 | 639  | AGCCAAAAGTATGTCCAAATTTGCATACATCCATATCCCTGTACGCAAGAAGCTA     | 1649 | A_95_P067730 BP136949     |
| 1987 | 24 | 32 | 690  | GAACGTCTAATGATAGATCATTGCGGTCTCTACTGGACCAGTTCCTCTTTTTAGTCAG  | 1655 | A_95_P134182 EB436164     |
| 1989 | 24 | 34 | 788  | GACCTACTGGCAAGATGCCTCCAACGGGTCTTTGTTAAATGAATAGCTTTTGTGTTGC  | 1659 | A_95_P289688 DV160487     |
| 2001 | 24 | 46 | 765  | CTGTTCTTGTCTCGGAGCACATTGTAATCTTTAAGGAATTGTTTCATAGTCTACAAAA  | 1683 | A_95_P293438 EB435226     |
| 2002 | 24 | 47 | 434  | TATGCGACCAAGAATAATCCCATATATAGTCACTACCCCTTGAACGAGCCCCGTGTT   | 1685 | A_95_P050266 BP132354     |
| 2003 | 24 | 48 | 849  | TGCGAGTTTGTACGATCATCCGACATGATCAGAATAATAAAGGTTGGGGTCCGC      | 1687 | A_95_P293188 FG155602     |
| 2004 | 24 | 49 | 760  | ATTTTGCAACGTGCAAAACCATTGAGTCAAATACCCCTTGTGCGGCCACTGTTTACTC  | 1689 | A_95_P013546 EB677742     |
| 2011 | 24 | 56 | 391  | TTTCATGGGAATCTCGTTTCATATCTTCGGCTGTTTTTCATGTGTAGCTGTAATTCAAA | 1703 | A_95_P133402 EB434846     |
| 2012 | 24 | 57 | 726  | CTTGATTTGTCAATTTGAATAAAAAGAGAATCTGTATCCATCACAGCAAGCTAGAGG   | 1705 | A_95_P124872 DW004680     |
| 2013 | 24 | 58 | 806  | CTTTTTCTGCTGTCTGGCTCAAATCACAATCTTTATAGAATGCATATAAGGAAATAG   | 1707 | A_95_P013136 TA13402_4097 |
| 2015 | 24 | 60 | 375  | GTAAGTGGTTTGTGATTGTGACCTTTTCATCAATAAAATGATGAAGAAGCTTCATTGA  | 1711 | A_95_P090638 BP531039     |
| 2016 | 24 | 61 | 608  | GTATTGGTTCGACAGGTCAAAGAGATGCTCCAGGAAAGGATTTTAAAGGGAGAAAG    | 1713 | A_95_P148262 FG138767     |
| 2019 | 24 | 64 | 583  | GTAGTGGCTGAAATAGTCTAGTATGAGACAGAAGTAGTTGGTTCTTGAATGTAAATC   | 1719 | A_95_P212312 TA19806_4097 |



|      |    |    |      |                                                              |      |                           |
|------|----|----|------|--------------------------------------------------------------|------|---------------------------|
| 2022 | 24 | 67 | 1106 | CTGATCGGATGTCCCTTTCATAAATATTTTCTGTCTGTTTATCTTGCTTTTGGATTGCGT | 1725 | A_95_P194612 TA15934_4097 |
| 2027 | 24 | 72 | 1040 | TTTCTGATGAGTCACCGAGGGACTGAGTTTGTTTCAGACATTGGCATCAGAATTTCA/   | 1734 | A_95_P161942 TA14378_4097 |
| 2034 | 24 | 79 | 1136 | GCGGGCTGGTAGGGAAAAATGACTTTTCTAACAGAAATTATTTATTAGTGTATACA     | 1748 | A_95_P193757 TA15739_4097 |
| 2036 | 24 | 81 | 124  | ATGAATAAAACATTTATAGGGCGTTCTTCAGAGCTTGAATGGTTAAGTCTTTTTTGT    | 1752 | A_95_P134657 EB437242     |
| 2037 | 24 | 82 | 668  | CTCGACAGTGGGACTCCTGCTTATATTGCTCCGGAGGTTTTCTAAAGAAAGAGTTA     | 1754 | A_95_P157827 EH615857     |
| 2043 | 25 | 3  | 962  | CTTTGTGGGTGGTTTGTATTTGCGCCCAATATAGAGAATCGTATTTAACTTTAGTT/    | 1756 | A_95_P001921 AB029614     |
| 2045 | 25 | 5  | 179  | TGGCCGCCATTCTCGTTAAATTTGCGTCGGTGTTCCTTACATTTGGTATGTCAATGGT/  | 1760 | A_95_P112832 CV020871     |
| 2052 | 25 | 12 | 1735 | GCATGTGCCTAAAAGTTTTGCTCGTTAGAGTTATTTTAGCCTTGGTAAATGATTTGTA/  | 1774 | A_95_P003346 Y13465       |
| 2053 | 25 | 13 | 815  | ACTTCGATTATGTCTGTTATGTGTTGTTCTGATTACCTGGTATTCTATCCGATATTTCA  | 1776 | A_95_P135867 DV160063     |
| 2055 | 25 | 15 | 599  | TGAATTGCTGCCAACGCAAACTAAACAATTTGAATTATGCTACTCCCATCTCTTTTT    | 1780 | A_95_P043741 BP130693     |
| 2061 | 25 | 21 | 1124 | GGAGGTGGAGGTGCAACTTTTTCTGTTTCTTTTCTTTTCTTTTCTTTTGTGATTGAATG/ | 1791 | A_95_P027921 TA15259_4097 |
| 2062 | 25 | 22 | 630  | GCTATCGCTGTTATCGATTCCGGTATTATGAGAAGATGAACTTCAAAGCTAATAAATCA  | 1793 | A_95_P003801 TA20677_4097 |
| 2064 | 25 | 24 | 729  | GATGTTCTTTTTCTTATGCTCGTGATAATGTGGGGAGACATTTGGATGCAACATATG    | 1797 | A_95_P207742 DW000809     |
| 2067 | 25 | 27 | 91   | TTCTCCCGCAAATCCAACAGTATTTAGTAGAAGCTTGAATGGATAATATGCTTAATTG   | 1803 | A_95_P103242 CV016417     |
| 2068 | 25 | 28 | 501  | GCTAAGGATTATTGCTGCCATTTTAATGGAGGTTTTTCATTAGCAGAAAAGCTTAGTTT  | 1805 | A_95_P269511 AM789132     |
| 2070 | 25 | 30 | 528  | TTTTCTCTGCTAACCGAATCTGTACAGAGACCACCTTATCTCTTTATGTTACAGATG    | 1808 | A_95_P074455 BP526474     |
| 2073 | 25 | 33 | 468  | GATGAAGCTTGGTGGTTAGTCTTTGTAATACTTCGGCAAGTGAAGTGTATGCTCTG/    | 1814 | A_95_P073815 BP526307     |
| 2080 | 25 | 40 | 1311 | CACAGGTCTCAAGTATGTGTGCAGGGATATTTAACTAAATACAAACGTTTTCTTTGCA   | 1828 | A_95_P021576 TA15994_4097 |
| 2081 | 25 | 41 | 1310 | GGAGAAACTGTTTCATAAACAGCAGCTAGATATTGTTCAACATCTTTTACTGTGATG    | 1830 | A_95_P198507 TA16791_4097 |
| 2084 | 25 | 44 | 1023 | AGCAAAGAAATTCCTTATGGCTGGTGGTATGGTATTGTAGGCCACTTGGAAACATGT    | 1836 | A_95_P216182 TA20649_4097 |
| 2086 | 25 | 46 | 956  | GTGATGGAGAATCCTTCTTTAAGTGAGATGGATAATTGAGATTCATCTGTTGACTAT    | 1840 | A_95_P287948 TA15643_4097 |
| 2087 | 25 | 47 | 532  | TCCAGGATTAAGTGGAATTTACCAAAGTACTTGGTTGAATAAGGACGGAAAAGTA/     | 1842 | A_95_P020017 CV021245     |
| 2092 | 25 | 52 | 789  | TATAACATTCAAAAAGATTTGCCTTGCACTGCTGTGTGACTGGTGTGCCTCCTGCAC    | 1852 | A_95_P310938 TC50163      |
| 2093 | 25 | 53 | 365  | GGGCTGGGCATATATCGGGTAAAACCGATAAACCGGACCGTTAATTGTTAATGGG/     | 1854 | A_95_P040811 BP129930     |
| 2095 | 25 | 55 | 154  | CTTGCTTCCTTTCAATTTGATTTTGGTGTTCAAAAATGGAGATTGATTTGATGATC     | 1858 | A_95_P091208 BP531254     |
| 2102 | 25 | 62 | 854  | ATTCTCTGTGAGTGCGAGTGGTTTGGTTCTAAATTTTGAAGGCATGATTGCAAGTTG/   | 1872 | A_95_P162127 TA11944_4097 |
| 2107 | 25 | 67 | 781  | TCTCAAGATCGTGTATGGTCTGGGTCTCCATTTTCTTTTGTATTTGCTGCTGTGTTTT   | 1882 | A_95_P217947 EH621825     |
| 2110 | 25 | 70 | 375  | GCTGCTCTGGTCTCTTTTGTGCTCCTTGAGCTATTAAACTATTATGGAGTATCATA     | 1888 | A_95_P092738 BP531949     |
| 2111 | 25 | 71 | 125  | TGACTTGTATAGTCATCAGTTGGCTAGCGACGGATTAAGTGTTTTTGTGGATCTTTAC   | 1890 | A_95_P119677 DV999151     |
| 2116 | 25 | 76 | 771  | TACGCCTATATCCACCAACTCAGTGGCAACAACAGCAGTAGCAGCAGAGATCTAAT/    | 1900 | A_95_P264966 EB449034     |
| 2120 | 25 | 80 | 910  | ATATGAAATCACAACCGTGAAAAATTTAGTTGTAGTGTGATACTGAAATTATGGT/     | 1908 | A_95_P200727 TA17269_4097 |
| 2129 | 26 | 4  | 134  | AACTGGGTAACTTCTTTGGCCCAAGGTTAATTTGACAGACTTTCTTTAATTTAACT     | 1759 | A_95_P141937 EB445540     |
| 2137 | 26 | 12 | 876  | AGCTACCACTGCCTGAATACCCTGGTTGCTCGTTTCTTATTTCTTCTTCAAGTA       | 1775 | A_95_P258653 TA12129_4097 |
| 2144 | 26 | 19 | 402  | GTACATGCACAGAAATGTAAGGTCACTTATGCTTCAACTCTGAATATAATAAACA      | 1789 | A_95_P008531 EB431801     |

|      |    |    |      |                                                               |      |                           |
|------|----|----|------|---------------------------------------------------------------|------|---------------------------|
| 2146 | 26 | 21 | 622  | CTTCAATTGCGATAATAGGCAGGGAGATTACTATGTCTGCAGTTCGAGAATGGGCAC     | 1792 | A_95_P127127 FG144509     |
| 2147 | 26 | 22 | 764  | GTCTGATGCTTGGGTATGAGTTTTTGACATAAAACAATCACAAAATGAGTTGTAGTTTC   | 1794 | A_95_P204952 EB445412     |
| 2151 | 26 | 26 | 343  | TCAACCGTGTTTAGTGGTGAGAATGGGTATTTAAGTTACTTCAATGTTACTCTTTCTC/   | 1802 | A_95_P019386 EH620340     |
| 2152 | 26 | 27 | 607  | TTGGCAAGAACACTGTTTTTCTAGTTTTGACTCTTGAGCAAATATTGGCTTCTTTATC    | 1804 | A_95_P182252 TA13168_4097 |
| 2155 | 26 | 30 | 690  | CCCCCTCTTTGAAACATAAAAATTCAAAATCCTTTAAGAATTTGAGAACTTGACTTG     | 1809 | A_95_P088473 BP530081     |
| 2156 | 26 | 31 | 1221 | AGTATGTTCTGAGTGGTAATCTTTTGTGAATTATAAAGTAAACCTGGGTTTAGGTTG     | 1811 | A_95_P018561 TA14557_4097 |
| 2160 | 26 | 35 | 277  | TACAGCTGAACAGGAAAGTCTTGTGAGAATTGTCGATGCACGAACCATACAGCTTCA     | 1819 | A_95_P102157 FG640658     |
| 2161 | 26 | 36 | 486  | ACTGCTCCGACAGCTAGTAGAACTAGAAGACAATTCTAATTTTTATGGAGGAATGAG     | 1821 | A_95_P307938 FG640175     |
| 2162 | 26 | 37 | 500  | ACACTGTAATGCTGCTGAAGTATTTATTTCTTGTATGAGATTCTTGTGGAGTGTG       | 1823 | A_95_P287943 BP530879     |
| 2168 | 26 | 43 | 141  | GGAGCTATATGGATGTGATTGTGAATTAAGACTGGTTCGCATTGAATCTATTAGTAG     | 1835 | A_95_P112332 CV020626     |
| 2169 | 26 | 44 | 1168 | TAATTGCATTGTGTATCTGCTTCAGGGAAAAAGAACGAACTAGATCAATAATTTCTGC    | 1837 | A_95_P011461 AB036735     |
| 2172 | 26 | 47 | 145  | GTGAAGGATTTAGGGAACCTTATGTATTTAATTGACTCCTTAAGAGCTGAATATGAG     | 1843 | A_95_P147652 EB452169     |
| 2175 | 26 | 50 | 856  | AGATTGAAGAACTCCAGAAGTTGAACGTGCTTTTGTCCATCTTGATTATGAGTGTG/     | 1849 | A_95_P228929 EB424649     |
| 2180 | 26 | 55 | 407  | GCCTGAAAAGAACCTTGGGGAATTTTCTACGTCATCCAAATTATGTGGTTTCAAATAT    | 1859 | A_95_P018086 FG623230     |
| 2181 | 26 | 56 | 422  | GTATGAAAGGAAGCTGATTTGGGCTGTAACACGAACTTATCAATATATATCTCTCTT     | 1861 | A_95_P000051 FG625247     |
| 2185 | 26 | 60 | 380  | TCAACAGGCATTTTCCAACAGGGGAACAGCCCAAGCTAAATCTCTTGATGCAGCTAT     | 1869 | A_95_P236074 BP134550     |
| 2187 | 26 | 62 | 781  | TTGAGGTTCATAATGCCATTTCTTTGCCAACCAATTTGGGTGTAATTTGAGTCAAGTG    | 1873 | A_95_P012871 TA18107_4097 |
| 2188 | 26 | 63 | 334  | TGTTGTAGGGATGTCTTTTGAACCTGTACCTTTACAGAAAAGAGAAAAGAAAAGTC      | 1875 | A_95_P134582 EB437145     |
| 2191 | 26 | 66 | 821  | ATGTTATGATTCTGTTATGTTTGAAGGAGGAAGCTTTTATTAGAGTAACTGGTGTTC     | 1881 | A_95_P198832 EB424739     |
| 2193 | 26 | 68 | 615  | ACTCTGATAGAATAATGGATGTGAGATGTTATCTCCTGCGAGCATAAGATCTCTGTG     | 1885 | A_95_P019186 TA19579_4097 |
| 2197 | 26 | 72 | 583  | GAGCTTGGTGGGTCCTTGAGAGTTGTGGATTCTGCATTATCTGTTAACGCATAACAA/    | 1893 | A_95_P046781 BP131484     |
| 2202 | 26 | 77 | 768  | GGAGCTCGTATTGCACCTTGTGGGATGATATCCGAGTACAACAAGGTTTGGACAGAA/    | 1903 | A_95_P295973 EB449118     |
| 2206 | 26 | 81 | 712  | GTTTCATGTGCTTTCTGGCATTCTGAGGTAATTCATTTGGTTTTTCATCTAAAGACTGTAT | 1911 | A_95_P196962 TA16457_4097 |
| 2217 | 27 | 7  | 108  | CTCAGCGGGCTATGTTATATATGAATAGTGGACCATTAAGACCATTTTATACAGGAT/    | 1925 | A_95_P142752 EB446162     |
| 2221 | 27 | 11 | 771  | GTTCAAAAAGCCCATCCATCTCTTTCAACTGAAGATGGTTCGTGGTTTTCTGTATATTTT  | 1933 | A_95_P254174 EB449045     |
| 2222 | 27 | 12 | 449  | TGTCCTGTTAACTTCTGGTCTTCTGCACGCTCAATATTGCTATAAACTTGTTAATTTG    | 1935 | A_95_P152562 EB682890     |
| 2228 | 27 | 18 | 679  | GTACAAAATTCAAGGTTGTTACCTAAACTAGTCGAGGCATTTTTTATTACAGATGC      | 1947 | A_95_P286458 FG640556     |
| 2229 | 27 | 19 | 159  | GTAACCTAATTCTCACTCCATCACAAGGCTCTTTCCGAAAATACCAAAAAATCGTATTTG  | 1949 | A_95_P097413 BP534033     |
| 2235 | 27 | 25 | 745  | TATAGCAGCATTTTGGACCTTAACTTTGAGATTCATATGATTCGCACATCGGTACCAG    | 1960 | A_95_P145987 EB449801     |
| 2238 | 27 | 28 | 411  | TTGGGGGACTGTGAACTGGCTTGTGTTTGTGTAGACCTGATGCCTCTGTTAATTTAAAT   | 1966 | A_95_P242207 AM803627     |
| 2245 | 27 | 35 | 1052 | CGCAGTTTCTAGCGCTGTGTCAATGATCTTTGCTCTCCAGTTTTATAAATAAATCTTTT   | 1979 | A_95_P192222 TA15405_4097 |
| 2247 | 27 | 37 | 246  | GTCGCTCTTCAGAGCTGTATCAAGGCAAATCCTAACGCATTTTCAAAGGACATCCTAG    | 1983 | A_95_P069290 BP530854     |
| 2248 | 27 | 38 | 796  | GATCCTGTATGAATGCTAAATGCCTCGTACATCAAGCTGCCCTTTTAACTATAAAAT     | 1985 | A_95_P028561 X97945       |
| 2249 | 27 | 39 | 652  | AACTGCTGTTACGCTGAATAGCTGAACTGTGGAGTAATACTAATGTTTCTGGCTTTAC    | 1987 | A_95_P266306 FG636446     |

|      |    |    |      |                                                             |      |                           |
|------|----|----|------|-------------------------------------------------------------|------|---------------------------|
| 2255 | 27 | 45 | 3121 | GGTTTACTTCACAAAATGAACTGTAATCTCATTGTTGGCTCAATGGAATATCAAGTT   | 1999 | A_95_P239934 X59016       |
| 2257 | 27 | 47 | 42   | TATGTTGTGGATTAACCTTTTGTGAGATTTCTAAGTGTTAATCTGCAATGGGGTACG   | 2003 | A_95_P031561 EB445604     |
| 2264 | 27 | 54 | 60   | TTGGGTGCACATTTATGTGACCCAAATCCGAATCTCAACGGAGTCGAAATGTGTCAA   | 2017 | A_95_P097838 BP534219     |
| 2265 | 27 | 55 | 785  | GTTGTTGTAACTTGTAACCTTAATCGGTGCTTACGATTGCACCGTGTATATCATTG    | 2019 | A_95_P133977 EB435692     |
| 2266 | 27 | 56 | 689  | TACAACAAAGCAGAAGTCTGAGCACAGAGGTTTGGCATCTAGACCTCCAGTTAGTTG   | 2021 | A_95_P314558 FG173217     |
| 2268 | 27 | 58 | 128  | AGATGGATGTGCCGTCGCCTGCATAGACGTATTGCAGATAACTCATGCAGCTATATC   | 2025 | A_95_P155942 EG650334     |
| 2269 | 27 | 59 | 135  | ACATTACATAGCATTGATGTTTTGCGTATCCTGGCCCGGGTTATTTGACTTCCAAAA   | 2027 | A_95_P255909 EH617005     |
| 2274 | 27 | 64 | 844  | GTTGGAACCTTTTAAAAGTGAGTATTCTGTAGCTTTTTGCTCGTGTAAAGCAAATAT   | 2037 | A_95_P020786 TA14532_4097 |
| 2278 | 27 | 68 | 795  | CATGTCTGCATTGCGTTTCATTCAAGCGCCGAGTTGCATATCAAATGTTGGCTATGAC  | 2045 | A_95_P079970 EB424877     |
| 2280 | 27 | 70 | 807  | CAAATTATCATATATCAAAGCCGACGCCCTCAGAAAGAGAAAAAGAGGAGATAGA     | 2049 | A_95_P227919 EH622808     |
| 2289 | 27 | 79 | 1195 | AAGAGATCCTGTTCAAGTGAGGAGAATGGCTTCGCGGAAAGAGGAGATTTATCAAG    | 2066 | A_95_P184667 TA13745_4097 |
| 2290 | 27 | 80 | 666  | CTCGAGCGGATGATAGGGTTTCATTAAGTTTCTATTAGGATTTAATTCAGACT       | 2068 | A_95_P014241 TA12817_4097 |
| 2291 | 27 | 81 | 440  | AACGGTGTGGCCAAAATGGAGAAGATCCTTGGTGTTAAACTTAGAGGTAATAATCA    | 2070 | A_95_P025311 FG642155     |
| 2299 | 28 | 4  | 1334 | GAGATACTATGTATATGTAATTGGCATTTCATTTTCTTGCTTCGGCAAGTTTGCAACT  | 1920 | A_95_P214117 TA20193_4097 |
| 2303 | 28 | 8  | 784  | GCTGTGTCAGTTAAGGTTTTCTTTTGAATTTAATCACAGACTTGACATACTCTATTE   | 1928 | A_95_P003146 TA16403_4097 |
| 2304 | 28 | 9  | 782  | TATGCAGGCAGACACAGTAAATGTGCTTCGTAGTACTACTTTATATATCCATGTTAAA  | 1930 | A_95_P271191 EB440232     |
| 2305 | 28 | 10 | 1370 | GACTGTCTGTCTGTGGTTGTATTTGTTCTTCATATACCAATACCAATCTTTTCTCCATC | 1932 | A_95_P011211 TA16016_4097 |
| 2309 | 28 | 14 | 946  | TTGGATGGTTTGATAGCCATGTTGTTGTATTCCAAATTGATATTCCACTAATGGTATT  | 1940 | A_95_P025901 TA17914_4097 |
| 2317 | 28 | 22 | 778  | GAGAACTAAAGGCAATCTGAAGGAAAACATGCTAAATTTTGGGCAACATGTGCAAA    | 1955 | A_95_P192692 TA15508_4097 |
| 2318 | 28 | 23 | 663  | AGGTTGGAGCCGTTGCATAGACTTGTGGCATATCTTTCAGTCAACATCCTTGTGCAAT  | 1957 | A_95_P146287 EB450281     |
| 2320 | 28 | 25 | 632  | TCCATTTCTTCTCCGATGATGCTTGCTGGAGTGCAGCGAGCTTGTATTCTGAGTATA   | 1961 | A_95_P066415 BP136598     |
| 2323 | 28 | 28 | 371  | TGTAATTTGATTTCGACATGCTGTAAGTGTGCTGGATGCTCCCTTATACTGAAATATC  | 1967 | A_95_P127787 EB427357     |
| 2338 | 28 | 43 | 775  | TCCGTTCTTTGGTCATGTCAGCCGAGTGTATGTTGCCATTGATCAAAGACTGGAAT    | 1996 | A_95_P234779 EB450504     |
| 2344 | 28 | 49 | 1090 | GCTGCACCCATGTAATGATGATTCAAGATTTGAATGCATTTCTACTCATAGATAAAG   | 2008 | A_95_P177967 TA12113_4097 |
| 2346 | 28 | 51 | 495  | AAACAACGATAGCGTGCAAATACTACTAGAAATTGAATGAAATGCCATATCATCGGAA  | 2012 | A_95_P285363 FS418967     |
| 2357 | 28 | 62 | 492  | CACAATCAAATCTGTGATATCCCTATCATTGCTCCTTTTGTATTGCTATAGCCAATT   | 2034 | A_95_P009516 BP128540     |
| 2360 | 28 | 65 | 773  | TAGGCTGGGGGATAGTCATGCAGTTATGCTGTTTAGAGCACTTCTAATATATACCT    | 2040 | A_95_P229355 EB450123     |
| 2361 | 28 | 66 | 836  | GATATATGGCATCTCTTTCACGACGCAAAATTTGATGGTCACACAACATTTTTTGAG   | 2042 | A_95_P217027 TA20838_4097 |
| 2367 | 28 | 72 | 19   | ACAACCCAACTGGTATTGATCCACAATTGAACAATGGGAAAAGATTGCTGATGTAA    | 2054 | A_95_P127937 AB126259     |
| 2371 | 28 | 76 | 720  | ATTAGTTCACAAAAACAAAATAAAAAGCCGGCCGGGGGTATCCAATGCCTATGTGCC   | 2061 | A_95_P232624 BP530798     |
| 2373 | 28 | 78 | 934  | GCAGCTCGAAATTCACATTACATGTACAATAAAAATGACAATACATTGCACTGCCCTC  | 2065 | A_95_P183007 TA13355_4097 |
| 2375 | 28 | 80 | 122  | ATTTATCAGGGAGAAGTGTCAACTTATGATACTTATGACGCGGTCTTCGTGTTTCAGT  | 2069 | A_95_P034529 AJ718931     |
| 2384 | 29 | 4  | 662  | AGTCACTGCCAGAATGGTAGTTTATATATTCTATGTAGTAGCACGAAAAAAGATGCT   | 2079 | A_95_P207337 TA18718_4097 |
| 2385 | 29 | 5  | 238  | ATGTTCTATTGGAGTGTAGCGTTGGGGTTGTTCTAGGTTAGCAATGGAAAGTAAAGT   | 2081 | A_95_P138812 EB442551     |

|      |    |    |      |                                                              |      |                           |
|------|----|----|------|--------------------------------------------------------------|------|---------------------------|
| 2394 | 29 | 14 | 601  | GATTTGATTGGCTGGTACAAGACATTGCATCACGGATCTATATGCTTGATTGAGTAA/   | 2098 | A_95_P292993 FG644433     |
| 2397 | 29 | 17 | 650  | ATATATGCCTCAGGACATTCTGGATTAGACGAAAATCTGCCAATATCCTGATGAGGC/   | 2104 | A_95_P062085 BP135422     |
| 2401 | 29 | 21 | 1070 | TTTTGCCCTTTGGATGGACAATGGACAGTATTACACCATCTTTTATGGTTGTGGTTCTI  | 2112 | A_95_P010656 TA13680_4097 |
| 2404 | 29 | 24 | 409  | TTCTGCTTTGGTTAGTTAATGGTCATACTTTTGCATTTTGGCTGTTTATCAAGCAC     | 2118 | A_95_P141007 EB444809     |
| 2407 | 29 | 27 | 786  | CAATGAAAGAAATGCAGAAGAATGGATCTTGGGTAACCAGATTACTTTGATTGTTGC    | 2124 | A_95_P010986 DV999391     |
| 2410 | 29 | 30 | 1021 | CGGATGTCATATCTATAGTGAATTGTTTGGTTCATTATAAATGATTGGTTGGTCTCTA/  | 2130 | A_95_P012886 TA15273_4097 |
| 2413 | 29 | 33 | 866  | GAGTTTCCCGAATGTTTTAGTGATTTTTCTGATATCTGATAGATTTGGAGGTTACTGG'  | 2136 | A_95_P192398 TA15443_4097 |
| 2414 | 29 | 34 | 490  | TGGGTGGAGGCATCAGTTCGTTTATCGGAGGGCGAATGAACATGATTTTGTATTAAC    | 2138 | A_95_P083005 BP528649     |
| 2415 | 29 | 35 | 669  | GGAAAAGAAGTAGTGAGGTTTATCTTGGTTGATTTACTTGTCCCATCTTTTGTATCC'   | 2140 | A_95_P005026 FG167674     |
| 2416 | 29 | 36 | 99   | AGTTTGACCACTCGACCTCCCATAGTGGTAAAATTAGAGTTTATGGTTGATTTGTTG'   | 2142 | A_95_P129542 EB429512     |
| 2422 | 29 | 42 | 454  | AAGTAACAGATAGTCATGAAGGCATTCCCTTTGTTCTATTAAGCTGTACTAATTA.     | 2154 | A_95_P023261 BP531380     |
| 2426 | 29 | 46 | 662  | TAGCTTGAACCAGATGAGCTGCTTCCAGTTTTGAATCAAATAATGTTTCAAGATG      | 2162 | A_95_P015941 EB444306     |
| 2428 | 29 | 48 | 1525 | GTGGTGTGATAGTGTGATTTGATTTTGGAGTGTGAACTTTTGTATGGTTGATGATG,    | 2166 | A_95_P008451 Z37978       |
| 2441 | 29 | 61 | 619  | ACAGTGTAAGCTTAAAGTATACAGAGCCAGAACTCTGGTCTCTCTCTTAAGAGATA/    | 2192 | A_95_P039586 BP129590     |
| 2444 | 29 | 64 | 394  | TTCCATTGTTAATTGCCTCTGATTTATTGTTGTAGGAGTCTTAGTTGGAGAAAGGTT(   | 2198 | A_95_P198017 TA16687_4097 |
| 2455 | 29 | 75 | 775  | AAGCTATCTTTATTGCATCTGGAGTTGGCACTGATCTTCTTTTGTATGAATGTTTTCT'  | 2220 | A_95_P117737 DV160682     |
| 2457 | 29 | 77 | 832  | CATGAATTATCAACCCCAAGAAGAAAGTCCACAAGAAAAGAAAAGAGCAAAATGA/     | 2224 | A_95_P289278 DV158497     |
| 2460 | 29 | 80 | 156  | CTGTTGCACATGTCTCAGCTGCGAAACTATTGGCTCAAGCATTGAGTTGGCATCATAT   | 2230 | A_95_P233934 AJ718943     |
| 2462 | 29 | 82 | 511  | TGTAAGAGTAGTAGATGGATCAATCACTTGCATATTCCTTTTTGCAAGTACCTGATT'   | 2234 | A_95_P283093 AM834279     |
| 2463 | 29 | 83 | 813  | ATGAGAGATGGGATCCGAAAGCAGTACTAAAGTAGAGCATCGTATCAGTACGTGGT     | 2236 | A_95_P312698 FG160619     |
| 2470 | 30 | 5  | 650  | GGATTTTATGCTTTTTACGTGCTTGATGTAGTCATTAGATTTTATGGTCTGCTCTTTT'  | 2082 | A_95_P192917 TA15559_4097 |
| 2471 | 30 | 6  | 553  | GGGATAGCTAAAGGGGTTTTTCTGAGACTCTGAATTTTGTGTCAGTATTTAGTGATA/   | 2084 | A_95_P017496 TA13353_4097 |
| 2473 | 30 | 8  | 561  | TCTGTCCATAGATCGCTGCTGTATTAATGCGGATTGGCTTGTGTATAATATAACAGT    | 2088 | A_95_P309303 FG645534     |
| 2476 | 30 | 11 | 701  | ACTGTTGTTGATGAACCTAATCTGATCCTTTCTAACACCTAAGTTTTCTTCTTAACT    | 2093 | A_95_P136082 DV162727     |
| 2477 | 30 | 12 | 1623 | GAGGTTCTCTGACATTTTTAAAGACCTCAATAGCTTTGCTAATATAGTGGGCACTTTG'  | 2095 | A_95_P023801 TA14230_4097 |
| 2483 | 30 | 18 | 550  | ATCCTGGAAGTTAGAGAAGTGAATTTGTATGATGCCGTTGTTCTTTGTTTTGCTTTT'   | 2107 | A_95_P017441 DW005086     |
| 2486 | 30 | 21 | 821  | TATAGCAGCTTATACTGCAGCTTGTAGTAGCAGCTTACACGGCAGCTTGAATAGCA(    | 2113 | A_95_P128092 EB427637     |
| 2492 | 30 | 27 | 564  | CTAATGGTGTTAATGTCTTCGTTACTTTCTATGTTTAAACCCCTAACCATCCCTGCCAA/ | 2125 | A_95_P161947 EH620535     |
| 2494 | 30 | 29 | 1478 | AAGCCATCTTCCATGTGGAGTGTATTGTTTGGAGAAATGCAATTTACTGAAGCTTTTAC  | 2129 | A_95_P182927 TA13338_4097 |
| 2504 | 30 | 39 | 1025 | GATGTCCCTTTTCTCCCTATCTTTTGGGTTGACATAAACCTTATGTGCATTTATTGA/   | 2149 | A_95_P223262 TA22211_4097 |
| 2509 | 30 | 44 | 419  | CTAAGGACTCTATGAAGCAGACGATTTCTACTATGTTAGGCTTGTCTCCCTCCGATCA   | 2159 | A_95_P158727 EH616596     |
| 2512 | 30 | 47 | 875  | ATAAATTGACACGCCGCTGTGAAGTACTGCAATTTCTTATCTTATACGGTCTACCTAG   | 2165 | A_95_P069635 EB682391     |
| 2513 | 30 | 48 | 841  | GTCTTATTGAGAACTAAGTCTGTTTTCTTGTATCGCTTCTTGTCTTTGATGTTAA/     | 2167 | A_95_P248247 EB424783     |
| 2514 | 30 | 49 | 782  | GCGTTATTATACCTTGGGCGCGCCATTAATCTTGGAGTTATTTCTTTGTTCTTTTTA/   | 2169 | A_95_P218122 EB426328     |

|      |    |    |      |                                                             |      |                           |
|------|----|----|------|-------------------------------------------------------------|------|---------------------------|
| 2515 | 30 | 50 | 771  | CTGTTTCGAGTTTGGTATTTTGTGGCTTGGACAGTTGGAATCCTAGCTATAAAATAAC  | 2171 | A_95_P258663 FG163600     |
| 2517 | 30 | 52 | 1590 | CTTTTGATTACTTGTTCTCTCAGTCTCAGACTTGCTGTTGTTGGAGTTATTGAATTTGA | 2175 | A_95_P181207 TA12924_4097 |
| 2518 | 30 | 53 | 845  | AAAGCTGAGCATCCCACATGACATGCCTATTATCGATTATGACTTGGCTGTCTCATCA  | 2177 | A_95_P291028 FG153536     |
| 2524 | 30 | 59 | 613  | CTTCACTGGTGCTTAACTCAGCTTCCAGCTCATCGATAATCTACGTCAATAAGAAAA   | 2189 | A_95_P158977 EH616867     |
| 2527 | 30 | 62 | 781  | TCACTTGGCTATAAGGTCAAGAAGAGCCTCAAGAATCATGTATCTTCGTGGGGGATG   | 2195 | A_95_P217412 DW001948     |
| 2528 | 30 | 63 | 915  | CGCCCTACCAGAAAGTTATGTCAAAATTGTTTTACGGTGAATTGCTCTATACTACGTT  | 2197 | A_95_P133467 EB430421     |
| 2532 | 30 | 67 | 1284 | CCTATTTGGACTGCTTGTCTGTGTTATACGTTTAGATAGTTTCAACTTATTGTGTGTGC | 2205 | A_95_P230619 GQ260131     |
| 2534 | 30 | 69 | 1089 | TGATGCAGACAGTGACAATAGCGGGGATGATAATGATGATAGTGGCATATCGCTAG    | 2209 | A_95_P200792 TA17283_4097 |
| 2540 | 30 | 75 | 351  | CACCTACGAAAGGTTGTTGTGAGCATAACCCAAGGTATACACTTTGTAAATTTCTT    | 2221 | A_95_P095893 BP533380     |
| 2541 | 30 | 76 | 329  | GTTATCGGTATGCCTTGACAAAGAGATGTATTATGTCAATGCCTCTGAACACTATGG   | 2223 | A_95_P132677 EB433261     |
| 2542 | 30 | 77 | 1643 | GAGGATAGAAAATAGGATTATGGATGCTCCTGACCATGTACACTTAAAACATATCTGT  | 2225 | A_95_P019581 TA12715_4097 |
| 2553 | 31 | 3  | 239  | GGGGATTAACCTTTGTATAAATGAGACTCTCTTAGTTTGTCCATATAAGTTTCCA     | 2241 | A_95_P154742 EG649742     |
| 2555 | 31 | 5  | 443  | ATGGCCACACTTCGAAATGTAAACTAAGTTGTAAAGAGATTTCTTGGGAATAAAGC    | 2244 | A_95_P003001 FS414230     |
| 2559 | 31 | 9  | 111  | TCCACCACCTTTGACTGGAGATCTTTGGCTTAAACTTGTGCTGTATGAGGTTGTACT   | 2252 | A_95_P143382 EB446710     |
| 2563 | 31 | 13 | 795  | CTCGGCATGACATTTAGTTCATTAAGATGTTAGGTGTGGTTATTCTGTATGTTGAATT  | 2259 | A_95_P204227 DV160192     |
| 2575 | 31 | 25 | 709  | TAAAGTCGAATGATCACTAGCAGATATTTTCACTAAGTCTCTTACTGGTTCTCGTATT  | 2283 | A_95_P164597 EH623846     |
| 2578 | 31 | 28 | 738  | GTGGGGATTAGGCCTTTGAAAATATACAATTCACGACAATTCAGAAAGAAGTCTCT    | 2289 | A_95_P145302 EB448935     |
| 2580 | 31 | 30 | 266  | GGCTCAGAAGTCAACTCTTGAACACGTTTAAAGTTTCTAGGATTATACATGTATATC   | 2293 | A_95_P134732 EB437461     |
| 2582 | 31 | 32 | 636  | AGAAGAATGGGAAGGAAATCATCCATGGAAACCTTGGGACCGTGAAAAGGATTTGA    | 2297 | A_95_P204982 EB677299     |
| 2587 | 31 | 37 | 1139 | AATGGAGATTCAACTTCTTGATCAGTCGATTGAAACCATTCTGTCGAATGTTATGGAC  | 2307 | A_95_P028306 TA17377_4097 |
| 2589 | 31 | 39 | 408  | TATTGGGGTGGTTTCTCAGATTTTGGGGGTGAACAGAAAAGATAGGGGAAAAATT     | 2311 | A_95_P099223 FG202927     |
| 2591 | 31 | 41 | 874  | AGATTTGCTCTTCTTTAACCTGGTGTTCGTAATAAATGTTAATGCTTGAGCTCTAG    | 2315 | A_95_P008781 EB426350     |
| 2592 | 31 | 42 | 854  | AACAGCTGCTCTTGATCAAACCTGCCACCCAAGTTGTTGATTGCATCAGTGGGAAATG  | 2317 | A_95_P231184 EB426728     |
| 2595 | 31 | 45 | 467  | ATGACGCTAGCCTAGGGATGTAAGTAACGAGGTTTATACTGAGAGGCTATGGAA      | 2323 | A_95_P106667 CV017998     |
| 2596 | 31 | 46 | 636  | GGTTACCTTGGAAATGCAGAAGACCTGGATAAACTAGATTTTGGAGACGAAGAAACG   | 2325 | A_95_P295568 FG637271     |
| 2610 | 31 | 60 | 308  | GGACAAGAAAGGAAAGGGAACCTCATCTTTTCTAAAATTGCCTGTGATGCAAAATTT   | 2353 | A_95_P106592 EB102901     |
| 2611 | 31 | 61 | 949  | ACATGTGGTGCAACTTTGCTTATGAAGAGAGCTAATCTAGATTCAATCTTACACGTTT  | 2355 | A_95_P025501 TA17447_4097 |
| 2612 | 31 | 62 | 424  | AAATTGAAAAAGAAAGCTTGGGTTCTTCCCAAACCGATTCCACGCTTGTCCAGGTCC   | 2357 | A_95_P280003 AM838454     |
| 2613 | 31 | 63 | 513  | GTTGCTAAGGTCTGGATATTGTAATTCCTCGTTATAACAATCAAGTAAAACAGACCATT | 2359 | A_95_P000741 TA12963_4097 |
| 2616 | 31 | 66 | 1067 | AAAGGATTTGACTCTTGTGGATCTACTGAATTGTTTAGTCATTGCTAGCACGGTTTT   | 2365 | A_95_P179272 TA12465_4097 |
| 2620 | 31 | 70 | 613  | TGCCAGTTTTGGCGGTTGTATAATCTACTGATCCTACAGAAGTGGAAGATTCTTTTG   | 2373 | A_95_P151302 FG635179     |
| 2621 | 31 | 71 | 935  | GCTGCCTATCTTAAGGTTTCAATTTGTCAACGCATTTGATGTATGATGTGACTTCTTCA | 2375 | A_95_P002256 TA11934_4097 |
| 2623 | 31 | 73 | 716  | ATTCAGAATCCGACCACTCACAGGAGTCTGATCAAGGATATGAACCTTCAGATGTAG   | 2379 | A_95_P242932 EB426614     |
| 2633 | 31 | 83 | 312  | TCAAGGGCTTTATTCTTAAATGTCCATAGCTGGAACCTACAGTGGCATCTTCGATCAA  | 2399 | A_95_P070640 BP192688     |

|      |    |    |      |                                                              |      |                           |
|------|----|----|------|--------------------------------------------------------------|------|---------------------------|
| 2640 | 32 | 5  | 630  | TCTTTCATCTGGGTGCTTACATATTCATCAAGTCTGTTCGGTCAAACGAGTCAGACTTC  | 2245 | A_95_P063525 BP135803     |
| 2643 | 32 | 8  | 225  | CTAGTCAAGAAAAGTCTTCCCAAGATGTGGGATCACATTTTTGAACTGACTCATTTA    | 2251 | A_95_P158982 EH616875     |
| 2648 | 32 | 13 | 787  | TGCTGTCTTCTGGAGCAGATACTAATAATGTTGGGGATAAGGTGCTATTTTGACTGA    | 2260 | A_95_P186577 DV158612     |
| 2649 | 32 | 14 | 784  | GGTTTTCCATGCGTTACCATAGACCAATTTTCAGTAGTATAATGTCTTCTCCATTTTT   | 2262 | A_95_P307768 FG155283     |
| 2651 | 32 | 16 | 730  | GGCATTGTCTTGTGCTGTGATCTAGATGTTCTTAATAATGTGATGGAACCTTGATATAT  | 2266 | A_95_P012661 EB683906     |
| 2655 | 32 | 20 | 281  | TCATGTCCATGCATGGAGGGGTTTTATCTGAAGTTATGAAATAGACATTTGCTCAGC/   | 2274 | A_95_P134747 EB437498     |
| 2657 | 32 | 22 | 243  | GCCCTGATCGAATTCTTCAAACATGGGAAACCAAGAAAATAATAACAGTTTCTGAAG    | 2278 | A_95_P137077 EB429767     |
| 2671 | 32 | 36 | 819  | CGAAGATTGTTTTACCACAGGAATTAGCGAACCTTGAAATGCATGAAAGAGAATTA     | 2306 | A_95_P205782 TA18364_4097 |
| 2675 | 32 | 40 | 415  | CAAAATCTGATCTTCAACGTTCAAATCAAAGAACAGGATATTGAGAATCTCCGGTCCA   | 2314 | A_95_P038751 BP129361     |
| 2684 | 32 | 49 | 415  | TTTGAGTGGAACAGTGAAGGAGATAAGGGCACGTGTGTATCAGTTGGTTGTACGGA     | 2332 | A_95_P108087 CV018663     |
| 2686 | 32 | 51 | 197  | CCTGCAGTTTATCTATCAATGTTCTATTTCTTCAATAATCCAAGATCCACTATTGTGGG  | 2336 | A_95_P080425 BP528000     |
| 2691 | 32 | 56 | 510  | AGCTCCTGCTCGAGTTCAGGATCTAGTCTCTATTATGCAGAAAGAAGTTTGCCTTGTG   | 2346 | A_95_P085100 BP529196     |
| 2693 | 32 | 58 | 905  | TGGACCTCCTTGTGGAATTCTGTTAATAATATGAGTTAATTGGTACTCTGTATCAAGG   | 2350 | A_95_P015741 TA13590_4097 |
| 2694 | 32 | 59 | 886  | GGTTTGAGTGTTATTGTACTGTAAACGTTTCGTTTTTTGAGGAAGAAAATCTCCCATTT  | 2352 | A_95_P032191 TA12181_4097 |
| 2697 | 32 | 62 | 140  | CTAGTGTCTGAGATTACGAACTTGTGAGTAATTTACTACTAGCGTTGTTAATCAATCA   | 2358 | A_95_P091948 BP531574     |
| 2705 | 32 | 70 | 378  | TGCAAAAGCTGAACCCCTTACTGACATCTCTCGAATATATGAGAGAGGCTGCTGT      | 2374 | A_95_P014441 TA13869_4097 |
| 2711 | 32 | 76 | 181  | CGCACTCCATCAGTTCATAGCCAAGGAAATGTTGAGATGGAAGCAACAATATGTTAA    | 2386 | A_95_P003821 TA21758_4097 |
| 2712 | 32 | 77 | 831  | AGCTTTATGGAAAGCTGCCTTCTGAGGAAGAATTCGTGGTTAATATCTGAACAC       | 2388 | A_95_P146222 EB682547     |
| 2715 | 32 | 80 | 797  | GTACCTGATCAAGAAGACATAGTTGGAAGGAGACACATTGATTATTAGGTGGGTG      | 2394 | A_95_P210962 DV159002     |
| 2722 | 33 | 2  | 0    | CAAGGATGTTGGAGATGCATTTTGCATTCCATAATCGTTTGTCTAAAAACAAAACCACC  | 2404 | A_95_P023906 A_95_P023906 |
| 2723 | 33 | 3  | 840  | CTTGCACTGTAAAGGGCATTGTAAAAGTCCCTTGTGAATCTTGATATACTATTAATCC   | 2406 | A_95_P124617 DW004404     |
| 2724 | 33 | 4  | 788  | TTGATAACTATGGGGAAGACGATTTGGAGGGTGAGGATGACATTGATGATGATACC     | 2408 | A_95_P229609 DV160165     |
| 2728 | 33 | 8  | 540  | AGCAACTGTGCTTCTCTACGATGCTCCTATAAATCTTCTTGTACATTTGAGGTTGCTT   | 2416 | A_95_P143952 EB447159     |
| 2729 | 33 | 9  | 648  | GGATTTGAGGATAATTTTGGAGAAAGTGCAGTTTTATTGGCATTGTTAGGATTTGG     | 2418 | A_95_P190657 EB678112     |
| 2731 | 33 | 11 | 883  | AAGGATATCATCGCAGAGATACAAACAGAAAATGGTGAGGAGTGGTGGACGTATGT     | 2422 | A_95_P229389 EB442871     |
| 2732 | 33 | 12 | 862  | ATTTTCTCAACCCACCTCCAGCGAACGCTACGAAACAACCTTGCTCTCGTTTGAGAAA   | 2424 | A_95_P212852 EB449778     |
| 2744 | 33 | 24 | 658  | TTCCAATTACTTTTGTGCGATAGAGTATTTGGAAGTTCCAAGTCTGGGAGGATCTGAA   | 2448 | A_95_P050931 DV159747     |
| 2745 | 33 | 25 | 609  | ACTGCCCCAACTTGGCTAATTTTTGACGTTACGTGAAATCTTAACTTGGAGTATTCT    | 2450 | A_95_P189012 EH617488     |
| 2748 | 33 | 28 | 150  | TAAACGCAGGCACTGGACGTAGAACCACGCTAGGATTATAAGGTGAAAGATTGGTG     | 2456 | A_95_P105072 CV017286     |
| 2749 | 33 | 29 | 1205 | CAACAGTCCATCTAGAATGTAGGTTAACATTTAACCTAGGAGAAAACCTTTTAGCACT   | 2458 | A_95_P204187 TA18012_4097 |
| 2750 | 33 | 30 | 554  | ATTAGACTATGTTGGTGCAGAAATCAGCATGTCAACTAATGCATCTTCTTTATAGTA    | 2460 | A_95_P231944 FG637879     |
| 2751 | 33 | 31 | 735  | GCTAGCTCGTGACATGAACCTACTTTATCTGGTGTATTATTGAATTGTGATTTCTT     | 2462 | A_95_P010296 DV999846     |
| 2759 | 33 | 39 | 727  | GCAGAGCTTGTCCATATTTGCTTTGATCTCTGTACATTATTTCTGATAAGATGTA      | 2478 | A_95_P024386 EB428278     |
| 2763 | 33 | 43 | 1520 | CTTTGGTTGTTCTTTCAGTTGCTGCATTTTAGACATTCCAGTACTAGTTTATACTTTGAT | 2486 | A_95_P009281 AB052822     |

|      |    |    |      |                                                              |      |                           |
|------|----|----|------|--------------------------------------------------------------|------|---------------------------|
| 2764 | 33 | 44 | 794  | GAGACGCAATCTTTGTTGTTGCTTAGATTGAGTATTGTTTCTCTCTTTGTTTCACT/    | 2488 | A_95_P255459 EH615240     |
| 2766 | 33 | 46 | 149  | TAATAGCAGCCTCTTCTGGTGCCATGAAAGCTGACGAAGTTGCCAAGATAGCTTTGA.   | 2492 | A_95_P033919 AJ717913     |
| 2767 | 33 | 47 | 795  | ATCTTGTTGGCAAGGTACACGGTACTTCTTTTGATGTTTTGTGACTTGTGATGTCTCT   | 2494 | A_95_P127992 EB427565     |
| 2771 | 33 | 51 | 1539 | GTGGGAGTAGCTATTTGATATGACCAGAATTGTGATTTATGAAGTCACTTCTGTTTT    | 2502 | A_95_P133687 U35111       |
| 2772 | 33 | 52 | 527  | GGAAATTGTAGCCTTTTGTCTCTTCTGAGCTTCATGTCTTTTCTAATGTACCTTACTAG( | 2504 | A_95_P141602 EB445283     |
| 2776 | 33 | 56 | 822  | ACCACCTGCTAATGCTTCCCTTTTGGGAGAGAGAATGAAGCTCTGCAGAGACTAGAA    | 2512 | A_95_P225772 FG135892     |
| 2780 | 33 | 60 | 777  | GATATGTGCAATGCTCCTTGTCTGCTTGTGTTGTGTATGACATATTTGGGTTTTCTATT  | 2520 | A_95_P014326 DV161576     |
| 2784 | 33 | 64 | 1485 | TGATCTGAAGGATCAATTTTCTGTAATTGATGTGGATAAGAATGGTGTGCATCAGTCTC  | 2528 | A_95_P028096 AY971376     |
| 2785 | 33 | 65 | 901  | TTCTGAGCATGCGTGGCTCTTCAAGTTGATGCAACCTATGAAGGCAATCCTTCAAGTC   | 2530 | A_95_P011106 EB680133     |
| 2790 | 33 | 70 | 858  | GACCTGAAAGAAAAGCAAAATTCATTTGTTTTCTCCGTTCTGGATTACTTTCCTCT     | 2540 | A_95_P013661 DV999924     |
| 2794 | 33 | 74 | 1142 | ATATCTCTACTTCAGAACACAACCATCTTTTCCCGAGTAGAAGTGAAGAGACTGTTTC   | 2548 | A_95_P198307 TA16750_4097 |
| 2797 | 33 | 77 | 474  | CTTACCACTGTTAATGTGGCGATTTGATAAGTGATTGGTTGCTAATCACAGTTGATA    | 2554 | A_95_P197802 TA16644_4097 |
| 2801 | 33 | 81 | 2001 | GGTTGTATATTGTGACAAAGTCCTCTTTACCCTTTTACCCATTGATTAACATTGTTTC   | 2562 | A_95_P023196 X71057       |
| 2802 | 33 | 82 | 861  | AGAAGCTTGCTATATGCTGCTGCTGTGCGAAGCTTTTGTGTGACATAGTATTTTCCCTC  | 2564 | A_95_P218817 EB450082     |
| 2803 | 33 | 83 | 513  | AACACGCGTTGTTCAAGAATCAATATCATCTTGATTTTGACCAGTTTGGTTATGTTGC/  | 2566 | A_95_P231789 FG644307     |
| 2809 | 34 | 4  | 458  | TTTAATAATAAGGATGGCTTCTCAGGACGTTGGGTTGCGTTTGGTATACTTTATAGG/   | 2409 | A_95_P116502 DV159262     |
| 2814 | 34 | 9  | 136  | TATGGTAAGAGAGATAATTTTACCTCCCAGGCCACCCCGAAGCCAGAAGATCTATG.    | 2419 | A_95_P055326 BP133672     |
| 2821 | 34 | 16 | 497  | CTCTCAGAAGTTCTGCCTCCACGTTCTGCCAGTGATTCTAATTTCTATCATAGTATGTA  | 2433 | A_95_P226509 EG650211     |
| 2823 | 34 | 18 | 475  | GCAAAATGGCATTGATCTAAGCACAGTTGATGTGAGTTATGTTTTCTTCTCTCATTG    | 2437 | A_95_P158112 EH616189     |
| 2825 | 34 | 20 | 492  | ATTTATTCATGCTTTCTGTGCAATAAGCCATTGAAGAAGACGGAGCATGTGAAAAT/    | 2441 | A_95_P139872 EB443794     |
| 2828 | 34 | 23 | 173  | AGGCATCTGTATTGATGGATTGTGTCATTCACTTCTGCTCGCACCATTGAATTGGAA    | 2447 | A_95_P110277 CV019661     |
| 2831 | 34 | 26 | 545  | TTATCATTACTGTTGTAGTTTAGAGCAGAACCTTGGTTTTCTGGGTGTACTTTGTTAGA( | 2453 | A_95_P044446 BP130882     |
| 2835 | 34 | 30 | 622  | CTCTTGATTCTTTTATCATTGTGGAAACAAGAAAATCCCCAAATTCTCTGAGGTAGG.   | 2461 | A_95_P143482 EB446772     |
| 2839 | 34 | 34 | 784  | TGGTGAGCTTTCTCCCTCTTGACTTGAGAAAAGAGAGCAGCATACAGTACATCTTATC   | 2469 | A_95_P116257 DV158876     |
| 2840 | 34 | 35 | 759  | AAATATGTATTGCCATTATTCTTTCAATTCATCTCCCTCCCAAATACTGGGCAACCCCG` | 2471 | A_95_P097853 BP534229     |
| 2841 | 34 | 36 | 486  | TTACAATAAAACAGTGAACCTTCACTTTCTTGCTAAGACTTGGAATAAGCTTGTGCTTC  | 2473 | A_95_P053156 BP133101     |
| 2843 | 34 | 38 | 467  | TCTTCGATACCTGCTGGAAACACGTTAACATTTCAATTCATCATCTATAATGTCCGCAGC | 2477 | A_95_P091918 BP531557     |
| 2846 | 34 | 41 | 0    | CTCTGTTTCCACCTCCAGTAAAGCAGAAGCCTCAGAAGGCCAAAGAAAAATTGGAGAA/  | 2483 | A_95_P013166 A_95_P013166 |
| 2847 | 34 | 42 | 1123 | ACAGTTGGGTGCGCCTGCGATGTGCATGTTTTCTTTGGTTAGGATGTAGTTGCAATT/   | 2485 | A_95_P192832 TA15541_4097 |
| 2849 | 34 | 44 | 1101 | CATAAACTGAGCCATTTTAAACATGTGGGACATTCATCAACAAATAAAACAGCCTTGC   | 2489 | A_95_P194202 TA15842_4097 |
| 2850 | 34 | 45 | 475  | ATTTTCGTAAGAAGACGGACAAGTTGGTAAAGTGCATAAAATTAATCCTCCCGAGTCT   | 2491 | A_95_P131472 EB431765     |
| 2856 | 34 | 51 | 262  | CTCTTCGTCATATTGAACCACAAGTTTGCTTCTTTACTTTACTATGTATTGAGCTGTAT( | 2503 | A_95_P154437 EG649591     |
| 2858 | 34 | 53 | 503  | GGCATTCTTTTGTCTGCAGATGTGAAACATGTGATATATACATACCTCTTTGGTCTAG`  | 2507 | A_95_P026251 TA21745_4097 |
| 2859 | 34 | 54 | 556  | AGGCAATGTTTAGTCTTGCATTCGTGAGCCAGTTGACTATGGGTCCTACTATATTATA   | 2509 | A_95_P125127 DW004935     |

|      |    |    |      |                                                              |      |              |              |
|------|----|----|------|--------------------------------------------------------------|------|--------------|--------------|
| 2865 | 34 | 60 | 837  | GTGAACTTTCAGGGAATGTGATTGATATTTGTCCAGTTGGAGCCCTTACCTCAAACC    | 2521 | A_95_P129057 | EB428820     |
| 2868 | 34 | 63 | 756  | GAGCTATGTCTAGGTA AAAAGGATTTCTTTCATCTGAGAGGAACTCTCATGTCTTGTT  | 2527 | A_95_P123182 | DV160610     |
| 2874 | 34 | 69 | 356  | ATGCTTTTGACCAATAATTATGTTTGTTCATAGCCTCTCTTAGGTAAGTAGGATTTG    | 2539 | A_95_P192187 | TA15398_4097 |
| 2876 | 34 | 71 | 770  | AATGGAGCTGGAGTTGTGCCTTATGAACTGTTGAAACCATTTTTCTGGACCTGGTGTT/  | 2543 | A_95_P150967 | EB681141     |
| 2877 | 34 | 72 | 28   | CCTGCTTTGTGCTTTGCAAATAGCAGGCTGTATTTCTGATATTAATTGAATGTGTAG`   | 2545 | A_95_P012376 | EB442968     |
| 2879 | 34 | 74 | 890  | TCTCAAGAATAATGACAGATGCATCTATGAAAGACTTGGCGTCTGCTGGCACTCCTG/   | 2549 | A_95_P289158 | DV157868     |
| 2883 | 34 | 78 | 159  | AAGCAGATTATGACAAGGAGTGCAAGATATGCACACGACCCTTCACAGTGTTCCAGAT   | 2557 | A_95_P167646 | EH664239     |
| 2887 | 34 | 82 | 755  | TGTTGTTGTGATTCTTACCTTTAAAAAGAACTTGTCCCGTCACCATCTGAAGTAGC     | 2565 | A_95_P017636 | AF422802     |
| 2895 | 35 | 5  | 491  | GAGGGAACCATATTCAGAAGGGTTGGTAACTCAAATGGGCATTATATATTAGTTAGT    | 2577 | A_95_P308568 | FG642847     |
| 2897 | 35 | 7  | 628  | GCTGTGGGCAGTAACATGAATTGCTAATTCATCTAGAGTGCTAATTCCTGAATTGAA/   | 2581 | A_95_P140142 | EB444092     |
| 2900 | 35 | 10 | 367  | GTATAAGCTTCATGGCCTTGGTCAGGAGTTCAAGTGTGAGATATGTGGGAACCATAC    | 2587 | A_95_P175012 | EH665986     |
| 2901 | 35 | 11 | 203  | TTCCCTTTCACATCTAAGTGGAAACAGTTGTTTCATCTAAGTATACATCCTCGGTTTTGC | 2589 | A_95_P095818 | BP533357     |
| 2910 | 35 | 20 | 1294 | GATGACACATTGTTGCTACTGCTAGTAGACATAAAAAAGTATTCAATGCTGCAAGGAAA  | 2607 | A_95_P010631 | AB004307     |
| 2913 | 35 | 23 | 490  | GCCGAGCTTCTTCAGTTCTAAGAAGAGACACAAAAAATGAAGCTTCAAAGAGGTGA/    | 2612 | A_95_P071375 | BP525688     |
| 2917 | 35 | 27 | 204  | CGAAGAGACGAGAGGAGTTTTGACAGATATTTGGGAGAATGTGATTCTGATGCT       | 2620 | A_95_P110737 | FG632373     |
| 2918 | 35 | 28 | 600  | GCAACTTCAGGTTTGACTTTCAATTTTTCTCCATGTAAGTCTGTTTTCTCAAGCTGTT   | 2622 | A_95_P019236 | BP530353     |
| 2920 | 35 | 30 | 570  | CCTTAGGTGAATTTTATCCCTAATGTTTTGAAGAACTCTCTGAGAAGTAGAA/        | 2626 | A_95_P195567 | TA16145_4097 |
| 2922 | 35 | 32 | 845  | GACAGGGTGATACTGGTTGTTGGATTATTATTTCTCCTGGCTGTTCTTTATGTGG      | 2629 | A_95_P290318 | DV162653     |
| 2923 | 35 | 33 | 779  | CATCTCTTACATGTACAGCCAACCTCGATATCGACTATATGACCTAGTATAACAATC    | 2631 | A_95_P267336 | DV159801     |
| 2930 | 35 | 40 | 874  | TAAATGTTCAATTTCTCAAACCTCAGAGAAGCATTGAGGAGAAAAAGACAGGCTGGGC/  | 2645 | A_95_P206427 | EB438827     |
| 2931 | 35 | 41 | 606  | GAATGGTACTGTGATACTCCATAACTTGCGGTACCAAGCAATAATCGGACCTATGC     | 2647 | A_95_P246802 | EB435034     |
| 2934 | 35 | 44 | 216  | TTGTAAGGACGCTTGTTCAGTAAGGACTAAGGATTTAATCCAGATGGTTTATGCAA/    | 2653 | A_95_P176252 | T18337       |
| 2941 | 35 | 51 | 767  | CAGCAATAATAGTGTAGAACCAGGATGACAGTGTAGAATGGGTGGGAGATGAGA/      | 2667 | A_95_P310283 | FG135791     |
| 2942 | 35 | 52 | 610  | GTGGTATGACAGTAATAAAGATGGTAGAGATTAAGAGTGGTTTTCTTCCCTTTG       | 2669 | A_95_P259406 | EB436297     |
| 2949 | 35 | 59 | 475  | TGGATGTTACTGGTGATAATGGGACTGCAAGTTTCTCTTTTTCAAAAAAGGCCATTCC   | 2683 | A_95_P159877 | EH618406     |
| 2952 | 35 | 62 | 813  | TTGATAGGCTTTTTAGTGAGGTATTACTTTCTTCCCAATTTGGTATCTGGCATTGCTT   | 2689 | A_95_P232974 | EB425670     |
| 2957 | 35 | 67 | 566  | GAAAGGATGTAGAATATATCTGTACAGTGAGTGGAGTTCTGGCAAAGTTAACTTA      | 2699 | A_95_P053861 | BP133296     |
| 2960 | 35 | 70 | 386  | TTCTAGCCCTGATTATCATGCCTATTTTGAATTTCTCCAATTCAGAATACAGATTT     | 2705 | A_95_P065565 | BP136366     |
| 2962 | 35 | 72 | 658  | GAAAATAACGTTTAACTTATTCTGCACCCCCACCAAATTTTTCCAAGCCAACCTTTTT   | 2709 | A_95_P296603 | FG638025     |
| 2965 | 35 | 75 | 125  | GGCGAACTGCTGCCATCATCATGAATTGAAGAATGAGATCGTAATTCAGAATGACA     | 2714 | A_95_P114977 | CV507105     |
| 2968 | 35 | 78 | 445  | ACCTCCTGTATTTGGATTCTGAATTGTGCATTTTCATGGTTATTTTTCATTCAAACCA   | 2720 | A_95_P181737 | TA13051_4097 |
| 2977 | 36 | 2  | 221  | TTAGCTTACCATTTTCTGTGAACCTGCAGCTTTTGAAGTTTTATGTTTCTCATTAGAGT  | 2572 | A_95_P196597 | FG626013     |
| 2981 | 36 | 6  | 732  | CATGCAATTCAGTATGAATTTGCTTGTAGATGCATGATTTTCATCTCCTGCCATGAAAT/ | 2580 | A_95_P016821 | EB681829     |
| 2984 | 36 | 9  | 593  | CACCGGATATTTGGGGCTGTGTAGTTTCATTTTATTTGACTTCCGCATATATTTTGT    | 2586 | A_95_P201752 | TA17490_4097 |



|      |    |    |      |                                                              |      |                           |
|------|----|----|------|--------------------------------------------------------------|------|---------------------------|
| 2999 | 36 | 24 | 0    | GAGCTCCCTGCTCCTTTCTTTGCTTTTATTAGGGATAATTTGCAATGTATTATTGCTG.  | 2615 | A_95_P265926 A_95_P265926 |
| 3011 | 36 | 36 | 435  | ATATCTGGAAGACTCATTATTTGACAAAACCTTTCAATAAACCACTGCGTTCATTGAGC. | 2638 | A_95_P104552 CV017065     |
| 3020 | 36 | 45 | 576  | CAGCGTTAATGAGTATGTAACGAGTTCCTCCATATAAGTGATGCCCGTATTATTGTTTT  | 2656 | A_95_P028016 EB443690     |
| 3022 | 36 | 47 | 320  | ATATGCTAAAACAAAGTCAGATTGTATTGCTAAGGCAGAGGGGACCTATGACAAGA/    | 2660 | A_95_P200922 FG644997     |
| 3024 | 36 | 49 | 126  | CTCTGGACATTCGGGTTACTTGGTACAAGTTAATAACACTTATGCTCTCTCTTATT     | 2664 | A_95_P033259 AJ344589     |
| 3025 | 36 | 50 | 705  | TCTGAAAAGTATAGTGATTGATGGAGATACAACCTGTACCCGTTTACACGATTCTTGAC  | 2666 | A_95_P127812 EB427384     |
| 3026 | 36 | 51 | 110  | TGTTGTGGAGTTCTGTACTAGCTTCAACTCCGGAATTTTTGCGGCTTGCCATACA      | 2668 | A_95_P242202 AJ719161     |
| 3028 | 36 | 53 | 290  | CTTAATCGTTTCCTTTTCGTTCTTTTTCTTAGTGGGATGGAGTCTGCTATTTGAGCG,   | 2672 | A_95_P077050 AM783661     |
| 3033 | 36 | 58 | 731  | TCCTTGCAAGGGAGAGGAAGCTCATCAAAAAGAATAATTTTGATATTCAGAGGTTTG    | 2682 | A_95_P126797 EB426152     |
| 3038 | 36 | 63 | 814  | GGGATGACAAAAGGGAATTAATTGGAACCTGGAACCTGTAGACCTAATAGGTTGTI     | 2692 | A_95_P100978 TA12699_4097 |
| 3046 | 36 | 71 | 425  | ATCAGTGTCAATGGACGATTGGATCTGGAGAGGGTTCAAGTAGTTTTGACCAAAACC    | 2708 | A_95_P052446 BP132926     |
| 3048 | 36 | 73 | 710  | AAATTTAAACCACAGATAAGTGAATTTGTTTATCAAGGTGAAGAACCCGTTTCTGGT/   | 2711 | A_95_P150902 EB681052     |
| 3057 | 36 | 82 | 370  | TACTTTAGATAACGTGTTTATGCAAAGCATGTCCTGTTTTCTATTGACCTGAACATCC   | 2729 | A_95_P040221 BP129769     |
| 3058 | 36 | 83 | 1077 | TGATCTTATATGAGATGCTAGAAGGTGATCCACCATTATCCCACTATGAACCATATGA   | 2731 | A_95_P008056 TA15653_4097 |
| 3059 | 36 | 84 | 1122 | TTAGGTCTAGTTTGGGATAAATTCATTGTTGATGGGGATGGATTTAGACACTGTTAATI  | 2733 | A_95_P017346 TA14303_4097 |
| 3062 | 37 | 2  | 325  | GGTTTTTTGCCCTTTGGGAAGCTATAGACAATCGGGTTTTAAATTAATCCAGAAAAA    | 2736 | A_95_P113562 CV021194     |
| 3071 | 37 | 11 | 623  | GCGGCATCAAGCATGTATTGTGCGATTATTGTTGCTTCTATATGTTTATTTTCTCTGG   | 2753 | A_95_P090088 TA16335_4097 |
| 3072 | 37 | 12 | 294  | TGCATCCCACTCGGCTCTTCTAGTTAAGCAACATAAGTTTCATGTTTTCTTAAATACT   | 2755 | A_95_P157992 EH616031     |
| 3073 | 37 | 13 | 586  | CAGTTGCTTTCTTGCCCAATTAAGCAAAATGTAATGTTTTGTGCCTGGAAGATAAA     | 2757 | A_95_P280808 FG635057     |
| 3074 | 37 | 14 | 141  | TGGCCTTAAGATCAGCTGCCCTATTCCCTGTTTCAAGGAAGCAAAACCTTGACATCAC   | 2759 | A_95_P105292 EB438050     |
| 3077 | 37 | 17 | 1075 | TAGGAGCACATTGTCTCCTGAACCTTTGGAGCAAATATTTTCGTGATTGTTGGGTGCT   | 2765 | A_95_P190027 TA14917_4097 |
| 3079 | 37 | 19 | 449  | CATGAAGGACTGCTTTGTAATTAATTTGTTGAGTGTTATTTGTGTGGCCTGTATATG    | 2769 | A_95_P033439 AJ632746     |
| 3082 | 37 | 22 | 342  | AGCCACGTGTCTAGTTTGTTATGAAGTTGATTCTGCCTATATTTATATTCCTTGACTC   | 2775 | A_95_P133192 EB434485     |
| 3088 | 37 | 28 | 682  | TTTCGAAGTATGTAGAAGACCATAGTTGCTCTGCTGATGTGCTTCAGCCTGACCAACA   | 2787 | A_95_P138707 EB442425     |
| 3091 | 37 | 31 | 1319 | GGAGCATGGTCTTTCTTGATTTACTATATATGCAGGTCCTCTTAGGGATATTATATG    | 2793 | A_95_P250337 AB041514     |
| 3095 | 37 | 35 | 905  | CATATTGTTTGAATTGTAGCGAACCACACTGGATTTTGAGAACATCTGTTGTTGTTA/   | 2801 | A_95_P253654 DV161692     |
| 3099 | 37 | 39 | 496  | GTATCAATGGTTTTCGGTTTCTCATCTTAGATTTGGGAGCTGAGATTTAGTGTATTTA/  | 2809 | A_95_P153677 EB683895     |
| 3101 | 37 | 41 | 1366 | GAAGGGGATGGTTAATGCTTCAGCTGTATTTATCAGTTGTTTGAGAAGATCTATAT/    | 2813 | A_95_P011416 TA12493_4097 |
| 3102 | 37 | 42 | 1379 | CTCTGAATGTTTTCTTTGCAAGTGGTGGTGTATTGGATATTTAATGGCTGTTTGCAGCC  | 2815 | A_95_P002656 TA16132_4097 |
| 3111 | 37 | 51 | 330  | ATATCTCCGATCTCGATTACGGCGTCTCAAATGAGGATATCAAGGAGCTCTTCTCCAA   | 2833 | A_95_P102547 CV016069     |
| 3112 | 37 | 52 | 413  | TTTGGGCATTCTGAATCTTGTACTGAGTTTTGAGTTTGAAATGAGTTCATAAACACTC   | 2835 | A_95_P187742 FG125349     |
| 3116 | 37 | 56 | 578  | GGACCTACTGGTTGCTACTTTGATCATACTGGTAGTAGCCGAAGTTAAGATCCTGTT    | 2843 | A_95_P102327 EB681115     |
| 3118 | 37 | 58 | 450  | ATGGTCTTTTGAACTTTTGTGCATTCCAATCTACTCCAGGAATGGAGTCTGAAAAAA    | 2847 | A_95_P156602 EH614327     |
| 3120 | 37 | 60 | 847  | ATAGGGTTGGAAGAGTTGCGAGAAGCACTCAAATACTACTCCATAGAGTCGACAGCTC   | 2851 | A_95_P242602 EB427401     |

|      |    |    |      |                                                              |      |                           |
|------|----|----|------|--------------------------------------------------------------|------|---------------------------|
| 3124 | 37 | 64 | 271  | TTTCAGTTAAACGCTTTAGTTCTCTTTACTTATGTTGATGGCTTCTGATCTTCTGGCAA/ | 2859 | A_95_P183927 TA13571_4097 |
| 3130 | 37 | 70 | 540  | CTTCTTTATGTTGGTAAAACCTGCTGGTTACCATAGCAGGACTCAGGAAGAAATTCATC  | 2871 | A_95_P051126 DV161248     |
| 3136 | 37 | 76 | 503  | AGGTTCAAGCATTCCGATTCCAGTTTGGCATACTGGATGGGAAGCTTTAGCGTGTATC   | 2883 | A_95_P088268 BP530000     |
| 3144 | 37 | 84 | 2532 | CACCTGAATTTTCTGTGCTTTTTTCAGTTAATTGCAGATGCAAGCTGAAAATTTAACCC  | 2899 | A_95_P182947 TA13342_4097 |
| 3145 | 37 | 85 | 131  | TTAGAACAGGCAAAGGATGCATTGGCCAATCTTGAAGTTCGGTGGGTTGCGTTATT     | 2901 | A_95_P158182 EH616253     |
| 3146 | 38 | 1  | 882  | CAGTATATGCTCACTACTTTTTGGCTTATATAAATGAAGGGACACTCTGCCTTCTAAA/  | 2735 | A_95_P008396 AB079024     |
| 3153 | 38 | 8  | 2218 | CCATGTAAGATTGACAAAATGTGTACGCTTTCTTATCTCTATAGTTGGCTCATATCATC  | 2749 | A_95_P237724 AB004797     |
| 3155 | 38 | 10 | 290  | CTCCGCTCCTGCGACTAAGAATTCTCAACTATATGTTTGTACATAAAATGCATAATGA/  | 2752 | A_95_P155337 EG650018     |
| 3157 | 38 | 12 | 670  | AAGAAGAGCAGGAAACATCATGTAGGCACTGCGGTATTAGTTCGAAATCCACTCCTA    | 2756 | A_95_P028876 TA15643_4097 |
| 3159 | 38 | 14 | 753  | TGACTATAATTAAGTTGGTTGGGTGCTTTCGCTAGTGCACAGCCTTGCTTTTACTCA/   | 2760 | A_95_P198702 TA16835_4097 |
| 3160 | 38 | 15 | 1229 | CATCTTTGATGGCTTTAAGATAGCGTGATCGATTTTGCATTGTCAATGTCTAGTTATT/  | 2762 | A_95_P176842 TA11803_4097 |
| 3161 | 38 | 16 | 663  | TAGGCATATCAGTCACGAATGAGAGATCTGTGAATATGTTGCTATTATATTTACGCAC   | 2764 | A_95_P153427 EB449788     |
| 3165 | 38 | 20 | 481  | CATAATGCGATCCGTAGTGACAGCAAATGCTTCTCTCTTTATTGATGTTTGAATTGTA/  | 2772 | A_95_P035358 BP128453     |
| 3166 | 38 | 21 | 572  | TTAATTGACACAGGAGTCAAACGGCTATGCAAGTGCTGAATGCATTCCATTATTTCTA   | 2774 | A_95_P234179 FG645147     |
| 3168 | 38 | 23 | 729  | CAGAAAATTCAGTGCTCCGAAGCAAGCTCTTGGAACATGATAATCTTGTAAGATACA/   | 2778 | A_95_P302058 FG194027     |
| 3169 | 38 | 24 | 261  | CATCTAGCTTCGACCCTCAAATGTTTTAGAAAAGCGTGGGTTGTTTGTCACTTGCAG    | 2780 | A_95_P071340 FG642353     |
| 3170 | 38 | 25 | 765  | GATGCTCAAGGATAATATTGGAATGTATGCCAAGTTTACCCAGCAAATTCATTTTGC    | 2782 | A_95_P164742 EH624051     |
| 3173 | 38 | 28 | 127  | ATACTGTCAAGCAAATTTAATTCTACCACATAGGTGGGTGCGGCAGCATTTTCGCAC    | 2788 | A_95_P113257 CV021079     |
| 3180 | 38 | 35 | 900  | TTGGAAGATTTACCGAGCAAATAAGGGTCTTGTGAGAAATGCGAAGAAAGTGGGA      | 2802 | A_95_P145807 EU342421     |
| 3183 | 38 | 38 | 895  | TCGGTGTGATTGTAGCTGACAATTGTAGCTGTTTGACACAAAATAGAGTGACTAAGA    | 2808 | A_95_P186237 TA14082_4097 |
| 3189 | 38 | 44 | 988  | GGTTTTCCATTGGGACTGCATGTTGGGTAAGTTGTATCGTCTATTGGGACTGGAAA/    | 2820 | A_95_P193942 TA15779_4097 |
| 3190 | 38 | 45 | 583  | AATACAGCTTAAGGATGCTTTCACACAATTGAAGTGCAAGGACTGCTTCAGCACAC/    | 2822 | A_95_P254834 EH617724     |
| 3191 | 38 | 46 | 787  | GGGAAGCAAGTTTAGGTGGTAATGTAACTTCTTATTATGGATTAATTCGGCTTTAG/    | 2824 | A_95_P211407 DV157963     |
| 3194 | 38 | 49 | 683  | ATTTATTCATCCAATATGGGATGGTGAATAATATCCCCAGTCAATGTTTCCCGCTCTG/  | 2830 | A_95_P242822 FG636021     |
| 3195 | 38 | 50 | 623  | CATTCATGATTTGTGTTGTTAGCCAGGGGCTTATAAATTATAGCTCCATTTGTCAAAT   | 2832 | A_95_P062030 BP135410     |
| 3196 | 38 | 51 | 703  | TTGGCTGAGGTGGATTTAAAATTTAAACGTACGTCCAACCTTTATATTCTCACTACAA/  | 2834 | A_95_P178707 TA12325_4097 |
| 3198 | 38 | 53 | 774  | ATGGAAGCCTATTGCCGGCCTCTGTGATATCTGTTTACTGTGCTTATGTTTGTACAC/   | 2838 | A_95_P253969 FG125331     |
| 3203 | 38 | 58 | 364  | TAAGATTAGTTAACTGTCAAGGCATTGCTGTAGAAGACCAGGCTCCCGGAATTCACC    | 2848 | A_95_P115712 FG644328     |
| 3212 | 38 | 67 | 406  | TAATGTTGGAAAGCTATTGAGTATTCCTTAATTTATTTATGGGGAGCCAGTGGCTGT    | 2866 | A_95_P132482 EB432975     |
| 3223 | 38 | 78 | 702  | AGCTGCTGACAATGGAAGACATTCTCTGTACATAAATCAATTTAGCAAGTATTTTCGTT  | 2888 | A_95_P117907 DV160875     |
| 3228 | 38 | 83 | 850  | GATTTGTTTGGCCAATATCATGGGAGGATTTACCAGTCTTTTCTTCCGGGGTGAATT    | 2898 | A_95_P180712 TA12811_4097 |
| 3232 | 39 | 2  | 603  | GAAACTAATTCGAGGCGATAACAGGCTATGTCAGGGGTGCTGATGTCCATTTTCATA    | 2904 | A_95_P004746 FG176614     |
| 3233 | 39 | 3  | 588  | TTCACTGAGAGGCTTCTTTCTTGCCTCTTATGTTGATAAGCATATACTGTGCCTTCGG   | 2906 | A_95_P236189 BP133167     |
| 3237 | 39 | 7  | 531  | GATGTTTTGCATAAGCTAACATTGATTATAAATGGTCAATGGATGCCCCATTTTGTG    | 2914 | A_95_P029381 DW003030     |

|      |    |    |      |                                                            |      |                           |
|------|----|----|------|------------------------------------------------------------|------|---------------------------|
| 3238 | 39 | 8  | 184  | GAAATCCATAGGCTTTCAGTTGTTTAGCAGCATGGATATAGATCTTCGGCTGCCTTCT | 2916 | A_95_P127507 EB427025     |
| 3240 | 39 | 10 | 82   | CGCCTTTTTCTGTATTTCTGGGGTTGTTTGATTGACCATATTACATATAATCTCAGTA | 2919 | A_95_P013211 EB446083     |
| 3241 | 39 | 11 | 1382 | ATAGCATCCACCACCTGTAATTGGTGACTCATTAGTTTGCAGGGAATAAGAGTTTAA  | 2921 | A_95_P123412 X96727       |
| 3242 | 39 | 12 | 765  | TGACACAAGAACTCCATAACATAAGTAGAGCTCCAGGTATCTCCGGTGATTGACTG   | 2923 | A_95_P147237 EB451503     |
| 3243 | 39 | 13 | 806  | GCCTGAATGTTGGTTATTATTGTACTACTATGCGTCCAAGTTGTAATTCTAAGGAAA  | 2925 | A_95_P010341 TA13001_4097 |
| 3244 | 39 | 14 | 304  | TAGGTCAAAGGGGGTCTGTAAAGTACCTTTGCTTATGCCTTATGTCAAATTTAATGTA | 2927 | A_95_P084360 BP528997     |
| 3247 | 39 | 17 | 732  | ACAATCAGTGATGGAAGGATATTCTCAAAGGATATGGGGATCGCTTGGCATAAAAC   | 2933 | A_95_P162097 EH620870     |
| 3248 | 39 | 18 | 232  | CTTCGATTTTAGTTGTTGTTGTATCCTAGTCTACGACTAAATCTGTCCTCAGCTTATG | 2935 | A_95_P027856 EB442502     |
| 3251 | 39 | 21 | 461  | CTGGCCATGTTATTCATGTAACCGTAAATTCGAAGGTTGATACAAATTTGTTAAATCT | 2941 | A_95_P005591 TA14421_4097 |
| 3262 | 39 | 32 | 930  | ATTGAATTGTGACGATTAGTCTAAAATGATCCAGCAAGCAATTGTTGGGATTTCTTT  | 2963 | A_95_P222892 TA22130_4097 |
| 3263 | 39 | 33 | 722  | ACTGGGCAGGCATTGCTTAGTTTTGTATGAGATGTTTGTAGTAAATGGAAAAATG    | 2965 | A_95_P012556 TA13220_4097 |
| 3277 | 39 | 47 | 1454 | AAATGCTATCTGGCGTTATATTCCTTAATTCAGTTGGCAAGTTCTAGAAATTCAGTG  | 2991 | A_95_P192007 TA15360_4097 |
| 3282 | 39 | 52 | 409  | GAAAGAGAGTGGAAAGTCAATTCCTTAAGGACGTAAAGCCATGGGATGATGAAA     | 3001 | A_95_P103947 CV016769     |
| 3283 | 39 | 53 | 549  | AGAGAACTAATATTTTCGGGAGATACTAGAGTACCATCCTCAGCTTCTGAAGGACTAC | 3003 | A_95_P164402 FG151562     |
| 3285 | 39 | 55 | 1307 | GGAAAAAGAACGAAGTCAATAATTTCTGGCCAGTCTATGTTTTGTTCCCTTC       | 3007 | A_95_P180357 TA12723_4097 |
| 3287 | 39 | 57 | 578  | TGAGTGAATGATAACGTTTATCTAAGTAAAGGGACTTTTTGGGGGATAGCTTTGTT   | 3011 | A_95_P161392 EH620136     |
| 3288 | 39 | 58 | 578  | TTGCTGGCTGTGAGAATTTTGCATCAAGAATACAGAACTAGTATCTGTTTCTACTGTT | 3013 | A_95_P179042 TA12415_4097 |
| 3290 | 39 | 60 | 955  | CTTCTCCTTTTCAGGCTTGTAGATTACTGTCTTGATTCATATAAGAGAAGAGCTTGT  | 3017 | A_95_P176187 L29271       |
| 3293 | 39 | 63 | 826  | GTCTGATGATGAGTGACTTGTGACGATGAAGTTTATTTGTTGTCTGTGGGTCAGCT   | 3023 | A_95_P126482 EB425800     |
| 3296 | 39 | 66 | 921  | CGCTGTTCACCTTTTTGTTGTTAAGATGTGCATTTTCATATAGAAATCAAAGAAAGCA | 3029 | A_95_P016346 TA13728_4097 |
| 3298 | 39 | 68 | 566  | TTGGAATACTTGTGAAGGTAGCAAAAGGGTTTGTGTCGGTTCAAATCAACCTTTA    | 3033 | A_95_P068170 BP137067     |
| 3299 | 39 | 69 | 795  | ACTAAAGACAGCTTTGGAAATGCTAAGACTAGCATGCACCCTCGAAGAAAGTTTGCC  | 3035 | A_95_P299388 FG172777     |
| 3302 | 39 | 72 | 635  | ATATCTGAACCTGATTTATTGTACTTTGTATGAGTTGCACAGTGGCCATTTGTAGTGC | 3041 | A_95_P270277 EB445989     |
| 3304 | 39 | 74 | 622  | GGCGGTGGTGACTGCGTACATGCTATTGATTTGATTTTTACTCTGGTTATTGTTTATT | 3045 | A_95_P181307 EB683516     |
| 3309 | 39 | 79 | 664  | AGATTCAAAAGCCGATGCTTGGAGAGCTCTTGGACTGTCTGTCTACACAAGATATT   | 3055 | A_95_P275003 FG192759     |
| 3315 | 39 | 85 | 293  | TTCCACCCAAAACATCAACAGCAATGGTAGCATATGCCTTGACATTTTGAAGGAACA  | 3067 | A_95_P114207 FG636798     |
| 3316 | 40 | 1  | 377  | CCATTC AAGTTCTGTCCTAATTTGGAGAAGGAAAAAGTTGAGTATTCTAGCCAATGG | 2903 | A_95_P131752 EB432143     |
| 3320 | 40 | 5  | 668  | GCAGTAGAGATTGATATAAAGTAGATTATGAGCTCTCCTATGACCTATCTATCTTGCT | 2911 | A_95_P232314 FG641881     |
| 3330 | 40 | 15 | 538  | ACCAAATAGATGGGTTTTTACCCATGCAGTGACTTCCCTTTTCGTTTATACTGAAATT | 2930 | A_95_P057036 BP134112     |
| 3341 | 40 | 26 | 839  | ACAGACATAGACCCGATCCAAACCAAGATTAATTCTTCTGCTAATACCCTTGCCACTA | 2952 | A_95_P309753 FG172772     |
| 3344 | 40 | 29 | 410  | CGTTCCTAATCCATACCCTGTAGAATTTTAGTAACTCTGTAGTAGCTCATGACTTGT  | 2958 | A_95_P092528 BP531845     |
| 3345 | 40 | 30 | 648  | GTTTGGAGAGGAACCTTGGCATGGATCCAAGTGACCCAATTATTCCGTTTGTCTTTT  | 2960 | A_95_P214587 FG136377     |
| 3348 | 40 | 33 | 763  | CGGTGTTTTTAGCAGAATAAAGGGGCGCTTAATGTTTGTCTCGAAGGAGCTGATGTC  | 2966 | A_95_P180542 TA12769_4097 |
| 3356 | 40 | 41 | 728  | GATCTATGCAAGAAGAAAGGAGCGTGAATATTTTGTACCAGTCCGGACTATGGGC    | 2980 | A_95_P297028 EB680938     |

|      |    |    |      |                                                              |      |                           |
|------|----|----|------|--------------------------------------------------------------|------|---------------------------|
| 3358 | 40 | 43 | 481  | GCTTGGATTTCTCATTGTTAATGCATTGAAGATGCTTTGCCTACCAGTGAAGGTCCT    | 2984 | A_95_P275138 AM804984     |
| 3361 | 40 | 46 | 863  | GAACTACTTGCCATTTGTACAGCTGAAACAGTTTGAGCACTGCTGCTCATGATGCATT   | 2990 | A_95_P253574 FG177904     |
| 3364 | 40 | 49 | 834  | TTTCAGAGATAACAGAGGAGAATGTAAGCAACACGGTGAGAACTTGGTGAAGCC       | 2996 | A_95_P220837 EB424748     |
| 3366 | 40 | 51 | 796  | GGATATGACTCCGTGGTGCCCTTCCCGTGAAGATTAATTCAATGAATAAAATAATTAC   | 3000 | A_95_P146457 EB450511     |
| 3369 | 40 | 54 | 701  | TGTAGATTCTCCCAAAGGAGGATTAAGAGATTCCACTTTTTATAGCTGAGATCTTTTT   | 3006 | A_95_P029031 TA17801_4097 |
| 3373 | 40 | 58 | 300  | CTTCTATTATGCTTAGAGGCTCTCTAGACAGGTTGTGGGTGGTGTGGTGGGA/        | 3014 | A_95_P160977 EH619674     |
| 3374 | 40 | 59 | 803  | ATTTGCTGAAGCAGCTTAATAAAACCAATGACCCTACATTACCCCGTTCTACAGCTG    | 3016 | A_95_P188467 TA14577_4097 |
| 3375 | 40 | 60 | 647  | GAGGTTGCTTCAGAATTGAAGAAGTTTCACTTGCCTGCAAAAGTTGATATTATCAGT    | 3018 | A_95_P210502 TA19411_4097 |
| 3377 | 40 | 62 | 960  | AGGGTTACATTTTACTCGGTTTGACAGACGCTATGGGATCAGTATAACTAAAAAAA`    | 3022 | A_95_P129452 TA18724_4097 |
| 3378 | 40 | 63 | 788  | ATAACTGGTCTTAACTCTTACCCAACCATTGCATTTCTGTTTGTAAAAGTTTACAGAAA  | 3024 | A_95_P017336 EB425231     |
| 3386 | 40 | 71 | 0    | TCCAACCCTCCCCGAATTCGAGCGTCAACTGCATCTCTATTTGAGATTTATGAAAAG,   | 3040 | A_95_P285233 A_95_P285233 |
| 3388 | 40 | 73 | 1696 | GACATGTATAATGAGTTATATACTTTTTTCAGGTGACGTCTTTCCGTTCTACTTGACAT  | 3044 | A_95_P198987 TA16896_4097 |
| 3389 | 40 | 74 | 420  | ATATGTACAAGACCGATAAAAAGCAAGTATGAAGCCACTGCTCGGAGCTGGACTCAA/   | 3046 | A_95_P106047 EH619487     |
| 3392 | 40 | 77 | 831  | TTAAAGCAATAAAGGAGAGATCCAGTACACCTAAAGCGCCTCGTGATCCGCGTTTAC    | 3052 | A_95_P030566 EB680520     |
| 3400 | 40 | 85 | 261  | CACTTGTTTCTGGTGCTATTGGATCATGTTTCAGTATTGTTTGCTAAGTCTTTCAAAC   | 3068 | A_95_P242547 DQ460173     |
| 3402 | 41 | 2  | 706  | TCACTGTCCAAATGGTGAATAATCCCCAAATGGTTGGGACATTAGGCTATGCCTTAA/   | 3071 | A_95_P054096 BP133353     |
| 3407 | 41 | 7  | 635  | CATGAAATGTAATTGGTCGTTGCAACAAATCACCTATATACGTTCTAGTACTATCTAC   | 3081 | A_95_P000966 FG638726     |
| 3411 | 41 | 11 | 1035 | TGGCAAAACAGACGAGACTCACGGATTTTGGAACTTTCTGCATTTCTTTCCAATGTAA   | 3089 | A_95_P026766 TA18491_4097 |
| 3412 | 41 | 12 | 719  | AGCTCGTTTTCAACTGATTCTTGATTTTGTCTTTCTTACGGCGTAAATTCAGTTGTCT   | 3091 | A_95_P032906 AF197568     |
| 3416 | 41 | 16 | 314  | TGCATCAAACCTGGAGGCACAATTTCTTAGAGTCTTCTTTGCTGTATCTGTGAGACCTA  | 3099 | A_95_P106167 FG640961     |
| 3419 | 41 | 19 | 520  | CTCTTAAGGATACGATATCTCAGAAAGATGAGGAGATTGAGAAACTGCAGTGATCA/    | 3105 | A_95_P085145 BP529206     |
| 3420 | 41 | 20 | 783  | ATTGTTGCTACCTGCTAATCTCGTCTGCATGAAAAGCTCTGTTTCTGCATTATAAAGA   | 3107 | A_95_P013776 TA12614_4097 |
| 3426 | 41 | 26 | 742  | GTTTGTAGTTCTGTTAATTGCTAAAATTTGTGTAGTTTAGCTCTCTGCATTGACAAGTA  | 3119 | A_95_P012371 TA15245_4097 |
| 3428 | 41 | 28 | 1601 | ATAACGTTATTTTCATGTTTCTTGATCCTATCTCGGGATGGAAAACCTATAATGTTGCT  | 3123 | A_95_P041432 TA13097_4097 |
| 3434 | 41 | 34 | 436  | GTATTTGGACCATTATATCTGAGAGTCCATTCAAGGGCCAGCTACTTGGTCTTACTTA   | 3135 | A_95_P203573 FG643084     |
| 3435 | 41 | 35 | 142  | TATTAGGATTGCGATAAGCTGATTTTTTGTCTAGCTCCGGCGCTCGATCTTGGCAAC    | 3137 | A_95_P058386 BP134463     |
| 3440 | 41 | 40 | 356  | TGACCTGCTTTGACAGGCCAGAATGAATTTTCTTCATCAGTTTAAAGTGTGTCATTTAA  | 3147 | A_95_P180847 EH618138     |
| 3441 | 41 | 41 | 667  | CCTGGTGTGGTTGCCTCATATATTTGATACTTACAAAGTCTTTGCAATGAATGCATTC   | 3149 | A_95_P287823 EH620884     |
| 3442 | 41 | 42 | 648  | CACTCAGAAGTTACATCGCCGATCGCTCTTAAAGATCTACTTATTGCTAGCACTCCA/   | 3151 | A_95_P300273 FG637378     |
| 3444 | 41 | 44 | 460  | TCCAATCATTGTACCTGTAAATGTGCACCAGATGTTATAAACTTGGTAGTGTACATAC   | 3155 | A_95_P154022 EB684183     |
| 3447 | 41 | 47 | 715  | CTTATTCTCGGAAAGCTTCAAGTTGGATTGTGGAAAGATTCTGTCCAGATTATA       | 3161 | A_95_P239139 AJ344536     |
| 3452 | 41 | 52 | 297  | ATTGTCTAATTATTTTTCTTTTCTTGGTTTTAGTCGAGATGATGAGTTGCCACCTTG    | 3171 | A_95_P124562 TA20094_4097 |
| 3454 | 41 | 54 | 346  | ACCGATTTTCAGAACTTTGTAGATACTGCGCTGCTTCTATTGCTCTTGTGGTGGACAG   | 3175 | A_95_P090453 BP530961     |
| 3455 | 41 | 55 | 756  | CGGTTTCATCCCTGTTACTACATTTTCTTTCCAATCAAAAACCATAAAGCGTTTTATTTA | 3177 | A_95_P020621 TA21510_4097 |

|      |    |    |      |                                                               |      |                           |
|------|----|----|------|---------------------------------------------------------------|------|---------------------------|
| 3459 | 41 | 59 | 529  | TTAGCACAGTTGAAGAACTTAGATTTTGCTTTAAAACTTGCTTGAGGCTGACATTGC     | 3185 | A_95_P018611 TA15760_4097 |
| 3460 | 41 | 60 | 630  | GTGGGATAGCTTTGTTGAGTTTATCTATATTGAGACTTCTTTTCGTGCAAGGTTTGG     | 3187 | A_95_P116172 DV158743     |
| 3464 | 41 | 64 | 374  | GGGCTGTGTTAAGATGAGTTTGTTTTACATGTGTTATGTGGTGATATAATTGTTGTGC    | 3195 | A_95_P143207 EB446547     |
| 3470 | 41 | 70 | 734  | GAAATCCAGTTTCTACGTTCAAAGTAACATTGCCGGTCTTGACTTTTTCTAGAGCTTC    | 3207 | A_95_P163042 EH622055     |
| 3477 | 41 | 77 | 816  | CTTGTGGACTTGTCTGCAAAATCCTTACAGCTAGATGTATCTTCTTTTTCTTGATTA/    | 3220 | A_95_P001106 EB443952     |
| 3478 | 41 | 78 | 505  | ACAAATGAAAAGTCTTACCTTCTTGATAACAATGCTCAAGATCATCTTCTGTTAGTG     | 3222 | A_95_P082985 BP528645     |
| 3480 | 41 | 80 | 519  | ATCAGTGACTTTGACCTTGACCTTGACCTATAGTAGTGAGTAGGCAAATTTACCAT      | 3226 | A_95_P083640 BP528812     |
| 3482 | 41 | 82 | 923  | ATGGTGCCAGTCTCTAGTAAGGCCTCGTATGCGCTCATATATGTGAATTTCAATAGA     | 3230 | A_95_P195007 TA16025_4097 |
| 3486 | 42 | 1  | 290  | CCAGTTTGAGTTCAGAAGAATTTGTAATGTATGTAAAACCTTGTCAAAATCGGAG       | 3070 | A_95_P094163 BP532589     |
| 3491 | 42 | 6  | 807  | ACACATGACCAAGCTCTGCACTTGTGGAATTGCAAATATAACTCGTTGCAGTCA        | 3080 | A_95_P289118 DV157762     |
| 3496 | 42 | 11 | 856  | ATAATGAGTGGGTTCTTGCTACAGCATCATCAGATAGTACTGTCGGTCTGTTGACAT     | 3090 | A_95_P269961 EB428345     |
| 3497 | 42 | 12 | 379  | CATGGTGGGTTGCAGTGCTCTTCTGTATCGTGTCAATATTATAACTAACCACAAT/      | 3092 | A_95_P075800 BP526819     |
| 3499 | 42 | 14 | 1523 | AAACACTATCTGCTTTAGAGCGTCATGAAGAATCTTCTTCTTTGTCAGATATCCT       | 3096 | A_95_P196582 TA16370_4097 |
| 3501 | 42 | 16 | 705  | CAACTACTGCGCACTACCACATTTTAAAATACTGTTATTGAGGCTATCACAATTGTTGT/  | 3100 | A_95_P204557 DV158965     |
| 3506 | 42 | 21 | 454  | GAATACATAGCAGAGGTTTGTGTATTAGCCAGCCTATTCATCCCATTTATTATTATGT    | 3110 | A_95_P161212 TA17504_4097 |
| 3507 | 42 | 22 | 805  | CGGTTTGAACCTGCGTTTAGAGGTCAATATTGAGGATTTGCTGATTATAAACATGTTT    | 3112 | A_95_P258601 DV162530     |
| 3508 | 42 | 23 | 1411 | ATTGTCTGACTTTGATTTACAATGCTTGTCTGGACGCTGTTGATAAGCATGTAATAA     | 3114 | A_95_P003836 TA12877_4097 |
| 3509 | 42 | 24 | 643  | TGCCATGGACTGTTGAAATTTGTAATACTCAAATCAGATCTCTTAGGGCTGTTAATTGATG | 3116 | A_95_P293768 FG635385     |
| 3513 | 42 | 28 | 223  | GTGCTTAGCATGTTGTAAATAGACAAGAATGTCAAATCTATCAGTGCAAAGCAATC/     | 3124 | A_95_P139082 EB442786     |
| 3521 | 42 | 36 | 768  | AATTACTTTGAGATCTGGTTAGAGCACTGGAGATGTCTTGCAAGATGTGGATTCCAG     | 3140 | A_95_P228304 FG167556     |
| 3528 | 42 | 43 | 186  | TCCATCAGTTCATAGCCAGGAAATGTTCAAGATGGAAGCAACAATATGTTAAATATT     | 3154 | A_95_P002331 TA21758_4097 |
| 3529 | 42 | 44 | 0    | ATCAACCTTATCAAATATGGGGTACTCGGCCTTGAAGCGAGTGCAAACCATGTTCTG     | 3156 | A_95_P241639 A_95_P241639 |
| 3532 | 42 | 47 | 687  | GGTTGTTTCCATGTCTGCACTTCACTACATTACCCTTCTATTTAAATGAAAGTAGTA     | 3162 | A_95_P213172 TA19992_4097 |
| 3539 | 42 | 54 | 406  | TATTCCTGATCCATTGGCGGTCCCTGACGTATCGACTAATTCGGCGTCAATATAGTT/    | 3176 | A_95_P271746 AM791353     |
| 3540 | 42 | 55 | 685  | GGAGATATGTTTAGCAAAAACAGTGAATGCATATTTGCTATCCCTTGGTCTAGTTA      | 3178 | A_95_P291668 DW005231     |
| 3544 | 42 | 59 | 581  | CTACCACAGATAGTGATTCTACTTAGTATACTTGACGTGCTATGTAATGTCAAAGTGC    | 3186 | A_95_P211287 TA19577_4097 |
| 3549 | 42 | 64 | 856  | TTATTTTGCATTTTATGTGGCTTCATGTGGGAGCTATTTGCAGCTCGTCTATGGCC      | 3196 | A_95_P259031 FG138736     |
| 3553 | 42 | 68 | 619  | ACTAATGCACGGGTTGCTTGTTTCAAGTATCATGTCTTTGGGAGTCTGCATTGTAGCAT   | 3204 | A_95_P301358 FG634200     |
| 3558 | 42 | 73 | 806  | GTACGGTGCAGCTCCCTGTATATGAGTAAATTTTTGTATAGTTTTAGATAGCTGATTC    | 3214 | A_95_P122492 DW002464     |
| 3573 | 43 | 3  | 516  | ACTTCAGATACTCAACTCGAGGCCATAGGATATCCTTACAGCAGCAGATTGAGATT      | 3242 | A_95_P032151 BP128511     |
| 3577 | 43 | 7  | 523  | AAAGCTTCACCTTAAGGGGTTTTGTGCATGGAGATGTGAAGCCAGAAAACTTTTT       | 3249 | A_95_P162267 EH621204     |
| 3580 | 43 | 10 | 648  | AATGGTTTTGAAATCTGCTGGATGGGTTCTAAGTGGTAAGCATTTTAACCATTGGG/     | 3255 | A_95_P016101 TC50020      |
| 3581 | 43 | 11 | 780  | TTCCCTGTTGACTTTGCCTTCTTTGATGAGCAGTACCCCCATTTCTTTGATAAGGAGT    | 3257 | A_95_P312538 FG150405     |
| 3583 | 43 | 13 | 240  | TTGGTTACCTGTCTGACATGCTACTTCCCTAACTTTCCCAATTTGCATGACTAGTTGG    | 3261 | A_95_P029806 CV019868     |

|      |    |    |      |                                                             |      |                           |
|------|----|----|------|-------------------------------------------------------------|------|---------------------------|
| 3589 | 43 | 19 | 370  | TGTTAGGATTGTAAGGCATTTCGTTGACAACCTTATCGAAGATCCAGCATCACTTGCT  | 3273 | A_95_P091603 BP531431     |
| 3600 | 43 | 30 | 708  | ACTTAGATGGTCTTTTTTCAGGGCTCGTCCTTCTCAGATTCTATAAATCTTTTGGGTCT | 3294 | A_95_P068405 BP137120     |
| 3602 | 43 | 32 | 675  | AGGATCGTCCAAGGATTTGCTCTAGAGACGCGAGAAAAATCATGCTTCATGCTTTTG   | 3298 | A_95_P223732 EB684141     |
| 3603 | 43 | 33 | 385  | TTAGGTGTTCCACCCGCAAGCCCTATGAACCTGCATTTTGAATTCCTGTGTCAAATAA  | 3300 | A_95_P110667 CV019842     |
| 3604 | 43 | 34 | 1476 | CATATGATAGGCAAGCTTGGATGCTTTGCTTCAAATTTGCCATCATTTCTCTACATTT  | 3302 | A_95_P013611 TA15009_4097 |
| 3606 | 43 | 36 | 412  | TACCCATTGCAGATGCACCTCCTGAAGATGAAGCTGCCTTTGCAACATTTAAAGGCA   | 3306 | A_95_P041136 BP130016     |
| 3608 | 43 | 38 | 352  | TCTGTGGTTGTGTAATGTGAGTCTGTATTGAAAAAGATTGAAGCTAGTATTGGAGGT   | 3310 | A_95_P141797 EB445426     |
| 3609 | 43 | 39 | 1018 | CCTTCATAAATGGAAGGGGAGGTCCATTTGTTGGCTATAGTTTATATTTTACCTTAG   | 3312 | A_95_P032746 AF068724     |
| 3613 | 43 | 43 | 297  | AATCTACACCTGGGGACTCTTGGTCAGAGACTGAAGAAATAGACCGAGCTATTGCA    | 3320 | A_95_P136607 TA16023_4097 |
| 3614 | 43 | 44 | 446  | AAGGGTTGAAGAAGTTCAAGTATTTGTTGTGATATTCATGGTACACTAACGGGTCTG   | 3322 | A_95_P282703 AM833244     |
| 3617 | 43 | 47 | 462  | CAGAATAGTTGTTATGGCAGGGCAGGAAGCTCCACAATTACCAAGGACAAGAAGG     | 3328 | A_95_P086968 BP529679     |
| 3618 | 43 | 48 | 557  | CCATGAATTGCAGAAGCATGGGGAAGATTTGAACTTGCAAAACACAAAAACAACA     | 3330 | A_95_P141442 EB445170     |
| 3619 | 43 | 49 | 720  | AGTTGGACCATTTTCAAAGACCCAAAATTACACCATTTAACAACCTCCCCTGTTTTAG  | 3332 | A_95_P127852 EB427399     |
| 3628 | 43 | 58 | 777  | AGCATTGGCTGAAAATGAAGACATTGATGACATATTGCCATCGCCAGAGCTACCAAC   | 3350 | A_95_P145697 EB449444     |
| 3629 | 43 | 59 | 784  | GTTTGGACTTAGTTGAACACGTTAAGATATAATGCAAACCTTGATTCTTGTGTAGAG   | 3352 | A_95_P236304 EB449505     |
| 3631 | 43 | 61 | 824  | GTTATACCTTTTAAAATTTCTATGGGGGTCTGGATGGGGGAGAAGGGTGTTCACTG    | 3356 | A_95_P073290 BP526179     |
| 3632 | 43 | 62 | 824  | TCTGCATGTTGACGCATAACCTGTAATTTACATCTAAATTTAAATGCCTGTTAGTGCT  | 3358 | A_95_P011791 TA17964_4097 |
| 3633 | 43 | 63 | 443  | ACTTCTTTCAGTCTCAGATCATGTACTTGCCAATGTGGATGCCATGACGTTATAAAAT  | 3360 | A_95_P092448 FG638854     |
| 3635 | 43 | 65 | 561  | TCAAATGGTTCGTGAGCTTATTCAGAGCGTTACAGCAAAATCTGCGGCACCCATGAT   | 3364 | A_95_P117717 FG163875     |
| 3637 | 43 | 67 | 1670 | CTGTTCGAAGGGGAGAAAACATGGATAGCATTTTATACGATATTGCCTTCTCTTTTGT  | 3368 | A_95_P015786 TA13905_4097 |
| 3644 | 43 | 74 | 443  | AGCACGAAGGTGATGCCGTGCATGATATGTAAATGTTAATGCACGAAAAGTGATGT    | 3382 | A_95_P148002 EB643514     |
| 3651 | 43 | 81 | 399  | ATTACTCTGACTGTGCGATTTTGATTGGAAATCTGTTGTAGCTGCTAAGGACTGGACCA | 3396 | A_95_P125612 FS416721     |
| 3652 | 43 | 82 | 412  | GTTGGTACAGTTCAGATTATGGACCCAAGCAAGCTCTGTTTATTTGGTTATTAATG    | 3398 | A_95_P131102 FG638602     |
| 3656 | 44 | 1  | 1338 | AGAATATATGCAAAACCTGTGCCCGAACGACTGCAGAAGAGATTGCTTGTGGATT     | 3239 | A_95_P021111 TA14936_4097 |
| 3657 | 44 | 2  | 401  | CGAGGCCTCGACTGTTTCAGTTTGGAACTTATTTATTTGTTCCATCGAATATCT      | 3241 | A_95_P270606 EB433468     |
| 3661 | 44 | 6  | 843  | GACTTGTTAATGTTGGCGCTACCTTTGTTCCATCTATGCTGTTGACAAGCTTGAAG    | 3248 | A_95_P227589 EB428791     |
| 3664 | 44 | 9  | 777  | CTTTAATGAAGCTATTATAGAGGAACGGGAGCAGGGAATACAAGAAGTACAACAAC    | 3254 | A_95_P145382 EB449091     |
| 3665 | 44 | 10 | 11   | GAATGTGGAGGAATTGACATTGAAGAACTGGGACAAGGTTAAGACTATTTTCGTG     | 3256 | A_95_P161087 EB426400     |
| 3666 | 44 | 11 | 659  | AGATCCAATTTTGTGAAAAGGATCTTCTGTACCTATACTCTAGATATGTTGGCCTAGA  | 3258 | A_95_P300303 FG636488     |
| 3667 | 44 | 12 | 541  | TCTCGATCGGAAAAGAATCAAGAGAAAAAGAAAGAATCGGAATTGATCGATAGATT    | 3260 | A_95_P026466 TA17335_4097 |
| 3670 | 44 | 15 | 608  | GGTTGTCTTGTGATTTCTCTCCATCGATTATATAATAAGCCTGTTTGAATGCAGT     | 3266 | A_95_P243307 DV999315     |
| 3671 | 44 | 16 | 880  | TGAGTTTGACAGTGGCCTTTCCAGGGTGTGCTTTGGAAATGGCTTAAATTCACATG    | 3268 | A_95_P246472 EB679910     |
| 3674 | 44 | 19 | 926  | CACTTGTGTGATGATTCTTGAATTTGCATCTACTATGTGTTGTTAAAAATGTAACCGA  | 3274 | A_95_P007861 U64924       |
| 3678 | 44 | 23 | 1607 | GAGCTCAAGCTTTTCTGCTCATCAGATTTGTGTTGTAGCAAATTGTCTTGTTAAATG   | 3281 | A_95_P180902 TA12853_4097 |

|      |    |    |      |                                                               |      |                           |
|------|----|----|------|---------------------------------------------------------------|------|---------------------------|
| 3679 | 44 | 24 | 315  | CCCAATTGCTGATATTCCATAAAATTGGTAATTAGACCTTTATTTGTTATGGTGCGCTC   | 3283 | A_95_P032631 AB293952     |
| 3681 | 44 | 26 | 1993 | GGAGTCGTATATTGTTACTAATTCTTTGTAGGATTTGACATTCAAGATGCTGTGACA     | 3287 | A_95_P189352 X97913       |
| 3682 | 44 | 27 | 571  | CTTTCGTCGGCTCCTGTGCTTTGACGTTTTAACTGCATTTACTACCTTTTTATGGTTTTC  | 3289 | A_95_P123062 DW002976     |
| 3685 | 44 | 30 | 241  | GGCAGACTAGCTCCTTCGTCTCACATGATTTACATTTTCGTACATTAATACTACTGATGT  | 3295 | A_95_P142222 EB445748     |
| 3686 | 44 | 31 | 567  | TCCGATCCAATTTATCGTAATCGATTAGTTTACATGTAGGTTACCGTATTCTGAAACA    | 3297 | A_95_P236404 BP132634     |
| 3692 | 44 | 37 | 412  | CTTGGACCTCTAATGTGCCTGAGAATCAGCCTCTACTAATTTTGATATTTCTTTCAGAA   | 3309 | A_95_P273756 EH620104     |
| 3693 | 44 | 38 | 782  | TCAATGTCAAAGAGAATCCTGATTTGCATGATCAACACATGTATCCTAATGAGGAA      | 3311 | A_95_P219107 EB442007     |
| 3698 | 44 | 43 | 575  | GATATTGTTAACAGGGAGTCGAACCTTTGAAATCAGGATTATGGGGGAAAATCCCAC     | 3321 | A_95_P200772 DV159471     |
| 3702 | 44 | 47 | 418  | GGACTTGTTCTTTCCAATATAATGACTTGTATTGTGGTGCTTTCCCTATCAATAATT     | 3329 | A_95_P000291 EH616159     |
| 3703 | 44 | 48 | 824  | AACGGTAGAGAAAATGAAGCCTAACGTGTTGGTTTCGTGCCGATAGTTGATTCCCTACA   | 3331 | A_95_P233559 EB426457     |
| 3705 | 44 | 50 | 532  | GGAGAACCTCCAATTGCATCTCCAACGTTTGAGCATTTACAGTTAATCAACCACCAC     | 3335 | A_95_P051501 BP132663     |
| 3707 | 44 | 52 | 468  | TTCATACTAATGGATTCCATCTGTTTTGAATCATACACCCTTAGTTTAGAGGCCACTAT   | 3339 | A_95_P095248 BP533100     |
| 3708 | 44 | 53 | 789  | TATTTATTTCTTCGCACACATTTCGTCGATTTCGTTGTGAATTCTAAAGTTATAGTCGCTA | 3341 | A_95_P115902 DV158330     |
| 3711 | 44 | 56 | 821  | GTAACAGGCACTCAAATGTTTTATTCCCTGAGGTTGTAACATCATTGAAGCAGCTGA     | 3347 | A_95_P009266 TA18912_4097 |
| 3720 | 44 | 65 | 930  | TTGATGCTGGCGCCTTGAGTAACTTTCCAGGTCTTGAGGCTTACTGGAAATATCTTA     | 3365 | A_95_P026486 TA14276_4097 |
| 3724 | 44 | 69 | 898  | GTAGGTTATTAGAAATGTGGTGTAGGGCATCTCCAACCTTTACCCCATTTTGGTACA     | 3373 | A_95_P236999 DV999529     |
| 3727 | 44 | 72 | 452  | TTTGGCTGTGGATTGCTGGATGATTTTCTTTTCTGAGTGAGTCTTCTTCTCAA         | 3379 | A_95_P306783 FG636230     |
| 3728 | 44 | 73 | 664  | GCGGTGAACTTCCACTATAAACTAAGTTTTGTAAATGCAGATATGGAATCTATAGA      | 3381 | A_95_P003966 FG640581     |
| 3733 | 44 | 78 | 124  | GTGGATCAGTTAGATAGTAGGTTACAGTGATACTAATTTGACCCTTCATTTTGAT       | 3391 | A_95_P141857 EB445475     |
| 3739 | 44 | 84 | 486  | ATTACTAAGTTGTGGTTTGGCTGCTGAGATTTGAAATCAAACCCTGTGCATGGCTGT     | 3403 | A_95_P121947 DW002019     |
| 3741 | 45 | 1  | 403  | GATTATTCCTTATTTCCAGTGCTACTCATGGAAATCCCGATTGGTTATGTTGGCTGG     | 3406 | A_95_P096568 BP533679     |
| 3742 | 45 | 2  | 2340 | GCGGTATTACCAGTGTTCTTATCGCCATTCATCTTCTGTTTCTTAGTTTTACCTGTAAT   | 3408 | A_95_P217582 AY220483     |
| 3743 | 45 | 3  | 359  | GCTTGGCGAGAATCTTTAAGGTCCATTTCTAACTGTACTCTTCAATGTTTTGTATGA     | 3410 | A_95_P093868 BP532453     |
| 3745 | 45 | 5  | 1944 | TGCATGGCCAGTTACAAAAGTGAAGCTTACTACACCAGCGGGAACAGTTGAGTTTGAT    | 3414 | A_95_P114352 AF223573     |
| 3748 | 45 | 8  | 1462 | TTTGTACCTTAAAATTGGAAGGGTGTATTTATCCATAATCTATCGATTCTTGCTGCTC    | 3420 | A_95_P195537 TA16139_4097 |
| 3749 | 45 | 9  | 198  | GTTCAGGATATTTAAAGAAGGCGGAGGTTTTAAGGAACTTCGTCTTAATCAATCC       | 3422 | A_95_P007101 TC72713      |
| 3761 | 45 | 21 | 762  | GTTCTGGTCTGGGGGTTTGGTCATTTTTACATTTTTATTATCTCTACTTTGATGAAGGT   | 3446 | A_95_P012736 EB440145     |
| 3762 | 45 | 22 | 305  | AAAGCAGCAGTCAGGCGATTCTTCTAGAATTGTCACACCCATATTTGGGAGTCTTT      | 3448 | A_95_P038111 BP129180     |
| 3770 | 45 | 30 | 376  | GACTCATGGATTAGCTTCATATGTTGCTGGTCAAATTGATCGCACTATGAGTTGGAA     | 3464 | A_95_P111112 CV020059     |
| 3772 | 45 | 32 | 570  | CCAGGTGCAATATTGGCTTTTCTATGTAAATGAAGTTGTAGTGAATGTAGCCTTTTG     | 3468 | A_95_P132927 EB433720     |
| 3776 | 45 | 36 | 79   | ATTGTTGAGATGATACTTTCCCGTTGTGAATGAGGCATGTCGTGTTTTGGAAGACC      | 3475 | A_95_P088913 BP530270     |
| 3779 | 45 | 39 | 460  | GTACGGATGAAGATATTTACTATTAGTTTTTCAGCGCAAGTATATTGATCTCATGCAA    | 3481 | A_95_P097890 BP534246     |
| 3781 | 45 | 41 | 1899 | CATTTAGAGATAGCAACGCTTTTCTCAATTGAAATACAATGTGTAGTCCTTTAGACG     | 3485 | A_95_P176887 AB009881     |
| 3783 | 45 | 43 | 863  | CTCCCTAATGGTTTACAGAATTTGCGTGTCTATAATTTAAAGTGCTTGTGGTAAAGG     | 3489 | A_95_P029171 TA13947_4097 |

|      |    |    |      |                                                             |      |                           |
|------|----|----|------|-------------------------------------------------------------|------|---------------------------|
| 3785 | 45 | 45 | 2302 | CTGTGAAATATTTACATCAACAAGGTGGAGAGACCATTAGAGTTGGTTGCTCCGACC   | 3493 | A_95_P022741 TA11868_4097 |
| 3786 | 45 | 46 | 861  | TAATATATCGTGCTATTGTCTGTGAAATGTACTGTTTGGTCCATTATGCATTAAGCCT  | 3495 | A_95_P120117 DV999850     |
| 3789 | 45 | 49 | 615  | CTGCTGTTGCTAAGTGAATGAACAAATCTACTTTTGGGATATTGCTTGTACATCCTTC  | 3501 | A_95_P178982 FG146455     |
| 3802 | 45 | 62 | 338  | GTAGAGTTTTCTACTGATGTTTTGGTAAAAGTATTGGAGCTTGAATTTCCGCAGATAT  | 3526 | A_95_P189437 TA14789_4097 |
| 3806 | 45 | 66 | 374  | ATGGTAATGGAAAAGAAGAGTGCCAGTGATACATTCTTTGATTGTGCGGTAGGATC    | 3534 | A_95_P090883 BP531131     |
| 3810 | 45 | 70 | 677  | GGCTACTTAAAGTGGAAAGTTGATTGAGCTTCTCTTAGTTTTGGGTATTTTTCAA     | 3542 | A_95_P206662 TA18566_4097 |
| 3812 | 45 | 72 | 693  | GCAATAGCAATAGCAATAGCACAGCAACAGAAACACCAAAAACCTTAGTAGTGTTC    | 3546 | A_95_P302828 FG638481     |
| 3816 | 45 | 76 | 473  | GGTTGAAGTGTGGCTTATGTTTTTCTGCGACATTGATTCTCTGGCGTTTGTGTAC     | 3554 | A_95_P094123 BP532576     |
| 3818 | 45 | 78 | 1263 | CACCCCCAAAACCTCCTCATAAAGGAAAAAGAAAGAAACAGTGAATTTAATATA      | 3558 | A_95_P203917 TA17956_4097 |
| 3820 | 45 | 80 | 488  | TGGTCAGATCAGAAGTTTTATCCATGTCAGCACGGATGAGGTTTATGGGGAGACTGA   | 3562 | A_95_P035093 BP128355     |
| 3821 | 45 | 81 | 1074 | CCTTTATGGATCAAATCTTGTCTTTTGGTTCTAAATGTGCTTACTGTGACCAGTTT    | 3564 | A_95_P113422 TA13535_4097 |
| 3824 | 45 | 84 | 748  | CCTGAAGGCTATTTGGTGTGTTGAATCTTGGTTCTTTCAAACATTTTTATGTCTACCTA | 3570 | A_95_P162612 EH621581     |
| 3825 | 45 | 85 | 446  | CATGCCTCTGTGGAAGGACTAGTCTTCTTTTTTCTTTTGATTGTTTTACTGTAAGAGA  | 3571 | A_95_P139727 EB443613     |
| 3832 | 46 | 7  | 338  | TTGTAGAATACATATTGTACTAACTGTAGTGTACCCACTTTTTTGGGCAAAAACCTATG | 3419 | A_95_P130642 EB430687     |
| 3838 | 46 | 13 | 0    | CAAAATCACTAGCTGTGTTTACCCTGAAAACCTTCAAGTGCCCGTGACCGCACATACA  | 3431 | A_95_P296703 A_95_P296703 |
| 3846 | 46 | 21 | 389  | CTGTGCGAACAGGCAACACATTCTGGGTTCACTATTGTGGGTTGATTATGCTCGTTT   | 3447 | A_95_P135882 EB439426     |
| 3849 | 46 | 24 | 775  | GATTTTCGCGTTACATATGCCTTCTCTTCCGACAAGAGTGAATTTGCTTCCCTTCTGA  | 3453 | A_95_P226389 EB683342     |
| 3853 | 46 | 28 | 356  | AGCGCCTAAGCGGGCAAGAATTGTATGTAAGGTTTACTTTTTGCCTATTATCTGGAA   | 3461 | A_95_P104282 CV016923     |
| 3854 | 46 | 29 | 836  | TGCACTGACTACATTATATCACTAGATGCAGATGAAATGTCAAAGGGAGGTGGAAC    | 3463 | A_95_P127742 TA17459_4097 |
| 3858 | 46 | 33 | 891  | CCTTTTATGGTTGAACGTGTATGCTTACTAAGTTGTCTGCCTGTGAAACAAAATGTA   | 3470 | A_95_P199402 EB426061     |
| 3865 | 46 | 40 | 427  | AATGGATCAATCACGCAAAAAGTTGAAAATCACAAACAGCCAACGTGGCAAGAAATC   | 3484 | A_95_P075850 BP526833     |
| 3867 | 46 | 42 | 874  | TTCATATGGCTGATGGTCAAAGCAAGAGCTTCTTTTATCCTTTTAGCGGGTCACTGA   | 3488 | A_95_P289128 DV157784     |
| 3871 | 46 | 46 | 800  | ACAAGAACTACGACTTTGGTAGATGCCACGAGTTTTATTGCAGTGGACAGCCTTGT    | 3496 | A_95_P189872 DV160053     |
| 3872 | 46 | 47 | 768  | CTGCTGGTGAATCTTTTAGTTTTCTTGAAGATGCTATTTTACAGTGTGGATGGATTA   | 3498 | A_95_P029541 EB424800     |
| 3874 | 46 | 49 | 589  | AGTTGGTAACCACTATATACATTTTCATCTGGGGTATAATGTCAAATGAGGAAAGGT   | 3502 | A_95_P017491 EB430176     |
| 3875 | 46 | 50 | 1229 | TAAATTGAAGGCGGTAATTCTGGGCCAGCAAATAGCAGAGATTGAGGATTCCGGTA    | 3504 | A_95_P239389 AY220480     |
| 3881 | 46 | 56 | 809  | GTTGAAGCTACATAACAATTTCCAGTCATCGAAAAGCATCACATTGTTAAATAAGGA   | 3515 | A_95_P178452 TA12256_4097 |
| 3887 | 46 | 62 | 741  | TTGAAGAGAAGTTTGGGATTGTTTTAAGAAGAAACTGCCTCTGGTGGCTATACCTA    | 3527 | A_95_P128392 EB428093     |
| 3892 | 46 | 67 | 621  | TAAGTAGAGGACTTTTGGGGGATAGCTTAGTTGAGTTTATCTATATTAGGACTTCTTT  | 3537 | A_95_P108177 DV158042     |
| 3902 | 46 | 77 | 699  | AGATATGCTGCAATTATGCACTCGCATAACTCACATTCGAACCGCATAATTGCCCTGC  | 3557 | A_95_P260236 FG640213     |
| 3905 | 46 | 80 | 1558 | GCTTTACCTTGATGTGTGTGATATCTGGCTATTGTTTTGAAGTCTTGCACATATTTGAT | 3563 | A_95_P197042 TA16476_4097 |
| 3906 | 46 | 81 | 222  | GTAGGAGATGGAATGCATGCCAATACACTCAAGTCTATTTGTTTTTCAGTAATTGAA   | 3565 | A_95_P006476 TA19814_4097 |
| 3907 | 46 | 82 | 377  | GCTTTGTAATTCTAATCTTAGAAGCTCGTGATTTGACTACCACTCTTGGAAAATG     | 3567 | A_95_P099803 BP535071     |
| 3910 | 46 | 85 | 549  | CGCCTAGCGTTGCTTGTCTGTAAACAGTAGCTTTAGTACATGAATTAGCGTTATTT    | 3572 | A_95_P001631 EH623842     |



|      |    |    |      |                                                              |      |                           |
|------|----|----|------|--------------------------------------------------------------|------|---------------------------|
| 3912 | 47 | 2  | 1096 | GTGTGTTGCACACTATGTAATAGTCTCTTGCTTATTAAGAACCTTGCATGTAAAAATC   | 3575 | A_95_P198197 TA16726_4097 |
| 3914 | 47 | 4  | 831  | TATATGTCTTCACATCTTAGTCCTTCTGGAGGAGAGGCGGGGTAACAATTTGGTCC     | 3579 | A_95_P026856 TA18162_4097 |
| 3917 | 47 | 7  | 855  | TTGGATTCTCCTTATTGTCATGCTTCTCCTTGTGCATCGTTTGTGCTGAGGTGTCTCTC  | 3585 | A_95_P244727 EB428396     |
| 3919 | 47 | 9  | 842  | CTTCTTTAAAGATGTTAGCAGTGATTGCAATAGCATTCAAGGTGCCAATTTCTTCTCA/  | 3589 | A_95_P005066 DV157707     |
| 3920 | 47 | 10 | 688  | TGCTGACTGTTGGTTTTGGATGTAGAGTTTGATCTCTTCTTGATATGAGTATGTGAAT   | 3591 | A_95_P018991 TA14550_4097 |
| 3923 | 47 | 13 | 331  | TAGTGATCCTTTGGGAACCTTCTGAAAGTCCATCATGTACAGAATCTAGAGTTATAT    | 3597 | A_95_P090523 BP530987     |
| 3927 | 47 | 17 | 159  | TGGTCAGTCTGTTACCTTGTTAAATGGAACACATATATCTCTTAGTTGAAGAATAGTT   | 3605 | A_95_P134187 EB436165     |
| 3929 | 47 | 19 | 92   | ATGCAATGAGCTCCATGAGAAGCAGGGAATGAAAGAATGCCTTCTGTAGGAGCC       | 3609 | A_95_P034199 AJ718275     |
| 3930 | 47 | 20 | 489  | GTACGCTCACATTTGTTTTGATTCCATTGACGGTGATGTAAAGTCGAGAATAACTAA    | 3611 | A_95_P209162 FG636399     |
| 3931 | 47 | 21 | 875  | ATCCCTGCACTTTTCATGGGCATTGCCATTGCAAGTTTCTTTTCGGTACACCCTCA/    | 3613 | A_95_P243132 DW000541     |
| 3935 | 47 | 25 | 831  | CTTGTTTAGAAAAAATTGCTAAATGAGAAGCTGCTTATGAATGCAGAGAGGATAGG/    | 3621 | A_95_P205097 DV157876     |
| 3937 | 47 | 27 | 416  | TGTGGTATTCGTAGAATGGCATGTATAATTTGGTACTGTATATTAGACGATAAGCAC    | 3625 | A_95_P221212 TA21773_4097 |
| 3938 | 47 | 28 | 540  | CAATAGCTTCTCACCGTTTTCTGCTATGTTGTACTAAAACATTCCGATTATATTGCATT  | 3627 | A_95_P024236 TA17414_4097 |
| 3942 | 47 | 32 | 304  | TTAATGCTCTCTACCTTGTTTCAGTATTCTACTATTGATACAAATATCTGGACATGGC   | 3635 | A_95_P196417 TA16334_4097 |
| 3944 | 47 | 34 | 611  | TTGCGTTTCGTCGTGAACTTTTGTCATTGACCTATTGGTTGATTATATAATGGAATC    | 3639 | A_95_P001951 TA14124_4097 |
| 3946 | 47 | 36 | 675  | TCAATGTCCTGTTTGTGGAATAGCGAAAAAAGCAGCATTGAGGGTTTGATTGACCAT    | 3643 | A_95_P215117 BP131006     |
| 3947 | 47 | 37 | 783  | TGGTTACTGCCAGCCTCACTTTTAGCATTATCTGTACTGTGGATGACGAGAGTTA      | 3645 | A_95_P125677 EB424755     |
| 3953 | 47 | 43 | 556  | CAAGTGGAAGTGTCTCTGCGAGGATTCTTTTTGAGGGGTAATAAAATAACTATCAA     | 3657 | A_95_P133747 EB435398     |
| 3954 | 47 | 44 | 525  | GTTTTTGTGCTGCAGTTATCTGCAATGAGAATGGAGAGTTATGAGTTTACTTACTGTAT  | 3659 | A_95_P039981 BP129699     |
| 3957 | 47 | 47 | 766  | CTGTTCAATTGTTGGGGTTTTGTTGAACCATGTCTACGGAGACTGTAACTTTTTATTTAT | 3665 | A_95_P000026 EB439159     |
| 3958 | 47 | 48 | 485  | TTGAAGAAAAGAGGCAACGGAGAGGTCATTCCCTCCTTTGACAATTTGAAGGAGC      | 3667 | A_95_P062710 BP135584     |
| 3961 | 47 | 51 | 748  | GCCAATGTACACTTTAACCCCTGGAAAGACATACAGTTTCAGGTTTTGCAACGTTGGC   | 3673 | A_95_P013121 EB426854     |
| 3962 | 47 | 52 | 630  | ACAAAATGGCTTCGAGTCAACTCAGCTTTATGCTGTTTCAATGGTTAGTTTTACAAT    | 3675 | A_95_P284293 FG190566     |
| 3963 | 47 | 53 | 897  | CTCTGCTCGTATATTACTTGTAAAGTAGTGTTAAAGTTTCCAATGTTTGTGGTGTCA/   | 3677 | A_95_P244642 EB424839     |
| 3965 | 47 | 55 | 172  | CTAATTGAAGGATATATGTGGAATTTATAACTGAACGCGCAATGCGTCTTGGATTTCT   | 3681 | A_95_P144397 EB447769     |
| 3966 | 47 | 56 | 567  | TGTGGGACGGCATGAAAAGGGTGCTGCATTTTTATTTATTTTTGCATATGGTGTATC    | 3683 | A_95_P024521 BP535201     |
| 3970 | 47 | 60 | 769  | GAAGGTACAGATGATTCCTAGTTAGTAGGCTTCTTTATTCTTTGTAGACTCTTTAG/    | 3691 | A_95_P014591 EB451434     |
| 3972 | 47 | 62 | 776  | TTTTGGGAAGACAAAGGAAATGGTTTGTACTCTGAGGCCACCTGCTGAACTGGTGAC    | 3695 | A_95_P236939 EB450672     |
| 3974 | 47 | 64 | 260  | GAAAGAGTTAACTACCTGTATTCTGTCCAAAAATGAAGAAATGATGAAGTCATTCTC/   | 3699 | A_95_P130982 EB431109     |
| 3975 | 47 | 65 | 699  | AACACAGCAACACCCCAAGTTCGAAAAGGATTTTGTGCTTGTATCGATTCTGTTGACCA/ | 3701 | A_95_P304378 FG173393     |
| 3977 | 47 | 67 | 1262 | AGCTAAGCCCATGCTATCTTTGGTAGAAGAGAAGCTTTGGACAAGTTATTGTTATTTT   | 3705 | A_95_P012656 TA12420_4097 |
| 3979 | 47 | 69 | 975  | CGTACTGTGGATGATCTTTTGTGACCTTTGAACTTATAATGGATTAATGTTGGCTTTA   | 3709 | A_95_P198452 TA16780_4097 |
| 3985 | 47 | 75 | 639  | TCATTGGGATCTTTGATAAATTACAAATGTGGATCAGTTGAGACTAATGTTTGAGTCT   | 3720 | A_95_P181822 TA13069_4097 |
| 3987 | 47 | 77 | 252  | GTAGGTCTCAATTTACTGTTGCAGCACATTTCTGTATCTTTGACAAGAAAGATGAT     | 3724 | A_95_P079765 BP527843     |

|      |    |    |      |                                                             |      |                           |
|------|----|----|------|-------------------------------------------------------------|------|---------------------------|
| 3988 | 47 | 78 | 716  | AAGGCGGCTGCTTTTATTAAGGAAAGCAAAGGCCTTTTGATGGTGTTCGGAAAAAGC   | 3726 | A_95_P163697 EH622802     |
| 3998 | 48 | 3  | 254  | TCGTTTGAAATTTTATGGAATCAGCTTCAGTGTTAGATTTAAACTTTGCCATCTCGCT  | 3578 | A_95_P133832 EB435523     |
| 3999 | 48 | 4  | 416  | GTGCTGTATGATGCCACACTTCCAATGTATACTTTGGTAAAAAGTTTGTGGTTATT    | 3580 | A_95_P212222 TA19787_4097 |
| 4000 | 48 | 5  | 1273 | CTAGGTAAATTGTGATAGACACTATTAAACTTGGTGTGCATTAGTCCCTTTTGTCTTC  | 3582 | A_95_P185452 TA13915_4097 |
| 4001 | 48 | 6  | 188  | GACGTAGGCTCGGCCACTCTTTATTGTGGAAGTAAATTAAGAGTATGTCCTCATGCI   | 3584 | A_95_P134482 EB436850     |
| 4004 | 48 | 9  | 235  | CAGCTATCTTATGGCTTGTGGGTTCTAACACTTGATAATGCACATTGAAATAAAGTTT  | 3590 | A_95_P134387 EB436630     |
| 4013 | 48 | 18 | 240  | CCTTTATGGATCTCCTCGTCCGATAGACAGGTCTATGTAGTTGGCTGGTATTTGCAAT  | 3608 | A_95_P109047 CV019124     |
| 4017 | 48 | 22 | 1091 | AGGGGAATTGTATGTTATGCCGATGCTTCTGCTTCTGCAGAGAAATCTAATTGCTTCT  | 3616 | A_95_P010911 TA14600_4097 |
| 4021 | 48 | 26 | 971  | CCATTTGTTGCCACTCAGGTTCTTTCTTATCTAGGACCAGTAATTTATCAAATGTACA  | 3624 | A_95_P015751 TA13441_4097 |
| 4023 | 48 | 28 | 1076 | TGTCAATGGTATGAATTGCGAATGGACCACTGTTTTCTTAGTGAATTTGATTTGCTT   | 3628 | A_95_P016966 TA17738_4097 |
| 4024 | 48 | 29 | 454  | CCTCAGGTGCTTGTCTTTCTATAATTGTTGAATTAACATGTCTTTCCACATTGATTGCA | 3630 | A_95_P006436 DW004769     |
| 4026 | 48 | 31 | 718  | TGACGACGTTAACAGTATACGTAGTGAATCTGAATCACTACTTGATCTGTTGTTAA    | 3634 | A_95_P013591 EH618959     |
| 4030 | 48 | 35 | 145  | AACCGTTTTGGTTGAAAGCTAGTTCCTTTCCATCTGCATTTGCTCTTGTTATAAAAA   | 3642 | A_95_P100088 BP535209     |
| 4031 | 48 | 36 | 543  | GAGCAAGTCTTAGTGCTCATTCTGTTGACCTATTTTATGTAAGCAGTTTAAAATGC    | 3644 | A_95_P125242 DW005039     |
| 4032 | 48 | 37 | 554  | GCGGACAAAGATTGGTTGTATCACCATTATGAGTTCAGTATCTCCTTATATTATCCAA  | 3646 | A_95_P245537 TA13261_4097 |
| 4033 | 48 | 38 | 1174 | GTTGGTTGATGCAAAAGTATTCTTATGGTACTCTCTCCACATAGCAATAGATTTGTG   | 3648 | A_95_P186302 TA14095_4097 |
| 4034 | 48 | 39 | 1352 | TTGGTCAATCCCTCTGTGCTTACGGGATTCTTTCATCTGGAGAGGACTATATGTTGA   | 3650 | A_95_P220372 TA21593_4097 |
| 4035 | 48 | 40 | 717  | TACTGTGGGATCAAAGTTTTGCCGTTGCGTTGAATTAATACATTGAATGAGTACTT    | 3652 | A_95_P013321 TA13046_4097 |
| 4038 | 48 | 43 | 731  | TTCAACATATGTTGGGGGGGCTAATATCACCACAGTCTTCTGGCTGTGCTCTTGTGGA  | 3658 | A_95_P192827 DW000248     |
| 4039 | 48 | 44 | 110  | ATTTAAGCATCTAGGTGTCCCTCTGGACAGAATTTTACTATGGTGAATGGCAATCCT   | 3660 | A_95_P132897 EB433713     |
| 4046 | 48 | 51 | 724  | GTAGCAGTCGGGAGTTTGGAGGAGAATTTCATTAGCATTACTACTATAATTGTTTGA   | 3674 | A_95_P207167 TA18681_4097 |
| 4048 | 48 | 53 | 393  | AACCAACAGTCTTCAAGGAGCCATTTTGTCTTCACTCTGAGAATTTCGGGTGTGAATC  | 3678 | A_95_P032411 NP916877     |
| 4051 | 48 | 56 | 1709 | GATACCGATAGGGGGTCTTTATAATTATCAGAAGCTTTTCTTCTGAAACACTTGAATC  | 3684 | A_95_P022886 TA16036_4097 |
| 4053 | 48 | 58 | 735  | CTAGACAATAAGTGTGGATATGAAAGAATTCGCCGCAATGCTTTACCATCTTAAAA    | 3688 | A_95_P215007 TA20389_4097 |
| 4054 | 48 | 59 | 708  | AGTAGGCCATGGCTTTGATCCATGCTCAAGCATGAAATGGCATCAACATGCTTGATC   | 3690 | A_95_P315583 FG180841     |
| 4061 | 48 | 66 | 1003 | GGTTGTATGAATTTGGTTTAGATACTTGTGTAACCTGTACAGCAGCGAAGAGAAAAAT  | 3704 | A_95_P202712 TA17693_4097 |
| 4062 | 48 | 67 | 676  | ACAAAAATTTCAGTACGCTACCCTGTGCATACGTGAAAAATCCAGGAATGTCTCTTTT  | 3706 | A_95_P157562 EH615609     |
| 4067 | 48 | 72 | 518  | AGTCTAGGGGATGTATGTTTCTTTTCCCTTTTTCAGAAAACAGAATATTATGACCTCTC | 3715 | A_95_P088688 BP530178     |
| 4068 | 48 | 73 | 332  | GGACATTTTCTTGATTAATACATCACTTAGACCAAAGATTGGCTTCGGTGGTATTAC   | 3717 | A_95_P216622 TA20746_4097 |
| 4070 | 48 | 75 | 306  | TATGGGAGATTATCCTGAACGTATTCTCTATAGCTAGAATGCTTGACTTTCTTGAGAG  | 3721 | A_95_P176272 U26255       |
| 4071 | 48 | 76 | 532  | TTGGGTTGTGTTACTGTTGCACCCCGCAATATTACGTCAATATTACATCCTGCAGTAT  | 3723 | A_95_P149367 EB679206     |
| 4077 | 48 | 82 | 722  | GCTCATGTAAATTATGAACTCTGGTATTTGATTTGCTTAGAATGTGGTAGTTGCTTTT  | 3735 | A_95_P124002 TA13071_4097 |
| 4083 | 49 | 3  | 541  | GGAAGTCAACCACTCCTGTTGTGAAGAAAGTCATAAGACTTGATGTTCTGTAGAG     | 3745 | A_95_P079705 FG148784     |
| 4084 | 49 | 4  | 93   | GTGCTGGTTTAGGAAAGGGATTGTTTGTACTCATTTCTGTTTAGCAAGAGTACAGA    | 3747 | A_95_P032981 AF211726     |

|      |    |    |      |                                                             |      |                           |
|------|----|----|------|-------------------------------------------------------------|------|---------------------------|
| 4085 | 49 | 5  | 750  | GGTGGTGTTTAATGAAAAATTCAGCTACGGATTTCCCTTTGTTGGTAGTATTTTACAC  | 3749 | A_95_P000656 EB683570     |
| 4087 | 49 | 7  | 866  | GTCGCCATGAGGATTCTAGTTGAGAATATTAGTAATGCAAAAGTTTTGTTGTTGGG    | 3753 | A_95_P179057 TA12418_4097 |
| 4089 | 49 | 9  | 439  | GATGTTGGAGATAGCCTTCAGGCCTGATAACTATCAATGAATGTTAGTTGAATGTTA   | 3757 | A_95_P299473 FG641450     |
| 4097 | 49 | 17 | 789  | GGAGCTGGTAGTGGAAAGTGGTGCTGGACCAAAGATTGAAGAAGTGGATTAATAGTT   | 3773 | A_95_P231164 EB429028     |
| 4102 | 49 | 22 | 423  | TGTCATATCTTCATATTGGTGTGCGGGTGTGAGGGATGAAGCTGTCTTTTCTGTGAAGC | 3783 | A_95_P067030 BP136752     |
| 4104 | 49 | 24 | 697  | TGATTGTTTCATAACTGAGGCCGGAACCTGAAGCTGCAGGCCAAAAATCTCCTTT     | 3787 | A_95_P137317 EB441048     |
| 4106 | 49 | 26 | 629  | AGATATCCATATGGAGGAATAATTCTGAGGCCTGGATTTATCTATGGGACCGTCGTG   | 3791 | A_95_P061650 BP135314     |
| 4115 | 49 | 35 | 815  | CTTTCCCGGCAGCATGGCATATACTGTCCTTTATGATATGTTTAGATTCTTTTTGTTCT | 3809 | A_95_P233129 EB678181     |
| 4122 | 49 | 42 | 215  | CTACTGATTTATGTACCTCAGGCAAGAATCAATCTTATTTGTAGAATGCACCGT      | 3823 | A_95_P141447 EB445171     |
| 4127 | 49 | 47 | 865  | TGTAGGTGGTTATACTCTTTGAATTATGCCCTGATTTGACGGGGGAACTAAAGGTG    | 3833 | A_95_P227399 EB426308     |
| 4128 | 49 | 48 | 515  | TTGGAAAAGTTGATAAGTCCATCAGGAAAATCTGGCAGATGGTTCTGCCTGCATCTT   | 3835 | A_95_P279383 AM784351     |
| 4129 | 49 | 49 | 596  | AGTTGGGGTTAGCTGTATGAATCATACTTTAATTTCTTTTATGTTGGGCGATAATAAC  | 3837 | A_95_P001201 EB446750     |
| 4133 | 49 | 53 | 398  | AATTCTTTGATTCAATCAAAGCCACACCAGCAGTGTGCTGCATTAATGTTTGTGTGA   | 3845 | A_95_P193062 TA15590_4097 |
| 4135 | 49 | 55 | 133  | TGGGCTTATTCAATTGAGCAAACATTTTTCTTGGTTGAGTTTGGAGGTGGAGGGGTG   | 3849 | A_95_P040401 BP129821     |
| 4136 | 49 | 56 | 444  | TCCCCTCTCCAGCCTGCTATCAGATTTTGTAACTTTCTGTTGAATTCAAGATTACA    | 3851 | A_95_P003061 TA12899_4097 |
| 4145 | 49 | 65 | 340  | GCGTTTAAGTCATGGTGGAAACCTTCTTCACTTTCAATGTTTCAGCTACTAGAGATC   | 3869 | A_95_P070340 BP192601     |
| 4146 | 49 | 66 | 831  | GAAATTGCTGCAAAAGCAGGATCTGACCTTGGATTTAGATGGTTAAAAAGACTTGAC   | 3871 | A_95_P018901 EB428306     |
| 4147 | 49 | 67 | 251  | CAACGGGAAGTTGAGGCCCGTTTTGCTTTGTAAAAAATCTCCCAAGTTATTTATA     | 3873 | A_95_P100003 BP535166     |
| 4148 | 49 | 68 | 196  | TATTAGATTGTGCCATTGCCAAGTTTTGCTGGCTAATTTGACCAGTTTGTCTATCTA   | 3875 | A_95_P105717 CV017582     |
| 4149 | 49 | 69 | 829  | CATCTTTATTATCCAAAACATCCACTTGACTGTGCTCATGCTGAGCTTGGATAGACGT  | 3877 | A_95_P310423 FG142191     |
| 4154 | 49 | 74 | 783  | AAGAAAGTCTACTCAGGAACCCCTATCAGCAGTACTAGACTTCTGCGCTCGAAGTC    | 3886 | A_95_P220982 TA21724_4097 |
| 4159 | 49 | 79 | 870  | CTTGCTCAACCGGCTGGCATGAATTTAGTTCAATATGTTATCGAGAATCAAACAGCTC  | 3896 | A_95_P245677 EB438409     |
| 4160 | 49 | 80 | 356  | ACAGTGAAAATGGGTAACACAAGTTACTCAAAGATTGCGGGGATTGGTGACATTTG    | 3898 | A_95_P155937 EG650332     |
| 4164 | 49 | 84 | 657  | CAACTCAATTAGTCTGTTTTGTGCGCATTCAATCAATATAGGAAGAACGATCAGATTT  | 3906 | A_95_P291233 FG187663     |
| 4170 | 50 | 5  | 678  | TCACCAGCTCTTCAATAAGTTTGCAGTTTGGCGTTGTTTTAAAAATAGTTGATGATAT  | 3750 | A_95_P204162 EB427763     |
| 4183 | 50 | 18 | 451  | GTGTATGAAAGCTGTCACGTTGGGTTACCAGTACAAGGGAAACATTATCCCTGTATG   | 3776 | A_95_P023916 BP135073     |
| 4184 | 50 | 19 | 800  | AGAGGAAAAATCTGCTTCTGCCCTCATGTATCATCATCTGCTATTGAAGCTGATGGC   | 3778 | A_95_P191332 DW000704     |
| 4188 | 50 | 23 | 663  | TAAAAGTTATGGATTCAAACGCAGATTAGTAGTGCTACCCGCCCTGCTTCTCTGT     | 3786 | A_95_P124332 DW004189     |
| 4193 | 50 | 28 | 1002 | TGCAATGCTGTTGTACCTACTATCATGTGCTTCAAATAAAATGCTCTGTGATAATACA  | 3796 | A_95_P008626 TA14741_4097 |
| 4201 | 50 | 36 | 438  | ATACTGAAAATACCTTATTATGCCTATGTTGTACATGGAGCTCTGTTTCTGTGGTTAC  | 3812 | A_95_P043416 BP130610     |
| 4206 | 50 | 41 | 1030 | TTCTTGTATAGAGTTGGTATATGGCGGCTCTCCCTTTCTCCTTTGCATCTTTGTTTTC  | 3822 | A_95_P134072 TA14095_4097 |
| 4207 | 50 | 42 | 0    | GAGAGTGCATGAGCTGATCCACATTTGTAAAGGGCTACACCAGAAAGTGTGCTGTCAG  | 3824 | A_95_P251662 A_95_P251662 |
| 4209 | 50 | 44 | 505  | CATGTTTTTGCCATGGGTTTCTTTCTGAATTGTGGTGGTTGTGCTTTGTTTTAGATAA  | 3828 | A_95_P004331 TA12804_4097 |
| 4212 | 50 | 47 | 1836 | TTATGTTATTAGAGTATGCGGTTCTGGACCTTGTGATATAGTTAGCTTGTGCTTCTTC  | 3834 | A_95_P032771 AF116915     |

|      |    |    |      |                                                             |      |                           |
|------|----|----|------|-------------------------------------------------------------|------|---------------------------|
| 4219 | 50 | 54 | 998  | CAGCAGTGGACGTTTTGGATAAGTAAAAACAGTAGACATTAGCAGATAAATTAGCAC   | 3848 | A_95_P027371 TA11967_4097 |
| 4221 | 50 | 56 | 779  | AAGAGCTGAGTGAAGGAGAAGCAAGAGTATTAATGGCATATGGTTGGGTACCTAAC    | 3852 | A_95_P149467 EB679315     |
| 4223 | 50 | 58 | 742  | TGAACCTCTTTGTCGGACAACTTCTGCACTGGTTTATGATGATGATTTCCGTGTTTT   | 3856 | A_95_P292153 EB426676     |
| 4226 | 50 | 61 | 710  | AGATTCTTCTTTGTGAAATGAGGCCTTGTCCCTCTCTGAGCTTTATCTTGATCGTCAT  | 3862 | A_95_P316283 FG199960     |
| 4230 | 50 | 65 | 882  | GGAGAGAACAAATTCCTCCTTTTTAAGCCGAAACGGAATTGGCTTATATACTTAAGT/  | 3870 | A_95_P011346 TA17203_4097 |
| 4231 | 50 | 66 | 367  | GTGTGGCTAAGATGTCGCTTAATAACTGGAAAGTCACTTTCCTTTAGTCATAGTAGC   | 3872 | A_95_P037971 BP129145     |
| 4233 | 50 | 68 | 990  | AATGATGAAAAGTTTCCTGTTCGTGAAACATCAGCGAGAGCATTAGGATTGCTTCTA/  | 3876 | A_95_P206012 TA18414_4097 |
| 4237 | 50 | 72 | 789  | TTGTCAGAGAGATGGAGTTATCATGAATGATGAGACTGTGCATCAGTTGTGTAGCAC   | 3883 | A_95_P229214 FG158067     |
| 4238 | 50 | 73 | 783  | CAGCTTGTTGAATGTTGTAATTCGAGCACTAAATAAATCTCCTATGGGGATATTGAAC  | 3885 | A_95_P116182 EB446238     |
| 4239 | 50 | 74 | 1674 | CAAGGTGGCCCAGAAGTTTTGTTTGTATGTTGCTTAAGATACTTAATTCGGAACCTA   | 3887 | A_95_P002321 U04632       |
| 4240 | 50 | 75 | 193  | CTTCCAAAAGGGTTAATGCCTTCTCCTCAGACACCAGCAAAGATTATGCACAAAGC    | 3889 | A_95_P211082 TA19534_4097 |
| 4245 | 50 | 80 | 820  | CGAATCTCACTTGCCTCTCGTTGAATAATCTCCGAATGTTACATTTATAAGTCAAGTTT | 3899 | A_95_P020091 TA15046_4097 |
| 4246 | 50 | 81 | 313  | TTCTACATGAATCCAAAAGAGAAGAGGCGATTTTGCACCGTCTTTAAAAATGCCAAA   | 3901 | A_95_P087723 BP529866     |
| 4258 | 51 | 8  | 358  | TATTTATGCGCACTTGTTGTGGTCTGTTGTGGTCACTGAGATGCTTGTCTAATTTAA   | 3924 | A_95_P213247 FS403828     |
| 4263 | 51 | 13 | 709  | CAGCAAAAATCCTCCTAGGAATTGGTGGGGGACATTACGTACCACGGCATATGGA1    | 3934 | A_95_P295693 EB448394     |
| 4264 | 51 | 14 | 397  | CCGCTGTTGGTGGATCTAAAGACTAGTACCTTAATCTGAATATTGGTTCTATACCTT1  | 3936 | A_95_P153862 DW003761     |
| 4268 | 51 | 18 | 914  | GGGAATGCATTGCAATATAGTTGGCTCATAAGCTTTTGATAGTAGTGTTCATCTTTT   | 3944 | A_95_P009236 TA13141_4097 |
| 4277 | 51 | 27 | 864  | CTTGTTAAGGAGCCAGTCCGAGTGGATAGTGCTGGGTTTTTGTGATTCTATTCT      | 3960 | A_95_P218527 TA21195_4097 |
| 4284 | 51 | 34 | 232  | ACTCATTTGGGGATTAACCTTTGTATAAATGAGACTCTCTATAGTTTGCTACCTTA    | 3973 | A_95_P102287 CV015956     |
| 4285 | 51 | 35 | 580  | ATTTGAATCGCTCAAAAAGCGGAAAGATACGGGGAGCTTCACTGTTCAAGATTTTGA   | 3975 | A_95_P287163 FG641271     |
| 4286 | 51 | 36 | 604  | GCTGAGACTGAATTGGGCTTGCCTCAATGACTTCTTCTCTCATATTATGTAACAG/    | 3977 | A_95_P267441 DV160207     |
| 4292 | 51 | 42 | 597  | ACCCTCAATGAGTCTGGCTTCATTCGTCTCATTTAGCAATGTGAGAGTCTGGCTTTAA/ | 3989 | A_95_P038906 BP129401     |
| 4293 | 51 | 43 | 252  | ATTGCTGCTGTATTTGTTGCTGTTTGCACCGAATTGCTAACTGGTATTTTTCAACCAT  | 3991 | A_95_P096138 BP533490     |
| 4294 | 51 | 44 | 231  | GCCTTATTTGCTTCTCCATAGGTCCAAATTGTTGTAATAAATACTACCACGTTTACAGA | 3993 | A_95_P164202 EH623346     |
| 4299 | 51 | 49 | 375  | ATTTGTCTCAGGAGGATTTCTTGGAAGTCAAGCTCGGAGAAAAAAGTCATCTTCGTC/  | 4003 | A_95_P220667 EH664450     |
| 4303 | 51 | 53 | 654  | TGACATAGCAGATTGTAACATGAGTATTAATGCTAGAGAAGAATGATGGGGCTTGG/   | 4011 | A_95_P121627 DW001741     |
| 4307 | 51 | 57 | 474  | ATTTGGAGGGGCAAGTAGACATGCCTTTGTAGGTTTAAGGACTTTTTCTTAATATTT   | 4019 | A_95_P174682 EH665907     |
| 4311 | 51 | 61 | 682  | GCATTTTTGTCAAAGTTTGAGTGTTCTCAAATGCCGCATCCTCTGTTAGAGAATATCA/ | 4026 | A_95_P059141 BP134661     |
| 4312 | 51 | 62 | 450  | AAAGCTCTCAAATTCAGAAATTTGAGCTTTTGTGGAGCATGGCAAGTGATGGTTT1    | 4028 | A_95_P139917 EB443828     |
| 4317 | 51 | 67 | 118  | TCTAATGTTCAATTTAGGCTAAATAGAAGCCACAATGCATAAAATGCACTAACCCATT  | 4038 | A_95_P241890 AJ718724     |
| 4318 | 51 | 68 | 1377 | GGCCATGAAATGTACAAGAACATATGCCCTTGATTTGCAATAAATTGTGGAATTTGT/  | 4040 | A_95_P210177 TA19343_4097 |
| 4319 | 51 | 69 | 817  | ATCGAGAGGATTTACTGTTCTTGATTAATTTTTGTTATTCTTGTGCTGTCCCTTCCAG` | 4042 | A_95_P009681 EB439113     |
| 4326 | 51 | 76 | 524  | GAAAAATGTATCAGTAAATATAGGGCCATTCAAAGTTGTTACTAGATGAGCAGGC     | 4056 | A_95_P103407 CV016487     |
| 4327 | 51 | 77 | 252  | ACCATACATTTAGAGGTATCGCTTTCAATTGAGAAATAGCAATGAGACTGTTCTGTG   | 4058 | A_95_P103967 CV016776     |



|      |    |    |      |                                                             |      |                           |
|------|----|----|------|-------------------------------------------------------------|------|---------------------------|
| 4418 | 52 | 83 | 560  | GGCCCTCTATAGATACCAAATGGGATTTCTGGTGTGTTTGAAGTCTCTTGCATGGATAT | 4071 | A_95_P264826 TC66144      |
| 4422 | 53 | 2  | 300  | CCCAGGTTTTGTATCTTTAATCATTTCTATGTGGTGAACGATCTATCATCTTAGAGCAA | 4078 | A_95_P141397 EB445132     |
| 4425 | 53 | 5  | 784  | CAAACAGAGGAAGTCATCTTTGACCATTTGCATTCAACTGCATTCCAGTACTCACCTT  | 4084 | A_95_P016786 EB444467     |
| 4426 | 53 | 6  | 538  | GTGTGCATATGCTTATCGTCAGCTTCCCTTGTGTTATTTTACATTTATAAGACGAATTT | 4086 | A_95_P014951 BP128466     |
| 4429 | 53 | 9  | 747  | TTAGCCTGATCGGTTACTGTATGTGCTATGTGATTTGTCCGCGATCTCGTTGTTTTTGC | 4092 | A_95_P286033 FG176065     |
| 4430 | 53 | 10 | 894  | TCTGTTGATTTAGTAATTGTGCTTGTGATGAAGTATTATTGTGTAGGTTAGTCTGCC   | 4094 | A_95_P251562 EB679203     |
| 4436 | 53 | 16 | 412  | CAAACCCCTAATGTAGTGATACCCCTTCCCTTTTATGAAATTCATAAAGTCATACTAT  | 4106 | A_95_P073185 BP526154     |
| 4442 | 53 | 22 | 342  | GGCCAGTTGTTATTTACAGTTTTAGTACTGAAACCGTTGGAATGGGATAATGTTTTT   | 4117 | A_95_P008541 TA14036_4097 |
| 4443 | 53 | 23 | 704  | CTTGGAGATTATACTGTGTAATGCTTACTCTCAAACCTTCGTTTACACAGTAATGATT  | 4119 | A_95_P124902 DW004697     |
| 4444 | 53 | 24 | 618  | GTGCAATCTCTTTCAACAACGGAAGTGCTTAAAGGTGTTCCATGATTATCTGTCAAAGA | 4121 | A_95_P085075 FG639353     |
| 4447 | 53 | 27 | 1193 | GCAGATGTTAATCTATTGGTCTTTTTGGTTTTGACGTTAATCCAGAGTTGTGTTAAATC | 4127 | A_95_P236339 AF098635     |
| 4449 | 53 | 29 | 756  | TGAAGTTCTGTTGCCCTCAGCTGTTGGTTGTGTTTCTGTGAATGAACTTTTTAGCCTT  | 4131 | A_95_P019311 EB678616     |
| 4451 | 53 | 31 | 764  | ACCTGTGCTCAAGTCATACGCTTCATTGGTGAGATTTTTGTTTCAGCGAAAGGATGTCA | 4135 | A_95_P162782 EH621767     |
| 4452 | 53 | 32 | 1124 | GCTGCTTTGTTCAACTTTCCATGTTGATTGCATTTGCTTGCACCTATGCCTAAACTTTT | 4137 | A_95_P198637 TA16822_4097 |
| 4453 | 53 | 33 | 352  | GTTGCTAGTTGCAATGATGAAGTTTTAGCTCCAAAATCAACCTGAATATATTGTTCTG  | 4139 | A_95_P209917 TA19290_4097 |
| 4460 | 53 | 40 | 732  | GGGACATAGTCATTATAATGTGAAAATTATGCATTGTCTGCCGATTTGTCAATTCAGC  | 4153 | A_95_P163187 EH622159     |
| 4463 | 53 | 43 | 320  | GTTTTGGGTGCAGGTACCCTTCCCTTCGGTACTCTTTTCATCGAGTTCTTCTTCATCAT | 4159 | A_95_P094710 BP532841     |
| 4466 | 53 | 46 | 365  | CCCTTTAACAACCTCTCTTCATGGCAATTTGCCCTGCTAAAGTAAATGTTTGCACATC  | 4165 | A_95_P078505 BP527532     |
| 4467 | 53 | 47 | 519  | ATGGTCACCAGATTTTGTAGTGTGATTGCAGATTGCCTTTTCGATGGCTAGGAGTAACT | 4167 | A_95_P115872 DV158291     |
| 4472 | 53 | 52 | 596  | CCCACCCCAACAACCAATTTAACTTTTATACAGGTATAGTATCTGTTAATAAAGTAA   | 4176 | A_95_P200652 EB444504     |
| 4473 | 53 | 53 | 727  | AATTGAACACTGGCTTTAACTGTGGTTGTAACCTTCAGTCTCTTCTAATATTCTTCTTC | 4178 | A_95_P020041 TA21816_4097 |
| 4474 | 53 | 54 | 478  | AGGTTGATGATGTCATTCTCCCTTACATATTCAAGGAATAGTAATAGCTAGGTCCCCA  | 4180 | A_95_P105207 CV017355     |
| 4477 | 53 | 57 | 608  | GACGCTGATATATTTACCTTTCTTCAAATAACGAAGTTCGACAGGAAGTAAATTGTG   | 4186 | A_95_P146392 TA18636_4097 |
| 4482 | 53 | 62 | 1376 | GTAATGCAAAAGTTTTGTTGTTGTGGTTCAAAGGCATGATCACTACGTGAGAGTTGA   | 4195 | A_95_P016956 TA12419_4097 |
| 4487 | 53 | 67 | 830  | AATCAAAGACACACCACAAGACTGTGAGGTGAAGTCTACGAGTCAGCTAGCAGCAA    | 4205 | A_95_P200317 EB438594     |
| 4498 | 53 | 78 | 689  | GTATTTTGTAGGGATCTTGGTGATGAGATTGAAAATGTCGGTTAATGACACTTCTGC   | 4227 | A_95_P241709 FG636765     |
| 4501 | 53 | 81 | 488  | GCATAGAAGCCATGAAGGTTCTACAACATATAAAGACTTTGCCAAAGGTGGAGGGA    | 4232 | A_95_P084250 BP528970     |
| 4505 | 53 | 85 | 54   | GCCTTGAATATGCTTTACACGACTTGTAGATCAATTGTGCGTTTGTATAGTTACATT   | 4240 | A_95_P131842 EB432260     |
| 4508 | 54 | 3  | 636  | ACAACCTCAGTAAAATTTACCTGGTGGGATTTGGGGAGGGTAGAGTGTGCAGATCTG   | 4081 | A_95_P223677 BP129613     |
| 4512 | 54 | 7  | 1217 | TTAAGATTCTTGAGACATACTGGTTGGAGGAAGATGACGAGACAATGCCACCTGGTC   | 4089 | A_95_P203867 TA17945_4097 |
| 4513 | 54 | 8  | 476  | CTCTTTCTATTTCAAGGTATGACACTAACAGAATAGGGAGTCTCGACCAGCGAGCA    | 4091 | A_95_P059705 BP134806     |
| 4514 | 54 | 9  | 293  | CTGTTTTCTCATCTCAAAAAGTGAACCGTTAATTAGGTGCCAAACATCCTTGCAGA    | 4093 | A_95_P107632 FS416927     |
| 4515 | 54 | 10 | 531  | ATTACTTGTGTGGTTGTATGACAGCCTGGTGATGCCTTTTCTGTAATCATTATCCTAA  | 4095 | A_95_P122127 DW002161     |
| 4516 | 54 | 11 | 572  | GCTTATTGAACTGGCTTCGACTTATGCTTTATGAAAACATGAATATTGAGTGATGATT  | 4097 | A_95_P275143 FG641096     |

|      |    |    |      |                                                              |      |                           |
|------|----|----|------|--------------------------------------------------------------|------|---------------------------|
| 4519 | 54 | 14 | 1089 | TATATCTAACCTTCACGAGATGCGGTTGGAAAACACAAGCAAAGCGGTCAAATCTGC    | 4103 | A_95_P196512 TA16355_4097 |
| 4527 | 54 | 22 | 857  | TAGCACGGACGATGGGTTTAGAGACTAATTAAGAGATTCTGATACCATTAATGCAC     | 4118 | A_95_P012071 EB447706     |
| 4534 | 54 | 29 | 112  | CTTGGCTGGCTTCTATTGTTCTCTGTTTCTCATATATCATGAATGTACCAAGTTCTAAT/ | 4132 | A_95_P212317 TA19807_4097 |
| 4542 | 54 | 37 | 549  | ATAGGAACTGCACCACTGAATTCTCCTTTTATGTTATGGAAAAGATACCACTACTCAT/  | 4148 | A_95_P307373 FG638314     |
| 4543 | 54 | 38 | 705  | GAGTACTTTGCTTCTTTAGTGCTAGTGCTTCTCTAGATAATATACTGGAGCAATAAAT/  | 4150 | A_95_P291048 EB449388     |
| 4546 | 54 | 41 | 811  | GTCTCTTGCAATTTGTAGCATACTATTCATGTATAGTAGAGATCAAATGGTAGGATGG/  | 4156 | A_95_P254529 FG163907     |
| 4549 | 54 | 44 | 248  | CTGTCCTTATAGCTGAAATTAATGTTTTATTCTGTCTGGCATCTGTGTGTTCTTGAT    | 4162 | A_95_P160647 EH619317     |
| 4550 | 54 | 45 | 247  | TTTTGTGATCGCATTTCGCAGGTGAAGGCGAACCTTGCCTTTTGTGCCAAAATAAATT   | 4164 | A_95_P145612 EB449372     |
| 4553 | 54 | 48 | 889  | AATATACTTTAGGAGGTACAATATATGGCTGCATTCAAACGGGACATGCACAGCAA     | 4170 | A_95_P011426 EB424698     |
| 4554 | 54 | 49 | 295  | GGGGTCCTAGTAGAGTCAGTTCAACCTGGGGATTTGTTTTATTGTTAGTTTTATTGA    | 4172 | A_95_P141407 EB445138     |
| 4555 | 54 | 50 | 874  | CTAAAGCCTACGATGGCTGACTTTACTCTCCAGTTAAATTATTCTGTCTAGTCAATGGC/ | 4174 | A_95_P228174 EU880279     |
| 4558 | 54 | 53 | 486  | ACAAAAAGGTTGAATCTGGATGCTGTTGGTGTGAGCTTGACAAGATGCAAGCCGTC     | 4179 | A_95_P207697 FG159329     |
| 4561 | 54 | 56 | 1080 | TTATCTTGTGGATGTAGAATTCAGCGTGGCAAGAGTCGTCTCTTGTATTTTCTTTTTT   | 4185 | A_95_P018011 TA17173_4097 |
| 4573 | 54 | 68 | 235  | TATTAAGTATAGGGTGACCTTTGTATCTTTGTTGGACAACAAACTTCCCTCTGTTAAC   | 4208 | A_95_P100868 BQ842877     |
| 4574 | 54 | 69 | 1578 | GCCCATGTATCTTGATTAATTGTTACAAGCTCGTGTATTCTTGAACGTTTGTCTAAGT   | 4210 | A_95_P181327 TA12952_4097 |
| 4576 | 54 | 71 | 746  | AAGGCCTTAGGTGATAGGTCTCCTTGTATTCCTTATCAAAAAATAGGTCTTTGTATC    | 4214 | A_95_P260881 EB681914     |
| 4578 | 54 | 73 | 0    | TTTCTGATCCACATCACTCTGCATCAGAGCAGCTAGTGTAGACTGAAAGCATGCAAC/   | 4218 | A_95_P267256 A_95_P267256 |
| 4580 | 54 | 75 | 1326 | GGTCTGATGAGTGACCTGATTATTTACACTTACATGTGGCTTTATAAATCATGATGA    | 4222 | A_95_P007531 AJ271748     |
| 4584 | 54 | 79 | 254  | CATTTAGCAGTGATAGCAGTCCAATAAACATAAGCTCTGCTTGCAGGCCAAAAAGG     | 4229 | A_95_P062115 BP135430     |
| 4585 | 54 | 80 | 564  | CAAAGCCTTGATGAGCTCATTAACACAGTAAGGCGCAGTTAGAGTTGATCAGCAAA     | 4231 | A_95_P056896 BP134073     |
| 4588 | 54 | 83 | 643  | ACTGTTGGACGCTGTAGCTATTCTATAAACTCGTTGTTTTAGAGTTTTGTTCAATCAAC  | 4237 | A_95_P125037 FG144478     |
| 4589 | 54 | 84 | 750  | GTCATCTATTCTGAGTTCCAACATTTTCATGATTTGTTATTCTGAGAGTAGTGC       | 4239 | A_95_P003736 EB438934     |
| 4591 | 55 | 1  | 504  | TAGTAGCTCTAGACCAATTGTTTATAGTCCTAGTTCAAATCGTCAGTCGATGAGATA    | 4242 | A_95_P053476 BP133188     |
| 4592 | 55 | 2  | 90   | GTGAAGGATTTCTCGCATTTTAAAAATAGGAGCGGAGAAAATGTACGGAGAGAAAAG    | 4244 | A_95_P241185 AJ718186     |
| 4593 | 55 | 3  | 756  | GGATAGCAGCATCCCCACTGCACAAAAATAACTTAATTCTATGTAAAATGTAAAAC     | 4246 | A_95_P240905 EB681754     |
| 4596 | 55 | 6  | 353  | ATTTAACCGCTGTTGGTGGATCTAAAGACTCAGTACCTTTAATCTGAATATTGGTTCC/  | 4252 | A_95_P037826 BP129104     |
| 4598 | 55 | 8  | 658  | CTCTGGAGGGTCTTCTGTTAAGGAAAAGGAATCATCAAAGAGAACAAGGAAGAAGAA    | 4256 | A_95_P114947 EB677239     |
| 4599 | 55 | 9  | 358  | TATGATGATGCTGTACAAGGTATATCGGTCACCAAACGTCTAACAGCTACGGAAGAG    | 4258 | A_95_P048961 BP132047     |
| 4607 | 55 | 17 | 147  | CAACAAACTCGGTGGTCTTTTGAGGCAGAGCATTTCTAGGAAATGCAGTCAAGTGCA    | 4273 | A_95_P112482 DV158042     |
| 4609 | 55 | 19 | 812  | CTGTATCCGAACATTCCGAATCATTGTGAAGTATAGAATGAAATCTCTATGAAAAGG/   | 4277 | A_95_P268466 DV159080     |
| 4613 | 55 | 23 | 434  | TAAAATTCCCGTCGTAAGGGCTAATGTGTGACCCTATTGAAGTGATACGAAATTACT/   | 4285 | A_95_P099148 BP534811     |
| 4618 | 55 | 28 | 44   | CACAAAGCTTTGGCACTGATTGAGTTGTGCATACACCAGTGTGTATAATATCATTAT    | 4295 | A_95_P132687 EB433279     |
| 4621 | 55 | 31 | 255  | AGGGGTGTTTTATATGTACTTCTGTACAACCTTTCACGTTTTGTGTTTCAAGATCTTTG  | 4300 | A_95_P110957 CV019980     |
| 4626 | 55 | 36 | 499  | CCAGGAAGAGTATCCTGAAATAGTTGCAGAACAGCTTTACAGGTTTCTGCAAGAGAA    | 4310 | A_95_P034464 TA17755_4097 |

|      |    |    |      |                                                              |      |                           |
|------|----|----|------|--------------------------------------------------------------|------|---------------------------|
| 4628 | 55 | 38 | 707  | TAAAATGGAAAGGTAATCTCTTGGAGTTCTTCCCTTCAGCAAAGCGGACACCTGAAG    | 4314 | A_95_P216417 FG145536     |
| 4633 | 55 | 43 | 699  | TGAGCATCTAGGTCACCTAAGATTGTATGGACATGGGGTTACCAAGACTTCCTTAAA/   | 4323 | A_95_P271831 EB445661     |
| 4639 | 55 | 49 | 212  | CACAGGCAAAAGCTACTTAGTTTTCTAAGAATTTTGATTGGATTTGTACACGAAGG/    | 4335 | A_95_P132977 EB433894     |
| 4640 | 55 | 50 | 522  | TTTGATATTGCTAGTGCAAAATTGCTACTCTGACTAGTAGTTTTCTTGAGATTGAGT(   | 4337 | A_95_P123207 DW003077     |
| 4643 | 55 | 53 | 873  | AAGCGAATGGTATTGGATTTCAAATACAAGTGAGACTGACAGTGGGAGGCAATAT      | 4342 | A_95_P273141 EB681892     |
| 4658 | 55 | 68 | 527  | CTAGTGCCACTGATTACTTAATTGCTTCTGGTGGTAGTCCATATTGCAATGGGGAATA   | 4372 | A_95_P040521 BP129852     |
| 4659 | 55 | 69 | 925  | ATGATTTTGTGATGCTGTAATGGCGTGCCTATGCAATGTCCTGTCCATGCATG        | 4374 | A_95_P247182 EB438044     |
| 4660 | 55 | 70 | 673  | TTTTTTGTATTCATCATCCACTGATCTGAGCCCTCAAAGATTCGACCCTCCTATCTGAT( | 4376 | A_95_P299883 FG640616     |
| 4662 | 55 | 72 | 830  | TGCAATATGTGCTTTGGCCTGAATGTGGTTGGCAGTCTGTGTCCTTGACAGATTTGAT   | 4380 | A_95_P215172 DV159554     |
| 4664 | 55 | 74 | 749  | TCAAATTATCTCCTGAGGTGAAAATTCCTTTGTTTATCAATTGGTTTGCTTTGTCTG(   | 4384 | A_95_P013146 DV160860     |
| 4666 | 55 | 76 | 819  | TTGTTATGAATGCTATGACACAAGCGATGAACATGGCCGAAGAACAGACTAGCGGA(    | 4388 | A_95_P260801 EB438781     |
| 4668 | 55 | 78 | 467  | CCATATACTAAGGTCTATGCTCTCCATCTGCTCCCTATTGACTGAACCAAATCCAGATC  | 4391 | A_95_P106137 CV017770     |
| 4682 | 56 | 7  | 894  | TAAACTATAAAGACATGCCTCATTGTGCTGCACTTTTCCATAGCTATGCGTTAATCTTA  | 4255 | A_95_P008096 EB677862     |
| 4689 | 56 | 14 | 90   | ATTCTCAGTGGTGATCATTGCGATCTTTGGTTGAAACAGCTAAAAGAACGGCTTTAA1   | 4268 | A_95_P152277 EB682620     |
| 4690 | 56 | 15 | 0    | CTAAACTTTTGGTAATGGTATAATTATCGCTTGATGTCAAAAACTGGAAGAATTC(     | 4270 | A_95_P025376 A_95_P025376 |
| 4692 | 56 | 17 | 454  | CTAGTTGCTTTATTGTCTTTTGAACATTTGTGCACTCTGAATCTTGTACTAAGTTCG(   | 4274 | A_95_P024626 TA14413_4097 |
| 4694 | 56 | 19 | 862  | GTCTTATCGATGCTGTTGCTGCTTCCACTAACATTACCATATCCAATTGCCACTTCACT( | 4278 | A_95_P013181 EB428794     |
| 4696 | 56 | 21 | 697  | GTCGCCTTTTGTGTTACTACTGAATCTTGATAGTTAATGCAACGAGAACAAGATAATT   | 4282 | A_95_P132812 EB433568     |
| 4708 | 56 | 33 | 93   | CCGTTTCAATTTACGAGAAAATATTTCTTTTGTAGTCGGGGCTAAAAAGAATGAGCCA   | 4305 | A_95_P115267 DR109313     |
| 4715 | 56 | 40 | 0    | CGGTAATGTCTGTGTTTCATCTTTCTTCTTCTTCTTGGGTTTGGCTATTCTTCGAGC    | 4318 | A_95_P235174 A_95_P235174 |
| 4718 | 56 | 43 | 863  | AATGAATTGTTGGGGTTTACTTGAATCAAATTCGAGATCATAACAGCTCCAAT        | 4324 | A_95_P187177 EB448119     |
| 4721 | 56 | 46 | 769  | GAATGTTCTGTTCTGGTTTAAAAATGCAAGTAACTTTCTGTACGAAGGGAATTGGTTT(  | 4330 | A_95_P012381 TA12284_4097 |
| 4723 | 56 | 48 | 0    | ATTGATCTGAGCTATGCTGTAGCTTCAGTTGGACTTTGGGAGAGACTTTCTGGGATC(   | 4334 | A_95_P312453 A_95_P312453 |
| 4725 | 56 | 50 | 818  | ATTACCCTGTGCCCGCCGATCAGCTGATTTATTCTGTTTATCCAATACTTTTGTTTTTC  | 4338 | A_95_P000346 Z56282       |
| 4733 | 56 | 58 | 805  | AACAGATTAAGGATCTGAAGTGCCCGCGTGATTCTACTTCTGGTTATGAGTTTAGAG(   | 4353 | A_95_P272626 EB451564     |
| 4744 | 56 | 69 | 1120 | CATGGCCTTCAAAGGTTTATTTTGGAACTGTTCCGGCATATCTAATCCTTGTATGAATI  | 4375 | A_95_P195337 TA16094_4097 |
| 4745 | 56 | 70 | 823  | ATAATAGGGCTTGGTGAGGCTGAAGAGGATAGAATTGGTTTGTGCATACCCTGGC/     | 4377 | A_95_P009206 DW000005     |
| 4746 | 56 | 71 | 1370 | GCTTTGTGCCACTTGTACGAATGGTTGAATTATGAATATGATTTATCTTCTTGAAGCT   | 4379 | A_95_P002281 TA14949_4097 |
| 4751 | 56 | 76 | 903  | ACCTCAGCACTAACGATTCTGTTTCTGCTTATAGTTGTACATTTTTACATATCCCATT(  | 4389 | A_95_P288238 EB424835     |
| 4755 | 56 | 80 | 848  | AAGTATCTGCAGAGATCTAGATGCTGATCTGATGAAGTATCATTCAAAGCATGCAGA    | 4396 | A_95_P285973 FG138693     |
| 4761 | 57 | 1  | 289  | GAAAAGATGGGAAGAGAAGATTCTGTGATGCTAAAGAGTATGCTATCAAAGAGC       | 4407 | A_95_P146957 EB451143     |
| 4766 | 57 | 6  | 677  | GGTATCATCCCAAATTAGTTGGGGAAGACGATATGCGTCAATCTGATGATTTGAGTG    | 4417 | A_95_P219622 TA21434_4097 |
| 4772 | 57 | 12 | 233  | ATGAATGAGGGATGTTAGGGGAATTTTGGGTTTGGTTTCTAAATTTCCCTGGGAATT    | 4428 | A_95_P031251 BP532474     |
| 4773 | 57 | 13 | 317  | GGGAAATAAGGAAAATGCTTGGTTTATTTACCTGAATAGGTTTCCATATTGGCTTTCT   | 4430 | A_95_P156377 TA18129_4097 |



|      |    |    |      |                                                             |      |                           |
|------|----|----|------|-------------------------------------------------------------|------|---------------------------|
| 4775 | 57 | 15 | 708  | CTATAAGGCGTCTTCTCTTGTGAGGTTCACTGTTAGAAAAGTCATTTGAGCTG       | 4434 | A_95_P078240 EB680119     |
| 4787 | 57 | 27 | 131  | TAGTGGTCGCGTGCCAAGTGTGTATTGTTGAGTTACCTTATTGCACTATCACAAACGA  | 4457 | A_95_P112842 CV020875     |
| 4789 | 57 | 29 | 1094 | TCCTTAGTGAGCAGCACATTCTTTAATTTGTCTGTGTTAGACATGTTCAAGTGTGACCI | 4461 | A_95_P091368 TA16297_4097 |
| 4790 | 57 | 30 | 1165 | GATCCAAGAAGCTCTTTTGCCTAGCCTTATGAGTAATTTTATGTTTCCTTCTGTGTTTT | 4463 | A_95_P007856 D17526       |
| 4803 | 57 | 43 | 253  | GAGGTTTTCTTGTCTCTGTAGTATGTTTTCTAAATTTTCGATTTGACATAGTGAAGTGC | 4488 | A_95_P130232 EB430269     |
| 4807 | 57 | 47 | 851  | TTCCTGTAATCAATTTAATTCCATTGAGGACGCAAATGGCACTATTGCTTGTGCAT    | 4496 | A_95_P011876 TA12111_4097 |
| 4812 | 57 | 52 | 428  | TGGGATAGCTTATCTTTGGATATTTCACTTGGCTTCATGTTTTGATCTCCTTTTCTGT  | 4504 | A_95_P181082 TA12894_4097 |
| 4816 | 57 | 56 | 489  | ACCGCAATAAGGAAACCTAATTTAGCTCGTTGTACTTTGTATTGCATTGGATGTTTAT  | 4511 | A_95_P146997 EB451231     |
| 4818 | 57 | 58 | 175  | TTATGTGTTACCAATGGGTTTCGTTTCATGCTTCCGCACTTTTCAACCAGGCAACAT   | 4515 | A_95_P102737 CV016169     |
| 4824 | 57 | 64 | 652  | TCAAGGAGATAGATAGCTGAGGTCTGATCAACCAATATAGTCTGGGAAACGTCTAC    | 4527 | A_95_P287178 FG642291     |
| 4826 | 57 | 66 | 438  | GCTTGCAAGGCTGCAGCATTTCTACATTTTGTGTTTGTCCATTTCTATTATGATGTCCT | 4531 | A_95_P039296 BP129511     |
| 4835 | 57 | 75 | 101  | ATACTAAAGAAGAAGAAGAGAGAAGGAGCTCTGATGGGATCTTTGCTGAACTAACT    | 4548 | A_95_P077845 FG136330     |
| 4843 | 57 | 83 | 555  | CAAGTGGAGAAACAAGTTCAGTTGGATTCTACAACCTCTACTGTAGATGAACAAGGC   | 4564 | A_95_P125152 DW004953     |
| 4850 | 58 | 5  | 716  | GATTTGTCAGGAGCTGTGCGCCGTCCTTCTGAGCTAATTTCTGGAAAATTTGATGGAC  | 4416 | A_95_P128692 DV161230     |
| 4855 | 58 | 10 | 694  | AAATTTACCATTCTCTCTCTTATAGCGGCGAGTATAAGCTTCTACCTTGCCGACT     | 4425 | A_95_P259066 EB440322     |
| 4859 | 58 | 14 | 794  | ACGAAAGGATAACTGGAAGGGCTGAATATTAAGTTCGAGCATAAGAGTAATGCTTTTA  | 4433 | A_95_P245942 DW005092     |
| 4875 | 58 | 30 | 666  | TTTTCTATGCATCTTGAGTTTTGAGTAAATGTAATATTCCAGCGAACGACTTCCCCTC  | 4464 | A_95_P193282 TA15637_4097 |
| 4878 | 58 | 33 | 550  | AATTAGTTCAGTGAAGCAAATTTGGTTTTACATCTTGAATGAAAAGAGCACGATTGC   | 4470 | A_95_P021611 DW002468     |
| 4882 | 58 | 37 | 568  | CGGAAAAGAGACGTTTTATTTATGAACATGACAAATGGTGAATAAGACAGTAATTGAC  | 4477 | A_95_P302308 FG641357     |
| 4888 | 58 | 43 | 551  | AATTTTGAAGGTCACTTTTAAGTATGCGCCGTGATCAGGTGCATTGATGGAATCTC    | 4489 | A_95_P145172 EB448736     |
| 4889 | 58 | 44 | 1006 | TTGCTCTTTGGATGGATAATGGACAGTATTGCACCATCTTTTATGGCTTTTGTCTCCG  | 4491 | A_95_P184372 TA13681_4097 |
| 4896 | 58 | 51 | 534  | GCTTGACAGAACTCCAGAAAAATGAGAGATTAGGTTTCAAAAATTTCTATGCTGGAT   | 4503 | A_95_P280973 FG635775     |
| 4899 | 58 | 54 | 818  | CGTTAGTTGAAATGTATTTCCAACCTTTGGCTCATGGGTGTTATGTGAAGGAATGATA  | 4508 | A_95_P107782 DV999956     |
| 4902 | 58 | 57 | 899  | ATTTTGCAGAGGGAAATGCACTACCTACAAGCTAACTCTTTTTGCATGATTTATTTCT  | 4514 | A_95_P224172 DV162682     |
| 4905 | 58 | 60 | 599  | GCACTTTGTAGGAAGGAACTTTTGTGTAGTAACTTGTGCATGGAAATTGTAATCTTT   | 4520 | A_95_P143412 FG175871     |
| 4907 | 58 | 62 | 240  | GTATTTTGTAGCGCCAGACTTTGGCATTGACTGTGGTGCATACTGGTCTTAAAAA     | 4524 | A_95_P127447 EB426991     |
| 4908 | 58 | 63 | 211  | GTGTTGCAGTATGACATTGAGTTGAATCTTAGTATGTTGTACACTTGAAATATAAAGC  | 4526 | A_95_P097043 BP533860     |
| 4909 | 58 | 64 | 0    | TGTGCGTAGCTTCTTACATATCTTGTGCTGCATGTGAGCTGTATGCTAACTGCAGTA   | 4528 | A_95_P269151 A_95_P269151 |
| 4911 | 58 | 66 | 271  | TACTGTAAAGAAGGGTACGCCAGATCTTAAGAAGACGGTTATGCCAGCGTGTCAATTG  | 4532 | A_95_P113056 CV020981     |
| 4919 | 58 | 74 | 524  | CAGTTTGTGCTGCCTGATTAACGTAGAAATTAATGACATGTAGCGGCTGCTATTAG    | 4547 | A_95_P000861 EH624123     |
| 4923 | 58 | 78 | 786  | AATAACACTACTCTATATCGCTGTTCAATGTCTATTGGTCTTTCTTGCTTGCATTTTCA | 4555 | A_95_P135562 EB439058     |
| 4929 | 58 | 84 | 693  | AGATACAAAAGAGTTTGATTGAGTTGCACCAAGTGTTCCTTGATATGGCTGTTATGG   | 4567 | A_95_P303668 FG192050     |
| 4932 | 59 | 2  | 852  | TTACTATGCAGATGTTGCAAGGTTCTCTCAAGGAATTCCTCTGAATGCAAGCGTTCC   | 4572 | A_95_P146262 EB450248     |
| 4933 | 59 | 3  | 678  | CTCCTGAAACAAGACTCAAGTACTCGCAGAGATAACAAAGTTTCGGTGGGCATCATC   | 4574 | A_95_P067455 TA18559_4097 |

|      |    |    |      |                                                             |      |                           |
|------|----|----|------|-------------------------------------------------------------|------|---------------------------|
| 4935 | 59 | 5  | 294  | CCCTTGCAATTGTTAAGATAACTCTCTTGATATCCACAATAATGTGTGTGTTTACTC   | 4578 | A_95_P102557 TA11636_4097 |
| 4937 | 59 | 7  | 829  | GACGTTCTGTTTATATCTTATGTATCAAGGAATATCCACAGTGGAATATAGGCTTTA   | 4582 | A_95_P130397 EB430442     |
| 4944 | 59 | 14 | 699  | TTTACCTTTTCTCATGTAAAAATGAAAAGTTGGTTAAAGCTGACTAGCTGAGATTGG   | 4596 | A_95_P014766 TA15482_4097 |
| 4950 | 59 | 20 | 1187 | GTATACTGTTTTGATTCCGATATTTCTGTTGGTGTGAGGTATCTTTGCTCTTCAGTT   | 4608 | A_95_P023361 TA15533_4097 |
| 4953 | 59 | 23 | 630  | TCTATCTGGAGCGTGTCTCAATCTTGGTCAGCATCTAAACAGCTCCAGTCAATTGCA.  | 4614 | A_95_P128632 DV160797     |
| 4954 | 59 | 24 | 231  | GTAGATGAGGACGTCCATTGTGGTTCAAGAATTTTGTACCTTGTTTTGTTGTAATA    | 4616 | A_95_P000981 EH624474     |
| 4956 | 59 | 26 | 402  | TCACCATTTGATCTGTGAAACTGAAGAAGCTGTTTTACGTCTTCTCTGCAATTAGTT   | 4620 | A_95_P005896 FG638066     |
| 4958 | 59 | 28 | 861  | TCGAGCATGTGTTTCATGTGTGACTGATAAATGATCTTGGGGCTATGCAAGTTATGTC/ | 4624 | A_95_P295243 FG143459     |
| 4959 | 59 | 29 | 935  | TTTGTCAAACTCCAGACTATGACTCCAATTCTGAGTTACTCATTCTTCTGCTCTA/    | 4626 | A_95_P009726 TA12569_4097 |
| 4962 | 59 | 32 | 771  | TCCAAGTGGAAGTTGATTGGATTAAAGCCTTGCAGTGCAGTAAGCAAAAGGGGAA     | 4632 | A_95_P296828 EB680052     |
| 4964 | 59 | 34 | 807  | CAGTTTTTGAGGGGGAAGTTACTACTGAAGAAGCAGAGAGTTTTATTAGCTCCGTT    | 4636 | A_95_P212182 EB444636     |
| 4977 | 59 | 47 | 727  | AAGGAGCTATGCTCGTGGTCCAAGATAGGAGCTTCTTATGTCCTATGAATTCCTAGA   | 4662 | A_95_P126407 TA17269_4097 |
| 4979 | 59 | 49 | 394  | TACTCCTCCCAAATCCTTCTGGATGTGCTCGCAGTGAGCCTTACAATTATTTTGGA/   | 4666 | A_95_P073220 BP526163     |
| 4980 | 59 | 50 | 259  | GTATATCTGCTAGCGTCCGCAGACCTCAAAATCCCCTTCTATCCTTATTATGTTGTTT  | 4668 | A_95_P093018 BP532102     |
| 4982 | 59 | 52 | 2083 | GTCGGTTTGGTACGGTTTTGAAAGACTTCGATTTGCTATTTTCGGTTTTAAAAGGTT   | 4672 | A_95_P213547 AJ244024     |
| 4984 | 59 | 54 | 838  | GCTGCATATACCTATTGGATTAGAGGTTTTGTGGCATGTAAAGCTTTTGTCTCAAGG   | 4676 | A_95_P241490 FG172752     |
| 4987 | 59 | 57 | 344  | TATGTGCTGATCACAATGTTAACCTGATCACAGTTCCTAGTGCCAAGACACTCGGCG   | 4682 | A_95_P107207 DV159293     |
| 4990 | 59 | 60 | 224  | CTTTTGTGCGTAAGGGCGTGGCCATCAATGAAATGAGCTCGTCTTCTTCTTGGTTAA   | 4688 | A_95_P204232 TA18022_4097 |
| 4994 | 59 | 64 | 829  | AGGTTGAGTACTGTATATGGTCTTGGTCAAATGAAATTTGAAGCTTTTGTATACTC    | 4696 | A_95_P204167 TA18008_4097 |
| 4995 | 59 | 65 | 804  | ACTCGAGCGAAAATGATTCCATGAGAAAAGAAAGTCTCTCACAAAGGACAAGAAGTT/  | 4698 | A_95_P291833 EB425003     |
| 5000 | 59 | 70 | 305  | CTGATGTATGCATGATCTCCAAGTTCTTTGAGAATTCTGAGTTGCAACGTCTTGGTTT  | 4707 | A_95_P144977 EB448528     |
| 5001 | 59 | 71 | 301  | GGGATTCACGGTGGGTCGCATGTGCCTTACATTAATTTAATCATATTTCTTCTCTGC/  | 4709 | A_95_P134152 EB436081     |
| 5004 | 59 | 74 | 851  | TCTATAATGATTCAGACTCGGAGCCTAAAGTCATCAGGAATGTCCCGAGAGTGTTC.   | 4715 | A_95_P228689 DV999980     |
| 5005 | 59 | 75 | 828  | GCTGGCCATTTTGGAGGAATCTGTAATAGAGAGGGCTTTGATATGGAATTGAATAT    | 4717 | A_95_P121687 DW001798     |
| 5006 | 59 | 76 | 417  | ATCCCTTTAAAAAGCTTGTAATGTCGCTGTAATTGGCAAATCTCTAATGCTATTTGC   | 4719 | A_95_P025076 TA17794_4097 |
| 5007 | 59 | 77 | 207  | CAAAGGAATGGAAAGAAAAGCTCGACAACAGTTCAAGGACTGAGGAAAACAATTCAE   | 4721 | A_95_P093283 TA12804_4097 |
| 5008 | 59 | 78 | 846  | CTGAAATACTTGCAATGACAAATCTTATAGCAGCATATCAACGAAATGAGATCTTGG/  | 4723 | A_95_P235219 DV162035     |
| 5009 | 59 | 79 | 378  | TTTCGCAACTGGTTCGCGGTCTTCGCTTCGAAATTGTTGCTGTTTTCTTGACAGAT    | 4725 | A_95_P158782 EH616659     |
| 5011 | 59 | 81 | 859  | ATCTTGAGCCTGTTGACATCGCACTTTTTCAATTTCCGGGTGTATCATGTATGACAAAT | 4729 | A_95_P236014 DV161341     |
| 5015 | 59 | 85 | 592  | TTTGATGCTATCATGTATGTGTGTGTTTTGGTAGTGGATTTGGCTATTTATATAGCGC  | 4737 | A_95_P000258 EB441762     |
| 5019 | 60 | 4  | 565  | CTTCGCGTAATTGGGATAGTTTTCTGATTGACAAAAGGAAGGAAAGCTAGAAATGTC   | 4577 | A_95_P220707 TA21664_4097 |
| 5020 | 60 | 5  | 290  | GCATTTCTTAATTGCTGCTGAAATAAATTCGCTTGTTAGATTTTACTCGCTGGTGATCA | 4579 | A_95_P028736 TA19500_4097 |
| 5021 | 60 | 6  | 596  | TGGAGCAAGTGAACCTTGTTCTTGATACTGTTGGGTCAAATAATTTATGCTGAAA     | 4581 | A_95_P178372 TA12231_4097 |
| 5026 | 60 | 11 | 353  | AACTACTTTTTGAGCCTCATGTTGTGGGACTGATTCTTGTGCGCGCTTTATCAAATTA/ | 4591 | A_95_P076675 BP527049     |

|      |    |    |      |                                                             |      |                           |
|------|----|----|------|-------------------------------------------------------------|------|---------------------------|
| 5027 | 60 | 12 | 454  | CTAGTAGAGTCAAATCCTTCGTTTGAGGTCCTTCTCCGTTTGTGTTTTCTTAGATT    | 4593 | A_95_P074875 BP526583     |
| 5029 | 60 | 14 | 352  | CTAACTTGCCACCTAAGTCTATGGGATCTAAAGGGTTTAGGGGTTTTACATTGTTAC   | 4597 | A_95_P107812 CV018541     |
| 5030 | 60 | 15 | 1092 | CTGGAATTAGGTGTAGCTATATCACAAGCTCATGTTTCTACGATCTTAATCTGTATTT/ | 4599 | A_95_P022591 TC60690      |
| 5034 | 60 | 19 | 821  | TCACCACAATGCGAGATCAAGGTGGAAGTATTTTGAAGTGGAGTACTACTACGTGG/   | 4607 | A_95_P188652 TA14618_4097 |
| 5036 | 60 | 21 | 112  | TGATTCAGATTGATGGAGTGAACCTAATGAGTGAAGTGGATTGGTCACCTCGGCAC    | 4611 | A_95_P102652 CV016125     |
| 5037 | 60 | 22 | 457  | TTGTGATCAGGTATTTTGGAGGAATTAACCTGGCACTGGCGGTCTAGTTAGAGCTT    | 4613 | A_95_P067385 FG196569     |
| 5047 | 60 | 32 | 449  | CCAAAATTACTATGAACAAAGCTCTGTGTTAGCGAACCTTCTTGGAGCATCCTCTT    | 4633 | A_95_P057666 BP134274     |
| 5049 | 60 | 34 | 740  | TGTGTCTCCTCCTTTGGCAAAGTGCCATTAATTGGCAACAGATTGCTATTGACTTTTC  | 4637 | A_95_P261566 FG641293     |
| 5053 | 60 | 38 | 530  | ATGCCATCCAATACCTGTTTCCAGTTGCTCATAGAACATGTGAAAAAGAGATTTAAAT  | 4645 | A_95_P021021 EB682892     |
| 5054 | 60 | 39 | 906  | GCGTAAGACCAATGGTGTAGACCTATGTTTTGGATTAACCTGTGTACAATCTGAAATI  | 4647 | A_95_P000806 TA13182_4097 |
| 5055 | 60 | 40 | 297  | CTGGCCTTTGGGGATGTCCAATTGTGATAGTTACCTTCTTTATTGTATACAGTTCAT   | 4649 | A_95_P003931 EB445315     |
| 5058 | 60 | 43 | 504  | TGTCGTGGTTTTGACTGTACTGTTTTCATTTAGTTGATGGGACCATTTACCATTTTATG | 4655 | A_95_P188067 FG639309     |
| 5063 | 60 | 48 | 155  | GCTTAAAGTTGTTTTGACTTCTGGCTCCTTGAAGTTATGGAATTTCTCTGAGTTGCTA  | 4665 | A_95_P163322 EH622333     |
| 5064 | 60 | 49 | 901  | AATTAGTGTCCCTCGCACTAATTGCATATCTGCAAGCCATTTAAAACTGACGTCAAG   | 4667 | A_95_P210882 TA19490_4097 |
| 5066 | 60 | 51 | 823  | GATTCAGGATGTTCTTGAAACAAGAAAAGCAGGCTGTAATCTTCGCAAAGTTATTGA   | 4671 | A_95_P186102 TA14054_4097 |
| 5068 | 60 | 53 | 522  | TCCATGCCTGTGTGGATCTTCCAATTGCAGGGGACGTCTTACTAAATTCTCTGATGC   | 4675 | A_95_P302453 FG636848     |
| 5071 | 60 | 56 | 1025 | AACATCAAGTTCCCGACGAAGCTTACTTCTGAGCAGAAAGCTGGCATTAAAGCGATAC  | 4681 | A_95_P220592 TA21641_4097 |
| 5075 | 60 | 60 | 216  | GAAGGTATTTGGCATCAGCTTCATTTGAGAGCTTTCATTCATCATATGGGATGTTGC   | 4689 | A_95_P138667 EH664831     |
| 5078 | 60 | 63 | 302  | TGCTGATGTAACAGCTGATACTGTGATCTTATAATATATGCAGTATGCACTGTCGTT   | 4695 | A_95_P121922 DW002001     |
| 5081 | 60 | 66 | 863  | TCATAAGAACTCAAACATGGCTGGCATGATTCTGAGATACTCCAACGTGATTGGTTCT  | 4700 | A_95_P294363 EB440991     |
| 5083 | 60 | 68 | 297  | TGTCTGTCCACTTGCAACCTACCTTGAATTCTGTGTACCATTATAAATTGAAAGAGA/  | 4704 | A_95_P159762 EH618208     |
| 5088 | 60 | 73 | 242  | TCTTAGAATGCTGGGATCGTGAGAGGAAAGAACATGGTGGCTATTAAAAATTGTTGCT  | 4714 | A_95_P172001 FG152454     |
| 5089 | 60 | 74 | 465  | GCTTAGAGATTTTCTACTAGAAAACTGAGGCTGGATGTTACCTTTGGCTATGTAA/    | 4716 | A_95_P005471 CV018427     |
| 5094 | 60 | 79 | 618  | TACGTTTACGAAGAGAGAAAATACAGTTTTTGATTTATTTAAAGAGTTGCTTGTGCCGT | 4726 | A_95_P136017 EB439579     |
| 5095 | 60 | 80 | 1030 | TAACTTAATGTTGGCCGCTTGGTGCAGCATCCTTAATAAAAATGCCTTCTCAGCTCG   | 4728 | A_95_P198122 TA16711_4097 |
| 5097 | 60 | 82 | 749  | TCCGTGCTCGTATATTGTCCTGTTTGTGAAGATTCTTAATTCGCGAGCTATTCATT    | 4732 | A_95_P220292 TA21577_4097 |
| 5111 | 61 | 11 | 353  | TTTCGAAATCACTGTTGCTGGTTGCCGAATATGCTGTTTTATTTCTTGATGACTTG    | 4758 | A_95_P093913 BP532471     |
| 5113 | 61 | 13 | 157  | AGGTAGATGTCATGTTTCGCAGACCTTGTCTCTCCTTCCCTATCCTCTGTTTATTTAT  | 4761 | A_95_P077710 BP527321     |
| 5118 | 61 | 18 | 504  | CCTGAGATTTTGAGTTGATCTGATACTTACTTTCAAGATTGAAGATTTTGGTTACTTG  | 4770 | A_95_P019221 TA11958_4097 |
| 5125 | 61 | 25 | 677  | CTGCTTTGAGGAAGCCATAAATTCTTTACCTTAGTCGGTGTGATATACAGGCATTT    | 4784 | A_95_P122997 DW002883     |
| 5126 | 61 | 26 | 625  | CTAGGGACCTGTATTCGAGCATTGCAAATCATTGTTAAGTTTGAAGTATAGAATGAAA  | 4786 | A_95_P153567 EB683815     |
| 5128 | 61 | 28 | 705  | TGATTATCAATGGAAAGAGCGGGAAAGGCGACGGTAAGGATGAGCCAATGTACACT    | 4790 | A_95_P227754 EB426854     |
| 5132 | 61 | 32 | 848  | AGGGGGAATCCGAAGATGAGGAGTGATTTATGTTTGGTTGGATTATTGTTTAGTTG    | 4798 | A_95_P293993 EB439039     |
| 5133 | 61 | 33 | 228  | GTCCTATGTTTCGGAAATGAACAGGACTGAGGGATCCTTCTTACTTCCAGTGATATT   | 4800 | A_95_P055936 BP133833     |

|      |    |    |      |                                                               |      |                           |
|------|----|----|------|---------------------------------------------------------------|------|---------------------------|
| 5136 | 61 | 36 | 401  | GTTTCGATGTGAATCCCTTGAATTATGAATGGTATAAAGTAGAAAGCCCTAAGGTTTT(   | 4806 | A_95_P006316 TA15490_4097 |
| 5137 | 61 | 37 | 639  | TGTGCCTGTAGCTTTGGATATTTTGGCTGATATACTTCAGAATTCGAAGTTTGAAGAG    | 4808 | A_95_P139017 EB442727     |
| 5139 | 61 | 39 | 560  | TGAAACTATTATCTCACTTGACAGCCGCCAACACGAGTGACTTATGGTCAGTTTGAAC    | 4812 | A_95_P143777 FG634181     |
| 5148 | 61 | 48 | 636  | GACTACTATTTGTGAATTTTTGCTCCCTTTCTTTGGCATGCTATCGTGTTGATTTCAA/   | 4829 | A_95_P219647 TA21439_4097 |
| 5150 | 61 | 50 | 685  | CCCTGGAAGTTTGCTTAATTTGCTCATATGCGCAGAATTAATACTGAATATAACCTTG    | 4833 | A_95_P120432 DW000345     |
| 5154 | 61 | 54 | 160  | CTCTTTCCAGGTACACCGAAATGGTTGATGATGTCATTAGGTCTCAAGCTGAGAGAT     | 4841 | A_95_P195597 TA16151_4097 |
| 5157 | 61 | 57 | 631  | TCGCTCGTATGCATTTGTAGTGTACCATTGTAATTTAGTTTGTACACAATGCATACTTA   | 4847 | A_95_P305538 FG636265     |
| 5159 | 61 | 59 | 493  | CAAACGTATCGAAAAGAAAGCATCATGTATAGCAGTGATTCTTATACAGTTCTTGTTT    | 4851 | A_95_P031101 EB431808     |
| 5164 | 61 | 64 | 885  | ATCTAAAGATCTGATCAAGCGCATGGCTTCTTTTCAACGCAAGTGATTACAATTC       | 4861 | A_95_P183507 EB429241     |
| 5166 | 61 | 66 | 2429 | GCCAAAGCTGTGTGATATGTTTTAGCATCCTATATGCAATGGCTAAGAATAAAGTG      | 4865 | A_95_P188932 TA14682_4097 |
| 5167 | 61 | 67 | 969  | CTGATATCCCCCTCCATCTCAACCTTGAAACATCTTTAATGTATGTGAATATATGTAC    | 4867 | A_95_P123017 TA15096_4097 |
| 5170 | 61 | 70 | 625  | AAGGTTGAACATGCCCTCTTGTAACAATTTGATTTGCTGTTTGTGCAAGAATCTA/      | 4873 | A_95_P258256 FG636798     |
| 5171 | 61 | 71 | 1215 | TTGGTATTTTCATGATTTCTGTCTCATATATTATGCAGCTGTTACTGGTCTGTTACTT    | 4875 | A_95_P183167 TA13397_4097 |
| 5182 | 61 | 82 | 744  | TTCTTGAGCACTTCTTGGGAAGAGCAATTTCCCAAGTTGTATGCAGAAAAGGAAAAGCG   | 4896 | A_95_P222677 EB443066     |
| 5186 | 62 | 1  | 490  | GAATGGATTGCTAGTGCAGTATATACCATGGTGGAGAAGGTACAATGATAAGTTAG      | 4740 | A_95_P046941 DW003630     |
| 5188 | 62 | 3  | 290  | TATCAAGCACCTTCACTATTTCCGATAGTATTTATGGTTCTACCTTTTTCTTAGCAAC    | 4744 | A_95_P147877 EB643481     |
| 5189 | 62 | 4  | 800  | AGAAGAGACAGTCCCAGCTAGTTTTAGAAAATGAAGACATGAGCACCTGGTACACC/     | 4746 | A_95_P125872 EB424994     |
| 5192 | 62 | 7  | 693  | GAGATGTCACCTTATGCTCATCTCACGATTTGTTCAACTTTGAATTTTGGGTAAATGAA/  | 4751 | A_95_P151147 EB681377     |
| 5196 | 62 | 11 | 857  | ATATTTCTTTGGTAGAAAAACTAGTTCGTGCGTCCGATTTTGCAGGGAATACTTAGA/    | 4759 | A_95_P248842 DW004634     |
| 5199 | 62 | 14 | 449  | GCTAGGGGTTGTCTATCAAGCTTGATTTTGGAGGTGAGTGCATTGAAGGATTGCAG      | 4764 | A_95_P054221 BP133380     |
| 5204 | 62 | 19 | 738  | AATGAGTTGCATCTGTGTGGAGATGCAGCAGCTGTTCTCTTGTTCAGGAAATCCTC/     | 4773 | A_95_P128892 EB428617     |
| 5205 | 62 | 20 | 638  | AACATTATAAATTAGTTGCCATATGGGATTGAGCTGACACATGTGGCTGGCTGCTAG     | 4775 | A_95_P221732 TA21882_4097 |
| 5208 | 62 | 23 | 661  | GGATGTTATGTAAAGCTAGCCCTTTCTAAATGTAGTAGTTGATTTTCTGGCAATCATA    | 4781 | A_95_P020866 DW003321     |
| 5220 | 62 | 35 | 1105 | CTAAATGTGCTTTGCTGTGACCAGGTTTGGTTTTAATAAGGATTCATGCCAGTTTGGT    | 4805 | A_95_P026241 TA13535_4097 |
| 5223 | 62 | 38 | 795  | TTGTGGCGTGGACTAGGTTACTTTGTGATTCAGACTTCAGCTTTCATGAGGCTCACTT    | 4811 | A_95_P018591 EB449715     |
| 5230 | 62 | 45 | 429  | TGCAAAGTGGAGGCTAATTTGTTATAAAAACGTCTTTGCAGATCCCTCCTCTAAACTT    | 4825 | A_95_P079405 BP527753     |
| 5233 | 62 | 48 | 707  | CGTTTTCTGTGACAATGAGCTTGCATGTGTATATTATGTAAGGCTGGTATATGTTTCT    | 4830 | A_95_P232529 EB430886     |
| 5235 | 62 | 50 | 0    | TTGACACTTTGATATCAACCCGAAGATCTGATTCGATGTGTTGCCATCGTGCTCACGC    | 4834 | A_95_P284853 A_95_P284853 |
| 5238 | 62 | 53 | 742  | TAAAACATTGACTGAAATGAGGAAAAGGAGTGGGGTTGGGGTTTTGAATTCATGC       | 4840 | A_95_P128452 EB428150     |
| 5241 | 62 | 56 | 157  | TTTTTCTTTATTGCCAACACAGTAACTTTATTGGTACTGAACATGGCATTACCTTTGGG   | 4846 | A_95_P034434 AJ718741     |
| 5248 | 62 | 63 | 976  | GGATCTACCAACTCGGAGGTTTATTTACTGTCATTCGTTATAGAGAATGATGTTAATT    | 4860 | A_95_P008611 TA14267_4097 |
| 5250 | 62 | 65 | 157  | AGTCCTTTAGGTAGTGTGAGTCTATCATGTCTTTTATTATCGTATTTCCCTTTGTAT     | 4864 | A_95_P097743 BP534179     |
| 5253 | 62 | 68 | 372  | GGTATTGTATGTCGTACCTACAGAAGTTGTGCTGAATTAATGAAGATAAAGCTTTAT/    | 4870 | A_95_P220312 TA21581_4097 |
| 5256 | 62 | 71 | 457  | CTGCTCTCGTCAAGTTCCTTTGTAACCTGTGCTTACACAATTAATAAATGTAGTACATTAC | 4876 | A_95_P105172 CV017334     |

|      |    |    |      |                                                              |      |                           |
|------|----|----|------|--------------------------------------------------------------|------|---------------------------|
| 5257 | 62 | 72 | 373  | AACTTGCTGAGATCAAGCATGCTCGTCTTGCTATAGGTTGACCTTCTGGGCTTTGAT    | 4878 | A_95_P107127 CV018219     |
| 5266 | 62 | 81 | 358  | AATGGAAATCTGCTCTCCAAATATCCGTCCATTTACGCTGTTAAATGCACCCCTGA/    | 4895 | A_95_P160357 Y10472       |
| 5268 | 62 | 83 | 232  | AACTCATAGTTGCCCTTGATAGAGGCTCCTTCTCTCTTTCAATTATTCTGTTTCTTGA   | 4899 | A_95_P099023 BP534733     |
| 5271 | 63 | 1  | 313  | TTGCAAAGGCTAAGGAGGCATTAGATAGGAAAAACGCAATGCAGAAAAGGCCCA/      | 4904 | A_95_P157822 EH615856     |
| 5272 | 63 | 2  | 771  | GAGAAGAGTATGAACATATTCTGCTTCAGATAATCAAACAATAACAATGGAGGAG/     | 4906 | A_95_P126957 EB426356     |
| 5274 | 63 | 4  | 763  | ATGGAATGGTGAACCTCAAAGAATTCCTTTTTGCTTTTACTCATTGGGTAGGGATCGA   | 4910 | A_95_P236489 FG194427     |
| 5275 | 63 | 5  | 753  | TTACTGTATGTAAGCATAACCCGTCGTGTATTGACGAAAGAATAGATGCAATCTATAI   | 4912 | A_95_P234994 DV158042     |
| 5280 | 63 | 10 | 837  | CAGTCTCCGGTGTGACCTCTTGAGCTGACTTGTAATTTATGCAAAGCTGCTCGTTTT(   | 4922 | A_95_P224647 EB447622     |
| 5282 | 63 | 12 | 315  | TCACTCTGACTGTAGACATGTGATTTTTGACCCCTCCAAGATTTTTATATTTAGI      | 4926 | A_95_P089958 BP530737     |
| 5283 | 63 | 13 | 760  | CAAAGCTTGACTGTGACTTCCTCATTACTTTGCCGTCTTCTCATTGGGCCTCTTT      | 4928 | A_95_P116192 DV158776     |
| 5284 | 63 | 14 | 739  | TCAGAATTGCATTAGAATCCGTCTTCAATGCTATCCACCCTGCTGCGCTGAAGTATAC   | 4930 | A_95_P267786 DV161891     |
| 5292 | 63 | 22 | 522  | CCAGCTTTTTATTTGGTGGAGGTCAAGAAGTCCAATGGAGATGCATTGGAATATCAG    | 4946 | A_95_P043516 BP130636     |
| 5297 | 63 | 27 | 788  | CAGATGGGCATTTGATCATTGAAGCTATTAGTACATCTTATTGTTTGTAGTGTAGTGA   | 4956 | A_95_P126507 EB425820     |
| 5300 | 63 | 30 | 555  | ATACTGTTTACCCATTTCTCTATGTTTCGAGAGTACTATCCTCTGAGGAGACCATATTG/ | 4962 | A_95_P042601 BP130400     |
| 5301 | 63 | 31 | 722  | GGGCTGCCATTTATGTGACTTTGTATGTGATGTTTGTATTATATGTATATTGTGACAG`  | 4964 | A_95_P017061 TA13746_4097 |
| 5303 | 63 | 33 | 2531 | GCATAGGTCCTTTGCTCATCATAATTTCCCTATTTCTTTTTTCCGTTAGAGTTGAACTA` | 4968 | A_95_P033166 AJ294474     |
| 5304 | 63 | 34 | 809  | CCCACGTGGCAAGATCTAATTGCTTTTCTATCCAAAATCAACCTTCAATTTGTAATTG   | 4970 | A_95_P178392 DV999089     |
| 5310 | 63 | 40 | 704  | ATGCTCCGTTCCCTCGTAAATATATACCCTTTCTTAGTCTTCACGAGAACAAAAATTC   | 4982 | A_95_P315618 FG196991     |
| 5312 | 63 | 42 | 599  | GTGGACTGTTCTTAAAGGCCATGTCTACAATATAACACCATACATGAAGTTTCACCCA   | 4986 | A_95_P303688 FG644381     |
| 5321 | 63 | 51 | 499  | AGCAATTTGAAAACCTGCAAAAACCAAAGGTACACTATGAGACCACTGGTCTGAGAT    | 5004 | A_95_P035323 AM087458     |
| 5324 | 63 | 54 | 296  | ATCCAGAGCTGGCAGATTTATATGTAAAGGGCTCTTCAGCTCCCCTTATTAAGAAC     | 5010 | A_95_P113202 CV021049     |
| 5325 | 63 | 55 | 420  | ATCTCGAGGCCTAGTGGTGCTAGTTCATTCTTCTACGGCTTCTTCTGATAAAAACTGG.  | 5012 | A_95_P072540 BP525991     |
| 5327 | 63 | 57 | 994  | CGATTTGCTTAGGTTTGAAGGGCATGTTACTGATCTGTTTCTGACCTTAGTTCCTTTTT  | 5015 | A_95_P201082 TA17348_4097 |
| 5328 | 63 | 58 | 827  | TTCCTGTTTGGTCAGTACTTCTGTCTCATTGAGCATTTCAGCTGGGATGGCACCGT/    | 5017 | A_95_P292323 FG148939     |
| 5333 | 63 | 63 | 116  | CGCAATGCTTGATGAGAGACTATGAGCAGGCAAATCATATTTCTTTCTCAAATAC      | 5027 | A_95_P110807 CV019919     |
| 5334 | 63 | 64 | 291  | GAACATAAACATTATGTGCAATGAACCTAGAACAGACGGTTTCGCTGTCTCAATCGA/   | 5029 | A_95_P218017 TA21076_4097 |
| 5339 | 63 | 69 | 397  | ATGCCACCTGAAGTTGCAAATGCACCTGAGAAGAATAAGCAGTTGCTGCTTAGTTCAG   | 5039 | A_95_P085255 BP529232     |
| 5342 | 63 | 72 | 123  | AGATATGTAACCTGTTCTACGCAAGGATTATTTAGACGTAAAACCTAGGAAGTGTGAA   | 5045 | A_95_P106472 CV017916     |
| 5344 | 63 | 74 | 800  | AGCGATTAGTTTCTGCTGCTAAAGATGGTGATCTCCAGAGCCAGCTTACTGGAGTTA/   | 5049 | A_95_P298158 FG145187     |
| 5345 | 63 | 75 | 563  | CAGATGAAGCATCTCAATGCTCGTGAAAAGAGATACATTGGCTTCACTTTTACAAGI    | 5051 | A_95_P125917 EB425045     |
| 5346 | 63 | 76 | 664  | TAATGTGAATCTGGGCAGAGAAGTAAGCTCAGCAGACCATGAGATAGTGTGCCTTI     | 5053 | A_95_P203837 TA17939_4097 |
| 5355 | 63 | 85 | 928  | TGATTGACCTCAAGAGGGCTTGGAGCAAGCTAAAGCTGAGCAAACAAGAACTTT(      | 5071 | A_95_P008971 TA16183_4097 |
| 5356 | 64 | 1  | 893  | AGTGGTCTGGTTGTGAGATTACCCCTTGCTTCTTTTTGATACCCTTGGCATGTGCTT    | 4905 | A_95_P212072 DV159330     |
| 5368 | 64 | 13 | 666  | ATGCACGTAGTTTCCCCTCTCACTTTTCCCTACGCTTATGTGTTCACTGATGCAAATTTI | 4929 | A_95_P205187 EB441986     |

|      |    |    |      |                                                              |      |                           |
|------|----|----|------|--------------------------------------------------------------|------|---------------------------|
| 5369 | 64 | 14 | 556  | AAACAGAGATACCTTCATTGCTGATCTCGCCGTGAGATTGTCACGGGACAAATCTAG,   | 4931 | A_95_P163142 EH622112     |
| 5372 | 64 | 17 | 488  | TCAGTTCAAGCTGAAAGTGAGGTGCAAAATGTGGGTGATAATAATGTAGAAAACAC,    | 4937 | A_95_P024466 DW004047     |
| 5378 | 64 | 23 | 848  | AACAACCTGAGAGCACATGACGAAATGTGCGCTGACCACATGCTGGAGATCGAAAAGT,  | 4949 | A_95_P117022 DV159810     |
| 5380 | 64 | 25 | 1072 | CGGGTACCCTATATTCTAAGACTTTAGATGTTTCACCTGAGATTGTCATAATCAACTG(  | 4953 | A_95_P008191 TA12790_4097 |
| 5386 | 64 | 31 | 88   | AGATTACTCTCAAGGTGACCAGACTATCAGAGAGATTACTTTCAGGGTGGCCCCGACT.  | 4965 | A_95_P095648 BP533282     |
| 5387 | 64 | 32 | 582  | GACAAAGATGTGGTCCGGTTTTTAATTCTACTTACTTACATTTTTCATTTGCATGGATT( | 4967 | A_95_P019121 DW002855     |
| 5388 | 64 | 33 | 749  | CCCAATTGAACTGCATCCAGTATGGCTTTTGTAAATAGTTACTACTATATCAGCTAAC/  | 4969 | A_95_P148497 EB677835     |
| 5390 | 64 | 35 | 723  | GGATTTGCAGGAAGAAAAAGACCCTTTTTGCTTTAGTTTAACTATCATCAGTACTGC    | 4973 | A_95_P224562 EB447840     |
| 5391 | 64 | 36 | 520  | TGTTGCATTTAAGCAAGCTACACCGAAAGCTCCCAAACATCTCTCAAATAGTAAACC    | 4975 | A_95_P152902 EB683232     |
| 5394 | 64 | 39 | 233  | AGGCAGTCAGTTGATTTCAAATTCATTGCCCTTCTGTTTGATGGTCGTCGCTTTCGT(   | 4981 | A_95_P103677 EH623004     |
| 5396 | 64 | 41 | 821  | TCAGTTGGCAATTAAGCTTTGTGGAAAAGATGGCGGAACTGCTTGCATGGCTGCATA    | 4985 | A_95_P296443 EB452161     |
| 5398 | 64 | 43 | 297  | GAAGAAAAGTCGACCGAGCCAAACTCAGTTTACAAGTATCAACAAGTATTTTGTCCGGT  | 4989 | A_95_P031726 BP137283     |
| 5399 | 64 | 44 | 761  | ACCACAATTGTGGGAACCTTGAATGTCTTTGTTTTTCTCCCTTTTGAATGAGTAATT    | 4991 | A_95_P010841 EB431255     |
| 5402 | 64 | 47 | 426  | ATTCCTCTACACCACTTTGAAGCTGAATTTGACAATTCTAAAATACTCGAGGATGGCT(  | 4997 | A_95_P149259 EB679035     |
| 5403 | 64 | 48 | 283  | GAAAAAATAGGGTCTAAGAGAGTGCTCTTCTCTCAATTGTCCATCTACAATTT        | 4999 | A_95_P005726 BP529971     |
| 5407 | 64 | 52 | 336  | CGAGTGAGGTCTGTTAAAACTTTGTGAATTATCAGAATGGATCTTGTGTTGTAATA/    | 5007 | A_95_P207492 TA18752_4097 |
| 5408 | 64 | 53 | 680  | CTTATAATGTATAGCTTATTGTTGCTGCGCAGTGTAGGAGTTTTCTTTAGAGTACTT    | 5009 | A_95_P265661 FG198611     |
| 5409 | 64 | 54 | 793  | TTGGTTCTTGAGCTACTGTTGTCTCCTTGCTTAGGTATGTAAATCATAACCTTTCTTT(  | 5011 | A_95_P199357 EB443300     |
| 5410 | 64 | 55 | 319  | AAGATAAAGAAGACACAAATTTAATATGGTTCGGTCAAGGTGACCTACGTCCACCAA    | 5013 | A_95_P032721 AF057375     |
| 5411 | 64 | 56 | 148  | TCTGTTCCGTCAAAACTATCCGAATCTGATTCTCACCGGATGTGAGATAAGTAGGCA/   | 5014 | A_95_P133757 EB435442     |
| 5413 | 64 | 58 | 600  | AATGTGTAGAAGTTCTCCGTTTCTCTGGATGTCTGTGAAAATTATAAGTCAAGATCCC   | 5018 | A_95_P027446 TC70136      |
| 5417 | 64 | 62 | 747  | TGTTGAGCGCATTAAAGAAGTATTGTGACATTTGCGGAGGTCCAGCTACCTTTATACA(  | 5026 | A_95_P150092 EB680158     |
| 5419 | 64 | 64 | 744  | AAAGAAGTGCCTTGTGGAAATTTGCAAATAGAGGTTGCTGTGGATTCCCTCTCGAGC    | 5030 | A_95_P029311 TA19358_4097 |
| 5421 | 64 | 66 | 753  | GACAGTGTTAAACTGGTTTTGAGTTTCTGTGGAATTTGTTCCAATCTGCTAGAAAAG    | 5034 | A_95_P005116 TA12237_4097 |
| 5423 | 64 | 68 | 181  | AACAGACTAATGTAGTGGCATTGCTGTTGAATTATGTGTTCCAAAAGTTTCTAGCCGT   | 5038 | A_95_P189832 TA14872_4097 |
| 5424 | 64 | 69 | 460  | AGAACCCCATACAGCAGTTATGGGGTCGAGATGGTAAAAAATTATCCGCACCAAATC    | 5040 | A_95_P209077 TA19110_4097 |
| 5428 | 64 | 73 | 1473 | CTATCGAGTTTCAAACAGTTGGCGAGACGATTTTCGGTGATAAGAGAATTATTGTAT/   | 5048 | A_95_P185657 TA13961_4097 |
| 5431 | 64 | 76 | 0    | CGGATTTACCCGGTTTACATTATTGGAGTCTTGAAGGAAGCAGCTCAACACACCAG(    | 5054 | A_95_P308383 A_95_P308383 |
| 5434 | 64 | 79 | 502  | TCGGGCTGGATTTCCGCATTTCTTATTCATACTTTCTGCTATTTGGTACTATTAACCA`  | 5060 | A_95_P286053 FS436570     |
| 5435 | 64 | 80 | 827  | AGGTATTTGCATCCTTTCAAGTTCTTGCCGATCGTAAAGGAACGAACACTCTCATATG   | 5062 | A_95_P261891 DV160431     |
| 5437 | 64 | 82 | 845  | CTTTTCTGGGGCTGTGATCTTATGATTTAGCAAAGGTCTTGTACTCCCCCTACTGCTC   | 5066 | A_95_P205452 TA18291_4097 |
| 5440 | 64 | 85 | 641  | TATTCAAATGATATTCTATAGTGGTTTTGGCTGTTTGGGGAGGTACACCTTCTTTCA1   | 5072 | A_95_P149387 EB679215     |
| 5442 | 65 | 2  | 726  | AAGGCGTCACGGTTGTCTTTGTTAGACAGGGGTTTCAATTATACTATTGCTCACATTC(  | 5075 | A_95_P119072 DV162148     |
| 5445 | 65 | 5  | 776  | GGCCATTTAACAACACTAGTGTTACGTGAATAACAATTTTGATTTTCTTCTGGTTGGTG( | 5081 | A_95_P195627 DW004694     |

|      |    |    |      |                                                              |      |                           |
|------|----|----|------|--------------------------------------------------------------|------|---------------------------|
| 5447 | 65 | 7  | 316  | GGTTAACTTCGCCCTTTTCTTCTCAATGATGGTACTTTGACTTAAATTTCTGAAGC     | 5085 | A_95_P006271 TA14481_4097 |
| 5450 | 65 | 10 | 682  | ATTATGTAAGGTTTGGACTTCAAATGTTCTCCCATGTCATATTTGGTGACAAGTTGGC   | 5091 | A_95_P136207 EB439855     |
| 5459 | 65 | 19 | 449  | CTTTTTCTGGCATGCTCACTTGGCAGCTACTGGAAGCTCTAGTTAATCTTATGCCATTT  | 5109 | A_95_P075685 BP526792     |
| 5460 | 65 | 20 | 1164 | GGTATGAAGGCTTTTATGGATTTTACAAGGGGATGGGCACGAAAATCGTACAGAGT     | 5111 | A_95_P206037 TA18419_4097 |
| 5463 | 65 | 23 | 724  | TTCGAGTGACTTAGCAGTCGCCCTTTGTTAGTGAGATTTGACAAAATGCTTGGTTTT    | 5117 | A_95_P261131 EB678007     |
| 5465 | 65 | 25 | 887  | CCGGCTTGGGGAATGTTTGTTCGACAATTTTCATCTTATAATCGACTTTGTTAAATTTT  | 5121 | A_95_P234504 EB677577     |
| 5466 | 65 | 26 | 239  | AATCTCTGTTCCGCCATTGATTTTCTCCATTGTCAATCTCTGTTCCGCAGTTGATTTTC  | 5123 | A_95_P097988 BP534285     |
| 5467 | 65 | 27 | 875  | TCAAGCAATCTATGGATGTTCTGATGATGACAAAGGACTGTGCCCTGCTGGTACAT     | 5125 | A_95_P267741 DW000842     |
| 5474 | 65 | 34 | 753  | AAGTACATGGATAGAGCTGCAAACAGCCAAGTCCGAGAGGTTGCAATCATCATTGCT    | 5139 | A_95_P287303 FG175007     |
| 5475 | 65 | 35 | 327  | AGGCCGAGCTATACATTTTCATGATTTTACCAATATATCCTCACCAATCTGTTGTATTGA | 5141 | A_95_P026036 BP131251     |
| 5476 | 65 | 36 | 536  | TGTTTGGCGTTTGTACATACCTTGAGATAATATACAGGGAATTATGTGTTTCCATATCC  | 5143 | A_95_P020081 EB446960     |
| 5477 | 65 | 37 | 498  | CCACAGGCAACTGAATTTTCTCAAAAATTTGCATGCTTTGTTGTCTTCTCACTATAG    | 5145 | A_95_P135947 FS399667     |
| 5479 | 65 | 39 | 675  | AATTGGGACCAGCATTGAGCAAGGTTGCTTGTGTGGAATGAACTAGAATCCATCGT     | 5149 | A_95_P185117 TA13845_4097 |
| 5480 | 65 | 40 | 880  | GTGTTTGGTTTGTAGTGTATTGTACTGTAACGTTTTCGTTTTTGAAGAAGAAATCTC    | 5151 | A_95_P178207 TA12181_4097 |
| 5481 | 65 | 41 | 487  | GTCTTTGTACACGATTAGCAATACCGCACTTAATATTACTAATGTTGGAGTAACTAC    | 5153 | A_95_P264816 FG638060     |
| 5485 | 65 | 45 | 702  | TGAATTTTCATATATTATCTGAAGCTCATCTCCTGAGTTTTCCGGCGATGGCGTCAGAT  | 5161 | A_95_P144572 FG164439     |
| 5487 | 65 | 47 | 480  | TAGTCAAGTTCACGGCATGATAAACACCTCAATGCTAGTCTTGAATATTGATTTTGG    | 5165 | A_95_P286683 FG642353     |
| 5492 | 65 | 52 | 771  | CATGCTTGCCATATAGCTAGGATTTACGTGTAATAGGGTTTTGAATAAGAGTGTCTTT   | 5175 | A_95_P010121 DW000310     |
| 5496 | 65 | 56 | 754  | TCTCGCCATATTATTTCCCGTTTCGTTTTCTCGAATTTGTACCAAAGACAGAAAAATTT  | 5183 | A_95_P213992 TA20165_4097 |
| 5497 | 65 | 57 | 631  | TGTTAGGTAATTCATATCCTCTCTGCTGCTGGTCCACTATCTCAGAACCATATCCAAG   | 5185 | A_95_P037128 BP128917     |
| 5507 | 65 | 67 | 794  | AGCAAGCGAGAAGAATACAAAGAAGCTTGTGGAGAAAGATCCCAGGCTTGTAGAAAT    | 5205 | A_95_P193357 EB678282     |
| 5511 | 65 | 71 | 1210 | TTGTAAGTGTACCATAAATAAGCAGTTTGGCGGCCACAATGCAAAAATTTGATTTGC    | 5213 | A_95_P189312 TA14762_4097 |
| 5514 | 65 | 74 | 754  | CCTCACATAGTTAGCCTACTTTATTTGGACTTTATTGTTGGTCTTATGGATTTTGTAC   | 5219 | A_95_P148092 EB677277     |
| 5520 | 65 | 80 | 582  | AGGAGGCATGTTCTTCTAATCTCAATCCTCCATTCCCTGGTATAAAAATAAGCTTCAAT  | 5231 | A_95_P032396 AB032548     |
| 5524 | 65 | 84 | 0    | GAAAAGTAAATGGTATGCTCATGAATGATAAGCAGTATAATGTGGCATTCTCCCGC     | 5239 | A_95_P310268 A_95_P310268 |
| 5525 | 65 | 85 | 673  | TCTAAACAATTAACCAAGTCCTTCTCTCTCCCTATGTTGGCTGCTCGTTCTGGGTT     | 5240 | A_95_P299288 FG178141     |
| 5526 | 66 | 1  | 592  | TGCAGAAGAACAATATATACTGACCCCTCATTACTTTGAATTGATGATGTAGTTCTC    | 5074 | A_95_P233244 EH618209     |
| 5527 | 66 | 2  | 794  | TCAGCACTGTTACATCTTCATGCCAGGGCAGTGTGTTGGTATTATGTGAAAGAAA      | 5076 | A_95_P293548 FG138251     |
| 5534 | 66 | 9  | 1119 | ACTACCACCCTTGATACTGAGTTGGCCCCATGATTTTTACACGACGGGTTACAGTATT   | 5090 | A_95_P007886 TA12921_4097 |
| 5537 | 66 | 12 | 813  | GGAATTTTACATTCCTATGCCACATACCTTATTACCCTCAATGTTAAGGTTTACTT     | 5096 | A_95_P015776 AB050837     |
| 5538 | 66 | 13 | 567  | CCATGTTATGGTTATTGCTGGCCTTGATCCTAATTGTGAGGCATTTAGGCTTTTGA     | 5098 | A_95_P213092 TA19975_4097 |
| 5539 | 66 | 14 | 969  | AGTTCACTTACTGTGGATGATCTTTTGTGACCTTTGAACTTATAATGGATTAATGTTG   | 5100 | A_95_P124517 TA16780_4097 |
| 5540 | 66 | 15 | 949  | CCAAGTTGCTGTTATGGTACCTCTCTGATGATCTATTATGGGAGTGTGTGATGTGGC    | 5102 | A_95_P190537 EB677519     |
| 5544 | 66 | 19 | 805  | TGTTTTGCTGTGCTTTTGTACTGGATATGAGTTGGAACGTCTGTTTGAAGCACTGT     | 5110 | A_95_P011776 EB683024     |

|      |    |    |      |                                                               |      |                           |
|------|----|----|------|---------------------------------------------------------------|------|---------------------------|
| 5547 | 66 | 22 | 112  | GCGGCGCTGTCAGAATAGAATGTTGATAAATTTTTCTACTAAGAAATGAGTAGCCTTTT   | 5116 | A_95_P142252 EB445773     |
| 5550 | 66 | 25 | 486  | GCTTGAGATCCTACCGATCCTTCATAATCCCCATGAATATCCATGATTCACTATTTCAA   | 5122 | A_95_P033829 AJ633040     |
| 5554 | 66 | 29 | 798  | CAAGGCAATAGGCATGATGTTATAATGGCTGGAGTGCCTCTTATCCATGACATT        | 5130 | A_95_P225902 EB441267     |
| 5558 | 66 | 33 | 46   | CTTGCTTTTACTTCCTGATACCTGAAATTGAACTTGCAGCAATTGAAAACGAACCAA     | 5138 | A_95_P213802 EH618467     |
| 5560 | 66 | 35 | 493  | AATTTATATGGGGTGATGATGCAGAGGATTTCCGGCCAGAGAGATGGTTTGATGAA      | 5142 | A_95_P046071 BP131301     |
| 5569 | 66 | 44 | 769  | CCCATCAAATGAAGTCAAGTTAAGGCCTTTGCGCAATGTTTCTGAAATTCTGATGAA     | 5160 | A_95_P160097 EH618737     |
| 5572 | 66 | 47 | 708  | CAAACACAAGAGTCTATTCTTGTTCTTGAAGAAGCTGCATCTGATTTTAAAGAAGTGA    | 5166 | A_95_P302623 FG197710     |
| 5574 | 66 | 49 | 676  | CTTTTGCATCAGACTCAATGTTTATCGATATAAAAAGTACAGGTAAAGTCAAGTTGCT    | 5170 | A_95_P129322 EB429062     |
| 5576 | 66 | 51 | 847  | GAGGTCCCTTGTTGTATAACAAACCTTTGGTTAAATTCAATGTGTTGTATTCTGTCTC    | 5174 | A_95_P229334 DV160558     |
| 5578 | 66 | 53 | 436  | AACACACACACACACATACGAGAGACAGAAGCGGGCAGAACAAAAGCAAATATAT       | 5178 | A_95_P096028 FS405146     |
| 5580 | 66 | 55 | 607  | ATTTTTGGATTGGACTGAGTGTGGATCGAGGGTTATAAATAAACAAATGGTTGTAT      | 5182 | A_95_P202987 DW004949     |
| 5581 | 66 | 56 | 530  | CCCTTAATGCTCTCGTGTATTTATTTATTCATTCAAATTGTGTTGCAATGTCAGGACTT   | 5184 | A_95_P006621 EB683364     |
| 5583 | 66 | 58 | 386  | TTTGGTCCCTTGTTTTCAAACAGATGATCTTTGTGTTATTGGAATTCAGAAGAATCAA    | 5188 | A_95_P276758 TC67705      |
| 5584 | 66 | 59 | 856  | TGAGGGGATGCCTCATAACTCGAATACTGTAAATCATTTAATAGCATGCGTCTTGGTC    | 5190 | A_95_P217752 TA21008_4097 |
| 5585 | 66 | 60 | 800  | GGCTCTGTAATACTACAGTTCGGAAAATATGCAATGATGTTTGTCTACGTTCAAGTTA    | 5192 | A_95_P107927 TA12124_4097 |
| 5586 | 66 | 61 | 225  | GAGCTACTTTCTTGAAGTTTCTTGCAGAAAATGAGTCAGCTTTTGTATCTTCTATATTG   | 5194 | A_95_P155657 EG650183     |
| 5590 | 66 | 65 | 947  | TAGGGTTTATAGGAAATTGTTGCGAGAGAATCTGTTACCAGTTTTTCTCGGCTGAG      | 5202 | A_95_P182817 TA13309_4097 |
| 5595 | 66 | 70 | 480  | AATGGCTATAGTGCAACAGTGTAGTATTTGTCCTTATTCGATGTAAATAAGGATGG/     | 5212 | A_95_P125447 DW005251     |
| 5601 | 66 | 76 | 852  | TTCAGATTACATTTCAACCATATGGTGCTCATAGGATGGTATTTCTGCTGCTGGAGC     | 5224 | A_95_P295843 FG142060     |
| 5602 | 66 | 77 | 823  | AAGGATGAGTTTTTAGAATGGGCAAAATCAGAAGCGCAACTTCTTGTCTCAAGCTGCT    | 5226 | A_95_P147477 EB451919     |
| 5605 | 66 | 80 | 3135 | ACCAGTGGAACGAAACAGTTGAAGAGTTTGCCAATGCATTGAGGCAAGTGTCTAG/      | 5232 | A_95_P240424 DQ213015     |
| 5607 | 66 | 82 | 409  | GCAGACTCGGAGTGCATTGTACCAATACATGATGCTAAAATCTGTCCATAGTGCATA/    | 5236 | A_95_P155807 EG650273     |
| 5610 | 66 | 85 | 156  | ATACAATCTGTACTTTCTACTAGGCCATATGTGTACTCAAGTGGTCGCACCCGTA       | 5241 | A_95_P049306 BP132130     |
| 5611 | 67 | 1  | 977  | TCTTTCCCTTGTGTAAACTGCCTTAGTTTGGAGCTTGATTTGACCACTCCTAGTGT      | 5242 | A_95_P229104 TA18446_4097 |
| 5613 | 67 | 3  | 94   | CTGCGAATGAATGGAGCTTTTCTTTTATGTATAGAGAGAGAGAGAGAGAGAGAGAG      | 5246 | A_95_P113107 CV021009     |
| 5615 | 67 | 5  | 982  | AATACTGCTGATTAAGTGCATGATGCTCATTCTTACATTTAAGTTGTTACACCT        | 5250 | A_95_P237119 DQ365933     |
| 5618 | 67 | 8  | 604  | TGTCCTAGTATTCAGCCATTTGGGTACGTAATCCCTTTTTGTGCACTAATTTTAAAGT    | 5256 | A_95_P291288 DW003644     |
| 5621 | 67 | 11 | 528  | TCTTGCCTCAAAGTGCACGCGAGTGCACATGACGTTCTCTAGTTTAAACCGAAGCAAT    | 5262 | A_95_P046846 BP131504     |
| 5623 | 67 | 13 | 605  | ATTCGGAGTATTCTTGATTGCATTTTTAGTGTAGTTGATCTTCGCTATGAGATGATAC    | 5265 | A_95_P001551 FG640794     |
| 5630 | 67 | 20 | 778  | TGCTGGATCTTGAGCTGTGAAAATCTCCAGCTTATTATGAAGGAAAATTATCAACTC     | 5279 | A_95_P021776 EB439530     |
| 5635 | 67 | 25 | 0    | GCTGAAGGCACCTAAATTTGCATTTGAAATTATAATATTGTTGGATTTGTTTCCCT      | 5289 | A_95_P020171 A_95_P020171 |
| 5636 | 67 | 26 | 2825 | GTATGATTCGGCCTCTCCTATGTAATCTCCTGCCCTTTTTAATGCAGTTTGTTTTGT/    | 5291 | A_95_P249812 AF321137     |
| 5643 | 67 | 33 | 1135 | GAGACTGTAAACTGCCATTGCGAATTATAGTTGTGCTGTAGTTTGTTCGATTTTCA      | 5305 | A_95_P014981 TA14610_4097 |
| 5644 | 67 | 34 | 427  | TTCGTTACATTATCAAACCTTGCAGACATACAAACCTTAAATACAGTTCCTGTGAGCTTAC | 5307 | A_95_P211667 FG626323     |



|      |    |    |      |                                                             |      |                           |
|------|----|----|------|-------------------------------------------------------------|------|---------------------------|
| 5645 | 67 | 35 | 276  | AGGATCTTCAACAGAAGAGTCATCATTTTCATCTTCAAGCAGAACCCCAAATTAGCC   | 5309 | A_95_P062990 BP135662     |
| 5647 | 67 | 37 | 919  | GACTGTTCAATAGTATACATTCTATAGTTGTAGACCTATATTGTGAAGCGACGGTGG/  | 5313 | A_95_P021646 EB438528     |
| 5652 | 67 | 42 | 820  | AGACGACAAGGACTGTGGAGGACTTTGTAAAGGTCATTGGCAAGCCATATCAAGAT/   | 5323 | A_95_P273086 EB681364     |
| 5653 | 67 | 43 | 783  | TTAGGCATACAAACCCGATGACATCCAACATTGTGAGTTTCAGCTGACTCTTGTGACC  | 5325 | A_95_P254039 EH619468     |
| 5654 | 67 | 44 | 321  | GCGTATTTACTTTGCCTTGGATTATTGCGTCTTTTTGTTCCCTTTTCAGAACTTTGCAC | 5327 | A_95_P102152 TA12957_4097 |
| 5658 | 67 | 48 | 589  | TAATGCTTGGGTTCTCAGTTCCTTTGCCGGTCTTATTGTTCAATGGTATTGAGCTCATT | 5335 | A_95_P100603 BP535448     |
| 5660 | 67 | 50 | 820  | GCGTTGAGTCTATATTTAATGTGACAGCACTTGAAGATAAATGTAATGTGAGTTTT    | 5339 | A_95_P246612 EB424973     |
| 5671 | 67 | 61 | 748  | ATCTTGAGAGCTTACGACGTTTCATGCATTAAGCCTTGTCTCGAGGACAGTTCTTTT   | 5361 | A_95_P190842 TA15101_4097 |
| 5674 | 67 | 64 | 838  | GCCTTTTTGCTTGTCATTTTAGGCAAGTATAGTAGTTTTCAGTCTTAATGCTGTCT    | 5367 | A_95_P010731 TA12837_4097 |
| 5677 | 67 | 67 | 567  | ACATGTATCTAAGCTCTTGAACATTTAGCTTGACTTAATGATAGATGTTGACGAGTTC  | 5373 | A_95_P301703 FG638349     |
| 5680 | 67 | 70 | 821  | CTATACAATGGCAGTTTTGGCAATCATATTGGTGGGGTTGCTTTATGGTTTCTTCATA/ | 5379 | A_95_P291843 EB425061     |
| 5682 | 67 | 72 | 614  | TTTTCAGCAGAACATGCTTAAAGCCTTATGAAGATACTTTCTTTGGATGCCTGGTAAA  | 5383 | A_95_P156837 FG640413     |
| 5690 | 67 | 80 | 348  | ACTGTAAGACAAAGCCCAGCCTGACAAAGGTTTCAGGTAAAGATACCGATAGTGATCC  | 5399 | A_95_P103732 CV016663     |
| 5694 | 67 | 84 | 891  | TGAAGAAATTGGGGCTGATTTTTATGTAAGCAACTTGCAACAAGTGGTTCTTTGCCCT  | 5407 | A_95_P230849 EB428657     |
| 5695 | 67 | 85 | 432  | TTGATCTCAACATTGTGATACGGACTGTTGTATACACGAAGAGAAGCTTCAGTAGG.   | 5409 | A_95_P154617 EG649672     |
| 5696 | 68 | 1  | 2197 | TGAAATTATGGCTAGGGGACTTTTCGCCAAACATCCGCATTGTAACAAGCTGTAAA/   | 5243 | A_95_P111588 AF194945     |
| 5698 | 68 | 3  | 469  | GATCCTTGTACCTGGTGTAGTCTTAGAGTTTGTAACTGAATGGCAAATTGGAGAAC`   | 5247 | A_95_P196697 EH623258     |
| 5700 | 68 | 5  | 789  | GACATTGTGAACAGCTGTCCACGTCATGGTATTGCTAGAAAAGCTGTAAGCTGCC/    | 5251 | A_95_P296188 EB450614     |
| 5701 | 68 | 6  | 735  | AATGTATCCGCTGCCAATGAGTACTAAAAGACGCGGAGCAAGGATTGCTGGAAGAA    | 5253 | A_95_P292678 EB428060     |
| 5709 | 68 | 14 | 532  | GATCATCTATGTGTAGCACTTACTGAAAACACTATCGTCTATGTGTAGCGTTTGAAGA  | 5268 | A_95_P111577 TA12889_4097 |
| 5713 | 68 | 18 | 471  | TTAGTACGCGGGCTATGTTATATATGAATAGTGGACCATTAAGACCATTTTATACAGC  | 5276 | A_95_P271916 FG636965     |
| 5714 | 68 | 19 | 422  | GCAGCAGATAAACTTGAGGAGCAAACAAATGAAAACCTCAGAGAAGATGCCTACAGT   | 5278 | A_95_P086050 BP529441     |
| 5716 | 68 | 21 | 544  | CTGAAACGTCTATATAGCTTTTGTGTCAGGTTACTGGATCAATGCCAAATTTTGTGCA  | 5282 | A_95_P266666 BP534517     |
| 5721 | 68 | 26 | 813  | TTAAACCATGTATTATACCTCTGGAAGGTGGTATTGCATCTGGATTCAAGAAGCCAG/  | 5292 | A_95_P125622 EB424706     |
| 5724 | 68 | 29 | 394  | TGGTCAGTTTTGTTACAAGGTCAAACATTTAAGCACGTACAAAGACACCTTTACTGC   | 5298 | A_95_P098843 BP534667     |
| 5727 | 68 | 32 | 345  | TTGGTGGGGGTGAGGATTAGTTGAAATCTTGTGATGGAAGAGAATTTTCTAATAG/    | 5304 | A_95_P099233 BP534847     |
| 5733 | 68 | 38 | 656  | TCATCTTCCGTGAAGTTCATGTTGTACCTGATTGTGTCCTTCTGTGACTGAAGATTC/  | 5316 | A_95_P126162 TA16431_4097 |
| 5735 | 68 | 40 | 789  | ATGTGATACTTGGCTAGCTTATTGCTGGACCGCAGACCCATTTGGAATGTATTAC     | 5320 | A_95_P283578 FG148386     |
| 5737 | 68 | 42 | 744  | CCACTCAAACCATTTTTACCTTGTAAATATGCAAGATGCTTACAGGGATTTGGATTTT  | 5324 | A_95_P115367 DV157540     |
| 5741 | 68 | 46 | 392  | GTTGATAATTTTACATAAAAGGGGGCAGGGGGTTTGGGAATCCATTGCAATGAGCC/   | 5332 | A_95_P079665 BP527821     |
| 5746 | 68 | 51 | 898  | ACTGGATTACAAAGGGCAACCTGCATGTCTGGCACAGTCACCTCAACTTCACAAACA/  | 5342 | A_95_P191137 DV161215     |
| 5747 | 68 | 52 | 308  | CTTGAATAAGTTGTGTAGATGGATAGCTTGGAGCTAAGTTGAGTTACCTCTTGTTTA   | 5344 | A_95_P031916 BP533836     |
| 5748 | 68 | 53 | 608  | TGGTGTGGTTTACAAGTGAATGCTAAACAAGTAGACATACCAAGATGATTGGATCA    | 5346 | A_95_P032081 FG644694     |
| 5751 | 68 | 56 | 495  | GTCAAAGTGTAATAAGCTACAGATTATTGTTTTGCCTGGTCTTCAACAAGCTGAAATT  | 5352 | A_95_P002296 TA16918_4097 |

|      |    |    |     |                                                              |      |              |              |
|------|----|----|-----|--------------------------------------------------------------|------|--------------|--------------|
| 5754 | 68 | 59 | 874 | GATACAGATATCCATCTGGGTCTCAAGCTCCATATAATGTCACGGTGAGTTTGTAGT    | 5358 | A_95_P296893 | EB680305     |
| 5757 | 68 | 62 | 123 | TCAGGTGTGCATGGATTATAATCTATTATATGGGTGATACACTAGACTAATGACTTCC   | 5364 | A_95_P130607 | EB430659     |
| 5761 | 68 | 66 | 663 | GAGCTTTTGTGCTGGTTAAATTTTTGGGCCTTAATGTTAGTAGCTTTCAATTGTTACTG  | 5372 | A_95_P116487 | DV159239     |
| 5762 | 68 | 67 | 998 | GGTGTAGGAGCTTCATTATCAAGTGTTAGGTAAGTATCTAGGTTTGGTATGTTTAAT/   | 5374 | A_95_P216092 | TA20629_4097 |
| 5763 | 68 | 68 | 514 | CGTTAATCCATGAACAGGATCTATACATCTCGATCGGAAAAGAATCAAGAGAAAAAC    | 5376 | A_95_P201017 | TA17335_4097 |
| 5764 | 68 | 69 | 397 | AGTCTGCTTATATGGGACACACTACTAAGTGATCCTGAAGGACCTCAGGAAACGTTG    | 5378 | A_95_P266466 | BP533691     |
| 5765 | 68 | 70 | 109 | TTTATGGCATGTAATGGGCAGCTATTTTCATGAATGAAGAATTTTCAGCTATTTCTCTG  | 5380 | A_95_P113227 | CV021064     |
| 5768 | 68 | 73 | 889 | ATTTGGTTATGGACCCTTTGACCTTGGATGTCTATAGCTCACTGGTGGCTCTGTCAT    | 5386 | A_95_P226864 | DW001145     |
| 5771 | 68 | 76 | 553 | TAGTGGGGTGTCAAATAAAAAGGTGGGGGCAACTTTAGAGGTTCTGTGTCATGACA     | 5392 | A_95_P052986 | BP133061     |
| 5772 | 68 | 77 | 804 | CGCCTATTGTTTTCTCCAATCTCTCTCCATTCTTCTGCATGTTGATGCATAACCTGTAAT | 5394 | A_95_P203957 | EB677471     |
| 5773 | 68 | 78 | 735 | TAACGATAATTGCAAGCAGCGGATGAGCAAAGCTTAATAAGGAATTTTTGCTTGAAC    | 5396 | A_95_P152977 | EB683289     |
| 5774 | 68 | 79 | 823 | GCAGTGATGCTGCTTGATATATTCCTGTTCCCTAAAAGACTCTCTATCTTGATTTTATT  | 5398 | A_95_P287888 | FG172969     |
| 5779 | 68 | 84 | 540 | GTTCTTTTAGAATCTCTGTTTGAATTCTGACTTGGATGTATACAAGTAGAATGCACGG   | 5408 | A_95_P278863 | AM824642     |
| 5785 | 69 | 5  | 180 | CTGGGAAGTATTAATAAATCCAATGCAACTGTTTTTCTTTCTTTGTCCAGTCGTATCTCA | 5419 | A_95_P163582 | EH622612     |
| 5787 | 69 | 7  | 439 | AACAATTGGCGAGAAGACTAAAATAGTTTGGGAAAAGTGTATCCTTCTATAGTTTGC    | 5423 | A_95_P124447 | DW004283     |
| 5788 | 69 | 8  | 679 | AAGAGGGAGGCTTGGTTGACTTATGTCACTCTCATTCTGTTGTCAGTGGGGTTATCA    | 5425 | A_95_P151237 | EB681458     |
| 5790 | 69 | 10 | 435 | GAGTAAGGTCTGTATGCACTACTCTCTAGACTCCACCGGTGGAAATACACTGAAT/     | 5429 | A_95_P071440 | BP525705     |
| 5794 | 69 | 14 | 779 | GCTATTCGACAGCACGGATTCTTCTACGGGTGGACTGCATTACTTTGATCCCTGTTAT   | 5437 | A_95_P285438 | FG151649     |
| 5797 | 69 | 17 | 604 | GCCAAGAGAGTTGCTAAATCCTGTGGAGTACCCACTCCCAGCTGTTAGAATCTTAACA   | 5443 | A_95_P000551 | FG640862     |
| 5801 | 69 | 21 | 774 | AGCATTGGTAAAATGAGCAACACATTAGATGAGCTTGTTTTACGAACAATGATCTTT    | 5451 | A_95_P128772 | EB428503     |
| 5804 | 69 | 24 | 393 | TATCCGAGATTGATGCACCAATTTGGATGTACTATTCTAATTTGCATTGAAGCATCAG   | 5457 | A_95_P072990 | BP526097     |
| 5805 | 69 | 25 | 282 | ATTAGGAACAAGGACACAAGTTACCCCTCTTTGTAATCCACTTGGATTATGCCCTCG    | 5459 | A_95_P126717 | AJ719141     |
| 5814 | 69 | 34 | 697 | ACGGATTGACTCCTAATATTGGATCTGCTCACCATTTACTGTTGTTTGCTAAACAGCA1  | 5476 | A_95_P136337 | AF026389     |
| 5819 | 69 | 39 | 896 | ACCATGGAATTGATGTTGATGTATAATATGTCATGGGAATGCTCGTTAAATGTTGTTT   | 5486 | A_95_P247632 | EB680718     |
| 5820 | 69 | 40 | 808 | CAGGCACATGAAAGCGGAGAAGTTTCGTCTCACCTAAGTGTAATTTATCAGCTTTGCT   | 5488 | A_95_P146737 | EB450851     |
| 5821 | 69 | 41 | 67  | GGCTGGCTCGAAGTATTGTTTGTATGTTGCTTAAGATACTGAATTCGAACCTATTTT    | 5490 | A_95_P105467 | CV017474     |
| 5827 | 69 | 47 | 655 | CTGTAAACAACCATCAAGCGATGCTTAAGTTTTATGTCAAGATAAGTACTGTGATATT   | 5502 | A_95_P020501 | TA12838_4097 |
| 5832 | 69 | 52 | 475 | TGAAACACTCAGGCAAGCAGGCAAGCAGAGATTGTTAAATGCAATAAAGCAAAGCC     | 5512 | A_95_P059316 | BP134707     |
| 5833 | 69 | 53 | 452 | GGGGAACCTTCTATCTTAATGCCCATGAAAAGATTGATGTGCTTAAAGTTTTCAAAC    | 5514 | A_95_P020551 | FS406426     |
| 5835 | 69 | 55 | 751 | ATTCAGATGTGTTGTGCACCTCTGAACACATACTTCTAGTCTGTGATTACCACCTGTA1  | 5518 | A_95_P253354 | EH620928     |
| 5848 | 69 | 68 | 994 | GAGCTCGTCGAAATACTTCTAGTATTATTTATGGCCAAATGTCATTGACATACATT     | 5544 | A_95_P011596 | TC43080      |
| 5849 | 69 | 69 | 566 | AATTCTGAAGTCCAGGAAGAAATGCCAGAAGCTGCTGAATCACCACGTACGGTTGAT    | 5545 | A_95_P080020 | FG142351     |
| 5850 | 69 | 70 | 434 | GAACTCTGATTTCGCGCAATTGATATATAGGCCTTTTGGATATTGATTTTCTTTAGC    | 5547 | A_95_P088398 | TA12644_4097 |
| 5852 | 69 | 72 | 281 | TGGACATTTTCTGTTGGGTATGAAATCTGAAGTTCGTAATCCAACAAAGTGGTGT/     | 5551 | A_95_P142117 | EB445679     |

|      |    |    |      |                                                             |      |                           |
|------|----|----|------|-------------------------------------------------------------|------|---------------------------|
| 5855 | 69 | 75 | 633  | ACTGGTCCTGTTATGGTTGTTAAGAGGTTTAGACATATGAACAAAGTTGGCAAGGAA   | 5557 | A_95_P238759 AF246967     |
| 5862 | 69 | 82 | 97   | GAATTGCCACTTTTCATTCCATACTCTGTATACCATATTCTCAAGATGCAAAAGAGATC | 5570 | A_95_P112647 CV020775     |
| 5864 | 69 | 84 | 154  | TACGAAGTGTGGTCTGAGATTCATTTTCGTTGGGGGTATAAATTAGTTGAAGTAA     | 5574 | A_95_P045436 BP131138     |
| 5865 | 69 | 85 | 263  | TTTCTTAGGTGGAAACAAAGTGTGGGTCAGTAATGGTCATGTTGGTGGCTTCTCTTC   | 5576 | A_95_P214467 TA20269_4097 |
| 5867 | 70 | 2  | 794  | ATTATTTGGGACCGAGCCATTGTAGTTGTTGTATATGGCCTTGATTTACACACAAAA   | 5414 | A_95_P290463 DV999676     |
| 5873 | 70 | 8  | 91   | TGTGCTCATTCCATTGGGGGAAGGATGACTAAGAAAGATATGTCATTTTTTGGTAAT/  | 5426 | A_95_P032091 DV159517     |
| 5875 | 70 | 10 | 81   | CTCTCTGCATATATAGCGATGTGATCCTTATAGATTTTCTCATACTCTAAAAACCCT   | 5430 | A_95_P006751 TA17411_4097 |
| 5878 | 70 | 13 | 734  | ACTCTTATCAAATGCGCTACAGCCTAATTGATACCTCATGAGGAATTTTCTTGGCGC   | 5436 | A_95_P229299 DV157486     |
| 5884 | 70 | 19 | 478  | GCTTGATTGTGTCAAAAGTGTACTGCTTTTCGTTTGAATCTATTCGTCATACAGTTA   | 5448 | A_95_P175396 EH666079     |
| 5889 | 70 | 24 | 636  | CTGAGTTCGCGTCGTGTTCACTAATGTTGTTGTACCATTCTTGTGTTTATAATGTAA   | 5458 | A_95_P301353 FG636212     |
| 5893 | 70 | 28 | 882  | AATGATCTCATGACTGAGGTACATTTGCTCTGTGAATCTCAGGAAGACCTGGGTCTC   | 5466 | A_95_P258531 FG159147     |
| 5895 | 70 | 30 | 742  | GAAGCAATGTGCTGTAGTCACTGCCGAACTGAAGGACTAGAGTAAAATCAGCCGCT    | 5470 | A_95_P258481 FG161897     |
| 5897 | 70 | 32 | 777  | CTTGATGTTTACTTGTCCATTTTCGGAGGCTGCAATTAGAAACATATTTGATTCTGATT | 5473 | A_95_P027336 EB680804     |
| 5903 | 70 | 38 | 268  | GGCACTATTAGTCTGAGACTGCAGCTATTGTCTAGGGCATTAGTTTATATTTTACTTTT | 5485 | A_95_P097573 BP534111     |
| 5904 | 70 | 39 | 705  | CACTGTTCAAAGATCTTGTTCAATTTGCAAAAGCCAAGTCTCCGTCATCGCCAAAC    | 5487 | A_95_P088578 BP530137     |
| 5907 | 70 | 42 | 353  | GTTGAATAGGTATCCCCCTTTTTTCTCTGAAGGGATATCAATAAGCATCAGTCTGG    | 5493 | A_95_P096233 BP533534     |
| 5908 | 70 | 43 | 754  | TCAAAGGAATTGCTTTTTCTGTTTCTGGCAGGGTATTCTGCTTGAGATTCTGTATCA   | 5495 | A_95_P136032 EB439598     |
| 5911 | 70 | 46 | 682  | ACTGTAATTATCAACAGCTCCAGAAAGTCAGTCACCAACCGGCATTATCAATCGTGAC  | 5501 | A_95_P195782 TA16192_4097 |
| 5913 | 70 | 48 | 831  | TTTTTATATTGCTCGAAAACAAAAACCATGAGTAGATGTGGTTTGGGAAGGGGGC     | 5505 | A_95_P185782 EB431659     |
| 5917 | 70 | 52 | 498  | GGTTGGTAGTGGACTGAAGAAGTTGAGTCTGATAAATGTTTGTGAAGAGTGAATG     | 5513 | A_95_P073245 BP526170     |
| 5922 | 70 | 57 | 799  | GCCAGATATGCCTCCATTTGTACATCCTCTATTTCTATATATCATCATATTGTGAAC   | 5523 | A_95_P016451 TC45900      |
| 5925 | 70 | 60 | 732  | TCTAGTACAAGAATATACATGAGCATTATTGGAATTCGGGATTGGTGCCTTTTATT    | 5529 | A_95_P059650 EB446106     |
| 5931 | 70 | 66 | 441  | ATCTGTGCTCTGTTTTGGAGTGCAATAGGTGACAAAGATGAGAAGGTTTTGGAATG    | 5541 | A_95_P157472 FG180507     |
| 5932 | 70 | 67 | 614  | ATGGAAGCTATCCATTCCAAGCATGTTGATGCAAACCTACTCGCTGAGTTCATCCCTT  | 5543 | A_95_P089793 FG635833     |
| 5938 | 70 | 73 | 318  | TATGGCGAAATTTTTGTATGACTGCGGAGTAAGAGTGGAACTATGAGATGTAAAA     | 5554 | A_95_P085360 BP529260     |
| 5942 | 70 | 77 | 788  | TACAGACATCCTATTGCAGCCCATCGGGTTACGTATGAGCTACGAATATATCCTTGAC  | 5561 | A_95_P292418 FG137012     |
| 5943 | 70 | 78 | 259  | GTTACATGAGTGATTACTGACTTGTGATGGTAAATCGAGTTGGTTTTATTATGCGTCT  | 5563 | A_95_P094293 BP532644     |
| 5944 | 70 | 79 | 728  | CATGTGGTGAAGAATCCTGTTCCAGGTAGTTGATTTCTTTTTCTTTCTAACTTCG     | 5565 | A_95_P025861 EB445534     |
| 5947 | 70 | 82 | 1549 | GGTGGGCTTTTGCTAGTTTTGACATCCAAAGTTTTTGTATTTGAAGAATGATATCGA   | 5571 | A_95_P009001 TA13194_4097 |
| 5948 | 70 | 83 | 371  | AGTGCTTAACGTCAGGTTCCCTCCACATACATATGAAAAGTAAGCCAGCCGATTAGC   | 5573 | A_95_P044616 BP130928     |
| 5951 | 71 | 1  | 289  | TAACCAGCACTGGATTCTCTGATTTCCAAGGTGAATTATGCAGATTAAGTATTGACAT  | 5578 | A_95_P112122 CV020528     |
| 5956 | 71 | 6  | 626  | TGCTGAAAAAGAATTGGCAAAATGTAAGGTGGCCTGTACTTGAAGGGCACATGGGA    | 5588 | A_95_P114127 DV157707     |
| 5959 | 71 | 9  | 713  | TAAGGACCCCTCATGGGCTTTTGTAAATCATATGTAAGGATCCCTCGTGGGCTTTTGT  | 5594 | A_95_P116102 DV158670     |
| 5970 | 71 | 20 | 327  | GCTCTTTGATTGTGAATAAAATATGGTGTAAATATGTTAGTTGTCTTGTCCCGCATG   | 5615 | A_95_P040361 BP129804     |

|      |    |    |      |                                                            |      |                           |
|------|----|----|------|------------------------------------------------------------|------|---------------------------|
| 5974 | 71 | 24 | 252  | GAAGTGTGTAAGCTGTGTTGATTTGCTACGGAAAAATGCATCAGCATTCCAATTT    | 5623 | A_95_P094408 BP532702     |
| 5977 | 71 | 27 | 669  | AGGCATTTATGCTTCTGCATTTGCCTTCTTGAATTTGTTTTTGGACCCTATGAATTA  | 5629 | A_95_P181757 DV159293     |
| 5980 | 71 | 30 | 1901 | TATTAATTTGTAAGTATACTCAAATGCAATGGAAGTGTACTCTTATTTGCGGCC     | 5635 | A_95_P238269 AF316320     |
| 5987 | 71 | 37 | 204  | TTGAACCTCAAGGTAAACCAATTACAGAGTGAAGGGATGATGCTTCTTTCTTTGAG   | 5649 | A_95_P217527 TA20953_4097 |
| 5990 | 71 | 40 | 804  | CCTCTACGCCTTATGGCCAATGTTGTTCACTAATAAGTCACTGAGAGATTTATGTT   | 5655 | A_95_P185502 DV999374     |
| 5991 | 71 | 41 | 849  | AATGCAGACAACCTAGCTGCCAAGTTCAGTAGGGAAGTGTGATTACATAAATCTAC   | 5657 | A_95_P116247 DV158867     |
| 5992 | 71 | 42 | 541  | GTGCTAGCTATATATTGGTGGATGATGAACTTGGTGTGATGCTCATGTCATGCTTT   | 5659 | A_95_P099783 FS419329     |
| 5996 | 71 | 46 | 421  | CTGACACACTTGTAGAAATTTAGCAACATGGTCATTTCCAGATAGGAAGTAATGTCT  | 5667 | A_95_P061395 BP135249     |
| 6006 | 71 | 56 | 337  | GAGATGGGAAAGTTGGAAAACCTATTATTGAGCAGATGCTCATACTTTAGAAAGTA   | 5687 | A_95_P093733 BP532391     |
| 6011 | 71 | 61 | 1194 | GGCTTTCTGGTCTCGTGTCTTATTTTGACAGATTGATGATGATTATGATTTCCAG    | 5697 | A_95_P255399 TA14923_4097 |
| 6012 | 71 | 62 | 186  | GAATTGCACTATCCTAATCCTTGTGATGAAGTTCTTGTGATGATACCTGTATCTAT   | 5699 | A_95_P140247 EB444209     |
| 6021 | 71 | 71 | 395  | ACTCACTGTTGTGTCATGTGGAAAGCTCAAATTTAAAACAAGATCTTGTGCAACAT   | 5717 | A_95_P000996 FS417684     |
| 6025 | 71 | 75 | 422  | AAGGGATACAATTGCTGAAAAGCTTACTCCTCAGTTCATGTTCTTAAGATTTGTT    | 5725 | A_95_P030871 BP530551     |
| 6026 | 71 | 76 | 888  | ATATGAGAATAGACAGGTTAGTGGTACTCTTATTGTTGGCACTCATCTTGTATGACA  | 5727 | A_95_P020031 TA16858_4097 |
| 6030 | 71 | 80 | 1685 | TGATTGTATTTCTATGTCACTCTGAAGACTTTGTTGCTTCTTGTGGTGCCTTGATTT  | 5735 | A_95_P190067 TA14927_4097 |
| 6033 | 71 | 83 | 195  | CAAGTTTTACCTTTGTGTGATTTCCAGTTTCAGAAGAATGTACGTTTTACCTACAT   | 5741 | A_95_P144262 EB447413     |
| 6038 | 72 | 3  | 176  | GGGTCTCTAAGGTAATCCATATTTAGATGTATACCAAGTGAATTCCTTTGGTGTGAC  | 5583 | A_95_P154362 EG649550     |
| 6042 | 72 | 7  | 295  | CACCTAATGTAAGTCTTTGAGGTATATTGAAACTCTGATAGCCATTTTCGCTTTCT   | 5591 | A_95_P181347 TA12956_4097 |
| 6045 | 72 | 10 | 510  | AAGGACATTTTCAGTAATATGTAGACTTTGGACTTGATAAAAGCTCGCTTCTTTCA   | 5597 | A_95_P213722 EH623958     |
| 6054 | 72 | 19 | 847  | GTACATGAGCTTGATGCTTCAAAGTGAAGTTCCTGAATGAGTCATAGATCCCTC     | 5614 | A_95_P252204 FG174513     |
| 6059 | 72 | 24 | 365  | CCGAACCCCTTACCAGAAAATTACACTGTATATGTAAGGTAATAATCTATATTTATC  | 5624 | A_95_P006341 TA17902_4097 |
| 6062 | 72 | 27 | 834  | AACTCTCCAGGAAATGTACCATCCTTTGCAGGTCGCCAGATGGAGAGAAATTACT    | 5630 | A_95_P214752 TA20329_4097 |
| 6067 | 72 | 32 | 824  | TACAGACTTTGAGACATAGTCTTACCTCCTCAGCCAGTATCATCAGGAATGCAGCAT  | 5640 | A_95_P300788 FG156326     |
| 6071 | 72 | 36 | 657  | TTCTAAAGACATTATGAGGGCCATCTCTGTGTCAGGGAGGGGATAGAAATGTTATCT  | 5648 | A_95_P067555 BP136903     |
| 6074 | 72 | 39 | 602  | GATCACAATAATGTCACTTAGTCCAAGCCATAACGCAGTTGGATTTGGCCAATGGCA  | 5654 | A_95_P063900 BP135903     |
| 6076 | 72 | 41 | 910  | ATTTGACTTATGGTGGTATGGAAGTTCGAAAAGCGAGGAGTTAAATTGCCATATTT   | 5658 | A_95_P011391 TC40549      |
| 6077 | 72 | 42 | 916  | CCTTTTGAATAAAGATTTGGTCAAAAATTAGTCACACGACTCACTTTGTCTTTGCCTG | 5660 | A_95_P126227 EB425480     |
| 6078 | 72 | 43 | 200  | TTGGAAAAGTTCTCCATCCTCCTTATTCCCTAAGCCAAAACCAAATAAAGCAAAA    | 5662 | A_95_P173172 EH665546     |
| 6080 | 72 | 45 | 918  | TATGTCCAGTACTTGAGTCAAGTGTGATTGAGAATTCAGTTGGTTAATTGGAAAGT   | 5666 | A_95_P133702 TA15451_4097 |
| 6081 | 72 | 46 | 2164 | CTAGGCACAGATGTTTCTGTAATTGTGAAGTCTGTCAGATGGAAGCTTAAGTTTT    | 5668 | A_95_P217602 Z28374       |
| 6083 | 72 | 48 | 421  | GCACGTGGATCTACAGTCTACTTCTCAACTGGTATTGACTGTTCAATTAATTCGACT  | 5672 | A_95_P072010 BP525845     |
| 6086 | 72 | 51 | 931  | TTTTGGCAGAGCTGAAACTGTAATTACTGACTGTTGCACTGCGTTGAAGTGAGGAAG  | 5678 | A_95_P221287 TA21789_4097 |
| 6089 | 72 | 54 | 1915 | CAAATCAGCTGATATTCGATCCTTCCCCTTGGACCAGTTGTAATTCGCCGAACCAT   | 5684 | A_95_P119927 AJ305044     |
| 6105 | 72 | 70 | 486  | CAGGATTTATTTAATAAAAAGAAGCTCGGCTTTGTGACATTGTTGGGGTTTTTCGTA  | 5716 | A_95_P177677 TA12045_4097 |

|      |    |    |      |                                                              |      |                           |
|------|----|----|------|--------------------------------------------------------------|------|---------------------------|
| 6106 | 72 | 71 | 683  | GTTGTTGTTGTTGTTGTTATTGTTGTTGTTGTTTTGCTGCTGCACTATCAATGTAACC   | 5718 | A_95_P193932 TA15777_4097 |
| 6110 | 72 | 75 | 281  | AACCTCCGTGGTAAAGATTTTAATCTAACACTGCATTGGCACGTTATGCCAAAGACCC   | 5726 | A_95_P108837 TA17015_4097 |
| 6111 | 72 | 76 | 346  | ACAATATAGAAGGCTGGAAGCAAGGGTATATGCATATATGTTAGGCGTCGTTTTAAT    | 5728 | A_95_P094078 BP532552     |
| 6112 | 72 | 77 | 776  | AGAATTTATTACTCCTTCTTCGCTCGACTTCTGCATCGATGGTAACATGCCACCACCT   | 5730 | A_95_P290393 FG147498     |
| 6114 | 72 | 79 | 1265 | TTGGGTAAC TAAGCCCAATTTTTCTGGGCATTATAGACCTAATAATTCATTCAACTGA  | 5734 | A_95_P094333 TA15200_4097 |
| 6117 | 72 | 82 | 528  | TAATTTCCGATTGCTGGGCAAGAACCAGCATGAACGGCCTAGTTGTTGACGAAATCT    | 5740 | A_95_P100373 BP535341     |
| 6126 | 73 | 6  | 977  | CTTAGTACGAGGTGATTGTTTGTGGATTGAAATTTGGTGAGCTAATACTTTGTGAC     | 5757 | A_95_P293348 TC72930      |
| 6127 | 73 | 7  | 487  | GCTAGTCCGCCTTCTTGTTACGGAAGACTATATATGAGTGCTAAGTTTAATATTTT/    | 5759 | A_95_P139937 EB443875     |
| 6129 | 73 | 9  | 608  | CTCTAACAAAATGCACCTAAGATGTGGCCTAGTGGTCAATGAAGTGGGAAGAGATG     | 5763 | A_95_P069165 BP137310     |
| 6130 | 73 | 10 | 653  | GTTTTGGATGTGTTGGATATTTGGGAGTCTAAGTTTCTAATGTGAATTAGGTCTGT     | 5765 | A_95_P120682 EB437412     |
| 6133 | 73 | 13 | 708  | GGATTTGGTTTTGTTGTTGGACGTGGTTTGAACATTTCTGGTTAAGTGATTGTAATTTG  | 5771 | A_95_P195867 TA16212_4097 |
| 6134 | 73 | 14 | 361  | GTATTATCTGCCAGTCACTAGCTGCCCTATCAAGTTGTGAAGTCTTGTATCGTATG     | 5773 | A_95_P179157 FS416927     |
| 6135 | 73 | 15 | 0    | TTATTGTGTTTGTCCCTCCTTGCCCGTTGTAAGTTGTTGAATTACTTCAGGCCTGTGTT. | 5775 | A_95_P027551 A_95_P027551 |
| 6138 | 73 | 18 | 398  | CATGCCTCAGGAATCTTGATAGTTTCATAATTTGCATTTTCTCACCTGTGCTTTACCTC  | 5781 | A_95_P094873 FG621848     |
| 6141 | 73 | 21 | 511  | GGAAAGAACAAGTGAACACCAGGAGCTTTTTATTGAGTCTTGAATTTCTTGAGCC      | 5787 | A_95_P026001 BP128487     |
| 6144 | 73 | 24 | 725  | GTACTTATTTGTTGTAACCTCATGCTGAATCCAATCTTAAGAAGGAAATGGCTTCTC    | 5793 | A_95_P146032 EB449863     |
| 6153 | 73 | 33 | 504  | GGTCCAAAACAGAAGCTAAGTCAACCCTTCCAATTTTTCTAATAATCTATTTGAGGG    | 5811 | A_95_P093388 BP532238     |
| 6155 | 73 | 35 | 701  | TTCCACTTATTGCTCAAATCATACTCTCATCGTGAATAACAAGTTGTCCTTTGTAA     | 5815 | A_95_P204937 TA18172_4097 |
| 6157 | 73 | 37 | 831  | CCAAAGTTTATGTTGATTGCATTCTACGTTGATGCTCTAAAGAAAACAACATCATCC    | 5819 | A_95_P192717 EB438701     |
| 6159 | 73 | 39 | 220  | CTGGCGTAAATCAGCATATACTGATTTCTTTTCTCAATGTTCAATGTATTTCTGGATGC  | 5823 | A_95_P062135 BP135437     |
| 6172 | 73 | 52 | 2309 | GTAGTTTCTTATTGTAATTTGTAATGCTTTTCTCCAAGATGTGGGATGAGTTGTTT     | 5849 | A_95_P179782 TA12583_4097 |
| 6173 | 73 | 53 | 747  | GTGAGGAAAGCTTTAGCAACTCTGTACAGAATTCCTGTGAATTCGCAAATCTGATTC    | 5851 | A_95_P152917 EB683245     |
| 6175 | 73 | 55 | 1101 | GGGGAGCCGATGATATTTCCCAACTTGTCTAACAAATGTAAGAATCTTGAGCTAAA     | 5855 | A_95_P226179 EB643439     |
| 6179 | 73 | 59 | 836  | TGCATACATGTTAATCTTACGGTTCACGGTAGTCCTTACATGTCTTTAATACTCAATGC  | 5863 | A_95_P269406 EB424686     |
| 6180 | 73 | 60 | 808  | GCTATTTGCACTCAAAAAAGATTGTACATCGTGATGTGAAAGCTGAAAACATGTTGT    | 5865 | A_95_P151087 TA15718_4097 |
| 6184 | 73 | 64 | 596  | CAGTTTAGACGTCTTCATAGCAAGAAGCTCCAGCATACATTCCGGTTCTACTCTACC    | 5872 | A_95_P304618 FG198773     |
| 6187 | 73 | 67 | 786  | GACGGAAGTAACTATGAAAATGGAGCAAGCAACAATTAGTAATCATTGTTAGGATG     | 5878 | A_95_P139332 EB443070     |
| 6188 | 73 | 68 | 831  | TATTTAACAGCAGAGGAACAGGCCAACTAAGAGAGAACAACCCGGGGAACCTTGCT     | 5880 | A_95_P121027 EB680105     |
| 6198 | 73 | 78 | 1373 | TTGGACTGTAAGTTTAGGGTATAAGTGGGTTTCAATTTCTCCTTTTCTTGATGTATG    | 5899 | A_95_P130217 TA12917_4097 |
| 6199 | 73 | 79 | 483  | TCCAATGGCATCTTGACGATCAAAATGAAATGTAACACTTCTACTTGTATGTGCAAT    | 5901 | A_95_P105102 CV017298     |
| 6200 | 73 | 80 | 612  | GTGGATGTATAATTTGCATAAGTTCTGTAATTTGTACGAGCATTTTGAACGCGATAG    | 5903 | A_95_P140282 EB444245     |
| 6202 | 73 | 82 | 808  | GTACGGAGGTGTAATAGTTATTGTTGGAAAACCTTGTATTGTGTTTGGTTTTGAGT     | 5907 | A_95_P178197 DW003366     |
| 6203 | 73 | 83 | 629  | ATTTTAGATTTAGGGTGTGTTTGGAAAGCACTGTGTAATTAAGGCAGTGTAAAGA      | 5909 | A_95_P308793 FG643622     |
| 6207 | 74 | 2  | 707  | CTTAGCATTGCCAGCCCTTCCATGTAAGACATTATAAAAAATCAGCTTACTGAAAATA   | 5750 | A_95_P208682 TA19021_4097 |

|      |    |    |      |                                                             |      |                           |
|------|----|----|------|-------------------------------------------------------------|------|---------------------------|
| 6208 | 74 | 3  | 162  | AAGGAACTCTACAAGGAAGCTCAGGATCATCGAAGTCCACAGAATCTAACACAAAA    | 5752 | A_95_P046746 BP131476     |
| 6211 | 74 | 6  | 617  | TTTCTGATTTGGATTGAGTGCTCTATCCCAGCGAGTCAGGGACGATGGCTTACTACA   | 5758 | A_95_P129262 EB428964     |
| 6212 | 74 | 7  | 1024 | CTCATGTTGCGCTCACATATTAGAGATCTTTTCTGTAGTGAAATGTCATCAGTTATAG/ | 5760 | A_95_P208357 TA18951_4097 |
| 6219 | 74 | 14 | 1738 | ACACATCTAGCATAACCTTTTTAAGTCGCTTTCAGCACTGTTGGTTCTCTTTAATCTCI | 5774 | A_95_P007431 AY553214     |
| 6227 | 74 | 22 | 1070 | TTTTGGTTGATCCAAGCACCGTCTTTATGGATAGTTGTGCATTTACCTTGCCTTAAAA/ | 5790 | A_95_P249887 AB010878     |
| 6228 | 74 | 23 | 582  | GATGAAGGTTATAAGTTACAGACCAGTCAGTCGATCATGTTTCGAACGTATCAATAG   | 5792 | A_95_P272266 EB448670     |
| 6233 | 74 | 28 | 785  | GTGAATCAAGAATTCCATCTCCAGTAATATACTCCTGCTTCAGAAAAGGCAGTATTTT  | 5802 | A_95_P250877 DV160326     |
| 6234 | 74 | 29 | 452  | AATATTTGGATTGATCATGTGTCAATGTGGCGTTGTAGTGATGGGCTTATTGATGCTC  | 5804 | A_95_P283783 BP128327     |
| 6235 | 74 | 30 | 811  | GGTACAATCAAAGGCTGCTGCAACTGCATAGATCATATTTACCTAGTTGAGATCAG    | 5806 | A_95_P229599 DV159974     |
| 6241 | 74 | 36 | 670  | TAGCATTTTGTTCCTATCCTTGGCTCCTTACCTCCAAATGAAAAAGAGAGAAAAA     | 5818 | A_95_P255354 EH614582     |
| 6244 | 74 | 39 | 770  | GGGTCATAAGACATCGACCAAGGAGTAGTTCAAAGTATGAAGATACTTAATGTATTC   | 5824 | A_95_P222322 TA22008_4097 |
| 6249 | 74 | 44 | 561  | TCAGCTGGGATGAGATTTCTTTCTTCAACCTTACATCCACTATTTTCAGATGTTTGG   | 5834 | A_95_P135847 TA18995_4097 |
| 6251 | 74 | 46 | 555  | GTTGGCCCCAAATGGATTCTCGGTCATCAGTTTTTGTGTTTGTATGCTTAATTCTT    | 5838 | A_95_P314173 FG165774     |
| 6253 | 74 | 48 | 522  | GATATTGACCGGTTCTACAATTAATCAACTTCCAGATGGAGGAGACCAGTTGAAA     | 5842 | A_95_P138522 FG148973     |
| 6255 | 74 | 50 | 68   | CAGGCATTGCCCTCAGACTCTTCTTGGGTCTCCTGTTTTACTTTTGGTATTTATTTGT  | 5846 | A_95_P090563 BP531001     |
| 6265 | 74 | 60 | 1168 | CTTTTATCTTCTGAATGGAGAATAAACTATGGCCAGTGTGCCTTCTTGCTTATATTGA  | 5866 | A_95_P002591 AY619950     |
| 6267 | 74 | 62 | 851  | GCCGAGAAAACAGATTCATCCTCTCATTCTTGAAGAAGAACCAGTTAAAATAACTTA/  | 5869 | A_95_P247792 EB449524     |
| 6272 | 74 | 67 | 1504 | TGCTTCAGATCTTTTGAATTGTAGTTTCTATGTTCTGTGTAAGCATTTCATCTCC     | 5879 | A_95_P211722 TA19676_4097 |
| 6273 | 74 | 68 | 419  | GATTCTGTGGAGATTTGTTCTGGAATCCCAAAATCTTGATCCACAGGTACCTGA      | 5881 | A_95_P088203 BP529986     |
| 6274 | 74 | 69 | 229  | GGATATATATAAATGGTACACCGAAGTGATACTCAATCAGATCGATTCAAACCTTC    | 5883 | A_95_P131742 EB432138     |
| 6276 | 74 | 71 | 1048 | TTGATACATAGAACGATAGTTGCTGGACTATTAATTCCTGTGCAAGTCTGGTATTTG   | 5887 | A_95_P016846 TA16826_4097 |
| 6277 | 74 | 72 | 435  | AAGAGTGGGCAGTCTCAACATAGGGAAAGCATACAATTTTTCTGATGTTCTTGAAA    | 5889 | A_95_P089818 BP530665     |
| 6279 | 74 | 74 | 883  | ATTAAATTGGCAATTCTGCACCCTCCACATTTCTGTCTTTACGCTCAATGAATGCGAC  | 5892 | A_95_P011626 TA14282_4097 |
| 6280 | 74 | 75 | 309  | GGATATTGTAGAGGATTGTCTTCAGATTTGAAAGTTGGTTTAGTTTCTGTTTCTCAT   | 5894 | A_95_P089223 BP530412     |
| 6283 | 74 | 78 | 569  | GTTTTGTGTTATGTTTCCGGTGGATTCTTTTCCCCTGATTCTTTTAGCATTCTTGTTGC | 5900 | A_95_P018141 BP533405     |
| 6284 | 74 | 79 | 793  | ACGGAATAGCTGTGATAACATTAGTGTGATTGTGGTTGATCTGAAGAGAAGTCATAC   | 5902 | A_95_P148077 EB677259     |
| 6285 | 74 | 80 | 1178 | GAAAATTCTGATCCACCGTGATGGTGACAATGGGAAACAGCTTATATATGAAAACT    | 5904 | A_95_P015456 TA18679_4097 |
| 6288 | 74 | 83 | 421  | GACTGTGAGGGCTCTAGTTCAGTTTGTACTCGATGCATTATGTTTCATATATTATGTAA | 5910 | A_95_P293648 FG636961     |
| 6289 | 74 | 84 | 87   | CACTGTATTGTGCCCTCTCTGTTTTCATTTGCTTTATGTATTAATGATTGAAAGATCCA | 5912 | A_95_P003341 FG638896     |
| 6292 | 75 | 2  | 342  | AGATTTGTTTTTGCATTGACCCAACCTTGATTCTGCAGCTGACCCGGTTAAGTGTC    | 5917 | A_95_P158642 EH616541     |
| 6301 | 75 | 11 | 479  | TCTGATGTCTGCCGCTTTTTCACTAGCAACCAATCCTTTCTGCATGGAGATGTATGA   | 5935 | A_95_P277763 AM818948     |
| 6303 | 75 | 13 | 757  | TAGTGATAAGTGATTATCCTTCAACTATAGAGAGCTGGAATAATGATAGCGTGGAA    | 5939 | A_95_P243932 EB682084     |
| 6305 | 75 | 15 | 516  | AATATTTGTTCAAGTCGATCTAAGTTTGGCTCCAAAATGTACCATCTCGAGGTGGCTC  | 5943 | A_95_P117462 TA12494_4097 |
| 6330 | 75 | 40 | 276  | CAAACCACCGCCGACCTCGAAAAAATCGAAAAAATCTTGAAGACGAAGCAGTGTA     | 5992 | A_95_P104392 DV999016     |

|      |    |    |     |                                                              |      |                           |
|------|----|----|-----|--------------------------------------------------------------|------|---------------------------|
| 6332 | 75 | 42 | 859 | CATGCATTGTCTTTTTCGATGAAGTAGACGCTATTGGAGGTGCAAGATTTGATGATG(   | 5996 | A_95_P225372 EB444342     |
| 6338 | 75 | 48 | 383 | GAGCATTTAGAAACACATTGCTTTTTTGACCCCGCTTACATTAATATGAACCATTTTCC  | 6008 | A_95_P023431 TA14313_4097 |
| 6340 | 75 | 50 | 266 | TGTTTCAATAGCGTTCCCGGATTTATGTGCTAGAGATGATGCCAAAGAGGTCGCGAA    | 6012 | A_95_P064340 BP136022     |
| 6343 | 75 | 53 | 541 | ATCTTTTGCCTTTATTTTCTGGCGACCTAACAGAAAGCTTTAAATTCCAGCGGCCCC    | 6018 | A_95_P162972 EH621959     |
| 6357 | 75 | 67 | 573 | GTGGTTCATTTACCGCGGTAAAATATTGATTGAACACATAATTATGCGAAATGGATC(   | 6046 | A_95_P181042 TA12886_4097 |
| 6358 | 75 | 68 | 782 | AGCTTGTGTGGTTCCTGCAGATTTGAAGGAAGAGTGATTATGAAATTGAAAATCTAG    | 6048 | A_95_P230584 EB439439     |
| 6359 | 75 | 69 | 686 | GACACGCTACTTTGTTATGACTAAGACAATGATAATCTTAACGTGTAACCTGTAACAT   | 6050 | A_95_P200012 TA17118_4097 |
| 6367 | 75 | 77 | 155 | TGATGAGTACTTGGATTCTTTGGACCCGATTTGGCTGAGTACCCTGCCAGGTAATAT    | 6066 | A_95_P058156 BP134405     |
| 6368 | 75 | 78 | 468 | GCTGATGCATGTTGCAAACCTCAAAAACCTAAATGTATCACATTAGCAGAATAATA/    | 6068 | A_95_P039601 BP129594     |
| 6376 | 76 | 1  | 165 | ATACTTGGAGCGACTGTAATGATCTCAACTGACTTTGGCCATGGGTTTGTGGACATT(   | 5916 | A_95_P069715 BP137463     |
| 6377 | 76 | 2  | 856 | TTTATTGTTGTGGTAGTTGGTGGAACTCACTTCTGTGTGTATGACATCAAGTTCACCG   | 5918 | A_95_P003356 DW001848     |
| 6378 | 76 | 3  | 729 | TTAGCCTACAGGGAGGGGAGGAGAAGTACAGGAAGGCATGGACACAAATTTGTGA/     | 5920 | A_95_P150037 EB680099     |
| 6380 | 76 | 5  | 847 | GGATTATGTGTACATATCACGTCATCTGTACATGCCATGTACTTCTCTTCTTATGTAC   | 5924 | A_95_P288138 FG163834     |
| 6382 | 76 | 7  | 584 | AGAAAAGAGTAGAACAAAAGGCTCCAGGTCAGTGCAGGTGGGGTCTTCACTTTGAAA'   | 5928 | A_95_P316393 FG188416     |
| 6387 | 76 | 12 | 853 | TGTTATGTGAAGGAATGATAAGTAGACGCTGAGAGGCAAATCAATGATAAGTAATT(    | 5938 | A_95_P245437 DV999956     |
| 6391 | 76 | 16 | 793 | GAGCCCTATTTATCTGGGAAGCATTTTAGAAGGACTTCTCATTATAGCTGGGCTTTAT   | 5946 | A_95_P158877 EH616771     |
| 6392 | 76 | 17 | 898 | CTATATAGAGACATGTTTGGAGAATTGCTTTTTGTTACATCGACAATCGTACTGCTTG,  | 5948 | A_95_P258586 DV157767     |
| 6394 | 76 | 19 | 121 | TGTGAGTTCGATTTTTACTGTCCCCATTCCCTGATCCTCCAATGTAATAGAGAAAAGG'  | 5951 | A_95_P098148 BP534341     |
| 6398 | 76 | 23 | 170 | GCATAAGATGATGATTTCCATAATTGACAGTGTATTTGCTTAGGTGAGTTCGTGTA/    | 5959 | A_95_P109627 CV019388     |
| 6401 | 76 | 26 | 177 | GATTCTGCTTTGTTCAAATTTTAGCATTGAAAAGCGTGGCTTTTTGCTATCGCGCC/    | 5965 | A_95_P095008 BP532976     |
| 6402 | 76 | 27 | 446 | ATCAAACCTCATTTGATAGGCATTCCAGTCAAACCAAGCTTGAATACAAAATTCGCTT(  | 5967 | A_95_P074345 BP526445     |
| 6409 | 76 | 34 | 834 | ATAGTCAGGTCCTAGTTTCCGGATCAAATTTTGTGAGTGTTATCATTGCGGTTTTGG'   | 5981 | A_95_P191647 TA15281_4097 |
| 6411 | 76 | 36 | 352 | TTGTTAATCTTTTTGCAGGTTCTTTCCTCAAGTGAAGTTGGATGATTCGTTTGTACTT(  | 5985 | A_95_P131972 EB432401     |
| 6412 | 76 | 37 | 600 | TTACTTTCAGTTGCTCAAAGGCTACCAAGTTAGTTCTGATCCCAGAGAGTCCAGAT     | 5987 | A_95_P164932 EH624415     |
| 6413 | 76 | 38 | 429 | CCTAGATTCAAGAGCTTTTGTTCCTATGCTGTGTTAATTACATTTTGATCAGGAGAT    | 5989 | A_95_P003491 EB102901     |
| 6417 | 76 | 42 | 643 | TGATTCCCGTACTTCTGGAAGGTTTCTGATTTCAATCTGAGTTGGCTTTGTCTTTGCAT  | 5997 | A_95_P162472 EH621421     |
| 6426 | 76 | 51 | 571 | TGAGTGATAATGCAAATGATTTCTCAGATAGGCAAAGCAGCTGATGCTTGAATACTTG   | 6015 | A_95_P135627 DV999569     |
| 6430 | 76 | 55 | 746 | TTCATGCTTTAGTGGATTTGGTCACTGATGAATAAAGATGAGGAAACTTTGGTCAAT(   | 6023 | A_95_P146402 EB450438     |
| 6432 | 76 | 57 | 474 | CTTCCTTTATATTGCACAAATTAGGCCAGGCCTAATCTTTTTATCACTCGAATAACG    | 6027 | A_95_P152882 EB683210     |
| 6435 | 76 | 60 | 484 | GTACTTTCAAGTTCCTATTTTTTACATGCTTGCTAGAAGATGAGGCTTTTTCAATGCCT  | 6033 | A_95_P090903 BP531135     |
| 6440 | 76 | 65 | 780 | TTTTGTAACACTTCACCCTACACTGTTGTAGAGACTATGCCTTGGCGAAGGCTCTTG'   | 6043 | A_95_P125787 EB424886     |
| 6442 | 76 | 67 | 713 | TATTGTGGGGTATTGGAACAGCTCTTGGAGAGCTTCTCCTTATTTTCTCTAGAGC      | 6047 | A_95_P145062 EB448605     |
| 6445 | 76 | 70 | 731 | GCAGAAACTTCTTAGAACAGCTCAATTTGAGCGCTGGATAATATGTTATACCAGTAT/   | 6053 | A_95_P012916 DV157680     |
| 6454 | 76 | 79 | 496 | GTATCAGGTCCTGCCTTGATTCGAGTTAATTTTTTGTGCTGCTCTATACTTATTTCGAA, | 6071 | A_95_P288643 FG639219     |

|      |    |    |      |                                                              |      |                           |
|------|----|----|------|--------------------------------------------------------------|------|---------------------------|
| 6455 | 76 | 80 | 944  | GAAAATGAAGAATGGTTATCGTATTCTGCTGAGCTCTGTGGTGGAAACACACATTTCT/  | 6073 | A_95_P187072 TA14266_4097 |
| 6458 | 76 | 83 | 320  | GGGTGTTCTCTTGATTGGATTTTTCCATGTCTCGTGTCTTAAACAGTTGAGATTTTTA   | 6078 | A_95_P194447 TA15898_4097 |
| 6459 | 76 | 84 | 826  | TTGGAAGCTTTCTTCTTGACAACCTTTGCTTTCTCCAGTTTAGATGACTAGATATTCTT  | 6080 | A_95_P301368 FG161210     |
| 6460 | 76 | 85 | 852  | TTTCTGTCTCTGCTACCAGAAGATAAGATGCGCGAACTCATGCAGACTCCTGTTCTTG   | 6082 | A_95_P301608 FG167602     |
| 6462 | 77 | 2  | 383  | GATTATCCTGAACCTATTCTCTTTTCAACGCTGACTTGTCTTGCAAAGGATTTCTGTGT  | 6085 | A_95_P024946 BP131725     |
| 6463 | 77 | 3  | 810  | GGGTGAAGTTTACTGAGGTTTAACTGCTTGGCTGCTAGTACTTGTGACCTGTTGTCA    | 6087 | A_95_P221692 TA21874_4097 |
| 6467 | 77 | 7  | 422  | GTTGTTGATCAGTGTTTTACTGCTATGAAATTGCTGGCTAATGCTCGACTAAGTTAAC   | 6094 | A_95_P195837 TA16205_4097 |
| 6470 | 77 | 10 | 757  | GCTTCTCAAGGAGGGGTTGTTGTAGTTAAAAATGGACATTTACTATTCTAACTTATC    | 6100 | A_95_P160362 EB449711     |
| 6483 | 77 | 23 | 958  | CAGCAAGCGGATTGATGTATTTGGAGAAGTAATCAGAGAAATCTGTGAGTTTATG      | 6124 | A_95_P016581 TA12014_4097 |
| 6484 | 77 | 24 | 169  | GAAAATGTGACAACCTGAGCCTGAAAAGTTGGAGAATACAGCTCATTATCACTTTAA    | 6126 | A_95_P133592 EB435224     |
| 6488 | 77 | 28 | 456  | CCCTAATGTTTAGGATTTATGGTACACCTCTCATTTGTCTTTTGTATCTTCTTAAGGC/  | 6134 | A_95_P220447 FS393498     |
| 6503 | 77 | 43 | 1205 | ACTGGTTTTCCACCTGTATGGTGTGTGATAAATCTTTATTTCTCTGGGAGTTGTTTCAA  | 6164 | A_95_P009756 TA13127_4097 |
| 6508 | 77 | 48 | 1888 | CAGTTTTGAAGTTTTCTGCCTTCTGTTAATGGTTGTACAAAATAATGATGTTAGAT/    | 6174 | A_95_P032826 AF149981     |
| 6513 | 77 | 53 | 828  | TGTTAAACCAGGGCAAACACTAGTGATCCTAGAAAGTGGTTTTGCTACTGTTGAGAAGGC | 6184 | A_95_P030376 TA15846_4097 |
| 6514 | 77 | 54 | 719  | CGGCTGTGTTTTCTACTCTATGTTTTCGAAATGTCTTTGCTTCAAATGTGTGAAAACCTC | 6186 | A_95_P011661 TA11894_4097 |
| 6516 | 77 | 56 | 628  | AATAATTCCAGTTGAAGAGATGCTATTCAGTTTTGGGTGTAGACATTTGTACAAGGA/   | 6190 | A_95_P121517 DW001600     |
| 6517 | 77 | 57 | 334  | CTTGACGGATTGATTAAGTGAGAATTTTTCGTGATAGTATTGATACTGGTCAAGGTTI   | 6192 | A_95_P129632 EB429597     |
| 6522 | 77 | 62 | 508  | ACAGTTAAGAAGTATGCCGATAATCTTCTGCATGCAATGGAGGGAGTTAGTGCTCGC    | 6201 | A_95_P127722 EB427299     |
| 6526 | 77 | 66 | 1062 | CAAGAAATACCAAGAGGAGTGATCATGTAATGGATTGTGGCTCGTGATGGACCAA      | 6209 | A_95_P204717 AB193040     |
| 6530 | 77 | 70 | 192  | ATCCAATTAGGAATTTGTTTCTTTGAATTCTATCAGGGTCCATTAGCTTGTATCGCC    | 6216 | A_95_P080625 BP528049     |
| 6533 | 77 | 73 | 880  | CAACAAGTGATGAGACACAGAAACAAGAAATTTCTCAAGAAATTTATGGCAGAGCAT/   | 6222 | A_95_P025086 TA17479_4097 |
| 6534 | 77 | 74 | 783  | GCCACTGGATTTCTGTCCACCTGATCCAAATCTTTCTTCGTCATGTTGGTGACTCA     | 6224 | A_95_P011252 AB125233     |
| 6537 | 77 | 77 | 587  | CCTGAGTTGTTAGAGGATTCGCTTGAGAATTACCCCGAAGAGTTTTCATTTCTGATG    | 6230 | A_95_P136457 EB440221     |
| 6540 | 77 | 80 | 343  | ATCTTCATGTAGGTTTTACGAGCTTACAAGTATGGCATTGCTTCTGAGGGGATAT      | 6236 | A_95_P096438 BP533623     |
| 6542 | 77 | 82 | 461  | CTGAAAAACGTGCTGCAGCAGTGAAGGCTTCAGGAAGAAGAAGAACCCGTAGTATC     | 6240 | A_95_P108612 CV018923     |
| 6553 | 78 | 8  | 841  | ACTTGAGAGGAACCTGTTGCCATCTTCACTGAGGGATTTACATACATGAACACACTTC   | 6097 | A_95_P292403 EB427333     |
| 6554 | 78 | 9  | 424  | CAGCGCATCATCAAAGATATATAGCTTAAAGAACTCCGAAGTTTCTCTAAGTTGC      | 6099 | A_95_P064715 BP136129     |
| 6559 | 78 | 14 | 1038 | TGTGGTAATATGTTGATATTTTGAATCAATCGATTTGATTTCTTTTCTCGTGGAAGC    | 6109 | A_95_P192382 TA15439_4097 |
| 6564 | 78 | 19 | 631  | AACAAGGATGCAGCATATGCCTGATAGTGTGACCATTGGTCAGCAATATGACAGAA/    | 6118 | A_95_P136742 FG160232     |
| 6565 | 78 | 20 | 422  | ACATGGTCTACAATTGATCGAGCTGCTTTTATTTGTGCTTCTTGAGAAAGGAAAACA    | 6119 | A_95_P096488 BP533648     |
| 6566 | 78 | 21 | 849  | GTGTTGGACCGCGAAACCAATAAAATGGAAGTTATTTTCTGTGCAATTAGAACCTAT/   | 6121 | A_95_P011096 EB680130     |
| 6571 | 78 | 26 | 394  | CTCCCAAATCCACCAAAAAGAAAAAATATTTCTGCTCAATTGAAAGGGTGTTCCTCAA   | 6131 | A_95_P204702 TA18120_4097 |
| 6574 | 78 | 29 | 552  | ATCTGTCCTCTACTTTCCATCCAGAAAAGTGAAAATAGCATTGAGCAATGCCTGTGA    | 6137 | A_95_P103442 CV016502     |
| 6577 | 78 | 32 | 388  | GCGTGGAATGGATCTTGACAAAACCTGATTTTGGCTGATCTATCCACATTAAGGAGA    | 6143 | A_95_P063185 BP135708     |



|      |    |    |      |                                                             |      |                           |
|------|----|----|------|-------------------------------------------------------------|------|---------------------------|
| 6582 | 78 | 37 | 1008 | ATAAAGCGTGTGCTGAAGTAAAAGCCGCTTTAGGCTGCAGATCCTTTACTTGAAG.    | 6153 | A_95_P202522 TA17654_4097 |
| 6586 | 78 | 41 | 866  | CAGCTGCAAAATTTAAGCTTGTGATCCTTGGATATTTAAGTTCACCAGTGTATTTGTT( | 6161 | A_95_P226244 DV158744     |
| 6588 | 78 | 43 | 461  | CTGTTTGTGTTAGTGGTCAGTTAATCTAGGGTATTTAATTTCTGTTGTTAAGGTCTC   | 6165 | A_95_P000736 FG635626     |
| 6589 | 78 | 44 | 1215 | TTGTGATTAAGTATGACCTTCTACTCAGCCAGAGAACTACCTGCATCGTATCGGTCTG  | 6167 | A_95_P152712 X79141       |
| 6592 | 78 | 47 | 798  | GTTGCTCAACTACGAATGGTCTATGTACATATGATTTCTGTATTATCCAAGTGCAGTC  | 6173 | A_95_P137897 DW002580     |
| 6593 | 78 | 48 | 913  | AAATTGACTTACCCTTGTCCATGGTAATGTGTCTAATGCAATCACTTCAATTTCTCCT  | 6175 | A_95_P014616 TA15703_4097 |
| 6594 | 78 | 49 | 172  | ATTAAGGAAAAGACCAAGAAATCCATAGCCCTATCAACGCCCTTTACGTTAGC/      | 6177 | A_95_P131547 EB431869     |
| 6595 | 78 | 50 | 314  | ATGTAACATCGAGGTACAGCTGATAACTTGCAGAATATTTATCTAAGCATAGATGA    | 6179 | A_95_P019461 EB447384     |
| 6599 | 78 | 54 | 1083 | CTAGTTGACTTGCCATGGAACCCCATGAAATTTTTGGTGTGCTATGAGTATATAAAA   | 6187 | A_95_P214822 TA20347_4097 |
| 6602 | 78 | 57 | 627  | AAAGGAAAACCTTGCAATTTTGGGATCTTTACACAAATAGCCGGCGATATTCATTGTTT | 6193 | A_95_P287268 FG635982     |
| 6605 | 78 | 60 | 600  | TCGGAGATGCAAACTTACTGGTAGAGAGATGCAAGTCTTCAGTCAATCTAGCCAA     | 6198 | A_95_P061270 BP135218     |
| 6606 | 78 | 61 | 544  | GCTTTTATGAACGAGAATGTGATGGAGTTCAGATTCAAGAGAGAAGATTACTTCACT   | 6200 | A_95_P060680 BP135059     |
| 6611 | 78 | 66 | 969  | ATTGATCATGTCTCTATGAGGAAATGCTATGATGGAATCATAGACGCTGTGGAAGGA   | 6210 | A_95_P010171 TC59215      |
| 6612 | 78 | 67 | 779  | CCTTGATAACTAATGGAAGTCCAGATATTGTCAAACCATCAGCAGGCTCAAGAAGC    | 6211 | A_95_P126432 EB425758     |
| 6616 | 78 | 71 | 314  | ACTCCAATCTTCTTTGAATATCTTGTCTCAGGCATGTCTGAAGTTTATTTAAGCTT    | 6219 | A_95_P109767 CV019440     |
| 6619 | 78 | 74 | 759  | TTGGAGAAGTCAAGCAGTCTTAGCTGTTATACAAAGAATCGTGAATCAACCTCA      | 6225 | A_95_P253564 DV159957     |
| 6622 | 78 | 77 | 194  | GTAATTTGGTTCATACTTCAGCCTCTTGAACAAATGAAGAGAAGTCCCTTTCTCCTCC  | 6231 | A_95_P119982 DV999616     |
| 6631 | 79 | 1  | 1375 | GTAGGGGTTGATTGTATCCCAAATCTTAGTACTGTCTGGATGAAAATTTATGAGGA    | 6248 | A_95_P002691 TA13816_4097 |
| 6632 | 79 | 2  | 483  | TCATCCTGAAGTTTTCTCTGTGTCTGTAACACGCAATGTTCAAGAATCAATATCAT    | 6250 | A_95_P136357 FG644307     |
| 6633 | 79 | 3  | 773  | ACATCCACCACAGATCAAAGCTTACAGAGCGATCAATAATTGATTTTCCATATACC    | 6252 | A_95_P197012 TA16469_4097 |
| 6641 | 79 | 11 | 641  | CTGCTATTGCACATGTACAGTTCCTTGAAAATAAATAAAGCATTGCTCTGGGTTTGT   | 6268 | A_95_P188302 EB433758     |
| 6643 | 79 | 13 | 1724 | CTCTGCCTGAACAAACTATGTTTGAAGAGAATGTAAGCTTGACTTCTTTGAATTA     | 6272 | A_95_P007441 AB075948     |
| 6644 | 79 | 14 | 800  | AATGTGATCCACTATTTAGACTGATGGGATCTTCACCCATCTAGCTACATGGTGCAC   | 6274 | A_95_P269766 FG159209     |
| 6646 | 79 | 16 | 801  | ACTTGTACGTAAGTGAAGAAAGTAACTTTGACAAATACAAGGTTTGCCTGGAGTGA    | 6278 | A_95_P253684 DV162053     |
| 6649 | 79 | 19 | 1145 | TATGCTGTGTTGAATGAGCAGAAAAGAGGTGAGGAATCCTCTTTTAACTCTTGACTC   | 6284 | A_95_P209852 TA19277_4097 |
| 6650 | 79 | 20 | 605  | CGGGACAATATTCGGGTTTTACCCGTATAGTTTGTGAAACATTGTTGGAACGCTTTGT  | 6286 | A_95_P128912 AB488495     |
| 6651 | 79 | 21 | 538  | GGGCAGCTGGTTTGTGATTTGTCTTGTGTATCATATAGTCTGTCATATACGAAAAT    | 6288 | A_95_P116532 DV159290     |
| 6653 | 79 | 23 | 915  | ATGTATACATGAAACATACTCCATGATGCTTGGGTCATAACACTTTGATGCTCATTCT  | 6292 | A_95_P192287 TA15418_4097 |
| 6658 | 79 | 28 | 367  | TCAATTTTATTTGTTTTCAGATTTGGAGCATCCAGAGGCCGATTTCGAGAGGCAAAGA  | 6301 | A_95_P094263 BP532630     |
| 6659 | 79 | 29 | 468  | AAGGTGTTGGAACGGTGTCTCTCTAATATTTTCTCTCACAACTTCTATAGTAT       | 6303 | A_95_P036368 BP128714     |
| 6660 | 79 | 30 | 379  | ATTTAGCAAATTCAGTTCAGCACCAAGCTCGTGTGAGGTTGATAAGCATTGGCA/     | 6305 | A_95_P067760 BP136958     |
| 6661 | 79 | 31 | 603  | CTCTACTGCACTTGGCTGCATCAATTTGTATGTTGGGATTATATTATAGTTTTGATTCT | 6307 | A_95_P223832 EH615961     |
| 6662 | 79 | 32 | 497  | TCTGTAGAGCTTATGACTTGTACTACCAGTTTGGGATTGAAATTTGTATCGAGATTT   | 6309 | A_95_P079450 BP527768     |
| 6663 | 79 | 33 | 284  | TTTGCTTGGTAGATATCCAGAAGTAGGGCTAGCCAACGCTGTGCCTTGAGATGTTCT   | 6311 | A_95_P125522 EB102909     |

|      |    |    |      |                                                             |      |                           |
|------|----|----|------|-------------------------------------------------------------|------|---------------------------|
| 6664 | 79 | 34 | 580  | TTGGGAAATATCCTATTCCTTAAGCCTGACCAGGTGGTGAAAGCCATGAAAGGGCCT   | 6313 | A_95_P126367 EB425709     |
| 6667 | 79 | 37 | 627  | TTGTTCAACATAGAAGATTGTACCTTGTTTCTTCTGGAGGGTACAAAGTTCCAGCTA   | 6319 | A_95_P183737 TA13525_4097 |
| 6670 | 79 | 40 | 328  | GACCTTTGAATAATTGCTTACTGTTTCTTGGTTATCTGGAAATTGTTGGGGAATAC/   | 6324 | A_95_P093623 BP532339     |
| 6673 | 79 | 43 | 608  | CTTTTCTTACTTGTGGGGCAGGTGGTTGACTGTGCGATATGCGGAAATCCCAATTTCT  | 6330 | A_95_P163987 EH623041     |
| 6676 | 79 | 46 | 108  | GGTCTTGGTTTGTACCTATGTATTTAATCGTAATATTGTTGCCACTGTGAACTGT     | 6336 | A_95_P152217 EB682535     |
| 6678 | 79 | 48 | 429  | TGACACTTTCTCCATTATGCGTGTATCCAGTTTTCTTTCTAAAAGTTCAAGA        | 6340 | A_95_P020691 TA12997_4097 |
| 6680 | 79 | 50 | 869  | CGCGCTTGATCAACTTGATCTGTAGAAACTTAATTAATCTGCAGCAAATTACGTG     | 6344 | A_95_P229414 DV159857     |
| 6685 | 79 | 55 | 687  | GGATCTTTGAATAGGGACAATGGTTCCCTGCTCGATATTGTGCCAAGAATCGGATG    | 6354 | A_95_P162292 EH621249     |
| 6686 | 79 | 56 | 1180 | GATGTCCTCTTGGCTGATGTTGTGGACTTTTCTTATTAATCAAAGCTTTTTCTCTC    | 6356 | A_95_P217837 D86722       |
| 6689 | 79 | 59 | 876  | CACAGAAGCTTACATCACAGAGACAGATGCAATTATCAAAGTTGTATAAACATTATG   | 6362 | A_95_P116497 TA17798_4097 |
| 6690 | 79 | 60 | 844  | TGATAGGTGGTTGACAAGGCCTTCAAGGGTAGATTGTGCCTGGATAATTTTGTTG     | 6364 | A_95_P017746 EB449268     |
| 6692 | 79 | 62 | 622  | TTCATTATTGATGAATTGCACCTGATTGGTGGTCAAGGTGGCCCAATCCTGGAGGTG   | 6368 | A_95_P037318 BP128972     |
| 6698 | 79 | 68 | 225  | GTTTAGTTCTCATCGAAGGGTTTGATTGTTTCAGACGATGAAAAGTACATATCTTGT   | 6380 | A_95_P034399 AJ718674     |
| 6700 | 79 | 70 | 347  | CATATTAATATATGTTCTCTTCCATTTTATCGTCCTTGGCTTCTACTGTGCCGAGTGT  | 6384 | A_95_P081290 BP528217     |
| 6704 | 79 | 74 | 853  | TAGACAGTACGCAAAGCTGTTACTCGCTATAGCCCATCTGGTGTGACTCATTTTTCTG  | 6392 | A_95_P227429 FG161617     |
| 6705 | 79 | 75 | 842  | TACAAACATTCTGTTCTCATCTGGCACAACAGGAGAGCCAAAGGCAATTCATGGAG    | 6394 | A_95_P205377 DV162298     |
| 6708 | 79 | 78 | 806  | ATTGAGAAGACGCATTTACTTAGCCTGGGATAATGCTTGTATCACCTTCTATCTTG    | 6400 | A_95_P159017 EH616951     |
| 6713 | 79 | 83 | 586  | TTTTTCGAGAATTTGGATGCCCTGATTATCAAATGCCTTTGTGAAACGCTTTCTTCC   | 6410 | A_95_P019586 DW003011     |
| 6714 | 79 | 84 | 182  | GGTCGTCTTCTCAGTCTATTGACAGAATATTCATATCAAAGTTTCAATTTCTAATTT   | 6412 | A_95_P034588 AJ719184     |
| 6715 | 79 | 85 | 873  | TCTTCAGCACTGCCCTGAGGGTTTTGAATGTTCAAGTTGGAGAGACATCAAGACTAG   | 6414 | A_95_P245547 DV159373     |
| 6716 | 80 | 1  | 1240 | GCTGGTGTATCATTATAGTTTTGGTGTTTTTCTAAGAATTGCCTGTTCAAAGATCCT   | 6249 | A_95_P033091 AF352797     |
| 6720 | 80 | 5  | 535  | TTGTCCTTTGATTGTGCTTATTCTACACTCTGTTATGTGAGTAGTGATCATATTTCTGC | 6257 | A_95_P263751 FG637333     |
| 6726 | 80 | 11 | 469  | GTACGAAGCTTAATTCTATCTCTCGGGTACTTGTTACCAAGAATTTCTTTCACGTAAT  | 6269 | A_95_P114212 CV021495     |
| 6727 | 80 | 12 | 463  | AGGCCTTTCTAATGTTTTGTGGAGCTTTTCCATAAACATTGAGAGTGTATCTTGTG    | 6271 | A_95_P028031 EB431080     |
| 6729 | 80 | 14 | 576  | CGCATATCTACAATTTCTTTCAAATGTCATGCCATTCAAGTGTAGCATTCAAGTTGTT  | 6275 | A_95_P055186 BP133634     |
| 6730 | 80 | 15 | 770  | AGCTTTTGGAAAGAACATCCAAGAATACTTGACGAGGAGGAGCCATTGCGGACGAT    | 6277 | A_95_P218642 TA21221_4097 |
| 6731 | 80 | 16 | 490  | AATGGTGGTTGTTTTCTTGTTCATTTGGCGATAATGTTGCTATGCCTGGTTCTATA    | 6279 | A_95_P018986 FG142809     |
| 6737 | 80 | 22 | 740  | GGGGTTATAGCAACAGATCAATTTTTGTACTTCTTGAATTAATCGAAAAGTTGTGC    | 6291 | A_95_P002046 TA16284_4097 |
| 6738 | 80 | 23 | 577  | AAGATTATGTGTGGTATTATGCCAGTGATGCCTACGTACGAGAGGTCTCATTGGAAG   | 6293 | A_95_P043496 BP130631     |
| 6740 | 80 | 25 | 647  | GGCTCAAACAACATGACTTCATTATGTTAGTAAATGGCAGTTGGAATGGTAAT       | 6297 | A_95_P280378 FG184459     |
| 6742 | 80 | 27 | 1715 | GCAGCTTTTTCTCGTGTATGTTTTCAAAGTACTGAAAAGTCTCATACAAGCAAAG/    | 6300 | A_95_P184492 TA13708_4097 |
| 6743 | 80 | 28 | 333  | CTTTCAATTTTTGGTTTTCTTCCCTTCAAGTTACGCGACGAGTTGATATGGCATTAAAC | 6302 | A_95_P025726 TA16842_4097 |
| 6748 | 80 | 33 | 331  | GCTACTCATTGTCAAGGTTCAACAAGTCAAGTATTTGGGCGCCCAATGTCTACT      | 6312 | A_95_P080700 BP528071     |
| 6749 | 80 | 34 | 1033 | CTGAATGTTTAGTACATTTCTGAGCTCCACTCATAATCCATGACTGTTCTGCGAAAA/  | 6314 | A_95_P028411 TA16149_4097 |

|      |    |    |      |                                                             |      |                           |
|------|----|----|------|-------------------------------------------------------------|------|---------------------------|
| 6750 | 80 | 35 | 406  | CTCGCCAAGTACCCCTTTTGCATTGCACTTCGTCGCAAGTTGATGTTCAAGATCAAGA  | 6316 | A_95_P100828 BP535535     |
| 6754 | 80 | 39 | 1478 | GAGTTTCAAACGGTTGGCGAGACGATTTTCGGTGATAAGAGAATTATTGTATAATTT   | 6323 | A_95_P021536 TA13961_4097 |
| 6756 | 80 | 41 | 726  | TCAACTTACTGCTGCAACATTACCATCTGTGTGAGAAGTATATACTGTAGATTTTCGCG | 6327 | A_95_P103437 EB683342     |
| 6762 | 80 | 47 | 444  | CCAGGCTATATGGGTTAACTCTCTGGGGATAAAACTGCTTGTAAGGATCTATAGTTG   | 6339 | A_95_P045491 BP131156     |
| 6767 | 80 | 52 | 764  | TTCTTCATCAGATCTGGTTCAGAATTTGACCTCACAGCTCGACGAGTAGCTGCTACAA  | 6349 | A_95_P228809 EB449914     |
| 6768 | 80 | 53 | 301  | CGAGTTTTCTTTATCAAGCAAGGGCATTTTGTCTGTAAAACCTCTTTCTGGGAAGAA   | 6351 | A_95_P040501 BP129847     |
| 6770 | 80 | 55 | 440  | AAGTTGCTTCTAAAGCACAGAGTTGCACGCGGAGATTCAAAACAAAGTGCCATGCA    | 6355 | A_95_P104497 CV017044     |
| 6771 | 80 | 56 | 893  | GAGTTCAACTTGTACCTTACTTTTGCATTGCCAGTAACTTTTGAGTCTTTTGGATGTG  | 6357 | A_95_P198642 TA16823_4097 |
| 6774 | 80 | 59 | 362  | GCCTTTGAAACTGAAAAAAGGGTCCTTCGCGTTTTCTTTTCTTGTCTTAATTTCT     | 6363 | A_95_P089563 BP530554     |
| 6776 | 80 | 61 | 701  | CTGGTGGTTGCATTTGTAGTTGAAATAATGAGGGAAGCAAAGAATAAAATTGATCCC   | 6367 | A_95_P026021 EB681115     |
| 6779 | 80 | 64 | 727  | GTAATTTCAATTTGTTGCGGACGATTTTCTCGAGCTAGCAGTACATGTGTTGGAAAAC  | 6373 | A_95_P314793 FG199468     |
| 6780 | 80 | 65 | 500  | CTATGGAACGTTTTTCTTGAGAAATTGAAACTTCAACTTTTAGGTGCCAACATGTCGA  | 6375 | A_95_P255584 EH616011     |
| 6783 | 80 | 68 | 435  | CAAAAGACATTCAGCTTGCCAGAAGAATTAGGGGTGAGAGAGCTTAAATTGGGATT    | 6381 | A_95_P195022 FS436591     |
| 6784 | 80 | 69 | 723  | TAGAATAGGTACTTGTTCACATTGGTGTAGATGGGAGTGAAGAGGAAAGGCCAAA     | 6383 | A_95_P163157 EH622136     |
| 6787 | 80 | 72 | 1004 | CATGCTTAGTAGAATGAGACATCACCAAAGTGACGATGTATGAGATTATATTTTGTCT  | 6389 | A_95_P212092 TA19755_4097 |
| 6788 | 80 | 73 | 57   | TGGTTAAGAGTGTATTATTAGACCCAGACGTGACCGCAGAATCACTGTCAATGAAAG   | 6391 | A_95_P111797 CV020376     |
| 6792 | 80 | 77 | 580  | TGTGCTTTTATTGAACTGGAAGTGGAACAAAGTGTGTTATATAACATGTTGCTGGA    | 6399 | A_95_P032101 EB683726     |
| 6796 | 80 | 81 | 1156 | AAGTACTATTGAATAGCAATCTGTTGTTTGGGACCTTGACCTCATGCTTTAGATCAA   | 6407 | A_95_P008731 TA12866_4097 |
| 6800 | 80 | 85 | 503  | ATGGGAAGGCAAGATTTTGTCTAGGAAAGACATTTATGTTAATGACTGCTCAAAC     | 6415 | A_95_P002326 FG643973     |
| 6802 | 81 | 2  | 849  | AAGGATCTCTTGAAATACATTTTAGAGTCACGGATCCTATATTCCAATGACCTGT     | 6418 | A_95_P216297 EB680805     |
| 6806 | 81 | 6  | 393  | TACTCTGAGCAAGAGTTGTAGCCAGATATTGGAATCAATCATAAAGATAACACTTCT   | 6426 | A_95_P088613 BP530146     |
| 6811 | 81 | 11 | 1156 | TTGTAACAGATTACTAGTACATTGGGTACTGGATCGCATCATATTCAATCAAAGCTTC  | 6436 | A_95_P201697 TA17479_4097 |
| 6813 | 81 | 13 | 690  | GCCCTCTATTTGAGCATAACATTCTATTTTCGTTAAGGGTGTGTTTTATATGGAGGA   | 6440 | A_95_P003606 TA12312_4097 |
| 6818 | 81 | 18 | 673  | TATGCTATATTTCAAGCACATGCACTTCACGGAGTAGTGATGATCTAATTAAGTGCT   | 6450 | A_95_P000661 TA12654_4097 |
| 6819 | 81 | 19 | 625  | GAGGCAGTGAAAATTAAGAGATTTAAAAAGCATGTTCGAAGCTTTTCATCGGGTAA    | 6452 | A_95_P064880 BP136179     |
| 6820 | 81 | 20 | 710  | GATTTTGATAATTTGAGGCATGAAGGGGAGGATGGTGAGTTGCAACCTAAGTTGT     | 6454 | A_95_P291333 EB678797     |
| 6821 | 81 | 21 | 1112 | AAAGCTGCTCGAGAAAGATGTGTTTCTGTGAACTGGGGAGGGATGTCACAGGGTTT    | 6456 | A_95_P180287 AF352797     |
| 6827 | 81 | 27 | 663  | TTCATCCACCTTCCCCTTCTTTGAGTAATAGCTGGTGCTCCTCTGTGAATAATTGCCT  | 6468 | A_95_P287733 FG190143     |
| 6834 | 81 | 34 | 648  | AGACTGGTCACCCTGGCACGTGATTGTCAAAAATGATCCCGTGTGCAACCTATGTAA   | 6481 | A_95_P066105 TA17246_4097 |
| 6835 | 81 | 35 | 1199 | CTGCTAGTTAGCTTAGGTCTGAACCGTAGAATTCGTTTGTTCGAATTTGTATGTTA    | 6483 | A_95_P238914 AB032536     |
| 6837 | 81 | 37 | 679  | TAAGCTTTTTGCTGTATGGAGGAAGGTTATTTCTATGCTGAGACGCTTCCCCATTGA   | 6487 | A_95_P145622 EB449379     |
| 6840 | 81 | 40 | 876  | TAGTAGATGTCCTACGCCGACAGAGATTTCTGCGAGACCCTGAAGTTATGACATCTT   | 6493 | A_95_P247897 DW000180     |
| 6842 | 81 | 42 | 758  | TGAGCTGTCTCGGCTTAGCTATTAGCTGTCTAAAAGCTATGGTAAATAAAATCCCAT   | 6497 | A_95_P139632 EB443435     |
| 6843 | 81 | 43 | 1855 | CCAGATGCTCACTCTGTACAGTTTATCTTACTTTGTATTAAGTAGTATCTAAGCTAACT | 6499 | A_95_P188412 TA14565_4097 |

|      |    |    |      |                                                               |      |                           |
|------|----|----|------|---------------------------------------------------------------|------|---------------------------|
| 6845 | 81 | 45 | 194  | GTTTCAGTGTGAAAGTTTGAAGGAATTTTTCTCACCGAACAAAGAAATGGCTCCCATI    | 6502 | A_95_P158832 EH616723     |
| 6846 | 81 | 46 | 1634 | TGCCTGTACAGCACGTTTTTGCCTGTAAAATGCCGTTACCTGTTGATTTCTCTCTAAT    | 6504 | A_95_P206572 AJ133453     |
| 6852 | 81 | 52 | 54   | ATACATAATCTGGACATGGTTACAAATTTGAGGAACATTTACAGCTCCCCCACCCTCTI   | 6516 | A_95_P050396 BP132385     |
| 6853 | 81 | 53 | 877  | GGTATATAGATTGTGGTTTGTGATTCTGCTGGTGTGTGACAACATTTTATATGTGCT     | 6518 | A_95_P296108 EB450034     |
| 6859 | 81 | 59 | 828  | GGTCTCCTCCAGTGTTCATCTTTACCATATATATTATGGATTTTACTAACCTAATAG     | 6530 | A_95_P010551 DV999830     |
| 6864 | 81 | 64 | 621  | CTGAGTGTGGATCGAAGGTGATAAATAAGCAAATGGTTGTATGCTTCTGCATTATT      | 6540 | A_95_P198252 DW004949     |
| 6866 | 81 | 66 | 573  | ACGTGTCCGATTGACAATTTGGGGTTAATTTGAGGGATGGTCACTTAACTTTCATTT     | 6544 | A_95_P282418 FG636054     |
| 6868 | 81 | 68 | 495  | TCTGTGTAGGTAGAAAGGATGTGTTTCTTTGTGCAAAAACCTGGGAACCTAAAATTTI    | 6547 | A_95_P119507 DV162724     |
| 6875 | 81 | 75 | 561  | CAGGGTATATACTTCTGCATTACCATTAGAAATAAAAGTGTGCAAATAATGCTTT       | 6561 | A_95_P025841 DW002115     |
| 6877 | 81 | 77 | 706  | CTGTTTTTACCAGTTTGTTCAGCGTCTATCTAAAAGTTCTGTCTTTAAGTTAGCTTAACTI | 6565 | A_95_P266706 EB439799     |
| 6879 | 81 | 79 | 733  | CAGTAATGTGCTGATAGATGCTGTGTGTGTTATCCTTGATTACTTTTTTGTATGTTT     | 6569 | A_95_P190132 EB677573     |
| 6880 | 81 | 80 | 830  | TGACAGTAGAGTTCTTGGGTCTTGTGGGTGAAGTTTAAAAGTCTAAAGTCACTGGA      | 6571 | A_95_P115382 DV157555     |
| 6882 | 81 | 82 | 842  | AGTCTGTTCCCTGTTTTTGTCTTTCCCTTGCTTCTGTGATGAATGGCTATTTAGT/      | 6575 | A_95_P017871 TC53016      |
| 6883 | 81 | 83 | 165  | AATATCTATTTGATGAATGTTAGCACGGGGGAAAACGTAATGTAACGTGTACTTAGG     | 6577 | A_95_P103032 CV016307     |
| 6887 | 82 | 2  | 834  | GAGGCAACTAGTCATTGTTTCTCTCGATTTACTGAGAGGTGTTTCTTCTTAATTGTA/    | 6419 | A_95_P119047 DV157598     |
| 6889 | 82 | 4  | 816  | TGTGACTGAAGCTCAGATGACCACCAGCACGCTTGTACTACATTGTCATTTATTGCTGA   | 6423 | A_95_P283963 FG139568     |
| 6891 | 82 | 6  | 70   | CTCTGTGCAGCTATTTTAGCCTGTATAGCTCTGACATGTATATAATATGCACATAATT    | 6427 | A_95_P131372 EB431558     |
| 6896 | 82 | 11 | 654  | GTTAGATCGTAGATGTCAACAATTGATGAAGATATTAGCAATATTGGATCATGTGTG/    | 6437 | A_95_P244297 EB683360     |
| 6903 | 82 | 18 | 1048 | GCTTTTGCCTTATATAATCTCTGTCTATTTGTGCTGCTGTTGTATCTTAAAGCTATG     | 6451 | A_95_P008791 TA13304_4097 |
| 6904 | 82 | 19 | 580  | AAGATACAAGTCAGGATTTAGATGCAACTGGGAAGGAAGAATTGGGTAATGATCT       | 6453 | A_95_P122142 DW002182     |
| 6912 | 82 | 27 | 758  | TACTCCTAGTGCTTGTATCGTTAATCGGTTGAGCTTAAACATTGAGAGCTAAGTTATT    | 6469 | A_95_P108167 EB440260     |
| 6916 | 82 | 31 | 1116 | CTCAGCTGCTGTACATAAATACATTGACCAGATTACCAGACCAATGCAGTTTTTAGTG    | 6477 | A_95_P024271 TA18940_4097 |
| 6922 | 82 | 37 | 223  | CGTGACCATTGAAAAGATTTCACTCTACGCTAGCTATTTTCAATTTATAGAGTTATGGAT  | 6488 | A_95_P140842 EB444664     |
| 6925 | 82 | 40 | 808  | GAAGTGGACAATATAAGTCTATAAATGAGGCACTTAATGCTGTGCCTAAAAAGAATA     | 6494 | A_95_P010086 EB426940     |
| 6930 | 82 | 45 | 836  | CCAGGAATGCTTTCGTTGGTCACTCGTATTGTTCTGTTTCTGAGCAAATGGACCTTTA/   | 6503 | A_95_P288948 EB445476     |
| 6931 | 82 | 46 | 550  | AGCGGAGTCGTGTATCTCCTTTTTATTGCAGTTCATGCGAAGATAAAGAATACATAA/    | 6505 | A_95_P039086 BP129448     |
| 6933 | 82 | 48 | 493  | CACAGAGATCAAATGTTCACTTCTCTTGACTAGAACATTTCCATGTATAGACTGCATC    | 6509 | A_95_P257529 AM808565     |
| 6941 | 82 | 56 | 508  | CTTCTTCTATTGTTATGGTGATGATCTATGTATTATGAAAGTTTGAGGCTAAATGGC     | 6525 | A_95_P088813 BP530227     |
| 6943 | 82 | 58 | 534  | TTTCTGTCAACATTGTTAGAACTTTAAAGATTGCCAGCTAACTGAGAAATTTTCTAC     | 6529 | A_95_P286308 FS412600     |
| 6947 | 82 | 62 | 806  | ACTGTCCATGTGTCAATCTAAAGGTTGATTGAGCAGCTTTAGGAGTTGATAGCCAG,     | 6537 | A_95_P270161 FG134970     |
| 6948 | 82 | 63 | 855  | GTGCAAACGTCCCGATTTGTTTGGGAACCAGCTTAAATGAAAGTGCGAAGTTGTT,      | 6539 | A_95_P178177 TA12171_4097 |
| 6951 | 82 | 66 | 420  | TTACGTCTTGTTCCTAGCAGTTCCATGTTTGAATGAGTGTGGAGTGCATAATTTCTG     | 6545 | A_95_P209012 TA19096_4097 |
| 6952 | 82 | 67 | 1580 | GTATCTATGCCCTGTAAATTTTTAGTCTCTAGCTACTGCACTATTGATCCTATTAATG,   | 6546 | A_95_P210682 TA19448_4097 |
| 6953 | 82 | 68 | 747  | ATGCTTGTCTTTGTCAAGGATATTTGAGCTCTATCAACTTTGATGCCAAAGTTTTGGTI   | 6548 | A_95_P102672 TA12018_4097 |

|      |    |    |      |                                                              |      |                           |
|------|----|----|------|--------------------------------------------------------------|------|---------------------------|
| 6955 | 82 | 70 | 500  | GGACAGAAGAAGGGAGGTCTTGCTTGAGTAATCTTTCCTTATTTGAATGTGTA        | 6552 | A_95_P304698 FG638411     |
| 6957 | 82 | 72 | 439  | CCCGTATAATGTAATGAATATGACCCTGTTTACTTAAGTTGATCCTGCTGGGTTGAAC   | 6556 | A_95_P021851 TA12197_4097 |
| 6961 | 82 | 76 | 76   | TGTCCGAAAGCTACAAACAATGTATTAGTTGTTTGATACAATCTTGGCATGGCTTCT    | 6564 | A_95_P098018 TA18268_4097 |
| 6965 | 82 | 80 | 571  | ATGACAGTGTGAGATAAGGATGATTTTGGAGGACAGACATGTTTGCCTGTCTCAGAC    | 6572 | A_95_P054591 BP133478     |
| 6966 | 82 | 81 | 659  | GCGGCTTCTGTTCTCGGGGAGGTTGAAATGATATATGAATATTATTATTGAAGAGGA    | 6574 | A_95_P195192 TA16062_4097 |
| 6976 | 83 | 6  | 851  | TGTGGTGTCAATTTTACTTGGGCTGCTGACAGAGATGAGGAAAAAACTGATGGGCTTC   | 6593 | A_95_P229634 FG159651     |
| 6984 | 83 | 14 | 299  | GCTACTATCGTGGAGCCCATGGCATAATAATTACTCTAGTGGTGTGAATCACTAGTG/   | 6609 | A_95_P155742 EG650239     |
| 6990 | 83 | 20 | 737  | CACACAATAGCACTGTGCTGAAATTTACGAAATCAAGGTGCTTTAATGTCCTGTTAT    | 6621 | A_95_P135192 EB438480     |
| 6993 | 83 | 23 | 821  | ATTCCCAATATTTGGTTACCCCTTGCTTGTCAACTCTGCCGTTTACCGATTTGCTTGGC  | 6627 | A_95_P220877 DV162339     |
| 6996 | 83 | 26 | 840  | GAGCGTCTCAAGAAGAAAGGCTATGAAGTGCTCTATATGGTTGATGCCATTGATGA/    | 6633 | A_95_P130272 TA15509_4097 |
| 6997 | 83 | 27 | 986  | TCGGATAGAATTTGTTTAGGTTTGTAGCGGTCTTTGTTGTATTACATTGTTGTTTT     | 6635 | A_95_P216722 TA20766_4097 |
| 6999 | 83 | 29 | 491  | TTGTTTGTGTCGCTTGCTGCAGCACTGGTAGAATCCCATCCTATAAGCACAGAACTG    | 6639 | A_95_P094473 BP532734     |
| 7000 | 83 | 30 | 1107 | AGAGAACTAAGATGCATGATTGTATCAAATATTTCAATATCGATGCTTTGGTGACGG/   | 6641 | A_95_P011691 TA13363_4097 |
| 7004 | 83 | 34 | 816  | CTATTCTGCAAATAATCAGGCAAACCTTCTGATGATGCTTTATGTTCTAAAACGTTGAA/ | 6649 | A_95_P014671 EB450443     |
| 7008 | 83 | 38 | 267  | ATATAGGGACGCAGAACACATGTAATTCTCCAGAATCTTATGCCATGCTGTTCTTTT/   | 6657 | A_95_P142702 EB446132     |
| 7009 | 83 | 39 | 311  | GCTATGCTTCTTATAATGTAATCTGGTTGGTGTCAAGTTTGTGTTGTGAAAGATGGTTG  | 6659 | A_95_P003586 TA13678_4097 |
| 7021 | 83 | 51 | 522  | TATGTGGAGTTGTTGATGATGGGAAAGGATGTGGAGAAATCCAACCTGAAGACAT/     | 6683 | A_95_P281208 AM791968     |
| 7026 | 83 | 56 | 492  | GCTCTAAATACAAATTGGTGTGCACTTGAATTGTGAAGATTCAAATGGTTTCTGCCA    | 6693 | A_95_P209677 TA19241_4097 |
| 7030 | 83 | 60 | 1099 | TTCCCAAATCGAACTGTATGTTGTTGTATGTATCAACCAATATTAAGAGCACCGGTT    | 6700 | A_95_P154167 M94135       |
| 7032 | 83 | 62 | 775  | GCAGCTATGGATGTTTCTTGTGCTGCGCTAATCTTGTGTCATTTTCATGTATCAAATAA  | 6704 | A_95_P212862 DV158792     |
| 7034 | 83 | 64 | 488  | TAAAATTGAATTCTGAAACCTTGCAATACTCTGCACTATGTTGCTCTCTAGTCATTAC   | 6708 | A_95_P186487 TA14138_4097 |
| 7036 | 83 | 66 | 655  | CTGAGGTGACTGACCATTGGGAAGCTTATACTATTTTTAAAGACTTGAACCTGATACA/  | 6712 | A_95_P144507 EB447883     |
| 7041 | 83 | 71 | 198  | GCATGTCAAGTGAGTGCAAAGAACCCAGCAGTTTGCAGTTTACAAGTTTCCAGTTA/    | 6721 | A_95_P115162 DQ460120     |
| 7048 | 83 | 78 | 0    | AGAGAGTGTGGAGTTCATGTGGAGAAGGTATGCAGATGACAAAAGATAATCCCAG      | 6735 | A_95_P309343 A_95_P309343 |
| 7051 | 83 | 81 | 244  | GGAGTAGGGAACATGAGAGTAAAGTTAGGTGAGTTGAATACTGTATGTTTACAGAT     | 6741 | A_95_P143677 EB446915     |
| 7052 | 83 | 82 | 453  | CGTACTTAAGTGCCAGCTGTTTTGATCATGTTGTTTAGCTATAATGTGAAAGTGAATA   | 6743 | A_95_P005786 TA13604_4097 |
| 7055 | 83 | 85 | 858  | GCCGGTGTAATAATGCTAATGACTATATTAACAGAGACTGTAACATTTGTCAGTTCTTA  | 6749 | A_95_P021616 EB446173     |
| 7056 | 84 | 1  | 730  | TACTTCACATGGAGAAGTAGAGGCCTGGGAGCTTATCAGCACTAACATATTGCGCAA    | 6584 | A_95_P265341 EB428206     |
| 7058 | 84 | 3  | 856  | TGATACAGGTCCTTGCTCTATCTTATTATGTTATCTCCTACTTCCCCGGAGGTTGAGCT  | 6588 | A_95_P226229 DV161010     |
| 7063 | 84 | 8  | 762  | CATGCTTGGAGATATGCCCAACGCTGTTGCTGCGAAAAGAAATGAACCATAACATGG    | 6598 | A_95_P146007 DW000151     |
| 7066 | 84 | 11 | 733  | CGGCTACAATTGTCAACTAATCCATATTTGGAGAGAAATGTGGAATTTTGTATTGAA/   | 6604 | A_95_P148073 TA14583_4097 |
| 7070 | 84 | 15 | 671  | CTTTTGCACACAGTACCAATTTGTGCAAGATCTGTAGTTTACTGAATATGTGGTTTGT   | 6612 | A_95_P001186 DW003166     |
| 7071 | 84 | 16 | 805  | CTGAGAAGGAGACCTATTCTTTATTGAACGTCGGCCCTAGAAGCAACAAATTGTTTA/   | 6614 | A_95_P218197 TA21119_4097 |
| 7072 | 84 | 17 | 198  | GGGTTGTTGATTTTGTAGTTTGTGGTGCATCTATCAAACCTTAAACCCAGTTTGT      | 6616 | A_95_P141262 EB445034     |

|      |    |    |      |                                                             |      |                           |
|------|----|----|------|-------------------------------------------------------------|------|---------------------------|
| 7082 | 84 | 27 | 188  | TGTTCTCTGTATGTACACTCAAACGGATGCCAGTAATTATCCTCAGTACTTTCTGT    | 6636 | A_95_P132307 EB432770     |
| 7085 | 84 | 30 | 284  | ACCCTTTACTGGTGTCTCCGTTGAGATCAACGTGTCCTACTTGGATAGCTGCTTAATG  | 6642 | A_95_P105672 CV017561     |
| 7086 | 84 | 31 | 830  | ATGACAGTTATCACCATTGGTGCTGAAAGATCCGCTGCCAGAGTCTGTCACATCATC   | 6644 | A_95_P224822 FG139197     |
| 7089 | 84 | 34 | 863  | GGTGGCTCGGAAGTTTTGTTTGTATGTTGCTTAAGATACTGAATTCGAACTATTTT    | 6650 | A_95_P176802 AF154660     |
| 7093 | 84 | 38 | 753  | CGATATTCGAACATCAGATTATTTTATCCTGTAGCAACTATTCCTCACTTTTTGGGTTG | 6658 | A_95_P140297 EB444258     |
| 7096 | 84 | 41 | 651  | ATGGAGGCAACAAAAGCAGTCAAGCCATTACTCGGAGACTACTACCAATTTGACGG/   | 6664 | A_95_P148782 EB678289     |
| 7098 | 84 | 43 | 401  | TTTACAATTACGTAAGTTGTATGTGACCTTGAGCGTCACAATGGTTAATTTTAAGGG   | 6668 | A_95_P308718 FG643422     |
| 7104 | 84 | 49 | 410  | GCTTAAAATGAAAATCTTTTATGAGCCACTCAAAGCAAGAAAGCCTGAGCGGGCTGT   | 6680 | A_95_P130922 EB431045     |
| 7108 | 84 | 53 | 779  | TTGGTGCTTTGTTTGTAAAATTTGTTGTTTCACATTCGTGTGGCGTATATGAGTTTCAT | 6688 | A_95_P000221 EB438050     |
| 7109 | 84 | 54 | 399  | TTGGGGAATTTTGTGGACAACAGCTATGTACATAGAAGGAAAAGTGACATTGTAGC    | 6690 | A_95_P104792 TA12994_4097 |
| 7118 | 84 | 63 | 702  | TCGGAGGCCTTTAGTTGTAGTACATGGAGTAGGCTGCTTCTGCTTATCAATTTACA    | 6707 | A_95_P148157 EB677366     |
| 7128 | 84 | 73 | 849  | GCACCATAGGTGGTAGTTTCTACTATATACATAACCTGCTTGGTTCCAGATGTA(     | 6726 | A_95_P009456 DV162425     |
| 7129 | 84 | 74 | 768  | TTTTCAAGTATGTTTGCCTTGCTAAAGGATCCGGCATTGGCAATCCATCTCCACCATT  | 6728 | A_95_P245292 DW004658     |
| 7133 | 84 | 78 | 961  | AACTTATCATGATGAGATGGTGCTTTTTGGACTCTTTTGTGACATTGTAGCATGAA    | 6736 | A_95_P000426 TA12032_4097 |
| 7135 | 84 | 80 | 813  | CTCTAAGGCATGATTTTCTAGGCAACAACGCTAAACAATTGATATACACTTTATCGT,  | 6740 | A_95_P199252 TA16953_4097 |
| 7139 | 84 | 84 | 553  | ACCAAAAACCCCTCTTTATTGGGGTTGTGGGAACTACTTTCATACTTCAGATCATT1   | 6748 | A_95_P036908 BP128858     |
| 7140 | 84 | 85 | 817  | GAGCTTTCTGACCTCAGAGCGATGGTTCTCACTGTTATTTTAATTTTCTTATGTTTGA  | 6750 | A_95_P218887 EB677936     |
| 7142 | 85 | 2  | 1080 | GCTGAAGTTTCTGCACAGCTGATTTATGATCTTAGGGTGTCCAATTCGACGATTCTT,  | 6753 | A_95_P216637 TA20749_4097 |
| 7144 | 85 | 4  | 1286 | CCCATTGTAATAAAGACTTGAGATGCTTTGTTATCAAAGAAAGCACGAGCCTTGATA(  | 6757 | A_95_P187327 TA14320_4097 |
| 7146 | 85 | 6  | 686  | ATGAGCTTTCGTTTGATAGGGAGTATCCTTGGATTGGTGTTGAGAAAACCGAGCCAT   | 6761 | A_95_P138032 FG160063     |
| 7149 | 85 | 9  | 1174 | TCTCCATCTGAAGTGGAGCACCTCTGTATGTGTATACTCGTTTTGCCTGGGAGATTTT  | 6767 | A_95_P195242 TA16072_4097 |
| 7150 | 85 | 10 | 1352 | ATTCTTCCATAGTTTTTGATGTAGAAGATTTTTGTTCAAGTTGCTTATATTGCCCGTCG | 6769 | A_95_P023866 TA13974_4097 |
| 7158 | 85 | 18 | 755  | CCTGAATTCGGTATTGTGAACCTATGACGTGTTGAACTTTTTGTTTTGTATTCCAAGT  | 6784 | A_95_P000061 DW000215     |
| 7159 | 85 | 19 | 545  | TCTGCCTATCCCTGTTTTATCTGGAATTAGGAAGCCAAGTTTACTTAAATGTA(      | 6786 | A_95_P133222 EB434534     |
| 7161 | 85 | 21 | 438  | GAATCCACGAAAATGGCCCTATTTCCGTAGTGTGAAATACCTGACAATAGAAGGAGC   | 6790 | A_95_P137822 EB680983     |
| 7163 | 85 | 23 | 730  | CTGCTGGGTGTTTAAATGAGCTAAAAAACATCCTTTATTTTGTGGCTTATTAAGGTC/  | 6794 | A_95_P244422 EH615725     |
| 7164 | 85 | 24 | 159  | TATAACTGGTTTTTCGTAAGACTCAAACCTAATATGCCTCATATTTTCTGTTTCCCC   | 6796 | A_95_P139437 EB443182     |
| 7167 | 85 | 27 | 254  | TGTATCCTTCTGAATATATGATCCCTCACTATAGCTGAATCAGTTAGCCGCTTATGGT  | 6802 | A_95_P129947 EB429882     |
| 7173 | 85 | 33 | 978  | ATAACCCATTTGAAATGTATATATCACTAGAAGCAGGTCCCAGGTGTAGCTTTCTTCA  | 6814 | A_95_P206032 TA18418_4097 |
| 7177 | 85 | 37 | 329  | CTTCTTTTCTCGCCATGGCTAAATTTGGTGTCTAAGCTTAAGTAAACGTATGGGGT    | 6822 | A_95_P102792 CV016201     |
| 7179 | 85 | 39 | 1376 | CCAAGTTTCTGGGTAAGTTTGGAGATAATGGAAAATCATGGATTGAGATGTTAAA     | 6826 | A_95_P179592 TA12545_4097 |
| 7186 | 85 | 46 | 0    | AGAATCTCTTCTGTGAATGCATGTCAGCTTTTATGCGAGCTACTGAGCGATGTTTAC   | 6840 | A_95_P309738 A_95_P309738 |
| 7188 | 85 | 48 | 845  | ATTGAGACATGCAGTATGCAGTTACCTTGGATGTCTACCCACGGTTTTCTCAGCTT    | 6844 | A_95_P310253 FG172986     |
| 7190 | 85 | 50 | 1235 | TGGATAAAACAAGATAAGCGTCGATGGGCTTTCACAGATTTACAGGCAGCTTCACC    | 6848 | A_95_P011956 TA14869_4097 |

|      |    |    |      |                                                              |      |                           |
|------|----|----|------|--------------------------------------------------------------|------|---------------------------|
| 7193 | 85 | 53 | 456  | TTGAGAAATTAGTTACTGGTTTTTCTATGTTGCGTCTCCTTGGGAATTGCAGTTTTCTCG | 6854 | A_95_P028081 TA13900_4097 |
| 7199 | 85 | 59 | 570  | ACTCAAACAACCTCGATTGGAGTGTTTTGTTTACCATGACTGGAATTTGTACAGTTT    | 6865 | A_95_P192322 EB678300     |
| 7202 | 85 | 62 | 520  | CACAAATTTGCTTGTGCTCTTTTAGTTGTCAGTATAGGGAATAATGTTCTAGGCAAAG   | 6871 | A_95_P026176 BP528510     |
| 7211 | 85 | 71 | 848  | ATACAAAGAAGCACTCATCACCTTTTTGATCCTGATGAGTTGTTGACGGTTGCTTTTG   | 6889 | A_95_P126322 EB425654     |
| 7214 | 85 | 74 | 719  | TTGAAGGGCTGAAGCTGGATGACATAGAACTGGCATATACAATGTACTGTCTGC       | 6895 | A_95_P144162 EB447314     |
| 7215 | 85 | 75 | 775  | CTTGAGCTCTAGAGGGAGAGAGCTAAAGATGTCATCTTTTTCTCTGGGAGTATTAGG    | 6897 | A_95_P302118 FG172161     |
| 7220 | 85 | 80 | 727  | GTTGCTGCATAATAGTTATTACTGGAGTATTAGGTTGATTTCTCTTCCAAGTTCTCT    | 6906 | A_95_P153442 EB683711     |
| 7221 | 85 | 81 | 2010 | GGAGAGGCTTGATTGTACAGAATTTTCTACAAGTAAACAAGATTCTAGTGCTTGTTC    | 6908 | A_95_P028036 EF520286     |
| 7222 | 85 | 82 | 411  | TGTGACACCAGGCTTGGCACACACTAGTAGAATTTTGGATTTAATTTTCTTGC        | 6910 | A_95_P049796 BP132249     |
| 7225 | 85 | 85 | 712  | CAGTTCTATTCCAGCCTTTATTTGGCTTACGCTCATTTTCATTGTTGTCAAGGATTTGC  | 6916 | A_95_P216012 EB679884     |
| 7227 | 86 | 2  | 762  | GTAGCACTTAATACTTGTGGACATGTCTTCTGCAAGAAGTTTTGCGTGGGTCTGTGAC   | 6754 | A_95_P252654 FG640566     |
| 7228 | 86 | 3  | 823  | TCTAATTTATGCCCGTGTAGTCAAGGCCAACACTGGAATGAACCCTGAGCTATCTTGC   | 6756 | A_95_P011761 EB441379     |
| 7238 | 86 | 13 | 141  | TTTCACTGGTCTTAAGTCAGCTGCCTCATTCCCTGTTTCAAGGAAGCAACAACCTGCC/  | 6775 | A_95_P113007 CV020957     |
| 7253 | 86 | 28 | 776  | GTAGCAAATTTTGATGACATTCTTCTCAACTCTGATGCATTTATGGTGGCAAGAGGTC   | 6805 | A_95_P192257 Z29492       |
| 7255 | 86 | 30 | 900  | GAGTTGATGGAAAATTGTCTCTGATGGATAAAACACCAGAAATGCATTGCAATGT      | 6809 | A_95_P225552 DV161327     |
| 7257 | 86 | 32 | 890  | TCCATATGGCCTGTCAAATTATATTATTGATACCGACTCTCTAAAATCTGCTTTTCAG   | 6813 | A_95_P011751 EB681792     |
| 7260 | 86 | 35 | 951  | GCTATAATTTGTTATGGCCCCGTGCAACATGTATGACATTCGCTTAAATATTTCTCTC   | 6819 | A_95_P008271 TA12344_4097 |
| 7262 | 86 | 37 | 1261 | GTGAATGAGTCTTTTTGACATGGAAGAAGTGGTTGATGTTAGTAAGAAATAGAAAGC    | 6823 | A_95_P026451 TA17910_4097 |
| 7263 | 86 | 38 | 771  | TGAGAGGGAGCTTTGCTTAGGTAAGTTCCTTCAGTCAACTTCATTTAAAGTGAGCTTT   | 6825 | A_95_P126542 EB425874     |
| 7265 | 86 | 40 | 771  | TGTATGATAAATATGCTATTGAAGATAGGCTTCTTACTGTCCGCCATTAGCAACTGCT   | 6829 | A_95_P205797 TA18367_4097 |
| 7266 | 86 | 41 | 533  | GAAGAAACAAATCTTCTAGAGGGCCGGGATATTCACATTCATTTCCCGCTGGAGCTC    | 6831 | A_95_P051821 BP132749     |
| 7267 | 86 | 42 | 1036 | CCTACCTTTTGTATTTTCAAGTATGTATACTCCACATGAAATGAGTGATTACTGATCTTC | 6833 | A_95_P027981 TA16733_4097 |
| 7270 | 86 | 45 | 665  | GATTGCTTTGACAGGTTTTATTGGTGTTCCTCAAGTACACGTCCAAGGAACATAATTTT  | 6839 | A_95_P179742 TA12575_4097 |
| 7272 | 86 | 47 | 2491 | ATTGTCGGCTTGCTTGTACTAGTCTTTTGTAGTGTACTACCTTTCATGTTCTGCGGAA   | 6843 | A_95_P013486 X83730       |
| 7275 | 86 | 50 | 210  | ATAGCCCCAATCTTGCTGAGATTGCTAAAAAGATGCCCCATGTTAATATTCCTCAAG    | 6849 | A_95_P108277 CV018765     |
| 7276 | 86 | 51 | 491  | CTTGTCTTGTCTAGTAGTGTGAGTATTTTAGGCGGTTAAGATTTTGTCAAGTCTTTT    | 6851 | A_95_P129847 EB429796     |
| 7280 | 86 | 55 | 289  | TATTCGCACGCCTCAGCATTCTTAGCTTTTGGCGTATTTACTTTGCCTTGGATTATTG   | 6858 | A_95_P112107 TA12957_4097 |
| 7294 | 86 | 69 | 780  | CAAACGTTCTTCTCGCTGCATGTAACATCTTACTTCTGAATCAATTTGATTGAAGA     | 6886 | A_95_P182302 TA13183_4097 |
| 7296 | 86 | 71 | 406  | AACTGTACATTATGCTCAAAGATATGTTCCAACACATACTCAACAGTACTCTCTATCTC  | 6890 | A_95_P100723 BP535496     |
| 7297 | 86 | 72 | 388  | GTACTTATGTACCACTGTGAATGATTAATGATTCTGATCCGACACAATTTATCCCTGT   | 6892 | A_95_P196682 TA16391_4097 |
| 7300 | 86 | 75 | 264  | GTTTACTCCCTCTACGCCCAAGGTCAGAGCGTCATGGAATTGAACTAGTAACCTTA     | 6898 | A_95_P112727 FS383836     |
| 7302 | 86 | 77 | 578  | GCTCAACAATTTCTACTCTACAAGCTACTTGTACTACTCAAATTTTAACTGTGAAGT    | 6901 | A_95_P276813 FG639951     |
| 7309 | 86 | 84 | 816  | AAGGTACAAGATAACATTGACTATGACCGCATTACTAGTTTCGTGTGATGGATACACTC  | 6915 | A_95_P139227 EB442966     |
| 7314 | 87 | 4  | 319  | CAGATTGTTACCGTGTGTTACCTTTTGTGGATCTGTATTTTACGAAAATTATCTGGG/   | 6924 | A_95_P161532 EH620238     |

|      |    |    |      |                                                             |      |                           |
|------|----|----|------|-------------------------------------------------------------|------|---------------------------|
| 7315 | 87 | 5  | 525  | CTACTGCAAATTTAACAGTGGATATGAATGTTGACCCTAAGACATTTCTCAGTCTTTT  | 6926 | A_95_P124712 DW004497     |
| 7321 | 87 | 11 | 793  | TTGTGTACGACATCTTCTGGGTCTTTTAACCCAGTGATGGTTAGCGTTGCTAAATCT   | 6937 | A_95_P200417 TA17204_4097 |
| 7322 | 87 | 12 | 900  | GATAGCCTGTTGACGTGGCATGCATTCCAGAAAATTAGGGACGTGACTTTGGAAAA    | 6939 | A_95_P185302 TA13882_4097 |
| 7328 | 87 | 18 | 433  | TGGCGACGTGATTTTGAATTCTCTACGGTCCCTTTCTCAGATTTGCATATTTTGTGC   | 6951 | A_95_P077250 BP527198     |
| 7330 | 87 | 20 | 793  | CAGCTGCAGCAGTGAATGATGAAGTACGAATTCTGTACGTATACATTTGAGAAAGA    | 6955 | A_95_P236694 FG140148     |
| 7332 | 87 | 22 | 851  | CATGATGAGTCTCTAAAATGGTTGACGGAGGTGTCATTTGCATTGATTGGCTTTGAC   | 6959 | A_95_P262736 DV159797     |
| 7334 | 87 | 24 | 678  | CAGATTGGGATGAGCAGAGGGCTGAGTGGTTGAAAAAGAATCTTAATTTTCTAATT    | 6963 | A_95_P070930 FG132816     |
| 7335 | 87 | 25 | 806  | CAGTCCCCTCCCTTAGGTTACAGCCAACGAAAAGTTTTGTTGTAGGTAATTGAA      | 6965 | A_95_P116982 DV159759     |
| 7337 | 87 | 27 | 739  | GCAACCGTTAGTTTCTTCTTAACATGTTTTGTGCTGGATAGTTCACTTTGTCTTTTGT  | 6969 | A_95_P117977 DV160995     |
| 7338 | 87 | 28 | 458  | GTGATGTGATGTGGGAGGAAGTTATCATCTAGTTGTTAGGAATGAAATGTTAATTAG   | 6971 | A_95_P114097 CV021441     |
| 7340 | 87 | 30 | 701  | AGGTCCTAATCATGGTGGAGTGTCTTCTAGAGTTGAAAATACTGGTTTGCTGTT      | 6975 | A_95_P162897 EH621890     |
| 7341 | 87 | 31 | 1401 | GGGGTTTGAACTGATTATGTCTTTGCTATTGTGTATTATTAGATTTTGGTATGAA     | 6977 | A_95_P184622 TA13734_4097 |
| 7348 | 87 | 38 | 0    | TCATCAACAACCTGCAACTGAACTTTGCTCATATGCGCGAGAGTATGGCATCCAGAGA  | 6989 | A_95_P285598 A_95_P285598 |
| 7357 | 87 | 47 | 1329 | ATCTTAAAGAAGATGGGAAGGGATACACCTAGGCAAGGTGGTCCAGAAAAGACGGT    | 7007 | A_95_P238044 AY553214     |
| 7359 | 87 | 49 | 407  | AAGGAGCCATTTTGTCTTCACTCTGAGAAATTCGGGTGTGAATGAGAATACCGAGCA   | 7011 | A_95_P006876 NP916877     |
| 7361 | 87 | 51 | 465  | GTTTCTTCTCTTGAAGCTACTAGGTTCTCCTGATGATGCCAGCCTTAGATTTCTGAG   | 7015 | A_95_P038066 BP129169     |
| 7365 | 87 | 55 | 970  | TGAAGAATTCCTATGACACAGGAAAATTGCTTTCAGCGGTTCAATCTACCCGAGCCT   | 7023 | A_95_P214522 TA20280_4097 |
| 7368 | 87 | 58 | 835  | ATGAGACATTCCGCAACTCAAGATTCGAGTTGCCGATTACATACGCTATCGGAGGA    | 7029 | A_95_P128917 EB428663     |
| 7377 | 87 | 67 | 766  | CTGTTCAATTGTTGGGGTTTTGTTGAACCATGTCTACGGAGACTGTAACTTTTATTAT  | 3665 | A_95_P000026 EB439159     |
| 7378 | 87 | 68 | 797  | CTGATAACGTTGGACATCCCAAAGATGTTGAAGAGGCTGCTGGTGATAAAGTAGCTC   | 7047 | A_95_P230589 DV158076     |
| 7381 | 87 | 71 | 418  | CTTGTAAGGGACGAAACCTTTATAAGTTGAAGACTTTCAGACGGGTGAACCCGCAG    | 7053 | A_95_P222532 TA22054_4097 |
| 7382 | 87 | 72 | 686  | CCATAATTTGCTTAGCCATGTTTTAATGTGTACCTTCTAAATGAGGTCATGTCCATTT  | 7055 | A_95_P129382 EB429240     |
| 7385 | 87 | 75 | 392  | CTCCAAGCATCTCAGGTCTCTCTTTCTCTCTCGTATATCAATATACTTACTGGTACTTC | 7061 | A_95_P094543 FS379071     |
| 7387 | 87 | 77 | 763  | TGAAGAGTGTGTTTTTTCATCCAAGTGAATTTTACCCTGTCTGGACACTGGAACCTGCC | 7065 | A_95_P133037 EB434087     |
| 7390 | 87 | 80 | 1268 | CAATACCAGCAAGCGGATTGATGTATTTTGGAGAAGAAATCAGAGAAATCTTGTGTTG  | 7071 | A_95_P009411 TA12015_4097 |
| 7394 | 87 | 84 | 885  | ATTTCCACAAGGTCACTGCTCCATTTTGGACAGTGCACGGGACATCTGATGGTGTAC   | 7079 | A_95_P002376 TA14115_4097 |
| 7398 | 88 | 3  | 614  | TACCAGTAGTATAGTCAAAACCGCAGGCAGCAATTTCTCGAAAAAATGGTTTTGCAT   | 6923 | A_95_P141157 TA15893_4097 |
| 7405 | 88 | 10 | 552  | TGAAACTTTGATTAATGTGAGCTATTATGTGAATGTTTTTATAGAGGCGGGTGGATG   | 6936 | A_95_P122817 FG134826     |
| 7413 | 88 | 18 | 612  | TAGGGCTGTTTAAACAGAGTTTGGGGATGAAACAACCTCTGAAATCTAAAGCTTGCTT  | 6952 | A_95_P250422 EB683598     |
| 7414 | 88 | 19 | 368  | ATGTAGTCTCCAGTTGTGTTTTAGTTCGATGAATGTACTACCAAAAACCTCTATTTGT  | 6954 | A_95_P265971 BP532939     |
| 7416 | 88 | 21 | 557  | GCGCCCTTCTATCATTTGTGAATTCGATAGAATATCAATCAGGTAGACAGACTTTG    | 6958 | A_95_P025486 FG639535     |
| 7418 | 88 | 23 | 1389 | TTTTAGCTTACCAAGACAGTTTGTCTTCTCCCTCGCTGTAGGGTGGTGGGAGAGAT    | 6962 | A_95_P203627 TA17893_4097 |
| 7427 | 88 | 32 | 576  | CCTTAATGTTCAATTGAGCATCTCATACCAACGCTCTGATGGATAAGATGAATGGCAA  | 6980 | A_95_P068175 BP137068     |
| 7434 | 88 | 39 | 616  | GCTTTTAAACAATCCCGAGAGAGCTGTTGAATACTTGTACTCTGGTATTCCCGAGACAC | 6992 | A_95_P190177 FG160178     |



|      |    |    |      |                                                              |      |                           |
|------|----|----|------|--------------------------------------------------------------|------|---------------------------|
| 7438 | 88 | 43 | 816  | GACCATTTAAGACAAGATGGTCTATTACATAACAACATGTGGAACCTCTGCATATGTAC  | 7000 | A_95_P243107 DW000648     |
| 7440 | 88 | 45 | 958  | TAGATGTATGATGTGACTCCTTCAGAAAATAATCTAAAGATGGTTTTGTACCTTTTGC   | 7004 | A_95_P177282 TA11933_4097 |
| 7444 | 88 | 49 | 865  | ATCATGATTCTGGGAAGTGAAGCTCTCTGAACAAAGGAAAAAAGATGCTGAGAATT     | 7012 | A_95_P277193 FG146297     |
| 7446 | 88 | 51 | 54   | CGTCTTCTTTCACCACAAGCGTCTTTGGAAAATAAAAGTCTCATATTCCTTACCACG    | 7016 | A_95_P034618 FG642309     |
| 7448 | 88 | 53 | 0    | TCTGGGCATGTGCAACGGAGCAACTCCTTTACAATAACTAGCAATTTGATATATATAA   | 7020 | A_95_P030116 A_95_P030116 |
| 7455 | 88 | 60 | 878  | ATCATGCAGTGTTCCAAAGACAAATGGTAAAGAGGACTGGAGTTGTGCGCTTTGCCA    | 7034 | A_95_P292653 EB427898     |
| 7464 | 88 | 69 | 636  | TTAGCCTATACTCTTGGTCTTTAACCCAGCCCAGTCGCTGTTAAATGATGAGGTTTG    | 7050 | A_95_P300378 FG636919     |
| 7466 | 88 | 71 | 522  | AAGTTGCTGGTTTATTTGTTTATACCGCTTGTTCAACCTGTGTCGAAGCGAGGAAT     | 7054 | A_95_P125342 DW005134     |
| 7469 | 88 | 74 | 589  | CTCTCTCAGAAATGAACAAAAGCAGAGTTAGATTTGCTAGCTGATTTATCACCTTT     | 7060 | A_95_P304358 FG638642     |
| 7475 | 88 | 80 | 611  | GTTTTATCAGTTGTGCTGGTGTGCAATAGCAAACCTCTCTAGTGTGAAGAAAGTTA     | 7072 | A_95_P031066 TA18216_4097 |
| 7479 | 88 | 84 | 781  | CGAATATACTGCAACGAATCCGATTATCGGTTTTCAATAATGAAATCCATTTTCTTCTC  | 7080 | A_95_P011861 EB677971     |
| 7481 | 89 | 1  | 188  | TACTCTCCAACCACTACTCCAGCTAGCATGGAGAAGGATATCAAGAACTTTTGGGG     | 7082 | A_95_P034339 AJ718476     |
| 7482 | 89 | 2  | 368  | CTTCCCTCCTTAGCTTGACCGGCAATAAATTGGATTTTGATTAATGTTATATGACAGT   | 7084 | A_95_P301693 FG635768     |
| 7483 | 89 | 3  | 642  | AAACTATCAGAACCTATAACAGGGCAGACTATAGCAAATGGGCGTTGCTGGGCAT      | 7086 | A_95_P062270 BP135474     |
| 7484 | 89 | 4  | 610  | GCTGCTCCCCGGATGGTTGTTAATTTATTGAAATTTATACATTTCTTTAAAATTGC     | 7088 | A_95_P016811 TA14193_4097 |
| 7487 | 89 | 7  | 1309 | TAGAACCAACAAAGACGATGAAATTCATGAGAATAATACTTCAGGAGCAAAGCTTCA    | 7094 | A_95_P176502 Z48603       |
| 7488 | 89 | 8  | 857  | AGATTTACCAGATGCTGGAAAAGTATATATTTTTGCCTGATCTACTTCTGCAACCTT    | 7096 | A_95_P232804 EB677793     |
| 7490 | 89 | 10 | 308  | GCATGATCATGTTTGTGCAACTCATAGGTTACCTGTATAGTCTGTTGATTATTTGA     | 7100 | A_95_P107517 CV018414     |
| 7493 | 89 | 13 | 1160 | GAGGACATCAGCTCTTTGTTGACCTCTCAACCTTGTTATCTCAATGTCACCAATTTA    | 7106 | A_95_P139322 TA11997_4097 |
| 7496 | 89 | 16 | 851  | CCCTACATTTACCACAGCAAGGCTAGCAATCCATTTGTAAACTTGAAGAAAGAGTAC    | 7112 | A_95_P218542 TA21200_4097 |
| 7501 | 89 | 21 | 642  | AACGAAATACTTGGTGGCGCCTATGGCGTCTTTCTTATATTCCTGATTTTACGATT     | 7120 | A_95_P048081 BP131816     |
| 7502 | 89 | 22 | 437  | TACGGTGAAGGAATCTAACAATGTGCAAGATGCGGACAATCCCCTCTAAAAGTCCAC    | 7122 | A_95_P113307 CV021104     |
| 7504 | 89 | 24 | 750  | TTGGAGCTTAGTATTAGGATTGTGGTGCCTTAGAAGACTTGTGCCTTGTATTATTCT    | 7126 | A_95_P135407 TA14351_4097 |
| 7508 | 89 | 28 | 734  | CTAGTTGTCTGGGTTTACATGTTAGTCCATAACAGTACAAGTAACTACGATTTGAGT    | 7134 | A_95_P149707 EB679630     |
| 7510 | 89 | 30 | 456  | CAATGGTTGGCTTCTGATGCACCTCCTTATGAGTTATCAGTTTCACTTGATGGTTGTA   | 7138 | A_95_P052251 FG639495     |
| 7513 | 89 | 33 | 568  | GCTTGATCATACATGTTTCTCCACTTTGGATATTTAATTATCATATACTCCCTCCGTTCA | 7143 | A_95_P006696 TA15575_4097 |
| 7514 | 89 | 34 | 738  | ACATGTTTCACTTGCCGTGTATAGATACATGGCTGTTGAAACATGGCTCGTGCCCAAT   | 7145 | A_95_P295023 EB443550     |
| 7520 | 89 | 40 | 846  | CTTGGTACAAGCGGAACAAAGGTCCATAGCAATGTTCAATCTTCAAACATTTTTCAA    | 7157 | A_95_P008896 DV159843     |
| 7524 | 89 | 44 | 964  | GCATCAAGAGAAAAGATTATCCACATATTTTCAGTATACGAACATCACATGAATGATC   | 7165 | A_95_P010471 TA17261_4097 |
| 7526 | 89 | 46 | 525  | AGAGTTGATTTTCTTCTGGCCCAAGTCCCTTGGCATATTAACATAACCAGGGGTTTCTT  | 7169 | A_95_P074775 BP526555     |
| 7527 | 89 | 47 | 795  | TTAAGCGCGTGAAGAGGCTTCCAGATTCGCGATTTGAACATATCCGGATACCACAA     | 7171 | A_95_P163102 EH622089     |
| 7533 | 89 | 53 | 685  | CTATTATCAATCAATGAAACCCCTTGTTCGATTTTAAAACAACCCACATGACGACAC    | 7183 | A_95_P019151 TA12698_4097 |
| 7538 | 89 | 58 | 791  | ATCTTCTCATGCACTATAGCCCCCTTCGTGGTATCAGGTATTTGCATCCTTTCAAGTT   | 7193 | A_95_P117502 DV160431     |
| 7541 | 89 | 61 | 489  | TTGAAAGCAGCTTTTTCAAGTGTCAGTAGCGGGACGTTCTGTCAATCGGGGAAGGTT    | 7199 | A_95_P275673 AM803681     |

|      |    |    |      |                                                               |      |                           |
|------|----|----|------|---------------------------------------------------------------|------|---------------------------|
| 7544 | 89 | 64 | 1155 | TTTGACTGATGTTGGCCATATTCCTACTGGGTAAATGGCAGTTACTGCCTCACTTTTTCA/ | 7205 | A_95_P185202 TA13862_4097 |
| 7549 | 89 | 69 | 489  | GATTTTATATCATGTCTACGTACGGAGTGATGTTGCAGCGGGATCAGATATCCCGTC     | 7215 | A_95_P051196 BP132586     |
| 7550 | 89 | 70 | 724  | CTAGTAGTGGCGTATGAGGATGTTTTAGTTCTCATTTTGGCTATCAGATCAATTCAT/    | 7217 | A_95_P190007 TA14912_4097 |
| 7551 | 89 | 71 | 807  | CCTATAGCTTTTTGTTAGGATAAAAAACGTTGAAGACTTTTAAAGTGGTCAGGTATGTC   | 7219 | A_95_P009201 DV162419     |
| 7556 | 89 | 76 | 893  | TTTATGTGGGTAATCTTGCTCCTCTGGTGACACAACCTCGATCCTCATCGCCACTTTTAT  | 7229 | A_95_P259026 DW001309     |
| 7563 | 89 | 83 | 1044 | TAATTGAGATTAAGGTTCTCTCCCCGTAATGATTTGGTTAAAGTTGGTGATGTTTCTC    | 7242 | A_95_P178522 TA12270_4097 |
| 7566 | 90 | 1  | 679  | AACAGTCAAACCTATGTGGGTAGTCTGAACCTTGATGCGAGCTCTCAAATCTATCTCTA   | 7083 | A_95_P029386 TA13901_4097 |
| 7571 | 90 | 6  | 832  | AAAGCAATTAACCTGGGATCGCGCTGAGATGTAGAAGTCTTCCAGTCTGCAGCAGATT    | 7093 | A_95_P243067 EB451275     |
| 7572 | 90 | 7  | 1015 | TGTAATCAGTGTGAGAGAGATCACCAAGGACTTTGTTGGTGGGCAATGTTTAGAGTC     | 7095 | A_95_P014841 TA13035_4097 |
| 7575 | 90 | 10 | 646  | AGTGTATAAACAAGTTTTGCTCGAGGTCATTGAGTTGATCATCTGTCTGAATAAGTC     | 7101 | A_95_P024281 DW004487     |
| 7578 | 90 | 13 | 1161 | CAAATGGGAGGACATCAGCTCTTTGTTTGATCTCTCAAACCTATTATCTTAAATCACC/   | 7107 | A_95_P005121 TA11995_4097 |
| 7579 | 90 | 14 | 132  | TTGGCTATTTAGTACTGTGTTGATATGATTGAGTCCTGTTTTCCAGGTTGAGATTGC     | 7109 | A_95_P150750 EB680873     |
| 7581 | 90 | 16 | 850  | GTAGGCTAGCTTGTTGCTTTGGTTTAAACCCAGCAGTTAAAGTGACCTCAAACGAAA/    | 7113 | A_95_P199317 TA16969_4097 |
| 7586 | 90 | 21 | 845  | GGCTTCGCTCCCTTTGCTAAATAACTCATTTTTCAATGCCAATAGTTGTTTCATATGTCAT | 7121 | A_95_P116992 DV159764     |
| 7588 | 90 | 23 | 551  | ATTACTCAGCCAAACAATTGAATTGCACTGCTTGCAAAAGCCCCCTCTGGGATGTTATC   | 7125 | A_95_P212437 TA19836_4097 |
| 7589 | 90 | 24 | 856  | TTTTGATCCGCTGCCGTATGTCAGTCAATGATATTGTAAGAGCAGACTGCACCTAAG     | 7127 | A_95_P310943 FG162423     |
| 7590 | 90 | 25 | 918  | GTGACTTATGCAACTTTGTAAGGTGTTTGCTGAAGTGATATCACTCTGTATTTACA/     | 7129 | A_95_P181747 TA13053_4097 |
| 7593 | 90 | 28 | 925  | TCTGATCGGGGGCTTTGTTAGGACCAGCTTAAATTACTACTGGGTTTTCTTTATCCC     | 7135 | A_95_P230704 DV157855     |
| 7601 | 90 | 36 | 847  | GTGACTATCATGCTTCTCTTGCCACCTAATGAAGGCTATCCTGGAACACCTCCAGTTGT   | 7150 | A_95_P216857 EB441655     |
| 7606 | 90 | 41 | 777  | TCACTAAAGCCTGAATTTATTGATATCATCAAGTCCGCAACAGTGAAAAACAAGTGGT    | 7160 | A_95_P148152 EB677365     |
| 7610 | 90 | 45 | 836  | GAAAAGTTTTACTGTTCCGGTCATGTTGTTGCGCCAGTTATATGCCATGTGATTATT     | 7168 | A_95_P208772 EB449346     |
| 7613 | 90 | 48 | 678  | TCACTCAGTTTTCTTTGTTAATGGAGGCACATTCTCCCTGAGCGAGACCATTCAATTTGT  | 7174 | A_95_P288803 FG199314     |
| 7614 | 90 | 49 | 153  | TTAGGCGCAAGACAGATACTTTCCATCTTATTTAGCTTCTTTGAAAAGCTGCTTTGC     | 7176 | A_95_P132782 EB433496     |
| 7621 | 90 | 56 | 835  | CTTGTATTATCCAACCTGCAGTGAATTTGATGAAGGTTGTTCCATGGTGGTTTAAAG     | 7190 | A_95_P177952 DW002580     |
| 7622 | 90 | 57 | 218  | GGTAGCTTATGGAAGATGCACCACTGGAATGAGCAACGAAAAGTTAGGTCCATTTTA     | 7192 | A_95_P110847 TA12840_4097 |
| 7625 | 90 | 60 | 856  | TGGATACATGCTTAGTCCGGATCTGCATAAGTTTTGTTTTACATTTATCTGTGTTTTGG   | 7198 | A_95_P241180 DV159117     |
| 7627 | 90 | 62 | 773  | GACTACTAGTTTTGTTGTTGTGTATCCTAGTAATCAAGCAATGCTCTGTCTCTTGTA     | 7202 | A_95_P177532 TA12000_4097 |
| 7630 | 90 | 65 | 500  | ACAAAAAGCACATATCTACCAAATACTTCCACCTTGTTTGCAAAATTTGTTGAGGGGAA   | 7208 | A_95_P081860 BP528370     |
| 7639 | 90 | 74 | 557  | CCAAGTCTGGAAGTGATGTACTTGCAATTTATGGATATAGTAGACAAATACATGTCC     | 7226 | A_95_P024866 TA21691_4097 |
| 7641 | 90 | 76 | 1236 | GCGTTCGGTGCTTTACCTTCATATGTGAAGCTACTCTTTATCGATTAATTTATTTATCCA  | 7230 | A_95_P193667 TA15720_4097 |
| 7647 | 90 | 82 | 770  | ATCTCATCAGATGCCTCTAAATTTATAAGATGCAGGCTTGAGAGCATAGCCTACATC     | 7241 | A_95_P298333 FG168498     |
| 7649 | 90 | 84 | 0    | TTCTTGAGATGGTCATCCGATAGGATGTGCCCATCATATGCAAAAAATATGGGACTTT    | 7245 | A_95_P297983 A_95_P297983 |
| 7650 | 90 | 85 | 164  | GAATAAGAGACTTCTGAATATTACACCAATTGACAGTTTGTATGCATGCGTGATGT      | 7247 | A_95_P034424 AJ718733     |
| 7655 | 91 | 5  | 613  | TTGCAAAAGTTTTTCATTGCTCTGAAACTTCTGATTCTATGAGAAGGCCTGAGTTATT/   | 7256 | A_95_P153107 EB683431     |

|      |    |    |      |                                                             |      |                           |
|------|----|----|------|-------------------------------------------------------------|------|---------------------------|
| 7656 | 91 | 6  | 537  | TTTCCGTTTGAAATTAAGAGAGGGAATCCAACCCGGACTTTCTCCGCTTTTTTACTTC  | 7258 | A_95_P053261 BP133131     |
| 7657 | 91 | 7  | 466  | TAACTAGATTTGCAGGTGCACTTGGCTGCAAAAAAGGAAAGGCTTGTTAATAATAAG   | 7260 | A_95_P006986 U95924       |
| 7659 | 91 | 9  | 585  | GCAGCGCTTTTTCCCTTTATTTGGGATCCCAAATACATCATATAAATACTTCTTCTC   | 7264 | A_95_P026046 EB445471     |
| 7661 | 91 | 11 | 764  | ATGACATCTGCTCTATCTAGCCAGCAACTTTCATCTTCATGCTCTGCAGTTGATGTGG/ | 7268 | A_95_P096473 FG153654     |
| 7664 | 91 | 14 | 350  | GGTTTCCGATGTTAATAACCACTCTTTTTGCTTGCATATGCTATTAACGTATGTTCT   | 7274 | A_95_P125897 EB425028     |
| 7666 | 91 | 16 | 374  | AGTGGTGAAATCGCCTTGATTACATTTCTGTGTTGGTCTTTCTTTTAGCTTTGTAGAT  | 7278 | A_95_P133312 EB434716     |
| 7668 | 91 | 18 | 819  | TACGGAATTCGTAGACTACATAGTGAGGTTGGTTTGTAAATGAACAATGACTGGTGAT  | 7282 | A_95_P269736 EB426391     |
| 7669 | 91 | 19 | 1279 | GCATATCTTGGAGATTGATTGGATTTCTATTGTTCCAACCTGTGTATTTCCAGTCATA  | 7284 | A_95_P197192 TA16509_4097 |
| 7672 | 91 | 22 | 606  | GCAAAACATCCTACATTTTCTTCTTTGCTTGGGGGAAGCTTTAAAGAAATTAGGATT   | 7289 | A_95_P212657 TA19882_4097 |
| 7677 | 91 | 27 | 1577 | TGAGCATGTCTCATTTTTGACTGCTGTTCTGCAACTTGTATGCATTTTGTAGTAT     | 7299 | A_95_P108912 TA11833_4097 |
| 7680 | 91 | 30 | 723  | TTTACTAACTTTTGACAAGCCAGCACCATCGCACCTTGACTGGCAAGTTGGACATGT   | 7305 | A_95_P298583 EH623389     |
| 7688 | 91 | 38 | 800  | ATTAGCCCGAGAAATTATGCCATGTCACCTGGAAGTTATGTTGGATCTGCTTACCCAC  | 7321 | A_95_P021371 DV161271     |
| 7691 | 91 | 41 | 776  | ATCAGAAGGCAGGCACCTCTAGGATTTGGATAACTAGTGCGATCTGGAAAGAGCTA    | 7327 | A_95_P295743 EB447894     |
| 7692 | 91 | 42 | 449  | AGGTTAATGAGGTAATTTTTACCAGTAGATGATGAGAATGCTGTAAAAGGAAACAGC   | 7329 | A_95_P159687 FG144962     |
| 7697 | 91 | 47 | 758  | TTGATGAATGCAGTTTCATTATCAGCATTCTGTGCTGCTGTTCCGCGAATTAATGC    | 7338 | A_95_P012481 DV160348     |
| 7698 | 91 | 48 | 620  | ATATGCACCTCATGTAGCATTTCTACTGCCTTTCATTGTACTTGTCTCTGCCGTT     | 7340 | A_95_P063870 BP135895     |
| 7701 | 91 | 51 | 352  | AAAGGGTTTCTTTGGGGTAATTTAGAGGGGAATTTGCTTGGGGTTTGAACAATTC     | 7346 | A_95_P095728 BP533307     |
| 7702 | 91 | 52 | 638  | TTTTTTGATGATGAAAGGACAGTGTATCATTGCCGTTCTGCAATTTATGCCGGCTGG   | 7348 | A_95_P137177 EB440893     |
| 7707 | 91 | 57 | 724  | CCTTAGCCCGTACATATAATAAAGGTGCAGGTTGTAACACCACCTGCCTACTCAAAC   | 7357 | A_95_P025181 EB679218     |
| 7712 | 91 | 62 | 271  | CATTTGTGCAAGGACATGAATTCATGGTGAGCAAAAGTGAAACACTACCAACCTTT    | 7367 | A_95_P143462 EB446757     |
| 7713 | 91 | 63 | 756  | TGGCTGGAAGCAAGCTGCGCAAATTTGGATATTAGCTGGTTTTGTAAACTTGTATAG   | 7369 | A_95_P128372 EB428069     |
| 7715 | 91 | 65 | 760  | CATGGAGTGTCTGACTTTTTGCATGAACTATCTGTTTTAAGGGCGTTGAGTGATTCT   | 7373 | A_95_P009216 TA16854_4097 |
| 7717 | 91 | 67 | 426  | TCTGACTAATGCTTACATTTAACTTGAAGCGTGTTTCATATGTCCTTTCATCCTAAA   | 7377 | A_95_P001506 TA19130_4097 |
| 7722 | 91 | 72 | 549  | CCCAGATGGACTAATATTTGTTGAAGAACTTAGAGATGAAGAAGATAGAGAATTAC    | 7386 | A_95_P059680 BP134799     |
| 7728 | 91 | 78 | 550  | GTTCTTTTTCTGGTAGATGTGTTGTTTCTCATGAATATTGGCAGCTAAATATCGGATG/ | 7398 | A_95_P035213 BP128407     |
| 7732 | 91 | 82 | 794  | CAATTTCTACTTTCATCTTTGTTTTCAGGATTGTTGTGTATAGTGCAGTTGCTTTCTTG | 7406 | A_95_P198647 DV999246     |
| 7733 | 91 | 83 | 629  | AGTCAGTTGCCTGCAGAAGATTGCCTTTGTGAGATATGCACCAATAGAAAGGGATT    | 7408 | A_95_P138207 EB441955     |
| 7734 | 91 | 84 | 701  | GCAGAAGGCCCTGCTAACTGCTTTATATGCTACGAGCCTCTTACCAGTTTGTAGTTTT  | 7410 | A_95_P146082 EB449944     |
| 7736 | 92 | 1  | 353  | CACAATAGTTCATTATACCTGAGTAAAGAGGTTTTGGCAGTTGCTTTTTTGTCTTTC   | 7249 | A_95_P028671 BP531178     |
| 7738 | 92 | 3  | 428  | GTTCTTAGTAGTTAAACCAAACGACCCCTTGGATTTATATAGACATGGTCGCATTGA   | 7253 | A_95_P211182 TA19555_4097 |
| 7739 | 92 | 4  | 890  | TATTCTTTGCTTCTGGGTGATTGTTTACCTTTACCCCTTCTCAAAGGTCTCATGGGT/  | 7255 | A_95_P187142 DV161313     |
| 7746 | 92 | 11 | 479  | GGTGGCTGGGTTGAGTATTAGTTGCAAGTTACACTATTGTAGTTCTCTGTTCTCAAC   | 7269 | A_95_P184327 BP530524     |
| 7748 | 92 | 13 | 1194 | GAAGCCACTGTGTTGCAGTTGTTAATGGGATATAAAAATAAATCCTTGTATACGATT   | 7273 | A_95_P016196 TA13049_4097 |
| 7750 | 92 | 15 | 754  | GACTAATTGTTGAGTGTACCAAACTAGTGTGGCAGCATATGTTTACCTTTAGCTTT/   | 7277 | A_95_P273681 EH618301     |

|      |    |    |      |                                                              |      |                           |
|------|----|----|------|--------------------------------------------------------------|------|---------------------------|
| 7752 | 92 | 17 | 233  | TACCTAGGTCAGTTTCAGTTGTGTCTTTTTGTACAAGGGATACTTATTTGCTTATCAG   | 7281 | A_95_P098773 BP534635     |
| 7756 | 92 | 21 | 492  | CCTGTAGACATGACAGATTCTTCAGTCTTTGCTTTACTTCGCTAGAATTCATTGTTAA   | 7288 | A_95_P122797 DW002756     |
| 7757 | 92 | 22 | 778  | AAAGAGGATAGAGAAGGCCAAAGTTGCTGTTTTCGTTCAAGGCGTTGATACATCTG     | 7290 | A_95_P139087 EB442787     |
| 7759 | 92 | 24 | 802  | ACGAGTATAAAGACGCTCGCTGCATATAAATATGGTAGTGTCTAGTGTAAATACGA     | 7294 | A_95_P188167 EB679714     |
| 7764 | 92 | 29 | 317  | ACTGATACAATTTCTGTGATTTCAACCCTTTAGTATTTTCAGTTCCCCCTTCCCTAGC   | 7304 | A_95_P133502 EB435068     |
| 7771 | 92 | 36 | 465  | CTTTTCTTATTGCTTGGCTTGTCTTAAGAAGTAAACTCAAAAAGAACCCCTTTGATTTA  | 7318 | A_95_P091513 BP531390     |
| 7777 | 92 | 42 | 0    | ACAGGGAAGTGTAGTGTATATAGCTCTTACTCAGCTGTTTGACATCTAACTTATCC/    | 7330 | A_95_P029646 A_95_P029646 |
| 7781 | 92 | 46 | 629  | GCACAAATTCACATAAGCTCCCCTCTTTGAGAATTGAAAACTTCAGTTTCTTGAACC    | 7337 | A_95_P063780 BP135872     |
| 7783 | 92 | 48 | 559  | GAGAAACCGCGGAGTTTACTGTAGTTTTCTTCCCGAGCCAGTAGAGCTCGAATTTTT    | 7341 | A_95_P219417 TA21391_4097 |
| 7785 | 92 | 50 | 834  | TACAGGAAAGATCCAAGAACTGGAGGATTCATTGACAGCTGCACAGAAGCTTACA      | 7345 | A_95_P229999 EB438987     |
| 7788 | 92 | 53 | 360  | TTTAGATATTTGGAGCCTTTGTTCTGCATACAAAGAGCGGGCGGGAATGCTTCCGAA    | 7351 | A_95_P119422 DV162630     |
| 7790 | 92 | 55 | 900  | GTTCTCTATTGCACTCCCTAAATAGGGTTCTTTTACCTTTCCCTCACGGTACTTGTAC   | 7354 | A_95_P176613 TA11663_4097 |
| 7792 | 92 | 57 | 951  | CGCATAGCTGCTGCTCATTGGCTTTTTTCTTAAACAAGTTTTGTGCATACAGTTTAT    | 7358 | A_95_P223407 TA22245_4097 |
| 7794 | 92 | 59 | 826  | TGGTAGTTTTATCTTCCCTGGGGCTCAGCATATCACATCGTCACTTCTCTGAAGAAGT   | 7362 | A_95_P247832 FG142227     |
| 7797 | 92 | 62 | 568  | GGATCCATTTCTGCTTTTCGATGAACCAATGGCAAAGCTCAGAGTTTATAATAACATA   | 7368 | A_95_P291313 FG639427     |
| 7798 | 92 | 63 | 482  | GTTGTCGTTCTAAGGTCTCGATATTGTAATTTCTCATTGCAGATTCAAGGAACAAAG    | 7370 | A_95_P004161 TA12412_4097 |
| 7800 | 92 | 65 | 629  | CTCCATTTATGTATGATTTTCACTACTTTGTCATGGTACGGAGGTTTGAATTAGGTAA   | 7374 | A_95_P108482 DV999474     |
| 7806 | 92 | 71 | 1590 | TCTCATTTCTCTGTATTGCATATGGACATGTAATCTTGGATATATGGTTTTGGCAGC    | 7385 | A_95_P188147 TA14505_4097 |
| 7807 | 92 | 72 | 332  | ATAGATCCAAATGTGCTGCTATCACAAATGGAAGATAGCAACTTGATGATTTTTTCT    | 7387 | A_95_P314428 FG170087     |
| 7808 | 92 | 73 | 787  | TAAAACCTTGCTCACATCTTTGTCAAGTCATGCGAGTTGGGTTTTGAGTGTGGATGTC   | 7389 | A_95_P293243 EB431978     |
| 7814 | 92 | 79 | 1309 | ATGTACAAGTGTGGGGAAGTAACAGTAATATGTACACCAATGGAGCTTTTCCATAAA    | 7401 | A_95_P253784 AB031321     |
| 7816 | 92 | 81 | 614  | TTTGCTGTAACACAGCCGCAAAATTTGCAGATTCTTAGCTGCTATTGTTTTCTTTATAGT | 7405 | A_95_P271341 EB442156     |
| 7818 | 92 | 83 | 868  | CTGTGGATATATCTCCTAACCTGGACGTTCCGGACCCCATGTATATAGTATATTCCAG   | 7409 | A_95_P201472 DW000412     |
| 7820 | 92 | 85 | 395  | AAATAATGTCTATCCATCCGCGAGGATCATCACATTTGTTGAATTGTCATTAGATGTC   | 7413 | A_95_P106577 TA12334_4097 |
| 7824 | 93 | 4  | 0    | GGGTCTTGTGGGTGAAGTTTGCAAAGAGAAAAAAGTCTAAATAGTCACTGGATTA      | 7420 | A_95_P010816 A_95_P010816 |
| 7825 | 93 | 5  | 2054 | TCCCAGTTTTGTAAAAGCCAAATAATGTTGAGAAGTTTGTACCTTTGAGGGTCTGTTG   | 7422 | A_95_P014831 TA15521_4097 |
| 7829 | 93 | 9  | 848  | AGAGTACATGCAGCTGTTTCGCGATGGCTTACTAGATGTTTCAGCAGAGTTGCTTCTA   | 7430 | A_95_P231689 FG163124     |
| 7830 | 93 | 10 | 254  | GCTAGCAGTGTGGCCATTGTACTCTATTGTAACAATATGTTTTACAGATAAAAACCATT  | 7432 | A_95_P144942 EB448503     |
| 7833 | 93 | 13 | 797  | AATCTTCTTTGAGGTTTCTGGTTTTTGTGGCAACACTTGTGATAAAGAATCTATTGG    | 7438 | A_95_P176712 TA11739_4097 |
| 7835 | 93 | 15 | 1045 | CAAAAATGATGACGGGTACCCTGTATTCTAAGACTTTAGATGTTTCACTTGAGATTTT   | 7442 | A_95_P180627 TA12791_4097 |
| 7840 | 93 | 20 | 787  | GTGGAACATCAGGATTCTAATCACTTACTTGACAGGTGACATCATTCTCATGGTATTG   | 7452 | A_95_P120337 DW005082     |
| 7841 | 93 | 21 | 638  | GAATCTGCCCGTTTCCGATACTGAATCCATTCCACATGTTTCTGTGATTTAAGTTTACA  | 7454 | A_95_P178227 EB439272     |
| 7842 | 93 | 22 | 722  | TATAAAGGCAGCCAATACCACCAGCAAGGGGACTTTCAATGAACCTTGATAGGTTATC   | 7456 | A_95_P164717 EH624024     |
| 7844 | 93 | 24 | 859  | GTGGGCTCTTCAAATTTTCAATTTTGAATGCACCTTTGTTGTAAGCCATTCTTCTGATG  | 7460 | A_95_P265316 EB679991     |

|      |    |    |      |                                                             |      |                           |
|------|----|----|------|-------------------------------------------------------------|------|---------------------------|
| 7845 | 93 | 25 | 566  | ACCTGACTGGAGAGGTTGTTTCCTCTTTCCAGTTCAGTGATACTTTAATGCATGGTAA  | 7462 | A_95_P001141 TA15333_4097 |
| 7847 | 93 | 27 | 1516 | AACAATGTAAGCAAACCTCATAGCTCTGCGGTGCGCAAATCTGCTTGCTAGTTTATTTT | 7466 | A_95_P015926 AY429423     |
| 7848 | 93 | 28 | 773  | GTGCTAGTCTTGCCAGTACATGTTTCATCTTTTAAACAAGTTATTAACCTCGAGAATGT | 7467 | A_95_P144577 EB448030     |
| 7852 | 93 | 32 | 493  | AAGCAGATTGTCATGAATGGAGCAATGGGGAAGAAGTACGAAGCATCCTACTTCAG    | 7475 | A_95_P139477 EB443235     |
| 7853 | 93 | 33 | 953  | CAGTTTTGGACTCGATGTTTCTATTTGCTTAGTGATGCCATTTTTATTATGCGCCTTTT | 7477 | A_95_P000466 TA12129_4097 |
| 7855 | 93 | 35 | 485  | CTTGATGCGTCATTAGCACTTAGTTTGTATGAGCTTTTAGCGTAAATGATCCTTGTTA  | 7481 | A_95_P153602 EB683840     |
| 7856 | 93 | 36 | 295  | ATGGTTAAGCAAAGCACGGTTATGCTCTTGATCGCATGTGATCACGGAGCTCAAGGA   | 7483 | A_95_P040816 BP129931     |
| 7857 | 93 | 37 | 1114 | GTATCAATAGAATTTCTGTATGAATCTTTGCTTTTACATCTGAAGGACGTCGTTCACT  | 7485 | A_95_P191592 AB281271     |
| 7858 | 93 | 38 | 365  | AAGGAATTTAAAATGAGCCCTGATGTTTCCGTTCTGATCATGTACACCTCTTAAAGA   | 7487 | A_95_P114242 CV021514     |
| 7859 | 93 | 39 | 279  | AGCTCAGTTGTTTTGGTAATGTTTGTGTCATGTGCGTTCGAGTAATTTTGGTATTAT   | 7489 | A_95_P100933 BQ842950     |
| 7860 | 93 | 40 | 674  | ACAAAGTTGCTCGAGAATGGCTTTTTGATGATTAACATGTTGAAATTTTCACTGATTG  | 7491 | A_95_P273151 EB681910     |
| 7861 | 93 | 41 | 451  | CTGTCCTAGTGTGTTGGGCGTTCTTCTTCTTTTTCGCTTTATGTGACATTGTATCTC   | 7493 | A_95_P290363 FG635220     |
| 7867 | 93 | 47 | 547  | GATTCCTAAACGACTATTGATCTACTTCTATTTGGTTTACTGCGATGCAGAAGAACA   | 7505 | A_95_P028376 EH618209     |
| 7869 | 93 | 49 | 805  | CACATCTCCAGCCTTAGCTAGTGTGTATAGTAATAGGTTTTTCTTCTCGTTTCATTCT  | 7509 | A_95_P014571 TC47385      |
| 7872 | 93 | 52 | 722  | ATAGCTGATTTCTGTTATATCATCAAAGCGTCAATCATATTGCCTCTGTGTTATTTA   | 7515 | A_95_P214063 TA20180_4097 |
| 7874 | 93 | 54 | 717  | CGTGTCTTGAAATATAACCTAATGTCCAGTTACCCTTTAGATGCAAAGTTAGAATTT   | 7519 | A_95_P135427 EB438874     |
| 7881 | 93 | 61 | 765  | TTTGCCTATCTCAAGATATACAGAAAGTACTTCCAGCACTTACTAGGAGAAGTGGTC   | 7533 | A_95_P296203 EB450783     |
| 7884 | 93 | 64 | 690  | TGTTATTTATCAGTGGATAGGTGTGATTTGTAATGTGTGGCCTACGCTGCATTGCCG   | 7539 | A_95_P192252 FG150164     |
| 7885 | 93 | 65 | 705  | CATGTTATATTGGGTGTAGATCCAAGAAGCTCCTTTTGCCTAGTTCTTATGAGTTAAT  | 7541 | A_95_P162287 EH621216     |
| 7889 | 93 | 69 | 479  | AGTTCTTGCACTTACATACTATCATGCTGCTGACGTTTCTTCTGATTTTGGTCTGTG   | 7548 | A_95_P005911 FS407121     |
| 7894 | 93 | 74 | 655  | AGAGAAAATAATTCATGGGAAGCCATCTGGTATTGACAACACAGTGAGCACGTATGC   | 7558 | A_95_P136597 FG134879     |
| 7895 | 93 | 75 | 5    | TTTTGAGCTAAGTTTTTGTGGAAATGGCGGAGTAGTGAAGCCCTAGCTTCCGATCTC   | 7560 | A_95_P046091 FG139803     |
| 7897 | 93 | 77 | 482  | ATGTGAATGCTATTGTTGCTTGGCTTCAAAGAAGAAAAGTTTACTTGAATGAGTGTG   | 7564 | A_95_P023336 TA13918_4097 |
| 7900 | 93 | 80 | 1168 | GATATTCCAGTAGACAATAGACGGAGATCAGTTATTGCATTTTTGAGTGTTAATGTG   | 7570 | A_95_P219542 TA21418_4097 |
| 7901 | 93 | 81 | 635  | TTGCCATAAATGTGATCATATCCAGTTCGTCATGTTTGTGACAGAAATGTGAAACAT   | 7572 | A_95_P015391 EB439146     |
| 7908 | 94 | 3  | 880  | GAAAGGACTTATGTTATGCTATTCTGTAATTTTGGTCACTTTCTACTCTGCTTCTGTT  | 7419 | A_95_P218502 TA21190_4097 |
| 7909 | 94 | 4  | 515  | GTTGGTATGTTTTGGTTTAGGAATCATTATGGATTTACTGCTATCTGAGAAAGTTTT   | 7421 | A_95_P016886 EH619999     |
| 7920 | 94 | 15 | 352  | GTTGTAGAAGCATCTTACTGATCCCTGAACAATTTTGTAGATTCAAGTCAAATATAGT  | 7443 | A_95_P308683 FG643244     |
| 7921 | 94 | 16 | 832  | GCTATACACATGATTTAGTATAGACACTTGTTCATGATGTGCTTGGTTTGAAGATTGA  | 7445 | A_95_P309788 FG172993     |
| 7922 | 94 | 17 | 752  | ATGACTCTTATAGGGAGAATGCTCGATATCTTGGCAGTGGAAAGGGATCATGGGTATC  | 7447 | A_95_P148062 EB677243     |
| 7924 | 94 | 19 | 704  | TGTGCACCATCCTTATTCATGTTACGGACATTTTCTTGGATTAATACATCACTTAGAA  | 7451 | A_95_P256339 FG635761     |
| 7925 | 94 | 20 | 2800 | ACGACCAAGAAGTTGCTGATTGCATGCAGCCTTCTGTAATTTTACAGGGGTGAGATTG  | 7453 | A_95_P034673 AY219234     |
| 7926 | 94 | 21 | 711  | TTTGTGCTAATGTTGCAGTAGCTCTCAAATTTGGTCTTATGAGGTATTATAGAACGG   | 7455 | A_95_P119367 DV162534     |
| 7928 | 94 | 23 | 709  | TGTCAACCTTTGTTCTTGTGTAAAAGTCTGTACATGGTTTTGATATCTTTTCTAAGC   | 7459 | A_95_P149667 EB679586     |

|      |    |    |      |                                                             |      |                           |
|------|----|----|------|-------------------------------------------------------------|------|---------------------------|
| 7929 | 94 | 24 | 1062 | TGTGCACTGGATATATCAAATACATCTGAAGTAAAACCAACAATGGTAATCAAGCT    | 7461 | A_95_P009101 AB119470     |
| 7930 | 94 | 25 | 221  | CCAAGCCCAAGTCTGAACTACCTTTTCAATTAATGTTCTAATGGTTAAAAGGAGTTA   | 7463 | A_95_P004291 EH616725     |
| 7936 | 94 | 31 | 796  | TATATGTTGCTTGCTGGAAATGCACCACCTGTTACGCCAAGTGCAACATCTGCTCTAT  | 7474 | A_95_P292923 FG159197     |
| 7937 | 94 | 32 | 425  | TGTGTAGCAAGAAATAATCTTTTGGCTCTTCAAGCATCTCCCGGTCTTTCTGCTTGA/  | 7476 | A_95_P308958 FG644183     |
| 7938 | 94 | 33 | 569  | AGGCAAAATTGGTTTTGGGTTGTGTTACTGTTGCACCCCGCAATATTACGTCAATATT  | 7478 | A_95_P182652 TA13269_4097 |
| 7939 | 94 | 34 | 74   | GAAAAGGGTGAAAAATCAGAAATTGGAGAAAAAGGTTCTAGGGTCTTTTTCAGTTT    | 7480 | A_95_P097453 FG624638     |
| 7941 | 94 | 36 | 828  | AAATGAAAGATTTCGTGAGCTCACAGAACAATCTGCACCATCATGCTGCTTTTCCAGAC | 7484 | A_95_P298348 FG159026     |
| 7942 | 94 | 37 | 384  | AGACATCTGCACAAGAGTGACTTGAATGTTCTTAGCATTCTATAGTAATTTAGCAGC   | 7486 | A_95_P076640 BP527040     |
| 7945 | 94 | 40 | 1313 | TCTGCCCTTACAGTTTGTGCTGATTAGGCATTTGAAATGTTGCCTTAATTTTGGAGC   | 7492 | A_95_P191487 TA15247_4097 |
| 7946 | 94 | 41 | 350  | ATTTAACCATATCAGGAGAAGATGGTCAAAACACAGGCAACTTTATCACGGACCGAA   | 7494 | A_95_P105472 CV017477     |
| 7950 | 94 | 45 | 468  | CTCATCTGAATTTGGTGGCTCCTTATGTAATGAACATCTTAGAGGATTCTATGATCTC  | 7502 | A_95_P180137 TA12669_4097 |
| 7951 | 94 | 46 | 466  | TGATATACTTACCACTGTTTATGTGGTGATTTGATAACGTGATTAGGTGCATAATCAC  | 7504 | A_95_P024976 FS390471     |
| 7952 | 94 | 47 | 652  | CTCTATTATCTTTTCGCGTGTCCAATTTTGGTGCTTGGATATTTGTTCTTGTAGCTA/  | 7506 | A_95_P141467 EB445181     |
| 7953 | 94 | 48 | 907  | AAGGGTGTACCTGATAAGGGCATCTGTTTTGCTCCTTGTGGATTAATATTTAAAAC    | 7508 | A_95_P004086 TA12324_4097 |
| 7954 | 94 | 49 | 432  | GTTCTGAATATCTTTGTAGTGTCCAATGCAGAATAACTATAATTTTGCCTAGCGGC    | 7510 | A_95_P276788 AM841116     |
| 7958 | 94 | 53 | 727  | ACAAGGGGTGTGATGTAGGCAACCTACCCTTATGGTTGAAGTATTAGTGGTTGATTC   | 7518 | A_95_P147667 EB452184     |
| 7961 | 94 | 56 | 138  | CCTGTGTTGTACGTACGCCTTTGGAACATTTTGGCTTAATTTAATACAGTGGTATCTC  | 7524 | A_95_P098513 BP534515     |
| 7964 | 94 | 59 | 866  | GCTTTTGCCTTGTATAATCTACTATGTCTATTTGTGCTGCTGTTTGTATCTTAAAGCT/ | 7530 | A_95_P182797 DW000146     |
| 7965 | 94 | 60 | 128  | AGGTGTTTTTCTTTGGTCAGTTTTGTTACAAGGTCAAACATTTAAGCACGTACAAGA   | 7532 | A_95_P214367 TA20249_4097 |
| 7968 | 94 | 63 | 70   | ACAGTGATCCTTATGTTGTTGTCCACATGGGTGAACAGCGAGTGAAGACTCAGTTGT.  | 7538 | A_95_P109022 CV019112     |
| 7970 | 94 | 65 | 265  | GGTATGTACATCCAAAGCATTCCACTGACATGAAATAACAAAATCAGAAATAGATGG   | 7542 | A_95_P158667 EH616555     |
| 7971 | 94 | 66 | 710  | GATTACTTGTCTTCTCGGTCACGACTTGCTGTTATTGGAGTGATTGAATTTGAATTT/  | 7544 | A_95_P115797 DV158153     |
| 7977 | 94 | 72 | 315  | GCGTAGGGGTATTCATTGGTTGGTTAATATAGTCGGTTTTAAGATGTTATACCAATA   | 7555 | A_95_P030611 BP527351     |
| 7978 | 94 | 73 | 686  | CTACTGATTAATGGCGATACTAGGCTTACAAAAGATGTTCACTTGAATTGTGACTAG   | 7557 | A_95_P135792 DV999689     |
| 7979 | 94 | 74 | 689  | AAAGAGAATGACCAGCTTGTATATAGATTCTGTGCCGTATGAAATCTGCCCTTTCTAT  | 7559 | A_95_P213332 TA20024_4097 |
| 7980 | 94 | 75 | 375  | TCACCTTTGTAAACCACCAGCACACTAGCGTTGATGAATGATTGAAAGCTTTAGCTTT  | 7561 | A_95_P142797 EB446224     |
| 7981 | 94 | 76 | 635  | TTTTATGCTTTTGTAGAAGAGGGAGCCTTCTCTATTGGAACGCATTATGGTACCCTG   | 7563 | A_95_P028276 TA18172_4097 |
| 7982 | 94 | 77 | 845  | AGCATCTGGAAAATGAAATTTGTGGTGATGGACATTGGAGATGCATATGACATACTT   | 7565 | A_95_P015661 TA15151_4097 |
| 7987 | 94 | 82 | 622  | ATACTGGTTGTTGCCAAATTTCCAAATATGCACAAGGTTTCGATTTTCCGGGATAAATG | 7575 | A_95_P306178 FG634510     |
| 7992 | 95 | 2  | 350  | TTGGTACTCGATTGCGTCGAGTTTTACATAAATAGGCAGTGATTCAGTTGGCCTTCT   | 7584 | A_95_P161752 EH620373     |
| 7994 | 95 | 4  | 818  | GCGTCTAATCTAGGGTCTGAACTATATAATTATGTTGTAATATCTTGGTGTATTGA/   | 7588 | A_95_P272746 EB677863     |
| 7996 | 95 | 6  | 766  | TATGAAAGTAAATGTTGAAGTGGAGAAGAGGCTTTGTTGGCTAGTAATGCTCTCTG    | 7592 | A_95_P221617 EH622008     |
| 7997 | 95 | 7  | 384  | TATGTCGATCAGAATTGGCAATGAATTCAATTAGATGCACTATTGTCTTGTAAACGTC  | 7594 | A_95_P163097 EH622087     |
| 7998 | 95 | 8  | 350  | GTCAAAGGATAAATCAATGCAGGTCTTCGATCAGCGCTCTTGTGGGAGCTACAGG     | 7596 | A_95_P277213 FG625263     |

|      |    |    |      |                                                              |      |                           |
|------|----|----|------|--------------------------------------------------------------|------|---------------------------|
| 7999 | 95 | 9  | 1501 | CCCCGTCTGTAATTCTTGAAAAATTTGTGTATACTTTACGATGTATAGCAGATTGGTC   | 7598 | A_95_P239399 AY220484     |
| 8002 | 95 | 12 | 1411 | CCAGTATCAAACAATCAGATAGTGCCAGTGTATGGTATAAATGAATATAGATCTCTC    | 7604 | A_95_P018926 TA12620_4097 |
| 8004 | 95 | 14 | 260  | ATGCTTGTTCTTATTGTTGTTTTCTGTGTGTATGTATCGTGGCGTAATACAGGTTGA    | 7607 | A_95_P210197 TA19348_4097 |
| 8013 | 95 | 23 | 853  | AACTCGATTATGTCCTTCAACAATCATGGCTCTTGAAGAGGTTGTGAAAAGCTGCAC/   | 7625 | A_95_P258096 EB431820     |
| 8016 | 95 | 26 | 812  | TAGATCTGGATTCTTTGGTGCAGAGAGTTTCAGATCTATTCTCTCAGCGAGCTAGTC    | 7631 | A_95_P229989 FG163770     |
| 8017 | 95 | 27 | 73   | GAGTGATCTCTTTGTCCTGTTGGTTGTTTGAGATTGAATTATAACATGTAGCTGGAT    | 7633 | A_95_P138757 EB442482     |
| 8019 | 95 | 29 | 549  | AGTCCCTAACTTTGTACAGAGCACACATTCCAATTTCTGAATTATACTGAAACATAAG   | 7637 | A_95_P154077 EB684241     |
| 8021 | 95 | 31 | 865  | CAGTCATCAATTTTGGCAATATTATAGCTTCGGTATTCAGACTTCAGTCTCTGTGTGC   | 7641 | A_95_P186292 EB451332     |
| 8022 | 95 | 32 | 626  | CACTCTTCTCTATGATAAGAGTGAGCTTGTGTAAGTGCATGTGATCTTATTATGA      | 7643 | A_95_P026141 EH615198     |
| 8024 | 95 | 34 | 977  | GTTGAGGACCAACGGTCATAGCCACATTTGACCTGTTGCTTCTAGCCCCATTTTGA     | 7647 | A_95_P031701 TC76477      |
| 8025 | 95 | 35 | 405  | GGAGGAATGGTGTAGCCGAGGAGGAGCTCCAAAACATTATTTATCTTTGTTCTT       | 7649 | A_95_P092783 BP531969     |
| 8026 | 95 | 36 | 851  | GTTTAGTATGATGTCTTAAGACTTTGTTAATCATTATCAGCTTTCCTTCACTGGTTCCA  | 7651 | A_95_P178212 DV158570     |
| 8028 | 95 | 38 | 903  | CTGATTGGGCCCTCTCTGGTTTCATTTGCTTTATGATTAATGACTGAAAGATCCAGTT   | 7655 | A_95_P213947 AY029330     |
| 8032 | 95 | 42 | 573  | TGATGGACATTTGTTCTGCTAATTACAAGTCGGACGTTGGAAGTGAAGCGGTTTTG     | 7663 | A_95_P063390 BP135770     |
| 8033 | 95 | 43 | 776  | CGAGTTGTAGTCTTCTGTATTTAGCTACAAATTGTGAGTGTAGGACAATAAATGAA     | 7665 | A_95_P117837 DV160812     |
| 8034 | 95 | 44 | 846  | TTGCTACAGGAGGATATGCTTGCCATGCAGAGGATCAACCAATGGAACCTTGATTT     | 7667 | A_95_P179717 M64261       |
| 8036 | 95 | 46 | 789  | GGTCTACTGGAAATATAGACTGAGTTTCTCAAATGCACAGTCAATAATCAATGGCT/    | 7671 | A_95_P179807 EB677669     |
| 8042 | 95 | 52 | 824  | AAGGGAATTAATTGGAACCTGGAACCTGTAGACCTTACTAGGTTGTTTTCTATTATCA   | 7683 | A_95_P180252 TA12699_4097 |
| 8043 | 95 | 53 | 415  | ATACGAAAGCTTGACAGACAAGTACTGGTCTTCAAGGGTTCCTGGTCTTCAATGCTC    | 7685 | A_95_P002596 CV017816     |
| 8046 | 95 | 56 | 481  | CAGCCGAAGTGATACACTACTAGCTCAAATTGCTAGTATTCTTCTTCTCAAAAAGA     | 7691 | A_95_P263046 AM833705     |
| 8049 | 95 | 59 | 316  | ATGCTGCTATTGACTTGGGGAATGAATTGGTAAGTAGGAAGATTGACTTGGTGTATC    | 7697 | A_95_P163947 FS406206     |
| 8056 | 95 | 66 | 479  | GGTGC GACTGTTTTGCACTCGTATGTTATGTAAGCTTTTACTTGTAATAGTTTTACTCA | 7710 | A_95_P207107 TA18669_4097 |
| 8058 | 95 | 68 | 866  | CCTTAGAGCTGAAAGCCATTTTAACTTCTAATGTGGAATCATAATCGATTCTTTTGC    | 7713 | A_95_P013966 TA14348_4097 |
| 8066 | 95 | 76 | 938  | TGGATCGCGTATTTGAGTTAAGGTGACAATGAATTTGCTTAATATCAGTTCTCTGAA    | 7727 | A_95_P206432 TA18515_4097 |
| 8069 | 95 | 79 | 1365 | ATATATACCTATTGACAAGCTCATAAAGGTGGGCATTTGCTAATATATGGTGTTCAG    | 7733 | A_95_P207392 U81312       |
| 8071 | 95 | 81 | 547  | GTGTGAAGATGTATGCATTGACTACTGAGATGCCAAGGCAAGGTAATAAACCTAGAC    | 7737 | A_95_P057896 BP134333     |
| 8072 | 95 | 82 | 886  | GGTGTAGGAGGAGGGTTAATACTGTTGTAACGTCATTTAATGATTTTCTTTTCTCA     | 7739 | A_95_P007731 EB428028     |
| 8074 | 95 | 84 | 206  | CTACGCTTGAAAAGAAATGTAATTTTTATCCTTTAATTCATGTTCCGGCTGTAGCCC/   | 7743 | A_95_P118237 DV161249     |
| 8077 | 96 | 2  | 599  | TTTGTTCCTGTTAAGTCGTTACAACCTTCCAATTTCTAAATCCATTATGGGAAGTTATC  | 7585 | A_95_P177117 TA11882_4097 |
| 8081 | 96 | 6  | 709  | GATATTGAGGATGGTGAAGACTTGATTGATAAGACAATTTCAACACGTTGGAAGAA     | 7593 | A_95_P161722 EH620360     |
| 8084 | 96 | 9  | 782  | CCAAGACCTCTTTTACCTGTTTCTAGTTCCTATTAATGTCCAAAAGGAACACCTAAG    | 7599 | A_95_P211902 TA19716_4097 |
| 8085 | 96 | 10 | 465  | GAGTGGGTAATCAGCATATACTGATTTCTTTTCTCAATGTTCAATGTATTCTGGATC    | 7601 | A_95_P130562 EB430609     |
| 8088 | 96 | 13 | 428  | AGACCATTTTTCGCTTTTTACTTTATCCCGTCTGTCCCATATATTGGAGATTTTTCG    | 7606 | A_95_P022016 TA14504_4097 |
| 8089 | 96 | 14 | 521  | ACCTCGATCTCGATCTATTGATCAATTTTTCGCCGGAGAATTTGTGACCACAGGTAC    | 7608 | A_95_P088348 BP530022     |

|      |    |    |      |                                                             |      |                           |
|------|----|----|------|-------------------------------------------------------------|------|---------------------------|
| 8094 | 96 | 19 | 955  | GGAGCAGGTGTAAGCAATGAACTATATACAGTATACATGCGTAATTTATTTGCAAAA   | 7618 | A_95_P207287 TA18707_4097 |
| 8095 | 96 | 20 | 503  | GGAGATCAACATCTCAGTCAGATACCAGAGTGCAGTTTCATCAGGACCAAACCTCATT  | 7620 | A_95_P020411 FG168633     |
| 8098 | 96 | 23 | 276  | GTTACCTCTGCATTCTGGTATTATGGATTGGTGTCTGATATTAAGATATCTATTGTTG  | 7626 | A_95_P011721 TA14031_4097 |
| 8099 | 96 | 24 | 809  | TCTTTCACAATGATTAGAGTTGTCAAAGAGTTGAATCATCACTCTGAGTGCTGCTTCT  | 7628 | A_95_P248457 EB684243     |
| 8101 | 96 | 26 | 316  | TCAATTGCTCAAGGATGTCGCCTTGAGGAACACAATATATGCACGTGTTGATTTCAGC  | 7632 | A_95_P135782 EB439340     |
| 8106 | 96 | 31 | 414  | GGAGCTTAAGTTTGGGTAGTTTCTGAGATTCTCATACAGATTTCTTGTTAAAGTTTG   | 7642 | A_95_P101168 BQ843215     |
| 8107 | 96 | 32 | 611  | TGTGGATCATGATAAGGATGTGAAGAGGATGAAGACGAATTTGGAAGAGTTGTGTG    | 7644 | A_95_P138367 FG142142     |
| 8109 | 96 | 34 | 696  | GAACCATCTGAAGATTCTACCAATCATGAAGCAATTGAACAATCCGAGGAACCAGGC   | 7648 | A_95_P126477 EB425789     |
| 8111 | 96 | 36 | 757  | GTTTCATGCATTTGTAGACCAACATCTAATTACTCCAGAGTTAAGTAGTTTTGAGAI   | 7652 | A_95_P250592 EB439564     |
| 8115 | 96 | 40 | 435  | CAAAAAGATGCACGCGCTAGAATAACGAATAAGACGGGAACACGTGGATTTAACTTG   | 7660 | A_95_P042756 BP130436     |
| 8116 | 96 | 41 | 498  | TCTTCATACCCCATTTATGGGACTACATTGGGTTTGTCTGCTGTTGTAGTGTACTGGAG | 7662 | A_95_P263056 AM807618     |
| 8120 | 96 | 45 | 1958 | CCTCCGAATAGTTTGGGAGTGAGGCATGATTGTTGGTTGATTCAATTTGTTTAAATA   | 7670 | A_95_P190087 Y09876       |
| 8123 | 96 | 48 | 494  | GAGGCGCAATTGTTGTAATACTCCGGAACAAGAGCGTAATGTATATGCCAGATGT     | 7676 | A_95_P129412 EB429294     |
| 8124 | 96 | 49 | 871  | CAACTGACCGTCATGGCGGAATTGTATAACATGTACATTTGTTTATAGTTGTACAGTT  | 7678 | A_95_P027456 DV159197     |
| 8132 | 96 | 57 | 423  | GAAGATATACTGTTTCTAGCATAGCTATTACCATTGGAGCTGTAGGATGTGGATACI   | 7694 | A_95_P184377 TA13682_4097 |
| 8133 | 96 | 58 | 253  | AAACCACTAAGAAGATCGTGTGAGGCTGCAATGCCAAGGGTGCAAACACATGTTTC    | 7696 | A_95_P104237 TA12974_4097 |
| 8146 | 96 | 71 | 816  | TCATTGGATGATTTGCAGATCTAGAAATGAATTGTTGGTGGAGATTGCAAGCATATTI  | 7719 | A_95_P267286 DV159689     |
| 8151 | 96 | 76 | 956  | GATGGGTGTCAAGTACAATTTCCGAAGTTCAAATAAAAGTATCACTGATGTTGCAA    | 7728 | A_95_P009426 TA12687_4097 |
| 8152 | 96 | 77 | 800  | ACTAGAATTCATGGGCTGGCTTGCTGGTTTGTACTTTTTATGAGCACTGTACGAGC    | 7730 | A_95_P308688 FG172795     |
| 8154 | 96 | 79 | 585  | GACTGCTTCCCATGTACTTTAAGCTTCATCTGTTTCTGTTTAAAGTCTATAGTTCTI   | 7734 | A_95_P097848 BP534228     |
| 8162 | 97 | 2  | 846  | GATGTTTGCATGGATGAACTGTGCCTTCCCTTTTTGTTATCCGGTTCAGGGTCTTACA  | 7749 | A_95_P223512 DV159253     |
| 8165 | 97 | 5  | 252  | AAGATCAATATAATGGACAGAATTCAAGTGTCCCCCTATACTCCTCAGGAGATGGGC   | 7755 | A_95_P155207 EG649952     |
| 8174 | 97 | 14 | 799  | ATCGAGAAGAGAGGAGAGGCAAAGCTGATGTTTTTCTGATGATGTTCTTTCTGTCA    | 7772 | A_95_P300493 FG174638     |
| 8178 | 97 | 18 | 808  | TACCTACTCTGTTGTCAACAATCGACAATATCGAGGAAAATTGGAGAAAGGGGCTG    | 7780 | A_95_P150057 EB680108     |
| 8184 | 97 | 24 | 815  | CTCTTGTACTTGTTGAATATCCAGTAGAATCTGTTACACTTAAATATTTTCGGTCAGAC | 7792 | A_95_P208677 EB439408     |
| 8190 | 97 | 30 | 432  | GTCCCTATTGTGATAGTTGATGGTGAAACTATGCTGGACTCATCAGATATTATTGATA  | 7804 | A_95_P093653 FG158784     |
| 8194 | 97 | 34 | 1439 | GCCAATGTGGTGACTCTTATGTTCTAAACTTGACAGATTCAAGCTGCTACTTAATGG   | 7812 | A_95_P214817 TA20345_4097 |
| 8195 | 97 | 35 | 1438 | ACATTGTTTACTCTGCTTGTGGAGTTTTGTACGGTCTTAAATGTGGTTCTTAGGTTCT  | 7814 | A_95_P103102 AF120093     |
| 8196 | 97 | 36 | 550  | TGGTGACCCATGTATAGGAGTGACAAAAAGTTTAGCTGTAGAAGCTTCTGTTCTGTG   | 7816 | A_95_P150737 EB680862     |
| 8200 | 97 | 40 | 1343 | TACTGGAAGTGATGGTTTCTGTTTGGAAAGGGCGGGCACATGAATATAGTTGGCTTTT  | 7824 | A_95_P208387 TA18958_4097 |
| 8204 | 97 | 44 | 765  | AATTGTTTCTGTAGAGTTGATGATGAGGTAGGAGGGTTTGGTTGTGAAACAGACGG    | 7831 | A_95_P210107 TA19329_4097 |
| 8205 | 97 | 45 | 944  | CTATGTTCTCTATTTGTGGAATTCGGTGAATGATAATTAATCTTCAAGGAGATTATC   | 7833 | A_95_P026531 TA16388_4097 |
| 8206 | 97 | 46 | 794  | GTCGGATTATGGCGCCATAGCATCTTTGAATAGTAGCTTTGCTCATTAATTAGGAGC   | 7835 | A_95_P188832 TA14656_4097 |
| 8208 | 97 | 48 | 499  | AGAAAAGTGCTGTGCAATGATTGTTGGTCAACCTAGATTAGAAATATCTTTGATCAA   | 7839 | A_95_P302923 FG644087     |



|      |    |    |     |                                                              |      |                           |
|------|----|----|-----|--------------------------------------------------------------|------|---------------------------|
| 8209 | 97 | 49 | 468 | CATCCTTTCACCTTGTGCTCCACCATAATGCTGTTAATCTCTAGTGATAATTTACCTTG/ | 7841 | A_95_P287933 FG157352     |
| 8210 | 97 | 50 | 110 | AGTCAGTCCTAGCCCAAAAGGTGATTCATTATTTTCATTATTAACAGGTATCCCAGAG   | 7843 | A_95_P139857 EB443783     |
| 8212 | 97 | 52 | 854 | GATTCACGAGCTGTTCTTTCTCGGGGTGGTCAAGCTATTCAGATGACAATAGAACATC   | 7847 | A_95_P120632 DW000595     |
| 8215 | 97 | 55 | 212 | TTAGGGGACTGCTGTATATATGGAAATCACCAAGTCTTAATCCTTGTGTGAGCAAA/    | 7853 | A_95_P092058 BP531621     |
| 8217 | 97 | 57 | 898 | GATTTATGATCTGTAACTCGGATCCTCTCCACGAGGTATCCTGCTACATAATTGTGC    | 7857 | A_95_P010791 TA16202_4097 |
| 8221 | 97 | 61 | 214 | AGACTTGTGTGATTTGTTTTGATGTTTCGCTTGTTTTTATCCTGTCTGAACACTCGTTTC | 7864 | A_95_P004361 EH618582     |
| 8227 | 97 | 67 | 880 | GAAGACTGTTACCGTTATCACTTTTTACTTTCTTTTGGCACTTTGTCAAACACTCAA`   | 7876 | A_95_P210982 TA19513_4097 |
| 8233 | 97 | 73 | 772 | TACAAAGGACGGCACTATAGCACCATTAGGAGAAGCTGGTCCGATAGTTGATTGTT     | 7888 | A_95_P121577 DW001660     |
| 8234 | 97 | 74 | 849 | TTATCGGGTATTCTCCTCTCCAGCATTGCCTCGATTATGAATGTGGTAACTGGTATTT   | 7890 | A_95_P248237 DV999351     |
| 8235 | 97 | 75 | 123 | TTTTCGACATTGATGAAACTTTGCTCTCCAACCTGCCCTACTATGTGACCCATGGGCTT  | 7892 | A_95_P114337 CV021551     |
| 8237 | 97 | 77 | 198 | GTCGGAGTAAAGGATCGTCAACAAGGGCGTTCAAATATGGGGTAAAAAGCCAAA       | 7896 | A_95_P007106 NP918018     |
| 8238 | 97 | 78 | 883 | TCTGGTGTGGAGGTTATGCGCAATAAGATTGGCATGAAAAGCAATGTCATCCGTAAC    | 7898 | A_95_P246122 EB451637     |
| 8240 | 97 | 80 | 340 | ATCTCGATCTTGAACAGTGGAAACTAACACCCTTCAATTGTATATTAGCTTTTTCTT    | 7902 | A_95_P099993 BP535160     |
| 8241 | 97 | 81 | 574 | CAGCACTGTAATGCAGTTCCTCTCTTTCTTATGCTAATGATAAATGGAAGTGGTTTTCT  | 7904 | A_95_P019166 EB437086     |
| 8242 | 97 | 82 | 888 | AGCACTACTATTTCCAGAATGAGTTTTCTTGCTATGATTTTTGCACATCCTATTGCTT   | 7906 | A_95_P247122 EB425471     |
| 8251 | 98 | 6  | 448 | GTGAATAATGACTCCTGGACTGTAGATGACAAGTTGAGAAATGTGCTGACAAATATC    | 7758 | A_95_P263906 BP525578     |
| 8255 | 98 | 10 | 459 | CTTGTCTGAAATAATTGATTTGACAGACTCACCTATTTGGTCTGAAGTGGAGTATT     | 7765 | A_95_P277273 AM843516     |
| 8261 | 98 | 16 | 380 | ATCAAGATTTGTTGCTGAAGTTTCAAGTTCCTTGTGCTGGTGGTGGTGGTGGAGGAA    | 7777 | A_95_P310298 FG183282     |
| 8263 | 98 | 18 | 750 | TCTCAGGTCCGTTCTTCTAACTTGCTCTTGATTAATGTAATTTTGTGCTCAATCAC     | 7781 | A_95_P135652 EB439185     |
| 8265 | 98 | 20 | 244 | AACAACTTTCTGTGTTATTCTGACGTCGTTACCTGAATAAAGTGAAAGTAGTTTGT     | 7785 | A_95_P009921 EB432848     |
| 8270 | 98 | 25 | 467 | AGTTTTCAGTTTGTAAATTCGGTATTTTCGTTCCAAGGATGGTTGCTTTGTTAGCCTC   | 7795 | A_95_P080225 BP527954     |
| 8271 | 98 | 26 | 686 | CAGATAGTGATATTGTGTCTGGTTTATGGCATAACTGATGTTGCAATTTGTTATTTGG   | 7797 | A_95_P115377 EB425143     |
| 8275 | 98 | 30 | 842 | GCTCAGTTTCCACTTCTGTTTTGGCTTGGAAAGATAAGTCTTAATTGGTTCTTTGAA/   | 7805 | A_95_P295793 EB450832     |
| 8277 | 98 | 32 | 695 | ACCATTGACAAATTTGGCATTGGCTGTCAAGAGGGACTCAACCTTTGCAAGCAAGGT    | 7809 | A_95_P139317 EB682717     |
| 8278 | 98 | 33 | 549 | ATAATCTATTTGAGGGGGCGTATAACTTTGTGTTGTGCGCCTCAAATCTCACTGATCC   | 7811 | A_95_P021306 BP134065     |
| 8284 | 98 | 39 | 413 | ATTTGTAAAGCGCACATACGGATTTAGATACTGCTGTATATTACGTATAGCATACGCA   | 7823 | A_95_P213357 TA20029_4097 |
| 8285 | 98 | 40 | 184 | CAAATGGTGGCTTGTCTGAAGAACCCTAGTTAGCGTGACTCACATGCATAAGATAC     | 7825 | A_95_P107317 EB677644     |
| 8286 | 98 | 41 | 565 | ATCCAATGTAACACAGAGATGAATACAGGATGCTTTCCTGGAAAAGGGAGAAGATA`    | 7827 | A_95_P044421 BP130871     |
| 8292 | 98 | 47 | 675 | CGACCATAGGCAGATGCTTCGTGTATTAGTTTTCTGTTTTGATTTATTTACAATCCA    | 7838 | A_95_P125347 DW005140     |
| 8296 | 98 | 51 | 585 | TGTCCATATCATTTCTTGATGTAACGATCTTGATAGCTGAGTGTCTAATGTGTCAT     | 7846 | A_95_P134722 EB437405     |
| 8300 | 98 | 55 | 867 | TACTTGCCTTGAATGCCAGACCAGTAGCTCAGGACATCTATTTCTACTTCGCTCTAA`   | 7854 | A_95_P151497 EB681708     |
| 8304 | 98 | 59 | 821 | ATTAAGCCAAGGCAGGCTTGTTCGACTTTAGCCTGTAGTTATGTTGGACAATGTCCCT   | 7861 | A_95_P244607 EB678191     |
| 8305 | 98 | 60 | 246 | GAGGGAGGTTTAGCACGTCATTTGCACAACCTTTATATATATAGTTTTAACGAAAGTC   | 7863 | A_95_P109202 CV019185     |
| 8306 | 98 | 61 | 800 | TGTTTGCAAATGGGGAGGAAGTTTAGTGAAAGTAAATAGTTCATGGTTATGCAGTC     | 7865 | A_95_P198542 EB424705     |

|      |    |    |      |                                                               |      |              |              |
|------|----|----|------|---------------------------------------------------------------|------|--------------|--------------|
| 8308 | 98 | 63 | 425  | TCATTTCTGGGCCTTTCTCTGTGCTGATCTAAGTTTGTTTCATAATTTTATCCATGGATC  | 7869 | A_95_P264941 | AM822487     |
| 8312 | 98 | 67 | 524  | TTTGCCTACTATCTACCTCCCAAACCCACTTGTGGGACAATACTGGGTTGTGTTAATC    | 7877 | A_95_P068785 | BP137216     |
| 8314 | 98 | 69 | 664  | TTCAGTACCTTTCTAGAGATGTTTTGCCTTTCTAGAGATGTGTTGTGGCATATCTTCCA   | 7881 | A_95_P178677 | TA12309_4097 |
| 8316 | 98 | 71 | 1095 | GATTCGTGAGACTGATTCCTCAAACCTCAAGCAAGAAAAGACAGAAGTTAAAGAGAAC/   | 7885 | A_95_P193297 | TA15640_4097 |
| 8319 | 98 | 74 | 643  | GAGGCAAATTTTTGCTTGGTGCTCTTTGCCATGATTTTCGATTTATTATTTTCATGAGTT  | 7891 | A_95_P016071 | EB429539     |
| 8321 | 98 | 76 | 825  | GATTGAGGATCCACTTTGGGTCATGAATGTGGTTTCTCTTATGCTGCAAACACGCTT     | 7895 | A_95_P013981 | AB120529     |
| 8323 | 98 | 78 | 854  | AATTGAACATATCGTGGCAAACCTGCTGCCAGATCTTCAAAGGCTCAGTCAACTATGCC   | 7899 | A_95_P229819 | DV159724     |
| 8329 | 98 | 84 | 805  | GATTGGCATTGGGTCCTAGATTGAAGGATTTCTATGAATTGTATGTTAGATCATGAG/    | 7911 | A_95_P130302 | EB681752     |
| 8330 | 98 | 85 | 335  | CTGGAGTGTATATAATCTGTTGCGGCACTAAGTTGATTGTCCCTGGATATTTAGTTCT/   | 7913 | A_95_P160957 | EH619640     |
| 8331 | 99 | 1  | 897  | AAAGCTCCGGATCTGGCACAATGCAGGCCAACCACTATTTTTAACTCCCTTTTCAGTGA   | 7914 | A_95_P245447 | EB427825     |
| 8337 | 99 | 7  | 179  | ATATGGTTGTTGAATGAGCTGTTTCTTCAGTGAAAATTTGAAGTTCCTCTTGTACGGA    | 7925 | A_95_P107769 | CV018522     |
| 8340 | 99 | 10 | 773  | AGATGCTGTGTATATGTTAATGAAGAGACTTGGATATGGAGATGTGGAAATTATTGC     | 7931 | A_95_P027166 | EB427252     |
| 8343 | 99 | 13 | 1799 | CGGCTGCCCTGATCATGTACTATAAATCTACAAGTATAAATTGTTAGAATCAACATGC    | 7937 | A_95_P023086 | TA13666_4097 |
| 8345 | 99 | 15 | 905  | CTTTTGAAGAGAACTTTTGGTGGAATTGTTGGTTTTAGTCTTCTTTTGCCTGCTTATAC   | 7941 | A_95_P007876 | D85912       |
| 8348 | 99 | 18 | 2610 | CTCCAGTTTTAGTTTGTCTGCGAAGTTGTCTGTTTTGAATAATACCCTTAGTTGGTGA/   | 7947 | A_95_P238104 | AF127239     |
| 8351 | 99 | 21 | 790  | GCCTTAGCTTTGAGTGTACACTTGAATTACTTTCTACTACTTGCCTGCCCTTTTCATTTG/ | 7953 | A_95_P012616 | DV159852     |
| 8353 | 99 | 23 | 1187 | CTCCTGAACAGACTGATGTACGTTTTTAAAGCTATGTCTGTATGTATAAACTCTC       | 7957 | A_95_P207967 | TA18862_4097 |
| 8354 | 99 | 24 | 661  | ATCAGATGTTGGAAACACTTGGTTGTTCAATTTCTTGTCAAACCTTAAACTTCAAGCTC   | 7959 | A_95_P033684 | EB677750     |
| 8355 | 99 | 25 | 799  | TCTCCTTATGGGACGTTAACATCTATGTATCAAAGTCATCCTTGCAAATCAATGTTGC    | 7961 | A_95_P296688 | EB678890     |
| 8356 | 99 | 26 | 470  | GAGAATCGGGATGATTACTATTCTCCAAGGAGATGCAGGTCAAATCTCCATCTGTT      | 7963 | A_95_P148212 | EB677460     |
| 8357 | 99 | 27 | 258  | TATTTGTTCCCGTTGTAAATATGATGTTGATGCTGCGTATGCCTTTGTTGCTTAGGTT    | 7965 | A_95_P142637 | FG640214     |
| 8369 | 99 | 39 | 1270 | TCCCAAATATATATTACTCCAATTGCTATCATCCCTTCGCTGTCGTTATGAAAGGATAT   | 7989 | A_95_P013216 | TA14129_4097 |
| 8370 | 99 | 40 | 729  | GGACCTGTAGTTGCTCCGTAAATTATGACAATGTTATATAGTTTCTTCATACTTGCTTC   | 7991 | A_95_P016231 | EB683870     |
| 8372 | 99 | 42 | 638  | GGACTTTGGCCTTAGTGCAAATACTTTTCTGCTTCAATTTCTAAGATGATTGGGTA/     | 7995 | A_95_P016391 | EB679128     |
| 8373 | 99 | 43 | 859  | GGGTCGTACAAAAGCTGAAAACCTTTGGAAGCAGGCAACAAAGACTATGAAAAGCC      | 7997 | A_95_P298873 | FG155294     |
| 8375 | 99 | 45 | 376  | CGAGTCTCGTTCAGAAAACTTGCAAGGAAGCTAAAGAAATGTTCAAACCTTCATG       | 8001 | A_95_P134027 | FG640186     |
| 8377 | 99 | 47 | 555  | GCGTGAAGCTGGAAAACAGACATCTCATGGTGAGGTGAAGTTGAATGAGGTTGATG      | 8005 | A_95_P054771 | BP133531     |
| 8378 | 99 | 48 | 703  | GGAAAATCAAAGTCCTTTTGCTTCAAGAATGCCCTGTGCTTAGTAAGTTATCCTGT      | 8007 | A_95_P136697 | EB428526     |
| 8385 | 99 | 55 | 555  | TATGGTGCAAGGAATTTGAAGAGAATGGCATAACCAGGATAGGTTTGAAGAACTGGGC    | 8021 | A_95_P136447 | FG143463     |
| 8396 | 99 | 66 | 353  | CTATTTCTGAGGCTAGAGCAAAGAGATCCGCAATCAACCAGGGGAAACACTAATAC      | 8041 | A_95_P112067 | FG136272     |
| 8397 | 99 | 67 | 127  | TTTGGCTCAGTGAATGCTCCTAAAGCCAAAGAATCTAATCCAAGCTGCAAGTACAC      | 8043 | A_95_P094283 | BP534288     |
| 8398 | 99 | 68 | 856  | CTGGAAATGGGTCTTCAGAATTTTCGAGGAGTACCAAGTGTGTGCTGTTACTGTTGGT    | 8045 | A_95_P296958 | EB680579     |
| 8402 | 99 | 72 | 752  | GAGTTTGGCAATCTTTTTGCCATTTTAGCAGTATTCCTTCATCTGCTTGGCTACATCT/   | 8053 | A_95_P019626 | EB447882     |
| 8403 | 99 | 73 | 509  | CCAAAGAAGGAGTAGTTGTGGTATCTCATGGTGGTGCAAAGTGCATGGACCATTAA/     | 8055 | A_95_P151477 | EB681680     |

|      |     |    |      |                                                             |      |                           |
|------|-----|----|------|-------------------------------------------------------------|------|---------------------------|
| 8404 | 99  | 74 | 663  | TTTCCCGCTAAGGGGCTACTTGTATGAGAAAAAGAAGAGTCCTTTCCGAAGGCTTTG   | 8057 | A_95_P053391 BP133164     |
| 8409 | 99  | 79 | 803  | ACAAAAAGCATTACCTTCAGAGAGCGGGAACATAGAAAGATCGCAGAGACTCGTG     | 8067 | A_95_P294308 FG162382     |
| 8411 | 99  | 81 | 1201 | TGTGGTGAAGCCAGATGTTAAAACTTTACAAGCCTTATGTCATATGCTTGTGACCGT   | 8071 | A_95_P210972 TA19510_4097 |
| 8412 | 99  | 82 | 400  | ATTATTGCACAGTTGCTTGGATCCACTGTTGCTTCTCCTTGAATTTGCCACTGG      | 8073 | A_95_P004971 EH666154     |
| 8416 | 100 | 1  | 737  | ATTCTGTACCCAGTGTGCGTTTTCTGTTTTATGATATTTGCAACCTGTTAATCTAGA   | 7915 | A_95_P244782 EH614145     |
| 8417 | 100 | 2  | 729  | AAATTTGAGAATGAGCGAGCTACGTTGAGCTCTCAGAGAGAACGCGCAGCTGATAT    | 7917 | A_95_P137457 EB441186     |
| 8418 | 100 | 3  | 979  | GTTTCTGAATCTTATGTGTACGCAAATACAACCTTTTATGATGACTACCTGGATCTTGC | 7919 | A_95_P179917 TA12616_4097 |
| 8425 | 100 | 10 | 737  | CGACTGAAATAGTCATGATTCATGAACATGGCATCTTTGTGCAATGTGATTGATTGAC  | 7932 | A_95_P195532 TA16138_4097 |
| 8429 | 100 | 14 | 334  | TGTATCTTGTAGAGATGTTGCCTGATAAAATATATACACTCGTGACTCGTCTATAG    | 7940 | A_95_P198044 EH621781     |
| 8434 | 100 | 19 | 485  | GGTTTCTCATATTTCTCTAGCTGTGCTAGTGAATCTTGAATCCGAGTTTTTACATGATT | 7950 | A_95_P300798 FG644329     |
| 8437 | 100 | 22 | 2238 | CCTCTCGTTCATTCTTGGGAAGACATGTATAGAGACATTCATCAATTTAGAGTTGGAAC | 7956 | A_95_P143072 X60057       |
| 8439 | 100 | 24 | 860  | AGTTGAGGCATTTATCCCTAATACTGGCCGTGGTATCCAAGGTGCAACTTCACACTGT  | 7960 | A_95_P027556 TA20092_4097 |
| 8441 | 100 | 26 | 1561 | GACATCAAAGGGTTGTATCTGAAGTACAATGTCAAAGTATGAAATCATTCACTTATGT  | 7964 | A_95_P189707 X79138       |
| 8448 | 100 | 33 | 804  | CTGCTTGATAGAATTATTCCTCCTCGTTGCAGTTATTTTTAGTAGTTGGATGTGATTTT | 7978 | A_95_P272501 FG157506     |
| 8457 | 100 | 42 | 955  | GGCGTTCATCCGTTGGTGTGGTACGGTTTTAAGTTCAGTATGGTTTGGTTTTTTATT   | 7996 | A_95_P009331 TA12523_4097 |
| 8458 | 100 | 43 | 687  | CAGAGGATTTGCGTTTTACCAAGAGGTTATTCCTGGTACTTCTACCTACTCGGAAT    | 7998 | A_95_P231914 FG197322     |
| 8459 | 100 | 44 | 863  | ACTGGAAGGCAATCATTCTTTGTTTAGTTCGTCAAGTCTGCTTTAGTGGATTTTGCT   | 8000 | A_95_P203977 TA17968_4097 |
| 8460 | 100 | 45 | 379  | CACTTGATATGGCCAGTGCTACATTGATTCAAATATTGAATGACGACTTATAACCTTA  | 8002 | A_95_P002246 TA13486_4097 |
| 8464 | 100 | 49 | 144  | GCACACACTCTCTTTATACCAACTTTACCTTTAAAATTGGGGAAATAAAAAAGACGGA  | 8010 | A_95_P126007 EB425207     |
| 8468 | 100 | 53 | 575  | GTTTCATGTTAAACCCTGTAATCTTTAAAGGCATCAAGTCATCTTGAGATTAAGTTTT  | 8018 | A_95_P202117 TA17566_4097 |
| 8470 | 100 | 55 | 753  | CGACATTAGTGACTTATCTGGAGAGGGAAATATTGAGAGTATGCTGTGAGTTGAAAT   | 8022 | A_95_P136737 EB440491     |
| 8474 | 100 | 59 | 1358 | AGCTAATACATGGTCTAGTCGACAGAATCATGGAAGCAACTAGAACTTCTTTTGTATC  | 8030 | A_95_P203477 TA17861_4097 |
| 8475 | 100 | 60 | 679  | GGAAAAATCAGTTATCACAATGTCTCCCTTAATGCAGACTTACATGGTGCCCTAATTC  | 8032 | A_95_P161007 EH619708     |
| 8476 | 100 | 61 | 421  | TCACTGTTGGATAGCTGGTAGTGAGTTCGACTTGATGGCTACAAGTTGATTGTCTTAT  | 8034 | A_95_P045541 BP131172     |
| 8477 | 100 | 62 | 757  | TCAAAGCTATTGACCTGTGGAGAGGAGTATGACCTTGAACAGAAATGGACTGAATCC   | 8036 | A_95_P311483 FG142405     |
| 8479 | 100 | 64 | 633  | ACAAAAAATTCTGCAGCAGTACGATCAGGAATGCCTATTTCCATAATGTGGGGGCA    | 8039 | A_95_P304428 FG186266     |
| 8484 | 100 | 69 | 791  | ATTTGCATTGGCTTCCAAAATACCTGCTGAGGCTACTCCTTCAGCCACTGATGACAAG  | 8048 | A_95_P128992 EB428762     |
| 8490 | 100 | 75 | 868  | GCTCCGGAATTTGGTTCTTCCCTCCTTGCACCTTCTTTTTATGTTGCTTATGGATCTG  | 8060 | A_95_P025766 EB429415     |
| 8497 | 100 | 82 | 609  | GAAAACCTCGCTTACTGATTTTGGCTTAGGCGCCAGAGGATAGAATTCTGTGTGCGAT  | 8074 | A_95_P049481 BP132172     |
| 8501 | 101 | 1  | 794  | GTCCTCGTTTGTGCACTTAATCGAGCTCTGAATTTTAAATCATTAGATCTCAGATAT   | 8081 | A_95_P201742 TA17488_4097 |
| 8506 | 101 | 6  | 423  | GTAGACAGTGATGAATGGATGTATAAGAGGGGATGAAATAAATTTGAGACTTCCAA    | 8091 | A_95_P308258 FG641836     |
| 8509 | 101 | 9  | 475  | GCGTTTGTACTCCTTTGGAATCATGGTTGGTTGTAATTTGAACGATAAACAGTTTAGC  | 8097 | A_95_P001586 FG637765     |
| 8511 | 101 | 11 | 742  | TTTCCGAGGAAATGATCCAGACTCATTGCCCTGCACCTGCAGCTGACATTTAGATTA   | 8101 | A_95_P159727 EH618178     |
| 8512 | 101 | 12 | 534  | AGCTTGGTGGTCTTAAGAATGGTTCGGGTGGGGGATTCTCTTAAGAATAAAGAATTA   | 8103 | A_95_P007221 NP918186     |

|      |     |    |      |                                                             |      |                           |
|------|-----|----|------|-------------------------------------------------------------|------|---------------------------|
| 8516 | 101 | 16 | 107  | TAAGAGCATGCACTATCCGTTTTTAATCTACGATGTTACGCTGGGAACTATTTTCACCT | 8111 | A_95_P107352 CV018333     |
| 8519 | 101 | 19 | 792  | GCATTTTGTTGTGCAATTACTGTGTCAAGTACATTGGTTAGTCCGTTCAATGATGTAA  | 8117 | A_95_P180882 TA12847_4097 |
| 8520 | 101 | 20 | 839  | GTCATAGCACAACCTATTGGATGTTCTTGTGGCTTGATTACACTTGACTTTAATCATA  | 8119 | A_95_P227744 EB449440     |
| 8524 | 101 | 24 | 469  | GTCATACTTTGCAGATGCAAAATTCTACCTAGATTCTTGTGAACCAAATGTGGATAAA  | 8127 | A_95_P041751 BP130174     |
| 8525 | 101 | 25 | 224  | ATATAAATAACCAGGATCTGCTGAGTTTACATGGTTTCAGATGCCTTCCAATCATCGCG | 8129 | A_95_P155117 EG649909     |
| 8526 | 101 | 26 | 476  | ATTGTTCACTCTACATGCTTCTCAGATTCATATTGATTTACCTACCCTCTCAGATAAAG | 8131 | A_95_P127777 TA17748_4097 |
| 8527 | 101 | 27 | 907  | ATGTCAAGTCATGAAGCTACCATATTAATATATGTTCTCTTCCATTTTATCGTCCTTGG | 8133 | A_95_P015206 EB441030     |
| 8528 | 101 | 28 | 415  | TCGCAGACTATTTCTGCTTGGCTTTCCTCAATTAAGTCATCTCTCGTTAAACTATGAAC | 8135 | A_95_P086385 BP529523     |
| 8531 | 101 | 31 | 384  | GGTCTTGGACTTTATTTATGCTTGGGGAAGCATTCTTATCAGTTCAAGAAAAAGAG/   | 8141 | A_95_P024326 BP535420     |
| 8537 | 101 | 37 | 3053 | TAGGGAAGAAATGTAAGTACTGTACTAGTATGTCTAAGCCGAAAGGTTGTAATGTT    | 8153 | A_95_P007297 TA12768_4097 |
| 8538 | 101 | 38 | 872  | AGTCTGTTGCGATGTTGTCGCAAATGGAGGTGAGTACTGTGCTCAAGTATGCAAGAT   | 8155 | A_95_P231389 FG160044     |
| 8542 | 101 | 42 | 230  | ATATTTCACTTGGCTTCATGGTTTTGATCTCCAAAAGTAAAATAAAGCGGTGCGACA   | 8163 | A_95_P096248 BP533540     |
| 8543 | 101 | 43 | 758  | ATTGCCCTTCGAGTTTTACTTAGTCGTTGGTTAGGTTTTGTAAGTAGATTCATTTTT   | 8165 | A_95_P290258 DV162430     |
| 8548 | 101 | 48 | 536  | CTCCTAATTAAGAAGTGAATTTTGTGCTTTCCTTTTACTTGGTTCCCTTAGCTTTGGA/ | 8175 | A_95_P125302 DW005102     |
| 8552 | 101 | 52 | 889  | TAATGGTAGCCAGGTTCTGCTGGTCATGTATGAAGCTAAAGTATTGATTTTGTATTT   | 8183 | A_95_P217172 DV159981     |
| 8554 | 101 | 54 | 704  | ACGTGCTGAACCTTCTAATCTGATGTAGAGCATGGGTTGCAGGTGATCATATGGGAT   | 8187 | A_95_P161382 EH620127     |
| 8555 | 101 | 55 | 547  | GTCAAGTGTGTTGTAGAGTTCATACTGAAGTTGCTTGTGTTGACTCTTAAACGGTTAT  | 8189 | A_95_P221922 FG635938     |
| 8560 | 101 | 60 | 323  | CTGTAGCCTCTAAGTCTCTGAACCTATTTCAATCTGAATATTTTCTTAGTATTGGG    | 8199 | A_95_P002706 TA14555_4097 |
| 8565 | 101 | 65 | 474  | CGCCCTTCTATCGAATTCATTTTTCTTTATCTTTTTTAGTATGGAGGTGCTCATTTGAC | 8209 | A_95_P097953 BP534267     |
| 8578 | 101 | 78 | 333  | GCAATCTCAGGCCGAATCTTGTGGCTATTGATGAATTGTATTAGTTTAGTTGTTATAT  | 8235 | A_95_P159217 FG635710     |
| 8581 | 101 | 81 | 648  | TTAAGATGAACCTCCCTCAATGACAATGTTGGTTGATATTCACGGCCACTTTTCGACTC | 8241 | A_95_P030621 FG645098     |
| 8582 | 101 | 82 | 852  | CTTTTCTTTTACATGTGAAACAGGTTTCTTTGGGACTGTCTTCAATTCGAAAGGGGAC  | 8243 | A_95_P020021 TA13824_4097 |
| 8583 | 101 | 83 | 1934 | CGTATCTGCGCATTACTCATGTTATTTACATTTGCTTGAATACCATGCTTAAGCGATA  | 8245 | A_95_P020721 TA16563_4097 |
| 8586 | 102 | 1  | 507  | TTTTGAACAGGAAGTTTTGACTGATGTGCAATCTGAGTAACAAATTCCTGAGTTGT    | 8082 | A_95_P207282 TA18706_4097 |
| 8592 | 102 | 7  | 773  | CCTGATCATCGATCTACTTTTGAACCATTACTTGAGTTGTTACTGCTTTGAACATTTA/ | 8094 | A_95_P027731 EB428593     |
| 8607 | 102 | 22 | 776  | GAAACTCGATGAGAGAGCTTACGCCTTTTTAGCTGTTTCAGGCTATGATGGGTTAGG   | 8124 | A_95_P146627 EB450702     |
| 8612 | 102 | 27 | 752  | TCCCTTTGTATAAGAATCAGTTAGCAGAATGCCCAAATAAAATATGAGGCTCCTGTA/  | 8134 | A_95_P164132 EH623282     |
| 8613 | 102 | 28 | 85   | GCATTTATATGCTTTGTATAATGGCACTTTGGACCCTGTCTTAGCTGAAACTAATACA  | 8136 | A_95_P019891 EB682845     |
| 8623 | 102 | 38 | 301  | GCCTCTTTCATAGATTACAGCTATTCAGTTTCTTGGAAAAGAGATGATTTTGTGCA/   | 8156 | A_95_P111777 CV020369     |
| 8624 | 102 | 39 | 2093 | ACTATTTAGATCTGCTAAGCTCATGTAGGTGGTTTTGTTAGTGTACTTTTTTGGTGT   | 8158 | A_95_P008141 X97913       |
| 8625 | 102 | 40 | 461  | AGAAGATTGATTTATGCGGTTTCTAGGGGTACAAATTCGTTTACCTCTAAGTTATGG   | 8160 | A_95_P021581 TA15613_4097 |
| 8634 | 102 | 49 | 770  | GTATGATGAAATTTGGTCCCTCTATTGTCCACAGGAAGTGTCTTAAAGCTTGGTGAGA/ | 8178 | A_95_P146617 EB450695     |
| 8635 | 102 | 50 | 879  | TGTCTTTGATGAAATGATGGTTAATCTGCCTGTCAATTTGAACCATTGGCTTACCTAG  | 8180 | A_95_P190967 AB024575     |
| 8641 | 102 | 56 | 770  | TCTTATCGTCTTCCGTTGTATACCAGATTGGATTGTTATGTAAGAGAGAAGGTTTAA   | 8192 | A_95_P114847 TA12745_4097 |

|      |     |    |      |                                                             |      |                           |
|------|-----|----|------|-------------------------------------------------------------|------|---------------------------|
| 8643 | 102 | 58 | 770  | AAATCATCAACATTTGCCGAAGTATGGGAAAAGCTGTCATTGTTGCCACCAACATGC   | 8196 | A_95_P014931 TA18563_4097 |
| 8644 | 102 | 59 | 466  | GCAGTTGCTTGATGTTTTATTGGAATGTAATTAACGTTTGAATCGCTTGCTGTATAC   | 8198 | A_95_P002756 TA11916_4097 |
| 8645 | 102 | 60 | 795  | GACTGATTCCAGTGACTATCTTGATGCTAGAACTTTTCGAGGAGTTACTAGAGCATCTC | 8200 | A_95_P152092 EB682389     |
| 8646 | 102 | 61 | 222  | CTCTGCTAGTCGCTCTATTGAATTGAAATAGAAATACATATCATGTTTCCTTCTCTCC  | 8202 | A_95_P028291 TA16554_4097 |
| 8649 | 102 | 64 | 866  | TTTCGAAGAAGCAGTTGAAATTAACAACCTGTCCCTCAAGTTTAAAGTAGTTCCATC   | 8208 | A_95_P227619 EB427789     |
| 8652 | 102 | 67 | 741  | TTCCAAGACAAGAAAGTTACTTGCAAAGTAGGGCAACTGCTCTTCAAATGTTGAAT    | 8214 | A_95_P127182 EB426644     |
| 8655 | 102 | 70 | 796  | CAACTGCAGTGAAATTGTATGAAGGTTGTTTCCATTGTTGGTTAAAGAATATCGATTC  | 8220 | A_95_P149702 EB425537     |
| 8661 | 102 | 76 | 815  | GTAGCGTGTGGCCCCCTTATTGTTTTCAATTGAAGGTTACTTTCTGAGTAGCCAAAA   | 8232 | A_95_P119967 DV999585     |
| 8665 | 102 | 80 | 1046 | TAAAGTGGAGTTCTGCAGGAAAAAGTGGAGCTGCAAAAGGATCCAAGTGCATTAAT    | 8240 | A_95_P193987 AB193039     |
| 8666 | 102 | 81 | 807  | TAAAAGCTGCTACATTGGGTCAACATTTATGCCAAAGCTCCAGGGGAAGTTTTTGGC   | 8242 | A_95_P267736 DV161485     |
| 8669 | 102 | 84 | 390  | TTTTCCATGATGTAGGAGTTAAATCGTAAGTCAGCTATTGCAGAACTTATTTGTCAT   | 8248 | A_95_P110242 EH617354     |
| 8672 | 103 | 2  | 684  | GACCTTGCTTCTCCATGATCTTGGTTTATACTACTTGTACCTTAGTGTGTGTTGTA    | 8253 | A_95_P119227 DV162334     |
| 8674 | 103 | 4  | 659  | GGGCATTGTCTTAGTAAGAATTATTGCTCAGAAATTTGCAGTACTAAAAGTTTTTAC   | 8256 | A_95_P178077 EB678598     |
| 8675 | 103 | 5  | 845  | CTCACCTTTTATAATAACCTTGTGTGGGCACTTTCAAATCATTTTGCACAAGTATGTGC | 8258 | A_95_P219147 DV999968     |
| 8677 | 103 | 7  | 521  | AATTTCTTAGCTTTGGACAGACTTTGAAAAATGCCTTGTGCGCTTACCGACTTGGGGG  | 8262 | A_95_P153172 EB683478     |
| 8684 | 103 | 14 | 723  | CGGAAAAGGGAAGTGGAAGGGATGTATAAGATGAATTTGAAGTCTTATGTTTCT      | 8276 | A_95_P139832 EB443754     |
| 8691 | 103 | 21 | 906  | ATGTGGATTGCGATTTGTTGGATGGACCGATTTGGATAGATGAAGCTACTGTGGTT    | 8290 | A_95_P180482 TA12754_4097 |
| 8692 | 103 | 22 | 424  | TGACAGATTTCTCAGAAGCATCAAACAAAGTCGAAAGCTTATCCTTCTTTGAACATT   | 8292 | A_95_P265881 AM830968     |
| 8693 | 103 | 23 | 713  | GACTTGAAAGAACATGTGATCCAGCCCCGTGATCCAGCGAAGATACCTTTGATGAA    | 8294 | A_95_P159422 EH617609     |
| 8695 | 103 | 25 | 739  | GCATCTGCCATTTGATTCTGGACTCTTAAACATTTCAGAAGACATGAAACTATCGTAA  | 8298 | A_95_P162342 EH621277     |
| 8696 | 103 | 26 | 624  | TTATTACCAGAAAATGATCGAAGCCGATCCAGGAAATGGTCTCCTTCTGGCCGATTAT  | 8300 | A_95_P217117 FG162154     |
| 8699 | 103 | 29 | 260  | GTGAATGTTGTATCCACTCATGATGATGTTTTCTTCTGATATGATACTTATGTGAGCA  | 8306 | A_95_P096093 BP533472     |
| 8700 | 103 | 30 | 166  | GAAATTGTGACAAAACCTCTCTATGAACTATTCAAGTGCAAGTGCAGAATTTGAGAA   | 8308 | A_95_P012711 EB433346     |
| 8701 | 103 | 31 | 337  | TTGTTTTGCTGTTGATGATCGCGTCCCGAACTGTAAATTAAGTCTGCTTTCGTTGG    | 8310 | A_95_P162952 EH621942     |
| 8703 | 103 | 33 | 344  | AGTGAATTTGCGCGGCGAAACTTCGATTTTTTCGAGATCGGAGGTCTTCAAATCTCAT  | 8314 | A_95_P242382 DQ460091     |
| 8705 | 103 | 35 | 774  | GTAGTATCGAGTCTGTGAGTCTAATTAAGATTTTCGAGTCTTTGTTATAGTACTTCT   | 8318 | A_95_P119887 DV999500     |
| 8706 | 103 | 36 | 437  | TAGCAGTAAATGACTTCATGTTGCTGACACTGGAACTGGTAGTTCTATTATTGTTGT   | 8320 | A_95_P281858 AM783785     |
| 8709 | 103 | 39 | 1102 | GCTCTGTATAAGTGTGAATTCATCCACATTCTGTAAAATTTACGCCTAAATGAATC    | 8326 | A_95_P028111 TA15042_4097 |
| 8710 | 103 | 40 | 451  | AGGGTTGCTTAGTTTTGGTAAGGTTGATGATGTAATTCACCGTTACATAGTCAAGGA   | 8328 | A_95_P181562 TA13009_4097 |
| 8715 | 103 | 45 | 1276 | GGAGGGTTGAGCATTGTTTCTCGTTTATCGACACAGTTGATATATTTATAAAATTTG   | 8338 | A_95_P013601 TA15948_4097 |
| 8716 | 103 | 46 | 867  | AGTGATCACTGAGCCTTGTGTACCCTATGTACTATCTCGAGGTGACATGAGTAAAGC   | 8340 | A_95_P269756 FG159963     |
| 8718 | 103 | 48 | 247  | CTGCTCTGTTGAGGCACTGAGTGTGTTATGCTGTATTGTTTTTATGAGATTTGATAT   | 8344 | A_95_P001166 FG622072     |
| 8723 | 103 | 53 | 848  | ATTGTGGGTGCATATATCTCATCTAAACATGGGAATCTTGGAGAGTCAGCAGCTTTG   | 8354 | A_95_P225732 FG157369     |
| 8725 | 103 | 55 | 618  | ATGATTATGGAGACCCGTGTAAATACATAGATGTAATGGTGAAGTGTGCTTGATAT    | 8358 | A_95_P286903 FG643169     |

|      |     |    |      |                                                             |      |                           |
|------|-----|----|------|-------------------------------------------------------------|------|---------------------------|
| 8727 | 103 | 57 | 628  | AAACAGCACGCTGTAGTGGCCTTGCAATTTGAATCGTGGATGTATAATTTGCATAGT   | 8362 | A_95_P295093 EB446390     |
| 8728 | 103 | 58 | 519  | GCGGCCGCTGTGGGATTTATTGAGCAACGACATGAAGTACCACAAAATTTTAGAAGC   | 8364 | A_95_P280023 AM799744     |
| 8730 | 103 | 60 | 804  | TTTGGAAAGTGAAAGCCTTTTAGCGATAATCTTGAACGATATCCAGAAGTATATTCATC | 8368 | A_95_P217377 TA20919_4097 |
| 8736 | 103 | 66 | 506  | AATGCAATCACTGGAGCAGTTTGGGAAGCTACTTGAGAGCTAACACATAGATTATC    | 8380 | A_95_P071195 BP525643     |
| 8738 | 103 | 68 | 88   | CTTCGAAAAGTTGAGATGTATTATGGTCACAACAACTGATCTATATACTTCTGTC     | 8384 | A_95_P129517 EB429473     |
| 8744 | 103 | 74 | 539  | GAGTTCCTTCAAGATGTGATAATAGTTGTTGCTTAATGTATTGGTTAAACGCTTGTCT  | 8396 | A_95_P124132 DW003980     |
| 8751 | 103 | 81 | 503  | GCAAATTTATCTGGATGGGATTTGCAAATGTTGCTGACGGGCATGAATCAAAGTTT    | 8410 | A_95_P049626 FS412189     |
| 8752 | 103 | 82 | 452  | GCTGGTAACTCCAATAATAAATTATCTGGTCATCTACAAGAAAAAGAGAGGAAAAG    | 8412 | A_95_P209252 TA19149_4097 |
| 8754 | 103 | 84 | 783  | CATGTTCTTGATGTTGTATTCTTGGGGTTTGTATGCGAAATTGGCAGGTTAAACAAA   | 8416 | A_95_P243437 EB680757     |
| 8755 | 103 | 85 | 546  | CTGCCGTGTTTGGAAATTTGGCACCTGTATGATGATTACTTTTAGTGATGAAAGAGATT | 8418 | A_95_P120047 DV999725     |
| 8758 | 104 | 3  | 679  | CTCGAAAAACTCTTATTCTCGAGCTTTGCTGATGAGTGTATAGTGTCCACATTGG     | 8255 | A_95_P221688 TA21872_4097 |
| 8759 | 104 | 4  | 807  | GCTTTCTGCAGCTGGTCATCCAATTACAATAATACATGCAAATTTGCTGTTAAAATC   | 8257 | A_95_P009531 EB429945     |
| 8763 | 104 | 8  | 873  | CATGTCTAAATGGTATGTGCGAATCTAGATCATATGGAAAATATCCGTTGACATGGT   | 8265 | A_95_P011571 DV160063     |
| 8766 | 104 | 11 | 769  | GCGAGGGGAGAGATCTTCTGACTGTCATTTTATCATATCTTGAACCTTTTGTATTGT   | 8271 | A_95_P012036 TA12171_4097 |
| 8769 | 104 | 14 | 809  | TACATTACCTGCATTTTTCAAACCTTTGCAAAAGCCAAGAAGCAAGCTATATAGACCT  | 8277 | A_95_P206842 EB452141     |
| 8770 | 104 | 15 | 431  | GGTTTTATGGAGCTGTTGAGTTCAGCTTTGCCTTTATTTGGTCCTCTAATTGTTGATT  | 8279 | A_95_P267153 DV158783     |
| 8773 | 104 | 18 | 844  | GCTAGGCAACGGTTTCTTTTATGTCATTTGAGTCGACTGCGTTTCGTCATTCACAATG  | 8285 | A_95_P014156 DV160978     |
| 8777 | 104 | 22 | 292  | GCTGCTGCCCTGTTCTCATATATGAGATCAGCAAACCTGTATGCTAAAATATTTATC   | 8293 | A_95_P096893 BP533806     |
| 8778 | 104 | 23 | 856  | CAAACGTACTACTTAGCATACTGTCTCACAGCTGAGATTGGGCTGGATTTCTTCTA    | 8295 | A_95_P295553 FG162573     |
| 8782 | 104 | 27 | 1572 | CTAATATCCGAATTTTATTGGCCGATGCATTAATGTTTTAGGCTCTCCGGTAAATTTG  | 8303 | A_95_P183652 TA13506_4097 |
| 8793 | 104 | 38 | 1655 | AACAAGAAAAGCAGGCTGTAATCTTCGCAAAGTTATTGAAAATTTTAGATCAAGCAG   | 8325 | A_95_P186097 TA14053_4097 |
| 8794 | 104 | 39 | 824  | AACTTTTTGCAAAGAACTTTCAACTCTAGGGACTGGATCTGGTATTGATCAATCTCT   | 8327 | A_95_P014006 EB426220     |
| 8795 | 104 | 40 | 217  | GGGAAAGTCAAGATAGTAATGTCGTATGTGTATTACATGTTCCACTTCAAACATGA    | 8329 | A_95_P092628 BP531905     |
| 8797 | 104 | 42 | 821  | CACTAGTGTGACAGCTCCGCGATTAGCCTTTGTGATGTCTGAGTCTATTTGTTGTG    | 8333 | A_95_P228144 FG161660     |
| 8799 | 104 | 44 | 312  | CAGATCAACAGAGAGCATGCTCTATTGTCACATTTCCAGAGAAGATTCGACATTATA   | 8337 | A_95_P067705 BP136944     |
| 8801 | 104 | 46 | 414  | GGTCGAAAAGGGTGTGGCCATAAAATTAGTGAAAAGTGATGAAATTAACATTCCGAC   | 8341 | A_95_P102722 CV016160     |
| 8804 | 104 | 49 | 1009 | ATTGTCTTGTCTTGTGTAGTAGACAACATGAATTCTGATTGGCTATGACATTGAACGA  | 8347 | A_95_P024901 TA15942_4097 |
| 8810 | 104 | 55 | 445  | TCTCAGTAATACAATAGGAGATTACGAGACTGTAACAGCAAATGTGGAACATGTCAT   | 8359 | A_95_P274518 AM835908     |
| 8812 | 104 | 57 | 123  | GAGCAACTTAATTCAAGAACTCTAGCTTTAAGCATGGCGAAAGTTTTGTATTTGTTG   | 8363 | A_95_P132247 EB432689     |
| 8813 | 104 | 58 | 827  | ACGGAAGTAGTAGAATTCTCCCTTGACATATGAATTTGCAGTAACTGATGCAATTG    | 8365 | A_95_P205492 TA18302_4097 |
| 8818 | 104 | 63 | 1309 | TCTAGCAAAGATTTTGGAAACCCCTTGACCACTGAGCTATGCTGCTTTTGGGTTGTGTC | 8375 | A_95_P191772 TA15309_4097 |
| 8819 | 104 | 64 | 508  | TGCTTTTGACATTTGATACATGACCAATATGGAGCTTCATTTGTTCCAGAATGTTGGTA | 8377 | A_95_P021411 TA21905_4097 |
| 8820 | 104 | 65 | 759  | GAAGACTACAAACTGTGCTACAAACATTAACGTGCTGTTAGATATGTGCATATT      | 8379 | A_95_P272426 EB679363     |
| 8823 | 104 | 68 | 590  | CTGTTTCTTTCCATTTTGAACCAGGGATCTGCACGGAACATATGAACACCTCTCTC    | 8385 | A_95_P237224 TC66546      |

|      |     |    |      |                                                             |      |                           |
|------|-----|----|------|-------------------------------------------------------------|------|---------------------------|
| 8828 | 104 | 73 | 884  | AAGAGAGAGCTTGCAAAAAATCCAGCTCTGGCTAATGAGAACTGGGACAGATTCTT    | 8395 | A_95_P268391 EB446004     |
| 8830 | 104 | 75 | 857  | ATTCAATATAGTGTCTTGTTCTGCCACCCACAGGAAGAGATCATGAGACTTGTATCA   | 8399 | A_95_P301838 FG163572     |
| 8832 | 104 | 77 | 247  | GGAATTAGGCTTACCGATTATCTGGTAAATTTGGGAACTAGTTTTCTTCTTTCTTTT   | 8403 | A_95_P001816 AJ718017     |
| 8835 | 104 | 80 | 1424 | CCTTGTTCTTAATGTTTAAGGTGAAAGCGTAACTCTGAATACTTCAATCTACATGTTTC | 8409 | A_95_P003256 TA12366_4097 |
| 8837 | 104 | 82 | 204  | TATGAGGACCGTTGAAAGCACTATCCCCAGCTTGGGATTTCTATTGTTCTTCTTTCTCT | 8413 | A_95_P212402 TA19829_4097 |
| 8839 | 104 | 84 | 586  | GGAATAAATGTCTGCCAATATGATGGTTTCAGTATTTTGC GGAATGTCCCACTTTTCT | 8417 | A_95_P207232 FG642695     |
| 8841 | 105 | 1  | 375  | CTCATGAGTTGTGACTCCAGATCCAAAAGGTATCAAATATTATGGGTTATGTTATTTT  | 8420 | A_95_P025321 BP535221     |
| 8846 | 105 | 6  | 863  | AAAGATAGTAAACTCTGAAGCTGCTGCATCTGCAACGTGATTGGTGTGCTTGTGGT    | 8430 | A_95_P296868 FG163431     |
| 8849 | 105 | 9  | 1446 | GGACAATCATGAAAGTGAATGAAAGGATCATCAAACAGGTGATCAATCAATTTGAT    | 8436 | A_95_P009696 AF097180     |
| 8854 | 105 | 14 | 617  | CCTGTGTTAGAACACTGGTTATTGTATTCTTTCATTTGTCATAGTGTCTTGTGACATA  | 8446 | A_95_P193682 TA15724_4097 |
| 8855 | 105 | 15 | 96   | CTTTGTTCTCCATTAGGACCAGAAAATAGTTACTGCTAATAATATTGGACTAAGACGTG | 8448 | A_95_P145692 EB449442     |
| 8857 | 105 | 17 | 695  | TTGTACGATCAAGCAGAGAAATTGAGGTCAAAGGCCCCCGTTTGAAGCTCATTCA     | 8452 | A_95_P151802 AB001422     |
| 8860 | 105 | 20 | 750  | TCGGTTTTGATTGAGGAAGCGAAAAGATTGTGTTTTTATGATGGCGTCGCATCAGATT  | 8458 | A_95_P146307 FG169607     |
| 8863 | 105 | 23 | 1080 | GTTACTGGGAGATGGGATAGAGGAAGTGATTGGAGTATTAAGAACTTCTATAGAGT    | 8464 | A_95_P206562 TA18545_4097 |
| 8866 | 105 | 26 | 754  | GGACAGTATAATAGAAGTCAGAAATCCTGATCTTACCAGTATTTTTGATAACCATGT   | 8470 | A_95_P015796 TA16305_4097 |
| 8873 | 105 | 33 | 816  | ACTCTGAACAGGAGAAAAGAAGGATGTTTGTAAACCGCTTGACCAAATGGGGTGATCC  | 8484 | A_95_P290093 DV161928     |
| 8874 | 105 | 34 | 1345 | TGATCCTTTGTTGAGCAAACATATAGGCTAGGTTACATATTTAATAAATCGTGACGGT  | 8486 | A_95_P021781 TA15435_4097 |
| 8876 | 105 | 36 | 1196 | AGTTTACTGTTCTACAACACTTGTGACAGTGGATTTATAACAGGAATTTCAAGAGCT   | 8490 | A_95_P249332 AM087458     |
| 8879 | 105 | 39 | 339  | AAGTTAGAGGAGAAAACATCAAGCTTTGGAGGCTGAGAAAATTCATGCGAGGAAAC    | 8496 | A_95_P094378 BP532685     |
| 8880 | 105 | 40 | 725  | TTCTCTTGAATATTACATTTTCAATGCTAAATTGTGTGAGAGTCTGCAGTTGGATTG   | 8498 | A_95_P013351 TA12160_4097 |
| 8889 | 105 | 49 | 873  | AAGTCTCCTCTGTATGAGATCACATTTCAAGTGTCTGTGATGTTGTAAGTCGTGCAAA  | 8515 | A_95_P258066 EB427958     |
| 8891 | 105 | 51 | 359  | AGGATGAGAAAATGAGCTCTTTAGACATCAGGAGATTGGGGAATTGATTGAGGTGGT   | 8518 | A_95_P207387 TA18729_4097 |
| 8899 | 105 | 59 | 759  | ATAAAGCAAATCACAGACATTGTCAGATCTCCGTTTGTATGCGGAGCTGTGCTGAGA   | 8533 | A_95_P225517 FG172171     |
| 8902 | 105 | 62 | 817  | TGCGCATTGTATATATTGCAACGATAAACAAGCAAGGTCATGTGGTTCCTTTCTTTT   | 8539 | A_95_P213042 TA19965_4097 |
| 8905 | 105 | 65 | 843  | TGCCATTTTCTTAGGCTGGTAGCAACTTTACCTCTAGCATACTGTTACGTGAATCAC   | 8545 | A_95_P186512 DV158504     |
| 8910 | 105 | 70 | 1090 | TTTTGGTGAATGCTTGTGTTGGTGTGTAATACTTTAACCCCATGGAAATACTACGTT   | 8555 | A_95_P014961 TA13160_4097 |
| 8911 | 105 | 71 | 716  | ACGTCCACAAGTTAGAAAATAGAATGATCCTCAATGGTCTTCCGTTTCCCTTCTAGAC  | 8557 | A_95_P161062 EH619773     |
| 8913 | 105 | 73 | 323  | TGGCCCTCATTGAGACTCTCAGAATTGACATGTTATACAATTGAAACTATGTAAAAC   | 8561 | A_95_P093153 BP532162     |
| 8914 | 105 | 74 | 837  | TTCAGTCTTCTAGTATGTAGCCTAAGTTGACATTTAAGCATCATTAATAATGTGCCTG  | 8563 | A_95_P246572 EH615692     |
| 8917 | 105 | 77 | 734  | CAGAGGATTTGCTTGTAGTAGTATTATATAAATACTTGAATGTAGCTCGGCG/       | 8569 | A_95_P286893 EB678541     |
| 8918 | 105 | 78 | 761  | TTCTTCTGTTTGGTGTAGATCATACCACAATCTGTTTGTCAAGGTATGGACTGGCCAT  | 8571 | A_95_P129287 EB428997     |
| 8922 | 105 | 82 | 480  | GGCTGTGAAGATCGATGCAGTTGATCTTAGCTTGTCTTTCTCGCTGATGTTGACTGTT  | 8579 | A_95_P172366 EH665352     |
| 8924 | 105 | 84 | 437  | GTTTTGACCAAATCTTAAACATGTCAAAGAAGTAATGAACCAAACCTTTTATTCGCCGG | 8583 | A_95_P205087 TA18205_4097 |
| 8932 | 106 | 7  | 353  | GTCAGAGCCCTTTGGTTTTATTTTTCGGTTTAGTCCGAGTGTCCGAGCAAGTTTTGAG  | 8433 | A_95_P082840 BP528603     |

|      |     |    |      |                                                              |      |                           |
|------|-----|----|------|--------------------------------------------------------------|------|---------------------------|
| 8936 | 106 | 11 | 95   | AATACTGAAAATGGGAAACAGAGGAAATGCCTGAGTGCGGGTTCCGGGGTAGAGAA     | 8441 | A_95_P070110 BP192522     |
| 8938 | 106 | 13 | 155  | GGCTGTGTTTGGGTTGTATTCCGTACATTATACTATCTTTTGCTTAGACTTTGGTTTAT  | 8445 | A_95_P154272 EG036058     |
| 8940 | 106 | 15 | 860  | TTTGTTC AAGGTCTGTTACACCTAGGTCTTCGTCTCCTTCATCATGAAGGACTACACT  | 8449 | A_95_P216047 EB681108     |
| 8945 | 106 | 20 | 720  | GTCGTGGGGTTATAGCAACAGATCAATTTTTGTACTTCTTGCAATTGTGTATGAGAA    | 8459 | A_95_P023031 EB678111     |
| 8948 | 106 | 23 | 765  | GTTGGATTGCTTTGACAGGTTTTATTGGTGTTC AAGTACACATGAAAGGAAACAT/    | 8465 | A_95_P097948 DV158066     |
| 8950 | 106 | 25 | 821  | TAGACGGAATCGTTTATACCGGTTCCAGCAGACGGAACCGTCAAAGTTTGAAAAGG(    | 8469 | A_95_P121097 DW001094     |
| 8955 | 106 | 30 | 846  | AAGTTTGTGTAGTGATAGCTGTTTCTCACTCTATCTGGGCATCTGGGCTGATAGCGTC   | 8479 | A_95_P255869 FG167225     |
| 8956 | 106 | 31 | 766  | GGAGTAATGACTGAGTGTGACACTGATACACCCATTGAGCATGTTCTCCATTGGAA/    | 8481 | A_95_P127932 EB427514     |
| 8957 | 106 | 32 | 794  | GGGCCTCTCTTTTTGTGTTGGTAATGACTTCATTTAATGTTCTTTCTCCAATGTTCA/   | 8483 | A_95_P185007 EB677651     |
| 8959 | 106 | 34 | 811  | CTCGTAAGATCTAAAAGTTGTTACTGTTGGATCATGCTTGTACTGCTCTTTATGTTCTA  | 8487 | A_95_P010371 AY074787     |
| 8974 | 106 | 49 | 503  | GAGCCAATAAAGGGCAGTGTAATATATGTATCTATGTCCATGTCTTTATCTCTGGA     | 8516 | A_95_P056976 BP134096     |
| 8976 | 106 | 51 | 956  | GTAAGTAGTGTTAAAGTTTCCAATGTTTTGATGGTGTCAAGTACAATTTCCGGAAGTT   | 8519 | A_95_P180222 TA12686_4097 |
| 8978 | 106 | 53 | 1455 | GTGTTTGCTTGGGTTTAGCTTTTGCTTATCGTGA AAAATTTACATTAGATCCTTGACCT | 8522 | A_95_P033364 AJ438616     |
| 8979 | 106 | 54 | 1462 | CCTGCCCCAGGGAGCAGTTAGTGGTAGTTGAAACTGCAAAAATTTAGTTTGTGTTGTC   | 8524 | A_95_P011736 TA15485_4097 |
| 8981 | 106 | 56 | 928  | GTCCGGCCAATTTTCAGTTTCATTGAGCTCATTGGTATAAACCGACACCTTCAGAAGT   | 8528 | A_95_P216527 TA20725_4097 |
| 8984 | 106 | 59 | 715  | ATGTTTGTTGATGTGGGGAGTTAATGTATGGGAGGAAAAGCCCAAATTAACAAAT      | 8534 | A_95_P161252 EH620000     |
| 8987 | 106 | 62 | 823  | TGTTTCTGGAGATACTGGATTCCGGCTCATTGCCCCTTCAGCTGGTACTGATATCTAC   | 8540 | A_95_P180407 TA12735_4097 |
| 8992 | 106 | 67 | 667  | CGGAATAATCAACTTGTTCCGAAATGAACTTTTCTTTCAAAGTAACCGTGATCAGTT    | 8550 | A_95_P124667 DW004448     |
| 9000 | 106 | 75 | 813  | GCTGCGCCTCCTTTAGTGATTGATACTGTGTATTAGTTATGTAGTATATAAATTGTG(   | 8566 | A_95_P128547 EB428246     |
| 9001 | 106 | 76 | 2524 | CTCTGTTGAGTTGAACTTTCCACCTTATACGACTATAATATCTTGAGAGGACTTTCTAC  | 8568 | A_95_P201612 D86506       |
| 9002 | 106 | 77 | 536  | TCAGGACAGAATATATACTAAGGCGGGCCCTGTCCTAATAGCAGTCAATCCCTTCAA/   | 8570 | A_95_P063800 BP135878     |
| 9005 | 106 | 80 | 735  | AGAGCGAGAAGAGAAGAAGCAGCGCCTCTTATTGAATCTGCATTTCAATGGCGTTTA    | 8576 | A_95_P128058 FG136848     |
| 9006 | 106 | 81 | 301  | TCATGGTAGTTAGCTTTCTTCTAGCTTCTCCGTTTTGTGTATGTACTGTAAAACTATC   | 8578 | A_95_P088823 BP530235     |
| 9008 | 106 | 83 | 422  | ACGCAGGTAGATGCCAGTTTCTCAATTATGTGGTGGAATATCTTTGTAGTAAATATA    | 8582 | A_95_P052616 BP132971     |
| 9009 | 106 | 84 | 605  | TCTAGCCCTGAGCTTTCAACTGGCGGAGGAGGTGGAAATATGGGAAAGAATCTAAA     | 8584 | A_95_P150072 FG143015     |
| 9011 | 107 | 1  | 350  | AACTACTGATGCAGCTGCAATTGATGCTGGTAATGTGCAAACGTAGCAACAAATTCA    | 8587 | A_95_P108782 CV019000     |
| 9013 | 107 | 3  | 460  | CGGATTGACATCCTTGCTGTATAAGTTTTTCTTCTTCTTGCTTAATCCAAATTAAGAG   | 8591 | A_95_P133352 EB441754     |
| 9014 | 107 | 4  | 447  | AAGGTCGTCTAACTCAGTGTACTTGTACTATGTTGATTGGTATAAGAAATAGACTAC    | 8593 | A_95_P024346 EB435685     |
| 9015 | 107 | 5  | 224  | TTGTCATGTATTACTGTAATCCGAATTAGTGATTTATTGAGAGTGACGATCGAGAAA    | 8595 | A_95_P122977 DW002871     |
| 9021 | 107 | 11 | 413  | ATTGGATCTTGAATGGCAGTTACTATAACAGATTACTGTACTTTTGTATCGTCAACAG   | 8607 | A_95_P121842 DW001947     |
| 9022 | 107 | 12 | 1003 | GGTATTGTTAGTACAATAGTTGATATTTGATGATTTCTGTCTCATATGTCATGCAGC    | 8609 | A_95_P024801 TA13396_4097 |
| 9023 | 107 | 13 | 477  | GAAGTTGATGCCACCATGTCAACCAGTAGGTTGAGATATAATTGATTTTCTTTAAAT    | 8611 | A_95_P123227 DW003095     |
| 9025 | 107 | 15 | 1174 | ATGATGCCGATGATGATGCTGATGATGCTGATGACAAGTTGGAGTCCAAGGATGAT(    | 8615 | A_95_P240269 EU984501     |
| 9026 | 107 | 16 | 539  | CATAACCATTCTGTTGGTGTATTGATTCTATAATGCTCTTATGTTTTGCTCCAGGAA    | 8617 | A_95_P024706 TA16508_4097 |



|      |     |    |     |                                                             |      |                           |
|------|-----|----|-----|-------------------------------------------------------------|------|---------------------------|
| 9027 | 107 | 17 | 909 | GAAGCACTGAAAATGGCAATCTTTTGCCAACTGATAGCAACATACCATTTTTGGTAA   | 8619 | A_95_P009086 TA13860_4097 |
| 9029 | 107 | 19 | 829 | TGCCATCTCATGAGTTCCACTCAACTATTGTTGCATATTGTGTTCTATTGCACGTCGAC | 8623 | A_95_P236294 DV160047     |
| 9030 | 107 | 20 | 884 | TTTGGCATGTTGTGCATGCGTTTGCTTTCCTTCCCAATCCGCCTTGCTCTTTGAAGTAA | 8625 | A_95_P190882 TA15109_4097 |
| 9032 | 107 | 22 | 844 | ACAGTGTCCGCTGCTATTGCTTGATACGAGAATGCCTTATGGAAGCTTGCAATTGGI   | 8629 | A_95_P253799 DV999942     |
| 9037 | 107 | 27 | 646 | AGCTAGCCCTGCGATCGTCGATCAGTTTTGTGGAAAACAAAAAGGAATATAAGGACI   | 8638 | A_95_P295188 FG200595     |
| 9039 | 107 | 29 | 751 | AGATGAGGAGTGATTTATGCTTGTTAGATTGTTGTTAGTTGGATTGTTGTTTAGTT    | 8642 | A_95_P161417 EH620171     |
| 9045 | 107 | 35 | 678 | TGGTTTATGGCTTTTTCTGTACATCTTGATACAGTAATATCAGTGTGCTGGTTTTCTI  | 8654 | A_95_P178492 TA12264_4097 |
| 9049 | 107 | 39 | 547 | TATTTAAGTGGAGAAGAATAGAGGGTCAAATCCGACACTACTCGTGACTTTGCAGCA   | 8662 | A_95_P070725 BP525523     |
| 9063 | 107 | 53 | 502 | ACATGAATGTGTTGATGCTTGTGGAGTTGGCAGGAACCTGTGGGATTTCTTCTGATC   | 8690 | A_95_P082155 BP528444     |
| 9068 | 107 | 58 | 428 | TAGGGAGTTCGAGGGAGCACTTTATTTCTTTTTATTATCAACCCCACTTCTTTGTTTTA | 8700 | A_95_P279278 AM788929     |
| 9072 | 107 | 62 | 442 | CCTTGTTAGTAGGCCACTCTAGTGTGCTTTGTTTTGATTTGTTTTATGTATTAAC     | 8708 | A_95_P015331 TA13462_4097 |
| 9076 | 107 | 66 | 524 | AACCAGCAAGGACTAGAAGAGCTGAAACCACCAATCGTGTTACAGGAGTTTGTACT    | 8716 | A_95_P039076 BP129446     |
| 9077 | 107 | 67 | 741 | GAGGGTTGACTTTGTGCCTGTTGGGAGAGATGGTGTGATACTCATGCCTCAAATAT    | 8718 | A_95_P277588 FG173377     |
| 9083 | 107 | 73 | 203 | TGCTAGAAACGCTGTTCCCTCTCGGAAGATGGGAATAACCAGCATATATGGGGCTAT   | 8730 | A_95_P107597 CV018459     |
| 9088 | 107 | 78 | 610 | GCTTGTTCTTTCTGTGCTTGGTATTGAAGTTTAGTTGCAAGTAGTAGTACTTTTGTTT  | 8739 | A_95_P143197 EB446542     |
| 9089 | 107 | 79 | 808 | ATTCAGTTTAGATGATGGTGGGATTAGCAGTCTTGTTGGGATATGCGCATTGTGGG    | 8741 | A_95_P289668 FG156027     |
| 9090 | 107 | 80 | 280 | GCTCTACTGCTCAACAATTGTCGGCTTTCCTATCTTAATCGTGGCTATGATTGTAAC   | 8743 | A_95_P085350 BP529258     |
| 9094 | 107 | 84 | 317 | CCTGATATTTAGTGCTTAATGCATATGAATATTTTTCTTGAAATAGCAAGGAGGCAC   | 8751 | A_95_P130842 EB430948     |
| 9097 | 108 | 2  | 789 | GGAACGTGGTTACTGTTAGCTTTTATATTTTTGATGTTATTGTCTTCTATGGAAGG    | 8590 | A_95_P124757 DW004568     |
| 9103 | 108 | 8  | 343 | ACAGCACCGTGACATATGCATCATGGTTATACAATTAAGTGGGATGTAATATACTT    | 8602 | A_95_P160227 EH618903     |
| 9109 | 108 | 14 | 711 | ATAATAACAATAAATCTTCACCTCCATCAAAATCCTCAAATCAAATGGTGGTTCGCC   | 8614 | A_95_P127312 EB426829     |
| 9110 | 108 | 15 | 847 | ATGACATGCTTCCTGAGGAGTACACATTCAAGGATATTATTGGCAGCATGGGACCTA   | 8616 | A_95_P206502 EB425509     |
| 9117 | 108 | 22 | 194 | TTCACTCAAATCTTCAATGGCTACTAGCCATGGGAATGTTGGGAGGTATAAGGGGGT   | 8630 | A_95_P113582 CV021207     |
| 9119 | 108 | 24 | 728 | TCCTCCTATCTCTGCACTGCCTTTGGTCTCTCCAAATGTTAAGATTTATGGCGCTC    | 8633 | A_95_P217542 D26509       |
| 9123 | 108 | 28 | 830 | TGGTTGATTTCATATAGGCAATCCATAGCAGTGTATCCAAATATGAGATTTTCATAGCA | 8641 | A_95_P261741 EB437528     |
| 9125 | 108 | 30 | 384 | CATAGATACATGTGATGCAGGCAGGCTCTTATTGTTCTCTATTTAGTAAGTACTCTC   | 8645 | A_95_P133647 EB435274     |
| 9128 | 108 | 33 | 646 | TTGAGTATCAACTGGTGCAGCCTTGTTCAAAACAACCTCGTATCTTATCATCATGACCT | 8651 | A_95_P315638 FG181325     |
| 9135 | 108 | 40 | 895 | GGGATTATGAGTGCAATGGTCTACATAAGCACTCTAAGGCTGTTTCCAGTGGTAGTC   | 8665 | A_95_P249077 EB680583     |
| 9138 | 108 | 43 | 797 | AAGATTATCAAATGGGTTGCCCTTGGGACAGTATTTTGGAGGTAAGGTTAAGCAGC    | 8671 | A_95_P212057 TA19748_4097 |
| 9143 | 108 | 48 | 562 | CTGTCTCTACAATTAGCATCCACAGGGAAGATGTAAGCTAATACTACTGCAGCAAT    | 8681 | A_95_P037751 BP129085     |
| 9145 | 108 | 50 | 280 | ATTGTATCATTACATTTCTGATTGCTACCAATTGGTGAAGTGTGGGACTTTCCCTCCT  | 8685 | A_95_P090988 BP531163     |
| 9146 | 108 | 51 | 480 | GAAGCTTTTTACCGGATCCAATTAGCATAGCAGAAGGTTTTGTTTTTGTACATGCA    | 8687 | A_95_P276448 AM783542     |
| 9150 | 108 | 55 | 250 | TTTAGAGATGTCACTAGTGAACCCAAAAAGTTAGAGAACCTGCTTTTCTGGGTACTC   | 8695 | A_95_P108572 CV018903     |
| 9152 | 108 | 57 | 494 | CTTGCACTTTGAACGTGAAGATATGTTGAGTTCCTTAGTTTTGTCATCTTTTTGATG   | 8699 | A_95_P013161 EH621686     |

|      |     |    |      |                                                              |      |              |              |
|------|-----|----|------|--------------------------------------------------------------|------|--------------|--------------|
| 9156 | 108 | 61 | 1849 | GTGGCTAGTTAGTATTAAGTGGATATTAAGCGAAAGGAATGCTTTCCTAGTTGTAA     | 8707 | A_95_P239639 | AY578143     |
| 9157 | 108 | 62 | 272  | GTGGTGAATATGGTGGCCTTTTGCATGCTATACCTACAATAACCAAGGCCAAGCCAA    | 8709 | A_95_P107747 | CV018516     |
| 9158 | 108 | 63 | 1564 | ATGTGAACTTGTCAATTATCTCCTGAGGTGAAAAGAGTCCTTCAGGGAATAGTTTAAA/  | 8711 | A_95_P234194 | AF127243     |
| 9161 | 108 | 66 | 794  | ATGTAGGCCACGTTTCTACATTGTTCTTCCATTGGTCTCTTTGTTTGTAAATTGC/     | 8717 | A_95_P185527 | DV999353     |
| 9164 | 108 | 69 | 99   | GGCGTCATGATACGTAGGCAATCCCCATCGATTTCGATCATAGCCATAAACAAATTG,   | 8723 | A_95_P055041 | BP133595     |
| 9165 | 108 | 70 | 787  | AGCCCTATGACAAGTCTTGAAAGCAGCAGATGCTGACTGACTTGATGCTTTACTT      | 8725 | A_95_P162942 | EH621932     |
| 9166 | 108 | 71 | 115  | AATACCACCACAAATTGGTGAAGTGAATGAGATTTTCAAAGGATCTAGCCGTGCTTG    | 8727 | A_95_P036413 | BP128725     |
| 9171 | 108 | 76 | 597  | AGAATTTCTAACCTGGTTGGTCCCCTGCTAGGACCTAAAGAAAGAGCCAACCTTCT     | 8736 | A_95_P018341 | DV159141     |
| 9175 | 108 | 80 | 665  | ACAGGCTGGATGGGTGGTTAGGTTCCGCTTTGGAATTTATGAATGTAAATATATTTG    | 8744 | A_95_P024081 | EH617846     |
| 9178 | 108 | 83 | 367  | GTCGTTTGTGGAACAAATACTCGATTTTATGAGTAATACGAGCCTGAGATTTTGGTG/   | 8750 | A_95_P097383 | FG639624     |
| 9180 | 108 | 85 | 423  | TTGCTGCTGTAGCCAAGTAGGATAGTGCAAAATAATTCTTTTTTCGTTTCTATTTCTGC  | 8754 | A_95_P143002 | EB446397     |
| 9181 | 109 | 1  | 864  | GGCTAAACTTTTTGTTATAGTGAGAGTCGTCATCTTCTATCACTGATTATATACTGGTC  | 8755 | A_95_P204382 | DV158532     |
| 9182 | 109 | 2  | 831  | AAGTCATCTCTGAGTCTCCCATGAGTCTCAAGCAAACAATCGCAGTGCACTAGTCAT    | 8757 | A_95_P293293 | FG162163     |
| 9185 | 109 | 5  | 653  | AAGCTGTCAGCATATTTGTTGTGTAACCATATTCTTGAGATCTTTTCAGCCATAATTAC  | 8763 | A_95_P154862 | FG644355     |
| 9186 | 109 | 6  | 202  | GGCGCGTCTAACAAAATATTGGATATCTTTCTTTGGTTACGTTTGATGTTAAACATT/   | 8765 | A_95_P113677 | CV021254     |
| 9190 | 109 | 10 | 403  | GTCAGTTTTGATGCAATCCTGGTTGGATAATGGTCTTATTCTATTTAATCTGTAGTCTT  | 8773 | A_95_P110707 | CV019867     |
| 9197 | 109 | 17 | 810  | TTGGGCAACTAGCTAAGTTACATGGATGCTATGTTGTAGGAAGTGCCGGGTCGAAA(    | 8787 | A_95_P118562 | DV161665     |
| 9198 | 109 | 18 | 634  | ATTGGAAGTAGAACACCTGAGAAGCGTACTGCAGCTGGAGAACCTAAATTAAGCTTC    | 8789 | A_95_P062390 | BP135507     |
| 9205 | 109 | 25 | 469  | GCTGATTTGGGCTGTAACACGAACTTATCGATATATAGAATACAAGTTGGCTTCTCCT   | 8803 | A_95_P002726 | CV018667     |
| 9207 | 109 | 27 | 2345 | CAGAAAATAGTCTCTCGTATTATCTGCACAGACACACAACAGGCCAAACTTCCATCTT   | 8807 | A_95_P257816 | AB289457     |
| 9211 | 109 | 31 | 613  | TTAGATGCAACTGGGAAGGAAGAATTGGGTACTGAATCTTATCTGAATGAAGAGTTT    | 8815 | A_95_P228444 | DW004322     |
| 9212 | 109 | 32 | 640  | AACTTTAGCAATTTCTCCACTTACTAATGATCTTGGGCACAGAGCCCCGGATACAAA    | 8817 | A_95_P304613 | FG152078     |
| 9213 | 109 | 33 | 486  | ACTCTATATCATGCCCTGGTCGTTCAATGTAGTTGCTGTTTCTTCTTCAATACCAGAA   | 8819 | A_95_P214452 | TA20266_4097 |
| 9218 | 109 | 38 | 77   | GCTCTAAGGGTTTGAACAAAGAAAACCTTTTGGTCGTCGATTTTGATGATGAATAAG/   | 8828 | A_95_P003976 | FG199117     |
| 9219 | 109 | 39 | 863  | TTCTTGAGATATATCAGCAAGTTGCTCCCGCTGCTTTGCCATTACTGAAGAACTCTGA/  | 8830 | A_95_P271306 | FG133114     |
| 9220 | 109 | 40 | 786  | ATGATGTGTAAACTGAATTCACGACCAGTAATGGCTTTTCGTCCTCACTTTTATGTT    | 8832 | A_95_P248482 | EB451478     |
| 9221 | 109 | 41 | 439  | GTATATATTTCTTAGCCTGCTTAATATTTGTAATCTTAGGATGCGTTGTGCATCTGTAC  | 8834 | A_95_P028196 | TA19070_4097 |
| 9222 | 109 | 42 | 512  | ATCCATATATACACGTGTAGACTTTTTTGGACTCGTGATTATTGAAACCAGACTTGCT(  | 8836 | A_95_P028296 | TA17676_4097 |
| 9225 | 109 | 45 | 1539 | GATAACCTTTAAATGTGGTCCGGTCGGAAGCTATTGGTATTTGCATGCATTTCCATTCT. | 8841 | A_95_P017736 | TA14955_4097 |
| 9228 | 109 | 48 | 1083 | GGTAGAGTTAGTTTTGTGCTGTTCTTTTAAAGAAATCCACATATGTAGTTTGTGTGTTAA | 8847 | A_95_P176392 | X92443       |
| 9231 | 109 | 51 | 1131 | TGTTTCTGTGAACCTGGGGAGGGATGCACAGGGTTTTATTGTGAGCCACAGTATTT     | 8853 | A_95_P258551 | AF352797     |
| 9235 | 109 | 55 | 350  | GGGCCTTGGCAATTGAATGACTTCTTTATTGAAGTTAAAGAAGTTGCATTTCTACAT    | 8860 | A_95_P027916 | BP530550     |
| 9236 | 109 | 56 | 851  | GCCAAATTTTGGTGCTCTGTGTATCTGAGTTTTCTACCCTTCTATCAACCTTAACT     | 8862 | A_95_P224582 | DV158521     |
| 9239 | 109 | 59 | 523  | AGAGGCTCATGTACTTAGTGACACCCTCGTTTTGGAAAATTTCTGTATTTAGTTATGA/  | 8868 | A_95_P308333 | FG642090     |

|      |     |    |      |                                                             |      |                           |
|------|-----|----|------|-------------------------------------------------------------|------|---------------------------|
| 9241 | 109 | 61 | 756  | GACAGCTTTGTCCAACAGTTCAATGATGCCTTTGTTTTAATATATACTACTATTTCCCG | 8872 | A_95_P017146 TA14623_4097 |
| 9244 | 109 | 64 | 554  | TTCTTCTGCAACGTAAGTACTGCTGCATGGCAGAATATATTGGTTAAGGGTTGATCTTT | 8878 | A_95_P248272 EB678649     |
| 9246 | 109 | 66 | 818  | TTGATTTTAGTTTGTGTTGTCTCCGCCTGCAGTTGTGTATGCCTTCCCTCTTATGG/   | 8882 | A_95_P144642 EB443735     |
| 9247 | 109 | 67 | 451  | GACCGGACTGGAGGACTATTTCTCAAAGTAGAATATCCCTTCTGAAAATTTGTGTAT   | 8884 | A_95_P110517 CV019760     |
| 9251 | 109 | 71 | 291  | CAGTGCTATAGCAAATCTACTCTGATGCAAATTAAGGACTAATGATGGTCCGTTTAAT  | 8892 | A_95_P001626 EH623740     |
| 9252 | 109 | 72 | 560  | TCGCGGGCTCCCTATTTTGCAATTTTATAGATTGTTTGAGCATTATGTGGCATTGCA   | 8894 | A_95_P210922 TA19498_4097 |
| 9262 | 109 | 82 | 562  | AGTTGATTAACAAGTACAGGGAAAATCGTCCCAGAGTGAGGATGAGGTGGTGATC     | 8914 | A_95_P038006 BP129155     |
| 9265 | 109 | 85 | 792  | TGATTACGTCTGTTATGTGTTGTTCTGATTCACCTGGTATTCTATCCTATATTACATGT | 8920 | A_95_P151122 TA15633_4097 |
| 9272 | 110 | 7  | 1007 | CGCCTCCAAAACCTTGAATCGACTATTGTAATTGTGATGTTAATTTTCATTCCCCCTT  | 8768 | A_95_P012596 TA14366_4097 |
| 9274 | 110 | 9  | 1457 | AGAAAAGACTACTGAAGTGCTTGGTGAGGGAGGATCACTTACGTACCTCACATTCA    | 8772 | A_95_P259441 TA12251_4097 |
| 9279 | 110 | 14 | 1781 | CCATGTTATGTATTGTGCTCATTATTTGTTTTGTATGTGCGACCCGCGAGCTAATTCTT | 8782 | A_95_P180572 AF220611     |
| 9282 | 110 | 17 | 829  | ACGAGTGCATGACAGCTTTTGAAAAGTACTCAGTACTTACACGTCGTAATATCAAGA   | 8788 | A_95_P020871 EB678158     |
| 9284 | 110 | 19 | 707  | CTTAAGCATCCCCAGGCGATGAGATCTATAGAAGTGGTACACTGTCAATGTTTGAG    | 8792 | A_95_P127772 EB427345     |
| 9286 | 110 | 21 | 543  | TTTGACCAGCCATATGATAATCTATGTAGTAGTTAGTCTCTTATCTATTGCCTCTTGAG | 8796 | A_95_P260276 FG643134     |
| 9288 | 110 | 23 | 797  | ACATAAAATCGAAAGATGCAGATGGCCGACCTGATGAAGAAGTTGCAGATGAGTAT    | 8800 | A_95_P159197 EH617159     |
| 9294 | 110 | 29 | 811  | CTACAGCACCAAGTTGATGAGGGAAGATGGAGGCTACGAAGTCATTTTGAAGGCTA    | 8812 | A_95_P269472 EB425343     |
| 9295 | 110 | 30 | 161  | CTAGTGGTAGTAAGGATATTGATCAGAAGAGTCCCAGGATTAAGTCAAGAAAAGGG    | 8814 | A_95_P133622 EB435254     |
| 9297 | 110 | 32 | 486  | GTTGAACTTAGGTGTAGCTATTCGCTGGTAGCCTGATTCCAGATTGTGTACCATGCT   | 8818 | A_95_P060220 EB428797     |
| 9298 | 110 | 33 | 746  | TGTGTCGAAACAGAAGGACATATAGCTTGTGGGCTCTCAAGTGGTGGTATAGCTTTG   | 8820 | A_95_P311743 FG144289     |
| 9302 | 110 | 37 | 457  | TGGCATGCTGAAGTCATATTGTATCACTATTTATGTGCTTATCGTTGATGCCAGACAA  | 8827 | A_95_P114597 EB678991     |
| 9303 | 110 | 38 | 792  | AAATTGAGATGCTTCTTAGAGAAAATACCATTCTCAAACGTGCTGTTCCATCCAGCA   | 8829 | A_95_P018356 DV159715     |
| 9304 | 110 | 39 | 632  | ATGTCATGGAATACAAAGCCCATGATGCTTCCCTTGCCTGACAACCTCATCATACCGCA | 8831 | A_95_P271871 EB445862     |
| 9305 | 110 | 40 | 368  | TAGCAGGGGCTACTCAAGGTTGTGATTGCAGGGGTTCTCTCTTTTTTGAACCTTTT    | 8833 | A_95_P152512 EB443661     |
| 9310 | 110 | 45 | 486  | GTTAGCTGACTGGGAAGTTGTTTCTTGCCTTACTGAATTATCTATCTTCTCCAG      | 8842 | A_95_P106827 TA14707_4097 |
| 9311 | 110 | 46 | 793  | GAGGAACTCTCGTGTCTTGTTCCTTCTTACTGTAAGACATTATGGTCACATTTAAA    | 8844 | A_95_P244592 DV160610     |
| 9322 | 110 | 57 | 729  | TCTGAAACATCGTGTGGGACATAGAGGTAAGGAAATACATTTGCTTCTTGAATC      | 8865 | A_95_P232759 DV160268     |
| 9324 | 110 | 59 | 741  | GTTGGTAAGAGCTGAAAACATGATGCGGGCCATTACATATGCTCGGAAATATCTTGC   | 8869 | A_95_P136847 FG139248     |
| 9326 | 110 | 61 | 729  | TAGATCCTCGTCATTTGGAAGCACTAGGAGTGATCCTGCTGATGCATGGAAGATTTG   | 8873 | A_95_P316758 FG193831     |
| 9329 | 110 | 64 | 570  | GCAGTACTATGTACTAGTTAAGATAATAAGACCAAACCTGGTGTGGTTTACAAGTGT   | 8879 | A_95_P263651 FG644694     |
| 9331 | 110 | 66 | 875  | GGCTGTCAGATTTTGTGCATGTGGATATGTCAATTTTGCCTCTCTATGAAGTTTCTA   | 8883 | A_95_P200602 EB443292     |
| 9332 | 110 | 67 | 795  | CAGAAAACAGCCCAAATACTGATGGCATAACATAAGCAAATCTAACACTATAAAAC    | 8885 | A_95_P214532 TA20282_4097 |
| 9334 | 110 | 69 | 1879 | GCATTTATAGCTCAAGGCTGGCTATCAACAATGGCTTAATTGAATTTAATACTACTTA  | 8889 | A_95_P190307 TA14985_4097 |
| 9340 | 110 | 75 | 581  | TGCTAGAATTTTGTGGTTTGTGAGTCCATTTTGGAGCTCGTTGTGAGATCTGCTCGAA  | 8901 | A_95_P160942 EH619629     |
| 9342 | 110 | 77 | 845  | ATGGTGCAATATCTCTGTTTCTTGTGTTTGTGTTTGTGAGAGGTTGTAGAGCTTCTGTA | 8905 | A_95_P243177 EB426408     |

|      |     |    |      |                                                             |      |                           |
|------|-----|----|------|-------------------------------------------------------------|------|---------------------------|
| 9344 | 110 | 79 | 819  | AACCAGCTGAGATCTAGTCGAACTTTTGTATCGACATCATTTTGTCTGATCATCATTCI | 8909 | A_95_P236134 DV160005     |
| 9353 | 111 | 3  | 1470 | CCGTGAAATCACTTCCTTAATCTTGACTTTGTTGTGAGTTTAAATATGAAAGAGCCTTC | 8926 | A_95_P193507 TA15688_4097 |
| 9354 | 111 | 4  | 89   | ATTGTTCTCTGGGTGGACGTAGGATTATTTGATCCGAACTACGTTAAATCTTGTTI    | 8928 | A_95_P064595 BP136093     |
| 9355 | 111 | 5  | 768  | CCTAGAAACTGCTGTATTCTTCGTCCAGTTAGTTGATAAATAGCCTTTACCCTTTC    | 8930 | A_95_P188557 DW003989     |
| 9356 | 111 | 6  | 450  | ACTCTCATAAAAAGGGGTTCAAGTGCATATTCGATCGAGGAATTCTGCATCTGTATTT  | 8932 | A_95_P132607 EB433168     |
| 9359 | 111 | 9  | 877  | TTGAGAAAAGATCAAGAAATGCACCAGTAGGAGTTCCTCCCAGCAAGCTTTGAGTTC   | 8938 | A_95_P191782 TA15311_4097 |
| 9371 | 111 | 21 | 774  | GGAAGATTTAACACGAGTTTTTCTCCTTCTTCTTCTACTTTTCATTGTTGGTTATGAC  | 8962 | A_95_P217802 EB677687     |
| 9376 | 111 | 26 | 796  | GTCGGGATAAGTTATACTGGTATAAGTTATGCTGGGATTAGTTATGCTAGGATTGTT   | 8972 | A_95_P208567 EB451348     |
| 9379 | 111 | 29 | 792  | ACTTTTGCTTTTGACAGAGGGTATTAGAGCCTTGTAACAGGAACCTTGAGATGCT/    | 8978 | A_95_P012186 EB439152     |
| 9380 | 111 | 30 | 673  | GCATGTAGTTGGAGTTTGCAACTTGCAATTGCTTTCTTGTGTTTCTTATTACTTTGGAA | 8980 | A_95_P197947 EB438995     |
| 9381 | 111 | 31 | 345  | CCATCTCAAATCTTTTGACAAGGTTTGTGTTGATGTTGTTTCATGGTTTTTCTGTTTG  | 8982 | A_95_P006491 FG625247     |
| 9385 | 111 | 35 | 1385 | CTCCATCTCCCTTAGTGTGTAACCTTTATGTAATGAACTACCAGTTCTAAATTATGTC  | 8990 | A_95_P185997 AY660024     |
| 9387 | 111 | 37 | 840  | TATAGCTCTGATGTATATGGGATGCTTATCATCGATCGGCAGCGCAGTCTTGCAAGG   | 8994 | A_95_P297853 FG163881     |
| 9392 | 111 | 42 | 1937 | GTTGAGCATTATATATGTTCTGGGGTTCTGCTAAGTCTACCTGTTATCATATTCTGGCI | 9003 | A_95_P018476 TA16281_4097 |
| 9394 | 111 | 44 | 581  | CCCTTAGCTTGATGTATTTGTTGTCTGTTAAGTCATTACAATGCCAATTCTGAATCI   | 9007 | A_95_P285843 TC55285      |
| 9400 | 111 | 50 | 99   | ACAGAGTTGGAATAAGGCTTTCCCATTTGCAAGTACATGGAATCAGGAGACTCAA     | 9019 | A_95_P215517 DQ460062     |
| 9402 | 111 | 52 | 581  | TTTGAACATGCAGGTCTATGTTTTCTGCTCCTTTCTTTTCCCCTTTCTTGAAGGGA    | 9023 | A_95_P001196 DV999385     |
| 9407 | 111 | 57 | 471  | AGAGCAAAATTTGCATGTTGATTAGCATTCAAATGTGATTCTGCACCAGTTCAATTG   | 9033 | A_95_P252809 EH621250     |
| 9412 | 111 | 62 | 529  | GTAGCTAACTCTATAGAGCTTATGACTTGTACTACCGGGATTTAGGAATATGTTCAAT  | 9043 | A_95_P300058 FG643213     |
| 9415 | 111 | 65 | 824  | CAGATATTCGCTTGTTTGTACCCTGATTAGGTTTGACGAGGTGTATGCTGTCCACTI   | 9049 | A_95_P123342 EB450387     |
| 9416 | 111 | 66 | 582  | CCTTAGCTTTGATGTATTTGTTGCCTGTTAAGTCGTTACAACCTCCAATTCTAAATCI  | 9051 | A_95_P028026 TA11882_4097 |
| 9419 | 111 | 69 | 593  | GTGAGTTATGAGAGGAAAAATTGAGGTATTTATTGTCATGTTATCAGGCCTTTGCCA   | 9057 | A_95_P005253 TA15502_4097 |
| 9420 | 111 | 70 | 796  | CAGACTGATAAAAATACCCATTTCTAATGGCTTTAGAATATTGTAGAAGATAGGGCI   | 9059 | A_95_P148657 EB678062     |
| 9423 | 111 | 73 | 202  | GGCATTACCTGCAGATTCTGTTCCCAGACATGGTTTTCAGGTTGAACTTTGTCGTTI   | 9065 | A_95_P066715 BP136669     |
| 9426 | 111 | 76 | 695  | TAAAAATGTCCTAGAGGCTGTCTATAAAGAGGGGAGGACTCCGTGCACTTTATCGAGC  | 9071 | A_95_P298423 EH620917     |
| 9428 | 111 | 78 | 1053 | CCTTCTAAAATCAACTATGAAAAGCGAATGATCAAGATGTTGGAGAAGTCAAAGTCG   | 9075 | A_95_P210712 TA19454_4097 |
| 9437 | 112 | 2  | 405  | CCCCGATTCCTCTGCTGTAGTGGTAAACACATACTACATTAGCTTAATCTTTACTGTC  | 8925 | A_95_P130917 EB431042     |
| 9439 | 112 | 4  | 752  | TTGTGAATACAACGTGAAATTGTTGTGTCTGGTCTCAATAAAGGCGGCTCTGGCC     | 8929 | A_95_P211797 TA19692_4097 |
| 9441 | 112 | 6  | 527  | TGAGCTTCATAAGTTTATGTAATTGATTAGGGCCTCATGAATCTTGAAGTGCCTATTG  | 8933 | A_95_P216397 FG628560     |
| 9442 | 112 | 7  | 176  | GAAGGCAGGTTTATTGACAGAGGTTCTGATTCTGTAGATTTCTTACTGATAGTACTTT  | 8935 | A_95_P134857 EB437723     |
| 9443 | 112 | 8  | 279  | TTGGGTACTTGGGGCTGAAAAATGTTAGGTTTCTAAGTTTTTCTGTTCAATGATGT    | 8937 | A_95_P000091 AJ717873     |
| 9445 | 112 | 10 | 429  | CTGGGAGGACATTTCACTTTCAATTGATGAATACTCCACATTTAGATTTGATACTATCC | 8941 | A_95_P064445 BP136053     |
| 9446 | 112 | 11 | 258  | CTGACATCAACTGAAAATTTGAATAATCGGTACTTTCTAGGGATAAATCACTAGGTT   | 8943 | A_95_P114647 CV021703     |
| 9447 | 112 | 12 | 828  | AAGTACTTGAAGTTGTTGCAGGCACTAAAGGCATCACTGACATAGACCAACTGGGCA   | 8945 | A_95_P295933 EB448824     |

|      |     |    |      |                                                              |      |                           |
|------|-----|----|------|--------------------------------------------------------------|------|---------------------------|
| 9459 | 112 | 24 | 900  | CACAGTTTCGAGCTTCCTTGTATAGACTATTAATTTGTAGACAGTAAACCAAATGAAG   | 8969 | A_95_P124727 TA21470_4097 |
| 9462 | 112 | 27 | 663  | AATTCTACATTCAGGTTGTCACCTTTTTAGTGATGAAAAACGCGACTTCTGGTCGTGA   | 8975 | A_95_P124137 DW003984     |
| 9464 | 112 | 29 | 1724 | TGTAATCCTGTACATAGTTGGTCCTTCAATTTATATTGTACGCAAGAATCTTCTGGA/   | 8979 | A_95_P197307 TA16534_4097 |
| 9470 | 112 | 35 | 1457 | GAGATACTATTCGTTTATCGCATGTATTAATAAATGTTTATCCGTCTCTGATGTTGGA(  | 8991 | A_95_P187577 TA14378_4097 |
| 9476 | 112 | 41 | 600  | TTTTACAGCAACAAATTGAGGTTCTGCAAAACCAACTCAAGCTTTTAGAGAACCCAA/   | 9002 | A_95_P273046 EB681049     |
| 9478 | 112 | 43 | 1314 | CAAATTATTCTTGAGAGCTAGGAAAAGAATACTTTGGTTTATGTTGAGATCCCAGGG`   | 9006 | A_95_P197722 TA16625_4097 |
| 9481 | 112 | 46 | 880  | GCTTGAAACATTTCACTAGCCATACTGATGTTGTTTCATGTTTACGTTCTGTCTTTGAA  | 9012 | A_95_P227609 EB427794     |
| 9482 | 112 | 47 | 653  | TGATAATACAGTCGCATGCACCCATCCATTTCTCCATCTACTTCTGAAATCCTTTAATC` | 9014 | A_95_P270876 FG195996     |
| 9483 | 112 | 48 | 187  | ACTCCATATCTTGGGATGGTTTACGTTAGATGTTGGATTTAGTCTTATTACGGTTATC   | 9016 | A_95_P129697 EB429659     |
| 9487 | 112 | 52 | 467  | GGAGGAGCAGTTGATTTAGCAATTTTAGTCTTCATCTATCTGGTGTTCATCCATTT     | 9024 | A_95_P028106 BP528067     |
| 9490 | 112 | 55 | 735  | CAGGCACGAGATTAACCAACAGGCACGAGATCCTAGAGTTAATTATTTATTTGAAT     | 9030 | A_95_P159542 EH617797     |
| 9497 | 112 | 62 | 191  | GTTTGATAAGTCTCTTTATGTTTGCCTTCTTTGCAGATTATTGATCTGTGGGAGAA(    | 9044 | A_95_P133922 EB435631     |
| 9498 | 112 | 63 | 1519 | GATGAGGATTTGTAGCTGTATTGCCTTTATGTTTGATGAGTAGCGAACTTATTCGTCT   | 9046 | A_95_P207837 TA18831_4097 |
| 9501 | 112 | 66 | 216  | AAAGGATGTTGTTGCTCCAACCATTGCACATAAGATTAATAACAACCTCTCTCTCTC    | 9052 | A_95_P220637 TA21650_4097 |
| 9506 | 112 | 71 | 872  | TTTTTGCTTCTTCTACCTATGGGGATATGGGGAATCACTATTCTCCCATGCCTGTCTGC  | 9062 | A_95_P246232 EB451951     |
| 9511 | 112 | 76 | 1012 | GGGAAAAACCTGGTCCTTCAGAGGAAAAATTTCCATGTTGCAAAGAACTAGGGG(      | 9072 | A_95_P171511 EH665158     |
| 9513 | 112 | 78 | 875  | ATATTTTGATGGCATTACGTTTTCTTCAGCAGAAATGCAAGCCAAGCTTGATAGAAA    | 9076 | A_95_P227814 EB426348     |
| 9515 | 112 | 80 | 739  | GCTGCAGTTTATGTTGACTAAGTGATTCAGCTGTAAAGAGGAGTGAGAATGTATTT.    | 9080 | A_95_P180092 TA12657_4097 |
| 9516 | 112 | 81 | 546  | TGGGGATGATCCGATAGTTTTATTGATATGGTGTGCGATTTCTATTGATTGGTGATA/   | 9082 | A_95_P211247 TA19569_4097 |
| 9518 | 112 | 83 | 434  | ACTGACAAAAGGATCAAAGTTGAGGCTACTTCCACTGCATTCAGGAGTGAATTAGA     | 9085 | A_95_P071205 BP525645     |
| 9520 | 112 | 85 | 316  | CACTGAAACTAGTCGACGGTGGGGAATCACAGAGAACTTTTATATATATCAAGGATG    | 9089 | A_95_P150822 DW000398     |
| 9523 | 113 | 3  | 566  | GTCAAATATTCAGTTCAAACCTTACCTCAACTGGCAAGGAAATTACCTAACAGTTTA.   | 9094 | A_95_P301238 FG636454     |
| 9529 | 113 | 9  | 1179 | CATTTATATACATCATCTGACCCATAGGAGAACATACTTTGCCAGCAAGGCAGCCACC   | 9105 | A_95_P159407 TA15129_4097 |
| 9531 | 113 | 11 | 846  | ATCTGTAATCCAGTGAATTATTTGTTGTTGTTGTTGTTAAGTCTGTAATCCAGTTGGT(  | 9109 | A_95_P020376 DW003318     |
| 9533 | 113 | 13 | 530  | CTGTCAATTTTGTGAGGGTACTTAATGTTTATGTTTATCAAAGCATCAGAGGTGTTA(   | 9113 | A_95_P283683 TC59158      |
| 9536 | 113 | 16 | 1240 | ATGCATTACCATCAGAACATTTTTTCTATAAATCTACCAGGCGCTCCCCTTTTCAAAA   | 9119 | A_95_P238329 AY029749     |
| 9538 | 113 | 18 | 600  | AATAGCAAGAAACCGGTATAATACTTCGGTGGGGTCTAAGGCGAAGGTGGTCACAA     | 9123 | A_95_P063880 BP135897     |
| 9541 | 113 | 21 | 542  | GTAGCTGTTTTAGCCCTTTTTCTCTTACTATCAGGACAATTATTAAGTTTTGGTTACT(  | 9129 | A_95_P223337 FS387202     |
| 9547 | 113 | 27 | 849  | TTCTCTGGCAGGTTCTCTATTATCTCATAGTAGATGTCCTACGCCGACAGAGATTTCT(  | 9141 | A_95_P199557 DW000180     |
| 9549 | 113 | 29 | 922  | CTTGGAACATAAAGAACATATCTTAAACTATCTTGCCTTCCATTAGTTATATGTGTCTC  | 9145 | A_95_P218387 TA21163_4097 |
| 9552 | 113 | 32 | 79   | TAGTGATGAAGAGATGCTAGAATGGGGGCTATCCCTGAGATGATAGCAGACCAAA      | 9151 | A_95_P101443 CN498832     |
| 9553 | 113 | 33 | 557  | ATAGCTGATTCACTCTCTCCATATAAGCTTATAGTAAACTCCATATCAACTGTACTGC   | 9153 | A_95_P047556 BP131686     |
| 9554 | 113 | 34 | 764  | CAGGAAGTTAGCAGTTGAGGATACAGCATTTTGAATATGAATGTATCTCGTAAGAT     | 9155 | A_95_P179392 AY074787     |
| 9555 | 113 | 35 | 805  | GTGGAAGTTGTGGAACAAATGGCAATGCAGATGAGTTCTGGATTGGCTGTGATATT     | 9157 | A_95_P205277 DW004725     |

|      |     |    |      |                                                             |      |                           |
|------|-----|----|------|-------------------------------------------------------------|------|---------------------------|
| 9557 | 113 | 37 | 513  | ATGGTGAAGTATGTATGGGGTTTCGTTGTGCTTTGCTTGAAATGTAGTGAATATTTCT  | 9161 | A_95_P001101 FS405424     |
| 9558 | 113 | 38 | 813  | AAATTCAGAAAAGGATGTTTCAAATCCGACAGATTTGCTCGTGCCGTGCCTCCAGG    | 9163 | A_95_P213982 EB679271     |
| 9559 | 113 | 39 | 609  | TTGTTACCGTGATGTTACCTTTGTGGATCTGTATTTACGAAGTTATCTGGAATTAAGT  | 9165 | A_95_P000421 FG167411     |
| 9561 | 113 | 41 | 742  | AGAAAACCGAGCTAATATAGTTGAGCTATCTTAGGCTAATTGGAGCTGTTATTTGTG   | 9169 | A_95_P270186 FG640788     |
| 9562 | 113 | 42 | 444  | GCCGGAAGACGTCTACTTTAAATAACTTCTGTCTTGAGACAGGTTTGCTTATATCTTA  | 9171 | A_95_P131452 EB431745     |
| 9564 | 113 | 44 | 389  | GGAAAAAGTGAAAAAAGGAAACGTAAGAAACTCCGCAAACCTGGTGCAGCT         | 9175 | A_95_P086708 FG644997     |
| 9567 | 113 | 47 | 677  | ATCAGAGAAATACGGTCAGGATGCCACAAATGTGGTGATGAGGGTGGTTTGCTCTA    | 9181 | A_95_P159157 EH617116     |
| 9568 | 113 | 48 | 793  | GCTTCGAAGATTTTGCCAGTGATTGAATGAACATTCAGATGGTACTATTTTGTCTTGA  | 9183 | A_95_P219382 DW001838     |
| 9569 | 113 | 49 | 841  | GGAGGAATCCTAAAATTAGGTAGGAATAAGGATTTCTTCTTGATTCTGAACTCTA     | 9185 | A_95_P220387 TA21596_4097 |
| 9577 | 113 | 57 | 677  | GATTCCAGTAAATTGTTGGAAGATTTGCAACAAAATCGCGATCAAAGTGGTGGAA     | 9201 | A_95_P315628 FG184961     |
| 9579 | 113 | 59 | 721  | TTTCTGCTCCGTTGTCGATAAAGGTCCTAGTCAACTTCCCATTTAGATAATTTTTGAA  | 9205 | A_95_P136297 EB439998     |
| 9584 | 113 | 64 | 908  | TGATATATACGTCGATATTTTGGCTTTCATGCATCACGGTCGATGTATATCGTA      | 9215 | A_95_P247162 EB447545     |
| 9585 | 113 | 65 | 1693 | TTTTGCTTTTGGTTTATCCTTGTTATTTTCGAGGAATCACAGAGTAACATGTTTGCCTT | 9217 | A_95_P016036 AY639865     |
| 9588 | 113 | 68 | 758  | TTGTAAGTGTTCATATGTAGCATCTTTGCTGTTGCATTCTCAGATTCGCGAAGAA     | 9223 | A_95_P146558 TA12573_4097 |
| 9589 | 113 | 69 | 455  | GTAACAGAATAGGAACTAGAATTTTGGCAGTTGTGATGGAATGGGAACAGTAT       | 9225 | A_95_P025761 EB643491     |
| 9591 | 113 | 71 | 687  | TAAATACACACAGCTTCAAGTGCAGTATTTTCATCAGACTTCATCACCATCTTCAAGT  | 9229 | A_95_P256194 FG197449     |
| 9592 | 113 | 72 | 787  | ATTTCTTCTTTGGTGAATGCGTCTGCAACGACTACTACCATTTTAGCTTTGCGCCT    | 9231 | A_95_P214832 EB441356     |
| 9593 | 113 | 73 | 771  | TCTAAATTCATGGAACCTGTTGTTATGCACTTTTTACCAGAAGGAAGTCACTTGAC    | 9233 | A_95_P236029 EB439796     |
| 9599 | 113 | 79 | 867  | AGAATGAAGGCAGATAAACTGTTCAAGACCCTATTTTGGGATCTCGTCTTCAGCGG    | 9245 | A_95_P251157 EB438096     |
| 9600 | 113 | 80 | 737  | CAGTCGGCAATCCCTCACCAAGAATAATGGGAAATATTTCTGATGTTGGAAGGAA     | 9247 | A_95_P164697 EH623971     |
| 9603 | 113 | 83 | 446  | ATATTACCATGCAGATATGAAAAGCGTACTTGAACAGCTTGCTCCACACCTTCTCACT  | 9253 | A_95_P069695 BP137459     |
| 9604 | 113 | 84 | 287  | AGATAAGAGCATCACAAGATCAGATTCATATTTTAAAGGAGCTGTTCAATCAATGTGG  | 9255 | A_95_P160297 EH618990     |
| 9607 | 114 | 2  | 222  | TCGATCACTGTATGAGTTTTGCCGGAGGCTTGGTTCAATGAAAAATCGTTGTTTCAGT  | 9093 | A_95_P091808 BP531503     |
| 9608 | 114 | 3  | 688  | ATCATTACTGTCTTTTTGTGGATGTCAGTATGAGTCAACCGAGGCGCTGCTATCTAA   | 9095 | A_95_P149572 EB679470     |
| 9612 | 114 | 7  | 874  | TTACTAATTAGTAATTACTGGCTGACCAGCTTCTCCTGCTGCACCTGGTTCTAGTTAGC | 9103 | A_95_P245267 EB679204     |
| 9620 | 114 | 15 | 756  | ATTTTCTGGCGGAGGCACTCACTTCACTATGGAGCTGATAGTACATTTGCTTCAAT    | 9118 | A_95_P164437 EH623678     |
| 9624 | 114 | 19 | 535  | GAACCTGGATTTTGCTTTTAAATCTTGCTTGAGGCAGACATTGGAAATTATAATGAC   | 9126 | A_95_P226839 FG645200     |
| 9632 | 114 | 27 | 882  | TTGTGGATAGTTGTCTCAGTTAAGTGTGACCGTTTATCATTGTGATGAGTCCGTCCTT  | 9142 | A_95_P149997 EB680048     |
| 9633 | 114 | 28 | 1256 | ACATCCTACCTTGCTGGGTTGATCCTGCTTTTGAATAGTTTGTGCTATGTATCTAGGA  | 9144 | A_95_P306818 TC51772      |
| 9635 | 114 | 30 | 829  | ACTGTCAAGTGCAATCCGAATATGAAGACTTAATTCTGAGCGCTGGAAGTATTCTC    | 9148 | A_95_P127832 EB427394     |
| 9640 | 114 | 35 | 839  | ATTTGGGAGTCACCATTCAGGAGAAGTGAAGTACTGACTGGGACATACTCCACTAGTAT | 9158 | A_95_P311513 FG142986     |
| 9641 | 114 | 36 | 711  | CATGTCGATGCAACTCTGTTTTGAAGCCTTTATATCTTTGATTTGGTTTCTTTCCGAC  | 9160 | A_95_P200897 TA17308_4097 |
| 9642 | 114 | 37 | 813  | CCACATTTGTGAATAGTGCCAAACCCTTGACAGTTTAGTTTAGGGAAATTCATTTTTT  | 9162 | A_95_P194687 DV159906     |
| 9644 | 114 | 39 | 221  | AAGCCGTTGGCTATTTATAAAATAACCATTTAACCCCCCAACTTTGTTTAAACCCAAA  | 9166 | A_95_P104597 CV017089     |

|      |     |    |      |                                                              |      |                           |
|------|-----|----|------|--------------------------------------------------------------|------|---------------------------|
| 9647 | 114 | 42 | 980  | GCCTACTCAGGTTCTTTCTTATCTAGGACCAGTAATTTGTCAAATGTACAAAAAGAAT   | 9172 | A_95_P183362 TA13441_4097 |
| 9648 | 114 | 43 | 1359 | CGGGTTTGCAGTTAATTATCTTGTTTGATGCTTGTCTTGGTATGTCTTCTGTTAATTTG  | 9174 | A_95_P199367 TA16979_4097 |
| 9650 | 114 | 45 | 826  | AGATGATAAGAACAGAAAGTCAGCTGCCCGTCTAGAGAGCGAAACAGCTTATCAGT     | 9178 | A_95_P307953 FG169124     |
| 9653 | 114 | 48 | 335  | GTAGTGGTATTATCTTTGGACTTCCGCCTGTTTAACTACTGTTTTAGACCTTTATTAT   | 9184 | A_95_P242312 FS433138     |
| 9656 | 114 | 51 | 1885 | CATGGTGCTGTATAAGAAGTAAGTACTATTTTGAACATGAGGGACACAATTACCTTT    | 9190 | A_95_P012486 M61904       |
| 9658 | 114 | 53 | 396  | GGAAGTTTCAAGACCACCTTTACAGAATTTCTTTTGTCTGAGGAACTACAACAAGCATG  | 9194 | A_95_P038631 BP129321     |
| 9659 | 114 | 54 | 314  | CACAAACAGAATTGCCAGTCTGTGTTGGCCTTGAGGTTTTGGTGGATAAAAGACCCA    | 9196 | A_95_P126762 DV998762     |
| 9660 | 114 | 55 | 863  | GGATGTCATGAGATTGTTTGAGATATCCACGACCTCAGTGTCCAAGTGTACAACAA     | 9198 | A_95_P268076 DV999490     |
| 9666 | 114 | 61 | 160  | CTTAATGTAGTTCTCCTTCTATCTGTATATGGTGTGCGATAAAAGTATGATTGAGTGGA  | 9210 | A_95_P112752 CV020816     |
| 9668 | 114 | 63 | 678  | TGCTGAGAAGTTGTCCTTAAAAATGGCAAGCAAATGCTATTAGATTCTGGACATGA     | 9214 | A_95_P294993 FG197328     |
| 9669 | 114 | 64 | 1086 | AAGGGAAAGTTATTTAAGGAGAGATCCATGTGATTAATTGACTAGACATTTGGTCC     | 9216 | A_95_P008077 TA13785_4097 |
| 9672 | 114 | 67 | 864  | GGTTATAGAACCCTTGTGAAAACAGCCCGTTTACATCCATCCTAGCAGTGCACCTT     | 9222 | A_95_P231229 DV162553     |
| 9678 | 114 | 73 | 375  | TTGTAAGAAGTATAGCAGACTCAGATCCTCTTCTAGTGGAAACGATCGGTTATTTCT    | 9234 | A_95_P133367 EB434818     |
| 9680 | 114 | 75 | 665  | TTATGAGAGGGTACAGTTCTTTGATTGTTTGTAGTCATTATCAATGGAGCTTCCGGTTAT | 9238 | A_95_P266781 FG635845     |
| 9682 | 114 | 77 | 454  | TGAAGATTGAAGAACATTGCATCAATGATTTGGTCAATGCAGACAATAGTTGAACGG    | 9242 | A_95_P150202 EH624123     |
| 9688 | 114 | 83 | 1418 | GCCCCCTTAACTATACACAGTAAAGATTGAGTCTTTTTTCCAGTTCCTGTTTCTTTCT   | 9254 | A_95_P220382 TA21595_4097 |
| 9692 | 115 | 2  | 713  | AGTGAATTTGTTTTGTTTTGTTCCGTTCCGTTCCAGTTCATGGGTTCTCAAACCTGTCT  | 9261 | A_95_P140362 EB444295     |
| 9702 | 115 | 12 | 3115 | GAACAGTATGAAGGATTAGAATTTGAGGCATCACATCATGCAGCTTCATTTTCTGAA    | 9281 | A_95_P024661 AB071435     |
| 9708 | 115 | 18 | 1380 | GCCTTTAGGATTTTAGTTGAACTTCAATTGTTGCCGGAGCTTAAAAACGCATATTATTT  | 9292 | A_95_P021151 TA12420_4097 |
| 9711 | 115 | 21 | 688  | TGTTATGCCCGAACATTGGCGGCCACATATGAAAAACTTGGCGGTGAAGTAAAATC     | 9298 | A_95_P293968 EB438959     |
| 9716 | 115 | 26 | 437  | AAGTTCAAATTTGAAGGAGATAAAAAATTGGGTCTGAGCCTGCTGCTTTGACTGCAGA   | 9308 | A_95_P083575 BP528793     |
| 9717 | 115 | 27 | 1373 | TATAGGCTGCTCTCAACCACTTTTTGTTATCTTCATGTATATAGCTCGTAGAGCATCGA  | 9310 | A_95_P201642 TA17468_4097 |
| 9718 | 115 | 28 | 1018 | GTTGTATCACCATTATTTAAATTGGTGCATGCAATTATGTAAATTGCCTCCCTTTTCTC  | 9312 | A_95_P020271 TA18887_4097 |
| 9722 | 115 | 32 | 268  | AAATTTTAGTACTTGGATCCGCGTCTCGTCTGCCCTTCTCTTTTCACTTGGACTAA     | 9320 | A_95_P033814 TA17615_4097 |
| 9727 | 115 | 37 | 625  | TAGCAGCGATTGTCACTCAATTATCCTGTAGTGTATTATCAGGCACAATATGTACTTT   | 9330 | A_95_P216712 TA20764_4097 |
| 9729 | 115 | 39 | 246  | CATACATCACACATGTTTACATTTTATTGTTAGTAACAGTGTGCTTGATGTTGTGT     | 9334 | A_95_P098553 BP534544     |
| 9730 | 115 | 40 | 615  | GATCCAACCTGCAGACCAGCAGTTGAAACAATATATTTCTTGTGTTTTGTTCAAATATGC | 9336 | A_95_P283673 TC51838      |
| 9732 | 115 | 42 | 1439 | CTTCTGTTTGATGATTGTTGACGGTGAACCACCAGTTATAATTATCACCTTGAATTC    | 9340 | A_95_P000326 AB032546     |
| 9736 | 115 | 46 | 1351 | CTCCTTAGTGTACCCTAAAACCTGTCCATTCTCAATGAAAAAGCATTAAATTTTCCAT   | 9348 | A_95_P019141 TC54601      |
| 9738 | 115 | 48 | 493  | AGGGCCTAGTGCTACTTTGTGTTGTATCATTTCAACTTTTACTCGTATCTTGATATATG  | 9352 | A_95_P025356 EB682879     |
| 9744 | 115 | 54 | 748  | CCATTGATCCTTTCGCAATGTATCGACCGACCTGTTAATATGATAAAAAGTCCAATTT   | 9364 | A_95_P129622 EB429592     |
| 9745 | 115 | 55 | 955  | CTGGTGCTAGCATCAAGAGAAAGATTATCCACATATTTTCACTATACAAAATCACAT    | 9366 | A_95_P200692 TA17261_4097 |
| 9747 | 115 | 57 | 32   | CAGTTCAAAGCTAAGGACGTGAGACTGCGCCTCAATAATATATTATTGTAATAATGT    | 9370 | A_95_P128187 EB427716     |
| 9750 | 115 | 60 | 213  | CGGATCATGAATTTTCTAGTCTTACCAGACTTTTATCGTCTTTTTGAATCTTTTGGAGG  | 9376 | A_95_P132152 EB432603     |

|      |     |    |      |                                                             |      |                           |
|------|-----|----|------|-------------------------------------------------------------|------|---------------------------|
| 9753 | 115 | 63 | 1275 | GACCCGAATATCTGAGCTGCAGATTGTTTTCTTGTTATATTTGCAATTGGCTGGATA'  | 9382 | A_95_P016461 TA15106_4097 |
| 9759 | 115 | 69 | 273  | AATTACTGAAATTGTTTTGGTAGCCGGTGTGACACCTTTCGTGGTTGCGGGAATCGA/  | 9394 | A_95_P150632 EB680765     |
| 9761 | 115 | 71 | 1118 | TGGAATTGTAAGTCCATTGCTCTACATTGCCATGAACTTATGATTCAACCTTACTCC   | 9398 | A_95_P195967 TA16235_4097 |
| 9764 | 115 | 74 | 870  | GACTTTGTTAATCATTATCAGCTTTCCTTCACTGGTTCCGCTTCTCTTGAAAGTTGTG' | 9404 | A_95_P008756 DV158570     |
| 9766 | 115 | 76 | 788  | ATGGATTTGTAATGGTTAAGCTTCATCTTTGTATACATTTGGCTCTAACATGCGGATG. | 9408 | A_95_P019366 EB677167     |
| 9773 | 115 | 83 | 728  | GGAGAGATAAGAGTGTTTTCCATTCATTAGAAAATTTAGCATGGGATGTAGCATT/    | 9422 | A_95_P014381 TA11720_4097 |
| 9776 | 116 | 1  | 748  | GGGCTCTGACTTCAGCAATAAGCTGAAATAATCTTGATTCTTCCAATTAACCTTAC/   | 9260 | A_95_P267311 DV159761     |
| 9777 | 116 | 2  | 829  | CTTATGCTACCAATCAACGAATGTATGTGTGCTGTAGCACCTGATATGCTCGCATCTA  | 9262 | A_95_P227434 EB425341     |
| 9778 | 116 | 3  | 712  | GGGTTGTGTTGGGTCAATTTCTGCGAATTATGATATTAACCTGCTTAAACCTGGTTTA' | 9264 | A_95_P193087 EB678134     |
| 9779 | 116 | 4  | 854  | GGTGCTTAATGCACCATTGATTTAATAGCTACTGTGTGTAACAAGAACTATGTTATA   | 9266 | A_95_P213812 TA20128_4097 |
| 9782 | 116 | 7  | 784  | GTGAACCTAAGGCTCCTCTGCGGGATTTAGATGCTTGCTGCTGTAATAGATTTT      | 9272 | A_95_P187792 TA14426_4097 |
| 9783 | 116 | 8  | 794  | TAGGCAAGCATCTTTCAGTCGTTTTAGAGGTGGTTTCTCTTATCATGTACAAAAAG    | 9274 | A_95_P126342 EB425683     |
| 9785 | 116 | 10 | 551  | CTTTATTTTCTGGCGACCTAACCCAGAAAGCTTTAAATTCAGCGGCCCTGACTGCTT   | 9278 | A_95_P257109 EH621959     |
| 9788 | 116 | 13 | 712  | TCTCATGCTGCACGGACAACCTCACATGCTAATAATATCAATCCGCCATGTGTTGTCA/ | 9284 | A_95_P314983 FG199812     |
| 9792 | 116 | 17 | 337  | AAGTTGGTGGTGAAGCAATACCAGGTCTGGCGCCTCATTACAAATTTTCTCTAATTCC  | 9291 | A_95_P103777 FG143827     |
| 9796 | 116 | 21 | 574  | TAGCCTGTTTCAAAAGATAATGAGGTTGGCTATGTTGGAGCTTGCTTTGACTGATAT/  | 9299 | A_95_P018491 EB678172     |
| 9801 | 116 | 26 | 453  | GTAGTAGTTGTTGTTGTTGTCGTCGTCGTTGTACAAAAGCCAATTTGGTGAACAG/    | 9309 | A_95_P139922 EB443834     |
| 9803 | 116 | 28 | 157  | AGATGTTCTTGCATCACATGACAAGCCATTCCTTTCATCATCGGCTTATGTGGTGGGG  | 9313 | A_95_P102357 CV015990     |
| 9806 | 116 | 31 | 819  | TATATAGTTTTCTTTGACCCCGCAGCTGAGCTCTCAAAAATCTGCAATATCTGCAGAT( | 9319 | A_95_P014416 EB449539     |
| 9808 | 116 | 33 | 1202 | GCTCGGTAGTTTGTGCCTGTTTATCTTCTTTCTTATTACTAAGATATATGACAAAGGAT | 9323 | A_95_P123292 TA13567_4097 |
| 9810 | 116 | 35 | 491  | CTAGACTAGCCAAAATTGCTTTTACAATGGGCAATGAATTTGATTACAGAGACTTG/   | 9327 | A_95_P019791 TA14991_4097 |
| 9814 | 116 | 39 | 1685 | CATTTTTGGTTGTGGAAGTGAAGAGAGCAAGTGGTGATACATTGGAGTACAACCAG'   | 9335 | A_95_P134317 TA13774_4097 |
| 9815 | 116 | 40 | 631  | GACATTACACCCAAGTTTGAGGAACGTGATTCATTTGTTGTGATGTAGACTGCAAA/   | 9337 | A_95_P203427 TA17851_4097 |
| 9818 | 116 | 43 | 508  | TTCCCCCTCTAAAGCTAGAGTTTGAAAAGATAAAGGATGTATTTGAAGGTCATTGA1   | 9343 | A_95_P044046 BP130776     |
| 9819 | 116 | 44 | 827  | GAATCTTTGTTTAGCTGCAGCAACCCTCTTCAAACATAAAGGTGCAGGTGGTTGGAT(  | 9345 | A_95_P266971 DV157633     |
| 9821 | 116 | 46 | 457  | GACTTCACGGTGTAGCTTGGAAAGCTGCAAACTCTTTTACAGTAGTCAAATACTGTC   | 9349 | A_95_P133377 EB434825     |
| 9822 | 116 | 47 | 635  | AAGCTGAAAAAATTGTCCAGATTAACGAGCTGAGGGTGATGCTGAGGCTAAGTAC     | 9351 | A_95_P135162 EB677602     |
| 9823 | 116 | 48 | 752  | CTCTCTTTCCATGCATTCCCTTCTGTCAATCTGTATAAATTTGACTCAGATCAGAG/   | 9353 | A_95_P246882 FG150796     |
| 9825 | 116 | 50 | 200  | AGAATGACGAACAAACTGTAGGTGCGAGAATATTGCTTCTAAAACATAAAGTTTCCC   | 9357 | A_95_P217512 TA20950_4097 |
| 9827 | 116 | 52 | 688  | AAGTCAGAACAACAGTGGTTGTGATTGGCAATGTACTGTACCATTCTCTCCTCCCTAT  | 9361 | A_95_P284268 FG151259     |
| 9829 | 116 | 54 | 672  | TGTTGTTGGTGAAGAGATGGTGTCAACAGTTGGGCTTGAATTTGGGCTCTACAG/     | 9365 | A_95_P303428 FG151438     |
| 9832 | 116 | 57 | 609  | AACCGCTCTTCAAATTCACAGCTGCACATTTCTGATCATTTTTACTTCTATGTTAATC  | 9371 | A_95_P262576 EB445150     |
| 9833 | 116 | 58 | 487  | TTTGAGTGTTATTGTAAGTAAACGTTTTGTTTTTGAAGAAGAAATCTCCATTCCGC    | 9373 | A_95_P159462 EH617704     |
| 9846 | 116 | 71 | 285  | GGCGTGTACAATATTACTCAACTGAATATTTTAGTACAGGCGTACGTTGTCATGCT    | 9399 | A_95_P097758 TA20565_4097 |



|      |     |    |      |                                                                |      |                           |
|------|-----|----|------|----------------------------------------------------------------|------|---------------------------|
| 9849 | 116 | 74 | 469  | CAAACCTTACGAAAGCCTCTTGGTTTCGATAAATAAGCTCCATGTGACAGGTTTTCTAT    | 9405 | A_95_P187732 TA14411_4097 |
| 9850 | 116 | 75 | 665  | ATCATCTTTTTGAGCTTTTGGGCCGAAGTGCCTACAATTCAATCTATCCGCAAGGAG      | 9407 | A_95_P298978 FG645447     |
| 9851 | 116 | 76 | 809  | AAGAGCTAGCCAGATCTATGGACAAGGACATTGAGATGAGCTATAAATAAGTATTTT      | 9409 | A_95_P254944 EB449161     |
| 9853 | 116 | 78 | 816  | AAATATCAAAGCTCCGAGCTATTAAGAGGGAATCAACGTCCTACTACGAGCCGCAC       | 9413 | A_95_P266456 DW003912     |
| 9856 | 116 | 81 | 862  | GCACAATATCTTTAGCTGCTTCTAGTTTTGGGATTCCTACTATAATGGTGGAAATTTCTTG/ | 9419 | A_95_P211612 DV159929     |
| 9858 | 116 | 83 | 575  | CGATTGCTTCGAAATTATCTTTCTAATCTATGATGATGAACTGAGGATTTCTTGCTGAC    | 9423 | A_95_P184402 FG634402     |
| 9860 | 116 | 85 | 895  | CTCTCGAGGATGGGAATAACAAGCATATTTGGGGCTATATATTTTTAGTTTGCCGAGC     | 9427 | A_95_P017901 TC44187      |
| 9866 | 117 | 6  | 631  | TTTCAATGGCACTGCACTAGGCATTTTAACTTTTATATACATGGATGATGCTGCTTTCC    | 9438 | A_95_P207202 EB679579     |
| 9868 | 117 | 8  | 558  | GACGGGATAGATGGTAATTCTCAGTTAGTTGAATTTCTGAATAGGGAAATATTTTGC      | 9442 | A_95_P297468 EB683673     |
| 9869 | 117 | 9  | 855  | ACCAAAGGGCTTTTGTCTTTGGTACTGACTATTTGTTGTTTATTGGCATCTGGTTTTT     | 9444 | A_95_P271446 EB449461     |
| 9870 | 117 | 10 | 762  | ATGTACTTATGCTGCTGTGCTAAACTGTGGTATCAGGAGATTTGGCTCTATGAGCACI     | 9446 | A_95_P265241 FG151976     |
| 9874 | 117 | 14 | 719  | CTGGATAGACTATGATGATGCTATATCAATCTCTGTCAACGAGGAAGTAACATTGATC     | 9454 | A_95_P138997 EB442705     |
| 9878 | 117 | 18 | 694  | AGAATGTTTGGAAAGCTCAGGCGCAAGATTAATTGCTTATCCTCATCCTAGCCCTTACC    | 9462 | A_95_P292723 EB428286     |
| 9879 | 117 | 19 | 704  | GTTGAACACGTTTCAGAAATTTGCATCTAATGTTTAGTTCAACTGTTTGGCATTTCGATC   | 9464 | A_95_P177262 TA11928_4097 |
| 9885 | 117 | 25 | 1587 | GTGCATTAGGGAAGCAGCTGTACTGTTACTTATATGTTTCATTGTTTCTGCTGACAATT    | 9476 | A_95_P179012 TA12404_4097 |
| 9890 | 117 | 30 | 810  | AAGAGTTGATGGGCAGAAACGAACAAAACCTATTCAGAAGCTGCAGCAACACAACCTI     | 9485 | A_95_P297033 EB680939     |
| 9897 | 117 | 37 | 605  | CACATGCAACTTATGCTTCACTTGATGGAGTCCCTTTATTGCCAGCACCATTTTTGCTCA   | 9499 | A_95_P305863 FG201356     |
| 9898 | 117 | 38 | 1349 | GATGATAAGAGTCAGACCTGTTTTGTGATTCTTTAAATGTTTCTTTGAATTGGAGAGC     | 9501 | A_95_P012086 AJ438614     |
| 9899 | 117 | 39 | 611  | CTTGATCTTGTGACCTTGTAGCTTTATCCGGGAGCCACACAATTGGAAACTCGAGAT      | 9503 | A_95_P139372 FG146483     |
| 9900 | 117 | 40 | 3868 | GAATCTCTAAAAGTCTTGAAGATTTCTACAAATGAGAATCCCGCAGATATGCTGACC/     | 9505 | A_95_P007056 TC55284      |
| 9902 | 117 | 42 | 739  | GTTGTTAGTGGCCTAAATGTTGTCCATTATTTCTGTACATTATGGAAGAGTTGTCTTI     | 9509 | A_95_P015666 TA16785_4097 |
| 9906 | 117 | 46 | 802  | TGAAATGGAACATATTTCAATTGCTTCTCTTCCGGGGATGTACGAACGAACTGTGACC     | 9516 | A_95_P019921 EB427335     |
| 9914 | 117 | 54 | 721  | ATCTGATGTGGAAAAGGTGGACTCTCTGTAAACCCAAAGATGGGGTGATGCTTTGCT      | 9532 | A_95_P201727 TA17485_4097 |
| 9915 | 117 | 55 | 407  | GAACTTTGTGTATCTAGGGCGAATTTCCCCCTTTCAATTTTTGATTCTGTTATTTGT      | 9534 | A_95_P095838 BP533362     |
| 9916 | 117 | 56 | 461  | ATGATACTTTGGGCCCATCTTGTTTTCAATTAATAGAGGTCTGAATCAATGTTTCAG/     | 9536 | A_95_P121402 DW001464     |
| 9919 | 117 | 59 | 764  | AGCTTCAGGAAGTATATGTCTTTGTGGTTACTGAACTGATGATGAAATGTTTTGTTTC     | 9542 | A_95_P011811 EB681685     |
| 9920 | 117 | 60 | 1054 | AAATGTTTGAATGCAACTGCGCGGGATTATATTTACATTTCTGTGCTGAATTTACAGTG    | 9544 | A_95_P024761 TA14159_4097 |
| 9921 | 117 | 61 | 340  | GGGTTACAAATGTTGAAACAACCTATTACATACTTGGATCTGTTGCAGGACCACATCC     | 9546 | A_95_P070170 BP192543     |
| 9922 | 117 | 62 | 609  | GAGGAACTCGCATGGAGGAATGAACAATTCCTTCTATATTCTATATTCTCAAACCT       | 9548 | A_95_P089513 EB677527     |
| 9925 | 117 | 65 | 753  | GAATAGTGTTACTCATTTTCTAGAATTGGTTTCTTGGTACTGAATGAGCCACAATTTG     | 9554 | A_95_P031501 TC46025      |
| 9926 | 117 | 66 | 824  | CCTGAGGTACAATTTACTGTCCAATGTAACCTTGGATAACTGATCAATACATCCTTTA/    | 9556 | A_95_P296533 EB677605     |
| 9927 | 117 | 67 | 470  | CTCAAGTGTACGATTTACCTGTGTTTTGAAACTTTCTGAATGTTTCTGCTAATAAAC      | 9558 | A_95_P005466 TA12358_4097 |
| 9929 | 117 | 69 | 0    | AATGCCAGTATTGGAGGGTGTATTAATCTACTGATCCTACAGAAGTGAAAGATTCT       | 9562 | A_95_P031051 A_95_P031051 |
| 9930 | 117 | 70 | 893  | GCGCATGCGTTTTTTCCCCCTGCTTTAGATGTAGATATTATTTTGGCGTTTTTCTATTI    | 9564 | A_95_P217457 TA20936_4097 |

|       |     |    |      |                                                                  |      |                           |
|-------|-----|----|------|------------------------------------------------------------------|------|---------------------------|
| 9933  | 117 | 73 | 1020 | GTACTTAACCAAGTAATTTAGAGGGGTCCTTCGGTAGAATGTAATAATGTGAATATG        | 9570 | A_95_P028551 TA12679_4097 |
| 9937  | 117 | 77 | 637  | AATCGGTGCACGTGGTTGTAATCTTCATTTAAACAATGAACTTTTAGTTCCAGTTCAGCACCA/ | 9578 | A_95_P122422 DW002400     |
| 9939  | 117 | 79 | 549  | TTAGGGCCATAATTGTATGGATATTGCATCTCTCCATCTCTTTCTTTGGTGTGCGACA       | 9582 | A_95_P236774 TA18727_4097 |
| 9954  | 118 | 9  | 876  | AGAGACAGAACAAGGTTACTATGGTACAATGGTACAGATGTGGAAGTCTGCGCATG         | 9445 | A_95_P219057 EB449531     |
| 9955  | 118 | 10 | 308  | GTGAACAGTCCGAAACACGAAAATTCGGTGAATATGAGGGTAGAGATGAACTGTGT         | 9447 | A_95_P026221 DW000146     |
| 9958  | 118 | 13 | 583  | TGGTATCACGACTTAACCATTGTAACACTAGACTTCCGGTACTTAATGTTATTGAAAC       | 9453 | A_95_P203097 TA17781_4097 |
| 9960  | 118 | 15 | 564  | AATAGATGAAGAGCGTTATCATGATGCTTCAAGATTGTGCCAAAAGTACGGGAAGT         | 9457 | A_95_P156767 FG160166     |
| 9962  | 118 | 17 | 579  | TGCGTCTCCAACCTTATGATCTTCTCAGCAGTGTATGTATGTGAAAGTGTCACTCTTA       | 9461 | A_95_P219117 FG645464     |
| 9966  | 118 | 21 | 399  | TACTAACCTTTGTGCTATCCATGCTAAGAGAGTGACCATTATGCCGAAAGACATTCAA       | 9469 | A_95_P107002 FG641470     |
| 9967  | 118 | 22 | 660  | CACGGTTTTTGGTGTGTTGAAACACTTGAGGAATTAGTAATGTTTTTCTATTATGCACT      | 9471 | A_95_P149922 EB679934     |
| 9974  | 118 | 29 | 861  | AGGGTTGGTGCTTCGTGGATCTCATTCTGAATGTTTAGCTTTATATTTTCATCTTACGTA     | 9484 | A_95_P199572 EB424673     |
| 9982  | 118 | 37 | 687  | TATACGGAGACCCGTTTTTTCACAAGAAGAATGAATCCCAGTTCAAAAGAAGGGGGC        | 9500 | A_95_P162492 EH621448     |
| 9985  | 118 | 40 | 216  | GGGATTAACATCTGATTAGATGTGGCTAATTTTGCTCATGGAACCTTTTTCTGTACG        | 9506 | A_95_P107547 EH621391     |
| 9986  | 118 | 41 | 876  | CAAATTGGCAATTGTTCAAATTTGGAGTTATGTACTATGAGCTGGTCTCATTGATTC        | 9508 | A_95_P189592 TA14820_4097 |
| 9991  | 118 | 46 | 444  | AACAGTAGTAATTTCTGTTGACCATCTTCTTAGTTGTAGATTGAGCTTTGTA AAAAGG      | 9517 | A_95_P142987 EB446380     |
| 9992  | 118 | 47 | 750  | CCATTGATAAAGTCACTGAAGCCCAGCCTCACAAACGGATCATTATGTGTAATATATAA      | 9519 | A_95_P104267 DV159758     |
| 9999  | 118 | 54 | 248  | CTAAGCTGAACCAATTAATCTTAATTATGCAAACATGGATGGGTGTTAGCCTTTCAT        | 9533 | A_95_P102617 CV016109     |
| 10000 | 118 | 55 | 617  | AATTGGAATGATATAAAGAAGATTAGCATACGCCCCCAATGCAAGGATAACGAGCA         | 9535 | A_95_P233044 EB436935     |
| 10001 | 118 | 56 | 352  | TTCAATTCGTA CTGTTTTCATCGCCCTTCGTGCGAGTGTATTGTGGAAGAGGAGTTT       | 9537 | A_95_P076785 EB681161     |
| 10003 | 118 | 58 | 1016 | GGCTTGTCATGGTTTGGATCTGGTTTGTAAATTATTATTGACAAATAGATCTTGCCAC       | 9541 | A_95_P017906 TA12822_4097 |
| 10006 | 118 | 61 | 846  | AACTTCTTACGTCCTGACATTTATTGGCTTTACGGAACACATTTTATACAATCCAACGA      | 9547 | A_95_P231204 DV999740     |
| 10011 | 118 | 66 | 753  | TTAATAAGTACTGGTTTCAGTCTCTCGTATGCCAAAAAGGAGAGATGGCCGACAGG         | 9557 | A_95_P292228 FG143890     |
| 10012 | 118 | 67 | 182  | GTAAGCTGGCTGCGCATATAGACTTCATCAACGCAGA ACTTGAGGTTGAATGAAAAA       | 9559 | A_95_P060855 BP135107     |
| 10013 | 118 | 68 | 96   | GTTGGAGTAAAAGCAGCTGAATGGCACA AAGTGCAAATAAGAATTATTTACTAGTT        | 9561 | A_95_P132887 EB433697     |
| 10017 | 118 | 72 | 458  | TCGAGTGCTGCTTTTAGTGAATGAGAAGCATCTTCTATTCATTTCTGGTGGCCAAAGA       | 9569 | A_95_P271331 AM843409     |
| 10018 | 118 | 73 | 687  | CTAAAGTTTGGTTGCTAATTTTGGATTTCCATCTCGTCTGTTGGCTGTTTCGTGTAAGA      | 9571 | A_95_P268806 DW003107     |
| 10020 | 118 | 75 | 760  | ATCCGAGAGACATGAGATCAGTATAAACTTCATCGCATAGAGCCATTTGCGTGACAT        | 9575 | A_95_P160162 EH618805     |
| 10022 | 118 | 77 | 648  | GGAGTGGGTGTGGGGGTTTATGTTCTACAATTAATATCATGTACTATTAGTAATGC         | 9579 | A_95_P201027 TA17337_4097 |
| 10028 | 118 | 83 | 920  | AATGTGAATCCAGAACCTCAGAATGTCCTTCTGAGCCTAAGAGCTCTAGCACAACG         | 9591 | A_95_P190922 TA15117_4097 |
| 10030 | 118 | 85 | 565  | TTGCTGATTCGCGACTTTTGCCTTTGCATTATTCTTCTTATAATATAGCTAATGACCTG      | 9595 | A_95_P222307 TA22005_4097 |
| 10033 | 119 | 3  | 845  | GATTGGGAGAATGTTTTGAAGTTTGGATTTGCACTGATGGTTAGAGTTTTGACAAT         | 9600 | A_95_P012906 TA12892_4097 |
| 10035 | 119 | 5  | 820  | ATGTTCAACTTTCTTTTCTAGTAAAAGTGAAGACGATGGCCTATATTATTTCCCGT         | 9604 | A_95_P185427 TA13910_4097 |
| 10041 | 119 | 11 | 1063 | TGGTGCAAACAGTATGATTTTCTGCTTTGACCTATCCAAAAGGTTAATTGATGGATT        | 9615 | A_95_P014621 TA16696_4097 |
| 10050 | 119 | 20 | 829  | CCGCTGCTGCGTGTTAGTGAAATTGAGAGAATCAATAGCTTCATCTGTTGATATTGCA       | 9632 | A_95_P289493 EB678011     |

|       |     |    |      |                                                                 |      |                           |
|-------|-----|----|------|-----------------------------------------------------------------|------|---------------------------|
| 10054 | 119 | 24 | 602  | AATCCCAGGGTCTTAATACGTTGATTCAATTATTTACTAGCATGGAGGTTTCATCA        | 9640 | A_95_P201002 FG644605     |
| 10058 | 119 | 28 | 867  | CCAGGATCTAGCCCTTGATCATTACTATGTTGTGCATCATCTTAAATTACTCATTAAC      | 9648 | A_95_P246352 EB678725     |
| 10059 | 119 | 29 | 831  | GTCTAAATGTCTACAGTATTTTGCTACATGACACGTTAGTCATGTCCCCTGATGCAGT      | 9650 | A_95_P015681 EB677928     |
| 10060 | 119 | 30 | 777  | ATATGTGGGCAGAGGCATATAAGTGATGGCATCATAGTCTCTGTTACAAACTCAGTA       | 9652 | A_95_P037936 TA12762_4097 |
| 10062 | 119 | 32 | 616  | AACTGCTGATTCTGGTGTGCTGCTGTTGTTGCCATTTGGTGGATTTCCAGCAATTAG       | 9656 | A_95_P056396 BP133943     |
| 10067 | 119 | 37 | 731  | CGTGAAGTTTTACTGCTGTAGGGTATTATCCAGGCTCATTTTGTATGACGTTTTAGC       | 9665 | A_95_P014756 TA11873_4097 |
| 10077 | 119 | 47 | 322  | TCTGTAGCATCCAAACTTGCCATGTATATCAGATTTTTAAGATGCTAAGCATCTTCTC      | 9685 | A_95_P114052 CV021418     |
| 10078 | 119 | 48 | 448  | ATGTGCCAAAAGAGGCTTCTGTGCAACGCACACTTTTTTCATCAATCTTCAGAAAATT      | 9687 | A_95_P136857 EB440570     |
| 10080 | 119 | 50 | 338  | TTGCCGATGAACGAAGACTAAAGACAAGACAGCTAATGGAAGAAGAGAGAATCCAT        | 9691 | A_95_P054011 BP133331     |
| 10082 | 119 | 52 | 833  | GTTAGCAAACTTAGACTAAGGTTCTCTACTTTTCTTTCAGCCTAGTATGTTAGTTGA       | 9695 | A_95_P228119 DW004819     |
| 10084 | 119 | 54 | 510  | TGCAATACTCTGCACTATGTTGCTCTAGTCACTACATCATTATGAAGCCATTCCGCC       | 9698 | A_95_P013141 TA14138_4097 |
| 10086 | 119 | 56 | 807  | AATCTTTTGGGATAGTCGAGGAGCGCCCTAGCTGGCCTGGACACTACTGTTATAAA        | 9702 | A_95_P021636 EB426600     |
| 10087 | 119 | 57 | 839  | AATGCAAGAAAAAGTCATAGCAATCAAAGTTCAGAAGACCCTCCATCATCCATTTTGC      | 9704 | A_95_P179902 TA12613_4097 |
| 10092 | 119 | 62 | 826  | GTCGTATCTCGAAACACGTGATATTTAGTGCTTAATGCATATGAATGTTTTTCTCGGT      | 9713 | A_95_P013721 TA15116_4097 |
| 10093 | 119 | 63 | 758  | GGGAACCTACCTTCTGTTCCACAAGCTGCAAACGATGCTTCTTTTATAATCATAAAA       | 9715 | A_95_P164192 EH623339     |
| 10094 | 119 | 64 | 478  | AGGCGTAATAGTAGTTGTTGTTGTTGGAAAACCTTGTATTGTGTTGGTTTGAGTG         | 9717 | A_95_P178192 TA12178_4097 |
| 10100 | 119 | 70 | 855  | AGAGGGGGAGAAAAATCTTGGTCCCATGATCGTCTAATTCATGTTTACCATTTACC        | 9729 | A_95_P229529 EB682588     |
| 10101 | 119 | 71 | 346  | TTGTTGAGAAGGCTAAAGAAGAAGGCTATGATGTGAGCAAGCTAAACAAGACTCAA        | 9731 | A_95_P156692 EH614617     |
| 10109 | 119 | 79 | 1690 | TGGAATTTGGAACCTGAGAACAGAAAACCTCGACTCATGGTTTCTAGGCCAAGAAAC       | 9746 | A_95_P186757 TA14194_4097 |
| 10110 | 119 | 80 | 790  | GGCAGCTTCAGTGTTGACGTTGATGCTGCTCCCTCTATTTTACCTTATTGTCTATTTGT     | 9748 | A_95_P209847 EB439165     |
| 10113 | 119 | 83 | 635  | GGTAGTCGTGACCGCTGTTGATTCTTTTTACTACTATCATTATTGTTGTTGAACATTAC     | 9754 | A_95_P207032 DV999819     |
| 10125 | 120 | 10 | 764  | TCTTGTTACCTTCAACCAATTAGCGGAAGGGTTTTGTGGTTGTTACTAATCAGCTG        | 9614 | A_95_P268476 DW001859     |
| 10132 | 120 | 17 | 705  | AAGGCCAAGTCGGAACAGCTGAATATCAGAAGCTTCTTGCTTCAAGGTTGAAGAGC/       | 9627 | A_95_P033399 AJ632711     |
| 10137 | 120 | 22 | 498  | TGAATTCAGACGAATTGAATTTCTGGGGTAGCCGTAAGTTTTGAAATGCTGAAGC         | 9637 | A_95_P264801 BP528807     |
| 10142 | 120 | 27 | 287  | AGCCACCCCTCATCCACTAAGCTAGTAAGTTATTGTTACTAGATTTTGTGGTTTTT        | 9647 | A_95_P134162 EB436085     |
| 10147 | 120 | 32 | 356  | TCAGTGTATCTATTTAATCTGTTTTGAGTGAGCCACTGATTCGTTTGACCTGTATCTT      | 9657 | A_95_P097258 BP533958     |
| 10149 | 120 | 34 | 655  | TTAATGATCTTCGAGTCGACAACCTCGCCGTAGTGAGCAAAAGCATCTCCTAAAGTTC      | 9661 | A_95_P189682 TA14840_4097 |
| 10152 | 120 | 37 | 838  | AACTCCATTTTGGTGGTTCCGTAAGTTCGACTGTCATTTGAAGTTTGAAGCAGTCGCTTGGTC | 9666 | A_95_P200292 EB426680     |
| 10157 | 120 | 42 | 1517 | CTTTTGATCAACCAGCTGATACTAATCTTGATTGAACTGTCATCTTTTGAGCTCTATT      | 9676 | A_95_P017566 TA15028_4097 |
| 10163 | 120 | 48 | 781  | CGTGAAGAAAATTGGATTTAGCTGTTGGCTGATTATTTTCAGAAAATTTGTAGTTGGA/     | 9688 | A_95_P013906 DV159892     |
| 10165 | 120 | 50 | 261  | GAGGTCGACTAAGCTGTTGGTGTGTTCTCTCTGTTTTATAGTAATTATCAGTTATT        | 9692 | A_95_P102592 CV016096     |
| 10167 | 120 | 52 | 748  | CCTCAGTAGTTTGTGTAAGATACTATATTTTTTCAGCCTTTTGCAGAAAACCCAT         | 9696 | A_95_P189322 FG171924     |
| 10168 | 120 | 53 | 488  | ATGATTAATTGGGCCGTGGTGTGAAAATGGTGGTGGTGTACCTTTGAAGGTTTT          | 9697 | A_95_P252949 FS409302     |
| 10170 | 120 | 55 | 881  | CGGTTTGGATACCGAAGTTGTTTTCACGAAAAGAGTTGATCGAACCGGTTCCGGTA        | 9701 | A_95_P283383 AM851016     |

|       |     |    |      |                                                             |      |                           |
|-------|-----|----|------|-------------------------------------------------------------|------|---------------------------|
| 10171 | 120 | 56 | 226  | ATCCAGCAATTCTCAGCAGAATGAGGAGAAGATGCTCAACACCTGTCTGATGCTAAA   | 9703 | A_95_P164772 FG148948     |
| 10173 | 120 | 58 | 816  | CAGGCCCATATGCTATTTAAGTTTGTAAATTTAGGAGATGTTCAAGTAAAGACCTGA1  | 9706 | A_95_P194912 EH615319     |
| 10174 | 120 | 59 | 159  | GGTGAACCGTGAGGAGAAGCTTTTGATCAAGCAGTTAGAGAGAAACAAACGAGAA/    | 9708 | A_95_P068655 BP137183     |
| 10176 | 120 | 61 | 187  | TGTGAAAATCTTGAGGATGCGAGCACATGAGCTAATTCTGACCGATGCAAGAGATA    | 9712 | A_95_P105642 DV999385     |
| 10178 | 120 | 63 | 514  | GTGTCTTCTGTATGATGCCTACCTGTTAACTTCAGTTAACATCGACTGGTTTAAAGT/  | 9716 | A_95_P188217 TA14521_4097 |
| 10183 | 120 | 68 | 730  | TTGTTCTTAAGTTGATGATTGGCTCTTCTGCCATGGTGGCCTTCTTCCTCATCATGTT  | 9726 | A_95_P150452 EB433813     |
| 10184 | 120 | 69 | 628  | CATCTCAAATTTGCCAAAGGCTAAAGATGAAGATACATCTAACCTTCTTGTCAAGCA   | 9728 | A_95_P189147 EB424654     |
| 10185 | 120 | 70 | 839  | TCAGCTCAATTGTTTGGATATTGCTCTTGAAGAGCTGATTAACCTGATCCTGGGCT    | 9730 | A_95_P236054 EB448164     |
| 10187 | 120 | 72 | 1202 | TTATATGCATCTTTGTGTGGAGGACTGGATGTGGTGGTGGAAAGCATTCTATGCATC.  | 9734 | A_95_P215722 TA20550_4097 |
| 10188 | 120 | 73 | 488  | GCCTATTTCCCAAATAAATTATAGCCCCTAGTCAATATACATATATTACTCCCTCCGT  | 9736 | A_95_P204047 EH622076     |
| 10193 | 120 | 78 | 478  | GATTGCTCACTGTTAAAGTTTAGACCAATGCAGCTCTACATCTGTAGATGAAAAAATT  | 9745 | A_95_P146842 EB450993     |
| 10199 | 120 | 84 | 504  | TGAAGTCTTACATATCTAATGAGCCACATTATGGTTGATGCTGGCCGTCTGCACTCTT  | 9757 | A_95_P050446 BP132397     |
| 10205 | 121 | 5  | 810  | TATAAAGATATCACACTCAAGGTGAATGGAAGTGCTTGAAGCAGGAGGTATTCGG     | 9767 | A_95_P195382 DV158230     |
| 10210 | 121 | 10 | 774  | CATTATCAGCATTCTGTGCTGTTGTTTCCAAGAATTAATGCTAAATCTTCTTTGAGC   | 9777 | A_95_P012746 DV160348     |
| 10212 | 121 | 12 | 321  | TATCGAGCCTAATAGTTTCTTCTACCATTGTTAATTGTAAGGATGTGCTGCTATTCA   | 9781 | A_95_P004571 EH621092     |
| 10215 | 121 | 15 | 802  | CCAGTTTTGTAACATAACTGTATTTCTTATAGAGACCCCTGGCTTTTCATGTCAAGAA/ | 9787 | A_95_P022686 TA17003_4097 |
| 10216 | 121 | 16 | 581  | TTATTAACATTAATGTATGGACATGGGGCTTATAAATGCGCGTCACTTCCATTTGCG   | 9789 | A_95_P015811 DW002308     |
| 10220 | 121 | 20 | 130  | CCGTATGTAATCTAGTGGGGTGTACTTGGGTTAGTTTTGCTTTTCATGAAAATT      | 9797 | A_95_P141872 EB445487     |
| 10222 | 121 | 22 | 1334 | GATGGAACCTGGAGCTTTGTGTTATTGTGCAAGCTTCTTACTCATTAGTTATTTCAT/  | 9801 | A_95_P013021 AB017694     |
| 10223 | 121 | 23 | 640  | TTACTGCTGGCATTGTCTTGTGCTGTGATCTAGATGTTCTTAATAATGTATGGAATT   | 9803 | A_95_P013556 EB431060     |
| 10225 | 121 | 25 | 710  | AGTTACCATGGGGAGTACTGCTGTATTACTTATCGGATGGAGGACACTCTTGTTCAG   | 9806 | A_95_P188572 DV999990     |
| 10226 | 121 | 26 | 506  | TTTGTGTCCATTGCGTTCTTGCAGAGTTTAAATATCCTTTCCTTCTAGTATAAACCA   | 9807 | A_95_P180242 TA12694_4097 |
| 10228 | 121 | 28 | 1004 | TTTACGTGTCCATTCAAGATGTCCAGTGTGCAATGTTAAACGTGAATGAATGCATAG1  | 9811 | A_95_P013651 TA15113_4097 |
| 10231 | 121 | 31 | 246  | CACGCGAAATGCACAAATGGCTGAAACAAAGCTAAAACAAAAACTCAAATGAAGAT    | 9816 | A_95_P096883 TA18314_4097 |
| 10235 | 121 | 35 | 1362 | GGAGGGATTTTTTCAGATTCATACCAGAAATATAGTGCTGCAAACAAATCGTGCTG    | 9824 | A_95_P195897 TA16218_4097 |
| 10249 | 121 | 49 | 1741 | GTGACTTGACCTTAGTCCCTTATGGAGCTTTCGTTTCAACCTTGTGCAAGCATATTGGA | 9850 | A_95_P193277 AJ344535     |
| 10252 | 121 | 52 | 1614 | GCCTTCTTAGTCCCAGCTTCATCATGTGTTTGGACTAAATTAATTTGTTTCATGTTCA  | 9856 | A_95_P193897 TA15770_4097 |
| 10254 | 121 | 54 | 586  | GGCCAAGTGTAGCACCTTGGGATATTAGTAGCTTGAGTTTTACTTTTTACAGTGT.    | 9860 | A_95_P222362 TA22017_4097 |
| 10255 | 121 | 55 | 469  | GTCTCTGATTCATAAGGTATTCTTATTGCGCGTGGAGCACTTTCCTTCTCCACTTCTT  | 9862 | A_95_P053336 BP133151     |
| 10269 | 121 | 69 | 619  | TCGTTTCAGCAGTATCAAATTAACCACTTCAGACTCTCCTTCAGCAATCAGCTTTGG   | 9890 | A_95_P218317 FG641433     |
| 10272 | 121 | 72 | 189  | AATATTCTTAGTAAAAGGCGAAAGAATAGTTCGCTTTGTGCCATCGCGTGGCTGC     | 9896 | A_95_P142227 EB445749     |
| 10274 | 121 | 74 | 562  | GTTGCAAGTTGGACTCTCCTCTTTTCAGAAGGGAAAGGAATTAATTAATGTATCAATGA | 9900 | A_95_P270526 EB432745     |
| 10275 | 121 | 75 | 84   | GAAATATAGCTCATTACCAATCCCTTTTTCTCTTGGCTGTTTCTATACAGTTAACCTT/ | 9902 | A_95_P106362 CV017874     |
| 10276 | 121 | 76 | 680  | GGGACAACATAATGTGTGATGGCTTTTGTGTAACTATGTGCTATATACACTTTGCTAT  | 9904 | A_95_P201982 EH624166     |

|       |     |    |      |                                                               |      |                           |
|-------|-----|----|------|---------------------------------------------------------------|------|---------------------------|
| 10280 | 121 | 80 | 659  | AACGGGTGTTACTAATATGGAAAATAAGGCGTTTACGCTTTAGCAAGCAGTGTTATC     | 9912 | A_95_P179602 TA12547_4097 |
| 10281 | 121 | 81 | 486  | GTTTCGCTGCAGTATCAGGTCCCTGCCTTGATTTCGAGTTTAAATTTTTGCTGCTCTATAC | 9914 | A_95_P096318 FG639219     |
| 10282 | 121 | 82 | 837  | CTGCAGACTTGCAAAAGATAATGCTTCCTTTTTTACATCAGTATATATGAAGTTTCTC    | 9916 | A_95_P258668 TA13753_4097 |
| 10285 | 121 | 85 | 1032 | AATGCTCTATACTTCATTTGTTTAAACAGCAGAGCCTGTTTTGCAGATGATGATGTTCC   | 9921 | A_95_P213967 TA20160_4097 |
| 10288 | 122 | 3  | 1149 | AGGATCCTATAACAAGAAGTTTAGGCAGTTTAGGGTCTCAGTGGTTTTCCCAATGGCTT   | 9764 | A_95_P213952 TA20157_4097 |
| 10289 | 122 | 4  | 858  | TGTTGCAGGGGTTCATACAATCATGCTTGGTTCATATACTGACTATGATGAGTACTCT    | 9766 | A_95_P118972 DV161905     |
| 10291 | 122 | 6  | 336  | CTATGAAGACTTGCATATTTAATAAGGGATTATGAGGTCATGATCCCCTATGTTTTT     | 9770 | A_95_P005131 CV018107     |
| 10294 | 122 | 9  | 373  | GCCTCGCCGCTCCTTGAAAACCTCATGTTGTATTGATTTTCTCTTCGTGCTACTTATTT   | 9776 | A_95_P097693 BP534162     |
| 10298 | 122 | 13 | 726  | GGTTTTGGATCGGGGTGAGAAGATTGAAGTCTAGTGGATAAAACTGAGAACCTTC       | 9784 | A_95_P296238 FG634419     |
| 10299 | 122 | 14 | 524  | GACACGAATTAGAAGAGAGTTGAGACAAGCTGCGAGACCAAGAATTATGTTGGGCA      | 9786 | A_95_P053236 BP133122     |
| 10306 | 122 | 21 | 680  | CGTCCTTGACATTTGTGTATGGACTGGGTATGAGAAATTCTATAGTATTTGTTTCGAT    | 9800 | A_95_P008406 TA13639_4097 |
| 10316 | 122 | 31 | 786  | CCTAAGTAACTGATTATTCATTTACCATTCTCTGGAACAAATAGCAGTGGCTTTCAG     | 9817 | A_95_P228864 EB451816     |
| 10322 | 122 | 37 | 651  | AACCGCTAATGTATCCCGTGTAAATAATTCCTGTTTTTGAAGTGGGTTCTGTTCA       | 9828 | A_95_P015526 TA12008_4097 |
| 10326 | 122 | 41 | 312  | CAGAGTCCCATGTACTTGTTGTGCGACATAGGAGAAAACAACCTCTGCAAGTTTTTGT    | 9836 | A_95_P213142 TA19985_4097 |
| 10327 | 122 | 42 | 279  | TTGGGTACTTGGGGCTGAAAATGTTAGGTTTCTAAGTTTTTGCTTGTCAATGATGT      | 8937 | A_95_P000091 AJ717873     |
| 10328 | 122 | 43 | 561  | CAGGGCATTGATGCCTTTTGTGGATCAGATTTTCTTATGCTTGTAAAAGAATGATC      | 9839 | A_95_P108412 FS436012     |
| 10330 | 122 | 45 | 893  | GCATATCCCGCAGTATGAACATTTCTTAGTATAAAAGAATCCAGTGTGTTTGCTAT      | 9843 | A_95_P181582 TA13014_4097 |
| 10334 | 122 | 49 | 513  | TATGAAGATCTATCTATGAAGGCCAAATCAAGATTTAGTGTCTCTTTGCGAAGTCTTT    | 9851 | A_95_P053651 BP133236     |
| 10335 | 122 | 50 | 486  | GAGTGTCTCCCTGAACAAAAGGAGATGGGATTGTGAAAGAAAAGGCATTGTGGTT       | 9853 | A_95_P122242 DW002268     |
| 10336 | 122 | 51 | 713  | ATTGAAGTCTAGTGGATAAAACTGAGAACCTCAGTTCAGGCTGACAGCTTTCAG        | 9855 | A_95_P146777 EB450884     |
| 10337 | 122 | 52 | 823  | TGAAGAAGAATGTGAGGCTGATGAACCAAAAGTTTGTGTAACCAAAATCTGGAGAA      | 9857 | A_95_P157432 EH615494     |
| 10339 | 122 | 54 | 694  | GTCCACTCTGGGTTACCCACTGTAAGTGAATTTGTGGAGGTAAATTTCTCTTTATTT     | 9861 | A_95_P217382 TA20920_4097 |
| 10343 | 122 | 58 | 826  | AACTAACAACATTAGGTAGGGCATAGTCAGATTGCAGTTAACTCCATACTGTGATCTT    | 9869 | A_95_P271731 EB445042     |
| 10346 | 122 | 61 | 489  | TCGTCACTGTGACTGAAGTATCAGTCTTTGGGAGATTATGTGCTTAAAGTTGCAA       | 9875 | A_95_P083270 BP528720     |
| 10347 | 122 | 62 | 810  | GGTAGAACTGAATACAAGCTAGCCGTCTTGCTATATGCCCTAATCAGTGTAAATGTTA    | 9877 | A_95_P273041 EB680971     |
| 10349 | 122 | 64 | 100  | AGTTGCTTTCACGGCTCGAACCTGTGACTTATAGGTTACACGAAAACAAGTTTACCGT    | 9881 | A_95_P242162 AJ719139     |
| 10352 | 122 | 67 | 666  | AAGAAATAGTTTTGGAAGGAGCGGAAGAGAAAACGGGAGGCAATTAGGCAGCTTTG      | 9887 | A_95_P260241 FG642865     |
| 10356 | 122 | 71 | 544  | ATGCTCATGAAGATGTAATTGTTAAGCCTGCGTCATAGTGTACGAGCTTCTGCTTGCT    | 9895 | A_95_P198897 FG628825     |
| 10360 | 122 | 75 | 614  | TTCTTTATGGTTTCTCAAGTATTCTACTAATGTTGAATGACCAACTTTAAGGGGTTCCG   | 9903 | A_95_P023767 TA14039_4097 |
| 10364 | 122 | 79 | 492  | AGGTTCTTATTTGCTGTAGTGTTAGCAAAGTGCAGTTTAAAGTTGTGTTGTATAAGT     | 9911 | A_95_P089288 BP530435     |
| 10366 | 122 | 81 | 763  | AAAGTTTGGGTGCAAAATCACTTCAGGTGGTCTTTCTGCAACAGAATGGGTTCAAAT     | 9915 | A_95_P116177 TA13182_4097 |
| 10372 | 123 | 2  | 900  | CACATTGCATGTACAATAAAAATGACATATATTGCATTGCCCTCTACTTTTTTCGGCTT   | 9925 | A_95_P134207 TA13354_4097 |
| 10374 | 123 | 4  | 1484 | GGAGTGGAACTGAATTTTACTTGTGTTAGTCTCCTAGGGATTCTATTAACATT         | 9929 | A_95_P208077 AJ344538     |
| 10375 | 123 | 5  | 200  | ATCAACTTGCCAATTCAACCATCCACCTAACAGGAACTGGTAAGGAAAGCATATCC      | 9931 | A_95_P133462 EB434968     |

|       |     |    |      |                                      |       |              |              |
|-------|-----|----|------|--------------------------------------|-------|--------------|--------------|
| 10376 | 123 | 6  | 845  | GCAATACAGTTTAGCAAATACTGATATTTCTCCGTA | 9933  | A_95_P192647 | EH616239     |
| 10382 | 123 | 12 | 687  | CTCCATTTTGGTTATGGAGTGGGTTTCAGTTACTG  | 9945  | A_95_P016216 | EB684198     |
| 10388 | 123 | 18 | 207  | CTCAAGTGGGACAAAGCCACGAGCTTAAGTTGGA   | 9957  | A_95_P106402 | CV017888     |
| 10389 | 123 | 19 | 150  | CTCTAGCCAGTACTATGTATTCTATTGACACAAT   | 9959  | A_95_P129987 | EB429951     |
| 10390 | 123 | 20 | 622  | ATTTAGTCAAATATAAAATATTTAGGTGTAATG    | 9961  | A_95_P250207 | DW001637     |
| 10392 | 123 | 22 | 466  | CAATGTAATGTCTCAATGGGAAGGATTTTGTGT    | 9965  | A_95_P002241 | DW004871     |
| 10396 | 123 | 26 | 1038 | ACAATATGCTTGTATTATCTACTACCTGGGGAA    | 9973  | A_95_P010196 | TA15624_4097 |
| 10397 | 123 | 27 | 868  | AGGTCCTGAGAGCATGCATACTAGATAGTGTGC    | 9975  | A_95_P272556 | EB450931     |
| 10398 | 123 | 28 | 363  | GTCTTTACGCCCTTTATTTGGCTCCTCTAAGTT    | 9977  | A_95_P138637 | FG625004     |
| 10399 | 123 | 29 | 645  | CTCATAGTACTAGTTATGTAACCTTACGTGTCT    | 9979  | A_95_P123217 | DW003092     |
| 10401 | 123 | 31 | 478  | TGCCTCATGTAATAGCTGTATGCTCATATTCAAG   | 9983  | A_95_P134172 | EB436143     |
| 10404 | 123 | 34 | 887  | CGGAGTAGGTCCCTCCTCATTGCATTGGATTATA   | 9989  | A_95_P019231 | EB425276     |
| 10406 | 123 | 36 | 408  | TCTGGGTGATTTAGCCAACTTGTGGGACTATTCT   | 9993  | A_95_P306683 | FG635964     |
| 10407 | 123 | 37 | 2107 | AGAATAACAATCGCCTGCGGTTGACTGCTGGAAT   | 9995  | A_95_P188252 | TA14529_4097 |
| 10412 | 123 | 42 | 725  | TATTTGTTGCAAGTGCTTTCTTATCTCTGCTTT    | 10005 | A_95_P133252 | EB434566     |
| 10417 | 123 | 47 | 2617 | CGTAGGAAGATCTTGGGATTGATTGTTCCAATAT   | 10015 | A_95_P212937 | AB032538     |
| 10422 | 123 | 52 | 318  | GATTTGCCCTAAACTCCAATAAAAGGGATGCCCT   | 10025 | A_95_P098043 | BP534308     |
| 10423 | 123 | 53 | 322  | AGTCAATATCAGTCATTCTTGCTAGCTCATTAGC   | 10027 | A_95_P102682 | TA12603_4097 |
| 10424 | 123 | 54 | 446  | ACTTGTGAGCATACCTGAGTAAAGTAATCACTT    | 10029 | A_95_P141922 | EB445531     |
| 10427 | 123 | 57 | 741  | AAATACAACAGCAGATCCTGCAGCAGATACCTAC   | 10035 | A_95_P153507 | EB683766     |
| 10428 | 123 | 58 | 836  | ATGCTTCAAGTCCGTTTGACCGGATGAGTATTGA   | 10037 | A_95_P135487 | EB438979     |
| 10432 | 123 | 62 | 313  | CCAAATCTTTTTACCCAAATCCTTTCAAGTCCTT   | 10044 | A_95_P092208 | BP531695     |
| 10437 | 123 | 67 | 997  | GAGGGTGGGACTGAAGATTTAGCCCCATAATGTA   | 10054 | A_95_P011061 | TA17064_4097 |
| 10438 | 123 | 68 | 834  | CAGGCTATAGCCAAGCTGGAAAAATCAGTTTGT    | 10056 | A_95_P190192 | TA14957_4097 |
| 10448 | 123 | 78 | 1056 | TGTGCCCTCTAAGTGGATTTACCGATGCCAAAG    | 10075 | A_95_P238739 | AB032198     |
| 10451 | 123 | 81 | 866  | CTGATCAATCACAAGTCTGATAGCTTCAATAGT    | 10081 | A_95_P017291 | TA12621_4097 |
| 10454 | 123 | 84 | 431  | TGTGAGACTCTCAAGTTGTGTTAGTGGTTTGT     | 10087 | A_95_P179147 | FS416927     |
| 10455 | 123 | 85 | 390  | GTGAACCTGTTTGTGAGACTGGCAAGTTGTGTT    | 10089 | A_95_P024051 | TA14666_4097 |
| 10456 | 124 | 1  | 603  | GTTTCTAAGTTGGGATTTTTGAGAAGATGATCT    | 9924  | A_95_P060425 | BP134993     |
| 10459 | 124 | 4  | 1547 | GTTGTGTTATGGCATGTTTTGGAACCTTGTGCA    | 9930  | A_95_P011816 | TA13725_4097 |
| 10462 | 124 | 7  | 363  | TGAAGCTCAGACTATATTTGATGCTTTGTCTAA    | 9936  | A_95_P156922 | FG643894     |
| 10464 | 124 | 9  | 532  | TTGGCAAGCTGTGCATATCTTACTTGTGGAACA    | 9940  | A_95_P131802 | EB435034     |
| 10465 | 124 | 10 | 760  | GGCAGAGATTGTAATCATCAATTCTATTATTGT    | 9942  | A_95_P206892 | DV160757     |
| 10467 | 124 | 12 | 818  | ATGGCTCTGATGGACCAGATGGTCATTTCAATC    | 9946  | A_95_P290733 | DW001012     |

|       |     |    |      |                                                             |       |                           |
|-------|-----|----|------|-------------------------------------------------------------|-------|---------------------------|
| 10470 | 124 | 15 | 1587 | GACGTGTATGTCTACAAGAATGCTTAGAATACCTTGATTATCCCTATATTGAGAACT   | 9952  | A_95_P008651 TA12972_4097 |
| 10473 | 124 | 18 | 744  | TAAGCATGGCTTTGCTTGAACCTTTTGTCTTCCCACTTCGCTAGAATGCTAAATTGTC  | 9958  | A_95_P160107 EH618757     |
| 10474 | 124 | 19 | 739  | GGAAATAGAGCAAAGGTGAGTCCCTTAGTTATAGTCATTCTTTTCTTTAACCTTC     | 9960  | A_95_P141282 EB445053     |
| 10477 | 124 | 22 | 504  | ATGCAATCAAAGCCGTTCTCTTGCAAGTTTCTGTCGTGCTATCACATGTATAATAAA   | 9966  | A_95_P163377 EH622289     |
| 10479 | 124 | 24 | 778  | TAACCCATCGTGGTGTGCAAATAGTGTTAGATTTCTCACCGGCTCAAGAAAAGC      | 9970  | A_95_P018166 DV161248     |
| 10480 | 124 | 25 | 711  | CAGTCCTGCTTCTGTAAATTTTTGTGCTTCAAGCAATCCAGCTGTATAATACACAA    | 9972  | A_95_P203067 EB440029     |
| 10481 | 124 | 26 | 603  | TCTCCTCCTCAATGGGCTTAAAACACTATTATTTATAATGGGCTTATTTCCCGTGG    | 9974  | A_95_P060940 BP135132     |
| 10482 | 124 | 27 | 193  | CATCGTGGTGGCATCTGTATTTTTCATTGTCTTTCATCATATTGTAATAATTGATTGCC | 9976  | A_95_P106862 CV018094     |
| 10494 | 124 | 39 | 561  | TGTCAAAGTGAGACACAAGATACCTGGTTTGCAGTTGACTCTCCTCGAATAACACAG   | 10000 | A_95_P055346 BP133677     |
| 10501 | 124 | 46 | 373  | TGCGTCTTTTCAAATGAAATGTCTGCTGGCTGGAGTAATACCTCATTTGACTCTTTAT  | 10014 | A_95_P149477 EB679332     |
| 10505 | 124 | 50 | 212  | TGTTTGACCTAATACTAAAAGTAGCTGTGAATGGGAACTAAAGGAGGATGAGATG     | 10022 | A_95_P032556 AB210290     |
| 10510 | 124 | 55 | 760  | AGTAGGGCTATGCATGATTTTCATGCCTATTGGTGTTCCTATTTTACTGCTAGTTGG   | 10032 | A_95_P125132 DW004936     |
| 10512 | 124 | 57 | 226  | TGTAATAAATGAAGCCCGGATGGCACACGTCATGTACCAATTTGGAGATGGATTTGC   | 10036 | A_95_P156352 EH613727     |
| 10513 | 124 | 58 | 547  | GTTTATTCGTTTTGTGACTTTTACTCGTGGGCGGTGGTGACCGCTACATGCTATTT    | 10038 | A_95_P108947 BP530129     |
| 10515 | 124 | 60 | 865  | CATTAGATACCATTCATTTTATGCTCTGCATAGATCTGGAGCTTACAAGCACCTAATG  | 10041 | A_95_P287833 EB427882     |
| 10519 | 124 | 64 | 354  | TAAAGAGGCGAAAAGGAAGCTGAATGGTTTATTGAAGGGGATTTGACGCATATGTA    | 10049 | A_95_P161217 TA14884_4097 |
| 10521 | 124 | 66 | 140  | GATCGATGGGTACCCGGTGAATATGTTTGCAGCTTATAAATATAGTATATTTCTGC    | 10053 | A_95_P120927 DW000908     |
| 10527 | 124 | 72 | 888  | CGGCATGTCCAGAAATGGAATTACTATAGTCTTATTTAACCTTGAATTGTGGATTCC   | 10065 | A_95_P217472 TA20940_4097 |
| 10533 | 124 | 78 | 914  | GTGTTTACTATGAATGTGGGAGGCTCAACGTGCCTTTTATGAATTTAAGTCATTAT    | 10076 | A_95_P000796 AB213651     |
| 10535 | 124 | 80 | 241  | AATGTGCCAGAAAAATAACAGAACAACGTTGAGCTAAAAGATCTGGTGATTGTTATC   | 10080 | A_95_P109037 CV019121     |
| 10536 | 124 | 81 | 417  | GCGGATGCAGTTGTAGTACTAGTTGAGGAAATGCTTTTAAATTTAATCCAGACAG     | 10082 | A_95_P097208 BP533931     |
| 10540 | 124 | 85 | 142  | CCACATATCAGTTCATGTACTGTATCTCCCAATGACTGTTTAAATAAAAAGCTTAATG  | 10090 | A_95_P129532 EB429494     |
| 10541 | 125 | 1  | 807  | TCGTTGGATTAATAGGAAAATGATGAGCTTGGTTCATGATCATTATCCTGGAATCATC  | 10091 | A_95_P215972 EB427456     |
| 10547 | 125 | 7  | 856  | CTTTTGTGCCATAAGGGGAGAAGAATGAAGCAGCAATGACAAGAGAAGAATGAAGCA   | 10103 | A_95_P131787 EB432202     |
| 10552 | 125 | 12 | 480  | CTGCAAAGAGCTCGTTGAGGAGATGGAGCTTGTGATCTTATTACTCGATGATTG      | 10112 | A_95_P222962 FG629636     |
| 10554 | 125 | 14 | 634  | ATCCTTAAAATGGTGGAAATGCTCAGAATCTCTAACTGAAATCTCCCTCCGGACAACC  | 10116 | A_95_P260451 BP128854     |
| 10555 | 125 | 15 | 157  | AAGGGCAACTTCTATCCTTTGGCATTTCCAATCCCTTTGAGACAGCACTTAATGAGC   | 10118 | A_95_P157317 FG640154     |
| 10560 | 125 | 20 | 225  | AGAGACCTTAGACGCTTGCAAATTACATTTTGTACAATGATGGTCTGTCTCCTGTTAA  | 10128 | A_95_P143817 EB447009     |
| 10562 | 125 | 22 | 560  | AATATTCATAGGACTCCGAGCACGAGACTTCTTGGCTAATATACCTTGAAGCATGGG   | 10132 | A_95_P241390 BP129934     |
| 10563 | 125 | 23 | 588  | TTGGCTTCAGGGATTGCTAAAAGAGCTTGGTATTGGATACAAAAGTATCACAAATTT   | 10134 | A_95_P046286 BP131356     |
| 10565 | 125 | 25 | 437  | ATGGCTATCCAAGGCTTCCAATTCTAGTCAATTTATGGCTCCTTCAATATTTACTATC  | 10138 | A_95_P083400 BP528751     |
| 10567 | 125 | 27 | 1946 | CCTTTCTGTACTTATCATTTTTCAAGGACTTGGGACTGGTTATACCAAATATTTGGGGT | 10142 | A_95_P154227 EF051140     |
| 10569 | 125 | 29 | 562  | GGGTTAGCATCTTTGATGTCTTTGTAAAGATTAGTCTCTTGTCAAATTTCTTTGGTA   | 10146 | A_95_P221622 TA21858_4097 |
| 10573 | 125 | 33 | 801  | GAAGATGAATCCAACGGAAGAGCTAGTAAGCGGCAGGTGAAGCTAACTGATATTGC    | 10154 | A_95_P209007 EB426833     |

|       |     |    |      |                                                               |       |                           |
|-------|-----|----|------|---------------------------------------------------------------|-------|---------------------------|
| 10574 | 125 | 34 | 147  | GCAGATAAAGCATCACAGTAGGAGTGCCTTTTTCTTTTTATAACCAGAACTATTCTA/    | 10156 | A_95_P152262 EB682586     |
| 10579 | 125 | 39 | 688  | AACCTCTAACTTTGTCTGCTGCCTGAAATTGTACAGAAACCTCTAATGGGAATGTCA/    | 10165 | A_95_P122417 DW002399     |
| 10582 | 125 | 42 | 485  | TGGGTTGAGGGAGCCTGTGCAAATGTTTCTTGGGAAGACAGAATTGAGAACCC/        | 10171 | A_95_P036228 BP128677     |
| 10583 | 125 | 43 | 867  | CCCACCGACAAGGTGTGAATTTCTGTCAATTTCTGATCATGACTATTATTTGTTGA      | 10173 | A_95_P180307 TA12712_4097 |
| 10584 | 125 | 44 | 699  | GCAACCTAACATGACCATCTCCCCTATATTTGCTTTAATGACAGTCTTTACTATACTA/   | 10175 | A_95_P192767 TA15525_4097 |
| 10592 | 125 | 52 | 705  | GGTTTGACTTATTGTCTCTATCTGGTTCATTTCTGCTGTCTGAAATTGGCGGTCAACG/   | 10190 | A_95_P137612 TA16714_4097 |
| 10593 | 125 | 53 | 414  | CCCTATTCAGTCTTTCTCTGTATATTTCTTACGTTTCATGTCAAAGCAAACATTTATGAC/ | 10192 | A_95_P028681 EB431359     |
| 10594 | 125 | 54 | 306  | GCTTAATTGTCCGTATACGTGTAACAAAGTGAATTTGTATCCGTAGACATGTTACTAT    | 10194 | A_95_P033241 AJ344584     |
| 10596 | 125 | 56 | 300  | GTCGCTCCATAGTCATTCTTTGGTGTGATGAGTATTATTTGCTATTAGTCTTATGCT/    | 10198 | A_95_P131347 EB431534     |
| 10599 | 125 | 59 | 836  | TTCTGTGAAGTGAATTCATGATGATATAATTACAGGTAGTTTGGACGCCATTGTTG/     | 10204 | A_95_P248707 DV158976     |
| 10604 | 125 | 64 | 734  | AATTTCTCTAACTGGCTAAGGAGAGCCACAAACACTCGTCCGTGCTATAAGGGTT/      | 10214 | A_95_P212942 TA19944_4097 |
| 10610 | 125 | 70 | 90   | CATGCCCGATGCTTTCTGTTTATTCTTGAGTCTATTTGTATTATAGTACTTAGTTACAC/  | 10226 | A_95_P161987 EH620690     |
| 10612 | 125 | 72 | 474  | GGATTATTGTAGACTGACCTAGAATGTTAAATGTGATGACTTTTGCCTTCATGTGTT/    | 10230 | A_95_P278013 FG643399     |
| 10616 | 125 | 76 | 716  | GAGGAATAACCTCTTTGTTGACAATGTTAATGTAGAAGAACAATGTCAAATTTAGG/     | 10238 | A_95_P127472 EB427008     |
| 10619 | 125 | 79 | 432  | CTTTTCTGCGGTGTTCCATTTCTGTGAATTGGTCTGTAGAAGCGATGGTTTCTTCT/     | 10243 | A_95_P006531 FG198048     |
| 10620 | 125 | 80 | 196  | AACTTGGCTTACACATTTGATTTTTCTGGTTGGGGGAATTTCTTTATTGGGCTTAGA/    | 10245 | A_95_P093308 BP532214     |
| 10622 | 125 | 82 | 854  | GAGGAGCAAAGAAATTATTATATGAGAACTATGGAAAAGATGATCCTGCTTGTGT/      | 10249 | A_95_P024846 EB426351     |
| 10623 | 125 | 83 | 316  | CCTGACTCGTTTATACGTTTCTGTCTGTGTAATGTCTCTCAAGTATAAGTGTTTTTCAT/  | 10251 | A_95_P090478 BP530969     |
| 10628 | 126 | 3  | 1061 | CTTGGTGATGCTCCAATGCACTTGGCTTGGCATCAATATAAATTGTTCCAGTTATCTC/   | 10096 | A_95_P211602 TA19651_4097 |
| 10630 | 126 | 5  | 837  | TCATGTTGTGGATTAGCAGATGGACATATAGCTGCCCTGCAGAAGCTATCCGATCC/     | 10100 | A_95_P222147 EB682214     |
| 10637 | 126 | 12 | 0    | TCCAAAATCCACAAAAGAAAAAATATTTCTGCTCAATTGAAAGGGTGTCCCTCAAC/     | 10113 | A_95_P023676 A_95_P023676 |
| 10640 | 126 | 15 | 830  | AGAAGAATACCTGAATGCAGAGGCTAAGTTAGTTACGGTGTTCAAGTGTAGTGGACG/    | 10119 | A_95_P118607 DV161686     |
| 10644 | 126 | 19 | 466  | TAGGCGATTCAATATTTCCCAATTTGTTGATACGACTTGTGGAATTTGGCAACCT/      | 10127 | A_95_P262501 TC74788      |
| 10648 | 126 | 23 | 635  | ATCGTAAATTCTGACGGGGAATCACGGTTGTATCAAATTTGCGAAGCATGCTTGGTT/    | 10135 | A_95_P295373 FG643778     |
| 10655 | 126 | 30 | 684  | GTTTTAAAGAGAATGACCAGCTTGCATATAGATTCTATGCCGTATGAAATCTGCCGT/    | 10149 | A_95_P071765 TA20024_4097 |
| 10656 | 126 | 31 | 864  | TTGGATTTGCTTAGAATGTGCTAGTTGCTTTCCAACAAAGATGGTTTCCGTTACTTC/    | 10151 | A_95_P015371 TA13072_4097 |
| 10657 | 126 | 32 | 432  | AGTCTTCGGCTAATATTAAGCCCAACAGATCACATTCGAAGAGAACAATTTAAGT/      | 10153 | A_95_P074365 BP526450     |
| 10667 | 126 | 42 | 335  | CAATTTCCGCTGGTTTTCTGATTTGAGTTTTTTCAGCTGAGAAAATTTGGGAAAAAAG/   | 10172 | A_95_P101098 TA12306_4097 |
| 10668 | 126 | 43 | 773  | GATCAAATGAGCAAATGATAGGTGAAAGCAGTGAAGACACTATCTAGAGTTATGAT/     | 10174 | A_95_P251372 EB447310     |
| 10670 | 126 | 45 | 378  | CTCAGATCCGCTTGTGATATGAAATTATTGTTGTTCTTTAGCTAACCTATGAAAGAAT/   | 10178 | A_95_P141212 EB445001     |
| 10671 | 126 | 46 | 884  | GCATTCAAATCGATAATTTTGCAGAGGGAAATGCACTACCTACAAGCTAACTTTTT/     | 10180 | A_95_P119462 DV162682     |
| 10672 | 126 | 47 | 837  | CCCAGTCTTTCTGTTGATTCTTGAGTGTATTTGTATTATAATACTTAATTACACGACC/   | 10181 | A_95_P197692 TA16619_4097 |
| 10675 | 126 | 50 | 840  | GTTCTGCAATCTGAATAGTTTCCGCACCAAGTTTATATTAGGTTTCTCCATCTTTCTGG/  | 10187 | A_95_P227795 DV161398     |
| 10684 | 126 | 59 | 458  | TTAAGAGACGTAAGCTACCCATAAAGGGTTGAAGCAAAGAGTTGGTAAGGCGATT       | 10205 | A_95_P158077 FG137231     |



|       |     |    |      |                                                             |       |                           |
|-------|-----|----|------|-------------------------------------------------------------|-------|---------------------------|
| 10689 | 126 | 64 | 628  | AATTTTGACACCCGACTGAGACCAGTGTTAAGGGCTCTGAAGTGTGATCACTGGTTG   | 10215 | A_95_P135447 TA13035_4097 |
| 10692 | 126 | 67 | 366  | GTCCGGGACTCTTGGGGTATAATATAGAACATTGTATGGGAGCTTAACTTTTGGTAC   | 10221 | A_95_P092568 BP531865     |
| 10695 | 126 | 70 | 621  | AGCAGTGTATATTTTCCAAGTTTCAGTGGGTTGGGTATAAATCAACCACAACCCCTT   | 10227 | A_95_P021336 FG638986     |
| 10696 | 126 | 71 | 346  | GGACAAGCTTACACGAACTTAGACAATTTCTCAGGTACCTAGCATTTTTGCTCTCTC   | 10229 | A_95_P096213 BP533523     |
| 10698 | 126 | 73 | 845  | AGCAAGTGGAGCATAAATGGAACCGACATGGATTAGGTGGTGATAATCTTGAAGGC    | 10233 | A_95_P285813 DV162116     |
| 10703 | 126 | 78 | 903  | GGGACAAGCCTCAATCTTGATTCTGATGCAGTTGTTTCTTCTATAAGTTTTCAATATC  | 10242 | A_95_P007801 EB429936     |
| 10705 | 126 | 80 | 874  | AACTTAAGCTGGAGAAGTTTCTCATGAGCTGCTACAACTTTTGTCTTTGAGTCTA     | 10246 | A_95_P291793 EB424895     |
| 10711 | 127 | 1  | 819  | AATTTCTTGGGGTGCTTTGGATGATGTTGTGATGGGTGGAGTGAGTCAAAGTACAT    | 10257 | A_95_P227459 DW001357     |
| 10713 | 127 | 3  | 326  | ATTTAATAATAGGGATGATATGCTATGTCGATCTTATTAAGTGTGGTGGATGGACGT   | 10261 | A_95_P109007 CV019107     |
| 10716 | 127 | 6  | 872  | TTCCACGGAGCTTCTCGTTGCTGTTAATCTTTTCGTAGCATAAAAGCTTAACCTGC    | 10267 | A_95_P196987 TA16462_4097 |
| 10723 | 127 | 13 | 426  | TGCCATGCTTGAGTGGGATGAAACATGGGATTGAGGATAAACTGACAGAAAAGGAT    | 10281 | A_95_P085065 BP529185     |
| 10726 | 127 | 16 | 1029 | ACATGTGGTTCGAACCTCATGTATTGTTCTGCGGCTCTTTTCTATTCAAAGTTTTAGCT | 10287 | A_95_P020486 TA16369_4097 |
| 10729 | 127 | 19 | 184  | CTGGCAGTTAACACAGACGCTATATTTGAGGATTGGAAGTTCTATAGATTAATCATT   | 10293 | A_95_P094788 BP532869     |
| 10734 | 127 | 24 | 543  | AGGGGGTAACTATGGATGTTGTATGGAAATAAGTATGTGATTATGCATGCATACGGT   | 10302 | A_95_P153142 EB683453     |
| 10736 | 127 | 26 | 832  | TAAATCGTGGTCATCTCAGCATCACTAAATGCTTTAAGCAGAATGCCGAGTAACGCC   | 10306 | A_95_P255609 FG147452     |
| 10741 | 127 | 31 | 627  | TTGTTCTAGGAAACGTTGTGTTCCCTCAGACCTGATCAGACAGGAAAAATGAAACAA   | 10316 | A_95_P157687 EH623052     |
| 10743 | 127 | 33 | 629  | AATGGCATTCTTGAATTCGAAATGCAATTCAGTATTCAGTATGTTTCTGCTCTC      | 10320 | A_95_P125512 EB102905     |
| 10746 | 127 | 36 | 375  | GGGAACCTTGAATACTCTGCACTATGTTGCTCTCTAGTCACTACATCATTATGAAGC   | 10326 | A_95_P186492 TA14139_4097 |
| 10748 | 127 | 38 | 558  | TAAAATTGAACTCTCCACCATTCTCTTAACATGCATACTTACAAGAACTACATCTTA   | 10330 | A_95_P046676 BP131459     |
| 10751 | 127 | 41 | 685  | TTATATTGGCGTGCTAGCTTTATATAAGTCATGGAACACACTGTCTCGCTGGTTGAT   | 10336 | A_95_P066215 BP136535     |
| 10754 | 127 | 44 | 702  | TGGCCAGCTTTCGAGATAATGAAATTTTCTTGAATTTGGCTTCGTTGATATTAGTAG   | 10342 | A_95_P180467 EB679246     |
| 10762 | 127 | 52 | 473  | AAGGAGTTGAAGTTGTGATTTTCTGTCCAAATGAAAAGCCCTGGCAGACTTTTATG    | 10358 | A_95_P073580 BP526245     |
| 10767 | 127 | 57 | 801  | GCTGGAAGTGAAGTACGATTCCGATTTGATTAACATTCTACTTGTGAATATTTCTTG   | 10368 | A_95_P117602 DV160541     |
| 10771 | 127 | 61 | 666  | CTTGTAATAAACTTTGCCATCAGTGTGCACTTAAAATAAATGAATAAGTGGGTGTTG   | 10376 | A_95_P033414 AJ632718     |
| 10778 | 127 | 68 | 774  | GGCAGAAAATTTGATCGGTTTCTCCATGAATCATACATTGAGGACAATAAAAATGGT   | 10390 | A_95_P314238 FG168120     |
| 10782 | 127 | 72 | 842  | AAGAGTATAAAAGGCTTCGAGCAGTCTTTGGCGAAGTGTATCCTGATCCTGTCCGG    | 10398 | A_95_P227354 EB682108     |
| 10783 | 127 | 73 | 433  | AGTGTAGCAGTATCGCCTTCTACTATACGCTCCTCTATCTTCTCAGCATCAGAATGA   | 10400 | A_95_P276078 AM783100     |
| 10785 | 127 | 75 | 745  | GACATGGGAAGACTTTTCGTTCCCTCACCTCGCAATTTCCAGATTTCAACCTGAAGATC | 10404 | A_95_P156972 EH615037     |
| 10787 | 127 | 77 | 269  | TTTTGGACTAGATGCCTGTTTGAATTGGTTATGTATGACGATGAAATGAAAAAGGCT   | 10408 | A_95_P132207 EB432656     |
| 10791 | 127 | 81 | 872  | CTGCTGTTATTATAGCTGGCAAGGAAGGAGTCAAGTGTTCAGAGCAAGTGAACTCTC   | 10416 | A_95_P187367 EB679898     |
| 10792 | 127 | 82 | 209  | GTGGCTTTATAATAAGCTGTTGAAAAAATCAGGCTGAGTTTGTCTGTAGTAGCTTTC   | 10418 | A_95_P099943 BP535137     |
| 10797 | 128 | 2  | 794  | TGCGGAGGTGAATTTGAAATCAAAGCAGTTTTAGAGTATTGATCGGGGCTATTTGA    | 10260 | A_95_P142667 EB446089     |
| 10800 | 128 | 5  | 158  | TTCCATGATCTCGCCGAGCTTTTATAGGATTGGCGGACAGTGTCCAGATACAAATTATC | 10266 | A_95_P001826 AJ718115     |
| 10801 | 128 | 6  | 487  | GATTGAGTTATTGCACATTTTACTGGGTGACCATTCAGAGTTTTACAGCCTTGATACT  | 10268 | A_95_P170234 EH664856     |

|       |     |    |      |                                                               |       |                           |
|-------|-----|----|------|---------------------------------------------------------------|-------|---------------------------|
| 10813 | 128 | 18 | 1437 | TGGATTCTGTGATCGAATGCCACTAGACAGAATTTCTCAATATGAGAGAGCCATTCT/    | 10292 | A_95_P025451 TA12737_4097 |
| 10822 | 128 | 27 | 729  | ACGCATGTTATATTGGTGTAGATCCAAGAAGCTCTTGCCTAGTCTATGAGTATTTA'     | 10309 | A_95_P162412 EH621341     |
| 10824 | 128 | 29 | 540  | TATATCGTTTCAGATATAATTCTTAGGCTTGGATTGGACTGGGGCGGCAGGAATTTG'    | 10313 | A_95_P071835 BP525804     |
| 10825 | 128 | 30 | 812  | TGTGTATGTATGGTGTACCCCTCTAATCGTGAACGGCTTCTTGTCTTGATCACTTAC     | 10315 | A_95_P150207 AY660024     |
| 10827 | 128 | 32 | 500  | GCACCACTATAACCATCATTGACTACAAAAATGTCTTTATTAGCCGAACCTCAAGCTATC  | 10319 | A_95_P125402 DW005190     |
| 10830 | 128 | 35 | 869  | GTACAAGTGATACGGATACATATGTACGTGATTATTGGCGAAACAGCACGCAAGTGC     | 10325 | A_95_P223027 DW000906     |
| 10831 | 128 | 36 | 806  | GTTTCGGTTTGAACCTGCGTTTGTAGAGGTCATATTGAGAATTTGCTGATTATAAACATCT | 10327 | A_95_P186112 TA14056_4097 |
| 10838 | 128 | 43 | 609  | ACTTTTGCTATTAACCGAGACCAATTTAAGTTTGTGAACCTCGATTGACTTATGGAA'    | 10341 | A_95_P214512 EB428418     |
| 10839 | 128 | 44 | 961  | CAGTTGTATTTGGAACCTGGATTTATTTAAATGGTACACCGAAGTGATACTCAGCAA'    | 10343 | A_95_P007646 AB119468     |
| 10840 | 128 | 45 | 269  | TTGATGGATACAGCCCATCTACAAAACAGATGACTGGTCTAAAAGTGGTGTATGTAT     | 10345 | A_95_P109327 CV019244     |
| 10841 | 128 | 46 | 204  | ACACATCCACCGTGGCAAGATTTCTGGTTTTCTCTCTGATTTAAACCTCCATATAAGT    | 10347 | A_95_P104297 CV016932     |
| 10842 | 128 | 47 | 834  | AAGAGAGTCAGTATGAGCTTCTGTTGAGGCCGAGAAGATAAGTTTGGGAGCATCA'      | 10349 | A_95_P231719 FG159329     |
| 10843 | 128 | 48 | 597  | GTATCCGTGGCAGTCTCAAGAAGTAAAAATAATAAATAGTCTTTGTGGGTTGACATC     | 10351 | A_95_P002086 FG644428     |
| 10853 | 128 | 58 | 397  | ACAATTTCTTCACACAATTTTTACTGCTGTCTAGTTTTCTTGGAGTTAAATCTACCTGT   | 10371 | A_95_P129962 EB429906     |
| 10856 | 128 | 61 | 144  | CTCAAAACCGTGGATTCTTATACATAAATAGGACGAATTGTACAAGACGAAGTGGGGC    | 10377 | A_95_P065645 BP136390     |
| 10857 | 128 | 62 | 477  | ACACGTTTATCCAGTTTGATCCAGCTCCAAGAAGGGGACGAACGGATGTTAAACGA/     | 10379 | A_95_P112177 CV020558     |
| 10858 | 128 | 63 | 384  | GTTGTGGAGGTGTTGCTTCCCAATTTTTGGTTATCTCTCTCTGCATTTTACATCTGG     | 10381 | A_95_P090383 BP530929     |
| 10864 | 128 | 69 | 778  | TACTTGGGCATTGGCCTTGATGTTTTATTGTAATGTTAATGTATTGCTAGTTTGCCT     | 10393 | A_95_P026651 DV999095     |
| 10873 | 128 | 78 | 451  | AAGAAAAAAGACAGCAGCACCTTGCAAGAAGATTCTGGTGAATCAGAGGAGGCTAT      | 10411 | A_95_P076235 FS377087     |
| 10874 | 128 | 79 | 549  | ATCAAATGTCGTTGGGTTGTTGGTAAAGTGATACTGACTACACTAATTTACGTTTG      | 10413 | A_95_P068365 BP137111     |
| 10880 | 128 | 85 | 492  | CCATTTGTATCGTGCACAATTTTTACGGTGTCTTCTGGTTCTCACTTGGCAGGACA/     | 10425 | A_95_P047881 BP131767     |
| 10881 | 129 | 1  | 398  | TACTCAAATCTCAGTTCCAAGTCTAAAAGTGGTCTGTACATTGAACATCTTCTATC      | 10426 | A_95_P109752 CV019435     |
| 10882 | 129 | 2  | 561  | TCCAGAAGTTTTGAGGCCAGGTACATTATGATTTATTACAGATCAATTTCCCTTATA     | 10428 | A_95_P225087 DV161940     |
| 10884 | 129 | 4  | 467  | CCACTTCCCATTCTTACCATGAATGTCTCTGTACAGAATTACCAATTAATCTATACTT    | 10432 | A_95_P308343 FG642093     |
| 10887 | 129 | 7  | 282  | TAAAGACGGTACCGGTTGCGTCTGTTGTATCGGATCTCAAGCATATCCTTACTAGTAT    | 10438 | A_95_P111892 EB683945     |
| 10889 | 129 | 9  | 1125 | GAGGCCACTGCTCATAATTTTGTAAAATTTATTTAGCCGTTTGAATAGAGAAGCATG     | 10442 | A_95_P201507 TA17439_4097 |
| 10891 | 129 | 11 | 853  | ATGAGGATATCTATCCAGTGCAAATACGCTGCCATTGATCTTGCAACTGGAGTACCT     | 10446 | A_95_P296988 EB680653     |
| 10900 | 129 | 20 | 474  | ACATCATGAAACCTAGGTACAGACCACAATTGACAGTTGCTGTTCTCATTCTTTCTTC    | 10464 | A_95_P191597 EB425970     |
| 10902 | 129 | 22 | 383  | GAGTTTCAACTGCTGTTGGTATTAATGGTTACAGAGAACAACTTTATGCTGATATC      | 10468 | A_95_P024961 TA18401_4097 |
| 10903 | 129 | 23 | 588  | CAGAAAAGGGAACAAGGTGCTTAAACGAGATGAATTGGATAATTTTGTAGCGGATAA'    | 10470 | A_95_P089293 FG642298     |
| 10908 | 129 | 28 | 612  | TTGATCATAGCACAAAAATGCCAGTTTGGATTTGTAACATGTATGAGTAATCTTCCCC    | 10480 | A_95_P228539 DW000999     |
| 10912 | 129 | 32 | 1527 | GTAACCTATTTTGTGAATCTGAAGGAGTGACAGTTAATCGAGATTGAAAAAGTCTT'     | 10488 | A_95_P197117 TA16493_4097 |
| 10913 | 129 | 33 | 1009 | ATATGCTCAGCGACTTTGCCCTTCAACATTTTATTTAATTGAGATTAAGTTTCTCTCC    | 10490 | A_95_P008341 TA12270_4097 |
| 10915 | 129 | 35 | 344  | TCCAATGCTGACTTATATGCTCAGTTGCAAGAAGAGTGGCGCAAACTAAAAAGATG      | 10494 | A_95_P217087 FG638032     |

|       |     |    |      |                                                              |       |              |              |
|-------|-----|----|------|--------------------------------------------------------------|-------|--------------|--------------|
| 10919 | 129 | 39 | 792  | GGAGACAAAGTACTACCAAGTTGTAGTGTAGTCGAGTTCATCAAAAAACAGTTATT.    | 10502 | A_95_P271141 | EB439824     |
| 10922 | 129 | 42 | 239  | GCACGAACTACTTTGGAATTGAGACATAGTTAATTGATTGATATTGGTGATTGGTGT    | 10508 | A_95_P077390 | BP527234     |
| 10924 | 129 | 44 | 576  | CGACGTTGTTAAAGTGATTCTTCTCCAACAGGTTCAATTATGCTACTTCTCCTTATTTT/ | 10512 | A_95_P091223 | BP531260     |
| 10925 | 129 | 45 | 486  | GTTTAAGGGCACATTTGCGTCTACCATTGGCATTGGAATATGATCTCAGTTCTTGGA    | 10514 | A_95_P249642 | FS417360     |
| 10926 | 129 | 46 | 565  | GCACTTCTGCCCTCCCAAAGGCTTAAGGCAAATTACAAAGGAAATCCGCCTAATATTT   | 10516 | A_95_P197527 | TA16582_4097 |
| 10929 | 129 | 49 | 761  | TAAACAGACATGGAATGGCAATGCTGATAGGCATATTCCTGGATGGGAGAATGGG      | 10522 | A_95_P235364 | EB426628     |
| 10931 | 129 | 51 | 626  | GACAAATAGGACTCATTCCGACTATTATATTGATCATCAATAAGAGGGATTTCTCTGA   | 10526 | A_95_P181057 | TA12889_4097 |
| 10933 | 129 | 53 | 1328 | GTGAATCTCCTAAGTGGAATATTGAAGATACAGGATCCAAGTTTATAGCCATTTCTT    | 10530 | A_95_P008936 | Y14431       |
| 10936 | 129 | 56 | 96   | GACTCGCAAAATTTTTGCGTGTAGGTTAAGCAACTCTTGAACATTGAGATCAAAAC     | 10535 | A_95_P010886 | EB450337     |
| 10937 | 129 | 57 | 398  | TACCCCTTTTGCATGTAGTACATTCAAACAATCCTTGTATATTTAAAGAGTATGCAGT   | 10537 | A_95_P215837 | TA20575_4097 |
| 10941 | 129 | 61 | 112  | TAGGTTGCTTTTGTGGATCATGGCTGAATTGGCTTTACTCAGGACTCATCAGACTCAT   | 10545 | A_95_P115227 | DQ460200     |
| 10942 | 129 | 62 | 182  | TGGGAAAATGTTCAAAGTTGTCCTTCTCCCTAAACTTTGCCTTCCATTA AAAAGTTGG  | 10547 | A_95_P118282 | DV161293     |
| 10945 | 129 | 65 | 823  | AAGTACATTGCTTCAATTGCAAATATGCTGAACTTTCCGAACAATAACCTGAACAATG   | 10553 | A_95_P150347 | EB680433     |
| 10947 | 129 | 67 | 786  | TGTTTGAATTAGTTTGAAGGCGTAAGTGAACGCACATGGACAATGAACCCAGGA       | 10557 | A_95_P235459 | EB432254     |
| 10948 | 129 | 68 | 794  | ATGATTCCTCATGCTAACTGTTTTGCCTTCTCCATTGCTTAGAGATGTGTAAATTT     | 10559 | A_95_P163602 | EH622640     |
| 10950 | 129 | 70 | 765  | GCATTCAACCTCATTTGTGAGACACATAGGTATATTAGTTTGTGACTATAATATATGC   | 10563 | A_95_P265886 | FG643711     |
| 10951 | 129 | 71 | 780  | GAAGTTGAGCTTTTTAGTTGGCCGACCTTGGCAAATTAATGAACTGATCTGTTAC      | 10565 | A_95_P263606 | FG641644     |
| 10952 | 129 | 72 | 693  | CTCAACCATTAGCACTCAAAGAAGTGATGAAGGCTTCTTTGAGGCCTATCTTATGGT    | 10567 | A_95_P304903 | FG199258     |
| 10958 | 129 | 78 | 302  | TAAAGCCACGAATGCAGCTTATGGAATCGGACTTTTGAATCTGATACGTTTGGTAGG    | 10579 | A_95_P077165 | TA20316_4097 |
| 10959 | 129 | 79 | 339  | TTGAGTCCGGTGATTATGCCAACAGAAGAGCCTGAAGCTATAAGCCTTTTGCTGCCT/   | 10581 | A_95_P133307 | EB434714     |
| 10966 | 130 | 1  | 606  | GGTGTCTTCCCAACATTAACCCAATTTAGTTGCCTAAGAAGACTGGAGGTGATAAG     | 10427 | A_95_P107687 | EB447792     |
| 10968 | 130 | 3  | 2636 | TCTCGACGTGTGTGATCCCCATCACCCCATTTCTTGGAAAAGTAGACTTAATTTTC     | 10431 | A_95_P016996 | TA15059_4097 |
| 10975 | 130 | 10 | 762  | TTGGAGGCTTAACAGTACAAGTGCAACTAATGGTTACGGATGGGACATGCAATTTCT    | 10445 | A_95_P230229 | DV999783     |
| 10979 | 130 | 14 | 300  | GACTTTCACCATCTTTGAAGAACTTCTTGCTCAACATAATGTCAGGTGGGGTTGTGC    | 10453 | A_95_P110222 | EB431631     |
| 10981 | 130 | 16 | 616  | AGCTCACTTTTACGATTGCTTCTGGATGTCCTACTCGGAATATGTCACAGTGACA      | 10457 | A_95_P062920 | BP135644     |
| 10983 | 130 | 18 | 710  | ATCATCGATATGCTGTAGATCAGCTAACTTTTCCGTTTTCTGAAAGATGAAATGTGG    | 10461 | A_95_P159737 | EH618182     |
| 10985 | 130 | 20 | 875  | TCAAGTCAATTTACGCTGTTGGAGCGTAGATGGAGAGTTAAGTTTTACAGTTTTGA     | 10465 | A_95_P259226 | DV157889     |
| 10986 | 130 | 21 | 116  | TCTGGGGGACATTTGCTTTCATGGACAGTCTCTGAAGAGAGCTTGAAAACCGCAATT.   | 10467 | A_95_P069845 | AM816107     |
| 10990 | 130 | 25 | 303  | AATTCAGATTGCAGGAGCAAAGTGAAAGCTGCTGAGGGGGAGTTGCAACATCGTAA     | 10475 | A_95_P040966 | BP129969     |
| 10996 | 130 | 31 | 367  | TATTACAGCTTCGTAATTGTAATATGCCTCTGGCTGCTACTTTCTTAACAAATTATTG   | 10487 | A_95_P096168 | BP533503     |
| 10997 | 130 | 32 | 503  | TTCATGGTGGTTGTGATGTTTTGATGCCAAAATTAGTAGAGAATATGGATCCCGAA/    | 10489 | A_95_P104607 | TA13106_4097 |
| 10999 | 130 | 34 | 560  | TTAGTACTGCTGGTCTTCTGAGGTCGTCTCATCAGCACTCAAGACTTGTATTAATAG    | 10493 | A_95_P288763 | FG641047     |
| 11000 | 130 | 35 | 883  | CACTTCTGTGTATGACATCAAGTTCACCGCGAGAATCAGTTCAATCTTAAAGGATT     | 10495 | A_95_P009691 | TA12879_4097 |
| 11004 | 130 | 39 | 1583 | ATTAAGCCTTGTGTCATTTCTTGTGTTGGCAATCTATGGTGTGGCCGCTTGCTGC      | 10503 | A_95_P191387 | TA15224_4097 |

|       |     |    |      |                                                             |       |              |              |
|-------|-----|----|------|-------------------------------------------------------------|-------|--------------|--------------|
| 11006 | 130 | 41 | 474  | ATGGTGTATTACCCAGAAAGAATAGTGATCTGTGTATGCAGAGTTTGAATGGGTTTT   | 10507 | A_95_P021831 | FG638812     |
| 11007 | 130 | 42 | 633  | ATCCATGTATTATGAAAGTTTGACGCCTAAATGGCTGAAATCAGTTGAATCTCCTATG  | 10509 | A_95_P019751 | TC54833      |
| 11009 | 130 | 44 | 656  | CCCTTCCCGAATCCCGCGCATAGCGAAAATTTAGTGTTAAGTGTACGAGCTGCTTTT   | 10513 | A_95_P122937 | DW002850     |
| 11012 | 130 | 47 | 808  | TTCTGCGATCTGCTGCTTAATTTGATGGCTCTTCTACTCTGCGCATGCATTACTATGAC | 10519 | A_95_P295768 | FG164981     |
| 11025 | 130 | 60 | 456  | CATCTTTCCTTTTGACATCTCTCAAGTTGCACCTAACAGTATTTCTGTGAATGTTATGT | 10544 | A_95_P223617 | TA22291_4097 |
| 11027 | 130 | 62 | 1099 | CTCTGCCAACACTATTATCATGTTGGTACGTTTGTGTTTGGTACAAATTTCTAAGAGT  | 10548 | A_95_P199642 | TA17038_4097 |
| 11029 | 130 | 64 | 542  | GCGGGCGTGCCTGTTCTGTCAGTGTAATAATGAGAATTTCTCCAGTGTAAGA        | 10552 | A_95_P123152 | DW003058     |
| 11034 | 130 | 69 | 242  | AAAGGAGGATAAGGTAGTGGTGATAGAGGGTACTATTACCGAACGATGTTAGGGC     | 10562 | A_95_P110202 | CV019619     |
| 11037 | 130 | 72 | 127  | GAAGACTATCACTGATTTCTTTAGGTCCATCATCAACTTCATTAACGTGTTTTTGCAA  | 10568 | A_95_P108012 | FG635120     |
| 11038 | 130 | 73 | 543  | CCAGTAGTCCTCCATCTTCTCAGTACTAAACTTGACTTTGTCTGATGTATATACTAT   | 10570 | A_95_P221452 | EH622684     |
| 11039 | 130 | 74 | 871  | AGTTTGATTTTTTGAACGAACCTCTCATCTCATCCCCATTGTCTTTACCTCGGGCCA   | 10572 | A_95_P294163 | EB439934     |
| 11043 | 130 | 78 | 812  | TATACCTAGGATGATCACTGGATATGGAGCAATTCGCTCACATGCTGGTTCAGTAGC   | 10580 | A_95_P311633 | TC41992      |
| 11049 | 130 | 84 | 549  | GATTGTGTTTCCAACCTTTATAATCTCTCTTCAGCCATGTTATGATTTGGAAGTGCGA  | 10592 | A_95_P152787 | EB683132     |
| 11052 | 131 | 2  | 810  | GGTGTGATAGCTATTTTCAATCTCTAGCTAAGATGACATATGAGAACAACATTTGGT   | 10597 | A_95_P214842 | EB449765     |
| 11063 | 131 | 13 | 630  | TCAGAGGCTTTATATGTTGCAGAACAGAAAGCTAGAGAAGCGGTTGCAATGCGGTC    | 10619 | A_95_P121477 | DW001549     |
| 11065 | 131 | 15 | 325  | AGTTCCATTTTCAGTCAGGGTATTTGATTGCGTAAATGTTACATTAACACGTGTAGA   | 10623 | A_95_P090183 | BP530839     |
| 11068 | 131 | 18 | 602  | CTTGACTTGTGAGGATTTGCCTGATACTCAAACAGGTTTCTTAACTTAATCAACATG   | 10629 | A_95_P186997 | DV999544     |
| 11069 | 131 | 19 | 543  | TACATCTTACTGGCAGATCTCAATAACTGGCACCTATTTGCCATCTTTACAAGCTAA   | 10631 | A_95_P252419 | EH620138     |
| 11071 | 131 | 21 | 504  | TAATTAAGCTCCTTTCTTTGATTCTGCTACAGGCCCTAATAGATATTCGCAATAGAC   | 10635 | A_95_P068815 | BP137222     |
| 11076 | 131 | 26 | 816  | GCATTAGCTGGCACTGGTCTTCCATTGATAGGTTTATGACTTCTGATTATTGGGGT    | 10645 | A_95_P205272 | DV161936     |
| 11078 | 131 | 28 | 440  | TTGTTTAGGTTGGTGGTATGAAAATAAGGTGGTCCAAACAGTTGAGATTGCATCTC    | 10649 | A_95_P094713 | BP532842     |
| 11081 | 131 | 31 | 742  | CTTAGAACTTCAGAACTTATCTTAAACAATCTTGCCTCCCCATTAGTTATATGTACCT  | 10655 | A_95_P208852 | EB683961     |
| 11082 | 131 | 32 | 429  | GTCGTTATTAGGATGTTAACTTTAGTAAGCTCTCTATAGAGTTGTGTATCACCGGTT   | 10657 | A_95_P153942 | EB684093     |
| 11086 | 131 | 36 | 818  | TATTACACTAAGAATTTTCATGAGCGTGAGCATTCCATGTGAGACTGTTGACACACGA  | 10665 | A_95_P249137 | FG160796     |
| 11092 | 131 | 42 | 516  | CAAGGAACAAAGTTCATTTCTAGAAATTACGATGGTTATATTCTGGCTCGTTGTTGT   | 10677 | A_95_P241330 | FG644689     |
| 11093 | 131 | 43 | 544  | TAGTACGTTTGGGCTATTAGGATTTTGGGGATCTTAAATTCTGTGAGCATTGGTTGT   | 10679 | A_95_P026951 | BP526356     |
| 11094 | 131 | 44 | 923  | AAAGCTACTGGTAATGCGTCTCTGAGTTGCATTGCGTCTACAAAGGAATAATGATC    | 10681 | A_95_P229474 | EB680954     |
| 11096 | 131 | 46 | 3005 | GAGGCGTACTCTTGATTTCAAGTGAATGTGGATCACCTGGAAAGGGAAAGGAAACTG   | 10685 | A_95_P238434 | AB056123     |
| 11102 | 131 | 52 | 532  | CACTCTGGTCGTACGTGTGATGATTGTTTGATAATAGGTCAGTTGAGTTCATGTAGTC  | 10696 | A_95_P213257 | TA20009_4097 |
| 11105 | 131 | 55 | 557  | GGTTTCTACCGCGGCATGTACAATATCGCGTCTATATTAGAGCATATTTAAAATA     | 10701 | A_95_P234979 | FG633459     |
| 11107 | 131 | 57 | 234  | AGGACCATTTCTATCCCGTTGCAGTTGATATTATGCTTCAGATTGCGAGAGGAATC    | 10705 | A_95_P059525 | BP134763     |
| 11116 | 131 | 66 | 264  | ATCAGTGGAAGTCTTCTCAAGTCAAACAGCACAACAATTGGTACAGAATTTTCATG    | 10723 | A_95_P092263 | BP531724     |
| 11120 | 131 | 70 | 861  | GGTTTATGTCCCTATATACCTATGTTTCATGTGTTTATGCGAAATACTTTGTTGGTGA  | 10731 | A_95_P266966 | DV157625     |
| 11121 | 131 | 71 | 823  | AATACGCAGACATGATGCAACTTTTCTGCTCTTATGGCGAGGGAAATGGGGTTCAT    | 10733 | A_95_P254714 | EH616218     |

|       |     |    |      |                                                              |       |                           |
|-------|-----|----|------|--------------------------------------------------------------|-------|---------------------------|
| 11122 | 131 | 72 | 134  | GAAGTGTCCAGCTACACGTGCATGGCAGAATACCTTTTGTCTAATTCGCAAGGAAA     | 10735 | A_95_P041916 BP130219     |
| 11124 | 131 | 74 | 585  | ACCCTTCAGTTGTAGTGCCGTTCCAGTTTTGTTTCTCATCTGTAAAGAATATCGATTTAC | 10739 | A_95_P123747 DW003636     |
| 11125 | 131 | 75 | 700  | CTTTTTGGATTCTTCTTGGCAAACGAGTCTAGCTTTTCCCAACATTCTTGCTGAGGAC   | 10741 | A_95_P211452 TA19613_4097 |
| 11127 | 131 | 77 | 1440 | GTGGGTGAGATGCAAGTTGTGGTAGAAATAGTGAGATGTGTTATGATTTATTAATT     | 10745 | A_95_P184062 AJ438615     |
| 11129 | 131 | 79 | 780  | GTGTTTATGTGGTCTCACTTGTTGATGTGGTTCGTGATTCTTATAATGTATACAAGTA   | 10749 | A_95_P017366 TA15605_4097 |
| 11130 | 131 | 80 | 1102 | TGTACCTTTTCGAGGCATTTGTAACTACTGAACGTCTGAGCTTTGCCCATCTTGTC     | 10751 | A_95_P176287 U44760       |
| 11132 | 131 | 82 | 789  | GACGAGGAATGAATTAATGGTGCCTTAATTTTGTCTTGATATGCATTGAATTATCGE    | 10755 | A_95_P131497 EB431800     |
| 11135 | 131 | 85 | 499  | CTGTTACGTGAATCACTCCAATAATCATTTGACTCAAATACTGAACCTCATTTTTCTG   | 10761 | A_95_P008711 EB446681     |
| 11141 | 132 | 6  | 573  | GTACCAAGCATTACATGTATGGATTTCTTCTCCCAATTTTACCTACAACCTTACATTG   | 10606 | A_95_P124877 DW004687     |
| 11143 | 132 | 8  | 854  | AGTCTTTGATTCCAGTTATGATGGACCGGTTTTGGGAAATGAGAGGAAATTGGTGA     | 10610 | A_95_P034499 TA13733_4097 |
| 11145 | 132 | 10 | 606  | CTGTGGATGATTTTAGCTTTAGGAAGTGTGTAGATCAGATACAACCCCTCCAGCGA     | 10614 | A_95_P203217 TA17806_4097 |
| 11147 | 132 | 12 | 387  | ATAACCAGCTCTGTTTTGGTGTCTGCTCAGGGCGCAGCCAATTTTTTCATGACATTCT   | 10618 | A_95_P060380 BP134981     |
| 11148 | 132 | 13 | 695  | AGAGTGTGGTTCATGAAAACGCTTATCTCAGTGAATTTTCATCATTGTTTCTCTATAC   | 10620 | A_95_P137812 FG167434     |
| 11149 | 132 | 14 | 125  | GTCGTGACCAACTTTTCGGGCTGTAATTTTCAAGTGTACATGTCGTTCTTCTAAGCT    | 10622 | A_95_P089748 BP530637     |
| 11153 | 132 | 18 | 443  | CGAGCCTCGGAAAACAACCTCAAGACCATATTGATTTACAATCATCAAACCAATGTG    | 10630 | A_95_P065155 BP136256     |
| 11156 | 132 | 21 | 740  | CACCCGATGTCGGGCTTGCATTTTATTCTGCACTATTCATTTAACTTATATCATAA     | 10636 | A_95_P235579 EB678672     |
| 11160 | 132 | 25 | 1503 | CTCACATTACTGCGATGGTACTTTCTTGTGTAATGTGTTAGCAATTTGTTGCCTAA     | 10644 | A_95_P199767 TA17063_4097 |
| 11165 | 132 | 30 | 760  | CAAACCCAGGGGTAGAGGAAATAGTTTCTACGGTAATGAGAACATGGATGGTTAA      | 10654 | A_95_P138127 EB441864     |
| 11169 | 132 | 34 | 2485 | TCGACTCGAAATCCCTCCTTTGCTGTCAGTTTATAATTTATATTTGGATCTTCTATAG   | 10662 | A_95_P204672 TA18114_4097 |
| 11171 | 132 | 36 | 1711 | GTGATCAAGGACATGCTTCTATGCGATTGTATCTGTGGTTTATATTTGTTTCGATAG    | 10666 | A_95_P202862 TA17731_4097 |
| 11177 | 132 | 42 | 737  | ACTTCAATGATTTCATCCAATGGGTTGGAGAATGTCACTTGATTTGCAGCTGTTCCA    | 10678 | A_95_P315613 FG198033     |
| 11179 | 132 | 44 | 780  | GAATCATTATAGCATGCAAATGGGTTGGAGTGATATAGCATAGCATATCCGTGTCGT    | 10682 | A_95_P027101 EB681640     |
| 11183 | 132 | 48 | 541  | TCCTGGTTATGATCAGCAACAAGGTTATAGCTCTACTCCCGTTACGGGAATGTACCA    | 10690 | A_95_P002211 FG149075     |
| 11190 | 132 | 55 | 741  | CTATCTTAAGTGCATTTACGTCAATGTAAAATTGTGCGCCATTGATTAGGCAATTTA    | 10702 | A_95_P187207 DW001436     |
| 11194 | 132 | 59 | 389  | TGTGGTTGTGATTCCTTATCTGGGTTACTACTGATTAGTGCAAAATGTTCTAGGTTT    | 10710 | A_95_P212767 TA19905_4097 |
| 11196 | 132 | 61 | 845  | ACGCACAAAAGTGGCTGTACTTGGTTGGGCCTTTTGGTCATATTTATCGTTATTTCTA   | 10714 | A_95_P193577 TA15702_4097 |
| 11197 | 132 | 62 | 514  | TCTGCCTATTCCTGTTTTATTTGGAATTAGGAAGCCAAGTTTACTTAAATGTAGTACC   | 10716 | A_95_P121932 DW002007     |
| 11206 | 132 | 71 | 554  | CATGTGGCCTGAAACACTTTCCATCTAGCATCTTTTGCCTCTATTGGGATTTGAACTCT  | 10734 | A_95_P141792 EB445416     |
| 11207 | 132 | 72 | 514  | TATCATGAAAGTTGGTTACTGACTCTGACTTGCTTCCAGTGATAATTAATTCGCCAGT   | 10736 | A_95_P038806 BP129374     |
| 11212 | 132 | 77 | 975  | CATCCGTCATTCCGACAATTGAAATATGGATTACACCATGGACTTTTGATCTTGGTAG   | 10746 | A_95_P194787 TA15974_4097 |
| 11217 | 132 | 82 | 823  | TTTATTCTACACTTCCCAAGCTATGCAGCAAAGATTTTATGATCAGCCCATCCCTGGGG  | 10756 | A_95_P311348 FG147526     |
| 11218 | 132 | 83 | 649  | CAGGAAGACATTGCCTTCCCAAATGATCCACGAGTACCTATTAAGGTCGATGATGAT    | 10758 | A_95_P221997 FG174018     |
| 11226 | 133 | 6  | 791  | TCGATATGAGTATAGGTCTAGCAAGATATGCTATCCTTTTAGAAGCATTAACTTGACT   | 10773 | A_95_P212722 EB684210     |
| 11228 | 133 | 8  | 453  | TTCATGTAGAAAGAGACTAAACTATGCTGTCTCAGTCCGAATATTTTAAAGTTTTGTGGT | 10777 | A_95_P003666 FG637596     |

|       |     |    |      |                                                              |       |                           |
|-------|-----|----|------|--------------------------------------------------------------|-------|---------------------------|
| 11229 | 133 | 9  | 436  | GTGAGTTTTAGGTTACTACTATTAATAAGAGATCTTGACTCTAGTGATTTGGCTCCG`   | 10779 | A_95_P182502 TA13230_4097 |
| 11230 | 133 | 10 | 801  | GTTTAGTCTAGTGTGCTCTAATTCATTCTTTAACCCATCCTCCATTACATGACTC      | 10781 | A_95_P287718 EB451943     |
| 11236 | 133 | 16 | 768  | ACGTTTGGATTTAAATCTTGAAAGAGGACGCATTCGTGATGAGCTTGCCAATCAAAA`   | 10793 | A_95_P253134 EB426249     |
| 11237 | 133 | 17 | 833  | GGGATTAAGAAAAGCATACCCCTAAAGGTTTGGGAGATATCAGTTTGATTTGTAGT     | 10795 | A_95_P232664 DW000015     |
| 11241 | 133 | 21 | 363  | CGGTAGACATTGTCTGATGTTACTGTGTTGTACGTATTGCATATTAACCTATTTCTTCC  | 10803 | A_95_P159712 EH618158     |
| 11242 | 133 | 22 | 744  | TAGTGGATTGCATTTTGTGCTTTTAACTTGGTGGATTGTGGCTTGAATTTTAGCTG`    | 10805 | A_95_P027206 DV160701     |
| 11249 | 133 | 29 | 814  | CTTTTTCATCCTTGTGTGTAAAATGCACCTTGATGATTTAAGGGAATCCGTAAGTTACTC | 10819 | A_95_P193727 EB425276     |
| 11251 | 133 | 31 | 1178 | GTGTTAAATTAGTAACTTCTTTGTGTCCTTTTAAATTCAGACATCTTTGGAAGGCACTCT | 10823 | A_95_P103337 TA17132_4097 |
| 11257 | 133 | 37 | 1041 | CAAGGGTGTACCAGAGACGTCAAATGTAAAAGAAAATTACCAGTTTTGTTTCACAAA    | 10835 | A_95_P240219 AY141105     |
| 11258 | 133 | 38 | 330  | GTTACGCCTTTTCTTGGGTAGCATTATTTTTGTAGGATAACATAGTGTGCTTTTTG     | 10837 | A_95_P212827 TA19918_4097 |
| 11259 | 133 | 39 | 809  | AATTATGTCATGCACTCGACTTTAGCCGCATATTACCCTTAATGAAGCCTCTTTAGC    | 10839 | A_95_P119652 DV999112     |
| 11262 | 133 | 42 | 279  | ACGAGAGTTACTCCTGGTATTTCTACTTTTGAGTTGTACCATTACAATTATCATCCTA   | 10845 | A_95_P002036 FG642822     |
| 11265 | 133 | 45 | 902  | GTAAGTGCCGCTTTAGATTAATTGGAAGTTGAGTATAATAATCTGCTTCTCCTTTAG    | 10851 | A_95_P010626 TA12520_4097 |
| 11266 | 133 | 46 | 56   | GGCAGAATTGCCATCTCATCTGTACAACATTATTTGTTGAATTATCCTGTGTATACAT   | 10853 | A_95_P089048 BP530322     |
| 11268 | 133 | 48 | 558  | TTTGCATTATTGCAGCATAGACAACCTGCAGTCACTTTAAATATTGATTGGCGTTCTGA` | 10857 | A_95_P286058 FG634699     |
| 11271 | 133 | 51 | 866  | ATTCTGATGAGCTGCAGATTAGTTGAAATTACCGGCTCTACTTCAACATGCACCTTCT/  | 10862 | A_95_P304833 FG155267     |
| 11272 | 133 | 52 | 427  | GCACTATCAAATGTAATTGGAACATTGAGCATGAATGCAAAAAGAAAAGACCTGATT    | 10864 | A_95_P089318 BP530453     |
| 11274 | 133 | 54 | 821  | ATATCTTAAGGAGCTTCCACTGTCACTACATGCACTGGATTGATCACTGCGCTGCTA    | 10868 | A_95_P246967 FG157245     |
| 11278 | 133 | 58 | 809  | GATGAGCATCTTATTGGTGTAAACGAATATTGACAGCCATATGTACATGGCAGTTGTTC  | 10876 | A_95_P225177 EB445311     |
| 11279 | 133 | 59 | 281  | TTTGGGATCGATGTACAACAAGTTTGACGTTTCAGTATTGGAAGGAATGCTTTGTGT    | 10878 | A_95_P117542 DV160481     |
| 11280 | 133 | 60 | 0    | CAATTTATGTAGCATTGTTCCAGCCGGCCAAGGAGTTTTGAAGTTCCAAAGTTACGG    | 10880 | A_95_P021066 A_95_P021066 |
| 11282 | 133 | 62 | 130  | GCAGCAGGTTGTTGAGTAATGGTTAGTGACATATCCTATGCATAAATAGTGTATTG/    | 10884 | A_95_P118362 DV161393     |
| 11285 | 133 | 65 | 1468 | CATGGCTCAGTTTGATGTTACTTTGGTGAGCCAGCAGTCTTGTGCTTTGCAAGTTTGT   | 10890 | A_95_P222847 TA22121_4097 |
| 11286 | 133 | 66 | 589  | TTTTGGAAGTGGTGGTTGTTGGTTTCAAGTAATTGAAGAACTTACTTCTTGTACTC     | 10892 | A_95_P005936 TA11726_4097 |
| 11287 | 133 | 67 | 244  | TGCATGTTAAGGTAGGACCACGAGAATTAGAATTTGATTAGAAGTGTCTCTTATCAT    | 10894 | A_95_P134127 EB435986     |
| 11288 | 133 | 68 | 203  | GGAGATGTGAGTTCCAAATGCAAATTTTGAGTATACGACTGTGGTTTTCTAGTTTCTA   | 10896 | A_95_P115212 DQ460183     |
| 11290 | 133 | 70 | 164  | ACTTCGGTGATTCTTTCTATAATGGCCTTGGTGGAGTCTTGCCCGGTTTTAGGAGACT   | 10900 | A_95_P161952 EH620608     |
| 11293 | 133 | 73 | 1715 | ACACTTGTGACAGTGGATTATAACAGGAATTTCAAGAGCTGTTGCTGCTTGTGATT     | 10906 | A_95_P008816 TA12710_4097 |
| 11294 | 133 | 74 | 874  | GATATAGTTTGTATCTTCCCGTCAACGGCCAGAATACATTGCAATACCCTGAGTTCTC   | 10907 | A_95_P219172 TA21341_4097 |
| 11295 | 133 | 75 | 78   | CTTCGGGTCAGTTGATGACTTACAATTTGTTATTGGTATAGTTATTGATATGTGAGT    | 10909 | A_95_P257509 EH623795     |
| 11302 | 133 | 82 | 526  | AGTTATCATACTGTTATGTTAGTGCCAGAAATGCTATCCACACATGGTTCTACTGGA    | 10922 | A_95_P106217 FG200594     |
| 11305 | 133 | 85 | 863  | TCAAAAATCCACTTTACAGTGTAACTTTTACCTTGTTAATGCAGCTGATCCTTTCTGT   | 10928 | A_95_P184992 TA13817_4097 |
| 11307 | 134 | 2  | 490  | TCATTGTCTCCTATTGGTAAATCACCTGCTTCAAGTATCGGATCGAAAGAGCAAAAGC   | 10766 | A_95_P122652 EH618914     |
| 11309 | 134 | 4  | 483  | TGTTCCCTATCCATCCCATTCTTGCTTTGAACTTTGAGTTGTATATGAAATGTCTAACA  | 10770 | A_95_P285673 FG643284     |

|       |     |    |      |                                                             |       |                           |
|-------|-----|----|------|-------------------------------------------------------------|-------|---------------------------|
| 11312 | 134 | 7  | 419  | CACAGTGCTGCCTCTGTTGAGTTTGTCTTGTCTTGGTGATTTATCTGATGTTTGTGC   | 10776 | A_95_P056146 BP133884     |
| 11321 | 134 | 16 | 777  | TGGCTGCTCTTGTGCACATGACAGATGAAGATCTTAAAGCTATGGGAATACCAATGG   | 10794 | A_95_P205167 EB438545     |
| 11322 | 134 | 17 | 566  | AACGAAAGATGAAAAACCATGACTGGGGCAGTTAAGGCTTGAAGAAGAATGACCA     | 10796 | A_95_P020261 EH622432     |
| 11323 | 134 | 18 | 463  | AAGGTCCTTGACACAGAACAAGAATCATGTAATATCTATTCCGCGGATGATGTAAA    | 10798 | A_95_P141237 EB445013     |
| 11324 | 134 | 19 | 357  | GGCTGTGTCGGATTGGACTTCCGCATTGTTATCGATATTTCCGCTATTTAGTATTGT   | 10800 | A_95_P004606 EH621994     |
| 11327 | 134 | 22 | 704  | ATGGCAACTCATCAAACACATACAAGGCATGCACGTAACGTCTAATTTCAATTCATT   | 10806 | A_95_P299308 FG187855     |
| 11328 | 134 | 23 | 176  | TTCATCCTAAGAGAAAAGAGAAACAGCCACCCATCTCTAACCTCACTCAAAAATCAAA  | 10808 | A_95_P168486 EH664439     |
| 11330 | 134 | 25 | 889  | CCTTTGCTGTAATGAGATAGTAATTGTTTACCGTGAAATATGGATGTTTCTTTAGCT   | 10812 | A_95_P264681 EB678751     |
| 11336 | 134 | 31 | 367  | CTTGGAAACGATACATCAGTGGGAGTCTTTCATCCAGTTGTTGGAATGTTGGAGAG    | 10824 | A_95_P092858 BP532022     |
| 11337 | 134 | 32 | 566  | ATGATAGATTGCTATTGGAACCATGCTAAAGTGCCTGCGCTGAGTAGTTTCTTTGA    | 10826 | A_95_P063050 BP135675     |
| 11340 | 134 | 35 | 0    | CAGAAAGTTTAAAATATAATACAAGGCTCAGGCCTTCACCGTCAGCATCACCAATGA   | 10832 | A_95_P302438 A_95_P302438 |
| 11347 | 134 | 42 | 413  | TTCTGCCGTTGAGAATTATTGCTCTTAGATAGTGTGACTGTACTTTGCGTTCTTAATTA | 10846 | A_95_P121712 DW001818     |
| 11354 | 134 | 49 | 789  | CTATTTCTTCGGTGGAGTGAGCACCACAAAAACTAGCCAATTTTATAAGGTTATTTT   | 10859 | A_95_P138142 EB441880     |
| 11358 | 134 | 53 | 415  | GAACCAGCTCGATTAGCCACTAGTATACTTGAGAAATTCAGTTTACTCAAAAGACAAT  | 10867 | A_95_P001256 FG638255     |
| 11363 | 134 | 58 | 551  | GATGGAGATTAACAGACCCTGCATTATTTCTTGAATCATGTAATGACTTCCTACTGTT  | 10877 | A_95_P197597 TA16598_4097 |
| 11373 | 134 | 68 | 476  | TGTCCAACCTACGTGCTCCTGCTAATGAAAATCTGATGGAACCTTGATAATGATT     | 10897 | A_95_P137847 FG169100     |
| 11375 | 134 | 70 | 605  | CAACTGTAAGTCGTACATGAACAGTTTGTGACTAGTTACACATTTCCAGAAGATTAT   | 10901 | A_95_P122622 DW002611     |
| 11380 | 134 | 75 | 782  | GTGCTTTTGGTGCTAGTGGGAGTAGATAAGGCACTTGATTTGCGGCCTAATGTGAAA   | 10910 | A_95_P208657 EH620836     |
| 11381 | 134 | 76 | 315  | TGCCTTTTATTAACCTCCGGGTTCTGATATGATCAGTTTATGGGGCTGGTGGACAGAT  | 10912 | A_95_P103077 CV016329     |
| 11382 | 134 | 77 | 392  | TGAGTTGTTTATTTAGTAGCATTGTAAGATTGTAGGATAGTCATGGGTGCCCTGTCT   | 10913 | A_95_P062155 BP135442     |
| 11387 | 134 | 82 | 761  | AGCCTTAAGCAGAGGTCTCGAGCTAATAATTGAAAATGGTTGGAATGATGCGTGCC    | 10923 | A_95_P126577 EB425895     |
| 11397 | 135 | 7  | 755  | GCCTCTTGTTCATTTTTTCGTACACCTGTATAGAGACTTAAATCAATTCAGAGTTCAGA | 10942 | A_95_P192722 TA15516_4097 |
| 11398 | 135 | 8  | 739  | GATATGTGGATACCTCTTGGTTCCATCAGTAGAAATAAAGGCAAAATACATACTTTTA  | 10944 | A_95_P179137 TA12435_4097 |
| 11399 | 135 | 9  | 842  | TGGGAGTATTATATGTCTCCACAGCTAAGCTTGCAATTTGTAGTGATAACCCTCTCTC  | 10946 | A_95_P210867 EB425346     |
| 11400 | 135 | 10 | 555  | TCCTCTTAGAAAAAGGCATTTGTATGCAATAGTAGAATGAATATGCAGTTTTGAGAC   | 10948 | A_95_P205267 TA18242_4097 |
| 11402 | 135 | 12 | 765  | GCAGACGACCTTATCTGCGTTTGAATTTAAGCCATTTGGAAACAATTACTACTATGT   | 10952 | A_95_P142727 EB446140     |
| 11413 | 135 | 23 | 1221 | GCACTGAACGTCTGAGATCTGTTATTGTACTATTTAGGTCTTTCTTTATTGTAGGTGA  | 10972 | A_95_P009721 TA12692_4097 |
| 11414 | 135 | 24 | 513  | AGTGGTTAAGTACTGCTGGAAGTAACGTTCCCATCACTATGACCAACTTCTCTGGTAC  | 10974 | A_95_P207567 BP530590     |
| 11416 | 135 | 26 | 1664 | GGCTCCATGAGATGTGCCAATTTGACCAGAATGAATATTAAGCTATAACAACATTCA   | 10978 | A_95_P011846 TA14346_4097 |
| 11417 | 135 | 27 | 671  | TTGCACAATATGTTGTGCTTTGGTGAGGTTTATAGGTCTAAATGACAGGGCCTATTTA  | 10980 | A_95_P163147 EH622114     |
| 11418 | 135 | 28 | 1622 | CCCCATGTTATTTTGTCTAAATAAAGGGCGAGTATATCAGTTATAGACAGCTATCCT   | 10982 | A_95_P110607 Z48977       |
| 11420 | 135 | 30 | 465  | ACCAATTGGCGAAAATTGACATGTACGTAGCAGCTGCTGGTATCAACCACAAAGAGT   | 10986 | A_95_P053741 BP133263     |
| 11421 | 135 | 31 | 468  | CTTATAGTGGCGAGTATAAGCTTCTAACTTGTCCGATTTATGGAAGGGTAATGGGA    | 10988 | A_95_P110992 TA13525_4097 |
| 11425 | 135 | 35 | 495  | CATGGAGAATGAACAATACCAGTATGCCTTAGTGCTATACCTGCATTTTATGCCAAT   | 10996 | A_95_P028661 DW003697     |

|       |     |    |      |                                                             |       |              |              |
|-------|-----|----|------|-------------------------------------------------------------|-------|--------------|--------------|
| 11426 | 135 | 36 | 899  | CAGGTATTCTTTGTACAGTTGAACTGCTGCATTTTCAGTCCACTTACTTGTCTTTGTT  | 10998 | A_95_P200322 | EB430285     |
| 11433 | 135 | 43 | 782  | TTGAATTCCTTTCCACCAGAGGAATCTCAAGCATTTGTGTTCTCAAGCCAGAAGAGE   | 11012 | A_95_P200627 | EH622710     |
| 11435 | 135 | 45 | 647  | TCATGTGACTTTCTCTCTCTGACAGTTGATTTGGAGGAGCAAAGATACGTCAGTGC    | 11016 | A_95_P135217 | EB680885     |
| 11437 | 135 | 47 | 416  | GCACGTATGTCACATGTATAAGTTTTTCATGTCATGTCAGGTTGTCCAATATTTAGTAT | 11020 | A_95_P090368 | BP530926     |
| 11440 | 135 | 50 | 747  | GCAATTCATGCTTGCCATGTAGCTAGGATTTACATGTAATAGATTTTGAATAAGAGTC  | 11026 | A_95_P010281 | TA14530_4097 |
| 11442 | 135 | 52 | 294  | AGTCAGAGCGCTTAATACTTTATCTACAACCTTGAATGTAATACACTAGACTTTATAC  | 11030 | A_95_P201237 | TA17380_4097 |
| 11444 | 135 | 54 | 725  | ATGTCAAGCGTGCTCCATACTCATGGGAAGATGCTTCTATTTGACACGAAGGTCTCT   | 11034 | A_95_P262041 | EH619270     |
| 11445 | 135 | 55 | 708  | GTTTCCTTCTTTCTATTCGGTGTATGTTTTTCGATTCTACCAAGTTATGAGACCTAAT  | 11036 | A_95_P000226 | EB438050     |
| 11449 | 135 | 59 | 1073 | GCCTTTACTGCAAGTATTATAGTATTCCATTCCTATATGCTTACACTAGTCACAAGCAA | 11044 | A_95_P211272 | TA19574_4097 |
| 11453 | 135 | 63 | 259  | GTTTATGTAAGTCAATTCGTTGTTATCGGGATGTAGGAACAGTTCTAATGAGCTTAAC  | 11052 | A_95_P091868 | BP531535     |
| 11456 | 135 | 66 | 499  | TCATGTATCAAACTTTTTTCATCTCATGTCCTTTTGATATGGTTTCTACCCGCGGCAGG | 11058 | A_95_P202657 | TA17682_4097 |
| 11458 | 135 | 68 | 846  | TAAGGTGCCGAAGGACAATTGATAATGGACAATCTATAATGTCTGAAGTTTTGGCAG   | 11062 | A_95_P020251 | EB425529     |
| 11460 | 135 | 70 | 916  | CCAACATTTTATGCGTTTTAGGTGGTCTGGACCTTCTGGTAATCTTGATTTATGATA   | 11066 | A_95_P215697 | TA20545_4097 |
| 11461 | 135 | 71 | 636  | GGACCCCTGTAAACATTGGAGTTTAAAGTGGTTTTCTTTTATGTTGAATGTTATGATC  | 11068 | A_95_P021481 | TA16412_4097 |
| 11463 | 135 | 73 | 875  | ATTCCTTAGCTATCAAGTCGGGGGAAAGGCAGAGCAGGATATAGAAGCTTGTGAA     | 11072 | A_95_P296628 | EB680438     |
| 11464 | 135 | 74 | 614  | TTCCGCTGTTTCTTTGGGCTGTATATTTAAGTAAGTTGTTTCGGTCACTTGTAATTC   | 11074 | A_95_P310153 | FG135369     |
| 11469 | 135 | 79 | 441  | TCATTGGAAGAGCTGTGGTTGTTTCATGCTGATCCTGATGATCTGGAAAGGGTATCA   | 11083 | A_95_P160342 | EH619039     |
| 11472 | 135 | 82 | 464  | TTGCAATGAGATACCTGTGGGTATCATTAGTCCTTCTAGGTGATCTGTTGAGCAGC    | 11089 | A_95_P077480 | BP527257     |
| 11474 | 135 | 84 | 793  | GATCCAATTCGTGATTGTGATAAGTGAACCGCAAGTTCCTGTATCTGTAGCTTGTAC   | 11093 | A_95_P163517 | EH622562     |
| 11479 | 136 | 4  | 613  | CTCATATTGTGCTTGTCTGTCTGTACGGAACGATTTAATGAGCATCTAATTTCTCTGTT | 10937 | A_95_P019631 | TA16064_4097 |
| 11480 | 136 | 5  | 799  | TGTCCAAGTACTGCAATTTGTGTGACCTAAATGAGTTGTAAGTGGACATTGCGGAC    | 10939 | A_95_P016646 | DW002460     |
| 11483 | 136 | 8  | 1880 | GTTTCGTTTGCTGAGATAGGAGATAATTACAAGCAAATGATGTGGATATATTCTGCAT  | 10945 | A_95_P221482 | TA21828_4097 |
| 11484 | 136 | 9  | 129  | CTGGTTTGTGGTGGTGGTGTGCTGCTTCTTTGTTTTCAAATTTAATGTTTTTTGG     | 10947 | A_95_P147262 | FS437774     |
| 11492 | 136 | 17 | 695  | CTGGTAATGGTTTCATTTCTTTGCTCTTCCCAATTGTAAGAATGACTTGTAAGGATG   | 10962 | A_95_P194947 | EB446333     |
| 11493 | 136 | 18 | 637  | ATGGATTTGTATTGTGCACTTGTGCAACAATAGATTTTGGCATGACACATGCTTACT   | 10964 | A_95_P300603 | FG644499     |
| 11494 | 136 | 19 | 842  | TCTCTTTGGTGTCCGGTAGAAGAGTGGTGTATTGCTGTTTCTCTGGAAATGTCCTT    | 10966 | A_95_P230764 | EB677730     |
| 11497 | 136 | 22 | 531  | CGTGTGAGCTCTGTAGAGGCAAGATATTATTTTACCTTATAATGGGTGCTTGAGTA    | 10971 | A_95_P122052 | DW002106     |
| 11498 | 136 | 23 | 978  | CCTGAACTTGATACGAGCTCTCATATCTATCTCAATAATATCTTAAATGCTGTGGTTA  | 10973 | A_95_P185392 | TA13902_4097 |
| 11499 | 136 | 24 | 560  | GTCAAAGCTAATCCTCAAGATGTTGAGAATGCTACGTGGATGTTGACTGTATTCAAC   | 10975 | A_95_P051691 | BP132720     |
| 11502 | 136 | 27 | 881  | ATTCTCTACAATCGAGCGCTGCAGACTATATGGTGGTGCATATGACAGCGAATTGCA   | 10981 | A_95_P294168 | FG163876     |
| 11505 | 136 | 30 | 1714 | GTTGGTGGTGTGATATGATATTGTAGTAAGTTAGAACCATTTGCTTTTTGGTGTATGC  | 10987 | A_95_P007486 | D45204       |
| 11506 | 136 | 31 | 801  | GATGGCATCATAGTCTGTTACAACTCAGTAATGCAATAACACTCTGTTAAGAACA     | 10989 | A_95_P010871 | TA12762_4097 |
| 11512 | 136 | 37 | 716  | CAGTTTCTACTACCTGGTCCATATGTTTTCTTCTTTGATCAGTAAATGGTAGTACATAG | 11001 | A_95_P231369 | EB451089     |
| 11514 | 136 | 39 | 778  | GTCCTGCAAGGTTTGTCTTGTGCTGTTGAGGTATGTAGCTCAGTTAGACAATGTAAT   | 11005 | A_95_P118022 | DV161036     |



|       |     |    |      |                                                              |       |              |              |
|-------|-----|----|------|--------------------------------------------------------------|-------|--------------|--------------|
| 11517 | 136 | 42 | 1353 | TTGCGGCTTTATAATCGTTTTTGGCATCCAGTTGATGATTCTACAACAGCCAAATCATC  | 11011 | A_95_P238959 | AB084124     |
| 11520 | 136 | 45 | 582  | GTTTGGTGATACTTGAGACTTAGCCTTACATGGGAATTACTTGTCTATGCTGTAATT/   | 11017 | A_95_P246437 | EH617143     |
| 11522 | 136 | 47 | 863  | GGTTGACGAATGCCTTGCTCCATCTTATGCATGAGAAAGTCTTTGTTTCAGTATATGGA  | 11021 | A_95_P217742 | EB678124     |
| 11523 | 136 | 48 | 398  | GTTGAATGTGAAACAGAATAAACCATGCTTTTCGTCATGGACTAATAAATATGTTCT    | 11023 | A_95_P000916 | TA13631_4097 |
| 11524 | 136 | 49 | 684  | CTCCATTAGTTCAGTAACTGAGCCTGGCTTGTTGTGCGTGACTGACTTTTCTTCATTC   | 11025 | A_95_P267916 | DV162718     |
| 11526 | 136 | 51 | 485  | TTATAAAGCCCCAGTGGTTTGTCAACTGCAAAAGTATGGCCAAACAGTATCCAGAGC    | 11029 | A_95_P058101 | BP134388     |
| 11530 | 136 | 55 | 276  | AATGATGTAAAAGAATCGTGGGAAGATGAAGAGGAGCCTGTTCCGGCACCTAAACC     | 11037 | A_95_P164802 | EB426099     |
| 11536 | 136 | 61 | 382  | ATGGATTCTGGTCCAGTATCAACCTTCCAGGTTACATAGCTTTGGTCTCAAATATTC/   | 11049 | A_95_P043896 | BP130739     |
| 11540 | 136 | 65 | 174  | TTCCATCTGTAGTTTTGATGTGACATTTTGGCCGTTTAGCCTTGGAAATGTTATACCTG  | 11057 | A_95_P104062 | CV016826     |
| 11541 | 136 | 66 | 381  | TTTCTATTTTCGCCAAAAGAGCATAAATCTGAGTTGGGAGAGTTTGGGTGGGGTTG     | 11059 | A_95_P001311 | BP526377     |
| 11545 | 136 | 70 | 824  | ATTGTGGTAACAAATGTTGTCCGGTCTGGGTGCTGCTGTTCTTGGTGATCGATTTCT    | 11067 | A_95_P157782 | EH615815     |
| 11550 | 136 | 75 | 752  | GATCTGTATTGTAATTGCCTTCTGGGCCATTTTAACTAGTGTACGTGAATAACA.      | 11076 | A_95_P013506 | DW004694     |
| 11551 | 136 | 76 | 522  | ATGGGGCTACTGGTTGGAGCAAATCTCATCTAAGAAATTCGCTTTCTAAAAAGAGAAT   | 11078 | A_95_P107052 | CV018189     |
| 11552 | 136 | 77 | 1242 | AAAGAAGAGAATCACAACTGCTGAACGGAAATTTCTGGAGATCCTGCAGAATGGAG     | 11080 | A_95_P194607 | TA15932_4097 |
| 11555 | 136 | 80 | 829  | TCTACGTTAAACAGGCTATTCAAGAATTCAGCAGCAAAGAATGGCATCTTCTGCGCT    | 11086 | A_95_P025751 | EB447103     |
| 11562 | 137 | 2  | 562  | AGTGAAGTTTTGTTGCTTGACAACCTTTGGCCTTTTTGGTGAATATATATGGCTTGATG. | 11099 | A_95_P248392 | EB682951     |
| 11565 | 137 | 5  | 286  | TACATCAACTCTACGGCAGTGTACACAGAGGGGTGAAATATAGAATTTCTTTACTTC    | 11105 | A_95_P027966 | EB446714     |
| 11566 | 137 | 6  | 594  | GTGGCATCCCTTACTTTCAATGTTTTGATGTGAGTTTTACATTTTAGCTTTGAGTGTTC  | 11107 | A_95_P149627 | TA12981_4097 |
| 11567 | 137 | 7  | 688  | CTATTTTCATGCTTGCATCAATTGAAATCTGGAATCTGAACACCAGGAATAATGG      | 11109 | A_95_P140502 | EB444403     |
| 11571 | 137 | 11 | 850  | GAAAAAGAAACGAACATTTGTGCTCCGTAAGGATGGGTTACCGGATGCAGTTGTGT     | 11117 | A_95_P198412 | DW000157     |
| 11581 | 137 | 21 | 500  | GTGACAAGAAGAATTTCTGGTACAGGAACAGGTATAGGTTTAGACAAATAGGTTTCT    | 11136 | A_95_P073655 | BP526268     |
| 11587 | 137 | 27 | 935  | AAAGAGTATGGGCTAATCGATGGTGTGATCTTGAACCCCATGAAAGCCCTTCAACCA/   | 11148 | A_95_P016141 | TA14085_4097 |
| 11591 | 137 | 31 | 615  | CCAAGTTTAATTTGTTGCCGGGGTTTGACGTGTGTTGTAACAAGTTAAAGGTTTTCC    | 11156 | A_95_P119617 | DV999065     |
| 11605 | 137 | 45 | 271  | GTCTCAACATTAACCACAAGACATCTCAAAGTAACATTGGAACCAACCCTGAAAAG/    | 11184 | A_95_P094833 | FG639902     |
| 11613 | 137 | 53 | 403  | ATATCAGCTAATTTGCCTTACAAAGTGGAGATTCGTGGTGGCAAATTTGGAAGGGCC    | 11200 | A_95_P113722 | EB681361     |
| 11618 | 137 | 58 | 916  | CGAAAGGAGACTCTCACGAGGTTGACTCCATAAGTAGTACCAGTGGTTTTGATCAT.    | 11210 | A_95_P233024 | EB677877     |
| 11623 | 137 | 63 | 384  | AGCATGTTGTAGTTGGTATATACTCGTAATGCCATATAATGTCCAGTAGATTGACTT    | 11219 | A_95_P214962 | TA20379_4097 |
| 11624 | 137 | 64 | 730  | GAAAAGAAATCTGTTAACGTCGATGAGCAATGACAGAACGTCGTTAGAGGACTAAA     | 11221 | A_95_P145907 | EB449668     |
| 11626 | 137 | 66 | 730  | CACAGCAGCAAGAATGAATCCATCTGCCAAAATGCAAAATATAAGCTATTATGTAGT/   | 11225 | A_95_P149372 | EB679208     |
| 11635 | 137 | 75 | 1958 | GATGTATCAGTGTCTCATTGTGACCCATACTTGGAAATCCTCTTGATTATCATTAT     | 11242 | A_95_P007341 | AY578144     |
| 11641 | 137 | 81 | 627  | AATGTCATGTCATTCTCGTTAAGTATTGTGTTAGCTACATTTTTATCTGTTGCCCTGTG  | 11254 | A_95_P182992 | TA13352_4097 |
| 11646 | 138 | 1  | 640  | GTCCCAGTGGTTTACGTACTGTTTTGTGAAATTACCTTCTTATCTATTTTGAAGACAA   | 11098 | A_95_P206607 | DV157653     |
| 11654 | 138 | 9  | 473  | TCTTGCTCCAGAGTCTTGGAAAGACAGTAAGTACTGATTTTGAATTCCTACGCCAA/    | 11114 | A_95_P079070 | BP527676     |
| 11658 | 138 | 13 | 1186 | TTGAGACGTGGCCTGTGCATCTACTGGTGTGTCAGAACTACACAAAGATATAGT       | 11122 | A_95_P204012 | TA17975_4097 |

|       |     |    |      |                                                              |       |                           |
|-------|-----|----|------|--------------------------------------------------------------|-------|---------------------------|
| 11661 | 138 | 16 | 962  | CAAATTTTGTCAATTGTTAAAGCACGAGGGAAGAGGTGTCCCTTCTTCGCTTAGTTTT   | 11127 | A_95_P195207 X60059       |
| 11665 | 138 | 20 | 904  | GCAGATTGTTTCATCTTTGCTAGTATGATTACGAGTGAAAGCTCTTAATGCAATCTTA   | 11135 | A_95_P021531 TA16260_4097 |
| 11667 | 138 | 22 | 382  | TGCGATGTCAGATTTTAAAATCCCATTATAAAGGGATTTGATGAATGCAAATCACCTT   | 11139 | A_95_P182062 TA13124_4097 |
| 11668 | 138 | 23 | 407  | GTATGATATAAATAGTGGTTCACCTATGCACAGTAGCCTGCATTTGGTGGATCTTGCC   | 11141 | A_95_P238569 AB053097     |
| 11681 | 138 | 36 | 418  | ACACGCTCTGTATTTTCTGCCATTGCTTTGCCCTTCTGTTGTTTTATGTAAACAAGA/   | 11167 | A_95_P122862 DW002807     |
| 11686 | 138 | 41 | 382  | CCTAAGCGATATCACTTGGGTACAATGTTTGTCTTTAATTTATTGAACGGATGTGCA    | 11177 | A_95_P026806 TA21992_4097 |
| 11688 | 138 | 43 | 278  | CCGCCCCAAATAGTTTGGATAAAGAAAGCTTGTGATATATTAGTAGTTATATCCTTC    | 11181 | A_95_P114612 CV021687     |
| 11695 | 138 | 50 | 496  | GGAGCCCTACTCTTCATCATGCTTCCCTTTTTTATTGTTGGAAAATATAATGAAAGTC   | 11195 | A_95_P062730 BP135589     |
| 11696 | 138 | 51 | 743  | TATTTGGGGCCTTTGATTTGATACGGCACAAAAGATACCAGCGATATGCAAGAAAAAT   | 11197 | A_95_P313563 FG158379     |
| 11705 | 138 | 60 | 798  | GGATGTATGTTTTCTCGCTTTGTGTTAATTCTTACAAGAATAAAGATTTGGGTTCTC    | 11214 | A_95_P270111 EB677791     |
| 11709 | 138 | 64 | 392  | TGAGTTCTTAGCTTTATTTTGTAGGAACATATGGACTGAGCTTAATAGTATGTTGTC    | 11222 | A_95_P039801 BP129657     |
| 11712 | 138 | 67 | 382  | TCCATATCTAGTATAGTAGCAGCTTACACATCAGCTTCATTTCTTCTATGAATAGAAG/  | 11228 | A_95_P098893 BP534687     |
| 11716 | 138 | 71 | 104  | ATATGTAACACAAACTTCGGAGACTCATGGCCTCCCTAAAATTGAAGAGGTCCTGCC/   | 11235 | A_95_P067590 BP136916     |
| 11719 | 138 | 74 | 178  | TTTCTTGGATTGTAAGGTTACAGCTTTGGGACTTGTGTCAGCTCTTTCCTTGTTC      | 11241 | A_95_P154377 EG649559     |
| 11724 | 138 | 79 | 353  | AATCTGGGGTAAAGGTTACCATACCACGTTCCATAGCGCATCGGATCTAACCCTATC    | 11251 | A_95_P113872 CV021352     |
| 11725 | 138 | 80 | 675  | GTAATTTTAGTTTGTGATAAAATCTGGTTCCTTCTCTGTTCTGGCGGTTTTGTACCA    | 11253 | A_95_P120137 DV999876     |
| 11729 | 138 | 84 | 1780 | GCTACTGGTGACTAGAACATAATAAATGTATGTCAAGTTTTCTGGAGGTATACATGT/   | 11261 | A_95_P010596 TA14042_4097 |
| 11732 | 139 | 2  | 144  | GTAATGCTCGGTTAAGAAAACGAAGGCCCTAGTGATCTGGGTACAAAACAAAGCC`     | 11266 | A_95_P041946 BP130228     |
| 11738 | 139 | 8  | 855  | TATTTGCATGACCAACAAGATTTGTCTCCTGCATGGCTGAGTGAGCAGCTTGAAGTC    | 11277 | A_95_P311133 FG164937     |
| 11739 | 139 | 9  | 771  | GACAAACAGCAGGTAGGTATAACTTCAGAAAACAAAGTTTTCTTAGTCTTGCTGTTGT   | 11279 | A_95_P294128 EB439747     |
| 11744 | 139 | 14 | 921  | GATGTGTCAAAGGCTTTTCTACTGTCGTTGTGAATCTATTGTGCATGCAGTTAACTTAA/ | 11289 | A_95_P181947 AB079023     |
| 11753 | 139 | 23 | 60   | GAATCCAAGAAGTCTTGAAATCGTTATGTCTCCCATGCCACATTTTTGAAAGAAATA    | 11307 | A_95_P004066 EB643438     |
| 11754 | 139 | 24 | 1087 | GTGCACTTTTGTTCTCCAACCTGATGTTGTGAGTACCTGGCATTCTCAGCAATCTGG    | 11309 | A_95_P213957 TA20158_4097 |
| 11755 | 139 | 25 | 1402 | ACTCGAGTATTAACATCTACCGAATTTGGGGAAATACAGAATTTTGTAGTCAGAATTT   | 11311 | A_95_P007492 TA13337_4097 |
| 11759 | 139 | 29 | 691  | TATTTCAAATCTGGTGAGGGTGTAGAAAGTGTAGATCATGTTGCTCCATCTGAGAA     | 11319 | A_95_P142612 DV159622     |
| 11766 | 139 | 36 | 426  | TAAATTTTCTTCGATTGTAACATAATTGGCTTTCCCGTCCAAAATCCACGTCA        | 11333 | A_95_P082115 BP528435     |
| 11767 | 139 | 37 | 530  | GGTTGAAGTTGGGAGCACGCCATATAACAGAGGAATACATTCAGTCTTTTCATTTCT/   | 11335 | A_95_P160317 EH619013     |
| 11771 | 139 | 41 | 672  | AAGCTATGCAGGACGCTGCTGATGCTGCAAAAAGTGCAATGGTTAGTATAATTGGAC    | 11343 | A_95_P138912 EB442625     |
| 11776 | 139 | 46 | 963  | CGTTATATGATGTATACGGATTATGATTTTGTATCCATCGATCCATCATAATGGAACGT  | 11353 | A_95_P202907 TA17741_4097 |
| 11777 | 139 | 47 | 105  | GCCTGCTGTCAACCCCTTTTTGTTATATCTTCATGTATATAGCTCGATAATATTTGTGT/ | 11355 | A_95_P102177 CV015906     |
| 11781 | 139 | 51 | 442  | TGGTTCAAAGCTGGATCTCAAATTTAAGCGAGGGTGGACTTGACTACTTGGGCAATC    | 11362 | A_95_P104037 CV016814     |
| 11783 | 139 | 53 | 282  | TTCATGCAAATTGTAGCTTCTCAGATGTTAAGCCTATGATGGATATGATAGATGGG/    | 11366 | A_95_P111792 CV020374     |
| 11784 | 139 | 54 | 356  | CCCCCTTACCTTAATTACCCAAATACTTCAAAGCATTATGCACTACTTTTCTTAGGTT   | 11368 | A_95_P028676 BP533879     |
| 11785 | 139 | 55 | 724  | GGACAGTGGAACATGTGACATTGTTATTTTCTTCTGAAATGAGAGTTCATTAAC       | 11370 | A_95_P215772 TA20561_4097 |

|       |     |    |      |                                                              |       |                           |
|-------|-----|----|------|--------------------------------------------------------------|-------|---------------------------|
| 11787 | 139 | 57 | 2369 | CACACAAGATGTTGTAAGTTGTTGTTGGACATCGCTAATGTCTATTTGCCTTCTAAAA   | 11374 | A_95_P239319 AF435452     |
| 11792 | 139 | 62 | 739  | TTGTCTTCTCGGATCCCTACAAAGTGTCAATATAATCGCTGTACATCTCCTTATCTA    | 11384 | A_95_P137702 EB428815     |
| 11794 | 139 | 64 | 740  | GGCTGCAAATTTAGCCAGTGTGGCTCCGCTGATTAATTATGGATTGGTTTTGTTGCC    | 11388 | A_95_P214672 EB678917     |
| 11795 | 139 | 65 | 1256 | ATTGGCCCCGAATCACTTAAATGTACTTCCCTTGCAACTCAATAAAGTGATACTCATA   | 11390 | A_95_P159537 TA17140_4097 |
| 11797 | 139 | 67 | 681  | TGAAATCTGTTGGGAAGCTCTAACGATGAGTTGCACAAGTTTCTCCCAATGGAAC/     | 11394 | A_95_P063635 BP135833     |
| 11801 | 139 | 71 | 959  | GCTAATGGGTATTGATCTCCTATTTCTGTAAATGTTACTTTGTTGATGTAGTGTCT     | 11399 | A_95_P196102 TA16265_4097 |
| 11803 | 139 | 73 | 769  | TCCCTCAGGAATAATTGTGATTGATCTGCTTTCTCCTTGTACAGCAATAGTCTGATC    | 11403 | A_95_P273826 EH623341     |
| 11807 | 139 | 77 | 678  | GTTTTGAAACCGGTGGGAAAACCTTATCTATGGATGTGGCAACTTTTGGCAGAACT/    | 11411 | A_95_P120442 DW000357     |
| 11810 | 139 | 80 | 341  | TTGGAGGGTCTGCTTTTCTACTTGCATTCTATTTTGACAAAAGCGTATGACGTTTTA    | 11417 | A_95_P127007 EB426424     |
| 11819 | 140 | 4  | 747  | GCATATCCATAATGCTTTGCTTACTCTGAAATCATTGTAGCACTATTTTCTTCAAGCA   | 11270 | A_95_P214527 DV158255     |
| 11824 | 140 | 9  | 287  | GCATCGGCCCCCTGCCATTTTGTAAATTTTGTAACTGGGATCTTCTCACATTCCTTT    | 11280 | A_95_P088488 BP530091     |
| 11826 | 140 | 11 | 660  | GTTGTTTACCTGCTTCTTGTATTTCTGTTATCATGTACCGGACATAGTCATTATAATGTG | 11284 | A_95_P125387 DW005177     |
| 11828 | 140 | 13 | 89   | GGTGA CTCTGATGGAACTGGAGGAATTAGATAAATTGAGAAGATGTGGATTTTAGT    | 11288 | A_95_P106807 CV018069     |
| 11832 | 140 | 17 | 0    | TCACGCCAGCGGAAATAGATGATTACCTACAGAGTGATAGATTTTCTTTTCGCTTCGC   | 11296 | A_95_P297133 A_95_P297133 |
| 11840 | 140 | 25 | 428  | GTGCATTAATTATAGTTACGCTTATGAGTCGCCGTTGCCGTAGGCAGACATGTAGT/    | 11312 | A_95_P181212 TA12925_4097 |
| 11842 | 140 | 27 | 0    | AGGTCTCTTTACAACGTTCTGAAAGCATATTCTGTCTTTGACCGAGATGTTGGATACG   | 11316 | A_95_P297758 A_95_P297758 |
| 11845 | 140 | 30 | 728  | CCTTTTGTCTCACTGACCAAGTGCATAAACATCAGGAGGCAGAAGAGTTAGTAACT/    | 11322 | A_95_P263961 EB449438     |
| 11847 | 140 | 32 | 263  | GGATTCGATCCCGTTTGGTTGATGGAACATATTAGATTTGATTTTGTTC AAGATGA    | 11326 | A_95_P092863 BP532023     |
| 11848 | 140 | 33 | 442  | TCCCGTCGTAAGGGCTTATGTGTGACACTATGGAGTGATAGGAAATAATAATTGTTA    | 11328 | A_95_P196312 FG622275     |
| 11849 | 140 | 34 | 489  | TTGAAGTTTTCTCTGTGGCTGTAAAACACGCGTTGTTCAAGAATCAATATCATCTTGA   | 11330 | A_95_P020391 FG644307     |
| 11854 | 140 | 39 | 496  | TTAAGAGAGGACAAGCAGTTTAGAAGGGACTACCTGGTGCATCTACAATTTCAACA     | 11340 | A_95_P239819 AJ496227     |
| 11855 | 140 | 40 | 395  | CTGATGATTCTCAAAGTCACTCTGCCACAACCTTTGCAAGTATATTTGCTTTCTCT     | 11342 | A_95_P159937 EH618507     |
| 11869 | 140 | 54 | 236  | GGGCTATTTGGGGAATTAGGCTTAGGATTATCTGGTAAATTTGGGAACTAGTTTTCT    | 11369 | A_95_P002226 AJ718017     |
| 11870 | 140 | 55 | 238  | TACTTGCTCCAGGAATTGCAATAGCACATTGTTATATAAGGCTGCCAAGAGTTTTTT    | 11371 | A_95_P099513 BP534956     |
| 11875 | 140 | 60 | 854  | AGGTTTCTGTGGAAAAGTAAAAGACGACCTGCTAAAAAAGTTATGGTTGTAAGTGCC    | 11381 | A_95_P246952 EB426347     |
| 11882 | 140 | 67 | 234  | GGGTCTAAATACGGCTCCTACAAGTTTGAATTCATTGTATCTGATATATTGTTGAAC    | 11395 | A_95_P027176 CV016731     |
| 11884 | 140 | 69 | 517  | ATTCTCCCTATTACTGTATGGTGGTGGATTATAACTGAAAGGTCACTTTTTTGGGTT(   | 11397 | A_95_P027666 TA17147_4097 |
| 11889 | 140 | 74 | 876  | CCAGATTATTTGTGTTAGTCAGCTTCTTCTATGGATATGAAGATGAGTACGGTATG     | 11406 | A_95_P203357 TA17837_4097 |
| 11891 | 140 | 76 | 755  | CCCGTCACTAGAGTGAAGATTGAGCTCGATGATGTACTTTCCACCAATGTGTAA/      | 11410 | A_95_P164757 EH624061     |
| 11892 | 140 | 77 | 791  | AAACTGCCCCCTATTGTAAGTGGCAATGTTAGTCTTGCATTCGTGAGCCAGTTGA      | 11412 | A_95_P194167 EH622303     |
| 11893 | 140 | 78 | 572  | TCCCTTGGGAACCAAATCTTCAGAAAGTTAGTCAGACTCCGAATGGACTGGATCCAA    | 11414 | A_95_P082460 BP528518     |
| 11895 | 140 | 80 | 453  | ACAGTTGAAGCAAAGTATGAATATCCAAACATGGCATTCAATTAGCTGTAATGGAAG    | 11418 | A_95_P211982 TA19732_4097 |
| 11896 | 140 | 81 | 576  | GATGACCCAGATAATGCTTATTTGCTTATTTTACAGCATTGTATCCCTTACACTC      | 11420 | A_95_P139162 FG144494     |
| 11899 | 140 | 84 | 1209 | TAGGCATATCAATGTATTGTGTGTGCCAAATTCATAATATGTTGACGACCAAGTTCC    | 11426 | A_95_P031626 TA18069_4097 |

|       |     |    |      |                                                             |       |              |              |
|-------|-----|----|------|-------------------------------------------------------------|-------|--------------|--------------|
| 11902 | 141 | 2  | 837  | TCTGGAGTTTACAAGCATGTAACAGGGCAAAGTATGGGAGGCCATGCTGTTAAGCTT   | 11431 | A_95_P245427 | EB438565     |
| 11904 | 141 | 4  | 514  | GTGGATTAAGTGTTGATGAGGATGTTACATAGTAGCTAATGTTGGTGATTAATTA     | 11435 | A_95_P124057 | DW003905     |
| 11907 | 141 | 7  | 574  | TATAGTCAATTTTTGGCCTAAATTTGGTGCGCCTGATTTGTTAAACACCAGGAAGCTT  | 11441 | A_95_P143307 | EB446652     |
| 11916 | 141 | 16 | 614  | TACATCCTTATTGAGCCTTTGCTGCCTAATCCCAAATGATGGGCGTTTCGTTCCACTGA | 11458 | A_95_P297933 | FG639155     |
| 11917 | 141 | 17 | 362  | ATAATTAAGCCATTTTTCTCCTGCTGTAGTTCAGTGTCTAGGAGTGGAACACTTTT    | 11460 | A_95_P051801 | BP132744     |
| 11918 | 141 | 18 | 332  | TCTTCCTCTAAACTTTGTGCGGGTACCTTTGTGTACATATTTATGTTAAAGCTTTCCC  | 11462 | A_95_P140817 | EB444644     |
| 11919 | 141 | 19 | 415  | TGCTGCAGCTTCATTTGGTCAGGTGTATAAAGGGAGTATACTCAATGGTTCAAGTGT   | 11464 | A_95_P088128 | BP529967     |
| 11927 | 141 | 27 | 1421 | GTCACCTAAGTTGTTACTTGCACATATATTTCTGACCACATTTTGTGTCAAGTTTTG   | 11480 | A_95_P027486 | TA14793_4097 |
| 11929 | 141 | 29 | 791  | TAAGGAGTGGTACACGAACCATAGGCCGAATTTAGGATTTAACTTAATGAGTTCAGC   | 11484 | A_95_P021916 | EB677429     |
| 11934 | 141 | 34 | 524  | TCTCTCTACTTCCTAAATGGATGTTTGAGCTTTCATTGCCAGCATTGCTTATGATTTAA | 11494 | A_95_P019821 | FG641597     |
| 11938 | 141 | 38 | 991  | CTAGTGATGATAATGATCCACAAACCTTGTAATAAACTCCCTTCTTTTTCTCCATTC   | 11502 | A_95_P010391 | TA13920_4097 |
| 11940 | 141 | 40 | 847  | CCAACTAAGGTTGATAGAAGTGGTGCATATATTGTAAGACAAGCTGCAAAAAGCATT   | 11506 | A_95_P188517 | EB677645     |
| 11951 | 141 | 51 | 908  | TGGCACCTTTTGATGTGCAGAAGTTTCAGCCCCATATGTGCATTATGATGCTGCTTT   | 11527 | A_95_P227534 | DV161802     |
| 11952 | 141 | 52 | 1590 | CAGTGGTCACATTTTCTGAGATGCTAAAGAGCATCATTATAGATGTAAACGAATTCTG  | 11529 | A_95_P018481 | TA14633_4097 |
| 11953 | 141 | 53 | 596  | AGGTACTTTGTTCTGAATGATGTCTTTCATTTGTATGAGAGGGGAGTGAGCTTCTCA   | 11531 | A_95_P164967 | EH624431     |
| 11956 | 141 | 56 | 68   | GCCCTCATGTATTGCCAATGTAATTTCTCCTCTAGCAAACCATATGTATTACAAACTA  | 11537 | A_95_P202232 | TA17591_4097 |
| 11957 | 141 | 57 | 832  | CCCAACTCTAAATGGATGGCTGCTTGGTTATCCTATAGTTTACCTATTTGGGATGTCT  | 11539 | A_95_P146727 | EB450849     |
| 11959 | 141 | 59 | 646  | TGTGTAACATGGGGTCTAATCGTGATGGTGATGGTTTACACCGTGGGACATATATCA   | 11542 | A_95_P316698 | FG196196     |
| 11962 | 141 | 62 | 120  | GAAATTAACGGTATTATAGTCAGCCGCTCTCCAACACCAGTAGTTACAAATCACAC    | 11548 | A_95_P170064 | EH664817     |
| 11965 | 141 | 65 | 106  | TACATGTAGTGAGAAGGTAGACTTTTCCCATGTGATGCCACCTCCATACATCATAAT   | 11554 | A_95_P108867 | CV019042     |
| 11967 | 141 | 67 | 786  | GAATCGACAATGTAGTCTTACAACAGAAATTATGAATACCTAATTGGTTGCCTATTGT  | 11558 | A_95_P009381 | TA13492_4097 |
| 11969 | 141 | 69 | 193  | TATACTTCCAGAGGAGCATTCAAAAGCAAATCCGAGACGTGAATCCCCTCATAAGGT   | 11562 | A_95_P132647 | EB433208     |
| 11971 | 141 | 71 | 0    | GGCTGATTTTAAACCAAGCTTTCCCCCTTCACTCTTTCATTGTCAAATAAAAAATAAA  | 11566 | A_95_P285963 | A_95_P285963 |
| 11974 | 141 | 74 | 778  | CTCTGTATCATGGTTGATTTATTTAGGGCTCTCAAGTCAGGGCCATATGCTATTTAA   | 11572 | A_95_P014916 | EH615319     |
| 11976 | 141 | 76 | 162  | CAAATCGGGGATTATTATCGGGGGATACAAACAGAGTTGTTCTCATAAATACAAATC   | 11576 | A_95_P092078 | BP531630     |
| 11977 | 141 | 77 | 1392 | GCATTTGGCTGTAGACATAGTGATGATTCTTATCAAATGCATCACATTCACTCAAA    | 11578 | A_95_P251732 | AJ271749     |
| 11979 | 141 | 79 | 784  | ATAATAGCAGATCAGTGTGCTGAGTGTGATCTCACAGGCTAAGAGAATCTCCTGAAG   | 11582 | A_95_P312248 | FG160767     |
| 11980 | 141 | 80 | 776  | CGCGGTGTTTTCTGTATCTTGATGGCTTTGTAATTTTTATTTACCTGAATCCATCTGGA | 11584 | A_95_P296083 | EB449797     |
| 11981 | 141 | 81 | 698  | TGGATTCTGTTATATTTTCCAGCACAAACATTGTGCATGCGAATAACAATGGATGGCTT | 11586 | A_95_P162437 | EH623509     |
| 11988 | 142 | 3  | 661  | ATCACGCTTTGGTAACCTCCATGCGACAATTCACAAATATTGTGTGATCAGCTTGAA   | 11434 | A_95_P315018 | FG194337     |
| 11991 | 142 | 6  | 501  | TTATACGTAGTTTCTTGATTGTCTGGTCATCCCTGCTATGTATGTTTCATGCCGTGATA | 11440 | A_95_P004691 | TA15684_4097 |
| 11995 | 142 | 10 | 610  | GATGCCAATTACTGTAGCTTTCAATCATTTTGGAAAGAGATGGTACAGAGAATGCCA   | 11448 | A_95_P005991 | BP128327     |
| 11998 | 142 | 13 | 1931 | CCATGGGTTGTTCTGCGCTCTTTTGTATTTTCTGGGTTTTGGGGATAATTGGCTTTTCC | 11454 | A_95_P188742 | TA14638_4097 |
| 11999 | 142 | 14 | 433  | AACTTAACTGAGTATGTATTTACCTGTCTCCATAATGAAATGTGTAGTTGAGCATCG   | 11455 | A_95_P156202 | EG650462     |

|       |     |    |     |                                                             |       |                           |
|-------|-----|----|-----|-------------------------------------------------------------|-------|---------------------------|
| 12000 | 142 | 15 | 703 | TTTCTACAATCATTGGGTCTTGAGAGTATGCATTACATTTAGCTGAAGAAGTTGATA   | 11457 | A_95_P164797 EH624132     |
| 12001 | 142 | 16 | 443 | TTTTTGATTCTCAGGACAGGTTGAAATTGGCTGATTTTGGATCTGCGGAGTGGTTGT   | 11459 | A_95_P217727 FS407656     |
| 12010 | 142 | 25 | 630 | AAGATGTTTTTGGTGCACAGATGCTTTTCAGTGTCAAATGGAATATGAGTGCTATG    | 11477 | A_95_P210817 FG641774     |
| 12014 | 142 | 29 | 773 | TGTGGTGTGTGAGGTGTGAGAAAAATATGAATGAGTATATCTCTCTCTCGCTCAC     | 11485 | A_95_P216347 TA20685_4097 |
| 12017 | 142 | 32 | 805 | ACCCACTTCTAAAGGACTGTGAACTCCTTATCATGGATGCTTTGCGGCCAGATAGATC  | 11491 | A_95_P146992 EB451223     |
| 12019 | 142 | 34 | 808 | GCGCCTATGGGTAAGTAAGGCAGCAAGAAGGTAAGTGTGATTTTATTTGCAAAATAA   | 11495 | A_95_P263461 EB450466     |
| 12025 | 142 | 40 | 427 | TAACAAGTCCATTGAGATTCGTAACCTCCTTGGCGAGAAGAGGGTTAGGAAAGTGG    | 11507 | A_95_P102577 TA11943_4097 |
| 12035 | 142 | 50 | 362 | TGCCATTTGTGAGCTCAATTATGGAGCTTGCCTAACTCTGTAATTTAAAAGATACTC   | 11526 | A_95_P151702 EB681945     |
| 12037 | 142 | 52 | 352 | ACTTTAGCTACTTGTCTGTTGTTGCCTATTAGCTTATCGTTGTGTTCCCTCCAAATT   | 11530 | A_95_P024266 FG636220     |
| 12040 | 142 | 55 | 641 | CTTAACAATGGATTTCACTTTTTGGTTTGTGTAATATACAGCTCCTGGATTTTCACTCA | 11536 | A_95_P177812 FG158081     |
| 12041 | 142 | 56 | 313 | CCTCGTTTGATTGGGTTGCAACGTGATGATCTGCCTACAAAACCCGAGATGCTTACA   | 11538 | A_95_P058136 BP134401     |
| 12044 | 142 | 59 | 585 | TGTGGATGCTTGGTTGGATTGCTTGCATTATGGTTGTGTTGTGAAGTATGAATTTAG   | 11543 | A_95_P065865 BP136446     |
| 12054 | 142 | 69 | 349 | GCTGCTGTTCTGTATTGGAATTATTAGTTGAGCTCTACTGCTTGTGTTGCTTAAGAGG  | 11563 | A_95_P163687 EH622784     |
| 12056 | 142 | 71 | 774 | TCGAATTCCTGTACTTGGGCAGTCTGCTTCGCTTGCAAATACAATTTTGTCTGCATCT  | 11567 | A_95_P218662 TA21226_4097 |
| 12062 | 142 | 77 | 752 | TAGTCGGAAGAAAATAACTGTAGTAGTCTACTGTTGTTGTCTGCTTCTTGAGAGAC    | 11579 | A_95_P142297 EB445810     |
| 12063 | 142 | 78 | 380 | CCTTCATTTGATCGAAGCTTAAACCCGAGGATCTGCCACAAAGGAAGGACAAAGAT    | 11581 | A_95_P127217 EB426686     |
| 12068 | 142 | 83 | 553 | AACTTCTGATTGAAAGAGAAGATCATGGAATTGCACTATACACTCTGTTGAAATAAT   | 11591 | A_95_P031826 TA16803_4097 |
| 12070 | 142 | 85 | 816 | ACCGACGCAGTGGACTTTATTATCTTCCCTTATAAAGGCACCAACTCTCACAGAT     | 11595 | A_95_P301478 FG171813     |
| 12072 | 143 | 2  | 606 | TTCTTTTATTTGCTACGTTCCCTGAACAGTAAAGAAGTGGAACAAGAACAAGCTGCT   | 11598 | A_95_P216647 TA20751_4097 |
| 12073 | 143 | 3  | 627 | TTCCTAAAGATGAATCCCCTTGCATTGGGTTGAAGGGAAAGCCTTATCCCTCTGGA    | 11600 | A_95_P161042 EH619747     |
| 12074 | 143 | 4  | 347 | GACTGCTCTATGTGTAATACATCAGTTTTTATCCACCCCTTATAAGTTTCATAGTGCA  | 11602 | A_95_P030156 CV020316     |
| 12075 | 143 | 5  | 280 | CTGCTTCAGCTAGGTAAGTTCCAAGATTCCTTGTATTGTGCTTTCATTTGAATGATTA  | 11604 | A_95_P006796 EB431057     |
| 12076 | 143 | 6  | 785 | ACCGAACTCGTAGTTATAAGGCTGCCTCCACCCTGAGTAGTACTATGGTCTATTATTG  | 11606 | A_95_P296303 EB451287     |
| 12078 | 143 | 8  | 225 | TATGAATTATGACAGTTGATGAGACCTCGATGCTTGTCTATAACCTACTTTTGGTGTT  | 11610 | A_95_P202397 TA17625_4097 |
| 12079 | 143 | 9  | 545 | TCCTACTGATCAGGACAGCATGTTATGTTATTTACATAGTTTACATTCCTCTTCAAG   | 11612 | A_95_P307203 FG637773     |
| 12080 | 143 | 10 | 457 | GAGGACAAATCAACTCCTTGTATATACTATATAGGATGTAACCTTATATCCACTGACAG | 11614 | A_95_P027326 BP134187     |
| 12086 | 143 | 16 | 90  | GTCTTCTTAAATATTGGAACCTCCGAAGCAGTCCAGAAAATGTCCAAAATCAATACCG  | 11626 | A_95_P144322 EB447310     |
| 12087 | 143 | 17 | 289 | CCCTAGTTTCCAATCCATGTTGACACAACCTGGAATTAAGTTTATGCATTGAATTTGAC | 11628 | A_95_P208517 TA18985_4097 |
| 12091 | 143 | 21 | 809 | GCTCATTTACTCCAAGTATACCCTGCAATTGATATATGAGCATAGCTGTATCTTCGCTC | 11636 | A_95_P296808 FG136523     |
| 12092 | 143 | 22 | 641 | ACGACTTCACTTTTTGTGGCACTTCGTAATTTTGGATGTGATATTACCATGTGAAC    | 11638 | A_95_P017926 TA17390_4097 |
| 12093 | 143 | 23 | 586 | GGTGGTACTTGAGAGTTAGCCTTACATGGGAATTACTTGTCTATGCTGTAATTATTA   | 11640 | A_95_P027491 EH617143     |
| 12094 | 143 | 24 | 872 | ATACAATCATGCTTGGTTTCACTACTGACTATGATGAGTACTCTGATCAATATAGATG  | 11642 | A_95_P208147 DV161905     |
| 12095 | 143 | 25 | 481 | ATGTGTTTCAAGGGTTTTGGATATCTGAAATATTTAGTAAGTTGGATACTGGATTCCC  | 11644 | A_95_P263311 AM828261     |
| 12098 | 143 | 28 | 523 | AAGGCTTAATCTTCCCAACTACCCCTTCGTCAAAGGAGTCTTCCAAGGATGATTCTTC  | 11650 | A_95_P158652 EH616548     |

|       |     |    |      |                                                              |       |              |              |
|-------|-----|----|------|--------------------------------------------------------------|-------|--------------|--------------|
| 12101 | 143 | 31 | 887  | GATAGTCAATTATTGTTGCTCTCCCTGTACTATTTATCTTGCAGGGATTTGAAGCAT/   | 11656 | A_95_P294663 | EB442981     |
| 12111 | 143 | 41 | 760  | CCTCTTGCAATGAATACATCATTCAATGTCTGGGCAAAGGCAATTCATGAAATTACA    | 11676 | A_95_P119822 | DV999410     |
| 12113 | 143 | 43 | 747  | TTTTCCGTCACGAATGGGAAGTATATTGTAAGCGGCTCAGAGGACCGATGTGTCTAT.   | 11680 | A_95_P144637 | EB451710     |
| 12116 | 143 | 46 | 649  | TGTATTGGAGGATAGGAATGATGCGGAAGATGATTTCTTTTACCCAGCATCTGGATG    | 11686 | A_95_P053896 | BP133305     |
| 12117 | 143 | 47 | 840  | CAGAATCCCACCTCAATGCCTCTAATGTAATCCTTATTGGCAAAGCTAGTTAATTACI   | 11688 | A_95_P018646 | DV160117     |
| 12126 | 143 | 56 | 1927 | TGGTAAGGATGCTTGTGAATTATGTTACCATGAGACAAAGGAAATGGTGCCTGAA/     | 11705 | A_95_P239534 | AY081175     |
| 12133 | 143 | 63 | 79   | GTCCTCAGCTTTGATGAATTCAGAGTTATGATGACAAGTTAGAAGAGTTCAGAAAAGA   | 11719 | A_95_P003201 | CV021135     |
| 12136 | 143 | 66 | 472  | CTAGGACCTCATAGGATAAGATGTCATATTTTCTCATCTTTTAGTCCATTTTCCCTGT   | 11725 | A_95_P049366 | BP132145     |
| 12139 | 143 | 69 | 838  | AATATGATGGTGGGTGCTTCTCACATCACTGCTGTAGGAAGCTGCGTAAAGACTAC     | 11731 | A_95_P266586 | FG144602     |
| 12140 | 143 | 70 | 710  | TCTCTAGATTGAAAGAGCTGCTCAGCCGCTATTTTACCCTTTTCTCGTATCGAGCT     | 11733 | A_95_P130722 | EB450467     |
| 12141 | 143 | 71 | 377  | TTGTCTAAAAGCATTAGCAAGCCTGCATTGCTGGCCGACGATCCAAACATGTACTTGC   | 11735 | A_95_P278793 | AM838831     |
| 12142 | 143 | 72 | 1041 | CACTGTTTTGGATGAATAATTCTGCTGGCTGCTTGTAAAGAGATTTTCTCATGTTTCA/  | 11737 | A_95_P007026 | TA20978_4097 |
| 12145 | 143 | 75 | 346  | CAGACAATAACAATGTTAGCACTATTATACAATGGGTTTCCGTAGTTTGAATGAAATGC  | 11742 | A_95_P002411 | FS416760     |
| 12146 | 143 | 76 | 346  | AACAACAACAGCAACAATCTGGTAGCTCTGGCTTTATGGAAGGATGTTTGGCTGCAC    | 11744 | A_95_P000591 | FG193869     |
| 12151 | 143 | 81 | 849  | CTATGACCGACGAGCTTAAAGATGTGAATTTGTACGGTAAACATTGAAGTTCCTTTC    | 11754 | A_95_P013066 | TA13881_4097 |
| 12154 | 143 | 84 | 950  | TTTGCATTTTCTGTGAATATTTGGTGGGCGTTTGGACATAACAATCGTAAAATTTGCI   | 11760 | A_95_P029681 | TA16286_4097 |
| 12156 | 144 | 1  | 344  | GGGTGTATGGGTGGTTGTCAATTGAAGATAATGTGAACATGGACTATATTTATTATTT(  | 11597 | A_95_P133067 | EB434138     |
| 12160 | 144 | 5  | 871  | CTTGTATGCAGAAAGTATGAAATGCATTTCTGCTGAGGCAGCAAAATGCTGCTTTT/    | 11605 | A_95_P200542 | TA17229_4097 |
| 12161 | 144 | 6  | 1049 | CAGGATCCATTTGCTGCATCTTTGACTGTTCCACCTCCTTCATATGTACAAATGGCGG/  | 11607 | A_95_P112872 | TA13518_4097 |
| 12162 | 144 | 7  | 98   | CCGTTGGCATCAGATCAACACTTTAATCAGCTTATAATGCTATACTTGATCTGATAA'   | 11609 | A_95_P163872 | EH622917     |
| 12163 | 144 | 8  | 437  | AATAAACATTCTCGCCACATTATGGGATGAAGGAAGACAGATTTAAAAGGGCAATGC    | 11611 | A_95_P283293 | AM799615     |
| 12164 | 144 | 9  | 625  | GGTCTGAGTGATTTGGAGCGAAGCAACTAGGAGTTGGACGAGCTTGATATCTTGA1     | 11613 | A_95_P135772 | DW000043     |
| 12169 | 144 | 14 | 535  | CTGTAAAACTGCTCTATGTGATTAGTGATGACATTCATTATCCAAACAAACCACACI    | 11623 | A_95_P021091 | BP534904     |
| 12171 | 144 | 16 | 854  | GGCCTTGCCCATGTAGTCTTTTGAGGCTTTTCATTTTATGCTAAAGCTTTCTATTTTT/  | 11627 | A_95_P009676 | EB449882     |
| 12172 | 144 | 17 | 17   | ATATTTTCGTCAATGCAGCTTGCAAGCTGCAGAGAGGAGAGTCAATGTAACCTTATA/   | 11629 | A_95_P095798 | AJ718758     |
| 12174 | 144 | 19 | 818  | TCCCAGCAGCATGGCATATACTGGCCTTTATGATATGTTTAGATTCTTTTTTTGTTCTTT | 11633 | A_95_P187872 | EB678181     |
| 12176 | 144 | 21 | 794  | GATGTTGATTGAAAATTGTGACACTTAATCTTTGTAGCAGTGGCATGTCAGTTCCTTA   | 11637 | A_95_P245807 | EB451770     |
| 12178 | 144 | 23 | 822  | ATCGACTGATGAAAGGAAGAGAATTGAAAGTGCCGAGTTGTTGTGATGTGGGCTGT     | 11641 | A_95_P285228 | FG148388     |
| 12180 | 144 | 25 | 1106 | GGTCTAGATTAGCTCAAGGATGAAAATGTTGCTGTTATTGGATGTTGATATTGATGTI   | 11645 | A_95_P214827 | TA20348_4097 |
| 12181 | 144 | 26 | 685  | CCCCTCAGTCCATCTGATCTACAATTGGATCATAATTCAACAAGTAAATATACCTATCT  | 11647 | A_95_P017166 | TA13094_4097 |
| 12182 | 144 | 27 | 692  | GATCACCTATTTGAAGTCTTGCTTGACTGAAAGCGCTCTCTGATGCAACAGTTGAAGC   | 11649 | A_95_P289468 | FG643691     |
| 12185 | 144 | 30 | 745  | CTCTCATACATTGCTCTTGATTTTCGAGCAAGAAGTACACATCAAAGACTAGCTCTT(   | 11655 | A_95_P128138 | EB427675     |
| 12187 | 144 | 32 | 502  | CTTGTAGTGAATTAGAGCTGGCCATCTTAGTGGTACTGTCATTACAAACGGGAAC      | 11659 | A_95_P071180 | FG177765     |
| 12194 | 144 | 39 | 310  | GGTTGTCTCTGCTGCATACAGTAGAAAGAGTGTGTATCTCAAATAAACTGATAAAT(    | 11673 | A_95_P157492 | EH615541     |

|       |     |    |      |                                                             |       |                           |
|-------|-----|----|------|-------------------------------------------------------------|-------|---------------------------|
| 12197 | 144 | 42 | 901  | TAAAGTCAGATGGCCTATTTTTGGCAGCTATTCTTGGTGGAGAAACATTGAAGGAGC   | 11679 | A_95_P296943 EB680517     |
| 12198 | 144 | 43 | 491  | TCATACTCCTTTTTCCCCTCCATTAGGTGTTCTACATCATACTATAACAAGGCAAAC(T | 11681 | A_95_P255774 AM842133     |
| 12199 | 144 | 44 | 439  | TGGCATATTTTGAAGTCATTTCTCACTTGGTCTGACCAAACAGACTCTACTGGGGAAT  | 11683 | A_95_P033594 AJ632860     |
| 12200 | 144 | 45 | 400  | CCCGGACTAAGCCCAGGCCAACGGCTATTTAATATTGTTTTAATATTATTTTTAGCG/  | 11685 | A_95_P037493 BP129019     |
| 12202 | 144 | 47 | 441  | TTCTGTCAACTTTTCTACTTTACAGTCACATTAGGAGCAAATCCAAGTTTCTGCGTGC  | 11689 | A_95_P273136 AM818734     |
| 12203 | 144 | 48 | 734  | GAAC TTGAGCAAGTCATAATTGGTGACTTTCTTAAGCTTCTTCGGTAGAATTGATATG | 11690 | A_95_P272796 EB678279     |
| 12204 | 144 | 49 | 252  | GGGCAGTGCTCTTAGTCTGTAAC TAATTTTGTTAAAAGTTGTGGCTTATGAGCAACC  | 11692 | A_95_P213672 TA20098_4097 |
| 12206 | 144 | 51 | 0    | CTGGGATTGCTTAGAGCATAGTGAAAATGCAACTTAGTTCAAATTGTAATCCTTAC    | 11696 | A_95_P309318 A_95_P309318 |
| 12209 | 144 | 54 | 496  | GGGTTTCTTCTGAATTGTGGTGGTTGTCCTTGATTTTCAGATAATAAATTTGGTTT    | 11702 | A_95_P002436 TA12805_4097 |
| 12213 | 144 | 58 | 556  | GGTTGTGCTGTCATGAATATGGATTTTCAGGTTTTCTGGTGTTATATCAGAGTATTGGT | 11710 | A_95_P153977 EB684143     |
| 12214 | 144 | 59 | 1045 | TTTGCGCCATTCTAGGTAATGATGTAGTAATATACTCCATTCTTTGAGACGATTGTGG  | 11712 | A_95_P008011 TA16773_4097 |
| 12218 | 144 | 63 | 432  | CTCGATATCATGGAGAACGTGCCACCAATATGACAACATATCGAGATGCCCTTATATC  | 11720 | A_95_P145202 TA14564_4097 |
| 12222 | 144 | 67 | 483  | GATAGCTGATTCATACATGTAAGACATGCCGCAGATTATTCTTTCAACAATGTGTAA   | 11728 | A_95_P025561 TC59594      |
| 12224 | 144 | 69 | 870  | GATGTTCTGCTCCCACTAACACAGATTTGTACAGTCTCTCCAACACTAAAATGCATC   | 11732 | A_95_P233634 FG159928     |
| 12227 | 144 | 72 | 730  | ACCATGGTTGATGGTACCTCTAACGATAGTGTTAATGGTGCTTAAAGCTGTTCTTTTC  | 11738 | A_95_P232319 DV999927     |
| 12239 | 144 | 84 | 627  | AAGTATATCCAGATATCTGTTGAATCCTGATGAGTACTCATATCAAGTTCATGAGG    | 11761 | A_95_P027441 TC67685      |
| 12241 | 145 | 1  | 812  | AAAGAGAGGAGCCAGATATTGGTGATTCCTCTAATTTTAAATAGTGACTTGGCTCTG   | 11764 | A_95_P215067 TA20404_4097 |
| 12242 | 145 | 2  | 1098 | ATCTCCCCCTTCATTTTATTTGAAC TTGTTGATTGGGCAGAGTTAGTAAAAAGAG    | 11766 | A_95_P027661 TA21617_4097 |
| 12246 | 145 | 6  | 547  | TAATGAGGCCCTTCCACTCTGATTGTAGACCAAACCTCTCTGCTGCATGGTTGACAAAG | 11774 | A_95_P262341 BP135370     |
| 12250 | 145 | 10 | 694  | GATTATGATGGCGTATATGATGATATGAAAATGAAGGCTGTCCAACCTCGAGCTCAG   | 11782 | A_95_P138047 EB441765     |
| 12251 | 145 | 11 | 687  | GTTACACTGTAAGGCAAAGCCTTTCTATTATCCTGCTGTGTTAAAATTCCACTAGTA/  | 11784 | A_95_P288528 DW003497     |
| 12252 | 145 | 12 | 512  | GCAAGGATACCAATCGATTGGTATTGATTGATTTTGGTCTGAGCTTTACATCAACCCT  | 11786 | A_95_P148307 EB677576     |
| 12259 | 145 | 19 | 715  | GTGTTTGAATCGATTTGATTTGTGGAAGATTTGAATCTTTTGTGATTGTTTCGGTGTTC | 11800 | A_95_P215602 EB438670     |
| 12261 | 145 | 21 | 809  | TATGATGAATGACATTGAATTAGTGCTTAAGGCAATGGTTTCTGTGCATTGGTATTTT  | 11804 | A_95_P205852 TA18379_4097 |
| 12262 | 145 | 22 | 907  | ATACGATGAAGGAGATTGGAGCTACTCCAAGTCATCTGCTGTGTTTATTCCCATGC    | 11806 | A_95_P126487 EB450618     |
| 12272 | 145 | 32 | 0    | CAGAGCGTTGTTGTGGATCTTAAAGTGATTCTCAAGCAAGAGAGAGTGAGATGGCT/   | 11826 | A_95_P258596 A_95_P258596 |
| 12275 | 145 | 35 | 823  | ATGGCTTCAAGCAATTTGTAGTGGGTCAATTATGTATTTGAGTGTAGCATTATGTTTC  | 11832 | A_95_P206047 TA18421_4097 |
| 12277 | 145 | 37 | 591  | GATGCAAGTGGGATGTTCCTTTTGAGAGTATGCTTTCGTTTTGGATTCTATTGGATTA  | 11836 | A_95_P161527 EH620236     |
| 12279 | 145 | 39 | 684  | AAAGTTTCGCCCCCTGTTGTTGAGACTCACTGAGTACAATGGATGGTACTGACATTCT  | 11840 | A_95_P134727 EB437409     |
| 12281 | 145 | 41 | 503  | CCCGGTGTTTCAACAACAGGAGAGATTTGTACATGCTGTATCATTACCTAAAATCA    | 11844 | A_95_P066600 BP136643     |
| 12286 | 145 | 46 | 155  | CGATGACAATGATGATGACGATGACGATGACTGATGACGATGACGATGAAAGATAC    | 11854 | A_95_P064610 EB445150     |
| 12289 | 145 | 49 | 270  | AGAGCCCTCTTAATAGCCTGCTGCAATACCTTTAATTGGAAGAACAAGGAAGGATGC   | 11860 | A_95_P002093 BP129711     |
| 12302 | 145 | 62 | 0    | TCAAACAGATCTGCCTAGATCTCTCATTGATGACGTGAATATGCCAACACAGACACCA  | 11886 | A_95_P236104 A_95_P236104 |
| 12305 | 145 | 65 | 898  | GTGGGTGAAGCGTGGTGAATCCACACATTCTGTTTAAAACATCAAATAATTTATTCA/  | 11892 | A_95_P194032 TA15805_4097 |

|       |     |    |      |                                                               |       |                           |
|-------|-----|----|------|---------------------------------------------------------------|-------|---------------------------|
| 12306 | 145 | 66 | 819  | TGTTTCGATGGATGTTTTCTGCAGACTTGCAAAGATAATGCTTCTTTTTTACATCA      | 11894 | A_95_P013901 TA13753_4097 |
| 12310 | 145 | 70 | 839  | GGTTGAGTTTGTAAAGCTTGTTCAAGTTAAACAAATTTGAAAGTTGTTGGTCTGGC      | 11901 | A_95_P023971 EB449629     |
| 12317 | 145 | 77 | 544  | AAGGTTTGGCTCATACGTATGTTACTTTATCTGTGTATGACAGAGAACTTTTAGCCAT    | 11915 | A_95_P121902 DW001989     |
| 12318 | 145 | 78 | 264  | ATTTGAGATATTGCCATTTGCTCTGGTTAAGGAATGCCACATGAGTTCGTCAA         | 11917 | A_95_P092008 BP531602     |
| 12319 | 145 | 79 | 513  | TTTTGGCCTATTTCTGACTTCCGTTACTTCTAAGCTTCAAGCATGAAGGAATTCAAAAC   | 11919 | A_95_P158332 EH616324     |
| 12320 | 145 | 80 | 862  | CTCAATAAGGCCCTTGATACCTTCAACACTGCCGTTGTATCTCTATATACTATGTTAT    | 11921 | A_95_P208347 TA18949_4097 |
| 12333 | 146 | 8  | 416  | GCACCTCTTGATATGCTGAGTTTAGTTAAGTAGTCTAGTTTAAAATGTTAACTTTC/     | 11779 | A_95_P211212 EH621285     |
| 12338 | 146 | 13 | 684  | TCTGAAAATTCAGAGTCAGATTTGAGTTCGCAGCGTGTGACACTTGGATTGAATGCA     | 11789 | A_95_P086500 FG152206     |
| 12339 | 146 | 14 | 752  | GAGAGGGACTGGAATTTGGAGGCTAATGTTGAGAATGGCAAATGCTGTATGCAG/       | 11791 | A_95_P244017 FG638547     |
| 12340 | 146 | 15 | 822  | AACTTGTCACTATTCTGGATCTTCTCGTGCACGCTGTCCTTTCTTTCTAGTGT         | 11793 | A_95_P126612 EB425931     |
| 12342 | 146 | 17 | 779  | AGCAAACATCAAAGGAAACGCCCTCCTCAAGAAGAAGTAGGAAGTGTGGTCGAA        | 11797 | A_95_P121247 DW001268     |
| 12343 | 146 | 18 | 112  | CATGTACTCGAAAGAACCATATTTTGATGTATATGTGGAACAGTAGCAATTGGTTAC     | 11799 | A_95_P257419 EH623419     |
| 12345 | 146 | 20 | 231  | AACTCTGGTCACCGCTCACAGATAATCTAATTTCCGGCCAAATTATTGAGTTTTGGCG/   | 11803 | A_95_P158912 FG643060     |
| 12346 | 146 | 21 | 613  | CCTTCTTTGTTTGTGTTGCTGCAATTACTATGTTGATAATTCTATGTTCCGGAGCAGGG/  | 11805 | A_95_P129237 EB428951     |
| 12350 | 146 | 25 | 875  | TAAATCTACAGATGACCTCTCCTCCCTATCGCTTTATCACTATTATTGTGCTCCTGGG/   | 11813 | A_95_P288203 FG167361     |
| 12354 | 146 | 29 | 349  | TCATCCATAGAAGGAGTTTAAACACAAGATTGGTTATGCTCTTTTCAGTTAATCAGC     | 11821 | A_95_P105277 CV017392     |
| 12357 | 146 | 32 | 768  | GAAGCATGCTCTGACCCTCTTACAGATTTTATTGCTGTTTTTGTGCGAATTTAATCA     | 11827 | A_95_P135927 AF390556     |
| 12358 | 146 | 33 | 378  | CTGGAGAACTTTTTATGGATGTCACCTGATTATAAGATGCTTGGTTAATCAACTCT/     | 11829 | A_95_P023146 AM824341     |
| 12359 | 146 | 34 | 725  | TGATCATGTATCATCTTTGCTTTCTATTTTGCCTTCTGATGGTAATAAGTGGATGGT     | 11831 | A_95_P182182 TA13150_4097 |
| 12363 | 146 | 38 | 365  | GATGGAATAGCAACTCCAAACCACTTCTTAAGGCTAAATGTCTTTTGCTTTTGTACA/    | 11839 | A_95_P131342 AM806952     |
| 12364 | 146 | 39 | 698  | GAATGCTTCTGTAGTACTGTGCGAACCAGACTTTAGAATTATAGAATTATGGCAATTC    | 11841 | A_95_P026546 EH618938     |
| 12367 | 146 | 42 | 835  | GCTGGCATTGTAGAATGTGCCTTTGTGTCTTCTCAGGTGACTGAACTTCCATTTTTCG/   | 11847 | A_95_P230799 DV157984     |
| 12372 | 146 | 47 | 439  | ATCAAATACAGCATTTAGTGTAGTGGGAGCCTGGGTTATTGAGAGTTTTGTACATCA     | 11857 | A_95_P204352 TA18047_4097 |
| 12374 | 146 | 49 | 706  | TGATCGTTTGTGTTGAATACAATCAGACACTTCGAAACCAGTTGCAGTCAATAAGCCAT   | 11861 | A_95_P144677 EB448177     |
| 12376 | 146 | 51 | 682  | TGAAGGTCAACTTTACTACAGTTTGGCCAGGAATTTGAGAAGTATTTGTGGTACTTT     | 11865 | A_95_P232594 FG643793     |
| 12377 | 146 | 52 | 1445 | AAGGGTATCTTTATCTCCTGGCAATTTGGTCATTGACGACGAAGATTTTGTAGTTGGA    | 11867 | A_95_P303508 TA15330_4097 |
| 12380 | 146 | 55 | 766  | CCTCTGGTGGAGACTTAGTAGAAATGAGAACTTGAGAAGTAATGAATGTTGTAATA/     | 11873 | A_95_P117947 DV160934     |
| 12381 | 146 | 56 | 693  | GTCATTTAGTTGATGTTAGAGTCTGTCATAGTCCAGTTAAGTTTGTGCGAGTCTTTGT/   | 11875 | A_95_P206782 TA18593_4097 |
| 12390 | 146 | 65 | 627  | ATTTCCGGTGAGAATCTGCCGTTTCCGATACTGAATCCATTCACATGTTTCTGTGA/     | 11893 | A_95_P132745 EB439272     |
| 12392 | 146 | 67 | 520  | TATCAATGAAATGGATGGGAAAGAGCTGCTCGCTCAGCCAATACATGTTGATTGGGC     | 11897 | A_95_P148178 EB683371     |
| 12393 | 146 | 68 | 758  | TAAAAAAGAAAATTCTGCTGATGGTTGAAGTTGGTGGTCTGCATGAACCTGCTGGTA     | 11899 | A_95_P153112 EB683435     |
| 12399 | 146 | 74 | 909  | ATGTGTGAATGGAGAAAGCTACTGGTAATGCGTCTCTGAGTTGCATTCGGTCTACA      | 11910 | A_95_P008081 EB680954     |
| 12401 | 146 | 76 | 630  | CTATCTTTAGTGCATTTACATCAATGTAAAATTGTGCGCCATGTATTGGGCAATTTAC    | 11914 | A_95_P090943 TA14293_4097 |
| 12402 | 146 | 77 | 266  | TCCTATTGCTTGTGTTGACAAAGATGTAAGTACTGCACTTTGAGTGGTATTGTGTCTGCA/ | 11916 | A_95_P112202 CV020573     |



|       |     |    |      |                                                             |       |                           |
|-------|-----|----|------|-------------------------------------------------------------|-------|---------------------------|
| 12403 | 146 | 78 | 772  | AACTATTTGCTGAGTTAGAGGGTAGATACCAGTTCTAGTTCTGGCACAGCAGTTCTCC  | 11918 | A_95_P241694 FG147471     |
| 12405 | 146 | 80 | 385  | TTTTTCGTCGAGATTTGCGTCGATTTCCGGTTTCAGCTAAGTCTTCAATGGATTTGGGC | 11922 | A_95_P089613 BP530570     |
| 12406 | 146 | 81 | 737  | ATGAGCATACCATCTCCTAGTCATTTCTGCAATTTTCTATTTTCTGCGTTTAGGGGGC  | 11924 | A_95_P028986 EB428319     |
| 12409 | 146 | 84 | 391  | ATGAATCCAAAGATGGACTCTTGATCTCCAGATTTTCTCATGGTTTCCCTAAGCC     | 11929 | A_95_P050731 BP132468     |
| 12412 | 147 | 2  | 392  | TTTTATGATGGCTGTGTCAATGTTGCTTCTTTGTTTTGTTACAGAACTTTAGGTTTCTC | 11934 | A_95_P105752 TA15420_4097 |
| 12417 | 147 | 7  | 689  | ATATACATCATCTGACCCATAAGAGAACATACTTTGCCAGCAAAGGCAGCCACCGTT   | 11944 | A_95_P159447 EH617653     |
| 12421 | 147 | 11 | 549  | CTCGATGTATCTCAGGGTATATACTCTTCTGCATTACCATTAGAAATAAAAGTGTGC   | 11952 | A_95_P122057 DW002115     |
| 12423 | 147 | 13 | 812  | AGTCAAAGGAGAGCATGTAACCATCAGATCTTGGTGAACCTATTACATTAACCGA     | 11956 | A_95_P115462 DV157688     |
| 12425 | 147 | 15 | 365  | ATGATACTACGACGACTGGTTAGGTCGTCTGTTTGTAAAATGAGATTCATGGCTGA    | 11960 | A_95_P129857 EB429800     |
| 12427 | 147 | 17 | 830  | TGAAACTCTTGAGAAGTGGGTCCTGCTGGTGCCTTTGCTGGTCATACAGCAGTTTGTTC | 11964 | A_95_P150382 EB680474     |
| 12429 | 147 | 19 | 520  | CACTACAAAATATTTCTGCCATCTTGATTAATCTTGTAATCGCTGTGATTTTAGTGTG  | 11968 | A_95_P000231 CV020114     |
| 12430 | 147 | 20 | 1680 | GCTAGATACTTCTCATTACCCCTACAAGAGAAGACTAGATGCTGTAAAAATATTCGTC  | 11970 | A_95_P130902 DQ399915     |
| 12436 | 147 | 26 | 789  | CTGAGAGGAACTCTCGTGTCTTGTCTTTTCATTTACTGTAAGACATTATGGTCATATT  | 11982 | A_95_P018521 DV160610     |
| 12437 | 147 | 27 | 198  | TAGATGGTGTTCATTGACACTCTGCCAGTCAGATCCTGTTCTAAATGATGGGTGTAC   | 11984 | A_95_P158897 EH616784     |
| 12440 | 147 | 30 | 519  | GTTGCTGCAACAATGTTTCAAACATAACACTAAATCATGTGAGACCTTTGTATTTGCT  | 11990 | A_95_P268646 DW002369     |
| 12442 | 147 | 32 | 702  | CCCTTAGTAAGGGCTGTAATGGATACCTCTTTGAAGTGTCCATATATATGTGAAT     | 11994 | A_95_P013821 TA12500_4097 |
| 12443 | 147 | 33 | 817  | CCGAGAACATCCAACAAGATATCAAGACACCAATATTTATTTCCATGTCAGCATTGA   | 11996 | A_95_P126157 EB424698     |
| 12445 | 147 | 35 | 874  | AAGGCCTTGATGAAATGGCTGGCTGATTTCTTTCAACAATCAAGTTGAATTCTTGTTG  | 12000 | A_95_P015451 EB425092     |
| 12448 | 147 | 38 | 844  | TGATGTTTGATCAGCGACAGAAATCAATGGGTCTTCCAACAAGTGATGAGACACAGA   | 12006 | A_95_P231634 EB425013     |
| 12451 | 147 | 41 | 657  | TCTCATGGAAGTTCAGATAATCAGAGACAATGCTAGTTCCATGTTCTCTCAATGTTTC  | 12011 | A_95_P027826 DV159784     |
| 12459 | 147 | 49 | 313  | GATAACAGAGGAGACCTAACTGGTACTAGCTCAACTGAATTCCTCTTCTTTATTTT    | 12027 | A_95_P133782 EB435466     |
| 12462 | 147 | 52 | 678  | TTAATATGTTTATCAGTGGCAGGGTTCAGTTGTGGCATTGAAAGACCTTTTTCGAA    | 12033 | A_95_P292073 FG643223     |
| 12464 | 147 | 54 | 756  | TTATAGGCGTCTGATTACACTTGCATCCCTTCATTTGGTAATCAAATGTTATTTGTG   | 12037 | A_95_P272801 EB678285     |
| 12465 | 147 | 55 | 247  | AAATGGGTCGGAAATATCAACGAGCTGTAAAATTGCCAGCTTCACATTCAACGGAAT   | 12039 | A_95_P103917 CV016751     |
| 12468 | 147 | 58 | 546  | ATGAGGACGAACGGAGCTCTGAGGACTGTATGCTGCTTGTGAAGATTGAAATGTI     | 12045 | A_95_P160332 FG636077     |
| 12469 | 147 | 59 | 679  | CTAGTGGCAATATCCTGTGCATGTATGTTATTTAAATTTGTTGTGCTTGTGATCCAGTA | 12047 | A_95_P020816 DV999581     |
| 12470 | 147 | 60 | 649  | ACTTACAGAAGGTAGTTGGAGTGAAGCATTGATGGCCTTGGAAATTTCTTTACTGTT   | 12049 | A_95_P148327 FG152390     |
| 12472 | 147 | 62 | 295  | TAGGGGTCTATCTTAGTGTCTGTGATGATCATCTGTAATGGAATCTTGCTATTATTC   | 12053 | A_95_P143137 EB446478     |
| 12478 | 147 | 68 | 798  | GTTCTTCTGGTGAAAACAATGCTTACATGGTCGTTTATATTACTGCCATCGCATTCAA  | 12065 | A_95_P268581 DW002225     |
| 12479 | 147 | 69 | 290  | GACTGTATTTAGTACATTTTTGACTTTAGTTGTGTTCCGACCTTAATAGATGCTCATG  | 12067 | A_95_P093853 BP532448     |
| 12482 | 147 | 72 | 514  | GATCCACTTGGTTGGATATCTTCCCTTTTGATTTAAATTTGACTATTATCATTGGTTCC | 12073 | A_95_P022516 TC59898      |
| 12488 | 147 | 78 | 743  | GGGCTTGGTTGATTGTCTGTATTTATCCGATTGTTTACTCTTAAACACCATATTTATG  | 12085 | A_95_P021561 EB682980     |
| 12492 | 147 | 82 | 577  | TAAAGTAAACAACCCAGGCACTCTCAGCTGCTGGTAGAAATTCAGCATTGCGTGGAA   | 12093 | A_95_P068320 BP137101     |
| 12495 | 147 | 85 | 980  | GGCTCTGTAAAGAAAATGAAGGGGTCAAATAATACATGATTGAATCTTGGCTTAAT    | 12098 | A_95_P194872 TA15996_4097 |

|       |     |    |      |                                                              |       |                           |
|-------|-----|----|------|--------------------------------------------------------------|-------|---------------------------|
| 12497 | 148 | 2  | 1000 | CTCCAACATGCTATCAGTACTCCCTGAGACAGTTGGCTCCTTAGTAAGTCTAAAGAAA   | 11935 | A_95_P202477 TA17645_4097 |
| 12498 | 148 | 3  | 741  | GCGGAACACAAAGGCGTAAAGACTGTGTGGAAGATTACAGATTCATATAATTATTGT    | 11937 | A_95_P025171 TA17191_4097 |
| 12499 | 148 | 4  | 806  | TTGAGAGTTCTGATACCATTGACATGTCAAAGCAAGATCAGACAGAGGTATCCCGCC    | 11939 | A_95_P309023 FG167278     |
| 12501 | 148 | 6  | 622  | AATGCTCTTCTCCTCTTATATGGATAATGGGCAATTAAGATTGGATTCTTAGAGCCC    | 11943 | A_95_P091498 BP531384     |
| 12505 | 148 | 10 | 0    | GAGTACATCTCATGGTAAAATGTGCTGCAACTTTCGATGTTGTAATATCAAGTTTAAAC  | 11951 | A_95_P024101 A_95_P024101 |
| 12508 | 148 | 13 | 421  | GAAATTGCTAAGCGAGGATTAATCCAATTCAGGTCATACCGTCTCTCTCTCTTTTT     | 11957 | A_95_P060245 BP134948     |
| 12509 | 148 | 14 | 786  | TCTATATGGACTCCCTCTTACCAGCAAACCTTGTTGATACAAATTATATTCAAATCACCT | 11959 | A_95_P196957 EB429912     |
| 12510 | 148 | 15 | 418  | ACCCTCTTGTTGGAATTTTGAACACTTCCTTTCAGCTCAAAGCACTTATTTCTAGCTT   | 11961 | A_95_P022691 TA13685_4097 |
| 12512 | 148 | 17 | 600  | CAACACGCTGTATAAAGCATTCTGTTTTATGTAGAGTTCAAGAAACGACGCACTTGT    | 11965 | A_95_P216367 EH621105     |
| 12518 | 148 | 23 | 426  | AGATTATGGACCAAGCAAGCTCTGTTTATTTGGTTATTAATGGCTTTAGGATATGT     | 11977 | A_95_P132072 FG638602     |
| 12519 | 148 | 24 | 996  | GAGTAGCCGGCGACGTTTTATTATGCGTATGAATTGTCACCGTGTTTATGTGAATATC   | 11979 | A_95_P205757 TA18358_4097 |
| 12521 | 148 | 26 | 608  | CAGTCTAGAGAGCTGATTGGTGTATTCTTATTTCTTAAATCTAGATAACTGGTGA      | 11983 | A_95_P204447 TA18068_4097 |
| 12525 | 148 | 30 | 1391 | GTTGCTTATATTGCCCGTCGTAGATTCTTTTTGTTAAGTTATTTTAGTCTCTTGCTGC   | 11991 | A_95_P185712 TA13974_4097 |
| 12526 | 148 | 31 | 529  | CAGGCTCCGTTTAGAAAAACCAATTGGATTGGTAAGATATCTATGATTGCTATTCA     | 11993 | A_95_P020631 EB432836     |
| 12530 | 148 | 35 | 1679 | TCTATGAAGTAGGACGAGTGTCTACCTAATCAATGCTAGGTAACCAAGTTAGTATC     | 12001 | A_95_P176372 TA12737_4097 |
| 12534 | 148 | 39 | 337  | TCTTGAAGTTCTTGCAAGTGAAGGTGCAAATTATCTCGAGAGATCAATGGAAAAAAG    | 12008 | A_95_P087798 BP529881     |
| 12535 | 148 | 40 | 708  | ATGCTCCACTTCTTGTTAAAAACAAGGCAGCTGAAGTGTTGTTGGAAACATCAGAGI    | 12010 | A_95_P260511 EB425659     |
| 12540 | 148 | 45 | 841  | GTCTATGATCGAGCTCTTCAGACCGTAATTTTCATCATATGGATAGAATTTACCCAAA   | 12020 | A_95_P219297 DW003605     |
| 12543 | 148 | 48 | 348  | CCTTCTACTTCTAATTTCAAGAAACAAGAAGAAGGAGGAGGAGGAGGAGAAG/        | 12026 | A_95_P158097 EH616183     |
| 12544 | 148 | 49 | 633  | TAAGAAAAATCGAGATTTGGGGTTGAGATTTTGGGAACCTTGCCAGATTTTAAAG      | 12028 | A_95_P257539 FG643524     |
| 12547 | 148 | 52 | 278  | GTCCGGAGAGTTGAGGACAATATCTATGCGACTATGCCATTAATTTAATCAAACATA    | 12034 | A_95_P214317 TA20239_4097 |
| 12549 | 148 | 54 | 369  | TGGGCATTTTCTGAGCATGTTAGACTCTGTTCTTGAAAGAGACATGGTGCCTACAATC   | 12038 | A_95_P110337 CV019692     |
| 12551 | 148 | 56 | 579  | GATTAATGTGAGTGTAAGTCTGCTGCACCCCTACAGAATGAAGAAGAGTCAGAGG/     | 12042 | A_95_P307913 FG195867     |
| 12552 | 148 | 57 | 452  | TCTGCGTTTGTATCCACAAGAATAAGGGGAAAAAATTTCAAGATATCGTTCATGTTT    | 12044 | A_95_P137007 FS416181     |
| 12555 | 148 | 60 | 646  | GTTTCCCGATCAAGGACTGGACTTTAAGAGATTAATACATTTTGGAAAAATACGGTTI   | 12050 | A_95_P016806 EB443154     |
| 12556 | 148 | 61 | 513  | TTAGGGTTATTGGGTAAGTACTAGGCTTATCTGGGAAATTTGGGAAACTAGTTTTCTTCT | 12052 | A_95_P000101 FG167017     |
| 12561 | 148 | 66 | 343  | TCGCGCAAAACGGTAATATATCGCTTGATGATGTGATTGAGATTGCTAAAGATGATG    | 12062 | A_95_P102937 CV016268     |
| 12564 | 148 | 69 | 183  | CTATTTGTGAGGTCTCGGAAAGAAATGGACTATATTGTGACTTTTGGGAGAAATTCA    | 12068 | A_95_P091313 BP531296     |
| 12568 | 148 | 73 | 777  | TCCTGGAGAAGATGATACAAAGTCTGCAAGAATAGGGGAGAAGGGCTAGGATGCTTC    | 12076 | A_95_P136057 EB439617     |
| 12570 | 148 | 75 | 935  | GAACCTACGACGTGTCAAACTTTTTGTGTTGATTCTAAGTGACTAATTCTGTTGATAC   | 12080 | A_95_P011546 TA12287_4097 |
| 12573 | 148 | 78 | 298  | CCAAAATTTGGTTGTTATGGGCATGCTATATCAGTTTGGCACCATTTTATGTTGGCG    | 12086 | A_95_P155037 EG649867     |
| 12576 | 148 | 81 | 788  | TTGAGAGGTAGTCCGATGTAGAACCTCATTGGCCTATATCAAGAAATGAAGGGCTTT    | 12092 | A_95_P181352 DW005137     |
| 12582 | 149 | 2  | 756  | TATATTATGTTTAAAGACATGTGCTAGGAAGCTGGCCTGTGTTTTGGCTGCAACCGC    | 12102 | A_95_P195622 EB678692     |
| 12585 | 149 | 5  | 875  | TATTGTAAGTCTATAACAGTCAGAAGATGCGTTCTTGGCGTGGATGGTTCAGCCA      | 12108 | A_95_P229859 FG161194     |

|       |     |    |      |                                                             |       |                           |
|-------|-----|----|------|-------------------------------------------------------------|-------|---------------------------|
| 12587 | 149 | 7  | 450  | TATGCACTTGGGGTAGAACATTTACTTTTGTGGATATTATTAGCTTGTGGACGAGTT   | 12111 | A_95_P131647 TA18424_4097 |
| 12590 | 149 | 10 | 860  | TTCAACAAATCATATTTGGAGTACATTGTAGATAGTGCAGGTAAGTATTATGGCACTC  | 12117 | A_95_P268541 EB436962     |
| 12592 | 149 | 12 | 893  | CGTGGGATTCTATGGAAGAAGTACTGAAATGAAGAGTTTCTGTTGCTTTGATTTGT/   | 12121 | A_95_P009196 DV998963     |
| 12593 | 149 | 13 | 290  | TACTGGTTGACAATGGGTCTAGTGCGAACATTTGCCTCTCTCCACATTGAACAAGCT   | 12123 | A_95_P038021 BP129160     |
| 12594 | 149 | 14 | 436  | GAACATGGAAGATCATACTGGTCCGACTGACTGCAACAATTAATGATTTTGATTGAC   | 12125 | A_95_P211312 TA19583_4097 |
| 12596 | 149 | 16 | 309  | CTAAAGTGATTTCTAGAGCAGTTTTCCCAAGCCTGAACTTAGCATTGACGACATTTCT  | 12129 | A_95_P208482 TA18978_4097 |
| 12604 | 149 | 24 | 581  | AGAACAGCAAATGCAGATAGGCATGCTGGGAATATTCTTGTGAGCAGGGAAGGAG/    | 12145 | A_95_P128752 FG155230     |
| 12610 | 149 | 30 | 878  | CTTGACAGAGATCAAGGAAGGTAAGTGGAAAAGTGGCTTAGTTGTTGAAGGGATTG    | 12157 | A_95_P254064 EB424810     |
| 12613 | 149 | 33 | 734  | TATTTACTCATGAAAGGACTCATAACAGAGTAGATTAATAAATGGGTCGCCCCGGCC   | 12163 | A_95_P117882 DV160844     |
| 12616 | 149 | 36 | 591  | CGTTTGGCTGTGTTTATATAGTGCTTGAATTCACAGCAAATTGAGCAGAGTAGTTTAC  | 12169 | A_95_P122032 DW002099     |
| 12625 | 149 | 45 | 1231 | GATCCTTGTGGTTACTCCATGAATTTCTATTGAAGGAGCTGCACTTTCTACTATTCATG | 12187 | A_95_P018976 TA14024_4097 |
| 12628 | 149 | 48 | 114  | GTTAAAGTGGGCTTTAGTGACTGTTGTCCAATTTGGTATTGGTAAACGTTTTTATGTT  | 12192 | A_95_P127277 EB426804     |
| 12632 | 149 | 52 | 600  | GAATCTGTAGCTCAGGTTTGTTCCTTGCAACAAGAAATGAAGTTGGATTCAATTGT    | 12199 | A_95_P147797 EB643455     |
| 12633 | 149 | 53 | 472  | CAAGTGCAGATTAGTTCTCTCGATGAATTGAATTATTACGATGTTGCATCTTATGCAC  | 12201 | A_95_P162872 EH621868     |
| 12635 | 149 | 55 | 859  | CCGTGCCTAGTAGATACATATCAGCAAGGGATGTTCTTTCTGCTGTTACTCAGGGATT  | 12205 | A_95_P245922 FG158620     |
| 12638 | 149 | 58 | 647  | CTTTTTCAGCTATACGATCTCAAGCAACAAGGCTTTTCATTGAGAGGCAAGAGGTGA   | 12211 | A_95_P184487 TA13707_4097 |
| 12643 | 149 | 63 | 27   | TTCTGGACTATGTGAAGTTCTTAAGGCTTCAACGTTAAGGGTACTGAGCATGACGTA   | 12220 | A_95_P064985 BP136207     |
| 12644 | 149 | 64 | 753  | CAATGTGGCTAAATTTGTGGGATGTTATCGCGCATTTTTTGTAGTGTAGCATAAAAT   | 12222 | A_95_P023016 TA13495_4097 |
| 12645 | 149 | 65 | 248  | ATTTCTCTATAGTTGGCTACTTCAGAACCTATCAAAGGAGAAAAGGCTATTTTCAGAA  | 12224 | A_95_P155442 EG650068     |
| 12647 | 149 | 67 | 586  | GTTGAGACAGAAGGATGTAAGAAAGGGAGGTCATAAATTGGCAGTTTTGGTTCC      | 12228 | A_95_P216357 TA20688_4097 |
| 12649 | 149 | 69 | 556  | ACAACACTCGATTGGAGTGTTTTGTTTACCATGTAATGGATTTTGTGCAGTTTGATA   | 12232 | A_95_P018321 EB427220     |
| 12652 | 149 | 72 | 653  | CTAGCCCTGCCATCGTCGATCAGTTTTGTGAAAAGCAAATAGGAATATAAAGACTAA   | 12238 | A_95_P020611 TA21272_4097 |
| 12653 | 149 | 73 | 313  | TATGTAGTTTGTGATTCACGATGTTCCGGGTTTTGCTATTGCTTGTGTATGTTTGACC  | 12240 | A_95_P107917 CV018599     |
| 12663 | 149 | 83 | 605  | TTCTGCAGCTAATACTACCGGTTCTGAATGGTATTTGCTGGTGTTTATGTGGATGCC   | 12259 | A_95_P061770 BP135343     |
| 12677 | 150 | 12 | 1080 | GCAGATGATATGCCTTATTCCGTGTTTAGGTTAATTATCATCTTCTTGCAGAATAG/   | 12122 | A_95_P019291 TA17097_4097 |
| 12680 | 150 | 15 | 825  | ATTAATACCCAGTCAGAATTTGGTCTAAGTAACTCTTTGCTTGTACTTTCTTTACCC   | 12128 | A_95_P023651 EB438728     |
| 12683 | 150 | 18 | 742  | GGGGAGATTGTGGAAATTTAAAGCCTGATCAACTCTCTGAAGCTAAACATCCCACG    | 12134 | A_95_P286568 FG640162     |
| 12687 | 150 | 22 | 446  | ACTTTTGTACCAGCAGCTTGTGTTTTCGGCTCATCATGGACTGATTGGCACCGTGTAT  | 12142 | A_95_P153972 FS421124     |
| 12689 | 150 | 24 | 316  | CCCATCGAGTCCCCTGGTTCTAGCACAGTCTTTTTGACTATGTAAGGCTTAAATCA/   | 12146 | A_95_P141562 EB445262     |
| 12690 | 150 | 25 | 386  | TAATAATCTGCCGTCTGTGGGATCCTTTCAATTTCCATTAATTGTCACATTTCTAGT/  | 12148 | A_95_P186872 TA14221_4097 |
| 12696 | 150 | 31 | 750  | GCGGGGTTCTGCCGTGGTTTTGAAATACTTGAGTTTGGTATTTTCTGCATTTAAAA    | 12160 | A_95_P183227 TA13409_4097 |
| 12697 | 150 | 32 | 288  | CTTGTAGGCACTCTGTTTTGAAGTATTCAAGTTGTTGACATTTGACTTTGGTCAAA/   | 12162 | A_95_P108742 CV018985     |
| 12700 | 150 | 35 | 807  | AGGCCTGACGCCTTATACCATCTTGTACCTTTTTACTTTCTTCTCTGTCTGTACATT   | 12168 | A_95_P030426 EB681836     |
| 12701 | 150 | 36 | 466  | CATTGATGTCCGTCTCATATAGCTACTGTAAATTGATATGGCGGCCGTCAGGTGTA    | 12170 | A_95_P092608 BP531883     |

|       |     |    |      |                                                              |       |                           |
|-------|-----|----|------|--------------------------------------------------------------|-------|---------------------------|
| 12703 | 150 | 38 | 357  | ATCGTTGTGTAGAATTGGATCTCAGATGAGGGAGAGTGATTTGGTTGATTGGTTTGT    | 12174 | A_95_P127347 FG140084     |
| 12706 | 150 | 41 | 440  | GTGAGACATATGGACATTGTACTCCTATGTTTTATCTTTGTTCAACTAGCTCAGCTTAT  | 12180 | A_95_P123327 TA12982_4097 |
| 12707 | 150 | 42 | 543  | AATGTTTGCAGATCGGATGTCCATTTCAAAATGTTTGCTGTCTGTTTATCTTGCTTTT   | 12182 | A_95_P098533 BP534535     |
| 12713 | 150 | 48 | 780  | GGCTCAACATTGCAAATTGTGTATTATCAACACTTTGTTTGTTGCTGCAATTACTAC    | 12193 | A_95_P215372 TA20470_4097 |
| 12714 | 150 | 49 | 436  | CATTTTGGATTGAGGAACTTGAGAGGGCAAAGGGTTGATTGTTGAATGATCTTATTC    | 12195 | A_95_P194387 FG636318     |
| 12715 | 150 | 50 | 784  | AGGCAAAGGATTCTCAATTGAAGGGCATCCAGTTATTCGGAGTCTAGTCGAGATAA     | 12196 | A_95_P264191 EB450911     |
| 12719 | 150 | 54 | 807  | GTAACATCAGATTTCTCATCCTAAGCCTTGTTATTTCAATTTGTCATTGTGGGTCTCAT  | 12204 | A_95_P184817 DV162582     |
| 12723 | 150 | 58 | 709  | ATTCTGAACTCCTATTTAGAGGTAAAGGCATGCTTGTTCCAGGTGGGTGGTGCATTG    | 12212 | A_95_P192477 FG144933     |
| 12726 | 150 | 61 | 377  | ACTTTTGGGATGTCTCTATGGTGACTGAATGAGTTAGTATGGGGGACTTGCTCCTTTA   | 12218 | A_95_P111857 CV020401     |
| 12734 | 150 | 69 | 725  | CTCTTCTGTCTGTGCTGTGCAAATGATTTGAGTTAATTGAACCATGAATCCGTTTG     | 12233 | A_95_P213627 TA20089_4097 |
| 12736 | 150 | 71 | 865  | TAGAACGACATGTGCTGGGCATTGGACTGATGGAGCGCTGCTATGTTATTGATATC     | 12237 | A_95_P232864 FG158951     |
| 12737 | 150 | 72 | 296  | GACCCTTTCTTAGGCAGATACTATTGGGATACTGACCAAATGTATACTTGTATCC      | 12239 | A_95_P111272 CV020131     |
| 12738 | 150 | 73 | 264  | GCAGAACACCTCTTGATTATCTAATGCAAAATCAACGTGTAGAAGGAATAAAAA       | 12241 | A_95_P043716 BP130688     |
| 12739 | 150 | 74 | 452  | CTCTGTTACCTGCAGTAGTTACATTTTTCGTTTACCTTACCATATTGCACTTTATGTGCC | 12243 | A_95_P177072 TA11870_4097 |
| 12741 | 150 | 76 | 509  | AACCGCAATGCATCAGATCATCAGTTATATACCTAACCTTTATGTAACCTATTCTTTT   | 12247 | A_95_P035278 BP128427     |
| 12742 | 150 | 77 | 726  | CTTCTGCAGAACTTTTAGAACAGCTCAATTTGAGCGCTGGATAATATGTTATACCAG    | 12249 | A_95_P258381 DV157680     |
| 12744 | 150 | 79 | 1221 | CTTCTGTTGCGTAGAGTTTTGCAAAGAGAGTTAAAAATCATCCTGGATTTCAAAGTA    | 12252 | A_95_P028781 TA12612_4097 |
| 12747 | 150 | 82 | 909  | TTCCATGCCAATTTTTGGGGACAGATTATTTATTTAGTTGTCACGAATTTGCTGTTGAT  | 12258 | A_95_P199647 EB424807     |
| 12750 | 150 | 85 | 931  | GTTTATTAAGTCTTAATAGATACTTTGTTTCACTACGTTGCATCTTGCTGGAGATTC    | 12264 | A_95_P013056 EB680644     |
| 12751 | 151 | 1  | 833  | AGTTCGTCCTTTAAGTGCTGAGGAACTGTAAATGGAGCTGTTGAAGAACTGCACA      | 12265 | A_95_P200362 TA17192_4097 |
| 12752 | 151 | 2  | 787  | ACAAGTATAAGGACTCAGCTGATGGACTCTTTGGTAGTCTTGCAAGTAGAAATACAA    | 12267 | A_95_P267196 DV159037     |
| 12757 | 151 | 7  | 854  | GGACATAATTCACTAAAAGTTGCACGACTTTTGGAGAATACAAAAGCAAACATCC      | 12277 | A_95_P218227 EB425360     |
| 12760 | 151 | 10 | 492  | CTTGCTGTTGGTGTTCAAATTGCTATGTCACATTACGTGATTTAGAGGTCTGAATAAT   | 12283 | A_95_P260141 AM848538     |
| 12761 | 151 | 11 | 625  | GGGGAATTTGTTTGAATGTATCTTCTTAAGCTTTCTACGGTGCATGGTCCAGTTAT     | 12285 | A_95_P088658 BP530168     |
| 12764 | 151 | 14 | 414  | CGTCCTGCAGAATATGCAAGACAATAAGCTTAATGTAGTGAAGAATGATTTGGAT      | 12291 | A_95_P140662 EB444533     |
| 12765 | 151 | 15 | 854  | AAATTGATTGGAGGGTCTAGTGAAGGTGGTTCAGCTGTATTCAGACTGGATTACAA     | 12293 | A_95_P191142 DV161215     |
| 12767 | 151 | 17 | 430  | ATCGCCCCTTCTTCTTGGATTTTGGACAATTGACATTCTCTATAGCATTAATTAGTTC   | 12297 | A_95_P000856 EH621051     |
| 12772 | 151 | 22 | 773  | GCTTTCATGATAACACTTTTGGCTTGAGTAAGCGCGTGTCTGTCCACCAATATTTCAT   | 12307 | A_95_P022221 EB680374     |
| 12775 | 151 | 25 | 366  | TATTAATAGATCATGAGTAGGTGAATGAGGGCTGGAAGGAACGATTGGAAGGAG       | 12313 | A_95_P099143 BP534807     |
| 12776 | 151 | 26 | 907  | CCTGTGATTTCCATTTGCTTTAAAATAGGTATTTGCTCCACATTAAGGCGGAAACTC    | 12315 | A_95_P176432 Y09505       |
| 12779 | 151 | 29 | 824  | CGGGGAACAAGGTTTCAATTGCTGTGTCTCCTATTAATATAATTTGATTGAATAC      | 12321 | A_95_P030236 EB425650     |
| 12781 | 151 | 31 | 901  | GTTACCATGGTAGTTTACCACCCTTCTAGTTTCTACTTTTGTGGATTATATTTAA      | 12325 | A_95_P242187 EB679195     |
| 12782 | 151 | 32 | 838  | TGTTTTATGAGCATGTAAATACAATAACCCTCGTTGGGCTATTGATGATGGAATGGC    | 12327 | A_95_P304033 FG133447     |
| 12787 | 151 | 37 | 801  | GGTCATATCCTTGCCTAACAGGAAGAGGATAGTAATTCTTGTTTTCTGGCATTAA      | 12336 | A_95_P219812 EB448302     |

|       |     |    |      |                                                             |       |                           |
|-------|-----|----|------|-------------------------------------------------------------|-------|---------------------------|
| 12788 | 151 | 38 | 835  | CCTATGCCACAACTTTGTTCCCGGAAAGTGAATTTAACAAAACCTTGATCTCTAATTTI | 12337 | A_95_P260071 X52744       |
| 12790 | 151 | 40 | 241  | TGTGGATTAGGATTACTTCGTCTTTTTGAGTCCGGTAATGTAATTCTCCGTTACATAT  | 12341 | A_95_P003921 TA13010_4097 |
| 12793 | 151 | 43 | 764  | TAATCCTGAAAATGACGGTTGTATCAATGCAGTTCTCCTCGTGTAGTACCTTTTAGTA  | 12347 | A_95_P237179 EB677494     |
| 12794 | 151 | 44 | 820  | TCTCATTTATACCCATGGTAAGGTCTGTAGGGAATGCTCGGGAAAAGTTTCTGACAA   | 12349 | A_95_P117727 DV160677     |
| 12797 | 151 | 47 | 747  | TCTAATCGCGCATCTTCTAGGGCAATTCCTGATCAACCATATGCTGATAATCACAGTG  | 12355 | A_95_P150247 EB680334     |
| 12798 | 151 | 48 | 197  | CCACTGTTTTGTTGTTGGTGATGGTATTTCTAGACTTATTTTAGACTTTGGTAGCTGC  | 12357 | A_95_P089773 BP530648     |
| 12799 | 151 | 49 | 563  | ATGATTAACACAAAGATGACGTGGGCTCATCCAGTGAATCTTGACAAGGGAGATG/    | 12359 | A_95_P159557 DV157557     |
| 12803 | 151 | 53 | 789  | GTGGTCTTCTGCAACAGAATGGGTTCAAATGTCTTAAAATATATGTAACCTCAGGACC  | 12366 | A_95_P159772 TA13182_4097 |
| 12822 | 151 | 72 | 903  | CTGCTTGAAGTGTTCTTTTTCATACAGTGTCTTCTGTTTCTTGCAAATAAAAGCGTA   | 12404 | A_95_P180652 EB678678     |
| 12830 | 151 | 80 | 703  | TACAGAAGACCTTGCTTGTTCATGCCGAAGTGCTACTAGATCATGATGGGAAACTG/   | 12420 | A_95_P138807 EB440641     |
| 12831 | 151 | 81 | 608  | GACGAAAATTGTGTGGATATAACTGTGGGCTTGCTTTTATTTAAATGGAGTATGTTTC  | 12422 | A_95_P003891 EB444373     |
| 12835 | 151 | 85 | 1584 | TAGAGACTAGTGTGGAAATGCGAGCCCGATACAAGCTTATGAAATAAAACAAGTGT/   | 12430 | A_95_P031116 TA13207_4097 |
| 12836 | 152 | 1  | 905  | ACCAGCTTACGTGTACCTAAACTAGCTTTGGTGGCTATTATATTTTGTCTATGCTGTTG | 12266 | A_95_P208912 EB678190     |
| 12843 | 152 | 8  | 2319 | CTTTGGCTCTACAACTAGTGAATCGTCCGAGAAAGAGAATGAAATGTCCAAACGC     | 12280 | A_95_P221527 AB454418     |
| 12844 | 152 | 9  | 769  | GCACATGAAGTATCACCTGATGATGAAACTATTGCGGATGTTTTAAGGATTGGTTAT   | 12282 | A_95_P139297 EB443026     |
| 12845 | 152 | 10 | 348  | GTCGGATCTTGGTGGAAACACTTGAATCGTTCAGTCGTTGAAGTCCATTCTGCTTCT   | 12284 | A_95_P067360 BP136851     |
| 12846 | 152 | 11 | 1180 | ACGATATTGTAACCCCTGCCTGATCTGATTAAGTTTGTGGCTTCTATGTGTTCA      | 12286 | A_95_P183367 TA13442_4097 |
| 12850 | 152 | 15 | 753  | TTATAGGATGCTTATGCTTTTGCCTGCTGGGGCAGAGGGTGGTGTATAGAGAAAT/    | 12294 | A_95_P291903 EB425366     |
| 12851 | 152 | 16 | 1259 | CACACGACAGATCTATTTAGGCATTTTATTTTATACCAGTAGCTATGTCAAACCTAGA  | 12296 | A_95_P190742 Y11209       |
| 12852 | 152 | 17 | 896  | CTGCCATAACTTTTACCAGGAAAATATTGTGAAATCACAACTACTAATATCGACTTC   | 12298 | A_95_P011046 EB426682     |
| 12853 | 152 | 18 | 320  | GTTCTCAATTGTATGTAGGTGAAAGCTAGTAGTTCTGATGAGATACAAAATCTGATC   | 12300 | A_95_P139977 EB443917     |
| 12855 | 152 | 20 | 451  | TGACAATCTTTTGTCTGCAGTATTGCATGAAAATTGTCTGAGCTTAACTAAATAGCATT | 12304 | A_95_P273596 AM822174     |
| 12856 | 152 | 21 | 863  | ATTACTTGGCTGTACAGAAGCTCCTCTACACACAAGGACTCAGCTCTTACCAAGTTT   | 12306 | A_95_P229114 DV161644     |
| 12860 | 152 | 25 | 785  | AATTACACATTAGATAGCTTTGCCAGAATAGGACTAGAGTTTCTCAGTCCACATGCT   | 12314 | A_95_P285483 EB448976     |
| 12862 | 152 | 27 | 706  | CATTATCGGGTTAAGCCCTTTTATCTTGAGACTAGTTCAGCTCTTACATTTTGAAC    | 12318 | A_95_P100913 DV160879     |
| 12866 | 152 | 31 | 795  | TTTGGTTTATGTTCTGTTTGGACCTGCTTTTAGTCGTTGTATTGAAGATTTTGTGGC   | 12326 | A_95_P272531 TA12360_4097 |
| 12867 | 152 | 32 | 255  | ATCCAGGATTTGAACCTTATTGGTTCAAGTTCGGAATGCTACAAGTCTACTACAAC    | 12328 | A_95_P089343 BP530461     |
| 12869 | 152 | 34 | 548  | TCATGCACTGATGTATTAGTTCTGTTGTTTCAAGTGGAGTTCTAACTTTTGGTTTGTG  | 12332 | A_95_P147952 FG625361     |
| 12874 | 152 | 39 | 706  | TGGCAGACTAGCCATGTTCTCTATGTACGGATACTTTGTCCAAGCCATTGTTACCGGA  | 12340 | A_95_P002581 TA11665_4097 |
| 12877 | 152 | 42 | 699  | CCAAATTCTGACACACTCTTTCGCTTCTCTATTTCTGATGATGAATTGTGATGATTTGC | 12346 | A_95_P206792 DV157565     |
| 12878 | 152 | 43 | 108  | GTGTAICTGAATAAACTATTCTCTGGTTTCAGGTGCAATGAAAATTAGTAGGTCTAAT  | 12348 | A_95_P116662 DV159431     |
| 12880 | 152 | 45 | 318  | CATTGGTATCGTGGAGGATAGTCATCGTAAAAATTCTTAGGTATTTTCTCTGTGGGC   | 12352 | A_95_P101393 CN498817     |
| 12882 | 152 | 47 | 114  | AATGAAGGGACACTCTGACCTTCTCACTGTTTCTCGATTCCACAACAAACAAACACCAC | 12356 | A_95_P104312 CV016936     |
| 12883 | 152 | 48 | 699  | CTGGATTGGATCTCTAATGCCTCATCGATTTATCAGCATTTATGAGCAGGTTGCGC    | 12358 | A_95_P159787 EH618241     |

|       |     |    |      |                                                              |       |                           |
|-------|-----|----|------|--------------------------------------------------------------|-------|---------------------------|
| 12889 | 152 | 54 | 584  | GTGGCTCTATTGTTGTCTGTTTAACTGCAGCACACATTTGTTTCAACTTCAGTTTCATT  | 12369 | A_95_P122147 DW002185     |
| 12891 | 152 | 56 | 618  | GCAGATGATAAGTATATACTTTATGTTTGTTCGCCGATCAAGGACTGGACTTTAAGAC   | 12373 | A_95_P188997 EB443154     |
| 12894 | 152 | 59 | 534  | CTATGGACTTGTGGTATGGATTCTTTGGCATTGTACATGGAGCATTTCATTGGGTTG    | 12379 | A_95_P044566 BP130915     |
| 12896 | 152 | 61 | 783  | TAATTGATACAAATAGCCCATCAACGACGACTCTATTAAGGGCTAAATTCTCTGAATT   | 12383 | A_95_P256454 EB449193     |
| 12898 | 152 | 63 | 1333 | AATGGACTTGGACAAGGATGATGGTGGAAAGACCGAAGAAAAGTCATCCTAATGGA     | 12387 | A_95_P198202 TA16727_4097 |
| 12899 | 152 | 64 | 653  | ACTACTTCAATTAGGAAACCTATAGGTGCAAAGAAATCTGGGAAGCCAGGTGGTGG     | 12389 | A_95_P138337 EB442079     |
| 12900 | 152 | 65 | 181  | GCATATAAGCGAATGTGTCCCTGATTGAAGTCAAAGTATTTGACCATAGTAAAACTC    | 12391 | A_95_P095723 BP533306     |
| 12902 | 152 | 67 | 663  | CTTCACATTAGAAATGCCTTGTATATATGTGTATCAGCCTATCAGGTAGATGTGCTAG   | 12395 | A_95_P260191 BP129638     |
| 12903 | 152 | 68 | 836  | CAAGGTTTATGTGTTGTTTTAGTTGTTAAGCTTGTAGTCTGCCGGATGATATTTTC     | 12397 | A_95_P227214 DV160739     |
| 12908 | 152 | 73 | 692  | AGGTTGGTTTAGATGACGATGACAACGATGATGATAATTCATCTCACACACCTACAA    | 12407 | A_95_P140002 EB443948     |
| 12910 | 152 | 75 | 736  | AATGTGTAGGTGTTCTATCTCTGTTTAAAATGCAAGTGAATGCTACTAGTGTCCAG     | 12411 | A_95_P018936 TA15542_4097 |
| 12913 | 152 | 78 | 388  | CATCTTACTGTTTTCGTCTAAGGATGTCGTCAAGGTAGTCTTATCATTACAGCTTTCAGC | 12417 | A_95_P205212 TA18231_4097 |
| 12917 | 152 | 82 | 336  | TGTCGAACCCACAGAGACTTGTATCAACTATCCACTAAATTTACCAAGATTGTTATTC   | 12425 | A_95_P099628 BP535004     |
| 12918 | 152 | 83 | 887  | TGGTCATCTGATGGAAGTAAGGTAACAGCTGGGAGTTCTGATCGCATGGTTTATATC    | 12427 | A_95_P206472 DV157626     |
| 12921 | 153 | 1  | 817  | AGAACTTCCTTGGGGTGCTTTGGATGATGTTGTGATGGGTGGAGTGAGTCAAAGTA     | 12431 | A_95_P205682 DW001357     |
| 12924 | 153 | 4  | 743  | TAGTCAAGAGTGCAAATCTAAAGACCCCTGAGGTTTCACTTTTTACAGCCTTTTTCAA   | 12437 | A_95_P316243 FG187377     |
| 12926 | 153 | 6  | 420  | GGATTCCGACAGAACTATCAGAGACCTTCGTCCAATTTACCAAGATCAGGAACATT     | 12441 | A_95_P086165 BP529467     |
| 12931 | 153 | 11 | 762  | GACAACAAAGGATTTATGTGAGAGGTTCTGTGTTATTTTATGTACACCTTCAAATTA    | 12451 | A_95_P183212 X95752       |
| 12933 | 153 | 13 | 698  | TTTCGAGAGGTCGTTTGAGTTGAGCTTTCCTGACATCGAGCTCTGATTGAGGTGTTTC   | 12455 | A_95_P160532 EH619215     |
| 12934 | 153 | 14 | 930  | GTGCATCTGCTTCCCTCTGCCTCTTTGTAACCTTAAATTTGTTCAAATGAACTGTTATGT | 12457 | A_95_P013631 DV999488     |
| 12937 | 153 | 17 | 795  | AAGACAACATTCTGCTGAGGTTTCAATTCTTCAACCCCTTGTCTATTGTTTTGTCTA    | 12463 | A_95_P116187 DV158763     |
| 12942 | 153 | 22 | 501  | AAGGAGGATCTCAACATTTCTGAAGGATTTCAATCATTCTAAGAGTATATATCCTC     | 12473 | A_95_P219592 TA21428_4097 |
| 12947 | 153 | 27 | 484  | ATGACCTATTGCAGTTGTCTTTGTTGTGTCTGCTGCTTTTTATGTGAAAATTTTTCGG   | 12483 | A_95_P164452 EH623701     |
| 12951 | 153 | 31 | 881  | GACACATTCCTTTGATATACATGGTGGTGGAAATGGACTTGACTTTTCTCACCATGAA   | 12491 | A_95_P118712 DV161777     |
| 12959 | 153 | 39 | 603  | GGCTGCAAGGCCATGTACCATTAATTTAGACTTTCCTTCACGCAGTGTAACAAACAAG   | 12507 | A_95_P222972 TA22146_4097 |
| 12961 | 153 | 41 | 374  | TTAACTATGGAGACTTCAGAGCAGAGATTAAGTCTGTGTATGCCAAGAATCCTTCA     | 12511 | A_95_P080545 FG141460     |
| 12966 | 153 | 46 | 749  | GTTGGGATTTTTCCCGAGATATTCTTGAGTCTATTGACTCTAATCTTTTTCCACTG     | 12521 | A_95_P029106 EB425632     |
| 12967 | 153 | 47 | 806  | TATTGTAGATAGCATGGTGTTCATGACTAGCTAGAAGAATGAAGAAAGCGATATTC     | 12523 | A_95_P214617 TA20300_4097 |
| 12969 | 153 | 49 | 167  | TCTGAGTTTGGTGTCTGTCTCGACTCTCATGTATGATTGATGATGGATATTCGGTT     | 12527 | A_95_P142382 EB445861     |
| 12972 | 153 | 52 | 2185 | TCATTATGTTAGTGTGAAAATGTAGGGAGCTCTGCAGCCTAAAAGCTTAATAAGCT     | 12533 | A_95_P259856 TA12447_4097 |
| 12974 | 153 | 54 | 783  | ACATATGATGATAATGCCATTAATAATGCTGTTGACATTTATAACACTGCCAGTGGCG   | 12537 | A_95_P127287 EB426811     |
| 12978 | 153 | 58 | 806  | TGGCTATCCCTTACAATTACAAACGCTATCATTAAAGATTTTCTGATCTTGAAGGGCC   | 12545 | A_95_P258952 EB429556     |
| 12984 | 153 | 64 | 651  | GTGGTGACAAAAGGTTGCTCTTTGGCTACAGATAACGAAGAGTTAAAATCTCTGAT     | 12557 | A_95_P153282 EB683555     |
| 12985 | 153 | 65 | 964  | GTCCAAGGAAAACCTATTGCAGATTGTGTCAAAGCAGGGTGTATGCATCGAATGTC     | 12559 | A_95_P146147 AY695053     |

|       |     |    |      |                                                             |       |                           |
|-------|-----|----|------|-------------------------------------------------------------|-------|---------------------------|
| 12987 | 153 | 67 | 695  | CCATTTTCAAGAATCAAGACTCATTTTTGGACAAATAGAATACTCTCTCTCTCTCTC   | 12563 | A_95_P016906 DW004524     |
| 12989 | 153 | 69 | 119  | ACTATGAGCACAATCAATAACCTTTTCGAGATGTCCTTCCAGGTGCTTGTATGCAG    | 12567 | A_95_P034354 AJ718525     |
| 12992 | 153 | 72 | 749  | TCTTTCTGATATTGGAGTACGTCGTGATGTCACGAAGATCCCTGTTGAGAGACTTGTC  | 12573 | A_95_P012731 FG159939     |
| 12994 | 153 | 74 | 722  | TCTTATGTGCACCTATTTCTTGCCTGTTATGCTTGTGTAATTTAGATGCGTTG       | 12577 | A_95_P296493 FG645393     |
| 12997 | 153 | 77 | 681  | TTATCTACTGTCTCGTTTGTGATGAAGTTCAATTTTGTGATGCCGTTGATGGTTTTG   | 12583 | A_95_P183402 DV158478     |
| 12998 | 153 | 78 | 851  | CCAATCTTTTGCCCAACTTGTGTGTAATATCTTTACAGATTATCTGAAGACTTCACT   | 12585 | A_95_P267396 DV159937     |
| 12999 | 153 | 79 | 520  | TGGCAAAGCTCAGAGTTTATAATAACATACCTCTCAAGTACAACCTCTGTGTTTCACT  | 12587 | A_95_P152862 EB683192     |
| 13002 | 153 | 82 | 1503 | CCGGACACAAACAACCTCTTTTGTCTTGTGTTTCTTATCTAATGAGAAATGCCGTA    | 12593 | A_95_P177242 TA11920_4097 |
| 13003 | 153 | 83 | 1624 | TGTTTTGTACTTTGCTGTGTGCATTGCATAATATGAGGGAAATAGGGAGGGTCCGA    | 12595 | A_95_P217077 AB014484     |
| 13006 | 154 | 1  | 802  | TTAATCAGGAAGCATGCGGAAGTGGTTCAGATGATGATGCTGCTTTCGAGTCTT      | 12432 | A_95_P228939 DV161110     |
| 13009 | 154 | 4  | 830  | AAGACAGGAGCAAGCTGCGGAAAATGGAATTATCCACACTTGATGCATTTTATCAT    | 12438 | A_95_P297273 EB682598     |
| 13017 | 154 | 12 | 829  | GGAAATACAGAATCAAATATTCTATACAACGGTCTGTTCTTGTCTTCTTAGTTTCATCC | 12454 | A_95_P127317 EB426843     |
| 13019 | 154 | 14 | 826  | TACCTCTGTTGTTGGGGGGTTAGCTGACAATGACATGTTTGGACATAGTTTGTGT     | 12458 | A_95_P021036 TA15464_4097 |
| 13026 | 154 | 21 | 41   | GGTATCCGAAGCTCATGTACTTTGCGTTACGCAACTTCTTAAACATAGGCTGAGC     | 12472 | A_95_P153437 BP129154     |
| 13027 | 154 | 22 | 564  | CCTGGCTGCAGGAATTTGATTAGCCAATTTAGTGGGGAATTGCTTATTAATTATT     | 12474 | A_95_P035903 BP128595     |
| 13028 | 154 | 23 | 526  | CTGGACCAGAAATGCAGCATCTTATATTCTAGCTTTATTTCTGTATTTGTTGTTCTC   | 12476 | A_95_P124042 DW003889     |
| 13033 | 154 | 28 | 597  | CAGTCTGTGTTACTCTTCTAGCATTTTCTTTGATCAGCCTTTGAATTTGCAGCTGT    | 12486 | A_95_P288283 FG641025     |
| 13034 | 154 | 29 | 424  | GATGCTAAACATGTATCGAATACTATTATCCAAGTAATAAACAGTTAACGTACCCCG   | 12488 | A_95_P218032 TA21082_4097 |
| 13035 | 154 | 30 | 423  | GTTAGAAGAGATGGAAAGGTTTGTCTTGGGTACAAATTGTATCTGAATGAGATGCC    | 12490 | A_95_P210897 TA19493_4097 |
| 13044 | 154 | 39 | 838  | GGGTAAAGAAGTTATGATGAAAGGGTTTATGGTAGGTTTCAATTATAACCACTTTGA   | 12508 | A_95_P135507 EB438993     |
| 13046 | 154 | 41 | 551  | AGGAATTACAACCTGATGAGGAATTCTCTACATTTTTTGTGAAGCGGGCACTTCTGTT  | 12512 | A_95_P031196 BP133364     |
| 13051 | 154 | 46 | 2742 | TTCAATCCTTCTGGTTAGTGTGAGCATCCAGGCAGTGAAGTTGAAGGTTTCTGCTT    | 12522 | A_95_P025971 AB117525     |
| 13055 | 154 | 50 | 1160 | GGCTGCAGTTTGAAGCAATCCCCTGATTATCTCTATATGTGATTCCATTCTTTATGACT | 12530 | A_95_P010246 TA15744_4097 |
| 13062 | 154 | 57 | 1494 | CCCTTAGATGTTGAAGCTTATTGGAGTGGTCCAATCATTAGCTTTATAGCTCTCA     | 12544 | A_95_P207082 TA18663_4097 |
| 13067 | 154 | 62 | 790  | AGTTCAAAGAAGAAGTCACTTCTCCAAGTGGGTTTTTCGGCTATCGTTAACGACCGTC  | 12554 | A_95_P283463 EU123523     |
| 13068 | 154 | 63 | 202  | GATGCTTCTCAGGATAATGAGAAACGGAATGGTGAAAATCCAATATTTCTTCTTAC    | 12556 | A_95_P079375 BP527745     |
| 13072 | 154 | 67 | 122  | AGAACCTGGTCTAGCACTATCAACAATGTGTGTGAGGCTGTGAAATGTGTTGTGGT    | 12564 | A_95_P001846 AJ718660     |
| 13074 | 154 | 69 | 818  | ATGTTTCAAATTCATCGACCTAGACACACCCCTTCTGTTGGCAGAGGATCCAGTTTT   | 12568 | A_95_P245007 DV159814     |
| 13075 | 154 | 70 | 1188 | AATGTGACCATTGCTGCCAAGCTTGCAGGAATTTCTGGTGATCCGTTTACTGGAATTT  | 12570 | A_95_P190172 TA14953_4097 |
| 13078 | 154 | 73 | 321  | GTATATATTTACATCTTTAGGGTCCCAGCATGTTCTTATTTGATGTTTGTGTTGGA    | 12576 | A_95_P129567 EB429551     |
| 13082 | 154 | 77 | 402  | TAGACAGCACTGAATCCATGGTATGGATCAAATCATCAAATACACTGTCTAGAATCTC  | 12584 | A_95_P111097 EH617567     |
| 13084 | 154 | 79 | 615  | CAACTAATGCTTATCGGTGCAGTCAGTGTATAATTTCTGTGGATACATTGTATA      | 12588 | A_95_P108777 EB424839     |
| 13089 | 154 | 84 | 897  | TGGAGTTGATCTACAAGCATGCAGTCCCAAAGCCTAAAAATGAGTGCAGCAAATCTA   | 12598 | A_95_P009631 TA12329_4097 |
| 13090 | 154 | 85 | 383  | ATATTATGGTGGATGTCTACTCTTCTCCATGATCTTCATGTCAAATGCTTAATGACAT  | 12600 | A_95_P161237 EH619980     |

|       |     |    |      |                                                              |       |                           |
|-------|-----|----|------|--------------------------------------------------------------|-------|---------------------------|
| 13091 | 155 | 1  | 786  | TTGGGTCGGTGGCTTCATGATCTTCTTATGCCTCAGCTTCATCACCTACCACTATATCA  | 12601 | A_95_P219447 EB425891     |
| 13094 | 155 | 4  | 1666 | GGGCCATTCAAGTATATCTTAGTGCTTTTGTATTTTACTGTTTCTACAACACTTGTGA   | 12607 | A_95_P132347 TA12710_4097 |
| 13095 | 155 | 5  | 398  | TGAGCTTTGAGCAATTAACATGAGATGCTCTTATCTGACTCTTGATTCTGTTACA      | 12609 | A_95_P287558 FG634597     |
| 13098 | 155 | 8  | 404  | CCACGCATTCCCTTTGTCCATTGTGCAATTCTTATGTATCTCGCCATTACCTGTTAA    | 12615 | A_95_P256804 EH621028     |
| 13099 | 155 | 9  | 478  | GAAATGTCGGCTGTGTGACCTTACCTATGCGGCTCCAATTTATGTCGATATCGAATAC   | 12616 | A_95_P085395 BP529269     |
| 13102 | 155 | 12 | 578  | GCTGTTGTATCTCCTTTTCCACCTTCTGATAAAAATTGGAATAAACTCTGTACAAAGGG  | 12622 | A_95_P128072 FG160326     |
| 13105 | 155 | 15 | 1208 | ATGTTGTTTCTCATGTAATCCTCCTTGAGCTTTTGAATTTACCAGGAATACTTATTCTCG | 12628 | A_95_P020756 TA14528_4097 |
| 13106 | 155 | 16 | 132  | ATTAAGTTGACGGGCCCTGCTCCCGCCATAGTTGATAATGACACAGATGTTATTACTC   | 12630 | A_95_P110927 CV019970     |
| 13108 | 155 | 18 | 474  | TGTACATATGTTGTTGTCTGTCATCTTTGTAACCTGTATCTGACATGTGCAACAAAAT   | 12634 | A_95_P004151 EB683227     |
| 13111 | 155 | 21 | 840  | ATCACTAGATGTAGCTACTGTTTACAGGGGCAGAACAGTTTTTTCAGTGTGCTGAT     | 12640 | A_95_P137957 EB441679     |
| 13115 | 155 | 25 | 304  | TAGTACTGCCTTGGCACTATACAGAGTGCTTATCTGCTGGAAGTTGAATATGGGACA    | 12648 | A_95_P113067 FS429988     |
| 13116 | 155 | 26 | 1217 | CCTAGAGCTTGTGTAATCCTTGTGGCTTTTGGTTACATGGTGTGCTTGCCTGGATTAG   | 12650 | A_95_P004341 AY748245     |
| 13119 | 155 | 29 | 768  | TTCATTCTGGGTCTAGTATAGTTGCTTGTATGCTACTCCCTCAACTGTTGTTGCTGCGT  | 12656 | A_95_P258291 EB440265     |
| 13129 | 155 | 39 | 876  | GTTGCAGATGGAGTACTGGTTTACATGATTGGAATAGAAATAGTGATATGGTCATT     | 12676 | A_95_P205512 DV999401     |
| 13132 | 155 | 42 | 2007 | AGAAGTAATGGGTCGGGACAAAATGAACCTAGTTCACCCCTCATGATGAAAATATC     | 12682 | A_95_P240324 DQ156499     |
| 13143 | 155 | 53 | 731  | TAATACCGCTACAAGGATGTGGTACAAGTGAAGCTTTTTCAGCTACTGAATGATCGCT   | 12704 | A_95_P227154 EB446517     |
| 13148 | 155 | 58 | 634  | CTAACTGTTGAGTACATAGATCTGGATTCGTTAATGGCGCATTGTATTGAATTTAAG    | 12714 | A_95_P274198 FG636122     |
| 13154 | 155 | 64 | 1033 | ACCATTGTGTATGTTAGTTTGTGTTGATTTCCGTAATGACTAATGAGTATGTTGTGT    | 12726 | A_95_P212357 TA19817_4097 |
| 13156 | 155 | 66 | 759  | GCGATTAACATGCACTATTTATTTGTCTGGTGTTCATTTATCACCTATCGATTACTGC   | 12730 | A_95_P029166 EB425809     |
| 13159 | 155 | 69 | 378  | TTAGCTTGGCTAGTGACTTAAGTTGATAGTTTTCTGAATGTAGACTGAACTCCCTTTT   | 12736 | A_95_P187647 TA14393_4097 |
| 13165 | 155 | 75 | 431  | GTATCTTTTTGCTTTGACTCATTGAAAAGGGGAAGTGGTACCAATTGCAGTTCTTGCA   | 12748 | A_95_P244042 FS407121     |
| 13169 | 155 | 79 | 203  | ATTTCTGAAAGTGGGTTGTAGGAGTTATTGCACAGCGACCTGGAATCCAGTTAGGAA    | 12756 | A_95_P158422 EH616387     |
| 13171 | 155 | 81 | 652  | GTCTTCTTTAACACGTCTCTCAATTATTCTTTTCAGCTGGCCGTTCTATTGGATTGATT  | 12760 | A_95_P037358 BP128982     |
| 13173 | 155 | 83 | 691  | GGAAATGAGAACAACTCTAGTGACGACTCCAATTCTGCAGCAGAAACCAATGAAGC     | 12764 | A_95_P152482 EB682795     |
| 13174 | 155 | 84 | 394  | CATGTGTCTCAGACTTGGTCTACGGATTTTTTTCGAATATTTTCCAAAACATGTAATGC  | 12766 | A_95_P094328 BP532669     |
| 13176 | 156 | 1  | 446  | TTCTGCTCTCCGTCAACGTTGTGCTGCTATACAGAGGATAAAGAAAGACTTAGTTTT    | 12602 | A_95_P205228 TA18234_4097 |
| 13181 | 156 | 6  | 445  | CAAAAATTGAAGGATGTGGGAAGATTTTCTGAAAATGACTTCTGGCAAGGTAGTCA     | 12612 | A_95_P081540 BP528281     |
| 13182 | 156 | 7  | 482  | CAACTTTGGTGTGTTGCCTTGTGTGCATGTTTCTTTGACTCCTGGTTAATACTATCTTT  | 12614 | A_95_P121672 DW001786     |
| 13186 | 156 | 11 | 151  | GAGCATACTGGTTTTGAACAATGCTTGACATTATTGCTTTCAAGTATATAAGTTTTGG   | 12621 | A_95_P161697 EH620348     |
| 13188 | 156 | 13 | 905  | GCTTCCCTCCTGGGATTTAGGCTTGTGTTGATTGATTCTAGTGAACCTTCAATTTTA    | 12625 | A_95_P211747 TA19681_4097 |
| 13189 | 156 | 14 | 551  | AGGGAACCCAGTCCACCAAGCAGAAGTAATGGATTTCAAACCTGTGTCATAGATGTC    | 12627 | A_95_P066890 BP136717     |
| 13192 | 156 | 17 | 747  | CACTCCAGTATAAAAAATGGAGAAAATTATAGGGCTTAATCATGTTAGTTTAGTGGTTG  | 12633 | A_95_P131287 EB431445     |
| 13199 | 156 | 24 | 388  | GATGGGGACTCAGAAAGCTTCTATTTTCAGTTTGATATTATTTCCAATAAGTATATCAG  | 12647 | A_95_P220432 TA21606_4097 |
| 13202 | 156 | 27 | 464  | TGGAACAATTTTCCCAACGTGACATGTCCAGATCTTACTTCTATTTTAAATCAAGCTGA  | 12653 | A_95_P020706 FS389605     |



|       |     |    |      |                                                             |       |              |              |
|-------|-----|----|------|-------------------------------------------------------------|-------|--------------|--------------|
| 13212 | 156 | 37 | 175  | CCGGTATTTTGTGATTCTGGATTGTATTGGTCATAACCTGCATCGTTAATTTTATGATC | 12673 | A_95_P140472 | EB444360     |
| 13213 | 156 | 38 | 844  | CTATTTTGTCTTTACATACAGGTAGCTCAGTTGATTCTCCCTTTTGGATCAATGTGTAA | 12675 | A_95_P229539 | DV160249     |
| 13215 | 156 | 40 | 726  | TTTATGCCCCATGAATTTGACATCCTCTCTATTTGAAGAAATCATATCAGCCAGGAGA  | 12679 | A_95_P125637 | EB424731     |
| 13217 | 156 | 42 | 0    | CAACATTAGGTGCAAGAGTGATCTTATCTTGTGCTTCTTTCCCTGATGCTGGCTCATA  | 12683 | A_95_P314978 | A_95_P314978 |
| 13220 | 156 | 45 | 96   | GTCAATGGATGATGGACTTAAGTGGAGATATGGATTCCATTGATGGATGAGATGGA    | 12689 | A_95_P113512 | CV021168     |
| 13223 | 156 | 48 | 820  | TGCACCTTGAAGAGGACGATACAATTGCTACTGTCTTGTAAAGTCGTCCTA         | 12695 | A_95_P228244 | EB449537     |
| 13231 | 156 | 56 | 905  | TGTCTCTTGCTCAAATGGGGATTCCAATGCACCTCATTTTTGCAAAGCACCGCTTCATC | 12711 | A_95_P116557 | DV159314     |
| 13234 | 156 | 59 | 573  | CCCCACCACACCTTCTGTTAAAGCTTGTGATTGTTTTCAGAGAGATTGCTATACATTTA | 12717 | A_95_P192482 | EH615132     |
| 13238 | 156 | 63 | 582  | CCAAGTGCATATCTGATGAAACAATGAAGACGTAAAACGCAGATGCTTTCCCTCATT   | 12725 | A_95_P066770 | BP136685     |
| 13242 | 156 | 67 | 424  | CTATTGGCACCTATGAAAGTTCCTTTGTAATGTTACTGTTTGTCTAAGTGGAAATTTT  | 12733 | A_95_P133197 | EB434494     |
| 13243 | 156 | 68 | 522  | TTTTTGTGTCCCTCCTCATCTCTACTTTTTAGAGCCAAAGTGCTTGAATCAGTTGG    | 12735 | A_95_P300998 | FG641516     |
| 13248 | 156 | 73 | 865  | TATCATGGGAGGATTTACCAAGTCTTTCTTTCCGGTGAATAAGAATATTGCGACT     | 12745 | A_95_P232439 | EB426018     |
| 13250 | 156 | 75 | 338  | CACTAATTGCCAAAAGGAAGTCTCTTTCTTGGGGAAGTTCGAAGAAGTGCTGGAAGC   | 12749 | A_95_P207597 | TA18775_4097 |
| 13254 | 156 | 79 | 1656 | CAAGGGCATTTTAAGTCTGTGAGATACCTGTCTATAATGCTGTACAGTCTATTTGCTA  | 12757 | A_95_P265351 | TC50731      |
| 13256 | 156 | 81 | 846  | GGCTTCAAGTTTAGGTAGCTTGTAGTTTGTATTCTGTAAATTAATCATGCTTGCTCT   | 12761 | A_95_P149887 | EB679882     |
| 13257 | 156 | 82 | 690  | AGCATCCGGGCCATCAAGACGGAAAATTGTTTTCCATATACCTGAAGGAACCATAT    | 12763 | A_95_P309053 | FG184306     |
| 13261 | 157 | 1  | 739  | ACAGCTACCTGTTCTATTTTACTGATGCAACTGTCTGTTGATTACAGATGCAGTAA    | 12770 | A_95_P246632 | EH622517     |
| 13267 | 157 | 7  | 451  | AAGCCTTGGTTCGATAAATAAGCTCATATGTGACAGGTTTTCTTTGTTCAAATAGA    | 12782 | A_95_P001026 | TA14412_4097 |
| 13270 | 157 | 10 | 879  | GTAGGATATTAGTAAGTTAATGAATGTGTGTAACGGTCAATATACTGCTACCAAG     | 12788 | A_95_P181517 | DV158914     |
| 13275 | 157 | 15 | 1784 | TCTCTTGCATATTATCTGTAATAAAGTCAGGAGCTGTATGTCGAGTTTAAATG       | 12797 | A_95_P016816 | TC49390      |
| 13282 | 157 | 22 | 679  | TAAGCTGTTCAATCCCAAGGAGACTTGCAGTATTGCTTTCTCCTTGTCTGGTGTGAGA  | 12811 | A_95_P116687 | FG140162     |
| 13284 | 157 | 24 | 683  | TATTTTCTGCGAGAATGTTTGAAGCTCAGGCGCAAGATCAATTGCTTATCCTCATCC   | 12815 | A_95_P015721 | EB428286     |
| 13285 | 157 | 25 | 198  | GCATATCGTGTATATGTGAAGAAGTGCTACAAAGTTTATCTTATAGACGACTACATTA  | 12817 | A_95_P132107 | EB432551     |
| 13286 | 157 | 26 | 664  | CATTGACCCTCCGGTCTTCAACCTAAAAAGAAAGAACTTATACTAGTTTTGCCTTT    | 12819 | A_95_P148847 | EB450360     |
| 13287 | 157 | 27 | 948  | TAGGGAATTATTTGCCTACAAAAACAAAAACAAAAGGCCACCCGGGAACCAATCC     | 12821 | A_95_P011371 | TA14146_4097 |
| 13290 | 157 | 30 | 605  | ACAGCTTGTGACACCATGTCTTGACACACACATATAGACGTTTTCTTTGGATTGTTTA  | 12826 | A_95_P287953 | FG640153     |
| 13293 | 157 | 33 | 97   | GCAGAACAATAATCCGCTGACAAAACCTTCCAAACACGGACGTGTATGTGCTCTCCTA  | 12832 | A_95_P107027 | FG144865     |
| 13296 | 157 | 36 | 749  | ACAGTAACTAATAGAGATACAAGTGAACATACAAGTCTCTCCTTATAGGGAGCTTTATC | 12838 | A_95_P162517 | EH621473     |
| 13297 | 157 | 37 | 880  | TAAGTCTGCGGCTGATGCTAGCCATATTAATCACTACATGATGAATCCAAATTTT     | 12840 | A_95_P223697 | TA22308_4097 |
| 13298 | 157 | 38 | 766  | AAGTTCTGTGTTGATGAATTTGCTTCTTGTGTTTCCACTACTTTGTTTCAAGTTGTTG  | 12841 | A_95_P181492 | TA12995_4097 |
| 13301 | 157 | 41 | 221  | GTGTGAACTTTTCCATGTTAAGTTGAAATATGGGACATATGAGCTACTAAGATTCCTT  | 12847 | A_95_P164962 | EH624430     |
| 13304 | 157 | 44 | 486  | ATCGAGAATGTCTCCTTGATAGATGCTGGACCTCTCAATATTCGTTCAAATTGCCCC   | 12853 | A_95_P090098 | BP530799     |
| 13308 | 157 | 48 | 390  | TGCTCTATCACTTATCTCTTTGGCAGAGGCTCCATTTCCACCTCTCTGTTTCAATGTT  | 12861 | A_95_P129067 | EB428823     |
| 13313 | 157 | 53 | 769  | AATTCATATCGTTGGTGTCTTGGCTGCAGCGGTCATGTCCTTGACATATTCGATTG    | 12871 | A_95_P014221 | TC44168      |

|       |     |    |      |                                                             |       |                           |
|-------|-----|----|------|-------------------------------------------------------------|-------|---------------------------|
| 13314 | 157 | 54 | 1001 | TGTTTACGAATAACGTTGCTGCTCCAGCTGATTTCTATTTATTCAAATGCAACTTGGTT | 12873 | A_95_P026741 TA14717_4097 |
| 13318 | 157 | 58 | 649  | CACAGGTGCTTCTCTAGATATACTGAAGCAATAAATGTAACAAGTTTTCTGTACAGTC  | 12881 | A_95_P203557 TA17878_4097 |
| 13330 | 157 | 70 | 815  | GGGTTGCTTGTGTTTTGATATTCTGATTGTGAGAGAAGGTTCAATATGCAAAAAGGTT  | 12905 | A_95_P194657 TA15945_4097 |
| 13338 | 157 | 78 | 991  | GCTAGGGGGTGTCTTATTGAAATGAACAACCTTTAATATTGATGTTTCAGAAGTTC    | 12921 | A_95_P007631 TA12296_4097 |
| 13340 | 157 | 80 | 703  | TCAGTTACAGAATCGGCTTGTATTTGCATCCCTCCGCGAAATATATATTGAAAGCATC  | 12925 | A_95_P160472 EH619173     |
| 13342 | 157 | 82 | 397  | CTGCAACCATAGTTGTGTTGTATTTGCTCATTAGGTGAAGTAATTCAACTAAGTAT    | 12929 | A_95_P130757 FS393322     |
| 13344 | 157 | 84 | 1028 | ATGTTGTTGGTGTGATGTTGTTGAGTTCAACCCACAGCGTGATACTGTTGATGGCA    | 12933 | A_95_P010186 TA14510_4097 |
| 13346 | 158 | 1  | 569  | TTTTACATGAGTTGGAAAGGAATTCGAAATGGAGCACACATATGGCAGAGTGGTTT    | 12771 | A_95_P214097 TA20188_4097 |
| 13347 | 158 | 2  | 711  | GGTACATCTATGACAGAGGATTGGTGAAGAAACATCTTATAGTTGGATTGAGATA     | 12773 | A_95_P029141 EB439733     |
| 13356 | 158 | 11 | 361  | TTTAGGCCTAATATTCGTGTATCAAATGCCCCGAGTTGTTAACTCACAATTGTAGCT   | 12791 | A_95_P052206 BP132857     |
| 13366 | 158 | 21 | 757  | GCTCAAGACAATTTGCCTTAGGTATGTATTATATCCTTTATATTTGGGGAAGAAATG   | 12810 | A_95_P200852 TA17299_4097 |
| 13368 | 158 | 23 | 116  | GTAGAAGAGGAATCAGTGATCTGTAGGCATTTTTATTGATTTCTGTGCAGAAACGTC   | 12814 | A_95_P168431 EH664424     |
| 13371 | 158 | 26 | 765  | ATTCGAGTAACAACCTCGGACATGTTTGTGGGGTCAATCACTGCAAAACTTAGCTC    | 12820 | A_95_P147682 EB452193     |
| 13372 | 158 | 27 | 875  | TTGAGAAATCCTCTGTAGCTGGTTGGTTGTTTCGCTTTGATCTATGGTAGTGCAC     | 12822 | A_95_P185897 EB424739     |
| 13374 | 158 | 29 | 712  | CACAGTTGTTTCAAACCTTCTCCTGGTTTGGCTGAACTGATGAACTTCATTGAGGTG   | 12825 | A_95_P017831 BP130210     |
| 13375 | 158 | 30 | 722  | CCGCATTATTGTAATAGTCTCTTGTATTCCGAACGGCCGAAATAAATGGAGATTGAT   | 12827 | A_95_P148922 EB678509     |
| 13376 | 158 | 31 | 404  | GACCAACTTGAAATGGACCAACAGGTTATTTGCTTAGAATGTGAACCTTTCTAGCTTA  | 12829 | A_95_P097438 BP534048     |
| 13381 | 158 | 36 | 382  | AGCGTCAGAGTTTGGACAACTGTCTAGAAGCTTCTTATTCTACGTCTAATCTTTCA    | 12839 | A_95_P293493 FG643621     |
| 13386 | 158 | 41 | 400  | ACCAGATTGCTCTGTCTGTGTTCAAACCAGTCAGGGATCTCGACAACATTATGATCC   | 12848 | A_95_P094758 BP532862     |
| 13388 | 158 | 43 | 891  | AACCTAAGTCTCCTCTGTATGAGATCACATTTCAAGTGTCTGTGATGTTGTAAGTCG   | 12852 | A_95_P235204 TA13446_4097 |
| 13396 | 158 | 51 | 1395 | CTTGAAATGAGATCTATGCTTGAGGTTGGTGTATAGTTCACTAAAGTTCTACT       | 12868 | A_95_P023796 TA15200_4097 |
| 13397 | 158 | 52 | 459  | TTTTTGTAATGCAGGTCAAAAAAGCAAGAGGAATTCAGATAACAAGGTCCAAACA     | 12870 | A_95_P278833 AM848505     |
| 13398 | 158 | 53 | 759  | AAGATGGTGTAAGGCTTCTCCTAGGGACTATAGCATTCCAGGATCAGGAGACAAC     | 12872 | A_95_P127892 EB427451     |
| 13400 | 158 | 55 | 799  | TAAAAGAACTACTACACAAATGGGCCATGGTCAACTCAGCTGCTGAGTCTGAAGGAC   | 12876 | A_95_P309883 FG136392     |
| 13402 | 158 | 57 | 763  | TTGTTGTGTAAGGTTTGGTAAGAGGCAGTTGGATGTGTTTTCTCTGGCTTTGTTT     | 12880 | A_95_P222297 TA22003_4097 |
| 13405 | 158 | 60 | 274  | AGGCTTCTAAGCGCTAGTATTCAACCCCTCCTTAAAGGTGAAAGGTGAGTTCTTAA    | 12886 | A_95_P110247 CV019640     |
| 13410 | 158 | 65 | 663  | TTTCTAAGAGTTTGTAGATAACAAATCTCCTGATGATTCCTTCTCCTGAATGGGTG    | 12896 | A_95_P311068 FG139766     |
| 13412 | 158 | 67 | 754  | ACACCCAGAAATTTTTCCAGCTTGTAGTGCTGCTTCTTACAACCTGGCGCTCTTTCT   | 12900 | A_95_P180052 EB679219     |
| 13421 | 158 | 76 | 803  | GAGGCTATCAATCCGATTTTCATAACTAGTTGGTACGTTTCAATAATAAAGGAGTT    | 12918 | A_95_P270401 EB431749     |
| 13427 | 158 | 82 | 861  | CTTCTCTTATGGACAAGAAGGGTCACGTATCTTCTTTGAATTGAGCAATAAGAAGAC   | 12930 | A_95_P178682 TA12310_4097 |
| 13429 | 158 | 84 | 437  | GGTTTGTGAAGAATGGTCTTTGGTCACTTCATGTGGATTTTCCCTCTGTTCCAAGGT   | 12934 | A_95_P127752 FG147794     |
| 13432 | 159 | 2  | 608  | CTTATGTGAGGCCAACGTGCAATCAAGCTATTGAGTGATTTCTACACAGATCTGAAC   | 12939 | A_95_P058476 BP134482     |
| 13433 | 159 | 3  | 484  | TGTAAGGAACTAGCAATATAGCTAAATTTGTTTATGACTGCCTTGTGGCTGTTCT     | 12941 | A_95_P022426 TA14801_4097 |
| 13435 | 159 | 5  | 193  | GTGAAGGCCTCAAATGTGCTAGTATAAGTGATATCAGGAACTGGATATTAATGT      | 12945 | A_95_P141652 EB445325     |

|       |     |    |      |                                                              |       |                           |
|-------|-----|----|------|--------------------------------------------------------------|-------|---------------------------|
| 13438 | 159 | 8  | 430  | CAGCATGGTGCAAATCTAGTGCCTTCATTTCTAGTTCTATTAATCCCTCCACTTCGACG  | 12951 | A_95_P094168 BP532590     |
| 13443 | 159 | 13 | 874  | CTTAATAGAGCTAAAGGCAAGAAGACCTTGACTCTTTTGCTTTAAACCACTTGTTGC    | 12960 | A_95_P230179 DW000183     |
| 13448 | 159 | 18 | 814  | TGCATCTGTTGACTAGTCACTCGCTCACTATTTTTGAGATATTTGCATCTGATTCTAC   | 12970 | A_95_P000461 DV161017     |
| 13452 | 159 | 22 | 769  | TCCTGGATTTGTGGACTGTGTTTATCCTGATGCACCTAAATGAATTTACAGCTTAGAT   | 12978 | A_95_P157222 EH615261     |
| 13453 | 159 | 23 | 701  | GTTGGCATTAGTTATGCTGAGATTATATCTTATCCACTGTTTGGTTTGGTGTATTGAA   | 12980 | A_95_P120482 DW000413     |
| 13456 | 159 | 26 | 798  | ATAGGTAAGCTAGCCCCTGTATGTCATTATTCATTTCTGAGCTCAGTCTACAACCACI   | 12986 | A_95_P009791 EB428177     |
| 13458 | 159 | 28 | 476  | ATCCTCATCTTCTTCTTCTTGGCTTCTGTCAAGCAACTCCAATCTGAAGTACTTGACTI  | 12990 | A_95_P072960 BP526090     |
| 13459 | 159 | 29 | 433  | TTAAGGCTATAGGGGAAAATGAAGAAGTGTATAGAACTTCGGCGGATGACATGAAG     | 12992 | A_95_P110412 CV019718     |
| 13463 | 159 | 33 | 577  | GCTACAAGTGTTGTTGTTTGTATCGGTACACCAGTTGTAGGAAGGAATTTAGTTTTA/   | 13000 | A_95_P121857 DW001953     |
| 13466 | 159 | 36 | 453  | GTAGATGACTTTTTGCTGAGACAATATGCTCACATTCTCCACATAGTTATTTTGTAC    | 13006 | A_95_P058891 BP134589     |
| 13467 | 159 | 37 | 428  | GAGAGCTTTCAAGATGTTATGTCCATATGATGGTAATGAAGAGTGAGAGATTGGATI    | 13008 | A_95_P008956 EB682455     |
| 13470 | 159 | 40 | 796  | GCAAAAAGTGGAGGATTTGTTATCAGATGACAGCATAAGAGCAAACCTCACTAAGTT    | 13014 | A_95_P115497 DV157724     |
| 13472 | 159 | 42 | 938  | GTTTTGAAAAAGGAAAACCTTTTAGTTGAGTGGAGTCATCGTTGTAGTCATTCACTT    | 13018 | A_95_P191357 TA15218_4097 |
| 13474 | 159 | 44 | 519  | ATGGCATTGATTACGTTCTTTCTGTCAAGACAGTTGTTTTAGCTGTTGGCTTCGTAA/   | 13022 | A_95_P032116 TA12512_4097 |
| 13476 | 159 | 46 | 441  | TGTCTTGACAATTTCAATTTGGCTCGCCGCTTTTGTCTGACAACACTATTGTTCTCAG   | 13026 | A_95_P066080 BP136501     |
| 13479 | 159 | 49 | 577  | ACCTGAATCAAGCTACATCAATGTTCTGGTCCGCATTTTATGCAACCTGTGTTGGCTA   | 13032 | A_95_P204662 FS409048     |
| 13480 | 159 | 50 | 1234 | GTCTACTTACCTCAAGATGAGTTAGCACAGGCAGGTCTCTCCGACAATGACATTTTTG   | 13034 | A_95_P186367 TA14111_4097 |
| 13481 | 159 | 51 | 203  | TATCATCTGGATTGGCTGGATTTTTACTTTTTCCAGGAGCCACTACCAATTCAGGGGTT  | 13036 | A_95_P155882 EG650309     |
| 13482 | 159 | 52 | 119  | GATCAGTGAATCAGCCATATACTCAATGAACAAGGTGAAAACCTAAGAACACTTGGA/   | 13038 | A_95_P046291 BP131358     |
| 13493 | 159 | 63 | 539  | CCTGACCTTAGTTATGTACAGAATGTTTGTCAATTTTGCATGAATGCATGAAAATGATG  | 13060 | A_95_P006461 BP135407     |
| 13494 | 159 | 64 | 550  | GCACACACCATAGTTCTGTCACCTCTTTGTTCTTTCACAGAATTCTATTGAGAATTGTTA | 13062 | A_95_P219312 EH615351     |
| 13497 | 159 | 67 | 843  | CATGTAGCAAACCTATGTATAGTATTCTTCTCTCTATGCATGTCTGTCGGGTTCCCGC   | 13067 | A_95_P263101 FG163595     |
| 13498 | 159 | 68 | 235  | ATTATTCTGAAGGGCGGAAGTCCTAATAAAGGTAATCCTGCGGTTATGCATGGGAAC    | 13069 | A_95_P029221 TA19047_4097 |
| 13500 | 159 | 70 | 517  | TTTGATCTGGACATGTTTTATGAAGTCTCGCCAGCTGACAACTGTGTATCTGCTAGC    | 13073 | A_95_P025671 TA14517_4097 |
| 13504 | 159 | 74 | 779  | AAATGTAACATATGGGTTTACTGCCCGTCAGAGACAGGATGCCACTCTCCGGACATT    | 13081 | A_95_P289538 DV159765     |
| 13506 | 159 | 76 | 841  | TCTTGTTCAGTGTTAGTGCAACTACACCAGAAGACATGGTGATCTATGATGGTCTTT    | 13085 | A_95_P013566 TA17008_4097 |
| 13508 | 159 | 78 | 198  | CGCTGTTCAGTACCTCTCCCGATATGTCGAAATCAATATGAGTAGAGTTTCTGTAAT    | 13088 | A_95_P077590 EB425809     |
| 13509 | 159 | 79 | 358  | CGTCAAAGCAAGAAAGACATTCACCTGTTTGTCTTGAAACCTGTATGTAAGAAATCAC/  | 13090 | A_95_P085285 BP529241     |
| 13511 | 159 | 81 | 500  | TCCTTATTGCTTGGGCTTGCTTAAGAGGGTATACTCAAAGAACCATTGTATTGATG     | 13094 | A_95_P161597 EH620274     |
| 13514 | 159 | 84 | 865  | CTTTTTCTCAAGGAAACTGTTCCATAATAATAAGGATGCCCTTTTGGATGTAATTC     | 13100 | A_95_P290408 DV999295     |
| 13518 | 160 | 3  | 817  | GTTGCCTACTGTGTTTTGATGATTTATGTTTCGAGAATTTTGGAGTGTGTTCTTGCC    | 12942 | A_95_P198207 DV158366     |
| 13519 | 160 | 4  | 684  | CTTTCATGTTGGTTTCTCTTGACATTGACCAGGATAGTCCAATAAAAAGCTTAATGT    | 12944 | A_95_P275483 TC63004      |
| 13530 | 160 | 15 | 204  | TGTAGATCTTTTGTAGTCTTTATATCGGCATTATTGAGAATGGAATTTTGCCTGTC/    | 12965 | A_95_P100578 BP535437     |
| 13532 | 160 | 17 | 577  | TAGGTATCAAGGAAAATCCATTCTGGCTTCAAAGGGACGTTTCTTTTGTGAAATAA/    | 12969 | A_95_P035398 BP128462     |

|       |     |    |      |                                                              |       |                           |
|-------|-----|----|------|--------------------------------------------------------------|-------|---------------------------|
| 13533 | 160 | 18 | 707  | TTATATTTCCAGCACAAACATTGTGCATGCGAATACAATGGATGGCTTTATCATCTT    | 12971 | A_95_P014301 EH623509     |
| 13534 | 160 | 19 | 311  | CCCAACATACACCTGTGTACAGTTGAATAATCCTGCTTCTGCTCAGTGTGCAGTTTAT   | 12973 | A_95_P111057 CV020030     |
| 13536 | 160 | 21 | 233  | GAAACTGGAGAAGCACTAGTATCCTCTGTGACAAAATGATATTTGTTGGATCACCTC    | 12977 | A_95_P136727 EB440488     |
| 13539 | 160 | 24 | 451  | GTGCTCTCTGTTATTCTGTGTTTGCTAAGTAGTTTATTGGTGTAACATAAGACTTGTG   | 12983 | A_95_P060455 BP135001     |
| 13540 | 160 | 25 | 454  | GCTGAAACAACATGTAGCTAAGGAACTTCACAGTTTGGAAATTGCACAAGGTTGATT    | 12985 | A_95_P001251 EH620046     |
| 13542 | 160 | 27 | 481  | AAGTATCTTGGAGACTTAGAAAGCTGGAACAAGGCTGAAGATTCTTTCGCGAAGC/     | 12989 | A_95_P035558 FG142279     |
| 13544 | 160 | 29 | 780  | TATTTGATGAATGTTAGCAAGGGGGAAAATGTAATGTAACCTGTACTTTGGTTGTCAA   | 12993 | A_95_P187477 TA14354_4097 |
| 13546 | 160 | 31 | 469  | GAAGAATGTGGGTGAAAAGGTTCTTGGTTTCTTTTATTAAGTTCCTTATGCTGACAA    | 12997 | A_95_P157412 EB439805     |
| 13549 | 160 | 34 | 901  | TTTTGGAGCTCCTGATTATGCTGAAGCTATTAAGGAATCAAGACAAGCAAAAGGCC     | 13003 | A_95_P243857 EB429842     |
| 13550 | 160 | 35 | 795  | AGATGAAATACTAGTGGAAAGGAAAGGGGGTCCATGGGAGTGACTTTACTACTGCT     | 13005 | A_95_P311568 FG143668     |
| 13551 | 160 | 36 | 325  | GAGTGCTTATCTGCTGGAAGTTGAATTTGGGACATTTAACTTTCAATAATATCGCCA    | 13007 | A_95_P109672 FS429988     |
| 13554 | 160 | 39 | 265  | TATACGAGAGGTGCTCAAAGGATACATACCAGATACGCGGCCCATGACTTATGAGA     | 13013 | A_95_P110962 CV019986     |
| 13557 | 160 | 42 | 780  | GTGACAATTCTGCTAAAGGTCCAGTTGCTAGCAAAAATGAGGATTACAGATCTTATC    | 13019 | A_95_P148582 EB677946     |
| 13558 | 160 | 43 | 465  | CCCCAACAAACAAATGTGGTATAATTCTCTACTGTCCCTGACTAGAAGGGGAGATAT    | 13021 | A_95_P047681 BP131717     |
| 13561 | 160 | 46 | 553  | CTATTAGAGTACTGCAGCAAAAGGGTTCATACCTGTTTTGGCTTTGTTGAAACCAGT    | 13027 | A_95_P041941 BP130226     |
| 13565 | 160 | 50 | 475  | TGTTCTTTTCATTGTCATATCTGTATGTATTCGCAGTTTGACCTTTGATTAGACTACC   | 13035 | A_95_P103547 CV016564     |
| 13568 | 160 | 53 | 479  | CTATTTGTTGCATAGTGGACCATGCCCTATTCTCCATTGTTTTAAGGTATGAATACC    | 13041 | A_95_P255849 AM817974     |
| 13569 | 160 | 54 | 813  | AGAGCTGAGCTTGATAGTGAAGTGAGGCATCAACCTAAAGCTGGATATTTGTCACA     | 13043 | A_95_P307123 FG148524     |
| 13571 | 160 | 56 | 432  | AGTGGATCTGAGACCTCAAAGCCTACAGTTCAGTCCCCATAAAAGTTTCACATGAA     | 13047 | A_95_P093663 FG635489     |
| 13572 | 160 | 57 | 2258 | CCAGAACCTTTGCGCTGGTACTTTTTATTTATGGCTTTTGACAACCTTTGGATTATTTCT | 13049 | A_95_P234239 AF190655     |
| 13573 | 160 | 58 | 344  | CTGTCTTGTCCCTTTGCAAGTGAGTTGTTATGTGATTTGTAGTAAGATGAATATATTT   | 13051 | A_95_P085420 BP529274     |
| 13574 | 160 | 59 | 950  | CAAGTTGAGTTTTGTTGTGACGATCTCAAAATTTGCATCTTGTTCTTTGCCTATGTT    | 13053 | A_95_P177172 TA11899_4097 |
| 13575 | 160 | 60 | 349  | GGTCCCCTATTATCTTGCAGAGCTAACAGAAAAAGTTGCAGACAATGACAGGATAAA    | 13055 | A_95_P070530 EB680539     |
| 13576 | 160 | 61 | 712  | TAAGTTTTGCATATACATTATCCTCCCCAGACCCACGTGGTGGAAATTCACGGGTTTT   | 13057 | A_95_P164187 EH623329     |
| 13578 | 160 | 63 | 965  | AACCTTGTCTCAGCTTTGGTCTTGCTGTCCTCATTTGTGATCCTGTGATTTTCTTGCT   | 13061 | A_95_P192927 TA15561_4097 |
| 13583 | 160 | 68 | 251  | GGAAGGCTTGATGTTATTTCTTAGATTGTGATTAGGTAAGGACTGGACAATTTAAGAAC  | 13070 | A_95_P111147 EH619918     |
| 13586 | 160 | 71 | 673  | GAAAGTGAGATGGATTTCTCTGCTTTATGATCTAGGTTTTGCAGAATGCTCTTGAATT   | 13076 | A_95_P182482 DW003915     |
| 13587 | 160 | 72 | 563  | CGCTAACGCCGGCCAATGCCACCTCTATTACCATTTTTTGTGCGTAAATCTTTGTTCT   | 13078 | A_95_P284548 FG637689     |
| 13590 | 160 | 75 | 799  | GACTAGTTTATGGAACATAAATTGATCGATAAATAATCCCCTCCTCCCCTTTTCCCT    | 13084 | A_95_P017161 TA21967_4097 |
| 13597 | 160 | 82 | 798  | GATATTTTCTATATGCAGTATTCTTTAATCTTACCATGAGTTGACGTTGATGCCTGGA   | 13097 | A_95_P180082 DV157481     |
| 13598 | 160 | 83 | 402  | GATGTGTGAAAACAATGTATTGCAGGATAAGTGGTCATCGTGCTTATGATGTGAGC     | 13099 | A_95_P079520 BP527786     |
| 13599 | 160 | 84 | 800  | ATTGAGTACACCAATTGCTTTGATGCCAATCTTGACACTTGTGCAGCTGCTCTTGCTG   | 13101 | A_95_P291853 EB427579     |
| 13606 | 161 | 6  | 736  | TAGAGTTTTCTTCTCTTAAACCAGACCTAGAATCACAGAAAGTTGAGTGCTAAACC     | 13113 | A_95_P202967 TA17755_4097 |
| 13611 | 161 | 11 | 754  | ACACTAGGGATCGAGGCTCTACATATGCGTAGCCTTCTTTTCTTTTGTAAATTTCTC    | 13123 | A_95_P010236 EB439033     |

|       |     |    |      |                                                             |       |                           |
|-------|-----|----|------|-------------------------------------------------------------|-------|---------------------------|
| 13612 | 161 | 12 | 1365 | GGGAGATTGCTTGTGGCTTAAGGTGACGTTTGTGGAGATTTCTAAAATTAATTTG     | 13125 | A_95_P222132 TA21965_4097 |
| 13613 | 161 | 13 | 386  | ATTGACCAGTGCTATATAGATCTGGAATTTGAAGAAGAAATATGGAGGAGTTCGTT    | 13127 | A_95_P092358 BP531762     |
| 13616 | 161 | 16 | 197  | TTATTCCTTGGCGAATGATTGATCTTGGTGAGCATTATTTCTAGTTTCTCTCAAGGCT  | 13133 | A_95_P034164 AJ718241     |
| 13619 | 161 | 19 | 558  | CAATATGTTACCTCACAGGTGATTACATGCTTTGACATTCTCGTATGTTGGGGGGTCT  | 13139 | A_95_P080190 BP527945     |
| 13620 | 161 | 20 | 305  | CAAATAGATATGGTGCCGTAAGATAAGTTCTGTCTTAGATATCCTTCTATCTCCC     | 13141 | A_95_P108972 CV019089     |
| 13626 | 161 | 26 | 337  | TTAAAACAAGTTTGAATTTGGCTCTACATCTTATTCTCATCCAGAAGCGTAAGAGTTT  | 13152 | A_95_P133427 FG643621     |
| 13627 | 161 | 27 | 681  | AGCATTATGTAATGTCACCATTTTGAAGCAATGCCATAAGGGGCGGATCCAAGATTG   | 13154 | A_95_P192962 TA15568_4097 |
| 13629 | 161 | 29 | 383  | TGCAATCTTCAATCAACTTTGGTTGTCGCATGGAAAATTTGGACTATGCACATCTTA   | 13158 | A_95_P006261 FS381087     |
| 13634 | 161 | 34 | 387  | GTCAAATCAATTGTTCTTGTCTATTAGGTAGGTGGATTACACCTATTATACTTTGCCT  | 13167 | A_95_P281583 AM796827     |
| 13636 | 161 | 36 | 689  | GATACTGCTGCCATGACAAGTACGTGCGCTTTGTTAATGTTCTTTTGTGATATGT     | 13171 | A_95_P017621 TA12435_4097 |
| 13637 | 161 | 37 | 543  | TTGTTGTCATTTCTATTGTCCGGGTTATTTAGGGCTGTAATTCGGATATTGTCTTGTG  | 13173 | A_95_P148902 EB678440     |
| 13644 | 161 | 44 | 710  | GAAGATGAGAAGAGTGTCCAAGCAGCTTGTAAAGTATGATAGGCCAAAAATAATTGAG  | 13187 | A_95_P272781 EB679187     |
| 13645 | 161 | 45 | 688  | ATTCGAAAATCAAGAAAATGGATCAGTATGTTACCGCCACTGCCCTGCTCCATCGAC   | 13189 | A_95_P137997 EB441707     |
| 13650 | 161 | 50 | 421  | AACTTTGCTCACTTTCAAATATAAGTGACTTTGTATTTGTGGTGCCTTTCCCTATCAA  | 13199 | A_95_P108397 CV018816     |
| 13653 | 161 | 53 | 638  | TAGTTGGACATTTTCTTTTATATGTCCTTAGGGCCTCTCGAGGGTGCACGAATTCC    | 13205 | A_95_P164217 EH623365     |
| 13658 | 161 | 58 | 518  | TAGTAGAAGAGGGTGGCTATAACAATTGATGCGGTGAGTGTGAAATGTCGGGCGAT    | 13215 | A_95_P074690 BP526533     |
| 13661 | 161 | 61 | 764  | ATGTTCTGATGTTGTGAGAGATGAAAAGTGTGAGACAATGTAATCTTTGTGATTATC   | 13221 | A_95_P029956 DV160716     |
| 13676 | 161 | 76 | 519  | GCTGATGGCAGTGGTTATAACGTATCATTGAGTGTGGTCAACAATAATCTCAAACCA   | 13251 | A_95_P103587 CV016589     |
| 13677 | 161 | 77 | 632  | ACAGGTTGTGGGTAGTGTGGGTATTGGAATTAAGTAGAAATATTGATGTTTGTCA     | 13253 | A_95_P151612 EB681852     |
| 13678 | 161 | 78 | 356  | GGGTGCATGTTCCATGTTCTCAAATTCTTGTGAGTTGTTCCAGTTGCTTTAATTT     | 13255 | A_95_P002741 TA16339_4097 |
| 13680 | 161 | 80 | 102  | CATTCAATAAGATGAAGATGATGTATGTGGTGGAGGACGTATTGTATCTAGGAATA    | 13258 | A_95_P132892 EB433703     |
| 13681 | 161 | 81 | 837  | AATTCACAAGGTGAAACACCACTGGATTGTGCTCCTGCCACATTGCAATCAAGATG    | 13260 | A_95_P226139 EB439999     |
| 13682 | 161 | 82 | 496  | ACTGCATTCTGAATTCAGAAAAGATAGGGTTAAACTGTTCTTGGTACTTTTGGTCTA   | 13262 | A_95_P187558 TA14374_4097 |
| 13685 | 161 | 85 | 658  | ACAGAGAGTCTTCTACTTGCAGTGTGTATCTGATACTGAATCGAGGAAGTGAAGT     | 13268 | A_95_P301228 FG182635     |
| 13686 | 162 | 1  | 0    | AGATTCTGCAGATGATTTGTAGTGACTACTAGTACTTTTGTAACTAGGCTGTCTACTG  | 13105 | A_95_P313883 A_95_P313883 |
| 13695 | 162 | 10 | 729  | GTAGGTGAGTTAATGTCAAAGCTTTGGTAGGATATACTACTTCATTTTCTCTGTTAGC  | 13122 | A_95_P198992 TA16897_4097 |
| 13696 | 162 | 11 | 734  | GGTGAAGGCCCAAACAAGACTAAGATAACTGGCAACAAAAATACCTTGATGGTCTCC   | 13124 | A_95_P314988 FG199121     |
| 13698 | 162 | 13 | 229  | GGCCTCTTCAAATAAATGTAATGGTTGTTGACAGTATGAATAAAATTGCAGCTTCTT   | 13128 | A_95_P211897 TA19715_4097 |
| 13700 | 162 | 15 | 1086 | CCATGCATGATGAAGCTTGAATTTCTGCTAGTTCATTTGGGTATTCACGTTATTATTTG | 13132 | A_95_P023091 TA12370_4097 |
| 13706 | 162 | 21 | 540  | GTGGAAGGTTTTAAGATGTACCTACAGACAATATACCGCTGCCTGATACATGAATA    | 13144 | A_95_P221312 TA21794_4097 |
| 13714 | 162 | 29 | 898  | GGTTGAAGTTGTGATAGTTCTGTATACTCTTCTGCATTGTATAATAAAGGATAACCA   | 13159 | A_95_P210737 TA19459_4097 |
| 13715 | 162 | 30 | 428  | TTGGCCGTTTACTTATCTCTAATTTCCATCATCGGTGGCTGTGGTCTTTCTGCTTTAC  | 13161 | A_95_P011071 DV158401     |
| 13716 | 162 | 31 | 503  | TGATGATTTAGCGGGGAGATGAAGAAATAAAGGTACATGCAAAGGAGCCCTGTC      | 13163 | A_95_P131302 FG143691     |
| 13718 | 162 | 33 | 449  | TTAGCGAGGTTCTGCTATGGTGAAGTGAAGATCTTCACTATAGTGGGAAGAAG       | 13166 | A_95_P071050 BP525606     |

|       |     |    |      |                                                             |       |              |              |
|-------|-----|----|------|-------------------------------------------------------------|-------|--------------|--------------|
| 13719 | 162 | 34 | 362  | CATGCATCGTTTTCTGATGATGACCTTTACTCTCCAGTTGCTCAGTAATTA         | 13168 | A_95_P097293 | BP533969     |
| 13722 | 162 | 37 | 674  | ATCTTGATACTTGGGGTGGACACCTTTGAGTTATGGATGTATTGGGTGCGGATGTTG   | 13174 | A_95_P063830 | BP135886     |
| 13729 | 162 | 44 | 303  | GTAGTACCTTAATGCTGTTTGTATGCTGCATCAAAGAAAGCAATCTGTTACAGAACT   | 13188 | A_95_P164332 | EH623500     |
| 13731 | 162 | 46 | 143  | CATTGGGTGGCCTGCCTAATTGCATACCAACTATGTAAATTTTTGTAAAAATGTAGC   | 13192 | A_95_P002966 | CV020097     |
| 13737 | 162 | 52 | 598  | CTAATGTTGGCTTTCTGCTGGTTTGATATAAGTAATGTATTTGTTCTTGCTTTTCTGCG | 13204 | A_95_P026041 | EH623514     |
| 13738 | 162 | 53 | 525  | CCCCCTCACGTAATAATACTGGATGTGATAGGATTTTAATTGTATCGTTGCAGCTAT   | 13206 | A_95_P001901 | BP129353     |
| 13739 | 162 | 54 | 573  | GAGGTCCAATATAGTTGTTTCCCAAGAAACAAGAAGAAATACAATTAGGGGAGTAC    | 13208 | A_95_P124207 | DW004062     |
| 13741 | 162 | 56 | 4313 | TAAACTATCTAATGGTCAACTGGTTGATTTGATTCCGTGGTGCCTGCCTAACACTGCT  | 13212 | A_95_P251627 | AY567977     |
| 13743 | 162 | 58 | 940  | TTCTGCACTAAATGATGTTACTGCAATGGAGTTGCCTGATATTGTTGCTGAGGCTGC   | 13216 | A_95_P242967 | DV159439     |
| 13746 | 162 | 61 | 902  | ACATACCGCTGTCTTGCCCTTCACGCTTGTGAGAATCACTTTTTATTGAGAAAGTTGTT | 13222 | A_95_P208727 | TA19031_4097 |
| 13747 | 162 | 62 | 751  | AAGATGAAGTCAACAACATTGAGCCTTTGGATCTCTGTGGAAACCATCCTGACTGCC   | 13224 | A_95_P244077 | FG139319     |
| 13752 | 162 | 67 | 645  | TAAATTGGGAAGCTTTGGAGGAGTTGTCGTTGAGCAGTGGAAATAAGCCACTCAGC    | 13234 | A_95_P000901 | EB451750     |
| 13754 | 162 | 69 | 187  | GATTGGTTACGAAGTTTGTCTCTGTAGTGTCTCAGTTTTATCCAACACTGTTTACT    | 13238 | A_95_P097593 | BP534118     |
| 13755 | 162 | 70 | 813  | TGTACCTGTTTTGCTTGATGAGCATATTGGAGAGGGAAAAAGTCATTGAACGACTTTG  | 13240 | A_95_P294028 | EB440637     |
| 13761 | 162 | 76 | 417  | AGCCAAACCTCGAGATTTATTCAGAAAAGAACCTCAACGGTAATATCTTTCATTTTG   | 13252 | A_95_P048966 | BP132049     |
| 13766 | 162 | 81 | 642  | TTATATTTGGTTTCCCCGAAAGCTTGTGTTCCACAAGGCAAATGGCATCTCTTTTT    | 13261 | A_95_P014606 | BP130287     |
| 13767 | 162 | 82 | 777  | GATCACCTTTTGGTCAAATATTCTATCGACACGTTAGTGTAAAGACAATCTATTTGAC  | 13263 | A_95_P004201 | X65700       |
| 13769 | 162 | 84 | 779  | ATTGTTGATGACGCATCTGCTCTACTGGGATATTTTTAGGGCATTGGCCCCAAGATCC  | 13267 | A_95_P255379 | FG136640     |
| 13773 | 163 | 3  | 951  | TAAGCATCATGAAACTGGAGAGTCTCTCCAGAAGACATATAACAAGAAGCTTCTTAC   | 13274 | A_95_P014511 | TA15524_4097 |
| 13774 | 163 | 4  | 549  | GTCTTTCGTTGGATGTTAGGGTTAGTGATGTAAATCAAATGACTTGTTTCAGTCAAAC  | 13276 | A_95_P003466 | DW003379     |
| 13776 | 163 | 6  | 369  | GCTAGGGGGTCTCTATAATTATCAGAAACTTTTCTTCTGGAACACTTTGAATCTTCTC  | 13280 | A_95_P220452 | TA21610_4097 |
| 13783 | 163 | 13 | 96   | GTATCGAAAAGAGAGCATCATGTATAGTAGTGATTCTTATGCAGTTCTTGTTTGCTGA  | 13294 | A_95_P132302 | EB432768     |
| 13784 | 163 | 14 | 809  | TATCATATGATCATGGTAAATTTTATTGTTGCTTGCCTGGGCCAAGGGACAGAGAAG   | 13296 | A_95_P197732 | EB681120     |
| 13785 | 163 | 15 | 828  | CTGCTGCGCTACTGTTGGTATGTGCGATTACTTGTGTATGTGAATAATGCCATGCAACT | 13298 | A_95_P147227 | EB451494     |
| 13787 | 163 | 17 | 877  | GGGAACATGTACATAAGGCATAGCTGCTATTCAATGGCTTTCTTCTTCTTCTTTT     | 13302 | A_95_P226064 | DV158290     |
| 13790 | 163 | 20 | 570  | CTTTCCTTATGGAAGAATCTTGATATTGAGGTCGTAGATGGTGGACTGATATGCTC    | 13308 | A_95_P047146 | DV999838     |
| 13793 | 163 | 23 | 869  | CAATACTTTGATTTGAATAATCTGTCGTCGTCTAATGCTGACAAGAAGATGTTGTG    | 13314 | A_95_P272791 | FG158149     |
| 13795 | 163 | 25 | 682  | CTCTTGCAAACCGAAGCTTGAACAAGTACTAGACGGTCTTATAGAAATGCAGC       | 13318 | A_95_P306973 | FG151496     |
| 13797 | 163 | 27 | 497  | TGGTAGATTTGGCCTGGAGTTTATTTTCTATTCAATGTTCCAAGAACAATGCAGC     | 13322 | A_95_P098583 | BP534557     |
| 13799 | 163 | 29 | 500  | CTTGCTCCATTTGTGTTGTAATTTTATTAATCACTATCGGTTATCTTGGCCCTAGTCGA | 13326 | A_95_P021186 | FG644605     |
| 13812 | 163 | 42 | 872  | GGGTCATTTGTGTATATACCAAGAACACCAAGTGCCTATGCAAATATCTACTTATT    | 13352 | A_95_P236544 | DW000893     |
| 13815 | 163 | 45 | 51   | GGAGAAAACAGTCATTTGTAAGGACACGAGAAATCATCTTAATACTGGTTTACT      | 13358 | A_95_P256319 | EH618738     |
| 13816 | 163 | 46 | 952  | CTTGACAGTCTTGAAATCAAATCAACCTTATTCGCTTCCAATTTATTTCTGTGCTG    | 13360 | A_95_P203012 | TA17764_4097 |
| 13821 | 163 | 51 | 440  | GTGGGGAAGCATATATTTATCTGGTTTAGGATAGTTTCTTTGGCTTGACACTATAAC   | 13370 | A_95_P114247 | CV021515     |

|       |     |    |      |                                                             |       |              |              |
|-------|-----|----|------|-------------------------------------------------------------|-------|--------------|--------------|
| 13822 | 163 | 52 | 335  | TTAGTCCTGGTCAAAGACTTTAGCTCGCATATAATTGGTGACTTGTACAAATAGATAT  | 13372 | A_95_P141882 | EB445504     |
| 13826 | 163 | 56 | 544  | TTTCTGCCTTACTCTGGGTATTCAAACCTTCTATGGATATTTGATGATATTTCAAGTCA | 13380 | A_95_P183317 | TA13431_4097 |
| 13831 | 163 | 61 | 1434 | GCCTCCAAAACTGATGCGACAGTAGAATGTTTACTTTTCTCTGTGCCTGTTATAGTA   | 13390 | A_95_P192672 | TA15504_4097 |
| 13832 | 163 | 62 | 776  | GAGCTCCATCAGCTCATTATTTCTTTCTTTAGGCTATGAAAGCGTTCTATTTCTG     | 13391 | A_95_P189477 | TA14797_4097 |
| 13833 | 163 | 63 | 379  | CTGTTTCATAGTTTTAGCTGGGGTTGTTAAGTGTTAACTTGGGATACACTGTTAATGA  | 13393 | A_95_P004336 | TA13705_4097 |
| 13834 | 163 | 64 | 589  | CTCTTGGATCACTTTAAGCATTCTGGGCCGAATGGGCAGCATGTTTGTATGGTATTTG  | 13395 | A_95_P128377 | EB428075     |
| 13835 | 163 | 65 | 662  | CAGCGATTGTCAGTCAATTGTCCTGTAGTATATTATCAGGCACAATATGTATTTTCGT  | 13397 | A_95_P136162 | EB439792     |
| 13836 | 163 | 66 | 326  | AGCCTCTTACAGTAAGCTTAAACTATAGGGATGTCTCTATGGTGAAGTGAATTTA     | 13399 | A_95_P109837 | CV019462     |
| 13840 | 163 | 70 | 542  | TGCTTATGCTTGATTGAGTCAGCATAATAAATAAACAGCTGCCAAGTTGGTGTATTTT  | 13407 | A_95_P222527 | TA22053_4097 |
| 13841 | 163 | 71 | 826  | AAAGTGCATGCCAACAACTTCCAAAATTTGCTACCTTTGCAAATTCAGTATGAGAAA   | 13409 | A_95_P011506 | DW000343     |
| 13844 | 163 | 74 | 1402 | GCTAAGGGAATGATAGTGGATCATGTGCTTGACATGTATATACATATTTTCGTATTAG  | 13415 | A_95_P025466 | TA14191_4097 |
| 13846 | 163 | 76 | 222  | CCATATTGTGCCACAGAATGATGGCCTTCATAAACCATTTGTGGAAACGCTGGAGAAC  | 13419 | A_95_P146337 | EB450358     |
| 13849 | 163 | 79 | 808  | AATTGGACTATTTAGTTGGGGCAGTTTCAAGTCCAAAGAGGCCATTTGCTGCTATTG   | 13425 | A_95_P008581 | Z48977       |
| 13852 | 163 | 82 | 721  | GGCTGGACCATAATGGGCTCTTATTTTTCTTTCCACTTCAGAATTTTAAAGTTTTTGT  | 13431 | A_95_P202057 | EH615240     |
| 13854 | 163 | 84 | 505  | GCCATCGAGTTCCTGATTTTTGATTTTTCTCTTGGAGTGGATTTGAACTCAAGCTTGT  | 13435 | A_95_P088863 | BP530252     |
| 13856 | 164 | 1  | 1123 | TTTTGTAATGAGACCTGAGCTATAGCGAAGTAAATAATGGACTGAATCATTTTTTCC   | 13271 | A_95_P204562 | TA18092_4097 |
| 13857 | 164 | 2  | 832  | TGATGATGTATCTGTGGATATAGCTGTACTCAACCCAGTGCAGAGACTTTGTCAGTG   | 13273 | A_95_P307393 | FG141895     |
| 13858 | 164 | 3  | 656  | GCCAATTACTTTATCCCAAATTTGATGGGACTACTATGTTTACAATTGACACATCATG  | 13275 | A_95_P031036 | TA14624_4097 |
| 13862 | 164 | 7  | 367  | GGTGGAAATCCAGCACGTAGATGATTTCAAGTCTAGTTTTGTGTTATTTAATGAGGA   | 13283 | A_95_P029711 | BP533659     |
| 13864 | 164 | 9  | 911  | TGTTAAGTATTTGGAAAGGATGTCTAGGCAAGTAGGATGCGCGCCAACTATGAGAC    | 13287 | A_95_P268206 | DW000064     |
| 13869 | 164 | 14 | 426  | TTTTCATATGCTTTTCTTAATGGGTCCGGTGCCTGTTGGTTACATCTCGAGGCTATTT  | 13297 | A_95_P081210 | BP528200     |
| 13870 | 164 | 15 | 812  | AATCAAGCAGATAGGACTGCAGTAGTTCTGCCTCAAGGAACCTCTAGGTGTGTAGAC   | 13299 | A_95_P269936 | EB428068     |
| 13871 | 164 | 16 | 890  | GAGGAAGACGATGATTAGTTTACTACATAACAAGAATTTTGGATTCTTGTGCTTATC   | 13301 | A_95_P260046 | EB677659     |
| 13873 | 164 | 18 | 808  | GATCTGTGCTTTCACGATTTTGGTGTGTGCATGCTGTCTCCATGGGACTAATATTTCT  | 13305 | A_95_P299693 | FG139470     |
| 13875 | 164 | 20 | 867  | GGACTTCAGCTCTCTAGAAGTACAATCATATACTTCAAGCACAATGATATGGAGTCCT  | 13309 | A_95_P296433 | EB452117     |
| 13876 | 164 | 21 | 492  | AATGGAAGAACAATAATTCACGGTGATGGGCTATTGGTGAATTTAGCAAACGAAG     | 13311 | A_95_P040086 | BP129731     |
| 13878 | 164 | 23 | 445  | GCTTCTTGACGCTTTGCATTTTGCTTTTTTCTATACAGTACTTGGGGCCTGAAA      | 13315 | A_95_P158957 | EH616859     |
| 13883 | 164 | 28 | 2616 | CAATTTTGTCTGTATTGTCATTATCCACGTCTAAGATAATGGACCTATGTTTTAGCTT  | 13325 | A_95_P250777 | X77915       |
| 13885 | 164 | 30 | 820  | TTGGACAAATGGATGATAGAGAACATAAAGTCTGGAGAAGAAGTTTCTAAACATACTC  | 13329 | A_95_P127222 | EB426697     |
| 13886 | 164 | 31 | 868  | ATTTACTACAATGCCGTTAAGTCTCCGTATTTGATTTTTGACGTGGATTACTCCTAAA  | 13331 | A_95_P196852 | EB680458     |
| 13889 | 164 | 34 | 848  | CATCAATAATCGAGATCTTGAACATTCAAGGTGGACATTAGCAATACCAAAAACCT    | 13337 | A_95_P126097 | EB425332     |
| 13891 | 164 | 36 | 768  | CACACAGCTTATCATATTCAGACCAGACTTGATTATTGTGATTTGTGTAACATGAAAC  | 13341 | A_95_P015576 | EB438873     |
| 13895 | 164 | 40 | 1152 | TGTTTACATTCTATGTTGACTTATTCTTCTGGATGAAAGTTGATTTGAGGTGTGCTG   | 13349 | A_95_P192367 | TA15436_4097 |
| 13898 | 164 | 43 | 780  | GGCTGAATTCATCTGATATTGACAAAGAAGCTGTTCTTTCAAGTCTCTTAGCTAGAA   | 13355 | A_95_P254779 | EH616966     |

|       |     |    |     |                                                              |       |                           |
|-------|-----|----|-----|--------------------------------------------------------------|-------|---------------------------|
| 13899 | 164 | 44 | 843 | TATCGTGACTGAGGGTCGAATATCTGCTTGGGGAGGGTACATCAAAGTATCGATTTG    | 13357 | A_95_P296058 FG143518     |
| 13903 | 164 | 48 | 938 | ACGTTGCAAATTTTTCCCTCTCCTTGAATACTCATCTGTATTTAGATCTTATGCTG/    | 13365 | A_95_P196857 TA16434_4097 |
| 13904 | 164 | 49 | 657 | CAGACAATTACTTTGGATTCATCTTGATAAGAAGGTGCCTACTGGGGCTGGTCTTG     | 13367 | A_95_P136612 FG134239     |
| 13909 | 164 | 54 | 696 | CAATGAAGCTAGAATACAGCTTTACTGGCCAAGATACATGTCAGTTTTTCATTTAGTT.  | 13377 | A_95_P022371 TA13932_4097 |
| 13915 | 164 | 60 | 704 | TAGCTGTTAGCAGGATTATTTGGTTATGTTTCTCATTGACTTCATTGATTACCAAGGTC  | 13389 | A_95_P213007 TA19958_4097 |
| 13917 | 164 | 62 | 508 | ATTTTCCCTCATTTTGAAGATATGTTTAGGCCGCTGCATTCTGGGCCAGCAAAGTAG    | 13392 | A_95_P005806 BP528616     |
| 13923 | 164 | 68 | 558 | TCTTTTCCCTAATCACTCCATACTTGATGAGAAAAGAAGAGTGGGTAACTTTTCTACCC  | 13404 | A_95_P158517 EB427996     |
| 13926 | 164 | 71 | 763 | GAGAAAGAGATCGAGAAATGAGGACTTTTATACAAGAATTTGATGACTTTGCCACTC    | 13410 | A_95_P159167 EH617126     |
| 13931 | 164 | 76 | 189 | GTCCAATGTAGTCTATTAGTGAAACAGATGTCTGTACTGTACCTAAAACAACACTTC    | 13420 | A_95_P096083 BP533466     |
| 13934 | 164 | 79 | 730 | CATGCCATATAGCACCAGCTTTGAGATATTCTTAGATATCGTTCTCTATACTGATTG/   | 13426 | A_95_P117337 TA14846_4097 |
| 13935 | 164 | 80 | 559 | AACTTATCAAACCAATGCATCTGTAATTGGAGCTGTTCTGCAGCAAGCAGTGCTTCC    | 13428 | A_95_P138782 FG141527     |
| 13938 | 164 | 83 | 346 | CAACCTGTGTGCAAGCGAGGAATTTGCTAAGTGTATTCAAGATTTAATATACCTGTA    | 13434 | A_95_P058041 BP134370     |
| 13948 | 165 | 8  | 298 | CGGCAGGAAACATCCACCACCTTACATTAACATGTTTCATGAATTTAAGGTGGAA/     | 13453 | A_95_P043051 BP130512     |
| 13951 | 165 | 11 | 515 | GAAACTGGTTTAGCAGCATAACAATTGAGGCATTGGTTCTTAGGCTCCATAGTATTC    | 13459 | A_95_P041451 TA15600_4097 |
| 13952 | 165 | 12 | 830 | ATTTATCATTATGATCAGTGCACAGTGGTGGTGGACTCACTTGCATCACAGTCAGCTC   | 13461 | A_95_P291613 FG143021     |
| 13955 | 165 | 15 | 416 | TTATGGATACACTTAGGGCATGGCGATAACGAACCTTTCATCTTGAGCTAAAGCGTC    | 13467 | A_95_P108677 CV018951     |
| 13966 | 165 | 26 | 888 | CCTATCAAATGATCTTTGGCAGGAGCTAATTGTGTGATACATAACAGTGTGTTACTT    | 13489 | A_95_P250407 Y11002       |
| 13968 | 165 | 28 | 575 | GGCTCAACATTTGAGAGTTAGTGGCGTTTGACATAACAAATGTGAAATTCTGGAAT     | 13492 | A_95_P066335 BP136573     |
| 13969 | 165 | 29 | 0   | CTGGGTGCTCTGTAATCCTAATAGCATGACTCATCTGTTTTTGTAAATATCATGATTTT  | 13494 | A_95_P018961 A_95_P018961 |
| 13973 | 165 | 33 | 815 | GTAACAGGCACATGGGAATATGCAAAGTATATCCATTTGCAATGGAATATAATTTGA    | 13502 | A_95_P179597 EB450661     |
| 13974 | 165 | 34 | 813 | GCCATATGTTCAAGTTCTCTCCTGATTTCTAGCACACTCGAGCCTTTTCTTGATTCTT   | 13504 | A_95_P244722 TA12753_4097 |
| 13978 | 165 | 38 | 489 | GTTGGGATATATAGTGCTATATATACCCAGCCTCATGGAATAAACTTTCATAGTTTC    | 13512 | A_95_P127907 FG625527     |
| 13982 | 165 | 42 | 240 | AGTCAACTTTGCTTTCTGTACTTCTACATGTATAATGGGAGGGAAAGTGGTTGTGCTTC  | 13520 | A_95_P142847 EB446260     |
| 13984 | 165 | 44 | 271 | ATTCGGGAAAGTATTTAGGTTGAAAAAGAGGGCACATCAGAAATTTATGCAATGA/     | 13524 | A_95_P077635 BP527301     |
| 13985 | 165 | 45 | 785 | GATGAATGAAATGATCATAAGAGGACACACACTCTCTCTCTCGTAAAGTAAAAGT      | 13526 | A_95_P269136 FG645381     |
| 13987 | 165 | 47 | 219 | TTTGATATGCTGGTGTGCTGCTGTGCGATTGCTTGGAACAGCTTACCTATACTCTTT    | 13530 | A_95_P112002 CV020471     |
| 13991 | 165 | 51 | 770 | TCGATCATGAAGAAGTCTTGTAGGAAAGATGATGCATTATCACATGCCAATTCTGCTT   | 13537 | A_95_P289253 DV158351     |
| 13992 | 165 | 52 | 262 | CCATGATGCTTGGGTCAATAACACTTTGATGCTCATTCTTCACTTATATTCTAACCA.   | 13539 | A_95_P028531 CV017661     |
| 13998 | 165 | 58 | 744 | GATTCTTAAGGGCTTGAACATTTCACTTGTAAATGTGTGTGTGTTTACTTGCTAATCC   | 13551 | A_95_P268736 DW005219     |
| 13999 | 165 | 59 | 108 | CTACCTGATTTAGATGTTGCAGAGCAAAGCTGTGCGATTGTGTTGTATGTTATTCTTC   | 13553 | A_95_P241450 AJ718321     |
| 14000 | 165 | 60 | 672 | GCGAAGTTGTAGATTTGGTTTTACAACCTGAATGGCTGCAATGTAGTGGGTGGCAAT    | 13555 | A_95_P015181 EB679266     |
| 14002 | 165 | 62 | 650 | CCATTTTGCTACTCTGATTGCTTCATAGGCGCTATTTGGTCCCTGTTAAACATTCTCTG. | 13558 | A_95_P189162 TA14731_4097 |
| 14005 | 165 | 65 | 993 | GACTTCTTAATAATGCTGGACAAGGCATGTAATGTGGTGAGAACTCCACAAATTCAC/   | 13564 | A_95_P210477 TA19406_4097 |
| 14011 | 165 | 71 | 746 | TCTCTATCGTACAAGTGGTGACAATTCTGTGTTGTACGACCCATGATCTGGAGAGTTA   | 13575 | A_95_P162457 TA16083_4097 |



|       |     |    |      |                                                              |       |                           |
|-------|-----|----|------|--------------------------------------------------------------|-------|---------------------------|
| 14014 | 165 | 74 | 103  | GGTCATGGAGGGGTGGTACTATGATTTCTGGGTCGTATTTAATGTCTTAAAATTTT     | 13581 | A_95_P237409 X68590       |
| 14015 | 165 | 75 | 625  | CGGTGTTTTGGGTAAGTGGCTTTATGTTTCGTTAATATATGCTGATCTGCATGTTTTAC/ | 13583 | A_95_P177977 TA12115_4097 |
| 14019 | 165 | 79 | 370  | ACATGTGTCGGTATGATAACATTGAATTTTGCAAGTGAATGGTTAAGGTGTGGTTC     | 13591 | A_95_P213127 TA19982_4097 |
| 14026 | 166 | 1  | 787  | ATGATATTCTTGTGGACGCACCTTGATCACCTTCCGGTGTGATTCTATTAGTCCAGC/   | 13440 | A_95_P136492 EB440257     |
| 14028 | 166 | 3  | 1307 | GGTGTAGATGGATCGTTGAATTTTACGTATAAAGTTTGCTGGAATAGCTTCTGCTTA    | 13444 | A_95_P189137 TA14726_4097 |
| 14029 | 166 | 4  | 322  | TGCTCCTTGTGCTGTCAACAATTGTATTTCATGTTAAGTTCTTTATGAAGTTGGGTTGAC | 13446 | A_95_P094738 BP532855     |
| 14031 | 166 | 6  | 306  | TTGATTTTGCTTTCTTATTCTCAATAATGATTACAGTTCGATGGTGCATCTCCGGTTTC/ | 13450 | A_95_P132962 EB433862     |
| 14034 | 166 | 9  | 813  | CCATGTCTTAGTTAAAGTTATGCTTATGAACTGATGAGCTACAGGTCAAGTTCATCA    | 13456 | A_95_P216972 TA20823_4097 |
| 14035 | 166 | 10 | 440  | TTTTGTCCGTTTACGAGTACGTCGCCGAATCAAGATAGTTCCAGCTCGATTCCAATC/   | 13458 | A_95_P107682 CV018489     |
| 14041 | 166 | 16 | 874  | GTGGACTCTAGCATCAACAAATCTGTTATAATAGAGAACCTTTTCTTCTGTATGAATC/  | 13470 | A_95_P009391 EB427816     |
| 14042 | 166 | 17 | 744  | GTTGCGCTTGAATTAATACATTGAATTGAGTACTTTTTATTGAGATGCATCCCGTTTTC  | 13472 | A_95_P012931 DV159000     |
| 14043 | 166 | 18 | 1025 | CAACTCGAAAGGGGTTACATTAGTCTGGGAAAAGATATTTTGTTTTGCTTATAATGG/   | 13474 | A_95_P011271 TA14015_4097 |
| 14046 | 166 | 21 | 803  | TTGAAATTTGGTGATGGCATGGAAGCTGTTGTCTTTGACCAAGCTAGTCGTTGCTGGA/  | 13480 | A_95_P015686 EB446842     |
| 14049 | 166 | 24 | 770  | CGAGGACTAAGAAAAGGTTTCTGTTCCATTCTATTTGTATATTTGACATATGCTCCCT/  | 13486 | A_95_P202012 TA17542_4097 |
| 14051 | 166 | 26 | 856  | ATGCATGGGCCAGTGTTCTACATATCCTAGTGGTGTATTGGGTTTCTTCTGTGTTCT/   | 13490 | A_95_P016286 TA20570_4097 |
| 14053 | 166 | 28 | 814  | TTACTTTGTAGTAAGATTGATGGTGAACATAGTTGTAGGATAATCGAACTGGTCT/     | 13493 | A_95_P013641 EB450467     |
| 14055 | 166 | 30 | 925  | GATTGGCTTCAGAATGCATCGGTAAATACTTTACAGCACCCTAAAAATGGAAGTC/     | 13497 | A_95_P028981 EB680234     |
| 14058 | 166 | 33 | 521  | CATTGGTTTGCTCCTCCTATGTAATTTAGATTATTAACGATTTTAAATGGAGGAACAC/  | 13503 | A_95_P091728 BP531478     |
| 14060 | 166 | 35 | 553  | ATTTACCAAGAGCGTCACACAATGGTTTACCAAGGATGGAGTTCTTGTGGAGGGGCT    | 13507 | A_95_P034364 FG636765     |
| 14063 | 166 | 38 | 291  | GCCGGATTTTGTTGCCGGATTTTAGGGTAGAATTGACATCAATAGCTAGGTCTGG      | 13513 | A_95_P062875 BP135632     |
| 14066 | 166 | 41 | 884  | TCTCAGCAGAAAAGGCATTCATGAACAGCTTTCTGTCCCTGAAATAACAAATGCAGT/   | 13519 | A_95_P298453 FG142676     |
| 14068 | 166 | 43 | 678  | TTCTACCCTTTGTTGGATGTTCTACTGGGATGCTGAGATATTAAGACTTTGTTACCTTA  | 13523 | A_95_P124102 EB443533     |
| 14077 | 166 | 52 | 681  | GCAACAACAAGTTGGATTTATCTCGTCTTACTCGCTCTTCTTCTATTTGGATGGGCAA/  | 13540 | A_95_P145377 EB425395     |
| 14079 | 166 | 54 | 1534 | GCCTGATACCTGCAAGGGGGTCTTACCCTTAATTTTATTTTATGTATTTGATCTATC    | 13544 | A_95_P011241 U84972       |
| 14082 | 166 | 57 | 797  | TTGCATCGGAACACCATTTGGTTCAGCATGGCTAAAAGAACTTTCTTGAAGGATA/     | 13550 | A_95_P207342 EH618818     |
| 14085 | 166 | 60 | 510  | ATTAATTTGCGAGTCGTGATGAGTAATCAAATCCAAATATGCGCAGTGGTCCAGAG     | 13556 | A_95_P149027 EB678689     |
| 14086 | 166 | 61 | 513  | TTTTGTTGTAGCGCTGGCCACTAGCTACCACAGCTTTGCTGTATAAAAGAGATGTCAA   | 13557 | A_95_P304423 FG645419     |
| 14091 | 166 | 66 | 142  | CTATAGGCTGTATCTTGAACGCTCAAACATTTTGATCCTTTATGGAATTTGTTCTTTG   | 13567 | A_95_P031926 EB435446     |
| 14092 | 166 | 67 | 769  | GTAAGTGAAGATGGGTGTCAGCAAGGCTTACTTTTGTATCCATCGACTGGTGTATGT/   | 13569 | A_95_P205062 TA18200_4097 |
| 14095 | 166 | 70 | 673  | ATTCTGGCTATTTTGTTCAATTTCAAGATTCCTGTGCTCGGAAGACCTTTTGTATCAATA | 13574 | A_95_P314973 FG179245     |
| 14096 | 166 | 71 | 62   | CCACGGTTGTGGATTATTGTTTCAGTTTGTAGCATTAAATTTATTGATGTTGTAGGG/   | 13576 | A_95_P160817 EH619517     |
| 14098 | 166 | 73 | 208  | TGGGTTTCATCACTTACTCTGATCCCACTGTCGTTGACACTGTTATTGCTGAAAACCTTA | 13580 | A_95_P157042 EH615090     |
| 14099 | 166 | 74 | 164  | GATTTCTTGGTGGAGCCACAGCTATCTGGGTTCTTTGAGGTAGTAGAATACCATTT     | 13582 | A_95_P156277 EB680718     |
| 14102 | 166 | 77 | 848  | ATAATGCCTTTGCGATTCTCATGTTGTGTTGAGTTTGTCCACTTAGGTGTGTATTTT    | 13588 | A_95_P117817 DV160787     |

|       |     |    |      |                                                                |       |                           |
|-------|-----|----|------|----------------------------------------------------------------|-------|---------------------------|
| 14105 | 166 | 80 | 481  | TGAGTTTATCCCTTTTGAATTGGATTGTTACTACAATGTTATTTCTATGTGGTGGTTC     | 13594 | A_95_P020571 TA12507_4097 |
| 14107 | 166 | 82 | 410  | AAATAATCTCTCTGGGATCAGACTGGCTCTCGGCTTGAGCATTGTACATAGGTTGA/      | 13598 | A_95_P204552 EH621290     |
| 14108 | 166 | 83 | 467  | ACTAATTGTGCACTACAAATTGATCTGATTGCTGCAACTTTTGAGGAACCACTCCG       | 13600 | A_95_P006381 BP532606     |
| 14109 | 166 | 84 | 836  | TAGAAGGTATTAAGCAGTTTTATGTGAATGTAGATAAAGGAAGAATGGAAGCTTGAG,     | 13602 | A_95_P182363 X79135       |
| 14111 | 167 | 1  | 473  | TGGCTGTAAATGTCTACAGCAAACACTACCACATAAACTGAAAAAGGTTGAGAAAAG      | 13605 | A_95_P134212 EB436283     |
| 14112 | 167 | 2  | 481  | TTGCTGGCCCTGATATTATACGTCTCCCTAGATTATTCCGATTTCTCCAACGCCATTA/    | 13607 | A_95_P034893 TA14479_4097 |
| 14118 | 167 | 8  | 811  | ATCACTCATCCATTGGCAGGTTTCCTAATGCACCTGGTGCTATGATTTACCCATTTAT     | 13619 | A_95_P208472 TA18976_4097 |
| 14130 | 167 | 20 | 660  | AGTGGTTGTGGTATGTCACCTGTCTTAGTTAGCGTTGTTCCAGTGTCTGCTTGATT(      | 13642 | A_95_P067315 BP136837     |
| 14133 | 167 | 23 | 364  | TTTCAGAATGCCAAAGTTCATCTCCTAAAGGTCGAAGCAGTAGTGATAATGCACAAG      | 13648 | A_95_P064065 BP135947     |
| 14135 | 167 | 25 | 2087 | TTCTGGGGTTTGTATCCCGTGAGGGTATTCTGCTAGTATTGCTTGTTCATAAGATTGT(    | 13651 | A_95_P015376 TA15967_4097 |
| 14136 | 167 | 26 | 247  | GCTCTGTAAATGATTTGCTTGTCAATCATTAAGTAGTTCAATGAGTTCCTCCTTTCAA     | 13653 | A_95_P110977 CV019992     |
| 14139 | 167 | 29 | 199  | CATTGAGGATTCTACGACGCTCTTGAGATCATTGACACATTTGTTCATTTTTCATTTCT    | 13659 | A_95_P111027 CV020010     |
| 14140 | 167 | 30 | 504  | GAACTTGAATAAACTTCGGTTGTAATGTTGTATGTCTTTAGCTTGGTGTTAATGTGG      | 13661 | A_95_P299468 FG645576     |
| 14145 | 167 | 35 | 795  | AGTTGCAATTGATGGAAGTGGACAATAAAGAGTATAAATGAGGCACCTTAATGCTGT(     | 13671 | A_95_P196497 TA16352_4097 |
| 14154 | 167 | 44 | 821  | TAATAAAAGCTGGTTTGAGTGTTCGTCTTCTATTCCCTGTATGCTGTAAGTGTATTAC     | 13689 | A_95_P146382 EB450422     |
| 14157 | 167 | 47 | 830  | TGTCTGTTAAGTTAGAGGAAATGGAAAGATTTGCTCTGGGTACAAATCTTATCCTGA(     | 13695 | A_95_P227639 EB427690     |
| 14159 | 167 | 49 | 872  | GGTGGTTCTCCAGTAGATCAACTCAAAGCCATTACTCCGCAACTAGTAAGATCAAT       | 13699 | A_95_P229644 EB450979     |
| 14163 | 167 | 53 | 764  | ACACCATTAACTCTGACACAGCTGTCTTCTATTGGCATATAATTACAAGTACGTTTTC     | 13707 | A_95_P188362 DV158374     |
| 14164 | 167 | 54 | 1611 | CTGTGGTATGGAACCTGTAATAATACTTGTTCATCTTAAGCAAAGATTCACTTA(        | 13709 | A_95_P010496 AJ319873     |
| 14165 | 167 | 55 | 771  | TTCATGGTTCTGTTCTGTGGGAAGGGTGCCAGCTTTGTATAACAAATCGTATTATTC      | 13711 | A_95_P209817 TA19270_4097 |
| 14177 | 167 | 67 | 848  | AAGCTTGTTGGATGGTTTGATAGCCATGTTGTTGATTCCAAATTGATATTCCACTA/      | 13735 | A_95_P233729 EB432598     |
| 14179 | 167 | 69 | 2242 | CCCTGTCCTAAGTCTATGCATTTCCCTTTGATAGTGTAAGCTAAAGCTATGTCATTATTA   | 13739 | A_95_P018241 AF435451     |
| 14180 | 167 | 70 | 243  | GGGCTACCCATGGCATTGTAAGCAAAATTTAGAAGAATGTTAACTAGGAAATTTCA       | 13741 | A_95_P132367 EB432845     |
| 14183 | 167 | 73 | 803  | AGTGATCTTATCCTTTCCAGAGCTCGATGTGGATCTCGAGAGTCGAGAAAATGACG.      | 13746 | A_95_P292308 FG135867     |
| 14185 | 167 | 75 | 844  | GTTTGCACAGTACTGATGTCAAGTAATGCCAAAGTTTATTGCGCTGTGTTGCAGTCTT     | 13750 | A_95_P310073 FG134932     |
| 14189 | 167 | 79 | 756  | GGACATGTGATTGAAATTTCCAAGTGGATTTATGATTCGACATGGTAAACATCCTC       | 13758 | A_95_P013851 DW000482     |
| 14191 | 167 | 81 | 838  | TTTGTGCCTGAAAGCAATATCAAGCATAGTAATACCATTCCCTTTGGTCTCTGTTGG/     | 13762 | A_95_P014656 DV160066     |
| 14193 | 167 | 83 | 749  | GCCGTAGAAAATCCTATGCCCTAAGATCCGACTGTGTATAGACTTCTATAGTTACGAT     | 13766 | A_95_P184222 TA13643_4097 |
| 14207 | 168 | 12 | 453  | AAGACCACTTCTTATGAGGAGGAAGCACTTAGAACCATGAAAGCATTTTGGCTGCCT      | 13628 | A_95_P039116 BP129459     |
| 14209 | 168 | 14 | 708  | CTTCTTTATGTCAATTTCTTCTGCTTGTCTCGATAGCTGCTTCTTTTTCATGGATTGAGCA( | 13632 | A_95_P135417 EB678847     |
| 14230 | 168 | 35 | 478  | GGATCTGCTTTGTATGTAATGTCTAATTTGCACCTGCTATTTTGTGCTTCAGCTTTCA(    | 13672 | A_95_P276598 AM801363     |
| 14232 | 168 | 37 | 735  | TTAGCTAACAGTAGAACTCTGCCACAAACAGTTGGGGCTGTAGATCAAAGGCAG/        | 13676 | A_95_P160582 EH619262     |
| 14233 | 168 | 38 | 825  | CTTCACTGCACAGCGTATGTCTTTGACGAAATGATGGTTTCTTCTACCTGTCATTTGA     | 13678 | A_95_P136167 EB439795     |
| 14238 | 168 | 43 | 839  | CTTGTGCTCGATGTTCTAGCACTGGAGCTCTGTTCTTATCGAGCTGTTCAAAATTT       | 13688 | A_95_P012461 DW000246     |

|       |     |    |      |                                                              |       |              |              |
|-------|-----|----|------|--------------------------------------------------------------|-------|--------------|--------------|
| 14239 | 168 | 44 | 756  | CAAGAGCTGAGGAGAAGAAGGCATTGGCTTACCAGAAAAAGAAGACTGTAAATATC     | 13690 | A_95_P148337 | EB677622     |
| 14240 | 168 | 45 | 806  | TTAAAGTGAAC TAGAACCTTGT CAGTCATGGTATTTTCCAACGAGAATGATACCAAAC | 13692 | A_95_P117447 | DV160357     |
| 14244 | 168 | 49 | 570  | TGTT CAGCTACTGTAGTGGTAAACGCATACTGCATTACCCTTACTGTCTTCCATAAGG  | 13700 | A_95_P153322 | EB683615     |
| 14247 | 168 | 52 | 259  | CTGGCCTGAAAAAGAGCGGACAGAAATGAGAATGTTATATTCTTCCCTCCTAGTATT    | 13706 | A_95_P105707 | EH616159     |
| 14248 | 168 | 53 | 549  | CATGGTATAGTCGAGACCTTTCTTGTTTTCCATTATATTAGTAGCATTTTTATTCTGGG  | 13708 | A_95_P214407 | TA20257_4097 |
| 14249 | 168 | 54 | 321  | GTTGGATAAACTTAGAGAGCTGTCTATTATTCACTGAAACCCGTGTTTGTTAGCTGGT   | 13710 | A_95_P106162 | CV017781     |
| 14254 | 168 | 59 | 762  | AGCACAGTCAAGAATGTTACTTCTGTTATTATAATTAAGTGTGCCCTATATTTGCC     | 13720 | A_95_P012791 | TA12536_4097 |
| 14257 | 168 | 62 | 869  | AACTGGTGAGAATAGCCTTGGTGCTGATAATGATCCTAAATACATAAACATTGGCAA    | 13726 | A_95_P126422 | EB425749     |
| 14258 | 168 | 63 | 788  | ACGATCAATCTTCTTGAGTTCAAGAACTGCTGCTCATTGCTGCTTACTGTTTGTGTA    | 13728 | A_95_P191327 | TA15212_4097 |
| 14261 | 168 | 66 | 468  | GATCTTGGTTTTTCGCTAATAAGCAGGACCTTGAAAGGAGCAATGACCCCATGCAA     | 13734 | A_95_P163267 | EH622281     |
| 14263 | 168 | 68 | 463  | AGCCATGTCAGCTCAAATCCAAAGTAGCAACTCCATAGTTAAATGCTAACAAATAAG    | 13738 | A_95_P274703 | AM791671     |
| 14265 | 168 | 70 | 718  | AGAGTCCGCGACTTGGCTATGCCTGAGTTTTGTACTAGTATATATTGGTTTTTCTTCC   | 13742 | A_95_P122477 | DW002444     |
| 14268 | 168 | 73 | 862  | AAGATGCATTTGATCTGAAAAAGACTGCTCAGAGGCACACGTTTGGCTGAAGCAGTT    | 13747 | A_95_P227089 | FG155288     |
| 14270 | 168 | 75 | 887  | GCTGCAAATTAAGCTTATGATCCTTGGATATTTAAGTTCACCAGTGTATTTGTTGTG    | 13751 | A_95_P195647 | TA16163_4097 |
| 14271 | 168 | 76 | 755  | TAGACTGAGATGTTAGTCTTCGGCAGATCTCTAAGCTAAGATTTTCACTTTTATGAGA   | 13753 | A_95_P136272 | EB439961     |
| 14273 | 168 | 78 | 524  | CTCCAGTATACTGTTTGTATTGCTTACTTATACAGTCAATTACCAAGTTGCCTTAGAA   | 13757 | A_95_P151142 | TA21558_4097 |
| 14276 | 168 | 81 | 878  | GAGGAAAGAGAATGAGGAAAGAGGTTTTGGCAGTTGCTCTTATTTTCTTCTCAA       | 13763 | A_95_P206342 | TA18493_4097 |
| 14277 | 168 | 82 | 767  | TTTGTGAGGAGAGCCCTCTCGTATTTGATAAATGGCCAGCCAGAAGTTGCATTGAGA    | 13765 | A_95_P145752 | EB449496     |
| 14278 | 168 | 83 | 0    | ATGTAATGCTAGCTCGTGCTGCTCCTATGACATTTGAGCGCAGTCAGAGTGGTTC      | 13767 | A_95_P313888 | A_95_P313888 |
| 14280 | 168 | 85 | 137  | GTGCTTGATTGTTAGATTTCAAGGATGGGTATGATGATACCTTTTTGAGTAATTAGCC   | 13771 | A_95_P111517 | CV020242     |
| 14282 | 169 | 2  | 754  | CTAATATGATGAACTTTCTCCTAGGGTAGAAATCTTAGTCGGATGAATCTTCTCCTA    | 13774 | A_95_P119787 | DV999343     |
| 14283 | 169 | 3  | 694  | GTCGATGATGATTTGAAGCAGCTATTCAGAGGTATTGAATTACCACGTGACATGCTT    | 13776 | A_95_P073715 | FG174018     |
| 14284 | 169 | 4  | 438  | TGCATGCCATCAAAGTGCACCTTGAATAGAAATCACTTAATGTTTTTCGCCTCAAAA    | 13778 | A_95_P091823 | BP531510     |
| 14286 | 169 | 6  | 160  | TTAATCACGTTACACGATGATGATGATGAAAGTATGTTCAAACCTTTGCCAGTGGG     | 13782 | A_95_P023446 | EB445713     |
| 14287 | 169 | 7  | 815  | GTGTTGTATGCATTAGTTAGAAGTGTGATTTTGTGTCAAACCTTATCAGACAGCTTGA   | 13784 | A_95_P218762 | DW000456     |
| 14289 | 169 | 9  | 470  | GTGGAAGTGTCTGCAGTTGCCTTTTCTGATCTTTCAGCTTCGATTTATTTATATT      | 13788 | A_95_P198812 | TA16860_4097 |
| 14291 | 169 | 11 | 545  | AGCGTCTCTGTCTGGAATATGCTGTTCTAGATTTTGAATTAACAAATCAAGTATAGAG   | 13792 | A_95_P203337 | TA17833_4097 |
| 14297 | 169 | 17 | 479  | TGTCAGAATTAGTATTGTAATGCAACTGTAATAAACTCAATCTTCTTAGCGGCCGC     | 13804 | A_95_P266106 | AM793907     |
| 14300 | 169 | 20 | 175  | TTCTTGAAC TCAAGATCGATTGTTTGAATGATGTCAATTGGACTGGGGCCTACGTATT  | 13810 | A_95_P162737 | EH621737     |
| 14301 | 169 | 21 | 424  | AAGAGATCATAGGGATGGATCACGTCAAATGGTGGTTATGAAGAGTTAGAAGATG      | 13812 | A_95_P073895 | BP526333     |
| 14302 | 169 | 22 | 640  | CAAGACTTTGATATATCTAGCTGCTTCTGCTTTCTGCTGAAGTTATTGCTGATTGTTG   | 13814 | A_95_P163452 | EH622499     |
| 14305 | 169 | 25 | 706  | AATGATGGATGATATTCTGATGGAATTTTGGAGCCGTTGGAGGTAGAATGTGTGCTAT   | 13820 | A_95_P207402 | TA18733_4097 |
| 14306 | 169 | 26 | 856  | GTCAGTATTGAACCACAGAACTTTCTGATCTGTTGAGATTCAATATTGGAGGATTA     | 13822 | A_95_P228324 | EB678983     |
| 14309 | 169 | 29 | 1384 | CCCTTTGTCCCAAAC TAGTTGTGCTAACTTGAATTTGACAGTCAAACCTGTAATAAT   | 13828 | A_95_P198147 | TA16716_4097 |

|       |     |    |      |                                                             |       |                           |
|-------|-----|----|------|-------------------------------------------------------------|-------|---------------------------|
| 14314 | 169 | 34 | 301  | TCGAAGCCAGCACTGCCTCGTGAAAAACCTCTGACCTTTAAATATACGCTATATGCAT  | 13838 | A_95_P015626 EB444079     |
| 14316 | 169 | 36 | 860  | GTATTCTGGTGGCCTGTACAAATCATAAGGGTTGCTCCTAAAAATTTCTTTCTCTT    | 13842 | A_95_P222577 DV999307     |
| 14317 | 169 | 37 | 783  | TGTCATGAATTACTTGGTGGAGCCAAATGGGATGAAATGGACTTCCAACCTTCTGAAA  | 13844 | A_95_P022356 EB450549     |
| 14319 | 169 | 39 | 574  | GCCCGTCGTCCGAATTCATGTAGATGGTATGTACATTAGCACATAAAAAATAGTACA   | 13848 | A_95_P042796 BP130449     |
| 14320 | 169 | 40 | 480  | GTTTAAGCTAGGGTACTTTAAGTTTCTGTTGTTAAGGTCTGGATATTGTAATTCCTCG  | 13849 | A_95_P006061 FG635626     |
| 14323 | 169 | 43 | 704  | TGAACCTTGAGATTGAGAAAACATCTTTATGATCTCGGCGTATGATTCAATTACCATG  | 13855 | A_95_P118217 DV161237     |
| 14324 | 169 | 44 | 462  | AATGACAGATTAGGTCTCAACGGATACTATGCTGGGAATGGAAATCTTACATTCCAG   | 13857 | A_95_P281903 AM789234     |
| 14331 | 169 | 51 | 121  | AATTTAAGGGTTGAGACATGTGTTTTAAATATGCATTGTGGTACGATGATTTGCTTTG  | 13871 | A_95_P031086 TA19607_4097 |
| 14334 | 169 | 54 | 504  | CAAGGGGGTTCAAATCTACATAAGGTCATGAGTTCAATCCCCTAGATACAAAAT      | 13877 | A_95_P001486 BP129233     |
| 14335 | 169 | 55 | 683  | ATTCTGGTGCTTAGGTTCTAGATTCTGTTGTTCCACTTTTCTTCTAGATTTATGGCTC  | 13879 | A_95_P238879 AB032528     |
| 14336 | 169 | 56 | 874  | CACCACCCGGGAAAGAAAAAGGAAGTCCTATGTATATCATCAAATCCAAAACCACC    | 13881 | A_95_P222872 EB439038     |
| 14339 | 169 | 59 | 880  | CCCCTAGCTTTGAACGTTTTCTCTCTAAATGTTTTCTCGCTTCTCAATTGACAGAA    | 13887 | A_95_P183602 TA13496_4097 |
| 14342 | 169 | 62 | 1962 | CGAGCACTAGCACTTTCTTTTAAATGTAGCCTTTGCTGAGTAACTGGATAAATAAAT   | 13893 | A_95_P186637 TA14169_4097 |
| 14343 | 169 | 63 | 834  | TTGCGATCAGTTTACCGTCATGGTGGTACTAGAAGTGTGCTTCTGAGTACCATTCA    | 13895 | A_95_P148967 TA17097_4097 |
| 14344 | 169 | 64 | 723  | TCTGGACATGACTGTGGGCTTAACACTTTCTTTATAGTGATGACCTTATAGTCATCT   | 13897 | A_95_P139282 EB680583     |
| 14352 | 169 | 72 | 278  | GTGCTGCAAAACTGTTTTGACTGAGTTATTTGGTTGCAACCTCTATTTTCAACAAGT   | 13912 | A_95_P100688 BP535484     |
| 14353 | 169 | 73 | 437  | ATTACCCTCTTCTCGAGTCCCTATATTGATCCATTGAAGCTTGAGAACGTTGTAAAGA  | 13914 | A_95_P120037 EB427837     |
| 14354 | 169 | 74 | 762  | GCAAGGCATCCAAAATGAAACCAAGAGTCTGAAAAATCTCTCAAGGATGTGGTTAC    | 13916 | A_95_P240678 EB427259     |
| 14357 | 169 | 77 | 790  | TCGCAAAGTGTGTTATGTGCGAGATAACGAGAGAAAAATGTTTGTGATAAAAAATTA   | 13922 | A_95_P117387 DV160311     |
| 14365 | 169 | 85 | 871  | TCTTTTCATAGCAACTCTGATCCTCGTATATTAATTGATGGTGCCCAATATTTTGAACC | 13938 | A_95_P014481 TA16928_4097 |
| 14369 | 170 | 4  | 1585 | AAAGACAACCTTCTGTTTTCTGATTTGGAGAAATTAATGGGTGGAGCTTTTGCATGG   | 13779 | A_95_P202372 AJ344537     |
| 14370 | 170 | 5  | 211  | CACAGATGTATATCTTCCACCAGTATAAATGAAGTTCTTTGCTACCTCAGCAAACCTC  | 13781 | A_95_P133092 EB434217     |
| 14371 | 170 | 6  | 224  | AGAAAGAGCTGGAGAAGTCAATGAAGAAGCCGGATAAGAAAGCTAATCGAGTCGC     | 13783 | A_95_P126852 FG624146     |
| 14373 | 170 | 8  | 615  | TAAATTAGGTGTTGATGGATGATATTAATGCTGGTATGAGCGCTGCGAGTTGCAGGT   | 13787 | A_95_P046916 BP131521     |
| 14376 | 170 | 11 | 350  | GGTTGCGGTATTGTGTTAGTTTGTAGATTTTAAAACTATTGAAGTCTGTTTCCCTAA   | 13793 | A_95_P001911 FG642183     |
| 14377 | 170 | 12 | 1515 | ACACCTTTAATGAGTGCTCGTGTAATTTTCTATGAGGTCACGACTCTATTTTGATTT   | 13795 | A_95_P176807 AJ007496     |
| 14378 | 170 | 13 | 783  | TGATGACTTGCATCTTGCAACAATGAGCTTGGATCTAGCTGTTCTAGTATAGTAATAT  | 13797 | A_95_P189507 DV999471     |
| 14381 | 170 | 16 | 721  | GCTTGCTGTTTACTTGAGGAGAAGTTTGAATCATCAACTGCTCTATCATTGTATTTCT  | 13803 | A_95_P248702 EB440103     |
| 14382 | 170 | 17 | 795  | CCAAATCTAGCAGTGGCTATTGTTGGATGTTTCTGATATTGAGCTATACTAAAGATTG  | 13805 | A_95_P012911 DV159784     |
| 14386 | 170 | 21 | 755  | AAGTGTAACGAGGGAAAGGGATCAGGTTAACAGCAAGCTCCGAAGATCAGAGTC      | 13813 | A_95_P258251 FG156089     |
| 14388 | 170 | 23 | 1295 | GGTTTGAGAGCTTTTTGTTAGTCGATAAGATTGTGTTCCATTATTTCTCTTTGAAA    | 13817 | A_95_P007571 D26509       |
| 14398 | 170 | 33 | 827  | TTTGAGACCCAAATGCTAGAATCTATCTACGCCCTCACATGGTGGGAAAGCTTTATCA  | 13837 | A_95_P310588 FG158077     |
| 14400 | 170 | 35 | 156  | TTTCTCCCTACCCTATTTTTCGGAAGTAAGCAGTGGTTTTCGATAAATTATCGGGGT   | 13841 | A_95_P065160 BP136258     |
| 14408 | 170 | 43 | 219  | CAGCCCTACTCCTGGCTTCATAAACTCTTTCCCAAATTTGTTTACACTGAATTTTCA   | 13856 | A_95_P069530 BP137409     |

|       |     |    |      |                                                             |       |                           |
|-------|-----|----|------|-------------------------------------------------------------|-------|---------------------------|
| 14414 | 170 | 49 | 380  | GTAGTATTCTGTAGTAGTCTGTGAGCTAGTGACACCAGACTCTGGGTAGCATTTTGG`  | 13868 | A_95_P144027 EB447213     |
| 14415 | 170 | 50 | 245  | GTGTTGTGATGGAACCTTTATCATCAATCAAGGGTGTTCAGCGTGATATTGAATTTTA  | 13870 | A_95_P131727 EB432113     |
| 14416 | 170 | 51 | 592  | AAACTGGTGATTGTACTATGGTACTCTTTCTTATCCAGTTTAGGTCTCTCTTTTCGATT | 13872 | A_95_P091548 BP531408     |
| 14419 | 170 | 54 | 855  | CAAAGTACATTATGATGGCAGACCTCTTTAGAGAGATCCTCAAAGTTTATGTGTTGTT  | 13878 | A_95_P269926 EB428013     |
| 14424 | 170 | 59 | 785  | AATGATGATGGAGATGACGTGATGTCTCCACCTTTTTCTCTCTTTTCTGCCTCCGTGC  | 13888 | A_95_P195462 EH623218     |
| 14427 | 170 | 62 | 729  | CGTGGTTCTTTATCTTTGAGAAAATATCTTTTTCTGTTTGAGTGCAGTTTCTTTGAGTG | 13894 | A_95_P126972 EB426380     |
| 14428 | 170 | 63 | 815  | GATGGTCTGCTTTAGTAATCGTTATATAAATTTTTCTCTAGTGGAAGTGGGATTCTT   | 13896 | A_95_P012231 EB439212     |
| 14433 | 170 | 68 | 630  | AAGAAAGTGCAGCAGCTCTGAAACCGAAGAAACGCCATTTACGAACAAGAAGAAG     | 13905 | A_95_P097898 TA13766_4097 |
| 14437 | 170 | 72 | 1465 | GAGGTTGTTTCCGAAGACCTCAGCTCATATTACAACGTTTGAAGATCTATTTGATG    | 13913 | A_95_P190532 TA15036_4097 |
| 14443 | 170 | 78 | 316  | CTCCTGATGATGTTTTGAAGCTGCTGGATCGCTTCTACAACCTGGAAATGGTGAACCC  | 13925 | A_95_P051966 AM829948     |
| 14445 | 170 | 80 | 133  | CGGTATGTACATGAAATGAAGCACTATTAGTCGTTGCTTAATCACTTCCCTTTTTTCAA | 13929 | A_95_P088843 BP530241     |
| 14449 | 170 | 84 | 570  | ACTTTCCTACTTTGTCAGATGGCTGGTTGAGTTGGTTATGTACGAGGATAGTTTCTGA  | 13937 | A_95_P022466 TA13628_4097 |
| 14453 | 171 | 3  | 737  | GAAACCAGTTTTTGTTCAAAATCTGAGAGAGACCCATAGATGAGCGTGAGAAGCC     | 13944 | A_95_P204812 EB438536     |
| 14456 | 171 | 6  | 861  | AGGTTGCATTAGTTATTTCTTTAATGGTCTTCTCTTCCCAGCATGTAATATTTACAT   | 13950 | A_95_P227004 EB678186     |
| 14460 | 171 | 10 | 781  | ATTGCTTATTAGTGGCTGAACCCATGAAAATTTGCGTTTGGTTGATCACCAAGTCTT   | 13958 | A_95_P177217 TA11914_4097 |
| 14463 | 171 | 13 | 1949 | GACTGGCTTTTTATGTGAGGTACAGGATGTTTTATGCGGTTATATCTTTGCTTAAGA   | 13963 | A_95_P030886 TA15238_4097 |
| 14470 | 171 | 20 | 578  | CCTTGGCTTGTGGACAGTATAACATGTGCCTTACCTAAATAGAGGCAGAATTTGTTTT  | 13976 | A_95_P244347 FG640417     |
| 14474 | 171 | 24 | 25   | ATACGAGCTCATTATCTAATGAGGAATCAGCAAACCTAGCAAGTGTACTTCACTTTC   | 13983 | A_95_P034044 BP129575     |
| 14475 | 171 | 25 | 302  | GACGAAGAAGACTTGAGCAAGTCATGCATGCAAGGAGTTAAAATTTCTTTGTATA     | 13985 | A_95_P090233 BP530869     |
| 14479 | 171 | 29 | 485  | TGATGCAGCAGAAAAGAATCCTGTTGAGATGCCTAATAATGTCGCTACGAAGGCT     | 13993 | A_95_P083280 FG164240     |
| 14480 | 171 | 30 | 203  | GCCGAGACACAGGATTCATACAAAAGACATAGCTACATATCTTATGTTGTTGTTAATT  | 13995 | A_95_P033294 AJ344603     |
| 14485 | 171 | 35 | 971  | GCCCTACAAACATTTGTGTTCTAGGTTCTTGTGAACCTATAGCTTTTTGTTAGGATAA/ | 14004 | A_95_P183302 TA13426_4097 |
| 14489 | 171 | 39 | 557  | CATCATGGGAGAAGCCATGAAAGGTTCTGGGTTACGCTTGAAGATGAAGAATTGG     | 14012 | A_95_P301718 FG640148     |
| 14492 | 171 | 42 | 737  | AGAGTCTGATAACCTCGTGGACCAAGAAGAATTTCTGCTACAGGAACAGGTATAGG    | 14017 | A_95_P148802 EB678313     |
| 14495 | 171 | 45 | 555  | TTTTAGATCTTGTCTCTCTTAAGAGGCATATTTGCTGGTGTAACTCTAGATGGTGT    | 14023 | A_95_P006126 BP528513     |
| 14498 | 171 | 48 | 761  | CCTTTGTCTGCCATGACATTGGCTTATTGTAATCTGTAGCCATTGTTACTCTGTACAA  | 14029 | A_95_P264296 FG144751     |
| 14499 | 171 | 49 | 303  | CGATATCCTTCCCTTCAAGAATTTCCACCTATATAAATGTGAACTCATTAGTTTTGGT  | 14031 | A_95_P093188 BP532173     |
| 14502 | 171 | 52 | 600  | GGCGTTGCTTTCTTACTTGGTGGCTTCTTTATTCTACTCAAATATTTGGGATATTTACT | 14037 | A_95_P019876 TA12236_4097 |
| 14506 | 171 | 56 | 827  | TTGATTCTACAACCAAAGCAATCCTTCAGGAAGCAGTCAAAGGAGAACTCTGGCGTT   | 14045 | A_95_P259351 EB428843     |
| 14507 | 171 | 57 | 820  | CCAAATATGGCCTCTGAAGACTTCATGACCAGGAACCCATTTCCAGTTTCCATTTGGAG | 14047 | A_95_P297243 TA14721_4097 |
| 14509 | 171 | 59 | 572  | TGACTAATGGTGTGATGAAAGGTAGAATGGCCTGGAAGGAGCTATCATTGATATTC    | 14051 | A_95_P261961 FG641103     |
| 14510 | 171 | 60 | 486  | TCCTGAATGGGATTTAACATGCATGCTTTGTGGCTAAAAGAATGGCCCTTCTCTGA    | 14053 | A_95_P293158 FG638602     |
| 14511 | 171 | 61 | 728  | ATGAGTGAAGCAAACAACAATGGCATGGACTATTCAACTCCCAAGTACCAGGCCTTT   | 14055 | A_95_P221957 TA21929_4097 |
| 14512 | 171 | 62 | 748  | AACTGATGATTTAGTGCCGCTACAGCAACTGTTGGTTGATCAGCCTAACATCCCCAAC  | 14057 | A_95_P161257 EH620008     |

|       |     |    |      |                                                              |       |                           |
|-------|-----|----|------|--------------------------------------------------------------|-------|---------------------------|
| 14524 | 171 | 74 | 759  | TGTGCTCTCAAGGATGCTCGGGGTTGGTGTATCATCCTCAAGGACAATATCTATTGA/   | 14081 | A_95_P193537 TA15694_4097 |
| 14530 | 171 | 80 | 447  | TTAAGCTCCCGTCCCCCTAAAAAATCAGAGTACACCACAAGGGATTATGGCAAAAAG    | 14093 | A_95_P163662 EH622753     |
| 14534 | 171 | 84 | 827  | AATGTTCTGAACTGTGAACTGTAGATGGACATGTACCAAGTAATAACTGTAAAGTTTC   | 14101 | A_95_P289183 DV157974     |
| 14536 | 172 | 1  | 587  | GGGTAAGGAACATCTTTCTAAGGGAGTTTTGATTTTGATGCGGACAGAAACCTAATC    | 13941 | A_95_P047551 BP131685     |
| 14538 | 172 | 3  | 540  | TATTTGAACCCTATATGACATGGGACCTTTTACTCTTTTGGCTCAGTGCCTTACAGAC   | 13945 | A_95_P073775 BP526298     |
| 14541 | 172 | 6  | 535  | GTCAAACCTCTGTTACTTTTTCGGAGAATTAGGATTTGGTGCTTAGTATCTGTTATGAAA | 13951 | A_95_P027691 EB445484     |
| 14542 | 172 | 7  | 793  | ACAGCTTCGCCTGATGTCATACCATGTACCTCGAAAGATATTGATATCAATTTTAGTT(  | 13953 | A_95_P198532 EB445932     |
| 14545 | 172 | 10 | 672  | CTTTGCTGTATATTATTCACCTTTAGCATGTCAATATACACATAGTTGAAACACACGTC  | 13959 | A_95_P304458 FG635717     |
| 14546 | 172 | 11 | 805  | CTATAGTCCAGCTGCCAGTTGGTGTCTGTTGGAATGATTATACATGGTCATACTCTT(   | 13961 | A_95_P120622 DW000590     |
| 14548 | 172 | 13 | 631  | CGAATACTTGGATTATGAATCTCACAGAGGAATGAATATTTTGTAGCGAGGAAACCA    | 13964 | A_95_P116292 DV158972     |
| 14549 | 172 | 14 | 846  | TTTCTGGTCGTCGGTCTGGATTCTGATTTGGCGAATGACTGGATTCAAATCATCGTCG   | 13966 | A_95_P012901 EB451168     |
| 14550 | 172 | 15 | 204  | TAACCTTTTGTATATTTTTCGTGACTCTAGGTTGAGGAGAAGGGAGGTTCTGCTAA     | 13968 | A_95_P049541 BP132189     |
| 14551 | 172 | 16 | 513  | TTAGGGTTATTGGGTAACCTAGGCTTATCTGGGAAATTTGGGAAACTAGTTTTCTTCT   | 12052 | A_95_P000101 FG167017     |
| 14552 | 172 | 17 | 475  | AATCTACTCTTTTTGTAATCTAGATGTAGAATTTGTTTCCCGAAGCTGAAAGGCACAA/  | 13971 | A_95_P266481 BP533801     |
| 14554 | 172 | 19 | 860  | AGAGTGAAACTGTTTCATCCAAATTATCGATCTGATCATGAAGACGATTTGACTTTGAC  | 13975 | A_95_P226939 FG145978     |
| 14555 | 172 | 20 | 1279 | CGTGTGATATTGGAAAGCAGTTCAACAAATTGCTATCCGCATAATTCTTATCAGTAGT   | 13977 | A_95_P030971 TA16020_4097 |
| 14559 | 172 | 24 | 788  | ATTAGCTAGATTGAAGCTTAATTGGAAACTGTCCAGAAGCGTTTGGCTCGTTGTGTTI   | 13984 | A_95_P288918 DV157727     |
| 14560 | 172 | 25 | 513  | CAGCAGTTTTGGAATTTACAAAGATGTGGCTGTAGATGAAATCGGCTGTATTTGATT/   | 13986 | A_95_P265001 AM827696     |
| 14561 | 172 | 26 | 517  | GGGGATATGTTGTGATTATCGTCGTGCTGGCTTGTATCACCATTATTTCTACATTTAT/  | 13988 | A_95_P001686 EH620909     |
| 14567 | 172 | 32 | 337  | TACTTAAGGGAACCTGGAAAGAAGCAACAATGTTACATGGTCTGATTCTTCTAATCT    | 13999 | A_95_P069940 BP192480     |
| 14571 | 172 | 36 | 797  | TCACATTTGTGGATTCTTGACTGGATTCTCCTTGCTTTGTCTGCTTACGCCCTCACA/   | 14007 | A_95_P308828 FG169612     |
| 14576 | 172 | 41 | 624  | GCGGTGAATGTTTTAACGCATACTGCTGATGTAACCTATTGATAAGTGGCAGCTTTCA/  | 14016 | A_95_P138842 EB442568     |
| 14578 | 172 | 43 | 1227 | TAAGTAGATCATCATGGATAACCAAGAACGGAGGACCAGATGTGGGGGAAATTCCT(    | 14020 | A_95_P203722 TA17915_4097 |
| 14584 | 172 | 49 | 741  | TAATTGCTAATTGGATGATCAATATGTGCGGTGATTTGGAATGCGATGAGTTATTTA(   | 14032 | A_95_P115682 DV157996     |
| 14586 | 172 | 51 | 759  | GCCGTTGTATCATAGGTTGTGCCGTCATGAATATGGATTTGAGTTTTCTGGTGTTAT    | 14036 | A_95_P181182 TA12919_4097 |
| 14587 | 172 | 52 | 809  | ATTTGAGAAGTGTTGCGGAAGAATTTGCTCGCAAGACGAGAGTATGACTCTATGCTC    | 14038 | A_95_P263721 FG164682     |
| 14588 | 172 | 53 | 427  | ACACCACTTCTAAATTACATTGGTTAAAGACCTTTAATTCTGCTGTTGCTTACCCTTTC( | 14040 | A_95_P110812 CV019923     |
| 14591 | 172 | 56 | 580  | CTTGGAGGCTCAACAGGAATTAGGATCATCAAACCTGTAGAATTTGCTATATGTATA/   | 14046 | A_95_P122282 DW002302     |
| 14601 | 172 | 66 | 651  | GCTTAATGCATCGGGCTGATCTTCTTGAGCCCTTTCTTTAGTTCTTTCATGAACAAG    | 14066 | A_95_P105122 FG147325     |
| 14602 | 172 | 67 | 271  | CAGTTCTATGTTGTGTTGCAGTATGACATTGAGTTGAATCTTAGTATGTTGTACTT(    | 14068 | A_95_P005821 EH617454     |
| 14609 | 172 | 74 | 233  | GATGCATTACTCACTGGTACCTTACAAATGATGGTATAGAGTTCCATCAAGGACTTAC   | 14082 | A_95_P112717 CV020796     |
| 14610 | 172 | 75 | 1022 | GATAGTAGTTCTGAAGATGATGGTGTAAAACGAGGTTCTGAAGGGAAGCACAAAAG     | 14084 | A_95_P207922 EF051139     |
| 14613 | 172 | 78 | 628  | GTGGATCTGTATTCGTGTTACAGTTCCATTCTGACTTTATTTGGATAATAGATTGCAI   | 14090 | A_95_P001341 EB678288     |
| 14614 | 172 | 79 | 261  | GAAAGTTGAACCCAGTCTTCTCGGTCCCTTGAGGTTGCTTGTCTTTTTGTATTGTAC    | 14092 | A_95_P154487 EG649607     |

|       |     |    |      |             |       |              |              |
|-------|-----|----|------|-------------|-------|--------------|--------------|
| 14616 | 172 | 81 | 855  | CATGTA      | 14096 | A_95_P255134 | FG155952     |
| 14621 | 173 | 1  | 446  | TAAATTA     | 14105 | A_95_P284883 | BP133207     |
| 14622 | 173 | 2  | 873  | GTAGCCTT    | 14107 | A_95_P228349 | EB447626     |
| 14623 | 173 | 3  | 1630 | CATCTGTATGA | 14109 | A_95_P119082 | TA18893_4097 |
| 14624 | 173 | 4  | 362  | GTGTCCATGA  | 14111 | A_95_P264341 | AM783661     |
| 14628 | 173 | 8  | 495  | GCACCAGGCT  | 14119 | A_95_P114757 | CV021742     |
| 14633 | 173 | 13 | 731  | TGGATCGTATG | 14128 | A_95_P135402 | EB438808     |
| 14637 | 173 | 17 | 0    | CGATTTTGTAA | 14136 | A_95_P018966 | A_95_P018966 |
| 14639 | 173 | 19 | 445  | TGTTCCGAGTT | 14140 | A_95_P095768 | BP533331     |
| 14641 | 173 | 21 | 784  | TGTGAGCACCT | 14144 | A_95_P009891 | TA11947_4097 |
| 14647 | 173 | 27 | 204  | GGTGAACCTT  | 14156 | A_95_P140617 | EB444512     |
| 14655 | 173 | 35 | 613  | GGCTTCTCCA  | 14172 | A_95_P152887 | EB683228     |
| 14662 | 173 | 42 | 403  | TGGTGTTACAG | 14186 | A_95_P067970 | DV160708     |
| 14665 | 173 | 45 | 2591 | GATTCAGCCCT | 14192 | A_95_P021496 | TC59934      |
| 14666 | 173 | 46 | 802  | TTGCAAACTGT | 14194 | A_95_P016716 | EB428777     |
| 14671 | 173 | 51 | 968  | TTCTAGTTGTG | 14203 | A_95_P199048 | TA16908_4097 |
| 14674 | 173 | 54 | 16   | GTGCCAATTAG | 14209 | A_95_P242212 | AJ719169     |
| 14678 | 173 | 58 | 869  | GTA         | 14217 | A_95_P009276 | EB451572     |
| 14682 | 173 | 62 | 383  | CGGATTGCAT  | 14225 | A_95_P093728 | BP532387     |
| 14683 | 173 | 63 | 994  | CCCCTGAATTT | 14227 | A_95_P187397 | TA14337_4097 |
| 14684 | 173 | 64 | 395  | AATATATTGCT | 14229 | A_95_P042386 | BP130345     |
| 14686 | 173 | 66 | 805  | CGGAAGTGTA  | 14233 | A_95_P184527 | TA13715_4097 |
| 14687 | 173 | 67 | 673  | CTGCAGCACT  | 14235 | A_95_P261216 | FG182506     |
| 14688 | 173 | 68 | 826  | GATTAGTAAG  | 14237 | A_95_P284918 | FG144419     |
| 14690 | 173 | 70 | 1557 | TGTAGTGCATA | 14241 | A_95_P188842 | TA14659_4097 |
| 14691 | 173 | 71 | 818  | CCATACTCAA  | 14243 | A_95_P123542 | TA13459_4097 |
| 14695 | 173 | 75 | 463  | GCTGGCTCCT  | 14251 | A_95_P178842 | TA12357_4097 |
| 14697 | 173 | 77 | 738  | GGAATGTTTT  | 14255 | A_95_P210832 | TA19480_4097 |
| 14701 | 173 | 81 | 412  | AAGTGCAACT  | 14263 | A_95_P033689 | AJ632906     |
| 14709 | 174 | 4  | 514  | TTAGAGGCTC  | 14112 | A_95_P224232 | EB643437     |
| 14713 | 174 | 8  | 688  | TGAAAGCCTT  | 14120 | A_95_P296518 | EB677507     |
| 14716 | 174 | 11 | 599  | TTATTTGGT   | 14125 | A_95_P218637 | TA21220_4097 |
| 14718 | 174 | 13 | 107  | GAGGTTTTGT  | 14129 | A_95_P032976 | AF211717     |
| 14719 | 174 | 14 | 702  | CACATGTGG   | 14131 | A_95_P304678 | FG190124     |

|       |     |    |      |                                                             |       |              |              |
|-------|-----|----|------|-------------------------------------------------------------|-------|--------------|--------------|
| 14720 | 174 | 15 | 513  | AATGGAGATTTTATTATGATGTGACCGAACCCACAGGGTTGCCTACGTATCCCCTCTT  | 14133 | A_95_P281098 | AM835641     |
| 14722 | 174 | 17 | 682  | CTAGTTATATAGCCTGTGTTTGTATGCTTTCATATCCAGAACATTGTCAGCGATTCA   | 14137 | A_95_P146292 | EB450285     |
| 14723 | 174 | 18 | 273  | GTTTTGTGAGGTTCCCTCCACAGACCTCAAGTATCCCTTTTAGTAATATTTTAAAATTT | 14139 | A_95_P105262 | CV017381     |
| 14724 | 174 | 19 | 1321 | GTTTGCTGTTTCTTATGTTCTCTGTTGTGAATAAAGATTCCGAATTCCTGTCCTAAA   | 14141 | A_95_P005841 | TA11844_4097 |
| 14726 | 174 | 21 | 456  | TAATGTTGTTCCAATCCTGCATCCACAGAAATGAACCATTTCAGGTCTATTTGACCTG  | 14145 | A_95_P264366 | AM845282     |
| 14727 | 174 | 22 | 716  | TCAAATTTCTCTCCAGCACTGCAAGTAATGCAACAACCTGTTGGTTCATCGTTCACA   | 14147 | A_95_P127487 | FG142863     |
| 14728 | 174 | 23 | 720  | GAATGGTGAGTTTCATTTTTACTGTACAGCAGAGGGTGCCTGCCCTTATTAAGGGCT   | 14149 | A_95_P159617 | EH618005     |
| 14730 | 174 | 25 | 587  | TGCTGTGATTGAAGAATTTGTGATTCAGATTATGATGAAATCCTGGATGTGCTATTTA  | 14153 | A_95_P015916 | EB683945     |
| 14731 | 174 | 26 | 823  | AAGTGCTATTGGACGTGACTGGCTTAGACTTTACGCCACTACACTATCTACCTTTGT   | 14155 | A_95_P117347 | DV160229     |
| 14732 | 174 | 27 | 794  | TGAAAACCTATGCACATGACATAGTATGGTGATGGTTGTTTCTCAATCTACGCGTACC  | 14157 | A_95_P229159 | FG167705     |
| 14734 | 174 | 29 | 760  | ATCATAAGATGGTGCAAAAGTTGAATGACAAATCCTTATGGCGCCTAGCTGTGCGTG   | 14161 | A_95_P248802 | EB451550     |
| 14737 | 174 | 32 | 369  | CTCTTGCTTGAATCTCTACGATAATGCATTGACAGTGTACTGTTTATGTTTAGACA    | 14167 | A_95_P209912 | EH623749     |
| 14739 | 174 | 34 | 656  | TATATCGAGTTCGTCCATTAATGTGCCTGAGTCGTCTGTGAACGTACTCTATATGTG   | 14171 | A_95_P266551 | FG637949     |
| 14740 | 174 | 35 | 1116 | GGAGGATATCAGCTGTGCTGTCTCTCAACCTTATGATCCATCCTGAGTTTTGGTAT    | 14173 | A_95_P191607 | TA15273_4097 |
| 14743 | 174 | 38 | 738  | TAAATATGAACATGGGAGGGATTTAGCCTCTGTTAACTGGTGATTGCCAGTTTG      | 14179 | A_95_P211597 | TA19650_4097 |
| 14744 | 174 | 39 | 279  | GGCTGTTAATTGATGTTTGTATTTCATGGACACAGCGTGGTCTAATGTTTGGTTTTCA  | 14181 | A_95_P134772 | EB437540     |
| 14746 | 174 | 41 | 580  | ATACATTGTAGAGATGAATGTCTTACACGAGAAGATCAATGCAGCAGATTATTTCC    | 14185 | A_95_P261296 | FG639994     |
| 14748 | 174 | 43 | 468  | GAGATGCAGATAAGTACTGTAAAATTTTGTATCAAGGCTGTCTCATGGACATGGAT    | 14189 | A_95_P125947 | EB451857     |
| 14750 | 174 | 45 | 635  | TTAGTGATCTCTCCCTCTTTTCCAACCTCTAAGTGATAGCAAATGTGGGATGTAGT    | 14193 | A_95_P305183 | FG637455     |
| 14757 | 174 | 52 | 1473 | TTCAGCGGGCGCTGAAAACATCGAAGAGTTGGGGAGAGTTTGTTCATATTTGATTAA   | 14206 | A_95_P249647 | U66402       |
| 14762 | 174 | 57 | 98   | CCCCCAATTAATAATGAGCATAATGTGATGATTACTCTTTTAAACGCTCTAAAGTAAA  | 14216 | A_95_P132322 | EB432787     |
| 14764 | 174 | 59 | 681  | ATATGGAAGTAGAGGGTAGTTACATGTTGTGGGATAATTTCACTATAGAGCTATTT    | 14220 | A_95_P145502 | EB449259     |
| 14765 | 174 | 60 | 395  | TCGTCTTACTATTGGGAAGTATAATTTCTTGGCAATAACGGGGCTGATGATATGCTTA  | 14222 | A_95_P184017 | TA13591_4097 |
| 14768 | 174 | 63 | 749  | TTGATGTTTGAACAGCTTCTTGTAAAATCTCGTGTACTTACCTTATATGCCACAGTGC  | 14228 | A_95_P000721 | EB678578     |
| 14780 | 174 | 75 | 957  | GTGCAGTTCTTGTATATTCTGATTCTATGTACTTTACACTTGTGTGGACAATGTGATA  | 14252 | A_95_P193842 | TA15758_4097 |
| 14781 | 174 | 76 | 705  | CCTCTCGTTTTAGTGCTAACCATATATGAATCACCTAAATAGGCAGTGGATTTGTAC   | 14254 | A_95_P215127 | TA20416_4097 |
| 14783 | 174 | 78 | 799  | ATTCCTTGTCTCTGTTTTTCTCAATCAATTAAGTGGTGAATGAGTTGGGATTGTTG    | 14258 | A_95_P133867 | EB440118     |
| 14785 | 174 | 80 | 1325 | TTTGGCCACAATGAACGAATTTGTGCTCGTCTTGTATCTTTAAGATGCAATCAATAG   | 14262 | A_95_P079015 | TA17519_4097 |
| 14792 | 175 | 2  | 352  | AAACTTGAGGGGAAGTGGGGTTTTATTTGGGATGTTTTTGGTTGAATATTGGAATTG   | 14275 | A_95_P003616 | EB434108     |
| 14795 | 175 | 5  | 857  | AATGTTTCCATGATCTGCCGAATACGGGCATGACATGGCATGGCGTTGCTGTTGTTT   | 14281 | A_95_P144192 | EB447351     |
| 14797 | 175 | 7  | 414  | TCAACAGCCTAATAATATGCTTTACTCTATGTCATATTTGCGCTTGGTTAGTGACATC  | 14285 | A_95_P001056 | FS425927     |
| 14798 | 175 | 8  | 742  | TAAAGTTTGAAGTTGACGTGAAGTTTTTGTGTCACACAAGTTGGGTTCTTGTGCCCC   | 14287 | A_95_P253424 | EH623247     |
| 14801 | 175 | 11 | 452  | GATTTGCAGATGCTCTGTCTTTCTAAAGTCATTGCTGAAGGTGTTGCTGTCGGATT    | 14293 | A_95_P123447 | DW003303     |
| 14802 | 175 | 12 | 773  | CTGCTAAAATGTAATCCATGTGATGTTGTCTACATAATCGATCCCGTGCATTTCTG    | 14295 | A_95_P244692 | DV159065     |



|       |     |    |      |                                                                |       |                           |
|-------|-----|----|------|----------------------------------------------------------------|-------|---------------------------|
| 14803 | 175 | 13 | 769  | CCTTTCCGATTGTGATGCCTTTGTTTTTATGCTCTGCCAGCTCCAATCTTCGTATCTAC    | 14297 | A_95_P014706 EB428320     |
| 14804 | 175 | 14 | 0    | TGGAACGATACAGAGAAGATTATGGTCTTTCGCGCAAGGATGGCACAAACAGTCAAG      | 14299 | A_95_P280988 A_95_P280988 |
| 14805 | 175 | 15 | 430  | GAGCAGGCCATGAAGAGAGATGTCAGGATGAAATACTTTCTGTAACTACTTTTTTG       | 14301 | A_95_P000096 EH619820     |
| 14807 | 175 | 17 | 258  | AAGTACTTAGTTGCCAGCTGTGTTGGGTCCCAACCGATAGCTCGGTCATAAAAAAG       | 14305 | A_95_P129902 EB429847     |
| 14810 | 175 | 20 | 823  | TCAGTAGACAAGGAGATCAGTTGGCCTGAGCTCAAGCCTTGATATATAAACGGCGC       | 14311 | A_95_P190297 DV160394     |
| 14818 | 175 | 28 | 700  | AGCTGAAGAATGTACAAATCCTCTATTTTCGTCTAATATTAATATGTGCCTTTGCGTTC    | 14326 | A_95_P029866 EB681703     |
| 14819 | 175 | 29 | 741  | CTCAGTTTAGCTGTGGATTTGCTGAGGGAGGAAAATGTTATGCTGAGAAAGAGTGT       | 14328 | A_95_P215057 TA20402_4097 |
| 14823 | 175 | 33 | 750  | GGCTTTAAAATGAATAGGTTAAGTACCCAACTTGATGATCATTTTAACCATGGTGG/      | 14336 | A_95_P130347 EB425306     |
| 14827 | 175 | 37 | 494  | TGTCTGTATAACTCAATTAGCCAATTGATGACTCTGTAATCTGTATTGAGAGCCCTGT     | 14344 | A_95_P308758 FG643555     |
| 14828 | 175 | 38 | 430  | GAGCAGGCCATGAAGAGAGATGTCAGGATGAAATACTTTCTGTAACTACTTTTTTG       | 14301 | A_95_P000096 EH619820     |
| 14829 | 175 | 39 | 864  | AGTTCCTGATAGTTTTGATGCTCTTATTCTGTTGATGACAAGGATTCTCATGGGGAG      | 14347 | A_95_P213822 EB678087     |
| 14830 | 175 | 40 | 848  | TTCTACTCCTCCCTCAGGGTGTGTTGCTATGATCAGCTTGTGTTTACGATCTTTGAGC     | 14349 | A_95_P253169 FG143546     |
| 14835 | 175 | 45 | 465  | ATGAAGCCAAGTATCGTATTTCAATGTCTTCATTACATCGGATGTAATTCGCTTGGAT     | 14359 | A_95_P215142 EH620700     |
| 14837 | 175 | 47 | 386  | ATACTCTCTGTATCAGTATTCTTGCCTGATGGTGACGCTAATAATTTGGTTTTAATCCT    | 14363 | A_95_P143177 EB446520     |
| 14840 | 175 | 50 | 81   | ATGGTCTAGGTGTTGTTGAGAAATGGACAGAATGTCCATTGATGAAGCAAGAAAAAA      | 14369 | A_95_P012831 CV019646     |
| 14842 | 175 | 52 | 198  | GATGATTTTGGTTGCAATTAGGGTTTCAATTTCTGTGCGTACTTGAATATTGTAAG       | 14373 | A_95_P161847 EH620431     |
| 14843 | 175 | 53 | 1049 | TTGTACCCTTTTATGTAAGTCTGCTACTCTTGTACTTGGTTTATTTTCAGTCAGCGCAAGCT | 14375 | A_95_P016471 AB044153     |
| 14847 | 175 | 57 | 1189 | GGTAATAGGTTGCTATTTGGTATGAATTGTTGCATCTGTATTATTTGTTGCCTACA       | 14383 | A_95_P194517 TA15913_4097 |
| 14852 | 175 | 62 | 211  | TTCTCAGGACCTGTTGCTACTCTGAAAGTATTTGAAGACAATGTTTTGGTCCGTGAGT     | 14392 | A_95_P157522 FG645304     |
| 14853 | 175 | 63 | 495  | CTCAGATGATGGAAGTCTAGTCAAGGTTGCAATCTCTTAATGAAATCCTCAGTTACAT     | 14394 | A_95_P071790 BP525792     |
| 14856 | 175 | 66 | 417  | CCAGCTCTTTCAAGTAGAAAATTTTTCGACATTGTCTTCTTCTGGGCAAAATTTTCCAAG   | 14400 | A_95_P143437 EB446733     |
| 14858 | 175 | 68 | 400  | CTATCTTCTGTCTCCCTCTGCTCATAACTTTGTCCAAGAATATGGATGCTATAATGAT     | 14404 | A_95_P073095 BP526127     |
| 14859 | 175 | 69 | 333  | TGAACCTCGTTACAGACTTATGGTTAGGAGGATAATGGAAGGAAATCGTCGAATGG       | 14406 | A_95_P078715 BP527584     |
| 14863 | 175 | 73 | 796  | ATGGTTGATGGAGGAGGTTAGATTCTGGGGAAAAATGGTTTTGGGTTCCTTTTTCC       | 14414 | A_95_P145567 EB449312     |
| 14864 | 175 | 74 | 255  | CTTGTCCTTTTAGCTAGCAAGTCTCAAGGCCATCGTTAATAGAAGCATCTAACATCC      | 14415 | A_95_P138547 EB442291     |
| 14867 | 175 | 77 | 845  | TTTCTAGCTGGTGTAGCCAAGTTTATTTATTAATACGCAATCTGGATAAGTTGTCTAG     | 14421 | A_95_P188602 TA14607_4097 |
| 14868 | 175 | 78 | 2072 | GATCAATAGGTGCGTGCTACCCAAACAAGATTAGTAGTTGAAATAGGTTTATTTCTGT     | 14423 | A_95_P196872 AJ002315     |
| 14869 | 175 | 79 | 580  | TAGAACCCTTAGTGTGTAATTTGACATGAATAAAACATTTATAGGGCACTCTCTAGA      | 14425 | A_95_P125452 DW005252     |
| 14871 | 175 | 81 | 914  | TTCATTGGCACTGGTATTAGTCCTCTGGGTTGTGTGGTCTAGAGTTGTGATTTGAATG     | 14429 | A_95_P119792 TA17553_4097 |
| 14875 | 175 | 85 | 1065 | GAGTCTGTTGCTGGAAGAGATTTGAACTCTTCAATTTACTTGTCCCTATTTAATATCAT    | 14437 | A_95_P203507 TA17867_4097 |
| 14877 | 176 | 2  | 704  | TTTTGGTGCATCCTCCGGTAGTGTGTAATTTTGTGACCTAATAAATGGCACTTGGTT      | 14276 | A_95_P001061 DW004427     |
| 14886 | 176 | 11 | 737  | GTGACATATGAGATAGGTTGATTGACCTGATAATGAAGTCAGCTTGGTCCAAAGAC       | 14294 | A_95_P204572 TA18094_4097 |
| 14887 | 176 | 12 | 784  | TGCTATGGATATCGCAAGAGGCATGACTTATCTTACAATGAGCCGAATATTATAATC      | 14296 | A_95_P118632 DV162248     |
| 14889 | 176 | 14 | 741  | CCCTTGATATCGATCCACTGTCAAAATCTACATGGTAGAAATAGTTTGTGAATAGGA/     | 14300 | A_95_P117487 DV160408     |

|       |     |    |      |                                                                |       |                           |
|-------|-----|----|------|----------------------------------------------------------------|-------|---------------------------|
| 14891 | 176 | 16 | 788  | CTTCTTCAGCCTTTTGCATGAGCTGATTTCCGACATATATTATCTTGTTCAAGTATCCT/   | 14304 | A_95_P218632 TA21219_4097 |
| 14894 | 176 | 19 | 660  | ATAGTTTTGAGCGAAGATTGCGTCTTGGCGGTCCACTGCTGAAGGAAAATATAGCAA      | 14310 | A_95_P151212 EB681450     |
| 14900 | 176 | 25 | 1439 | TTGCCATTCTTTGTATGACAATGCCTTCTGGATGAGACTAATGCATTGACATCTCTT      | 14322 | A_95_P210637 TA19438_4097 |
| 14902 | 176 | 27 | 354  | AAGCACTTTGTGTTGGTGCTGGTAGTGATTTACAATCATTTTTGTGTTGGTGTGGTAG     | 14325 | A_95_P131657 EB432021     |
| 14905 | 176 | 30 | 161  | GCACCGGGTTGTCCTTTTTATCTGATTATGTAATTTAGATGTAGGATTGCTATGTAG`     | 14331 | A_95_P213617 TA20086_4097 |
| 14906 | 176 | 31 | 641  | AACAAATAGTGCAGGCTATGGTTATCAGGCCACCAGTTGACAACTTACAGTGGTGC       | 14333 | A_95_P061110 BP135181     |
| 14918 | 176 | 43 | 792  | GAGCGGACCTGCATCTGATTCTAAAGTCAAAGAAACAGTTCAGCTAACTCTCATGG`      | 14356 | A_95_P138462 EB442219     |
| 14919 | 176 | 44 | 795  | CCACAAGTCCAAACACCTTAATGATGATTGAGAATTTCCATGATAGATAAAAACTATC     | 14358 | A_95_P128027 EB427581     |
| 14921 | 176 | 46 | 668  | AACGTTTTGCTAAAATGATTATGAACATGCATGATACTGCAACAATTGCTCTCCTCAT`    | 14362 | A_95_P016626 TA13924_4097 |
| 14924 | 176 | 49 | 533  | AGAAGAATGAGTCCGAAAGCAGTTCAATGTATCAAATCCTTTGATGTACGAAACT,       | 14368 | A_95_P260266 AM819928     |
| 14926 | 176 | 51 | 489  | CAGAAATAGTGAAAGGATCATTGAGCAGATGATCCAATCTAATGTGAAAGTGGGA1       | 14372 | A_95_P098478 BP534491     |
| 14930 | 176 | 55 | 420  | AACAACAATAGAAAAACATAAAAGACATAACACAGCCGGCACCTGCCACACACGGA(      | 14380 | A_95_P097488 BP534071     |
| 14931 | 176 | 56 | 364  | CCCTCATTACAGTGGATAGCCTTGGATCTAAAACATTTCTATAATGGATATGTTAT/      | 14382 | A_95_P024716 TA15752_4097 |
| 14934 | 176 | 59 | 658  | TCTTGTGAAAAGCCACAACCACTGGTTGTTCTTTGATGATGAGAACGCTGAGATCATI     | 14387 | A_95_P028151 EB451747     |
| 14938 | 176 | 63 | 862  | CTTATCTGGAGCCTGCCCATGTATTAATTTAACGATGAGAGTTGCAGTTTTCTATCC1     | 14395 | A_95_P195772 TA16190_4097 |
| 14940 | 176 | 65 | 711  | CAAGGAAAGATATTCAGAGGTAAGTGCATATGATCCTCTGGGATTTATTCTCTGGAT(     | 14399 | A_95_P157332 EH615384     |
| 14942 | 176 | 67 | 915  | CGGCTATTTTCTCATTATGGCATGCCAGTTATGAATCTACCAATCTCATCATCTACCG     | 14403 | A_95_P289988 DV161627     |
| 14947 | 176 | 72 | 662  | ACGCTCATTTTATGTGTACCCTTACACAAGCTATTGGTGTAGCTGATGGCGTTGGTGC     | 14413 | A_95_P139552 FG156212     |
| 14949 | 176 | 74 | 935  | GTAAAATCATGGATTATCATCAAGATTCATGATCCAAGTTATGTCTATCAGTGGCGTT     | 14416 | A_95_P009376 TC71430      |
| 14955 | 176 | 80 | 550  | GTAATTTTGTAAAGCGTATGTCATACCTTGAGATAATATACAGGGAATTATGTGTTT      | 14428 | A_95_P113312 CV021106     |
| 14956 | 176 | 81 | 535  | ACTTCATTATGGGGTTCTGCATCACCTGTGTGGATCGAAGGGTTTCATTACCAAGGAA(    | 14430 | A_95_P053771 BP133270     |
| 14957 | 176 | 82 | 783  | ATCCTAGGACTGGGTCCCCTGCAGCTTCTAAATCAGATGATTCAAAGAGGAGAACAT      | 14432 | A_95_P297178 EB681987     |
| 14958 | 176 | 83 | 461  | TAATTTTTGACTCTGTAAAATTAGTGGTTTCCAGTGATACCATATATTACACTCCCACA    | 14434 | A_95_P124242 DW004097     |
| 14961 | 177 | 1  | 667  | TGTTTTTCTAAAGGCTGCTGGATATCTCGATTGTGCGGTTGAAACGTTCTTCCCAG`      | 14439 | A_95_P137662 EB441388     |
| 14962 | 177 | 2  | 510  | GTAGTGGTGATGGGATTGTAAAGGATTTAGATGAACTCTTATCCGTTTATAAGCTC       | 14441 | A_95_P029396 TA17997_4097 |
| 14963 | 177 | 3  | 427  | CTTAAAGCGTTTGTGTTGATAAATTTGGATGCTCTAACTGGTTTGTAAATGCAGTTCT1    | 14443 | A_95_P094983 FG641634     |
| 14973 | 177 | 13 | 1515 | TAAATGCATCTTAAGTGATAAGTTCTGACAGATCCCCAACTGCTATACCAGTGGCAAC     | 14463 | A_95_P009966 TA14306_4097 |
| 14976 | 177 | 16 | 976  | GGTGTATTGTGGAATAGTGTTCAGTGAAATAAAAATAAACAAATATCACCTGGCTCG      | 14469 | A_95_P010166 TA14977_4097 |
| 14979 | 177 | 19 | 1700 | TAGAACTCATTTATCTTACCTGTTGTCCTTGGGCATTATTGCCAATGATCCATAGTTG     | 14475 | A_95_P257514 AB505625     |
| 14982 | 177 | 22 | 985  | CTGCAATTCATCTCTGAAGGAAGGTTATACTGGTACTTGAATTTCTCTGTAACTATTTI    | 14480 | A_95_P215782 TA20563_4097 |
| 14984 | 177 | 24 | 1800 | AGAGAGCTCTTGATGCCTCGTGACAGGCCAAATATGAGAATAAAAATTAGCTCTATTA`    | 14484 | A_95_P164587 AB505625     |
| 14988 | 177 | 28 | 627  | AGAAGTCTGAGTATATATATGATGCAGAACTTGAACTTTCAATGAAGGACTTGAGT(      | 14492 | A_95_P117622 DV160550     |
| 14989 | 177 | 29 | 777  | GGGTGTAGCTGCAGTTTTCAGTAATTTGGTTTTCATTACAGTTTTCATATTTGGAATCATT/ | 14494 | A_95_P253984 FG142249     |
| 14990 | 177 | 30 | 559  | GATATTACGGATCTCCAAATATGTGCTTTTATTGAACTGGAAGTGGTAACAAAGTGT(     | 14496 | A_95_P153462 EB683726     |

|       |     |    |      |                                                              |       |              |              |
|-------|-----|----|------|--------------------------------------------------------------|-------|--------------|--------------|
| 14992 | 177 | 32 | 566  | GTAATGGAGCGATGCACTTTCCATCGGGTTCCTTAATATCCTTGTAAGAAATAACT     | 14499 | A_95_P273726 | EH619367     |
| 14994 | 177 | 34 | 550  | TAGATCGCTGTATTATTGGTAAACCGTTCCTCCTCCGCTTCCACCTGTTCCCAATAAA   | 14502 | A_95_P142067 | EB445622     |
| 14995 | 177 | 35 | 287  | GTTTTCCATCACCACCAAATAGTGGTGCCACAATTGGCACCTTGACTTTTTCTCCATT   | 14504 | A_95_P125772 | EB424846     |
| 14998 | 177 | 38 | 1429 | ACCGGCACAACCATTATATCTTCCACTCATTCTTATGATTTGTATCTTGTGTGTTGTA   | 14510 | A_95_P031266 | TA16601_4097 |
| 15000 | 177 | 40 | 879  | GTTGTGTAGCCATTATTAACAAGTCACACTTGCAGCATTCTAATTGTATGAACTATAA   | 14514 | A_95_P007736 | DV999303     |
| 15003 | 177 | 43 | 2360 | TGGAGAAACCAAGGACTATGTAATCTCCCCGTCTTATTAATGCATTACTTTTTGTTA    | 14520 | A_95_P010116 | AB110952     |
| 15014 | 177 | 54 | 1077 | TGCAGTTTGTGATTAATATGAGTTATTCTCGGGGTAAAGGCTAACCTCAGCCGTGTC    | 14542 | A_95_P291108 | TA15454_4097 |
| 15026 | 177 | 66 | 770  | AAGAATGCTGTATTTGGTGATAGCAGTGCTTTGGCACCTGGAGGTGTTGTTGTTGGT    | 14566 | A_95_P146602 | EB450673     |
| 15028 | 177 | 68 | 521  | CCCCTTTGTCAAATGGTTCCCTCTTGAACCTGTCTGTGTTACTTTTGACAAGATAAGT   | 14570 | A_95_P050676 | BP132455     |
| 15033 | 177 | 73 | 703  | TTGTATACTTAATGACCCAGACTCTCTGAGTAGCCTAGAGCTATATTGGCAATCTTT    | 14579 | A_95_P124642 | DW004426     |
| 15041 | 177 | 81 | 858  | GAGATTCCGCTGCCAGAAGTTCTGTTCAACATCATGATCGAATGAAGCTGCTGATTI    | 14594 | A_95_P259311 | FG158261     |
| 15043 | 177 | 83 | 524  | GCCCGACGTCTCCTCTATCTTATATTTTCAATTTGTTATCTCATATATTCGAGACAAACA | 14598 | A_95_P153587 | EB683821     |
| 15046 | 178 | 1  | 236  | AGCCAGCTACTGTTTGCTAAAAGATGAGGTGACCAAAGAGTGTTAAACCAACTTCA     | 14440 | A_95_P210697 | TA19451_4097 |
| 15051 | 178 | 6  | 681  | ATATTGGAGGCATGTAACACTTTGTAGCTTGAACCAGATGAGCTGCTTTCCAGTTTTT   | 14450 | A_95_P115722 | DV158039     |
| 15057 | 178 | 12 | 161  | CGGTGTTTTAGCAAGAATGAAGGGGCGCTTAATGTTTGCTTCGAAGGAGCTGATGT     | 14462 | A_95_P258921 | X06134       |
| 15061 | 178 | 16 | 1022 | TCCATAAAATGTAACACTCGTAAGCTGTGATGAGTTAACAGTTTTGATTTGACATGTC   | 14470 | A_95_P013236 | TA14283_4097 |
| 15062 | 178 | 17 | 845  | TATCCTTGCTGCTACAGTTTTGGTTGTACTTTCCCATCTGTAATCTCTCACTATTTGTA  | 14472 | A_95_P015496 | DV158412     |
| 15064 | 178 | 19 | 228  | TGCTTTTGTAAATCAGTGTGAGACAGATCACCAAGGCCTTTTGTTGGTGGGCAATGTTI  | 14476 | A_95_P181665 | TA13036_4097 |
| 15066 | 178 | 21 | 390  | GCTCTGTCCATTAGCTTACATATGTTTCTCTGTTTTTGCATTGGATTTTGAGATTTACA  | 14479 | A_95_P089328 | BP530456     |
| 15069 | 178 | 24 | 771  | AGCTTCAATTTGACTACCAATATTTTTCTGTTGGTCTTTACTTGCAATGGGCAGTCT    | 14485 | A_95_P304668 | FG148050     |
| 15074 | 178 | 29 | 1029 | CACCTCTACTGGAAAGGTAATTGGTCTTTCTTGAGAATCTTGACAGTTGCACTGTGT    | 14495 | A_95_P196232 | TA16295_4097 |
| 15076 | 178 | 31 | 399  | AAGAGGCTACAAATCTTTGTTAATTGTGTTGTTTGCATTTGGCATGTTTTGAAGACTC   | 14498 | A_95_P282128 | AM784687     |
| 15078 | 178 | 33 | 512  | TCAGTCCCGTCTTTGTACAGTTGATTTCTATTAAGGTCTGTAGACAGTTATGTATAC    | 14501 | A_95_P106632 | CV017986     |
| 15080 | 178 | 35 | 679  | AGCGAAGAAAATGGAAATATTGAAATAGCTTCTCCAAGCACTGGAAGTCAGGCCCTI    | 14505 | A_95_P218232 | TA21126_4097 |
| 15087 | 178 | 42 | 478  | GTTTCATGAAGTAGACATGGATGCGTACAGAAAGCCAGCTAAGTACTTATTGTGAATT   | 14519 | A_95_P279153 | AM830119     |
| 15089 | 178 | 44 | 905  | TATGGGCAATACCAGAGAAAGCTAGTCCATCTTTGTATGGACTCCAACCTTTCTCTG    | 14523 | A_95_P296638 | EB678894     |
| 15094 | 178 | 49 | 664  | AGATTGAAAACTGTGTCCTGGACTTCGGTCTGACATTCAGGGAAACCAAGCACAGC     | 14533 | A_95_P066735 | BP136675     |
| 15096 | 178 | 51 | 535  | AGTAGTTGAAGTTGGAACCAAGAGAACAAGAGGCATGGATTTTTCTCGGCTCGGA      | 14537 | A_95_P307668 | FG644332     |
| 15097 | 178 | 52 | 578  | TCAGCTTTGTTGTTAAGCATAGTGATCTTTTTATGTGCGCCTGGTGGTCACTGCTAG    | 14539 | A_95_P155862 | TA14797_4097 |
| 15098 | 178 | 53 | 907  | TCGATAAAATTGACCATCTCAATCTCATTAAACCAGAACCTTCTTCCAAAGTTGGAAT   | 14541 | A_95_P239914 | X67159       |
| 15099 | 178 | 54 | 2231 | GATGCTTCAGTGAAGATATGGTTGTAACCTGTAACCAAACAAAAGAAATGAGACTTT    | 14543 | A_95_P033389 | AJ627182     |
| 15101 | 178 | 56 | 829  | CAGTCAAAGATAGATGCAGGCTTTGCAGTATATCCATTTTTGCCATAATTTTGGGACA   | 14547 | A_95_P229784 | DV159792     |
| 15104 | 178 | 59 | 618  | TATTCTAACAGAAGCCATTCCAAGGGGAAGGTAATACCTTTTATGCTGGTGTATTTGT   | 14553 | A_95_P048316 | BP131874     |
| 15107 | 178 | 62 | 443  | GTTTGAGGAGCTTTCTGGGATCTCAGGACATGGAAGTCGATAGTAAAGACCATGATC    | 14559 | A_95_P156592 | TA15919_4097 |

|       |     |    |     |                                                             |       |              |              |
|-------|-----|----|-----|-------------------------------------------------------------|-------|--------------|--------------|
| 15108 | 178 | 63 | 717 | TACTATTGCCCTTTTGTTCCTTTTGGAGCGTGTATTATTCATCGTAACGGGGAAAG    | 14561 | A_95_P157742 | EH615781     |
| 15111 | 178 | 66 | 240 | AACGCATTCACAAGTGAAAAGGAACCATGCTGTTTGTGTCAAATAAATCACTTAATT   | 14567 | A_95_P214477 | TA20271_4097 |
| 15113 | 178 | 68 | 827 | CTCCTACTCAATCAGCTAGCCTTTGAGTAAAGATCAGCAAGTGAGGTTATTCTTGCCT  | 14571 | A_95_P265171 | EB425594     |
| 15115 | 178 | 70 | 589 | CATGGTATTTCTCATCTGTTTGGATTAAGGGGATTGTTCACTCATTCTTGGAGA      | 14575 | A_95_P158132 | TA14284_4097 |
| 15117 | 178 | 72 | 448 | TTGGATCGCGCATTGAGTTGAGCGAAAAAACAATTTGCTTAATATTTAGTTTGGGTC   | 14578 | A_95_P125282 | DW005063     |
| 15120 | 178 | 75 | 708 | AAAGAGTTTATCAGCATTAGAAAAGCCTGCTGGTCTGCTTGAGGATGGCCTTATGTCC  | 14583 | A_95_P298073 | EH616346     |
| 15125 | 178 | 80 | 133 | TACTTCGGTGTATGTTTTTCGATTCTACCAAGTTATGAGACCTAATAATTATGACACC  | 14593 | A_95_P107882 | CV018573     |
| 15129 | 178 | 84 | 503 | TACGCGTATTGCCATAGCGTATTTTGTGAATTTGGAGATTGGCAACTTTATTATTG    | 14601 | A_95_P125222 | DW005018     |
| 15131 | 179 | 1  | 415 | TCATGTTTCATGCATGGAGGGGTTTTATCTGAAGTTATGAAATAGACATTTGCAGCGG  | 14604 | A_95_P270916 | AM824464     |
| 15135 | 179 | 5  | 860 | GTTTAACTCCATCGCCTTTGAGGATTGCGACTTGTAAAGCGTCTTAGTGGGACATTACT | 14612 | A_95_P118332 | DV161343     |
| 15140 | 179 | 10 | 432 | CATGTTTGTATAACTACGAATACTCCGAATTTTTCATTATCTAGCTTGTAGTCTAGCTC | 14620 | A_95_P133237 | EB434552     |
| 15144 | 179 | 14 | 827 | CTCTAATCCGTGTTATTTGTAAATCGTTGCTGGTCTGTGATCAGTTTGTCACTAGAGG  | 14628 | A_95_P217232 | EB679623     |
| 15146 | 179 | 16 | 496 | ATGAGTTATATGCTTGTGGTATTTTGCCTCCAGACTTTATGTATTACGAGTTTTTGG   | 14632 | A_95_P003476 | FG641760     |
| 15150 | 179 | 20 | 414 | GGACGGACTGAGGACTATTTCTCAAAGTAGAATATCCCTTCTGAAAATTTGTGTATA   | 14640 | A_95_P003241 | AJ272037     |
| 15154 | 179 | 24 | 548 | GATCACCTAGTACCAAGTCCATTTTCTTTTAGAATAGCACAAGCTTTCGTGTGTATA   | 14648 | A_95_P268796 | EB445968     |
| 15155 | 179 | 25 | 477 | GCATGGTTCTTCTCCTGTAAATCTTGCCTGGAATGTCCATACTCTCAACTGAAAG     | 14650 | A_95_P131717 | FG640545     |
| 15157 | 179 | 27 | 531 | ATTCCTTATCGGATCATAAAAACCCACTTTCCGAAGATCTTTTCTTCTCTCGGGATC   | 14653 | A_95_P279403 | AM803568     |
| 15158 | 179 | 28 | 630 | AAGCATTTGATAAGGCATTGAAAGGGGGTAAAGGGTTAGCTCTGGCTGACTCGTG     | 14655 | A_95_P045896 | BP131257     |
| 15162 | 179 | 32 | 771 | TAGTGAGCTGTCAGAAATATGTGGTGAGGGGGCTAGAATGGTTCGTGAATTGTTCC    | 14663 | A_95_P162957 | EH621945     |
| 15164 | 179 | 34 | 422 | GTCCCTTATGGGTGATTTTTTGTGTGTATAAGAAGAGCAAACGATTGTATAAAGCGA   | 14667 | A_95_P155642 | FG642661     |
| 15167 | 179 | 37 | 492 | TGCTAAAGAGAAGAAAACCACTGAAGACGGTGGCAAGAAGCAGTCGTCTTCTCCTA    | 14673 | A_95_P131762 | EB432151     |
| 15170 | 179 | 40 | 405 | AAGAGCTCTGGCGTCACATCCAATGAAAGCCAATAAGAAGGGTATTGGAGAGAACA    | 14679 | A_95_P102637 | CV016117     |
| 15171 | 179 | 41 | 184 | CGCGAAGATGATTGAGCTTTTCTTCTGTGCCCTTCTGGCTCTTCTCCATCACTTTTGT  | 14681 | A_95_P114937 | CV507090     |
| 15172 | 179 | 42 | 791 | TGCCAAGGCTGATAAGGCTTAAGATATTGAGTTTGTACTTTTTTCATTGTCGTATTCT  | 14683 | A_95_P145627 | DV162568     |
| 15173 | 179 | 43 | 711 | GCAGAATTCACAAGTACATTTACCAAGTTGATATTTATGACTGGTTCGAAGAAGTGT   | 14685 | A_95_P128567 | EB428254     |
| 15175 | 179 | 45 | 368 | CATATAGGACCATGGCATCATCTCAATTTGGTAGGGAGGTACATTAGTTTCTCAATA   | 14689 | A_95_P094183 | BP532593     |
| 15178 | 179 | 48 | 879 | ATGTATATGAGTACTGAAGCTTACATCTGATGATGGTGATCTAGCATATAGCTGGAT   | 14694 | A_95_P146062 | EB449921     |
| 15181 | 179 | 51 | 305 | TTTCAGCAGATCCAGAAACCTTTGCCAAGAACCGTGAACCTCAAGGTGATCCACTGCA  | 14700 | A_95_P106872 | CV018096     |
| 15193 | 179 | 63 | 486 | GTGCTTAATATGATCAACTCTAGCTAGTAACATTGTATGTCTTTTCTTCTTCTTTG    | 14724 | A_95_P109992 | TA12099_4097 |
| 15195 | 179 | 65 | 436 | TTAGTGATGGGTTTGTGATTGAAAAGTATGGTTATTTGATGTTTGTGCTGCCTCTTT   | 14728 | A_95_P195377 | TA16102_4097 |
| 15196 | 179 | 66 | 676 | CATACCTCCTGGTTCTTTGCTGGTCTTACCTTTCTGTACCTTTATTAATCTGGGCAAC  | 14730 | A_95_P047916 | BP131776     |
| 15200 | 179 | 70 | 3   | AGCACTGGAAGAATGCGGTGATGATCTGGATTCTGCCATCAAAGACTAAATGAGCT    | 14738 | A_95_P150337 | EB678788     |
| 15201 | 179 | 71 | 125 | TACATTGCTTTGACTTTCAAGATAGTAGGACGCCGAGCCCATTTAGCTGGAGAGTTT   | 14740 | A_95_P067480 | FG155271     |
| 15206 | 179 | 76 | 880 | CAAACAAGGCGAATGACTCCACCTCTATATTGGAGTATCTTGAGTTTGTGATAGTTTA  | 14750 | A_95_P059096 | TA16369_4097 |

|       |     |    |      |                                                              |       |                           |
|-------|-----|----|------|--------------------------------------------------------------|-------|---------------------------|
| 15208 | 179 | 78 | 207  | TACTGTTATGAAAAGCCGCTGATAGTTTGTCTACAGTTTTCTTTGCTTGATGATCTGT   | 14753 | A_95_P100208 BP535265     |
| 15215 | 179 | 85 | 361  | CAGAGCCAAAATGGGTAAGATATCTTAAATTGAATCTTCTGAGCCATTATGTTTCAGAC  | 14766 | A_95_P147937 FG182925     |
| 15216 | 180 | 1  | 129  | CTGATATGTTTGATCCGCGCCTACAAGCAAAGATACTTAACGTGGTTCGATGTGTCCTA  | 14605 | A_95_P141967 EB679730     |
| 15218 | 180 | 3  | 141  | CCAAGTGAGCGGAACTAAATTTTGACTTGAAACCTTAGTCACCTAGGGATTTGATTA/   | 14609 | A_95_P129777 TA17494_4097 |
| 15226 | 180 | 11 | 626  | ACCATTTATTTCCGGATTTATCCCTTGTTGAGCATTATATGTAATGGGCCTTCCCGCT   | 14623 | A_95_P060270 BP134955     |
| 15227 | 180 | 12 | 823  | GTAGCAGTAAGTTTCCCTGTTAAGTAGCAGTGAATTAAGTTTCCCTTGTTCTATCATA`  | 14625 | A_95_P177842 TA12087_4097 |
| 15232 | 180 | 17 | 848  | GGGGTTTAAGTGTGGTCAAAGGAGCTGGAACACACTTCTCACACCTCATACTTTCCTT   | 14635 | A_95_P240199 FG164541     |
| 15233 | 180 | 18 | 702  | GGTAATAATGCCTTTAACATTTCTAGCTTCCCTTTGTGAGACATCATATGGTTGTCTT   | 14637 | A_95_P028431 EB439386     |
| 15234 | 180 | 19 | 244  | TCACAGCAAGCATGGGAAGACTCATAAACTTCAGATTTGGGCATCAGCTGGACAAC     | 14639 | A_95_P104412 CV016999     |
| 15241 | 180 | 26 | 714  | TGACAAGTTGGCAATGTCAAATGATGCATACTCTAATAGTGTAGGATCAACAGCTTT/   | 14652 | A_95_P015316 DV158577     |
| 15243 | 180 | 28 | 545  | AGTCCCTAAACCTCCATTGTGATAAAAACATTTCTTTGTAGTGTACACTGTAACCTA    | 14656 | A_95_P001581 TA20683_4097 |
| 15248 | 180 | 33 | 796  | GTGTGTGTGTTTTGTGTGCGATTAGCACAAAAATATGATGTTGCTTCCAGGTTTTCTG`  | 14666 | A_95_P296718 EB679073     |
| 15249 | 180 | 34 | 743  | TGTAATAGAAATAGTGCAGTTCAATGCAAACATTCGAGTTTGGTTAATGAAATGGTC.   | 14668 | A_95_P199852 DW003387     |
| 15251 | 180 | 36 | 402  | GTGATAGCTTTAATTCCTCTTTAGTAGCAGTGGTTTGTGTAGAGCCTGATGTCTTTAA/  | 14672 | A_95_P064470 BP136063     |
| 15255 | 180 | 40 | 693  | CTGATGTTATTGCCTTTGATAGTTCTCAAAGAGTATATGTGTATAACAAGCACAGCTG   | 14680 | A_95_P026761 EB445608     |
| 15256 | 180 | 41 | 477  | GCGTAACGATAAAGTTGCTGCTATGTGATTAGAAGGTTACGAGTTCGAACTGTAGAA    | 14682 | A_95_P093408 BP532250     |
| 15257 | 180 | 42 | 99   | GAAAGTTTCAACAATTTAGTCTTTACTTGAATGTCAACCTCTAGATGATTTGTACAC/   | 14684 | A_95_P127997 EB427568     |
| 15260 | 180 | 45 | 625  | AGGTTCAACAAGCACTAGCAGCGGCAACAATAGTGAATCACAGCTTTATGGTAGTC     | 14690 | A_95_P139602 EB443405     |
| 15266 | 180 | 51 | 300  | GTGATCCTTATTTTTCTTGACATTGTTGAGAAGAGAAATAAGGTTCTGCAATGTTGTT/  | 14701 | A_95_P095043 BP532990     |
| 15267 | 180 | 52 | 708  | TGACAGTGAGCTTGTTGAATCCTTTAGTAGTGGGGATGATGATGATGATCTCTTGTA/   | 14703 | A_95_P148957 EB678562     |
| 15269 | 180 | 54 | 825  | AGCAACAACCTGACACTTTGCACTGATAGCAGTTCTGTGTAGCATTAGAGGGAGTCT.   | 14707 | A_95_P304738 FG162079     |
| 15270 | 180 | 55 | 2215 | GCTGCCATTAGGGGTTACCCTTTTCATTTCTGTTGTTACTGTTCTTTTGTGTTGCAATTC | 14709 | A_95_P015882 AF004232     |
| 15272 | 180 | 57 | 1150 | TTGTCCGAGTGTAGAGATTAGAGAATGCAAGTTAGGTTTTGACATGCTATATTCTCA/   | 14713 | A_95_P193592 AF289466     |
| 15273 | 180 | 58 | 356  | GACGAGATAGCAAGGATGATTAACAGCTGACATGGTTAATGCCATATGCTTTCTTCT/   | 14715 | A_95_P131582 EB435034     |
| 15276 | 180 | 61 | 592  | TTGTAGTGAAGAGGGGTTTGGAACTGATTATTATGCTTTGCTATTGTGTATTCACTC.   | 14721 | A_95_P124357 DW004209     |
| 15278 | 180 | 63 | 1140 | AAAGAATTGGTGCTTATTGGTTTGAATCCTACGTGCGGCTAGTTTGTGGCGATAGCTT   | 14725 | A_95_P033954 AY220479     |
| 15284 | 180 | 69 | 637  | TGATTTGGGTGCCAATGTCTACTTTTGCTTCTGTTCTAGCCTGTCTGAACTGTTTCGT/  | 14737 | A_95_P101083 TA12299_4097 |
| 15285 | 180 | 70 | 932  | CAGCTCTCGTGTGATTGATTTGATCTGCCATATGGCTTCTGTTGCTTAAGGATTTGAT/  | 14739 | A_95_P003386 M14419       |
| 15287 | 180 | 72 | 878  | TTTGTCTATGTTTATTGGACGCTGTTGAATTGACTGTGTATTAGACGGCTTTTATGT    | 14743 | A_95_P283478 Y08161       |
| 15288 | 180 | 73 | 834  | GTTCTGATATGATTCTGGTTATGTTTGACGATGAAGCTTTTATTAGAGTAACTTGGTG   | 14745 | A_95_P185892 TA14012_4097 |
| 15292 | 180 | 77 | 482  | GGAACAGCTTGAAGCATCGACACATCAGGGATTAGACCAACAACCTCCTTCTTCAA/    | 14752 | A_95_P132062 EB432485     |
| 15294 | 180 | 79 | 568  | CTGGGTACCTGCATGTCAAACGTATTATTCGCTCATGTTACGGTATTTTATTATTGTAT  | 14756 | A_95_P135017 TA18968_4097 |
| 15296 | 180 | 81 | 673  | ATCGAACTGTTCCAAATGTTTCTGGGAATCTTGCTCTGATTGTAACCATTTGTATCTA   | 14759 | A_95_P130972 EB431106     |
| 15301 | 181 | 1  | 917  | TATTACAGCTTGATCGGGATCTTTATGCTTGCTTAATTTGCGAATTTGACTATGGCCTC  | 14768 | A_95_P184967 TA13809_4097 |

|       |     |    |      |                                                             |       |                           |
|-------|-----|----|------|-------------------------------------------------------------|-------|---------------------------|
| 15303 | 181 | 3  | 526  | TGGACTGGATGTGCAAAACATTCCATTGGAGAAGACAATTCGTTGGCTTTTGA       | 14772 | A_95_P063745 BP135860     |
| 15306 | 181 | 6  | 346  | AGTATGCAGACATCTTAAACCTTTGCTTGTATCTCACTTTGGAAGGAATGTACATCA   | 14778 | A_95_P098348 BP534430     |
| 15309 | 181 | 9  | 916  | GTTACATCACTTTCTTAGAGTCTTTGTGCTGGTTGTCTATTTTATGTACTCACTGGC   | 14784 | A_95_P200192 TA17157_4097 |
| 15311 | 181 | 11 | 786  | ACGTGCGCTTTCCCAATTTTTACATCCTTCAAGAATGGCTTTGATCTCAAAATACTATG | 14788 | A_95_P146322 EB450324     |
| 15316 | 181 | 16 | 1174 | GGTGTATAGGTGGAAAACATCTTGAAATGCTTAAGGGACTTATGTAAATGATGTTCT   | 14797 | A_95_P202457 TA17640_4097 |
| 15324 | 181 | 24 | 580  | ACAAGGTGAAAGTTTTAGGTCAACATTATATTTCAAGGATCTCATTCTGAGAATGTGTT | 14813 | A_95_P271711 EB444918     |
| 15329 | 181 | 29 | 959  | CTGACCAAGAATTTAGCTTTTATTTGCAACTGATCTTAGTCAGTTGTTTTGTGCACTCT | 14822 | A_95_P183037 TA13362_4097 |
| 15330 | 181 | 30 | 1156 | AACCTGAAAGTATAGATTCTATCTGGAATCTGAGAGGAATCCTGAACACCTCATGGC   | 14824 | A_95_P188202 TA14518_4097 |
| 15332 | 181 | 32 | 287  | AATCACAAACACTTGGAGGAGAATAAGCGTACGTTAAAGGACACTGAGCTTGACGA    | 14828 | A_95_P080930 BP528131     |
| 15339 | 181 | 39 | 738  | ATTCAACCTGTCAACCAAGCCCTTGGTCGCTTTCCAGCTTTGAAATACATTCCATGA   | 14842 | A_95_P145162 EB448723     |
| 15343 | 181 | 43 | 456  | AATCTGAGTCTTTGGTCAAAGCTAAAAGAAATTCGGGTTACTGATAATCAGGAGAC    | 14850 | A_95_P307228 FG637951     |
| 15345 | 181 | 45 | 637  | AAGCCTTGCCTAATTTGAATTACCTTCCCGTGTAACTGTTGCTAGACTCTGTTAAAG   | 14854 | A_95_P269101 DW004055     |
| 15352 | 181 | 52 | 1739 | CTGTCTATAGTATTTCCAGTTGCAGGGTGAATGTCTATACTTTACGAGTCATTTCTA   | 14868 | A_95_P026511 TA14068_4097 |
| 15361 | 181 | 61 | 569  | TGCAATTTATGAAACTTGAAGGACATATAGGAGTAAATGTTACAGAGATGGTGGT/    | 14885 | A_95_P088238 BP529993     |
| 15368 | 181 | 68 | 529  | CGATGAGAGGAAAGCTAGGTTGATCGAAAGACTCAATGCTTTGAATGCTGCTGGTG    | 14899 | A_95_P032221 BP131873     |
| 15369 | 181 | 69 | 470  | CCTTAAACTGAGCTTTTCCATGCAATCAGCATTAGGGTTTTAAACCCTAAACTGAACT  | 14901 | A_95_P263026 AM845812     |
| 15371 | 181 | 71 | 1243 | TTTCTACATGAGAAGGACATTCTGGTCAATTTCTTGATGACGAGAGGTTGCGCAAGC   | 14905 | A_95_P013501 TA18942_4097 |
| 15372 | 181 | 72 | 335  | ATTAAGTGTGTTAGCTGATTCATTTCCAGGTCAATAGTGTACACCTCCTTTTTCGCC   | 14907 | A_95_P005851 BP532771     |
| 15374 | 181 | 74 | 412  | ACTTGCTGAAGGTCTCTGTAGCAAAGATCCAACTTTACTTAGGCATTACCCCTACATT  | 14911 | A_95_P105147 CV017317     |
| 15377 | 181 | 77 | 126  | TATTCGTTTCAGGTATGTTCCATACTAAATCAGTGGTTGCTTGACGTTTATGAAATGA  | 14916 | A_95_P042011 BP130244     |
| 15379 | 181 | 79 | 585  | GAGCATTATGTCCTTTTGTGTAACCTTCTTAATTTGGATATTTGAAAACCTTGCTCGGC | 14920 | A_95_P300418 FG139817     |
| 15381 | 181 | 81 | 651  | GTTTCTCGGATCTTTGACTTTGTGAGTTGAAGGGAGACAGTAGAACCTCTTTGCCTT   | 14924 | A_95_P004541 FG133250     |
| 15388 | 182 | 3  | 721  | CCATTCATGTTGGGTTGCCAAGAAGACCGAGATCTTCAATATGTGAATATATTTATT   | 14773 | A_95_P183382 EH620397     |
| 15394 | 182 | 9  | 219  | TCGTAAAATGAAAGAGCATTGTTGGTGTGATCCATCAGCCATCCAAAATAATAGTGC/  | 14785 | A_95_P140627 EB444515     |
| 15400 | 182 | 15 | 117  | ACTCTGATTCTGGTCTTAAGAAGCTTGATGAGTACCTCCTGACCCGTAGTTACATCGT  | 14796 | A_95_P114367 CV021562     |
| 15401 | 182 | 16 | 776  | CTTAGCTGGTTCTGTGCTATGCCATCATTTCTCTTAAACTTTTGGTCACTTGCATCTCG | 14798 | A_95_P291783 FG640499     |
| 15402 | 182 | 17 | 359  | GATAAGCGTTGGTTTCGAGTTGTAATACTGCTATCTGTTTCTGCTTACATATTTGTTAT | 14800 | A_95_P179212 CV020529     |
| 15404 | 182 | 19 | 812  | TAGACCTTCACTGATGGCTGAAAGTTGGGAGTGTTCGTCTTAAAGTTATTTGTGTAA   | 14804 | A_95_P230079 EB431969     |
| 15405 | 182 | 20 | 837  | GAACTCTTCCATTGTGATTGTTTTTGTATGGTGGAGTTTAAAGGACTGAATTCTTTT   | 14806 | A_95_P206437 EB430245     |
| 15406 | 182 | 21 | 782  | GTGACTGTTAGTAGCTCTGGGTCTAGCAGAAGATTGGAATAATGCTGAGAAGTTG/    | 14808 | A_95_P265626 DV999652     |
| 15408 | 182 | 23 | 727  | GGGATTGAACTGATTGTGTTTTAGACCAAATGGAGGAGGAAAGAGGAGATAGTCG/    | 14812 | A_95_P128477 EB428179     |
| 15410 | 182 | 25 | 512  | ATTTGAGTTTCTTTCTGTTGACAATCATGGAATTTTGTGTTCTATTGCAAGGATGGG   | 14816 | A_95_P124942 DW004722     |
| 15420 | 182 | 35 | 286  | GGTCTCTGTGGAATGGTACTGAAGTTAAAATTAATAAAAATGAAAAGCAGATCTC     | 14835 | A_95_P001326 EH619214     |
| 15422 | 182 | 37 | 109  | CAGTCAAATATTTTCTAGTTTCCAAGCACATTTTCTATCAAATTCAGAACCCGTCTGT  | 14839 | A_95_P212062 TA19749_4097 |

|       |     |    |      |                                                             |       |                           |
|-------|-----|----|------|-------------------------------------------------------------|-------|---------------------------|
| 15424 | 182 | 39 | 228  | ATACAGCAATGCTGATTTCAATGCCTATGATTTGGCAATGGTGTACAAACAAAACA/   | 14843 | A_95_P008231 X68604       |
| 15425 | 182 | 40 | 356  | GAGCACCAGTAGAGTTAAATGTTTGCCTTTTTAGTCACAGATTGCTCCTTATA/      | 14845 | A_95_P055746 BP133784     |
| 15428 | 182 | 43 | 758  | GCATGTTTGAGTTGTTGAGTTACGACTTCTCTGTGAAACAGTTGTGTGAATAATTTT/  | 14851 | A_95_P190312 DV162434     |
| 15430 | 182 | 45 | 1667 | TCAAACGTGTTTGTGGCCATGAAATGACCCCTTTTTATGGCCATGGGTTGTGTGATG   | 14855 | A_95_P014771 TA14394_4097 |
| 15432 | 182 | 47 | 1645 | GTGTCATCATCAATGAATGCTAATCCATTTACTACTTTGATGAGTTAACCTGCTGAC/  | 14859 | A_95_P201422 TA17420_4097 |
| 15433 | 182 | 48 | 326  | ATTTGTAATTTTGGTGTTCGATCCAAGGATTGTTTCTTTGCTTTGCCCGATTGACTTG  | 14861 | A_95_P099338 BP534892     |
| 15437 | 182 | 52 | 573  | GCCCAGAGTCTTGGTTTGCATTATATGGACTTAAATAATCCAGGTGCTGTGTCTTTGT  | 14869 | A_95_P062610 BP135559     |
| 15439 | 182 | 54 | 1220 | CCTCCCTTCTCGATTTCTCTACTATGCCTATTAGTTGAGAGTGAATTTGGATCAATA   | 14872 | A_95_P194367 TA15876_4097 |
| 15441 | 182 | 56 | 788  | ACAAAACGGGCATCAGAGCTGTTAAGATTGCCAATGGAAGTCAAGGAGGACGATG     | 14876 | A_95_P010711 EB438558     |
| 15446 | 182 | 61 | 829  | CCTAAGATCTTCTCATTGATGACGTGAATATGCCAACACAGACCCATCAGTCATATT/  | 14886 | A_95_P189812 TA14868_4097 |
| 15447 | 182 | 62 | 0    | GTTGGAGCCATTTGCTTACGGTTGCACTTTTCATAGTTATTATGTTATAAGAAGTGAG  | 14888 | A_95_P253299 A_95_P253299 |
| 15448 | 182 | 63 | 755  | TTGTGTGAGTATAGGTTCTTATTTTTGATACTGTGATTGATTTGGAGTCTGACCCC/   | 14890 | A_95_P199007 TA16900_4097 |
| 15449 | 182 | 64 | 824  | ATGAATTAGCATAGTCAGGTCTAGTTTCCGGATCAAATTTTGTGAGTGTTATCATTT/  | 14892 | A_95_P229604 DV157649     |
| 15452 | 182 | 67 | 806  | CTGGAATTAGGTTGTTTTTAAATTTGGTGACTCTGTAGTTTGCTTTTAAAGCCTAGGTT | 14898 | A_95_P016926 DV998783     |
| 15455 | 182 | 70 | 472  | AGCGGCATTTGCACTCTAGTGCCTCTTTTGTGTTGAGTGTTTCAGAACTCCATTAAT   | 14904 | A_95_P037338 FG626433     |
| 15458 | 182 | 73 | 552  | GTGAAAACGATAGGATTGTTTGGTACTACTAATTGGGGGGTGTATCCTTGTTTT      | 14910 | A_95_P028161 BP130458     |
| 15459 | 182 | 74 | 256  | CCTTCACAGGAATGAAATTCAGTAACACTCGTTCATAAAATAAAACAACATTGGAA(   | 14912 | A_95_P212147 TA19768_4097 |
| 15461 | 182 | 76 | 631  | CACAAACAGATTTTTCTTTTCAAGGGTACCTTTCAGATTTCACTATGGCAGAGACATA, | 14915 | A_95_P206707 EB444599     |
| 15462 | 182 | 77 | 478  | TTGTTGAAGGCTATGATGTGATTAAGGAAGGCTGAGGCTGATTGCGATCTGGATCTC   | 14917 | A_95_P063540 TA11676_4097 |
| 15464 | 182 | 79 | 765  | AGCATACACCGTCGTGTATTGACGAAAGAATAGATGCAATCTATATCTCTTAAAGTC   | 14921 | A_95_P183502 TA13472_4097 |
| 15466 | 182 | 81 | 455  | GACCTATTCAAGTTTACATGGCATGTGCAATGTTCTATTTTGTGCAATCACAGACTC/  | 14925 | A_95_P084350 BP528995     |
| 15470 | 182 | 85 | 861  | ATATTTTTCTAACTGGAAAACTGAATGTTCCACTGCTACATCATTGCGCCATTGCA/   | 14932 | A_95_P267361 DV159872     |
| 15475 | 183 | 5  | 555  | CTTGGTGTTACCGGAAGTTGTTGATTAATGACCAGTTAAATCCAATTTTTTCTAGTGT/ | 14941 | A_95_P203372 TA17840_4097 |
| 15478 | 183 | 8  | 393  | TCTCTGAACCTTTAGTAGGGGATATGGTCTCTGTATAACTGGTTTTGTCAAGAAATGT  | 14947 | A_95_P033994 AJ718012     |
| 15479 | 183 | 9  | 510  | GCTCTCCAGAATCTGAGGTATGTAATTGCTGTGTACTTTCAAAGCAAAATGTATGTC   | 14949 | A_95_P129607 FS388031     |
| 15480 | 183 | 10 | 557  | TATCATAAGAGAAGAAAGCTGGCAGGTTGGATCCTAGGGTAGATTCTGCTGTTGA/    | 14951 | A_95_P047406 BP131649     |
| 15482 | 183 | 12 | 803  | CATGGATGGAGCATTTCAACTTTTACATGCAAGATGTAAGTCAATTTTATGGATGTGT  | 14955 | A_95_P017286 EB678991     |
| 15484 | 183 | 14 | 3973 | GTGTTGATGAAAGGTGATGGTAAGGGTGAATGTTTTGCAGAATTCAGAAGAACG      | 14959 | A_95_P018821 TA13319_4097 |
| 15486 | 183 | 16 | 879  | CTAGGTGTAGAATTGACTAGTTCTTTTGTCTGAATAGTGGTCTGATATACTTGCTAAT, | 14963 | A_95_P023541 TA15369_4097 |
| 15487 | 183 | 17 | 535  | TCAGTACTGGGACTTTTGGGATTCAATATCATGTCTATAAGAATTGCCACAATAATAC, | 14965 | A_95_P018331 TA14339_4097 |
| 15490 | 183 | 20 | 957  | TCTGACTTGCTTTTGTAGCTATAGTTGTAAGCCCTCTTAAAAATATGGTCGTTTGC    | 14970 | A_95_P220967 TA21721_4097 |
| 15497 | 183 | 27 | 566  | CCATGGTTGGATCTTGCAATTGCTAAGTACAAATCTTATTGGTCTAGATATGTAATGT  | 14983 | A_95_P262826 FG635943     |
| 15499 | 183 | 29 | 767  | TCATGTATGCCTCGGCTTATTATCCATATGGTACGTTAACCGGTGTTAAAGCCTCCAT/ | 14987 | A_95_P201077 TA17347_4097 |
| 15500 | 183 | 30 | 453  | ATGCTGCTGGTGTCTTTATACATCAACCAAGCATAGTGACCCTTCTGATGATGTGAT/  | 14989 | A_95_P137027 FG146239     |

|       |     |    |      |                                     |       |              |              |
|-------|-----|----|------|-------------------------------------|-------|--------------|--------------|
| 15501 | 183 | 31 | 692  | TTCTAGTTATACTGTATTGATTCTTCATTTAGTGC | 14991 | A_95_P253124 | FG635430     |
| 15504 | 183 | 34 | 514  | GAGTCTTCTTGTTGATTTGACTCTCCATTGACAT  | 14996 | A_95_P003406 | TA12168_4097 |
| 15513 | 183 | 43 | 914  | TGAAGCTGATGGAAGTGCTAAATTAGGCGCTGT   | 15014 | A_95_P189412 | TA14783_4097 |
| 15516 | 183 | 46 | 360  | GGTTGTTATCCATGGCAGCTCAGGATTTTTGCT   | 15020 | A_95_P163117 | EH622105     |
| 15520 | 183 | 50 | 210  | TTACTGCATAGCTATTAGTTATGATGAGCAACC   | 15028 | A_95_P090953 | BP531151     |
| 15521 | 183 | 51 | 744  | GAAAAATAGCTCGACGCCAGGATGATAAAAAG    | 15030 | A_95_P030351 | TC74407      |
| 15523 | 183 | 53 | 976  | CCCTTAAACTGTAATCGTTACACATAATTTTCT   | 15034 | A_95_P002421 | AJ291738     |
| 15525 | 183 | 55 | 920  | GTAATGAGTCCGGAATCGTTCGATTATGTGGA    | 15038 | A_95_P220272 | TA21573_4097 |
| 15531 | 183 | 61 | 843  | GCCTATGTTGCATTGATTTGAACAGGAGCTG     | 15049 | A_95_P259501 | FG147028     |
| 15538 | 183 | 68 | 89   | GGACACAGTCACACAGGTATAACTGATGTA      | 15062 | A_95_P131202 | EB431330     |
| 15547 | 183 | 77 | 849  | GCATGGATCTCATGCTTGAGATGTAGCCATAT    | 15080 | A_95_P128492 | EB428190     |
| 15548 | 183 | 78 | 708  | TTTTCAGTCAATGTGCCTGGAAGTGTGAA       | 15082 | A_95_P221062 | TA21742_4097 |
| 15549 | 183 | 79 | 252  | GTGATAACAATATGTTGAACTATTGAACGC      | 15084 | A_95_P091203 | BP531251     |
| 15551 | 183 | 81 | 818  | ATTACAATTATGAGCTTCTATGGGATCATGG     | 15088 | A_95_P012151 | DV161682     |
| 15552 | 183 | 82 | 914  | TCTCAACAAAAGTCTGTTGAAATTGACCCTG     | 15090 | A_95_P222378 | AB091430     |
| 15553 | 183 | 83 | 488  | ATCTGAATGAAACCTCTTTGTTGTAATGTT      | 15092 | A_95_P080660 | BP528060     |
| 15557 | 184 | 2  | 633  | CTTTTCTGAAGAAAGCATATGGAGATAGCAT     | 14936 | A_95_P137162 | EB440885     |
| 15558 | 184 | 3  | 692  | TCACAAGTGTGCTTCATTTTTCGTCAGTC       | 14938 | A_95_P186217 | FG157511     |
| 15560 | 184 | 5  | 632  | TTTTCAAGGGTGCTCCTGGATGCTGCACT       | 14942 | A_95_P159372 | FG161814     |
| 15561 | 184 | 6  | 502  | GATCTCTTGATGTTTGATTAGTCTTAGCTT      | 14944 | A_95_P153247 | EB683528     |
| 15567 | 184 | 12 | 1165 | GTTGATTCTTGAGGAAAGTGATAATGGGGAT     | 14956 | A_95_P070630 | AJ299256     |
| 15568 | 184 | 13 | 466  | TTTTGGTTTACCATAACCACGTCCCATAGCG     | 14958 | A_95_P159237 | EH617190     |
| 15572 | 184 | 17 | 0    | TTGGGATATGACAGTTTGGCAGCTCTACTG      | 14966 | A_95_P310248 | A_95_P310248 |
| 15573 | 184 | 18 | 611  | TCCCTTTTCTGCTGGGAGGTGTCAAAGAACA     | 14967 | A_95_P220882 | EB677573     |
| 15574 | 184 | 19 | 443  | ATCAGCTTTATATATTATATGTATGGTGT       | 14969 | A_95_P160797 | TA12063_4097 |
| 15575 | 184 | 20 | 174  | GGGGATGTTACTGGAAATGTAGAAGATAGT      | 14971 | A_95_P013006 | EB444167     |
| 15576 | 184 | 21 | 1692 | GACTATTTGGAACATTGACCCGCCCTAAAT      | 14972 | A_95_P182677 | TA13276_4097 |
| 15578 | 184 | 23 | 469  | AATGTAGGGGTTTGGGGTAGGGAGAAGAAT      | 14976 | A_95_P050796 | BP132486     |
| 15579 | 184 | 24 | 746  | TCTGCTCAAGATTCAGGAAGGGATCATAGT      | 14978 | A_95_P187392 | EB678951     |
| 15583 | 184 | 28 | 579  | GTA AAAATGTA AATGCTAAGAAACATGTAG    | 14986 | A_95_P160612 | EH619290     |
| 15585 | 184 | 30 | 768  | GGCAAAGATGAAAAGAAACCAATGAAGGAT      | 14990 | A_95_P229424 | DV160405     |
| 15586 | 184 | 31 | 561  | AGGCTTTGCAGTGTATTTTGGTCCAGAAC       | 14992 | A_95_P017396 | EB678867     |
| 15587 | 184 | 32 | 171  | TTTACCATCATTCAGGGTGTCTCCCATGA       | 14993 | A_95_P104197 | EH621670     |
| 15588 | 184 | 33 | 457  | CCTGTACGTTAAGTTCAAGAAGAACCCTGT      | 14995 | A_95_P027116 | TA17677_4097 |



|       |     |    |      |                                                              |       |              |              |
|-------|-----|----|------|--------------------------------------------------------------|-------|--------------|--------------|
| 15594 | 184 | 39 | 630  | GATTAGTTTTTGGTGTACCTCAGACTCTGCTTTTTAGCTATAAATTTGTTGACAGC     | 15007 | A_95_P028391 | EH622574     |
| 15595 | 184 | 40 | 770  | ACTATGACTGGTCTGACCTTGACGATAATGGGAAGTTAAAGGATTTAACAGTGGTAC    | 15009 | A_95_P268276 | DW000395     |
| 15597 | 184 | 42 | 1038 | CGGTGGTTGATCTGAAACTCCCATGATTTGAACCTAGTTTCTATATAGAAATATTTT    | 15013 | A_95_P220357 | TA21590_4097 |
| 15598 | 184 | 43 | 834  | AGTCTACAGAAACTGGGGTGAACGCCGAGCTTATAGTTGATGAATTTGGTGAGAA      | 15015 | A_95_P151202 | EB681442     |
| 15599 | 184 | 44 | 597  | TGTACAACACCCTTTGAAGCATATTGTTGTTAATCCTTCTCCTTTGTTGTAACAATGGG  | 15017 | A_95_P293393 | FG640186     |
| 15601 | 184 | 46 | 516  | CCGTCTGTAATCTTGTAATCTGTGTATCCTCTTACATGTATAGCAGATTGGTGAA      | 15021 | A_95_P121682 | DW001791     |
| 15603 | 184 | 48 | 855  | TCTCGTGATCCCTCCTCATTTTCTGACTCGATATGAAAGCAATGATCTGGAGGTGT     | 15025 | A_95_P230134 | FG141642     |
| 15605 | 184 | 50 | 761  | GATTCATTAGATTAGTGACGCTGGTGTAACTGAGTGTATATCTGGAAATAGAGTA      | 15029 | A_95_P253769 | DV999561     |
| 15606 | 184 | 51 | 659  | GATACTTGATGATTGTATTGACTACCAGCAGTTTTGGTGAGTTTGAAGTGATCAACT    | 15031 | A_95_P266956 | DV157573     |
| 15610 | 184 | 55 | 709  | AGTTTTTACCTGCTCCGGCATTGCACTAGAAAGGATGTGTTCAATTATAATGGTTT     | 15039 | A_95_P195302 | TA16086_4097 |
| 15611 | 184 | 56 | 1225 | ATGAATGTAAGAGCAGATGCAGGATAAAGATGTGAGGAAGTAAACAACCTAAC        | 15041 | A_95_P185732 | TA13978_4097 |
| 15615 | 184 | 60 | 695  | CTTTTGACGTGATACAAGCACACCATGCATATCCTCTCTTTTGTGACCATAGTTCTT    | 15048 | A_95_P096718 | EB429106     |
| 15621 | 184 | 66 | 111  | GGATCAAGAAGTTGAATCTTATTGTTCCGACGAAATGCTCTAAATTACGGAATCTT     | 15059 | A_95_P133082 | EB434152     |
| 15625 | 184 | 70 | 703  | TTGAATAATGCACCTGTGAAGAATTAAGTCCATCCATGTACACTTGATATTGGTGAA    | 15067 | A_95_P304993 | FG637399     |
| 15626 | 184 | 71 | 524  | GCTAGGATAGAATAATATTGACGTATCTAGACCAAGGGATGTACCTTGATGAAATG     | 15069 | A_95_P066645 | BP136653     |
| 15630 | 184 | 75 | 1415 | CTGATGGACCTGGCTCTAGTGCTATATTCTTTACTTACAACATGTGGGTATAAAT      | 15077 | A_95_P208452 | TA18972_4097 |
| 15631 | 184 | 76 | 610  | GTTCTGCTAGTTGCAGGGTTTATGTTAGTATGTGAATACAATCAAGGGATGAATG      | 15079 | A_95_P159592 | EB678380     |
| 15632 | 184 | 77 | 765  | CAGTTGACGACAGTTGATTTTCTTCTGCTAGATTAAGTTTACCTTTACTCTTGTA      | 15081 | A_95_P120177 | DV999934     |
| 15633 | 184 | 78 | 669  | GTAGGGGTATGGTTTTTCAATTTATCGTTAGATCAAGTGTATCTGTTTCTACTTACC    | 15083 | A_95_P026026 | EH623982     |
| 15636 | 184 | 81 | 286  | CTCTTGCTGGACATATCGTAGACAAAATTTATTGCGTGAATAGTGGGCTACCGTG      | 15089 | A_95_P089928 | BP530726     |
| 15637 | 184 | 82 | 398  | ACCTCTATTCTGTTCTGTTGAGAAGTTATGTGCCATGTTGTGTACATTTTGTAGTGC    | 15091 | A_95_P057486 | BP134225     |
| 15639 | 184 | 84 | 689  | TCTGCCATACCTGAACTTTTCAAGTTTGGGTTTATGGAGCAAACATGTCTTCAAGCA    | 15095 | A_95_P017271 | EB683455     |
| 15640 | 184 | 85 | 414  | TCCCAGCCCACTTGAACAATTTGAAATAATCTCATTGATTCCTGACGAAATAGGAA     | 15097 | A_95_P057446 | BP134217     |
| 15641 | 185 | 1  | 224  | TTTTTCTTTGAACAATAGTCCCAATAGAATAGTTGACCTGTTCAAGTTCTGTTGCCCT   | 15098 | A_95_P099813 | BP535076     |
| 15642 | 185 | 2  | 849  | GAGTTCATTGGTTTTTATGAAATGCTGGTTGTTGAACCTCTTTTGGCAATATAAGCA    | 15100 | A_95_P223897 | EB677784     |
| 15644 | 185 | 4  | 226  | CTCTCTGAGGCACTAAATGTTGATCTATTTATGATTATGTTCTGTCGATTTTGCAGAA   | 15104 | A_95_P004456 | EH619941     |
| 15645 | 185 | 5  | 0    | TGAACATCAGCTGGAAATCAGCACTGAACTTCTCCTACCCATGGACACGATCTTCAA    | 15106 | A_95_P316883 | A_95_P316883 |
| 15646 | 185 | 6  | 381  | GATATACACTTCGATTGTAGCATAACTAAGATGTTTCTACTCTTTCAAAGTTCTTCCAG  | 15108 | A_95_P094973 | BP532960     |
| 15647 | 185 | 7  | 977  | AGTCCCAGCTTATGTAATACAATGCTTGTGTCATCATTATTCAATTACGTGTAGCTTC   | 15110 | A_95_P197912 | TA16666_4097 |
| 15648 | 185 | 8  | 811  | CTACAGTATCTTTTGGTTATTCTCACTGAACAATTTAACGATTGGCATGTCAATCAGT   | 15112 | A_95_P199947 | EB444224     |
| 15652 | 185 | 12 | 544  | CGCATATGGTCCATTGTAAGTCTCAGGTGTTACTTGACCTACTTAATAGTCATTTGAAGT | 15120 | A_95_P134007 | EB435774     |
| 15657 | 185 | 17 | 467  | TGATTACAGATCTTACTGGTTTGGCAATGTCCAATGCATCTTTACTAGATGAAGGGAC   | 15130 | A_95_P121002 | DW000972     |
| 15661 | 185 | 21 | 473  | AACTTTTCTGTTGCTCCAAAGCTCCCTTCTCACCCCTTAAATATGAGTTCAAGTAAAA   | 15138 | A_95_P158357 | EH616350     |
| 15665 | 185 | 25 | 889  | TTTTCTGTTGCTTCTGATTATTCAGGTTTATGTCCAGTACTTGAGTCAGTGTGCATT    | 15146 | A_95_P229759 | EB425050     |

|       |     |    |      |                                                               |       |                           |
|-------|-----|----|------|---------------------------------------------------------------|-------|---------------------------|
| 15666 | 185 | 26 | 431  | ATTATAACGACTGGTTAGGCCGTCTGTTTGTGAAAATGAGAATCATGGCTGATTGT      | 15148 | A_95_P090048 BP530780     |
| 15671 | 185 | 31 | 488  | TGATGTTTCTATGCCATACAATACCTGTATCCAGTAGCTCATAGAACATGTGACAAAG    | 15157 | A_95_P183572 TA13490_4097 |
| 15674 | 185 | 34 | 482  | TGGTTCACGGCAACCACTAACTTTTGGCGGAGACCTGTATTTTTATTAATAAATCCGTT/  | 15163 | A_95_P253399 TC53947      |
| 15678 | 185 | 38 | 4589 | AAATGCTGTTCCACCTCCTTTGGCATATGCACTGGGAAGGAACTTAAGGAAGCTGT      | 15170 | A_95_P032611 AY567977     |
| 15682 | 185 | 42 | 69   | GTCTTTAAGCTTGCACTTTGATTTTGTGGATGTGATTTTCTTTGTTGGGGAGA         | 15178 | A_95_P130222 EB430267     |
| 15683 | 185 | 43 | 311  | GAAAGCAATTCAGCATAACAACAAGATATTGAAGGATCTCAAAGAAAGACTTTTGCT     | 15180 | A_95_P107097 CV018206     |
| 15686 | 185 | 46 | 586  | TCCATTACAAGTATGGATAGGAAACGAACAGGAGGCCCCCTTTATTTCTTTTCAGGC     | 15186 | A_95_P167106 EH664113     |
| 15690 | 185 | 50 | 669  | GAGCAATAGCGACTTAGTAAGCAGAAGAGTTAACAACCTGCAAGAGATTTACATAA/     | 15194 | A_95_P116442 DV159154     |
| 15698 | 185 | 58 | 501  | GTCCTGTTTCTAATTGTGTTGGATATCCTTGAGCCTTAAAAGATAAAAAATGCACACC    | 15210 | A_95_P160887 EH619582     |
| 15703 | 185 | 63 | 0    | ATACCATTCAAGGCGAATCGAAGCTTGCCAGCTACTTGACTCCTAGAATTGACGATCT    | 15220 | A_95_P315588 A_95_P315588 |
| 15704 | 185 | 64 | 701  | CTTATTATGGAGCTTCAGCAGCAGTTCCAGTTGTGCTTGGAATCACATTTTATTCI      | 15222 | A_95_P202752 TA17702_4097 |
| 15705 | 185 | 65 | 848  | AGTAAACATGCATTCTGTGCTTTGTCAGACTGCCATAATCACAGCTTGCTACAGCAG     | 15224 | A_95_P268606 FG146677     |
| 15706 | 185 | 66 | 1679 | GATCAATGAGTAATACCAACCAACTTTTGCTTCTATGTTCAAAACTTGCTCTCTTCA/    | 15226 | A_95_P206042 TA18420_4097 |
| 15713 | 185 | 73 | 433  | AATTGCAGAGTCAAGCTGCTGAGCAGTCAAGCTCCTAATTTGAGCAAGGTTATATC/     | 15240 | A_95_P103462 DV158664     |
| 15721 | 185 | 81 | 151  | CTTTGTGGATCTGTATTTACGAAGTTATCTGGACCTTATCTGCACCTTAGATTTACACG   | 15255 | A_95_P104052 CV016820     |
| 15725 | 185 | 85 | 183  | TTACATGCTGGATCACTGTGATCGAAAATGTTGCCTTGGCATTGATAACAATCGGG      | 15263 | A_95_P108377 CV018809     |
| 15727 | 186 | 2  | 319  | TGAGTTGGCTCTCCAGTTCAGAATACAAAAGAAGTCCTTCAATTTGTGGATGTTATGAC   | 15101 | A_95_P088158 BP529976     |
| 15730 | 186 | 5  | 792  | TACTGCATCTGTAGAACATCTGCCATTGTTCTGCATCATCCACTGCAAGTGGTGCTTC/   | 15107 | A_95_P298278 FG169769     |
| 15734 | 186 | 9  | 832  | GAATTGTTGCGAAGGTTGCCAAAGGGAGGTTAAGGGAAGATATAGCACGTGGCTA       | 15115 | A_95_P245227 EB680165     |
| 15737 | 186 | 12 | 826  | AGCAGTGGCTATTGTTGGATGTTTCTGATATTGAGCTATACTAAAGATTGTTTTCTC     | 15121 | A_95_P187342 TA14325_4097 |
| 15741 | 186 | 16 | 775  | GTAAGTGTGGATTGAATATGACTATCTGTTGATGTTGCTGATGACCCTCTGCGAAG      | 15129 | A_95_P243947 DW004424     |
| 15743 | 186 | 18 | 921  | ACATGTGATTTCAAGTTATAAATCCGGATGTGACATTCCGTCATCAGCTGACTTAAC     | 15133 | A_95_P200977 TA17326_4097 |
| 15747 | 186 | 22 | 496  | CCAAGCGTCCCTGCCGTAGCTCATAAGTGATTTTTTAATTTCAATTTCTGTTGTAATCCAG | 15141 | A_95_P095413 BP533184     |
| 15758 | 186 | 33 | 213  | TGAGGAGCAACCCATTGATCTTCGGCATCAGTTTGGTGGGCTTTAGTTTATAATATA     | 15162 | A_95_P103937 CV016764     |
| 15763 | 186 | 38 | 814  | GGCGCTGTTAGTGGAAGAGTAGTTTACAAGAATGTAATTCATGCTCTTGCCAGTATA/    | 15171 | A_95_P011456 DV160992     |
| 15764 | 186 | 39 | 317  | AACAATTTCAAAGTGTAGCTTTCTATCTGTTCTTCTAACAACCACTAATCCGGATG      | 15173 | A_95_P108447 CV018833     |
| 15765 | 186 | 40 | 131  | GGATTTAGCTACATTTTGGTGAATTTGGAACCTTGATCTCGAAACCCTTTCTCAGGTT    | 15175 | A_95_P031161 EB445761     |
| 15766 | 186 | 41 | 538  | CATGTCCAATGCTTGAGAGCTATGTCAATGTTGATATTTCTGAAAACATGATTAG       | 15177 | A_95_P138852 EB442579     |
| 15768 | 186 | 43 | 840  | GGTGTATCACATGCCTGATGTGGTTATGCATGACAGTATCTTGTAATAATGTAATTCT    | 15181 | A_95_P254424 EB434745     |
| 15770 | 186 | 45 | 631  | GAAGCGTAGTCCGTGAAATGATGTTCTGGCTCAATTTTTGATAAAATATATTGTGTT     | 15185 | A_95_P219792 DW005127     |
| 15777 | 186 | 52 | 822  | TAGTTTGTGTTAGTTCAATTTGCTTTAACCTTTTTAGGCGGTTCTTTGCCTTCATGG/    | 15199 | A_95_P149177 EB678878     |
| 15781 | 186 | 56 | 623  | ACTCCTGGTCATACGCGAGGGCATATCAGTTTTACTTCCCAGGTCAAAGACAATTT      | 15207 | A_95_P159382 EB449939     |
| 15782 | 186 | 57 | 816  | ATATGGTATGGATTAAGTGGGTGCTGCCACCGCATCATCTATCTGCATACACGAAATC    | 15209 | A_95_P292303 FG169614     |
| 15784 | 186 | 59 | 834  | TAGGCTGGAATTCATAATCGGGATATTCTTCTTCAATGGTGTGCTGATTCTTCTGTT     | 15213 | A_95_P291883 EB425309     |

|       |     |    |      |                                                             |       |                           |
|-------|-----|----|------|-------------------------------------------------------------|-------|---------------------------|
| 15790 | 186 | 65 | 663  | CGCCTGACTTGAATGAAGATGGAGATGATCATACTCCTCTTTAAGTACTATGATATGA  | 15225 | A_95_P211847 FG639450     |
| 15791 | 186 | 66 | 582  | GAGGATGGGATTTGTATTGATTTAGGGTAGGGATTTAATAAGGTTTTAGGATCTGTA   | 15227 | A_95_P059161 BP134667     |
| 15793 | 186 | 68 | 711  | GCTTTTACGTGCTTGATGTAGTCATCAGATTTTCATGGTCTGCTCTTTTCTTTTCAACI | 15231 | A_95_P216177 DV157720     |
| 15796 | 186 | 71 | 431  | GCCCCGTCCACTGCCACAAAATGGAATCTAAAGATTTAGAATGATATATGTTTATCC   | 15237 | A_95_P100138 BP535234     |
| 15798 | 186 | 73 | 1330 | CCACAGTGAACGAAATTTGTGCTCGTCTTTGTATCTTTAAGATGCAGTCAATAGATTA  | 15241 | A_95_P201897 TA17519_4097 |
| 15804 | 186 | 79 | 186  | CTGTAAGCTTCGTGGCAGTATTAGCTTAATTATCTTGTAATAATTTCTACAGTTAGAI  | 15252 | A_95_P029596 TA18101_4097 |
| 15806 | 186 | 81 | 827  | CAAGTGTTTACACCAGTGTATTGGGAGCCACATAACCACAATTTTATCACTACGCTT   | 15256 | A_95_P310293 FG172952     |
| 15810 | 186 | 85 | 756  | CGAGAGGCTCTTAATTCTGGACTCTTTAACATTTTCAGAGACATGAACTTATCCTT/   | 15264 | A_95_P156627 EH614400     |
| 15812 | 187 | 2  | 606  | CTTAAACGAGATGAATTGGATAATTTGTAGCGGATAATGTCACAGAGCTATTTATTC   | 15267 | A_95_P244477 FG642298     |
| 15817 | 187 | 7  | 651  | GACAAGGAGAGTAATACAAGTGTATCATAGTTTACCTGTAAAGATTGAGGTTTCTTA   | 15277 | A_95_P122077 DW002134     |
| 15819 | 187 | 9  | 683  | TCCAGTGGATACTGAGAAAGTTGAGAAAGCAGCAACGGAGCTTGTTAAGCCTAATC    | 15281 | A_95_P288813 FG641302     |
| 15822 | 187 | 12 | 685  | TTGGAGAAGTATTTGAAGCAGTTAAGTCTGTTTTTGCCTCACTGTTGAGAAGGTTG    | 15287 | A_95_P157352 EB425244     |
| 15823 | 187 | 13 | 369  | TCTTTCTGAATTGTGGAATGCTCCTGCTATTTTATCACAAAGAGGATCGGTTTCAGC   | 15289 | A_95_P096148 BP533497     |
| 15825 | 187 | 15 | 239  | CATGTGTTATACAAGTGAATCAATTAATATTATCTTGACCATGGACTTGCTGTCACA   | 15293 | A_95_P129837 EB429793     |
| 15831 | 187 | 21 | 312  | ATTGGTTCATTCTCACGGTCCACTAGCAATCTGGTCCCCATATGCTTCGATTGTTTAC  | 15305 | A_95_P040271 BP129783     |
| 15834 | 187 | 24 | 776  | TGATTTGTTCAAGCCTGTAACAGCAGACCCATGATCATATCCCATCCGAGTTTCAGC   | 15311 | A_95_P261086 FG158633     |
| 15841 | 187 | 31 | 494  | GGAAGTTGTTTTCTTGGAGTACTGAATTATCTATCTTCTTCCAGTAGAACTAGTCTT   | 15325 | A_95_P021326 FG638771     |
| 15842 | 187 | 32 | 84   | AACAAGAGAAAACCATCAAACCTCTCCCTCTCCAAAATGGACGATTGAACCTTAGC    | 15327 | A_95_P090663 BP531050     |
| 15844 | 187 | 34 | 714  | GACATAGGGTACCAGAGAAATCTTTATTTGAATCAACTTCGTTTTTACTCTTGTTGTT  | 15331 | A_95_P001046 TA14635_4097 |
| 15850 | 187 | 40 | 212  | CTTGTTGCTAATTACTTCTCTGGAGGATTAAGGGTGATTTAGCATAATTATAACAGTC  | 15343 | A_95_P150477 EB680558     |
| 15851 | 187 | 41 | 786  | AAGTGGATACATCAGTAGAGATCTCAAGCAAATCATCAACTCCAATGAGGACTCAA    | 15345 | A_95_P115932 DV157934     |
| 15853 | 187 | 43 | 1608 | GATAATAGCTTCCTCCTAAGGCTGATATCCCTATGAGGCTGGCATGATGAAGGTG     | 15349 | A_95_P193147 AY772945     |
| 15856 | 187 | 46 | 861  | ATGTCGATCATAGATCCTACTGGTCGAGTGCTTTCTGCCTTTTCTACTTACCAACAAA  | 15355 | A_95_P214037 TA20175_4097 |
| 15861 | 187 | 51 | 1010 | CTGGTTCTGGTGCTTTGTTTCTAGTAAAGCATTTTCAGTTGATTTGTGAACTGGATTT/ | 15365 | A_95_P183472 AB071967     |
| 15863 | 187 | 53 | 435  | AGACTCTCAAGTTGTGTTAGTGGTTTGTTTAATTATGAAGCCTCCTGCCGTTGAGTC   | 15369 | A_95_P179162 FS416927     |
| 15866 | 187 | 56 | 389  | ATGAGAGAAGTGTATGAGAAAATACATGTGTATCTATTGATCTGGTGTAACACTT     | 15375 | A_95_P213787 TA20123_4097 |
| 15869 | 187 | 59 | 2409 | ATTTTCATGCTTGGTCCAGGGGTCTGAAAACAGGAATGTACTATCTAAGATCACGCG   | 15381 | A_95_P034194 Y10862       |
| 15870 | 187 | 60 | 538  | CACGCTATATGGAAGCTCATCTGTAATTTATCCATTTCTTTGATGTGAAGTGATTTA   | 15383 | A_95_P148352 TA13703_4097 |
| 15875 | 187 | 65 | 889  | CAAGATGAAAAAGAAGATGGAAGAGAGTGGGCAGTAACCTTTTCATTGAAAGCAAC    | 15393 | A_95_P009191 TA16947_4097 |
| 15879 | 187 | 69 | 711  | ATCTTGATGATTATATCCCATGGGCTAGCTAGTCGTGCTTTCTGATGAAGTGGTTCAA  | 15401 | A_95_P301483 FG200980     |
| 15883 | 187 | 73 | 62   | CCTCAAATAGCGACTGAATCTTGTTCAATACTTGAATGTATGATGTCAACATGTAAT   | 15409 | A_95_P134242 EB436358     |
| 15885 | 187 | 75 | 1155 | TTGCGCACGTCAGTGGAAAGATAACATTATGTGGTTTTATGATGAAGAGCTCAGAGT   | 15413 | A_95_P203227 TA17810_4097 |
| 15886 | 187 | 76 | 799  | TTTGATACGTTATTCGATTGTACCTGAGCTATTCCTATTTTCGGTTATGCATTAGCTTT | 15415 | A_95_P010411 TA11948_4097 |
| 15888 | 187 | 78 | 303  | GTGATAAGCAAGCCATGTTGTAACCTAAGCATCCTATATAAGTAGTGATACTTAGGA   | 15419 | A_95_P107647 CV018474     |

|       |     |    |      |                                                              |       |                           |
|-------|-----|----|------|--------------------------------------------------------------|-------|---------------------------|
| 15898 | 188 | 3  | 233  | TAGAGTTGAAAGAGTTTTTGTAAAGCCAACAAGAAGCATATGAGGTTAAATTAGGGC    | 15270 | A_95_P093458 BP532277     |
| 15900 | 188 | 5  | 893  | CAAGTGTAATTTTCCTTAGTGAGCAGCACATTCTTTATTTGTCTGTGTTTGACATGTTT  | 15274 | A_95_P230859 DV157578     |
| 15905 | 188 | 10 | 853  | GATGATGATTTTACTTGAAGCGGTTCCGGTTATGGAAGCCACGGAAGTACTAAACC     | 15284 | A_95_P206027 DW001171     |
| 15906 | 188 | 11 | 1641 | TGTGCTGATGAGCCTGAATGTTTACAAGACAACACTAGGTTAATTTACAGAAGTTTTAC  | 15286 | A_95_P183967 TA13580_4097 |
| 15910 | 188 | 15 | 849  | AACAGGCAATTGAGTGCATCACTGCAGCTGCATAAATCAACCAACCTCATTCTCCAAC   | 15294 | A_95_P022481 EB426400     |
| 15913 | 188 | 18 | 3239 | AACTTTTCCTGTTTGTGCTACTGTCCAGTAGTTGCAATCATCCTGTTTGTGTTTGGAA   | 15300 | A_95_P039516 AB041352     |
| 15915 | 188 | 20 | 1079 | TACTCAGTATCTGAGTTTTTGGATGTCATCCACCTGTTTGAATGTTTCAGAGATCGGGT  | 15304 | A_95_P205787 TA18365_4097 |
| 15919 | 188 | 24 | 509  | AAAGCTGACTAGCTGAGATTCAATCAGTTTCCCCTTATAAACGTGGAATGGTGCTCAC   | 15312 | A_95_P192582 TA15483_4097 |
| 15923 | 188 | 28 | 227  | GGACAAAAGGAAAGTGAGTGTGTGAAAATTAGTTAGTACTTATTTTGTCTACTATCTTC  | 15320 | A_95_P017456 EB434785     |
| 15931 | 188 | 36 | 863  | ACAGTTGCATGTATCATCAGCAGTTTCTTACTGTATTGTTTCAGTTGTGAAAGATAAAG  | 15336 | A_95_P298068 FG141610     |
| 15937 | 188 | 42 | 486  | GCGCGACTTGTAAGTATGACGTGCAAGAGTCAAATGACAAATGTGTTTATTGCTAA     | 15348 | A_95_P210862 TA19486_4097 |
| 15938 | 188 | 43 | 862  | TGGGCAGTTAATGCTCTGCTACTATATTAGTTGTTGGAATTTCTGGCACTTTGATTAG   | 15350 | A_95_P288953 DV999667     |
| 15939 | 188 | 44 | 760  | CGGATAGGCCTTAGTTCTTTCTTGGCCAGTATATGGAAATCATGTGTTTTTGCTAATT   | 15352 | A_95_P179952 TA12623_4097 |
| 15940 | 188 | 45 | 662  | TGCTGAAGGAACAAGAGAGCTTCTGTAAATTCACCAAGGACATTGACGAAAATTGTT    | 15354 | A_95_P293558 FG641828     |
| 15941 | 188 | 46 | 670  | AGGACAGACACAGGAGTCCACTTCACTTTCTTCGCACCTTCTTCTGTGAATATTTGTT   | 15356 | A_95_P314993 FG179505     |
| 15946 | 188 | 51 | 369  | ATTTGCTGCTAATGCACTTTTCGTGCTTTGCGGGCCCAATTAACCTCCAAAAGAAAAGG  | 15366 | A_95_P094153 BP532584     |
| 15948 | 188 | 53 | 915  | CCCATCTGATGTTCAATTTTCATGTGTCTGGACTAATGTAATCTTCTCAATAATGTGCTT | 15370 | A_95_P019456 TA14455_4097 |
| 15949 | 188 | 54 | 739  | TTTGGGACCGAGGCGTAACAGTTGTTGTGGCCTATGAATCAGCAGGTTAATAAAATT    | 15372 | A_95_P126382 DV999635     |
| 15953 | 188 | 58 | 700  | CCTTTAGACGACGAATAAGAATTTTTATGTGGATTTGGTTTTGTTGTGTACGTGGTTT   | 15380 | A_95_P011161 DV160976     |
| 15955 | 188 | 60 | 938  | TGTCGATGTTGATATTGAGAAAACAATGCAACGTGCTCTAAAGAGACATATATCTAC    | 15384 | A_95_P289903 DV161328     |
| 15956 | 188 | 61 | 765  | TAGCATGTGGGGATATAAACGCTTTTTCAGGAGAACATTATTAGAAACATCAGACTA    | 15386 | A_95_P137307 EB441033     |
| 15959 | 188 | 64 | 858  | TCTTCTGTGGGGTTTGATATATTCATTGCCAGAGTCGATTGTTGATGCTTGGCGCCTG   | 15392 | A_95_P231334 EB438510     |
| 15960 | 188 | 65 | 835  | GTGCTGATTGTTAAGAGTTTGTGTGCCATTTCTCCATCATTGTACAGATATTTCATGA   | 15394 | A_95_P181962 TA13104_4097 |
| 15964 | 188 | 69 | 805  | ATACCAAACCAAACCCATCATGAGGACAATCAAAAAGAGACGATGCTGAATCTCC      | 15402 | A_95_P120512 DW000472     |
| 15974 | 188 | 79 | 775  | TAGCACAACGAACGAAGCCACAGCCAATTCATTACGTAACAACCTTGGAAACAAGTCC   | 15422 | A_95_P289108 DV157571     |
| 15979 | 188 | 84 | 469  | TTACAAGTATCACTGGGCTAAGGCGGTTTCTATTATGTTGAGCTGGTCAGATGATCTA   | 15432 | A_95_P278698 AM819186     |
| 15980 | 188 | 85 | 869  | CGACAGAAATAAAGAGTTGAACTAGTCTGTATTATGGTTATTTAAGCACTGTAGCAT    | 15434 | A_95_P291128 DW002773     |
| 15984 | 189 | 4  | 689  | GGTTGGATTTTATGCCTATAGAAATGAGGCAGCCACCACCAGATATCCTGTACAGAA    | 15441 | A_95_P244312 FG193046     |
| 15986 | 189 | 6  | 944  | CTTCACAAACAAATGGCAATATGTGGTGATTTTGGCCGTGTGTTTGAATTTGGTCCCG   | 15445 | A_95_P007936 DV161215     |
| 15990 | 189 | 10 | 807  | ATTCTGGCTATATCTTTTCTGTGCTTTCTATGATGAATGAAATGTTTCCCTTGCCCTC   | 15453 | A_95_P177087 TA11873_4097 |
| 15991 | 189 | 11 | 294  | GCTTATAGTTTACCTAGAAACGACGATGACGATGATGATGATGAGTTACCTGGTGTA    | 15455 | A_95_P155718 EG650227     |
| 15993 | 189 | 13 | 631  | CATATCCAGTGTTTCATCATTGTAACCCATACTGGGAATTCCTCTTGATTATCATTAA   | 15459 | A_95_P118042 DV161054     |
| 16003 | 189 | 23 | 190  | ATGTGATTGCAAGATCAGTGGCTATGCAGACGCTGCTCAGCACCTGAAATATTCACA    | 15478 | A_95_P162862 EH617829     |
| 16004 | 189 | 24 | 771  | ATGGGTGCAGCACATGCAGAAAATGAACATTTTATTTATGATATAACCTCGAAGGTG    | 15480 | A_95_P150332 EB680417     |

|       |     |    |      |                                                             |       |                           |
|-------|-----|----|------|-------------------------------------------------------------|-------|---------------------------|
| 16007 | 189 | 27 | 750  | ATTGTTTTCTGGTTGAGCATTAAAGCCACTATAAAGAAACCTGACTATCTGCAGTTTT( | 15485 | A_95_P187427 TA14344_4097 |
| 16008 | 189 | 28 | 377  | CGATAGTTCGTGTGCTATGGATTCTTTGTATGATGTGGATCTCATCTGACACTGTA(   | 15487 | A_95_P082130 BP528439     |
| 16010 | 189 | 30 | 1462 | GTATGCTCCCTTTACACTAAAGGGAACATATCTGAACTTCAATTTTCTGGTAATATAA( | 15491 | A_95_P206957 TA18634_4097 |
| 16012 | 189 | 32 | 231  | ACATCTGAGTAGTGTTTTGCCCCTAATGGCACTGAATTGAGATTCTGATATCCGTTTT( | 15495 | A_95_P003306 TA13593_4097 |
| 16014 | 189 | 34 | 441  | TCAACCAAGTGTCTCAGCTGCTGACATTGAAAAACATGAGAAATGGTTTTCGGAATT   | 15499 | A_95_P067115 BP136776     |
| 16021 | 189 | 41 | 853  | GAGTTGACCTTACTGAATCAGCAACCCAAAAGTTTGAACAGTTTGATACTTCAGTGG/  | 15513 | A_95_P215027 EB444165     |
| 16023 | 189 | 43 | 293  | TAGCACTTGTCTCGCAAAGATTGATGCTTTGTTAACTGCTAATGACTGTATTATATTT( | 15517 | A_95_P130742 AM840689     |
| 16025 | 189 | 45 | 666  | ATTGTTGTGTTTGC GTT GAGGACGATTGCGGCTTATAAGTACCAATGGGTGGCAAAT | 15521 | A_95_P147627 EB452143     |
| 16026 | 189 | 46 | 695  | CAGATTTTCAGACTAGTTTCATGTTCTCTTTTGTCTGTAATTCATTTTGGGGATATGTG | 15523 | A_95_P157032 EH615086     |
| 16032 | 189 | 52 | 374  | ACCATTGACTGCTTGTCTTAGTTCCATGCTATCTCTCATCTATTAATAAGTTTCTTGG  | 15535 | A_95_P161482 EH620212     |
| 16034 | 189 | 54 | 474  | TATTGTCAATGCAATTTGCAGCCTGAAATTATGATGATGCTGACCAATTAGGTACTGC  | 15539 | A_95_P089833 BP530677     |
| 16036 | 189 | 56 | 105  | CGATATGACCTCTACCTTTGTTTTTGC CAAAAAAGGATTGTAGTTTTCAACGAGATG  | 15543 | A_95_P211927 TA19721_4097 |
| 16042 | 189 | 62 | 553  | CCAACCTAGCTGCTTCAATGTGGAGATACCATATCTTACATCGTGTACATTGTTTTAT  | 15555 | A_95_P195457 TA16120_4097 |
| 16045 | 189 | 65 | 463  | TTTTCTCCTTCTCGTCTAGGCCATTATCCCAGCAGAATGTGTAATGGGTTTATGTTCA  | 15561 | A_95_P038881 BP129391     |
| 16046 | 189 | 66 | 92   | GACCATAGTTGCTAAAGTTTTAATCAATTAATAATGGCACGTCGCGACTTCCCTTTCC( | 15563 | A_95_P133437 EB434931     |
| 16047 | 189 | 67 | 887  | ACTAGCTAGCGAGCATACTCGTATGTACACTATATAATATAATCTTGTCTGCTAGTCA  | 15565 | A_95_P198707 DW001909     |
| 16052 | 189 | 72 | 845  | CCGATTTGTAAGAACGATGTCTTTATTGGACTGCGTTACCTAATATGATCTTTACGT/  | 15575 | A_95_P014321 EB679064     |
| 16053 | 189 | 73 | 787  | CAGTGACGACAATGGATTTTTGAAAATGTTGCGTGTATTATTTGCTCTCAACTCTGA   | 15577 | A_95_P184197 EB442957     |
| 16054 | 189 | 74 | 475  | GATCTCATGATCAGTAGTACTTTAGACAATCTTTTTCCCACTTCAAAGGCATAATAG/  | 15579 | A_95_P159887 EH618420     |
| 16057 | 189 | 77 | 372  | GTCAGAGACTAGGAGTAGCATTTCACCTTGTTCCTCACATTCTGTAAAGCTTCTCTTA( | 15585 | A_95_P092948 BP532063     |
| 16058 | 189 | 78 | 466  | TGCTTCTATTTTTCTGTTAGCTGACTGAGAAGTTGTTTTCTTGCAGTTACTAAATCAT  | 15587 | A_95_P026796 FG638771     |
| 16061 | 189 | 81 | 429  | CTTTGGGTTTGTGGGATTTTTTCCCGAGATATTCTTGAGTCTATTGTACTCTAAAATT  | 15593 | A_95_P164172 TA12815_4097 |
| 16062 | 189 | 82 | 816  | AGATTTTTCCCGAAACTCTTGAAGCAGTCAAGATGGGGGTGGTGGTTTTGGGTGTTG   | 15595 | A_95_P160212 TA12680_4097 |
| 16063 | 189 | 83 | 718  | CTGCCTATTTTAGAAAAGAAGTGATGGAAATGTGGACTCATTTTCAGAACTAGCTCT(  | 15597 | A_95_P013921 TA14478_4097 |
| 16068 | 190 | 3  | 256  | TGCTCGACCCATTGAATTGGAAGTGCAATAGAAACGGAGATGAGAATTGTTTTGTTT   | 15440 | A_95_P006186 TA16599_4097 |
| 16071 | 190 | 6  | 909  | ATTGTCTACAGTTCAAGGGCGATGTGCTTGATTGACTTTGGGTTGCCAGTTGGTGAT(  | 15446 | A_95_P230579 DV161310     |
| 16073 | 190 | 8  | 1311 | GAACCAGGAACCTTGGCATTCTTTTGC GCTTATTGAATTGGTATAATGGAGCCTACC  | 15450 | A_95_P190907 TA15114_4097 |
| 16077 | 190 | 12 | 450  | TGCTTACTGAAGCATGTACTCTTGTATCTAGGCTTCTTGTGTGCTTCTTCTATTGG/   | 15458 | A_95_P061225 BP135207     |
| 16078 | 190 | 13 | 1515 | GACACTATAAGCAGAATTTTACTGCTTGACAATTGCAAGTGTGCTTACATGTTTTCAC  | 15460 | A_95_P012691 TC42677      |
| 16082 | 190 | 17 | 1679 | AGCTGAACCTTATTGCTCCCCTTGTCTCATCATCATGTTCTTCTTTTAAAGATG(     | 15467 | A_95_P239414 AY640382     |
| 16083 | 190 | 18 | 727  | TTGGAGATCCTCAATTTCTTCTTGTCCATAGACTAGCCACCACCACCAAAGATGG/    | 15469 | A_95_P241815 FG142490     |
| 16086 | 190 | 21 | 722  | TGTGTATGTTATAGTTTTGTGGTGCATGTCAGCAGTGTGCTGTCTGTAGATTCTCCAG  | 15475 | A_95_P202952 TA17751_4097 |
| 16089 | 190 | 24 | 464  | AAGAATTTTACAGATTTTGATATCTCTTCAAATCTAAGCCTGGTGCCATGCCGTGCTT  | 15481 | A_95_P055631 FG153655     |
| 16090 | 190 | 25 | 730  | ATGAAAAATTTGAAGATTTTTCCCGAAGCTCTTGAAGCAGTCAAGATGGGGGTGGTC   | 15483 | A_95_P148607 TA12679_4097 |

|       |     |    |      |                                                              |       |              |              |
|-------|-----|----|------|--------------------------------------------------------------|-------|--------------|--------------|
| 16092 | 190 | 27 | 226  | AAGAGTACTGAACTTCTGATCAGGAACTCCCATTCCAGAGGGCTTGTTCCGTGAAA`    | 15486 | A_95_P032306 | AB001555     |
| 16097 | 190 | 32 | 313  | GGGGCTGGGGCTTAGTTCGAGTTCCTTATTTTGTTCATCTTTTCTTGTTGTCACAA`    | 15496 | A_95_P076905 | BP527114     |
| 16098 | 190 | 33 | 750  | GATTATGTTCAATGTCTAAGAGATTCTGTAGGAGCTAGTGATGGCTAATGGTTAAT`    | 15498 | A_95_P013671 | DV158020     |
| 16099 | 190 | 34 | 386  | GGGGTAAACTGATTGTTTTTCAGGTTGTTGGTTGATCAATATTGTAATTGCCCTTG`    | 15500 | A_95_P093743 | FG153629     |
| 16100 | 190 | 35 | 914  | GTCTCTTCTACCATCCAATCGTTAAAGAAAGCATCCCCTACAAGTCTTAAAATCTCATT  | 15502 | A_95_P186497 | DV162062     |
| 16102 | 190 | 37 | 260  | AGTATGTTTTATCTCGTTGAAGCAACCTCCTTTTTCCCCCTTGACTAGTTGACTTGA`   | 15506 | A_95_P034169 | AJ718252     |
| 16103 | 190 | 38 | 862  | CCTCAGTGGTTCAAAGCCATACTTCTTTTTGAGTCCCTTTGTACAGTCGCAATCTTCC`  | 15508 | A_95_P136372 | EB440122     |
| 16120 | 190 | 55 | 295  | AATCTCAACAGGCTCATCTCTCAGTTATCTCATCGTTGACCGCATCTCTGCGATTTG`   | 15542 | A_95_P234679 | AJ718154     |
| 16122 | 190 | 57 | 189  | TCATAAACGTGTTGATGTACCAGACTTACATAGTTATCAGTGGTAACTCTTCATAGTT`  | 15546 | A_95_P132182 | EB432645     |
| 16126 | 190 | 61 | 595  | ATGTAGCCTTATCTCAGCCGCTTTTTAGAGCATATGATATACGTAATAAACTCTCA`    | 15554 | A_95_P143117 | EB446459     |
| 16142 | 190 | 77 | 750  | TCATCCTGTGTAGGGATTGGTGGGGATCCTTTCAATGGTACAACTTTGTTGATTGCT`   | 15586 | A_95_P146507 | EB450562     |
| 16146 | 190 | 81 | 214  | GCTGAAGAAATGGGAAATCTAGAAGTCAAGCTCTGTTATCTTTGTGACTTTTTCT`     | 15594 | A_95_P130262 | EB430299     |
| 16153 | 191 | 3  | 1199 | GGGGTCTTATTCATGGTTGATTTGCTTCTTAAGTTATCTTTGCTGGTGTATCATTTATA  | 15606 | A_95_P012466 | AF352797     |
| 16154 | 191 | 4  | 608  | CTGCACCTGGCTGCATCAATTTGTATGTTGGGATTATATTATAGTTTTGATTCTCCAA`  | 15608 | A_95_P222552 | EH615961     |
| 16155 | 191 | 5  | 0    | AGCCAATCCAAAATCAGATAACTTTGGGATGGTATCCCTCCCAAGCAGAATATTGA`    | 15610 | A_95_P269146 | A_95_P269146 |
| 16157 | 191 | 7  | 738  | GAAAATTCTGCTCCTGGTCACTTCTCGACAGTGATATAGTGTGGAGATGATCTGTGA`   | 15614 | A_95_P273958 | FG145625     |
| 16160 | 191 | 10 | 1589 | TCACATATCATGTGTGTGATAAATCCCAACGATAGTAAGCTGAATGTTTTAGGCTA`    | 15619 | A_95_P139842 | AM851012     |
| 16162 | 191 | 12 | 919  | CCTGTAGATTTATATATATGAGGCTATAATGCAATGCAAGGGTTGGATGTTTGA`      | 15623 | A_95_P266746 | DV162641     |
| 16169 | 191 | 19 | 631  | TACATAATTGAAGGCGAGGAGATCAATGTGTTCAAAAGGACATTCTCAAGTTTATC`    | 15636 | A_95_P299643 | FG639706     |
| 16170 | 191 | 20 | 657  | TGTGCAGTGAGGCTAAGCACCAAGTGTAAATCTTCTTTCTACATATTGGTATAATGA`   | 15638 | A_95_P198772 | TA16852_4097 |
| 16171 | 191 | 21 | 471  | CAAACACTGTTTCAGAAATAGCTCCAGCAATAATTGGTTCATCAGCTAAGGATTTTG`   | 15640 | A_95_P264981 | AM839155     |
| 16173 | 191 | 23 | 855  | CTAAACATTGCAAGTGGGCTGTTGTAACCTTAGCCAAAATGGGTGCATGGCAAAC`     | 15643 | A_95_P245652 | EB424878     |
| 16175 | 191 | 25 | 674  | CTCTGATAGATGTCGTTGCTATGTGTTACAAGTAATTTACACTGACATGGATCAGTTA`  | 15647 | A_95_P208722 | TA19030_4097 |
| 16176 | 191 | 26 | 526  | TGCTAGTGCTCTTAAGAGCTGATTTGATCTGTACTTAGCATGGAATTCATTTTCA`     | 15649 | A_95_P090153 | BP530831     |
| 16177 | 191 | 27 | 532  | TTCTTTTCAGGTCAAAGCACTTATTTCTTGGCTATACTTTTCTGGTGCCTTTAGTACAG` | 15651 | A_95_P096968 | EH620311     |
| 16178 | 191 | 28 | 841  | GATAAAGTAGCTGATGGTCTGAAGCTGCTAAAATGATTGAGGAGGAAAAGGATGT`     | 15653 | A_95_P203857 | TA17943_4097 |
| 16180 | 191 | 30 | 326  | GTAAAAGAGATGTTAATATCCGTCTGCTTGTAGAACACATTGTTGGAAAAGAATGTT`   | 15657 | A_95_P130132 | EB430135     |
| 16182 | 191 | 32 | 852  | TTTCGGGCTTAGTTGGGATGGTTTTCTTGTCTATCACGTTTATTTTGCATTTAAGAT`   | 15661 | A_95_P199212 | EB425297     |
| 16183 | 191 | 33 | 848  | ATTGTCTTTGGACGCTGGTTTGGTTCTCACGGACTGCATTGTCTATGTTAGCTGATAAG` | 15663 | A_95_P269491 | FG134412     |
| 16184 | 191 | 34 | 915  | GTATGGAAAACCTTATGTTTTACAGTTTTGGACTCGATGTTTCTATTTGCTTAGTGATG` | 15665 | A_95_P246637 | EB678829     |
| 16190 | 191 | 40 | 330  | GATTTCAAGGTCTGTGCTTTAATTTGCTACCTATTTATGACTTTTGTGTGATCATAGG`  | 15677 | A_95_P163387 | EH622428     |
| 16194 | 191 | 44 | 506  | ATGGTGCATAAATCTGGAGAATAGCAAAGCACTAAAAGAATGTGGTCTGATAGT`      | 15685 | A_95_P198322 | FG645435     |
| 16199 | 191 | 49 | 611  | GTCTTTAGGGAAGAAATGTTGTAAGTGTACTAGTATGTCTGAGTCAAAGGTTGTAAT`   | 15695 | A_95_P208298 | TA18938_4097 |
| 16200 | 191 | 50 | 226  | TTGCCTATGTTGGAATTCACCCATCATCTCAAATTCGAGTGGAGGTATCAATGATGC`   | 15696 | A_95_P151687 | DV162331     |

|       |     |    |      |                                                             |       |                           |
|-------|-----|----|------|-------------------------------------------------------------|-------|---------------------------|
| 16201 | 191 | 51 | 737  | AGGAAAACCTTGAGATCATATCAGCAACAGTTCATGACAGGGTCCGGACACGTGTA/   | 15698 | A_95_P152052 EB682346     |
| 16205 | 191 | 55 | 917  | TACGCAGTCGACAAAAGAATACGACTTTTCTCTCTGACGCAGGGAATGTTCTCAAA/   | 15705 | A_95_P245982 EB679909     |
| 16206 | 191 | 56 | 646  | GATTGTTATGGGAACCTTTGTATTACGGATGTCTACGATAATTTAATGAAAGGGAAGA  | 15707 | A_95_P210802 TA19473_4097 |
| 16207 | 191 | 57 | 36   | CTTTATGGGAATGCTCAGAAATTTCAAGCAATCGAGACAGATAATCGCAGGCAACGA   | 15709 | A_95_P223937 AJ718543     |
| 16208 | 191 | 58 | 577  | AATATAGTATAGGAAAATATGTCCTTCTCCTGCCACCAATCGATAACAAGATGCAG/   | 15711 | A_95_P107727 CV018510     |
| 16209 | 191 | 59 | 571  | GCCCGTTGAGGGTTTTCTTTCTTTTGTGTTTTAATAAATCTTGTCTTGACCCAGA`    | 15713 | A_95_P026056 TA18908_4097 |
| 16210 | 191 | 60 | 540  | GCAATCCAGTTTTGTGTTTTCTTAGCTGTGGCTTTTGAACCATCCAATTGCTTTCAAA` | 15715 | A_95_P026446 TA13256_4097 |
| 16219 | 191 | 69 | 753  | GTTACTGCTCTGTTGGGATATGCTGTGCTATCGAAAGAGAGTATGAAGAAGCGCAC    | 15732 | A_95_P019061 TA12425_4097 |
| 16221 | 191 | 71 | 308  | ACTGGAATTTGTGTGACTTTTCAGAACTTGTGAATTTGGTGGTACATGTACCTTATTT/ | 15735 | A_95_P119002 DV162081     |
| 16224 | 191 | 74 | 1405 | AAGGATCATCAGTGGGGTTACAGGTGCTGCAAAACAAACGATCAGAAACAGCTATTG/  | 15741 | A_95_P208352 TA18950_4097 |
| 16236 | 192 | 1  | 517  | TTCGACTGTCGATTTCGAGGTTCTGGGTTATTAACCTTCGGTGTTCGGTCCAAGGGA   | 15603 | A_95_P048811 BP132007     |
| 16237 | 192 | 2  | 494  | CCCAGAGGGTACAAGGGAGTTTTTCCAATTAAGGACAATCGAAACAAGATTGG/      | 15605 | A_95_P143427 EB446728     |
| 16238 | 192 | 3  | 291  | GATGTCTGGAGCAATTGTGTATTTTGTGACAAATGAGAAACCTTGTGTACATATCAA   | 15607 | A_95_P132192 EB432650     |
| 16241 | 192 | 6  | 431  | CTTTGGGGGAGGCATTAGTGTCTCATATCAAGGTATCAAAGGTGTAGAATCTTCAT/   | 15613 | A_95_P111262 CV020127     |
| 16242 | 192 | 7  | 872  | TGGAATCATCCTTGCTGGAGCTGGTCTAGGATATTGGTTGGTGCAGAAATTTGTTAT/  | 15615 | A_95_P011401 EB428037     |
| 16252 | 192 | 17 | 698  | GGTTCATCACCATTTGCACCGATCTTTCTCTATCTTCAGGTGGCAGTAGCTCAGAAC/  | 15633 | A_95_P040986 BP129974     |
| 16254 | 192 | 19 | 445  | TCTCAAAGAGGGACTCACCAGATACAGGTCAAAGAAGTTAGAGAAGAGGATGAGA     | 15637 | A_95_P032181 BP532124     |
| 16256 | 192 | 21 | 247  | GTATTATCAAGAGAAGGAAGGGTTTATACATTCTCCTGGGGGAATGAAACTAACTT    | 15641 | A_95_P136992 TA18912_4097 |
| 16260 | 192 | 25 | 675  | ATTGGTTGTGATAAGTCAACAAATACCGCGGAGCTTCAATTGATGTTTTATACTTCT`  | 15648 | A_95_P135977 EB439547     |
| 16262 | 192 | 27 | 525  | TTAAGGAAAAAAGAAGTACACCAGAAGGGAGGGACATCGATGAGATATTCAAGCTT    | 15652 | A_95_P123497 DW003354     |
| 16263 | 192 | 28 | 748  | TGCTGTTGGGCAGACAAATGTTATGCGAAAGAAAAAGCTTAGAGCTCACCATTTTGA   | 15654 | A_95_P230534 DV158163     |
| 16264 | 192 | 29 | 876  | TGCTGCTGCTGTTCTGTAATTCTGTTTGGGCAAGATGACTTATTTGTAGAGTACTATC/ | 15656 | A_95_P009141 EB424984     |
| 16268 | 192 | 33 | 375  | GAAATAGATGCGATTAAGAGTGGTTTTGGACACTTGGAGCGCTTCAGAAGACATGA/   | 15664 | A_95_P077625 BP527298     |
| 16273 | 192 | 38 | 789  | ATCATTGCAGCCGGAGAAGGTTGCTGGAGTTATTCAGACCAACATCCTTTGGAAGTA   | 15674 | A_95_P164762 EH624074     |
| 16274 | 192 | 39 | 682  | CATCTGAGCTTTTGTGGTAGATTTCTGTTGTTACTGAAATTTTAGATGATACGTTGCC/ | 15676 | A_95_P288133 FG640182     |
| 16277 | 192 | 42 | 356  | GAACATTTGAAAATCGGAATACTCCATAATTTCAAATATCAGTTGAGCTCGGTCCC    | 15682 | A_95_P023876 FG622950     |
| 16278 | 192 | 43 | 429  | TCCGTTGATGATTATGCTATGTATACCTTAATCTACATATGCCAGAACTTGCTTGTA/  | 15684 | A_95_P042201 BP130296     |
| 16279 | 192 | 44 | 525  | CATTACTTTGAATATGAGGACCCAAATGGAACAGTAAAAGAAATTTGGCGACAGGTT   | 15686 | A_95_P052451 BP132927     |
| 16281 | 192 | 46 | 782  | CTTTAGCGTTGTCTCCCTTGACGAAGAACAAATCGCTGCTAATCTTGTCAAGAATGGT  | 15690 | A_95_P192157 EB678171     |
| 16282 | 192 | 47 | 364  | CTTGGGAAAAAGCAACTCCCATTACTCCATTTACCAACATTGATCTTGGATTGAGGTC  | 15692 | A_95_P102827 CV016224     |
| 16285 | 192 | 50 | 547  | GTAAATACTAAGCTTTTCAGATCTATGGTACTTCGAGAGTTTTACGAATTTGGTTGCTG | 15697 | A_95_P119187 DV162265     |
| 16288 | 192 | 53 | 307  | ATCGGCCACTTATAGCCAAGTCAATGAATGTATCAGGTGTAATTTTGTAGATTTAACT  | 15702 | A_95_P195667 TA16167_4097 |
| 16289 | 192 | 54 | 333  | ATCAATCAGCCTGCCCAAGAATCTCATTTTCAGAGGCATACTGGTTATGAGTCCAATC  | 15704 | A_95_P058831 BP134574     |
| 16293 | 192 | 58 | 554  | CTAGCTTTATTTTCTGTATTTGTTGTTCTCTGTGTTTGATTGAAAGGAGTTGATTGCTG | 15712 | A_95_P027216 DW003889     |

|       |     |    |      |                                                             |       |                           |
|-------|-----|----|------|-------------------------------------------------------------|-------|---------------------------|
| 16302 | 192 | 67 | 1211 | GCTGGCTGCTGCTGTTTACAGTAGATCAGATACTAAAGTGTTCATAACAAGCTTG     | 15729 | A_95_P249857 AM087457     |
| 16304 | 192 | 69 | 305  | GCTTTGGAAATCATTCTACACAAAGGGGAAGGTCGGTCATGGTTATAACATTGGAAC   | 15733 | A_95_P070090 BP192518     |
| 16312 | 192 | 77 | 766  | CTGTTCAATTGTTGGGTTTTGTTGAACCATGTCTACGGAGACTGTAACTTTTATTAT   | 3665  | A_95_P000026 EB439159     |
| 16316 | 192 | 81 | 314  | GATATGGTATTTTAAAGTGGTTAGTCCGAGTACATACATGGTTATTATGCTCCCATGG  | 15755 | A_95_P113667 CV021246     |
| 16318 | 192 | 83 | 367  | GCTGATTGGAATGAGTAACATTAGTGTCTGTTAGGCTACAAGTCTGTAAGATTAT/    | 15759 | A_95_P202212 TA17587_4097 |
| 16320 | 192 | 85 | 504  | AATGACTTTGATAATGGTACGTTGCCATTCTATTTGATGCCGTTGAGGAGTTCTAGG/  | 15763 | A_95_P151597 EB681832     |
| 16322 | 193 | 2  | 576  | ATGATGTTCCCTACTACTTATAAAGACGCTGTCCAAAGTTCAGAAGAAGATAAGTGGA  | 15766 | A_95_P261861 BP133763     |
| 16331 | 193 | 11 | 2610 | GGATTATCTAACCAACAAATGAATGAATGAAATAAAGGACGGTGGCTTTTGTGAAC    | 15783 | A_95_P258326 AB263747     |
| 16342 | 193 | 22 | 861  | AACTTAAATGGAAGAAAACCATGTAGCTGTTGAGATTTCTGATAACATGGAGCAGTT   | 15804 | A_95_P201212 TA17375_4097 |
| 16343 | 193 | 23 | 581  | GAAGCTGAACATCTAAGCTGAAAACCTGAGGAGAAGATACTTAAAGATACGGTTGA/   | 15806 | A_95_P119017 DV162099     |
| 16345 | 193 | 25 | 443  | TGGGTTTCATGTTTGTACTTGGTGGTGTGGGATTGTGATGTTGGATTTGGCAACTGA/  | 15810 | A_95_P097578 DV159157     |
| 16348 | 193 | 28 | 279  | TTGGGTACTTGGGGCTGAAAAATGTTAGGTTTCTAAGTTTTGCTGTTCAATGATGT    | 8937  | A_95_P000091 AJ717873     |
| 16350 | 193 | 30 | 1054 | CCAAACTGCCCTACTTATTAAGAGCGTGGCACAATCACTATAAATAAACATTATTT/   | 15819 | A_95_P022661 TA17435_4097 |
| 16355 | 193 | 35 | 694  | TGTCAAGTTTCCTCAGTTCCTCACCGGCAAGAGGAGGCCATGGAGAGCTTTTCTTTTA  | 15829 | A_95_P144912 EB448466     |
| 16357 | 193 | 37 | 814  | CGGGTAGTCGATATGTGGTCACATGATGGGAGTTTTGAAGTTTTTATTGACAATCAA/  | 15833 | A_95_P133897 EB435594     |
| 16359 | 193 | 39 | 179  | TATATCACGCCACTGTTGCAATTTGGGATTTTTGGTTGAGCTTGATAATTGTTGTC/   | 15837 | A_95_P100178 BP535252     |
| 16375 | 193 | 55 | 682  | AAAGGGGAGGATAGGAGTATGTTTCTCCTTACACCAATGAATGTATCATTTTGACCC/  | 15868 | A_95_P243967 EB681148     |
| 16376 | 193 | 56 | 719  | ATGCTTAATGGATGTACACTTTTTTGGTGAAGAGAAAAGTGAACATTAAGTACATC/   | 15870 | A_95_P250622 FG642423     |
| 16377 | 193 | 57 | 1761 | CTCACTGATCAGAAAATGGTCTCTTGTAGTATCTTCTCCATCTGTTGTAGCACCTTT/  | 15872 | A_95_P239420 AY639145     |
| 16378 | 193 | 58 | 529  | CAATTGGCTTGGTTGATTTCTTTAGCATGATAAGAAATGTAGGAGGATTTGGGTAAA   | 15874 | A_95_P041376 BP130076     |
| 16384 | 193 | 64 | 553  | CCTAGTACCAAGTCCATTTTCTTTTAGAATAGCACAAGCTTTTCTGTGTATATATTCC  | 15886 | A_95_P202872 EB445968     |
| 16390 | 193 | 70 | 752  | AACTGGAAGAGATACATCACCAATGACAAATTTAAGGCTCAACGACAAGCTTCTCAC/  | 15898 | A_95_P146912 EB451085     |
| 16392 | 193 | 72 | 1512 | TTTGTGGTTATGTTATCCTTTTCCAAGTAAAGCAGTCGTGGCACTGATTTCTTCAGG/  | 15902 | A_95_P017296 TA12455_4097 |
| 16393 | 193 | 73 | 416  | GGGGAAAATTGATGCAGCTGTTATTTGGTTATATATTTATTTCCCTCCCTCGTCTGC/  | 15904 | A_95_P071550 BP525731     |
| 16394 | 193 | 74 | 1038 | ACTTTTGCTTTTGGCGTCTGTTGGTTGTCATAAACAGAGGAAGATAGATAGTTGGTT/  | 15906 | A_95_P199072 TA16913_4097 |
| 16395 | 193 | 75 | 710  | GTTGTAGAGCTTTAAGTTTTGAACTAAACCTTTTGGTCGGCGAATTTGATGATGAATA  | 15908 | A_95_P019126 TA22209_4097 |
| 16396 | 193 | 76 | 778  | TGATGCCGCAATATTGCAGTGTATCAATTAACGATAGAAGCTTTTAGAGGATTGTATC  | 15910 | A_95_P141427 DW000158     |
| 16400 | 193 | 80 | 818  | TATGGGTGACTTGTCTGGATTGGTGAACAAGATACAAGACGTGGTCCCAATGGATC/   | 15918 | A_95_P267731 DV161452     |
| 16401 | 193 | 81 | 839  | ACTCCTGCTACGGTTGTGAGTGAATTTATACTTTTCTCGCAATTTATGGTCTCGTTGTA | 15920 | A_95_P226514 DV999521     |
| 16404 | 193 | 84 | 766  | TGATGTTGAAGGAGCAAATTGAGGTGCTTCTTAGAGAAAATACCATTCTCAAACGTG   | 15926 | A_95_P218537 TA21199_4097 |
| 16408 | 194 | 3  | 110  | ATGCCCAAGTAAATTAAGTAGCCTACTCTGTGACGCCTTTTTCTCAGTTGTTGACTTC  | 15768 | A_95_P040231 BP129772     |
| 16409 | 194 | 4  | 314  | TCAGAAACGGGGGAAGAATCAGTTACTTAGTGTGAGTATTATTAAGGTGTTTTAT     | 15770 | A_95_P158187 EH616256     |
| 16419 | 194 | 14 | 2030 | CTATGGAGTTTCAGTTACCTACACTTTCCACTTATGGATTGAACTAAAGATTCCATTT  | 15790 | A_95_P188417 TA14566_4097 |
| 16426 | 194 | 21 | 687  | TTGCACTGCAATGTGTTAGATACCTCTAGTAAGCTATCATCAATGCTGAATAACTACT  | 15803 | A_95_P131097 EB431220     |



|       |     |    |      |                                                             |       |                           |
|-------|-----|----|------|-------------------------------------------------------------|-------|---------------------------|
| 16430 | 194 | 25 | 369  | GGTCAAAACAGATGTGTTATGTGGTGACTGCCATGGTGCTGGATTTCTTGGTGGATC   | 15811 | A_95_P029006 CV019724     |
| 16431 | 194 | 26 | 481  | TAACAGCACTTGCAGTAGCTATATGATCCAAATTCACCTGGATGTACTAGCTTTGCTG  | 15813 | A_95_P026581 TC68927      |
| 16435 | 194 | 30 | 443  | CTTGGTTTAGGTGTAACCTCTCAGTTGTCTTAATGTAATAATTGACAAGTTACAGCTG, | 15820 | A_95_P098208 BP534364     |
| 16436 | 194 | 31 | 96   | TTCCTCGGGAATCTGTCGTGTTAACCTAGTGTACTTGTATACATTAGCCATTGACTCC  | 15822 | A_95_P164047 EH623173     |
| 16438 | 194 | 33 | 464  | TAACTATAGCATCCAGAGGGGAACGTAAGTTGATGGTCAAAGATCTACTGTCGTTA    | 15826 | A_95_P198277 TA16744_4097 |
| 16439 | 194 | 34 | 448  | CATGTGTCTTTGTGGTTTTGTAAAGTTGAGATGCTTATAGTCTTAGGGCTTGTGTATA, | 15828 | A_95_P125357 DW005153     |
| 16443 | 194 | 38 | 891  | GGGTAAGTCTATATAGAGACATGTTTGGAGAATTGCTATTTGTTACATCGACAATCGTA | 15836 | A_95_P008121 DV157767     |
| 16444 | 194 | 39 | 87   | GAGTAGCTCTTTTCTTAAATTGTTTACTTTTGTCCAACCTCCATGCAAAGTCTCTT    | 15838 | A_95_P129577 EB429568     |
| 16445 | 194 | 40 | 782  | ATGATGGCATGAGACGCCAATGCGTGACAGAGCATGAATTCATGAGTCGCTAGAAC,   | 15840 | A_95_P234259 FG155496     |
| 16451 | 194 | 46 | 893  | CAGCAACCTTTTGTACACCTCAAAAAGGAGTACAACGGCATCTTCTGGCAAGAAG,    | 15851 | A_95_P185247 TA13871_4097 |
| 16452 | 194 | 47 | 1921 | GTTTTTGGTAAGGATGCTTGTGAATTATGTTACCATGAGACAAAGGAAATGGTGCC    | 15853 | A_95_P034653 AY081175     |
| 16454 | 194 | 49 | 503  | CCGTTGCAGATCCCTCGTCCAATGCAGCCATTGCTTCTTCAGGCTATTTAAATTTG    | 15857 | A_95_P006856 AY045572     |
| 16456 | 194 | 51 | 542  | CTGGAGCAATTGTTAATTCAAAAGATGGTCCCTCTCGGGTGATTTCTTTGTACATCT   | 15861 | A_95_P123192 DW003074     |
| 16458 | 194 | 53 | 208  | GCTATTATATCCTTTCCCATGGAAGACTTTCTTGCAAGTCAAATCCGAAGAAATTTG/  | 15865 | A_95_P027961 TA20238_4097 |
| 16459 | 194 | 54 | 0    | CAATACAACCTTTGAGGGAGGAAGTGGTTTTATTCTAGTATTCAGGCGTTTTTGATAT  | 15867 | A_95_P020076 A_95_P020076 |
| 16465 | 194 | 60 | 252  | AGTTGAGGCTGCTAAGCAGATTCTGCTGGTATTCAGAGCACCCACTCATTTAAACCA   | 15879 | A_95_P112477 CV020700     |
| 16466 | 194 | 61 | 1616 | TTGCGAGATGTCACCTGCTAAATGAGACTGGTTGGATTGCTTGAATCCCCTAGTAGT   | 15881 | A_95_P259606 TA13128_4097 |
| 16468 | 194 | 63 | 424  | GTGTACCCATTCAAGGCATTCAACCAGACAATTGAGATATAGTCTATGGTTTCGCTTA  | 15885 | A_95_P305418 FG636725     |
| 16470 | 194 | 65 | 458  | GAAGGTTGAGCTATCAGCACTCTTATGCAATGACATGATATCTTAAAGGAATAAA`    | 15889 | A_95_P016721 BP534468     |
| 16472 | 194 | 67 | 815  | ATGAGGTGACTGCTGCTATCTTCCAATAGAGTAGCCAGATCAGAGTGAGTAGTCTAA   | 15893 | A_95_P311218 FG141044     |
| 16477 | 194 | 72 | 749  | CTGTGTTTGCATATTTTTGATCGCCTTCTCATATGCACAAGAGATAAAGCTATAACT/  | 15903 | A_95_P025196 TA17041_4097 |
| 16480 | 194 | 75 | 639  | GTGTTGCCCTCCGATTTTGGTTTTGAGGAATTACCCTTATTTATATTAACCTTCCAA`  | 15909 | A_95_P221467 TA21825_4097 |
| 16484 | 194 | 79 | 347  | TCATAACACCATTATGTTGAGATTCCTTGGACCGATACTTCGGAAGTGTCTTGTGAGC  | 15917 | A_95_P112667 CV020782     |
| 16492 | 195 | 2  | 297  | ATTCAAACGTCTTATCGTGACTTGAGGTGTTTCGCGCACCTACGAAAATGATGGTTTT  | 15932 | A_95_P042471 BP130368     |
| 16494 | 195 | 4  | 721  | ATTGAAGACCTGAAAAGAGTTCCTTAGCCATCCTCAGGCTCTTGCACAGTGTGAGAAC, | 15936 | A_95_P135172 EB438457     |
| 16498 | 195 | 8  | 0    | ACAAATTTGGATTATGATATTTTCATGCGAAACGGGGTTGGAGTTCCTTGTGTTTTGT  | 15944 | A_95_P296573 A_95_P296573 |
| 16503 | 195 | 13 | 481  | GAGCTGTAGTCAAGCCTGGAATTTGTTCTGGTGTGTTTTAGAATTTACTCAAATTTCA/ | 15954 | A_95_P105507 FG644201     |
| 16504 | 195 | 14 | 917  | TATTTGCCTTCAGATATACACCACAAGTGCTGGTTTTATTGCCCTCTCCTGCTTGATC  | 15956 | A_95_P202497 TA17649_4097 |
| 16505 | 195 | 15 | 602  | GGACAGATGTGCGTTGTTACTTGTTCATGTTGTATTTGTTATTTACGTCTAACAGAA(  | 15958 | A_95_P122517 DW002492     |
| 16507 | 195 | 17 | 311  | TTTTGCAAAATGGCATGGGTTCTTGTATGGCAATTCGAGACTGAGCGCGGATTTGT/   | 15962 | A_95_P105922 CV017693     |
| 16511 | 195 | 21 | 386  | TTGAATGAGAAATTGCCTTCACTAATTACCCAGTCAATGCATGTAAGAGGCTTTTAC   | 15970 | A_95_P203202 EH615570     |
| 16514 | 195 | 24 | 515  | TTCCCCCTTTGTTTTACATGTGAATTGGTTTGTACCTATTTTATGGTGTATCGGC     | 15976 | A_95_P097268 BP533963     |
| 16521 | 195 | 31 | 383  | ACATGTGGTTCCTTTCTTGTAGCAAATGATGCTGCAGAGAGGACTCAGTCTCATGTC/  | 15990 | A_95_P214947 FG142908     |
| 16523 | 195 | 33 | 327  | ACGTTGCTATTTCTTGGTGTGGCTTTCTTGTATACAAGAAAAACGGTTAGAATCCA,   | 15994 | A_95_P211557 TA19639_4097 |

|       |     |    |      |                                                               |       |                           |
|-------|-----|----|------|---------------------------------------------------------------|-------|---------------------------|
| 16527 | 195 | 37 | 350  | CTTCTTCAGCTCTGCAGCTCCTATAATCTTTCAAGTTGTTTGAGAACAATCTGTGTGAT   | 16002 | A_95_P053061 BP133081     |
| 16529 | 195 | 39 | 916  | TCCCGAGATATCGTCTGTTCTGTCCGGCTGTTTTAGAAAGTAATGGGACTCAATTTGAT   | 16006 | A_95_P258581 DV162128     |
| 16532 | 195 | 42 | 541  | GCTGGACAACCTTTGGCCTTTTAGGTGAATATATATGGCTTGATGATAATATGCTGAA/   | 16012 | A_95_P197262 TA16523_4097 |
| 16535 | 195 | 45 | 405  | GCATGAAAAAGGCCAGCCACTGTGCATTCTCTTATGTTTCTATTGAAACAGATTCTCT    | 16018 | A_95_P188847 TA14660_4097 |
| 16537 | 195 | 47 | 345  | CAAATTTCCCTAAGACAAATGAGAACTTCCGCCTCATGTTTTGACACAAGGGCCGATTT   | 16021 | A_95_P104337 CV016949     |
| 16538 | 195 | 48 | 1889 | GGCAGCTGTAATTCGCCATTAAGATATTTGTATAACATAAAATCTGTCAAAGTAAGGTA   | 16023 | A_95_P007411 AB063573     |
| 16539 | 195 | 49 | 1102 | AACAGTTTGCTGGGGACAAAGAGACCGCTGGTTAAGCTTTGATGGTGTAGAAGATT      | 16025 | A_95_P214897 TA20362_4097 |
| 16541 | 195 | 51 | 676  | AACCTTCCCCTCGAGATAACTTGAACCCTTAAGTGAATCTCAATGGTTTCGTAGATC/    | 16029 | A_95_P127157 EB426620     |
| 16542 | 195 | 52 | 491  | CTGATGTGACTGATGTTCTAACAGTGACTTTGATCAACGAGTTCTGCGATATTCCTCT/   | 16031 | A_95_P202617 TA17674_4097 |
| 16544 | 195 | 54 | 508  | TCAGCACTGTAGTACAGTTCTTTCTTTCTTTCTTTCTTATGCTATGATAAGTGGAACTG   | 16035 | A_95_P021906 TA13884_4097 |
| 16546 | 195 | 56 | 3032 | CCTGTACAGCTTCTTGCTAATACTAGTCCATGATAAATTCAGCTTTTTTGGTTCTTTTC   | 16039 | A_95_P032426 AB071436     |
| 16549 | 195 | 59 | 1144 | GGCAGAGAACATGCAGCCTGTTCAAGTTGATTAATGTCTTTTACAATAATATATACT     | 16045 | A_95_P014021 TA17144_4097 |
| 16552 | 195 | 62 | 1541 | TTGAGCTTACAATTGTTAAAGAGAAATACCATGGATTGATAATGGAGCTGTTCTCGC     | 16051 | A_95_P191452 TA15240_4097 |
| 16554 | 195 | 64 | 475  | GGCTGGTTTTGAGACTATCGATGCTTACTATTTTCATACATTTTCGGTTCCAATTTAGATC | 16055 | A_95_P125062 DW004896     |
| 16556 | 195 | 66 | 516  | GTAAGTCCAGAAAGAATAGCTATCTGTGTATGCAGAGTTGAATGGGTTTTCAAAA       | 16059 | A_95_P181902 TA13088_4097 |
| 16559 | 195 | 69 | 507  | CATGAAAGTGATACTCAGGGTGGGCATATTGATGGGGTTAATTTCTTCTCTAGTGAC/    | 16065 | A_95_P160417 EH619110     |
| 16563 | 195 | 73 | 384  | GGTCTCTTTCAACATGTAGATCGAGAGACCACTCAGTGAATTTCAATTAATTATTC/     | 16073 | A_95_P032391 AB032547     |
| 16564 | 195 | 74 | 707  | TTGGGGCCGTCCGATGATCTCACTGTCGTTGTTGACTGTTGATATTGTTAATATTCC     | 16075 | A_95_P135002 EB438075     |
| 16569 | 195 | 79 | 640  | AGCAAGTCTGATATGAAGCTAAGCAAAGGACGCGCATATCATGTTGTCATTGGTCC      | 16085 | A_95_P272046 EB447061     |
| 16570 | 195 | 80 | 908  | TGGAAGCCATGATCTCTCGTTGCTGTTGAAACACTGACAGAGCTAAGCAAAGTGAC      | 16087 | A_95_P185152 EB680105     |
| 16571 | 195 | 81 | 458  | TAAACGTCAAACATCAAGAATACTTTGCTGATAGCCCATCTGCTGGTTAGATCCTGC     | 16089 | A_95_P105137 FG638862     |
| 16579 | 196 | 4  | 764  | TTCTTCTTTTTCCTTTGTGTGGTCTTTTTCGGCTGTTTTGGTTGCCTCAGGGCTTTTGG   | 15937 | A_95_P215617 TA20527_4097 |
| 16584 | 196 | 9  | 761  | ATTGTCTAAAATAGTGGGCTTACATGAGCTTAAGCAGCAACTCCGGAAATGGGCAA      | 15947 | A_95_P139052 EB442754     |
| 16588 | 196 | 13 | 803  | TGAGGAAGTGGGAATGCATATGTTTTGCGTCTCCTGAAGTATCCTTCAGCAAATTAG/    | 15955 | A_95_P010486 TA15278_4097 |
| 16589 | 196 | 14 | 226  | CAAGGCTTGAGGTCAGGAAGTCTTTGAAGACATTGCTTATTTGGGCTTAATTTATA      | 15957 | A_95_P137392 EB441134     |
| 16590 | 196 | 15 | 837  | GTAAGTCTTTCAACTAGTATGATAATGATCCACAAACCTTGTAATAAACTCCCTTC      | 15959 | A_95_P224882 DV999092     |
| 16596 | 196 | 21 | 394  | GGTATTCTCTTCTTCTTAGTGATCTGGAAAACCTATCTGAGCCAACCTATTCTGGAGC    | 15971 | A_95_P045936 BP131266     |
| 16598 | 196 | 23 | 822  | CCAAAATGTACCTCAATACTCTACTGAATTATTTATTACAAGATTACCTGCCGGTTTT    | 15975 | A_95_P188017 TA14477_4097 |
| 16600 | 196 | 25 | 273  | AAGGGAATGCAGAAATTTAACAGTGTGACAGTGTGTTTCATCCAGTCTTGTTATTTAC    | 15979 | A_95_P163057 EH622071     |
| 16601 | 196 | 26 | 611  | TCCTCTGTTCTATCACAGAGCAAGGTCAGGAAAGAGTTGTATTGTATATGAAATCA/     | 15981 | A_95_P189517 CN949733     |
| 16609 | 196 | 34 | 125  | GTATGATTTTGTCTGGATCTAATCTCCACCTAGTTGATTTCTTTGACCCGATCAAAAA    | 15997 | A_95_P254864 FS391062     |
| 16611 | 196 | 36 | 366  | AGGGTTTGTGTGGGTAATGATTGTAGATCGTTTTATCACCTGTTGTGGATTAGAATTT    | 16001 | A_95_P005826 TA16418_4097 |
| 16615 | 196 | 40 | 875  | TCCACTTCAAGTGAACAAGAAGCTACTACGTGAATATCCACATCTGTTCAATTACAC     | 16009 | A_95_P228314 EB450387     |
| 16618 | 196 | 43 | 426  | GGAATAACCCATGGAGGAATTCATCAGATTCTGACACATCTCATCTCTCTCTCT        | 16015 | A_95_P115142 EB449164     |

|       |     |    |      |                                                               |       |                           |
|-------|-----|----|------|---------------------------------------------------------------|-------|---------------------------|
| 16620 | 196 | 45 | 850  | AGCACAAGTATAATGCTTTAGAGTCCATCCGTTTCCAACCTGGTTTGATTTGTATCCA(   | 16019 | A_95_P187767 TA14419_4097 |
| 16621 | 196 | 46 | 733  | CTGTCATCATCGTCAGTATATGGCAACAGTTATATCGAGCATAGTTATCGCTCCAAAC    | 16020 | A_95_P013061 EB439836     |
| 16622 | 196 | 47 | 885  | GATGTGCCTTACCATATATTCTTCTTTGCAACTGTCATTGGGATCATTCCAGCTGCTTA   | 16022 | A_95_P265311 EB440010     |
| 16623 | 196 | 48 | 725  | TTGTCTCGAGACTTTACCTTTTGGGCTTTACCTATCACTGTCAATACTTATATGCAGTT(  | 16024 | A_95_P286268 DW000312     |
| 16630 | 196 | 55 | 472  | CCGAGGCTTTGTCACGAGATTCTTTCTCTTGATTTCTTTGACCTTTATTTGATGTATA/   | 16038 | A_95_P031396 EB683293     |
| 16639 | 196 | 64 | 1659 | GCTGTCATGAATATGGATTTTCAGGTTTTCTGCTTTCAATTCTTTTATTAGGAAGGATAAC | 16056 | A_95_P026331 TA12920_4097 |
| 16642 | 196 | 67 | 264  | GGCATCATTGGACTTGAAGTACCACCTTAATCTGTAACCACAATTTTTGGACTTTAAA`   | 16062 | A_95_P033314 AJ344613     |
| 16644 | 196 | 69 | 49   | CTCTGCGTTCATGTGGCTAGTATTTTTTCAGTTTGGCTCATTCAAACCTTATTTTTGTG/  | 16066 | A_95_P131077 EB431207     |
| 16645 | 196 | 70 | 761  | TTCATATGGAGGTTGTTGAGCCTCAGCCTAATCGGCCTAAACTCCAACCTTACCCTTGT,  | 16068 | A_95_P132017 EB432449     |
| 16646 | 196 | 71 | 361  | GTCAAGAGGAAAAGAAATGCCAATGGGCAATCTGATGGATCTTCAATGGTTACTTGGC(   | 16070 | A_95_P095788 BP533342     |
| 16647 | 196 | 72 | 430  | TTCCATAGTTGGCAATGTAGCTGCTCAGGTGACTGTTCAGAAGTTTATTTGTTTAAATT(  | 16072 | A_95_P287493 FG633763     |
| 16651 | 196 | 76 | 831  | TAGACTACATAGTGAGGTTGGTTTGTAAATGAACAATGACTGGTGATGCACAATGTTT`   | 16080 | A_95_P012666 TC44437      |
| 16652 | 196 | 77 | 933  | AATCTTATGCGACTTTTTGTTACTAGAATTATGGGGATGTTTTGACTCGTATGTCAAC/   | 16082 | A_95_P191952 TA15349_4097 |
| 16655 | 196 | 80 | 480  | TCTCTTTGTGGCAACTTGCTTTATGCTGGAATGGGTTCTAGTGCTGCAAGAGAAGCC(    | 16088 | A_95_P041171 BP130024     |
| 16657 | 196 | 82 | 391  | CTAGGGGAAGGAAGATTAAGGTGAAACTCTAAACTTCTCATATTTGCTTGATTTG`      | 16092 | A_95_P026286 EB437588     |
| 16658 | 196 | 83 | 511  | ACTGTCCAATGTAGACTCTCCTGTCCAATGATGAATTGAAATCGAAGTTTCTGCTGT.    | 16094 | A_95_P211197 TA19558_4097 |
| 16663 | 197 | 3  | 835  | TTCCAACCTTGCTCATGGTGTTATGTGAAGGAATGATAAGTAGACGCTGAGAGGCCAA    | 16103 | A_95_P186232 DV999956     |
| 16666 | 197 | 6  | 443  | ATGGAAAAGCAATTAACCTGTACTTTATCATCATACCAAGTCCACTCTACTTCAGCTTCA  | 16109 | A_95_P060570 BP135027     |
| 16667 | 197 | 7  | 606  | TCAGAGGAAAATCGCATGGAGGAATGAACAATCACTCCCTATATTCTATATTCTCAA     | 16111 | A_95_P201297 EB677527     |
| 16675 | 197 | 15 | 292  | GTTGTTTTATCATCCCTGTGGTGAATGTACATTCGTGTATAGTGCAATTTTCACTTCC    | 16127 | A_95_P213562 TA20074_4097 |
| 16679 | 197 | 19 | 467  | AACGTGGACATGCTTGATGGGGTAACAGTTGTTTCGATCTGAAAAAGGGTTTAAAGTC    | 16135 | A_95_P004801 EH664411     |
| 16682 | 197 | 22 | 581  | ATGGTGGAAATCAAGGTTATGGAGGTTCTTATCGACACGGTAGAGACTATCATCGCA     | 16141 | A_95_P140587 EB679251     |
| 16692 | 197 | 32 | 472  | ATCTGTAGTCTTGATTAAGAAAGAACCAGGGGTTTTGAATCTTCAATGACTTGATGA(    | 16161 | A_95_P183137 TA13390_4097 |
| 16693 | 197 | 33 | 756  | AGGTGGTATGCTAGTGTCTTGGACTTGGTTTTATTGTCTTAGAATGTTGTTTCTTGAA,   | 16163 | A_95_P246457 EB444815     |
| 16696 | 197 | 36 | 130  | TGTTTGCTTGTTCGATTTCTACCACTATATAACCCCTCCCAATTACCCTTTTGGACAG/   | 16169 | A_95_P241535 AJ718381     |
| 16698 | 197 | 38 | 902  | GGCCATCTCCTTTAAACTCTTACTTGAATGTTGCATTTTCTTAACCTTGAGCAAAAA     | 16173 | A_95_P214917 TA20366_4097 |
| 16700 | 197 | 40 | 862  | AGCAGATGTGCATCGACTACATGAGCGCGAAGAAACACTTTTCTCAGTTTATACTGA(    | 16177 | A_95_P272611 FG157459     |
| 16701 | 197 | 41 | 404  | TAACATCGAGTGGGCTCCTGATTGTTAAACTCGAAATGTATTCCCTTATTCTCCAGG`    | 16179 | A_95_P076090 BP526891     |
| 16702 | 197 | 42 | 834  | AGGACTCAACAGAGAGGATGACGAGTCTAGTAGTACCTGTCCCTACTATTTTAGAGC     | 16181 | A_95_P246567 DV157934     |
| 16704 | 197 | 44 | 1726 | GTGGTGTGGTATGATATTGTAGTAAGTTAGATCCATTTGCCTTTTGGTGTATGATTTT(   | 16185 | A_95_P034773 AY639866     |
| 16705 | 197 | 45 | 385  | ACTTTCCCTTGTGATCTTGTGTCGAAGAATCCCCCTAGATTCAAGAAGAAAAACCA,     | 16187 | A_95_P162312 EH621258     |
| 16706 | 197 | 46 | 957  | AATGTTGAATGCAACTGCGCGGGATTATATTTATATTTTCATGCTGAATTTACGCTGCT   | 16189 | A_95_P176467 Y16644       |
| 16709 | 197 | 49 | 824  | GGACAGGCAGATAACAATCTGAAGCTTATGTTCTTACTTGTGGATTTCTTGTGTTCC`    | 16195 | A_95_P294183 EB451619     |
| 16713 | 197 | 53 | 824  | AATGAAAAGCAGTACCCTGAAATTGGCCAGACAGTTACGTTCTCCTGAGTTTCAGCT/    | 16203 | A_95_P264536 FG156146     |

|       |     |    |      |                                                            |       |                           |
|-------|-----|----|------|------------------------------------------------------------|-------|---------------------------|
| 16715 | 197 | 55 | 412  | CTTACGAGTAAGCAGTAAGTTTTGACAATCCCACACCAAATTGTACCAATTTATGTAT | 16206 | A_95_P223007 TA22153_4097 |
| 16716 | 197 | 56 | 343  | TTATACCAGTTTGACAAAGGGTGGCCCTCTTCCTAATTATTACAATGAAAAGTTCT   | 16208 | A_95_P143222 EB446556     |
| 16717 | 197 | 57 | 953  | GCTCAAGGATATTTGTAACCTAGCTGTTTCTGAATCTTATGTGTACGCAAATACAAC  | 16210 | A_95_P179922 TA12617_4097 |
| 16719 | 197 | 59 | 652  | ACTAAAGGAAATGAAGTCCAGCAAGAGGAATCAAGTGATCCAGTTATTGGGGGTGC   | 16214 | A_95_P065540 FG194561     |
| 16723 | 197 | 63 | 369  | AACTATAATTGATGGGGTTGAAACAGTCGATGATGGCGGTGATTGAAGCAGCGGA    | 16222 | A_95_P159007 FS423299     |
| 16726 | 197 | 66 | 964  | TGTTGTAATATCATAATATGGGAATTGGATTATTATGGGAAAGTGTTGGAGGGAA    | 16228 | A_95_P222927 TA22137_4097 |
| 16731 | 197 | 71 | 816  | GATTGGTGTGAGAAGTCTCATGACTACTGCAGTGACTATCATGCTTCTCTTGC      | 16238 | A_95_P120647 EB441655     |
| 16733 | 197 | 73 | 288  | GGAGAAAAAGTTGCAAATAAGTGTGTGTGTGTGCCATGGCTGTTAATGACAA       | 16242 | A_95_P091403 BP531339     |
| 16736 | 197 | 76 | 792  | GCTGAAACTATCTTTGTCATCATCTGTTGTTCTTTTTGCATGTGCTTAATGCC      | 16248 | A_95_P268776 DW002989     |
| 16739 | 197 | 79 | 804  | ACAATGGGTGGGATGGCTGTGAATGGACTCCACATCATGCTAGACACTTTCTT      | 16254 | A_95_P305603 FG134987     |
| 16740 | 197 | 80 | 661  | CAATGCAAGCGGCTGTTGATAGATTAAGTCATTCAACAACTTCTTAACTTTT       | 16256 | A_95_P160497 EH619192     |
| 16741 | 197 | 81 | 646  | AGAAGCTTGACTCTGACTGTAGCCTGTGACAGATGGTAAGAAATGAAGCCAA       | 16258 | A_95_P132162 DV999374     |
| 16744 | 197 | 84 | 822  | ATTAGTCGATCCATGGACCTCGCAATTTTCTCTGTTCTTTTTCTTTCTGGG        | 16264 | A_95_P031781 EB443556     |
| 16751 | 198 | 6  | 328  | TCAGAATCCTCAAGCATTCTTCAAGTTCAGCAACTCCATCCGAATCACCGGGA      | 16110 | A_95_P094703 BP532840     |
| 16752 | 198 | 7  | 266  | TCACTTGATGCCAGATGGGCTTTATTGACAGTTTGTTGGTTCAATGCATCCAC      | 16112 | A_95_P210907 TA19495_4097 |
| 16760 | 198 | 15 | 908  | GGTGTATGGTGTCTTTAAACAGCCTTGGATTAATACCATGTATCAAGTCTGAT      | 16128 | A_95_P181972 TA13106_4097 |
| 16768 | 198 | 23 | 411  | AAGGGACGGACTGAGGACTATTTCTCAAAGTAGGATATTTCTTCTGAAAAT        | 16144 | A_95_P003621 AJ272037     |
| 16770 | 198 | 25 | 1376 | AAATGCATCCTCCATCTCCCTTATGTTGTAACCTTTATGTAATGAACTACC        | 16148 | A_95_P017186 AY660024     |
| 16773 | 198 | 28 | 741  | TGTGCATGTCTTGAAGAGAAGGAGATGGGAAAGAAATAAATGGAAGTTGTA        | 16154 | A_95_P024456 DV158596     |
| 16774 | 198 | 29 | 859  | GGTATGCCCTGCTCTACATTATGGACGCGGCTTTATCGGTTTATTTAGAG         | 16156 | A_95_P215727 TA20551_4097 |
| 16775 | 198 | 30 | 811  | GGAATTTCTCACCTTTAAAGCATCGTTTATTGATCTTCATGTGGGAAGCCAC       | 16158 | A_95_P292913 EB428959     |
| 16776 | 198 | 31 | 533  | CTGAACATTCTGTCCATTTGCTTATGTTCTTGAATTTGAGTATTGAGTCTTT       | 16160 | A_95_P019026 TA13020_4097 |
| 16777 | 198 | 32 | 780  | CTTGGACACCTAATTCATCGTAAGGTAGTGGCTAAGATATCTATTGAATAT        | 16162 | A_95_P015736 DV160851     |
| 16783 | 198 | 38 | 857  | GCTCGGGAACCTAGACCTTGAAGCTTTGATAAATCGGAAAAGAAAACCAT         | 16174 | A_95_P225862 EB431697     |
| 16788 | 198 | 43 | 758  | CACGCGCAATGCAATTACCAATTCTTGAACAAGACAACTGAATATTTGAT         | 16184 | A_95_P151392 EB681596     |
| 16791 | 198 | 46 | 806  | AAGATCCAAAGGTGGTCTTTTCTAGTACTAATGAAATTAGCTGGCGGCTGT        | 16190 | A_95_P131087 EB431214     |
| 16794 | 198 | 49 | 218  | ACAAAATCGGGCATTGAGGCAATCCAACAGTATCTTGGCTTGGCAAATGG         | 16196 | A_95_P141037 EB444841     |
| 16799 | 198 | 54 | 754  | CAAAATGGTTCAGACAACATTGTATGCTGTTGATTAATACTTTGTTTAA          | 16205 | A_95_P016661 TA13240_4097 |
| 16802 | 198 | 57 | 1522 | ATTGAAGCAATTTCTAGCTGAAATGATGTAACCTTTGGCTTCTATATGCT         | 16211 | A_95_P184947 TA13805_4097 |
| 16803 | 198 | 58 | 518  | ATAATCAGTGTAGCTCCTGGATCAGTTTTATTTAGTCTCCTCCTATTTT          | 16213 | A_95_P316413 FG188473     |
| 16805 | 198 | 60 | 898  | ATGTGAGAGTTGTTCTGTGCTTAGCTGGAAGGATGATTACCCTATAAT           | 16217 | A_95_P180472 TA12752_4097 |
| 16810 | 198 | 65 | 577  | TTGCAGTCTGTCTTTTTGTTATCACACTCTGGAAGGCAAATAGTTTAGA          | 16227 | A_95_P048601 BP131958     |
| 16818 | 198 | 73 | 841  | GTTTTTGTGCTGGCTTAAAGTCTCATGGCTGTAAGAACTACATGAAATAG         | 16243 | A_95_P211112 TA19540_4097 |
| 16822 | 198 | 77 | 400  | GCACGTGGTCAGATCGAACTAGCAAAAATGTAAGACAGAGGCTGACATCT         | 16251 | A_95_P071500 BP525717     |

|       |     |    |      |                                                               |       |                           |
|-------|-----|----|------|---------------------------------------------------------------|-------|---------------------------|
| 16828 | 198 | 83 | 477  | AGGAAAGAAATCAAGTGCTTCTGGGTTTCTCAAATCTCCCTTCAGTCCTACCAGTGG     | 16263 | A_95_P100733 BP535500     |
| 16834 | 199 | 4  | 1047 | GCAAACCTCATGAATTTTTGCTTATATCCATCCCAAATGTTCAATTGAGGGACCAGTTTTI | 16274 | A_95_P016986 TA12618_4097 |
| 16839 | 199 | 9  | 0    | TTGAGGACTCAATCCCAGCCTATCATCCTGAGTGTCAAGAGCTATATCATGTCTAGAC    | 16284 | A_95_P310403 A_95_P310403 |
| 16840 | 199 | 10 | 727  | CTAACCTTAGCTTGGGGGATTAGGAGTTGTGTCCTATTTGCTATGTGCTTCTGTTGAG    | 16286 | A_95_P284363 FG133725     |
| 16841 | 199 | 11 | 458  | ATGTACAGATGAATTTGGCCATCGGAAAGAGCATAGGTGGAACCTTCCTATGGATGC     | 16288 | A_95_P045136 BP131060     |
| 16842 | 199 | 12 | 620  | AACCAAAAAGGAGCGCAAGTGAAGGATAAGTATCATCCAGGTTATTATATTGCAA/      | 16290 | A_95_P125722 EB424789     |
| 16844 | 199 | 14 | 448  | CGTCACGCATTCCGTACCAAGATTCATCATTGTACGCGTTTCCTTCCTTATTTTTCTT    | 16294 | A_95_P274253 TC69625      |
| 16845 | 199 | 15 | 137  | ATGGCTGTAGACATATCAAGAATAGTACTTGTGGTGAGTAAAGATTGTTGTTGCTGC     | 16296 | A_95_P217167 TA20870_4097 |
| 16848 | 199 | 18 | 583  | CCTATGTTTTGGAAGTGGTGGTTGTTTGGTTTCAAGTAATTGAAGAACTTACTTCCTT    | 16301 | A_95_P154137 TA11726_4097 |
| 16853 | 199 | 23 | 342  | CGTGTGACCGGATTTTGATAATAAAATGTGATAGTGTATTCTCAGATCTGGTCAAT      | 16311 | A_95_P091183 BP531246     |
| 16855 | 199 | 25 | 1275 | TTTTCTATCTGATGTATGGCAGCGGATTGGTTTAAACAACAATATTGGCGTTGTG       | 16314 | A_95_P002881 TA12047_4097 |
| 16856 | 199 | 26 | 640  | GTAAGTGTAGCGGGAAGTAGAATTGGAATAGTTTGTATACTAGTGTATCATTTTTCAC/   | 16316 | A_95_P134337 EB435329     |
| 16861 | 199 | 31 | 811  | CTTCCTGTGCCGTTATGCTAGGTGTCTTGTCTTACTTATTAACCTCGGCTATTGCTCGA/  | 16326 | A_95_P145547 EB449289     |
| 16862 | 199 | 32 | 203  | GCTACACCTGCTAATTGGCTTGAAGTTCAGAGGCATGAAATAATATAAATTTTAGA`     | 16328 | A_95_P158847 EH616737     |
| 16864 | 199 | 34 | 639  | AGGATTCTGAGCTCCCAGTAAACCTATGATTGATGACATGAAAGAGCAAATATTTCCG`   | 16332 | A_95_P223242 DW002575     |
| 16875 | 199 | 45 | 657  | TTGTGACACCAGATCAGTTTGGGGTATGTAGTTTCTAGGTATTGTTGACTTCCGCATG    | 16354 | A_95_P265266 BP530311     |
| 16880 | 199 | 50 | 1256 | GCTGATTTCAATCGCCTTTGATTTGGCAGTGGTGTACAAACAAAACAATGTTATTCT     | 16364 | A_95_P179632 X95933       |
| 16885 | 199 | 55 | 798  | AGCGTGACTAATTAGCCACAGGATAGTCTGTTTCAGTTAGAAATGTATGTTTCGCTATC   | 16374 | A_95_P145212 Y16644       |
| 16887 | 199 | 57 | 1251 | TAGTGGGGATTTAATTGTAATGTCAAGACTGATTAGCAAATTCCTACAAGTCCACTTA    | 16378 | A_95_P010106 TA15152_4097 |
| 16888 | 199 | 58 | 755  | CCACATGGTGATTCTGTTCTTTGATTTCTCGACTTCATTTATTCGCAAGGACATTTTAT   | 16380 | A_95_P119297 DV162399     |
| 16890 | 199 | 60 | 704  | TACCATGAGTGGCTAAAACCCATAGTTTTGGGGTTATGATTTAGCCATGAATATTGTT    | 16384 | A_95_P130882 EB431005     |
| 16891 | 199 | 61 | 1315 | CGCAAGAACAATAGTTGTGATTTGTTGCAAATGCATTTTCGGTTGGTGTGTTTGTAA     | 16386 | A_95_P007581 TA14073_4097 |
| 16893 | 199 | 63 | 365  | AATTGAAATACCAGGACATCAATAATCCTGATGTTTGGATAGCTGGTCCCTCCTATAT    | 16390 | A_95_P042861 BP130466     |
| 16895 | 199 | 65 | 503  | AACCAACTATATCGGTTTGGACTGGTTTGGTTTGTCCGATTTTTGGATTTTCGGAT      | 16394 | A_95_P036338 BP128705     |
| 16896 | 199 | 66 | 777  | TACAAAATGGATGAACATGACCCCGATTCCGGCCTACTTGGCATTGCAGTTCTCGAAG`   | 16396 | A_95_P250082 DV162343     |
| 16897 | 199 | 67 | 796  | GCTAAAAGACTCAGTCACCCGAGTCATCGTTACAAGAGCAGACGATGATATGAAGC/     | 16398 | A_95_P196442 TA16340_4097 |
| 16898 | 199 | 68 | 458  | CCCTAGATGTGCCTGTTACCTAAAGAAAAATATGTTATTAATGGCCTTTTGTATGTG/    | 16400 | A_95_P087158 BP529725     |
| 16909 | 199 | 79 | 321  | AAACAGGGGAAAGCGAAGATTGCTGCGGGTGCATTGTTGCCTCATCAGATAATCTTT     | 16422 | A_95_P067045 BP136757     |
| 16913 | 199 | 83 | 736  | GTATAGTATATAAGCTTGGGGTGAAAAATTCGTAGGCAACAGGCTCTAGGTCAGGC/     | 16430 | A_95_P303363 FG171806     |
| 16925 | 200 | 10 | 580  | TAACCTTCCATTAGTTGCAAGTGGAAAGACCTCTAGTCTTCTCAAACCATGTTATGA     | 16287 | A_95_P001176 EB432436     |
| 16926 | 200 | 11 | 1069 | TGTGATTGTGACCTGAAGGGATCACGACTATAATCGTTTATAATAACAAAGACTTTC     | 16289 | A_95_P007591 S44869       |
| 16927 | 200 | 12 | 622  | CTGGAATTAAGTGAATTTAGATTTACAGTCTACAATTGCATACCTGTTAACTCTTGC/    | 16291 | A_95_P006256 AF154644     |
| 16929 | 200 | 14 | 742  | CAAGTTGTTGTGGATAAATGATTATACTGTGCTCTTCGTAACATAGGATGCATTTGT     | 16295 | A_95_P177897 TA12099_4097 |
| 16935 | 200 | 20 | 316  | CCCGAATAGAGTAAACGTAGAACAAAAATGGTCTGGAAAGCATCGTCCAAACAG/       | 16306 | A_95_P196542 TA16361_4097 |

|       |     |    |      |                                                               |       |                           |
|-------|-----|----|------|---------------------------------------------------------------|-------|---------------------------|
| 16936 | 200 | 21 | 679  | TGGATGATCACGTTCTTGATGTACTGGAGGGTAATGCCAGCACCTTTAGCAATATGA     | 16308 | A_95_P237579 FG195217     |
| 16937 | 200 | 22 | 663  | GAGATGAACATAGTTATGGCGGAACCTGCATCTTTTCATTTTATCAAGTTTCTGTACC/   | 16310 | A_95_P116132 DV158708     |
| 16940 | 200 | 25 | 695  | CTTCATTTGAGAACAAATTCAAAGAAAGAACGGGCTGCCTGGATAGAAGCTCTGATA     | 16315 | A_95_P287153 FG186420     |
| 16946 | 200 | 31 | 1261 | TTCAGTGTATGCATGGTTGAATATCATCTGGAATGATCCTCGGATTGATGTATCTGGA    | 16327 | A_95_P017141 TA15454_4097 |
| 16954 | 200 | 39 | 795  | TGGTTAAACCACAAAGCATCTGTCTCTTGCCTCCTGCACTCATGTGCATTACATCA/     | 16343 | A_95_P225012 EB450071     |
| 16956 | 200 | 41 | 865  | TTAAGTAGGAGTCTTTCTCCCTTTTGATATTTTCACTTCACTGGGTTTCTGGTCAAA     | 16347 | A_95_P189212 EB428320     |
| 16957 | 200 | 42 | 780  | GGGTGGCCTCAGCTAAAGCAAATCTTGATTTTGGATCGAAACTGGCTATTATAATTT/    | 16349 | A_95_P021846 DV162505     |
| 16958 | 200 | 43 | 743  | GAGTTTAAATCTCAGCATTGGCAGTAAATTTGTTGATGTTATGCAAGCTAATCCGGA     | 16351 | A_95_P219857 TA21485_4097 |
| 16960 | 200 | 45 | 249  | ATTCCTGTCTATGGTCTTCGGCATTACCCCTTAACAGAGCTATGTTAGCTGTTTCACTC   | 16355 | A_95_P144927 EB448482     |
| 16961 | 200 | 46 | 805  | TGCATTGCCTCTGCTTGAAACTCCAGAAAATGTTGATTATGATATCGCCAGAGACTTG    | 16357 | A_95_P150807 EB680929     |
| 16962 | 200 | 47 | 535  | AGTTTGGAACTCTTTGTGAAAAATGCTTATAATAACTGCCTCCTCTCATATTGCTTTAC   | 16359 | A_95_P026146 TA13077_4097 |
| 16965 | 200 | 50 | 1063 | TCATGTTTGTAGAATGTGGCATTACCAGTTTTTACACAGGCGGTCTGCTGTTGCGA/     | 16365 | A_95_P109592 TA15601_4097 |
| 16967 | 200 | 52 | 1842 | TATTAGAGTATGCGGTTCTGGACCTTGTGATATAGTTAGCTTGTGCTTTCTTCCAAAA    | 16369 | A_95_P251422 AF116915     |
| 16968 | 200 | 53 | 456  | TGTTTTGTGGTTTATTTCTATGTTTCGATGGGCTATCGCCCTTCTTTCTTGATTTTGC    | 16371 | A_95_P182782 TA13301_4097 |
| 16970 | 200 | 55 | 1217 | ACTTCTAGATGATGTTGGGATACCCTAATAAAATGCTTCAATGTGCTGTGCTTTCTGG    | 16375 | A_95_P020166 TA17814_4097 |
| 16973 | 200 | 58 | 1421 | CACTTCTCTGTGACAAGAGAATCTCCATGGTTGATAACTGAAATTAATAATGAA/       | 16381 | A_95_P003991 Z48976       |
| 16975 | 200 | 60 | 620  | TGTTGTGAAATCATTTCGGACCAAGAACTGGTCTATCAATTTTATAAGCTGAATAAGA/   | 16385 | A_95_P214347 TA20245_4097 |
| 16980 | 200 | 65 | 511  | AATTAATAATAGAGCTAAGCTGAGGTTTGAAGCTGAGTCGAGGCGTTCGGTTTCGAAC    | 16395 | A_95_P036433 BP128730     |
| 16983 | 200 | 68 | 568  | AGGGTGATCTTATCGATGACTGTAATTGGGTGTTGAACTGTTAAGCAATTTGAGA/      | 16401 | A_95_P258866 FG640166     |
| 16986 | 200 | 71 | 255  | GTATGCTTCAAGATTCAATTTTCTGATTGTAAGAATATTTCTCATCAAGTACGACTC     | 16407 | A_95_P141907 EB445519     |
| 16995 | 200 | 80 | 230  | ACTTCTTGTTCGATGTAATATGTTTGAAGTGTGCAACACTTAAGACGCAGGTTGTTG     | 16425 | A_95_P121202 DW001222     |
| 16996 | 200 | 81 | 386  | TGTGCTAGAGATAATAGCTTTTGTGAAAATGTGTCTGCCAATCAGAATTTGCAATG/     | 16427 | A_95_P132612 EB433169     |
| 16997 | 200 | 82 | 803  | GATTTTAATTTCTGAAACAACCTACTATCAGAGAAAAGTCAGCTGTGGCATTAAATGTC   | 16429 | A_95_P295478 FG132886     |
| 17002 | 201 | 2  | 828  | GATGTCTTTTCATTTGCTTTAATTTTACAAGAGATGATTGAAGGCTACCCACCTTTCCA   | 16438 | A_95_P025906 DV161181     |
| 17003 | 201 | 3  | 659  | TTGTCATATTTACCTCATGCTTCGGGAAGATTGTGCGGCACCATTTGTCGTCTCACTCCTT | 16440 | A_95_P208837 TA19057_4097 |
| 17006 | 201 | 6  | 987  | TCTGTGTCCAACATAGTTCTCTTTTCTTTTGCAGAATCCTCCCTCTGTAGACTTGCAAG   | 16446 | A_95_P008686 TA12105_4097 |
| 17013 | 201 | 13 | 182  | CTATTTCTGTGCTTGTTAAACTGTGTTCACTGCTTCTACGGTGGAAATATAATCATTGCG/ | 16459 | A_95_P100363 BP535339     |
| 17014 | 201 | 14 | 874  | CTGACCGTCGTGGTGGAAATTGTATACCATGTACATTTGTTTATAGTTGTACAGTTTTT/  | 16461 | A_95_P227674 DV159197     |
| 17017 | 201 | 17 | 426  | AGCTACAGGAGGTACCAAAGAAATTTTATGTTAGATTTTCCCTCTGTAGAAAGCTCT     | 16467 | A_95_P091048 BP531192     |
| 17022 | 201 | 22 | 501  | ATGCCAGAACCAGAGCTTATCGATCATGCTGGTCTTGATTCTGCTGTCTATATACGGA    | 16477 | A_95_P073360 BP526196     |
| 17024 | 201 | 24 | 794  | ATGGCAAAAGGAGGAATGTTTCAGGCAAGATTACAACCATGTCCACCACCCCTATACT    | 16481 | A_95_P015931 DV158862     |
| 17028 | 201 | 28 | 90   | CATCTATGTGGTCGATTCAAGTGAATGCAAGTACTAAAGATGATGAAGAAGATGAG/     | 16489 | A_95_P034034 AJ718058     |
| 17030 | 201 | 30 | 762  | GGGAGTAAACTGATTGTGTTTTAGACCAAATGGAGGAGGAAAGAGGAGATAGTCG/      | 16493 | A_95_P016411 TC50620      |
| 17033 | 201 | 33 | 1567 | GGGCTACTTGCTTAAGTTCTGGTTTATTTATGCCTACTCTTTAATGTTGTTATTTTGA/   | 16499 | A_95_P160102 TA14230_4097 |

|       |     |    |      |                                                               |       |              |              |
|-------|-----|----|------|---------------------------------------------------------------|-------|--------------|--------------|
| 17034 | 201 | 34 | 731  | TTAAGGAAGGTTTGGCACCAATAAATTTGGTAGTTGAGACTGAAATGCACCGCGCAA     | 16501 | A_95_P151667 | EB682378     |
| 17035 | 201 | 35 | 374  | CCTAAAGCTCTGGGAACAACCTCAACATGTTTCATCTAACTGGCAAACCTTTGGAGTGTT  | 16503 | A_95_P041421 | BP130090     |
| 17037 | 201 | 37 | 174  | CCAACTATAGTTAATCTTCTTTTGCATATATGTATCTATAGCAGTTCCACCCTTGGC/    | 16507 | A_95_P164082 | EH623212     |
| 17038 | 201 | 38 | 559  | GCTTCTTCGTCATCATTGTCCTAAGATTATTCCTTAATCTTGATAAGTCTTAACTGGCA`  | 16509 | A_95_P017851 | TA17289_4097 |
| 17042 | 201 | 42 | 856  | GTATTCTCCTCTCCAGCATTGCCTCGATTATGAATGTGGTAACTGGTATTACATATC     | 16516 | A_95_P186797 | TA14204_4097 |
| 17045 | 201 | 45 | 841  | AATGTTTTGTGTAGAACCAAGAATCAGCATAGAAGCTAATGATTTGACATGTGAAGA     | 16522 | A_95_P216822 | TA20787_4097 |
| 17052 | 201 | 52 | 783  | CAAGCAAGGAAGGGCTTCCAGAGCCTCTAGCTTATCAAGTATTGATTCTATAATGA(     | 16536 | A_95_P138487 | EB442237     |
| 17053 | 201 | 53 | 853  | TTGATGCCGCAAGGGGACTCGAGTATTTGCATGAGAAGGTCCAACCTTCAATAATAC     | 16538 | A_95_P245052 | DV161386     |
| 17071 | 201 | 71 | 1633 | CTGTATGAATTGATCTCGGGTACTATGGCTTGCTAATAAACATGTACAATTCTTCTTCI   | 16574 | A_95_P208112 | TA18893_4097 |
| 17076 | 201 | 76 | 1014 | CGTGGAACAATGTTTCCCTTCTTGGTGAACACTTGTATGTTACTTAAATCTCTTGTTA    | 16584 | A_95_P195212 | X60060       |
| 17079 | 201 | 79 | 1406 | CCATTTCCGATGTAATGTTGATGATGGTAGTGAAGTTATTCCAATTTGTATAATGGC     | 16590 | A_95_P198937 | AJ488194     |
| 17082 | 201 | 82 | 1087 | CAACACAGTAACTTTATTGGTACTGAACATGGCATTAACTTTGCGATTAACGAACTAC    | 16596 | A_95_P030501 | TA17907_4097 |
| 17086 | 202 | 1  | 236  | TCCACTGTGCTGTGATTTTGA AAAAAGCATAACCCCTTCTATTGTCTCTTTTTACCATG` | 16437 | A_95_P197272 | TA16525_4097 |
| 17087 | 202 | 2  | 1972 | CAGAGATGCTGATGTCTCACATTTTATTGTGTTCTTCATGTCCGAGAAATGTAAAATA    | 16439 | A_95_P012966 | AF129003     |
| 17088 | 202 | 3  | 889  | TCCTGTTCTTGATGGAAAGACTTCCAGTTCAAGTGACAAAGAGTTCCTGTGAGGAG`     | 16441 | A_95_P184747 | TA13764_4097 |
| 17090 | 202 | 5  | 440  | TAGGCTATTATGAGTTCAAGACAGGCCGCTATGGTGA AATTGGTAGACACGCTGCTC    | 16445 | A_95_P065230 | BP136275     |
| 17097 | 202 | 12 | 41   | GGTGCCCTTTCATGGCTGCCAAAATCCAAAATCTTTTCTCCAAAAGAGCCTATCC`      | 16458 | A_95_P113287 | CV021096     |
| 17099 | 202 | 14 | 266  | ATTGTTTGAACCTTGGATCTTCTACCACGTGCCACGGTACCCTGATTAACGATAAAA     | 16462 | A_95_P209477 | TA19199_4097 |
| 17101 | 202 | 16 | 933  | GGTATGAACCTCCATAGATTTGTTTCAAGATAATGAATGTGCTAACGTAGAGATCAA`    | 16466 | A_95_P015781 | TA14437_4097 |
| 17103 | 202 | 18 | 155  | GACATGATGTCATCTGATCCATTGGATGCTGGTACACAAGCTCATCACTCGTCTTGA     | 16470 | A_95_P234374 | EH617354     |
| 17105 | 202 | 20 | 253  | TGATACCTTTGTGTTTCCCTGACAGAAGTATAAGTCAACAGTACAGCTGGAAAGCAA(    | 16474 | A_95_P038801 | BP129373     |
| 17110 | 202 | 25 | 770  | AAATACAGGAGCTTTGGCTACTCCATTGGTGCAGCAGCTGATTTGATGAGATGATTG     | 16484 | A_95_P228234 | FG158536     |
| 17119 | 202 | 34 | 859  | GAAAGCTGATACAGGAAGGAGATTTCTGATCCAAGCTTTTCTGATTCATTATCTTTAT    | 16502 | A_95_P229239 | DV162712     |
| 17121 | 202 | 36 | 457  | CAGGGAACGTAAACGTTACAATGCTCCATATTTTCATATTATGGTCCCTCCATATGAT/   | 16506 | A_95_P002481 | FG637164     |
| 17124 | 202 | 39 | 435  | GTATTAATGACTCTCCGGTCCCTTTTCTCATCTGTGAAATTTATTATGTTATCCAACC/   | 16511 | A_95_P257054 | EH621667     |
| 17127 | 202 | 42 | 469  | TTCACCCAGAGTGCCTAAGGACAGAGATATATAAGTAATTTAATTAAGAGGGGGG`      | 16517 | A_95_P113682 | CV021255     |
| 17129 | 202 | 44 | 711  | TTTTCTTCTCGAAATTCTCTGAGTCCTTAGCTGTGTTCTAAACCTTAGAGGCGGAC      | 16521 | A_95_P030646 | EB447172     |
| 17131 | 202 | 46 | 1095 | AATATTGGGGAGCCGATGATATTTCCCAACACTTGTCTAACAATGTAAGAATCTTGAC    | 16525 | A_95_P187502 | EB643439     |
| 17139 | 202 | 54 | 802  | TGTAGTGCATGGAGGTGAAAGTTATGGTGTGTTTTCAAGAATTGTGGTTGGTGGATT     | 16541 | A_95_P289703 | EB449854     |
| 17140 | 202 | 55 | 809  | CGACTAATAGGATATAGTGAAGATTGTCACGACTTGATTTTGCTTTTGTTCATTTGT,    | 16543 | A_95_P009586 | EB679346     |
| 17146 | 202 | 61 | 671  | TCAGAATGTTGGAGCCATCGGATGTTTATCAACAGAGTCAGATCTACTTCTACGCTCT    | 16555 | A_95_P301758 | FG643145     |
| 17148 | 202 | 63 | 563  | TCGCACATCTGGGATGGTTTGC GTTAGATGTTGGTTTTAGACTTATCATGTTTATTT    | 16559 | A_95_P159962 | EH618563     |
| 17152 | 202 | 67 | 477  | GCGTTGAGTCATCAGATGGTTTAAATCTATGAATTTGATTCTAGTTTGGCATTGTAC(    | 16567 | A_95_P261631 | BP132909     |
| 17156 | 202 | 71 | 126  | TAAGGTGCATGAGCACATTCAGGATTGTTTGTATCTGAGTAAAAGTTAACATTCTTC     | 16575 | A_95_P162227 | EH621119     |

|       |     |    |      |                                                             |       |                           |
|-------|-----|----|------|-------------------------------------------------------------|-------|---------------------------|
| 17163 | 202 | 78 | 1237 | ATTTGGCTAGAATAGGTGTGAAGTACTATGGAAC TATTCGGCAGGAGGAAGAACTT   | 16589 | A_95_P014011 TA16664_4097 |
| 17170 | 202 | 85 | 170  | TGGAGAAATCCACTACCTTTACCATCATT CAGGGTTGTTGCTCCCATGAAGAGCTT   | 16603 | A_95_P104667 TA11636_4097 |
| 17173 | 203 | 3  | 820  | AGGTTGTGACAGATGATCCTATCGATTTTATGGATCAGCCTCCAGCAGGTCTTGTTAT  | 16608 | A_95_P229944 EB441417     |
| 17174 | 203 | 4  | 544  | AATATAGTAGTACGGATGATGTGCTATGTTGATCTTATTAAGTGTGGTGGATGGAGC   | 16610 | A_95_P105357 CV017422     |
| 17185 | 203 | 15 | 809  | AATTTGAAGATTTTTCCCGAAACTCTTGAAGCAGTCAAGATGGGGGTGGTGGTTTTG   | 16632 | A_95_P010016 TA12680_4097 |
| 17188 | 203 | 18 | 757  | ATTCCAGCCTGGTTTTCTTCAGTTCTAAAGATGGTACCAATGTAGTCAGTGGGGATT   | 16638 | A_95_P269891 TA21000_4097 |
| 17191 | 203 | 21 | 764  | TACTACTAAATGCTCGGATATCCTTGCTCTTACTTGATCAACTGAAGTGGAAATGGCT  | 16644 | A_95_P195347 EH617306     |
| 17192 | 203 | 22 | 488  | AGCTTAGCAAGCAAAGTAGGATACGGCCTGATATTTTTGATTGATCATACAAGTCTG   | 16646 | A_95_P276853 AM802729     |
| 17195 | 203 | 25 | 680  | GATGAGCTCCCAAGATGGTTTTGCCATCATTACTTTTAAATTCTGGTACATTGATAGT  | 16652 | A_95_P014311 DV160945     |
| 17201 | 203 | 31 | 1361 | ATTGCCGCTTCATTGTATGATCCTCCACGTTCTCATTAACTCCAGAAGTTTACAGTTG  | 16664 | A_95_P016776 TA12497_4097 |
| 17202 | 203 | 32 | 843  | GACCTAAGTGGACAGCAAGGCTTTTCTATGCAATAGTAGCTGTGCTTGTTGTTTTGCT  | 16666 | A_95_P289113 DV157663     |
| 17203 | 203 | 33 | 1565 | CGTACTGTTTGTACTGAACCTTACTAGGCGATTTGGGTATTGAATATGTA AAA      | 16668 | A_95_P259721 DQ229077     |
| 17204 | 203 | 34 | 535  | GGACTAGACTTGCTCAATTATTAATGTGT CAGTCCTTGTTCTACTTGTTAACTCTTGA | 16670 | A_95_P206757 TA18588_4097 |
| 17208 | 203 | 38 | 680  | GTGATCTGCAAGCAAGGTTAGACAATTTGAGGAAAATGTAAATTGCTTACAGATTGA   | 16678 | A_95_P248172 FG190544     |
| 17209 | 203 | 39 | 810  | AATGCATATGGTTTCTATACCATCATCGGAGACGAGTGATCTGGAACATGCTTGTC    | 16680 | A_95_P117492 DV160414     |
| 17210 | 203 | 40 | 726  | GGTCTCTTCTGGTTAACCTTACCATGTACAGATGACTCTTGCTCTTATCCAATAGC    | 16682 | A_95_P216027 TA20615_4097 |
| 17211 | 203 | 41 | 866  | CCAGGACAAAGATAAATTGATAACTA ACTTGAAGACTATACAGGACTATCTCTGTTCC | 16684 | A_95_P148577 EB677938     |
| 17215 | 203 | 45 | 743  | GGTAGGGATTGGAGAGCAATACATTTGGTTGATTAAGTAGCTTGAGTTTGATTTTGA   | 16692 | A_95_P164257 EH623394     |
| 17217 | 203 | 47 | 512  | ACCTTTTGTCTTTCTTGTTGTGCTTTTGATAGAAGAAAACACCATGCAAATTGTTTC   | 16696 | A_95_P022651 DW001744     |
| 17218 | 203 | 48 | 336  | GTTCTCTTATGTTTTCAAACCTGGCCCTGTAAAGTAGTGGTACAATATAGTAATTCAA  | 16698 | A_95_P096993 BP533846     |
| 17225 | 203 | 55 | 80   | CCACGACAGAAATAAACTGTAGTTTCGTTAATGTTCTTGTAGTGTAGTTTCTCCCAA   | 16711 | A_95_P147482 EB451925     |
| 17228 | 203 | 58 | 556  | TAGTGGAGCTAGATTTTAGTATTTTCAGTTTCTCTGCAAGCCTATTTATAGGCAGTTCT | 16717 | A_95_P124037 DW003888     |
| 17229 | 203 | 59 | 793  | ATCCAATGCCTTAACTTATTGAAGTCCTAAGTGAGGACATTTGTGCTTGAAAGCAATA  | 16719 | A_95_P011146 TA12856_4097 |
| 17233 | 203 | 63 | 571  | GCTATCTTGAGTTTACTTTGTGAAC TACTATTAAGTAGGGCATTGTACTGGAATTTG  | 16727 | A_95_P000801 EH619079     |
| 17234 | 203 | 64 | 937  | CATCCAATTACAATAATATGAGCGAATGAATGTCGGATATATGCATCATTATGGACG   | 16729 | A_95_P185337 TA13889_4097 |
| 17236 | 203 | 66 | 410  | ATAATGTTGTTGCTGGTGCTGCTTG TGATGCTGATCTTGACAGTCTCGTAGCTGATGA | 16733 | A_95_P051881 BP132772     |
| 17238 | 203 | 68 | 790  | ACATATGTAGGCCACGTTTCTACCATTGTTCTTCTTCCATTGGTCTTTTTGTTGTAA   | 16737 | A_95_P010311 DV999353     |
| 17239 | 203 | 69 | 709  | GTTCAATTTTGTATGCCGTTGATGGTTTTGTTTGATATGCATTTTGTGTTGTTGCT    | 16739 | A_95_P014626 DV158478     |
| 17240 | 203 | 70 | 644  | GGACTAGCGTTCTGATAATCTGATCTAGACGACTTGATCTTTGAGGAATTAATAA     | 16741 | A_95_P051321 BP132614     |
| 17243 | 203 | 73 | 828  | GCACTTTCTTACCTTTCTGATGTACCACGACAAATTCAGCGTCATGAGCAGTGTGTC   | 16746 | A_95_P289928 FG141437     |
| 17247 | 203 | 77 | 267  | TGGGGGTTAGATTTGTGGAGTTAGGTTTGTCTTTTGTGCGTTTGTGGATTAGAAT     | 16753 | A_95_P152122 EB682425     |
| 17248 | 203 | 78 | 272  | CTGTCTTTTAAATGTTTCGGGCGGTGAAAATATGGTCTGTCTATGGAATAAAGTTGT   | 16755 | A_95_P089228 BP530413     |
| 17253 | 203 | 83 | 466  | GAATAAAGAAATAAATTAGGGGTGCTCGGGTATTGGTTGGGGGAATCCGTCTCTATC   | 16765 | A_95_P087793 BP529880     |
| 17255 | 203 | 85 | 388  | CCGCAAGGTATAGTAGAATGAACTCGGTGGAAAAGGCTATAGAGAAAGTAGAACTC    | 16769 | A_95_P096103 BP533476     |



|       |     |    |      |                                                               |       |              |              |
|-------|-----|----|------|---------------------------------------------------------------|-------|--------------|--------------|
| 17257 | 204 | 2  | 882  | TAAAATCAACCAAGCTGTTTTCCCGGACTTCAGGGGGTCCCCATAATCACACAATT      | 16607 | A_95_P278078 | EB427822     |
| 17258 | 204 | 3  | 583  | ATTCGGAAAATTCAGACAAATCCAAAATCTTACCTTTCACATAACAGCCTCACTGGC     | 16609 | A_95_P102127 | EB425603     |
| 17259 | 204 | 4  | 392  | GAAACACATTGCTTTTTGACCCCGCTTACATTAATATGAACCATTTTCGTGTCAAATC    | 16611 | A_95_P187297 | TA14313_4097 |
| 17266 | 204 | 11 | 528  | CTATGCTCCTGAATCTTCTCTAGGGGATTGAAACTTTTGTCTATATCCTTTTGTCC      | 16625 | A_95_P022541 | TA18459_4097 |
| 17274 | 204 | 19 | 812  | CCATACTCTTCGGAGCTAGTATATATTTTGGTTTCTACAATCTTAAATCTGCTCCTCT/   | 16641 | A_95_P147157 | EB451395     |
| 17278 | 204 | 23 | 282  | TACTGGAGCAGCTTCGAGTCATCAGTATGCTCATGACGGAECTCTGAATCTTGTGCA/    | 16649 | A_95_P168131 | EH664357     |
| 17279 | 204 | 24 | 693  | TAGCTGAGACAGAATAGTGTCCGATTTTCATGTGTGAAATGCTTCTTTATTTAGCTG.    | 16651 | A_95_P027231 | EB438892     |
| 17283 | 204 | 28 | 803  | AGGATAAAGAGAAAAAGAGAGATAAAGGTGGTCATCATGATTCTGGTGCTGATCAT      | 16659 | A_95_P248017 | EB426879     |
| 17286 | 204 | 31 | 767  | TTTTCAATGCTTGGCCAGCTGGTGATGGCTCCATTGTAGTTGGATCACTTGATGGG      | 16665 | A_95_P202382 | FG144026     |
| 17294 | 204 | 39 | 801  | GAACCAAGTCTTTTATCTTTCCTTCTCCGAGATTATATCTTTATGCAAGAACTTT       | 16681 | A_95_P248677 | EB451516     |
| 17295 | 204 | 40 | 454  | GCGTATGCGTGGCATGATGTTTGTAGTCTGTGCATTATTACTTTAACATAAAATTTAA    | 16683 | A_95_P022146 | EB430490     |
| 17304 | 204 | 49 | 128  | GATTTGCCTGATACTCAAACAGTTTCTTAACTTAATCAACACGATTTTCTAGTGC       | 16700 | A_95_P103657 | CV016628     |
| 17307 | 204 | 52 | 665  | AATCTTTTGTGGTGGGTCTCAATGGGGCTCTTGATATTGAGGACTGAGTGTCCAAG      | 16706 | A_95_P210592 | TA19429_4097 |
| 17312 | 204 | 57 | 0    | GCATTCCAGTCAAACCAAGCTTGAATACAAAATTCGCTTGAAGGCTTCAATTGAGGT     | 16716 | A_95_P264156 | A_95_P264156 |
| 17321 | 204 | 66 | 615  | TGTTTCTCCTTGCTTGGATTCAAGGTGAATGAGATCAATATGGTTTTGTTAGGTTCT     | 16734 | A_95_P300333 | FG639683     |
| 17325 | 204 | 70 | 461  | GCTGGAATGTAGACCAAATCCCGATATGTACTTTGAGTTATCTAAGAGTAAATAGTT     | 16742 | A_95_P140092 | EB444052     |
| 17333 | 204 | 78 | 702  | TTGATCGGGAGTAATTTATCTTCGAGAAATGTTGAGCGCCTCTGCAATTTTAGCTATA    | 16756 | A_95_P259896 | TA14213_4097 |
| 17341 | 205 | 1  | 212  | AATAATCTTCTGCCTTGGAGAAGAATACTAGAGGCCACTGGAATCAGGCAGTACA       | 16771 | A_95_P068735 | BP137202     |
| 17343 | 205 | 3  | 863  | CAGATGTCATGGAAGAGAAATGTAATTCTGCTGCAATCTGCTTGTTCATTCTGCC       | 16775 | A_95_P008926 | DV161279     |
| 17346 | 205 | 6  | 449  | ATGGCCTATCCGATCACTTGCTTAACACATTGATTTTTCTGTTCTGGGGAATTTCTTT    | 16781 | A_95_P002001 | BP135342     |
| 17347 | 205 | 7  | 877  | TGAGACTTGTCTGTTCAACAGTATCCCTTCACAAACAACCAAGCTATACCTCCAATG     | 16783 | A_95_P116467 | TA16664_4097 |
| 17349 | 205 | 9  | 675  | GTAGAGCTTTTTCCGCACCAGAAGTTTTGTTTGGATTAACTTTTGAATGACAAATCT     | 16787 | A_95_P178657 | TA12305_4097 |
| 17352 | 205 | 12 | 412  | GTGACCATGACATGTTTTCCGGAACATTATGAACAAAGAAGCTTCTGTATTTATCAAT    | 16793 | A_95_P121917 | DW002000     |
| 17353 | 205 | 13 | 708  | GGTAATTTAGACGAGCTGACTTGATAGCTCGAACGGCTTATGTATCTGTATTTGGTC     | 16795 | A_95_P017601 | TA12651_4097 |
| 17361 | 205 | 21 | 487  | ACTGTCCAAGTCAAAAAGCAGAGATAGCTGGGACCGTACTTGTTTGTTTTAGTG/       | 16811 | A_95_P123712 | DW003582     |
| 17364 | 205 | 24 | 562  | GATTCAGAAGCTGGGTTTAGCTTCATTTGGTTATTTGTTGTTGTTTCATCAGGCAATA/   | 16817 | A_95_P160387 | EH619086     |
| 17368 | 205 | 28 | 3831 | GTCCTGAGCTTGTCTGAGCTTATTGTAATAAGAACACAGTTCTCATGTTTAATAC       | 16824 | A_95_P033181 | AJ302018     |
| 17369 | 205 | 29 | 859  | TTAATACAGAAGCTGGAATCTTGAGGTTATGGGGGCTCCACTCTCTGGAACAGACT      | 16826 | A_95_P273331 | EB428953     |
| 17373 | 205 | 33 | 742  | ATGAGTTGTTGCGTAGAGATTGTTTTGTTTTTCAGCATCATGTTATGTGGGCTAGGCA    | 16834 | A_95_P302758 | FG182677     |
| 17380 | 205 | 40 | 830  | TTTGGCCAAATTCGGAGTCCAGTCCCTCTCCTTCTCCTCTTACTTATAGATAAATCTAACT | 16847 | A_95_P130572 | EB430626     |
| 17382 | 205 | 42 | 573  | CAGATCTATAGCCTAAATTATGGAGCACGTAAACTAATGGTCCCTCCGCTAAATTAAP    | 16851 | A_95_P304578 | FG636318     |
| 17390 | 205 | 50 | 756  | CTTCATGTGCTTAAATTAATCTATATCCAAAGGAGTACAAAGAACCAGTTAGCCATT     | 16867 | A_95_P021971 | DV160358     |
| 17392 | 205 | 52 | 687  | GTTTCAAGCTCGCAATGAGTTTGAATCTCCTGACACTGGAGTTGCCGATCCTTACT      | 16871 | A_95_P162082 | EH620847     |
| 17394 | 205 | 54 | 475  | TGTTACAGCATGTTTTGCTGACATAACTAATTATAAACCCAAATTTCCCTGCTCCA      | 16875 | A_95_P027081 | BP132176     |

|       |     |    |      |                                                            |       |              |              |
|-------|-----|----|------|------------------------------------------------------------|-------|--------------|--------------|
| 17395 | 205 | 55 | 811  | CCTACGGGCAAATTCAAGCTAAAGAAGTTTGAATAGATTCAATAGCAGAAAATGAAC  | 16877 | A_95_P009946 | EB679273     |
| 17397 | 205 | 57 | 608  | CACACTTAGGTCTTGAAGATTTGAAGCTTTTGGTTGAGAATTGCTTACTCATTATGC  | 16881 | A_95_P027566 | EB681194     |
| 17402 | 205 | 62 | 642  | GGGCTGCATGTTCAACTTTAGGATGATGACATACTGTACAGTTTCTTCAGGATAATA  | 16891 | A_95_P067865 | BP136984     |
| 17403 | 205 | 63 | 409  | ATCGAACTTGATAGAGGCATTCAAACACTGTACCAATAAACTGATTACTGGGTAAGA  | 16893 | A_95_P197122 | TA16494_4097 |
| 17404 | 205 | 64 | 783  | TGATATCGATATCTCAGATCATTGGGGAGCAGACCATCTGTCTGAGATGAGCTGAGA  | 16895 | A_95_P253379 | FG161776     |
| 17408 | 205 | 68 | 876  | GGTTTCTGTATTCAATTTAAGGGCAGTTGCTTTTTCTCTGAAGAATCTAGAACTAC   | 16903 | A_95_P216967 | EB678001     |
| 17410 | 205 | 70 | 181  | ATGTAATTTTACTCGTTCAGACCATCCTTTAAGGTAAGGAACATCAATAGTTGTGAT  | 16907 | A_95_P149902 | EB679891     |
| 17416 | 205 | 76 | 322  | CAGGAGACAGGGAGATTAGAGAGATAGCATTGATTATATTGAAATGAATCTTCAT    | 16919 | A_95_P102642 | TA12506_4097 |
| 17418 | 205 | 78 | 594  | TGGCAGTACTCTCGTACCTTTGTAGGCACTCTTGTTTTGAAGTATTCAAGTTATTAAC | 16923 | A_95_P205742 | TA18355_4097 |
| 17419 | 205 | 79 | 957  | AGGATCCTCGTGAGGTTGCTGCTGCTAAAGCAGATTTGAATTATATTGGCTTGGATG  | 16925 | A_95_P184572 | TA13724_4097 |
| 17420 | 205 | 80 | 418  | TTGGTCGGTAGCATGTATCCTCTTGTTCAAGTTCCTGTATAGAAATCTGAGTTCAATG | 16927 | A_95_P026921 | TA20171_4097 |
| 17422 | 205 | 82 | 832  | TTGCTGATATCAAACCTCAAATGTGCTGCATAGTTATGGTGGCGATATTGTTCTGCTT | 16931 | A_95_P117377 | DV160284     |
| 17428 | 206 | 3  | 975  | TGAGGGGTGATGATGATAATGAAGGGGGCAAGGATCACAAGCTTTCTGGTAAAACC   | 16776 | A_95_P238989 | AF154643     |
| 17431 | 206 | 6  | 545  | TTGGAGATGGCGGACCATTTGGCTGGTTGAATCATTTATGCTTTAGAATTTGGCTTTA | 16782 | A_95_P258056 | TC58159      |
| 17438 | 206 | 13 | 62   | CCCTTTGCACTTTGGGGCGGACAGTTCCAATTCTGTAATGCATATTTGCCTCAAAA   | 16796 | A_95_P102212 | CV015925     |
| 17440 | 206 | 15 | 772  | CCCTCCCTCTGTTTCGTAGATTATTTGTGTTGTTTTGTGTTTGAATGGTCTCTATTG  | 16800 | A_95_P221907 | EB429111     |
| 17441 | 206 | 16 | 881  | AATCTCCCTCTCCAGAGCGCATTGTTGTTTATACATATGCATTGGTTGGGATCAAGC  | 16802 | A_95_P207127 | DW001038     |
| 17444 | 206 | 19 | 354  | GTCTTCGAAGGTTTACAGTTGGTTTTATCCAAGGTCATGGGAAATTGTTTACAATG   | 16808 | A_95_P080770 | BP528090     |
| 17454 | 206 | 29 | 343  | AGAAGCGTTGCTCTCTGTGCTTCTGAAAACATAGAAAAGGCTGATTTTCTGTTCA    | 16827 | A_95_P156002 | EG650363     |
| 17455 | 206 | 30 | 656  | GACTACCTTGTATCTATATATCTGTTACTTACCAACGTTAGCTGTAGTTGCCACCAT  | 16829 | A_95_P234919 | FG638862     |
| 17457 | 206 | 32 | 221  | CTTGGAGAAAAGCAGAGAAGAAGATTTGAGGATGATGGTACTTCTACAAAGA       | 16833 | A_95_P140042 | EB443985     |
| 17458 | 206 | 33 | 551  | GAGAGATGATTAATTTGATGTCATCTAAATTGTAAGGAGTACGCTTATTCGGTCATC  | 16835 | A_95_P120167 | DV999916     |
| 17462 | 206 | 37 | 485  | TCTTGACTATTCAGAGTTCTGCATATTCAGAGTACCTGCAGTAATCTCAATCGATTCC | 16842 | A_95_P056596 | BP134001     |
| 17464 | 206 | 39 | 934  | GCCAGAAGTAAAACGTATACAGCGGCTCCTTTTGAACCTTATGTTATTGTTTATTAC  | 16846 | A_95_P217422 | DW000754     |
| 17465 | 206 | 40 | 1313 | GATGTATGGAAGAAGCATCCTGTTTGAAGAACTCTTCAAGAATGAATGATCAATC    | 16848 | A_95_P223472 | TA22258_4097 |
| 17466 | 206 | 41 | 249  | CCTGAAACATACTCCATGATGCTTGGTCAATAACACTTTGATGCTCATTCTTATTCTT | 16850 | A_95_P105892 | CV017661     |
| 17469 | 206 | 44 | 690  | TAGCAGGTTTCTTGTCACCTTTAGCAAGTGGAAATATGTTTAAATCATCTTGATTTTC | 16856 | A_95_P003691 | EB679961     |
| 17471 | 206 | 46 | 267  | GTATCCAAATAGAAGCGTTTCATGTCTTCAAGCTATTTGCCGCAAATCACAATAAGCC | 16860 | A_95_P030838 | TA20626_4097 |
| 17473 | 206 | 48 | 493  | CTGGTTACTGAGAGTAAGTATGATGATGGCCGTGATGCTAAAATCAAGAAGTCACA   | 16864 | A_95_P153302 | EB683590     |
| 17474 | 206 | 49 | 261  | CTCGAACTGAGAAAAAAGTTAGTTAATAAGCTATTGTTTCTTGAGAGTGCTGCTTGT  | 16866 | A_95_P028021 | TA15160_4097 |
| 17476 | 206 | 51 | 858  | AACGAGCATTATGCGGAGCAAGAAGCTAATGAAGCTTACAACAGATTGATAAA      | 16870 | A_95_P145427 | EB449178     |
| 17479 | 206 | 54 | 807  | TGATTTTGTCTCAAAAATCTCTCCTTTGTGTCGATTTAGCGACGAGATCCGGGATC   | 16876 | A_95_P239464 | FG152875     |
| 17480 | 206 | 55 | 346  | AGAAGATCAGAAGGGTGGATCCAACCTCTGGACATGGAAGCAGATGAAGGTGATGA   | 16878 | A_95_P155842 | EG650290     |
| 17483 | 206 | 58 | 792  | ATCAATTTAGGGAAGTTGTTAGGCAAAGGAGGAGCAGGTGGCGGTCAGTTTTGAGA   | 16884 | A_95_P145092 | EB448633     |

|       |     |    |      |                                                              |       |                           |
|-------|-----|----|------|--------------------------------------------------------------|-------|---------------------------|
| 17490 | 206 | 65 | 876  | TGGAGAAGAAGGTTGAAGAAATTGATTCATCACTGGTAACTGCTATACCTGGAGTTC    | 16898 | A_95_P124492 DW004310     |
| 17491 | 206 | 66 | 620  | GTTCTTTTATATTTTCTACTGTATAACTTAATGACCCAGACTCTCACAGTAGCCTAG,   | 16900 | A_95_P223002 TA22152_4097 |
| 17493 | 206 | 68 | 770  | CTTGATTACACAGCTACAAAGGGTGAATAGTTGCATTTACTAGAGGACTTGCTCTTC    | 16904 | A_95_P148402 EB677708     |
| 17495 | 206 | 70 | 831  | GCAGTGAACAAATGAAGTATTTGTGTACCATAAGGCGATCTCCAAACCTGTTACTTC    | 16908 | A_95_P269946 EB428076     |
| 17496 | 206 | 71 | 543  | TAGCTGTCTTGAGTTACTACTTTCTTGAACAACATTTTTAATCTAGGCATATTGCACC   | 16910 | A_95_P002191 TA14971_4097 |
| 17497 | 206 | 72 | 974  | GGCATTGCAACAAGTTCGTGTTAGTTGTAATGCTATTAGATCTGAGCATTTTTTCATT(  | 16912 | A_95_P018311 TA14739_4097 |
| 17498 | 206 | 73 | 0    | ATAGTCGGTACGATTAACATGGGGCACATCACAGTTGTGAGAGGAAGGAACAATAT     | 16914 | A_95_P263621 A_95_P263621 |
| 17501 | 206 | 76 | 290  | TATAGTATAGCTGTCGCTGATATTTGATTCTGGAAGAGGAGAGCTAAAATCTTCAAC(   | 16920 | A_95_P090683 BP531059     |
| 17502 | 206 | 77 | 446  | ATGTGTAACAGGAGATGTGATGAGCTAAATGTAGGGCTCAAAAAGTTTCTTTTGACC    | 16922 | A_95_P067835 BP136976     |
| 17504 | 206 | 79 | 601  | TTTCTATTGTCTTGTTGTGACAAGATGTAATGAATTTGAGTGGTATTGTGTTTGCA(    | 16926 | A_95_P000881 TA13413_4097 |
| 17506 | 206 | 81 | 233  | GGTTGAGGGAAGTATTTGTGCTTTTATCCTTCATTTTTGTTTAGAGAAGCACCATGTA.  | 16930 | A_95_P142862 EB446271     |
| 17508 | 206 | 83 | 575  | AGGATTGATTATACAGAGGTGGAAATATGGTGCTACTGAAATTATGTGGTATATCTT.   | 16934 | A_95_P244372 FG643880     |
| 17511 | 207 | 1  | 745  | ACGGCATCCAAAAGGATGTGTCACGGATACTATCGTTTCATGAATGCAGTGAAATCTG   | 16939 | A_95_P146947 EB451123     |
| 17516 | 207 | 6  | 578  | TAAGCCTGATTAGTCCAACAAGAGTTTGCTCTCAACTGCAGAGTTTGACAACCTGATAI  | 16948 | A_95_P117757 DV160704     |
| 17517 | 207 | 7  | 1382 | TGTA AAAATTTTGGTGACCAGTTGTCAGAGCAGTTAGATCGTGATGGTGGACTCCCG'  | 16950 | A_95_P214862 TA20355_4097 |
| 17520 | 207 | 10 | 787  | GTACAGTTGACTTTGTAACCGTTAATTTTGTGTCGTACGAGTGTAAGCTTATATTI     | 16956 | A_95_P213902 DW003088     |
| 17521 | 207 | 11 | 657  | TTTAATGTAGCTTAATTTTATAACAGGCTGGTGCATCGAATGATGAAGGGTCCCTCAI   | 16958 | A_95_P049361 BP132144     |
| 17522 | 207 | 12 | 405  | AGAAGACCGCTGCTTAAGAACTTTCTGATTAGTGAATTGATATATAGGATTTATGG/    | 16960 | A_95_P002311 BP534280     |
| 17523 | 207 | 13 | 798  | AGAAGTACTTGAATGTCAGTGAGGAGCTGTTATTTAAAAGTTTCTTTAGCTTACCAT    | 16962 | A_95_P272666 EB452029     |
| 17525 | 207 | 15 | 700  | TCACAGTTGTACAGTGTAGTGCTTTTGAATGGCTCGTTGGTCTTCATTAATTGTACA(   | 16966 | A_95_P272786 EB678213     |
| 17526 | 207 | 16 | 283  | TAGACTTGAACCTTTGGATGAATTGTACCCTATGTCACCTGTCCTGAATTCCCTTTTCA' | 16968 | A_95_P164072 FG199807     |
| 17530 | 207 | 20 | 871  | AATGCCCTGCTACTATATTAGTTGTTGGAATTTCTGGCACTTTGATTAGTTTTTCCATC' | 16976 | A_95_P031271 DV999667     |
| 17535 | 207 | 25 | 359  | GTTAGTTTGAAGTTGTATAGTAATTTATTTAGTGTACCAGGTGCAATCAGCAGGACT/   | 16986 | A_95_P053091 BP133088     |
| 17536 | 207 | 26 | 282  | TAACACTTGGTGGTTTTTTAATACGAGGATATCTTGTACACAAGTGTGTAGGGAAA(    | 16988 | A_95_P033544 AJ632822     |
| 17540 | 207 | 30 | 808  | TTCTTGTCAAACAGATAACGGCCTTTTATATATTGCAGCTCTTATGTTCTGGCCAAA    | 16995 | A_95_P177147 TA11894_4097 |
| 17541 | 207 | 31 | 844  | GCTCCAGTAAACTCTAGATTGTTCTAAAGCATTGGATCTTCCATATTATGATTTGTA    | 16997 | A_95_P198777 EB426417     |
| 17543 | 207 | 33 | 92   | GAGACATAAAGTGAATATGGATTGATTCTTACAGATTAACCAAGTCTACTGCAATC     | 17001 | A_95_P139707 EB443582     |
| 17551 | 207 | 41 | 415  | ATCGCAGGATTAGCTAGTGGGTTATTATCCTTCATTTATGAAATTCAGTGCTGCCTTTI  | 17016 | A_95_P088633 BP530161     |
| 17552 | 207 | 42 | 1127 | AGTGCTTCCCTTCAACTAGTGATGGTAATGATCCACAAATCTGTAAATAAACTCCCTI   | 17018 | A_95_P016121 TA13921_4097 |
| 17558 | 207 | 48 | 378  | ATTTGTTTATGCTTATCCTCTTACGCGAGCTCTCATCTTGTGTTTGGAGGAGCAGAGGG, | 17030 | A_95_P086225 BP529480     |
| 17564 | 207 | 54 | 0    | AAATTTTGCCTCACAAGGAAAATTGATTTGTGGTGTGATCCGTTCCAATCCTTGTC/    | 17041 | A_95_P030176 A_95_P030176 |
| 17575 | 207 | 65 | 454  | TGTGGCTAGTAATTCATTTGTGTGATCTGTAGAAAATCTGCAGACACCATTTCATGTCA  | 17063 | A_95_P256169 EH618184     |
| 17576 | 207 | 66 | 917  | TTTTCTGGATTGCTCCTCTTGGTGCATGAATTTGCTGGCTATGAGCTAGCAAGGAA     | 17065 | A_95_P209857 EB424838     |
| 17579 | 207 | 69 | 507  | GCACCTGAAATATCAGAAAGAGTAGCTTGTACTGCTGTATCTTTTAGGAAGTTTGTA/   | 17071 | A_95_P002221 FG637017     |

|       |     |    |      |                                                               |       |                           |
|-------|-----|----|------|---------------------------------------------------------------|-------|---------------------------|
| 17582 | 207 | 72 | 879  | CTATGTAAAGACTTGCATATTC                                        | 17077 | A_95_P010521 TA13014_4097 |
| 17583 | 207 | 73 | 248  | ATTCTAGAGGCTCAGATTTGTGACACCGGGTCTAGTGAGATTATATTGTGATTTTTG     | 17079 | A_95_P027381 BP534488     |
| 17585 | 207 | 75 | 348  | CTGCCTGGGATAGAAGCTCTGATATCAACAAGAAATCTTTTTTCAGTTGAGACCTTTAA   | 17083 | A_95_P079730 BP527835     |
| 17586 | 207 | 76 | 862  | TAGATGGCTGAGTCACCTGAATGTTGGTGAGTTTATTTCTTTCTGCACATTGATAGAC    | 17085 | A_95_P227809 EB678753     |
| 17587 | 207 | 77 | 761  | TTTATTCTACAGTATCTGAGATGAGAGACTGGAGTGTAGCCAAAGCAGCTGGTCTGC     | 17087 | A_95_P305358 FG167679     |
| 17590 | 207 | 80 | 369  | TAGTTGGGGAGGAAATCGAAGTTGAAGCCAAAGTATTCACGTGTTGGGAAGACAAT      | 17093 | A_95_P068830 BP137226     |
| 17591 | 207 | 81 | 811  | CTAACTCTTGACTTGTTGAATATCCAGTAGAATCTGTTACGCTTAAATATTTTCGGTC    | 17095 | A_95_P093433 EB439408     |
| 17592 | 207 | 82 | 861  | GCTGTGCCAATAAACTAAAATTTGAAATACCATCTTTCTTTGGATGATGGCCTCCTTI    | 17097 | A_95_P244912 DV159753     |
| 17595 | 207 | 85 | 441  | CTTCCCGATATCTTCAATCCTAGCATTCTAATCATAGTCTACTTCTTGATGAATACT     | 17103 | A_95_P265741 AM796086     |
| 17596 | 208 | 1  | 157  | GATGCAACCGTCTTAACCTCATTATGGACGTTTGAACCTGTGCTCTAAATCATCGAAT    | 16940 | A_95_P154717 EG649728     |
| 17599 | 208 | 4  | 770  | GGCCTGTGAGATGTTCTCTGTTATATTGCATTTCAATCAATGCTAAATTGTGTGAG/     | 16946 | A_95_P108762 TA12161_4097 |
| 17601 | 208 | 6  | 734  | GTGCATACATAGAGCTTTGTTAAACAGCGATGTCCGACATTTGACTCGTGGAGCTGA     | 16949 | A_95_P212912 TA19936_4097 |
| 17603 | 208 | 8  | 796  | TTTCGTGTTCCAAGTGTGATGTTTCAGTGGTTGATCTTACAGCGAGGCTTGAGAAAC     | 16953 | A_95_P214717 EB425616     |
| 17604 | 208 | 9  | 524  | GTCCCAAGAGTGTTATGGGAAGAACAAGTTGGTTTTGTATAGAATATACTGTATGC      | 16955 | A_95_P209237 TA19146_4097 |
| 17605 | 208 | 10 | 668  | GAAAGGATGTTTCTCTTTAACTTGATTCTGCTTCGATCTGTTTAGAAGTTCTGA        | 16957 | A_95_P212587 TA19868_4097 |
| 17609 | 208 | 14 | 729  | CACCCATACAGTTGGCTTAGTAAGTTTTCTAGGATCCAAATGTAGTAATACACTTA      | 16965 | A_95_P231234 EB440239     |
| 17611 | 208 | 16 | 497  | AAACACGGATGTTATTGTGTTGTCAAGGATCCAAGACAATCTGGATCTGAATTTGA/     | 16969 | A_95_P303788 FG638864     |
| 17612 | 208 | 17 | 586  | CTATATGAATTCTCGGTTACCATGTCACTCTCACTCTGTTAAGCTCATCAATATCTT     | 16971 | A_95_P233504 FG639166     |
| 17633 | 208 | 38 | 706  | TGAGGTAGAACCTTTTGTGATGTTTGAAGAATCTAAATAAAACGTCAGTTGATTGTG     | 17011 | A_95_P147722 EB452239     |
| 17634 | 208 | 39 | 805  | GCACCACAGCTATTGCATGTCGATTTTAAATTCCTAAGAGTTTCTTGCTGTTGAAACT    | 17013 | A_95_P097088 TA11961_4097 |
| 17635 | 208 | 40 | 4821 | GTCACCTTCACTTTAAGTTTGATAACTTAGTTGTTACCATTTTCGGCTGTACAATATTGGC | 17015 | A_95_P025026 EF520731     |
| 17639 | 208 | 44 | 468  | TTACGAATAAATCTAAGTTTTACTCTTGAGATGCATGATTGATGTGTATGCTGTTTG     | 17023 | A_95_P180552 TA12775_4097 |
| 17640 | 208 | 45 | 343  | AGGGTGAAAGCTACTGGATAACTTATGTATATATTTAGACGCTAAGATTTGAGCAAT     | 17025 | A_95_P209672 TA19240_4097 |
| 17641 | 208 | 46 | 790  | CTTTTTGTAATGACTGTGTAAGACGATGGTGGAATATATGTAATTGCTGTCTGTTTTA    | 17027 | A_95_P014461 TA12122_4097 |
| 17642 | 208 | 47 | 913  | TGCAGCAGCTTCTGCGTAGAACTGCTTACGTGTTTCATCTCTGTATCAATAGCTTGCA    | 17029 | A_95_P227554 DW000208     |
| 17651 | 208 | 56 | 649  | TGGACTTTACTTTCTAGAGATGAATCCCTTCGCATGGTTGAATGGAAAGCTTATCCT     | 17046 | A_95_P161032 EH619740     |
| 17653 | 208 | 58 | 711  | ATCCATGAAGGAGATGAACTGCTTGAGATAAATGGGGGAGAGGCTTGATGGAGTTGA     | 17050 | A_95_P150732 EB680859     |
| 17658 | 208 | 63 | 385  | AGTGATGATCCCAGCTTATCATAACTTTGGAAGAAGGGCGTGATTATGTGTTGGTC      | 17060 | A_95_P157622 EH615676     |
| 17660 | 208 | 65 | 804  | GCAATGCCAATCATAATTGATAACTATGGGGGGTTTTTTGTACAAAACCAAGCACCT     | 17064 | A_95_P013781 TA13953_4097 |
| 17664 | 208 | 69 | 402  | ACCGTCAATTCTACCCGAGCTATTGGAGAAGGAGGTACATATTACAAATCGACGT       | 17072 | A_95_P161377 TA17844_4097 |
| 17668 | 208 | 73 | 366  | TTCAGTTCTGCAGATGTAGTCAAACAAAATTCACCTCAATCACCATTGAACCTGGTGT    | 17080 | A_95_P104487 TA13616_4097 |
| 17673 | 208 | 78 | 1759 | AAGGGCCAAATCTCTATGTTACCATAATACAATGTGGTGGTTTTGGATTTTCTATTGGA   | 17090 | A_95_P003851 TA11817_4097 |
| 17681 | 209 | 1  | 749  | AGCAGTAGTCAATCAATATAGGATGGGTCACTGTCTCAGCAGCAGCGCTAGAAGCA/     | 17105 | A_95_P308488 FG147652     |
| 17685 | 209 | 5  | 591  | AAATGTCTGCCAATATGATGGTTTCAGTATTTTGCGGAATGTCCCACTTTTCTTTCTC    | 17112 | A_95_P245477 FG642695     |

|       |     |    |      |                                                             |       |              |              |
|-------|-----|----|------|-------------------------------------------------------------|-------|--------------|--------------|
| 17690 | 209 | 10 | 841  | GGAGTGCTTTGAAACAGTTTTTATCTGTTTACTGTGTTGTGGATTCTTTATTGCGTGTT | 17122 | A_95_P184872 | EB424704     |
| 17691 | 209 | 11 | 253  | ATCTTCAATATGAGCTTCTACGAGGGAACCTCTCTGAAAGTGGTGTGGTGGATATC    | 17124 | A_95_P102347 | DW003761     |
| 17692 | 209 | 12 | 328  | GGATAATGTTAACTTATTTGTTTGAGAAAAACCTGTAGGGAACCGTTTTCCCCTTG    | 17126 | A_95_P089138 | BP530364     |
| 17695 | 209 | 15 | 296  | GCTGAGACGATATAGACCATATAAGTACTGTATTTTTGGAATTGCTAGCACTTGTACT  | 17132 | A_95_P155167 | EG649930     |
| 17699 | 209 | 19 | 358  | GATCCTGTTATATGAATCCCCTAAAAAGTTAAAGGGAAAAAGAAGGATAATGCTGCTT  | 17140 | A_95_P118167 | DV161188     |
| 17700 | 209 | 20 | 713  | TCTAATGGATATGGACAGTGGTTGTTACCAGAAGATGCAGAGAGGATTACCAAGTCC   | 17142 | A_95_P218307 | EB440007     |
| 17704 | 209 | 24 | 859  | CAAGTCAATGTTTTGTGTACTCTTTGTTGCAGCTCGAAATTCACATTGCATGTACAAT/ | 17150 | A_95_P008006 | TA13354_4097 |
| 17705 | 209 | 25 | 1105 | GTAGTAATTGTTGTTTTATCTTTGGACAATGTATTTCCGGTTTTAGTGGAGAAGGGT   | 17152 | A_95_P206292 | TA18482_4097 |
| 17708 | 209 | 28 | 632  | TAAGGTGAGTGTGCTGATTCTAGTGTTCCGTTGGAGGTGTTTATGTACAGTATT      | 17158 | A_95_P069950 | D87821       |
| 17709 | 209 | 29 | 411  | TATCTGAATCTGGCTACTATTGCTCCTTTGTTGATTATACTTGAGGTCGTTTGTGCGA/ | 17160 | A_95_P286208 | FG644682     |
| 17710 | 209 | 30 | 681  | GATCAGCATGATTAAGGTTGACTCGGAACCTCTGAAGGCAAAGCTACAAATACCT     | 17162 | A_95_P222282 | EB438136     |
| 17711 | 209 | 31 | 1490 | CCTATGTGTGGCTGTTAGTACTATTTGCTAGATTCAAGTTAGGACTAGGTTACTTTA/  | 17164 | A_95_P197267 | TA16524_4097 |
| 17712 | 209 | 32 | 496  | TTCATCTTCCAAAAATGTGCACAGAAGCAGGCTGATAAGGAATCTGAGGCCGTTTTC   | 17166 | A_95_P002576 | FG147651     |
| 17717 | 209 | 37 | 883  | GAACTATTTGTAGGACTTGCCTCCAAATATAAAGACGTTATGCATTTCCATTGATAC   | 17176 | A_95_P202172 | TA17578_4097 |
| 17718 | 209 | 38 | 633  | GGAAGAGGTTATCCAATCATTTTGAAGTCTCTTTGTAGTTGAATTAATTTTTGGGGC   | 17178 | A_95_P155192 | TA18703_4097 |
| 17725 | 209 | 45 | 1338 | GTCGCATTGACGATTCTAGTTGAGAATATTAGTAATGCAAAAGTTTTGTTGTTGGT    | 17191 | A_95_P251832 | AY395738     |
| 17727 | 209 | 47 | 746  | GTTTTGTATTTGTGAGTTTCTAATAAAGTTCTCAAATGCATGGTGTGGTATGGGG     | 17195 | A_95_P246647 | EB429369     |
| 17730 | 209 | 50 | 2512 | CTTTTGAAAGAAGCTATTCAGGAACAAATGGACCGTTTTATACTTCAGGAACAAGCA`  | 17201 | A_95_P017531 | TC75692      |
| 17731 | 209 | 51 | 1131 | CTAGCTAAGATGTCTGAAGACAGCCTATTGCCATAAACAGTGAAGCATAATCTATTI   | 17203 | A_95_P242737 | AB433897     |
| 17734 | 209 | 54 | 726  | TAAAAAATGCAGGCTTGCAGAGCATAGCCCTACATGCAATCCATTTACGGACCAC.    | 17209 | A_95_P161312 | EH620054     |
| 17743 | 209 | 63 | 428  | TGAAAAATGACGGTCTGATGCTCCAGCTGAATTAGTACGTTTAGGAGCCAAGTGTG    | 17226 | A_95_P093428 | BP532257     |
| 17745 | 209 | 65 | 1099 | GGCTAACCGTGTACCATTCCATAGCAAAATTAGTAGCTATTATCACTATATATTTGTG( | 17230 | A_95_P019951 | TA15403_4097 |
| 17749 | 209 | 69 | 271  | CCCTGTTTTGAGAAAGTCTACAAAAGCAATTTTTCATGGCAAATCTAGAACTTGGTAC  | 17238 | A_95_P222357 | TA22016_4097 |
| 17754 | 209 | 74 | 173  | TGAATCTCCTGGTGCCTGAAAATGGTTAGCAAATGTGAGATGCTGACTGCCAGTGT.   | 17248 | A_95_P104652 | CV017119     |
| 17758 | 209 | 78 | 0    | CTGGGAGAACATTTACTAAAGAAGTTGTACAAGCTATGGCAACATTCAATGAGAAA    | 17256 | A_95_P258811 | A_95_P258811 |
| 17760 | 209 | 80 | 1190 | CATCTGGTTTCATAGGTTGTTTATCAACTATGCAGACTAACGAAGTTTTGCAGTTGAT  | 17259 | A_95_P032201 | TA14050_4097 |
| 17764 | 209 | 84 | 789  | TTAGAGTTCATTTCTTCTACTTGGAAATTTGAGCATATGAACAGCCGCATTATGTC/   | 17267 | A_95_P188752 | TA14640_4097 |
| 17767 | 210 | 2  | 373  | ACCAATGGCTTGCCTAATGTTGCTTTTCCAAGAATGCTACTATTATTTATGTTGAACC  | 17107 | A_95_P023741 | TA13130_4097 |
| 17768 | 210 | 3  | 622  | TGAGGACTTCATTGAAGTTGTTGGCTCTAAATGGAAGTGCAGAATTATCTATTACTAC  | 17109 | A_95_P015986 | EB435292     |
| 17770 | 210 | 5  | 245  | GTGGATGACTTTCTCCTGATCTTTGTTATGTACAGAATGTTTCTCATTTTCATGAATG  | 17113 | A_95_P121167 | DW001168     |
| 17771 | 210 | 6  | 334  | GGATTAGATCTAATCCTCGATACCTAAAATAATGATCCTTCTTTATTAGCCTTTCTCC. | 17115 | A_95_P111707 | CV020338     |
| 17776 | 210 | 11 | 450  | ATAGAACAGCGGCTGTGAAGCGAACGATTCATTTGTTTACTGCACTAAGTTTGTCTC   | 17125 | A_95_P193687 | TA15725_4097 |
| 17783 | 210 | 18 | 373  | GTAAATTGAAGACTTGCTGACAGATTGCAAAGCCACAGGAGCCCAGATCATGTATCT   | 17139 | A_95_P087383 | BP529780     |
| 17787 | 210 | 22 | 668  | AAGGTCACCTCTTTGCTTCATCTCGAGATAAATGGGTATAACTCATACCTTTTCTTCC  | 17147 | A_95_P225222 | EB445165     |

|       |     |    |      |                                                              |       |                           |
|-------|-----|----|------|--------------------------------------------------------------|-------|---------------------------|
| 17792 | 210 | 27 | 849  | ACACAGTAGACGAGGATCTGCTTGTGTAAAGATGGCACTCATGATGATTGCACGAGT    | 17157 | A_95_P224932 FG147089     |
| 17793 | 210 | 28 | 0    | TTCAATGCAACATGGACATGTCATTTGCTGATCCATCACCTATCTTGTTTCATCCCTAGC | 17159 | A_95_P259286 A_95_P259286 |
| 17794 | 210 | 29 | 220  | GAAAGCATTGAGAAGGTAACCAAAAATTGTATTGGAGATGTGGAATTTTATGCAGGT    | 17161 | A_95_P031996 TC76975      |
| 17796 | 210 | 31 | 758  | GAGGTTCTTGGCTTCTCAAAGAGCCTACTTATTTTGTGTGGAACTGTATTTAAATA     | 17165 | A_95_P017521 TA12515_4097 |
| 17799 | 210 | 34 | 1855 | TGCCTTCTTAACTCTGCGACCATGTTTGTCAATATTTAATCCTACCTCCTCATTAAAAA/ | 17171 | A_95_P237584 Y13466       |
| 17800 | 210 | 35 | 436  | TTCCCCAATTAGACCAGCCAAACTAGGCCAAAAAGGGAAGTGCCACTGATATGAAA/    | 17173 | A_95_P239559 AM847113     |
| 17801 | 210 | 36 | 487  | TAAAACATATTCCTCTGTTGTAACTTGTACCTTTTCAGTTTGAGTTTCGATTTTCC/    | 17175 | A_95_P021076 FG631866     |
| 17806 | 210 | 41 | 184  | TTCTCAAGAAAGGAGTAAAATTTTGTAGATATAGCTGATGCACTGGAAGCAAATGA     | 17184 | A_95_P136762 EB440509     |
| 17808 | 210 | 43 | 476  | TTGCTTCTTCAAGAAAAGTTCTATAACTTTTTCTCTTCCCGACTGTTCTGAGGATC/    | 17188 | A_95_P100323 BP535324     |
| 17810 | 210 | 45 | 499  | ATTGCTTGAGTTTCTTATCGTCGGTGTCTATTTGTACATCCGAACAAAGGCTAATATA   | 17192 | A_95_P091113 EB678107     |
| 17811 | 210 | 46 | 902  | GAGGCTGCAAAATTCAGCATTATTA AAAAGCTATGGACTAGTCCATGAAGACTGTATA  | 17194 | A_95_P229904 DV159496     |
| 17812 | 210 | 47 | 286  | CCGCCAAAGCAACTTTGTAACCTTATATCATTTCCATTTACAAGGGTTCTATTCATTTG  | 17196 | A_95_P216487 TA20716_4097 |
| 17817 | 210 | 52 | 647  | GTTGAAAAATGGAGTTCAACTGAAGTTTTGGGGAGTTTGGTTGACCAAGTCCTGCTA    | 17206 | A_95_P308083 FG644587     |
| 17818 | 210 | 53 | 1404 | CGTGGCCATTAGGCAGTGCCATTGAAGTTGCATCATCATTGACTTAACTGGGAAATG/   | 17208 | A_95_P206857 EF051589     |
| 17820 | 210 | 55 | 841  | TTACGGAATTTAGGGCCTTAGCTAAGTGGTTCCAGTGGCTATTGCCAGTAAGTTACA/   | 17212 | A_95_P273201 EB682721     |
| 17827 | 210 | 62 | 727  | CATTATCTATATGTATTACGGTTCAAGGACAAGGCGCTTGCTTTACGGAGATGAAAA/   | 17225 | A_95_P292698 EB428134     |
| 17829 | 210 | 64 | 262  | ATTTACTGCCACCCCTCTATGAACCGAGAGGGGAACCATAACTATTTCTTGTCCGAT    | 17229 | A_95_P034224 BP129934     |
| 17837 | 210 | 72 | 298  | GTTCTATCCGTCTAGGGTTTACTCGTGCCCTTTTTCTTCTCAATGATGGTATTTTGT/   | 17245 | A_95_P188033 FS437228     |
| 17838 | 210 | 73 | 458  | GAAGTACAATCACAGCACTTCTCCATTGTAACATTCTTAAAAACATGCGGATGAAAAA/  | 17247 | A_95_P022431 BP132516     |
| 17839 | 210 | 74 | 413  | CAGAAAGATGCCTGCGAGA ACTTCAA AACTGAAGATAGTAGGCCAAAATTTTGCATCT | 17249 | A_95_P220362 TA21591_4097 |
| 17842 | 210 | 77 | 1439 | TACTGGATCAGCACCAAGTTGTAAAGATAGCCTGTTTGGTCCAATTCGGCACGCGTTTT  | 17255 | A_95_P176417 X98161       |
| 17846 | 210 | 81 | 177  | GACATACTCTGTGACTAAGAGGTAGTTGATCACTCATTGCACTTCGAGCAATATA/     | 17262 | A_95_P141902 EB445518     |
| 17853 | 211 | 3  | 536  | TTCTCTGTACGCCACATTTGTCAGATGCACCATTTATATTGCTGTTCATACTAATATT/  | 17275 | A_95_P266581 BP534234     |
| 17856 | 211 | 6  | 657  | ATTATTCAACAAAATGCCAAGCTCAACCGAGA ACTGGAGCTTCTGAGGCATGGACGT   | 17281 | A_95_P305543 FG199826     |
| 17860 | 211 | 10 | 550  | GCTAAACGTGTTACAGAATCCTCTTCTGTTTCTGTGCTATGCAAATGATTTGAGTTAA/  | 17289 | A_95_P121742 DW001833     |
| 17862 | 211 | 12 | 371  | GGGGTGAAATGCATCTCTCTTGGCTGCTCTGTTTTCTTTGAAAGGAGGAAAATCCAG/   | 17293 | A_95_P092453 BP531808     |
| 17864 | 211 | 14 | 838  | CTAAAGAAGGCTCCTGCTGGATTTGGCAAATCATGAGTTTACTGAAATCTACAAAAA/   | 17297 | A_95_P269006 EB678914     |
| 17868 | 211 | 18 | 746  | TAATTGCGACTAGCTGATTTTTACTAAAGAATGCCATGACTTAATAGCTTTTGGTGT/   | 17305 | A_95_P017001 EB437994     |
| 17872 | 211 | 22 | 422  | TTTCGCTGATGAAATTTGGTATTCCTTTTATGGAAACAAGTGCAAAAAGTGCACCAA/   | 17313 | A_95_P156867 FG171924     |
| 17876 | 211 | 26 | 556  | ATTGCGAGATGCACTTGAACGGATTATTGTGAAATGTGGCTATGTTGTAATAGATA/    | 17321 | A_95_P219607 FG640950     |
| 17877 | 211 | 27 | 350  | AGGTGCTTGAACGGCTATGTGTTCTCGGTAATGATGATTTTTAAACAGTTTAAATCA    | 17323 | A_95_P107152 CV018234     |
| 17879 | 211 | 29 | 771  | GAAAAGAGCTTAGTCTTCCAGTAGTATCGCTGGACACACATCTTTTGTCTGCTGTG     | 17327 | A_95_P309558 FG142534     |
| 17887 | 211 | 37 | 767  | GGAGAACTTCATGTTTCATGTAATTTTACTTTGTTTGCCAGTTTACCTGAGCCTTTCTC  | 17342 | A_95_P258071 EB677495     |
| 17890 | 211 | 40 | 394  | AAGCAGAGATGTTTGTATGACCGTCCTAGAAAACCTGGTCGTAAGATAGTATGCCGAT   | 17348 | A_95_P023286 FG642251     |

|       |     |    |      |                                                                |       |                           |
|-------|-----|----|------|----------------------------------------------------------------|-------|---------------------------|
| 17892 | 211 | 42 | 1393 | GTTTGCTAATTGATACTGTCAAGCAAAATTTAATTCTACAATTGGTGGGTGCGGCAG/     | 17352 | A_95_P008416 AB032545     |
| 17893 | 211 | 43 | 902  | GGCTTTAGAAAGATTTTACAGTGGGATACTGATATCGAAATTGACATGCTTCTTGGA/     | 17354 | A_95_P221857 TA21908_4097 |
| 17894 | 211 | 44 | 299  | CTAGAGCATAcATTAGTGCAAAAAGGACTTGTCAACTTATGCATACATAATCTGCA       | 17356 | A_95_P194757 EH617633     |
| 17900 | 211 | 50 | 841  | ATGGGGTGTGATGTTGCAGCTTGGTGTAGCTTTTGGAGCTACAAGATTGGTTAT         | 17368 | A_95_P217772 EB427867     |
| 17903 | 211 | 53 | 210  | AACCAAGATGTACAACTCCACACAAGGAGTGACAGCTTTAATCTTTCCCTCGTA         | 17373 | A_95_P033744 AJ632934     |
| 17904 | 211 | 54 | 686  | GTTTAGAGGGAGCAGATTTGGTTGCAGATTGTAGTCTCATACAAAATCAGAACACCC      | 17375 | A_95_P266641 EB683902     |
| 17905 | 211 | 55 | 774  | CCGGAGACAATATAAGATCCTTTCAATTGTATGTTTAGGTCATAATGTGCTGTTTTCT     | 17377 | A_95_P218842 TA21264_4097 |
| 17907 | 211 | 57 | 712  | CAAACCTCAAGGACAGCTCAGTTGGATACAAATTTACAGACAGAATCTTCTTCGA        | 17381 | A_95_P221247 EH622995     |
| 17908 | 211 | 58 | 1096 | CTGATTATTAATATGCTGCAACCATCTATACTTGAGATGTGCAATAGAGCTATGTT       | 17383 | A_95_P014386 TA16663_4097 |
| 17909 | 211 | 59 | 587  | TCTTGCAGCCAAAACCATCCATCCCCATTCTGGGTATATATCATGTGTTGTTGGC        | 17385 | A_95_P120857 DW000825     |
| 17914 | 211 | 64 | 360  | ATTTCCGGGGTTTTAGTCCAAGGATTGTTGCTCCGTTTGTAGCTCAAATTTTACGCTTTGTT | 17395 | A_95_P097523 BP531659     |
| 17919 | 211 | 69 | 587  | TTTCCATCCTGTATAATTTGTTGAAGTGATATCATAAACAGCTGGTACAGGTGGTCAT     | 17405 | A_95_P082995 BP528647     |
| 17922 | 211 | 72 | 319  | TAACCTTTGAAAGACAACGTTACCTGTACGAATTTGGAAGTTGGTTGACAAACAACCC/    | 17411 | A_95_P102852 CV016231     |
| 17923 | 211 | 73 | 274  | CCTAGTGTTAGTCTCTCTCAAGCTTCGCTCATTGACATTTTCTTGATAAGAGGTGCAC     | 17413 | A_95_P127567 FG135867     |
| 17924 | 211 | 74 | 111  | AGCTGTATTGAACCGGTCTGAGAGAGAACTGAAATGGCATGTTGATGAGATCCCACT      | 17415 | A_95_P156727 EH614748     |
| 17925 | 211 | 75 | 384  | CCATTAGAGTACCTTAGAACTTCGAGTTATGGCATAAGTGAAGCACTCTTAAGTTCAT     | 17417 | A_95_P130107 EB430105     |
| 17928 | 211 | 78 | 2334 | CAGTGAGTAGGTGTTTGCAGAAAGCATTAGAAGTATAGAAATCATCAATGAGATAGC      | 17422 | A_95_P306688 AB263747     |
| 17930 | 211 | 80 | 494  | GAGAAACGTGGGGGAGGGGGCTTTGTTCTTTTTGTTGTTTTGAAATATTATTAATT       | 17426 | A_95_P061695 BP135325     |
| 17937 | 212 | 2  | 771  | TTTCATTATCAGCATTCTGTGCTGTTGTTCCGCGAATTAATGCTAAATCTTCTTG/       | 17274 | A_95_P234394 DV160348     |
| 17940 | 212 | 5  | 309  | AAGGAGTACCGCACAAAAGGTGGCAGACTGAGCTACCAACATTTGCAACAGGATA        | 17280 | A_95_P103142 CV016362     |
| 17942 | 212 | 7  | 0    | CCGTTCAAGGCAAATCGAAGCTTTCCATCTACTTCGGTCCTAGAGTTGACAATCTTGA     | 17284 | A_95_P239669 A_95_P239669 |
| 17945 | 212 | 10 | 280  | GTTCAAGATTTTTGATGTACCGTCTATCTGAAGTTGATTGTCACGTTCTAATGTTTTCT    | 17290 | A_95_P004531 TA17295_4097 |
| 17947 | 212 | 12 | 1214 | GCGTCTTTGTAGTAAAAAATATCTTTGGGTTATTTGTTCCAAGGCCTAAACTAGTAA      | 17294 | A_95_P028286 TA20135_4097 |
| 17952 | 212 | 17 | 401  | AAGATCTTGTGTGAACTTTTATCCCTTGGGGATTGTATTCTGCTTCAGCTGAATTA       | 17304 | A_95_P031006 FG626648     |
| 17953 | 212 | 18 | 426  | GGAGTCCCCTTCTATTCTCCCCTATGTCAATTACCTTATGTACTTCTTTTGTAGACTCC    | 17306 | A_95_P098943 BP534702     |
| 17955 | 212 | 20 | 394  | GATATGGCCAGTGCTACATTGATTCAAATACTGAATTAGACGTCACCTATAACCTAAT     | 17310 | A_95_P022461 TA13487_4097 |
| 17956 | 212 | 21 | 839  | ACAGGATGCTAGGGTTATTCATTTGCACAGGAAACATGAATGACACCTTATATAAAA      | 17312 | A_95_P229574 DV160201     |
| 17961 | 212 | 26 | 831  | TCTCGAACAGTCGAGAAAAGATCAAGAAATGCACCAGTAGGAGTTCCTTCCAGCAAC      | 17322 | A_95_P191777 EB450564     |
| 17963 | 212 | 28 | 149  | GTAGGCTGTGACTATATTGTGCTACTCATGTTACTAACCACCCCAAGAAAA            | 17326 | A_95_P067680 BP136939     |
| 17964 | 212 | 29 | 723  | AGTGAGACTGTCTTTTCTTCCCTCACTATTATCAGGTGGAGCCTTTTATTGAATAT       | 17328 | A_95_P015821 EB439146     |
| 17966 | 212 | 31 | 587  | GCTCTCTCCAGTTGTAATTTGTTGGTATGATCCAATTGTTTTAGGCCCTTTAAGTT       | 17332 | A_95_P042746 BP130434     |
| 17972 | 212 | 37 | 1134 | ATTTAGTATGCCTGATTGGTCAACGATGTGTATATAAGTCTTGCCAGCTTTATCTACG     | 17343 | A_95_P191882 TA15331_4097 |
| 17977 | 212 | 42 | 448  | GGGATCACAGTGGGTTTGTGTTGTCATTGTACTATTTGACGATTCACCTCCACTTTTT     | 17353 | A_95_P131217 EB431362     |
| 17978 | 212 | 43 | 505  | GTGGTTTGGAGTTTCTTTCTTGGCCGTCTAAATTATGGGCTTAAGGTTTTCTTTATTCC    | 17355 | A_95_P198512 FG642795     |

|       |     |    |      |                                                              |       |                           |
|-------|-----|----|------|--------------------------------------------------------------|-------|---------------------------|
| 17979 | 212 | 44 | 123  | GGGAATACATTCCGCTTCGATTTGCAGAACACATTACAGAAGCTATCCGAACAATATC   | 17357 | A_95_P042911 BP130478     |
| 17981 | 212 | 46 | 781  | TCAGATACAATTACTTTTGGCTATCCATCATCATTGGGCTCAATCTAATGTTTTCTAGC  | 17361 | A_95_P127352 EB426901     |
| 17983 | 212 | 48 | 464  | GCAAAATAACGAGTTAAGGAAGTTTTCGACTTTCCTCAGTTCTCCCTCCCTCTCTCT    | 17365 | A_95_P071240 BP525655     |
| 17984 | 212 | 49 | 654  | TTGGTGATCGGGTGTCAAGTTTGTGTGAAAGATGGTTGTAATGTTACTATAATAAC     | 17367 | A_95_P016221 EB431066     |
| 17988 | 212 | 53 | 1071 | ATCTCTGCAACTCTCTGTATTTGGATGCTTCTTTTTCTGATTGGAATGACCAATTGA    | 17374 | A_95_P251767 AB119476     |
| 17991 | 212 | 56 | 772  | CTTCAGCGTCCCTCAAGTCTTTTTATCAGCTTGAAAGAAAAGGCAAAATTAATGAGGT/  | 17380 | A_95_P179207 TA12449_4097 |
| 17998 | 212 | 63 | 753  | ATACCAGAGACATACTGAGTTATGCAAATGAAAAGATTCTGGTGAAGCCTTAGCACA    | 17394 | A_95_P189227 TA14745_4097 |
| 18002 | 212 | 67 | 632  | AAGAGATGCAGCGTGTGTGCGCTTGGATTTGTATTTAATTTCTTGAACCTTGATTATT   | 17402 | A_95_P134787 EB437562     |
| 18003 | 212 | 68 | 807  | ACCCAGTTTCTTCAAATGCACAGTCAATAATCAATGGCTACAGATTAAGCTGTTGTA    | 17404 | A_95_P010021 EB677669     |
| 18004 | 212 | 69 | 455  | AAGGTGAATGAACCTTCCCTCTACTGATAAATTTCTGTCATGAAAAACGAGTACTAG/   | 17406 | A_95_P261581 BP132748     |
| 18006 | 212 | 71 | 656  | CCCTAGTTTTTTGGTTTTACTTACTCCACCAGCAGAACAAGATATGGTTAAGTTTTAT   | 17410 | A_95_P030346 TA11873_4097 |
| 18007 | 212 | 72 | 906  | CGAAATATGTGTTTCAATATGGTGATAGTCTTTAGAGCCTCACATTGTTTAAGTTGAC   | 17412 | A_95_P258201 TA11901_4097 |
| 18010 | 212 | 75 | 681  | GTGTATGTATGTTAGCTGAGACAGAATAGTGCCTATTTTCATGTGTGAAATGCTTTC    | 17418 | A_95_P030056 EB438892     |
| 18015 | 212 | 80 | 415  | ATATACTTGAGTTTCTGGGCAGAGGTGCACTACAACCTCAATCTATCCTCAAGGAGAC   | 17427 | A_95_P091448 BP531357     |
| 18022 | 213 | 2  | 710  | TTCCTTGCCAGCCTGCAGAGAAATATCCGTCAATATTCGCTAAGGATTCTATATTTG    | 17439 | A_95_P160422 EH619111     |
| 18023 | 213 | 3  | 91   | CCAACAATTAGTCCCGATTTTGAGGAGTTTATTTTCCCAAAATTCTTGTTAAAGTTTC   | 17441 | A_95_P130142 EB430151     |
| 18024 | 213 | 4  | 377  | TGCGCTCCCATAGATGTA AAAAGTGTATCATTTGGGGATCATACTATATTTGTGAGTC  | 17443 | A_95_P003676 EB433911     |
| 18029 | 213 | 9  | 904  | AGATGCCAATTGATAGAGCTTGAGCCTGCTAGTTTTTCTGCTGTAACCTAACTGGA     | 17453 | A_95_P244957 EB679726     |
| 18031 | 213 | 11 | 826  | CTCGTGGCGTCACATGTGTCTTGAGTCACTAAATCTATTTGATCTTATTTTTCCATTC   | 17457 | A_95_P218467 TA21181_4097 |
| 18037 | 213 | 17 | 742  | ATGTTTTCGTAGCCCATGAAAAGTGACTTTGGTGGAGCGGCTGATTATCACACATTGCT  | 17469 | A_95_P160182 EH618839     |
| 18043 | 213 | 23 | 676  | AAGCTGACAATCAGCGTCATGCTGGGATAAATTCTGATTGAGCTCGCTTATTCATGC    | 17481 | A_95_P001051 FG148930     |
| 18044 | 213 | 24 | 1097 | CCTAACTAAGATTGTTCTTGAAAGAGATCCGTATCTTGTACGCCTTTTGGATTTTATT   | 17483 | A_95_P191207 TA15179_4097 |
| 18048 | 213 | 28 | 672  | TCTTTCATCTTTTTAGCTGAGGTTTATCGGAATCGTCTCTGTGCCTCCAGGTGGGGT/   | 17491 | A_95_P256464 FG140967     |
| 18051 | 213 | 31 | 406  | CAGTAGAAATTGTTGTGTA CTGTTTCTTTGTTGAATGCAATAAGAGTCCTCAATTTT   | 17497 | A_95_P154872 EG649794     |
| 18055 | 213 | 35 | 480  | GATTTGCACAACTTCGAGAGGATTTGCTGCAACTGCTGTCTAAAGTGTCTACCTTAG    | 17504 | A_95_P170741 EH664973     |
| 18056 | 213 | 36 | 618  | CAGGGATGATGAGCAGAAAAGTGGCCTAAGATTATTGCCACTAAGTAAGAATTAGTT    | 17506 | A_95_P153292 EB683563     |
| 18057 | 213 | 37 | 1556 | GGTTGGAGTACCTACTATCAATTTTGTGCGGTGTGTCTTTGTTTTGTATTGTAAGTCTA/ | 17508 | A_95_P179672 X79141       |
| 18058 | 213 | 38 | 49   | CGAAGTCACTAGAGGAATATTCTGATACTTGACAGGCTACCAAAAATCGTAAAAATG    | 17510 | A_95_P104407 CV016994     |
| 18061 | 213 | 41 | 706  | AAAGGTCCAATTTTCAAGTTTCTTCTGCTCTTTTCTCCTATCATTAGATGATTCTATC   | 17516 | A_95_P136452 EB440211     |
| 18067 | 213 | 47 | 1110 | TGCTGTAAATTGATGGATATGTGGATTTTAGTAGCAATATAGCAAGTCTGGTGCTTTC   | 17528 | A_95_P024766 TA17938_4097 |
| 18069 | 213 | 49 | 816  | GGGTATGCATCTCATGTAAGTTCATCAGTGTAAAGGTCTATGTTCTCCCTTGATTTT    | 17532 | A_95_P116237 DV158848     |
| 18070 | 213 | 50 | 491  | TTGCGCTCCGGAGATGGGTCATTTTCATGCATATCTAGAGCATTGTTCCACTGTATGCA  | 17534 | A_95_P091298 FG159805     |
| 18076 | 213 | 56 | 856  | GCTCAAACCTTCGTTACATACAATTAATAATGTCCAATCAAATGATGATAAGGTATC    | 17545 | A_95_P208197 EB424930     |
| 18080 | 213 | 60 | 150  | TGTATTTGATGGGGCCCAAATGCTGAAATGACCTCTGTTGCTATGAAAGTTCAAACA    | 17553 | A_95_P241210 AJ718197     |



|       |     |    |      |                                                             |       |              |              |
|-------|-----|----|------|-------------------------------------------------------------|-------|--------------|--------------|
| 18081 | 213 | 61 | 533  | CACATGTACTTTACGCAATCATTGCCCTTACTTTATGTATAGATACTCCTATGAAATCT | 17555 | A_95_P270741 | AM832190     |
| 18083 | 213 | 63 | 369  | ACCTGTTTACTGGATACTGCATACTTGTATACACAAAAGAAAATGATGAACGGAGA    | 17559 | A_95_P129672 | EB429639     |
| 18090 | 213 | 70 | 984  | CCGTTTGGATCATCTATTTGGAAAAAAGAAAAGCACAAAGGATTAAGCTCCTTTAG    | 17573 | A_95_P176942 | TA11832_4097 |
| 18092 | 213 | 72 | 390  | CGTGCTAGGCGGGGGCATTGAGCAGATAGAGATTTTATTCAACAGGTTCAACTGAA    | 17576 | A_95_P308533 | FG642724     |
| 18093 | 213 | 73 | 758  | TGCCCCGATGCTCCTAGGAGGCCTGCAAATCGATTTAAAAATATTGACAAGGGATTA   | 17578 | A_95_P185912 | EB434114     |
| 18094 | 213 | 74 | 642  | ACCAGATTCATGATAATGATATCGTGTTTTTTGGTTATGGGTTCTCTGATTCTCATGA  | 17580 | A_95_P025417 | FG637548     |
| 18095 | 213 | 75 | 1398 | AGAGCTCAAGGAAATCCGTGGGATGGTTTTCTTTTCTCATAATTGCTGGTTTGGAGAA  | 17582 | A_95_P257836 | EF110692     |
| 18104 | 213 | 84 | 627  | AAACCCATGGTATTAGGAATCCACTTCTCCCTCCTGGTCTATGACAGTTTCCAATT    | 17600 | A_95_P081785 | BP528350     |
| 18105 | 213 | 85 | 511  | TGTGCCGAGAGTGTTGCCAAAAACGAGGATCCTAAATTGGTTAGTAGGAATAAGA     | 17602 | A_95_P151762 | EB682700     |
| 18108 | 214 | 3  | 790  | CTCCTTTCCCATGGCACTTGGTGGTTTCTACTTATGGGACATACACTTATCAGCTAATA | 17442 | A_95_P195642 | EH621524     |
| 18111 | 214 | 6  | 294  | TGAATGTACAGTGGTGTATGAATTGAATGTCTAAATGGGGATGCATTCCTAAG       | 17448 | A_95_P191792 | TA15313_4097 |
| 18116 | 214 | 11 | 126  | GTGGATTGCTACTATTTGCAAGAGCACTTTCGGGGCATGTTAGGCAAAGTCATGTTT   | 17458 | A_95_P033894 | AJ717866     |
| 18118 | 214 | 13 | 277  | TTCTTCAATGAAACAGTTCACATTTTCCGGCCTCTCTTCTCTTCTAACTACGACTGAC  | 17462 | A_95_P066300 | BP136564     |
| 18119 | 214 | 14 | 163  | CCTCCAGCCTAGCCAAATAAGAGTATTGTTTTTGTGTAATGTTTATGAATGTCTAA    | 17464 | A_95_P139112 | EB442808     |
| 18121 | 214 | 16 | 762  | CCTGGAATTGATTTTACGTTTCAATTTCTTTTACCAAACCTCACGCGATCATCGTCT   | 17468 | A_95_P024096 | TC69715      |
| 18122 | 214 | 17 | 892  | GATGGCCTGTAAAGCTGTCGTGCGTTACCTGATAATATAATGAGATTTTGTGTTGT    | 17470 | A_95_P000146 | X52743       |
| 18129 | 214 | 24 | 821  | CAGATACGTAGTTATCCCGCTCTGGGTTCTGATATTTACTTAATTGTCGAGGTCCTC   | 17484 | A_95_P272326 | EB449303     |
| 18135 | 214 | 30 | 854  | TCTCACCATGCTTCTGAAGAAAGGAGAAAGAGGAGGACTTACCTCCCTTTGACATAG   | 17496 | A_95_P292788 | FG155230     |
| 18139 | 214 | 34 | 346  | GTGATCTACTTGTGCTTTTTATCCATTCCAGCCGTGGAGGGTAGGGCTTCTATCCTTT  | 17503 | A_95_P092598 | BP531878     |
| 18141 | 214 | 36 | 394  | CATAATTAGCTATCGTTGAATCCCGGTGGACTGCTGAAGCTGGCTAACTACTGGGAA   | 17507 | A_95_P075525 | BP526751     |
| 18143 | 214 | 38 | 283  | ATCCTTCTCATAATAAAGTTTACTTCAAGACTCCTGTAGGAATTGGAAAGTCTTTTCT  | 17511 | A_95_P161322 | EH620068     |
| 18144 | 214 | 39 | 1516 | ATGGAAGAATCAATTATGATGAGTTTGGTGCCATGATGAGGAAAGGTAATCTGGAT    | 17513 | A_95_P063925 | FJ026805     |
| 18147 | 214 | 42 | 800  | GACTGTATACGTCTTTACTCTTTCTGATGCATATCGCGACGCAGGATAAAGAGGTGT   | 17519 | A_95_P298553 | FG160018     |
| 18154 | 214 | 49 | 818  | TATGAATTCCAAGAATCCTGATATGGTCGTCTTCCACCTGTAAGTACGAGGTGAAC    | 17533 | A_95_P151207 | EB681448     |
| 18158 | 214 | 53 | 438  | CCTAGGGTTTTGTATTTTATAGCATCTAATATCCAATGTGATGAAAGGCACTGCCTT   | 17540 | A_95_P252714 | TC63485      |
| 18160 | 214 | 55 | 285  | GGATCACGTACGATAACGGAAAAATAATTGGATCGAGATTCATAACTATACATCAT    | 17544 | A_95_P012336 | BP530730     |
| 18161 | 214 | 56 | 206  | CGATAAATCTGCTTAAGACACTACTCCTCAGATCCTAATATGCTTATTGTCTTAAGTTC | 17546 | A_95_P118342 | DV161351     |
| 18165 | 214 | 60 | 814  | AATACACTGCGTCATATTTGAGTGTCTCGTGTAATTTTGGTGCATGAAATCAGCGAC   | 17554 | A_95_P262496 | FG139580     |
| 18166 | 214 | 61 | 805  | TTTTACTGAGAAGAATGCTAACTTGCAGGGTGTGGAATTGAAGACTCAGGATGTTGC   | 17556 | A_95_P199602 | EB425577     |
| 18173 | 214 | 68 | 694  | AAGAAATGTACCGACTCTTGTGACGCCTTGTGTTTGTGCAATAACAGAAAAATTGT    | 17570 | A_95_P025406 | DW004280     |
| 18178 | 214 | 73 | 162  | CTCCCCTGAGCATCTGTATACAATCTTAGTTTAGATGTCTAAATATATAGACATGGC   | 17579 | A_95_P120637 | DW000599     |
| 18179 | 214 | 74 | 893  | GCGGAATTGATGTTAACTGTGCTGAAAGTGTATGCTTTTTATTGTGATGTTGTGATT   | 17581 | A_95_P014796 | TA14870_4097 |
| 18182 | 214 | 77 | 1514 | GAATATTGCATGTGTGAGTTTGACTTGAACCTTCTATTCCTTTTGTGTCATAGATGCA  | 17587 | A_95_P006496 | TA13272_4097 |
| 18183 | 214 | 78 | 797  | GCAAACCAAACAGATGTTTGTACAGTAAGAGGAAGCAAATCGTGTTTTTGGTATTTT   | 17589 | A_95_P009256 | DV159699     |

|       |     |    |      |                                                             |       |                           |
|-------|-----|----|------|-------------------------------------------------------------|-------|---------------------------|
| 18188 | 214 | 83 | 481  | TTCCCAACGTGACATGTCCAGATCTTACTTCTATTTAATCAAGCTGAAATGGTTTCAT  | 17599 | A_95_P185122 TA13846_4097 |
| 18190 | 214 | 85 | 781  | ATTTGCCGAAGTATGGGGAAAGCTGTCATTGTTGCCACCAACATGCTGGAAAGCATG   | 17603 | A_95_P206647 TA18563_4097 |
| 18195 | 215 | 5  | 472  | AGTACATGATATGAAGTCCAGTCCAACAAACAAAGGTTGAGGTGGGTTTTTGAA      | 17612 | A_95_P130942 FG623870     |
| 18198 | 215 | 8  | 515  | CTGTAAATTGTTATGTATTTAATAGGGTTTGAGTTTGATGAATACCCTGGTCGTGCT   | 17617 | A_95_P074725 BP526541     |
| 18199 | 215 | 9  | 1333 | ACTCGGGTGGTGAAGAGGTTATATATATAAAGCAGGGCTTCTGCTGCTGAAGGAATC   | 17619 | A_95_P202167 TA17577_4097 |
| 18211 | 215 | 21 | 0    | CTCTTTGATATGGATCCAAGTGAATAACAGGTGCAATCGATCAAGATCCCATAGCAC   | 17643 | A_95_P302318 A_95_P302318 |
| 18214 | 215 | 24 | 862  | GGAAGGAGGAAGACCACTCGATATAACTGTCACGAAACTGGATGTAAATAGTATTA    | 17649 | A_95_P010011 EB427799     |
| 18218 | 215 | 28 | 759  | ACTGCCTCCTCCCTCATATCATACCCTAAACCCTAATGATCTAGAGATTACTGTGTTAT | 17657 | A_95_P302403 FG177828     |
| 18219 | 215 | 29 | 803  | AGCATCCCGTGCCAGGAGACAAAGTATGATTACGTGAACGGATGCAATTCAGATGC/   | 17659 | A_95_P126842 EB426202     |
| 18220 | 215 | 30 | 352  | GGCTGCTCCCTGTATCTGTGCTTAAATCTGATATATGGAATTTTGAACTTTTCTAGCC  | 17661 | A_95_P029491 TA17540_4097 |
| 18222 | 215 | 32 | 645  | TGTTCTATAGGTGTTTCTTAAAAGAGGGCGATCTAGGGACCGATGATGTATGTTCC    | 17665 | A_95_P155957 DW003703     |
| 18223 | 215 | 33 | 711  | CTTCTTGTGCTCAATTGGAACTTTTGTTTTCTTAAAGTTTCTAATTCTTCGACAGGCC/ | 17667 | A_95_P315028 FG199077     |
| 18224 | 215 | 34 | 1269 | GAGTGAAGTTTACAGTTATGTTGTCTCCAAGCAAGACTAAGTATGTGTTGTATGCATT  | 17669 | A_95_P178817 TA12351_4097 |
| 18227 | 215 | 37 | 580  | TGATCACATGCTAAAAATGATCATTATTGGTGATTGAGAATATACCTTGGCAGTTCTGT | 17675 | A_95_P156572 EH614292     |
| 18231 | 215 | 41 | 354  | CTCTATGGATTTGGTGGTTAGGTTGTATCAGTAAGTGATTTTAGGTAAGTGAATGG    | 17683 | A_95_P104892 CV017209     |
| 18232 | 215 | 42 | 626  | TGTGGCTTTTGATGATAAACTCCTCCTGTCAAGTATAGGAATTGTGAATGTTGATTG   | 17685 | A_95_P017791 EB426919     |
| 18233 | 215 | 43 | 313  | AGAAAAGTGAAGAATACTGCACTGTACATGTTGAGCCGCACCAACTAGATTGTCAGGT  | 17687 | A_95_P090243 BP530876     |
| 18234 | 215 | 44 | 669  | GGAATGCTTTCCCATAGGTGAACATGTATTACTTGACCTTTATCTGCAAGCTACTAAG  | 17689 | A_95_P068390 BP137117     |
| 18235 | 215 | 45 | 463  | GGTAGATGAGTTACTCTTTATATGCTGTGGTATTTGCCCTCCAGACTTTATGTATTAC  | 17691 | A_95_P019946 TA13616_4097 |
| 18238 | 215 | 48 | 682  | CAGACTACATTTCCATATCCACTTTGAAGAAACCTGTACCATGACATAATCAAGGATT  | 17697 | A_95_P194112 TA15823_4097 |
| 18241 | 215 | 51 | 246  | CTTTTCTAAAAGCCTCAGGAGATGGGCAAGCAAATGGTCCAGATGATGAAAACGTTA   | 17703 | A_95_P070115 BP192523     |
| 18245 | 215 | 55 | 1061 | TAAATCATATGGTATGACCCCACTCCATCTTGCTACTAAGGGAGGTCACGTGCGAGT   | 17711 | A_95_P148312 TA15076_4097 |
| 18250 | 215 | 60 | 510  | TCAAAAATCATAACAGAATCCCTCTACTCTGGAGCTGCAAAAGGCAGCAAATCAAGGA  | 17721 | A_95_P082600 BP528551     |
| 18251 | 215 | 61 | 265  | ATAAGACTACTCCTCAACCTTTGAATTGCCAATATGGCTCAATATAACATCAGCAG    | 17723 | A_95_P085700 BP529351     |
| 18255 | 215 | 65 | 806  | TACTTGGCTTATTGAAGATGGTTCCTGCTGCAATGATAATCAAGCACATCATATCTTT  | 17731 | A_95_P147067 EB451309     |
| 18256 | 215 | 66 | 134  | TACATAGAACATGAACACAATCAGAAATACAATAATCTTTGTGGCCTTGGGTTTCGAC  | 17733 | A_95_P145647 EB449412     |
| 18258 | 215 | 68 | 776  | TCCTACTTTTTAGCTGATTTACATTCAAATCTCATAGGAAAGTTTGGAGATGAGAG    | 17737 | A_95_P297738 FG172791     |
| 18260 | 215 | 70 | 787  | ATTCCACTACTGAAGCAAATCTGGATTCTTTGAGACTGGAATACTAGCTGGTCCATT   | 17741 | A_95_P161022 TA12711_4097 |
| 18262 | 215 | 72 | 1541 | GGAGTTTCTGAGCTGTTGTTTATTGTTTCATGTATGATTTTGAATCCTTCGGATATGA  | 17745 | A_95_P002976 AB264104     |
| 18268 | 215 | 78 | 184  | ATACTACAGCCCATACCCCTAATTTCTGGTTACATTTTGAATATCGTATGGGTGTGA   | 17757 | A_95_P107477 CV018396     |
| 18271 | 215 | 81 | 617  | TGGATAAACTTCCGTCAAAGTCCCAGTTGACACTGAAACTAAAGTTACTACTATCT    | 17763 | A_95_P018361 TA12423_4097 |
| 18273 | 215 | 83 | 1584 | CTTGTTTGGCGAGAAAAACAAAAGGTGATTCGTAAGTGGTGGTGGTGGTGGTGGTGGT  | 17767 | A_95_P251723 X65974       |
| 18277 | 216 | 2  | 267  | CCACTGTTACGGCACTGACAGAGCCTATTGATATATAGTGAATGGATTGACGAGT     | 17607 | A_95_P089768 TA14411_4097 |
| 18283 | 216 | 8  | 1097 | ATATCGTAAACCGGTTGTATCATGGAATTAATGTTTATATTTGATTCCCGTACTTCTGC | 17618 | A_95_P015861 TA14048_4097 |

|       |     |    |      |                                                              |       |                           |
|-------|-----|----|------|--------------------------------------------------------------|-------|---------------------------|
| 18289 | 216 | 14 | 865  | TAATGCATCTGTATAATATGTATTTAGTGGCCAGAAGTGCATCTTTGTAATTGTCTG    | 17630 | A_95_P182647 DV157864     |
| 18292 | 216 | 17 | 911  | TTTGCACCACGCTCCCTGCAGCTGGTCATCCAATTACAATAATATGAGCGAATGAATC   | 17636 | A_95_P011641 TA13889_4097 |
| 18295 | 216 | 20 | 407  | TTGTATTGTATGTGTGTGCTCGTTTGTGAGACTCTCAAGTTGTGTTAGTGGTTTGT     | 17642 | A_95_P023611 FS416927     |
| 18296 | 216 | 21 | 287  | CTTGTTGATCTTGGATCGAACAACTGGAGGAGCAACATGCTCACAACTCTCTAC/      | 17644 | A_95_P102522 CV016057     |
| 18297 | 216 | 22 | 458  | GGATTCAACTCTTGGTTGTTGTACAACATGGATGTCACAATTGTATTATGTTAAGTT    | 17646 | A_95_P001336 FG641133     |
| 18298 | 216 | 23 | 345  | TGGGGTAGTCTTGTAGAAATTTTATCCGAATATGCGATTGAGCTTAAAAGACAGCTT/   | 17648 | A_95_P110792 CV019908     |
| 18302 | 216 | 27 | 985  | ACCATTCAACTTATCCTGATGTAGTGGCTTTTGGACTCTTTTGTGAACATTGTTGCAT   | 17656 | A_95_P000431 X97967       |
| 18303 | 216 | 28 | 461  | TTTCTCAATCTGATATATTTCTGTAACGTGATTTGGGGTGTAAATGTAACAGAAACGTG  | 17658 | A_95_P000156 TA11669_4097 |
| 18304 | 216 | 29 | 843  | CTCGATTTGAACTACGGCTTTACCAGATAAACTAGGAACGATGGATCAGGATGAAC     | 17660 | A_95_P269541 EB427988     |
| 18309 | 216 | 34 | 698  | CGGATGATTGTGAATTTGCGACATTGCACATTTTTTTCAGCAAGTATGTAATCATATT   | 17670 | A_95_P019961 DW001751     |
| 18311 | 216 | 36 | 586  | ACGACTGGAAACCACCACCTTCTATATTACCTGCTCCTATTTTCTCAAATTGTGTGATT  | 17674 | A_95_P005811 TA12644_4097 |
| 18313 | 216 | 38 | 744  | GGATCCAAATCCAAATTCAGAATCACTACATTCTAAGATTATGGAGTCAACTTGGGT    | 17678 | A_95_P162037 EH620779     |
| 18314 | 216 | 39 | 848  | TTGCTGAAATCCTGGTGGTTTACCTGGTGTATGAAGCACTGAACAGATGAAAGAGAC    | 17680 | A_95_P288078 FG139528     |
| 18318 | 216 | 43 | 680  | GGAAGGTTTAGTCATCAATCACTTAATTAAGTATGATGCATCTATGCTCCACATTGCTTA | 17688 | A_95_P151642 EB681893     |
| 18319 | 216 | 44 | 955  | GCATATCTCCAAATTCATTCCAGACTGTTGCTCGAAGCTATGTATTGACAGCCCTT     | 17690 | A_95_P204337 TA18044_4097 |
| 18320 | 216 | 45 | 667  | CGGAACCTACATTGGTTGAGTCGTAAGATGATGACTATTATGACTTTAGTATCTC      | 17692 | A_95_P188902 TA14675_4097 |
| 18329 | 216 | 54 | 457  | AAACGCTAGAATAAAATAGCTTTAGTCAAGGTTTGAAGTTCCATTGATGTTTTCGGC    | 17710 | A_95_P209662 TA19238_4097 |
| 18331 | 216 | 56 | 1826 | GCAAGGTTATCATCCTTGAGTCTTAACAGGGGAAATATTGGCTAGATTTTTTGGATT    | 17714 | A_95_P004586 TA12215_4097 |
| 18336 | 216 | 61 | 791  | TTTTCTGGAATATCTCAACAGTTGCTAGCCGTCGCAAGCATGTCTTATGGGTATGAT    | 17724 | A_95_P298623 FG148948     |
| 18339 | 216 | 64 | 660  | GACAAAGCAACATATTTCTGTTAGTACTTCTCTTTCTGCGAGTTTTTATCGCAACCTT   | 17730 | A_95_P028766 DW005049     |
| 18342 | 216 | 67 | 906  | GCATGTACAATAAAAATGACATATATTGCATTGCCCTCTACTTTTTTGGCTTGTGAC/   | 17736 | A_95_P183002 TA13354_4097 |
| 18346 | 216 | 71 | 93   | TATCTAGATGAATTATCCCTATAGAGGAATCATCGTGGCGCATGAGGAGGAGGAGG     | 17744 | A_95_P141122 EB444915     |
| 18351 | 216 | 76 | 791  | GCAGGCTGAAAAGTCTCTCAATAGAATTTCCCTTTTCTCTTATGCTGTTTTTCTCCT    | 17754 | A_95_P265876 EH616818     |
| 18355 | 216 | 80 | 870  | CCTATCCCCTCTGATGATGCTGGGAAGGAGGAAGTAAATGCAGCTTTGGTTACAAAT    | 17762 | A_95_P227144 DW000809     |
| 18357 | 216 | 82 | 767  | GTTGGGTGTTGCCAATATCTCCATAGAATATTTATTGAAAAGCCTTGTGTTGATTGG    | 17766 | A_95_P162207 EH621097     |
| 18358 | 216 | 83 | 867  | TCTGGAAATTTGTTTGAAGCAATAGGAGACGCTGTTGTTGGTACTAAAGGGAAAA      | 17768 | A_95_P219092 EB447431     |
| 18359 | 216 | 84 | 681  | TGTTGAGCTTACATCCAATCCAGGTTCCAGATTCTGATATTGGATCACACTTTGGCA    | 17770 | A_95_P144937 FG157727     |
| 18361 | 217 | 1  | 871  | ACACTCAGAGCGTCTGATGTAATGGCTGTGCTATCTTAGTTGGATATCGAGTTAATTA   | 17773 | A_95_P016176 DV158991     |
| 18362 | 217 | 2  | 451  | GAAGTTGGAGATGGTGGGCTGGTGATGATAATCACATTGATACTCATCCTGCTGTT     | 17775 | A_95_P071590 EB424987     |
| 18363 | 217 | 3  | 868  | TTCATTGCAGATCGTTACTCATCATAACCATTGCTGCTGAGTATCATGTATATGAATI   | 17777 | A_95_P217002 EB682225     |
| 18372 | 217 | 12 | 1396 | CTTAATTTCAAAGTGACCTCCGAAATTTATTTCTGATGTCCCGTATACAAACAAGTTC   | 17795 | A_95_P007521 AF321140     |
| 18374 | 217 | 14 | 845  | AGCTGTCTAAGCTCGTTCTATTTCTGTCATACTTATATGCTCAATGATGGCAATCAT    | 17799 | A_95_P229569 DV159750     |
| 18376 | 217 | 16 | 815  | ACTTGAATCTTTACCATCACTGATGAAGAGTGACTGCATAGTAACTTGATTGTGGCC    | 17803 | A_95_P268026 DV999271     |
| 18377 | 217 | 17 | 500  | GGATATGATAGATGGGAAATAATGTAGAATAAGTTATGGACTCAACGCCTCGGAGT     | 17805 | A_95_P123597 DW003466     |

|       |     |    |      |                                                             |       |              |              |
|-------|-----|----|------|-------------------------------------------------------------|-------|--------------|--------------|
| 18378 | 217 | 18 | 815  | GAGACAAGAGGATTATGAGAGAGAGTTTAATTTTAGATTTCGAGGAGAATGCAGGGC   | 17807 | A_95_P149077 | EB678729     |
| 18379 | 217 | 19 | 892  | CAAAACAATCATGTCCGAGAGTTAGGTAATGCATACAAGATATTGCTGGCCTTTTCA   | 17809 | A_95_P282893 | EB680466     |
| 18382 | 217 | 22 | 807  | ACAGATTATCCAGAGAGCCGCCAAGTTGTCCGATTCCACTCCCATTACATGACATTT   | 17815 | A_95_P230714 | FG157344     |
| 18383 | 217 | 23 | 582  | TGGCTTTATTTGGGACTGAGGCGTAGTAGTTGTTGTATATGGCCTTGTATTTACACA   | 17817 | A_95_P140137 | EB444089     |
| 18386 | 217 | 26 | 821  | GGCACATGGGGATATGCAAAGTATATCCATTTGCAATGGAATATAATTTGATGCTAT   | 17823 | A_95_P250077 | EB450661     |
| 18395 | 217 | 35 | 630  | CTAGGAAGAGGTTATCCAATCATTTTGTAAAGCCTCTTTGTAGTTGAATTTTTTTGGC  | 17839 | A_95_P207267 | TA18703_4097 |
| 18400 | 217 | 40 | 68   | TATCCTATGCGCCGACGTATTTTCTAGTTTGGATGCTTGCAACAACTTTTCTCATGC   | 17849 | A_95_P032141 | CV021711     |
| 18405 | 217 | 45 | 442  | CACCTAGTATTTTTGCCTCTCTTGGATTTGGAGTTGCAGGGCTTTATTCTATCAATAT  | 17859 | A_95_P141042 | EB444843     |
| 18407 | 217 | 47 | 899  | TACTTCTAATGCTTCTGGTTCATTATTGGCAAGCTACCTCTGCTGGACCGGTACT     | 17863 | A_95_P217522 | DV162291     |
| 18410 | 217 | 50 | 1342 | AGACTTTGTATCAGAGATAGCTTGTCCGACTGGCTCAAAGTGCTACACAGAGGCAA    | 17869 | A_95_P199442 | TA16995_4097 |
| 18417 | 217 | 57 | 836  | AATCAGAAATTAGCTCATCCAGTGATGATAGGCGGAGGAAGAGGAAGAGATCTAAA    | 17882 | A_95_P027476 | EF051139     |
| 18420 | 217 | 60 | 2363 | CGGACACACACAAGATGTTGTAAGTTGTTGTTGGACATCGCTAATGTCTATTTGCCTT  | 17888 | A_95_P210327 | AF435452     |
| 18423 | 217 | 63 | 829  | AACCTGCACACAAGAGACAGCGCCAAATTTCCAATGTTGAAGGTCAGTACTCTTTGT   | 17894 | A_95_P121927 | DW002005     |
| 18425 | 217 | 65 | 678  | ATTGTTCTCAATCATGTGTATAACAAGCGGAAGCTACAGTTGTTTCGGACAGTGGA    | 17898 | A_95_P291173 | TA20561_4097 |
| 18431 | 217 | 71 | 522  | CCCCACCGCCAAAGAAATGAAAAATGAAATCTGGTGAAGGATTTGAATGAAGCAA     | 17910 | A_95_P124537 | DW004346     |
| 18433 | 217 | 73 | 495  | AAGCTTCAGATGAAGGTCTAGAAGGAGTGAGTGGTGAAGAGGAATCAACAGATGA     | 17913 | A_95_P052061 | BP132816     |
| 18434 | 217 | 74 | 685  | GACAACTAACTGTATGCTCTTGATGAGTTGATTGAATGATAAATGATGAGAAGGG     | 17915 | A_95_P014136 | TA18995_4097 |
| 18435 | 217 | 75 | 589  | GGAGGAGCTTGAAGCTAAGGCACTCAAATGTTTTACTTTTTTGGTTATATATGACAA   | 17917 | A_95_P268631 | EH615283     |
| 18436 | 217 | 76 | 176  | ATGACTTCTGCTGCTATGAAAGTTCAAACGCCGCTTGTGTTGTGAAATTGCCTTTAT   | 17919 | A_95_P034134 | AJ718198     |
| 18438 | 217 | 78 | 703  | TTTGATTAACCTGTTTTAGGAGTTGGAAGTATGTTGTATCACTAATAGATGAGTTGCA  | 17923 | A_95_P146267 | EB450252     |
| 18443 | 217 | 83 | 1069 | AGTAGTCAAGCTTACACATAGTAATGTGCCGGAGGAAGACAGATATGGAAATGCAA    | 17933 | A_95_P034549 | TA15200_4097 |
| 18449 | 218 | 4  | 706  | CTTGTTGATGTCATGTTGTGAATTATGAAGATGGTCATGTATAAATGCCTCCAAATGA  | 17780 | A_95_P116512 | DV159279     |
| 18451 | 218 | 6  | 208  | AGCGGAGGAGGCAGAGGTGCTGGAATGAACATTCAAGACATATTTAGCCAGTTTTT    | 17784 | A_95_P176222 | T18328       |
| 18457 | 218 | 12 | 264  | CTTTTGGCTTCTATTTGCTGTTCTGCTGTAATTATCCATTTGTTATTGGTACCGCTGTC | 17796 | A_95_P009706 | TA13806_4097 |
| 18464 | 218 | 19 | 1289 | GAGCTCAAAGACTCTCTTCTGTTTGTATAGCTTTAAATGTGTTTTCGTACACTTTTTGG | 17810 | A_95_P192732 | TA15518_4097 |
| 18465 | 218 | 20 | 405  | AGACGAACAAGGCAGTTCAGATTGTCTCTCCGTTGCCAAGGATTGCAAGAAACAGA    | 17812 | A_95_P083420 | BP528755     |
| 18466 | 218 | 21 | 494  | TCACAAGTTATTATGACTCTGATGTGACGGTGAATCTTACTTTTCCAATGAATTTGCT  | 17814 | A_95_P281278 | AM821017     |
| 18472 | 218 | 27 | 738  | GTGTTTCAGCTTCTTGATTTCCGGTTTGATGTTGTTCTATCACTTTACCGGGTCGGGTC | 17826 | A_95_P128397 | EB428100     |
| 18477 | 218 | 32 | 115  | GAAGAAGATCTAGAGTAAGTAATACAAGAAGAGGAAACCGCCATTTGGGTTATGAT    | 17834 | A_95_P030601 | BP532130     |
| 18478 | 218 | 33 | 1035 | GTGTTGGTGACTTTGCTCGTATTTATAGTCTTATTTGCATGTTGCGTAATCATCTTTGT | 17836 | A_95_P008136 | AB119480     |
| 18481 | 218 | 36 | 509  | CTAGGTTGAACTTTATCTTACTGTTCTCCTACAAGAAAATCATGAAATCCGTCTCCTTT | 17842 | A_95_P061355 | EH623004     |
| 18482 | 218 | 37 | 273  | GATGGTGTGTTGCATTCCAACAGATCCACTTCTTTACCTTCAGATATGCATGTATCTTC | 17844 | A_95_P095143 | BP533037     |
| 18501 | 218 | 56 | 1174 | ATAAAATGGGAGTCATTCTTCTTTTATTGTGAAATAGTAGTACTTTTGGTTCCCC     | 17881 | A_95_P007656 | TC40222      |
| 18502 | 218 | 57 | 719  | TCGTCAAGTTGTCAGCAAATGGCGTGTGATTCTGAGAATTGATAAAAGTGTAAATCGA  | 17883 | A_95_P310573 | FG136991     |

|       |     |    |      |                                                              |       |                           |
|-------|-----|----|------|--------------------------------------------------------------|-------|---------------------------|
| 18503 | 218 | 58 | 523  | CACTTGGAATGCAAATCAAGGTTGGGTTGCTCCAACAGTGAATATGGGATCAACTG     | 17885 | A_95_P083950 BP528896     |
| 18506 | 218 | 61 | 754  | GCTGTGATGAGAAGTACACAGCGGATATCTTGTTTCATTGAATTTAATAGTAAGAAT    | 17891 | A_95_P252674 EH623728     |
| 18507 | 218 | 62 | 601  | AGACTCGTGACACCAGATTGTTGGGTTTATGTAGTTTATTGTTATTTGACTTTCCGC/   | 17893 | A_95_P157367 EH615412     |
| 18509 | 218 | 64 | 500  | CGTTATACATTGTCTGGGTGTTTAAACGAACGCTTTCTAATATGGTTAATTTCAAGTTG( | 17897 | A_95_P293783 EB437715     |
| 18515 | 218 | 70 | 539  | AGGCTGATCAATATTTGAGATTAGAGCGTTGTATGGTTATGTACAGAAGTTGGTATA    | 17909 | A_95_P124802 DW004605     |
| 18516 | 218 | 71 | 1707 | TACATGGGTCGTATCAAAAAATTGCAGGAGTACCTGACAAGGTGCGCACAATTGTG/    | 17911 | A_95_P170556 TA15521_4097 |
| 18522 | 218 | 77 | 713  | GTAGTAATGCTTAATGGATGTACACTTTTTGGTGGAAGAGAAAAGTGAACATTAAC     | 17922 | A_95_P155577 FG642423     |
| 18523 | 218 | 78 | 873  | AGTATGCTTCTTTGCGTGCAGAGCCAGATTTCAAGTGTGTTAGGAAAAAGGCTGGGA/   | 17924 | A_95_P119032 DV162127     |
| 18526 | 218 | 81 | 623  | ACTTTCACCTCTATCCTGGATATGGCTGGAGTTCCTTGCCATTCTTGAAGTGGGTCA    | 17930 | A_95_P121312 FG161763     |
| 18532 | 219 | 2  | 0    | TTATGTGAGCATGGGGATGTTTCAGTGAGCATTCTGGAAGTTTGGCGGACATTGGA     | 17940 | A_95_P248222 A_95_P248222 |
| 18536 | 219 | 6  | 760  | CTTTGAAGCGGCATACACTTGTCTTACGGAAAAGAGATAATGCGGAGAAAAGCA(      | 17948 | A_95_P208652 TA19015_4097 |
| 18539 | 219 | 9  | 414  | TGTAACAGGGCTGAATTTCAAGACTCCTGTCCAAATTTGAACTAAATGATTTATAGA    | 17954 | A_95_P099663 AM828280     |
| 18540 | 219 | 10 | 637  | GAAAGTGTATTTGGGAGATGAGTCTAAGCCTAATGCCCTGCTGGAAAGAGCAATG/     | 17956 | A_95_P138817 FG145780     |
| 18543 | 219 | 13 | 811  | ATTTTTCTTTCATGTGTTTGTCTGGGATAACAGCCTCGTTATGCGGTGGGGAAGCAT    | 17962 | A_95_P136962 EB440696     |
| 18545 | 219 | 15 | 753  | ATCAATCCCCTGAACTCGATCAGAAATCCCCTGTCAGTGGACCTTCTTTTGAAGG      | 17966 | A_95_P000116 FG157904     |
| 18548 | 219 | 18 | 745  | CTTGTAAGAATGATGATGATGCTCTGACTTCTAACTGGAAACGACTCCTGTAAATAC    | 17972 | A_95_P206587 TA18550_4097 |
| 18550 | 219 | 20 | 1227 | CAGTCATTGTATTGTTGAATGACAGGGATAAGAAATATTCCTCAATTGTACGAACTAC   | 17976 | A_95_P010081 TA14849_4097 |
| 18552 | 219 | 22 | 0    | TGTATGTTTGGACTGAAGAAATGTCCAATACTTTGAATTTCACTTACCTTATCCATCTG  | 17980 | A_95_P304773 A_95_P304773 |
| 18553 | 219 | 23 | 1758 | TACAGAAGAGCTGTTGGCAGCTCCCTTAACTCAGAACTATTCAGTAATTCCTTTTCT(   | 17982 | A_95_P221947 X92967       |
| 18554 | 219 | 24 | 2455 | TCTGTTAATTAGCCAAAATTCCTGTTACCATGGGCAATGAATTTGATTACAGAACT     | 17984 | A_95_P190327 Y11996       |
| 18555 | 219 | 25 | 1735 | CATTGTAAGCAAATGGTAAAGTCTTCTTATGTAGGATTTTGGTTCTTTTCCAGGAA     | 17986 | A_95_P182027 TA13117_4097 |
| 18558 | 219 | 28 | 684  | TAATCTACTATTGGAAGCTGCAGCTGCAGTTTTGTCTCGTAGTTCCTCTAGTATCATT/  | 17992 | A_95_P232364 DW002772     |
| 18559 | 219 | 29 | 728  | CGTCCACTTGTAGGCTTATGTGTTTCTTGTTTACACCATATATATAGGGTATTTTCCC   | 17994 | A_95_P161307 EH620045     |
| 18560 | 219 | 30 | 1352 | GACCCAGTCTTTGCAACTCTGGATATGTTTCTTGTTTGTGTTTATGAATGTGTAA      | 17996 | A_95_P009326 AJ133422     |
| 18561 | 219 | 31 | 827  | ATTTGGTGATGAAATCAAATTTTCAATGCTTTTAAATGATGCAGATCTCCTCTAGTTCCT | 17998 | A_95_P187057 DV159114     |
| 18563 | 219 | 33 | 364  | ACGCACCTCATTGGTGTTAGTGAACCTGTTTTATTGATTGAGATTTCTCATCATCTA    | 18002 | A_95_P130372 FS429628     |
| 18567 | 219 | 37 | 801  | TCTCAGGGCAAGAATCGTGAACAAAACAGAATGCACCTTGTAGCTGGATTTCAAGGTC   | 18010 | A_95_P272596 EB451374     |
| 18568 | 219 | 38 | 102  | GGTTTTACTGAGTGTACATGCTCAAAGATGGGTTCTATGCATTGCCCTCTTTTGT      | 18012 | A_95_P120792 DW000751     |
| 18570 | 219 | 40 | 3102 | GGGCAGTTGTCTACACAAGAATGTGTTCTTTGGTTTCAATTGTATCAAGAGAAATCA/   | 18016 | A_95_P025156 AB032541     |
| 18572 | 219 | 42 | 918  | AGACTCCTTACCAAAAACATATCTGACTTATTATAGGTGGCAGTTAACCTTGTCT(     | 18020 | A_95_P015726 TA15561_4097 |
| 18580 | 219 | 50 | 792  | GCACTCTGGATAGTGGAAAAACATCTTCATTGCAATGAGTCAAATATTAGAAAAGG     | 18036 | A_95_P216017 TA20613_4097 |
| 18581 | 219 | 51 | 839  | TGAGAACAATCTTCTAGAGGCCGGGATTTACATTCATTTCCCGCTGAGCTGTACTA     | 18038 | A_95_P284758 FG159803     |
| 18583 | 219 | 53 | 860  | CTGCTTGCTTGTGTTGTGATGAGCTTGTTCATATTACAATATTTATAGTTGAGTTGC    | 18042 | A_95_P014681 EB679140     |
| 18585 | 219 | 55 | 1138 | CATCCATCCTTGCATAGTCTGTGGAATGGCTTTGTATTCTTAGATTTAATGAAATG/    | 18046 | A_95_P008506 TA14305_4097 |

|       |     |    |      |                                                              |       |                           |
|-------|-----|----|------|--------------------------------------------------------------|-------|---------------------------|
| 18587 | 219 | 57 | 685  | ATTGATCTGCCAGCAAGCTGATGAAGTTAGTAAACTTGGGGGTCCTCAAAGTAATC     | 18050 | A_95_P164527 EH623769     |
| 18589 | 219 | 59 | 166  | CTCGTTTGCTAGCAGAGGATGGTATGTAATGAAGTATTTCTTTGATAACAGTAGTCA/   | 18054 | A_95_P141642 EB445312     |
| 18594 | 219 | 64 | 661  | GGGGGACTTTGTGGAAAGTGAAATATGTGAAATGTAAAATCTACAACCTCTGGGA      | 18063 | A_95_P214612 TA20299_4097 |
| 18597 | 219 | 67 | 327  | GAGATGCAGCAACCACACTTTCATCAAGTTCTACACAATCAACAAAAGAATGCGATT    | 18069 | A_95_P086090 BP529450     |
| 18598 | 219 | 68 | 684  | GCTGAACCACAGGCTGCAGAAGAGACTCAAGATTAGTCATAATTATGAAAATAGTGT    | 18071 | A_95_P126982 EB426388     |
| 18600 | 219 | 70 | 86   | TTCCACTACTTGTGGAAATGGATCATTGTATCAATCGGAATTGCTATCCATTGTTAGT/  | 18074 | A_95_P030111 CV016797     |
| 18611 | 219 | 81 | 1714 | GTGTCTCTAGCAATGCCAACTTCTCAGAAGTAATAAAAAATGTATTGATGAACCTC     | 18096 | A_95_P014366 TA15877_4097 |
| 18615 | 219 | 85 | 389  | GGCGACTAGCAGTTTCATTCTTACTGGATGTGTTACTTCTTTGATTTCTTTGTTAGAAA  | 18103 | A_95_P219892 FG641158     |
| 18618 | 220 | 3  | 671  | TGCACCTGGATTTTGGGTTGGAGTTTCAAGTTTGTGAAACCAGCAGGAAAACATAAAGC  | 17943 | A_95_P253524 FG641440     |
| 18627 | 220 | 12 | 687  | AGGGCTGTTATAAACTCTCCATTTGATCTGCTTTGCTTCTCTGCTTCTGCTTCTTTGT   | 17961 | A_95_P135692 FG643304     |
| 18628 | 220 | 13 | 1151 | CAATGGTTATGGTAGTGTATAAAACAAAACCTGGCACTGTTTGCAAATTGCAAATAAA   | 17963 | A_95_P200302 TA17179_4097 |
| 18630 | 220 | 15 | 641  | CAGGAGACTGAGTACATGAGAGAATACTATCAGTATGTTATCTATTTTCTCATTAACC   | 17967 | A_95_P137532 EB441250     |
| 18631 | 220 | 16 | 420  | AGTAATAGCTTGAAGGCCTCAAGGTTTCCCTTTTGTGCTGTTGTTATGGCTGCGACAA   | 17969 | A_95_P014426 AY740530     |
| 18632 | 220 | 17 | 809  | GGTTTTCTTATTAATGACATCTCATTGTCAACAATACTTGTGGGTCAGCTACCACATTC  | 17971 | A_95_P003841 DV162691     |
| 18636 | 220 | 21 | 717  | GAAGGTTAAGGTAAGACATTTGGTTGATGATAATAAGAAAAGGTCACGTTCCCTTTC    | 17979 | A_95_P149897 EB679885     |
| 18637 | 220 | 22 | 867  | TCTTGACTTTGAGACTTGTCTGTTCAACAGTATCCCTTCAACAACAACCAAGCTAT/    | 17981 | A_95_P229314 DV162045     |
| 18638 | 220 | 23 | 423  | TATTTGTGTCGGATTTTGGACCTCAACCAGAGAAAAGAGAAAAGAGAAAAGAGTGGG    | 17983 | A_95_P122922 DV999293     |
| 18641 | 220 | 26 | 1300 | ATCCATTTGTGCTCAAAACCAAGGGACCAGATGTCAAGCAATGTGGACTTAACTGCT    | 17989 | A_95_P197492 TA16572_4097 |
| 18646 | 220 | 31 | 151  | CACTTGGCTTGAAGCTTTGAATTCCAAGTTTGAACCCTAAATTGGCAATTGCTTAT/    | 17999 | A_95_P006626 CV016052     |
| 18648 | 220 | 33 | 480  | GAGAGATCGGCCTGGCATATAAATGAGGAAAATCTCTCTTTCTCTCTCTCTCTCTC     | 18003 | A_95_P095238 BP533092     |
| 18649 | 220 | 34 | 911  | CGTGTAGGCATTTGAAACAACAGTTTCTACTGTACTGATATGTCATTTGTAGTTATGAG  | 18005 | A_95_P003961 EB425137     |
| 18651 | 220 | 36 | 126  | TCCTCTGTAAGTTTCTTTATTAATGTTTTGGTCATACACCCAGAGCAATGTATTTGTG   | 18009 | A_95_P066045 AM819908     |
| 18652 | 220 | 37 | 924  | AAAGAACTGTCGAAAGTTTGAAGGAAAAAAGGTTTTTTGGAGGCTCATCGGCTATC     | 18011 | A_95_P240394 AY911855     |
| 18654 | 220 | 39 | 265  | TCTCCACTGTAAGTGTCTACACCACAGGCCCATGATTTGTTTCTAAATATAAAGTAAA   | 18015 | A_95_P033774 AJ632967     |
| 18658 | 220 | 43 | 418  | ATTAATCAAATGCTTAAACTGGAATCGCGGAAAGAGCTCATGTTGGTGATTCTCTC     | 18023 | A_95_P076970 BP527130     |
| 18659 | 220 | 44 | 662  | GTGTTGTCGAGATTTTATGCCGTGGACAAAGCAACACTGTGGAGATTGTATTTCTAC/   | 18025 | A_95_P287863 FG198220     |
| 18660 | 220 | 45 | 675  | GCCTTGTCTGAAGTGTTCGTACAACAATTTTGTGAGACCAAGTGTTATTACTGT       | 18027 | A_95_P004076 TA12299_4097 |
| 18661 | 220 | 46 | 769  | GGGGGTTGTTGATGTTAAAAATGGACATTTATTATTCTAACTTATCATGTGTTCTAC    | 18029 | A_95_P238694 EB449711     |
| 18662 | 220 | 47 | 592  | GTATTTGCTTTGGTCTTTACATCTTCTAGGTGTAATTTGGTAAATGGATCTCGACCAG/  | 18031 | A_95_P209447 BP130751     |
| 18666 | 220 | 51 | 1391 | GAACATAGACTGCAAGTTGGCATTATTGTTCTGTGGACCAAGTCCCCCTTCCCCAAA    | 18039 | A_95_P024876 TA16043_4097 |
| 18669 | 220 | 54 | 627  | CTTTGGGCTTAGTGCTCATTCTGCTTACCTATCTTATGTATGCAATTTAAAACGTTT    | 18045 | A_95_P001661 EH617929     |
| 18676 | 220 | 61 | 166  | CCATCGAGGTCCAATCCCTTCTATTTTATCTTGAATCCTTTGATTTTATCATTGAGATTC | 18058 | A_95_P134372 EB436614     |
| 18677 | 220 | 62 | 372  | AATTTTTACGGTGTGGCTAATTTAATTCTAAAAATTAGCTGGGGGTGGCGGGCAGAA    | 18060 | A_95_P104982 CV017249     |
| 18683 | 220 | 68 | 765  | GTTTATAAGGGTTTACTGTAAGGATTTATCTGTTGGGGTTGGGCCAATAAGTCGTC     | 18072 | A_95_P028361 EB426542     |

|       |     |    |      |                                                               |       |                           |
|-------|-----|----|------|---------------------------------------------------------------|-------|---------------------------|
| 18686 | 220 | 71 | 815  | CCTTTGATGTTTTGGATGCTCCAAGTTATTTGGTGTTCATGTAATACATGTATGTTAC    | 18077 | A_95_P283613 FG638542     |
| 18689 | 220 | 74 | 403  | ATCTTCTGGAGTAGAAAATATTTACAAGAAGCTTTACGCATCGATTCTGGAAATGTA     | 18083 | A_95_P065415 BP136325     |
| 18690 | 220 | 75 | 847  | CATCACTTGGCGAAATTCAGTTGATAACAACGAGTATTTGAGAATAAAGGCCGTGAA     | 18085 | A_95_P148597 EB677958     |
| 18691 | 220 | 76 | 1019 | ATGAAGTTCAGCTGCTTGTAAAGATACTCTTTATGTTCTAATGCCTAATGGACTGAA     | 18087 | A_95_P023751 TA16718_4097 |
| 18692 | 220 | 77 | 1823 | GCTCCCTTAACTCAGGAACTATTGCAGTTAAGCCAATTAGAGTTGAGATAATAACA      | 18089 | A_95_P217622 X92966       |
| 18693 | 220 | 78 | 196  | ATCAAGGACTCGGTGCGTTCCTTTCTCCATGTGAGAACTGTGGTACTCTAGCTTAC      | 18091 | A_95_P040286 BP129787     |
| 18695 | 220 | 80 | 105  | TACCACAATATCTGTCGGTCTTATAATTTGTGTTGGCAGGAAGGGATTTGTTAAATT     | 18095 | A_95_P023186 EB445368     |
| 18696 | 220 | 81 | 540  | TTCATGCTCGTTTTCATGCCCGTGTGGGATATCTTAGCATTGAAGAAGAGATCAGAG     | 18097 | A_95_P108267 CV018754     |
| 18702 | 221 | 2  | 715  | TCCAGCACAAACATTGTGCATGCGAATACAATGGATGGCTTTATCATCTTTCAGTGTT    | 18107 | A_95_P181882 EH623509     |
| 18704 | 221 | 4  | 0    | TGATCACATTTTCATGTGTGGTATCATTGTGGTACGTGGTGTACTCGGATTACGACTC    | 18111 | A_95_P292023 A_95_P292023 |
| 18706 | 221 | 6  | 832  | AGATACATTTGTGTTCTGTGCAGCTGTCTGTTTCAATAGCTGGCTTCTTTTCTATTTCT   | 18115 | A_95_P266946 DV157514     |
| 18707 | 221 | 7  | 882  | TGCAAACTATGTGAATGGAGTTGTTGGTAAAGGGTGGAGCTGTGTATAACAAGCATC     | 18117 | A_95_P230484 DV158244     |
| 18712 | 221 | 12 | 839  | TGATAAAAAGAAGAAGCATCCCTCGGAACTGGCGATCCTGAATTTCCAAAAGCTATTT    | 18127 | A_95_P292748 EB428339     |
| 18714 | 221 | 14 | 1507 | ATTTGCTCATGGAAATCCTTGCTTGGTAATGATTCTCTACTGAGTTACCTTTCTATTCT   | 18131 | A_95_P027281 TA14519_4097 |
| 18716 | 221 | 16 | 856  | GAGATTGAAGTAAACTACAGTTTCAGATTTTCTTGGTCATTTGACATGCCATTCCGAA    | 18135 | A_95_P183252 EB678237     |
| 18717 | 221 | 17 | 196  | ACAGAATCGAATTGCTCTGTCTCAAGTTGAGGGAAAAGACATCACTGAGCTGATTG      | 18137 | A_95_P104622 FG645200     |
| 18722 | 221 | 22 | 597  | CCGCTATATATGGAAAATCCAAAGTGGGAGCAACACATGCTATGCCAACCAACTGGC     | 18147 | A_95_P171786 EH665222     |
| 18725 | 221 | 25 | 724  | AGAGTATAGGCGTTTCTTGAGTTCTCGACTTGAGCTTATTTTCTTCTATTTCCCCCT     | 18153 | A_95_P120387 DW000280     |
| 18730 | 221 | 30 | 127  | GTACGAGTGTTGGGAACTGCATGTTACAATAAATGTATGATGGTAGTGTGTTGAAATA    | 18163 | A_95_P154867 EG649789     |
| 18732 | 221 | 32 | 372  | GAACTAAGGGATTCCACCCTTAATATCAAATAGCAATGGAAGTATTATGTCTGGATA     | 18167 | A_95_P110477 CV019747     |
| 18734 | 221 | 34 | 230  | ACCTCATGCTGGCTGTCTATTACCCGAACTCAGTGATAAAGAAACATCGTTGATCCAG    | 18171 | A_95_P111172 CV020081     |
| 18735 | 221 | 35 | 0    | CAAGTAGAACATTGTTGTTGGTCAGGCCATGTATAAGCATTGAAGCTTGGGAAAGTC     | 18173 | A_95_P247642 A_95_P247642 |
| 18737 | 221 | 37 | 1509 | GAGCTCATTCTATGCCTTAAAACTACTACTAGATAACTGCGTAGTAAATAATGCTTG     | 18177 | A_95_P255199 DQ350357     |
| 18738 | 221 | 38 | 798  | TATGAGCCAGAGGGCAAATGGATTTAGCAATGAATACATAGTGGTTACAATCTTGGT     | 18179 | A_95_P229694 DV159967     |
| 18739 | 221 | 39 | 257  | CGGTCTATCCGCCCTTAAGTGGTATTACCAGCCATTCTGGAGAAGCTGCAAAAATAA     | 18181 | A_95_P034688 AY237826     |
| 18741 | 221 | 41 | 1235 | CGGAAATGTAACCTGTTCTGGTTATGCCATTTCAATTGTATCATATTGCCTCAACTATTAC | 18185 | A_95_P209922 TA19291_4097 |
| 18742 | 221 | 42 | 699  | AATAGGTCTGATTACGGAAAAAGCACTTCTTCCCTCCCCTAGTCCATTGTACAGTCCCT   | 18187 | A_95_P137627 EB441351     |
| 18746 | 221 | 46 | 568  | AAAGTTAGGCATTACAGAGTAAACATAGATGGCAATGTTTGCCTGTCATGGTGACA      | 18195 | A_95_P132567 EB433069     |
| 18749 | 221 | 49 | 1124 | CATCTCAGAGGTTTTGTGTAATACAATATATTGTGCAACTTATCTTGCATAGGGAACA    | 18201 | A_95_P007846 TA12488_4097 |
| 18750 | 221 | 50 | 139  | TAAGGTGAAGCATTACGGCACCTTGTGAACGTCTCTGCTTGTGACTATGCTTTG        | 18203 | A_95_P104822 CV017186     |
| 18752 | 221 | 52 | 479  | CATGCCCTAGTAATTTAAGTATTTAACCCCAAGGAAGCAATATTCGTATACTTGTAC     | 18207 | A_95_P273371 EB684268     |
| 18756 | 221 | 56 | 1398 | CTATTTTTTATAAGAGGAGCGACACCAAATAAATAGAGAGGGGCGGGGGGAGAG        | 18215 | A_95_P122572 DW002555     |
| 18758 | 221 | 58 | 864  | TCATATAGTTTCTGCTGATGTACGAGGAACTCATCGTCAGTTGATTGTGGAAGTGTGT    | 18219 | A_95_P310953 FG144423     |
| 18760 | 221 | 60 | 502  | TTGTTCCGCACTGGGTGGTTATATTTTTTCTCATTCCCGTTATTGCATTATGACGTGAA   | 18223 | A_95_P266221 FS391824     |

|       |     |    |      |                                                             |       |                           |
|-------|-----|----|------|-------------------------------------------------------------|-------|---------------------------|
| 18763 | 221 | 63 | 456  | TGTCCTACAGAACTGGGGGATCTTATAGCAGCATATTCAAATAATCTGCTCAAGAGC   | 18229 | A_95_P072340 BP525938     |
| 18764 | 221 | 64 | 390  | CTGCTTCTCAGAATTTCTTCCATTTGCAGCATCAAGCAGTCAAGAATTTGGTGGTGG   | 18231 | A_95_P148907 EB678463     |
| 18767 | 221 | 67 | 1183 | ACAATACCAGCAATCAAATCCAGTAGACTTCTTGGCGAGCGACCAGTTCAATCTTTCA  | 18237 | A_95_P018251 TA17597_4097 |
| 18769 | 221 | 69 | 743  | CTTGAAGATAGGAAAGCAGTGGATAAGAGAGTGAGAGTCAAATGAGCTTGATCTG/    | 18241 | A_95_P298303 FG146934     |
| 18771 | 221 | 71 | 23   | GGAACCGTAAATTTCCATTTTGGTTGGACTACTACTATCAATTTTATCGGTTTGGCTT  | 18245 | A_95_P110127 CV019594     |
| 18775 | 221 | 75 | 780  | GAAGCCGGATATTGTTGTTCCAGGGAATTTGGGCTTGTGTGAGTGAAGCATATGATCG  | 18253 | A_95_P194402 TA15886_4097 |
| 18777 | 221 | 77 | 783  | TCAATCATTGTTGCATCTGCTTCTGTGTCAAGCCAGAAGGGAGAACTAATGCTGAC    | 18257 | A_95_P305108 FG136365     |
| 18782 | 221 | 82 | 754  | TTTGCCTGTTGCTGCACCTATAGATGAAAAGATCCTTTCATGCATGGTGGTCTTCTC   | 18267 | A_95_P118372 DV161400     |
| 18786 | 222 | 1  | 242  | CAGGCATATTTGTTTTAATCAAGAAGTAAAAGGTTGTGGCTGGATAGGCCAGCTG     | 18106 | A_95_P062200 BP135456     |
| 18787 | 222 | 2  | 600  | TGTGAGTAACTTTATTTGTTGTGTGATTTTTCATTCTTGTTTTTGTCATCAGGGTCTC  | 18108 | A_95_P123337 DW003204     |
| 18789 | 222 | 4  | 1950 | ATGAAGACTGCAGACACTGAAGTAAAGAGCGAAACTCTTGCAAATGCTGTGCACCGC   | 18112 | A_95_P233144 U01961       |
| 18791 | 222 | 6  | 830  | AAGTAAATAGTTCATGGTTATGCAGTGTAGTTCGGATTACTTTAGGGGCTACCTCGG   | 18116 | A_95_P013376 EB424705     |
| 18795 | 222 | 10 | 113  | AATCTCAGAGGGGTGGTCCGATTACTTGCATGGCCAGTTACAAAGATGCAAGCTTAT   | 18124 | A_95_P108507 CV018866     |
| 18799 | 222 | 14 | 2458 | TAACATGTGTTGATGATTCCAGCTCACTTGTATAATTATCAATTCGCTCTCCCTCTA`  | 18132 | A_95_P027611 TA12261_4097 |
| 18802 | 222 | 17 | 0    | GTATCATTGTTACCGTGGTTGTACTTTGATGTACGACTCTTGTAGCTGTTTCTTGACTC | 18138 | A_95_P242107 A_95_P242107 |
| 18805 | 222 | 20 | 438  | TTTCTCACTGTGGCCTATGTATTGTTGGTGTATATGCAAAATGTAAAAGGGCACATT   | 18144 | A_95_P025211 TA17662_4097 |
| 18807 | 222 | 22 | 1394 | CAGGATACCTGCAATAGTTTCATGCTGAGTTGTATATATGATCTCTTCATTTTCCAAG/ | 18148 | A_95_P031151 AF211537     |
| 18808 | 222 | 23 | 779  | CTAGAACTTCTGCAGAAGACATGGAAGAAATGTGGAATCATCCAGTGTGAGCAAGC    | 18150 | A_95_P233374 DV161185     |
| 18810 | 222 | 25 | 293  | TGATGGAAACTAACTTGATGATGACCAAGATGGCTGATGGCTTTGTGCTAACCTGAT   | 18154 | A_95_P110482 CV019749     |
| 18815 | 222 | 30 | 409  | CACTTGAGGACATTGAAAAAAGGGCTTTTTTCTTGTTTTTGTGTAATTTACTGAGCATC | 18164 | A_95_P178667 FG196229     |
| 18817 | 222 | 32 | 449  | GTTCAATAGTAAAAGACAAAGTCACTAATGCCCTTATAAGCATGGAAGACTTAAAAC   | 18168 | A_95_P072245 BP525911     |
| 18821 | 222 | 36 | 384  | GTAAAAAGGGTAGGTGTTGATATATTGGAATGAATGGTTGTGAATGCACTATGTTTC   | 18176 | A_95_P120787 TA17047_4097 |
| 18829 | 222 | 44 | 701  | CACTGACATGCATTGCATTTTTGCTGTAAGGACAAAACGATGTATCTATTTAGGTTTT  | 18192 | A_95_P301278 FG640610     |
| 18830 | 222 | 45 | 615  | CCTCACCGTTAAGAAGTAACCATAGAAACGAAGGAACCCACTATTTATTTTTGATT    | 18194 | A_95_P192922 EB433140     |
| 18831 | 222 | 46 | 111  | CCTCCTTGGTGTGATCTGTGCAAGTGAACCTTAAAGAATATCTAAAGTGAACCTTAT   | 18196 | A_95_P094133 BP532579     |
| 18833 | 222 | 48 | 1150 | GAGGTTTCGTGTAATACAGTATATTGTGCAACTTATCTTGCATAGGGAACAAGATAA`  | 18200 | A_95_P179362 TA12489_4097 |
| 18835 | 222 | 50 | 443  | TGATCCAACCTTAGATAGTTTGTGATGTTAGAGCAAAGCTGAGGATCATTATTTTTGCC | 18204 | A_95_P192037 TA15366_4097 |
| 18837 | 222 | 52 | 576  | TGCTGGCCTACTTGAGAAGTTGAGTGTGGAAGATAAGAAGTCAGAAGAGAAGAGCG    | 18208 | A_95_P125267 DW005060     |
| 18838 | 222 | 53 | 2087 | CTGCACTAAGTGTGTAATCTGAAACAGAGTGACAAAGGTATTTGAGATTTAA/       | 18210 | A_95_P222167 TA21975_4097 |
| 18839 | 222 | 54 | 679  | TCTTGGGACCAATTTTACCATATATGATAGTCAACCCACACAATGGGGCAAAGCC/    | 18212 | A_95_P138622 EB442362     |
| 18842 | 222 | 57 | 1699 | TCACATTCAGAGGACCGGAGAAAGAGAGCCATGGTTTTATTTGAAAATGCTGCTTTC   | 18218 | A_95_P188657 TA14619_4097 |
| 18845 | 222 | 60 | 21   | CTTTCGGAAGGGTGGTTTACCGCTATTGTCATATGGATCACTGTATTAACATGACC    | 18224 | A_95_P190512 EH663872     |
| 18846 | 222 | 61 | 291  | GTTTGACCCTTGGTCGGAATCATTTGCTTACAGTTTAAAGAGAGATTCTTCATTTCTAA | 18226 | A_95_P089688 BP530605     |
| 18847 | 222 | 62 | 629  | TACAGGAAATATGGGCACCCTGGAAGTGAAGATGTGGTGTATATGAGCTATGCT/     | 18228 | A_95_P270676 FG634009     |



|       |     |    |      |                                                               |       |                           |
|-------|-----|----|------|---------------------------------------------------------------|-------|---------------------------|
| 18849 | 222 | 64 | 680  | CTCCTAGAGTTCAAAGGTTTTGAAGAGTTGCTGTTATTTGGCATATCAGGATATTATA    | 18232 | A_95_P184662 TA13744_4097 |
| 18851 | 222 | 66 | 1027 | CAAGATGCGAGAGCATCCGACAAGCTTATAAATACTCTATATATATAGATTCTACAAAC   | 18236 | A_95_P111287 TA13160_4097 |
| 18853 | 222 | 68 | 945  | GACGCGGCTTGTCATTGATGCTTGTTGTGTAATAAATCTTGATATGATATTCCATTTGT/  | 18240 | A_95_P019256 TA16669_4097 |
| 18857 | 222 | 72 | 1270 | CTGCCAAATTTGCTCCTCAAGAGCTTTTCGATTAGTTATTAATAAATCTCAAATCTGTATG | 18248 | A_95_P197002 TA16466_4097 |
| 18858 | 222 | 73 | 879  | CTGGAGCGTAGACTCGTTTTCGTGCTTCCGAAATATGTGTTCCAATATGGTGATAGTCI   | 18250 | A_95_P115822 TA11901_4097 |
| 18865 | 222 | 80 | 870  | CTACTGGGATGTCTTGCTGGAGTGAAATGGTACTTAAGGATGTTGGTTATCCAGTG      | 18264 | A_95_P246187 DV159853     |
| 18867 | 222 | 82 | 811  | TAGGTGACAGAAGTTCTCCTGAAAGTTGCAATACTCCTTATAATAAGATTGCAGTTTC    | 18268 | A_95_P000871 EB678587     |
| 18875 | 223 | 5  | 371  | TCATTCGTGGTTTTGCCTCCACCAGCTGCTTCAGTGATAAATGTGAGCCTACATCTG/    | 18283 | A_95_P137487 FG159598     |
| 18879 | 223 | 9  | 704  | TCTCGTAGTTCCTCTAGTATCATTAGCTGATGCTACAAAGTCCCAACAAAATAATATC/   | 18291 | A_95_P023726 TA18847_4097 |
| 18880 | 223 | 10 | 702  | ATCCGAGTTTCTTGCAATTTCTGAATCTATAAATCGAAATGGTCTGCTGCTCAGCGAG    | 18293 | A_95_P306233 FG150142     |
| 18881 | 223 | 11 | 22   | TGGGGAAGCATATATTTATCTGGTTTTGGATTGTTTCTTTGGCTTGACACTATTTGTC    | 18295 | A_95_P014371 CV021131     |
| 18883 | 223 | 13 | 158  | CTCACTTTGCGAGTATTTTTATACAACGCTTATTGAATAGATATCTGGGTCTTTGGTTT   | 18299 | A_95_P147492 EB451952     |
| 18886 | 223 | 16 | 780  | TTGATGTTGGAGGAGAGGTGTATGATCCCGAAACAAATGCATGGGTTGAATGCCAA'     | 18305 | A_95_P292548 FG167375     |
| 18887 | 223 | 17 | 455  | GATTCTTGATCTCAGACCATAACCTATCTTGGGGTAGGGGTAGAGAGGTTGTTTCTC     | 18307 | A_95_P277403 AM809125     |
| 18894 | 223 | 24 | 408  | CTTCCCGTCTTGTAGAATGTTCTTCAAATATTGATGACGATTATTTAAGTACATGCC     | 18320 | A_95_P094218 BP532608     |
| 18898 | 223 | 28 | 261  | ATACTATCACTAGGCTGCACCCATGTAATGATGATTCAAGATTTTGAATGCATTTCTA/   | 18328 | A_95_P177962 TA12112_4097 |
| 18900 | 223 | 30 | 960  | CCAAATCAAGCAACTATTATTGCAAAAAGTGAATGTCGAGGTTGGATTCCCCTGA       | 18332 | A_95_P187442 TA14347_4097 |
| 18901 | 223 | 31 | 1042 | AACTCTGCCAGCTATTAGAACAACATCCAAAGTTGATGCAGATGCTTCAGGAGAGGT     | 18334 | A_95_P208817 TA19053_4097 |
| 18905 | 223 | 35 | 222  | TACACTCCTTGAGTTATATGACTTTCTCCCTATAGGGGATTTGTGGATGCCCATGCTC    | 18342 | A_95_P101238 CB337254     |
| 18906 | 223 | 36 | 861  | GCTTTCTTTTTCCATTGTGGTTGCATGTAATTTGCACTTGTTTAAAGATGCCAGTTTC    | 18344 | A_95_P242972 DV158734     |
| 18909 | 223 | 39 | 409  | TCTGAGGTGTTAGTCGAGGTCAAGTTTGTGGTTCAAGTCTTGTAGCGATTGTTG/       | 18349 | A_95_P097703 BP534166     |
| 18910 | 223 | 40 | 715  | CAAGATGTCAATACATAATCCGTGAATACTCAATTTGATATTGCTGTTACCGGGCACT    | 18351 | A_95_P204237 TA18023_4097 |
| 18911 | 223 | 41 | 1732 | CAAGAATTTGCTCTGTTGCAGCAACTCCCTAATTGAATGGTAGTACTTATGTGAAAA     | 18353 | A_95_P240074 Z93768       |
| 18912 | 223 | 42 | 0    | AGGACGGATTGACAGATCAGCATGCAGAGCAGATGGAGATTGTTTTGTGTGCATGA/     | 18355 | A_95_P295923 A_95_P295923 |
| 18915 | 223 | 45 | 910  | TCATGAATGACAAAACCTTAAAGGCCTTGCAATTCATCTTTTTGTATGTTCAATGGTTG/  | 18361 | A_95_P205067 TA18201_4097 |
| 18918 | 223 | 48 | 822  | ATACATATATGGGATCTTAGAATGCTGAGTTTCAGTCCTTGAGCTCCCTGGACATGCT    | 18367 | A_95_P292428 FG159966     |
| 18919 | 223 | 49 | 801  | AGAGGTGGAAGCTGTCCAATTTATTACTGCCTTATCCAAAATGGATAACCAAAT        | 18369 | A_95_P135727 EB439252     |
| 18920 | 223 | 50 | 1165 | GTGCTTTTATCTTCTGAATGGAGAATAAACTATCGCCAGTGTGCCTTCTTGCTTTTATT   | 18371 | A_95_P006281 AY619950     |
| 18921 | 223 | 51 | 577  | TGTGCATTTAGTCTTGTTACCGTTGAGTTTTATCGAGTGTATCTTTGTTGATCAAGTC    | 18373 | A_95_P029441 TA14154_4097 |
| 18924 | 223 | 54 | 673  | TGCTATGAACAGATTTGTGAATGAACAAATGAAATACGGCATAACGAGGAAATATGAC    | 18379 | A_95_P227079 DW003523     |
| 18925 | 223 | 55 | 460  | CCCAACCATCTGTTCTCACATTTTTTATTTCCCTTGGAGGGTTTGAGCTATGTAATTT    | 18381 | A_95_P023356 EB445361     |
| 18933 | 223 | 63 | 323  | TATGTGGGTGTGACGATTCTGCGTGACAATTTTGTATGTTGAAGCCGAGGAATAT       | 18396 | A_95_P100228 BP535273     |
| 18935 | 223 | 65 | 903  | TTATTCAGAACCAACATCGATGAGATGTAAAGCCAGAAGTAGAACGTAAACAGCGG/     | 18400 | A_95_P148632 DW000754     |
| 18936 | 223 | 66 | 1105 | ACAGTTATGTTGGTTGAGATTTCGATTCAAATTAATGGTCGTTACCTATTGGTATTTG/   | 18402 | A_95_P214462 TA20268_4097 |

|       |     |    |      |                                                              |       |                           |
|-------|-----|----|------|--------------------------------------------------------------|-------|---------------------------|
| 18937 | 223 | 67 | 110  | AGCCCTGCGAATCATGTTGAATATATGTATTTTGCTTTTCCCCCTTATTTCTGAATG    | 18404 | A_95_P030981 TA18011_4097 |
| 18948 | 223 | 78 | 822  | AGCTCTGGTGGTCTGCATGATTGAATATTCTAGTTAAATGTGTAGCATGTGGCTTGG    | 18426 | A_95_P020436 EB432890     |
| 18951 | 223 | 81 | 254  | AACTGTCTGCAAGTTCGTGTTATATTTATGAAATCCCAGATTTAAAGACTTTTTCCGCC  | 18432 | A_95_P027271 TA14452_4097 |
| 18954 | 223 | 84 | 777  | AGGATGGACTGTCCCAAGCTTTGTA AAAATTTTTGACTCCTGCATCTGGTCTTCAAGGA | 18438 | A_95_P152012 EB682276     |
| 18957 | 224 | 2  | 780  | TTGATCTTCCATCCCTTGTGTTTCAGCTCCAAGTTGAAATCTAACACCTGCGGGCATCTT | 18278 | A_95_P212297 TA19803_4097 |
| 18960 | 224 | 5  | 643  | ATCGCGAGTCTAAAATAGATTCCATGTCTCAACATCTGGTTTTTGTCAATTTTCTCCAA  | 18284 | A_95_P136767 EB440510     |
| 18964 | 224 | 9  | 1006 | ACATGGAGCAGATCATTAGGGACTCTGTTGAGAGTTTGAAGATCAAGGGCTTTATTT    | 18292 | A_95_P011421 TA14585_4097 |
| 18968 | 224 | 13 | 808  | ACAGCTCTGCAGTATTATTCCTATCAGTGTGGACCCTATGTTGTCTGCATTTTCTGGC   | 18300 | A_95_P310338 FG135966     |
| 18970 | 224 | 15 | 1846 | CACATTTGTTAGTGATAAGTTGGTTGTAGCTGAAAAGTTGCAATCATTCCGGTTTATCTG | 18304 | A_95_P184752 TA13765_4097 |
| 18975 | 224 | 20 | 629  | ACTCTGGTCCCATGTTGTTAGTTTGCTACTGAATATCCAAATGTATTCTATTAGTGAA   | 18314 | A_95_P203392 TA17844_4097 |
| 18982 | 224 | 27 | 682  | AATCCTTTTCTATGCATCGGGAGATATCGTTCCCATGTTTGCTGGTGAATGCTCGA     | 18327 | A_95_P306613 FG636844     |
| 18983 | 224 | 28 | 838  | CTTGTCAGGGTTCAGTTTGCTATGGTTTGATTAAGATGATATGAGATTTGATCTCTA    | 18329 | A_95_P000241 TA11743_4097 |
| 18988 | 224 | 33 | 508  | TGAATCCATTTTGGAGCTCGTTTGTGAGATCTTCTCGGAGCTGGGTATTGAGGTTT     | 18339 | A_95_P262751 BP136794     |
| 18991 | 224 | 36 | 782  | AGAGCCACTAGCAAAATCTGGCGCAATGTTATTTTACTTTCAATTACTCTAATATTG    | 18345 | A_95_P001576 EB678787     |
| 18995 | 224 | 40 | 643  | CATATATATTTTCTGATTCTTAGCTCGGTGGTACTATCTTCTGGTGTGATTGGTTAT    | 18352 | A_95_P047726 BP131730     |
| 18997 | 224 | 42 | 892  | GAATGTTATGATGGGTATGCCTTGCTTGTGACTAAAGAGAGATGGATTCTCAAT       | 18356 | A_95_P180302 TA12711_4097 |
| 18998 | 224 | 43 | 394  | GAAACTGCGCCTACACTCGTTTCATGTCTTTATAAAAATTCTCTGGCATGATTTAC     | 18358 | A_95_P090433 BP530952     |
| 18999 | 224 | 44 | 340  | ATGGGAATGTTATGTTTTAAGTTACAGAAGGAACTGCTTCTGCATTTACCTCATTGG    | 18360 | A_95_P093903 BP532467     |
| 19000 | 224 | 45 | 91   | AGCGATTAAGATGGTAATTACCCCTCCCCAAAAAAGATTTTTTAAGTTGAGGAA       | 18362 | A_95_P033694 AJ632907     |
| 19001 | 224 | 46 | 799  | CGATCTTTGAGATCATTTTCATGTATTTCAGTTAGAGTTCGTGACTCAGTATCACCAGT  | 18364 | A_95_P284298 EB683736     |
| 19007 | 224 | 52 | 323  | TGCCTTCGGGTACAATTTTGAGAATTCGCGTGACACTTTTGGTACACGACTTTAACAT   | 18376 | A_95_P095588 BP533248     |
| 19009 | 224 | 54 | 194  | GAGGTGAAAGAAATGCTGTAATCTAATTGTATCAAGTACGCAAGGGCTGTTTCTCTT    | 18380 | A_95_P093948 BP532496     |
| 19011 | 224 | 56 | 809  | AGTCATGGTACTTCTGCTGATTCAAGTTCGAATACTTTCTGGATCCAACATCATCT     | 18383 | A_95_P152282 EB682625     |
| 19012 | 224 | 57 | 914  | TATACTACCTGTGGCAGCTGGTAGAAATTCCTTCCCTCAGCACTTGTGCTATACATCCT  | 18385 | A_95_P014406 TC42345      |
| 19013 | 224 | 58 | 518  | GTGGGTCAAGAGATATGCAGTTATGAAGCATGAAAAATACAATTCATTTCATAGTGCA   | 18387 | A_95_P060000 BP134886     |
| 19015 | 224 | 60 | 590  | TCATGTTCAAGGAAGAAACATGACATCTGGTGCAATTCCTTCGTGGTCCATGCACCTC   | 18391 | A_95_P006881 FG162981     |
| 19017 | 224 | 62 | 748  | TGTGCACTCTGGATATGGTTTGAATCAATTTGTGCCTCTGGATAGTTTCTGTTTTT     | 18395 | A_95_P003396 TA12760_4097 |
| 19028 | 224 | 73 | 1361 | GGATGAATGGTTTGGATTTTGAATTCATTTTATGCTGCTGTACTGTAAAAAAGTGA     | 18417 | A_95_P202187 TA17581_4097 |
| 19036 | 224 | 81 | 544  | GTGGGAGGAACTGGGTTTTATTCTGGTATTGAGGCGTTTTTGTATTTTATAAAAGC     | 18433 | A_95_P088943 BP530279     |
| 19037 | 224 | 82 | 559  | GCACTTTGTATTTACACTTCTTGATCTGTTATTAGCTCACATTCTAAGGTTGTGATAT   | 18435 | A_95_P161352 EH620095     |
| 19041 | 225 | 1  | 433  | GGGCAAAAAGTAAAGTCTAAGCGCATATGGCACGAAAAGGAAATCCTATTTCCGGTA    | 18442 | A_95_P075615 BP526774     |
| 19043 | 225 | 3  | 456  | TTGGTGTGAAATCAGCATGTCAACTAATGCATCTTCTTTATAGTATTTTCAATGTT     | 18446 | A_95_P022751 TA14181_4097 |
| 19044 | 225 | 4  | 380  | TTCTTAAATACTTTAGACGGAGCATCTCCGGTGAAGTGGTAACGTGGAGAGCTGAA     | 18448 | A_95_P081555 BP528287     |
| 19049 | 225 | 9  | 1350 | ATATTGTTCCAAGTTTCTTGGGTAAAGTTTGAGGATAATGGAAAATCATGGATTGCG    | 18458 | A_95_P008381 TA12544_4097 |

|       |     |    |      |                                                              |       |                           |
|-------|-----|----|------|--------------------------------------------------------------|-------|---------------------------|
| 19051 | 225 | 11 | 548  | CTATCTTGGGTTGACACTGACTGGTTTGTGTATCTACTTTATTAAGATGTTCTTTTCCA' | 18462 | A_95_P024721 TA16574_4097 |
| 19054 | 225 | 14 | 787  | AAAGACAATGGATTGAAGCATGTCACCTTTTTCAACTGCTGATGGAGCCCTAGAAGCA   | 18468 | A_95_P013281 TA18410_4097 |
| 19056 | 225 | 16 | 629  | GCTGGAATACGAGTGCTATTCAGATTGCCGCTATGTGCTTGTACTTCACCTGTGTTA    | 18472 | A_95_P122807 EB678148     |
| 19057 | 225 | 17 | 546  | GAAAATATGCAAGCCTTTGAAAGCTCTTGGAAATACATACAGTGAGTCTGCATCCTGG'  | 18474 | A_95_P092798 BP531978     |
| 19059 | 225 | 19 | 1030 | CGGCGAACTTGATATTTTACTTTGAATTCATCTTGAGAATGTTGGTTGCCCAAATTA    | 18478 | A_95_P013736 TA12594_4097 |
| 19062 | 225 | 22 | 1474 | TACTCCTCTTTTGGTCAATCTGAATACATGTGTATGTGTCTAATCCCAAATGATGCCTC  | 18484 | A_95_P218237 TA21127_4097 |
| 19065 | 225 | 25 | 618  | AATAGGAATAGGACACCGAGCCCTTATGGACCTCTGTATGATGGCTTCAAAGTTGGC    | 18490 | A_95_P138927 EB442637     |
| 19066 | 225 | 26 | 955  | AATGACTGCAAGAATAGTATCTTGGACAGGTTATTCCAAATTAATAATTGGCTGATC    | 18492 | A_95_P024506 TA11806_4097 |
| 19067 | 225 | 27 | 1913 | GGCCACTATATTTTCATGTGCTAGGTTACTTTTTGTGTGATTTAACTTCTGTACACAT   | 18494 | A_95_P195042 TA16032_4097 |
| 19069 | 225 | 29 | 1038 | ATTAGTAAGAGGCTTCAAGTATGAGCGTTGTAGATGACATGATGTCTTGGTGTACGA    | 18498 | A_95_P215822 TA20572_4097 |
| 19071 | 225 | 31 | 776  | CCTGGTGTATGTTACCCTTCATGAAAATCATATGAGTGAATAATGGGATTTCTTTTCT   | 18502 | A_95_P176652 TA11689_4097 |
| 19075 | 225 | 35 | 890  | CTGAAGGAGCTCATCTCCATATTGTTTCATCTGTCTGATGCTAGAATTCACATAACCTC  | 18510 | A_95_P245877 EB440641     |
| 19078 | 225 | 38 | 515  | CAGTCTCCTAATGGGTACATATCAAAGATCATAAAGAGTTTTCCGTTCTTATGAGTAA   | 18515 | A_95_P037213 BP128946     |
| 19082 | 225 | 42 | 768  | GCAGGACTTCTATTTACCAGGCGAGGCCACTCTTTTTTAGTAATTATAAAAATAAAGAG  | 18523 | A_95_P195922 EB448388     |
| 19086 | 225 | 46 | 0    | TGTCCCATTTGAACGATGTTCTGTGTAAAGTTGCAGATAGTTATTTATTGCCGAAGC    | 18531 | A_95_P029061 A_95_P029061 |
| 19091 | 225 | 51 | 199  | AGGGTGAAGTGTGAGGATAAAGCGAGCGGGGCTAATTAGGTTATCTGTTACATTT      | 18541 | A_95_P211357 AJ718047     |
| 19093 | 225 | 53 | 765  | TACCTACCTGCTGTGTTAATAGTACTATCTTCCATTCTCATTGACTGAACTATTAGCTC  | 18545 | A_95_P195132 EH622432     |
| 19095 | 225 | 55 | 590  | CTCTGCTATTTGGCTTTCATTTTTTCATGGATTGAGAAGCTGGATTTAGCTTCATTTTG  | 18549 | A_95_P045566 BP131181     |
| 19096 | 225 | 56 | 527  | CAAGCAGTTGTAACATAAATCTTTTTATCATTCTGCAGCTGCCATAATTAATGCCCTA   | 18551 | A_95_P123637 DW003499     |
| 19101 | 225 | 61 | 866  | TCAAGCATTTAAGCAAAGTGTGCGAGTTGGAGCTGTAATTGTTACTAGATGGATGGC    | 18561 | A_95_P293218 FG134918     |
| 19102 | 225 | 62 | 1089 | TTAAGCGCCAAGAGCCTTGCCGAACTACAGTTTTGGTATCAGTTTTGAAAATATTTGGC  | 18563 | A_95_P216147 TA20642_4097 |
| 19103 | 225 | 63 | 827  | AGAATTGCTCCAGGTTTGGCATCTCAGTTCGATTCACCATACACAGTACCAGTCATTG   | 18565 | A_95_P008911 TA14564_4097 |
| 19104 | 225 | 64 | 673  | GCCTGTTCAAAGATTCTGGATTTTTGTATTTGTAACATCGTGATTACCAGTGTTAC     | 18567 | A_95_P017656 TA12707_4097 |
| 19105 | 225 | 65 | 3458 | TTCTTTTCTGTACTAGCTTGCTTACAAAGTCGGAACCCACATTGGTTGAGTCGTA      | 18569 | A_95_P188907 Y10804       |
| 19112 | 225 | 72 | 107  | ACTTGTTGGAGTTAAATTCGTGGGTTATGGTTGTTTGCCTTGTACTGGGATGGCTCT    | 18583 | A_95_P139222 EB442961     |
| 19117 | 225 | 77 | 565  | CAGTATTAGTGACTTCCGCTCCTGCTCCCTTGTAAATCTAAGAAGTAAGAACCATT     | 18593 | A_95_P103122 FG162563     |
| 19118 | 225 | 78 | 293  | TAAACAGTCGTCCAAATTTCAAAGTACCCAATTGATGGCTTAATGCCATTGTTAACT    | 18595 | A_95_P154522 EG649624     |
| 19119 | 225 | 79 | 1018 | GCATTGAGTCTCGTCATAAGATGTGTTTTCTTTTGTAAATGGAATAAAAACTCTTTG    | 18597 | A_95_P210852 TA19484_4097 |
| 19120 | 225 | 80 | 0    | TATGTTTGGGCCGATGGGCTATAAATGAATTTTGTCTCTATAAAATGGGACTCTTTATT  | 18599 | A_95_P299333 A_95_P299333 |
| 19121 | 225 | 81 | 326  | AAAGTGCCTTTTCTTACATCCCAGTGTTCTCTGAATATTTGATGGCTTGTAAATTTG    | 18601 | A_95_P305878 ES658986     |
| 19124 | 225 | 84 | 0    | GATTAACCTCTTTAATCATATTACATAGCACGCTGCGCTTGTGTTGAGCGGCCG       | 18607 | A_95_P263806 A_95_P263806 |
| 19125 | 225 | 85 | 449  | AGCCTTGTGGCTAGTAATTCATTTGTGTGATCTGTAGAAAATCTGCAGACACCATTCA   | 18609 | A_95_P216057 EH618184     |
| 19131 | 226 | 6  | 698  | GGTCTCCTGATGATGAATTTGCCACTGGTTGCATATTTGAGTATGATGCTAAGCACC    | 18453 | A_95_P241315 FG198197     |
| 19135 | 226 | 10 | 847  | CTTGTGATGTACCATAATCTCAACTAGGCTGATCTTCATTTGTCAATCCATACAGATTA  | 18461 | A_95_P210767 EB678281     |

|       |     |    |      |                                                              |       |                           |
|-------|-----|----|------|--------------------------------------------------------------|-------|---------------------------|
| 19136 | 226 | 11 | 726  | CTTTGTTGATGCTGGTTATTTTATCCGTGCGAAGAATCAAAGCAAGCAAGAGGCTT(    | 18463 | A_95_P292398 EB427326     |
| 19138 | 226 | 13 | 933  | AGAGTATGACATGAAAATTCAGCTTATGACACTTCCAGTCCCGTGAGTGATCATA      | 18467 | A_95_P309503 TC47602      |
| 19141 | 226 | 16 | 238  | GTCTCTACCTGTTTGTAAATATTATTCTAGACAATTGTGGAAGTCATCAAACCTAGTCTT | 18473 | A_95_P095608 BP533257     |
| 19143 | 226 | 18 | 255  | TGGGTTTTGCCTACCCACCCAATTATGGAGAACAGTGTGATGCATTGTATTATCCTTC   | 18477 | A_95_P176217 T18327       |
| 19146 | 226 | 21 | 822  | TATTCCGTGCACAAGAAGCCTGAGCATGAATGGTGTGAGCACTAACCAATTGTATAA    | 18483 | A_95_P242777 EB428460     |
| 19147 | 226 | 22 | 630  | CTGGTGTAAGGCTATATGCCAATTCTACAAAAAGACTACTTTTGTATTTGTATCTC(    | 18485 | A_95_P159572 EH617840     |
| 19150 | 226 | 25 | 607  | TCCCGTCTTTTCTGGGCCTTTTTGTATTGAATTATTGTTTGGGGCTTTTTACTTGTGG/  | 18491 | A_95_P019496 TA17318_4097 |
| 19156 | 226 | 31 | 789  | ATTTTCGCGCGGTGTAGTCTAGAGAAGAGAATGATGCAACACTTTTGAATAAACCTT    | 18503 | A_95_P012276 EB438347     |
| 19167 | 226 | 42 | 1128 | GGAGAATTGCGGGCTGGTAGGGAAAAATGACTTTTCTAACAGAAATTAATTCATTAG    | 18524 | A_95_P156112 TA15739_4097 |
| 19170 | 226 | 45 | 813  | GACGATCATTGAGGAAGTCAATGTTTGTCTCAATTTGCTGAACTTAACGGGCGATGA    | 18530 | A_95_P127027 EB426443     |
| 19171 | 226 | 46 | 812  | AAAGTTGCTTCTCTCAATTCTGCCATCCTGAGTGTGATACCTTTCCCTCGAAGTACA    | 18532 | A_95_P227159 FG156975     |
| 19178 | 226 | 53 | 792  | GAACTTATGATTCAAGCAGGCATCATTACCTCCTTCTCTTATTGCCCTAGCTCAGTTT   | 18546 | A_95_P144752 EB450832     |
| 19182 | 226 | 57 | 481  | TTGTTGGACTTGACAGTAGCTATATGATCCAAATTCACTTGGATGTACTAGCTTTGCTG  | 18554 | A_95_P181152 TA12913_4097 |
| 19183 | 226 | 58 | 658  | AGTATGAAGGAAACCTCGATGTCAATGGGGAGGATTACTCTGTTGAACTGCTGAA/     | 18556 | A_95_P120727 DW000694     |
| 19185 | 226 | 60 | 1050 | GATTTGAGAGCTCTTGCCAAATATACTCAGGGATTGAGTGGAGCTGATATCACTGAG    | 18560 | A_95_P070885 TA14230_4097 |
| 19189 | 226 | 64 | 1783 | GCTTGTACTTTAGTTTGGTCCCTATGACAAGTGTAGATTTTTACGACATTTGGAGT     | 18568 | A_95_P176307 U73937       |
| 19190 | 226 | 65 | 672  | GTAAAATACTCCTTTTACAAGTTAAAGGTAAGTCTCGCGATGAATGTGAATTGTGCTTGC | 18570 | A_95_P287448 FG639700     |
| 19194 | 226 | 69 | 569  | ATGGCGGATTGCGTCTCCCTCTCAATTTTCTGATGTATTTATTTTCTAACACCAATA    | 18578 | A_95_P122642 DW002623     |
| 19198 | 226 | 73 | 338  | GATGATGGCCGATATTACGTACAAAAGAATTGTAAATACTCTGCACGCTAGTCTTTTA   | 18586 | A_95_P159657 AM830473     |
| 19202 | 226 | 77 | 474  | ATTCTGCAGCTTATGTGGGTGCAATCCAGTAATCCTGCAAAGGATGTTGGTGTGGGA    | 18594 | A_95_P096593 BP533689     |
| 19204 | 226 | 79 | 0    | TTGTACCCGTTGATGAACATGTGAGGAATAGCAGCAAGAGTAGGATATGAAAGAAG     | 18598 | A_95_P224177 A_95_P224177 |
| 19205 | 226 | 80 | 434  | AATGATGTGTTTGAAGAGAAGGTTAGAACATGCTGCGAAATTTCTATCGATAGAGTT    | 18600 | A_95_P304158 FG638884     |
| 19206 | 226 | 81 | 446  | ACTTGAAGAGATGTATCAGAGTTTGTCTCTCGCTTGTCTTTGTTCTTGTCTTTTA      | 18602 | A_95_P037806 BP129099     |
| 19209 | 226 | 84 | 1553 | ACAGATTTCTTTGAAACAAATGTGAATTGAAGGGGAGGGGACTTCTTGATTGTTTAA    | 18608 | A_95_P019316 TA13825_4097 |
| 19210 | 226 | 85 | 398  | TGATCTAGAAAAATCAGCACAGGATAGTGAGCAGAAAGGGGATTGAGTGGATGAGC     | 18610 | A_95_P139462 EB450728     |
| 19215 | 227 | 5  | 2129 | TTTCATTTGATGAGAATGTCTCTCAGTTTTTGCACATTCCTGGTGTATGTTACCCTT(   | 18619 | A_95_P013111 TA11688_4097 |
| 19224 | 227 | 14 | 499  | ACATGATGTATGTTTTCTCTCTTGGGAATTGGTTCTCTAAAGAAGCGTCTGCAGTA     | 18637 | A_95_P252859 EH619757     |
| 19226 | 227 | 16 | 137  | CCTCACAGGCAATAATGTCAGGAACATTGATTTTTGCTTCTTATTCAATCTGTTTTCC   | 18641 | A_95_P132987 EB433910     |
| 19227 | 227 | 17 | 522  | AAGTAGGGCTGCATATTCTTTGGGATACCTGTGTACCGCTACATTTTTGAGTGAACCC   | 18642 | A_95_P091338 BP531303     |
| 19230 | 227 | 20 | 712  | TAAGTAATGTTGAATTCAGGACAATTGGTGCAGAGTTTGGGTGGATCTTGGTACAG     | 18648 | A_95_P252704 FG185867     |
| 19232 | 227 | 22 | 881  | GTTATTAGAACTTTTGTCTTTGACAGAGGGTATTAGAGCCTTGTGAAACAGGAACT     | 18652 | A_95_P185672 TA13964_4097 |
| 19234 | 227 | 24 | 350  | TGACATATGGTTGTCTATCTATCTGCCAAGTTCCATTTAAGGGGAGTGGTGCATTGC    | 18656 | A_95_P089733 BP530626     |
| 19235 | 227 | 25 | 555  | TTCGAGAAGAGAGAGATACAATTATAGAGAAGGAGCCATACTCCAGTGGCAGCAT      | 18658 | A_95_P138432 EB442203     |
| 19237 | 227 | 27 | 445  | CGATGTACAAACTTAAAAACAGTTCCTGTGAGCTTAGTTGAGCAGAAGTGAGTATG     | 18662 | A_95_P025651 TA17917_4097 |

|       |     |    |      |                                                              |       |              |              |
|-------|-----|----|------|--------------------------------------------------------------|-------|--------------|--------------|
| 19238 | 227 | 28 | 746  | TAAATTCAGAGGATTCCTGTCGGCAAGATCGGTTACTGGTTTCCTCGCTGATGTTTA    | 18663 | A_95_P310398 | FG136120     |
| 19244 | 227 | 34 | 259  | TAGTACATCTTTCAAGTTAAAGCTCTACTTTCAAGACTCAGCCATCATTGCTGATTTTG  | 18675 | A_95_P132932 | EB433790     |
| 19247 | 227 | 37 | 835  | GAAGTACCTTCTGGTTCCACTCTATGTGTATTTCATGGATATCCATCTTCAATATCTTGG | 18681 | A_95_P292938 | EB429014     |
| 19248 | 227 | 38 | 563  | TGAGCTGGAGTTGATTGACATATTTTTATTGGTGCTTCTTTACTCATTTCAGGAGTTT   | 18683 | A_95_P209962 | TA19299_4097 |
| 19251 | 227 | 41 | 837  | GGGGTCTATTTGTTGGGTGTATTATTGTTGTGATAACGTCATTGGATAATTTAGCACT   | 18688 | A_95_P229724 | DV159219     |
| 19252 | 227 | 42 | 776  | GTTGTGTTTAGTGAAAGTGTGAAATCACAAATGTAGTTGGTTGGTCTGAAATAGGTTG   | 18690 | A_95_P119542 | DV998886     |
| 19255 | 227 | 45 | 897  | GAAGAACCAGTTGGGAATATATTCTAGCACTTTTTTGCATTGGATTACAGTTTATGGA   | 18696 | A_95_P291713 | EB424685     |
| 19257 | 227 | 47 | 682  | AGGAAGCTGGCCTTTTTGTTTTGAGGTTATAAATCTTTTACTAGAATATGTGGGTTG    | 18700 | A_95_P289053 | FG641473     |
| 19267 | 227 | 57 | 1488 | GGTCGGTGATCTGATTGTAATAACATACTTCTTCTGAATGTTAATTGATTTGTCTG/    | 18720 | A_95_P182442 | L29275       |
| 19272 | 227 | 62 | 909  | AGGCTCAACAAACAGGGATTTGTACCTTACCACCTACCTCCCTCCAGTAAAGCATG     | 18730 | A_95_P197742 | EF051138     |
| 19277 | 227 | 67 | 451  | TAGTAAACAGATGCAACAAGTGTATAGTTAACTTCAAAGCTAGTAGACCAGATTTG     | 18740 | A_95_P134877 | EB437765     |
| 19280 | 227 | 70 | 410  | CTGCTTGCTTCTCTGGAAAGGAAAGATTCATATGATCATTGTTATTCAAGAGTCACT    | 18746 | A_95_P031536 | BP135385     |
| 19285 | 227 | 75 | 183  | TTGATGTTTAAAGAAGTGAACGATCCGACCGGTCTGCTTTGAGCTTTTGCATTTGCC    | 18755 | A_95_P158867 | EH616756     |
| 19290 | 227 | 80 | 310  | GGAAGATGGTGGATGATATGGTTGGTGGTAAAGCTGCAAAATTTGAATAACGTATCA`   | 18764 | A_95_P071398 | BP525693     |
| 19291 | 227 | 81 | 845  | GCACAAACACCAGTATGATTGGGATGCTGCAACATCTGTAATTCTGCGCAATATGG,    | 18766 | A_95_P249002 | FG141593     |
| 19296 | 228 | 1  | 578  | CTGGCTTGCTGCAAACTTCTATTCTGCACTTTATTGGACAGATATTAACATAAAI      | 18612 | A_95_P306303 | FG642762     |
| 19299 | 228 | 4  | 844  | TCAGCCGTTCAAAGTGACAGAGAACAACATGGAATTTCTTATGACCGCTAGATGTA,    | 18618 | A_95_P232579 | EB438485     |
| 19300 | 228 | 5  | 842  | TTTGCCAGCGGGAGTTGAATATATTAGATTCTTCCCAAACCAGAGCATTTCAGGGC     | 18620 | A_95_P145247 | EB448849     |
| 19304 | 228 | 9  | 272  | CGTTTGTGATGATCGCCATTCAGAATTGATTCCGTGTCTCGACAGACATCTCATATTC   | 18628 | A_95_P170396 | EH664893     |
| 19307 | 228 | 12 | 325  | TTCCCCCTCTGAGACTGTGTTACCGGAAGTTGTTGATTAATGACCACGTTAAATCCAT   | 18634 | A_95_P080405 | BP527996     |
| 19314 | 228 | 19 | 635  | TATGACACCCATTGCTCTTAGGAAAGTTGATGAATAGGCTGAGAACAACCAGCCCGC    | 18647 | A_95_P164052 | EH623175     |
| 19315 | 228 | 20 | 822  | TAATGGCACTTCCAGCTGGAACAGAGATGATCTACCACTGAACCAATACGAGTACA     | 18649 | A_95_P017411 | EB440363     |
| 19320 | 228 | 25 | 328  | CTTGCTGCAAGGGTTTTAAATGCTTTTATTTTGTGAAAGAGTGATATCGTGCATCCTT   | 18659 | A_95_P241609 | BP534117     |
| 19323 | 228 | 28 | 1824 | CGCGAGCTAATTCTTTGTATCCTTTTGAATAATGTTGCCTTTTGTGAGGTTCTTGTT    | 18664 | A_95_P009861 | AF220611     |
| 19325 | 228 | 30 | 888  | TTAGGCCGACAATACACCTTCTAGTTACATCAGTCCGACAATCTTTTGGATTTACA/    | 18668 | A_95_P009716 | EB426099     |
| 19326 | 228 | 31 | 817  | CATAGCTATCTTATTTTGACAAATCAGACCACCTATGAGCTCGTTAGACGACGGCGCA   | 18670 | A_95_P216742 | TA20771_4097 |
| 19327 | 228 | 32 | 503  | AAGCTCAAACCTCAGGGGAAGTATGGTTGGTGTATTTACGTGAGGTTCTTAGTGGT     | 18672 | A_95_P266676 | BP534541     |
| 19337 | 228 | 42 | 501  | TCGTTGTCTTCCAACCATTTCCATTGGTTTTTCATGAACCAGCTTGGTAGTTTCGACTTC | 18691 | A_95_P185802 | FG623230     |
| 19338 | 228 | 43 | 118  | TTGTACCATCTGGATGTATTGGACCTGGGAATGAATGTAATGCTTTATTACACCAACA   | 18693 | A_95_P110652 | CV019834     |
| 19345 | 228 | 50 | 599  | TTTGTGATTCCGATGTCTTCGTGAAGATGAATGTTGGGATTGTACTTGACGAGGGC`    | 18707 | A_95_P001856 | FG144547     |
| 19346 | 228 | 51 | 1100 | TTCCCATGCACGGCATGTTAGCAGATATGGAAGTGTGTTGTTGAATTGGCATGTTATT   | 18709 | A_95_P135027 | TA18105_4097 |
| 19349 | 228 | 54 | 596  | AAGATCTAAGTCAGGATTTAGATGCAACTGGGAAGGAAGAATTGGGTAAGTCT        | 18715 | A_95_P203122 | DW004322     |
| 19351 | 228 | 56 | 692  | TGTTTGTGTTGGCAAATATTATGACCTCTGCTGAAGAGTACACGTTTCTATTTTGTGTI  | 18719 | A_95_P295393 | EB445884     |
| 19355 | 228 | 60 | 677  | AGAAAGATGGAACACGTGATAATGACTGGAAATGTCCTAAATGTGGAATGTCAAC`     | 18727 | A_95_P155847 | FG143076     |

|       |     |    |      |                                                             |       |              |              |
|-------|-----|----|------|-------------------------------------------------------------|-------|--------------|--------------|
| 19356 | 228 | 61 | 139  | GCTGCTTTCCACATTGCAAGGAACTAGAATTTTACTTCCCCAAAAATAAACTGTAT,   | 18729 | A_95_P033979 | AJ717979     |
| 19357 | 228 | 62 | 362  | AAGTAACTGTGAGCATATTACCGTTGTCTTTTTCATCAAATTCGCTTATCCCTA      | 18731 | A_95_P147402 | EB451797     |
| 19359 | 228 | 64 | 413  | GATAACTCAGTGTATCGCCTCTACTTTTGGCTTGACTCCATCTGAGGATGAGGGTGA   | 18735 | A_95_P161592 | FG160077     |
| 19363 | 228 | 68 | 720  | AACTTCAGTACTCGTGGGCGTGGATGAAAACTTAATATTCAGGTTGGATTTTCATCT   | 18743 | A_95_P290288 | DV162520     |
| 19367 | 228 | 72 | 378  | CTGTATGGTGCATATGAGAATGCTTGGTTCTCCCCTATTTTAAAGATGTATGATTTCA  | 18751 | A_95_P003766 | EB436307     |
| 19371 | 228 | 76 | 156  | TTTGAAGATTGGGAGGCCTACTAATTTATGATAAATACACATGAGTTTCCGGGGAC    | 18757 | A_95_P070280 | BP192578     |
| 19372 | 228 | 77 | 824  | AAATTTGCTGCAGAACTTGAAGGACATACTGATACCGTGATTTCCGGTAACTTGCCA   | 18759 | A_95_P224487 | EB451710     |
| 19375 | 228 | 80 | 93   | TAAGGCTAACCATATAGGTCTATGATTACTGCACAGACTAGCTCGTTCCCTGTTG     | 18765 | A_95_P102302 | CV015968     |
| 19379 | 228 | 84 | 592  | AGAAGCAGGCAGCATTATACATTGGAGAAAAGGCTTATGAAATCTGTGTGAAGAAA    | 18773 | A_95_P060690 | BP135063     |
| 19383 | 229 | 3  | 760  | GTATGTGATGATAGGTTCTCCACTAGTACATGTCTCATATCCTCGGAGAGCATAAACA  | 18780 | A_95_P099458 | BP534936     |
| 19386 | 229 | 6  | 454  | GGGCCTTTTGTATTGGATTATTGTTTGGGGCTTTTACTTGTGATCGTGAAATTTA     | 18786 | A_95_P141762 | EB445401     |
| 19389 | 229 | 9  | 177  | ATCATACTCCAAGTGGTCCTGACACATTTGAAAATGGCGAAGGTTTTACCCCTACTA   | 18791 | A_95_P147902 | EB643486     |
| 19392 | 229 | 12 | 485  | AGTCTGTCTATAGTATTTTCGAGTTGCCGGTGAATGTCTATACTTTATGAGTCATTTT  | 18797 | A_95_P186172 | TA14069_4097 |
| 19395 | 229 | 15 | 734  | GAGATTTCTAAGTGTCTAGTTTTGATTATGATGCAATGTTGGGAAATGAGCCCTTTC   | 18803 | A_95_P208902 | DV159975     |
| 19396 | 229 | 16 | 354  | GGCTATTGACATGATGAGAAGGAAGTATGAGCACGTTCCGCAGTTGAAATACATGC    | 18805 | A_95_P157832 | FG142745     |
| 19409 | 229 | 29 | 612  | AAGCTAACTTGAGCTTCAGTTGCTTTCCAGCTACTACTAATATATCAATTAGTAGTAG  | 18831 | A_95_P187482 | EB445354     |
| 19410 | 229 | 30 | 340  | TCGAGATGTCGCTCCCGGATAGGTTATCACAAGCCTGCTTTGATTGAATCATCTTTC   | 18833 | A_95_P021171 | DV157598     |
| 19414 | 229 | 34 | 1386 | GACCATGGGCAGATGCTTCTGTATTGATTTTCCGTTTTGATATCTTTTACAATCCA    | 18841 | A_95_P034763 | AY619953     |
| 19417 | 229 | 37 | 602  | CCGTTTCTTCAGCTAGTATGTTAGTTTTGCAATTAATCTTGAGTAAACAATCTGTACC  | 18847 | A_95_P005981 | EH617048     |
| 19421 | 229 | 41 | 697  | AGCAATACTACACAGCTTGGTGTGAGTTTTGCTGGTGGATATTTGGGCTGGTATTCT   | 18855 | A_95_P159487 | EH617741     |
| 19422 | 229 | 42 | 816  | GTATCCACGAATGGAGGCAATATTCATTGTTTCAAGCTATAACCCCTTGTGGCTTATT  | 18857 | A_95_P298513 | EH622237     |
| 19430 | 229 | 50 | 661  | GGCCTAATGCCGCTTTTGATGTATTTCCGTCAAAATTCTATGTGGAAAATGAGAGTG   | 18873 | A_95_P258416 | TA12009_4097 |
| 19431 | 229 | 51 | 1138 | CATTTCTGATGTATACTTTCGAATTATTAGGCAGAAGGGACTATGTCTTCTCAAGTTA  | 18875 | A_95_P018801 | TA15093_4097 |
| 19433 | 229 | 53 | 249  | GCATCCTTTGGAAATGCTTACTGCTTCACTCATTAATGACATATTATGTTGGGTACA   | 18879 | A_95_P184602 | TA13730_4097 |
| 19435 | 229 | 55 | 495  | ATTAATAATTCTGACTTGATATATCAAGCAGCCTCAGGGGATTCGGATGTGGGGATT   | 18883 | A_95_P075345 | FS411604     |
| 19436 | 229 | 56 | 179  | CGTGCTGCAGCTCAAGAATGGTTTTGTTTAAAGTATTATCTTGTGTAACCTGTTCTGT  | 18885 | A_95_P210762 | TA19465_4097 |
| 19443 | 229 | 63 | 1687 | ACTTGCACTTAGAAGGAAGCTCGATTATGACCGTCTGAAAACCTGCTTCTGATTGC    | 18898 | A_95_P214482 | TA20272_4097 |
| 19450 | 229 | 70 | 0    | AAACCACATTCTGCGCTGAAGCTGATTTGATGATAGCTGGTGACTGAAGCTGCATG    | 18912 | A_95_P309963 | A_95_P309963 |
| 19452 | 229 | 72 | 782  | CATTCCTGGTGGTTGGGAGTTGGTCTTATGATGAGTAATTCAAGTTTTCAGGTGAGAA  | 18916 | A_95_P161992 | EH620691     |
| 19453 | 229 | 73 | 264  | CCATGGAGTAGTTATCTTTAGGGTTTGGATGATTTTGTGATTGATACTTGTGTTGG    | 18918 | A_95_P209522 | TA19208_4097 |
| 19456 | 229 | 76 | 815  | CAACAGATGAGGCGTCAAAACATTGACTCAATGAGCGGCCAATCAATTAATTATTTA   | 18924 | A_95_P205237 | EB424983     |
| 19460 | 229 | 80 | 521  | CATGTCACTTTTGTCTGTTCTCCTCAATCTTATTTAATAGTAGGGCCTTCGTGTCTG   | 18932 | A_95_P031686 | DW003455     |
| 19463 | 229 | 83 | 799  | CTGGCTCTCCGAATTCATATGCTTACTTTAGTTTAAACATGGTATTATCGGATATTTGA | 18937 | A_95_P184347 | TA13675_4097 |
| 19474 | 230 | 9  | 261  | TTACATGTCTGAATGTTTAGTACATTTCTGAGCTCCACTCATAATCCATGACTGTTCTT | 18792 | A_95_P097278 | BP533966     |

|       |     |    |      |                                                              |       |              |              |
|-------|-----|----|------|--------------------------------------------------------------|-------|--------------|--------------|
| 19475 | 230 | 10 | 217  | GCAGTCATCAGGGTGACAGTACACATTAATATGCAAGTGAGTATTTCTACAATTAT/    | 18794 | A_95_P009511 | EB448560     |
| 19477 | 230 | 12 | 749  | TGATATCAGTTCTAGGTCCAATGTCCTTTGCTGGCCATTCCTCACAGACTATTGGTTC   | 18798 | A_95_P311603 | FG143367     |
| 19479 | 230 | 14 | 221  | AAGTTGCGCAGCCAGGAGGATGAATGACCATATTTGGCTTTCAAATGATATCTACTA`   | 18802 | A_95_P112962 | CV020938     |
| 19480 | 230 | 15 | 861  | AGTTATACAATATTGTGATGACCTCGACGAGATCCCTCCTAGCTTTGCCGATATCCA,   | 18804 | A_95_P115482 | DV157713     |
| 19481 | 230 | 16 | 641  | AAGATGTTGATGCTTTTTGTGAAGTGTGGTATGTCTAATGACATCCTGGTTTGTG      | 18806 | A_95_P019146 | EB432106     |
| 19482 | 230 | 17 | 818  | AAGGATTTCTCGTTTGTAAACAGCTAAGCTAATATGGTCTCGAGTCAGTTTGGTTAA/   | 18808 | A_95_P009826 | TC41163      |
| 19483 | 230 | 18 | 970  | TGGGTAGTCCTGAACTTGATACGAGCTCTCATATCTATCTCAATAATATCTTAAATGC/  | 18810 | A_95_P014611 | TA13902_4097 |
| 19488 | 230 | 23 | 885  | CCCTACTTTTCTGTTACATTTTTCTAATGTACCGGCTGAGTTTGGTCATTTTTGAGAAT/ | 18820 | A_95_P249752 | AJ309009     |
| 19489 | 230 | 24 | 296  | TTATTTAATTGTACCCCGGACTGGTTTTTGCCTATTTAAGTAGGCTAAGAATTTTCT    | 18822 | A_95_P052511 | BP132942     |
| 19491 | 230 | 26 | 489  | AGAATCTCAGACTGCATTACATACTTTTTGTTGTCGAGTTTTATGTCAATGTACAAC    | 18826 | A_95_P029696 | EB445136     |
| 19494 | 230 | 29 | 539  | TAAGATTGAGTAGCAGCTTTTTATCTGCTTTGTTCTTGATTTCTTAAGTTCCTGCTCT/  | 18832 | A_95_P312693 | FG151860     |
| 19497 | 230 | 32 | 1374 | CAGTGATATTTCCGTAATTACGCCATTTCACTCTGTCATTTGCTTATGTCATACTTCAAC | 18838 | A_95_P011991 | TA14296_4097 |
| 19501 | 230 | 36 | 778  | GTGCACTTATCAATGATCTAGGCGAGTTGAAGGATTGCAGAACTCCTGTAAATGA      | 18846 | A_95_P163557 | DV999212     |
| 19502 | 230 | 37 | 279  | CAACTGCTGATGAACATGGTCACTATCTGACCCAAAAATATATGTGTTAAAAGCTTA    | 18848 | A_95_P105087 | CV017290     |
| 19504 | 230 | 39 | 565  | CTGTTTTAGTGTGGTTGGTGTTATTGCTTTTATTTGGTTAAGATACTGTGGATCTC     | 18852 | A_95_P108017 | FG622663     |
| 19506 | 230 | 41 | 769  | TTATTTTTCGCACTGCTAGGCTATCTGGTGCTCATAACCTGTATGATCGAGAGTGCGC   | 18856 | A_95_P312993 | FG160784     |
| 19507 | 230 | 42 | 268  | AGGGGCAGAAATTTCTTTATGATTTGATTTGCATTGTTCCCTGTTGATGGACTTCCC    | 18858 | A_95_P156217 | EG650470     |
| 19509 | 230 | 44 | 661  | TCAGCATTGCTGTGATGATTTTGTGCATAGTCTTTACAATGTGGCACATAGACTTCC/   | 18862 | A_95_P135622 | EB439134     |
| 19512 | 230 | 47 | 875  | CGAATGGTAGTCTAGAAGAGCATATCATTTCTTTCCATTCTTTGTCATGAATATTCGG/  | 18868 | A_95_P212337 | TA19811_4097 |
| 19514 | 230 | 49 | 682  | CTGGTGACTTGAAAATGCTCTTTAACAGCAATATTCACCTTTGGATTAGAGATGGTCTA  | 18872 | A_95_P023491 | DW003798     |
| 19515 | 230 | 50 | 738  | GGATGAATCAGCGTGGTTTCTGGATATTGGAGGTCATTGTTGTTTCATGTCACCAGCA/  | 18874 | A_95_P246532 | EH621518     |
| 19516 | 230 | 51 | 306  | ATTGTGCTCCTGAGTGGTTTATTTTCAGTTTAGCAGTAGACCCTCTTTCATTGATTTG   | 18876 | A_95_P135577 | FG629295     |
| 19521 | 230 | 56 | 864  | ATTACACATTATCGAAGGAGCTGATCATGAATTCACCTTCGCATCAAGATGAGTTGGC/  | 18886 | A_95_P117152 | DV159941     |
| 19525 | 230 | 60 | 835  | TATGTTACTGCAGCAGCGAAGCCTTTGATGTGTAATACTCGTTCCGGTTAGAATGCCT   | 18894 | A_95_P183082 | TA13375_4097 |
| 19526 | 230 | 61 | 289  | CGTGAAATTATGACACCAGTTTTGGGTGGAGTTTTACTTCGGATTCATATTTGTAATA   | 18896 | A_95_P093758 | BP532399     |
| 19528 | 230 | 63 | 708  | GCATCATTTCAATAGGAGTCACTGCTTTTCGTGCATTGTAAGTGGCTGAAGAAATGTAC  | 18899 | A_95_P251507 | FG644568     |
| 19530 | 230 | 65 | 612  | TAAAAGCAGCGGAGCCAACACTCATCAGAAAGGAGATAAGCAATATCACTTGAA/      | 18903 | A_95_P269811 | EB433245     |
| 19543 | 230 | 78 | 194  | GGGTCGACATATCTCTATCTATCTTTGGTCTTTACTGTACATAAGTAAGTCTTACGTAT  | 18929 | A_95_P211502 | TA19625_4097 |
| 19548 | 230 | 83 | 683  | GTGTGATGATTCTTTTGTCTTAAACAGGCTATTTATTTGTATGGAGTCATCATCCCATG  | 18938 | A_95_P291603 | FG165897     |
| 19550 | 230 | 85 | 1023 | GATTGGAGCAGCAGAAGTCAAATGCATATTGCGAGGCAGTGATTAGATAATAAAAA/    | 18942 | A_95_P192312 | TA15425_4097 |
| 19551 | 231 | 1  | 756  | GCATTCATTGACGCGGACAAAGTGAATTATCAAAAGTATCACGAGAGATTGCTGCAC    | 18943 | A_95_P226154 | FG194205     |
| 19552 | 231 | 2  | 897  | GTGAATGTTGAATGAGATTGAATATAACATGGTTTTGCTGTCCAGTGCATGCAAA/     | 18945 | A_95_P238629 | AB023479     |
| 19555 | 231 | 5  | 313  | GTTAGCCTTTCTTGAAACTCGAATTTAACCTGTAGATAGTATTGAGCTGGATTAATTC/  | 18951 | A_95_P048931 | BP132041     |
| 19557 | 231 | 7  | 1080 | CGCATATCCCTAGAATGAGCTTGTAATATGGTTGTGCCAACTTATGATTAACAAT      | 18955 | A_95_P022871 | TA12945_4097 |

|       |     |    |      |                                                             |       |                           |
|-------|-----|----|------|-------------------------------------------------------------|-------|---------------------------|
| 19566 | 231 | 16 | 925  | GGAATAAATCTGAACCCCTATAACCTGTGTATCATCATTGTTGTATCATCAGTACATT  | 18973 | A_95_P193837 TA15757_4097 |
| 19568 | 231 | 18 | 701  | TATCCAACCATCAGCCTATCTTCTCATCTCCGCTGCACTATGTTGATAAGGAAATGCA  | 18977 | A_95_P287018 FG639578     |
| 19569 | 231 | 19 | 92   | GCAGATTTTATTCGCTAAGAAGTAGGAATTCGGAATTGCTGAGCTCGCTAATATTGT   | 18979 | A_95_P132847 EB433632     |
| 19571 | 231 | 21 | 624  | CAAAAACCGTACTTTGAGACCAAAAGACTCAGATGGTCGTCCAGATGAAGAAGTTGC   | 18983 | A_95_P041661 BP130150     |
| 19576 | 231 | 26 | 847  | TATGATATATAACCGGTGGAATGGGATTCTTGAGGCGGAGTATGGGTTTCATGCACCT  | 18993 | A_95_P295413 EB446027     |
| 19582 | 231 | 32 | 860  | GCTACAAGAAAAGCAATTTTAACGGTTTCATTAGAAGAGCTTTATTAGCTTCTCGTTCC | 19005 | A_95_P187347 TA14326_4097 |
| 19583 | 231 | 33 | 729  | CTTGAGATGGCTCCCTGATCCTTTTCTTTGTCAATTTTTCCACGTTTGTAAACATTGC  | 19007 | A_95_P216312 DV158438     |
| 19586 | 231 | 36 | 802  | TGTATGGTCGCCTCCACCTTTACATTTGCTTATATGCAGAGATCAGGGTACAGAGTGA  | 19013 | A_95_P267996 FG153457     |
| 19589 | 231 | 39 | 250  | GCAATTTTCTGGGGATTCTAATGTATTCTGAATAGTACTTTGGTACTATTGTTGAGCC  | 19018 | A_95_P007351 BP533064     |
| 19590 | 231 | 40 | 559  | TCAGCCTAGCTTTAGCTTCTGTTGCAACAGTATTTTACTGTATGAAATTTGATACCCTT | 19020 | A_95_P017921 TA17887_4097 |
| 19591 | 231 | 41 | 204  | GTGGTTGTGATGATGAGTGGAAAGGAAGAATGGAAGGGTATTTTATTACTAGTATCT   | 19022 | A_95_P104962 TA17047_4097 |
| 19592 | 231 | 42 | 888  | TTGGGGCTTTGACCAGTTTGAGACAGCTTTATGTTGCACATAACAAGTTAACATGTCT  | 19024 | A_95_P137257 EB440979     |
| 19594 | 231 | 44 | 511  | GGGGCTGTAATAATCTCTATAATAAACAGATTTGGAGCTTATTAGTAAAAGCTGGGG   | 19028 | A_95_P121407 DW001469     |
| 19598 | 231 | 48 | 400  | CATATTGTACATTGGTGTCTTAAGGAAGAAGTCCTTGAGTTATGTGATCTCCTCAGGC  | 19036 | A_95_P026696 BP135949     |
| 19600 | 231 | 50 | 1109 | GGAAGCAGTTGTAGTATTAGTTGTTGAGGAAATACTTTTAATTTTATCCAGACAGT    | 19040 | A_95_P182122 TA13138_4097 |
| 19603 | 231 | 53 | 822  | ATCTTTTTAGCTGTATGATGAGGCAGATTCAGGATTTAGACGGGATATATCAACAG    | 19046 | A_95_P291818 EB424969     |
| 19604 | 231 | 54 | 649  | TTGTTTTTACTCTTTTATCAGGAGAAAGGAAAGTAGAAATTATGGATTGCCCAAC     | 19048 | A_95_P134652 EB437237     |
| 19605 | 231 | 55 | 369  | GTCTCGGGCCAGGTCCATTGTATAAATAGAGACAATTAGCTCTATTAGTAGTAGTTT   | 19050 | A_95_P068595 BP137169     |
| 19606 | 231 | 56 | 680  | CTGGAATCAAATAAATCCTGTGCGGCTCTTTTTAACAGTCTTAAAGTTAAAGCTG     | 19052 | A_95_P196422 TA16335_4097 |
| 19607 | 231 | 57 | 261  | GACTCACATGATGCCTCCTTGGTTTTCTATGTTGATGCAAAAACAGGAACGCCGTT    | 19054 | A_95_P241955 EG036055     |
| 19608 | 231 | 58 | 415  | TCTGTCCGATATTTCTTGTCTGTAATGAACAACTGTTTGCAGAATCAAATGATAGT    | 19056 | A_95_P088898 BP530264     |
| 19611 | 231 | 61 | 818  | TTTCATGCTTTTTGACATGGATGGTCATCAAGTTCTTCAAATACAGTTGTTCAAGTT   | 19062 | A_95_P199832 TA17076_4097 |
| 19613 | 231 | 63 | 86   | AAACGAAAGCTATCTCCGAAAGAAGAGCCTGAGCCAAAAGGTTGCAGCGGATTGC     | 19066 | A_95_P034144 AJ718211     |
| 19616 | 231 | 66 | 826  | GGGGCAGCAGTTATCAGAATCACCAAGCAAATACTTAGAATGTTATTTATTTAATGT   | 19072 | A_95_P139532 EB443303     |
| 19619 | 231 | 69 | 0    | CAGTTTGAAACATTTGGTAATGGGGAGTCTGATAAGCCAAAACACACAGAAGAAAA    | 19078 | A_95_P293468 A_95_P293468 |
| 19623 | 231 | 73 | 402  | GTGCTGAAAGTCTTCATGATGAGTTTGAAATTTCTGTATCTAATGGCGTGGCATAATC  | 19086 | A_95_P133887 EB435581     |
| 19626 | 231 | 76 | 769  | GGTACCTGTTAATTCTGCCAATAATAAGGATCATTATGTCCTCTCGTGAGTACTATAT  | 19092 | A_95_P011896 TA12183_4097 |
| 19627 | 231 | 77 | 876  | GCTTCAGATATTAAGATAGCATTGGATGGAGGATTAGAAAAGATCTGTAAATATGTT   | 19094 | A_95_P022761 TA18270_4097 |
| 19631 | 231 | 81 | 659  | GGAGAACCTTATCAGAAAAATTTATGCTATGCGCTTCTTGGAGGAGTGAGATGCATA   | 19102 | A_95_P297728 FG634385     |
| 19632 | 231 | 82 | 618  | TTGTTTGTGCTCATGGAGCTTTTAGGGTCCGGAGGATTTGTTCTTGTATGATCAAGA   | 19104 | A_95_P122707 DW004634     |
| 19634 | 231 | 84 | 1877 | GGTACCAAAGTGGAGACGAATTGTTGAATAATTAAGTGTATTTCTTTCTCCCT       | 19108 | A_95_P183207 TA13405_4097 |
| 19635 | 231 | 85 | 664  | CATTGCTAAGGCCATTGGAAATTTCTGTGGGGTCTGAGTAATCGTATGCAGGAAAA    | 19110 | A_95_P056231 BP133902     |
| 19640 | 232 | 5  | 737  | CCAAATGGCTGTATGATGGTTGCACAACGACTTGAGACCTCTATGTTCTGTTTTCT    | 18952 | A_95_P281463 FG642462     |
| 19644 | 232 | 9  | 716  | GAGGCTTCAGGCAGTATTGAAATGCATCAGTTGATAATCTTGCCTTCTATGAGCATT   | 18960 | A_95_P203672 EB680704     |



|       |     |    |      |                                                              |       |                           |
|-------|-----|----|------|--------------------------------------------------------------|-------|---------------------------|
| 19647 | 232 | 12 | 273  | TTGGGAAGCCATCGACGTTTCTGATGGACTTTCTATTGCAGAAGTATAACATCACTAC   | 18966 | A_95_P081035 BP528156     |
| 19651 | 232 | 16 | 606  | GCACACTGGGCGTGATTGTGACAAGTTTCAAAGGTAGAAAAAGACAGAGAAAG/       | 18974 | A_95_P188912 EH614541     |
| 19652 | 232 | 17 | 621  | GTGGCTCTTAGTTGGACTATGTTCTCTTTGTTTATAGTACAAACACGGATAGCAACT/   | 18976 | A_95_P307728 FG639284     |
| 19654 | 232 | 19 | 2861 | GCGGGTTAAACCAAACCCATTATTTTTGCTCGAACTATGTATACGTATGCAAAAAGA    | 18980 | A_95_P212947 TA19945_4097 |
| 19666 | 232 | 31 | 828  | ATAGTGTTAGGAGCTGCTATGACGAGGGAAGCGGACTGCTGAACTGACTATGAATA.    | 19004 | A_95_P292273 FG146921     |
| 19667 | 232 | 32 | 118  | TCCAATGTCAGCTCTAATGTTAATAATAATGACTGACCCCTCCCTCCCTTCAAATCTAT/ | 19006 | A_95_P316313 FG188087     |
| 19670 | 232 | 35 | 517  | GCTCTTGGTGTA AATTGTCTGCAAATTGCCATGGATTTGTGAAAACTATACATCTT    | 19012 | A_95_P029446 BP529479     |
| 19674 | 232 | 39 | 692  | CACTCCCGATATGGATGTATGATGTGGAGTATTAATTTTAGTGGTTAGATACGATC     | 19019 | A_95_P213112 EB435618     |
| 19675 | 232 | 40 | 422  | TGACCCCTTCAGTGAATTCTGGATCGTAATTGAGTGTCTTAATTACTCTAGTATAT     | 19021 | A_95_P095968 FS412034     |
| 19679 | 232 | 44 | 253  | TGTGTTAGAACCATTGAACTTTCAATCTATTGGATCGACCCCTTGATCTTCTGTTATG   | 19029 | A_95_P133742 EB435391     |
| 19680 | 232 | 45 | 285  | GTTTGGGATGCCAAACTCAATTTGTATCTTTTGCACATCAATGATCAATGGTGATTG    | 19031 | A_95_P136862 EB440572     |
| 19682 | 232 | 47 | 1285 | CAGCAAGGCTGATTTCAATGCTATGATTTGGCAATTGTGTTACAAACAAAACAATGT    | 19035 | A_95_P179627 TA12552_4097 |
| 19683 | 232 | 48 | 845  | ACCTGGACTTCAAATTAACATGCCAACCCCTTAATCTCTCTTCTCGGGTGTGTTA      | 19037 | A_95_P126517 EB425828     |
| 19685 | 232 | 50 | 505  | GTGCATGTTAAACATCTGAGAAAACCAAATGTAGGTGTTTGTAAAGAGAAATCGAAGC   | 19041 | A_95_P022496 FG640166     |
| 19690 | 232 | 55 | 362  | CTTTCCTGCTTGAATAATTTGGTAGAACCAATTTGTCTTAACAGCTTCACTCTGGGATC  | 19051 | A_95_P030811 BP136525     |
| 19692 | 232 | 57 | 512  | TTTCTGTTGAATTTGAGACATAACAATGTTTTCATCGAGAGAAGGGAGAAGAGAGAC    | 19055 | A_95_P161192 EH619949     |
| 19697 | 232 | 62 | 888  | GTTTTTATAATTTGGGGCCACAAACAGGCCTGATATAATTGACCCTGCCTTCTGCGAC   | 19065 | A_95_P258806 TA14230_4097 |
| 19699 | 232 | 64 | 454  | GGTGCAAACCTTTGTGCTGAATTGCTGCTTCTTAGATATGATGTAGAGATTAGGAA/    | 19069 | A_95_P212922 TA19939_4097 |
| 19701 | 232 | 66 | 845  | CGGGTGTAGAACTCTCCTGTTTTTTCAGGTGTAGTTAATGAATCAGCTTTTCAAGAT    | 19073 | A_95_P010651 EB682950     |
| 19723 | 233 | 3  | 300  | GACTATGTGGTACTTTGTGCATTTAGCTTCGGTACATCCCTCTCCAATAAAAAGTAGTC  | 19116 | A_95_P125257 DW005053     |
| 19726 | 233 | 6  | 509  | TTTCACTTGTGATGAAAGAAGGTGTAGCAATTGTGGGATTTTACGGGGCGTTCTGG     | 19122 | A_95_P212747 EH616394     |
| 19729 | 233 | 9  | 0    | AAGCTTTAAAAATGCAGCGTTGTGCCTGTTTGTTCAGTGAACAGCAGATTTGATACC    | 19128 | A_95_P024131 A_95_P024131 |
| 19730 | 233 | 10 | 428  | GAGAGAAGTTATGTGAAGCAATTGACAAAAATCCCTTGAGCTGTCTGGTCATAGGG/    | 19130 | A_95_P113232 TA12319_4097 |
| 19731 | 233 | 11 | 177  | GTATGATAGTTCGCTTCTCTAATAGAACTATGTAGTTAGCTGTGATGTAAGTGAACC    | 19132 | A_95_P098248 BP534387     |
| 19734 | 233 | 14 | 428  | TCTTATGGAAGTTTCACTACTTATGAGAGGATTCTATCAAGCATGCAAGTGTAGGGC    | 19138 | A_95_P077825 BP527352     |
| 19735 | 233 | 15 | 423  | TTATAACAAGAGCGGCTGTGAACGAACAATTCATTTAGTATACTGCAATAACTTTTGCT  | 19140 | A_95_P023496 TA15726_4097 |
| 19737 | 233 | 17 | 855  | ACACTGGCGATTTGATTCGTTATCAAGAATTGTGCCGTGCCATCAAGCTGCATTGAA    | 19144 | A_95_P190762 TA15084_4097 |
| 19741 | 233 | 21 | 476  | GCAGTTCTCTATGAACATAGTTTGAGCTGAGAAAAGTTGAGATGGGCCTTATGTTTC/   | 19152 | A_95_P232044 FG641634     |
| 19742 | 233 | 22 | 608  | TTCGGCAGATCTCTAAGCTAAGATTTTCTTCACTTTTATGAGAATTTTGTACTGGGTTA  | 19153 | A_95_P011491 BP530118     |
| 19743 | 233 | 23 | 380  | ACAAGTGCATCTTTGAAGTTCACAGTCTTGAACCCCAAGGGGCGAATTTGGACTATG/   | 19155 | A_95_P147702 EB426400     |
| 19744 | 233 | 24 | 550  | ATTCAGGGATAATTATTCGTTTCGATATGGTTGCTCTTAAATGTCCATTATTAGAGG/   | 19157 | A_95_P178747 TA12334_4097 |
| 19745 | 233 | 25 | 244  | CTTCTGTTTATGTGCTTGATTCATTAACGCATTTGGTCCAGCAGTTCTTTAATCTTTT/  | 19159 | A_95_P031311 EB444332     |
| 19748 | 233 | 28 | 274  | CAAGCTGATAAACACACCTTTCTAAATGTAGAATGCTGCATTAGATTGTTAAGGTGTA   | 19165 | A_95_P001771 AJ632774     |
| 19749 | 233 | 29 | 816  | TTCTAACTTACTGCTTTTGTAGCTCGCTACCAGATTGTACTTGTGATTACTTGTGTG/   | 19167 | A_95_P273131 EB681678     |

|       |     |    |      |                                                              |       |                           |
|-------|-----|----|------|--------------------------------------------------------------|-------|---------------------------|
| 19751 | 233 | 31 | 714  | GAAGGCTTAGATTTAGTGGCTGTTATAAGCCTCTTGCTTTTCTATCTTTATTTGGATCT  | 19171 | A_95_P000676 EH615247     |
| 19755 | 233 | 35 | 226  | GGGTTGTATGTTGTACCAAACAACTTTCTTGTTATTCTGACGTTGTTACCTGAAT/     | 19179 | A_95_P132372 EB432848     |
| 19764 | 233 | 44 | 1502 | GTATGCTCAGTATTTTTCCCTCCAGAAGTATGAAAGAAAATAGATTGAATTTTTGCC`   | 19197 | A_95_P186397 TA14118_4097 |
| 19765 | 233 | 45 | 490  | TTTCCAGCAATCTCAAACCTATTGTTCAACCTGGGCTCACTGGACAGTGAAGCTGGTATC | 19199 | A_95_P091533 BP531401     |
| 19766 | 233 | 46 | 372  | AAGGGCCAGTCTACTTGGTCTTACTTATGCAACTCAATATCTGAGCGTTCTCCTCATA(  | 19201 | A_95_P026926 TA17881_4097 |
| 19768 | 233 | 48 | 799  | AAAGAGAGGGGATATCAATATCACACCCTGCCCGTTTTATCCTTATTGGTTCGGGTA,   | 19205 | A_95_P184917 AF014053     |
| 19769 | 233 | 49 | 434  | GCTTAGTTTAAATCCCTTATCTTGGGCTTAGCCATTCTTTTTGTTTTATGTGTCGTAAG/ | 19207 | A_95_P278348 AM832067     |
| 19771 | 233 | 51 | 685  | TATCCAGGGTAAAGTGGAGTTCCTTTCTTTGTAGCCATTTCTTGAAAATCCACTATA/   | 19211 | A_95_P316678 FG197371     |
| 19772 | 233 | 52 | 617  | TTGCTGACATCTAAATCTTGGCAGCATCTATTGTGCTTCTTGTTGGATCTTGCTCACT`  | 19213 | A_95_P116857 DV999689     |
| 19779 | 233 | 59 | 0    | GCATGGAAGGATTTCTGTTTTGGATTATATCATCTTACCCAAAATTCGGAAAATGG`    | 19227 | A_95_P259631 A_95_P259631 |
| 19781 | 233 | 61 | 505  | ATTGGTCATCTGCTGGAGGAGAACCCTGGATAAATGAATCCATTACCGCCCTCATA/    | 19231 | A_95_P120582 FS392203     |
| 19783 | 233 | 63 | 429  | ACAACCTACATTGATGGGGAGTACTTTGGTGGCTGTGACATCACTGTAGAAGCATT(    | 19235 | A_95_P103402 CV016485     |
| 19784 | 233 | 64 | 560  | ACGGGTGCATTTTCATGTAGCATGGCTTGGCATGTGTTTTAAATAACCTTGAAATAATT  | 19237 | A_95_P065360 BP136309     |
| 19788 | 233 | 68 | 766  | CAAGCTGCGCAAATTGGATATTAGCTGGTTTTGAAAATTGTTATAGTGTGTAATAAC    | 19245 | A_95_P269941 EB428069     |
| 19791 | 233 | 71 | 592  | CATGCTTGTTGACCAGCTTAAATGAAATCATGGTGAGAAGATAGGAATAAAATGGG1    | 19251 | A_95_P132487 EB432978     |
| 19798 | 233 | 78 | 425  | AGATGTTGAAGCTCAAATCCGTTGTTGCTTTGTTATTTGTTTGTGCGCTCTGTATCC    | 19265 | A_95_P094173 FG635922     |
| 19800 | 233 | 80 | 1012 | AGTGTTCACCCCTCTCCCCCTTGATTAATGAATAATCTGTTTATCTTAATGCTC       | 19269 | A_95_P191547 TA15261_4097 |
| 19806 | 234 | 1  | 433  | TTTTGTCTGCTTTAGCTCTTTCTTTGGGCTCACTGAATGGTCCCGTTGCTGCTTTTAA   | 19113 | A_95_P092113 BP531648     |
| 19809 | 234 | 4  | 1222 | GCTACCTAGCTTGTACTTTGAGTATATTCCATGCGGCTTGTATAGTTTTTAATAAGAC   | 19119 | A_95_P008001 TA12648_4097 |
| 19810 | 234 | 5  | 785  | TAGGGCTTTTTGTAATGACTGTGTAAGACGATGGTGAATATATGTAATTGCTGTCTC    | 19121 | A_95_P146017 TA12122_4097 |
| 19812 | 234 | 7  | 1282 | CTGGCTGTTTTTGATTGCCAAAATACACTCAGAAGTGTGAGTAGAGCAATTTGTAT     | 19125 | A_95_P237854 AJ006228     |
| 19813 | 234 | 8  | 2339 | GCATCGTCTAAAACAACGATTTTTATCAGCTGTAGCAAAGAAAGAACTTCATAGAA(    | 19127 | A_95_P029026 TA12266_4097 |
| 19814 | 234 | 9  | 1450 | GTTTAACTCTCAGTTTACCCCAAGTGTTTTACTTTTTGAGATTCAAACAACATCTTA(   | 19129 | A_95_P214932 TA20369_4097 |
| 19816 | 234 | 11 | 240  | GCACCTGGGACTGTAATGATTGCCAAGACATGCAAATCCATGTAATTGTAATTCTTTT   | 19133 | A_95_P092333 AM802310     |
| 19824 | 234 | 19 | 1441 | ATTATGGAAGAAAAGGCCTGGCCCCGATTCCAGACACTGGTCTTGATTGAGAGTTT,    | 19149 | A_95_P194002 TA15796_4097 |
| 19829 | 234 | 24 | 273  | GCTTACTGTAAAGTGAACCTTTGTGGGTTGATTTAAAGACTAGTACCTTTTAAACAG    | 19158 | A_95_P067655 BP136933     |
| 19833 | 234 | 28 | 507  | GGCTTATTAAGCAGTATTTTGTGGGTTGGTCTTACTTAATAGCCAACATTTTGGCAT/   | 19166 | A_95_P220917 DW004366     |
| 19837 | 234 | 32 | 551  | GGTTGTAATCAACCATGGGCATGTAACCGTAAATCCGTTGATACAATTTATTATCTG    | 19174 | A_95_P006266 FG633965     |
| 19838 | 234 | 33 | 106  | AGGCTTGTTGGTTGAACGATTTTGTTATCTATTCATTTGCCTTACTTGTATTTGTCGGC( | 19176 | A_95_P121327 DW001339     |
| 19839 | 234 | 34 | 723  | TTGTACATCTTATACAGTAATACTGCTTATTTAAGCCAGAAGGGGTTATTTGCGTTG(   | 19178 | A_95_P013421 EB429134     |
| 19844 | 234 | 39 | 584  | TATGCGTTTTAGTCTAGGTATGCCTTCTTGTTCACACTTAGATTCTATCCATATTCA(   | 19188 | A_95_P005351 TA12063_4097 |
| 19846 | 234 | 41 | 740  | TAGCTGCCGTCGATTGCGAGTTCGTTTTCTCCATCCCTATCTTCTATTAGTATATT     | 19192 | A_95_P115817 DV158194     |
| 19854 | 234 | 49 | 964  | TGTGGACCTCTATTTGTTGGATGGACCGATTTGGATAGATGAAGCTAGTTTGGTTG(    | 19208 | A_95_P005061 L16767       |
| 19857 | 234 | 52 | 780  | AGATAGCAATCAAGGTATCCAAGAGGGTTAGCACTTCCACTGGTAAGAGACGAGTA(    | 19214 | A_95_P204567 DV159964     |

|       |     |    |      |                                                            |       |                           |
|-------|-----|----|------|------------------------------------------------------------|-------|---------------------------|
| 19866 | 234 | 61 | 805  | TGTTGTTTCCAATTTTGGTTTACATTTGAAAGGGTGTGTTTGGTACATTTGCCTCGGA | 19232 | A_95_P258648 DV159788     |
| 19867 | 234 | 62 | 737  | CAGGTAAAGATACAGCAAGTATCCCAATTTACAAGACAGAGGCTGATATAACTATTT  | 19234 | A_95_P242622 DW000916     |
| 19870 | 234 | 65 | 403  | ACTACTATTGTAATTGCAGTACAGGCTTTTTACGAATAGATAATGCACTTCCTTGTGG | 19240 | A_95_P130077 EB430050     |
| 19876 | 234 | 71 | 875  | GCCAACATCTTGAAATAAGAATGGCATCTGAAAAACATTTCTGCTGTTGAAAAACAT  | 19252 | A_95_P289788 DV160971     |
| 19881 | 234 | 76 | 404  | GAGCAGTGAATATAGTCTTATTTCCAGGTGCTGATCCGGAATAAATAACATGAAGTT  | 19262 | A_95_P163252 EH622262     |
| 19884 | 234 | 79 | 689  | AATCTGGTCTTGGGCTGAACTTTGCTGAGCTCCAGATTAGTCGTGGAAACTCTTGTTG | 19268 | A_95_P073500 EH620962     |
| 19885 | 234 | 80 | 428  | GCATGTTAAATAAATGTTGTGGTTGTGTTTGAATAGCTTTCACTGACTAGCATTGG   | 19270 | A_95_P154837 TA15535_4097 |
| 19892 | 235 | 2  | 873  | TGTTTCACAGTTGTTAAGGATGTACCCTTTGCCTTCGAGTTCTCTTCGGCTTTCCTGG | 19282 | A_95_P223052 TA22165_4097 |
| 19893 | 235 | 3  | 818  | TGGTCCGAGCTGTGTAGCAATACAATAATGTGGAATGTGGTGGAGTTTCTTTGAAC   | 19284 | A_95_P270291 EB430842     |
| 19896 | 235 | 6  | 795  | ATTCAAAGATGGAATCTTGATCTCCCTGATTTTCTCGTGGTTTCCCTAAGCCAGCTC  | 19290 | A_95_P126582 EB425904     |
| 19897 | 235 | 7  | 635  | CTTCGCTTGGTCTTTTGAGGTGAAGATACTTATGAAAGGATGTTTCTCTTTAAACTT  | 19292 | A_95_P087548 TA19868_4097 |
| 19900 | 235 | 10 | 418  | TTGTACCTGACATCCCTTCGCTCCAAGATGGCTTGAAATTGTTTATCAAAGCGCAGG  | 19296 | A_95_P002101 BP528296     |
| 19904 | 235 | 14 | 455  | CACCCAAAGTAGGGTCTTTGTGATTTGCATTATTTGCATTCAATTTGGAGTATAGCA  | 19304 | A_95_P001446 FG642881     |
| 19907 | 235 | 17 | 845  | GATGCTTAAGAAGGATTAATCTAAAGCTCAGATCACCGCTAAAGGTGGATTGCCGC   | 19310 | A_95_P116022 DV158516     |
| 19908 | 235 | 18 | 746  | AAGAGGAAGATTTAGAAGAATAAGGGCACGTCTCGCTAAAGTTAGATCCTAAGTG    | 19312 | A_95_P206997 TA18644_4097 |
| 19910 | 235 | 20 | 359  | TAATTGTGCACCACCCTAATGCACTTTACTTATGCGATGTCGTTCTGCTCCACCAA   | 19316 | A_95_P135897 EB439593     |
| 19911 | 235 | 21 | 531  | ACCTTTTTGGTGTGTCCCTTCTATTTGCTGGTCATGATGAGAATGGTCTAGCTTGT/  | 19318 | A_95_P107822 CV018545     |
| 19914 | 235 | 24 | 776  | ATGATGAAATTGACTTGCAGAGCCTTCAGAGGCCTTTTTGCCCGTGTACAGAACCA   | 19324 | A_95_P291583 FG172556     |
| 19919 | 235 | 29 | 251  | TTCCTTAAAATTTATCTAAAGATCGAGTTGCAAATAAATGATGTTTCCCTGGTTCCGG | 19334 | A_95_P110317 CV019680     |
| 19921 | 235 | 31 | 581  | CGTCATATGCTTGTGGAAAATGCTCTTTGCTTCTCCTTCCAGATATTCTCTACGA    | 19338 | A_95_P040711 BP129900     |
| 19922 | 235 | 32 | 716  | GATTCTTTGCTTAGAAGATGTAATGATAGTTCTGTGGGCTTTCTGCATGTTTCTT    | 19340 | A_95_P159647 EH618039     |
| 19923 | 235 | 33 | 615  | AGCAAATGAGCTCTTCCTTGTGCGAGATATTATATGCTTTAATAATTGCAGCTTCTA/ | 19342 | A_95_P018271 TA14646_4097 |
| 19925 | 235 | 35 | 406  | GCTGCAGCAAAGCAATACATTGAGAAACATTACAGAGAGCAGATGAAAAATTTGCA   | 19346 | A_95_P085370 X71057       |
| 19926 | 235 | 36 | 818  | GAGAAAATGGTTTCAAAGTTGTTACCCTTCTCCGTTTGGAGCCCTTCTTCTTTTCTT  | 19348 | A_95_P203652 TA17898_4097 |
| 19930 | 235 | 40 | 392  | ACTGGTCCACCACCAAACTCTTGTATTAATTAATTGCTAGTAGCCATGTTTGTTC    | 19354 | A_95_P090273 BP530884     |
| 19931 | 235 | 41 | 823  | GAGGCGTCAAAACATTGACTCAATGAGCGGCCAATTAATTAAGTATTTAACATAAA   | 19356 | A_95_P205827 EB424983     |
| 19932 | 235 | 42 | 1238 | CTTTATTTCTCTGGGAGTTGTTTCATGACATGATTTTACTGAGGTTGTCTCCCTGCTC | 19358 | A_95_P182077 TA13127_4097 |
| 19934 | 235 | 44 | 394  | TTCGTCTAAGACAACTGAACTGATAGACTTACCTTTTTGATTTTCTGTACTGTAAC   | 19362 | A_95_P024536 FG644144     |
| 19937 | 235 | 47 | 1227 | GCCATTGTCGCACAGATGATTTCTTCTAGTATATACTAGTGAAATTTTATTGATGTTT | 19368 | A_95_P200167 TA17151_4097 |
| 19940 | 235 | 50 | 748  | TAACCATGATCTTGAAAGGGTTGGCATGGGGATTGAGCAGAACTAGGATCCTCAGTT  | 19374 | A_95_P213197 FG161520     |
| 19946 | 235 | 56 | 127  | TTGTTATGGGCCCCATCTTCTCTGCGCCGGGACATAATTTAGACATATAACAAAGC   | 19386 | A_95_P155387 EG650038     |
| 19947 | 235 | 57 | 458  | CTAAGAGTAGAGTATTGCGTCCCTTTGTATTATGACCATCATCTGATGAATGGCACC  | 19388 | A_95_P039066 BP129444     |
| 19949 | 235 | 59 | 785  | ATACATCGATAACACAGCATTCTCCCTCTCTAGTCTCTGAACATCATAGATGCGCTA  | 19392 | A_95_P285073 FG165655     |
| 19950 | 235 | 60 | 107  | CAATGTGCAGAAGGAACCTGTAGTTGCTCCCCAATTATGACAATGTTATATAGTTT   | 19394 | A_95_P242407 DQ460102     |

|       |     |    |      |                                                              |       |                           |
|-------|-----|----|------|--------------------------------------------------------------|-------|---------------------------|
| 19956 | 235 | 66 | 431  | CTTCTATCAATAAACCAAAAAAGAAGTTTGAACCTGGTTGAAACCTGATTGAACTGCT   | 19406 | A_95_P182092 TA13130_4097 |
| 19962 | 235 | 72 | 447  | ACAACCCAGATTTAAACTTATAATAACATAGCCTCATGCCGGATCCCTAGTAGGAAC    | 19418 | A_95_P132722 EB433357     |
| 19965 | 235 | 75 | 476  | TACCATTGACATGGGAAATGTTGTTATGATCAAATAGCTTAGCTATAGCTTTGTGTAC   | 19424 | A_95_P003741 TA12063_4097 |
| 19967 | 235 | 77 | 215  | ATGCTGTAACGGCGTGCCTATGCAATGTCCTGTCCATGCATAATGAAGTTTGA/       | 19428 | A_95_P178902 TA12371_4097 |
| 19969 | 235 | 79 | 0    | ACTGTAATGCAGATCCTTCATGTTAGAATCAATGATGATCGTGTGTTGTTAGCGGCCGC  | 19431 | A_95_P231114 A_95_P231114 |
| 19970 | 235 | 80 | 518  | AGTAGAGCGACGATCTTGTCTTGTGTTAACAAGGGACAACCATGGTCAACAATTTCACT( | 19433 | A_95_P010061 EB432801     |
| 19978 | 236 | 3  | 401  | GGGTTGTGCTGTAATTGGTATTGGTTCTAGCTTCTACCAGTTTATGTTAATCTTAAA/   | 19285 | A_95_P002891 EH623972     |
| 19981 | 236 | 6  | 987  | TGAGGAGGAAGACGTTGATGAGGCACATTGATCAATTTTAGAGTTGGTTATTCTAAA    | 19291 | A_95_P067100 TA14838_4097 |
| 19990 | 236 | 15 | 692  | GTAATTCATTGAGGAATCTGCTTTTTCATGGCATTCAAAGATCGTTGCTGACATGGA    | 19307 | A_95_P282833 FG196092     |
| 19995 | 236 | 20 | 475  | TCTCGAAATTGATTGTCACTATGTGCGTGAGAGTCTTAATTCGGGCTGATATCTCTG    | 19317 | A_95_P276128 AM783324     |
| 20000 | 236 | 25 | 967  | GCAGCTTTCATATGCATACTTATTGCAGAAATATGGAGTATCATTATTAACAGATGGT   | 19327 | A_95_P013741 TA16406_4097 |
| 20001 | 236 | 26 | 456  | GTGATTGAAGATGATTGCAGTGTGTAGGTATTGTGACATTTGCTAACATGTTAGAA/    | 19329 | A_95_P275908 TC66158      |
| 20008 | 236 | 33 | 562  | GCAAGATGGAATTCTGAATGTTCCATGGTTTTGTTGTATCATATTTGACATCTTGGCT/  | 19343 | A_95_P125437 DW005234     |
| 20009 | 236 | 34 | 935  | GCTCTGCCATTTTTGTTGTTGGATTGCAATGACATGAACTCTTGAACCTGTTCTGTGTC  | 19345 | A_95_P177922 TA12104_4097 |
| 20011 | 236 | 36 | 735  | CATTAACATGTGCTTGATTTTCTCCATGACTATGTTGTTGGCTTGAATCCTGATCAA    | 19349 | A_95_P136557 EB440325     |
| 20015 | 236 | 40 | 592  | ATTTTGCCGTACCCTGGGTGGTTGGATTTTATTGTATACTCTGAAAACGTATTTTTCT   | 19355 | A_95_P222502 TA22047_4097 |
| 20022 | 236 | 47 | 93   | TAAAGGAAAAGTTCTAAACCTGAGAGAGCAAGTACTTTGCTAAACGTGCTGCTCAGG    | 19369 | A_95_P033884 AJ717826     |
| 20027 | 236 | 52 | 621  | GTTTTGAAACTTCAATTACTTTGGGGTTTTCTGTTGTTTTCTGATAACGCTGTTGAACA  | 19379 | A_95_P286198 FG639851     |
| 20028 | 236 | 53 | 293  | GTTCTATCCTATTACGGTTAACTTCGCCCTTCTCCTTCTCAATGATGGTACTTAGT/    | 19381 | A_95_P112347 CV020632     |
| 20029 | 236 | 54 | 650  | GTGGTTTAAAGAAACCAATTGTTTCAGCAATTTCTTTGAAATGAGATTCCATCAAGGGCT | 19383 | A_95_P299748 FG635361     |
| 20033 | 236 | 58 | 909  | AGATATTTAATGAAACTAAACTCTGCCAAGAAGCTTCTTGCGAACCAATCTTCTAC`    | 19391 | A_95_P223622 EB425095     |
| 20034 | 236 | 59 | 501  | AAGCAAGTTGTCACCTACTAGTTCCTCCAACCTGAGTTCAGTTGATCCTACTGGGAT    | 19393 | A_95_P036658 BP128789     |
| 20040 | 236 | 65 | 888  | TAGTAGTGAGTTATTGTTTCTTAGTCTAGTCGGAGCTTAGCTGTGTCCTCCTGATCTA1  | 19405 | A_95_P119127 DV162197     |
| 20041 | 236 | 66 | 541  | CGACTTGATTTTGCAGATGTTGCAAAGTAAGAAGAAGAAGAAGGGACAAATC         | 19407 | A_95_P202642 BP131040     |
| 20042 | 236 | 67 | 602  | GAAAGTTGAATTGTGACCCTCTGTGAAACACTTAATTTGCCTTATGTGTGTAAGATT    | 19409 | A_95_P032856 EH619487     |
| 20044 | 236 | 69 | 786  | TTTTTGCTCGCGCCTTGGAGATGGCAAAGTTGTACCTGCCGTTTTTTGCGAATTA`     | 19413 | A_95_P202287 DW004236     |
| 20051 | 236 | 76 | 695  | TCTTGAAACAGAAACAAGAACCAAAACAACACAGAGTAGTTGTTGCTCATGAAAAC     | 19427 | A_95_P136567 EB440332     |
| 20059 | 236 | 84 | 615  | GTGCTATTTATTGTGACTATGCTTTGAGATCTTTGATATTGGTAGCTTGTGAGTTGAA/  | 19442 | A_95_P266866 FG636593     |
| 20061 | 237 | 1  | 541  | AGGAAGTAAGAAATGCTTAGACACTTGTGTTGGGTGTTGAGAGAACCAGGCCTGATA`   | 19445 | A_95_P042616 BP130405     |
| 20066 | 237 | 6  | 835  | TGGTGGAGTTATTTTGCCTCCTTAATGGTTACGATTTGCGTGTCTATAATTAAGTGC`   | 19455 | A_95_P244122 FG143242     |
| 20067 | 237 | 7  | 1247 | AGAGTAGTAAAGTGTATATTTGCGTTTGGTGTAAATGCATGAATTTGACTGTGTTCT    | 19457 | A_95_P202337 TA17612_4097 |
| 20068 | 237 | 8  | 345  | AAACTTATGGGTACTGCTGGTGGTCTCTCGTCATTGGCAAAAATGCCTGCTTGAATC    | 19459 | A_95_P135222 FG145825     |
| 20070 | 237 | 10 | 0    | CCTGATAAAACAAAGGCATCGCGCACAAAGTATGCCAAAATATCAGAGCAGGAGAC     | 19463 | A_95_P315973 A_95_P315973 |
| 20073 | 237 | 13 | 133  | CTATCTGTGCTCAATATACTCCTGAACAGACTGATGTACGATTTTAAAGCTATGTATG`  | 19469 | A_95_P161737 EH620364     |

|       |     |    |      |                                                             |       |                           |
|-------|-----|----|------|-------------------------------------------------------------|-------|---------------------------|
| 20074 | 237 | 14 | 215  | ACAGGCTAGAGATTACGCAGGGAACGTCTCGAGTCCCTGTTTTACTAATCAAACCA1   | 19471 | A_95_P166707 EH664006     |
| 20075 | 237 | 15 | 610  | GATTGCAAGCAACTTTACTGGGAGGGGACTCAATACCACAATGCAGTGCAAAAGTTT   | 19473 | A_95_P299058 FG638357     |
| 20086 | 237 | 26 | 372  | GTGGAGACTAAACTCATGTTATTGGAAGCTGTCATTTAACTGAAAAGTCTTTTGT     | 19492 | A_95_P089253 BP530421     |
| 20089 | 237 | 29 | 516  | GTACGGTTTTGAAAGATTCGGTTTTGATAATCCTTGGTGATTTTGAAAATGTTATACC  | 19498 | A_95_P193517 TA15690_4097 |
| 20102 | 237 | 42 | 599  | GAAGAGGGGTTTTGAACTGATTATTATGTCTTTGCTATTGTGTATTCATTGATTTT    | 19523 | A_95_P012776 DW004209     |
| 20103 | 237 | 43 | 2330 | GAGTAGGAAGGATGACTGATCACATTGTTTCAACAATTAAGTGATTGAAGAAAGAA    | 19525 | A_95_P002851 TA12429_4097 |
| 20104 | 237 | 44 | 350  | GGAAAAAGTAACTCAATTGGTTAAGTGGGTTTCATATGGCATTCTAAGCCATGAAGTT  | 19527 | A_95_P202812 TA17716_4097 |
| 20108 | 237 | 48 | 791  | TAAATCTTCTACCTCATTGAGTCTGATGCACACACGGGGTCAGATCTGTCCTCTC     | 19534 | A_95_P152292 EB682633     |
| 20110 | 237 | 50 | 545  | CAAGTCATTTGGTTTCATCTTTGGTGTCATTGAAGACTCTAGAAATCAATTTCCCAAT  | 19538 | A_95_P148797 TA13527_4097 |
| 20112 | 237 | 52 | 858  | TGAGTCGTCAACTGGTTTATCACGGATGTTGCTGAGTTCACCAACATGTCCAGTTCTT  | 19542 | A_95_P149317 EB679157     |
| 20113 | 237 | 53 | 478  | ATCAGTTCTCACAGCTATTTCTAGACAAGTTCATCCCTGTCACCCTGAGAGAGGAGTA  | 19544 | A_95_P048061 BP131811     |
| 20116 | 237 | 56 | 761  | TATTTCAAGGAAGTTTGGCACCATAAATTTGGTAGTGAGACTGAAATGCACCGCGCA   | 19550 | A_95_P290678 TC41333      |
| 20117 | 237 | 57 | 492  | AAGAAAGATGTTATTCTATTTTCAGTAGAGTGACGATCTTGTAACAAGGCACAACC    | 19552 | A_95_P153922 EB684086     |
| 20120 | 237 | 60 | 143  | TACCACTAGACGAGCTTGTTAAGCTCTTAAATGCTCGTCTCGCAAAAGTTCCAAAGG   | 19558 | A_95_P167251 EH664152     |
| 20121 | 237 | 61 | 747  | GCATGATTGCTTTGTCAATGGATGTGATGCATCACTATTCTAGACCAGACACCAAGT   | 19560 | A_95_P215292 EB428682     |
| 20123 | 237 | 63 | 1050 | CAGAAATTTACTGCTTGACAATTGCAAGTGTGCTTACATGTTTTCGCAATTTGTTGGT  | 19564 | A_95_P176862 TA11807_4097 |
| 20126 | 237 | 66 | 435  | GTGAGTTTTGTATTAGATTTATGCTTCCATGAAATGAATGCAATATTCTAGCTGGTGT  | 19570 | A_95_P137157 EB440883     |
| 20127 | 237 | 67 | 853  | AAATGCTTTTCACATCTCGTGCTCACATCATCTTCTCAGTTCATCTTGCAATGAGTCAG | 19572 | A_95_P313473 FG157322     |
| 20128 | 237 | 68 | 836  | TCAATGGTTCAAAGCCATACTTCTTTTTGAGTTTCTTTGTACAGTCGCAATCTTCCCC  | 19574 | A_95_P268191 TA18465_4097 |
| 20132 | 237 | 72 | 504  | CAGAGTGTGGGAAGAAAGCTTGTCTTATAGGTCAAGCATTGGAAATTAATTATTTT    | 19582 | A_95_P019401 DV160201     |
| 20134 | 237 | 74 | 1174 | CATTGTGTATCTGCTTCAGGGAAAAAGAACGAAGTCAATAATTTCTGGCCAAA       | 19585 | A_95_P231584 AB036735     |
| 20136 | 237 | 76 | 583  | GGTTTACTGACAAGCAAAGGAGCTTGTCTAATCAGGCATTACTTCCCATGGGCTCTA   | 19589 | A_95_P050941 FG168352     |
| 20140 | 237 | 80 | 266  | CGTGACACCGGGTCTAGTGAGATTATATTGTGTATTTGTAAATTTCTCAGTACTT     | 19597 | A_95_P029001 BP534488     |
| 20145 | 237 | 85 | 611  | CAATTCGAGGTTTGTGTAAGCCAAACCTTGCTAATGTAAAATAAAAAGAAACGCAG    | 19607 | A_95_P143162 EB446508     |
| 20146 | 238 | 1  | 1178 | TCTCTGATAAGATCATGTTCTCATTGGTTCACAGATACTGCATGGTTTTCTAATGTAGT | 19446 | A_95_P103942 TA15170_4097 |
| 20150 | 238 | 5  | 396  | TGTGCTTTGTCTACTGAGGTCTCAAAGATGTTCTATGCTATTTCTGTTTGTCTTTCTC  | 19454 | A_95_P006961 TA11842_4097 |
| 20152 | 238 | 7  | 484  | AAGGTCCAGCAATGTGGGAAAATTTAAAAAGTTCACTTCAATCCAGCTAAGATGATT   | 19458 | A_95_P044841 BP130986     |
| 20157 | 238 | 12 | 858  | GGGGTGAAGTTTGTATTTGCTGAAGTTCAGCATTCTAGGAGTTGAAATTTTTG       | 19468 | A_95_P126042 EB425236     |
| 20158 | 238 | 13 | 454  | TATTGACGCCTGCAATTTGTCCTCTGAAGATGCTGGAAGGAACCTAATTATGGTGAC   | 19470 | A_95_P058346 BP134454     |
| 20161 | 238 | 16 | 719  | AGAAAACATCTTTATGATCTCGGCGTATGATTCAATTACCATGTATTTAGCTATTGAG  | 19476 | A_95_P010056 DV161237     |
| 20163 | 238 | 18 | 784  | CAATGCTATGAAGTATGGATGGACTGTTTGCTTAGTGAAATGTGATTTCTGTTCTAAC  | 19479 | A_95_P135392 EB438786     |
| 20164 | 238 | 19 | 796  | CTTGAGGGCTCAACATTACAATTGTGTATTATCAACACTTTGTTTGTGTTGCTGCAA   | 19480 | A_95_P223817 EB683080     |
| 20166 | 238 | 21 | 870  | TACCTCTGACTGCAGTGATGAGAAGTATATTGTTTCAAAGAAATTTTTCAGTAGCAG   | 19484 | A_95_P009166 TA14865_4097 |
| 20168 | 238 | 23 | 387  | CGACGTCCTGATAATCGAGCAGAGTCACCTTCACTTTAGTCTATTGATGTTTGGAA    | 19488 | A_95_P151162 EB681401     |

|       |     |    |      |                                                              |       |                           |
|-------|-----|----|------|--------------------------------------------------------------|-------|---------------------------|
| 20179 | 238 | 34 | 474  | GCATGTTGCAAACCTCAAAAACCTACCTAAATGTATCACATTAGCAGAATAATAGCTGCT | 19508 | A_95_P026566 BP129594     |
| 20189 | 238 | 44 | 610  | GCCTGGTTTTGCTCTCTTTTAGAACACCACAATTACTATCTTTCATTACAAAAGGTTCT  | 19528 | A_95_P225152 EB445473     |
| 20195 | 238 | 50 | 581  | ATACGTACCTGCCTCCCTTGGATTTTTGTTTGCCTCATCATTTTTAATAATTTAGCTC   | 19539 | A_95_P191377 TA15222_4097 |
| 20196 | 238 | 51 | 1451 | GCCTAATGATAGAATAATTTAAGTGTACCCTTTGAAGCCGTGTTTCTTCTCTGATCA/   | 19541 | A_95_P182202 TA13158_4097 |
| 20200 | 238 | 55 | 753  | TTCACGGTACTTGGGACACATAAATCTCCAGGTGGCGACTCTGATCTTTATAATAAT    | 19549 | A_95_P300643 FG173876     |
| 20201 | 238 | 56 | 686  | GCTTGGATACTTGTGTGGTAATTCTGTCCGACAGTAACCGATCTTGTAGTTTACTGG    | 19551 | A_95_P164652 EH623917     |
| 20204 | 238 | 59 | 113  | ATGCTCACTTCAAGGTGGATCGAGAACTTCAGGCATCTGTTGCTGTGTATGCATTGA/   | 19557 | A_95_P034319 AJ718441     |
| 20211 | 238 | 66 | 704  | AGGGAGCTAGTACTAGTAATGCTACTAAGCCTTCTGATACTAACAGCATTACATCTAA   | 19571 | A_95_P129052 EB682225     |
| 20216 | 238 | 71 | 917  | CTCAATTAATGCACAGTTGAGAGTAAAGAATGTTGGGATGCGCTTAAGCCTTTGTCA`   | 19581 | A_95_P245802 DV157766     |
| 20219 | 238 | 74 | 0    | CTTTTACCATCAAAATGTAACAGAACAGAAAGAAAAATGACATCTCTCAACCTGGAG`   | 19586 | A_95_P029651 A_95_P029651 |
| 20220 | 238 | 75 | 193  | GTCATTGGGCTAAACTTAATATGAAGAAATCTACTGGCAGTACTTTGGGACATATTTG   | 19588 | A_95_P048841 BP132016     |
| 20223 | 238 | 78 | 1615 | GCATGGCTATAAACAAGGCGCTGCGAGAGATGAACAATTGTCAATCTTTTATATAA`    | 19594 | A_95_P208622 TA19009_4097 |
| 20225 | 238 | 80 | 712  | TTAGCACCCCTCTATGTCGTCTCATGTGACCACCTAAAGCTTGTCTGAGTTAAATTC    | 19598 | A_95_P316793 FG194848     |
| 20227 | 238 | 82 | 667  | CTTGTCTCTGATGTTTTGAGACCTTAGTCTGTTGTAACATGGAAGGAAATGAAAATA/   | 19602 | A_95_P018176 TA17448_4097 |
| 20229 | 238 | 84 | 880  | CTTCTGTATTACTGCATTTCTCATTGAAAATAGACTCGGGAATTCGGAATAGTTGTA/   | 19606 | A_95_P013461 TA12161_4097 |
| 20232 | 239 | 2  | 855  | GGTAAAGTCACTTTTTGTTGGCTTGAGGATGAGGAAAGGACAGAATGCATATGATTT    | 19611 | A_95_P297428 EB683457     |
| 20238 | 239 | 8  | 615  | GGGCTAATGCTACCTTTTTCTGTAAAATTAACATCAAATCCAGTGTGTCGATGCATTC   | 19623 | A_95_P253714 FG642800     |
| 20242 | 239 | 12 | 644  | CAATGGTCTAATCCCATGAAAGACACTAGTATCATGTTTTCCATAAAAATTGTTCTC/   | 19631 | A_95_P283873 FG639842     |
| 20246 | 239 | 16 | 901  | ATCATCATCAACCAACTGAATCTTGGTTTGGTATTAGTGACCAAGCGCTTATCACTC    | 19639 | A_95_P212627 TA19876_4097 |
| 20247 | 239 | 17 | 2483 | GTCTACCTTCACTCATGTACATGATAAGCATTGTACAGAACAGTTATGGTTCTGTTT/   | 19641 | A_95_P007301 AY046898     |
| 20248 | 239 | 18 | 1328 | GTTGGTGTGTCGTGTATGAATTAATCGCTTGGTACCTAAAATAGATGAATGTGACTTC   | 19643 | A_95_P182982 TA13349_4097 |
| 20249 | 239 | 19 | 1116 | TTCTGGTATTGCTGCACCTATGTTAGATGGGTTGTTGACATCCATTTGTGTTAGGTGG   | 19645 | A_95_P134227 TA15207_4097 |
| 20256 | 239 | 26 | 774  | GAACCTTCTGGACAAAGATGCCTACATTGGAGAGTACGGCACCAATTTGACAAAGTGC   | 19658 | A_95_P298173 FG137301     |
| 20259 | 239 | 29 | 785  | AATACGCTGCTGATGCTGTCTGCACAGTCTCGGGTAGACCAGATTATAATGTCAA/     | 19664 | A_95_P149437 TA15640_4097 |
| 20263 | 239 | 33 | 433  | TGTGTGGTTCAAGGCTGGATACCAAATCTTTAGCAGAGGGCGTTGGACTTTGACTAAC   | 19671 | A_95_P176527 TA11626_4097 |
| 20267 | 239 | 37 | 357  | TTTCCATTGCAGTTTGAATCCCTGAACCAGATATTTTCATGGGGTTATCTGTCTTCCC   | 19677 | A_95_P103537 CV016555     |
| 20270 | 239 | 40 | 357  | GCAAAGTGGCAATGTTTTAGCATATATGTTTCTCTCAATTTACCAACTCTATATATG    | 19683 | A_95_P074995 BP526612     |
| 20271 | 239 | 41 | 1109 | TTTCGAGGCATTTGTAACACTACTGAACGTCTGAGCTCTTGCCATCTTGTGCTGAAAA   | 19685 | A_95_P237344 U44760       |
| 20276 | 239 | 46 | 763  | TTCAGACTGCGCTGTAGTACTGAGCTAGGATTTCTCGAATTTTTATGCATCTTGCC`    | 19695 | A_95_P135147 EB438412     |
| 20279 | 239 | 49 | 409  | GAGCAAGCTTCTGCCTAATTTGCCTCTATTACTATTGTGACTGATTATAATGGAAGAT,  | 19701 | A_95_P003481 TA15496_4097 |
| 20283 | 239 | 53 | 669  | TTCTCTTTGATTTGATTTGGCTTTGTTTATATGTGTGAAGGCGTCCCGGCCGTAAT     | 19709 | A_95_P202687 TA17688_4097 |
| 20286 | 239 | 56 | 483  | AAACAGAGGTGCCGAAGAAAGCAAACCTGACACTGAAGCCCAAAAAGGTTGGAGCT/    | 19715 | A_95_P159417 EH617603     |
| 20291 | 239 | 61 | 489  | ACCAGTTACGCCAAGACTCCCTTTAAAAATAGCAAAGAATAAGACCAAGAAAATGT     | 19725 | A_95_P143647 EB446890     |
| 20303 | 239 | 73 | 594  | GGGAACTGCTTTTGTAGTGTGTTATTAATTTGTTAAGAGGCTTTCAGAACTGCTTT     | 19749 | A_95_P003711 EB439100     |

|       |     |    |      |                                                              |       |                           |
|-------|-----|----|------|--------------------------------------------------------------|-------|---------------------------|
| 20304 | 239 | 74 | 1204 | CTGATAAACAAAGCCATTGTGCTTTGTAACGCTTATTTGGATTTTGATTGTTACTCC    | 19751 | A_95_P208427 TA18967_4097 |
| 20306 | 239 | 76 | 563  | TAGGCCTACTATGATACTGATATTGTTTCAGGACTTCAGGTGTTATTACCGTTACGCTA  | 19755 | A_95_P203587 TA17884_4097 |
| 20308 | 239 | 78 | 791  | GCTGCAGATGTCTCTTTGTGATTTCGATATGGTTGTGATGACACCGAGGAAACAGTTC   | 19759 | A_95_P140412 EB444327     |
| 20312 | 239 | 82 | 496  | AACTAAATAGCGACGATCAGTAGTTTATAACACAATTACACTTCCCTCTCTCTGCTAT   | 19765 | A_95_P264411 AM782197     |
| 20315 | 239 | 85 | 614  | AAGTTTAATCACCCCTCCAGAAGAAAATACCAGCAGGGGACAAAGGAGAAGGGAAA     | 19771 | A_95_P147732 EB452258     |
| 20317 | 240 | 2  | 467  | CTACTCTTGTCCGATTTATGATCTTGTAACTCGGATCCTCTTCCACGAGGTATCCTGC   | 19612 | A_95_P164617 TA17325_4097 |
| 20322 | 240 | 7  | 205  | TAATTCAGTTTGATTGTGCATTAAGAACTATCAAATCCTGGTCCAGTGGATTTCTT     | 19622 | A_95_P023486 CV016449     |
| 20326 | 240 | 11 | 760  | AAACCCTAACCGGGAAACATCACCCCTGAAGTTGAAGCTCTGACACTATTGACATGT    | 19630 | A_95_P157738 EH615777     |
| 20328 | 240 | 13 | 618  | TGGGTGACCGTATAATGGCTGAAAAGTTTCATATATTTCCGGAAGCCTGAAGTTT      | 19634 | A_95_P151757 EB682012     |
| 20333 | 240 | 18 | 826  | ACGCTGTTGCAGGATCAGGAAGTGGTTTATTTCTCTTATCTAATTCGTTCCACTAC     | 19644 | A_95_P117277 DV160122     |
| 20338 | 240 | 23 | 333  | ATTTGCCTTTCAGTGATGTGGCTCTGTAATTGCAGGAATATGAGTTGTGGTTTATTAT   | 19653 | A_95_P101243 CB337256     |
| 20347 | 240 | 32 | 1209 | AGATACTGCATGGTTTTCTAATGTAGTTCGTTTAAATCTCTATTTAATCCTCAGGGTTC  | 19670 | A_95_P191167 TA15170_4097 |
| 20349 | 240 | 34 | 244  | CAAATTCGTGACACCGGGTCCCTAGTGAGATTATATTGTGATTTTGTAAATCTTCA     | 19673 | A_95_P089308 BP530445     |
| 20355 | 240 | 40 | 199  | AGCCTCGATTCTGATACATTGAGAGGTATCTGGGCGCATCTAAAGGTTTCGTATACCT   | 19684 | A_95_P088198 BP529984     |
| 20357 | 240 | 42 | 698  | TGCTGATGGAAGTGTTCTGTGGCCAATAAGCTATGAAGAGGTAGAATTTGATGAAA     | 19688 | A_95_P196632 TA16381_4097 |
| 20359 | 240 | 44 | 646  | GTCGCTGTGCCTCATTATCTCCAAATTTATTCATTACATCAATCAAAGGTGATTTTCT   | 19692 | A_95_P207472 EB683911     |
| 20361 | 240 | 46 | 762  | ATGCGATTTGCATTTGGCTTTAGGTACGTAACGTCGTGACGATCGATATGGGTTTGT    | 19696 | A_95_P286868 FG166173     |
| 20366 | 240 | 51 | 434  | ATTCTCTCTCTTGGGTCTGAAAATGTCAACTATGATACTTGGACTTTGCTGAATGAT    | 19706 | A_95_P220757 TA21677_4097 |
| 20373 | 240 | 58 | 740  | CAGATTTGGGGTCAGTTCTGTTTCTGTTGCCGATAATCTTATTTTTTGCTACTG       | 19720 | A_95_P254014 EH616635     |
| 20374 | 240 | 59 | 625  | AGAAGTGGCGTTTTAGTGCGCTTGCACCTCTGCAGTTTGTCTCTCTATTTTCT        | 19722 | A_95_P302413 FG637459     |
| 20377 | 240 | 62 | 412  | AGGGGGATGTCCTTATATGTAGTCTTCCACGTCAAGTTTGAAATTGGTTGATGAGA     | 19728 | A_95_P084890 BP529140     |
| 20378 | 240 | 63 | 240  | TCCAGTAGGCAGCTTTAATTGGTTTGCAACTCATGGAACCTTCTATGAGTCGAACTAAC  | 19730 | A_95_P155307 FG140044     |
| 20383 | 240 | 68 | 490  | AAGGGTGGTTGGAACCTTGGCTACATTGATCCTGAATATTATAGAAGCGGACGGCT     | 19740 | A_95_P145957 FG144874     |
| 20384 | 240 | 69 | 532  | TGCATCTTCCCTCGTAGAGTGGCGTCTTTATAAGAAAAGACTTTCTCAGTGGAAC      | 19742 | A_95_P148817 EB678356     |
| 20386 | 240 | 71 | 859  | CTGAGAACTAAAGGTTTATGTTGGATATCAATGTTAAACGCATGGATGTTACTGCTTC   | 19746 | A_95_P268136 DV999599     |
| 20389 | 240 | 74 | 484  | TGAGCAGAATTGCTGCTCTGTGCCATATTTTCTGTTACCACTATACAAATGTATACTA   | 19752 | A_95_P154062 EB684227     |
| 20391 | 240 | 76 | 222  | GTAGTGTTAATGCCCTAATGGCACTGAATTGAGATTCTGATATCCGGATTAAGGTTA    | 19756 | A_95_P104142 CV016866     |
| 20396 | 240 | 81 | 888  | CTAGACTAGATACCATCTCATATCATGTATTAATAATTCATCATCATCTCAACGTGAACC | 19764 | A_95_P022391 EB678149     |
| 20411 | 241 | 11 | 878  | CTTACAGTGGACATTATCGGCCGACGGATGATAGCCTTGACAGTTTTTTATCAATTCT   | 19793 | A_95_P206897 EB426751     |
| 20414 | 241 | 14 | 979  | TGAAGATGGTACACCTGCTACTGAGGCACAAATGGGAAAAGATGTTGTGTCGTTCTT    | 19799 | A_95_P011036 TA16055_4097 |
| 20417 | 241 | 17 | 367  | GCCAAAGGAAGAAAGTGATGATGATATGGGATTCAGTTTGTTCGATTAGAAGCTGT     | 19805 | A_95_P103138 TA13775_4097 |
| 20418 | 241 | 18 | 1940 | TACTTGCATGGCCAGTTACAAAGTGAAGCTTATTACACCAGAGGGAACAGTTGAGTT    | 19807 | A_95_P103342 AF223573     |
| 20421 | 241 | 21 | 481  | CCTGTTGAGTTGAATTGCAGGAAACAGAAAGCGAAGAAGAACTTCTTGATGATGA      | 19813 | A_95_P003561 FG164295     |
| 20422 | 241 | 22 | 1772 | TTGTCTACAGACACAGATATGATGCGAAATAAATCCTTGTGCCTTCAATTTATCTGT    | 19815 | A_95_P014391 Z29492       |

|       |     |    |      |                                                             |       |                           |
|-------|-----|----|------|-------------------------------------------------------------|-------|---------------------------|
| 20427 | 241 | 27 | 759  | GATTACAGAAAGAGTGACTAACACTTATTTT GCCAGAATAAACTTCCGCAAGCCAGG  | 19825 | A_95_P141512 EB445207     |
| 20431 | 241 | 31 | 304  | GAAATATCCCCTTTGGCACCTTCTTGTTGTAAGATGAGGAACCAGAAACCTTTATTA   | 19833 | A_95_P081095 FG132709     |
| 20433 | 241 | 33 | 410  | ACAAAATTGTTGTGCAATTCCTAGATTTGTAGTCCCTTTGTAATCCAATTTCCCGAGT  | 19837 | A_95_P309028 FG644418     |
| 20439 | 241 | 39 | 605  | TATCGGCTCTTATAGTTTGTTCACCAATCCATACCATGGTAAATCGGGTTCCTTTG    | 19849 | A_95_P021016 TA18651_4097 |
| 20440 | 241 | 40 | 98   | GTAACCTGAAAAGTGACAAATAGCCAGTTTGTACCTTCATAATAACCAGTGACAAAT/  | 19851 | A_95_P220652 TA21653_4097 |
| 20444 | 241 | 44 | 415  | TTCTTTTGTGTAGTAAACACAGTAAAGCTAAAAGGAGCAAATGATTGGCTGGTTCTT   | 19859 | A_95_P017951 FG636272     |
| 20445 | 241 | 45 | 590  | CACTCTAGTTTCTAGGGTTGTGGTTGACATGATTATTAATGTTTACTAACTACATCTTC | 19861 | A_95_P019931 TA22171_4097 |
| 20450 | 241 | 50 | 515  | ATCCTAATATTCGTTGTGTAGCTGCCACAAATGAAATGAAATCCGTTGGTTCTTTT    | 19870 | A_95_P307063 FG637219     |
| 20454 | 241 | 54 | 364  | TTGTGCAGTAATACTACCTTACAGACGCTGCTTCTCTGTGTCTGATAAAGCC        | 19878 | A_95_P242132 AJ719117     |
| 20462 | 241 | 62 | 608  | CCTGGCTTTGCTCTCTTTTAGTTTTAGAACACCACAATTCATACAAAAGTTCTTTTTT  | 19894 | A_95_P209932 DW001479     |
| 20463 | 241 | 63 | 401  | GAATCTGCTCGTTTCTGTAATCGAGATTTATTTTCTTCATTGTAGACTAGAAGGAGCT  | 19896 | A_95_P143892 EB447083     |
| 20467 | 241 | 67 | 2243 | CGTTCATTCTTGAAGACATGTATAGAGACATTCATCAATTTAGAGTTGGAACTTTTG   | 19904 | A_95_P008446 X60057       |
| 20469 | 241 | 69 | 782  | TCTTGCTGATTTAATTCCTCAGTAGTGACATGACGCGGCTTGTCAATTGATGCTTGT   | 19908 | A_95_P232774 EB449667     |
| 20473 | 241 | 73 | 208  | TCCTATTACTTTGTATCCGCCTCGCACCATGTCTTTTCAAGAATACTTGGCACTACGA  | 19916 | A_95_P108902 CV019054     |
| 20476 | 241 | 76 | 371  | TCTTGGCTGTTAGAAGGGTAGGGGAAAAGCTTCTTTTTCTCTGTATTTTTCAGTTTTA  | 19922 | A_95_P067450 BP136869     |
| 20477 | 241 | 77 | 446  | CTCTATCAGGCACTGCTAAGTGCTTGCATAGTCTGTGTTTTTATGTAAGCTTAATTA   | 19924 | A_95_P134702 EB437373     |
| 20478 | 241 | 78 | 117  | TTACAGGAGGCTGATGAAGGTAGGAGTTTGTGAAAGGAAGAATGTGGTAAACACGC    | 19926 | A_95_P031496 CV507122     |
| 20479 | 241 | 79 | 684  | TATCAAAGAAGTTGCTGATGCTGCTTCTTGATTCAGGGGCTCTTCGAGTGTCTATCAC  | 19928 | A_95_P231539 FG643775     |
| 20487 | 242 | 2  | 820  | ACGATAGAGATGATCTGACGAGCACTGAGATGACTACGAGACAACGTTGGTGAGAT    | 19776 | A_95_P303138 FG159394     |
| 20490 | 242 | 5  | 457  | GCTACAGAACTTTTTTCTTTACAAAGATTTCTATTAGTACCCTGTACGAAGTCCCGA   | 19782 | A_95_P062095 BP135425     |
| 20491 | 242 | 6  | 352  | CATTACTTCTGAGACTTGACTTGTCTTTCAGTTTTTTAGATACAGGGAGTAGTATACT/ | 19784 | A_95_P028731 BP532761     |
| 20493 | 242 | 8  | 315  | GATGGTAGAACAAGGGAACGTTTTTGAGTTTGTGCGATTGTAATTGCTACTTGGTCTA  | 19788 | A_95_P142257 EB445774     |
| 20496 | 242 | 11 | 851  | GAAGGTTGAGCAATTGTGTTTGTGAAATAATACATAAACCCAGGACGTCATTTCTA/   | 19794 | A_95_P197832 EB432554     |
| 20498 | 242 | 13 | 529  | CTTCGTTGACCTTGACCCCATAGTGTGATTGCGTGTTTTAGTATCTACGGGGAAAATT  | 19798 | A_95_P055556 BP133729     |
| 20501 | 242 | 16 | 589  | TCTTGAATAAATCCCCTGTTCAACCTATGATGGGGGGCTAATATCACCAAGTCTTGTG  | 19804 | A_95_P192822 TA15539_4097 |
| 20502 | 242 | 17 | 916  | CTCAGCGGTGGATTCAAGCTTTCCTTGATAAACTAGTGATCTGAAATTTTTCTGA/    | 19806 | A_95_P011521 TA17424_4097 |
| 20503 | 242 | 18 | 607  | GAATAAAAATGTGTTCCGGATTGCGGGTGCATTATGTGACGTAATCCAAAGACATG    | 19808 | A_95_P069130 BP137303     |
| 20504 | 242 | 19 | 546  | TTTTGTATGGCACTCTGGTGGCATACTTCAACATGAACTATTCCCAATTTGAATCG/   | 19810 | A_95_P059820 BP134838     |
| 20507 | 242 | 22 | 1444 | TTGTTGACGATTGCCAATGTTCCCCTGCTGATTATGAATTATCTTCATTAGTCTTCAT/ | 19816 | A_95_P120322 AJ438264     |
| 20509 | 242 | 24 | 533  | AATCAAGCATTGAAAAGGCCATTTAGGGATTAACCTTGCATTTGTGTTGCCGATTC    | 19820 | A_95_P130102 EB430102     |
| 20510 | 242 | 25 | 808  | TATCAGTTTGGTTTGGTGGCCTGACCGTCTCCATCTGTATCTTATTGGCACAAA      | 19822 | A_95_P223852 DV159414     |
| 20511 | 242 | 26 | 752  | GCAAGTGAATGCATATGGACAATGAACCCTTCTATGGCTGTATGCACAGCAGTTGT    | 19824 | A_95_P145722 TA14842_4097 |
| 20514 | 242 | 29 | 1354 | CCAAACTGTTCCACTTGTGATCATATGTGCGATCATATGAAAATGACAAATATTACTG  | 19830 | A_95_P012141 Z84821       |
| 20517 | 242 | 32 | 811  | TTGATCACACAATCAATGTATGATAAACAATTAGACAGTGGACGTGGTACACTTTTGC  | 19836 | A_95_P153157 EB683472     |



|       |     |    |      |                                                             |       |              |              |
|-------|-----|----|------|-------------------------------------------------------------|-------|--------------|--------------|
| 20521 | 242 | 36 | 723  | AGCGAGTTCCTTTTCATGAGATTTGTATATTGTTGGTCCCTGTTTACTCTTGAGTTGTG | 19844 | A_95_P183012 | EH619479     |
| 20522 | 242 | 37 | 885  | CAATGTAAATGCTCTCCGTTTGTAAGTTTCCCTCTGTTTTTATGAGTTAACTATGCTC  | 19846 | A_95_P020296 | TA16759_4097 |
| 20528 | 242 | 43 | 264  | GTTTCATGAAGACCTTAATGTACCTGTGATAACAATGATACCTGTAATCCTAAGCTTCT | 19858 | A_95_P142107 | EB445660     |
| 20533 | 242 | 48 | 1526 | GGTCTATGTTGCCATTCCCTGGCTGCAAAACTGTTTATCAAAGGTTGCTATGGCATG   | 19868 | A_95_P007976 | TA14794_4097 |
| 20536 | 242 | 51 | 688  | GCCAGCGCACTTTGGTGTGAAGATAGCTTCGAAATCTCTGTTAGGAGTTATTCGTTTC  | 19873 | A_95_P125687 | EB424762     |
| 20538 | 242 | 53 | 253  | GCAGACAAGTTTTCGATTGCTTTCATATACGTGTGGTTAGCACATCTCAACTATTATT/ | 19877 | A_95_P155502 | EG650107     |
| 20540 | 242 | 55 | 768  | CCAGTATTGTTGCATTTTGGTGCTTGCTATGCGTCTTCAGCAAGGCGATGTATCTTT/  | 19881 | A_95_P128557 | TA13632_4097 |
| 20543 | 242 | 58 | 263  | CACAGCCTTGAGACAGGAAGTTGATGATCTTCTGGAAGTAATTGATGAGATATAATT   | 19887 | A_95_P033924 | AJ717916     |
| 20544 | 242 | 59 | 601  | CGCGCACACATGAATCTACAATTGACAAAAGATTTCAAGAGCAGATGGCTACGATGA   | 19889 | A_95_P232724 | BP128844     |
| 20546 | 242 | 61 | 562  | TTGTTGTGAAGTGTAATTGGATAAACTCCATCTAAAGTCCAGTTGACACTTTGAA     | 19893 | A_95_P017706 | TA12424_4097 |
| 20547 | 242 | 62 | 529  | CTATGCAGTTAAAGGACAAGTGTGTACGAGATATAGCGTTGAGATGTAGATGGATG,   | 19895 | A_95_P144202 | EB447365     |
| 20548 | 242 | 63 | 1163 | CTTGGGATTGAGCCCCTAGATTCAAAGCAAACTGAATAAGTAACACATTGCTATTTCC  | 19897 | A_95_P195282 | TA16082_4097 |
| 20550 | 242 | 65 | 142  | CATCGGCACAGATTGCATACTTGAATGCTCTTCGTTTTGGGCTCAAGCGCATTATATT  | 19901 | A_95_P111167 | CV020080     |
| 20551 | 242 | 66 | 375  | TGTGGTTGCCTATGCAAAGATATGTCCGGTTAACATGCTTTAACACAATTCTTTCAATT | 19903 | A_95_P094848 | BP532899     |
| 20555 | 242 | 70 | 117  | GGTCTTTTTTGCATCGGTGGTGTAGAGGGTTACAACTTGTTTGTAGTTGCCTTGCTA'  | 19911 | A_95_P119292 | EB438473     |
| 20557 | 242 | 72 | 871  | GTAGCTTTGGGTTTGGTGGTGTAGCAGTACATATTCAATCTTATTAAGAAGTTA      | 19915 | A_95_P183347 | TA13438_4097 |
| 20560 | 242 | 75 | 836  | AACTGAGTTGGCATGTGACCTTTAGGCGGTTGCATATGGCCCTTAATACCTAGTGAA   | 19921 | A_95_P268111 | DV999555     |
| 20561 | 242 | 76 | 234  | AGGAACGTGACAAGATAGCGGTTGGTGTGTTCTCTGTGAGATAGAACTGACAAA      | 19923 | A_95_P208637 | EH665894     |
| 20565 | 242 | 80 | 497  | GCGGATAATGTCAGAGCTATTTATTGGCTTCAAATTCACATATTGGAECTATAGACCT  | 19931 | A_95_P022386 | TA17015_4097 |
| 20568 | 242 | 83 | 83   | GCGTGTTAAATAAACGTTGTGGTTGTGTTTGAATAGATTTCTCTGACCAACATTTGC   | 19937 | A_95_P211777 | TA19687_4097 |
| 20569 | 242 | 84 | 399  | CAGAATTACTCTCCTTGAATTCCTTTGGTCTTCATGTTTGTATAACTACGAATACTCC  | 19939 | A_95_P022861 | EB434552     |
| 20575 | 243 | 5  | 191  | GCACAGTTTTGAATTATATTAACGGTAACAAGCTTAATATTGACTCAGACCTATTGC   | 19950 | A_95_P052291 | BP132884     |
| 20576 | 243 | 6  | 687  | GATCAAAAAATGGAAAGAATGCCCTAAGTGCAATCCCATTGTGGAGAAGGTTGATG    | 19952 | A_95_P255359 | EH614541     |
| 20579 | 243 | 9  | 658  | GTCATGGTACGGAGGTTTGAATTTGGTAACTGCCTAATAAAAAATTGCTATGTCTTTC  | 19958 | A_95_P000846 | DV999474     |
| 20583 | 243 | 13 | 795  | TGAGCCACTACTAATTTTGGGGACATCCTGTGTTTGCAAAAGAAGTGAAGGCAGTCC,  | 19966 | A_95_P250327 | DW005132     |
| 20585 | 243 | 15 | 553  | ACTTTTGGCCAAAAGGAACCAATTTGTTGTGTGCCTCCTGGTGTGGAGGCAAAATC'   | 19970 | A_95_P005956 | BP134460     |
| 20587 | 243 | 17 | 674  | GTATTGTGTATATTTTGCCTTCTGTGCTACTGGAAATCGTACATAACACAATATA     | 19974 | A_95_P135327 | EB438720     |
| 20590 | 243 | 20 | 603  | CACTTATGACATTCCTGTGTTCTGAGTCTTTTATTGCCAAGAAGAAGGTTCTAGCC/   | 19979 | A_95_P220192 | TA21557_4097 |
| 20593 | 243 | 23 | 362  | CTACAAGGATAGCACTTTGATATATGACAAATTCCTCGTGATAAACTCACTTAGTGGA  | 19985 | A_95_P110873 | CV019944     |
| 20594 | 243 | 24 | 466  | ATCCGACTAGCCAAGAAGAATGGTAAAAGACTTGATTACTTGCTTGATATCAACTT'   | 19987 | A_95_P114172 | EB432747     |
| 20599 | 243 | 29 | 895  | ACCTGAAATCTGGTAGAGACATGGTGGAGAACACACATATCGGTGATTGGTACTCTC   | 19997 | A_95_P010941 | TA15436_4097 |
| 20602 | 243 | 32 | 918  | TGGATTCACAACATTGGTTATTTATAAGACGTCATCTTGAAGATGTTGCTGTTACG    | 20003 | A_95_P011591 | TA14999_4097 |
| 20605 | 243 | 35 | 564  | GCTATGAACTAAGTTGTTGTAACAGTAACTTGCTAATGTTGGCTTCTGCTGGTTT     | 20009 | A_95_P246422 | EH623514     |
| 20606 | 243 | 36 | 552  | GCACATTGCGCCGTATAGCTTATACATGATGTTTTCTATCTTTTCTGCAACATTAATT' | 20011 | A_95_P142437 | EB445895     |

|       |     |    |     |                                                             |       |              |              |
|-------|-----|----|-----|-------------------------------------------------------------|-------|--------------|--------------|
| 20608 | 243 | 38 | 789 | GTGCATTCTCTATTACGGCTGTGTTTTCCCTCTATGTTTTCGAAATGTCTTTGCTTCCA | 20015 | A_95_P258276 | EH618193     |
| 20609 | 243 | 39 | 743 | ATTGGTGGTGTACTACTACCAGTGCATGTTGGAATTGGAATAAGATTAGATTTACT    | 20017 | A_95_P180872 | TA12845_4097 |
| 20616 | 243 | 46 | 765 | CTTTAGAGAGGTATGAAGTCAGAGAGAAGAAGACTTCCAAAAGAGACCAAGAGG      | 20031 | A_95_P126312 | EB424807     |
| 20619 | 243 | 49 | 547 | TGCCGAATCCTTCAGTTTTGGTTGAGTCACGCAAATTAATTTGCTTGTTATGTGCT    | 20037 | A_95_P121382 | DW001420     |
| 20622 | 243 | 52 | 573 | CATATTCCTGAGATCCTTTTTAGTGTTGTATTCTGTAGGATTTCTGGGATTCTATGAG  | 20043 | A_95_P153357 | EB683643     |
| 20627 | 243 | 57 | 874 | ACTTGTGATGGTACAACCTATTTGGGAAGCACCAACAACTTTGAACACTTACACTATC  | 20053 | A_95_P244292 | EB425283     |
| 20629 | 243 | 59 | 424 | GAGAGAAGATTAGGTGGTGTCAATTGGCTTTTTCCCTAGGAGAAGTTTGAACCTAG    | 20056 | A_95_P027996 | TC61180      |
| 20636 | 243 | 66 | 869 | TGTGTGAACCTTATGATCATGATGACTCTTATCTGTCCCTAGTTCTTATCATACTCA   | 20068 | A_95_P183672 | EB425023     |
| 20640 | 243 | 70 | 909 | AACTTGTTAATAGCCTCCAATCTTAGACGATGTTAGTGTTCTGCAATTGTTGTAAC    | 20076 | A_95_P292613 | EB427773     |
| 20641 | 243 | 71 | 154 | GTAAATCTTCTTTGTTATTGGTATTCTCAGTTAAGTGGGGAAGATTTGGTGATAGGC   | 20078 | A_95_P024881 | FG626149     |
| 20642 | 243 | 72 | 747 | AATTGAGGTTTTTCAGGACATATATGAGTTGAGCACATAGACAAGAGTGAAGCTCCT   | 20080 | A_95_P014146 | DV158160     |
| 20643 | 243 | 73 | 129 | CAACTGTACGTCAAAAAATGCAAGCTGAAATGCAAGCTGAGATGAGTCGAAAGTTG    | 20082 | A_95_P090033 | BP530774     |
| 20644 | 243 | 74 | 508 | CTACTTTGACTTATTACCTTGTTTTGTTTTACCTTGAACAAAAAGGGATTTGCTGCCA  | 20084 | A_95_P240895 | FG642146     |
| 20649 | 243 | 79 | 713 | TTCTCAGACAGCCACCTCTCATCCACTAATTCTAGTAAGTTATTGTTACTAGATTTCTG | 20094 | A_95_P295628 | EB447232     |
| 20650 | 243 | 80 | 175 | GGTTCACGGCTCAAGGTTCAATCCTTGTTTTCAACTTGAAATTCAAGAAAGTATTGAT  | 20096 | A_95_P092348 | BP531758     |
| 20651 | 243 | 81 | 271 | TTGAAAGAGTGGGAAAGTCATAAATTCGATTAGAGCCGAGATCCAAGGCCAAGGT     | 20098 | A_95_P056111 | BP133874     |
| 20655 | 243 | 85 | 453 | GTACTACTCATTAGGGGATTAACCTTTGTATAAATGAGACTCTCTTAGTTTGCTCC    | 20106 | A_95_P012706 | CV020046     |
| 20656 | 244 | 1  | 958 | GGTTTACTGCTTTCGTTTTGAATCTATTGTCATACAGTTAACTACCCTGTGTTGGATA  | 19943 | A_95_P251907 | AB079021     |
| 20661 | 244 | 6  | 590 | TCAAACAGCTATGTAAGTTGTGCTTCTCACTCTCGGATATCTTAGTTTTGGTTTTGCT  | 19953 | A_95_P205032 | TA18194_4097 |
| 20662 | 244 | 7  | 530 | GAGGTACAGTTCCTACTATTGAGAACTTTCAAATGCTTGTAGTCGCTGAAATTTGTGA  | 19955 | A_95_P254804 | EB444586     |
| 20663 | 244 | 8  | 116 | ATTGTCTACCAGAAGTTTGCTAGGAGTTCCTTCTGTGGGTCTCCAAAATCTGTTCTGC  | 19957 | A_95_P148612 | FG645419     |
| 20668 | 244 | 13 | 782 | CGTTTCACCGACGGATGCAAGAAGATGCGATAATAATCCCAGTGACAACCATTGAGA   | 19967 | A_95_P271041 | EB449152     |
| 20671 | 244 | 16 | 538 | CACGAATGGAAGGATGCTGATATCTGTTGTTTTCAATCCAATGAAATATGCAGACGA   | 19973 | A_95_P264556 | FG638865     |
| 20675 | 244 | 20 | 353 | GGCTGTGATGTATGATTTGTTGAAAAGTGAAGACATTGCAGCTATTTATGTACCTA    | 19980 | A_95_P108037 | CV018643     |
| 20682 | 244 | 27 | 100 | CCAATAAGGGAACAATGTTCTGCTAACTTGAAGTCTAGCCTATGCAAGGCTTTTTGAT  | 19994 | A_95_P100798 | BP535522     |
| 20683 | 244 | 28 | 127 | TACAAGGGTTGCCCTTCATAAAGCAAGTAAACAACCGCTTTAGGCCCATATTTGT     | 19996 | A_95_P131282 | EB431443     |
| 20690 | 244 | 35 | 515 | TCATTGATTTGTACCAATCTGTAAACGAAGTGCAACTTTTCAGAGATTACGGTTTTGTT | 20010 | A_95_P096178 | BP533507     |
| 20695 | 244 | 40 | 230 | GTGGTATCTCTTATTACGGCTACAATCAGAGAAAAGTCTGTAAAGTGATAATATCC    | 20020 | A_95_P107912 | CV018587     |
| 20700 | 244 | 45 | 320 | GCAGTATAAGAAGTACTATTTTGAACATGAGGGACACAAGACCTTTATTTTTATCTGC  | 20030 | A_95_P097313 | BP533981     |
| 20703 | 244 | 48 | 611 | ATTCTCATGATTCTCAAATCAGGGTGAAGGTCAATATGTACATGTACCAAGTATTT    | 20036 | A_95_P300243 | FG635635     |
| 20705 | 244 | 50 | 494 | CGCCTTCTGTTACGGAAGACTATATATATGAGTGCTAAGTTAATATTTTACAGTCT    | 20040 | A_95_P021721 | EB443875     |
| 20707 | 244 | 52 | 563 | AAGGATTGGTGCTGCTACTACTCTTGAAGTCAGAGCTACAGGGGATTCCTTATGCAT   | 20044 | A_95_P069500 | BP137402     |
| 20709 | 244 | 54 | 262 | ATGAAGGCTCTTCATGTATCTCCGGGAAAGAGAGAGTAAAGAAGGAAGTGATCA      | 20048 | A_95_P145022 | EB448561     |
| 20711 | 244 | 56 | 869 | CGTGCCATGATGTTTGTAGTCTGTGCATTACTTTAACATAAATTTGACCATCCTAC    | 20052 | A_95_P267056 | DV158046     |

|       |     |    |      |                                                             |       |                           |
|-------|-----|----|------|-------------------------------------------------------------|-------|---------------------------|
| 20714 | 244 | 59 | 576  | GTGGAAAAGAAGGTGCAAGAACAATTTGCTACTTTCATGACCAGAATGCACATGTAC   | 20057 | A_95_P098543 BP534540     |
| 20715 | 244 | 60 | 831  | TCATTTAACTCTTTTTCTTCTAGTTGGACTATAGGTACCGAGGATCAGTCAGTTTCCAG | 20059 | A_95_P226949 EB449952     |
| 20719 | 244 | 64 | 899  | TGCATCTACCCTAAATGTTTTGACTAGGCGCTGCTGCAGGATGGCTGAGTGATATAT   | 20066 | A_95_P222702 TA22091_4097 |
| 20720 | 244 | 65 | 384  | GTATTTTCATAACCATGGGCAAAACTAGGGGTTTTGAGACCGCAATGGCTTCCTTCTC  | 20067 | A_95_P158377 EH616362     |
| 20722 | 244 | 67 | 858  | TGCTATTCATAATACGTAACTAGCAAATTCATGGTGGAAAGCTTAAATGTGCATTG    | 20071 | A_95_P022366 TA11832_4097 |
| 20726 | 244 | 71 | 2390 | CTTCCCTGTTGTACTGTCTGGGGCATTGGTATCATCTTAGAATCAGCAGAAAGA      | 20079 | A_95_P063445 AM851007     |
| 20728 | 244 | 73 | 581  | AGATTCTTAAAGTCCAACCAGAGAATTGTTTGATCGACCAATAAGGAACAGATTATT   | 20083 | A_95_P196702 AF211537     |
| 20730 | 244 | 75 | 442  | GGCAGTTGTTTTCAGTTTGACAGTTATATTTGTATATGACGAGAGACATCTTAAACCTC | 20087 | A_95_P306398 FG635140     |
| 20737 | 244 | 82 | 770  | TAAGAGACATGTATGACCAGAACATCTGGAAAGAGTTGGAAAGGAAGCCGATGCC     | 20101 | A_95_P297973 EH615487     |
| 20742 | 245 | 2  | 428  | ACTTATAACTTACGTACAGGTTCCGAGCCTTGCCTCATGCGAACTAAGCCTGGTATTT  | 20110 | A_95_P036803 BP128827     |
| 20747 | 245 | 7  | 774  | TTACTAGAAGGCGAAGAAGTTGAAATCCTTATAGGCTGTAATAAATGTTACCATATG   | 20120 | A_95_P177932 TA12106_4097 |
| 20749 | 245 | 9  | 883  | AGCTGATGGAACAACCTTAAAAATCTTCTGTTTCTCTATAAGTGGGCAAGATGGCA    | 20124 | A_95_P202577 EB427823     |
| 20750 | 245 | 10 | 638  | ATTTTCTGGAATACTGGGTTGGCTTTGTTTTGGCATCAATTCATGCCCCACTACAGT   | 20126 | A_95_P300228 FG643798     |
| 20751 | 245 | 11 | 839  | AAGGTACAAGAGGAAATCACCCGTGAATTTGCTGCAATCATGGCAACTGGAACATTC   | 20128 | A_95_P246067 EB428701     |
| 20752 | 245 | 12 | 697  | CGGGTTTTGGGATAGTCTAGTTGATGTTACGGAAGTGCATAACATTATCACTTTTGT   | 20130 | A_95_P205962 TA18404_4097 |
| 20760 | 245 | 20 | 379  | TCAAGATGGCAAATGATTGCATTGGTCCAGACGTTGAGAAGATGGTTCATGAAATAC   | 20146 | A_95_P048036 BP131804     |
| 20761 | 245 | 21 | 1550 | GCTTAACTTACATGGTGAGATTGTTGAGGATTTCTGAGACTGAGGGATGTCTATAA    | 20147 | A_95_P022311 TA15002_4097 |
| 20762 | 245 | 22 | 443  | AGCCAGAGGGATAGCTGCATAAGCTGAATTATATGCCATTTAATCCATTCAAGTACA   | 20149 | A_95_P021361 EH615846     |
| 20769 | 245 | 29 | 828  | AATGCATACAGCAGTTTCTCACTTGCCTTACTTCATTGCCAAGGCTAATCACATCTATC | 20163 | A_95_P127427 EB426979     |
| 20770 | 245 | 30 | 448  | AAGTTCCTCTAATTCCAGTTCTCTTCCAATTCATGATGCTGCTGAGCTTGAATCC     | 20165 | A_95_P026631 BP533680     |
| 20771 | 245 | 31 | 628  | ATGGTAATAAGAATTCAACAGTTCGCTGTTGCTAGCTGTGGAAATATTGGTGTGGC    | 20167 | A_95_P058191 BP134415     |
| 20775 | 245 | 35 | 599  | TTGTGTCAATTGCTGCTCCCCGGATGGTTGTTAATTTATTGAAATTTCATACATTCT   | 20175 | A_95_P186752 TA14193_4097 |
| 20776 | 245 | 36 | 876  | CATAATCCTGGAGAAATATGAGTGCATTTGCCATGATAACTGTAGAAATTGATCCTA   | 20177 | A_95_P270416 EB677719     |
| 20781 | 245 | 41 | 584  | TTTGCTTTGTAATCTGAGCTCGAGATCTTGTGAATTGGAAATTGCAGTTGTTTGAGGT  | 20187 | A_95_P202997 FG645282     |
| 20782 | 245 | 42 | 402  | CTCGTCTTTTATTACCATATGCCCTATTCTGAAATTTGCTGACATGTAATTGGATAA   | 20189 | A_95_P120777 TA14883_4097 |
| 20783 | 245 | 43 | 701  | CTGGCGGCTTCTGTTCTTTGGGAAGTTGAAATGCTATATGAATATTATTTTGAAGAA   | 20191 | A_95_P195187 EB425378     |
| 20786 | 245 | 46 | 486  | GCATCTCAATTCCTGGAACCTTCCGTGTTGCAACTGAGAAAAGTGTGTTTGGCCACAC  | 20197 | A_95_P066485 FG199650     |
| 20791 | 245 | 51 | 735  | CAAGAATTTGCTTATTGTCATTTACCTTCTCTTAAGGAATGAGGAAACCACATTTTC   | 20207 | A_95_P216652 EB435837     |
| 20792 | 245 | 52 | 1091 | CGTTGTTTCTTGATTATTTGTTCTTCAAACTGTGATATGGTCATTCTGTCTAGTGCA   | 20209 | A_95_P183532 TA13481_4097 |
| 20793 | 245 | 53 | 1394 | GGTGTGCATTAGTCCCTTTTCTTTTCAATTTTGAATAATCAGTTCAAGTGGAAAGAAT  | 20211 | A_95_P019516 TA13916_4097 |
| 20812 | 245 | 72 | 792  | TTGGGAGGCTAAGGAATACGGATTGGTTGATGCTGTTATCGATGATGGCAAACCAG    | 20249 | A_95_P216977 TA20825_4097 |
| 20813 | 245 | 73 | 786  | TCATTCTGCATTTTCTGAAGCCTGAAGAACAGTTGACATTTTTCGCAAGCTATGTGGAT | 20251 | A_95_P289578 DV160054     |
| 20817 | 245 | 77 | 702  | TTTTCGTCAAGGGAAGTACATTGGAGGAGCTGAGTTATCAAGCAAATGAACGAAGT    | 20259 | A_95_P220177 EH616351     |
| 20820 | 245 | 80 | 695  | GCCTTCGGGTGCTGAGACGGACAGTACTTATGATTACGTAAACTCAATAGTTTTTAT   | 20265 | A_95_P269121 FG640413     |

|       |     |    |      |                                                              |       |                           |
|-------|-----|----|------|--------------------------------------------------------------|-------|---------------------------|
| 20823 | 245 | 83 | 997  | TAGTGTGTGAAACTTGAGTTTTACATTTGGAATGGGGACTGAAGTTGACGCATTCTG    | 20271 | A_95_P191417 TA15233_4097 |
| 20825 | 245 | 85 | 1207 | ATTTGACTGAGGAAGACAAAGCTAATTTGATTAAGAAGCTTGAGCAGCAACAGCTA/    | 20275 | A_95_P012006 TA17212_4097 |
| 20826 | 246 | 1  | 416  | CCTTTAGTATGATATTTGGTTCCTTTTAGATGAATTGATGAAACTTGGTAATAGCAC    | 20109 | A_95_P154332 DV157719     |
| 20827 | 246 | 2  | 243  | TGTTATATGAACTGAAGTCATGCATGTTCTTGCTTTAAAATCTGTAGGTCTTGGCCTT   | 20111 | A_95_P104107 CV016852     |
| 20830 | 246 | 5  | 531  | AGCTCCTTGACGGACATTCCTCTCGTTTCTGTCATGAGATCTTATCATCACCTGTGT    | 20117 | A_95_P076910 BP527115     |
| 20831 | 246 | 6  | 1451 | TACGTGTTGCTTGGTGATACCATTATTGATGTCTCCACCATTATTGTTGACTTCCGAG   | 20119 | A_95_P188772 TA14644_4097 |
| 20832 | 246 | 7  | 981  | GTCTGTTATTAGACGATGATGTTGTCACCTCTTCCAGCTAAATAAGATAAAGACTTC    | 20121 | A_95_P258396 D85912       |
| 20833 | 246 | 8  | 561  | ATGCCTTTAAGTTTTAAATTTGGAGGTTTGGTGCGGTTAATATGAGCCAAAAGCTTG/   | 20123 | A_95_P307883 FG639914     |
| 20839 | 246 | 14 | 131  | CAAGTAGTCCTTCAAATGCTTCTGTTCTAGGGTTTTGAACCTCTTTTTTGTGCTTAAA   | 20135 | A_95_P003661 TA13102_4097 |
| 20842 | 246 | 17 | 578  | GCGGTGGTGACCGGTACATGCTATTTATTTGATTTTTACTATGGTTATGGTCCATTG    | 20141 | A_95_P005561 BP530129     |
| 20846 | 246 | 21 | 651  | TGGGGATTTGTAGTTGAGTCGCGGTTGTTCTATTCCGTTATTTATGAGATTTTAC/     | 20148 | A_95_P157627 EH615679     |
| 20849 | 246 | 24 | 677  | CATCTAACCAATCGTTGACTCTTTCACCTTGACATCATTCTGCTATTTGGCTATCT/    | 20154 | A_95_P316858 FG196716     |
| 20850 | 246 | 25 | 856  | TATTCAAAGACCTGTAACTCTAGAATCTGGCATTTCCTGTCCATAAACTTCTGTTGA    | 20156 | A_95_P009961 TC41290      |
| 20852 | 246 | 27 | 409  | TTTTTATAGTGTTCATGGAGTTTGGGGTGGTTGTTGGCTGATTTAGGTGAGGTCT      | 20160 | A_95_P077965 BP527393     |
| 20860 | 246 | 35 | 637  | CCTCAAGGATGGGACAAGACTTATTGTTTGAGATACCTGAAGAATTTAATGAAATT     | 20176 | A_95_P001041 DV162559     |
| 20862 | 246 | 37 | 811  | CTGTGAAGCAAAAGGTCTTGTGATTACCTTTGTTGGCATGTTTATTTCTCTTGGACA    | 20180 | A_95_P013391 TA15497_4097 |
| 20865 | 246 | 40 | 1018 | GCTCTCCTTGGCCAGTTAACTGGTTGATTTAACGGAGTCATATAGATATGTTTCT/     | 20186 | A_95_P208667 TA19018_4097 |
| 20872 | 246 | 47 | 469  | CAGCTTTGTTCTAGTTGTCGTTCTTAAGGTCTTGATATTGTAATTTCTATTGCAGATT   | 20200 | A_95_P101103 TA12412_4097 |
| 20873 | 246 | 48 | 843  | CCTTTGTTGCAAACTGAACAATATGAAATCACAAACCGTGAAAATTTAGTTGTAGT     | 20202 | A_95_P031896 Y09506       |
| 20874 | 246 | 49 | 863  | GTGGACATTGCCAGGAAGCGTCTCCTTAAGTAACTTAAGTTGTTGTAAGTGTACAA     | 20204 | A_95_P208757 EB438033     |
| 20875 | 246 | 50 | 252  | GTTACTTGGTTTTTTAATTCATGAGCGCAAGTCTATACAAGCCCTTTTATAAAAGGGT   | 20206 | A_95_P214142 EH624317     |
| 20877 | 246 | 52 | 736  | AAGCTCCACATTGCTGGTAAATAGTGGGGAGGAGAAGGATAAAGAAATTTGGTGCT     | 20210 | A_95_P156967 EH615034     |
| 20879 | 246 | 54 | 280  | TTAAAATTTGCGATATCTGGGCAAGACAAGCCCTCTAATAACTCATCAATTGCGACAC   | 20214 | A_95_P098828 DV157864     |
| 20882 | 246 | 57 | 509  | TGGCTGATTGTCGTTTCTGATGGACTTTTTATTGCCTTTAGCTGTTTCACTGTTTCT    | 20220 | A_95_P124837 DW004632     |
| 20883 | 246 | 58 | 633  | GTAATGTGTTTCGTTGTACCATCTGGATGATTGGACCTGGGAATGAATGAATGCTT     | 20222 | A_95_P021516 DV160348     |
| 20884 | 246 | 59 | 420  | GTTCCCCACCCCAATGACAAAGAACAATAGTTAAAATTAAGCTATTTCTTCTAC/      | 20224 | A_95_P050491 BP132409     |
| 20886 | 246 | 61 | 865  | AAGGATGACTATGCAGTTGTCTTGTGGTGTCTGCTGCTTTTATGTGAACTTTTCGGT    | 20228 | A_95_P252374 FG168352     |
| 20888 | 246 | 63 | 51   | TGTTGAATGCATCATCACCAACAGTGCCTTTGAGCCGCTTCCATGATGGTAAAGTGT    | 20232 | A_95_P033839 AJ717803     |
| 20890 | 246 | 65 | 544  | ATCTTGACATTCATTATCAAGGGACAACAGCTTGAAAGGACTCTTCAGCACCAATTGC   | 20236 | A_95_P034070 AJ718098     |
| 20893 | 246 | 68 | 539  | AGATCAACGACAGCTTTGGTTCCTCCTCAAAGACCAGGTTACTCTAAAGAGGATA/     | 20242 | A_95_P049836 BP132258     |
| 20898 | 246 | 73 | 840  | CTTACGTAGATCAGCAGGGCATGTTCAATCAAAGTTCTCGTCTACTCTTTGTTTATG    | 20252 | A_95_P245152 EB679261     |
| 20900 | 246 | 75 | 746  | GTTACATCTTATGCTTGTGTTGTGCTTGTGATGGACATTTTATTTGGGTTATCTTTC    | 20256 | A_95_P161132 EH616479     |
| 20904 | 246 | 79 | 219  | GGTAGCTGAAAAGGATGTTGGCCAAAAAAGGACATTTGCTAATAGTTATGAATTA/     | 20264 | A_95_P017436 TC72449      |
| 20906 | 246 | 81 | 334  | CACGTTAATTATGTTACTCCAACACTACGTGCCTGTAATATTTTGCCCAAGCAATGGCAT | 20268 | A_95_P115282 DR752037     |

|       |     |    |      |                                                             |       |                           |
|-------|-----|----|------|-------------------------------------------------------------|-------|---------------------------|
| 20907 | 246 | 82 | 63   | ATGACGCGAGCTTCTTTTGTGCTGACTTGAATTGCATTCTGAATTGAATTCCCTTTTT  | 20270 | A_95_P002061 BP192620     |
| 20915 | 247 | 5  | 726  | GATTTTCGTAGATCCAGCTTGTGCAGCTACTGCTTTGAGTGCATTGCAAGGTTACAAA/ | 20285 | A_95_P307513 DV162343     |
| 20916 | 247 | 6  | 573  | TTTCGACTGCTTCGAAATTATCTTTCTAATCTATGATGATGAACTGAGGATTGCTTGCI | 20287 | A_95_P184407 FG634402     |
| 20919 | 247 | 9  | 690  | TTCCAAGTATTCATTGGTTACATGTCTGACTGATGACTGTGTTTTATACAAGAGG,    | 20293 | A_95_P013381 EB440030     |
| 20923 | 247 | 13 | 279  | CGGCCGTGATTGTATAGCACAGAGATTGTACATAATATGGTGTGAATAATAGAAGT    | 20301 | A_95_P141812 EB445446     |
| 20928 | 247 | 18 | 742  | GCAGAGTTCCATTTTCGTGTCAGTTACTTTCTGAGATCTGCCATTTTGTATTATTCTT  | 20311 | A_95_P183842 EB426399     |
| 20935 | 247 | 25 | 1116 | GTGATTTACTGAGTCGTGAAGGTATAGGAGTTTTTGACACAGCATTACCCTAGAAAA'  | 20325 | A_95_P200372 TA17194_4097 |
| 20936 | 247 | 26 | 1056 | GGCTCTTGCCCTTCGAAATTCCGAATTGAAGGGTTGAATGCATTAATAATTTTGACTC  | 20327 | A_95_P192147 EF051141     |
| 20939 | 247 | 29 | 864  | GGCCTTAAGTTCTTTTCTTATTGGGGTAGTCTTGTAGAAAATTTATCCGAATATGCG/  | 20333 | A_95_P193272 DV158451     |
| 20940 | 247 | 30 | 663  | TGACGAGGAGGATGAAGAATAAGCATTTCGACTAGAACGGAAAGAAAGCTGTTGGI    | 20335 | A_95_P100893 TA12891_4097 |
| 20941 | 247 | 31 | 327  | CAAGAAACAACGTAAATGCAGATCCTTCATGTCAGAATCAATGATGATCGTGTCTGTI  | 20337 | A_95_P025676 FS411044     |
| 20942 | 247 | 32 | 47   | ATTTACAGATTTTTGTATGAGAACGTTGCTGAGTTTTCTGCAACATAATGTAATCTG   | 20339 | A_95_P031676 EB437988     |
| 20947 | 247 | 37 | 2038 | CTTCGGGTAATTAGAAAGCTGTTTACCATTAATAAAAATGGATTTTTGGAAAGCGGC   | 20347 | A_95_P214632 X81855       |
| 20949 | 247 | 39 | 700  | TAGGGAATTGAAGTTCAGAAATTTACCAAACCTGAACCTGTAGTTTTCTACTTCTGTTG | 20350 | A_95_P177692 EB428593     |
| 20964 | 247 | 54 | 713  | TAAACACGTCCCTTGTGCGGGCGACGTTGTGGTTGGCTTGTGGACTTCTATTTATTTT  | 20379 | A_95_P119447 DV162665     |
| 20966 | 247 | 56 | 403  | ATCATGATGGACTCTTCTTTGATACTTACCTACCTTCGGACTATCCGCATGAGCCA    | 20383 | A_95_P084620 BP529066     |
| 20969 | 247 | 59 | 781  | GATCTTCAGATACTCAGGCAGCTCGAATCAAATTTGTTATTCCTTGGATCATCCATTI  | 20389 | A_95_P247597 DV161190     |
| 20972 | 247 | 62 | 787  | TACGCTGATGTCTGTCAAACCTGCCAGTAAGTTATTGTCTACCCACTGAGAGCACACT  | 20395 | A_95_P242757 TC50758      |
| 20973 | 247 | 63 | 1130 | TTCACGCTGGCATGTATCAAGATGAATAGGACTGATCTGGCTAAGAAGGCAGTGGA'   | 20397 | A_95_P018721 TA16633_4097 |
| 20976 | 247 | 66 | 517  | ATTGCTACATCATATAATGTGCATAGCGCCTGTTACTTTTAAACATGTGTTTCTGGTA  | 20403 | A_95_P024061 TA16142_4097 |
| 20979 | 247 | 69 | 784  | TTGTTATTCCTGTGCCATACAAGGACGCTAATACTCTAGGGATCTTTGATGCCTGTGC  | 20409 | A_95_P118147 DV161163     |
| 20980 | 247 | 70 | 727  | ACAAGAGGCAAAACGCTTGGCAACAATTTCAATCAACTAAAGGTCAGACTAAGAAGC   | 20411 | A_95_P216122 TA20636_4097 |
| 20982 | 247 | 72 | 561  | CTCTCAATATATATCCCTACCCGACCATGTATTTTCACTTTTACTTAATACGTGATA   | 20415 | A_95_P203502 EH615689     |
| 20983 | 247 | 73 | 491  | TTGAAATTCTGCGAGACTGGGAAGATAAATTTATTGAGAAGTATGCCAGGGTGGGG    | 20417 | A_95_P123592 DW003463     |
| 20984 | 247 | 74 | 45   | CTGAACGGTCATATCTATTTGTGAAAGAGAGTGGCTTTTCAGAAAAGTCATCTCTAA/  | 20419 | A_95_P134037 EB435823     |
| 20988 | 247 | 78 | 866  | GGGCTATAGTTTCTTGTCTAGGTTTCTAGTGAAAACAGTAAAAGAAGTATTCTCT.    | 20427 | A_95_P177647 X97967       |
| 20993 | 247 | 83 | 1251 | GACTCTAGGCTCTAGCTTTTTGCTATCCTTGCAGAGATTGTATTATTTACTTGTGATA  | 20437 | A_95_P179522 TA12526_4097 |
| 20995 | 247 | 85 | 729  | TAGTCCTTCGGAAGGGTTTGTGACCCGTTGAAACAGTTTGAATCTCATATTCACGT    | 20441 | A_95_P148107 EB677303     |
| 21009 | 248 | 14 | 147  | ATAGGCTTGAATGCCGATGGAAATTTCCAAGTAAAGAGTGGATGGCATAGTGGGTG    | 20304 | A_95_P146682 EB450776     |
| 21013 | 248 | 18 | 637  | TGTGTAGAGCTGGCGCTGGAGCAAAAAGAATTACCTTTGTATTTAACACAATTTTAG/  | 20312 | A_95_P157847 EH615885     |
| 21016 | 248 | 21 | 571  | TTTCTCACAGGTAACAAGGATAAGTGATATAATCTGGTAACAATGCTTTTTAGTTGG   | 20318 | A_95_P133817 FG641828     |
| 21018 | 248 | 23 | 1432 | TCCAATTGTTTGCGAATGAACATAGCTCGTGAAGTTTCAAGAGTTTTATAACAGAA    | 20322 | A_95_P022506 TA15718_4097 |
| 21021 | 248 | 26 | 595  | GGATCAGTTCAGTTTGAATTTAGGTTCTCTGATTTTCTTTTTGCTGTCTTCTTA/     | 20328 | A_95_P111182 FG640251     |
| 21023 | 248 | 28 | 492  | AGTAGAAAAAGACTATCTGAGCTCAGGTAGGAGAGCATGCGTAAAACCTCTCCCTA    | 20332 | A_95_P266321 BP533240     |

|       |     |    |      |                                                             |       |                           |
|-------|-----|----|------|-------------------------------------------------------------|-------|---------------------------|
| 21025 | 248 | 30 | 182  | AAACCATATATAACTCCATCGACAAGGTTTCAGATAGACAGGGTGCCTCCTCAA`     | 20336 | A_95_P088868 BP530255     |
| 21026 | 248 | 31 | 0    | CTCTGCATGTGTAACCTCGGTGTGATCGATATTGTGATGAGGTAATAATGTTTTAAA   | 20338 | A_95_P017741 A_95_P017741 |
| 21034 | 248 | 39 | 491  | CGAAGTAAGAAGTCAAGGTAACAAGCTTGTGGACAACAGTCAGTAAAGATCTGGTG    | 20351 | A_95_P011576 TA16364_4097 |
| 21038 | 248 | 43 | 1447 | CCTAGTTTGTACGGGACACCAGTTTGCTATTTGCTATCAATCTATCATTCTTGCTCC`  | 20359 | A_95_P018236 TA14362_4097 |
| 21040 | 248 | 45 | 795  | TGTATGAGAACTCGTTCTTGCAACCCTGGGTTCTGTTGATAGATTTGCGAGCTCAGA   | 20362 | A_95_P307238 FG137860     |
| 21041 | 248 | 46 | 595  | CGTATTGTTGCAGCATTTCATGTGTGTACTTTGGCTTGAATGGACAAAAAATCAATTT  | 20364 | A_95_P206407 TA18509_4097 |
| 21045 | 248 | 50 | 296  | GAGAATAGCACTTTTGTATTGTGTCTCTCTCGTCTCTTGCCTTACATTCAACAGCAGC  | 20372 | A_95_P046686 BP131462     |
| 21047 | 248 | 52 | 687  | TGGCATTTTGAACCATGTTTGTCTTTCTCCAGAAATTTGTGGTACTGTTAGCATATCC  | 20376 | A_95_P115917 DV158976     |
| 21048 | 248 | 53 | 354  | TTTTAAAAGGCTGGATGATTCTGGAAAAGTCCAGAGGGCTTCGTAAGGAATGCCCTA   | 20378 | A_95_P103602 CV016597     |
| 21049 | 248 | 54 | 829  | CCATAGTTTATGAAGCATTTCATGTGAATATTTGCCTGTCTATGTAACCCAGACCTTTT | 20380 | A_95_P211317 DV158454     |
| 21053 | 248 | 58 | 223  | GGGGTTATGTAGACTGATAATCTCACCTTTCTTATTCCTGAATTGCATTTGACTTGT   | 20388 | A_95_P002446 CV016592     |
| 21055 | 248 | 60 | 734  | GGCAGTGGATTCCGAGGGCAAGCATTTCAGATGGTGGGTTGATTATGAAAAAGAT     | 20392 | A_95_P306328 FG167098     |
| 21056 | 248 | 61 | 985  | GAATAAAGTTAATGTGTGAATTGTGTGATTGTGATCTATGGGATCGCGACTATAATC   | 20394 | A_95_P179847 M15173       |
| 21063 | 248 | 68 | 1030 | TCATAGAATGGCCATGGCTTTCTCTCTTGCTGCTTGTGCTGATGTTCCAGTACCATT   | 20408 | A_95_P196522 TA16357_4097 |
| 21065 | 248 | 70 | 896  | CTATAGTTTTCTCTAGTATATTATTCGAAGCCGTCATCTTCTTGTGCCATTTGCAAC   | 20412 | A_95_P289123 DV157776     |
| 21066 | 248 | 71 | 709  | GTTGTATGTGGCCTTGTGAGCTTTGAGTTTGGACGTATAGTTGTCTTTAGCAACCTT   | 20414 | A_95_P195559 EB438896     |
| 21069 | 248 | 74 | 1027 | TGGATGCTCCAGTGAACCTCTTATTTTCGTGGAAATGAATCTTGTTTTTACGGAG     | 20420 | A_95_P007671 AB119466     |
| 21078 | 248 | 83 | 886  | CTAACTTTGCAATAAAACAAGATAGTAAAATGTGCATTTAACGAGTTGATCGATCCATC | 20438 | A_95_P289738 DV160762     |
| 21081 | 249 | 1  | 421  | GAGATATTAAGACTTTGTACCTCTGTTGGATGTCACTGCTGGTAATGCTGTCTGTTA   | 20443 | A_95_P023066 DW002423     |
| 21082 | 249 | 2  | 299  | GTGATGACATTCAAAGGGGATAACTGGAGCCAAGTTGTGATATGGCTTATTTTTACG   | 20445 | A_95_P100713 BP535494     |
| 21084 | 249 | 4  | 510  | CCACCAGAGTCTAGGGGAATGTCCAAGCTAAAATGGATCGAGGAAAGGAAGAATA     | 20449 | A_95_P156292 EH613641     |
| 21086 | 249 | 6  | 469  | AACCCAAATGACACAGAGGAGTCAATATGGTGCTTCTCTGTGAAGCTCAACTGTAT    | 20453 | A_95_P071285 BP525667     |
| 21088 | 249 | 8  | 594  | CAATCCCTTAATAGTTGGGTCAATGCCAAATATGCATCATTCTATCTATTTCTTCT    | 20457 | A_95_P058921 BP134599     |
| 21089 | 249 | 9  | 344  | GCTGGGTGTACCATTTAGGTGTGTATATGATCATGGTTCAAAAATTTGTTTCAAGGTT  | 20459 | A_95_P027766 EB443765     |
| 21091 | 249 | 11 | 836  | TAAGTGGAACCTCTGCTGTATTGCTGTATTCTGCAATAATATTGTGGATTGTGGCATA  | 20463 | A_95_P228989 DV161013     |
| 21092 | 249 | 12 | 863  | TGTGCAAGCTGTCCCGATTTGTTTGGGAATCAGCTTAAATGAAAGTGCGATATTGT    | 20465 | A_95_P008146 DW000274     |
| 21093 | 249 | 13 | 723  | CGTACTGGTGGTTGAAGAACAATAGTCGAATATGCCCATCCAAATGAAGTCAAGTT    | 20467 | A_95_P179612 TA12549_4097 |
| 21095 | 249 | 15 | 435  | TAGTTTCATGTGGTTGGAAGATAATGAAATCGGGGAAGTCCGTTTGGAACTT        | 20471 | A_95_P135962 DV159900     |
| 21096 | 249 | 16 | 802  | GAATGACATATACTGTGTTTTCTTGGGAAGTTTGAACAACCTTATGTGCCTTAAACAAG | 20473 | A_95_P026201 EB441754     |
| 21098 | 249 | 18 | 595  | GTCGATTTACCTGTTTCTTCCCTTGCACTATCAAACATTAGGCATTTAACCATTTGCTT | 20477 | A_95_P090618 BP531027     |
| 21100 | 249 | 20 | 785  | TTTCAAAGATGCCTTTGCAAGAGCCCCAAGCCCCTGAACAATAAAGTGTCTCTTCT    | 20481 | A_95_P194632 EH622289     |
| 21102 | 249 | 22 | 265  | CTGTTGCTTATAGGGGTGTTGGTGGAGCTCCTTTGTGTAATATATATGTCATCTTTCG  | 20485 | A_95_P129872 EB429804     |
| 21104 | 249 | 24 | 519  | GTTAGACTAGTTTTGTTTTAATTTCTCTGTAAGCTGCTGCATTTATAGCAGTTGGCA   | 20489 | A_95_P121447 DW001515     |
| 21105 | 249 | 25 | 610  | CTCCAATCAACAAAGTGTAGAATAGCATTAAATGTTGTCCTCTCCAGAAAAAAGAG    | 20491 | A_95_P194017 EB677535     |

|       |     |    |      |                                                             |       |                           |
|-------|-----|----|------|-------------------------------------------------------------|-------|---------------------------|
| 21112 | 249 | 32 | 0    | TCAATGGCAACAACATGAACATCATAATTCTCAGCCATGAAAAATCACCTCCCCCTA`  | 20505 | A_95_P316738 A_95_P316738 |
| 21115 | 249 | 35 | 451  | TGTAATACATATACTGTGTACATGGCTTCTTGGGTTGAAAGATATTGACTTGTGTTGT  | 20511 | A_95_P021911 FG644966     |
| 21119 | 249 | 39 | 851  | CGAAAATCTTCCGTTCTTCGTCGATGTCTTTTAAAATTAAGTCTAGCCTATGAAACAT  | 20519 | A_95_P222582 TA22064_4097 |
| 21121 | 249 | 41 | 482  | GCTGATTTTTCGCGTCTCACAACAATGTTGTAATTGATTACTTGATAAGACAATGCAG  | 20523 | A_95_P220572 TA21636_4097 |
| 21123 | 249 | 43 | 283  | TTTGTAGCTGATGACATTTTCAGACCCATATGAGTCTCGTACAATGCTTCTTTTCTCCG | 20527 | A_95_P108442 CV018832     |
| 21127 | 249 | 47 | 687  | GTCTCTTAGGAGTTTGATTGATAACTCAGTAGTGGAAGTTTTGGTGCCGGAGGAAA    | 20535 | A_95_P238509 AB055500     |
| 21130 | 249 | 50 | 761  | CTTGGGGTCTGCGCTTGGTGTACTGATGAATGGTACCATCTTAAGTCAAATTATCATA  | 20541 | A_95_P015296 EH622808     |
| 21148 | 249 | 68 | 799  | GGGTTTGTGATGGTGAAGTTTGTCCAAAAGTTAATTTGGTTATTATGGGTTCTTAGC   | 20576 | A_95_P016576 DV160405     |
| 21149 | 249 | 69 | 259  | TTGTTCTGACATCCATGATGTGGGGAAGTGTAACTATGTAAGTGGGTGCAATGGA     | 20578 | A_95_P133302 EB434706     |
| 21152 | 249 | 72 | 779  | ATATAGAGAACATGGGGTTCATGAAAGTGTACCAGTGAGAGCGTTGGCTCCTTTGTAC  | 20584 | A_95_P150887 EB681018     |
| 21155 | 249 | 75 | 883  | TCCTTATGCTGTACATCAGATGAAGGCGTAAGTCAAGATGGCGATGCTGGAGATGA    | 20590 | A_95_P204767 TA18135_4097 |
| 21157 | 249 | 77 | 993  | TGGGCTTGTATGGTTTGGATGTAAATTATTTTTGAGAAATAGATCTTGCCAGCCAG    | 20594 | A_95_P180772 TA12823_4097 |
| 21158 | 249 | 78 | 1038 | GCTACATTTTGCGCCATTCTAGGTAATGTAGTAATATACTCCATTCTTTGAGACGATT  | 20596 | A_95_P130137 TA16773_4097 |
| 21161 | 249 | 81 | 106  | ATTGGCTCAATCTTAGAATAGTGGTTGGTTTACGTGATCACAAATACCTCATTCTCT   | 20602 | A_95_P092133 BP531658     |
| 21164 | 249 | 84 | 178  | CAATTGTGGTCACAGTACCTATTGTAACTGTATAACCTATTTATAGACTACTTGCC    | 20608 | A_95_P090668 BP531051     |
| 21171 | 250 | 6  | 194  | AGTGATGTGGTTGCTGGTATGACTGGTACAAAGTAAGGATAAGATACTTGTGAGGT    | 20454 | A_95_P109052 TA13487_4097 |
| 21173 | 250 | 8  | 679  | GGTACACAAAATATGATCATCAGATTTTGGATGCAAGTCTAGGTTGAGTTGAATGCA   | 20458 | A_95_P123617 DW003483     |
| 21174 | 250 | 9  | 478  | TGTTTAGGGTTATGGTGAATGTGGTTTGTGATGGTGTGTTAGTTGTTTTTGTGAAA    | 20460 | A_95_P268851 DW003245     |
| 21180 | 250 | 15 | 402  | GACTATTTATCCAGATCATTCTAGTGAATCTCGTCGTCGTCATATGCAGCAATAA     | 20472 | A_95_P055091 BP133606     |
| 21181 | 250 | 16 | 651  | CAAGTGCAACTTGGTAGATTACTGTATGTCCTAGTAATCCACTGTATCATTGTATGC   | 20474 | A_95_P121432 DW001499     |
| 21182 | 250 | 17 | 479  | GTCTCCTTGCCTACAAATTATTCTTGAATGATTAGTATTTTGTGTTTCCGGGGGAG    | 20476 | A_95_P162322 EH621265     |
| 21183 | 250 | 18 | 1365 | CCACCAGCTGCACCGAAGATTTTGCACAGCATGTTGATAAAATCATACTGTTCCAATT  | 20478 | A_95_P238689 AY061648     |
| 21185 | 250 | 20 | 469  | CAAGGGTGATACTATGGATGATATATACAGTTTACCTGTGTGATATGCCATAGAATA`  | 20482 | A_95_P019906 EB683600     |
| 21187 | 250 | 22 | 2971 | ACATGTCAAAGTACTTCGTTTCTTAACCTCTCACTGTTTATGTTAGTCAATTGTTGCT  | 20486 | A_95_P222742 AJ133502     |
| 21194 | 250 | 29 | 662  | GGTATTACCAGTTCTAGGGAGTTGTATTATGATTTGATATTCAATGGCTATTTGCC`   | 20500 | A_95_P100683 TA20739_4097 |
| 21198 | 250 | 33 | 370  | GTAATACTTATTCTTGTAAGCATTGATTGTTTCGAGAGGAATGGTCATTGCTCAGGA   | 20508 | A_95_P233289 TA18497_4097 |
| 21199 | 250 | 34 | 688  | TAAAATGAGTGAGTTTTGGAGATGGTGAATCGGCTCGTGAGGCAACTGAAGCAA      | 20510 | A_95_P144732 EB448246     |
| 21201 | 250 | 36 | 1122 | GCAACATCTTTGAAATTGACAGCATTGGCATGTTGTGCATGCGTTTACTTTCCTTTCC  | 20514 | A_95_P018226 TA15108_4097 |
| 21203 | 250 | 38 | 502  | TAGCTCAACAAAAACATGAAGTTCTGAGGTACCGCCACCACACTCCAAATAAGTTTAC  | 20518 | A_95_P262166 BP134733     |
| 21205 | 250 | 40 | 328  | GATTTGCACGACCATTTGTTGATAACTATGATTTTTGGTTAAGAAGGCCTGAACCCA   | 20522 | A_95_P110542 CV019776     |
| 21209 | 250 | 44 | 450  | TTATACAAAGCACCAGATAGCTTCTGAGCTACTAAATGGTGGGCTAAAGTTGGTCGC   | 20530 | A_95_P160217 TA13884_4097 |
| 21210 | 250 | 45 | 690  | AATTTTCTCATAAAGCGTGGATTTACTTATCGGAGTTTGTGATGACAGAGCCCCAC    | 20532 | A_95_P151472 EB681675     |
| 21212 | 250 | 47 | 377  | CATTGAAGTACAAGCATTGTTGATTGAGTTCTCAAGGATTAGAGAGGCCGCGGGGCT   | 20536 | A_95_P100658 BP535472     |
| 21214 | 250 | 49 | 991  | GCATGCTTGGCACCTGTGCTTCTAGTAATTTTCTTTTCTTCTGTAACTGCTTACTA    | 20540 | A_95_P012561 TA15251_4097 |

|       |     |    |      |                                                             |       |              |              |
|-------|-----|----|------|-------------------------------------------------------------|-------|--------------|--------------|
| 21216 | 250 | 51 | 243  | GCAGTTGGAACATGTATTGGAGAAAAA                                 | 20544 | A_95_P102432 | FG644264     |
| 21217 | 250 | 52 | 630  | CAAATCCTCCTCATTGAGGCCTTTCCTTTTAAAGAGGTCAATCAACATATCCACTGTAT | 20545 | A_95_P305768 | FG195555     |
| 21220 | 250 | 55 | 995  | TTCTTGGCTGGAAGACGTCTACTTTAAATAA                             | 20551 | A_95_P182372 | TA13199_4097 |
| 21221 | 250 | 56 | 575  | AATCATGAGCTTGAGGGCTCATCTATGTAATGTTTCCAGATAA                 | 20553 | A_95_P113367 | TA13071_4097 |
| 21223 | 250 | 58 | 1040 | TACGAGAACGACTTCCAAGTAGTTC                                   | 20557 | A_95_P215957 | TA20600_4097 |
| 21224 | 250 | 59 | 698  | AGACTGATCCTCGACTTCCCAGGACATACCGCAATAAGGTTGCTACTGCAAATTTTGT  | 20559 | A_95_P152302 | EB682646     |
| 21226 | 250 | 61 | 656  | ACCTTGATCGGGGCGGATCCAAGATTTAAACTTTATGGGTTTGCAGTGTCAAAAAC    | 20563 | A_95_P123082 | DW002998     |
| 21227 | 250 | 62 | 827  | ATTTTTGTCTTGATGGGTAAGTAGCTCCTGAATGTTTATATTCATTTTTGAGCTGCTCC | 20565 | A_95_P245627 | EB439032     |
| 21232 | 250 | 67 | 398  | GAAATTGCAAGCAAAAAGGCAAAGGTAAGAAAGCGAGTCTTGGGCGATGTAGCTC     | 20575 | A_95_P098298 | BP534407     |
| 21237 | 250 | 72 | 680  | CTATTCTGGACTCACTCAGTTTTGCTCGATTTAGTGCTGTAATTGCTGAATTTTGTCA  | 20585 | A_95_P284123 | FG635995     |
| 21242 | 250 | 77 | 518  | GCAGACAAGTTTTCGATTGCTTTCATATACGTGTGGTTAGTAGAGCACATCTCAACTA  | 20595 | A_95_P201907 | EH623306     |
| 21243 | 250 | 78 | 2124 | GCTGAAGTACAATCAACACTTCTCCATTGTAACATTCTTAAAAACATGCGGATGAAAAA | 20597 | A_95_P236429 | AY123847     |
| 21247 | 250 | 82 | 1061 | GAGAGACTTCTTCTTTGTGACTGAAAATGTTGTCACTCTGTACCTTCATTTGTAATTG  | 20605 | A_95_P212867 | TA19927_4097 |
| 21249 | 250 | 84 | 401  | TGAAGTGAGCGCTTAAAAACTTGCACATTTTCAGGTTTCTATCTCCCATATATTTTCGC | 20609 | A_95_P027651 | TA21922_4097 |
| 21250 | 250 | 85 | 1513 | GCATTTCCAGCGTGGAAGATTTTTACACGATGATTCCAGCTTTGTTGTATCATTTTAG  | 20611 | A_95_P008636 | TA14928_4097 |
| 21256 | 251 | 6  | 598  | GCAAAAAGAAGTAGCAGCAAGTTAATGGAGCAGCTTTGTACAACGGGTTGTCCATC    | 20622 | A_95_P285513 | FG643114     |
| 21258 | 251 | 8  | 566  | TCTGCTTCAGATAGCATTGGATGGAGGATTCAAAAGACCTGTAATATGTTCCATTTG   | 20626 | A_95_P210017 | TA19311_4097 |
| 21259 | 251 | 9  | 819  | CTCTGCATAAGTGAACCTGATATGCTGTTCCGAGATCGGTTGATCTGGTGATTGCTCC  | 20628 | A_95_P146487 | EB450550     |
| 21262 | 251 | 12 | 298  | TTGGTGTTGGGGTTTTCTGTTCTACAGTTGAATATCATGGACTATTAGCAATGCAATAT | 20634 | A_95_P214397 | TA20255_4097 |
| 21266 | 251 | 16 | 417  | TTCCACTGCAGCTGTTCTTGATTAGTAGTGAACAATATCACAGCAATCATACAAAAG   | 20641 | A_95_P040641 | BP129883     |
| 21267 | 251 | 17 | 417  | ATGACCTCAGGCTATCAACAGATGAGAATCTTATCAAGCGGATCAAGGATGGATTAG   | 20643 | A_95_P103877 | CV016728     |
| 21269 | 251 | 19 | 220  | CTACACAAAATGAAATAAGAATCTCTTCGCTCTCTCTCTCTCAATGTTCCGACCG     | 20647 | A_95_P072875 | BP526072     |
| 21270 | 251 | 20 | 493  | AGGAAACCTAGTGCCCTGTATTCATATTCTTATTATCCCCTTATTGTGAGTTGTTAT   | 20649 | A_95_P097303 | FS408454     |
| 21274 | 251 | 24 | 985  | CCATATCCGACGCTTTGCTTTTATCATAATTGCTTACATCTTGATAGATTGTTCTAGTA | 20657 | A_95_P204417 | TA18061_4097 |
| 21275 | 251 | 25 | 597  | TTTCCGGTACGGTCTGTTGTGTTTAGCTTCGTCGGCCTGATTTTCTTTGTAAACCCACA | 20659 | A_95_P064905 | BP136186     |
| 21276 | 251 | 26 | 320  | GGACCTGATAATCGGAAAACACTAGTTTATGACTTGTGTTTGTAGGACCAATGAATGTT | 20661 | A_95_P001306 | FG137063     |
| 21277 | 251 | 27 | 141  | AGTGGCACATCATCATCCGCTTGTGGAAGTTCAGCAAGTTAGAACTGCAAAATGGC    | 20663 | A_95_P156077 | EG650397     |
| 21278 | 251 | 28 | 1567 | TCAGACATCTTTTTCCCTCCCTTGTGTGATACTCCTTATGTGTAATATAAATTC      | 20665 | A_95_P210807 | DQ129870     |
| 21284 | 251 | 34 | 608  | TTGTGATATTATGGAGTGATTATCAGA                                 | 20677 | A_95_P208702 | EB447309     |
| 21286 | 251 | 36 | 548  | AGCTCTTGAAACATTTAAACGTGTAGTCGTTGCTGAAACCGAACTAGGGATGCCTT    | 20681 | A_95_P033834 | AJ704986     |
| 21289 | 251 | 39 | 782  | CATTTCCAATTTTTGAAAAGATTGGATTTTTCTTGAGGGGCTGCCTATAGATAGGC    | 20687 | A_95_P209427 | TA19188_4097 |
| 21294 | 251 | 44 | 821  | TGTACAATTTGGATGGAACCTCATGTTGCCGAGCGGATTAATTCGCCAAATAAGTAGT  | 20697 | A_95_P126917 | EB426304     |
| 21302 | 251 | 52 | 694  | TCTATTCGTGCCTCACGACATGCCCTTTTTGGCCTTAGTTGAGCATGTATTCTCATTT  | 20713 | A_95_P261306 | DW003630     |
| 21303 | 251 | 53 | 588  | TGAGGAAGTGAGGGAAGGATAAGTGCTTATCCTTCAGTTTTGTAATAAAGTTTACTG   | 20715 | A_95_P208107 | EB443661     |



|       |     |    |      |                                                             |       |              |              |
|-------|-----|----|------|-------------------------------------------------------------|-------|--------------|--------------|
| 21305 | 251 | 55 | 753  | ATCAATCCCCTGAACTCGATCAGAAATCCCGTTGTCAGTGGACCCTTCTTTTGAAGG   | 17966 | A_95_P000116 | FG157904     |
| 21310 | 251 | 60 | 643  | ATCGGATGACACTTGAGAGTGAGCATGTCTCTGCTCATTTACATGAATGGGTTGATC/  | 20727 | A_95_P042926 | BP130481     |
| 21312 | 251 | 62 | 888  | ATTGGGCAAAGGTAGAACATATTGTTTGAATTGTAGCGAACCACTGGATTTTGAG     | 20731 | A_95_P118612 | DV161692     |
| 21315 | 251 | 65 | 351  | AACAACCTGGGATGATATGGACGAAAATCTGGCACCACAACATTTTACTGTGAGCTCG  | 20737 | A_95_P053246 | BP133124     |
| 21319 | 251 | 69 | 776  | CGGTGGCATTATGTTTCCCATTAACATTATGTTGGTAGTTGAATGTTTCTGTTGAGT   | 20745 | A_95_P246767 | DV999273     |
| 21320 | 251 | 70 | 637  | TGTCAAAGGATCGCTTCTCGAGTGTATGAGTATCACTCAGAAGGACCACAGTTGAT,   | 20747 | A_95_P055486 | BP133714     |
| 21322 | 251 | 72 | 337  | CATTTAGTTCCTTATGATAAACTTATTTACTCTGGCAATAAAGGCTGTCTTCCAGCA   | 20751 | A_95_P076915 | BP527116     |
| 21323 | 251 | 73 | 1010 | CTGCTGCAGAATGATTGCCATTGTGCCTAATTTCTTAATCTTTAATGTGAATGTGT    | 20753 | A_95_P250742 | AF154645     |
| 21328 | 251 | 78 | 72   | GTCAATTGTGCAGTTTGGTCCTACGCTGGGTAGATCATATATATTATTTTATCC      | 20763 | A_95_P257174 | EH622168     |
| 21329 | 251 | 79 | 216  | AAGAAAGACCTGATGGGTTTCTAGGTGAGGCTGGACTGGATGAAGGTTATGATGAT    | 20765 | A_95_P143722 | EB446938     |
| 21334 | 251 | 84 | 434  | ATAGTGAGTACCAATGTGAGCTGTTGATTCTGGAGTTGGAAGCCTCAATGCACCA     | 20775 | A_95_P085000 | BP529167     |
| 21338 | 252 | 3  | 602  | ATGCCACTCTATCGTGCTGTATATGATATACCAAGTTCTTTGATGCTGGTTCTTTTAT  | 20617 | A_95_P056281 | BP133914     |
| 21353 | 252 | 18 | 808  | TGTGTTTCATGACGAATACCTTATCCAGCCGTGCCATACTCTTCTCCATAAGGTTTT   | 20646 | A_95_P234134 | DV999274     |
| 21354 | 252 | 19 | 774  | TAGGAGCAATATATGCAGGTCACATTCAGAGAAGAAAAATAGGGACCAATGATGT.    | 20648 | A_95_P022671 | EB683173     |
| 21359 | 252 | 24 | 559  | GTTTCTGTTTCATGTTGCATATGGAGCAGGACTAACCATAACAATTTGTGCACAATGTA | 20658 | A_95_P316058 | EB427619     |
| 21360 | 252 | 25 | 387  | TTCCGAAAACCATTTCCAGACATAAACACTTGAATGTCAATTTCTCAATATATCTCTC  | 20660 | A_95_P013001 | TA14187_4097 |
| 21366 | 252 | 31 | 657  | CACCGCTGGTGTGCAACAATGTTTCAGTGTTCATCTAATGGTTAGTTCACGTTACTG   | 20672 | A_95_P014401 | DV161017     |
| 21367 | 252 | 32 | 868  | GATGATCACATTCGGCATCATGCCAAGCCCTAATCTTTGATTTGGTTAAGCTTCTG    | 20674 | A_95_P185832 | DV157903     |
| 21369 | 252 | 34 | 717  | CAGCAAGTGGGAAATGACTTGTGTTTCTTTGGAGTATTGACTTTTTCTTTTGAATG    | 20678 | A_95_P201067 | DW004423     |
| 21371 | 252 | 36 | 518  | TTTGCATTGGCTTTACTTCAGCCTTTACTCTTTTGGGGAACATTTAATTCATACTGG/  | 20682 | A_95_P159582 | EB439146     |
| 21379 | 252 | 44 | 837  | TTCCTATTGTGCAGATGATGGAGCATATCCGCCAACAGATGATATCATGGTCTGACG/  | 20698 | A_95_P118212 | DV161232     |
| 21382 | 252 | 47 | 116  | CTGGTGGCCTATACCTGTATTCTCTCGAGCCTTCAAATGATCAGATTTCAATTC      | 20704 | A_95_P132087 | EB432513     |
| 21383 | 252 | 48 | 620  | TGGGCGGTGGTGACCGCGTACATGCTATTTATTTGATTTTACTATGGTTATTGTTTA   | 20706 | A_95_P181302 | EB683516     |
| 21384 | 252 | 49 | 412  | TACCAAGATAAGTGCTGCGACGTGTTATCCATTGTAATATTTAAAGGTGCACATATT   | 20708 | A_95_P090043 | BP530777     |
| 21385 | 252 | 50 | 642  | GCTGAACTTTCAAACATTCGGCTGATTTTGCATGTAATCAATTCGATGTTGATGAGTA  | 20710 | A_95_P149652 | EB679561     |
| 21387 | 252 | 52 | 785  | GGGGGCTGATGCTTGATCCTTTTGTATGTTGTTTACTTTAATTTTGGTGTACTGCTC   | 20714 | A_95_P269461 | EB424813     |
| 21388 | 252 | 53 | 1110 | ATTCCTCAAATTCCTGAACAGCAACAGGAATATTGATGCTAAAATTTGCCCGCTTTTC  | 20716 | A_95_P207002 | TA18646_4097 |
| 21396 | 252 | 61 | 92   | AACAATACTTGTGGGTGAGCTACCACATTGCTGGATGTGCTCATTTGTAATGTGAAA/  | 20730 | A_95_P108577 | CV018906     |
| 21399 | 252 | 64 | 691  | AGTGCTATACTTTCAGAATACGAGTTCTATATCCTGTAAGATGACATTCTGGGTTTG   | 20736 | A_95_P162887 | EH621882     |
| 21401 | 252 | 66 | 854  | GATCCACGATTTATGAATGGACATCATATTGATGGGTTAGTTCCTAACAGTGGCAA/   | 20740 | A_95_P296733 | EB679155     |
| 21402 | 252 | 67 | 768  | GCATGGGATGTAGCATTACTAATAAGAGTTCCTGAATACAATGGAATAAGGGAGTTT   | 20742 | A_95_P176682 | TA11720_4097 |
| 21404 | 252 | 69 | 524  | ACCAACCAATTAGGCTTCTGAGGGATCAGGGGGTCTTAATTTCTGACCACATGAAT    | 20746 | A_95_P214362 | TA20248_4097 |
| 21405 | 252 | 70 | 415  | GGGTGCGGTGCGTTGTCATCTTTGTTTGGGTGTTGTAGCAGAGATTATTTGAATG/    | 20748 | A_95_P274348 | AM790664     |
| 21406 | 252 | 71 | 680  | ACAGGGTCAATTAATAGGATTTGAGGAACCGAGGTAGCATTAGGCCATTTGTTTAT    | 20750 | A_95_P234364 | EB679945     |

|       |     |    |      |                                                              |       |                           |
|-------|-----|----|------|--------------------------------------------------------------|-------|---------------------------|
| 21407 | 252 | 72 | 321  | CTTGATTGATACATAGATTGAAATCTCTATTTGTGGTATAGGGGTGGGGGCACTTTCI   | 20752 | A_95_P088333 BP530019     |
| 21413 | 252 | 78 | 912  | GGTGCTTCGAGTGAAAACGAATATTCTATCCGGAAATAAATACTGTATGTTTCTTGTC   | 20764 | A_95_P010771 X51426       |
| 21417 | 252 | 82 | 600  | CCAATTACTACTGCTCAGGTGAGGAGCTAAGGAACTATTGGTGCATCTGCTTACATC    | 20772 | A_95_P183467 U64923       |
| 21420 | 252 | 85 | 606  | GATTCCTGATGTCGAAGACTGGAGATGATAGAGTAGATCCTACTTGTGGTGGATGA/    | 20778 | A_95_P061050 BP135164     |
| 21428 | 253 | 8  | 239  | ACAATTGCTCAGTCTATTTGATCGAATTGATAGATACGAAACCCCTCCCATCTTTGG/   | 20792 | A_95_P223087 TA22174_4097 |
| 21431 | 253 | 11 | 840  | CACGCTTGTTTCAGGATCCTGAAACTGGATATGGACTGATAAATTATCAAGGCTTTTT   | 20798 | A_95_P242752 EB449817     |
| 21432 | 253 | 12 | 81   | CAACCCACCTTATGATGAGACATTTAATTGAACCTACTACTGTTTATCTTATCATGGAT  | 20800 | A_95_P112857 CV020883     |
| 21436 | 253 | 16 | 154  | GTTAGGTGGTATCTTTCTTATTACGGCTATAGTCAAGAAAAGTCTGTAAAGTGATTGT   | 20808 | A_95_P213132 TA19983_4097 |
| 21438 | 253 | 18 | 806  | GTAAAAATGGGTTCTGACAGTTAGGTTGAAGAATTATTCAACAGACCCGGAACAACC    | 20812 | A_95_P128157 EB427700     |
| 21440 | 253 | 20 | 879  | AGATGCCAAGACGTTGCATATCCCTGTGCTGGAGTTCTTGTAAATAATTGTTGGTTGC   | 20816 | A_95_P022731 EB428177     |
| 21441 | 253 | 21 | 161  | CAACCTCAAGCTTCCTTATGTAGGATTGAGCATTGTATCATTCAATTAATTGTCAACCC  | 20818 | A_95_P116767 DV159584     |
| 21444 | 253 | 24 | 339  | AACATTTCCATGCAAGGGAGGCCAGGAGGTGCCAAAGTTTGAACAAAATGATGATTT/   | 20824 | A_95_P134002 EB435763     |
| 21446 | 253 | 26 | 318  | AAACTGAGTGCAAAGCTTATATTTGGTGCTGACAGCCCTGCCAATTCAAGAGAACAG    | 20828 | A_95_P114522 FG157348     |
| 21449 | 253 | 29 | 361  | TCCTTTCAAAGCGGATCTAGAATTTTAGTTCTATGGGTTCAACATTTAAAGTTATGG    | 20834 | A_95_P221117 EH623811     |
| 21454 | 253 | 34 | 672  | CGTGCCTGAATAAAATGTCATCCATTTCTAACAAGGTTTCATGTGTTGATTACACTTGT  | 20844 | A_95_P134882 EB437768     |
| 21457 | 253 | 37 | 555  | CTTTGGTGACCTGAAAGATGACCTGATAGTGCAAATGTCAAATGTATACAAAGTAA     | 20850 | A_95_P215342 DW003929     |
| 21465 | 253 | 45 | 802  | CCAGGTAGATGAAAGTAAGTAGATGATGAGGGAAAGGAGTTCAACATTTTGTATTG     | 20864 | A_95_P220037 EB679789     |
| 21471 | 253 | 51 | 1010 | CCGCACCAGTAAGATTAACCTTCAACTGGTAATGCAAACCTCATGAATTTTGTCTAAA   | 20875 | A_95_P248427 AB286177     |
| 21478 | 253 | 58 | 0    | GTGCATTTCCATTATCAGCATTCTGTGCTGTTGTTTTCAGATTAATGCTAAATCTTC    | 20889 | A_95_P251919 A_95_P251919 |
| 21480 | 253 | 60 | 457  | GTAATATTGGTAATTCTACCCCTCAATTTTGGATGCCGGAGAAAAGACAGGAAGCA     | 20893 | A_95_P282458 AM827545     |
| 21483 | 253 | 63 | 1167 | GGGTTGCTCCTATGCCCCCTATTACCTAATCTTTATAGTCTGATACTAATAAAACAATA  | 20898 | A_95_P016676 X81853       |
| 21490 | 253 | 70 | 987  | CTCCCAATATATATTGTCCTTTTTGCACTGAGAAGTGTCCAAAATCATTAAATGTATCGA | 20912 | A_95_P196002 TA16244_4097 |
| 21495 | 253 | 75 | 805  | CCAGCCAAACTAGCTGCATCTTAGCCTCATCTAGTTCATCTTTGAAGAGTATGGTTCC/  | 20922 | A_95_P235994 DV157850     |
| 21497 | 253 | 77 | 707  | TGTCATCCTCAATATCATCATCTTTATCAAATCGATGAGCCTGGAATTGATTTTGACGI  | 20926 | A_95_P269046 FG187755     |
| 21500 | 253 | 80 | 126  | CCATTTGAATACACGTCGTGATCTATTGTAATCGAAAAGCTTTGGCTGAATGATTTGG   | 20932 | A_95_P033864 AJ717852     |
| 21503 | 253 | 83 | 861  | CCAGAGGATAAAAAGATCTATGCCGCTGGAGGACGAACAAAAGTACCCATATACGTG    | 20937 | A_95_P222317 EB681947     |
| 21505 | 253 | 85 | 648  | TCTGCAAGATGGTTAAACAAGTATCTAAGGGTATGTGCTAATGTTCAATCAAATGGC    | 20941 | A_95_P121457 DW001525     |
| 21509 | 254 | 4  | 225  | ATGATATGAGATTGATGTACAGGTGGAACATTACTGATCGTACTAGGAAAATTCACT    | 20785 | A_95_P132337 EB432811     |
| 21514 | 254 | 9  | 799  | GCTTTGGCATTGTAATTTTCGCTTCATGATCTCTTGTATGTTTTCATCCAATGTTTCAG/ | 20795 | A_95_P016081 TA17875_4097 |
| 21515 | 254 | 10 | 839  | TCATGTGAAGGTACTATTAATAACTATAATCGTGTGATGGAGCAGCTCGACCTCCAT    | 20797 | A_95_P248787 EB426734     |
| 21517 | 254 | 12 | 647  | GAAGATGGGGTTGTTAAAATCTTGAATTTAGAGGAAGGTGGGGCTTTTAAATGTTAGC   | 20801 | A_95_P115792 DV999531     |
| 21518 | 254 | 13 | 670  | GGAGAAGTCAAGTGATGAGGAGTTAAGTGAAGCGGAATATGATTCAGCTGACGATC     | 20803 | A_95_P248437 EB439929     |
| 21521 | 254 | 16 | 467  | TGTTTAGTGTATATAGCTCTTACTCGGCTGTTTACGGCCGCTCTTTGTTAGTACAAC/   | 20809 | A_95_P260686 AM807444     |
| 21522 | 254 | 17 | 716  | AGAACGGAAGACTATGCCATGTTCTCCATGTTTGGATTCTTCGATTCAGGCTATCGTC   | 20811 | A_95_P105297 TA11627_4097 |

|       |     |    |      |                                                             |       |                           |
|-------|-----|----|------|-------------------------------------------------------------|-------|---------------------------|
| 21525 | 254 | 20 | 219  | GATGAACCATGGTGTATCCTCTCATTTGACACAGATCATAAAGAAATATCGAACTTTT  | 20817 | A_95_P096973 BP533841     |
| 21527 | 254 | 22 | 480  | ATGGGTTTAAGTATTTTACTGAGCTCCTACATTGTTAGATTACAGTACAGTACCTTG   | 20821 | A_95_P122672 DW002651     |
| 21541 | 254 | 36 | 997  | GTGTAGATGACTGATGATATAATAGAGAGCATGTATCCAAAGCTGCAAAACAATATC   | 20849 | A_95_P020211 TA15644_4097 |
| 21546 | 254 | 41 | 658  | TTGTCTCGGTACTTCAATCTTGTTAATCTATTTACGGTAAAGGGCCAAATATACCCTTC | 20857 | A_95_P180757 TA12820_4097 |
| 21547 | 254 | 42 | 431  | ATAAATGGGACGGGGTTTTGTAACCCATGACCCATGTAATTTAATGAATATGACCTT   | 20859 | A_95_P022926 EH623004     |
| 21556 | 254 | 51 | 508  | TGCGGAAGAACTTATTAATAAAGTGTGTTTGGCCTGTAAACAATTTTGCCCCATAACA  | 20876 | A_95_P159277 EH617309     |
| 21558 | 254 | 53 | 814  | GGAGTGTACCTGATGCGCATTGTTTTAACAATTTAAGAATTTTGCTTTGCTTTGC     | 20880 | A_95_P115777 TA12687_4097 |
| 21563 | 254 | 58 | 108  | ATATTCGATCGCATAGAGGTACGAATGGGTTGATTAACAATTCACAGATGAAAAAA    | 20890 | A_95_P131387 EB431578     |
| 21564 | 254 | 59 | 1187 | CCCGCCAAATTGACTCAAATCTTTGCAATATTCTCAACTATGTTTTGGAATAAATGTC  | 20892 | A_95_P020046 TA17922_4097 |
| 21571 | 254 | 66 | 576  | AGACGAGTTAGAGAGGTCTTTAGGCATTTTGATCGCCACGCTTTGGATTTATTAGAC/  | 20905 | A_95_P086520 FG153827     |
| 21576 | 254 | 71 | 514  | GAAAACTCTGTCAGACTGTCACCTTATGTTTTGACCACTTATACGGTGGCTAATTCTC  | 20915 | A_95_P205467 TA18295_4097 |
| 21577 | 254 | 72 | 750  | TCTAGCATGTCCAGCGATGAAAAATCAAGAAGGGGCAAAATATCTGCCCGTGCTCTA   | 20917 | A_95_P199427 TA16991_4097 |
| 21579 | 254 | 74 | 147  | GCAACCGCTTACTTTGTAGCTTGAGTTGCTTTGACTCTTCAACATTATTACCTCAATT  | 20921 | A_95_P141087 EB444876     |
| 21587 | 254 | 82 | 715  | ATGCAACAACCTGATCCTCTAAGCTTGCATGGAAGCTGCCCTGTTATTGAAGGTGAGA. | 20936 | A_95_P128262 AB471927     |
| 21588 | 254 | 83 | 451  | AATTTGATGTAATTGCTTCACTGAAGAGTTTTATGTATTTTCTACTTGAATCAGCGGC  | 20938 | A_95_P257524 TC68991      |
| 21594 | 255 | 4  | 889  | AACTTCCCTATATATCTTTGGGCTAGCAAAGAGGTTGAGAAGGAGGTTCTGCCGAT/   | 20949 | A_95_P184007 TA13589_4097 |
| 21597 | 255 | 7  | 762  | TCAGTTCTACCCAGTAGAGGTATCAGGTGCACTATTATTGGTTAGCCGATTTGCCTCA  | 20955 | A_95_P141612 EB445287     |
| 21598 | 255 | 8  | 864  | CAGTTGACTTCTCCCTCTATATACTAGGAAGTAACCACATGGATTGCTCATCAATGG/  | 20957 | A_95_P206177 TA18452_4097 |
| 21601 | 255 | 11 | 852  | TGAAGCACGGATCAAAGAGAATCTTGATGTAAGTGAAGTGGTCTATACCTGATGATTT  | 20963 | A_95_P226634 DW000438     |
| 21606 | 255 | 16 | 193  | ATACAGTAACTGCTTTTGTGGTTTTACTTGCTGCAATATCAATGAATCATCTTTTCTGG | 20973 | A_95_P143937 EB447132     |
| 21612 | 255 | 22 | 286  | AGGGGCAGCTGTGAGCACGTGATTTTTGCCCTATATATGAATAATTCAAAACTCA/    | 20985 | A_95_P109472 CV019327     |
| 21614 | 255 | 24 | 780  | ATTGGGTCTGACCTTGTAGTGGCTGATTATTGGGGATTCTTAATTGCTGTTATTAAGA  | 20989 | A_95_P125117 DW004932     |
| 21615 | 255 | 25 | 486  | AGCTAAGAAACGTTGAAGGATTTGATTTGCCCAAAAAATTTGGGTGCTGCTTGACA    | 20991 | A_95_P250532 EB438743     |
| 21616 | 255 | 26 | 694  | TTGCACAGTTAAAGGATTTCTGTGGATGTAATCAATTTAATCATTGCTAGCATG/     | 20993 | A_95_P179267 TA12464_4097 |
| 21617 | 255 | 27 | 769  | CCTGACCACTCCTAAACTGTTAACTAGCTTTGGAGGTCTTTACCTCTTAAAGTTTT,   | 20995 | A_95_P116212 TA13007_4097 |
| 21619 | 255 | 29 | 762  | CCAAATAATAAAGGGTAACAAGTTTGGAGCGATGGGAGTAGGATTGGGTTTGGG      | 20999 | A_95_P292568 EB427708     |
| 21622 | 255 | 32 | 241  | GCTAGCCTGCTACTATTAAGCATGTTTGATCTATTGACTCTTATGGTGTTTTTATG    | 21005 | A_95_P143112 EB446457     |
| 21632 | 255 | 42 | 452  | GGTGTAGCAATGAGGTCCTGAATGTGGAGAAAAGATGGATATTTCTCTAATTATA     | 21025 | A_95_P069495 BP137401     |
| 21633 | 255 | 43 | 162  | CGTCTTCTCTCTCTCTCTGTATTACTTCTCCATATATTTAGGGGATGTTAGGTCTG/   | 21027 | A_95_P175112 TA15543_4097 |
| 21639 | 255 | 49 | 532  | GTAGGTCAATAGGGAAGTACATTAGTAAGTTTGTATTTGGTTGAAGCTTATGTCGAT/  | 21038 | A_95_P297673 FG639066     |
| 21640 | 255 | 50 | 1109 | ATGTGTCCGTTTATGGGTATCGAAAGTTGTGGGAACACAAGCTCCAGTTCAATTGG    | 21040 | A_95_P015166 TA14363_4097 |
| 21641 | 255 | 51 | 341  | AACTCAGTCTTTCTTTTAGAAGTCAAGTTTTAGTGTGACAATGTGATGTTTGGCAGG   | 21042 | A_95_P055866 BP133813     |
| 21656 | 255 | 66 | 1760 | CTGGCTTGCTTATGGTTATGTTTATTAGTTAATGTGGTTCATTTGTTTTCGTAGTGAC  | 21071 | A_95_P182082 TA13128_4097 |
| 21660 | 255 | 70 | 229  | AGTGCAGATCTTTGATGAAGTAAGAATGGAAATTTTTGGAAGTGTCTTGAAATGCA    | 21078 | A_95_P030416 EB446468     |

|       |     |    |      |                                                              |       |                           |
|-------|-----|----|------|--------------------------------------------------------------|-------|---------------------------|
| 21664 | 255 | 74 | 739  | AGGAGGCATGGTTCTTACAGCAGGACTTCTATTTACCAGTCAAAGGAAAAGCCATAG    | 21086 | A_95_P195927 TA16224_4097 |
| 21665 | 255 | 75 | 790  | AGTGTTTTTCTGCTGTTCTGCTCTTTTCGATAAAAATGATGGGTACCATGGAGGTCATAA | 21088 | A_95_P254854 EH616823     |
| 21666 | 255 | 76 | 810  | CTTTCCTAACTGGAAGAGGATTGTAATGTCTGTTTTCTGGCATTAAATAATTTTTCC    | 21090 | A_95_P206097 EB448302     |
| 21667 | 255 | 77 | 267  | GTTATAGCTGGTTATGGACCTGTTACACGAGTGGACGATGGTTCAATGACATGGTT     | 21092 | A_95_P113057 CV020985     |
| 21669 | 255 | 79 | 1092 | CAGTACGGCATTGTGAAGTTACAATACTGGAATACATTAATATTTGATGGGAAATA     | 21096 | A_95_P190557 TA15041_4097 |
| 21671 | 255 | 81 | 382  | GGGGGTAGTGATTGTAGATTTGTTCTTTAGTTTCTGATGTGGATTAGGGTTGGTTAG    | 21100 | A_95_P201792 TA17498_4097 |
| 21678 | 256 | 3  | 107  | GCTTGAAGTATGGATCAACAAGAAGATAAAAAGAGGATGGAGGAGTCATTTGGGAG     | 20948 | A_95_P091273 BP531284     |
| 21681 | 256 | 6  | 733  | CTTCTAATTGATGAATTGTGGCTGGATGTTTAGATTTGAAATTGGTAAGCGCTTGTAT   | 20954 | A_95_P221727 TA21881_4097 |
| 21685 | 256 | 10 | 868  | ATTACCAAGAATTGCCATGTCCATCAAGCTGCATTGAATGCTCAACCAGCATTAGT     | 20962 | A_95_P249047 DV161159     |
| 21689 | 256 | 14 | 317  | TGGAGTTGCAGCGTTACATTTGAGCTCAATTGAGAGCAGTTAATAGTAATCCTTGT     | 20970 | A_95_P089638 BP530582     |
| 21690 | 256 | 15 | 315  | AGGGGTGTTTCATCGATTGGTCTAGTACAGTTTTGAAAGATTTTGGTTGTGATTTTCA   | 20972 | A_95_P098838 BP534665     |
| 21697 | 256 | 22 | 915  | TATTACTGTCTCTGCATGGTTTTGACATTTTAAAGGAACAGACGTAAGTTCTAGCT     | 20986 | A_95_P015466 TA14626_4097 |
| 21700 | 256 | 25 | 242  | TGAAGGGCGGAAGTCTAATAAAGGTAAGTCTCTGGGGTTATGCATGGGAAGCATAAG    | 20992 | A_95_P208792 TA19047_4097 |
| 21701 | 256 | 26 | 458  | TGTGAAATTGACCTAATTGCTCGTGAAGTCCAGCAATAGTAAAGTGACCTTTAACA     | 20994 | A_95_P285968 FG644264     |
| 21703 | 256 | 28 | 153  | TAAGTTTTGGTTGAAGTACCCGTTATGGTTTACTGTGGTTCTGCTACTGCCTCGTT     | 20998 | A_95_P154602 EG649665     |
| 21711 | 256 | 36 | 447  | TGCTGAATTTCTTAGCTATGGACCTCAAAGGAAGAGAGTGTACTGGAAAACCTTT      | 21014 | A_95_P264196 BP526620     |
| 21712 | 256 | 37 | 440  | TCCTAATATGATATTTGTATGACAGGAAGCTGATTTGGGCTGTACACGAACTTATCA    | 21016 | A_95_P113657 CV021242     |
| 21718 | 256 | 43 | 853  | TGGAAATATGTGCTAGATTTGCTGATGTATCATCGCTGATAATGGGGAGTAGCTGAC    | 21028 | A_95_P237074 FG157342     |
| 21719 | 256 | 44 | 875  | CCTCTAGCATACTGTTACGTGAATCACTCCAATAATCATTTGTAAGTAACTGAAC      | 21030 | A_95_P230144 DV158504     |
| 21722 | 256 | 47 | 738  | AGAAAAGGCTTATATACTTGATGAGAGCATTGGCAACTTGAGCTTCCAGATAACTCG    | 21035 | A_95_P236069 EB450465     |
| 21723 | 256 | 48 | 313  | TTATGTTCCCATGGTTGACAAGGCAGTTGATTCTGTGTTGGAAGAAACAAACATCC     | 21037 | A_95_P070030 FG643216     |
| 21724 | 256 | 49 | 330  | ACCCTATAGGCATGGTCTCTAAGTATGATGTGGAATCAGAAACATTGAACCAATCCAAT  | 21039 | A_95_P041601 BP130133     |
| 21731 | 256 | 56 | 873  | CTGTTATCCTGCATCATAGGGTTCTAAGATTAGATTTTACCAAATCTTTATGTTGTCG   | 21052 | A_95_P024316 EB679979     |
| 21734 | 256 | 59 | 703  | TCCTTAAAAATTGTTTGTTCACCCAGTTTCAGTTAGATTCTGTGTTCTCTCAAGGATGA  | 21058 | A_95_P015031 TA12059_4097 |
| 21738 | 256 | 63 | 683  | TCGGAAAAGGGGAGGAGAAAACACTTTTGTGTGATCACAAATGATTATTAGATATCA    | 21066 | A_95_P116127 TA13214_4097 |
| 21739 | 256 | 64 | 285  | CGTCAATCGTTGCATTTGTTTAAATGATTATTGATTGTTGTCAAGTGAAGTCAAGC     | 21068 | A_95_P070370 BP192615     |
| 21741 | 256 | 66 | 595  | ATTCACCTACAAGCCACACCAGTAGTGTGTTGGGAGGAAATGATTCTGGGACTAATT    | 21072 | A_95_P129162 FG164011     |
| 21745 | 256 | 70 | 833  | TTTCATTGTCGTATTCTGATCGGATTTGAGACCGTCTTTATACTGAGTTTTGTTGGAT   | 21079 | A_95_P244618 DV162568     |
| 21748 | 256 | 73 | 442  | ATTACATGTCTTGTCTGGTCAGATATCCAGTGCCATTTGTTTTTTCAGAGGTCCTAATG  | 21085 | A_95_P004911 EH665273     |
| 21751 | 256 | 76 | 267  | GACGGTTTCTGTTGATGGATATCATGCATTTAGCTATTCTGAGAAAAGTATGATAAA    | 21091 | A_95_P135557 EB439050     |
| 21756 | 256 | 81 | 781  | AACATGTGTTGATGATTCCAGCTCACTGTTATAATTATCAATTCCTCTCTCTCCCTC    | 21101 | A_95_P013596 TA12260_4097 |
| 21759 | 256 | 84 | 792  | GCATAATCTTGGGGAAGTTGATTCTGCGATACCTGAAGTTCAGTTTAGGGTTTGATC    | 21107 | A_95_P116012 DV158506     |
| 21761 | 257 | 1  | 518  | GGTTTTCTTACCATCGATTCTATTTCCGTTTCGCGGTTTCGCACATTTTTTGAGTTCA   | 21110 | A_95_P240623 AM786200     |
| 21764 | 257 | 4  | 793  | CCCACATCTAGACAGTGTTATATGATAGCCAAATACACCTTACAAGTCATATAATAA    | 21116 | A_95_P125017 DW004809     |

|       |     |    |      |                                                             |       |                           |
|-------|-----|----|------|-------------------------------------------------------------|-------|---------------------------|
| 21766 | 257 | 6  | 666  | TAATGCTGGTCAAGCCGCTTTGATCAAGCTCTAGCATTAAAGCAAAGTGTGCAGTTC   | 21120 | A_95_P063410 BP135774     |
| 21767 | 257 | 7  | 464  | AGTTATAGAAACCGAAAGAGAGAGTCCTTCAGATTACAGCGTGAACGCAGAAAGGC    | 21122 | A_95_P103432 TA13935_4097 |
| 21769 | 257 | 9  | 817  | AATGTTTCTGATGGCCTTTAATGTAAATTTCTTGCCTCATGCCATACCCTCTGTAGTT  | 21126 | A_95_P003446 TA14616_4097 |
| 21770 | 257 | 10 | 901  | TTCCGCGAGACAGTAGCCATGCATCCCTTACGGCTATATCTCCTTATGTTATGATGC/  | 21128 | A_95_P118717 DV161781     |
| 21772 | 257 | 12 | 821  | CATTGAGATATCTGAGGAATGTCGCCACTTAATGTCAGGGATTTTTGTCGCAAATCCT  | 21132 | A_95_P149397 EB679234     |
| 21775 | 257 | 15 | 422  | GTATGAAAGGAAGCTGATTTGGGCTGTAAACACGAACTTATCAATATATATCTCCTCTT | 1861  | A_95_P000051 FG625247     |
| 21785 | 257 | 25 | 638  | TCGGCGTGCCTAACAAATATGTATAGCCTTTTTGATGACTTGTTAATGGTCATTACTTT | 21156 | A_95_P215747 EB678865     |
| 21789 | 257 | 29 | 599  | GAACCTTTGGAAGGTCCTATAATGTGTGTCTTATCTGAAGCTGCGAATCCTGTTCTCT  | 21164 | A_95_P038016 BP129158     |
| 21790 | 257 | 30 | 466  | CTGTAGAACCATAAAGATAAATTAGCATGAACCGCATCCAGTATAAATTCTGGATTCTC | 21166 | A_95_P030736 EB437660     |
| 21792 | 257 | 32 | 334  | TATCTGCCTTACAATCACTGCTTCCAAGGATGGAAGACTTGAAGATCTCATCAGCGT   | 21169 | A_95_P084955 BP529156     |
| 21800 | 257 | 40 | 195  | GGCGTCCATGTCTATACTGGCTAAATGATTTTACCTTCACTTAATATGTAAAGTAGTA/ | 21185 | A_95_P108082 CV018662     |
| 21803 | 257 | 43 | 1104 | GAACAATTTACAAGATTGTAGTGCATGTATCCAAATTCAACAAAGCACTTTTCCCCC   | 21191 | A_95_P011701 TA13554_4097 |
| 21804 | 257 | 44 | 832  | TATAATCACTGGTAGTGACCCTAAGAACACACCTTGGTCATATCATAACGGGGTTCTT  | 21193 | A_95_P164947 DV161952     |
| 21811 | 257 | 51 | 1037 | GTTATCAGATGTAGCTCCGAAGAAACTTCTTGCTAGAAAATGAATGATTGGTTTGA/   | 21207 | A_95_P191552 TA15262_4097 |
| 21813 | 257 | 53 | 358  | TCTGGGCTTCTCTTTTTCATGGACCGCCTTTAATGAAGTACTGGGTTACGATTGTTAA/ | 21211 | A_95_P112212 CV020575     |
| 21815 | 257 | 55 | 504  | CCTAGCACAGATTTTCAGTAAAATAGAGGTTGCGTATCAGGAGGCTGTCTGGAAGA/   | 21215 | A_95_P065855 BP136441     |
| 21816 | 257 | 56 | 856  | TCTCCTGGTTGCATCACTTGTGAAGATAAGTTCTTGGTTAAATCTTGTGTTACCGA/   | 21217 | A_95_P189262 AJ966358     |
| 21818 | 257 | 58 | 111  | GAATTACACTAGGCTTGTATTGTTGTTGTTGTTGTTGTTACTAATTGCCAACAAAAGT  | 21221 | A_95_P043466 BP130622     |
| 21819 | 257 | 59 | 979  | CTCAGATGTCTAAATGGCTCCAGTCTGAAATATTGATTTATTAATAATGTGCAGCAAT  | 21223 | A_95_P189887 TA14884_4097 |
| 21820 | 257 | 60 | 894  | GCCACATAATGCACCAATAAGCTCATTCTCTTATGCTCTGGCCAGTATGCTCTCTTATC | 21224 | A_95_P244177 EB439523     |
| 21826 | 257 | 66 | 569  | TAGGGCCGTTGAGGGTTTTCTTCTTTGTTGTTTTAATATAAATTCTTGTCTTGACC    | 21236 | A_95_P130632 TA18908_4097 |
| 21831 | 257 | 71 | 1235 | ATGCTATAGGTGGTTCAGGTGCTTCTTGTGTATAAATAGCAAAATTGCATTCACGA/   | 21245 | A_95_P022041 TA18579_4097 |
| 21833 | 257 | 73 | 557  | ATCGGAATCCGGCGGAGGTAAGGAGAGTATCTTAAATGGCTGGAGATTTCT         | 21249 | A_95_P023986 FG150164     |
| 21834 | 257 | 74 | 396  | TTTCCCCTTGTTATATCTTGTATGTTTCAGTCGGTGAAATAGGGACCTTTGATGTATA  | 21251 | A_95_P307018 FG637133     |
| 21838 | 257 | 78 | 731  | AGTATTCAAAGAGTTCGTCTCATTTAGTGGACGCGGGTCACATTGAGGATGAGAAGT   | 21259 | A_95_P138822 EB442559     |
| 21841 | 257 | 81 | 708  | AGGGACAGTAGTGGTGAGGATAATCATGATAAATGGTATATCATTAGCTGGTCGTCTC  | 21265 | A_95_P146227 EB450216     |
| 21844 | 257 | 84 | 762  | GTTGCTATAGTTTGAATAATGAGGAGCATCTTGTGGTTCGAATGCTGATACAATTG    | 21271 | A_95_P191217 TA15182_4097 |
| 21847 | 258 | 2  | 1609 | AGTAGCCTTGCCTGCACATCGTTCCTGTGTACAGCATCCGTTTCTTTTATTCATGTGT  | 21113 | A_95_P200497 TA17220_4097 |
| 21855 | 258 | 10 | 774  | ATCCAACAACCTGGGAAATCAAAAGGGTATGCTTTGTTTCTGTATAAAACGGTTGAGG  | 21129 | A_95_P294438 EB441195     |
| 21857 | 258 | 12 | 868  | CCCCACCGGCTGGATCATCTGCTGGAAAATTGAAGGTTTCTTTGGTTTGTGTTGTT    | 21133 | A_95_P193887 EB425031     |
| 21861 | 258 | 16 | 710  | GCTGCCTAGTTGCTAGATCAATTCATGTCAGTTTCTAGAACCTTTACTGTAGTTAATA  | 21139 | A_95_P142032 EB445607     |
| 21865 | 258 | 20 | 318  | AGGCTATATATAGAGGTAAGTCTTATGTGCTAGAAAAAATGGGGATGAGATCTTCA    | 21147 | A_95_P024587 TA19326_4097 |
| 21866 | 258 | 21 | 179  | CTGACAAGGCTTAAGACAATTTGCTTCTTGCATTTTATCTTGTATTCTGTCCTGTTCA/ | 21149 | A_95_P142902 EB446296     |
| 21868 | 258 | 23 | 401  | CGTATTTCAATGTCTTCATTACATTGGTTGTAAGTCGCTTGGATTCTAATGTTCACTTC | 21153 | A_95_P201582 TA17456_4097 |

|       |     |    |      |                                                             |       |                           |
|-------|-----|----|------|-------------------------------------------------------------|-------|---------------------------|
| 21869 | 258 | 24 | 885  | GAGTTTTTGTGTTGACCTTGAATATCCTACTTATAGTGACTTGTTAATGTCTGAGCTCA | 21155 | A_95_P186107 TA14055_4097 |
| 21879 | 258 | 34 | 1198 | GACAGTTAGAACATGAATGCAGAGATAGTTGTTTTGGCAACAAAGTTTGTGACTA     | 21174 | A_95_P206512 TA18534_4097 |
| 21881 | 258 | 36 | 776  | TTTATTTGGCTATTCCGGCTTGTTCAGTTTAGGGACGTGCTTTATATCATATATCCA   | 21178 | A_95_P138272 FG169948     |
| 21882 | 258 | 37 | 746  | TGATCTTACTGATTATCTCATGAAGATTCTCACTGAGAGAGGTTATATGTTTACCACA  | 21180 | A_95_P138662 FG147028     |
| 21884 | 258 | 39 | 701  | CTCAGAGTATATGTGTAGAACAAGCACAGCTGCAAATTGTTACTAATTTTATGGT     | 21184 | A_95_P202697 DW000495     |
| 21887 | 258 | 42 | 330  | ATGCCGCACGTGGTACCTTCATACAAGTTTTAGTCTTTTTTGTATCTTAAATGGTTTCT | 21190 | A_95_P089143 BP530366     |
| 21891 | 258 | 46 | 660  | CAAATCTATTGATTTTGATTGCTGTTGTTCCAGATCATCCCTTATAATATTGTTGCCG  | 21198 | A_95_P164272 EH623414     |
| 21893 | 258 | 48 | 518  | TATATAAGAGGAGGAGTGGACCCGAATCAGCCCATCGGGGTTATTTCTCTGAATCA    | 21202 | A_95_P307458 FG638464     |
| 21894 | 258 | 49 | 1730 | ATGGATGGAAGCTGAACTATACATTGCAATTGGGACTTATACCCTCCCTGTGTTGCC   | 21204 | A_95_P008786 TA11833_4097 |
| 21895 | 258 | 50 | 849  | AACTGCTGATGACGCAAGAGAATATGGACATACTCATCTGTCTGAGATCATCAATTC   | 21206 | A_95_P120292 DW000074     |
| 21899 | 258 | 54 | 552  | AGAGGCAGATCCAGAATGTACACTTTGATGAGTTCAATCTTAAATTTTTGCGTTGA    | 21214 | A_95_P286283 FG641422     |
| 21903 | 258 | 58 | 1278 | CGTTAAGCAAAGGTTGATTTCACTACCTATGGTTTGCAATGGTGTTTTTAACAATGTT  | 21222 | A_95_P008886 TA12158_4097 |
| 21907 | 258 | 62 | 7    | CCAAACAAATGTAGTGGTTTCGGTCAATTTGTTGTAACCTTCTGATAGTATGTTATA   | 21229 | A_95_P288873 BP534554     |
| 21910 | 258 | 65 | 463  | ATTTCTTCTTAGCTTCTGATGTTGATGGGAATGTGCCCTTCTTCTGGGGTACTGATTC  | 21235 | A_95_P147047 TA13199_4097 |
| 21912 | 258 | 67 | 754  | TAAACAAGTACTTCGTTCCGTCCATATTAACCAAATCCATTGGCTTAGGTATCTTCTT  | 21239 | A_95_P015566 TA18776_4097 |
| 21913 | 258 | 68 | 430  | GAGCAGCCATGAAGAGAGATGTCAGGATGAAATACTTTCTGTAAACTACTTTTTTG    | 14301 | A_95_P000096 EH619820     |
| 21915 | 258 | 70 | 526  | GTCTGTAGTAACCTTGCTTGGTTCAAATTCAAAGTGAATCGGTTTCAAGGCAAAATT   | 21244 | A_95_P127977 EB427561     |
| 21916 | 258 | 71 | 663  | GCATTGAATATGTCTGATGCTGTGATCTGGTGTGATATGTCTGTAACCCTGATTTGG   | 21246 | A_95_P164992 EH624455     |
| 21917 | 258 | 72 | 844  | GATGGGAGAGTCTTCTCCTGATGAGATGAGTTTGTACTCCAAGTATGAAAAGGAGG    | 21248 | A_95_P128927 EB428697     |
| 21918 | 258 | 73 | 737  | GAAAATGAATGTATGATACATTGATACTTCCATTGTCTTGCTAGACATTGTCATTGCA  | 21250 | A_95_P283758 FG636470     |
| 21920 | 258 | 75 | 196  | GCCGTTCAAGTGTATGGTATAATTTATTGGCTCTTTTGGTTTGGCATTGTGGTTAAT   | 21254 | A_95_P111277 CV020132     |
| 21922 | 258 | 77 | 876  | AATCTATAATAGCTGACGGTGTAAGCATCATGTATCCTATCTTGTGAGTTGTGACAGT  | 21258 | A_95_P232644 DW000398     |
| 21938 | 259 | 8  | 790  | CTCTAGACGTTTAAATCGGATGTCAGTGAGATTTACTGCATGTTTGATCTGAGATATT  | 21289 | A_95_P017156 EB437962     |
| 21942 | 259 | 12 | 443  | GCTGATTTGGGCCGTAACACGAACTTATCAGTATATATCTCCTCTATATAATTATGTG  | 21297 | A_95_P114077 CV021432     |
| 21947 | 259 | 17 | 493  | CAAATGTATATAGGATGTAATTGAACTGTTTATATGTTTTCTTCGGCCTTTTGGCGAG  | 21307 | A_95_P028266 BP134638     |
| 21950 | 259 | 20 | 480  | TATGGTTCAAGCAGGTACAATGTATTTAATTTGCCTGGACAGATGGAACAATATTTG   | 21313 | A_95_P207607 TA18777_4097 |
| 21954 | 259 | 24 | 753  | ATCAATCCCCTGAACTCGATCAGAAATCCCCTGTGTCAGTGGACCTTCTTTTGAAGG   | 17966 | A_95_P000116 FG157904     |
| 21955 | 259 | 25 | 493  | CTTCATGGTGAATGTGCTGCAACTTTCGATGTTGTAATATCAAGTATAGTTGAATGT   | 21322 | A_95_P140697 FG633777     |
| 21957 | 259 | 27 | 566  | TGAGGGCACATTTTGAACGTGTGGTTAATCAAAGATGCTGAAACTATAACATGTT     | 21326 | A_95_P040041 BP129717     |
| 21959 | 259 | 29 | 518  | GTTCACTTTCTAGTCAGCGTAAGCAGTAGGATTCTCTCGACGTTTATCTGTTAACGT   | 21330 | A_95_P089173 BP530375     |
| 21960 | 259 | 30 | 1172 | CACCAATCCCATCCCATATGTTGTAAGGCATTTTAATTACCTTTTCTTCATCATTTGAC | 21332 | A_95_P000631 AY695055     |
| 21961 | 259 | 31 | 826  | AGTAAAGGAGACCATCCATTAGTCCATGGACTACTCGCAACTCTATCCCCTAGA      | 21334 | A_95_P246197 EB452191     |
| 21963 | 259 | 33 | 535  | GCTAAGTGATAACAGGATGTATAGATTTTCGACACCTGCTGGGTTTGGTACTCTCCCT  | 21338 | A_95_P035703 BP128542     |
| 21964 | 259 | 34 | 505  | TCTCGCTTCTGTGGGTAGTTAATTTTATGACAAGCCGTTGTTTTCTTTCATTGTTGA   | 21340 | A_95_P021046 TA14086_4097 |

|       |     |    |      |                                                               |       |                           |
|-------|-----|----|------|---------------------------------------------------------------|-------|---------------------------|
| 21965 | 259 | 35 | 767  | TAGCAGTATTAGTGCTTCTGCTTAAATGTGAGACAGCAGCATATGTTGGAATATTATC    | 21342 | A_95_P225172 EB447150     |
| 21968 | 259 | 38 | 433  | GACCTCAACAATGTCAGGGATGTATCCTATCGAGAGGTATTGGGACACTTCAAATCC     | 21348 | A_95_P087983 BP529932     |
| 21977 | 259 | 47 | 573  | TGACTTGAAGCCTGAGAACATTCTTCTCAACTCCTCAGAATATGTAAAGGTTCTGAC     | 21365 | A_95_P137427 FG152454     |
| 21978 | 259 | 48 | 714  | TGGTCTTGGTGGGTCCATCTTTGCACTTTTGGTACCTCTACTTGAGTAGATTGGTCAC/   | 21367 | A_95_P146522 EB450582     |
| 21981 | 259 | 51 | 850  | AAATTCATGTAATATTTTGCACCTTGGCTGACATATGCCAGCGACTTTGCCTTCAAAT    | 21373 | A_95_P258776 TA12268_4097 |
| 21983 | 259 | 53 | 253  | TGCACTGCCAGTGTAAACCCTTGCACTTGTATCTAAGTGCACAAATTAATCTTAATAA/   | 21377 | A_95_P114217 CV021496     |
| 21984 | 259 | 54 | 218  | AACAGTTCCACGCTTCAGGATGAGGTGAACTTTGTAAATTGTTGTAGTATTATATGT/    | 21379 | A_95_P068825 BP137224     |
| 21989 | 259 | 59 | 303  | AGCTGATGATCTCCGGATAAACCTTTGGAACGGGACAAATAAGCTAACCGAAGGTTT     | 21389 | A_95_P040266 BP129782     |
| 21991 | 259 | 61 | 728  | GAAGTCCATTTGTATCCAGTTTTCTACATCAGACCCAATGTGCTCCGACCTTCTCTGA    | 21393 | A_95_P296398 EB451916     |
| 21994 | 259 | 64 | 885  | GAAGTTGGTGCAGCCGGAGGCTGTTGACCGTTCAAGTAAGTTTTTCAAATTTCAAGT/    | 21399 | A_95_P116597 DV159351     |
| 21995 | 259 | 65 | 504  | CACATTAGAGTGTAAATACAACGGAGAGTCAAGATAGCTCTATTCAATTTAAGGAAG/    | 21401 | A_95_P084165 BP528947     |
| 21996 | 259 | 66 | 1356 | GATTGGTGGGGCGATGTAAAAGTAATCAACTGGTTGTTGTAAAGTGTAAATGTAATTT    | 21403 | A_95_P210397 TA19388_4097 |
| 21997 | 259 | 67 | 213  | CGATTTTAAGAGTATTACCTGGGCTCCAGAGAATAAAGGTTAGGCCAATTGATTTT/     | 21405 | A_95_P098283 BP534400     |
| 21999 | 259 | 69 | 531  | CTGCGCTAACAGAGCGCATAGTTATTGTTGGTGTAGAGATGATTCAAACCTATTGT/     | 21409 | A_95_P231999 BP128651     |
| 22000 | 259 | 70 | 559  | AAAGAGGGCGATTGAGCTCTGCTGATTTTGTATACTTATCTAGGTATATTGATTGTT     | 21411 | A_95_P153537 EB683786     |
| 22007 | 259 | 77 | 1345 | GTTTTAAGTTTTATTTGTTTCTGTTAAAAAGTGTGTGATGGAAAGGGATGTGTCC       | 21425 | A_95_P202342 TA17613_4097 |
| 22008 | 259 | 78 | 856  | TTTTGCTCCATTTGTTTCTGGTTATGGAATGGGTCTTAATTTGAACCAGGGTTAAGC     | 21427 | A_95_P243607 DV161884     |
| 22010 | 259 | 80 | 352  | GAAGAAACAGGTCTGGGAGAATATTATTGGTTTGTTCGCGGAACAAATTTAATGGA/     | 21431 | A_95_P081930 BP528387     |
| 22011 | 259 | 81 | 1845 | AGGGGAGGGGTAATGAATAGGAGCTTAATCTGTTTCATGGATGATTTGTTTTCTTCT     | 21433 | A_95_P005151 X61146       |
| 22012 | 259 | 82 | 640  | CATTTCGACTTCTAGTTTTAATTCTATGAAAAGACCAGACTTCTTACGACTGTTTGGAA/  | 21435 | A_95_P042466 BP130367     |
| 22018 | 260 | 3  | 141  | AAGTGAAGCTTATTACACCAGAGGGCAGCTGTTGAGTTTGATTGTCCAGGCATGCAT     | 21280 | A_95_P103717 CV016659     |
| 22021 | 260 | 6  | 712  | GGGTGAGTTTTGAGTGTTTGAATGTGTACCTTTTCTTCTTTCATCATCCATAAGTCT/    | 21286 | A_95_P149492 EB679361     |
| 22024 | 260 | 9  | 431  | TGTTGCTTACTATATTCTTGCCACTTCAAGTAATGGATATGATCCTAAGTACTTAGGTT   | 21292 | A_95_P107572 DV999315     |
| 22025 | 260 | 10 | 899  | TGATCCTAATGGCATGGGGGATTTACTTGGAGTACTTCAACTGTTTTCTTGGTTACC/    | 21294 | A_95_P205322 EB679843     |
| 22026 | 260 | 11 | 780  | GATTGCAATTGGACAGGCACCTGAGCAAGAACTTGAATCTTTCAACAACCTGTTCCAA/   | 21296 | A_95_P225272 EB444939     |
| 22029 | 260 | 14 | 668  | TCCCCGTATACAAACAAGTCTTTTGTCTTCTTGTGCATGTGTCAATTTATCTATGAGAAT/ | 21302 | A_95_P159117 EH617071     |
| 22033 | 260 | 18 | 1060 | GTTGAGCTGCCTACGTTCTTTGCAAAAATAATGAACTGCATACCAATTTTTCTAGTAAAT  | 21310 | A_95_P016516 TA15214_4097 |
| 22034 | 260 | 19 | 738  | GGCATTTTTCGCTGCCTTGTCTTTATTTTCTGTGCTTCTGATTATTAGTTTATGTCCAG   | 21312 | A_95_P159327 EH617408     |
| 22042 | 260 | 27 | 832  | CATCTTGTATAATCTGTATCACATAAAATTAACCCCCAGTTTTCATGCTGCTCGTTA`    | 21327 | A_95_P135602 EB439109     |
| 22043 | 260 | 28 | 393  | AGACAAAAGTTGTGGCTTCCGGTGCAAAAAGAAAGCGCAGGGAAAAACAGAAATGCTC    | 21329 | A_95_P071720 BP525776     |
| 22044 | 260 | 29 | 784  | GCATATCTGCTGTACAGTTGCTGCAATACTATTTTGTCTGAATTTGGACAAAGTG/      | 21331 | A_95_P011686 EB426714     |
| 22045 | 260 | 30 | 0    | GCGATAACAATTTTCATTTGCCTTGTATGGATGTGCAGTGTGCAACTGGTTTTTTCAC`   | 21333 | A_95_P011766 A_95_P011766 |
| 22048 | 260 | 33 | 123  | CAGGCATCTGTGTGTTCTGTTTATCTATGGATCATCTTTTGGCATTTTAATAAAGTC     | 21339 | A_95_P140892 EB444693     |
| 22054 | 260 | 39 | 198  | GGTCTGTTCCACTTTGATTACTATTACTTGCCATACTTTAGCCGATTAATGAATGCA     | 21350 | A_95_P141942 EB445545     |

|       |     |    |      |                                                             |       |                           |
|-------|-----|----|------|-------------------------------------------------------------|-------|---------------------------|
| 22055 | 260 | 40 | 81   | AGCGGTTTTTCGGTATGTTAATTATAATGTGGCTTTTTGGTCATTTTCGTCTGACATGC | 21352 | A_95_P286313 CV018987     |
| 22057 | 260 | 42 | 685  | TTTGGGATCAAAGGGGGTTCTGATTACATTGGTAGGGGTCCTCATGTTGATGAATAA   | 21356 | A_95_P157882 EH615909     |
| 22058 | 260 | 43 | 1153 | CAGGGCAGGACAGCTAGGATTTGCCTTACTGCTGGGCAAATAATTTTTGTAATTAG    | 21358 | A_95_P021896 TA16466_4097 |
| 22062 | 260 | 47 | 388  | TAGCAGAAGCTCGTGGCAAGAAGGCAAGTCAACAGACGAGATGATCAATGGAAGT/    | 21366 | A_95_P142007 EB445591     |
| 22063 | 260 | 48 | 479  | AAGCTGCCCTCTATAGCTGTATCATAGTGTTTTAGAGATCACTAATAGGTTAATGACA  | 21368 | A_95_P198807 BP530158     |
| 22065 | 260 | 50 | 407  | ACAATACTATCCAAGTGTGGCAGATGGCTGAGAGCATCTACCATGATGACGATGACA   | 21372 | A_95_P034234 EB684021     |
| 22066 | 260 | 51 | 288  | TTACAGTGATGCAAGATGATGTTCCGACAATCCTCTCATCCAAGTTTGTGAATCGTT   | 21374 | A_95_P078500 BP527531     |
| 22070 | 260 | 55 | 716  | AAATAGCAGAGATGAATCAGGTATTGGTGGCTATGCACAAAGGTAATCTGTCCAAG/   | 21382 | A_95_P146302 EB439249     |
| 22076 | 260 | 61 | 1243 | ATCTTAGAACACTGTACACGTTCAAGAAATGGAACATGGAGCTTACTCTAAAATCAC   | 21394 | A_95_P192217 EB643449     |
| 22077 | 260 | 62 | 618  | AAATTCAGAGTCGGAATGAAGTGCACCGTGAAAGTGCACGTGAAAATCGAGATTAT    | 21396 | A_95_P153622 DW002335     |
| 22087 | 260 | 72 | 793  | GTGTGGTACCTGCAGATTTGATGGAAGAGTGATTATGAAATTGAAAATCTAGAGTGC   | 21416 | A_95_P196287 TA16307_4097 |
| 22089 | 260 | 74 | 499  | CCATGGAGCTCACGCTGGATAACATAAAACAAGGGAATTCTAGGACCTGATTTTATGG  | 21420 | A_95_P160927 EH619619     |
| 22090 | 260 | 75 | 382  | TGGACCTTGATTTATACCTGTTGGATGGAATTGTGATAATGTTTATTTTAGAACCTG   | 21422 | A_95_P006616 FS422353     |
| 22094 | 260 | 79 | 964  | TGATAAGCCCGTACAAGAACATGCTCCTACCAAGAGCCTATCTATCGATCAATCATTC  | 21430 | A_95_P141632 TA17597_4097 |
| 22101 | 261 | 1  | 774  | GTATAGGCTATCTGGTGATTACAATCCATTGCATTCAGATCCAACGGTTGCAGGAAT   | 21443 | A_95_P292853 EB428754     |
| 22109 | 261 | 9  | 449  | TGTGCTAACAGTTGTTCACTGCAAATTCATGTCTTTACACCGAATGTTTCTCTTTGT   | 21458 | A_95_P037028 BP128892     |
| 22113 | 261 | 13 | 207  | TTCTGTTTGTGAATTTCAACTGTGGGCCACGGACTGTGGCAGACTGGTAATGAATAT   | 21466 | A_95_P003856 EB443145     |
| 22114 | 261 | 14 | 681  | ACATAGCTGGTCTGTGGGGTTATGGTTGGTTCGATTGATTAATTGATCAGCAACTTT/  | 21467 | A_95_P262641 FG636378     |
| 22124 | 261 | 24 | 340  | TGCTTTAAGTTTTCATCATCTCGCTTTGGTTTTGAACTGTGAAGGATTTAGCCACA/   | 21487 | A_95_P181002 TA12875_4097 |
| 22126 | 261 | 26 | 781  | TTTCTCTTCTGCTGAGGCGCAGCTTCAGGGGTCTCTGTAAACTTTTCTTCTTCTTA    | 21491 | A_95_P135087 EB438311     |
| 22127 | 261 | 27 | 634  | CAATTTTCTGATATTGGTGTCTTTTGTATCTGACGTTGTGTCCTCTTTTGTGACTGC   | 21493 | A_95_P025756 EH618496     |
| 22131 | 261 | 31 | 957  | CAAGAAGAACTCTGAAAATAGTCGCAGTGTATGTAGCTCTGTATGTATATGATAAAG   | 21501 | A_95_P025836 TC52442      |
| 22132 | 261 | 32 | 763  | TCCGTTGCCTCCTTGTGACCTTGGATGATGCAATTCATAATTCAAGCTTGTGTCTGT   | 21503 | A_95_P137942 EB441669     |
| 22136 | 261 | 36 | 218  | AAGGACCAAAATGATGTGCATGAACTGTGGGAAGCTTGTGGGTATGTGTATGATG,    | 21511 | A_95_P194977 TA16019_4097 |
| 22137 | 261 | 37 | 220  | TTGGTACCGGATTCAGGGGATTAGTGCACCTTCAAAAACAACATAACAACATTCCTT   | 21513 | A_95_P131122 EB431250     |
| 22138 | 261 | 38 | 969  | CCAAAGAACAGAATAACTGTGGTGACTATACCCTTCTCTTCTTGTATGGTTTTAACTI  | 21515 | A_95_P195227 TA16069_4097 |
| 22140 | 261 | 40 | 150  | GCTTGAGCCCCGTAGGGTTCATGGGGCTTTGTTATAATGGAGATATAGAAGTTTAAAT  | 21519 | A_95_P093048 BP532122     |
| 22143 | 261 | 43 | 1076 | CAGCATGCTGCAACTTCATGTATTATCATTTTGTCCCAAAAGTTTGGTTGAGAAGTA/  | 21525 | A_95_P220632 TA21649_4097 |
| 22144 | 261 | 44 | 438  | GAAATGCATTTCTTTTGCATCTTGAACCTTTGCAAAGGTGTCCTTTTATGGCCTCTT   | 21527 | A_95_P028726 EB435748     |
| 22145 | 261 | 45 | 857  | AGCCATTTGGAACCAATTACTACTATGTTAAGACTTGTATATCCCAGTATGAACA     | 21529 | A_95_P225022 EB426727     |
| 22147 | 261 | 47 | 537  | CACGACTCACATCCAAGTTTTGGTGTGTATGGCCACTAATCTTGGCAAATATATTGC   | 21533 | A_95_P129732 EB429696     |
| 22149 | 261 | 49 | 799  | GCGTCTTCAGCAAGGCGATGTATCTTTATAGATTCTACTTTTATAGAAGTTTATGGCA  | 21537 | A_95_P009451 TA13632_4097 |
| 22151 | 261 | 51 | 753  | GCTACGAAAGGTGTCTACTTATTTTGTCTGTGGAAACTATAGTTGAATAAACTAGTTT  | 21541 | A_95_P179462 EB439805     |
| 22153 | 261 | 53 | 642  | CTCACATGTTTATTGGCTATGTAACCTGAAGAGAAACATTATTTTATAGGGTGC      | 21544 | A_95_P266026 FG636756     |



|       |     |    |      |                                                              |       |                           |
|-------|-----|----|------|--------------------------------------------------------------|-------|---------------------------|
| 22154 | 261 | 54 | 866  | TGCTATGTTTGGTATGTACGAAGCACTAAAGCAGTACTTTGCAGGAGGCACAGACAC    | 21546 | A_95_P245097 DW000396     |
| 22157 | 261 | 57 | 2289 | TGTGGTTGAGTTTTATGTGTTGTGTTTTGGACGTTAAGTTTTACTGCTGTAGGGTAT    | 21552 | A_95_P258556 TA11872_4097 |
| 22158 | 261 | 58 | 827  | ATCAAGGTCCAGATCACCAGCACCATCTCGCCCAAAACATTTGAGTAAAAGTCCAAA/   | 21554 | A_95_P148342 EB677623     |
| 22163 | 261 | 63 | 845  | TCCAATTTGCCTGGCTTGTGGTTCTGCGTTCAAAGTTGGTATTGATTCACAATTATC    | 21564 | A_95_P000581 TA12317_4097 |
| 22167 | 261 | 67 | 80   | TAGATTAATACACGATCTGTACAAGAGACAGTTGCTTCTTAACCGTAAAATACTTGCA   | 21572 | A_95_P079330 AM793637     |
| 22170 | 261 | 70 | 881  | CTTGTGGAGAGTTACAAAGTGGTCACTGGGCGTATATTCTCAAATACTATCTTTCT     | 21578 | A_95_P214337 EB680047     |
| 22171 | 261 | 71 | 769  | CAAGTTAGAGATTCTCATGCTGACCTATTGAGGCTGTCTCCGCTTTTTATTCTCTTTT/  | 21580 | A_95_P140762 EB444603     |
| 22173 | 261 | 73 | 589  | CTTGCGAGTATGCAAACCTCTTGGTGGTGGTACTGTGTTCAATGTTTTCTAATAACTT   | 21584 | A_95_P188952 TA14687_4097 |
| 22174 | 261 | 74 | 773  | ATTTACCTCCTTGAACATTAGCCAAGTGCTTCTACATGTTGAGACTTGTGGCATTTTT   | 21586 | A_95_P263321 EB678453     |
| 22181 | 261 | 81 | 670  | TCTTTCCAATGAGTGGGTTGACTCCTATGTCCTCTCTGAATTCAGCCTTTTCTTTT     | 21600 | A_95_P164397 EH623635     |
| 22183 | 261 | 83 | 271  | TTTCAAACCCAGAACTGAGATGATTATGCCAACGTTAACGACGTCGTTTCAGACCCC    | 21604 | A_95_P004286 EB450495     |
| 22186 | 262 | 1  | 477  | AAATTGTTGGCGGCTTTATTTCCCTTTTCTTTATGACATGAACTGAACACCTGGTTGC   | 21444 | A_95_P185372 FG632147     |
| 22190 | 262 | 5  | 825  | ATGTATTAAGTTCAACATTTCCCATCTAAGTTCCTCAATTGCCAAAGTCCAGTCACCT   | 21452 | A_95_P218462 TA21179_4097 |
| 22193 | 262 | 8  | 1139 | CTTTGCTTTTACATCTGAAGGACGTCGTTTCAGTGATATATTAGTTATAACTTATGAGCT | 21457 | A_95_P011441 AB281271     |
| 22196 | 262 | 11 | 885  | GGGACTAGATATTGAAACAATCCAACAACACTATACTGTCTAAAGAAGCTGCAAATC.   | 21463 | A_95_P292633 EB427846     |
| 22197 | 262 | 12 | 1543 | GGAACCTTATAAGCCTTTTGTAGGGTTGGCCAAGAAAGTTATGTTATTTGTATTCTTG   | 21465 | A_95_P237544 D79979       |
| 22200 | 262 | 15 | 792  | TTCAGATGAGAGAGACTCAGCTGGCTTTGATCCAAGATTCTTGCTGGTGATCAGTCI    | 21470 | A_95_P270201 FG139295     |
| 22202 | 262 | 17 | 845  | CATGGGAGCATTTTTGTGGCCCATCATTTATATATGAAAGTAATACTTTTGTGATGC    | 21474 | A_95_P149747 EB679700     |
| 22203 | 262 | 18 | 874  | GTTGAGAAGCAAGTTGCACTGAGCCATAGTTCTGTAGTGTTAAGATAATTTCTTACC    | 21476 | A_95_P221067 TA21743_4097 |
| 22204 | 262 | 19 | 573  | CACCTCACATATTCCAAGTACATGGATGACACCTCTAAACATTGTATCTTCCAATTTA   | 21478 | A_95_P046586 BP131437     |
| 22205 | 262 | 20 | 1348 | GCAGTTTTCTCAAACCTGAGTGTCTTTGTGACTTCTTGTGTTGTAACACGTCGGTTTTT  | 21480 | A_95_P198592 TA16812_4097 |
| 22206 | 262 | 21 | 861  | GTATATGAAGTCTGTTCTTTTTCTGCTCTCTTGTCCGATTTATGATCTTGTAACTCGG/  | 21482 | A_95_P253619 EB424993     |
| 22208 | 262 | 23 | 1801 | TGGGTTTCGACCCATTAGAAGTTGTCTTGATTTTTCTCTAAACCTATGGACTATCTTC   | 21486 | A_95_P028071 TA14479_4097 |
| 22210 | 262 | 25 | 370  | AGGCGGAGAAAAGAAGAAATGAAACCTGTATCCTCAGTTGATGATTGAAGAACCCA.    | 21490 | A_95_P000826 FG643022     |
| 22212 | 262 | 27 | 436  | TCGCTCTCAAGTTTAGTCTACAGTGTCTATCTGTTCCATGTATAATGCTCTTAACTCA/  | 21494 | A_95_P195352 TA16097_4097 |
| 22215 | 262 | 30 | 438  | GGTTTCGTTCTTCTTCTGTGTTCCCGTTGGGAGTTCAATTGATTTGCGATCGAGTTGT   | 21500 | A_95_P093213 BP532181     |
| 22217 | 262 | 32 | 562  | CGTTAATCCACTCCATTAGTTGCAACACTTGAAAAGCGAGAGGATTTGACATGCTGT    | 21504 | A_95_P143667 EB446903     |
| 22223 | 262 | 38 | 713  | AATGAGCAGGTGCACCAGATATTTTCCAGAATGCTTTTGATTCTGTGATGCATTTTG    | 21516 | A_95_P135052 EB438192     |
| 22224 | 262 | 39 | 774  | TAATGTTACTTGCTAGATATTCGATAAATTTTCCCTCTGAAGGTATTTGGCGTTGTG    | 21518 | A_95_P010266 EB677709     |
| 22229 | 262 | 44 | 503  | GTTTAGAAGTTTGGCCTCCTATTTCTTGAAGTCTGGTAATATGGTCCTTTTTTCTCTCT  | 21528 | A_95_P030371 EB444420     |
| 22234 | 262 | 49 | 265  | GTAATGGGTCTAAGCAGGTGACATTTAGTAATTCTGTATTAATTCTTACTTCTGTACC   | 21538 | A_95_P106407 CV017890     |
| 22238 | 262 | 53 | 75   | CTCGAGATGACATGCAGAATAAAGCTTTTCTCAATTTTCAGCTGCTCATTTTAGTTCA/  | 21545 | A_95_P089178 BP530384     |
| 22239 | 262 | 54 | 681  | GAGGAAAGATGGATTTTCTCATGTATATGACTCTCATATGGAATGAAAAGTTCCAT     | 21547 | A_95_P129172 EB425604     |
| 22243 | 262 | 58 | 886  | GCTTAACGAGTAGGCATTGGCTGGTTGGAATTATTTTTCAGCAGAATGCCTTTGCGG/   | 21555 | A_95_P295418 EB446037     |

|       |     |    |      |                                                             |       |                           |
|-------|-----|----|------|-------------------------------------------------------------|-------|---------------------------|
| 22252 | 262 | 67 | 394  | ATTCTGATCCAGAGTATGTTCCCTATCCACTGAGTAAGTAAATAACTATCAAGAACGAA | 21573 | A_95_P233009 BP529129     |
| 22254 | 262 | 69 | 422  | TGACATGTTGAGTAATTTTCTTCTCTTGCAAAGTTATTGGCTGAGAAAATGGCCGTG   | 21577 | A_95_P234204 TA18423_4097 |
| 22257 | 262 | 72 | 810  | GGCTCTATTGACTATATAGAGTTCATCACTGCCACCATGCATAAACACACTGAATTC   | 21583 | A_95_P029941 AJ549110     |
| 22258 | 262 | 73 | 767  | AATTGGTGAATTATTTAGTGGTAGTGGACTTGCTATGCCTGTTGAAATTGTTCTTTT   | 21585 | A_95_P192587 EH624379     |
| 22260 | 262 | 75 | 498  | TGCCGAGGTATTTACCTGGAGTTTATTTTCCGTTTGTTCATCAACTACTGAAGAAAA   | 21589 | A_95_P202717 TA17694_4097 |
| 22261 | 262 | 76 | 816  | GTAACATTGAAGCATAACCCTTGCACTGCTATAATGACATTTTTTGTGGGATACA     | 21591 | A_95_P010066 EB438084     |
| 22262 | 262 | 77 | 785  | ACTGTGCTAGCCAAAGGCCTTTTGGCCAGTAGGGACCTTAATCATTATAGTACTTTT   | 21593 | A_95_P185877 TA14009_4097 |
| 22263 | 262 | 78 | 724  | AAGCCAATAAAGCGGCATTGGGAAGATTTAACTTGAGGCAGCAGGCTAATAAAGT     | 21595 | A_95_P138442 EB442211     |
| 22266 | 262 | 81 | 325  | ATATTGACTGCTTGAAGGATCATAAAGTATTAATAAATGGAGCCTGGTGTTCGAA     | 21601 | A_95_P216577 TA20737_4097 |
| 22276 | 263 | 6  | 159  | GCACTTGCTTGAAGCTTTGAATCCAAAGTTTGAACCCTAAATTGGCAATTGCTTAT    | 21620 | A_95_P110077 CV019573     |
| 22277 | 263 | 7  | 781  | CAAAGTAATAAGGCACAGAGTTCTTGTGGTTTTGTCATCAGAAGAGAGCTTTTAG     | 21622 | A_95_P250988 DW000060     |
| 22280 | 263 | 10 | 836  | ATGTACGCTTGAATAAGTCCATGTTCACTGTTGACTCTTAACAATTCATGTTGC      | 21628 | A_95_P291448 EB678771     |
| 22282 | 263 | 12 | 735  | AACAGAATAAGCAGAGACTGGAACCTGCTCGTCAGGTCATATTGGCTGAAGAAAA     | 21632 | A_95_P119007 DV162089     |
| 22287 | 263 | 17 | 618  | TTGTAATTCTACTGAGGTCCTTGAAAGCAATAAACTCCTGTTGTCTCAGTACTTCA    | 21642 | A_95_P022276 TA12820_4097 |
| 22290 | 263 | 20 | 1722 | GAAGACCAAGATGTGTTGAATAAGTTTTGAGGAATGGAGGTGGTGTGCTATTGATA    | 21648 | A_95_P176642 TA11687_4097 |
| 22292 | 263 | 22 | 310  | GGGAGCCATTTGGCCATAATGATTTTAAGGCATTTATATTGCTAATATCTGGAAATA   | 21652 | A_95_P162977 EB433468     |
| 22293 | 263 | 23 | 747  | TTTGTCTAGCGTAAAAACAAACAAGTCACCAGGATACTATGACGGCAGATACTGGAC   | 21654 | A_95_P002651 EV849919     |
| 22298 | 263 | 28 | 931  | TGTGGAAGAGCGATTTATGGACTCAGACAAAGTTGCCCTCCTATTCGAATAATAGT    | 21664 | A_95_P205477 TA18297_4097 |
| 22299 | 263 | 29 | 531  | AAAGCTGTTGCTGGATTGAATCGAACTTGATTTTTGTATGTCATCAAGAACTCCATA   | 21666 | A_95_P202882 TA17736_4097 |
| 22301 | 263 | 31 | 709  | CACCATGGAAAAAGAAATCCATGAATTAATTGTTGAATGAGGAGTTCATGACTAGC    | 21670 | A_95_P227414 EB427201     |
| 22309 | 263 | 39 | 837  | ATTATCACTAGACGGTCTGCTAGATTGCTGTTGCCACATGGTTTGTATCAATGC      | 21685 | A_95_P226704 FG158801     |
| 22317 | 263 | 47 | 582  | TTGGGTGTTCTGAAGGGATGTTTGTATTTTGGATTTTCAATTATGTGACTTTGACCT   | 21701 | A_95_P131957 EB432385     |
| 22321 | 263 | 51 | 620  | AGCTCAGTTGTTTTGGTGATGTTTGTAAATCCATGATGGTTGAGTAATTTTGGTTGTAT | 21708 | A_95_P003986 TA12776_4097 |
| 22326 | 263 | 56 | 565  | CCCGGATCTTGAGAAAATTGAACCTTGTGATTTGTGTGCAAATAATTGAGTCTGGATT  | 21718 | A_95_P010431 DW003182     |
| 22334 | 263 | 64 | 808  | CTGCTTGACCCAATTCATGTTGTTTTTCACTTAACCTCATTCTGTGGAGACCCCTAAAC | 21734 | A_95_P125082 DW004904     |
| 22336 | 263 | 66 | 478  | CCCCCAGATCAAACTGAGAGAGCCTTAGTGGAGAAATGGCCGATAATGAAAAATG     | 21738 | A_95_P087783 BP529878     |
| 22339 | 263 | 69 | 235  | GAAAAGAATCAATGGTAGTAGGTTACTATAGCCTATAGGTGTATTTAGTTGGGAATT   | 21744 | A_95_P155492 EG650101     |
| 22340 | 263 | 70 | 536  | GTTGCAGGGCATCAACATAAGAAGTGCTGAGATGCAGGACACAGCTAAATCCTTTTC   | 21746 | A_95_P282508 FG638289     |
| 22346 | 263 | 76 | 930  | AGCGCATTTCTGACTTTTCAATTGTTCTATGATGGGAATAAAGATGTGATTCCTGGT   | 21757 | A_95_P184707 TA13755_4097 |
| 22359 | 264 | 4  | 1213 | ATTTGTGGTTGAATTATGTTATCCTTTTCCAAGTAAAGCAGTTGTGGCAGTGATGTGA  | 21617 | A_95_P014271 TA12453_4097 |
| 22364 | 264 | 9  | 2185 | TCTTGTGCAGCTAGCAGTGTGGCCATTGACTCTATTGTAACAATATGTTTTACGCGG   | 21627 | A_95_P239109 AJ305044     |
| 22369 | 264 | 14 | 271  | AGGTCCTTGTGTTGTTTCTGGAGATGTACCTAATATTAGTATGTTACTATAGAAG     | 21637 | A_95_P132042 EB432475     |
| 22371 | 264 | 16 | 405  | TTTTGGATGAAATGGTTTTTCCGTTAACCATCTAATTTGTCTAAAGGGAGTCTGGAG   | 21641 | A_95_P154412 EG649582     |
| 22374 | 264 | 19 | 581  | CTCCTTGTGTTTTGACTGCAAGCCAATTTTGTGTTTTTCTAGTTATGGTTTTTGAACC  | 21647 | A_95_P130502 EH622594     |

|       |     |    |      |                                                               |       |                           |
|-------|-----|----|------|---------------------------------------------------------------|-------|---------------------------|
| 22378 | 264 | 23 | 759  | GTTGGACACCATTAAACTCTGACAGCTGTCTTCTATTGGCATATAATTACAAGTATGT    | 21655 | A_95_P011526 DV158374     |
| 22381 | 264 | 26 | 819  | CTGTTGGGAGATATACTGCTTGACCGCTCAAATTCTGCAGTAATGACGCGTTACGTTA    | 21661 | A_95_P230294 EB678800     |
| 22384 | 264 | 29 | 730  | ACAAGCCATCGGATGGATATCATCTGTATGATTGACTGGTCTTGTGTCTTATAATTTT    | 21667 | A_95_P136147 EB439775     |
| 22385 | 264 | 30 | 806  | GAGCTATTGTAAATTCTGATAAAGCAGGTTGTCTGAGTGGCTTCGTTCCCTTTGTCCGTGC | 21669 | A_95_P255149 EH618915     |
| 22389 | 264 | 34 | 481  | CCTCCGGGTGTTTCAGTAAACCAATCTAACGGGTATAGATCGCCTTACGATGGATAT/    | 21677 | A_95_P109657 DV157864     |
| 22390 | 264 | 35 | 618  | GGAGCAAAGATGGCGCAGACAAAAAATCGGAGAATGGGATCAATTTTGTTAAATTC      | 21679 | A_95_P102097 CN949777     |
| 22395 | 264 | 40 | 136  | GAAAATGACGACTCCTTCAGAAAAACAAACTTATTCAAGTTCCTTTTCCCAAAGAAGT    | 21688 | A_95_P034249 AM807789     |
| 22401 | 264 | 46 | 0    | TCTTGTCATCAATCGGAAATCAAGACAAAGCGGGCACTACGGTAAGACGTGAAAAC      | 21700 | A_95_P027106 A_95_P027106 |
| 22402 | 264 | 47 | 800  | TTAGGCTTCTGGCGGAGGTTAACCGGTTAACGGAGAGACTGGTAAGTGGAAATT        | 21702 | A_95_P291948 EB425643     |
| 22403 | 264 | 48 | 445  | ACAATGGGAGAGGGAAAAGTATCCATATGGAAGTAGCATAGCTGTAAGTGCGGTAAC     | 21704 | A_95_P265801 AM819791     |
| 22411 | 264 | 56 | 847  | TCTTGTAACCTTTATAAGGTGGCATCACCACTCAAGAGAGTATTATCTGGACCTTCGC    | 21719 | A_95_P178697 EB424771     |
| 22422 | 264 | 67 | 266  | ATATCTCATGCATTGTTGTCCGATTTAAGGGTAAATCCATGAGATTTATCCCAGTGT     | 21741 | A_95_P094928 BP532935     |
| 22424 | 264 | 69 | 824  | AAGATCATCTTGCATGCTTCAGTTGTCTTTCTTATGGATGATCTTTGTACCCTCTTG     | 21745 | A_95_P294968 EB677552     |
| 22427 | 264 | 72 | 335  | CTGCTGGAGCTTGATAAGAACATTTATATGCTAATAATATAGCCGATGGACCTTGA      | 21751 | A_95_P110102 FS422353     |
| 22429 | 264 | 74 | 320  | CTGTTGCAGCTTGAATTGTAGTGTGAGTTCATATGTAATAGTTTTGCTTTTTGGGT      | 21754 | A_95_P129802 EB429755     |
| 22435 | 264 | 80 | 705  | TTTGGTTTGTGTAATATACAGCTCCTGGATTTCACTCCTCATACATGTTTAGCTTCTG    | 21766 | A_95_P016111 TA12078_4097 |
| 22437 | 264 | 82 | 816  | AATCGGTATCCATATGAGGACTTGTCTCAAGTCTGGCCCACTAGTCTCCAGTTATG      | 21770 | A_95_P224947 EB446595     |
| 22440 | 264 | 85 | 847  | GGCATGAGTTAGCATAGCGATAAGCTGTATTTCTTGTATTATGCTATTAGCTTGATT     | 21776 | A_95_P201997 EB677546     |
| 22442 | 265 | 2  | 911  | GGTTTTTACATTATTGCCATAGTCCAAGTGTACCATTACTTGTGAGATGTATATTTGTC   | 21779 | A_95_P272581 EB451306     |
| 22443 | 265 | 3  | 157  | ATACTATAAGATTTTAGTTTGGAGATCGGTTTCCCTCTTGATCTTACTCAGGACTCATC   | 21781 | A_95_P241855 DQ460163     |
| 22447 | 265 | 7  | 1025 | CCCAGATATCCAGGAAGAGCTGATCTATAAATGTCAATGATAATTATGGATTCTTTGT    | 21789 | A_95_P025426 TA20044_4097 |
| 22448 | 265 | 8  | 546  | ACTTGTTAACTGTGTTTAAAGTTGTTGGACTTGTGGACTGTGTTAAGTGTAACTG       | 21791 | A_95_P003471 DW003643     |
| 22450 | 265 | 10 | 479  | CGCCTGCTATCAGATTTTGTAACTTTCCTGTTGAATTTGAGACATAACAATGTTTTCA    | 21795 | A_95_P021406 EH618371     |
| 22459 | 265 | 19 | 247  | TGGTGGTTTTGGAAATCCGAGAGTTCAGATCGCTCAACTGGTTTTGGAGGATTTGG      | 21813 | A_95_P136037 TA20284_4097 |
| 22463 | 265 | 23 | 739  | TTATCACCTATATCCCTCTTGATGTTCTCAAATTCATCAGCCGTTACACGTTGAGTGGT   | 21821 | A_95_P127512 EB427027     |
| 22469 | 265 | 29 | 239  | CTAGCATTTAAAGCAATAGTGGTAGCTCCTTGTATGTTGATAAAGACTGCATATTCAA    | 21833 | A_95_P160337 EH619036     |
| 22470 | 265 | 30 | 879  | AACTCTCCGACTCACCTGAGAGTGTCCCAATTAATGCACTTATTGCAGTAAAAGGC      | 21835 | A_95_P230399 DW000005     |
| 22472 | 265 | 32 | 696  | TTGGTTTTGTATACATCCTTTGATTGTCCTCTTTAATAATATGGGTTAGAGGCGGCA     | 21839 | A_95_P017941 DW004740     |
| 22474 | 265 | 34 | 804  | ATTAATCTCGACCTCAATCTTCTCCGCCAGAAAACATGTAAACTCTCTGTTTTACAT     | 21843 | A_95_P011681 EB424796     |
| 22475 | 265 | 35 | 595  | AACTGGTAAGAAATGCAAAATATCAGCTTTTAAACCGTTGACGGAGTGTTCCTTCAG     | 21845 | A_95_P068430 BP137128     |
| 22477 | 265 | 37 | 316  | ATCTTAGGGATTGGGCCTGTCTTGTACAGAATATGGTTTAGTAACCGAGTTTTAGT      | 21849 | A_95_P156877 EH614951     |
| 22484 | 265 | 44 | 349  | ATTCATCCGCAAGCCACTATGGTCCGGGGGATTGATACTAATGAGATTAATTTCTTT     | 21863 | A_95_P105682 CV017564     |
| 22485 | 265 | 45 | 876  | AGTCAAGTTTGTCTATCGGTACCTCCCAAGAAGTGTATGTCCTTCATCCTTGTGAT      | 21865 | A_95_P245782 DV161522     |
| 22486 | 265 | 46 | 219  | TATTGTGACCAGCTCGAGAATTTCTCATGGATTGCTAACATCCTTCAGACTTTTCTGCT   | 21867 | A_95_P099493 BP534950     |

|       |     |    |      |                                                              |       |              |              |
|-------|-----|----|------|--------------------------------------------------------------|-------|--------------|--------------|
| 22489 | 265 | 49 | 779  | GGGACTTCCTGTAGATAAATATGTGAGCTCCCTGGCCTTTGTGTATTTGTAATATTA    | 21872 | A_95_P146582 | EB450652     |
| 22505 | 265 | 65 | 271  | CACCCCATAGTTAGGTATTTGCACAATTTCCCTTTCTTTAAATACTGATGTATTGAA    | 21903 | A_95_P150252 | EB680344     |
| 22507 | 265 | 67 | 765  | GGAGCGTGGGTTTCAAGTTGTAATACTGCTATCTGTTTCTGCTAAATATTTGTTATC    | 21907 | A_95_P003276 | TA12450_4097 |
| 22512 | 265 | 72 | 825  | CGGATAGTATAAATAATAAATGTGGTGAGGAAAAACAAGCAAAGGGCGGTACATA      | 21917 | A_95_P226369 | EB681955     |
| 22515 | 265 | 75 | 844  | GGTGCTCTTTTCTTTTGTGTGCTTAGTTTTCAAGCCATGTTACATTGTTTGAACATC    | 21923 | A_95_P220727 | EB447664     |
| 22516 | 265 | 76 | 690  | AGATTGCAAAGGCACAATTAGAAGAACAGAAAAAGGATGCTCTTGAAGCAATGGAA     | 21925 | A_95_P147117 | EB427847     |
| 22518 | 265 | 78 | 561  | GAACCTCCTGTATTCTGCAATAAATTGTGGATTGTGGCATAAGCCTATTAAGAAT      | 21929 | A_95_P020881 | BP128373     |
| 22522 | 265 | 82 | 518  | GTCCTGAACCTAGCGTAAGGACATGTTTTTCAAATGATTGTAATGTGTATATCTTCT    | 21936 | A_95_P121462 | DW001529     |
| 22523 | 265 | 83 | 653  | CAAAGATAACAATGTAGATGATACAGGGGAGAGTCTCATGTTCCAGTCTGCTTACA     | 21937 | A_95_P151272 | EB681482     |
| 22524 | 265 | 84 | 500  | CGACGTCTGATGAGTATGACTGAACATACTGAAGTGTGTATGACTATTGTTGACA      | 21939 | A_95_P154672 | EG649697     |
| 22528 | 266 | 3  | 823  | CTCCTAGCCACCTACTTTTGAATATAAATAAGAGCTGAAATTTTTTGCAGTTGGTT     | 21782 | A_95_P192022 | DV157650     |
| 22530 | 266 | 5  | 864  | CCATGACTATGTCCGAATTTTCATCACTCTATTATTCCAACATTTGTTCAAAGTGAGC   | 21786 | A_95_P217682 | DV162696     |
| 22538 | 266 | 13 | 803  | TCGTGGTTTTCTAGCTGGTGTAGCCAAGTTTATTTATTAATACGCAATCTGGATAAGT   | 21802 | A_95_P011006 | DV157631     |
| 22541 | 266 | 16 | 450  | GGCAACTTGAGGCCCTTAACGCAGATTAGATTACTGAAATATAAAGAGACACATGTT    | 21808 | A_95_P280423 | AM838397     |
| 22542 | 266 | 17 | 570  | ATAATGTTTTGGAGCTTGCAACACAAAGGTGGAACGCCAGAGACCATCCTTGAAAG     | 21810 | A_95_P042521 | BP130380     |
| 22548 | 266 | 23 | 1021 | CACCGTAATCAACTATGTTTAAAGGACTTTTCTGAGACATTCTCGTGTGTTACAATACA  | 21822 | A_95_P009866 | TA13119_4097 |
| 22550 | 266 | 25 | 772  | GTTATTGGTGCATTGAAGATGAGGACCTATTTGAGTGGTATGCCTGAATGTAAGCTT    | 21826 | A_95_P247342 | EB440965     |
| 22551 | 266 | 26 | 906  | CTTTTTGTGTTTCTGGATTTGACTCATCAAATCCTTTTGTGGTTAGTGCCATATAGA    | 21828 | A_95_P028886 | TA15660_4097 |
| 22553 | 266 | 28 | 828  | GCAAACATTTGTATTGCAACTCCATATTACCAAGACTAGTATGGATCAGTGCTCCTCA   | 21832 | A_95_P147357 | EB451738     |
| 22554 | 266 | 29 | 534  | CAGACGTAGCACCGGCTGACTCAAGTGGTTCAAAGAAAGAAAAGGTTAAAGAGTTC     | 21834 | A_95_P222157 | FG134412     |
| 22561 | 266 | 36 | 440  | GGACTTTCGTGCCATTATTTTCAATTTAATCGCCTCCGTTAGACGATCGCAGCAACA    | 21848 | A_95_P087518 | EB430886     |
| 22563 | 266 | 38 | 818  | TGTTTTGCACATTTAAGTATTTAGATACGTCGTTGTCTCCTAACAGTTTTCAGAAGA    | 21852 | A_95_P013861 | EB451303     |
| 22566 | 266 | 41 | 722  | TTTCAGGAGGCAAGACAATGTGCACCTAGTATAGTATTCATTGATGAGATTGATGCT    | 21858 | A_95_P138277 | EB442022     |
| 22571 | 266 | 46 | 897  | CCTTCAATAATACACAGGGATATAAGATCAAGCAATGTAAGTCTCCTATTGGAAGACTAC | 21868 | A_95_P139157 | TA15002_4097 |
| 22572 | 266 | 47 | 300  | AGATTTGCTCGCGACGTGCAAAGTTTTCCAGGAATTAGTTGTGCTTGAGCATGCTGC    | 21869 | A_95_P169031 | EH664574     |
| 22573 | 266 | 48 | 239  | AATTGTCGGGGCCAAGATGATCTTTCAAGTTATACTGCCATCAGCACATATAGGACCG   | 21871 | A_95_P204292 | AJ719171     |
| 22579 | 266 | 54 | 676  | AAATATCAGCAGAATGGAAAATATAAGGAGGTCAAAGAAAGTGGCTACTGTTTGCCT    | 21883 | A_95_P136507 | EB440264     |
| 22582 | 266 | 57 | 767  | GAGCTAGAGGAAGATGATCTTACTTAAATTGATCTTCTCTGAACTGGTTGTAAATTC    | 21889 | A_95_P248612 | EB445511     |
| 22584 | 266 | 59 | 810  | CAAAGCATGTAAGAAGTGTGGCCTTTGGTTTGAAGTACTGTAACAAAATCTTCCCTC    | 21892 | A_95_P115417 | DV157619     |
| 22585 | 266 | 60 | 302  | ACAGAAGTATTAGTCGATTTGACGCCTATTAGCACTTCTTTAGGATTTTGTGTTTTT    | 21894 | A_95_P029741 | BP530883     |
| 22587 | 266 | 62 | 175  | GGCTCCTGGCTATGTAGGTTAGATTCTACTGTACATTTATCGTCATAAAAATGAAC     | 21898 | A_95_P111507 | CV020237     |
| 22589 | 266 | 64 | 562  | TCTTCTGTCTGTGTGCTTCTGAAGGATTTGCTTCAAGGCGAAAATCATTTGTGGT      | 21902 | A_95_P199717 | EB433985     |
| 22590 | 266 | 65 | 688  | TTCCTCGTGAGCTTTTGTCTTACCTATTGGTTGATTATTATAATGGAATGGCTTATA    | 21904 | A_95_P130287 | DV158468     |
| 22596 | 266 | 71 | 327  | GAATCTGCTAGGACTCTGGTTGTTTCAAACCTTTCGAAGAAGCCTATGAACAAGCC     | 21916 | A_95_P242427 | FG627369     |

|       |     |    |      |                                                              |       |                           |
|-------|-----|----|------|--------------------------------------------------------------|-------|---------------------------|
| 22600 | 266 | 75 | 466  | ATTTTGAGAACGATGAGGTCTTAGGTTCAAATCCCCGCGGAGAACAGAAAATACGAC    | 21924 | A_95_P076445 BP526985     |
| 22601 | 266 | 76 | 95   | ATTCTTCCCGAATGCGTAGTTAGCTACAAATATGGACGTCATATGTCAGGTCAAGCA/   | 21926 | A_95_P033974 AJ717975     |
| 22609 | 266 | 84 | 872  | TTGTATTGTTTACAGAAGTTGGGAGCTTCAGCTCGACTTTGCTGATAAAGTTGGTCA/   | 21940 | A_95_P202447 EB678643     |
| 22611 | 267 | 1  | 649  | AATCTGTTGGTTCAATTTCTTCTTGCTTAGTGACTTTCTGACTTGATAACAGGGTGAA/  | 21943 | A_95_P063200 BP135712     |
| 22615 | 267 | 5  | 535  | AGCTGATGACGGAACACTGCAACTTCTTATACACCTTCTGCCATATAGTTATGGC/     | 21951 | A_95_P150292 EB680374     |
| 22616 | 267 | 6  | 273  | GCCTTAGGTGAAAACCTGAAGAAATATCTGAAAATCTGAACTTAGATCTCACTGTCTTC  | 21953 | A_95_P100398 BP535348     |
| 22620 | 267 | 10 | 679  | TCCTCAGTGGATTGGCTGTTCTCTTGTACCGCTAGTATAAATGAATAAAAAATTAATGT  | 21960 | A_95_P016296 EB439650     |
| 22622 | 267 | 12 | 839  | AGCACCATTTGAAGCCCTTAGAGTAGGCAAAGATCCTTGTTCCAGCAGCTGTATCA/    | 21964 | A_95_P196537 TA16360_4097 |
| 22631 | 267 | 21 | 354  | CAATATGGAGTACGACGTTGATGCGGATTAACCTCTATGGCAGAACATAAACCGAGT    | 21981 | A_95_P155692 EG650203     |
| 22633 | 267 | 23 | 791  | AAAGAATTGCTGGTGCAAACTAGACCTGGAAGTCTTCTCCTAATCCAAGAACTGA/     | 21985 | A_95_P284773 EH618908     |
| 22635 | 267 | 25 | 195  | AGCTTCTCTTAAAAGAACAAGCTGATAAGCAAAACAGCATAAATCGAAGGAGACATTC   | 21989 | A_95_P130257 EB430295     |
| 22636 | 267 | 26 | 642  | GTGACTTGTTGCAGGCTCGTGGTTAATTATTGCGCAATGGATGCAGTGTGACAATTT    | 21991 | A_95_P018101 DV157502     |
| 22641 | 267 | 31 | 796  | GCATTGCAATGAGGTTCCCGCTGTCATTCTTAATATAAATTAATGAGTATTTGCTGTT(  | 22001 | A_95_P263156 EB679730     |
| 22644 | 267 | 34 | 509  | TACGAAAAAGCGACTTTGAGATTACCTTTTTTTGAGTTAGGAATGTCTGATGGCCCCG(  | 22007 | A_95_P160772 EH619483     |
| 22645 | 267 | 35 | 864  | TTTAGAGATAGATTTGAGAACCTGCTAGGGGACACCATTGTGGAAATTCAAGTTGGC(   | 22009 | A_95_P247742 EB441079     |
| 22647 | 267 | 37 | 876  | AGTCAATCCTGCAGTTTGGGAGATTAGTGGACACATGGTCTTGAAGAGGAAGGAGG     | 22013 | A_95_P247617 DV998879     |
| 22655 | 267 | 45 | 1042 | TTCATGTTATTATATGGGAGCTAATATTTGTAGTTAAAATGATTGTGGTGGGAGGCC(   | 22029 | A_95_P196867 TA16436_4097 |
| 22657 | 267 | 47 | 494  | CTACTCTTTGGGAAAGTGGATTATTCTGATAGTGTTATTGTTTCAATATGGTCTTGC(   | 22033 | A_95_P228194 FG635177     |
| 22664 | 267 | 54 | 797  | AGTTCATCATCAAAGTGTGATTTTGGCAAGGAAAGTGAAACCTTGCTGTATTATTT     | 22047 | A_95_P201467 TA17431_4097 |
| 22669 | 267 | 59 | 424  | GTTTCATATTGTTGATGTTCCAGGGGCATTCTCGTTTGCCTCCGAAACTAGATGGGTTT  | 22057 | A_95_P219992 TA21513_4097 |
| 22670 | 267 | 60 | 772  | GTATTAGCAGGTATAATCTAGGAGCCGACTGCATAAATTATCCTTCACATATGTTTAA   | 22059 | A_95_P149732 EB679681     |
| 22673 | 267 | 63 | 755  | AAGTTCTTGACTGGAGCGTCCACCGTTGGCAGCATTGCAATTCCGATTATCTTAAAGC   | 22065 | A_95_P269746 EB439815     |
| 22679 | 267 | 69 | 745  | AACCGTCTTTACTGTGAGATTAGAGGATGGAACCTGAGAGGGACAATCATGTGATCT    | 22077 | A_95_P297648 FG198080     |
| 22688 | 267 | 78 | 681  | CAAACCTCACCGATTATAGCTGCCAGTTTAAATTCGGGATTCTACCTCCTCAGCCAGA,  | 22095 | A_95_P190117 DW000151     |
| 22692 | 267 | 82 | 362  | CCGATCAGATCAAAGTTGACGCTCTCAAACGCGCTGAACAGATCAAGTTTCAAATCC(   | 22103 | A_95_P160482 FG161364     |
| 22694 | 267 | 84 | 340  | CGTGTTTCTGGCTCTATCTCTATCAAACCAACTTTCTAAATTTCTTCTGGCCGGAAG    | 22107 | A_95_P103907 CV016747     |
| 22696 | 268 | 1  | 811  | ATGTTTAATCACTACAATCTGTGCAGTTTCACTTCTGACTTTGTTCCAGTTTTGACTA/  | 21944 | A_95_P123802 EB679147     |
| 22700 | 268 | 5  | 762  | GGATGCCGGCTAAGTTTAGTTGGTTGTACAATGTTCTGTCTATATGTTTTCTTTTCATA  | 21952 | A_95_P201407 EH621143     |
| 22701 | 268 | 6  | 473  | AGATGTTAAATGGTGCCATAAATCAGCGGAATTTGTTGCATGAACAACAGTTATGGT    | 21954 | A_95_P274033 AM836818     |
| 22704 | 268 | 9  | 766  | CTGTTTATTGTTGGGTTTTGTTGAACCATGTCTACGGAGACTGTAACTTTTTATTTAT   | 3665  | A_95_P000026 EB439159     |
| 22710 | 268 | 15 | 546  | ATGCTAGCAAATGTTACTGTTGGTGTAAATGAAGCAAACGGTTAAGACCTGTACAT/    | 21970 | A_95_P139627 EB443430     |
| 22714 | 268 | 19 | 618  | AATAGCGTGTCAAGGTATTGCTTCTGATCCATTTTTTTCATCCATCTTAGCAGTTCCAT  | 21978 | A_95_P028241 BP129197     |
| 22716 | 268 | 21 | 802  | CAGGTACTTCCACTTAGTCTTATCATCCTTGAGGCGAGACACTTTTTATAGAGACTTCG, | 21982 | A_95_P115432 DV157637     |
| 22720 | 268 | 25 | 547  | GCTATGGAAGAATAGCTGTATTGCAATGATGAGTTCCATTGTCTTTCTTTGAAGCAA    | 21990 | A_95_P051876 BP132770     |

|       |     |    |      |                                                              |       |                           |
|-------|-----|----|------|--------------------------------------------------------------|-------|---------------------------|
| 22721 | 268 | 26 | 1340 | ATTGAATTAAGAGTATACGAAAACCGAATATGGTGGCTATTCATTGACCCACGCAAA    | 21992 | A_95_P195932 TA16225_4097 |
| 22724 | 268 | 29 | 779  | GTACCGAAACCAAGCACCCCTCGATGAATGTTTTATTTATGTGACACTTTTCTTTAAT   | 21998 | A_95_P011101 EB677998     |
| 22727 | 268 | 32 | 858  | AATTGTTTCCAATATGTTTCAATGGAGATAATGAAACCTCCCCAACAGATGATCCA     | 22004 | A_95_P194887 TA15999_4097 |
| 22730 | 268 | 35 | 501  | TTTGATATGATCAGTTTTTGGGCTGGTGGAGAGATTGCCCCTTTGATTTCTAAAAAA    | 22010 | A_95_P285998 TC56231      |
| 22732 | 268 | 37 | 92   | GAATAATTTTTCATAAGTTATAACCCTCACAATTGCTTCCCTCTCCGTTCTCCAGATA   | 22014 | A_95_P113507 CV021167     |
| 22735 | 268 | 40 | 1257 | ATGACAAACTATGCATGATTGATGTTTCTTGAACCTTCTGAAAGAAGGGAATTTCTTGA  | 22020 | A_95_P239219 AJ608156     |
| 22737 | 268 | 42 | 1828 | CAGGATTTTGTCTGTTTCAATTTACAGATTTTTGTATGAGAGCGTTGCTGAGTTTTCT   | 22024 | A_95_P183997 TA13587_4097 |
| 22739 | 268 | 44 | 222  | GCAAAAATATCCCCAAGAGCTAGTTTCTCTATATTTCAACTCTGTCAAGTGATCATGT/  | 22028 | A_95_P132457 EB432942     |
| 22742 | 268 | 47 | 803  | ACTCAACTCTAACTGAATGCTTTTCAAGCTTTTCCAGTGGTGTACACTTCTGCTGGCC   | 22034 | A_95_P021676 TA15423_4097 |
| 22743 | 268 | 48 | 505  | TTTTGTGGACGTTGGTGTGTCAATTTAGAGGTGCTATTTAGCTCTCTTTTTAGTT      | 22036 | A_95_P122047 DW002104     |
| 22745 | 268 | 50 | 1193 | CTGGGTATGCAGGAAAAGGGTTCTGTTGCTTTTGTGCTTTGATTACGAATTTGCAGCA/  | 22040 | A_95_P209172 TA19132_4097 |
| 22747 | 268 | 52 | 1063 | ATTGAAAAAAGGGTGAAGTACATTTGATCAAGCTTGAAAAACAAGAAATGGCCTTG     | 22044 | A_95_P209147 TA19125_4097 |
| 22749 | 268 | 54 | 918  | GAAAAACGGAATAGCTACCCCGATCGATGTGAATATCAAGAAAGGCTGATTTACTAC    | 22048 | A_95_P034768 AY627865     |
| 22750 | 268 | 55 | 327  | ATCACTGGTTTTGTTATTGCATAGTGTGTTTGTCTTAAAGGCGAAAAGAAATAGATCAA/ | 22050 | A_95_P100973 TA12722_4097 |
| 22753 | 268 | 58 | 404  | GCCATTTAACATCAACATTTGGTTTCAATAGTTTGTCCAAGTTATGGTCAACTAGA/    | 22056 | A_95_P185818 TA13997_4097 |
| 22754 | 268 | 59 | 400  | ATTAGCTGAATCTAGTATTGTGGAGAATGATCCTGACAGTGATGTGCACTTGGCACC    | 22058 | A_95_P079455 BP527769     |
| 22758 | 268 | 63 | 416  | TTTCTGTTGATGTTGGATAATCCTCTCTTATGAGAAAAGGAAAAGCTGACTTTTA      | 22066 | A_95_P089078 BP530340     |
| 22762 | 268 | 67 | 571  | AGAGTGTCTTATACGCTTCTGATTCAACGGAGATGCTGCTGTAAGTTGCCTTTTTCA/   | 22074 | A_95_P192982 TA15573_4097 |
| 22764 | 268 | 69 | 156  | CAATGTGAGATATTCTAACAAAGTCTTTCCCACTTACCGTGGATGATATTAGTACATC   | 22078 | A_95_P131737 EB432136     |
| 22765 | 268 | 70 | 355  | GTGCTAGAGTCATTCCGCTTATTTATACTGAGCCTCCTGAATTTCTCAATCAAAAACTT  | 22080 | A_95_P110817 FG148134     |
| 22769 | 268 | 74 | 116  | GCAGTAATTTAAGGGTTGAGACATGTGTTTTAAATATGCATTGTGGTACGATGATTT(   | 22088 | A_95_P211422 TA19607_4097 |
| 22776 | 268 | 81 | 875  | AGAGGACTTGTCTAAAGTATGTTCTTTGACATTGCCATTAGCTGCTACTATTGAACTT(  | 22102 | A_95_P234254 EB449886     |
| 22777 | 268 | 82 | 487  | TGCAGAGGAGATTGGTCTTTGGATACCTGTTGCAATAATTAATAAGGAACATGATGA    | 22104 | A_95_P145582 EB449334     |
| 22782 | 269 | 2  | 212  | ACCGAAGATTATCAGCATGAGGATGAGAACACATTAGCTAAGGTGATAGCCGGTTTT    | 22112 | A_95_P159902 EH618448     |
| 22790 | 269 | 10 | 849  | AAATGTAATGTTATCTGGTGTGATTGTTATATTTTGGTTTCCCCGAAAGCTTGTGT/    | 22128 | A_95_P216237 DV158578     |
| 22791 | 269 | 11 | 861  | TGTTGAAATCAACTTGACATTCGCTCCTGGCTTCTAACTAGCATGTGTAAACAATCA/   | 22130 | A_95_P020661 TC52386      |
| 22793 | 269 | 13 | 785  | GCGTTGAATTGACTGTGACTTTGTTGTTTCATATTAGTATTGAAATGTTGCGGATCAT/  | 22134 | A_95_P204157 EB426734     |
| 22796 | 269 | 16 | 1561 | GGTTAATGCCCTTCTGTAACAATATGCTTTTGTATGCTCAATAACATCATGTTTGT     | 22140 | A_95_P193882 TA15767_4097 |
| 22797 | 269 | 17 | 515  | GGGTAACACCTGTTGATGAATACGGACGCCCTTATACGGAGATGATTTGGTGT/       | 22142 | A_95_P148042 EB677223     |
| 22798 | 269 | 18 | 769  | CTACCTCCCTCTCACCTCAATGTAATTTGTAATACAGTATATAGTCTCTGTTTCATAGT/ | 22144 | A_95_P195117 TA16047_4097 |
| 22801 | 269 | 21 | 100  | TGGCAGCGTAAGCTGATATCTTTGGATTATTGGTGAATAATTGCTTGCTTCTTGGC/    | 22150 | A_95_P006741 DW002879     |
| 22802 | 269 | 22 | 208  | GACATTTGAGTAGTGTTTTTGTCCTAATGGCACTGAATTGAGATTCTGATATCCGTAT   | 22152 | A_95_P028281 TA13592_4097 |
| 22803 | 269 | 23 | 682  | TCAAACCTCACTTTTCATTATAAATGCAGCCTATGATCATTGGCAGGTAAGGAACATT   | 22154 | A_95_P287143 FG644072     |
| 22807 | 269 | 27 | 667  | GATGGGACTAAGAAATAGTACTGTAATGGAAAATACTTATCACCAGGTGCATGACT     | 22161 | A_95_P015441 TA15029_4097 |

|       |     |    |      |                                                              |       |                           |
|-------|-----|----|------|--------------------------------------------------------------|-------|---------------------------|
| 22809 | 269 | 29 | 829  | CTCTCCTGATTCCTAGCACACTCGAGCCTTTTCTTGATTTCTTAACAGTTAAATGAAT   | 22165 | A_95_P180477 TA12753_4097 |
| 22812 | 269 | 32 | 872  | CCAATATTTTTAGTCAGTGTTATTAGGCAATGATGTGGATTACCCGAGGAAGTTTTT    | 22171 | A_95_P234324 EB678760     |
| 22814 | 269 | 34 | 705  | TTAAAAGGCAAGATCTCCGACTACTATGGAAGTGTATGAAGGAGTGATTAGAGGGG     | 22174 | A_95_P144722 EB448234     |
| 22815 | 269 | 35 | 1074 | CCTGGCACATATGAATATAAGAATGGTCTGCGTGTGAAAAAATATCGAGGTATGGG/    | 22176 | A_95_P148617 AY433959     |
| 22817 | 269 | 37 | 0    | AGTCTCTTTTGTGGATGTGCAAAGATCACGTAACTTCCCTGGTCTCGTAGCAAAAC     | 22180 | A_95_P296633 A_95_P296633 |
| 22822 | 269 | 42 | 455  | TACTCCATAAAAATGAGATTGCAGGGTGAGAAATTTTCATGTTTTGAAGTGGTTGTCA/  | 22190 | A_95_P082720 BP528575     |
| 22824 | 269 | 44 | 461  | CTGTAGATTTCTCTGGGTATTCCGGATTGTTTGAATGCTCATGATTAGTGACACCTCG/  | 22193 | A_95_P281853 AM809865     |
| 22826 | 269 | 46 | 117  | TTGATGAGGGTGAACATCCATTATTTGTAAC TTGGAAGAAAGCAGTGAATGGTGGG(   | 22196 | A_95_P078320 FG622424     |
| 22827 | 269 | 47 | 689  | ATCCGTCTCTCCATCTGTAAGAGTTTGA AAAAATAGTACTGGAGTTGCTCTCTC      | 22198 | A_95_P255429 FG643894     |
| 22829 | 269 | 49 | 701  | CAGGTTTTCTCATCTCACCTCTCCTATGTTTTAGTCTTTTTCAAAGCAAAGCAGTACC   | 22202 | A_95_P246302 EB677787     |
| 22835 | 269 | 55 | 91   | TAATCAATCTCGTAATGTCCTCTAGCAAGAAGCTTATGTGTTGCGGAAGGAGGACTCA   | 22214 | A_95_P061485 TA21256_4097 |
| 22836 | 269 | 56 | 1567 | TAGGAATTTAAGGGTTTTGTATGGTTTTGCCTCTTGGAAGCTATGACTGGCTTGACT    | 22216 | A_95_P187927 TA14458_4097 |
| 22837 | 269 | 57 | 1582 | TTGGGTCTTGCCACTTGTGGATTGCTGTAATATGTTCAACTTGTTTTACGTTGCAATG/  | 22218 | A_95_P201277 TA17389_4097 |
| 22840 | 269 | 60 | 287  | GAACAACATT CAGCTGAGGCAACCAAGTACTTTTTGTCAAAGTTCAGTGACCTTCAAT  | 22223 | A_95_P102442 CV016020     |
| 22841 | 269 | 61 | 743  | TTTCAACTGCTGCTGATTGCTTTGGTGTTGCTTAGAATTTGCTTTGCTGCGTTTCTGG   | 22225 | A_95_P180077 TA12653_4097 |
| 22844 | 269 | 64 | 774  | ATACATCAGTAGAGATCTCAAGCAAATCATCAATTTCCAACGAGGACTCAATAGAGG    | 22231 | A_95_P021541 TA13329_4097 |
| 22847 | 269 | 67 | 518  | ATGTCGTCTTCAGAAGTTAACTCATGAATGAAAGCAACGAAAAGGATCGAGTTTAT     | 22237 | A_95_P223202 TA22199_4097 |
| 22850 | 269 | 70 | 755  | GAGGCTGGACATACTATGAAGCACTAAAGAAATGTGGATGGAAAGGTGAAGTGGAC     | 22243 | A_95_P197862 EB425092     |
| 22851 | 269 | 71 | 770  | ATAAGCAGCTTAAGACTGTGACTGACTACTGAAGATGTTTTTGTCATACAAACCAG     | 22245 | A_95_P164197 EH623345     |
| 22853 | 269 | 73 | 494  | GTTATGTGAATACAGTCCATATATGCAGCACGATGGGTCCATCATTCCCCGTGCATA    | 22249 | A_95_P083485 BP528771     |
| 22862 | 269 | 82 | 797  | TGCTTAGATCCCTGTAGCATGGTGTGACAGA AACTCAGTAATGTACGCTTGTAAATAAG | 22267 | A_95_P124397 EB678771     |
| 22864 | 269 | 84 | 806  | GGTACCTCACACTTAGTTCTAACCATTTGATTTGTTATTGCATCCTTCCAATACCTTTG( | 22271 | A_95_P032641 AF019202     |
| 22867 | 270 | 2  | 784  | GCTCTTTGGCTTCAGTATTTTCTTCTGCATTGGAATTAATACACGTTTGAAAATTCATC  | 22113 | A_95_P215802 TA20568_4097 |
| 22871 | 270 | 6  | 841  | GGAACCTCTGCTGTATTGCTGTATTCTGCAATAATATTGGATTGTGGCATAAGCCT     | 22121 | A_95_P187627 TA14388_4097 |
| 22874 | 270 | 9  | 615  | TGTGGGGTGTTTTCTTCTCAGTTGTA AAATGTTTGCATGTTTCTATTCTGTTATGG    | 22127 | A_95_P197327 TA16538_4097 |
| 22878 | 270 | 13 | 428  | GTCATTTGCTCTTCAGAACTCGATGCTAAATTGACAGCAGAAGTCCATTCTGATCCTG   | 22135 | A_95_P039506 BP129563     |
| 22894 | 270 | 29 | 812  | TGCTTGGATATTTGTTCTTTTTGGCCAAGATTATACTTCTATGGTATTGGCTGGTCATC  | 22166 | A_95_P189172 TA14734_4097 |
| 22895 | 270 | 30 | 674  | TGAGACTTCATCAGAATATGTCAATGCTATGGTCTGAGAATCCTGAACTGAGATTTG/   | 22168 | A_95_P157762 EH615794     |
| 22898 | 270 | 33 | 551  | CTGCATCACCTGTGTGGATCGAAGGGTTCATTACCAAGGAAGAAGCAGAATCTTCAC    | 22173 | A_95_P021441 BP133270     |
| 22900 | 270 | 35 | 745  | AAGAGTTGAGTTTCGTATCATGACTAGGCTGT CATCTAGTGGTATTATCAAGATTTT   | 22177 | A_95_P148997 EB678640     |
| 22902 | 270 | 37 | 153  | TAGAGATCATGTGCAGCTTAGTGATTTGTTGGATGAACGCCCTTCATGTCCTCGAA     | 22181 | A_95_P035988 BP128614     |
| 22903 | 270 | 38 | 0    | AATGATGCCAAGCTGCAAAGAAAGGAGTGAGAGCAGTCAATGGTTTGGTTGATGTT.    | 22183 | A_95_P309388 A_95_P309388 |
| 22904 | 270 | 39 | 817  | GCTGTACTGGCTGTGATCTTACATTACATTATTCTAGACATTAATAAAGTCTCTCATC   | 22185 | A_95_P009251 TA17404_4097 |
| 22905 | 270 | 40 | 1114 | CAGGAAAATCCTATTAGTGTGAGTGGAGTCATCGTTGTAGTCAATTCACTTTTGTAA    | 22187 | A_95_P191362 TA15219_4097 |

|       |     |    |      |                                                              |       |                           |
|-------|-----|----|------|--------------------------------------------------------------|-------|---------------------------|
| 22914 | 270 | 49 | 388  | GACCAAGTGATGGAGCAATATGTAGCATCTTCATCAGTTGTGAGCTTCTACGTACCA/   | 22203 | A_95_P104687 CV017132     |
| 22915 | 270 | 50 | 489  | CCAAAGTTGTTTGCTTAGTTCTACTTCAAAGTGTGATAGCTACTTAGTTTGGAACTCT   | 22205 | A_95_P109572 TA13077_4097 |
| 22919 | 270 | 54 | 67   | GGACATAAATATTGCTGTTAGGAATTCACCTTTTGCAGTTGGAGATATAGAACATGG/   | 22213 | A_95_P147612 EB452125     |
| 22921 | 270 | 56 | 444  | TAGACCACAGGAGTATCCCATTGTTTACTCTTTTATTTCTAATTTTGGTCTTGGAAAGC  | 22217 | A_95_P216927 TA20811_4097 |
| 22925 | 270 | 60 | 428  | GCCACACTTCCAATGTATACTTTTGGTAAAAAGGTTTGTGGTTATTTATGATATCCAC   | 22224 | A_95_P030721 TA19787_4097 |
| 22929 | 270 | 64 | 473  | TTCTCTTCGATCTTCTCTTTGATTGCTTTTTATGAAGTCGCACTGGGAGCTAGTGTGTTG | 22232 | A_95_P087948 BP529925     |
| 22935 | 270 | 70 | 862  | GTGTTCTCATTGCTGCTTGGTAATGCAATTGAACTGTGAAGCTTTAAACATGCAATTC   | 22244 | A_95_P218987 TA21298_4097 |
| 22941 | 270 | 76 | 938  | GTAGTCGGGCAAGACATTTGTTAATATTGTTAATGGGGCAAAGAAGTCATCGTCT      | 22256 | A_95_P014886 TC49215      |
| 22944 | 270 | 79 | 754  | CTTACTGCCGGCCAACGTTTGGATTAAATCTTGAAAGAGGACGCATTCGTGATGAG     | 22262 | A_95_P126882 EB426249     |
| 22948 | 270 | 83 | 1536 | GTCTTCTAAACTGTAGTATGCTGTTGTTGAAGTCAAATATGTTGTTGACTGGTTA      | 22270 | A_95_P177052 AJ421412     |
| 22949 | 270 | 84 | 2545 | CTGTACACTATCTTGCCAAATTTTCTCATTGACAAAGAATTTAGTGGTCTCAATTAGAC  | 22272 | A_95_P215017 X95576       |
| 22954 | 271 | 4  | 466  | TCTAAATTGGAGTCCATTTTATATTTTGCCTGGAAGCTGAATTTGCAGGTGCTACTGG   | 22281 | A_95_P073115 BP526132     |
| 22955 | 271 | 5  | 810  | TATGCAATCGTACAAGAATATCGATGTCAACGCCCGTTTTTCAGTTGCATTTGAAGCT   | 22283 | A_95_P222062 EB427385     |
| 22957 | 271 | 7  | 1212 | GTTCCATTGGGGATGTGATAAAATTTATGTCAAATTTGTGAGGCAATATTTATTCTGC   | 22287 | A_95_P189962 TA14901_4097 |
| 22958 | 271 | 8  | 835  | AGCATTCTGAACTGTCTGAAAGTGTCAACATTGTGGTGTGAGTGAATGTACGCAGC     | 22289 | A_95_P294548 FG136761     |
| 22959 | 271 | 9  | 4550 | GTTGGTTTCTGAAAATTTGACTGCTAACAAATTAAGTCCGTTACAGACACTTAGT      | 22291 | A_95_P007271 AY169238     |
| 22962 | 271 | 12 | 461  | GTACAATCTCAGCATTTCTCCATTGTAACATTCTTAAACCTGCCGATGAAAAAGTT     | 22297 | A_95_P050916 BP132516     |
| 22964 | 271 | 14 | 238  | TTCTTCATCTGGTGAAGGGGGGCTTTGACTATGATTTGGTTATCATTGGAGCTGGT     | 22301 | A_95_P104047 CV016817     |
| 22966 | 271 | 16 | 422  | GTATGAAAGGAAGCTGATTTGGGCTGTAACACGAACTTATCAATATATATCTCCTCTT   | 1861  | A_95_P000051 FG625247     |
| 22968 | 271 | 18 | 782  | AGTTAGCAATAGGGTATGCCCTCTGGTCTTTTTTCTTCTCCTTTTTTCTTGCACCACA   | 22308 | A_95_P187052 EB425115     |
| 22969 | 271 | 19 | 641  | CAACGAATGCATAGTGTAGTGAATACTCTATCTTCTCATGTTATGCAACGAGTA       | 22310 | A_95_P306953 FG636850     |
| 22971 | 271 | 21 | 1788 | GAAACTCCCAGTTCCCTGTTGAGTTTCTTAAACCAATGTTCACTGTTAGTGGTTTTT    | 22314 | A_95_P195947 TA16229_4097 |
| 22973 | 271 | 23 | 748  | AACACCACTGTATTATCTTTGTTGAGGTATAGGCTTAGAATGCCCGTGTGCTTCGAG    | 22318 | A_95_P135687 EB439224     |
| 22976 | 271 | 26 | 713  | GAAGAAGGCCTTGCCACAGATACCCACACTTCAAAGCATGGCATAGATAATGATGCT    | 22324 | A_95_P137262 EB427218     |
| 22977 | 271 | 27 | 99   | AATGCAGACACAGAACTGGTATCCAGGAAGTATCTGGAAAGCCGTTACTCAGGAC      | 22326 | A_95_P242582 DQ460191     |
| 22980 | 271 | 30 | 717  | TATGCAACACGCATGCTATCTGTTATTTGACAGCATGATTGGTGTATTATTTCTGGT    | 22332 | A_95_P013871 DW001454     |
| 22981 | 271 | 31 | 1363 | GATTCTGCCAATTACAAGTGCAGTTGTTAGAACAGTGCCATTTATTCCTGTTGGTTC    | 22334 | A_95_P212207 TA19784_4097 |
| 22985 | 271 | 35 | 699  | AGTGAATATTGAGGTTGATGACGAGCATGTAGGTTTGGTTCATGGAAGCACTTTCTCA   | 22342 | A_95_P119157 DV162231     |
| 22992 | 271 | 42 | 417  | GTTACCTGTTCACTACTATAGGATAGAGTCCAACGGGTACTTGTGCTGTACTGTGTGC   | 22356 | A_95_P173872 EH665711     |
| 22994 | 271 | 44 | 169  | TCAAAGAGTCGCATTGTTGGGAATGCAGTGCAAATTTGGTGGTAAATTTTATCCAA     | 22360 | A_95_P028776 TA16088_4097 |
| 22995 | 271 | 45 | 1444 | GAGCCAAGTTGTGAAATGGCTGTACTTTACTACTTTAGATACTTAGATCTTTTATGCA   | 22362 | A_95_P009741 TA15085_4097 |
| 22996 | 271 | 46 | 0    | TGCCCGTTTGTAGATGAGTTAAGACTATGTGAATGCAGCCCGATACAAGCTTATGAA    | 22364 | A_95_P259146 A_95_P259146 |
| 22999 | 271 | 49 | 253  | GCTTACAAATGCAAGGATTGAAGGCCAACTCTGAAGTGAAGTCTTATAATTTCTGT     | 22370 | A_95_P015011 CV018922     |
| 23002 | 271 | 52 | 220  | CACCATGTTGAAGCTTTCTTTTTGGTTATTCTCACTGGACAATTTAAAGATTTGCATGT  | 22375 | A_95_P026936 EB446137     |



|       |     |    |      |                                                             |       |                           |
|-------|-----|----|------|-------------------------------------------------------------|-------|---------------------------|
| 23003 | 271 | 53 | 95   | GTTAGAGGATATCCCTACTACGCAAGCCTTGTAAGTTATTGTAAATATTCTTACAG    | 22377 | A_95_P141317 EB445072     |
| 23010 | 271 | 60 | 323  | GGATGAAGACTTCCAGTTCTTACAACCCATTGATCTTATCACGAAGGATGTATATGAC  | 22391 | A_95_P042541 BP130384     |
| 23014 | 271 | 64 | 739  | TCCCAAAAGATTCTGCTTTGGGAAGATTAAGGGGAAGTGGATATGTGGCTGGAGAA    | 22399 | A_95_P217967 TA21064_4097 |
| 23017 | 271 | 67 | 862  | GTTTCAGAACCTCTATTTTTGTGCGAAGTGATTATCTAGCATTTCATTTTGCCTGAGC  | 22405 | A_95_P008101 DW005137     |
| 23019 | 271 | 69 | 893  | AGCCATGGTAACAAAAGGCATTATTGAGCCTATATCTGATACGATCATCAACCTTGT   | 22409 | A_95_P244167 DV161257     |
| 23020 | 271 | 70 | 630  | GAAAGGAACGTCCATCTATGTCTCCCTATTCTGATTATTGCGCATTTCATATAGAAA   | 22411 | A_95_P303418 FG635358     |
| 23021 | 271 | 71 | 1626 | CTTACTGGTCACTTGTGTATAAGGGTTCCTTGTGTGTATATAATGATATATGCTGC    | 22413 | A_95_P015386 TA14704_4097 |
| 23022 | 271 | 72 | 656  | CCAAGTATGCTCGGGAAGATGATGACCTCGAAACCTGGAAAGAGATGTTAGTGAA     | 22415 | A_95_P037088 BP128908     |
| 23024 | 271 | 74 | 86   | TACAGATTATCAAAAGGCGGCTATGACTGCCAGTCAAGCAGTCTGGAGATTCGGTTG   | 22419 | A_95_P104642 CV017108     |
| 23027 | 271 | 77 | 744  | AGGGTGTGTTTTAAGCTACTCTTCTTATATGCTATACACCTGATTCTATGTACAAAC   | 22425 | A_95_P136282 EB439968     |
| 23028 | 271 | 78 | 812  | AGCCAGTAGCCATACTGCATCTCTCTCAATCTCTTCAAATGGGTCTGCACTCTAG     | 22427 | A_95_P291838 FG165288     |
| 23029 | 271 | 79 | 616  | GTTCTATGAATTTATGCACTTACTGTTTGCTTGGAGATATCACATCTGCCTGATTTGC  | 22429 | A_95_P005271 DW003255     |
| 23031 | 271 | 81 | 923  | GTTGCCCTGTAAAATTTACCTAAGGCTGGAACATTGTCAAACTCCATATTATTCC     | 22433 | A_95_P007961 D87821       |
| 23032 | 271 | 82 | 0    | TTTCCAACGTGACATGTCAGATCTTACTCATATCTTAATCAAGTTGAAATGGTTTCAT  | 22435 | A_95_P233879 A_95_P233879 |
| 23033 | 271 | 83 | 744  | GTGTGAAAGAACATTGTCGAAAACTAATGATCGACAGAGTATATATATTATCCCG     | 22437 | A_95_P208417 TA18965_4097 |
| 23035 | 271 | 85 | 711  | ATGATTCCTACATCTTCATCGGCAATATGCAAAGAGGAGTTGATGTCATCTCAGTAGC  | 22441 | A_95_P265296 FG187123     |
| 23036 | 272 | 1  | 594  | CGACTCCAAATGCTTGACTAGTAATTTGATGTTTATAGACGTTTTTATCCATGTGGTT  | 22276 | A_95_P185697 TA13969_4097 |
| 23037 | 272 | 2  | 791  | ATATTGCAGCTCTTATGTTCTTGTCAAACAGATAACGGCCTTTTATATATTGCAGCTC  | 22278 | A_95_P258156 TA11894_4097 |
| 23043 | 272 | 8  | 467  | GGGGCATTATAGAGAAAAAGAAGGTTGCTGAACTTGAAGAGTAATAGTAGAAGGA     | 22290 | A_95_P275843 AM792691     |
| 23045 | 272 | 10 | 421  | TTAGCTAACCTATGAAAGAATGGTTATGAATCCACATATTAGTACTAAGCTGTGTGT   | 22294 | A_95_P024376 TC64810      |
| 23046 | 272 | 11 | 1001 | GTGTCTTCCCTGTACCAGTAGGATTAGTAGTTAGCCTTGTATTCTATTATTGGTAAAT  | 22296 | A_95_P010621 TA13551_4097 |
| 23047 | 272 | 12 | 316  | AGGCAGTTAAAGCACATTCTTACTGTGAATACCACTGCTGGTAAACAATGTAAC      | 22298 | A_95_P132622 EB433174     |
| 23049 | 272 | 14 | 841  | CTAGTGCCATGAATACTAGCTTAACTGTAATGACTTGAATCCTTTAGTCGCTTGTTT   | 22302 | A_95_P014846 EB448428     |
| 23050 | 272 | 15 | 291  | TTACGCGGTCAACGAACCTATACTAATGCTAGGACTTGTGCAAGCTAATTCGGAAA    | 22304 | A_95_P007226 TC76984      |
| 23052 | 272 | 17 | 187  | TCCTCCTTGTTATGTCTTGCAAGATTAGATTCATGTACACATAATGGACACTGATCA   | 22307 | A_95_P131037 FG626184     |
| 23055 | 272 | 20 | 372  | AGAAATGTATGGGGCTTTCTGGTGTTCTCACTGCCAGGAACAAAAGAGATGTTTGC    | 22313 | A_95_P031191 BP527417     |
| 23059 | 272 | 24 | 180  | ATGTTACAGTTCACACTTATTTCAATGAGCAGGTGGTACTGATAATCTCTGCGCAGGT  | 22321 | A_95_P089363 BP530472     |
| 23060 | 272 | 25 | 719  | CCCTCATCACGAATCATAATAGTTATGGTGCTGCTGTTTCTTTTTTGGATTATCTTC   | 22323 | A_95_P019721 EB430118     |
| 23061 | 272 | 26 | 104  | ATCTAGTTAAGCCAAGGCAACTTGGAGATCCATCTTATTTGTCGTGGAACCGAAACC   | 22325 | A_95_P162827 EH621828     |
| 23065 | 272 | 30 | 2441 | CTTTTAAACCTCCTGTACATGTCCAAATTTGCTGTGTTTTTAAAGGTGTTGTTTCGAGT | 22333 | A_95_P183422 TA13453_4097 |
| 23067 | 272 | 32 | 420  | TTGTTGACATGCATGGTGTAAAGTACTCAAAAACATAATACATCTGGTTGATCATGT   | 22337 | A_95_P090313 BP530902     |
| 23068 | 272 | 33 | 742  | TATCAGAAGCTCAACAAGAGGGAAGTACTATATCAGGGACAATGTTCCACAGGGGA    | 22339 | A_95_P137982 FG144580     |
| 23070 | 272 | 35 | 653  | AGAGTACTACCGGTAGACTATCAAATAGTTGTATTTATAAGATACTCTATATCGAG    | 22343 | A_95_P288148 FG640697     |
| 23071 | 272 | 36 | 568  | TGCATGGTCTATATGATTTCCCTATGGCTGCTTTTGTGATTCTGATGAAATTGTCAAG  | 22345 | A_95_P012166 DW001649     |

|       |     |    |      |                                                             |       |                           |
|-------|-----|----|------|-------------------------------------------------------------|-------|---------------------------|
| 23072 | 272 | 37 | 897  | CTATGTCCGTAATGTTTGATATTACAGCTTGATCGGGATCTTTATGCTTGCTTAATTT  | 22347 | A_95_P009651 TA13809_4097 |
| 23075 | 272 | 40 | 825  | TCTGTCAACTCTCTGAACTCCATCCTGTTTCATGGAACATTTGCAACTGCGGGATCTG/ | 22353 | A_95_P003516 EB424826     |
| 23076 | 272 | 41 | 772  | CTTTTGGGCTGTCTCTGGTCGATTACATGAGATGCTTAAATGGGATCCACATTACATA  | 22355 | A_95_P128962 EB428739     |
| 23085 | 272 | 50 | 432  | GCTATTTCTGTTTGCTGTTTCTTATGTTCTGTTGTGAATAAAGATTCCGAATTCTC    | 22373 | A_95_P176987 TA11842_4097 |
| 23087 | 272 | 52 | 985  | CAGCTTCCAGATTTTGGATACTTTGCTCTGATCTATATACAACGATCTACTGTT      | 22376 | A_95_P177362 TA11956_4097 |
| 23088 | 272 | 53 | 2849 | GCTTTGAGTGATGATTTTTCAAATGAGATATAAATCCACTGTAGCAGTTTATGCTTCTC | 22378 | A_95_P239574 AB196792     |
| 23094 | 272 | 59 | 848  | CTGCATTCTCATCATGTCTACTTATTATTATCTCGTGTGCACTTGCCCGGTATCATATC | 22390 | A_95_P310123 FG168503     |
| 23095 | 272 | 60 | 317  | TAGGACAATTTCCAGTTGTAATGATGTGATTGTATTGAAATCTTGAGGCAGGCGCCC   | 22392 | A_95_P142487 EB445941     |
| 23099 | 272 | 64 | 36   | GGGAATGTGATTGTGTTAGGAATTCTAGTTGCTAGGGTTGAAGTTTTTGTGTATAI    | 22400 | A_95_P120502 EH616876     |
| 23102 | 272 | 67 | 435  | GTCAAATTAGGGGTGTTTCGATAAAATGGGGAAAATTTATCCTTGATTGATAGTTAGT  | 22406 | A_95_P105307 FG164975     |
| 23103 | 272 | 68 | 188  | GCCCTACTATTGACAAAAATATCATGCTAGTGTGATGACAATCTGGAATAAAAAATGG  | 22408 | A_95_P079250 BP527717     |
| 23106 | 272 | 71 | 775  | ACTGATGTCAGCTTTCTTTGTACATCATCTCTCTTCTCGCAGTTCACGAGACGCTCT   | 22414 | A_95_P271321 FG171937     |
| 23109 | 272 | 74 | 185  | GCTAGCTAATTCTGCACTTTTAGCTTACTTGAGGGAACTTCGATATAATGTAGATTC   | 22420 | A_95_P110752 CV019883     |
| 23111 | 272 | 76 | 279  | CGAATGTTGAGGAGTTAGGGTTGCTATTACCGTTGTTGTATTATGGATTTTGAAATTA  | 22424 | A_95_P015196 TA14982_4097 |
| 23112 | 272 | 77 | 537  | GGTGTTTTGAGCTAAAAAGTAAATTACTTTGTACCATGTGTGGGAAAGAGTATCCCT/  | 22426 | A_95_P017122 EB428883     |
| 23113 | 272 | 78 | 1210 | GTGCGTTGTATACGGAAGACTTGCTCTTTGATACTAATGATGAATAACAGTTTCTTAT  | 22428 | A_95_P011171 AB024511     |
| 23116 | 272 | 81 | 484  | GAAACATTTGGTGATATTGCCATGTGCTGCATGGTACTTTCCTTAGTTTAAATTTTGC  | 22434 | A_95_P030366 FG139988     |
| 23118 | 272 | 83 | 781  | CGTTCTATGGATTAATGTCCAAGAAGTATTAGCACCTGTTTTGTTGTTAACTGTATC   | 22438 | A_95_P117422 DV160333     |
| 23119 | 272 | 84 | 796  | GAATACAAAAGGGCTAACTCTAAAGGAGGCAACAGATTATGTTATAAAAAGAACTACA  | 22440 | A_95_P116472 DV159213     |
| 23125 | 273 | 5  | 580  | CACTAGTGAAATCAGAAGAATTGTTATAGGTCGTGAGCTCTTAAACATCAATAACTC   | 22451 | A_95_P270836 EB436402     |
| 23133 | 273 | 13 | 593  | ATTTTTACCATTGTTTCTCTCCAAGTAAATATTTTAAACCCCAAAGCTTCAGATTGT   | 22467 | A_95_P121677 DW001787     |
| 23134 | 273 | 14 | 686  | CCTCTTTTTTGCCATGGATTGGCTTAAATTTAAGTGATAAGTGAAGTTTTGGGTTTC   | 22469 | A_95_P148732 EB678193     |
| 23139 | 273 | 19 | 690  | CTCTGCTTTATGATCTAGGTTTTGCAGATTGCTCTTGAATTAATGAATGAGTAGTT    | 22479 | A_95_P182477 DW003915     |
| 23141 | 273 | 21 | 967  | ATGCAAAAGACTTGTCTAATTTTCGGTTTTCGGAATAGATGGTTGGTTGAGTTGGTT   | 22483 | A_95_P184157 TA13627_4097 |
| 23150 | 273 | 30 | 518  | GTGGTAGATATGATTACTTTCTGGATTCAAACAGTTCTCTTTGTGTTTAGGTTTTGCAC | 22500 | A_95_P110002 FG158081     |
| 23151 | 273 | 31 | 863  | TAATGTTGCCTTTTGTGAGGTTCTGTTTAACTTGCAAGTGGCAGCTTAGCTTTTGC    | 22502 | A_95_P015961 EB445720     |
| 23156 | 273 | 36 | 426  | GTGAAGAACATTGGCTCATCTACTCTCCTTGTGTTGAAAGTATTTTATGAGGTTTAA   | 22512 | A_95_P096743 FG643824     |
| 23160 | 273 | 40 | 826  | GAGATCTTACAGCTGGTGACCCACTCTAACTTAATTCTGAGTCTTCTGTTCCATTTTC  | 22520 | A_95_P219517 TA21413_4097 |
| 23163 | 273 | 43 | 1808 | GTTGAGTGTCCAGTTTTTGTGTGAGAGAAACAATTACTATGAACTATGTAGACTTCTA  | 22526 | A_95_P239889 X63106       |
| 23169 | 273 | 49 | 653  | GTGAGATCAATCGGGATATGGTGATTGATGCCACTTACAAGGGCAACAAATCCAGA    | 22538 | A_95_P034274 FG147699     |
| 23171 | 273 | 51 | 770  | TCAGTGTCTCTTCTGCAATTGATCTTTCGCTGATTGAAAGTGACGAGGATACCCTC    | 22542 | A_95_P272981 EB680661     |
| 23173 | 273 | 53 | 791  | ATGCAAGTAACTTTCTGTACGAAGGGAATTGGTTTTCATATCTTATTTTGTATCCCGC  | 22546 | A_95_P178577 TA12284_4097 |
| 23182 | 273 | 62 | 874  | CTGATAAGGAGGTCAAATGATTTATTTAAATTCATTGTGTGGCTTGTCTTACTTGT    | 22564 | A_95_P228199 EB678646     |
| 23186 | 273 | 66 | 419  | GATCAGCATTGTGTGGAACCTGTATGAATTTACCCTGCAGTAACAGTTTTGTAACA    | 22572 | A_95_P140232 EB444179     |

|       |     |    |      |                                                              |       |                           |
|-------|-----|----|------|--------------------------------------------------------------|-------|---------------------------|
| 23191 | 273 | 71 | 1061 | CTTCCTGAGACTTTTAGCATTGAAGATGTAAAGTTCAGATGAAGCATCAACACCTATT   | 22581 | A_95_P194742 TA15965_4097 |
| 23195 | 273 | 75 | 701  | GGACAATGGTTTCCCTGCTCGATATTGTGCCAAGAATCGGATGTTGATTAACAAC/     | 22588 | A_95_P256889 EH621249     |
| 23204 | 273 | 84 | 629  | TTGTTTTGCTTATTAGCTGAGCCGAAGTCCCAATCTTTCTGGCTTTGAACAAGCAAA(   | 22606 | A_95_P128522 EB428230     |
| 23209 | 274 | 4  | 445  | GCCTCTTCTGTGATTTCAGATGGATTAATGTATTACTTGAACAAGTCCAATTTTTCCC   | 22450 | A_95_P009316 DW002313     |
| 23214 | 274 | 9  | 880  | AGGGCTTCGACTTTCTCCCCCATTTACCCTTTTGTATCTTTAGCAATGTTTTCTCTGCA  | 22460 | A_95_P015336 DV157622     |
| 23216 | 274 | 11 | 331  | CACGCTGTTGATCCTGTCTACAGTGTTCCAAATTTGTTGTCTTGTAGTTATTGTAA     | 22464 | A_95_P100638 BP535465     |
| 23219 | 274 | 14 | 309  | AATATTTTAGTACAGGCGTACGTTTCGTACATGCTCATTTTATGTACTCCCTCCGTTTCA | 22470 | A_95_P215787 TA20565_4097 |
| 23220 | 274 | 15 | 543  | TTTTCTTAGTGTCTAGATTCTCTTTGTACACATAAGTTCACGTGTCTGTGAGTTACG    | 22472 | A_95_P057961 BP134349     |
| 23221 | 274 | 16 | 739  | ATCTATTTGATGAATGTTAGCAAGGGGAAAATGTAATGTAACCTTGTACTTTGGTTG(   | 22474 | A_95_P013041 EB444220     |
| 23226 | 274 | 21 | 987  | CTGTATCCTTAATTCATTGTTTGTTCCTTACAGATGCATCAACATCTATCAGCAT(     | 22484 | A_95_P199817 TA17073_4097 |
| 23231 | 274 | 26 | 857  | CTGCATTTGCTTTCTTTTCTGTCGATGTTACAGAGATGTAATCTATGAGATCATGAT    | 22493 | A_95_P029871 TC42205      |
| 23236 | 274 | 31 | 797  | TATCATTATATATGCCCGGACCCACCGTATTTTTCTTGTTTTCCATACTTGCATGGC(   | 22503 | A_95_P158527 EH616464     |
| 23242 | 274 | 37 | 1265 | GAACCAAAAACAATTTCCACCTGTGAAATCTCAGCTTCAATAAAAAGTTTCTTCTTGT   | 22515 | A_95_P177167 M14417       |
| 23245 | 274 | 40 | 360  | AATATCCAACGTGCTGCTGTCTATCAGTACTCTGGCTAAACGGACCCTAATTCCTGAT(  | 22521 | A_95_P107487 CV018400     |
| 23249 | 274 | 44 | 645  | AAATTC AAGGGTGTTATAAATGGGAAGAGCTTGACCGTGAATCAGCCACACACGTG(   | 22529 | A_95_P138322 EB442052     |
| 23252 | 274 | 47 | 579  | GACCAAGGGTCCAAGATTTTTCTCGGTTTTGTTTTATATGCAATCCCGGAATTGTC     | 22535 | A_95_P160032 EH618660     |
| 23253 | 274 | 48 | 693  | CACACATTTTCAACCAACAGCAAAGTCTTTTGTAGTTATATATACATGCTGCTCT      | 22537 | A_95_P152822 EB683157     |
| 23254 | 274 | 49 | 542  | ATGCATATTTGTATTAGACTATGTTGGTGTGGAAATCAGCATGTCAACTAATGCATCT   | 22539 | A_95_P130007 FG637879     |
| 23255 | 274 | 50 | 433  | TGCTAACAAATAAAGCATCCCATAGGGTGTGGAGAAGGCTGGATTTGTTAAGGAGG(    | 22541 | A_95_P096583 FG147325     |
| 23258 | 274 | 53 | 4120 | GTATTTAGCTTAGGGAGTCTAATCCTCATGTTGTATAGAGCTATATGTGTATATTGT,   | 22547 | A_95_P200612 U52078       |
| 23262 | 274 | 57 | 824  | TACAAACCATCTTGGTTTAGCAAGCGTTTCGCAAAAACCAAGTATCCCAAATACAGCA(  | 22555 | A_95_P285793 DV999492     |
| 23267 | 274 | 62 | 462  | TTTTGATTACTGATTCCATTCTGTCTGGCACCTTGGCAGAAGGATAAATGATACAAA    | 22565 | A_95_P060665 FS382718     |
| 23271 | 274 | 66 | 420  | TTGACAGGTTGCACTGTGTTTTGGCAGAAGTGATGAGTTTGTGCGAGTTCAAGACTTC(  | 22573 | A_95_P096188 BP533513     |
| 23280 | 274 | 75 | 765  | CCGTGTTATATGGTTGTCAGTTTGAACCCATATGTTAATTTGCTTGATTGTTGAATGA(  | 22589 | A_95_P272716 EB679392     |
| 23282 | 274 | 77 | 627  | TTAGCAAACCTAAAAATGGGGAGAATTGAAGGTGGAGGAGATCAAAGATGTATTG      | 22593 | A_95_P308008 FG643465     |
| 23284 | 274 | 79 | 204  | CAAGAACACAAATTTCAATTGAATCTTCACCTGCTTTTATCAGCGCCATTTCTTCTATT( | 22597 | A_95_P093873 BP532456     |
| 23286 | 274 | 81 | 470  | CCACTTTCTGCTCTGTAGGAGTCTCGGTTTCTGATTTTACTTCTTCTGTTGCCTTTTCAA | 22601 | A_95_P253044 BP528671     |
| 23287 | 274 | 82 | 727  | ATGACGACAAGACTAGTACCTTCACTTGTGCCTCTGCTGATTACTTGATCATCTTCTGC  | 22603 | A_95_P022586 FG160313     |
| 23289 | 274 | 84 | 487  | ATACAGATAACAACAAAGAGGAAGGTCTTCGGGATGGCCCAACAATCAGTATCTACT    | 22607 | A_95_P070800 BP525540     |
| 23292 | 275 | 2  | 1433 | AATTTTATGCCTCAGAAGGAGATTATGTCCATAGATAAAGTTGAACAGGGGGGTG(     | 22612 | A_95_P263366 AM851011     |
| 23296 | 275 | 6  | 863  | GCCTTTACACTGGATGTTTGTATTGTAATATTTCTAGATGTGCAGAAGAAAGAACCTT   | 22620 | A_95_P209717 TA19250_4097 |
| 23299 | 275 | 9  | 777  | ATCATCATCAAATGACAAAATCAGTCAGATGGGGTGAGAGTGGTGGGGAATGAGTC     | 22626 | A_95_P312853 FG152714     |
| 23309 | 275 | 19 | 954  | GCACACCTGATCTATGCCAAGTCATCCATATTTTCTGAACCTTAAATCATAGATCAAT/  | 22646 | A_95_P009666 TA14046_4097 |
| 23310 | 275 | 20 | 633  | GGTTGATTATCTAATTCTACTATGGCTAATTTGCTATGAAAAGTCAAACCTCTGTAG(   | 22648 | A_95_P214087 TA20186_4097 |

|       |     |    |      |                                                              |       |                           |
|-------|-----|----|------|--------------------------------------------------------------|-------|---------------------------|
| 23311 | 275 | 21 | 790  | ATTTCTTTGCCAACCAATTTGGGTGTAATTTCAAGTCAAGTGCAAGGGGTGGTTTAAAC  | 22650 | A_95_P204637 EH615699     |
| 23312 | 275 | 22 | 654  | ACTTTCCTCCCGATTCACTGTTGAACTACGTACCTTCTATATAGTTGCTTTTCTGAGTG  | 22652 | A_95_P028371 TA18058_4097 |
| 23315 | 275 | 25 | 502  | AACTCGTATGGGGCTACAGCTACACCATAGTTTTGTTACCCCAAATGCGAGGAAGTA    | 22658 | A_95_P219682 TA21446_4097 |
| 23317 | 275 | 27 | 512  | GTGCCTGACCATCGGATATGCAAGTGGAGTATCCTACATTTCTTTTTACATTTTTCAGA  | 22662 | A_95_P308193 FG641465     |
| 23318 | 275 | 28 | 390  | TGAGAACAATAAGTCACCAGTGTACTACGCATGGTAGATACTGGACCATGTGGAAC     | 22664 | A_95_P104762 TA11718_4097 |
| 23320 | 275 | 30 | 909  | TTGCATGGGTTAGTGGAACTTGTGCTAGACTCTTCAAGTCGGAAGTACAGTTTGGAC    | 22668 | A_95_P011901 TA13067_4097 |
| 23321 | 275 | 31 | 1221 | AATAATGAGCTTAGTTTTAGACTGCTTGTATTGCGCAGGGCTGGTACTGCTTGCTACT   | 22670 | A_95_P013291 TA13313_4097 |
| 23324 | 275 | 34 | 746  | GTTTGGTCATGTGGTGTACATTATATGTGATGGTTTGTGGGGTGCATACCCGTTTG     | 22676 | A_95_P157807 EH615838     |
| 23325 | 275 | 35 | 1139 | GAAAGTACCTGTAGTCAGCACTGAGTCAATTTACAGAAGAATAAACTGTCAGTAGAA    | 22678 | A_95_P206242 TA18469_4097 |
| 23327 | 275 | 37 | 109  | GCTTTTCAGGAACCTTGTGTATAATTGATGTGAAGCTGTTTGTAGTCAAGATTTGCT    | 22682 | A_95_P065760 BP136418     |
| 23328 | 275 | 38 | 609  | AGATACTCCCAGTGGAAAGTCCGTTGCTGAGACTGGATTTTGTATCACTTACCCTTTA   | 22684 | A_95_P033494 AJ632788     |
| 23332 | 275 | 42 | 732  | TAGGAATGCAATTTCTGGCAGTTTTCTTAATAAAGTTAAAAGTGGGGAATCACCA      | 22692 | A_95_P115727 DV158045     |
| 23333 | 275 | 43 | 819  | GTGTCAGACGGAGTTGTCAAGTCTGTATATCCCAAAGAATTTAAAGAAGCGTATTT     | 22694 | A_95_P230100 TA15601_4097 |
| 23342 | 275 | 52 | 611  | ATCGTTCTGCCTTCTTTCAGTTTTAATATCGGATTTGGAATCAACTATGGAGTTTGTATC | 22712 | A_95_P279833 FG643534     |
| 23343 | 275 | 53 | 181  | ATATACAAATTTACAAGAGGCAAAGTAATATCGGCGAGATATCGTTTCGGTCGTCAT    | 22714 | A_95_P213097 FS409145     |
| 23346 | 275 | 56 | 520  | GATCTCTCCCTTCTATCCTTGTATTAATTAGTATTTGTCAGTGGACATGCATTAGGT    | 22720 | A_95_P278878 AM840564     |
| 23355 | 275 | 65 | 752  | CAAGATTCAGGAAGGGATCATAGTGCATTGACTTCAGGGTCCCTGGATCAATCTCAA    | 22738 | A_95_P229264 EB678951     |
| 23356 | 275 | 66 | 1819 | GACCTGATTTTACGGTGTCTTCAATTGTTGAGGAATCAAGAAGGCTCACCAACATAA    | 22740 | A_95_P191027 TA15141_4097 |
| 23364 | 275 | 74 | 55   | GGTTGGATTGTTGTTAGTTGGATGTTAACTTTGAATGTTGCATTTTGTATGTTGGTT    | 22755 | A_95_P132552 EB433046     |
| 23365 | 275 | 75 | 702  | TGTTTCTCCCTGAATTGGTAACAGAATTCGTTTGAGCTCTAACATTTCCATGGTATGC   | 22757 | A_95_P195197 TA16063_4097 |
| 23366 | 275 | 76 | 175  | GGCCACTATATTTTCATGTGCTATGTTGCTTTTTGTGTTTTAACCTTCTGTACACAGAT  | 22759 | A_95_P141022 EB444818     |
| 23368 | 275 | 78 | 725  | AACTCCAATAAAGGCCATAGTCTTGACCAGGGAACACAAGGCTATATATCCACAAGA    | 22763 | A_95_P291643 DW005133     |
| 23369 | 275 | 79 | 613  | ATGCTGCTGCTGTGTAATCTCTCATCTTCTTAAAAACATTGTGTCATTGGGTATTTAAT  | 22765 | A_95_P022601 FG634827     |
| 23371 | 275 | 81 | 529  | TCAGCAGGACCTTTAGCACCTCCTATGAATATTTCAAGCACTGCAAATTATGCCGCATG  | 22769 | A_95_P063660 BP135840     |
| 23376 | 276 | 1  | 761  | TTTAGCCTTCAACCAGATATCTAACAACTGTGGTATGCTCCACTACACATCTGGTGGC   | 22611 | A_95_P034439 DV161194     |
| 23379 | 276 | 4  | 745  | GTGTTTGAATTGGCCATTGTGATTACACATTTTCTCAGGGTATATACCTGAAATAAG    | 22617 | A_95_P223437 TA22251_4097 |
| 23381 | 276 | 6  | 811  | AGGAGTTCTGATGTAGCAACGAGGAAAAAGTATGCTAATCTGGTTGATTCAAGTCAAC   | 22621 | A_95_P145992 EB449806     |
| 23386 | 276 | 11 | 957  | GTTGAAAGCTATATGCAGATTGTTTTTGCAGTATCTGCTGTCTGCTCTGTATCCCTGT   | 22631 | A_95_P008291 DV161541     |
| 23387 | 276 | 12 | 541  | GTGGACAATACCTCTGATGTATCCCAAATAAAGTTGATAAAACTCTGTGATTGCC      | 22633 | A_95_P006191 TA17267_4097 |
| 23388 | 276 | 13 | 547  | TGGAAAAATGGAGTAATCACTCTCAACACTTTGTAGAAGGAAAATTGGCTTGCAACTT   | 22635 | A_95_P124362 DW004210     |
| 23394 | 276 | 19 | 850  | AAGTTATAGTATCTTGTGCGACAGTGTGCTCTAACAGAGAGTATGCAATGTGAC       | 22647 | A_95_P227279 FG148938     |
| 23395 | 276 | 20 | 420  | TCACAAAGTTTATCGACATCTACAGGGGGTGAATTCATCCTGAAAGCATCATCAC      | 22649 | A_95_P071220 BP525648     |
| 23398 | 276 | 23 | 329  | AACCAGAGGATTTATCGTTGCGAAGATGTTGGTATTTTATGATGATTTTATGGTCCA    | 22655 | A_95_P062675 BP135575     |
| 23401 | 276 | 26 | 519  | CAGGCTATTAGCTATTTTGTGTTTGTGAACAAACAGTTTTTGTGTTGGTATTGTA      | 22661 | A_95_P019871 EB683230     |

|       |     |    |      |                                                             |       |                           |
|-------|-----|----|------|-------------------------------------------------------------|-------|---------------------------|
| 23403 | 276 | 28 | 639  | AATTGGTGGTAATGCAGCAGATCTCAAAGTGAAGAGGATCACACCAGCATTGCAAC    | 22665 | A_95_P053316 BP133146     |
| 23404 | 276 | 29 | 768  | GGGTGTTCTGATACTATAGTCTATAGTTGATGTGATTGTAACGTAATTTTGTGTCT    | 22667 | A_95_P268831 DW003203     |
| 23410 | 276 | 35 | 435  | TATTTTGTATGACATGGGGACATGCTATCTTTTAAAGTGTGGGGTGGGGGATACTCT   | 22679 | A_95_P274613 AM780197     |
| 23415 | 276 | 40 | 1115 | CACGAGAACTGAGGAAATCTATGTAGTAGGCCAATTTTGTACTCATTTTTGTCTGTTA  | 22689 | A_95_P010746 TA14579_4097 |
| 23420 | 276 | 45 | 1303 | TAGTTGTAATAATCATCCTTTAACCCAATCCTGAGTTCAATGATTGACATTTTTCGCCG | 22699 | A_95_P194162 TA15834_4097 |
| 23421 | 276 | 46 | 650  | ATATGACATCCAACAGAATGCTGGCATCCGTTTGTAGTCGCAGAAAAGTTGATCCTGCA | 22701 | A_95_P054281 BP133394     |
| 23424 | 276 | 49 | 650  | CAGGGGAGATGCTACTACTATCTAGTTTTGTTTCTTCGACTACTATCAATATAGAGAG  | 22707 | A_95_P184047 TA13599_4097 |
| 23428 | 276 | 53 | 314  | GTTTCAGATTCAGATAGATGCACATAAAATGTCTGAGCGTTCCTTTGATATGGTT     | 22715 | A_95_P162352 EH621296     |
| 23430 | 276 | 55 | 798  | ACTGCAGTGAATTTGTATGAAGTTGTTTCCATGGTGGTTTAAAGAATATTGATTCCT   | 22719 | A_95_P010961 EB425537     |
| 23431 | 276 | 56 | 849  | CTTCCCGTTCATAGACCAAGGGAAACTCTTTTATAGTAAGTGTAGTGTCCAATAACC   | 22721 | A_95_P246942 DV161533     |
| 23433 | 276 | 58 | 255  | CCAATAAAGTTCTTGCTTTAGGCTCCAAAAATTCAGGGCCCCCTAAAATCATTTCTATA | 22725 | A_95_P033474 AJ632773     |
| 23435 | 276 | 60 | 294  | TAGGTGGTGTACAGTTTATCGTAATCTAGTTAAGTTTGTGAGTCTTTTGTATCGT     | 22729 | A_95_P142052 EB445613     |
| 23436 | 276 | 61 | 441  | AAGGCACCTATGGTACTGTTTATCGCGGTACCTATGACAATCAAGATGTTGCAGTGA   | 22731 | A_95_P201262 FG162155     |
| 23437 | 276 | 62 | 666  | TGATCATTGGTGTCTAGTTTCTACAGGCACGGCATAACAAGGCTATTTACGGGATAC   | 22733 | A_95_P136132 EB643439     |
| 23440 | 276 | 65 | 551  | GGGAGATATTGTGATTCATTCATTCATTCATTCATTCATTCATTCATTCATTCATTCAT | 22739 | A_95_P037921 BP129130     |
| 23449 | 276 | 74 | 79   | TCGACTTGTTTATCGAACAAGGGAATTGTTTGTGATATATACTCTGGAAATTGTCCA   | 22756 | A_95_P002701 TA18356_4097 |
| 23450 | 276 | 75 | 448  | AATACTGTGTTACTTTAACTAGAATTCAGGTTCTTTGCTTGGCCTATTTGCTGCCAAC  | 22758 | A_95_P093878 BP532458     |
| 23452 | 276 | 77 | 742  | CTGCTTTCATGAAGAGGGTAAAAAGGATTTATTCAAGCTGAAGTAATATTGCTGGCT   | 22762 | A_95_P026111 EB439094     |
| 23453 | 276 | 78 | 872  | GATTCGTTCTAGTGGAGTACTTCTTATGCACGTGAACCCTCGTCTCTCCGTCAAAA    | 22764 | A_95_P208617 DV157933     |
| 23456 | 276 | 81 | 612  | GTGGGTGTAACAACCTGTCAACTTTTTCTCTGTGTTGCCTATTATATATCGAGTTCGTC | 22770 | A_95_P141802 FG637949     |
| 23458 | 276 | 83 | 715  | ATCCTACAAGGACAGTACCCTTATCATGCAGCTCCTAAGGGATAATCTCACTTTGTTCT | 22774 | A_95_P045591 BP131186     |
| 23463 | 277 | 3  | 634  | GATAACGAGAGTAGAGAAAAGTGGTGGTGCAGAGCTCTGTGAAGCCAATAATAGAG    | 22783 | A_95_P136157 EB439786     |
| 23465 | 277 | 5  | 1007 | CCAGACAACATTTTTACTTGGTTTGCCTGCTTTTCTTTTGTAAACATTATTGAGCGTTG | 22787 | A_95_P025741 TA17830_4097 |
| 23469 | 277 | 9  | 713  | TTATGAAGCGGATGGCTTAGTTTATGACCTGGTGTGTTGCTGCTGTAAGAGAGGCTG   | 22795 | A_95_P027706 EB681224     |
| 23473 | 277 | 13 | 709  | TACACCACCAGGAACTCCACTAATTTTCAGTTAATGCGGCACAAAGACACAAGTGT    | 22803 | A_95_P303353 FG197665     |
| 23475 | 277 | 15 | 775  | TTGCTGGGATGATAGTTTGTAGTGGGGCTATGATGGAGGCAACAAACATATTGCCAG   | 22807 | A_95_P162002 EH620733     |
| 23476 | 277 | 16 | 526  | CATGACAATTATTCTGTGGCCCTTCAGCGACTGTTGTTGTCAAAGGCCTTTACAGAA   | 22809 | A_95_P064415 BP136045     |
| 23477 | 277 | 17 | 529  | CGAAGAGTAATTGATCAAATTCGCGGCCGGTCTATGAGGAAACGCTTATGATACTA    | 22811 | A_95_P248432 AM794263     |
| 23478 | 277 | 18 | 368  | TCCTTCAGGGCTTGTATAGTTCAAATATTTGTATCCCATTTTGTAGTTGATGCTGA    | 22813 | A_95_P089448 BP530510     |
| 23482 | 277 | 22 | 736  | GACTTCCTCCATGATTATGGAGTAGTTTCCCTTAGAGTTTACGCTATATAGTATTTTG  | 22821 | A_95_P149222 EB678920     |
| 23483 | 277 | 23 | 700  | TACTTAGTTCTCCGGTTAGCTTTTATTCAGTGTGGAGAGGGGGGATTTGATAAGC     | 22823 | A_95_P207712 EB677626     |
| 23486 | 277 | 26 | 1308 | TGTACCATCTCAGAAGGATCATTATATGAAATGTCTTGTCTGCTTCTGCAAATTGGTG  | 22829 | A_95_P208597 TA19002_4097 |
| 23489 | 277 | 29 | 805  | ATGTCAGCAAGTACAACCACACTACGTTACCCAGGATACATGAATAACGACTTGGTT   | 22835 | A_95_P286913 AJ278739     |
| 23491 | 277 | 31 | 251  | GATGGTTGTATTGGCTACAAGCAGTTTTGGTTGAGTTTGAAGTATCAACTGCTTTT    | 22839 | A_95_P130112 EB430110     |

|       |     |    |      |                                                              |       |                           |
|-------|-----|----|------|--------------------------------------------------------------|-------|---------------------------|
| 23492 | 277 | 32 | 381  | CGTGGAGGTGAATCTATTTATGGTGAAAGTTTTGCTGATGAAATTTAGATAAGCAC     | 22841 | A_95_P108067 CV018655     |
| 23498 | 277 | 38 | 242  | AGTTTTGTGTATAATTGTGCTGTCATGGGTTGCTGAGATACGGAGTTGCCGTCATC     | 22853 | A_95_P155062 EG649879     |
| 23506 | 277 | 46 | 281  | AAGAAAATGAGAAGTTATTTGATCGTTTGACAGAGAAAGCCTCTAGCTGGATCAC      | 22868 | A_95_P077145 BP527174     |
| 23507 | 277 | 47 | 538  | TCAGGTCAAAGCACTTATTTCTGGCTATACTTTCTGGTGCCTTAGTACAGAGTTA/     | 22869 | A_95_P004516 EH620311     |
| 23508 | 277 | 48 | 693  | GTACATATAGTTTAAGGAAGCATATTAGGTGTTGTCTTGAACGCTTCTGAAATCTG     | 22871 | A_95_P235829 FG643574     |
| 23515 | 277 | 55 | 100  | ATCCTGCTTGAAGACTGCAACTTCTCGAGATGTTGATGTGATAGGCTAGAACCATT(    | 22885 | A_95_P032996 AF211772     |
| 23523 | 277 | 63 | 554  | CGCCATTTCTTATATTTAGTAAAAGTGAATAGGGATTGATCGGACTAATTTGAA       | 22901 | A_95_P225782 FG631576     |
| 23526 | 277 | 66 | 1936 | CACTGGAATCCCTATTTCTATTCCAATTTCCAATTTTAGTAACTCTGAACATCATGCA(  | 22906 | A_95_P013911 TA13844_4097 |
| 23527 | 277 | 67 | 855  | TTGTTGAGAACCGAGCATTGACAAGCAAAAGGTCCAAAGACAATTTAGTTAAACAT     | 22908 | A_95_P180502 TA12761_4097 |
| 23528 | 277 | 68 | 606  | TATGAATCATAGAGGTTGAAGTGTCTCTCCCTCCTCATTTCCTTTTTCATGAATCC(    | 22910 | A_95_P194707 EH618843     |
| 23529 | 277 | 69 | 631  | GACTGCGTACATGCTATTGATTTGATTTTACTCCGGTTATTGTTTATTGTTACTACCA(  | 22912 | A_95_P089913 EB683516     |
| 23535 | 277 | 75 | 630  | TATAAGAGTTGTTCTTATGCAGGAGGATAATTTATAGCCTTCATCAGTAAAGGTTTGC   | 22924 | A_95_P290938 FG635699     |
| 23541 | 277 | 81 | 162  | GTACGTTGATGCTGCAGCATTAGAAGATAAAATTATTGGAGAGAAGAAAAGTGTG/     | 22936 | A_95_P140237 EB444185     |
| 23542 | 277 | 82 | 300  | GCATTTGAGAACCTGAAATGAATTTTGTCTTTGATCTGAAATGGACAATCTCCACAT    | 22938 | A_95_P097138 BP533891     |
| 23543 | 277 | 83 | 928  | CTTGTAATGCTGAATCTTTTGAAGTATACTATTGAATGAGTTTCCCTCGTTCACCAGGC  | 22940 | A_95_P191297 TA15204_4097 |
| 23545 | 277 | 85 | 566  | GCAGGAGTATGTAAGTTTTTGAAGATTTCCAGACCCTTTTTTGAAGAATTGTGAATTE   | 22944 | A_95_P011671 EB683603     |
| 23547 | 278 | 2  | 774  | GAAGCATGATTGGGTGAGATTCTTCAACAAGTATTATCCAGGAAAAATTTCAAGTG(    | 22782 | A_95_P262901 EB425832     |
| 23555 | 278 | 10 | 599  | CCATGTTGAAAAGCTCCTACTTTGGCCCCCTTTGATTTAGAGTTAATCTTTTATTCTTA/ | 22798 | A_95_P097903 BP534255     |
| 23556 | 278 | 11 | 777  | TGATAGATTGGAATATAGAGCCAGCCTGAAAACATGTTTGAATCTATCTGGATATC/    | 22800 | A_95_P148217 EB677461     |
| 23557 | 278 | 12 | 585  | CACATACAGTACCAATCTATGAAGTTACGCCCTTCTCATGCAATTTCTCGATTGGA`    | 22802 | A_95_P187363 FG134864     |
| 23559 | 278 | 14 | 427  | ACTGAATTCTATAAGATGATAGACAAGATATTGTTGAAAAGTGGGGTGGGGATTGA`    | 22806 | A_95_P092903 BP532039     |
| 23560 | 278 | 15 | 197  | TGCTTTCTTTTATTAATGGATCTTCGGAGTATTCAGCCATATGCCCCGCATCGGGTCCI  | 22808 | A_95_P137437 EB441175     |
| 23562 | 278 | 17 | 485  | AACTACTTGACTAGTGTATGAAGAAGGAGATGCTAGATCAGCACTAATCGCTATG(     | 22812 | A_95_P240594 DQ218337     |
| 23563 | 278 | 18 | 854  | GATTGCCTCCACTATAGCGATGTCCTTTCTGCAAACATCTTGGATGTTGAACAGTGC(   | 22814 | A_95_P292583 EB427721     |
| 23564 | 278 | 19 | 420  | GTCTTTCTGTGCTGAAGTTGCTGAATAGCCGTAGCAGAACTGATGTTACCTTTTGT     | 22816 | A_95_P152932 EB683258     |
| 23569 | 278 | 24 | 486  | TGATTCAAGTGAGCAAGTAGCTGTTGCCAAGATTTGGTAGAATTTGAGAATGAGATA    | 22826 | A_95_P307643 FG639010     |
| 23570 | 278 | 25 | 1120 | TTCTGGGACGAGTTGGAAGAGGAATTCCTAATTTACACGGATGAGACTGATCACA      | 22828 | A_95_P176317 U92011       |
| 23572 | 278 | 27 | 349  | AAGCGCTTTATCATCAGTTGATGTCAAACAGAGTGTTTAAGCATCGACGAGTTTAT     | 22832 | A_95_P101373 CN498813     |
| 23574 | 278 | 29 | 611  | TTTGAGTCTTATACCTGGTAGTATTATGTTATTGTGATCCAGGGGAATCTTTTGT      | 22836 | A_95_P143132 EB446477     |
| 23577 | 278 | 32 | 738  | AACTACTTACATTTTTCAGATTGCTAGGTACTCCTAATGAAGAACTCTGGCCCGGGT    | 22842 | A_95_P146707 EB450817     |
| 23581 | 278 | 36 | 750  | CTAGAATAATTATGCTCTATGCTCATTAAATCAGATCTATGTTGAGAGAATAACTTGG   | 22850 | A_95_P214297 DW003320     |
| 23588 | 278 | 43 | 534  | TATTCTGCCAGTTATGGCTTGTTCATAAGATTGTCTATATTGGGAATGTTGTCTTTCA   | 22863 | A_95_P006326 TA15957_4097 |
| 23590 | 278 | 45 | 423  | TTTTGTTACAGGGGTTCAAAGCTGAACAGGTCTGAACTGAAACAGCATGTGAGGA      | 22867 | A_95_P139197 FG166170     |
| 23592 | 278 | 47 | 815  | CTTTTTCCGACTGACATCCAAGTCCGTTGGTTATTGTAATTTCTGTTGTTATATT(     | 22870 | A_95_P147632 EB452145     |

|       |     |    |      |                                                              |       |              |              |
|-------|-----|----|------|--------------------------------------------------------------|-------|--------------|--------------|
| 23593 | 278 | 48 | 759  | TTATAGGGAGAATGCTCGATATCTTGGCAGTGGAAAGGGATCATGGGTATGAACCTA(   | 22872 | A_95_P267451 | EB677243     |
| 23594 | 278 | 49 | 767  | ACATCTGAAAATCGCTTATATGTCACCAAATGGCAAAGGTAGTACAGCACATGATGT(   | 22874 | A_95_P028536 | EB448450     |
| 23595 | 278 | 50 | 644  | CCAGAAGATCGATGATATGGTTGAAGAAACAAGGGAAACTCATAGTGATCAAATAG     | 22876 | A_95_P272061 | EB447231     |
| 23607 | 278 | 62 | 1337 | AGGCAAGGAGACTTGTCTCTTGTCTCTGTTTGTGAATAATAAAGTCCGAATTATGGT    | 22900 | A_95_P012331 | TA11989_4097 |
| 23611 | 278 | 66 | 712  | CAGCACTGGAAGTGTATAATTACCCCGTTTTTCATAATTTTCAGAGTTATGTTCTTTACA | 22907 | A_95_P236949 | FG135742     |
| 23614 | 278 | 69 | 862  | ATCGAAAAGCTAGTTCTTTGGTAGTCATTTGGCAAACCTTCTAATGGTTGCATCTTGCA  | 22913 | A_95_P295053 | EB444005     |
| 23615 | 278 | 70 | 474  | ACGGCCCTTGTCAATTGTTGTTGTAATAATTGGCTATTAGCGATTGAACATTTTGCTT(  | 22915 | A_95_P306368 | FG635097     |
| 23616 | 278 | 71 | 964  | AGCAGCCCTGTGTATTAGATGGATTTAATGTATTACTTGAAGTCCAAATTTTCCC      | 22917 | A_95_P181672 | TA13038_4097 |
| 23617 | 278 | 72 | 2803 | TGGGGACATGACCGAATCAATTTGATGTATGATTCGGCCTTTCCCTATGTAATCTCC    | 22919 | A_95_P179312 | TA12478_4097 |
| 23618 | 278 | 73 | 526  | AGAGGGGTTTGAGACGTGAAAGACGAAAAGGGGCAAGAAAATCTGTCTTTTGTAT      | 22921 | A_95_P041746 | BP130173     |
| 23620 | 278 | 75 | 668  | TTGCTGCTGCTGCACTTTCAATTGCAATTATCTGAACCAGTGACATTGCTTACACCAA/  | 22925 | A_95_P246337 | TC72511      |
| 23622 | 278 | 77 | 949  | GTAGAGCCAAACCTTGCCGTTTGGCAGCAAACGATCTTTGATTTGGTCTTTGTTGTT    | 22929 | A_95_P015646 | TA18745_4097 |
| 23623 | 278 | 78 | 650  | ACTGGAGACAGACTGAATATATGGATGGTGAAGATGGAGAAGTATCCTGGTTCAAT(    | 22931 | A_95_P214207 | EB449640     |
| 23625 | 278 | 80 | 1503 | TTTCAGTAGTACTGGTGGATCAAATGGCCATGAGTTTGTACTCCAGTTCCAACATTG    | 22935 | A_95_P217657 | TA20981_4097 |
| 23627 | 278 | 82 | 492  | GCTAGTATTACACATTTGTTAGTGATAAGCTGGTTGTAGCTGAAACCTGTTTATCTGT   | 22939 | A_95_P024336 | DW003577     |
| 23628 | 278 | 83 | 792  | CCTTGTCTGCTGTTTGTGTATGACATATTTGGGTTTTCTATTCCGAGAGATTCTTTG    | 22941 | A_95_P184277 | DV161576     |
| 23629 | 278 | 84 | 777  | AATCACTTGACAAGGTTTGTGCGCCTATAATGATGAAACCTAAGCCAGCTAAGCCGG    | 22943 | A_95_P226534 | FG132790     |
| 23630 | 278 | 85 | 410  | CCCCTGCTTGAAACCTACCTCCATGGTGTGTATTGACTAAGAAGAGCTATATAAG(     | 22945 | A_95_P078765 | BP527598     |
| 23637 | 279 | 7  | 923  | TATTCTGAAGATGTTTCTGTAGCCCTGCTTGTGCTATTCAAACCTTTCTAGTATTATG   | 22958 | A_95_P206552 | TA18543_4097 |
| 23645 | 279 | 15 | 565  | CCACAGCACTCATGCATCAGAAGTCTACACGCTTATTAACGCTTTTATTACTGCATA/   | 22973 | A_95_P024746 | BP130288     |
| 23646 | 279 | 16 | 760  | CTATGGCAGGGAAAGAAACCTATATCTAGTGGCATTGTTTTGTTTGTAGACTTTTTGA   | 22975 | A_95_P006321 | TA15419_4097 |
| 23647 | 279 | 17 | 427  | CTGTAAGGTTTTCTAATATGATATTCGTATGAAAGGAAGCTGATTTGGGCTGTAACA(   | 22977 | A_95_P003141 | CV020904     |
| 23652 | 279 | 22 | 98   | AAGAATGTAGGGAAAAATACAGATGCTGTGTATGAAGTGAAGGTGAACGCGCCGTC     | 22987 | A_95_P105387 | CV017445     |
| 23658 | 279 | 28 | 883  | GGGAAATTTAGTTCTAGTGTCTGATGCTGGAATTATGGTCTGATGAAATTTTCGATTCT  | 22998 | A_95_P176437 | Y09506       |
| 23661 | 279 | 31 | 572  | CAAAGCCGCGAAGATCGTTAAACTTTGAACGGCGAACGAGATATACTCCATAATGGT    | 23004 | A_95_P114782 | CV021755     |
| 23662 | 279 | 32 | 1351 | AGCAACTGATATCTAGTCTCCAAGTGTGTTGTGCTTGTGCTTTTCTGGCATTCTGAG(   | 23006 | A_95_P183352 | TA13439_4097 |
| 23663 | 279 | 33 | 552  | GTTGACAAGCGTCAGTGGATGACAATATCTAATTGTGGCTTTCTTGGTGTGTTGATTA   | 23008 | A_95_P150877 | EB681015     |
| 23667 | 279 | 37 | 428  | GGAATCAAACACTCAGATCTACTTGGCAAGTTGGCAATGAATTCCTCCCTCCAACCT    | 23016 | A_95_P282503 | AM806329     |
| 23668 | 279 | 38 | 782  | GTGATTCTCACACTGCGAAGTAATGTAATTTGGCATGAAAGTTGCATGCTTTTTTGTAGT | 23018 | A_95_P296508 | EB677472     |
| 23672 | 279 | 42 | 235  | AATATTAGAGAGATGCTTACTGGCGCTGCATTGATGGACGAAGCAAACAGGACAAC     | 23026 | A_95_P207862 | FG158493     |
| 23674 | 279 | 44 | 1100 | CATATGTGTTGTTCTATCGAAGAGTTAAAGTTCAACAAAATGGAGTTGTGGGAGGGC    | 23030 | A_95_P214217 | TA20214_4097 |
| 23679 | 279 | 49 | 723  | GTCGGGTCTTACTGTAATTGGTCGTTTTTAAAACCTACAGTGCAAGTTAGAATTGGA    | 23040 | A_95_P026081 | FG168780     |
| 23680 | 279 | 50 | 476  | GCACTGATAAGCAATAAGTACATGACATGTATCTTTCACATAAGGCTTATCAACCAAC   | 23042 | A_95_P252914 | FG633958     |
| 23681 | 279 | 51 | 401  | TCAAGAGGAAAGATTCACGAACCTCAAATTAATGTGGAAGAAGAATTGAAACCGTT/    | 23044 | A_95_P096278 | BP533555     |

|       |     |    |      |                                                               |                                              |       |              |              |
|-------|-----|----|------|---------------------------------------------------------------|----------------------------------------------|-------|--------------|--------------|
| 23683 | 279 | 53 | 1244 | TGCAGGATGAATGTC                                               | ACTGTGTACCTTTGGATGTTTCATGTCTATTCTTCTTTCTTTT( | 23048 | A_95_P000401 | AY220080     |
| 23686 | 279 | 56 | 853  | CTAGCTTTTATTGTATCAGATAATGAAGGCAAAGGTGTCGTGCCTTAGCTTTGAGTG/    |                                              | 23054 | A_95_P193207 | TA15621_4097 |
| 23691 | 279 | 61 | 766  | AGTGTCTCAATTAGTTCATCAAACCCAGACTGTTTGTGTCTGGGTCCTGTGACTCAA     |                                              | 23063 | A_95_P121222 | AF249743     |
| 23693 | 279 | 63 | 751  | GGATTTTACTGGGTAGTTGTTGTTGTTGTTATTCTTATACTGTCTGTTATGTATCCCTTT( |                                              | 23066 | A_95_P006226 | AB257509     |
| 23694 | 279 | 64 | 1220 | GCTGCAAGTTAGGGATTTTATCAGAGGAATTTAACGTTCCCTTTTGATCACACATGAAA   |                                              | 23068 | A_95_P033061 | AF289466     |
| 23695 | 279 | 65 | 736  | ATGGGTCTCCAAGGCTTATGAACGCACTGTTCAACTTATAGAGGAGCACAAGGAACA     |                                              | 23070 | A_95_P216462 | EB447668     |
| 23701 | 279 | 71 | 307  | TTGATGCAAGACTTGTGTCTGTAGAGTGAAAAATAACGGGTTTGCAGTTAATTATCTT    |                                              | 23081 | A_95_P199362 | TA16978_4097 |
| 23703 | 279 | 73 | 421  | AGTGGAGTATGAGAACTTGAATAGTAAACCTTCTAGCAGCTTTTTATCCTGACCTTT(    |                                              | 23085 | A_95_P132762 | EB433475     |
| 23707 | 279 | 77 | 439  | TTCCAAGATAAGCACAAGTTTTCCCGTTGAAGCGCAATTACTCGGTCTCATTTTGCTG    |                                              | 23093 | A_95_P025046 | BP533776     |
| 23709 | 279 | 79 | 389  | CTCTGCTTGTATTCTGGGGAGCCCTGAAAATTTCCCCATTCTTGGGCTGTAAAAGT,     |                                              | 23097 | A_95_P094433 | BP532711     |
| 23711 | 279 | 81 | 396  | TGGCTTGCTAATTCCCGTGTGCGAAAGAATGCTACTATTATTTATGTTTGAACCTTTT    |                                              | 23101 | A_95_P000786 | EH620721     |
| 23716 | 280 | 1  | 748  | CTATTGCCAAACAGTTTTGGAACAATCTGTAATCCAGTTTGTGTTGAGAGCTATTAGT    |                                              | 22947 | A_95_P213412 | TA20040_4097 |
| 23718 | 280 | 3  | 694  | CAGTAGCATTTACATATCTTACTATCAGTACGGCATTGTGAAGTTACTATACTGGAAT.   |                                              | 22951 | A_95_P015226 | TA15040_4097 |
| 23723 | 280 | 8  | 746  | GCTTGACATGTACCTTCTGCTGTTTTGACTACTGACTTGTGGCATTATATAAAAAATTT   |                                              | 22961 | A_95_P117172 | DV159969     |
| 23724 | 280 | 9  | 0    | CCACGTTAAATCCAATTTTTTCTAGTGTTGTAATGTCTTAATACAAGTTGGCTTTTTGC   |                                              | 22962 | A_95_P025591 | A_95_P025591 |
| 23725 | 280 | 10 | 1716 | GCGCTGCTACTATGCTCTTTGTGCTTTTAGCTGTTTGTGTTATTTTGCTTGAATTTAA,   |                                              | 22964 | A_95_P011796 | TA14578_4097 |
| 23727 | 280 | 12 | 1719 | CACTCGATTGTGTTGGCTTAATTATCTGTTGTGTACGATTCTATGAATCATGGAATTI    |                                              | 22968 | A_95_P032911 | AF198498     |
| 23729 | 280 | 14 | 664  | TGGCTTCTAGCACTTGAATGAGGTCTCTGCATCAAAAATTTGATCACACCTATCCA      |                                              | 22972 | A_95_P119232 | DV162340     |
| 23731 | 280 | 16 | 491  | ACTGTATCTGTATAAAATTCAGAGGGGGACACTTGTAGTACTGTGAATATGCATAC,     |                                              | 22976 | A_95_P130117 | EB430114     |
| 23734 | 280 | 19 | 363  | TAATGTTGGTGCTTCTTCCAATCATCTGGCAATTACTGCCTGCAAGCAGTTAAC(       |                                              | 22982 | A_95_P066055 | BP136496     |
| 23735 | 280 | 20 | 326  | CTCTATCGCGCTGAGTATAATATAGAGCTCCTTGATGCTGGTTCATTTTATTAATGA     |                                              | 22984 | A_95_P095258 | BP533102     |
| 23736 | 280 | 21 | 849  | CTCTATCGGGCACTGGTTATAAGTGCTTGAATAGTATGTGTTTTTCATGTAAGCTTAA    |                                              | 22986 | A_95_P208737 | DV999621     |
| 23738 | 280 | 23 | 746  | CTGACTGAGAATTGTTGGATATGGACTTCATACAGTCTGAGAGAGCGAATACGACGT     |                                              | 22990 | A_95_P285803 | FG166736     |
| 23739 | 280 | 24 | 860  | GCGTCTTTTGGTATGGTCTCATGCTTGAATGTGGCATCTATTAATTCTTGAATTTT      |                                              | 22991 | A_95_P267921 | DV998765     |
| 23741 | 280 | 26 | 372  | GATGCGATCAGTAGAGGGATCTTTATCTTTAGTAAAAGATGTTACTGCTCTTTTGAAA    |                                              | 22995 | A_95_P005716 | GH986496     |
| 23742 | 280 | 27 | 179  | ACGACACCACCTGCAAATGGTAAAACTTTCTCTACCACCATGCAACTTATCTTGGCTA    |                                              | 22997 | A_95_P062790 | BP135606     |
| 23747 | 280 | 32 | 741  | CTTTCTGAGACATCGTATGGTTGTCATTTTATTAGTCTCTGCAAAAACTCGTGCCGCI    |                                              | 23007 | A_95_P007001 | TA14674_4097 |
| 23748 | 280 | 33 | 283  | ATGCCAATGACAGAAGTTGAATATGGATTTGTGATAATGCTAGTACCTTGTCTATTAG(   |                                              | 23009 | A_95_P105227 | BP534328     |
| 23749 | 280 | 34 | 227  | GCACGACCTCTGAAGATGGAAAGCATCAATCTATATACCTTACAAGTTATAAGACAA     |                                              | 23011 | A_95_P106227 | CV017813     |
| 23750 | 280 | 35 | 658  | CATGTTCTTGGATTATAGAAGTAACAATAGCTGGATGGGCAAGAAAAGTAAAGAACA     |                                              | 23013 | A_95_P233074 | FG640747     |
| 23751 | 280 | 36 | 205  | CTGGTCATTGCTGTGTGTGTTTGTCTATTTTATCAAAGCACTGTATTTGCTTTCTGTGG   |                                              | 23015 | A_95_P006501 | CV016456     |
| 23752 | 280 | 37 | 712  | ATGGATATTAAGGCTTCAAGTTGCTCTGCCCTTCTATTCAATTTTACTGTTCTGTTT,    |                                              | 23017 | A_95_P189222 | DV158664     |
| 23753 | 280 | 38 | 116  | CCTTGTACAGGTTGCATAAGTAAAGAATGAAATGGCTGATCTAGATTCTTTACTCCT     |                                              | 23019 | A_95_P107472 | CV018391     |
| 23756 | 280 | 41 | 968  | CAAGTACTATGCTATCCTATGTGTCATTTGGATTTGCGCTTTGTCTTTATGTAAGTGT.   |                                              | 23025 | A_95_P223302 | TA22220_4097 |



|       |     |    |      |                                                              |       |              |              |
|-------|-----|----|------|--------------------------------------------------------------|-------|--------------|--------------|
| 23757 | 280 | 42 | 519  | TTCTCTGAATATTCCAGCTGACAACATGCTTTAAACCTCTTTAGTTCATAGTTGCTTTG  | 23027 | A_95_P209842 | TA19275_4097 |
| 23759 | 280 | 44 | 1483 | GGGATTTGATGAATGCAAATCACCTTCCGTCAAATTATTAAGTTAGCCTGAATGTTAT   | 23031 | A_95_P008546 | TA13125_4097 |
| 23762 | 280 | 47 | 681  | TTTGATTTCTTGCTTGTATCACTTCCGGACAGAAGTTTTAATTGAAATCCTCTTAAAG   | 23037 | A_95_P117637 | DV160554     |
| 23763 | 280 | 48 | 843  | TTAAATCCAGGCCAATGGTCTACACTACAACATTTGAGACTCGAAAATAATCGGCTCA   | 23039 | A_95_P126492 | EB425810     |
| 23764 | 280 | 49 | 778  | GCCCCAAGAGAAAGGTGAAAATAAGCAAGTTATGAAGAAAGTAGCCTCTAACGGT      | 23041 | A_95_P129047 | EB428811     |
| 23765 | 280 | 50 | 814  | ATTTCTTAAGAATCTGTCTTCTCTGCCTTTGTTGAGTGAAGGTTGGTTCAAATTGCCTA  | 23043 | A_95_P129042 | EB428808     |
| 23766 | 280 | 51 | 850  | CAGATAACAAGGGTGGATAGTGCTTGATCTATTCTTGACTTGTCTACTATTCATCTTA   | 23045 | A_95_P197557 | DW004644     |
| 23768 | 280 | 53 | 104  | AAACTCCGACTGTTCAATCAGCCTAACTTGAACAAATTTGTGGGATTGGGACGACCI    | 23049 | A_95_P192537 | TA15473_4097 |
| 23769 | 280 | 54 | 796  | TTTATGGATCCTGTATGATGAATGACATTGAATTAGTGCTTAAGGCAATGGTTTCTGT   | 23051 | A_95_P228469 | EB679710     |
| 23770 | 280 | 55 | 276  | ATTCCTCCTATGTTCACTCCAACGAATCCCATCAGATCAGAGGCTTGCGATTTGAACA   | 23053 | A_95_P110852 | CV019939     |
| 23774 | 280 | 59 | 351  | ATCCAACGGAAGTGTCAAATAAATGGTTGGACTTGTATATGTTACGGATTTACCATCA   | 23060 | A_95_P109032 | CV019119     |
| 23780 | 280 | 65 | 436  | GGTGATAATTGTGGGGGAGAACTTATTTTTCTTCTCGTTTTAAAGGCCAATGCTAATT   | 23071 | A_95_P026491 | TA12980_4097 |
| 23785 | 280 | 70 | 487  | ATGCCTAAACAGAGTAACAACAACAACAACAACCCAGTATATAATCCCCTAGTCA      | 23080 | A_95_P123197 | DW003075     |
| 23786 | 280 | 71 | 310  | TAAGCATCCCTTAATCCCCTAGGCGTGTAGTGGGTGCCAACTGGTTATATTGCAATGA   | 23082 | A_95_P160872 | EH619574     |
| 23788 | 280 | 73 | 1415 | GGTAGGAGGGGAATTGTGTTGGTGTTCACCTGTTAACAAAATGAAACATGTTTTATT    | 23086 | A_95_P204412 | TA18060_4097 |
| 23789 | 280 | 74 | 171  | CAATGTGTAATCTCTGCCATGTACTATAGTCAACTGTTTGTGAAGAATAAGGACTACG   | 23088 | A_95_P114222 | CV021500     |
| 23790 | 280 | 75 | 115  | GTTGGTTATAAGATTTGTTATCCCAATGGGTTGGTCTGTAAGCATTGTTTGTGTTTGC   | 23090 | A_95_P144072 | EB447233     |
| 23791 | 280 | 76 | 743  | GAAAAAATGTTCAACATTTGGCATGCAGCACAACGTTCTACGTCCTTTCCACCTGGC    | 23092 | A_95_P245617 | EB451352     |
| 23794 | 280 | 79 | 659  | TATCATTACTGTTGGATATTTTCTGAGACTACTTGTGGGTTTCTAGATCTAACAAAGTTC | 23098 | A_95_P284413 | FG643166     |
| 23798 | 280 | 83 | 821  | TGTAGGAAGAGCTGCAAAGCTTGTTAACTTATTATACTTCTTCTCTAAATCTGTTCA    | 23106 | A_95_P216037 | EB447902     |
| 23799 | 280 | 84 | 482  | ATGTTTTCTTTGTGTAGTAATTGGTGCCTGCTGGTAACATATTAAGCTAAGCCCGGT    | 23108 | A_95_P259446 | EB437617     |
| 23800 | 280 | 85 | 300  | GGCACTAAAATCCTTGGATTTTCTAGACGAAACATGTCGTTTCTGTTCTACTAGCGCAC  | 23110 | A_95_P095498 | BP533214     |
| 23805 | 281 | 5  | 1047 | CTGCTCTTTTCTTGATGCTGAATTAATGTTAGAAGGTGGACGCACAAACAACATTAT    | 23119 | A_95_P008036 | TA16363_4097 |
| 23812 | 281 | 12 | 510  | GTCTTTTAGTTTTACCTGTTTTTTCAGTGATAATAAGTTTAGCGAGACCTCGAAGCTA   | 23132 | A_95_P125322 | DW005120     |
| 23814 | 281 | 14 | 856  | CAGAATGAAGAGAGAGCTGATGGGTTCAATGGATATTGTTTGTCACTGCACTTCTCA    | 23136 | A_95_P227929 | FG144415     |
| 23819 | 281 | 19 | 592  | ACCGAGGTCAGTCTTAAGAAGACAAAAACAATTTTGTCTCATCATGTTGTATCTG      | 23146 | A_95_P276523 | FG185842     |
| 23821 | 281 | 21 | 444  | TAAGTGCAGGGTGGGTAAGGTTGATGTGTGTAATCTTACAGTATAGTTTTCAGCTAAG   | 23150 | A_95_P252589 | EH622151     |
| 23822 | 281 | 22 | 410  | GGGGTTTTCTAAATTAGGTTTTCGAAAGAAGGATGAGAATTCCTCTGTGGATAGTTT    | 23152 | A_95_P097818 | FG643580     |
| 23823 | 281 | 23 | 270  | CCTTTAAGACTCGTAACGTACGTATTTTTCAGCAATGGGAACAACCTTGAACATACTGCA | 23154 | A_95_P093968 | BP532507     |
| 23824 | 281 | 24 | 1172 | GGAGGACTGCTTTATCCAAATGGATGGGAATATTCTTTTAGCTGAATAAGCTATGTA    | 23156 | A_95_P309148 | AJ299250     |
| 23826 | 281 | 26 | 246  | TTCTTCGGAGTTGTCGGGTCTAGAAGTTTTGTGTATATATGTAGATATGATATGGGT    | 23160 | A_95_P156907 | EH614997     |
| 23829 | 281 | 29 | 727  | CTTGTGCAAGATTATGTACTCTTATCAAATACACTACAGCCTAATTGATACCTCATGA   | 23165 | A_95_P013841 | TA15344_4097 |
| 23833 | 281 | 33 | 1077 | GGCACATAGCTAGCTGTACTTATCAGGTCTTTTGTGTTGCTTATATAATAGCTTTGTTAC | 23173 | A_95_P214067 | TA20181_4097 |
| 23835 | 281 | 35 | 821  | ATTGGGTTCTGAAGAAGAAAGAACAGATGAGGAAAAAAGGGAACGCAGTTCCTCCA     | 23177 | A_95_P255014 | EB678811     |

|       |     |    |      |                                                              |       |                           |
|-------|-----|----|------|--------------------------------------------------------------|-------|---------------------------|
| 23837 | 281 | 37 | 430  | TACAAAAGCTGGCCTTTCCACACTGCACTTACTCTGTCTTGGATATAAAATCTGGGTG   | 23180 | A_95_P065250 BP136280     |
| 23842 | 281 | 42 | 700  | TTGCCTATTTAGTACTTGTTTTATGTTTTGCTACTTTTATGTACTGCCGGGGGTAGAAA  | 23189 | A_95_P239469 EH619964     |
| 23848 | 281 | 48 | 808  | CCAGACGAAGAATGAAGTGGATGCCACTGCATATACTTACTATATACATGTTATAATI   | 23200 | A_95_P207642 EB680934     |
| 23849 | 281 | 49 | 981  | TACCAACTCGGAGGTTTTATTACTGTCATTGTTATAGAGAATGATGTTAATGGTTGT    | 23202 | A_95_P187077 TA14267_4097 |
| 23850 | 281 | 50 | 378  | AATTACCTAACTCAAAGGACTCTGAATTAGTTTCGACCCTGGAAGAGTCAAACCTT     | 23204 | A_95_P062210 BP135458     |
| 23851 | 281 | 51 | 853  | TTATTCTTTATGATGTTACGGAAGTAGCTCGCTCAATTCTGAAGGACTGGCGTTGTT    | 23206 | A_95_P311363 FG155210     |
| 23858 | 281 | 58 | 580  | TTGTCCACATTGTCATGCTAGTCCCTATAAGCCAATCATGAATCCTTCTAATAAATCTTA | 23220 | A_95_P133947 EB435655     |
| 23862 | 281 | 62 | 882  | AGTTTAGTGAGGTTTTTGTTCATCAGCTCATTACACAATTGAATTTGACTTGGAGC/    | 23228 | A_95_P230909 EB682574     |
| 23868 | 281 | 68 | 1083 | GTGGGAGAATGTATCTGATCGGGGCATATTTCTATAGAAGGACCTTCGCTTTTCATT    | 23240 | A_95_P007811 TA12835_4097 |
| 23873 | 281 | 73 | 728  | GGTAAGACAGAACTGGATTTGATAGCAGAAGTGATTTATATGAATGTCACCTTTTAC    | 23249 | A_95_P014866 TA12646_4097 |
| 23876 | 281 | 76 | 284  | CCTTGCCCGCAAAGGGCTAAATGGAATCTTAACTCCTCTTGAAGGTTAAATATAC      | 23255 | A_95_P079005 BP527662     |
| 23877 | 281 | 77 | 679  | AAACTCTCACATAGTTTGTTCACAGTGCTTATATTCAGCCCAATCTCAGTTATTTAGC   | 23257 | A_95_P017041 TA16614_4097 |
| 23886 | 282 | 1  | 229  | GGGATTTTGTTGATTCAAGCACCGTCTTTATGGATAGTTGTGCATTTACCTTCCTTG    | 23112 | A_95_P103182 CV016385     |
| 23887 | 282 | 2  | 172  | TATGGCTGACTCGTCGGGTAATCACACGAAACAGTAAAAAATGTAAAACGGAGG       | 23114 | A_95_P132277 EB432721     |
| 23898 | 282 | 13 | 971  | CTATATCAAGTTGAAGTGGGAAAGAGCATGCTACTTTTTCGTGAAATATGAAAAAG     | 23135 | A_95_P011356 TA18829_4097 |
| 23903 | 282 | 18 | 298  | GCTAGTGTTCTCTACACATCTGTTGACCTCTTCTCAGTCATTTCTGTCTCTACATTTCA  | 23145 | A_95_P074055 BP526374     |
| 23904 | 282 | 19 | 308  | GTTTCTGCTTGAGGCCCTTTGAGAGGGTTATCTGAGGGAGGGTACTTTTAATAACAT    | 23147 | A_95_P107257 CV018282     |
| 23913 | 282 | 28 | 1075 | GAGAAGTGAATGACACTTAAGGTTTTGGCTAAGCTTTCTTTTGATTTCTTTGGATC     | 23164 | A_95_P014181 TA18990_4097 |
| 23915 | 282 | 30 | 851  | ACCTTTTGGCCTGTGCAGATTAATGTATCTGTTTCTCCCATCGTTGCCTGAAAATTT    | 23168 | A_95_P011946 DV157804     |
| 23919 | 282 | 34 | 823  | CATGTTGAGGGAGTGTAATATTCTGTTCCGGATATAAAAAGAACATAGTGACTTAAGT   | 23176 | A_95_P204712 TA18122_4097 |
| 23922 | 282 | 37 | 740  | ATTGATTTAGCCAAGAAAGCTGTCTCTCATATACTATTTAGTCAATGTAGCTGTCTCTC  | 23181 | A_95_P226669 EB678380     |
| 23923 | 282 | 38 | 442  | CTCGTGAACCTACTCCATAAATAAAGCGATTTCTGTTTTTCGTAGCAAAGTGGTTATGT  | 23182 | A_95_P021316 TA13919_4097 |
| 23926 | 282 | 41 | 218  | AATTCAGATAATGCGTGATGCTGATACAGATCCACATGCTGCAACCAGACCTGTCGA    | 23188 | A_95_P153167 EB683477     |
| 23927 | 282 | 42 | 799  | TTCCTGGTCAGGGTACAACAATCAACGTCAGTGATAACTCTGCAAATGTGAAGAGAG    | 23190 | A_95_P117427 L29271       |
| 23932 | 282 | 47 | 794  | GATCCTAAATGTTGTAATGCATACTTCATACCTTCACGGGTTTAAAGTATCTGATGGT   | 23199 | A_95_P014036 DV160403     |
| 23934 | 282 | 49 | 733  | TGTGCTCTGTCACCTCAACTGATTTGTATCACCATTGAATACTTAGCTTCATTTGCCTT  | 23203 | A_95_P272416 EB449916     |
| 23935 | 282 | 50 | 739  | GTTATCCGCTACTATATTCAATGCACATGTTACTGCCATTATTTGAATCTTAGCTTGTC  | 23205 | A_95_P207077 EB679684     |
| 23937 | 282 | 52 | 498  | TAGCTTCCTTGATTTGTACGGCTTTTGTGTGTAATGGACAGCTAATCATCTATGAA/    | 23209 | A_95_P129912 EB429850     |
| 23938 | 282 | 53 | 606  | CCTTCTCAATCCTGCAGTCTGATATCCAGATGGTATATCTCTGGATACTGCATATGC    | 23211 | A_95_P030071 FG170078     |
| 23942 | 282 | 57 | 864  | CTACAATAGAATGCTATATATCCTATTTGCTATGTAATAATGGTGGGAGGTGGAAAAAT  | 23219 | A_95_P120462 DW000389     |
| 23943 | 282 | 58 | 659  | GGATCTGATGTACTTCAACAAAGGCAGGGTAACCGGAAAAACATAAAAGCTACTGA/    | 23221 | A_95_P123737 DW003603     |
| 23948 | 282 | 63 | 757  | AAAGCTTCAGAGGAAGTAGATGCTGTGCGATGGTGACACAGCGTCAATATACAATCTT   | 23231 | A_95_P271856 FG134195     |
| 23949 | 282 | 64 | 210  | CCCTGTGTTGGATATCCTCCAGAATTTCAATTTATTTTCGTCTTTTAAATATTGGAG    | 23233 | A_95_P008296 BP531102     |
| 23951 | 282 | 66 | 805  | ACTACTACGGATGATCCTGTTATCCGGCGTTGGCTAATGAAGATAAAGCTACTGTTTT   | 23237 | A_95_P197727 TA16626_4097 |

|       |     |    |      |                                                              |       |                           |
|-------|-----|----|------|--------------------------------------------------------------|-------|---------------------------|
| 23952 | 282 | 67 | 472  | TAGTGGACTTCATATCTTCTTGATCTTTTATTTGGTTTCTTAGTTTTGGCCTAGGCTG/  | 23239 | A_95_P091588 BP531424     |
| 23953 | 282 | 68 | 611  | TATTTCACTATGGGTCAATCTCTTTGATTGCGGAACCGTGTAGGTCAGCTCATCTTGC/  | 23241 | A_95_P127102 FG201107     |
| 23956 | 282 | 71 | 753  | AATTTTCATGTGTGCGTAATCAATTGCTTTGCGGAGCTGCTGCTCTGCAATACAAC     | 23246 | A_95_P135922 EB439469     |
| 23959 | 282 | 74 | 298  | ATCCAAATTGTGGATCCCAGTTCGGTTCCCTCCAACATTCCTTACGGTTATAAACGGT   | 23252 | A_95_P106792 CV018062     |
| 23961 | 282 | 76 | 493  | AGGTGTCTTCTGTATGATGCCTACTTGTTTAACTTAGGTACATCGACTGGTTTAAAGT/  | 23256 | A_95_P188222 TA14522_4097 |
| 23967 | 282 | 82 | 1734 | GCAAAACTAATCATTTAGATTTTGTCTGCAAAATTTCTTCGTGTGCTCGTATTGCTGGA/ | 23267 | A_95_P206082 TA18429_4097 |
| 23968 | 282 | 83 | 519  | CTGCTTGAGCGAAGGTGTCCCTGGTCTAGAAATATAAATATGTAAATCGATAAATTT/   | 23269 | A_95_P293668 EB436838     |
| 23969 | 282 | 84 | 666  | ACTGATGTTTTAGCAAGTCGCTTATTTCTCTGTTCTGTTGGGGCTCTGACCTTGAATT   | 23271 | A_95_P302913 FG635924     |
| 23970 | 282 | 85 | 606  | TCTCTAGATTTAAAGCAAATAAATTTGAAGCGTAGTCCGTGAAATGATGTTCTGGCTCA  | 23273 | A_95_P249722 DW005127     |
| 23971 | 283 | 1  | 781  | TCACAAGCGGATTCAAATGTGTTTGATGAAGATGGTGTATTGGATATCTCATAAGCA    | 23274 | A_95_P292513 EB427587     |
| 23973 | 283 | 3  | 441  | GATCTTCATTTTGCCTTCATCCTGTACTGATTTATGTCAAGCTTGAATAAAATGTGGC   | 23278 | A_95_P276353 AM779996     |
| 23978 | 283 | 8  | 616  | ATGGTAAACGTCAGTTTAAAGGGGCTAATCGATGTTTACTCTAAGACATTGTCAAGTG/  | 23288 | A_95_P145112 FG144055     |
| 23982 | 283 | 12 | 1538 | GTCGTCTGTCTTTCATGCATTTTCATGTGTTGTCTTCTTGATTGTGGTCATAGCTTTGAG | 23296 | A_95_P192032 TA15365_4097 |
| 23990 | 283 | 20 | 0    | TACCATTGACCAAATCAAAGAAGCAGCAGCAGGAGTTAAGGTGTAAAGGTTCCACA/    | 23312 | A_95_P008986 A_95_P008986 |
| 23992 | 283 | 22 | 472  | CCTGCCTGCTTCACATCCCATGAAATGTTAAGAGGTCAATTTTTGTATTTATAGCATA/  | 23316 | A_95_P212742 TA19900_4097 |
| 23993 | 283 | 23 | 1095 | TGTAAAACATGAAACTCCAAGTGTGTCATTATTTGTTGCTATAGGATTGCTCATCCAG   | 23318 | A_95_P212217 TA19786_4097 |
| 23994 | 283 | 24 | 649  | TATTGGTGTGGTGGCATTGATTACAGTAATCACATAGCTTCTTTTCTCTCGTGGC/     | 23320 | A_95_P054236 BP133383     |
| 23995 | 283 | 25 | 465  | ACCTGCAATGCATCTATAGTGTCACTTTCCTATTAAGTTTGAACCATTCGCATATCAT   | 23322 | A_95_P279463 AM835066     |
| 23996 | 283 | 26 | 628  | CGAGTAGACAAATGTATCCAACAGTCTTGTGTTTGCAGATGTGATAATATCCAATTC    | 23324 | A_95_P025946 BP133301     |
| 23997 | 283 | 27 | 377  | ATGTTAGCTTCTGAATTTAACCGCTGTTGGTGGATCTAAAGACTAGTACCTTTAATCTC  | 23326 | A_95_P114087 DW003761     |
| 24000 | 283 | 30 | 900  | CACTGAGCTATCTCTTGAGATTAATGCTGTAGTAGTTTGAATCACAGTCTAGTTGTA    | 23332 | A_95_P008236 EB677852     |
| 24001 | 283 | 31 | 808  | GATGTCCCTCTTGTTGTAATGCTCCTTAGATGTATTAGTGGATTCACATTTCTTTGTAA  | 23334 | A_95_P241555 EB678009     |
| 24002 | 283 | 32 | 750  | AAATTCACCTCAGATCTCACATTTACCTGTGAAAATCCGGCCCTTGCCAGAAGCTAT/   | 23336 | A_95_P293943 EB438793     |
| 24013 | 283 | 43 | 1264 | CGGTGAAACGCATCTCCAATCTAAAGGCGATTAAACTCTCTGTTGAGTTAAACAGAI    | 23358 | A_95_P023386 TA15188_4097 |
| 24015 | 283 | 45 | 952  | TCACAGAGCACTTTGAGGTCCTGGTTGTAGTAAATTTATAGCTTTCTTTGTTTCATAAC  | 23362 | A_95_P184597 TA13729_4097 |
| 24016 | 283 | 46 | 516  | TTCAGTTTGCACACCCATGTGTATTCCCTTTTCATATATTCAACTCTGCTCAATTGAC   | 23364 | A_95_P190517 TA15033_4097 |
| 24019 | 283 | 49 | 836  | GGCAATATCGTTGGGGATTGTAATATCTTTATTGGTCATTCTTTGAGATTTAACGTG    | 23370 | A_95_P147417 DV999323     |
| 24021 | 283 | 51 | 872  | AGAAAGGGCAGGTTTCACTGGATCTAATTTTGATTGGTTGCTCCTCCATCAGGCAAAI   | 23374 | A_95_P245762 DV999286     |
| 24023 | 283 | 53 | 579  | GAAAGTGATGATTCATTGGCAAGTACGGAGGATCTTCTTCGGATTCTGATTCTGATC    | 23378 | A_95_P137302 EB441025     |
| 24031 | 283 | 61 | 867  | GACTGTTTTATATAGCTTTTTCTAATGGGGACTTTAGGTTTGATCTCTGCTCTCTC     | 23394 | A_95_P248092 DW001749     |
| 24032 | 283 | 62 | 375  | ACTGAAAATGGTAGTACCAAGGATGACCTCAGGCTTCCAACAGATGAGAATCTTCTC    | 23396 | A_95_P115718 EH664552     |
| 24034 | 283 | 64 | 352  | TCTTAAGAAGAAAAGTTACCTTGCTGCTGTTTCTCAAGACGAGGAGTCACAGCTACG/   | 23400 | A_95_P195412 EB434170     |
| 24036 | 283 | 66 | 788  | CGCAAGATCTCTCATGTACTTCAAACAGATTGTGCTGTTTTCAGTTGCGGCTTCTTGA   | 23404 | A_95_P240149 AJ966361     |
| 24044 | 283 | 74 | 291  | AAGTAGGGGCAGAGTTTGGAGATTTCTTTATCTTGCATATTTAAATCCACCTTAAC     | 23419 | A_95_P105202 CV017354     |

|       |     |    |      |                                                              |       |                           |
|-------|-----|----|------|--------------------------------------------------------------|-------|---------------------------|
| 24047 | 283 | 77 | 145  | ACAAACTCGGTGGTCTTTTGAGGCAGAGCATTTCTGAGAAATGCACGTAAGTGGCAA    | 23425 | A_95_P104257 CV016912     |
| 24054 | 283 | 84 | 774  | GAGTTCAAGTATATCATTGTAGAATACATATGTACTAACTGTAGTACCCACTTTTCGG   | 23439 | A_95_P203617 TA17891_4097 |
| 24055 | 283 | 85 | 0    | AACTATCTGACTGACCAATATGCATATTTGCAAGACTGATCGACCTTCTTTCTTTCTT   | 23441 | A_95_P264136 A_95_P264136 |
| 24059 | 284 | 4  | 823  | GGAAGTGCATTTGCATATTAGCTTGCATCATGCTTTCTTTTGTAAACTAATTCTGC     | 23281 | A_95_P010456 TA13522_4097 |
| 24064 | 284 | 9  | 247  | TTTTGTCCATTGAACGTGTTCTGTGTAAAGTTGCAGATAGTTATTTATTGCCGAAGC    | 23291 | A_95_P060170 BP134928     |
| 24066 | 284 | 11 | 429  | TAATATGTCAAGGAGAAAAAGACGCTCTAGCCTGTTTGATATTGTTGCTGATGAGTC    | 23295 | A_95_P156212 FG156321     |
| 24071 | 284 | 16 | 611  | CCGTTCATAGTGGAGTGACATTTTTTGATGTCCATGTAAGCATAGTAGAATATGATTC   | 23305 | A_95_P264291 FG640840     |
| 24072 | 284 | 17 | 842  | GGGTGTTTTACATATACACTTCTACTCTATGAATGTAGTAATTTGTGTGCCTTTCTGT   | 23307 | A_95_P014236 TA12103_4097 |
| 24074 | 284 | 19 | 774  | TGCCGAAGACCGACGAAATTCAGTTTAAAGGAGGAGTGATTCTTAGTGTTAGATTGCA   | 23311 | A_95_P163712 EH622807     |
| 24075 | 284 | 20 | 97   | ATGGCAGTGTCAAAGAACTCATTGCCTGAGATCAATTACTTATCTGAGCCTCATTGGT   | 23313 | A_95_P136902 EB440602     |
| 24089 | 284 | 34 | 826  | TAAGGTGATGGAGTAGGGCTATGTTAGGATGAATTAAGAGGGCTGCATGGCCAGTT     | 23341 | A_95_P253319 EB424967     |
| 24091 | 284 | 36 | 170  | ATGTCTTCTCTGAGGTTTCCGACGACACATATCTGGAAAGTTACATAAGCACCATT     | 23345 | A_95_P004191 X72212       |
| 24102 | 284 | 47 | 670  | TAAGTAACTCGTAGCCAGCCACATCAGTTGAGTATAACGACAGGGTGACTAGTA       | 23367 | A_95_P222042 EB433061     |
| 24104 | 284 | 49 | 435  | ACATGATGAGTGGAGAAATAACGTTTCGTTAACGGAGTTCTAACGCACGTGTAAAG/    | 23371 | A_95_P104057 CV016825     |
| 24106 | 284 | 51 | 239  | GACGAATCAGATTTGAAATTGGACTTATCCTCCTTGATTTCGAATGCCAAATCCCAGG   | 23375 | A_95_P053251 AM840678     |
| 24111 | 284 | 56 | 773  | TAGTCTGCATCCATCTTACAGATCCTTTCTCAACAAACATGGTGGGAAATCTCAGGTT   | 23385 | A_95_P127267 EB426796     |
| 24115 | 284 | 60 | 829  | TATTTCTGATGTAATCATGGATGGGGTGATTTGAAACCGCTGGGCTATGATCTATTC    | 23393 | A_95_P289043 FG162032     |
| 24116 | 284 | 61 | 2894 | GTAATCAGTAACCACTGTCAAAGCTAATCTTTAGCAATGAATTGCACGCCATCTTTT    | 23395 | A_95_P217392 AF194945     |
| 24118 | 284 | 63 | 204  | CTTATGCTAAAGCTTCCGATCTTCTCCCATCAGTTGTAATTGTTGACTAATTGAAATA   | 23399 | A_95_P110612 CV019809     |
| 24121 | 284 | 66 | 785  | GCGGTTGCAGGTTTGTGAAGTAATAATCATTCTTTTCGTTTTCCCTTATCATTATGTTTT | 23405 | A_95_P285258 EB679218     |
| 24126 | 284 | 71 | 1217 | CTGTTGAATTTTCATCTTTGATGGCTTTAAGATAGCGTGATCGATTTTGCATTGTCAA   | 23414 | A_95_P018461 TA11803_4097 |
| 24128 | 284 | 73 | 1046 | CACTACCCAAGAAGTTGTTGATGCAATTATAGCTGCTCTAGACTAATCAGCACTATAC   | 23418 | A_95_P150597 Y14432       |
| 24129 | 284 | 74 | 447  | AGGAATGTTCCACTGTACAAGCACATTGCTGACCTGGCTGGTAAACAAGAAGTTGGT    | 23420 | A_95_P162817 EH666157     |
| 24130 | 284 | 75 | 831  | GCAGTTTCATCCTAGAGACTCTAAGCCCGTGATGAATCTATGGATGTTTATAGAACA/   | 23422 | A_95_P287138 FG148784     |
| 24139 | 284 | 84 | 790  | GTATCGGAAATTTGCTTGTATACGATCTATGATTTTCTGGTAGCTCGAATCTTTTG     | 23440 | A_95_P194272 EH621684     |
| 24143 | 285 | 3  | 497  | TGTGTTTCATCAATGGCCACTCAAACACAGTAGTGCAGATCATTGGATTGAGTGTGAA   | 23447 | A_95_P073265 BP526174     |
| 24144 | 285 | 4  | 354  | TGACATTAACCTCAACTTTAACCAGGAGGACCTGTACAAGCTGATACCCATGGTTTTCT  | 23449 | A_95_P156107 EG650414     |
| 24145 | 285 | 5  | 891  | ACTGCTTTGAATTTTCAGCAGTTTGTCTACATGTTGCAGTGTACATGTTACAGTGGAA   | 23451 | A_95_P011321 DV999505     |
| 24147 | 285 | 7  | 369  | TTAACCTCTGTATGGTCTTTTGAATTTTTAGTGATCCTAATCTTATCCAGAAACGGA    | 23455 | A_95_P059840 BP535201     |
| 24149 | 285 | 9  | 752  | GAAGGGATTGTTCTTCCATCTCCTTTGTAATTCAGTGTCTTCTTTATTGACTTGAT     | 23459 | A_95_P117777 DV160733     |
| 24153 | 285 | 13 | 578  | GGTGTGAAAAGTTTACGCGTCTTTCTTCTCTCACCATAGTACTCTTTAAGTTCTGTA    | 23466 | A_95_P263346 FG635797     |
| 24154 | 285 | 14 | 72   | CATGTCTGGATCTTGTGATCCCTGACTGAACGAAACACAGAACATAAAACAAAACAAA   | 23468 | A_95_P103147 CV016363     |
| 24155 | 285 | 15 | 835  | GTGCCCTCCACATTGTATTTTGGCAAGTAACACATCCACGATCGACCTCAATGTTATT   | 23470 | A_95_P232389 EB428507     |
| 24158 | 285 | 18 | 498  | TGGACGGAATTCGCCAACAAAGAACAAGCGAACTTATTATCATCAAAGGCATCC       | 23476 | A_95_P275398 AM818672     |

|       |     |    |      |                                                              |       |                           |
|-------|-----|----|------|--------------------------------------------------------------|-------|---------------------------|
| 24159 | 285 | 19 | 651  | TTATCCTAAAGTAGGTGATCACAGTATTTCCACCCTCCAGGCGTATTTAGCTTACAT    | 23478 | A_95_P060445 BP134999     |
| 24163 | 285 | 23 | 26   | GGAAGGGTGGTTTACGCCTATTGTCATATGGATCACTGTATTAACATGACGGTTGG     | 23486 | A_95_P015831 EH663872     |
| 24165 | 285 | 25 | 581  | TATTTTTCTCAATGCCGCGATCAAAACATAGCCAAGAAAGGAAAGCAATCATCACAG    | 23490 | A_95_P053886 BP133302     |
| 24166 | 285 | 26 | 466  | TGAGAACAAGGGGTTTGATATCCCAATAGTTACTTCAGTTTTAGGAGATAACATTCTC   | 23492 | A_95_P132777 EB433494     |
| 24167 | 285 | 27 | 866  | ACCTGCTAAAAAGTTATGGTTGTAAGTGCCGCTTTAGATTAATTGGAACCTGGAAG     | 23494 | A_95_P179487 TA12519_4097 |
| 24170 | 285 | 30 | 759  | ACTTGAAGATTAAGGTTTTAGGCTGCAGTTGTCAGCTGTTATTTTTGTCCACATCTTT   | 23500 | A_95_P192127 TA15386_4097 |
| 24172 | 285 | 32 | 466  | TCTCAGATTTTGTACGTGGAAGACTCGACTTAAGCAAGAGTTACATGAATTGGAAT     | 23504 | A_95_P079240 BP527715     |
| 24175 | 285 | 35 | 491  | TTTGTACTCTCGGCTTGAAGCGAAATGAAATATTAATCAGGCTTTGTTCTGTGA       | 23509 | A_95_P140157 FG623196     |
| 24181 | 285 | 41 | 605  | TTGTAATCTGAAAGTTGCTCAGTAGTGAAGTTGAAATCCTACAAGGGTAGGTCGTGG    | 23521 | A_95_P153152 EB683464     |
| 24184 | 285 | 44 | 407  | CCAGATGTGGTTCTCAGCAGGCGGCATTGATCAGTGATAGAAGTACTCTTTTCA       | 23527 | A_95_P110832 CV019930     |
| 24185 | 285 | 45 | 367  | GAGTAGATGGTGCTTGTCTCAGAGAGGTGCTTTGGGAAGAAAAAGTAAAAGCGA       | 23529 | A_95_P212632 TA19877_4097 |
| 24186 | 285 | 46 | 549  | ATGGAGCTTAGTTCGTTCCAAGTTTCAAGTTTATTCTATTTTATGTTGAGCACCTGT    | 23531 | A_95_P200742 TA17272_4097 |
| 24190 | 285 | 50 | 381  | AGTACCTTTGACAAATAAACGGATAACGACTCTGTGTTGCTCTCGATAATGCTCGTGC   | 23539 | A_95_P102487 FG644307     |
| 24198 | 285 | 58 | 492  | GGGATCTCTGGAGACCTTTCTACTTCATTGTCTTCCCTTGGAGACCTTTCTACTTCAT   | 23555 | A_95_P073060 BP526114     |
| 24199 | 285 | 59 | 1085 | AAGACATCTTGGTAATTTTGAAGGCCTGTACTGCTCATTTACTGTCTTGGTATTTTCG   | 23557 | A_95_P189192 TA14738_4097 |
| 24206 | 285 | 66 | 1025 | ATGTGCCACTTGTTTTGCAATCGACTTGTGCAAGAGAAGGCCTACCATGATTCTGATT   | 23571 | A_95_P007771 TA13610_4097 |
| 24207 | 285 | 67 | 860  | AGCTTCATGAACTATCCTTAGCGAGCTCTGCCATATGAATAAAAAGGAAAGTAATA     | 23573 | A_95_P137652 EB441385     |
| 24210 | 285 | 70 | 624  | CTGGTATATACTGTCTAGGTCGTCAAAGTACTGGGAATTATGCTCTGCACTCAAC      | 23579 | A_95_P306763 FG636154     |
| 24217 | 285 | 77 | 789  | ATGGCTGCACTGTAATTTGGCTAGCTGGAATTTATGGTTTTGCCCTTCATTTTTCTCTA  | 23592 | A_95_P180942 EB438484     |
| 24224 | 285 | 84 | 382  | TTTCAAGGGTTTACATGATCTGCATGCTGCGAGGTTTCGATCCCAACTGTTCCACAA    | 23606 | A_95_P156932 EB680094     |
| 24225 | 285 | 85 | 641  | GCTAGTAATTTGTCTATCCAGGTCTTCACGTTTTATATCAACAGTAGTTTGGTGTTTTA  | 23608 | A_95_P211307 TA19581_4097 |
| 24230 | 286 | 5  | 447  | TATTGATGAAAATTTTAGTTGGTGGTTGTACTGCAACGCTTTGGACAGTGCTTTATCC   | 23452 | A_95_P025731 TA19830_4097 |
| 24234 | 286 | 9  | 672  | GCAAAGAGTGGTTGCAGATCAGCCAATTGAACTAGCCCCTATGTTTTCTGAGTTCCTA   | 23460 | A_95_P041811 BP130189     |
| 24235 | 286 | 10 | 694  | CTAGAGATCGGTTATCTACTTAAGATTGCTCATTTGAAGCATCAACGTCTGTTATCTC   | 23461 | A_95_P262696 FG195144     |
| 24237 | 286 | 12 | 1553 | TAACCTCCATGGTGAGATTGTTGAGGATTTCTGAGACTGAGGGTTGTCTATAATTTT    | 23465 | A_95_P190377 TA15002_4097 |
| 24240 | 286 | 15 | 381  | ATGGCGTTTCGACAGCCGATTTCTCCTTCTATCTCCACTTATTATTCCGCATTTTTGGC  | 23471 | A_95_P090698 BP531062     |
| 24242 | 286 | 17 | 757  | TATTGAAACAGTGGAAGCTGTATAAGAGGAAAACAAGATGAAGCATTGACTGAAC      | 23475 | A_95_P202852 TA17729_4097 |
| 24243 | 286 | 18 | 881  | AAATTTCTTGGACAGTCACTGTGGTATGATGCTATTCTACTTTTGGCTGGAGCCAAAT   | 23477 | A_95_P253429 FG158652     |
| 24247 | 286 | 22 | 674  | CAGATGTCATGTATATAGATACTTGTATGGCCTTACCGGCCTGTGTTTTGAGTGTACA   | 23485 | A_95_P152737 EB683091     |
| 24249 | 286 | 24 | 762  | ATATATATCAAAGCTTTTCGATCTTGGTCGTGTTTTTCATCCACTTCTGGTCTGTTAACT | 23489 | A_95_P127537 EB427062     |
| 24250 | 286 | 25 | 459  | TCTACATGCATTGTACACAGCTTCCATTCTACATATATCAAAGCAATAAAGTCCTTC    | 23491 | A_95_P122367 DW002356     |
| 24256 | 286 | 31 | 1003 | TTGTAAGTCCACTGCTCTACATTGCCATGAACTTTAGTATTTCAACCTTACATGTAAG   | 23503 | A_95_P012196 TA16236_4097 |
| 24257 | 286 | 32 | 1682 | ATTTACTCTGTTATTTATCACATTGAGGACCGGAGAAAGAGAGCCATGGTTTTATT     | 23505 | A_95_P014731 TA14619_4097 |
| 24261 | 286 | 36 | 824  | AAATCAGGAAACTGCAGGAGAACAGCAAGATAAGGTGTTTGTGCCGTTTGTAGTCAGG   | 23512 | A_95_P216802 TA20783_4097 |

|       |     |    |      |                                                              |       |                           |
|-------|-----|----|------|--------------------------------------------------------------|-------|---------------------------|
| 24271 | 286 | 46 | 827  | AATTCGTCGAAGGCAATGCTAAACCAGTGAACATAGAAGTGGCTTAATTTTACAAAC    | 23532 | A_95_P222372 EB677671     |
| 24273 | 286 | 48 | 435  | GATCGAGGTCCATTGCTACACCTTGTTCTTATTTAATTTTGTAGTATTCTTCTTGGTGT, | 23536 | A_95_P142717 FG643597     |
| 24274 | 286 | 49 | 803  | CATTCCAAAGACCTCTCTTTTGGATAGAGCATTCCGCGATTTTAAACATGTTGATTATT  | 23538 | A_95_P226359 DV999856     |
| 24278 | 286 | 53 | 685  | ATGTTATTCATAGCAATGGGTACAGGGAAAATGCATTGTCGCTCTGAAGCAAGGTCA    | 23546 | A_95_P025381 DV158470     |
| 24291 | 286 | 66 | 201  | TCACTCAAGTGAATTGGTTTTCGAGAGCATTCCGCCAGTTTTTGGCGGCTTTCACTTTC/ | 23572 | A_95_P139537 EB443313     |
| 24293 | 286 | 68 | 312  | GAACGGAATGAAGAATGAGCAAGCAATATCGGAAGTTTTGTGCTGGTCAAGAGATC     | 23576 | A_95_P167941 EH664311     |
| 24297 | 286 | 72 | 959  | ATTTTTCGGAAATCAGTGTAGGGAAAACGTTTCCCTACTAAAGTGGGAGGTCAAGTGT.  | 23584 | A_95_P007871 TA13446_4097 |
| 24300 | 286 | 75 | 847  | TTGCTTGCTTATGATGCTTTTCTATCCAAGATACCTATTCCCTAGTGGCAATGTGTATGC | 23589 | A_95_P229899 DV159511     |
| 24301 | 286 | 76 | 564  | TGCTTTTGGGTCAATACTCCACAGGCAAAACCACATTCACCTAAACATTTACTCAAAA/  | 23591 | A_95_P056376 BP133939     |
| 24304 | 286 | 79 | 502  | GCGCCAGCTGCTCAAGGATCTTAACTACTTAATCCCCTGTTTTAATCTTTCTTACT     | 23597 | A_95_P068070 BP137042     |
| 24305 | 286 | 80 | 841  | ACATACATGTTCTCAGCTGGTGATGATAAGCAAGTTAAGTGTGGGACCTGGAACAA     | 23599 | A_95_P205952 TA18402_4097 |
| 24312 | 287 | 2  | 766  | TCTGGTTATGCTATACAACCTTGAGAGGAACTGGGTTTTATTTTAGTATTCAGGCGTT   | 23612 | A_95_P149167 EB678864     |
| 24315 | 287 | 5  | 758  | ATTATAGGTGGTATTGTAAGCAACACATTGAGACCGCCTGTGCCAAGCTTCTGTGAC/   | 23617 | A_95_P287873 EB450940     |
| 24320 | 287 | 10 | 374  | CCAAGCGTGTGTCGTATATGTAGCATTGATAGTTTTGATACGTCAAATTTGTTCTTG    | 23627 | A_95_P308748 FG643512     |
| 24321 | 287 | 11 | 2055 | CATATCCCATTAATGCTGTTAGCCTACCCTCTGAAATGATATGCTAGCAAAATATTI    | 23629 | A_95_P200957 TA17322_4097 |
| 24328 | 287 | 18 | 855  | GTGGTAGAAAATGAGAAAGAGATATGGACTGAGCATAGTTATCACAAGCATGGCTG     | 23643 | A_95_P284718 FG169521     |
| 24330 | 287 | 20 | 1209 | CGTATGTATTTCTATTTCTGCATGGAACCTCTGCGTAATCCAATTCGTGCAGTGAATTCI | 23647 | A_95_P184042 TA13598_4097 |
| 24331 | 287 | 21 | 872  | AAGTGAATCAGTTAGATTCTAATCTTTCATATGCAACTGTGTCTTGTCTCGTCTCCTCT. | 23649 | A_95_P204687 DV160259     |
| 24332 | 287 | 22 | 872  | TGTCACCTCAACATTTTCATATATTCAACTCTAGTAGTACTTTCGTGTTTGTGATCATG  | 23651 | A_95_P242767 FG160334     |
| 24333 | 287 | 23 | 579  | CTTTGCTGAATTTGCATGTGGTGTAGTTTCGTCTGTTAAGATGTACAATTATCTGAA/   | 23653 | A_95_P019466 DW003772     |
| 24335 | 287 | 25 | 598  | CTTTCAGCTTGACTGCCCTTCTGTTTTATAATGTGTCCCTAAATAATATAATCTAT/    | 23657 | A_95_P198757 TA16849_4097 |
| 24336 | 287 | 26 | 1013 | CGAAGAAGCCCTGGTCGGTTAAAGAAGAGAACTACCATGAAGAAGATAGTGAAGA/     | 23659 | A_95_P135582 AB017694     |
| 24338 | 287 | 28 | 868  | AATTATTGCTGCTTTATGGCGAAATCTGGAGCGTTTTGGCGTGCTCTGAGCAACGAT/   | 23663 | A_95_P185847 TA14003_4097 |
| 24340 | 287 | 30 | 894  | TAAGAATGGTAACTAATGACGTTGGTATCCCGTGGTGGGGTAGCTACTCCTTATCAT/   | 23667 | A_95_P269486 EB424905     |
| 24343 | 287 | 33 | 1259 | TAAAACCTGGGTTTAGGTTGCTTATGTGCATATCTATCTTCCCCTCCCTTCTGCCTC/   | 23673 | A_95_P188377 TA14557_4097 |
| 24344 | 287 | 34 | 1227 | GTTCCAAGAAACGCGGTGTAGTCTGGTCTTTATGACATAATTTATTTTTATTTTTGGC   | 23675 | A_95_P027021 TA17581_4097 |
| 24345 | 287 | 35 | 791  | ATCTAGTGATTTCTTTCCCTTCTACTACCCTGCCATAAAGCAGCTGTATTTTTAATA/   | 23677 | A_95_P011881 EB426498     |
| 24347 | 287 | 37 | 319  | TCTTTGCTTATCTTCAATCGCATTTTGTACTAGACACGTTCAAAGTTGGAATGACGAA/  | 23681 | A_95_P095628 BP533269     |
| 24349 | 287 | 39 | 526  | CAAGGAGGGAACATCTGATTAGATGTTGTCTAATTTTGTCTTGGAGTTTCTATGTAC    | 23685 | A_95_P223022 TA22158_4097 |
| 24351 | 287 | 41 | 757  | CCTGAAACTCTTCATGTTTCCAACAAGAGGGCAGCTGTGAGCACCTATTTTTATTAT/   | 23689 | A_95_P302533 FG139104     |
| 24354 | 287 | 44 | 826  | AGTCGGCTTACTTAGCGGATGTTCAAGAAAAAGAAAAAGCTATCCATCTATAGCTGG    | 23695 | A_95_P270881 EB437031     |
| 24356 | 287 | 46 | 661  | TGTCTAACCTTGGGTTTTTACCAAGAAAAAGACTGCCTTCTTGTTCATATTCTCTAGC   | 23699 | A_95_P300773 FG637873     |
| 24366 | 287 | 56 | 503  | TTGTTCAATCCAGCAAGGTTAGCCTTTTTAACATTTTGAATGTCAAAGGCATTTGAT/   | 23718 | A_95_P054721 BP133516     |
| 24368 | 287 | 58 | 637  | TTTGGTAGAATTGGAGATGTTTTGTGTTCAAAGTTGGAATTTTGGGGATTTGATTG/    | 23722 | A_95_P221277 EB678015     |

|       |     |    |      |                                                             |       |                           |
|-------|-----|----|------|-------------------------------------------------------------|-------|---------------------------|
| 24371 | 287 | 61 | 774  | GGTTATATCTTTAGTGCTTGTGGTTGTGCTTGTGATGGACATTCTTTGGGTTATCTTTG | 23728 | A_95_P183177 TA13399_4097 |
| 24376 | 287 | 66 | 792  | TTGAGCGCTTGCTAGGGAAGAGGGTATTGCTGACGGAAAGGGATATTATACAGAT     | 23738 | A_95_P272106 EB447660     |
| 24379 | 287 | 69 | 782  | TAAAAAAGCATGAAGTGTTCGGGCCAGGTATTTATCTTCCACAACCTGCTGCATTACC  | 23743 | A_95_P120557 DW000523     |
| 24384 | 287 | 74 | 482  | ATACCTAAGAGCAAGTGGGATGAGGACAGCCAGAGTTCAACTTCATAAAGATTTGTC   | 23752 | A_95_P044491 BP130895     |
| 24387 | 287 | 77 | 582  | TGGTGCAGATGCTGGTTACCTGCATTACTTTGTGAAAAGTACATTATATGGTTATT    | 23758 | A_95_P307888 FG639922     |
| 24389 | 287 | 79 | 467  | TCTAATTGGTTTGGTGCATGTTCAATTTTCAACAATGAAGAGGCAGATAATGGCACATC | 23762 | A_95_P113747 CV021296     |
| 24393 | 287 | 83 | 646  | GCCGTTAATTTCTATATGGCACCTGAAATCACTGCCAATCTTTTGGAGAATAGTGG    | 23770 | A_95_P300598 FG638437     |
| 24394 | 287 | 84 | 217  | GCTCTTGTCAATTTCTCAGAGGACCCATCACTGGGTGATAGAATATCATATGTGTTGA  | 23772 | A_95_P157963 EH616022     |
| 24397 | 288 | 2  | 446  | ACTTATTTAGGTGAATTTCTTACGTAGGTATTACAGAGGAGCTGGGCAGGGATTGTG   | 23613 | A_95_P038586 BP129310     |
| 24400 | 288 | 5  | 0    | ATGGGGTAATTTCTGCTACTCTTATGTCCAATAATGTAGACAAAATGGTACAGCGG    | 23618 | A_95_P265491 A_95_P265491 |
| 24402 | 288 | 7  | 681  | GGATGTGGGTTACCATATCCCAAAAAGAAAGAGAAAAAAGTCTCCTACATGTAATTT   | 23622 | A_95_P267701 DV161349     |
| 24403 | 288 | 8  | 773  | CTTTCTTGTGCATGAGGAGTTCATGTAGATGGAATTGCGGAAAAGAAAATGACCATTT  | 23624 | A_95_P026216 TA22102_4097 |
| 24404 | 288 | 9  | 552  | TFACTCTGCTTAATGGGAAATTGTTTGTATGTGCAGCATAGAAGAAGTCTTGTTAAC   | 23626 | A_95_P048686 BP131980     |
| 24406 | 288 | 11 | 1408 | CAATCCCGGCTAATTTCTGTATACCTGTGATTACTGTAATAATGTACCATTCTATTTTT | 23630 | A_95_P178877 X75088       |
| 24410 | 288 | 15 | 686  | TTCCCTCTTCTAACATGCAGTCTGTAAGGAGGCCGAGGTCCAAGTTAGTTTATGG     | 23638 | A_95_P304168 FG635257     |
| 24416 | 288 | 21 | 520  | GGGTGTATACATTATATGTTGTAACCGATACAAAAGGAATAACATTTGGGGTTG      | 23650 | A_95_P151222 EB681453     |
| 24418 | 288 | 23 | 197  | CGCGAATCCAGCTCAAATAGAGTTCTATAGATTTGGATATAAATTTGTCTTAAGGCAC  | 23654 | A_95_P093793 BP532412     |
| 24422 | 288 | 27 | 400  | GGGGACAAAGTTGACTAGTGCTGACTATGGAGGCAGCTGATGTTTTATGAATGCAC    | 23662 | A_95_P032506 AB120521     |
| 24424 | 288 | 29 | 787  | GCTAATGGAGATGGGAAGCTTGGCACTCAAGGGCTTATTACTGTTATAGAGAGGATC   | 23666 | A_95_P126257 EB425523     |
| 24427 | 288 | 32 | 987  | ATGTGCAATGCTCTCAACAATTTTGTACGTTTATGGGTATGATGATACCAATTTTAC   | 23672 | A_95_P017766 TA16133_4097 |
| 24428 | 288 | 33 | 285  | CGAGTTCAATTAATCCATTACAGATCGCGTGAACCTATGTATACATATAGGTCAAAA   | 23674 | A_95_P148872 EB678400     |
| 24431 | 288 | 36 | 322  | GGAGTGAGCCATTTGAAGCTGGTGATTCTAGAACCAAAGAATATGTTAGTTTGCTA    | 23680 | A_95_P102947 TA12168_4097 |
| 24434 | 288 | 39 | 787  | CATCAGATGAATTCATCCATTTTGTGGTCATGTTCTTTTGTGCAATCTACCAAGTAT   | 23686 | A_95_P012476 TA13493_4097 |
| 24436 | 288 | 41 | 644  | ATAATTCACTCTTTGCTTTTGGCGCGGCAAGAATTGACATAATCAACCTGAGATGCGC  | 23690 | A_95_P183397 TA13448_4097 |
| 24437 | 288 | 42 | 782  | TGATGATGAGTACATAGGTGGTCCCAGACAACAAATCCGACAGCCACTGATCAACAA   | 23692 | A_95_P244537 DV999592     |
| 24438 | 288 | 43 | 746  | TATGAACCTACTATGGAACCTGAGAATTTGTGTGTGTGTTGGTGTATTACGACTT     | 23694 | A_95_P003786 TA11883_4097 |
| 24439 | 288 | 44 | 514  | TGTGTAGCCTAGTATTTTCAAGCTGAAAGATGAAAGTTAATGGTGAAAGAGCTGAATGT | 23696 | A_95_P262936 EB446476     |
| 24440 | 288 | 45 | 489  | CTGGTCTTACCCAACCATTGTATTTCTGTTTGTAAAGTTTACAGAAAGCAGGACAGAA  | 23698 | A_95_P115127 DQ437541     |
| 24448 | 288 | 53 | 430  | AGGTGGTTCCAAACAGTTGAGATTGCATCTCAACGCCTAGAAGTTTGCATGCCAAAA   | 23713 | A_95_P094608 BP532793     |
| 24454 | 288 | 59 | 141  | GCCCTCCACACGCGTGCTTCTTAGTTCTACTTCTATTTTTCATCAAGTAAATTGTATTC | 23725 | A_95_P100943 BQ842958     |
| 24457 | 288 | 62 | 281  | GCACTACTTTTCTGGTTACCTATGTTTATATCAGCCTGTTTTAAGACAACAATTCCTT  | 23731 | A_95_P309118 FG644729     |
| 24458 | 288 | 63 | 664  | GGACGATGAACTCCCAAGATGGTTTTGCCATCATTACTTTTAAATTCTGTACCATTGA  | 23733 | A_95_P182842 TA13316_4097 |
| 24465 | 288 | 70 | 577  | ATTTGATGCAACATTCCTTAAAGAGATGCCTCTATGGGTCTCTTTCCCACTTTACCTG  | 23746 | A_95_P068585 BP137164     |
| 24468 | 288 | 73 | 958  | GAAGTCAGGGTTAAAGTGAGGGATGTATAATGTTCTTTGAAACTAATGTATTAGCTA   | 23751 | A_95_P222522 TA22052_4097 |

|       |     |    |      |                                                              |       |                           |
|-------|-----|----|------|--------------------------------------------------------------|-------|---------------------------|
| 24469 | 288 | 74 | 289  | GCTGGTACTGTAATTTGATTTTGGGAACCTAATCTTGGTTGTTTTGAAATTATGGTCG   | 23753 | A_95_P025201 TA13570_4097 |
| 24470 | 288 | 75 | 313  | TTGGAAGGCTTTATGCCTGATCAAGGATATTTGATGTAGGATCTTCATTTTTACTAGT   | 23755 | A_95_P100448 TA12797_4097 |
| 24472 | 288 | 77 | 424  | CCTAAGCTTCCAGGCATTAATGACATTTTCTGGGATCACATTTCTTCTACAAGCCCTCT  | 23759 | A_95_P085860 BP529398     |
| 24474 | 288 | 79 | 787  | ATGCACTTAACCTGAAAGTGAAGTCAGTGAGGTACACTCGTGGTAGTTTCATCTTCCC   | 23763 | A_95_P013931 FG142227     |
| 24479 | 288 | 84 | 511  | CAAAATGCAGCCTTCTCGAACACGATCTATATAAAAATTTACAGTAGTTCTGGCTAAG   | 23773 | A_95_P184342 TA13673_4097 |
| 24481 | 289 | 1  | 756  | CTTTATAAAGCTGGAGAAAATAGATGGGGAACCTGATGAGAAGACTTTTATACGCATC   | 23776 | A_95_P128782 EB428512     |
| 24482 | 289 | 2  | 824  | CAAACGACAGATGATGATGCTATGTTCTGTATATTTGGCACTTCTATTATGGTTTAAT   | 23778 | A_95_P216532 TA20726_4097 |
| 24483 | 289 | 3  | 60   | GAAAATTTCTTGCATTTTCTGTCCTAACAACTTGGTTTGTCTCTCCTGTTAATGGC     | 23780 | A_95_P128042 FG624980     |
| 24484 | 289 | 4  | 926  | TTATCTTCATTGATGTACGGACATTTGATCATTGAATGGCCTGAAGTCCGTGTTCAA    | 23782 | A_95_P220617 TA21646_4097 |
| 24486 | 289 | 6  | 421  | GGAGCTGTTGATCTCATTGTTTACGAGAGTTTGTCTGTAGTTTCTTCAAATTTCA      | 23786 | A_95_P202392 AM817228     |
| 24494 | 289 | 14 | 802  | ATCATCTGCATACCGTTACTTCCAGTACATGCTAGTGGATCTGCATCAGTACTTGC     | 23802 | A_95_P253644 DV161442     |
| 24498 | 289 | 18 | 0    | ACGAAAAGCCATTAGCGCACAGCAATCTTCGTTGAAACAAAACAAACCTAGCAGCA     | 23810 | A_95_P266186 A_95_P266186 |
| 24500 | 289 | 20 | 542  | TAGATATGTCCCCTTACATTTGGCAAACAGCGTTACAGCGGGAAGAAAGAAACAGT     | 23814 | A_95_P149647 EB439032     |
| 24502 | 289 | 22 | 633  | CCACTTTGTTGGATGGTGAATGCAATGCCATCTGTTCTCACATTTTTTGTTCACAA     | 23818 | A_95_P058551 BP134501     |
| 24503 | 289 | 23 | 496  | GTGGAAGAGAAAGTGAACATTAAGTACATCCTTGTATGTGTTATCGAGCAATACA      | 23820 | A_95_P121887 DW001969     |
| 24507 | 289 | 27 | 1852 | GACTGTTGAATACACTGTAATAGTGGATGACGTTCTTAGCAATCCCTAAATAACACTT   | 23828 | A_95_P023706 AF426837     |
| 24509 | 289 | 29 | 105  | CCGTCCTTCATTGTAATTGTAATCTGAAGGAAAAGGATGGTCTTCTTAGAAATTCATT   | 23832 | A_95_P090128 BP530816     |
| 24511 | 289 | 31 | 545  | ATACAAAAACCCTGTCTCAGTACCTACACCATTGACTGTGGAAGATAGGTTCTCA      | 23836 | A_95_P081880 BP528375     |
| 24516 | 289 | 36 | 195  | TTATGGTGTGATTTTGGAGAAGTCCCTCTCAACGGAGTGACAACATGGAAACAAT      | 23846 | A_95_P133712 EB435348     |
| 24520 | 289 | 40 | 364  | CAAGGCACCAAGATGATCGATTTTGTGTAATGTTTGGTTGATGTGCTTATCCTCGAT    | 23854 | A_95_P122287 DW002306     |
| 24522 | 289 | 42 | 713  | AAGAGTATAAAATTCCTCAGGGTGGCCTATTCAATTTTGTGATATGCCACATTACCT    | 23858 | A_95_P269956 EB428227     |
| 24525 | 289 | 45 | 623  | AGCTCTTCTTGTGCGAGATATTATATGCTTTAATAATTGCAGCTTCTAGTCCCAAA     | 23864 | A_95_P188782 TA14646_4097 |
| 24528 | 289 | 48 | 267  | GCTTAAGTTGCAGCCTACATTTTGCAGTGAGCCTTAGTTCAATTTACAGGAGATTTAG   | 23870 | A_95_P107587 CV018454     |
| 24531 | 289 | 51 | 500  | CCATCAGTATTCGGCAGCTAAAACATTTGCTCATGTGTTTGGGTTTATGGATATTTGT   | 23876 | A_95_P186692 TA14180_4097 |
| 24534 | 289 | 54 | 499  | CGACGTGGTCACAACCCACCTTTGATGAGACATTTAATTGAACCTAATACTGTTTATC   | 23882 | A_95_P286548 FG635493     |
| 24535 | 289 | 55 | 835  | ATGCTTTGTGCTTTTGGGATGAATTACACTTGCATCACAAGAGGCAGATGGTCATAA    | 23884 | A_95_P292503 FG139517     |
| 24538 | 289 | 58 | 136  | AGAAGCAAGACCATCATTACACAGATAACAAACAGATTGCGCGCCATGTCACAAGC     | 23890 | A_95_P034209 AJ718283     |
| 24539 | 289 | 59 | 636  | TATTGCACTAACTTCTAACTTGCCAGTTGCTTTGAGGTGCGTAATTAAGTCTCAGCA    | 23892 | A_95_P116892 DV159674     |
| 24543 | 289 | 63 | 789  | GAAAGGTTTCTGTACTTGCCAAGGTTATCTGGTTTATCTTTACTTTGTTAATTTCCAT   | 23900 | A_95_P269291 EB450319     |
| 24544 | 289 | 64 | 819  | ACTTCTGATGGGCAACATGCAGTTAGTGAGTGCTTTCTAGATGACATTGGGCAAGAC    | 23902 | A_95_P293838 EB438212     |
| 24550 | 289 | 70 | 560  | ACTGAAAAGTTTGTCACTCTATCCAGTCATTTGTAATTGTAATCCGAAGGTGCAAG     | 23914 | A_95_P151037 EB681257     |
| 24551 | 289 | 71 | 1753 | TACTTCTATTACCCCTACAAGAGAAGACTAGGTACTGTAAAAATTAATCTCGTCTAAAG  | 23916 | A_95_P182942 TA13341_4097 |
| 24557 | 289 | 77 | 524  | ACGTACGATGAGAGGAAAGCTAGGTTGATCGAAAGACTCAATGCTTTGAATGCTGCT    | 23928 | A_95_P048311 BP131873     |
| 24560 | 289 | 80 | 864  | GACTCGTCAATATAAGGTACCTGTCATAATTGCTGACTTTTCTAGCTTTTACTTCTTAAT | 23934 | A_95_P208187 TA18913_4097 |



|       |     |    |      |                                                             |       |                           |
|-------|-----|----|------|-------------------------------------------------------------|-------|---------------------------|
| 24566 | 290 | 1  | 602  | TGCCAAACATCTCCGACGATCAACTTTGATCATTTGTTTGCCTATTTATATGATCATT  | 23777 | A_95_P129107 FG136481     |
| 24568 | 290 | 3  | 199  | TTTGGGCCTATTTGCTTCTGGATTACTGGGACTAGGGAGATTTTGACAGTCATGAAT   | 23781 | A_95_P036663 BP128790     |
| 24578 | 290 | 13 | 622  | TACTGATGAGTGTTTGCCTTCTCTTTTCTTTATTTGGGGGTTGGGGTTGGGTGAGG    | 23801 | A_95_P195127 TA16049_4097 |
| 24579 | 290 | 14 | 466  | GTTACATAACCAGCATCTTTGCTTGGGTTTCATATTACACTGGATCTGGGATCTGGT   | 23803 | A_95_P238824 AY081941     |
| 24581 | 290 | 16 | 458  | ATTCCTTTCATTCTAGGAAGCTGGAGTAGTATAATACTACTGCACTAAGCTGCAGTGTA | 23807 | A_95_P262941 BP530854     |
| 24582 | 290 | 17 | 450  | CAGCTCAAAGCACTTATTTTCGTAGCTTTACTTTTCTGGTGCATTTACAACAGAGGTAA | 23809 | A_95_P004686 TA13685_4097 |
| 24589 | 290 | 24 | 441  | AGGGGTATTTATGTAATTCATGTGTTGGTCCACGTTTCAGCTCTTTTCATTCTATTGC  | 23823 | A_95_P125462 EB041772     |
| 24590 | 290 | 25 | 537  | CTCAGACTTGTTTTGTTAGTTTGGAGAGACTTCGCTTCATGCTTTCTACATTATTTAC  | 23825 | A_95_P153472 EB683730     |
| 24591 | 290 | 26 | 359  | CTCAAAGGCTATTC AAGCAATTGTGTTGTTAGATCCACCAGTCTACATTATCCACAC  | 23827 | A_95_P053526 BP133201     |
| 24598 | 290 | 33 | 607  | GATATTGGGAAGAGGATTTGTCCGTTATTTGACAGCAAGTGTGATGAATTTTCAGTG   | 23841 | A_95_P243872 FG642795     |
| 24601 | 290 | 36 | 776  | TATAAGTGTCTATATATCTGACCGGTTAAGGGGGAGGTTTTGATATTTCTGCCAATC   | 23847 | A_95_P272226 EB450882     |
| 24603 | 290 | 38 | 876  | GCTGCTGCTGTCGAAGCTTTTGTGTGACATAGTATTTTCTTCTGGTGTGCACTTTA    | 23851 | A_95_P267726 EB450082     |
| 24606 | 290 | 41 | 871  | GATGTGTTGGAGTGAGACTCTGAAGATCTGAAGAACGAAATTTAGAAATTGTTTTC    | 23857 | A_95_P234189 DV998837     |
| 24609 | 290 | 44 | 382  | AGTTGGGTTGGATTTCCGCTTTTATCTATACTTTCCGCTATTGGATATTATGAAAGAG  | 23863 | A_95_P098598 BP534564     |
| 24617 | 290 | 52 | 798  | TTTGCATCATATTCTTGTTGCGAAGATACGCACTCGAGCTCAAACACTCAACCCAGCTC | 23879 | A_95_P311113 FG168999     |
| 24618 | 290 | 53 | 690  | CCTTTAGCAGCTTGGTTGGATAGTTGTTACCCTGTATTATATTGTATTGGTACTCTAA  | 23881 | A_95_P161702 EH620352     |
| 24620 | 290 | 55 | 1640 | ACCATTGTGTCATAAAATGAAGTTATCTCCACTATATATGCACGGGTCATTCGTTGCTG | 23885 | A_95_P199512 TA17010_4097 |
| 24624 | 290 | 59 | 906  | ATCGTGCTACGGTGATGTGAAATGATACTGTATGAATCCAAGGAGTGCTATATCTA    | 23893 | A_95_P204527 TA18085_4097 |
| 24626 | 290 | 61 | 825  | TATTGAAGATCCTGATGGTTACAAGTTTGAACCTTTAGAGAGGGGTCCAACACCCGA   | 23897 | A_95_P137977 EB441692     |
| 24628 | 290 | 63 | 403  | GGATTTCTGCTAAAATATTCTTCAACTGGTGAAGAATGTGCACTTCCAACTGATTTT   | 23901 | A_95_P054781 BP133533     |
| 24629 | 290 | 64 | 771  | TGATTTTGAATGGACGGCGTTGAGCTGACCCCTGAAGAACAAGCAGCATTAGCTGA    | 23903 | A_95_P218147 TA21108_4097 |
| 24632 | 290 | 67 | 683  | GAAAAACACAGGGGAGCTATTACTGTCATTCGGTACTCTCCAGATGTTTCCATGTTTC  | 23909 | A_95_P151842 DV162033     |
| 24635 | 290 | 70 | 1987 | GTAACCTCAACTCTGGTTCTCAGATAGTCCTGTAGTATATTTTGTGTTTTCAGAGTAC  | 23915 | A_95_P026826 TA13109_4097 |
| 24636 | 290 | 71 | 451  | CTACTCCCTTGGTATTGTCTCATTGGGTACATGTATATTATTTGTGATGAATGAGACG  | 23917 | A_95_P212247 TA19792_4097 |
| 24638 | 290 | 73 | 782  | ATCAACAGAGAAAGTGCATGCTAACCAATGTAGTCTATAGAACCACCATGTAAAATTGT | 23921 | A_95_P149737 EB679689     |
| 24640 | 290 | 75 | 312  | CTGTGGTCTTGCTTGTGTTTTAATGGTTTTGAGGACTCTCGGTAAGGATTATGATATG  | 23925 | A_95_P151562 AM818734     |
| 24642 | 290 | 77 | 877  | AGCGGCTTATTAATTGTCTCCTGCTCCAGTATAGTAAATTATGGGAAGCCCGAGTT    | 23929 | A_95_P218457 DW001338     |
| 24643 | 290 | 78 | 1403 | CCAACCTGCATGGTAAATTCTAGTACGGGACCAATCCCACCATTTAACCTTCTAATAG  | 23931 | A_95_P013081 TA13401_4097 |
| 24645 | 290 | 80 | 394  | AACAGCGTGTAACATGCGATATCCAACCTTTTATTCATCAGAAATGTTCTTACCCTAT  | 23935 | A_95_P133357 EB434809     |
| 24649 | 290 | 84 | 490  | TACATGAGTTGCATCTCTTGTGTTGCGATCCGAGCGCAATAGAGTCTCCTTCAGAGTT  | 23943 | A_95_P055476 BP133712     |
| 24652 | 291 | 2  | 526  | ATGGGAGGAGCATTGTAGTATTGTTGAGTTGAGTATCACACAAGATGTAAAATCCTA   | 23948 | A_95_P140532 EB444428     |
| 24655 | 291 | 5  | 317  | TTTATTCCTATGGAAATTGTCTGTAACCTAAACAACCTTACCGCATATGTAGCTGCT   | 23954 | A_95_P028701 EB451322     |
| 24659 | 291 | 9  | 344  | GGCAGGGCATTGGTGGGAGCCATGTAATAAGTGAATAATTGTTTTCTATCCTAAATA   | 23962 | A_95_P178987 TA12399_4097 |
| 24661 | 291 | 11 | 218  | GGCAATTGAGAATAGTCCTTCTTACAGTGTATGCCTGAGCTATTGGAAATGTCCTTT   | 23965 | A_95_P131847 EB432273     |

|       |     |    |      |                                                               |       |              |              |
|-------|-----|----|------|---------------------------------------------------------------|-------|--------------|--------------|
| 24662 | 291 | 12 | 557  | TAGAGTCTATTTGGGTTATCATACGGTCGCACAGGTATTTGCTGGAGCTACTTTAGG/    | 23967 | A_95_P156872 | EH616675     |
| 24665 | 291 | 15 | 780  | TGTAGATTTTCATATTTGTTTCATCACTACAAAGGTCTGATTCTTCCTTGCTCTATTTGCC | 23973 | A_95_P150552 | EB680665     |
| 24666 | 291 | 16 | 834  | AACTGAAGCAGCTTTGCTAGTAGTACTGGAGAAGTTCTTTGAGGTGGTTTTGAGCCT     | 23975 | A_95_P148837 | EB678368     |
| 24667 | 291 | 17 | 979  | CTGCTGTTCTCCAATATATATTGCTCTTTTTGCACTGAGAAGTGTCCAAAATCATTA     | 23977 | A_95_P018401 | TA16244_4097 |
| 24668 | 291 | 18 | 612  | CGGTGCATGTGGAGAAAATCCAAGAAGTTGGCTATAAGATATTTATTTCAAGTGCAA     | 23979 | A_95_P307983 | FG640354     |
| 24669 | 291 | 19 | 892  | GCTTGCAAAAAATCCAGCTCTGGCCAATGAGAAGTGGGACAGATTTCTTCCGCAGTT     | 23981 | A_95_P012526 | TA20719_4097 |
| 24672 | 291 | 22 | 765  | GGATAGCAAGCTGTGACAATCTAAAGACTTGAAGTGGACCATTTAACATATTCCTTT     | 23987 | A_95_P010101 | DV159747     |
| 24674 | 291 | 24 | 349  | GTACCTTGTTCTTCTGGAGGGTACAAAGTTTCCAGCTATACATTATGCATCTCTAAT     | 23991 | A_95_P159367 | EH617504     |
| 24675 | 291 | 25 | 349  | GCTGATTTCCAAGTGCATAGATTATGGATGTGATTTTCAAATCTCACTAGCAAAGT      | 23993 | A_95_P133047 | EB434099     |
| 24676 | 291 | 26 | 826  | GAAGAGCTGCAAAGCTTGTTAACTTATTATACTTCTTCTCTAAATCTGTTTCAGAAAC/   | 23995 | A_95_P272146 | EB447902     |
| 24681 | 291 | 31 | 480  | TGGGAGGCAATATTTCAAATTTCAATTTGGCAAAATATATTTGAGAGTCGAGGTTTCCC   | 24004 | A_95_P266191 | BP532909     |
| 24682 | 291 | 32 | 645  | GGATCTTTGATAAATTACAAATGTGGATCAGTTGAGACTAATGTTTGAGTCTGGTAT/    | 24006 | A_95_P029211 | TA13069_4097 |
| 24689 | 291 | 39 | 627  | TCCTCTGACGGATGCGAGTATAGTCTTGATGTAGGTGAGGATGACTCATAATCCTTT     | 24020 | A_95_P051941 | BP132789     |
| 24690 | 291 | 40 | 896  | AATGGGAAATTTACTCGTGACCAGTCACTTGTATATACTGCTGTCTCGACGCTCACG     | 24022 | A_95_P012011 | EB440534     |
| 24692 | 291 | 42 | 305  | AAGCTGTATAGAGACAATCTGCATTTCAGAACCTGAAATGAATTTTGCTCTTTGATCT    | 24026 | A_95_P025951 | BP131112     |
| 24693 | 291 | 43 | 263  | CTCACATTGTTAAGTTGAGTTTTGTTGTGACGATCTCAAATTTTGCTTGTCTTTGC      | 24028 | A_95_P133537 | EB435095     |
| 24698 | 291 | 48 | 690  | TTCCAGTACTACTTAATGACGCCGGGAAACTGGCTCACTCAAAGCAGCTTCTGCTA/     | 24038 | A_95_P300293 | FG190228     |
| 24699 | 291 | 49 | 706  | ACTGACCAAAAAAGTCAAGTGTATGATTTGTTTCTTCCATTTTCTTCTGTTTTCT       | 24040 | A_95_P022381 | TA13660_4097 |
| 24700 | 291 | 50 | 319  | TTTGAGCCTAATTGGGAATTGAATGATAGAGATTTTAGGGTATGGAAGAGGACTGT      | 24042 | A_95_P143302 | EB446644     |
| 24703 | 291 | 53 | 434  | TTGTGTAGGCAACTGTGTCACTAGTTTGTGTCTCGTTCAAGTGTACTATTTGAGTT      | 24048 | A_95_P226425 | EB437833     |
| 24705 | 291 | 55 | 823  | CGCCCGATGTCTGAACTCTGAATCTATGTGTTATTGTTCTTTAATGCATCTGTATAAT    | 24052 | A_95_P008116 | DV157864     |
| 24707 | 291 | 57 | 1398 | CTGTGATGTCAAATTTGATTATTTGTTTTGGCTGGTAATCTCATTGGAAGCTGTGAC     | 24056 | A_95_P221592 | TA21851_4097 |
| 24708 | 291 | 58 | 904  | TAGCATCCACCAATGCTATAATTTCTGCTGCCTGTGCTTTGGAGACCTTGAAGCTTGT    | 24058 | A_95_P220082 | EB427964     |
| 24709 | 291 | 59 | 131  | TTCACACCTTGAACGTAATGTACATCTCGAATGAGCACGCCATGTTTCTACTGTTAG     | 24060 | A_95_P241885 | AJ718708     |
| 24713 | 291 | 63 | 825  | CGATCAAGCTTATATACTGAAGTTTGACAAGGATACAAACATATATAAACAGCCAAG     | 24068 | A_95_P290178 | DV162082     |
| 24722 | 291 | 72 | 790  | GTAAAGAAGTTAGGCCAGCAAGAGATGAAGAAGTCCATCTGCTTTCTGTTGGAAGAG     | 24086 | A_95_P255884 | EH616991     |
| 24723 | 291 | 73 | 397  | ATATGGCTTTAGTTATCGTCGTCAATCTTCCAGAGTTATTGCTCTATTGAGGGCTGGGC   | 24088 | A_95_P095848 | BP533364     |
| 24725 | 291 | 75 | 535  | CTACCTATCCTTGCAGACATATCTGATTTGGAGAAGCAACTTTCAGATCAATCAAAT     | 24092 | A_95_P072370 | BP525944     |
| 24730 | 291 | 80 | 863  | GTTTGTGTTATCAGGTCCTTGGCACTAGATTCTTATCCATTGTCATGGCTAAATATTTA   | 24102 | A_95_P013131 | EB451357     |
| 24737 | 292 | 2  | 312  | GATGAGGCTCTTAACCAAGGATACTAGAGTTTTTCAATCTAAGCTTTTTCTTATACTT    | 23949 | A_95_P102182 | CV015908     |
| 24740 | 292 | 5  | 606  | CGAGTCTGTTTTCGCTTTAAGGCGTGTTTGATTTAATTTTGTGAAATCTATGGGG/      | 23955 | A_95_P177572 | EB432034     |
| 24743 | 292 | 8  | 324  | GGAACCTTGTGCTTGGAAAGCTGTCCACATTTGAAAAATTGATGACTCTTCTGGTT      | 23961 | A_95_P122092 | DW002140     |
| 24750 | 292 | 15 | 827  | CAGGATATGATCTGGAGTCTTTGAAACAGTTTTTATCTGTTTACTGTGTTGTGGATT     | 23974 | A_95_P008641 | TA13791_4097 |
| 24756 | 292 | 21 | 667  | ATACCATTTTGTACTCTAATTGCTTCATAGGCGCTATTAGGTCCCTGATAAACATTCC    | 23986 | A_95_P117782 | DV158020     |

|       |     |    |      |                                                             |       |                           |
|-------|-----|----|------|-------------------------------------------------------------|-------|---------------------------|
| 24760 | 292 | 25 | 413  | ATTGAGGGGTATGTGGAGAAATATGGAAAATCTTGAGATGAATTTTGTCTACGTGC    | 23994 | A_95_P114982 CV507107     |
| 24761 | 292 | 26 | 489  | CCTGATCTATGCCCAAGTCATCCATATTTTCTGAACTTAGATCATAGATCAATAATGAC | 23996 | A_95_P129692 EB429656     |
| 24767 | 292 | 32 | 579  | TAAATCTTTCGGACCTTTATTTGTAGAATTCCTAGAAAAGTTTGTGGATTTTGTGGCAC | 24007 | A_95_P307508 FG645125     |
| 24769 | 292 | 34 | 804  | TAATATACTTCGGCGCTTAGCATCCTATGGCTGTAAAATCACTGTTGTTCTTCAACAT  | 24011 | A_95_P152477 AJ319873     |
| 24770 | 292 | 35 | 905  | CTATCAAACCAAAAAGAAAAAGCTGTGTTTTGCCTTGTCTTACAACTTGTGGATGAT   | 24013 | A_95_P024371 TA18559_4097 |
| 24772 | 292 | 37 | 489  | GCTTCTTCACTTAAAAGGGAACCTCACAGTTAAGGTCTATCTCATCTCCCTTTCTATT  | 24017 | A_95_P208662 BP530687     |
| 24773 | 292 | 38 | 733  | CCATGGCTATCACCTATGCCAAGAAATGAGCAATTTTAATTCAGGACACAGCTATGC   | 24019 | A_95_P234714 FG644997     |
| 24779 | 292 | 44 | 106  | CTTTTTACTCATGAAGAGCCTATTGTGTTTGTGAGTCTGTATCCTATAATTCATGTGTA | 24031 | A_95_P130172 EB430216     |
| 24784 | 292 | 49 | 139  | ATTGACACCGTAACTTCGGAAGAAGGTGTGCCTTTAGTAGGTGAACCATTACTTGG    | 24041 | A_95_P143732 EB446943     |
| 24786 | 292 | 51 | 164  | TATAATGGGAGGTGTATTGGGTAAGAATGAATCTCCCTGGCTTCTGTCCCGGAGACA   | 24045 | A_95_P148137 FG194427     |
| 24792 | 292 | 57 | 627  | GTGTTAGGGTTTATGTTAGTCTGTGTATACAAATGAAATGATGAATGAAAGGCCAT    | 24057 | A_95_P241195 FG146706     |
| 24795 | 292 | 60 | 674  | CAGAAATGACTCTCAGAGTTCACCCTATAATTTGCTGATATTTTATATGTTTGACTTG  | 24063 | A_95_P053831 BP133290     |
| 24797 | 292 | 62 | 305  | CCAAAGGGCGAATAATTCTACATATCCTTTTGTCTTCTTTGTGTGTTCTTCTGACTG   | 24067 | A_95_P091393 BP531337     |
| 24798 | 292 | 63 | 933  | GTTTTGCTTGTATACTATTTCCCTCTCTCTGAAAGACTGGCTAGTAGTACTGAAGCTGC | 24069 | A_95_P008991 TA12943_4097 |
| 24799 | 292 | 64 | 615  | GGTGGGGGTTTGTGTTGACGTTGAAAATTTGATAAAGAAATGAGGGTATTATTGTCA   | 24071 | A_95_P032071 TC74049      |
| 24814 | 292 | 79 | 725  | GTCTCTGTCCATCCATGCTAACTTCTGGCAATCACTGTATCACTGTGGCTAAGTTTT   | 24101 | A_95_P000526 EH623004     |
| 24816 | 292 | 81 | 421  | CCTTTTCGGTCTGATGAATGCATTTGTTACGCGATGTATTAGATACTAATTAACACA   | 24105 | A_95_P276703 FG635575     |
| 24817 | 292 | 82 | 36   | AAAGGAAATGAACTAGCCAAGGACGAGCTCGAAGACATTTGAATTGTGTTGGCTT     | 24107 | A_95_P132432 EB432894     |
| 24826 | 293 | 6  | 259  | CATGGATCTTCTCGATCCTGTATGTGTAGTTCATATTTGGAGTACAATCCTATTATAGI | 24124 | A_95_P029661 TA19597_4097 |
| 24827 | 293 | 7  | 763  | TGAAGGACGTGATCTTGCTCAGGAAGGTAATGAAATTATTCGCGAGGCTTGCAAATC   | 24126 | A_95_P246927 EB432816     |
| 24829 | 293 | 9  | 853  | TTACCATCTTGCGCAGCAAAGACTTGCTTGGGTGTCTGTGTTTATGATTTATTGCTC/  | 24130 | A_95_P269696 FG148776     |
| 24830 | 293 | 10 | 516  | GTATAACAGTCGTAGAGTGGTTAGTAACATGAGCATCTCTGCTCCTGGTATTTAAACC  | 24132 | A_95_P108137 CV018687     |
| 24835 | 293 | 15 | 805  | ACCACAGTCTGAGACATACGCTTACTGGTGAAAATGATGTTGTTGACGTGGATCTC    | 24142 | A_95_P012021 EB424612     |
| 24837 | 293 | 17 | 259  | CTCGTCAGCAAAGCAATTTATGGGTCATACTTTGGTCCATTAATAAACAATATGTTTG  | 24146 | A_95_P110997 CV019999     |
| 24839 | 293 | 19 | 615  | CAATAGCATTAAAGCATTGCCCTCTGCAGGAAGACTAATGATGCTTTGAATTTGTTTA  | 24150 | A_95_P012471 EB431036     |
| 24842 | 293 | 22 | 167  | CGTAGGTTTGAATCCTACTTGGGGAGATTTGATTGATTCTGAATTAAGAATTCAGA/   | 24155 | A_95_P029086 TC72383      |
| 24843 | 293 | 23 | 1081 | ACCTCCTTATATGTACAAATGGCGGATTTGGAGAAGAAACAGCAATTGCTTGTACA/   | 24157 | A_95_P183707 TA13518_4097 |
| 24848 | 293 | 28 | 862  | AATGAAAGCTGTGGCTGACTAATTAGACGTGAGTAGGTCAGTATCTCACCTAGCTAG   | 24166 | A_95_P305328 FG144744     |
| 24853 | 293 | 33 | 767  | GGTTGCTGTAGTAACTAGCTGCCAAATTTGTCTCATTAAGAGCTTTCGATTAGTTAT   | 24176 | A_95_P247157 TA16465_4097 |
| 24854 | 293 | 34 | 810  | CACAGATGCCAAAGCAAATAGAGGATGCCAAAAATTGCGATCCTGACATGTCCTTTT   | 24178 | A_95_P180132 TA12668_4097 |
| 24857 | 293 | 37 | 665  | TTCAGTAATTGTTTGTGAGAATTTATTTGTCAAATTAATAGGAGGCACGGTTCATC    | 24184 | A_95_P124587 DW004385     |
| 24864 | 293 | 44 | 744  | ACAGGCTAGCTTCTTGTCTTGTCTAGACAATCTTTGTTGGAATGGTGGTGTAGAT     | 24198 | A_95_P264126 EH616914     |
| 24866 | 293 | 46 | 391  | CGTCTAATTGACTCTGCAATGAGAAAACTCTAGGTTTTGGTTAATTTAGGTGTAATG   | 24202 | A_95_P092648 BP531912     |
| 24868 | 293 | 48 | 883  | TGGTTTTTGTATGGCTATATGCCGAGGTTTCTGGTTGTTGGTGTAGTTGAGTGTAGC   | 24206 | A_95_P268411 DW001352     |

|       |     |    |      |                                                              |       |                           |
|-------|-----|----|------|--------------------------------------------------------------|-------|---------------------------|
| 24869 | 293 | 49 | 874  | TACGCGGAAGCTTTGCAGAATTATTATGAAGCTATGCGACTAGAAATTGATCCCTATC   | 24208 | A_95_P246537 DV999238     |
| 24871 | 293 | 51 | 666  | CTCTTGTGTCTTTCTGAAAATGGGGAGGTTTTATTTTACTGCTCCGCCAATGAGTAAA   | 24212 | A_95_P195617 TA16156_4097 |
| 24877 | 293 | 57 | 627  | GTGAAGGAATGAAGTAATAGAATTCCAGAAAGCTCCAGTTTTGTTTATGAGCTTTAC    | 24223 | A_95_P150932 EB681080     |
| 24878 | 293 | 58 | 480  | CGAACCAAGAGCTGGGATCAATCCTTTCCCTTTTGATTTTCGGTTTTGGTCAAAATTCTG | 24225 | A_95_P091593 BP531425     |
| 24879 | 293 | 59 | 506  | AAGAGAACTTCTTGAAGAACCAGAGGCTTCTAACACGGATGTATACGAGTCAAATCC    | 24227 | A_95_P110897 TA13017_4097 |
| 24880 | 293 | 60 | 376  | GCTTTAGTCGGTAAACTACTGAACTTGTTTCAACTTTGTGAATTTTGTGAGCAGCTTTCT | 24229 | A_95_P163207 EH622180     |
| 24882 | 293 | 62 | 424  | AGCACTTGTAGTCTGTAGTTGCTCAATGAATGTACTGTTCTATCAAGAACCATAACTA   | 24233 | A_95_P117927 DV160902     |
| 24883 | 293 | 63 | 442  | TCTGGAGCTACTAACTTTGTATTTGACTCGATTTTATGGTAGAAATGGATTAAGT      | 24235 | A_95_P125397 DW005183     |
| 24884 | 293 | 64 | 327  | GGAGCAAATTTGGGACAACTTCTAACAGCCAGATTCTGAGGTTATTATATAAGAA      | 24237 | A_95_P181592 TA13016_4097 |
| 24885 | 293 | 65 | 641  | GGCATGTTGCTCTTCATCTTGATGGTCATTAGATTTTAAAGCCCCTATATTATTGTTCC  | 24239 | A_95_P270611 FG642619     |
| 24886 | 293 | 66 | 154  | TAAACTCTAAGCAGATTGCGCCAAAATGGCTGCTGAAATTTTAAAGGGAATGGGGG     | 24240 | A_95_P315378 FG182040     |
| 24887 | 293 | 67 | 595  | AGTTAGCGGGCACAAATGGTGCTACAGTCAAGGGATTTGAACTCATAGACGAGATC     | 24242 | A_95_P292328 EB428944     |
| 24889 | 293 | 69 | 768  | TATGGGCCCTACTGGGACTGTTGTGAAATTTCTGGAAGATATGGGTTTACCTCATTTT   | 24246 | A_95_P118827 DV161900     |
| 24894 | 293 | 74 | 823  | GTCCTACGCCACAACTTTGTTCCCGGAAAATGAATACTATCACAAAACAATCTTAAA    | 24256 | A_95_P003166 TA11664_4097 |
| 24895 | 293 | 75 | 706  | TTGTGGCTACATTAATCACTGTCTACGCCAACTGGACGTTTGCTAGGATCCATGGGA    | 24258 | A_95_P292264 FG194373     |
| 24897 | 293 | 77 | 874  | TTAAACACAATCCCTGTCTCTGTCTTAATGAATTCAATTACTGCACTTGTGCACAACT   | 24262 | A_95_P269711 EB426072     |
| 24900 | 293 | 80 | 1148 | GTTTCGTGAACTCAATGATCGGGGTTGGAACAGTAACAATCATAGTGTGTGGTTCG     | 24268 | A_95_P223452 TA22254_4097 |
| 24904 | 293 | 84 | 397  | GTTGTGGAAACCATTTGAAGACCCATCATTCTGCTGGATTAGTTATATAATGACATTA   | 24274 | A_95_P099648 FG636194     |
| 24905 | 293 | 85 | 852  | AGTCTTCCGTGCTTTGTAGATCTAATCTGTCTGTATATAATGCCCTTAGCAGAAGG     | 24276 | A_95_P009661 EB679350     |
| 24908 | 294 | 3  | 775  | AGTACAATCATAACAAAAGATCATCATCTACTCCTAAGTCATTCCCTCCTCTATTCT    | 24119 | A_95_P138237 EB441981     |
| 24917 | 294 | 12 | 859  | GCTCAGCACACATTGAAACAATTTATTTTGTCTCCAGTGACATCTGTATTCTGTAAC    | 24137 | A_95_P285668 EB432066     |
| 24921 | 294 | 16 | 495  | GCACTATAAAATTCCAATATGAAAAAGGTGCTTTTGCATGGGAATTGCTGTGCGTA     | 24145 | A_95_P104937 CV017229     |
| 24923 | 294 | 18 | 1990 | CTCTTATGTGAAAGAAAACATCTCTGTGCAAGTCAACAAGCTAAACAAGTTAGAAATC   | 24149 | A_95_P195577 TA16147_4097 |
| 24924 | 294 | 19 | 908  | GCTGTTGCTGCAGACTCGTAGAGAGAATGAGTTATGAGGAATAAGTAGGAGTTAAC     | 24151 | A_95_P235169 EB424981     |
| 24925 | 294 | 20 | 604  | AGAGAAGCCATCTTGACATTGTGAGACAAATTTGCTATACCATTGTTACTGAAA       | 24153 | A_95_P133072 EB434140     |
| 24927 | 294 | 22 | 534  | GCTCAATCGAACGTCTGAGATAGTTGAAGTTGGAAGAGAAGCGACAAGACAGAAAC     | 24156 | A_95_P058521 BP134493     |
| 24928 | 294 | 23 | 430  | AACTCAAATTTGATGACCACATTGTTTATGAGCAAGACTACCTCGTCCGCGTTCTTCA   | 24158 | A_95_P103057 CV016321     |
| 24929 | 294 | 24 | 388  | GCAACGTTCTTGCAGTACACTATATACCTGTCAATTTGGATATGAAATTTTGTTCGTA   | 24160 | A_95_P308788 FG643619     |
| 24933 | 294 | 28 | 751  | GTGAGTTATCCGTGCAGCACGTGAGTGCCGTGCGATCAGATATAATATAGAACATG     | 24167 | A_95_P314678 FG175728     |
| 24935 | 294 | 30 | 504  | GACCTCATGAATGTAGTGAAGTCAAGTAAAGCTGATACTTGACAGCAAATATAATT     | 24171 | A_95_P015421 EB444300     |
| 24937 | 294 | 32 | 970  | ATAATATGATCAGAGGGGGCGCCATTATAGAGGGTTTTCCACAATTTTAGCCTGT      | 24175 | A_95_P100558 BP535429     |
| 24942 | 294 | 37 | 104  | GGTCACTGTAATAGGTTTATGTATGGTCAGTATTATTTTTGACGTGTTTGGCAAGTT    | 24185 | A_95_P135807 EB439364     |
| 24943 | 294 | 38 | 369  | AAACGTGGAAAATATCTTCAAAAAGAACTGGGCAGTGGTAAGGAACCAAATCGAT      | 24187 | A_95_P079940 BP527888     |
| 24949 | 294 | 44 | 796  | TTCTGAGCTATGTAAAATGAGGAAAATCTTAGCTGCTATGATGAACTGTATCTTGAC    | 24199 | A_95_P118052 DV161057     |

|       |     |    |      |                                                              |       |              |              |
|-------|-----|----|------|--------------------------------------------------------------|-------|--------------|--------------|
| 24950 | 294 | 45 | 731  | GAGGGTTTCTTCTGTGTGATATGCTGAGTACATTTCTGATGATATGTTCCACATATTA`  | 24201 | A_95_P234114 | FG645193     |
| 24951 | 294 | 46 | 1102 | CCAAATCGAACTGTATGTTGTTGTATGTATCAACCAATATCAAAGAGCACCAGTTCTT   | 24203 | A_95_P178252 | M94135       |
| 24953 | 294 | 48 | 798  | AGTTCTGCCATGGCACAGAGAGCACATGACCTGTCAACATTAAGGGTTACAGTGGT     | 24207 | A_95_P009876 | EB681289     |
| 24958 | 294 | 53 | 469  | TCGCCGGTATGACTCTTTCTGCTGGAGATTAGAGTCTTTCTGCTGTGGAACAGAATGI   | 24217 | A_95_P080445 | BP528005     |
| 24963 | 294 | 58 | 291  | ACTAGCTACTTATGTTTCATGTTTTAGTATTAGGCCTCTTGCCCAAATAAGCAGTCTTGT | 24226 | A_95_P113972 | CV021387     |
| 24966 | 294 | 61 | 879  | CCGAATTGCTTAATGCGTTGCTCTTGTGTGAATCATGTTGAATACAATCAAATCTCTC   | 24232 | A_95_P210567 | TA19424_4097 |
| 24971 | 294 | 66 | 864  | CATTTGTTACTCTGGTCGAAGGTGTTCCATACAGTGTGACCTGCGAAAAAGTCTTGT    | 24241 | A_95_P205297 | TA18249_4097 |
| 24972 | 294 | 67 | 538  | ATTGGGACAGAGAATGATAATACGGAGCTTCATTTTGTCTTTTCTATTCTCAGATAT    | 24243 | A_95_P308948 | FG644146     |
| 24976 | 294 | 71 | 526  | TTCATGTACTTTAAATGAATGAAAACCAAAGAAGTGCCATCCTCCGTTTTTCATGTCTG` | 24251 | A_95_P026941 | TA12013_4097 |
| 24978 | 294 | 73 | 749  | GACCACTGACAGCTTTGTCCAACAGTTCAATGATGCCTTTGTTTTAATATACTACTA    | 24255 | A_95_P188677 | TA14623_4097 |
| 24984 | 294 | 79 | 848  | CTCTGAGGAGATGGAGTTTATCTGTTATCTATGCTTCTTTGTATATGTACGCTAGATA`  | 24267 | A_95_P298578 | FG168370     |
| 24985 | 294 | 80 | 829  | GAACCATAATCGGATTTTTGGTAGCTTACCAGAAGGATTGAAAGATTTACAGTTACA    | 24269 | A_95_P013371 | EB425603     |
| 24987 | 294 | 82 | 3141 | CAGATAAATCAGCTTCTTGCTAACCTTGATAGTATGTGCAGTTTACATCATACAACATT/ | 24272 | A_95_P222832 | AF203476     |
| 24990 | 294 | 85 | 528  | CTGGAAGAACGTAAACTTCTATGGTAGATTGTATAGACATTCGTCGTTTTATCCTGTT   | 24277 | A_95_P123672 | DW003534     |
| 24992 | 295 | 2  | 824  | ACAACACTGCGCTGATAAAAAGAGGTTTCTCAAGGCTATTCTCATGAATGCAAGA      | 24280 | A_95_P017356 | EB446133     |
| 24995 | 295 | 5  | 960  | TATGTTTGCTTTAAGTTTTGCATCATCTCCCTTTGGTTTTGAATGTGAAGGATTTTCAGC | 24285 | A_95_P011906 | TA12876_4097 |
| 24996 | 295 | 6  | 807  | AGGGATACACTCATTCTATCTGCAGTCATTGTTGCTTGCCTTTGTTTCTTATTATCTA`  | 24287 | A_95_P142372 | EB445856     |
| 24999 | 295 | 9  | 440  | CTGCCAACGTATAAAAAATACGCCGATTTGCTGCAACATATGCATTTCACTATGTTCT   | 24293 | A_95_P153037 | EB683356     |
| 25000 | 295 | 10 | 428  | TGAGCATCTTCCACCCCTTCTTACTTTGTAAGTATGAGGAAATGAATCCCC          | 24295 | A_95_P104307 | CV016934     |
| 25001 | 295 | 11 | 458  | TGAACAGGAGATAAGAATCTCGTGGAAGATGAGACATCAACTTCTTTCTTTTGATAC    | 24297 | A_95_P099718 | BP535040     |
| 25007 | 295 | 17 | 833  | GATTGGGAAAGGCGATCCAGAATCATAGGAGGCGTTGCTAGGGGAATTCTTTATCTT    | 24309 | A_95_P116567 | DV159321     |
| 25008 | 295 | 18 | 1063 | CAAGAGTGGGTACGCTGCACTCATAATTATATTAAGGGAATGTTTATTTAAGGAGAG    | 24311 | A_95_P184852 | TA13786_4097 |
| 25015 | 295 | 25 | 345  | AGTCTAGTAGTTACCCAAACCTGCTCCGTATATTTTGCATATTGTCAAAGTGAGATCC   | 24325 | A_95_P140447 | EB444350     |
| 25016 | 295 | 26 | 688  | AATGAAGATAATAATGATGAAGGCATGTATTGAAGGTTGCTTGTGGGTGGTTTTCCG    | 24327 | A_95_P149582 | EB679481     |
| 25017 | 295 | 27 | 760  | ATCATCTCTCTCTCTCTCTCTCTTTCATCACAGATAAATAAGTGCAACGCATTGTA/    | 24329 | A_95_P160192 | EH618859     |
| 25020 | 295 | 30 | 277  | GTGGTAAACAAGAAATTGCAATTTGCATTCAAGTCCAGCAATAAAGTTCCATTTCTAGC  | 24335 | A_95_P133142 | EB434371     |
| 25022 | 295 | 32 | 1514 | AGATTGTCTCTTGTGTTCTGGTTGTTGGGCAGTTCTAGGTTTAAATGCCTCGCTCTCC   | 24339 | A_95_P015091 | TA14104_4097 |
| 25027 | 295 | 37 | 571  | ATGTAAATCCTGCAGAATCATGTAATTTGGCGGGGAGTAATGTAAGGCCGTTTAGAA    | 24348 | A_95_P114567 | TA13622_4097 |
| 25028 | 295 | 38 | 795  | TGAACTCATCAGGAGGATGAACTAAACAGTAGCCAGCAGTTTTGTTTTCTTTACAAG    | 24349 | A_95_P119337 | TA12229_4097 |
| 25029 | 295 | 39 | 804  | CGGCTTCTGAAAGTGCAAAGGAAATTGGCATTTTTGAATAAACGCACAAAAGTGGCT    | 24351 | A_95_P254579 | EH621504     |
| 25031 | 295 | 41 | 388  | AAAGGGTCAGGTGTTTGATATATTGGAATGAATGGTTGTGAATGCACTATGTTTCTC`   | 24354 | A_95_P026351 | TA17047_4097 |
| 25032 | 295 | 42 | 279  | CACTCTTGGCAAACACCTCATTTGTATTTGAACTGCACAGTTAATTACCATACAAAATC  | 24356 | A_95_P155147 | EG649922     |
| 25033 | 295 | 43 | 635  | GTTCTGTAAGTGTAGCGGGAAGTAGAATTGGAATAGTTTGTATACTAGTGTATCATT    | 24358 | A_95_P198297 | EB435329     |
| 25036 | 295 | 46 | 436  | TGATTCAGATCTTGAGGGATCAGTCAAAGATGACTCAGAAGCTGCTAACAAATCCACC   | 24364 | A_95_P120732 | DW000697     |

|       |     |    |      |                                                              |       |              |              |
|-------|-----|----|------|--------------------------------------------------------------|-------|--------------|--------------|
| 25039 | 295 | 49 | 892  | ACAATGGGTAATATTTTCTGCTTGGATGTTTTATTATGCAATCATGCTGTACTTTGGTC  | 24370 | A_95_P258771 | EB447549     |
| 25042 | 295 | 52 | 671  | ATTTCTGTTGATCATGTTGCTCATCTTAAACCATCTGATGGAGGTTCTGCTGCTACTCA  | 24376 | A_95_P207377 | FG172968     |
| 25043 | 295 | 53 | 605  | AGAGAAGAATTATGTACAGTTCGAGGAGGTCTCTTATCCTTATTTCTTTTGGTGG      | 24378 | A_95_P042406 | BP130350     |
| 25045 | 295 | 55 | 521  | GGCCGTAGTTATATATGTGAGGTGCATGTCCTATAATCGTTTGAAGTGTTTTTCTGT    | 24382 | A_95_P019451 | DW002669     |
| 25048 | 295 | 58 | 733  | GTCCTCTATGTTGCTTCTATGTTAACTTCTGTGATTATTATTGATAAAGTCGGATCGTT  | 24387 | A_95_P187417 | DV158956     |
| 25052 | 295 | 62 | 596  | GAACATAGACAGATTGTCTAATCCTCTAATTTACTAGGTAATTATCTCAAGCCCCTTG   | 24395 | A_95_P303503 | FG635016     |
| 25055 | 295 | 65 | 692  | GCAGCACGAGTCGCTGCATATAGTTTTGGAATGTCTCTTCGCTTGATGTCTAATATAT   | 24401 | A_95_P151752 | EB682010     |
| 25057 | 295 | 67 | 629  | TAAAAGATTTGACAGTCTTCTCCATATCTCCCCTCCGTGTTCTTCATTACTTCATCTGA/ | 24405 | A_95_P060410 | BP134989     |
| 25059 | 295 | 69 | 524  | TAGGGTTTGGTTCTGTTTGGTCTTAATCTAGGGTTCTGCCGATGTAAAAATAGT       | 24409 | A_95_P000911 | EB447085     |
| 25068 | 295 | 78 | 1893 | GTATGTCGCAACCAAATTTGTTGTACTGCAATTCTAGAACCAAGACTAGCAAAGCGT    | 24426 | A_95_P206542 | X99405       |
| 25069 | 295 | 79 | 1746 | TAGTATGTGGAGGTGTTACAGCTAACTGTCTCTGGTTTTCTAAACCGAAAAGAGGAAA   | 24428 | A_95_P124257 | EU418730     |
| 25076 | 296 | 1  | 768  | CCAGTACAAGATTTTATTCAGGGAACTTTCTCAACAAAAGAAAACCTATTGAGTTCCA   | 24279 | A_95_P131757 | TA13620_4097 |
| 25081 | 296 | 6  | 406  | TTCCCTAAGTATTTTACTTCTGTCTAACATTTGTTTGAAGTGAGATGTTCTTTCCAGG   | 24288 | A_95_P150677 | EB680812     |
| 25082 | 296 | 7  | 602  | AAGTAATTGTTATTCCTGTGCCATACAAGGATGCAAATACTCAAGGGATCTTTGATGC   | 24290 | A_95_P056386 | BP133941     |
| 25085 | 296 | 10 | 521  | CAACCCTTGGAACAAAAAGCTTTTACATTTGATCGTTCTATATATCCACATCTCTGTC   | 24296 | A_95_P021556 | EH622255     |
| 25086 | 296 | 11 | 772  | TGGTCTTATTTACAGTAATGTGTTTCATGAACCATGCACATGCCCTCTATCCACCGATT  | 24298 | A_95_P108127 | TA13827_4097 |
| 25088 | 296 | 13 | 401  | TTACGCAGAGCATGTTATGAGATGATTTTTCGGGATTAAGTACAGATAGTTCAG       | 24302 | A_95_P097378 | BP534013     |
| 25092 | 296 | 17 | 853  | TTGAATGCCATGTTAACTTTGCTCATTGGTTTAAATTAAGCTCTTTCGAGTTCTAACTC  | 24310 | A_95_P197052 | U91727       |
| 25094 | 296 | 19 | 459  | GATTTCAATTGATCTCTTTTGAAGGGAATGGGGTCCCTTGAAGAAGATGAAGATCT     | 24314 | A_95_P266001 | AM808208     |
| 25101 | 296 | 26 | 204  | CGTTTGGCATTACAAATCTTCTCTAGTTTGTGGCATAACCCTGTTCAATTATTCT      | 24328 | A_95_P130637 | EB430685     |
| 25105 | 296 | 30 | 496  | ACACCGTACTTTGTGAATCCAACAGTTGAGGGGCACTAAATGAGATTAATGATCTC     | 24336 | A_95_P226749 | FG641328     |
| 25107 | 296 | 32 | 985  | GGCTAGAAAGCAATGGTGTGACAACCTAATTATATGGTGTAGTAAAAAGAGTAGC/     | 24340 | A_95_P026481 | TA16566_4097 |
| 25111 | 296 | 36 | 662  | AGAAACTGAGCTTCTTACTTTGAAGTTACAGCTGAAAGCACATTTGGTTAAAAGAAC/   | 24347 | A_95_P222692 | TA22089_4097 |
| 25113 | 296 | 38 | 494  | AAGTGAAAAGCCAAAAAGAATGTGGAATAAAACGCTTTCTGGTTGGGAAGTGCTC      | 24350 | A_95_P005651 | EB449928     |
| 25114 | 296 | 39 | 778  | ATAGTGATGATGAGTACATAGGTGGTCCCAGACAACAAATCCGTCAGCCACTGATCA    | 24352 | A_95_P016521 | DV999592     |
| 25120 | 296 | 45 | 953  | GGGATTAAGATTGACATACTGCTCTGAGCATATTGTCCTTCTTTGTTTTCAAAGAT/    | 24363 | A_95_P018116 | TA13265_4097 |
| 25121 | 296 | 46 | 726  | GGGTTGGTGTGTATAGAATATAGCTGTTGCTTTTTACTTTTCTATTTTAGAGAACAC    | 24365 | A_95_P146157 | EB450063     |
| 25123 | 296 | 48 | 828  | ATGTAGCGCTGAAATCATGTGAAGTGGGGAGGGAGAAACACTGTGCTTGTTGATGC     | 24369 | A_95_P288493 | FG158472     |
| 25124 | 296 | 49 | 988  | ATGGTAATAGGACTTTTCAATTTCTCAACCTCAGAAGGCAAACACTGATGCCAATCAAAT | 24371 | A_95_P212897 | TA19933_4097 |
| 25126 | 296 | 51 | 777  | TTTTGCCAATGGCTGATGATTTCAAGAGTGCTCAAACGCATTCTCTGCTGAAACAAT    | 24375 | A_95_P182757 | TA13294_4097 |
| 25134 | 296 | 59 | 453  | ATGGCTGCATAGGTTGTCGTTCTCTATGCAAAGAGATGAGAGGTCCGATTTATAT      | 24390 | A_95_P083840 | BP528868     |
| 25140 | 296 | 65 | 297  | GTATTATCCGAAATTCGGACTGATTTTTGGGAAGTTATGCAATAAATTTACTCGGAC    | 24402 | A_95_P033534 | AJ632813     |
| 25142 | 296 | 67 | 335  | CATTTTGGTGATACTGTGCGATCTACGTTCAAGATGTTGAATAAATGTGTTTGTCTGT   | 24406 | A_95_P133232 | EB434548     |
| 25146 | 296 | 71 | 309  | TACCATTTACATCTTCGATTGACATTGCAGACTGCATGTTGAATGCTTCCATATTAAC   | 24413 | A_95_P094753 | BP532859     |

|       |     |    |      |                                                             |       |                           |
|-------|-----|----|------|-------------------------------------------------------------|-------|---------------------------|
| 25151 | 296 | 76 | 329  | TAGGAGCATTCTTCATCTTGTGCCAAACATAGAGATATTTTGCACACAATTTTACAAG  | 24423 | A_95_P044576 BP130919     |
| 25156 | 296 | 81 | 830  | TTATTGTGTCTAATCATGGGGCTCGACAACCTTGATTATGCTCCCACAACAGTTATGGC | 24433 | A_95_P147597 EB452103     |
| 25159 | 296 | 84 | 798  | TTCAAGTCTGCTACTGTCCATTCTAGTCTCCATGAACTGCTGATAAAGTCTGATCCC   | 24439 | A_95_P293033 FG147247     |
| 25160 | 296 | 85 | 747  | GAGCAGGAAAAGAGTACTGTGTTTCCATTTTATTGTATTTATGCATCAACTGTGGCGC  | 24441 | A_95_P303148 FG645303     |
| 25163 | 297 | 3  | 130  | GCAATACAGGTAGAATAGCTACGTCTAAATCATAAGGTGTTGTACTACCGTTAGGCT   | 24445 | A_95_P112407 CV020660     |
| 25164 | 297 | 4  | 452  | TTTGTAGCTGTGTTGCCTTTATGATTTGATGAGTGGTGAACCTATTTGTCTCATGTTT  | 24447 | A_95_P001541 EB643434     |
| 25166 | 297 | 6  | 754  | TGAGTTGGTCCCTTCAAATTGGCAGCTATTACCTAATTGATAAAAATTCAAAAGCCTTG | 24451 | A_95_P014046 TA12310_4097 |
| 25168 | 297 | 8  | 384  | ACATTAGGAACAGCTGCTTCATTCATTGTTTCTTCTGCCTGAAAGAACATGGTGAGG/  | 24455 | A_95_P064075 BP135950     |
| 25169 | 297 | 9  | 895  | CCTGTGCGTTGATTACTGTTGGTGTAGAGAGCGATTTACAATTTATTGTAACCTTTGTA | 24457 | A_95_P178822 TA12353_4097 |
| 25173 | 297 | 13 | 749  | CCACTTTGCAGGAGAACCTAAAATCATTGAGAGCTGTTTGTGGACTTGATATGGATG   | 24464 | A_95_P127912 EB427475     |
| 25174 | 297 | 14 | 867  | CTTGTAAGCATGAATTTGGTTGATGCTTGATCTCAGTACTTCTGAAATTTGCTTTATTC | 24466 | A_95_P048526 TA15300_4097 |
| 25177 | 297 | 17 | 1144 | ACTGGGTCCTTGATTCCCCCATTACAGAAGTACCGTCTGGTAGTACGGATAAATTCAT  | 24472 | A_95_P203897 TA17952_4097 |
| 25178 | 297 | 18 | 734  | AATTTGGGGCGAGAATATGTATCAGCTCTATAGAGGGCGGCTACCATTCGCCCTCTTT  | 24474 | A_95_P146437 EB450494     |
| 25181 | 297 | 21 | 1326 | TTGGTTCTATACCAGAGTTTTAAAAACCTAAAATGCTGTTATTGCTTGAATGTTGATG  | 24480 | A_95_P193742 TA15736_4097 |
| 25183 | 297 | 23 | 702  | TGTTTTGGTGTCTAACATATCAAAGGCGTCTGGGCGTATCCTACATGAATTAATG/    | 24484 | A_95_P235559 EB441645     |
| 25185 | 297 | 25 | 808  | TGAGCTAGATTAGGATGTGAGATGACAATTAGAAATGTTCTGATTATCTGCCTGCAT   | 24488 | A_95_P133672 EB435295     |
| 25194 | 297 | 34 | 581  | CCAAGAGAATAATAGTCTCTACCTCCACAAGGTCAGGGTAAGGTATGCGTACACA     | 24506 | A_95_P022956 TA21681_4097 |
| 25195 | 297 | 35 | 168  | GACATGATTGCAGTATTTCATCGGGGAAAAGTTGTTGAAAAAGGCACACATCACGA/   | 24508 | A_95_P078345 BP527493     |
| 25201 | 297 | 41 | 147  | GTGAATGCTTGTGTTGTGTGAATACTTCAACCCCATGGAATGCTACGTTTATTAGC    | 24520 | A_95_P129497 EB429431     |
| 25202 | 297 | 42 | 657  | TTATCCATTCTGGCCTTTGTAACACTCACTCGACTTGAAACCTTAACTGGCCAAAGAA  | 24522 | A_95_P260906 FG635915     |
| 25206 | 297 | 46 | 1121 | ATAGGATTGAGTCGTCGTCTACAGCATCTTTTTGGCCATTTTTCTTCTTTTACCATAGT | 24530 | A_95_P135242 TA15341_4097 |
| 25208 | 297 | 48 | 562  | TTAAATTGAAACCTTGCAGCGGCGAGGTATGTTCTTCAAAAATTGTTCTCAGATCTAT  | 24534 | A_95_P285203 FG639462     |
| 25210 | 297 | 50 | 609  | CTATCTGAGAAAGTTTTGGATTTTGATAAACGTTTCATGTAGCTGTTTACATGGTAAT  | 24538 | A_95_P020851 TA12379_4097 |
| 25213 | 297 | 53 | 140  | TTTTGATTTTGTGTAATAACATGGACCGCAGACTGGAACCTCGACGGAACGACAC     | 24544 | A_95_P130407 EB430452     |
| 25219 | 297 | 59 | 876  | GATTTCAAGAACCAATTAACCCCATCGATGCCGATGCCAGCCATAACAAAACCTTTG   | 24556 | A_95_P258796 TA12763_4097 |
| 25222 | 297 | 62 | 386  | GATGTTAAAGTTGATATCGACTTGGGCAGAGAAAGTCGCCATAATAAAAATTTCCAGA  | 24562 | A_95_P068280 BP137093     |
| 25224 | 297 | 64 | 271  | TAGGACTCTTATGGATTTGGTGGTTAAGTTTTGGATCTGGGTTTTGGGTATTTTGT    | 24566 | A_95_P025316 TA14098_4097 |
| 25225 | 297 | 65 | 407  | GAGGTTGTGAATGTTAATTGTCTAGTGATTTAGGAGGATCTATTCTCATATGGTGT/   | 24568 | A_95_P090413 BP530942     |
| 25226 | 297 | 66 | 698  | AGGCAGTTTTCTCATCTCATCTCTCTATGTTTTAGTCTTTTTCAAAGCAAAACAGT    | 24570 | A_95_P013366 EB677787     |
| 25233 | 297 | 73 | 442  | AGAGCTGGTTGTATGAACTATACTGAAGTTTGAATGCAAAGAAATTGGCGTTCCA     | 24584 | A_95_P134812 EB437619     |
| 25234 | 297 | 74 | 264  | CTGTATTCATTAGTCAATGGAGTATTTGAACCTGGGATTTACCTGGCTTTGAAATAC   | 24586 | A_95_P104342 CV016956     |
| 25235 | 297 | 75 | 432  | TATGGGTAGAGGAGGAGAAGAAATGATTAGGCCTCTGCAAAGTATATGAGAAGT      | 24588 | A_95_P139057 FG161784     |
| 25238 | 297 | 78 | 1295 | GACGAAGACTATGTAGAACCATATATTCTAATTTATGGTAGGTGACAGTCAATTTG    | 24593 | A_95_P183197 TA13403_4097 |
| 25242 | 297 | 82 | 145  | CCACTTGTGAGGATATTTGGAAGTTGATGAGATCTTTCGAAGACATGTTATGAAGTA   | 24601 | A_95_P158437 EH616390     |

|       |     |    |      |                                                              |       |                           |
|-------|-----|----|------|--------------------------------------------------------------|-------|---------------------------|
| 25243 | 297 | 83 | 0    | GCAAAAAGTATTCTTATGGTTACTCTCTCCACATAGCAATAGATTTTGTCCATCTTCTCT | 24603 | A_95_P017311 A_95_P017311 |
| 25244 | 297 | 84 | 255  | GTTCTACTGTACTGATATGTCATTTGTTGTTATGAGATGGTTGGAGTTTATGCCTTATC  | 24605 | A_95_P133187 EB434452     |
| 25246 | 298 | 1  | 417  | CAGAGGAATGTAATGCTTTTAAAATTTTATGATTGAGCCTAGCATATCTGCCGTTT     | 24443 | A_95_P204097 EH618725     |
| 25249 | 298 | 4  | 409  | CTGCTGTTAGAAAAGGGAACAAGAAGCAAGTAAAGGATGAGTTGGATCGGATTA       | 24448 | A_95_P125957 TA17381_4097 |
| 25251 | 298 | 6  | 573  | TCCCTCCGATTGTGAGAAAAGTTTGTTTTACAGTTGCAGTTGATTTGTTACTCATTGT   | 24452 | A_95_P287333 FG642723     |
| 25252 | 298 | 7  | 861  | CAAACCTCTGTGATATGGGATCTGCTTTTTCATTTACTTCTGTTTATCTCGACAAACATG | 24454 | A_95_P226969 EB443281     |
| 25253 | 298 | 8  | 342  | CCAATCATTGAAAATTGGTCAAGGTGTTAGGCCCTTTTATAATTAGGTCAACAAAA     | 24456 | A_95_P175177 EH666023     |
| 25254 | 298 | 9  | 527  | CTATTGAGCACATGGATGGACTGTTTGTGATCTTTGCTGGGAGGAAGTTCACTCAGT    | 24458 | A_95_P040731 BP129906     |
| 25256 | 298 | 11 | 1189 | AGCTGTTGCACAGACTGTAACCTTCACTTTATGATCTTACTGTGGTGGAGTGTGTTGG   | 24461 | A_95_P028126 TA19612_4097 |
| 25258 | 298 | 13 | 579  | CCGGTAGCCATGGTATGGACATCATGTTGCCAGTCAAAAATATGTCGCTACTAACG     | 24465 | A_95_P148812 EB678352     |
| 25260 | 298 | 15 | 817  | ATATGCTGTGACTCCATTATTGGAAGATGCTCTAATGGACAGAGATCTCGTGACAG     | 24469 | A_95_P015561 EB425326     |
| 25262 | 298 | 17 | 838  | ACGTTGTGGATCTGTATTTACAAAGTTCTCTGGAATGAAGTGAATGAAGATTTACCG    | 24473 | A_95_P002476 EB450385     |
| 25263 | 298 | 18 | 384  | GTCTGATTATGGTTAGTCTTACCTGAACTGGAAATGTTTTGGTATTTTGTACCAACC    | 24475 | A_95_P025206 FG644421     |
| 25266 | 298 | 21 | 836  | ACAGTTGCTATTGATGACATTGATATATCTGCTGGCAATCAAAGTTCAGCTGCCCGG    | 24481 | A_95_P015946 TA17991_4097 |
| 25269 | 298 | 24 | 389  | ATCGACTTTGTACGCTCCTGTGAAGATCTTCTAACTGAATTAATTGACTGCTAACTT    | 24487 | A_95_P212087 TA19754_4097 |
| 25275 | 298 | 30 | 778  | TCAAGGAACTAGGAATACAAGATTATCTGTTAGATGCACACCCCATCCTGTGAATAT    | 24499 | A_95_P126912 EB426301     |
| 25279 | 298 | 34 | 373  | GAGAAGCTAATAATTACAAGGGAGTTGGATTGGCCAGAGCAGGTGCTGGTGGTATA     | 24507 | A_95_P108872 DV162343     |
| 25280 | 298 | 35 | 1466 | CAGTTTGTATGCTGCTGATGTTATGAATTTCTCTGTATGAGTTTTCTCCTGGATC      | 24509 | A_95_P194442 TA15896_4097 |
| 25286 | 298 | 41 | 589  | GGTTTCCAGATGATTAATGGAACTGATTGTTCTATGTATTGACATGAACTGAAGT      | 24521 | A_95_P001461 FG636182     |
| 25288 | 298 | 43 | 458  | GTAAGAACTATTATTGGATGGTGTGTATGAGACTTCAAAGCAGATATGTTAGTGC      | 24525 | A_95_P065355 BP136308     |
| 25289 | 298 | 44 | 484  | GAAAGAAAAATCTCTATTTGATAAGGCTTCTTCTATACCTATGAATTCCATTGGAC     | 24527 | A_95_P277173 AM808541     |
| 25290 | 298 | 45 | 98   | GCAATATTGCTTACAAGAGAAAATAGAAAAGGATGACTCTGCAACTGTCACATCTTG    | 24529 | A_95_P004146 EB682832     |
| 25292 | 298 | 47 | 1110 | CGGCATGTTAGCAGATATGGAAGTGTGTTGAATTGGCATGTTATTTGCTATCTAC      | 24533 | A_95_P022236 TA18105_4097 |
| 25294 | 298 | 49 | 761  | CAAGTCATGTGGTTATGACATCTTCTTAAAAAGCATTTTTGAACCTTCATAGGGACT    | 24537 | A_95_P286368 EH623686     |
| 25298 | 298 | 53 | 575  | GCCACTGGATGGAAAAATTAGATTAGTGACATCAACATCAAAGATGTGTAACCATTT    | 24545 | A_95_P020796 BP133356     |
| 25301 | 298 | 56 | 180  | CTAAAAAAGGGATCTGAAAGTACAAGAACCAAAATACCAATTTGACCAAAACCATCAC   | 24551 | A_95_P155897 EG650320     |
| 25305 | 298 | 60 | 241  | AAACAGATCGTGGACGAGCCAAAAACAGGGTCAAATCATTCCGATTTCAAGCGATC     | 24559 | A_95_P080590 BP528041     |
| 25310 | 298 | 65 | 755  | TGGTTTTGTTAATGCAGATTGAGGAAATACCATATCAATGATCTGGTTCGACAGTTG    | 24569 | A_95_P234269 DW000116     |
| 25314 | 298 | 69 | 490  | ATATCAGCTTCTGGAGTTTGAATGCTGCTGCCATGTTAGATTGCTCCAAAATCCATT    | 24577 | A_95_P122892 DW005219     |
| 25315 | 298 | 70 | 782  | GCCTTCTCTACTACAAGATCATCTACTAATTTGCACCCCTTAAAGATGTAAGAAA      | 24579 | A_95_P207067 EB451448     |
| 25316 | 298 | 71 | 417  | GAGTTAGGAGCACGTAAGCGTGAATTGGGTGAGGTAAAGTAGTTAAAGAGCAGTA      | 24581 | A_95_P069220 BP137324     |
| 25322 | 298 | 77 | 647  | GACATGATCAACTCTCTATTTGCTATGGAGATTAAGTGGTTGAATACCCTAGA        | 24592 | A_95_P233824 FG637726     |
| 25327 | 298 | 82 | 202  | GGAGACGAGCTGTATCATTGGAGTAGCTGATTGGTGTTCATTTTTGAAGAGGAAA      | 24602 | A_95_P034948 BJ999183     |
| 25332 | 299 | 2  | 535  | TGGGGCACTGAAGGCTCTGTTATTCATAACAATCACTTGAATCGTGAAAAAGAAAAT    | 24610 | A_95_P134852 EB437708     |



|       |     |    |      |                                                             |       |                           |
|-------|-----|----|------|-------------------------------------------------------------|-------|---------------------------|
| 25333 | 299 | 3  | 551  | AGACGGTACTAAATGCAGCTAAGAATTACAAAGGATCCTGTGAAAATGACTTGACCT   | 24612 | A_95_P085565 FG637100     |
| 25335 | 299 | 5  | 626  | CAGAGTTTGCAGCAGAAAACCTGAATAAGAACATTATGGACGAGCTAGTAACGAGG    | 24616 | A_95_P139002 EB442706     |
| 25343 | 299 | 13 | 476  | TACTCACATTTTGAACATCAAAGTAAATTTCCGGTATCTCATGAAAGTCGGGACAA/   | 24631 | A_95_P096998 FS413263     |
| 25344 | 299 | 14 | 550  | CTCCCTTACTCTGGGTATTCAAACCTTCTATGGATATTTGATGATATTTCAAGTCAGTA | 24633 | A_95_P100958 TA13431_4097 |
| 25346 | 299 | 16 | 56   | TTTCCTAATGTACTCCACCTCTGATGTTCTTGAAGGTAAAAAATAGCCTTTTCTACTGT | 24637 | A_95_P256284 EH622397     |
| 25352 | 299 | 22 | 948  | GTCCAGAGTTGCTAGATTTGGACCGTCTGCTGTATGTATCTAGTCTTATAAGGGTGAC  | 24649 | A_95_P224397 EB449435     |
| 25354 | 299 | 24 | 776  | CTTGTGCTGAGAGAAAATTGACAGAGGATGAAAGTACAGCTTTGGCAAAGAGGGAT    | 24653 | A_95_P201417 EU294213     |
| 25355 | 299 | 25 | 539  | TCTATTATTGGTGGTCTTGAATTTCTGTTTTGAAGCAAAGCTTAAACTGACCATGCC/  | 24655 | A_95_P024076 FS438234     |
| 25359 | 299 | 29 | 859  | TTATCAGTCGAATGCAAGTTCACACAATGTCAAAGCATCTCACGGACCTTTCCAC     | 24663 | A_95_P204257 EB425796     |
| 25360 | 299 | 30 | 410  | AAGCTACCAGATGAGTAATTACTACTTCTGCTTGATACGAAATGACGATATCATCCCC  | 24665 | A_95_P031321 TC75821      |
| 25366 | 299 | 36 | 243  | TTCTCTGAGCTTTGGACTAATGGAAAAAATAACAGATGGATGATCTAACAAGTAGCC   | 24677 | A_95_P129782 EB429741     |
| 25369 | 299 | 39 | 1544 | CGTGAAAATATGAATGGTTAATGCTTCATGTATGTGTTTTAGTGTACTGTCGGTGGTT  | 24683 | A_95_P115242 DQ813657     |
| 25375 | 299 | 45 | 982  | GTTACGTCTAGGTAGATGATGCATTGTAAAGTGGTGGTTATTGAAAGTTGATAGTGT   | 24695 | A_95_P016561 TA15470_4097 |
| 25377 | 299 | 47 | 714  | GCTTGCAATTCTGAACACTCCACTGACTGTTTCTTACCTATTCCTGGACTTTTTCAGC/ | 24699 | A_95_P200087 DW000878     |
| 25378 | 299 | 48 | 647  | TGGTGTATTCATGTCGATGGTTTAGTAGCTATTAGTGTCCGATTGGCGCACAGTTGA/  | 24701 | A_95_P056981 BP134099     |
| 25381 | 299 | 51 | 535  | CCTGTTTCCCGTCTCCTTTAAACGTTGTCTTTTCAGTTTCTATAAAACATGTGAAAAAG | 24707 | A_95_P018446 EH617796     |
| 25382 | 299 | 52 | 693  | TGCTAGTGTGGAATTTTAGCGAGCCACCTCAAATGCTGGACAAGATTGCCATTC/     | 24709 | A_95_P305363 FG193269     |
| 25383 | 299 | 53 | 521  | GTGAACTCCAAGTTGTAGATTTGGTGAAGGAAAAAGTGAAGTACTTCTTATTCCGTA/  | 24711 | A_95_P088523 BP530106     |
| 25384 | 299 | 54 | 1202 | GAATAACTTGGGAATAAATGAGGCTGCAAGGCCATGTACCATTGATTTAGGCTTTCC   | 24713 | A_95_P186882 TA14223_4097 |
| 25387 | 299 | 57 | 749  | GGCCTAATAGTGTATTAGAAGTTCTACTAATTAATTTCCAGGGGTGTACTTTATGG    | 24719 | A_95_P116428 DV159134     |
| 25388 | 299 | 58 | 749  | TAACCTAACTGAGGTTCCAAGTCTGCAATCAGATTAGTCAGTTTCTCGCAATCCGCT   | 24721 | A_95_P229409 DV160447     |
| 25395 | 299 | 65 | 519  | CCATTAATATATTGTGCTGTTGCACCGACTATTTTGGCAGGTCAAATTGATCCCGTTCT | 24735 | A_95_P156342 EH622808     |
| 25401 | 299 | 71 | 767  | CAGTGTGTGAGTTGTACTAGTTTTTGCACACAACATTAACCGTAATAAAACATAGT    | 24747 | A_95_P000476 EB439640     |
| 25403 | 299 | 73 | 629  | TACCTGTACGTGGAGTCTATGTACTATTCTAAGTTTTACATTACAGAAATTGTTGG/   | 24751 | A_95_P273706 FG636077     |
| 25405 | 299 | 75 | 310  | TGAACGCTTTGATTATCATCACTGGTTTTGTTATTGCATAGTGTGTTTGCTTAAGGTG/ | 24755 | A_95_P026576 TA12722_4097 |
| 25408 | 299 | 78 | 489  | ATTGAACTAAAAGTACTGCTTGTGTCGTTACTGTTTCTTTTGCATCTTTCTTGT/     | 24761 | A_95_P209262 TA19151_4097 |
| 25409 | 299 | 79 | 861  | AGAAATTCTGGCTTCTGTACTTCTAAGGAGCTTGAGTGAAGTCAACCATGTCTAGCT   | 24763 | A_95_P230404 EB678974     |
| 25411 | 299 | 81 | 415  | GAAGATACCTCTACTGTAAGGATTTGCCTGCCTATAATCTATTGAGGAGATAATGT/   | 24767 | A_95_P076245 BP526933     |
| 25412 | 299 | 82 | 230  | GTTTTGCATCTTGATTGAATGTAAGTTTTTGTATCCAACTGCAGATCAGCAGTTCAAAC | 24769 | A_95_P177157 TA11896_4097 |
| 25414 | 299 | 84 | 513  | AGAAATGGTGACAGCAACTCCATGCAGCCACATGTTCCATGAAGATTGTATTGTTCC/  | 24773 | A_95_P124462 EB451554     |
| 25422 | 300 | 7  | 498  | GTAGTAATCAGAGTAGTCTCTTGATATTTTCGTCAGTTTCATAAAAAGAGTGCCAAC   | 24621 | A_95_P297763 FG642661     |
| 25428 | 300 | 13 | 915  | GTAGATGCTGGCACTTTGTTAATTTCAAGTAAACAGTTTATCTCTGTGTGAAATGTG   | 24632 | A_95_P200607 TA17242_4097 |
| 25431 | 300 | 16 | 777  | TCTTATCTATCTGATGGCCAAATGATAAGATTCAAGCTGTAATCGAGGCGGTGTCTG/  | 24638 | A_95_P253884 FG146936     |
| 25438 | 300 | 23 | 531  | ATTTGTTAGGGACCACAATCATCCCTTGGTTATATCACCTTCCAAGAGACGTCCAAC   | 24652 | A_95_P045641 FS403398     |

|       |     |    |      |                                                             |       |                           |
|-------|-----|----|------|-------------------------------------------------------------|-------|---------------------------|
| 25440 | 300 | 25 | 271  | AGCATTTCATCCATCGAACAAAATAGGAGGAGGTGGTTTTGGATTTGTTTTATAAGC   | 24656 | A_95_P162537 EH621481     |
| 25441 | 300 | 26 | 1524 | CAAAAAACAAAATATTTTCATTGAGAACATCTGGTTGGTTATGTCAGCCTCAATTTGCG | 24658 | A_95_P183932 TA13572_4097 |
| 25443 | 300 | 28 | 512  | GCATATGAGAGTTCTGATGATGATGACTGATTTTGCTAGGATTTATTTGTCTATGATG  | 24662 | A_95_P309273 FG645425     |
| 25446 | 300 | 31 | 800  | TTCCCGGAGAGTTTAACTGTTGGATTTGAACCATAATCGGATTTTTGGTAGATTAC    | 24668 | A_95_P126117 EB425603     |
| 25449 | 300 | 34 | 778  | GGTGTGAACTGGATTGACAAATCTTGATGAGATGACACTTCTATTGTTCACTATCAA   | 24674 | A_95_P162822 EH621820     |
| 25450 | 300 | 35 | 942  | TATGGAATATGTCGGTAAAATGGATGATGCACCTCGTCAGTACTCTGCCCTTGACCA   | 24676 | A_95_P118272 DV161275     |
| 25454 | 300 | 39 | 467  | GCTATGGCTTCTAGAGTTGCAGCCTTTTGAAAAGATACTATTCCCTCCGTTTCAATTTA | 24684 | A_95_P295618 FG635525     |
| 25457 | 300 | 42 | 712  | AAAGCTTTGTATACCCTGAATCTTCTGTTCTATCGAAATCTTAAGCTTCAACAGGTTCA | 24690 | A_95_P298263 FG638800     |
| 25458 | 300 | 43 | 730  | ATCCCTTTTGGAAATCAAGTTCTGCAGAACTTCTTAGAATAGCTCGATTTGAGCGT    | 24692 | A_95_P184737 TA13762_4097 |
| 25460 | 300 | 45 | 411  | CATAAGAAAAGCGAAGCCTCTAACAGTTGATGTATATTCGTTGTTGACAGAGAAA     | 24696 | A_95_P119407 DV162609     |
| 25461 | 300 | 46 | 366  | AGCAAAAATTTGGAGCAGGCCATCAGTTACTACGAGAAGGGAGCTGATCTTTAACA    | 24698 | A_95_P106677 CV018003     |
| 25466 | 300 | 51 | 371  | AGGTTTAACCCGATTGATTTGCAATTTTAGCTTTGAAGCAATAAAGGTCCGATTTTC   | 24708 | A_95_P108112 CV018674     |
| 25468 | 300 | 53 | 707  | TTGTGGACAGGATGATTTATTGAAGATCATGGACTATTCCCTCACTCCCCATTTTGGC  | 24712 | A_95_P294018 DV161190     |
| 25472 | 300 | 57 | 1443 | GGTGATTCACAAATCTCAAGTATAGGTGTAGTTCAGACATTTCTTTGATCTTTGAGTA  | 24720 | A_95_P023271 TA17973_4097 |
| 25475 | 300 | 60 | 779  | CAAAACGAAAGCTGGTCAAGACTTAAGCACATGCTCCTCCTTACAGTAGTTGTGATG   | 24726 | A_95_P163742 EH622823     |
| 25483 | 300 | 68 | 300  | ATGTTTGTGGCTGATGGTGGTGAATGTCTTGCAGCTCAGAGTTATGCCAAAACATG    | 24742 | A_95_P027606 EB424783     |
| 25485 | 300 | 70 | 779  | TGTGAATTTGGATATGTTTGGCAATCATCCTGCATACCGTACTTCCAGTACATGCTA   | 24746 | A_95_P138552 DV161442     |
| 25486 | 300 | 71 | 958  | ACCTGATGTATGCCAAGTCATCCATATTTTCTGAACTTAAATCATAGATCAATGACA   | 24748 | A_95_P186062 TA14046_4097 |
| 25487 | 300 | 72 | 799  | ATTCTCCTAGATTTGCTGTCTAGGATTTTGTAACTGATTAGGCTGACATTGGCTAC    | 24750 | A_95_P265641 EB448253     |
| 25488 | 300 | 73 | 447  | TGTAATTTCATATACAAGTTCCTCCCTCGTAACAGGGCACATCTTGCATATACTATTT  | 24752 | A_95_P163982 TA13652_4097 |
| 25495 | 300 | 80 | 615  | TTTCTCTTCATGGTCGCTAATTTGATTCACACTCGCCATTTATAGTGGCAGCTTTGGAC | 24766 | A_95_P047846 BP131760     |
| 25497 | 300 | 82 | 887  | AGCGTACTTGTGCCGTAAGATTATGCTGATGGAGGGTTCAAGATGTTCTCTCTTGC    | 24770 | A_95_P247507 DV998989     |
| 25500 | 300 | 85 | 827  | GTATGTACCTAAGCATTATCACTTGGGTATAATGTATTATTTGTTGCCTTATCAGACG  | 24776 | A_95_P221447 TA21821_4097 |
| 25502 | 301 | 2  | 445  | AAAGCCAATGATGTGTACGATAGGCTTCGAGCACCATTGGGTAATCTATTCTTTGG    | 24779 | A_95_P117092 TA14500_4097 |
| 25505 | 301 | 5  | 0    | TGGGTATCAGACTGGTCTACCTACATATGGCACAGCAAGCGAGCATCTTTTGTACTTA  | 24785 | A_95_P283738 A_95_P283738 |
| 25508 | 301 | 8  | 1212 | ACGAAAGCATATACAGAATTTGAATGTGGATACAGTTGGTGTGGCGTAATGGGCTT    | 24791 | A_95_P014356 TA18071_4097 |
| 25509 | 301 | 9  | 942  | CCCTCTGCCTTTGGAATTTAATTTGTTCAAATGAACTGTTATGTATTCTTAGTTCAA   | 24793 | A_95_P214582 TA20292_4097 |
| 25513 | 301 | 13 | 362  | AAATTTCTGGACAATGGCGAATATGTACAATTACTATTACCTGGAATGGGGCGTGTG   | 24801 | A_95_P114237 CV021512     |
| 25514 | 301 | 14 | 830  | CAATTTCTATTTATGAGTCCCAGTTTTGTTTTGGGAAGCACTTGTAGGTTGTATAATC  | 24803 | A_95_P120302 DW000090     |
| 25515 | 301 | 15 | 718  | TTGAAGATGAAATCCTGTGATAGCTGATCTCCGTTTTCTTGATCTATAATTGGAAAT   | 24805 | A_95_P190927 TA15118_4097 |
| 25517 | 301 | 17 | 188  | CTTGGACAATGCAATTCAGAAAGCTAGGTGTTCAAGTGTGTTTCAATTTGTTTATCT   | 24809 | A_95_P132922 EB433719     |
| 25519 | 301 | 19 | 449  | AGCTGCGTGTATAAACAGAGGAACTTGTGATTTTTTCTGTCTCTGACTTTTAGATCT   | 24813 | A_95_P197932 TA16670_4097 |
| 25520 | 301 | 20 | 122  | CGTATTGATGGATGCAATGTTGTAACCTATAGTGCCCTTAATGCTCTCGTGTATTAT   | 24815 | A_95_P103012 CV016296     |
| 25522 | 301 | 22 | 453  | TGAATATGACCCTGTTTACTTAAGTTGATCCTGCTGGGTTGAACTTTATTCTTACTGTT | 24819 | A_95_P178262 TA12197_4097 |

|       |     |    |      |                                                             |       |                           |
|-------|-----|----|------|-------------------------------------------------------------|-------|---------------------------|
| 25523 | 301 | 23 | 474  | ACTTACCAAAGAGAACTTGGAGTAACTGTTGCAATGTTAAACCATGAGGGATTC      | 24821 | A_95_P073130 BP526138     |
| 25525 | 301 | 25 | 2212 | GATGGTTGTAAGTGCTGAAGACAGTATTAAGCTTATGGAAATTATGCTTTAACTCA(   | 24825 | A_95_P009111 AY248907     |
| 25526 | 301 | 26 | 395  | CAGAAGACCAATATCGGGTTCACAGCTAGAGTAGATGCAAAAATTAGGCAGTTGAG,   | 24827 | A_95_P083680 BP528826     |
| 25527 | 301 | 27 | 514  | ACATTTTCCCAAAGCCTTCAAAAATGTGAACAAAGCTACTACTACAATGTCAGTAGGC  | 24829 | A_95_P191147 EB439763     |
| 25529 | 301 | 29 | 824  | ACACAAAGTTAGAGGAAAAGCACAAAGCTCTGGAGGCAGAGAAAACAAGAAATATGC/  | 24833 | A_95_P011601 TA16021_4097 |
| 25534 | 301 | 34 | 2592 | GTAGCCAAAGCTGTGTGATATATTTTAGCATCTATATGCTATGGCTTAAGAATAAAC   | 24842 | A_95_P007316 AY248904     |
| 25536 | 301 | 36 | 760  | CAAGCTAACTTGAGCTTTAATGGCCATCAGTTGCTGCTGCTACTACTGCATGTTTGTG  | 24846 | A_95_P147452 EB424659     |
| 25539 | 301 | 39 | 886  | ATATATGGCAGAGCCTCATTAGTTTGATTGATGTGAGGGACTGCTGCAGTACTCGAA   | 24852 | A_95_P025446 EB450890     |
| 25540 | 301 | 40 | 341  | CGTAATTTTCAACATGTTTTTAACGATGATAGTCGTGTAAGTTTGGTGCAGTTCAAGG  | 24854 | A_95_P002896 FG198048     |
| 25553 | 301 | 53 | 985  | GTTGTCCCGAAATTGGTGTGGCTTTTATCTGGGAAAAGTCTATTTTCTTGGTTCATA/  | 24879 | A_95_P200277 TA17174_4097 |
| 25557 | 301 | 57 | 828  | CATTTGGGTCTCTTCTCATGTTATGGATGCATCTATGGAAGATCTTGCTCGTTGCCCT  | 24887 | A_95_P150017 EB680066     |
| 25558 | 301 | 58 | 522  | TTGGTCTTTTCATGGAATGTGTTGCTATTTGTGACTTTTAGAAGGGTCTTTGCTGATC  | 24889 | A_95_P231594 FS408551     |
| 25560 | 301 | 60 | 1196 | CTTTGTGTCCTTTAATTCAGACATCTTTGGAAGGCACTCTGTAAATTCATGTTCAAA   | 24893 | A_95_P010701 TA17132_4097 |
| 25570 | 301 | 70 | 641  | CATCAGATTTGAAGAATAAAGTTGCGATTGAGAATTTATACCTAAGCGATATCACTTC  | 24912 | A_95_P249957 EX465326     |
| 25571 | 301 | 71 | 644  | TATGTCAAAGTTTCATGTGATGATGAAGAAGAACGAGCGAGCCGTAGGATGTACAG    | 24914 | A_95_P116392 DV159096     |
| 25573 | 301 | 73 | 788  | AGAGGGATAGTCCCATGATGCACATCAGCAGAGTCTAGACCGAATTTGTATTATAA    | 24917 | A_95_P303963 FG136199     |
| 25574 | 301 | 74 | 350  | CTCTTGATATGATGGTGATTAAGAGTATTGATTAGTGAATCTTCAAATGTATCCCC    | 24919 | A_95_P301508 FG638239     |
| 25576 | 301 | 76 | 675  | ATTCCATCAACCATTGAGGAAGAATTGGAGACTAACCCATTCATGCGGGCTGATCTTC  | 24923 | A_95_P189827 DW005092     |
| 25577 | 301 | 77 | 593  | GGTATTGATGGAGCAAGTGAATTTGGTTCTTGATACACTTTTGGGTCAAATAATTTAT  | 24925 | A_95_P178367 TA12230_4097 |
| 25578 | 301 | 78 | 697  | GGGTGGGGTTTTCTGTTGTTTGAATACACTAAAGTCAATTCCTTTTGGCAATTTGA'   | 24927 | A_95_P152912 EB683240     |
| 25582 | 301 | 82 | 767  | CAAGATATACTGAAAGGTGGTACATGGAATGCATGTTGCTGCATCTTGAATTCCTCTT  | 24935 | A_95_P163442 EH622490     |
| 25584 | 301 | 84 | 405  | GTCTGTTATTCATGAAATAACATCAGCGCTCGGGATATACTGTTTCAGGATTACAAGC  | 24939 | A_95_P087588 BP529831     |
| 25585 | 301 | 85 | 529  | TCTTTTGCATCCAAGCCAATTTTGTAGTTTGATCACGCCAACTATGCCTTATAAAAAA  | 24941 | A_95_P153882 EB684060     |
| 25587 | 302 | 2  | 1040 | TCAGTGTCTCTGTGAATTGACCTTGGGTATTATGTTTGCTGTCTGTTATTTAAGACA/  | 24780 | A_95_P018546 TA12116_4097 |
| 25588 | 302 | 3  | 842  | CCAACCTTCAAGGACAACGGGTTTTTGTAAAATGCCACTGTATCATTTTTCTTAACTT  | 24782 | A_95_P010921 DV158142     |
| 25592 | 302 | 7  | 597  | TGGTGTGAGGTTCTGTCAATCCCTGTTGCAAAAACATTTAATATGTGATCAGTATT/   | 24790 | A_95_P177622 TA12024_4097 |
| 25593 | 302 | 8  | 566  | TGTTCTGCAATTTTGCCTGCTGACTGGTCTATTATTGTATGTAAGCAGTTCCTTCTTT  | 24792 | A_95_P124282 DW004137     |
| 25595 | 302 | 10 | 137  | TTTGAAATCGTGATTGAGATACTGTCCGAGTCTGAGGTTGTTTCGTTGAGGTTTCCGC  | 24796 | A_95_P095113 BP533028     |
| 25597 | 302 | 12 | 696  | AGAACAATAGTTGAACATTCATCTGAAGGAAGAAAATTTAAGGTCTTTGCGTGAT     | 24800 | A_95_P118002 DV159892     |
| 25600 | 302 | 15 | 444  | GAAGACGCTTACCCCGTTGGGGATGATGCGTAGTCTTGGTTTGTATTTTCTTTTGCCT, | 24806 | A_95_P281193 AM837768     |
| 25605 | 302 | 20 | 686  | TGTATTACTGGGCTTCCATCAAGGAAGTAAATTTAATGTTACATTTTACAGAGAC     | 24816 | A_95_P191152 EB439763     |
| 25607 | 302 | 22 | 425  | CCTTCTAATGTCAAGGAAGAAAAGGAAGGAGACAGAAAAGACACAGCAGAGCTGGTG   | 24820 | A_95_P122022 DW002091     |
| 25612 | 302 | 27 | 508  | TTCTGTGAGTCTCGGATTTCAACAGCTGGTTTCTTTTCAAGCTCGTTGCCAAGTTTT   | 24830 | A_95_P056541 BP133984     |
| 25614 | 302 | 29 | 216  | TATGCAGCTGAACTAAGCATTAGTTTCTTTCAATTGATGTATTGCTTATGTATTGCTC  | 24834 | A_95_P107612 CV018462     |

|       |     |    |      |                                                             |       |                           |
|-------|-----|----|------|-------------------------------------------------------------|-------|---------------------------|
| 25615 | 302 | 30 | 274  | ATCCCAATATACATTTTCTTAGATTAGAGAATGGTCATACCCCTCCTCCCCTTCCGTTT | 24836 | A_95_P131447 EB431733     |
| 25616 | 302 | 31 | 816  | CACAAATCGTAGGCTTCTCTGTTATCTTTCTAATCTATATCTGTGTCCATCAGTTCTC  | 24837 | A_95_P145352 EB449040     |
| 25617 | 302 | 32 | 677  | GAACHTTAAAAATCCAGGATTGTAGGTTGTAAGTGAAGCAGAGTTTTACCGGATTTG   | 24839 | A_95_P214422 TA20260_4097 |
| 25620 | 302 | 35 | 471  | AATATATTGGTCCGGACAGTCTCAAGTTACTCTGGCAACCATAATTGGAGCCATAG    | 24845 | A_95_P086490 BP529548     |
| 25623 | 302 | 38 | 635  | GTGATGGAATATGTTAGGGGTTGAGTTTGTACTTGTATTACTTGATTGAGAAACAT    | 24851 | A_95_P263291 FG644493     |
| 25624 | 302 | 39 | 612  | AATGGCCATTTTGAGCTGAATGTTTTCAAGCCTATGATTGCTAATGCCCTTCTACATT  | 24853 | A_95_P128387 TA18092_4097 |
| 25626 | 302 | 41 | 431  | TCCTAATCAAACGGTGTGGCTAAAATGGAGAAGATCCTTGGTGTAAACTTAGAGG     | 24857 | A_95_P092958 FG642155     |
| 25629 | 302 | 44 | 500  | CTAGGTGTTAGTACTGGTGATAATCTTGATAGCGGAAACCAGAGGTCTTTTGAAAC    | 24862 | A_95_P105517 CV017494     |
| 25634 | 302 | 49 | 1229 | GGGTAATAATTTAGTAACTGCTCTTTGACTATTGAGAGCTTGATGCCTTACATTGT    | 24872 | A_95_P201712 TA17482_4097 |
| 25638 | 302 | 53 | 809  | GATGGAGATACTGACCTCTATGTTTCTAACATCCATACTGTTCTCACACAGCACCAG   | 24880 | A_95_P286878 FG136839     |
| 25641 | 302 | 56 | 301  | GTGACACATCTCAAAGAATTCTTAAATGCTTTTTACTAGTAAAGCTACTTTGCCCTT   | 24886 | A_95_P244452 TA12980_4097 |
| 25644 | 302 | 59 | 740  | CTGAGACCTGTAAGAGAAGTGAACAATCTTATTTTTGTTGGTATTTGAACTACTCTT   | 24892 | A_95_P220012 TA21517_4097 |
| 25647 | 302 | 62 | 221  | GTTTGCCTTAATTGCTTTGACTACTTGTCTTACTACTATCATAAAGTCACTTTTCGT   | 24897 | A_95_P137637 EB441370     |
| 25650 | 302 | 65 | 1181 | CACTAAATAGTTCCTGGATGATTATCGCACTATGAATGTTACATTGTAGTTCTGATTG  | 24903 | A_95_P201242 TA17381_4097 |
| 25651 | 302 | 66 | 1234 | CCAAAGTTAACTGTTGGAAGATGATATTGTAGCTCTGAAGTGTATAATCTGATCTTCT  | 24905 | A_95_P197577 TA16594_4097 |
| 25653 | 302 | 68 | 798  | CTCTATTCAGTCACCAATTTAGGGAATGCATCTAATTGATCAGATGCAAGAAATTTG   | 24909 | A_95_P125792 EB424890     |
| 25655 | 302 | 70 | 846  | ATGGTGAGAGGATTGGCAGGATGTTTGGTCCACTATCTCGACTGAAAGATGTGATTC   | 24913 | A_95_P227199 EB424654     |
| 25665 | 302 | 80 | 2011 | GAACHTTGATCTTTGTAGCAAATGATGCATGGGAGATATCCATATACTCTTCCACAA   | 24932 | A_95_P245277 AM746200     |
| 25668 | 302 | 83 | 998  | TCTTGCTAAATCGAAATGTTGAGGGTTTACTCATTTGATGAATTCTCAAAGAGGCG    | 24938 | A_95_P226604 TC46839      |
| 25670 | 302 | 85 | 580  | AATGAGGGGAAGACTATGGATCTCCACCAATGAGCTGTAGTTGTTGAATTTATTTA    | 24942 | A_95_P196332 EB428726     |
| 25671 | 303 | 1  | 866  | CATTGTGTCCTGTTCAATTTTTGAGTATTCAGCTACACAACAATCTGGTAGTAAAGTA  | 24943 | A_95_P177892 TA12097_4097 |
| 25674 | 303 | 4  | 181  | CTCTGATGCGGGAGAATCACACTGGGTTTATGGAATTAGTTTTAGCTATGAAAAAA    | 24949 | A_95_P138097 EB441814     |
| 25677 | 303 | 7  | 292  | TGTATGGCCAACGTCTTACCTTCGTCATAAAAGTTTATCTGTTGAATCCTAAATTTGA  | 24954 | A_95_P218097 TA21097_4097 |
| 25682 | 303 | 12 | 1073 | TCTTGAAGGTTGGTGAAGCTGAGAAGAATTTGGGCCGGACAGCGGATGTAAATCTT    | 24964 | A_95_P017846 TA17945_4097 |
| 25686 | 303 | 16 | 589  | GGTCTGCTTTATGCCTCAAAGTTTAGGTTTAAAAACTTGTGCATGTTGGTAAATC     | 24972 | A_95_P122657 DW002636     |
| 25691 | 303 | 21 | 162  | CTACTAACTAAGTTTTATCTCTCAGAGCCTCCTGAATGTGAAATATTTCTGAGATT    | 24982 | A_95_P080265 BP527962     |
| 25693 | 303 | 23 | 805  | TTTCCCCTTCTACTACCTGCCATAAAGCAGCTGTATTTTTAATAAGAAAAGTTGCAA   | 24986 | A_95_P126662 TA16490_4097 |
| 25695 | 303 | 25 | 426  | CAAGCGATTTCTGCTCTTAAGGTACATGCTACCGTACTCGAACAGAGGAACCAAAA    | 24990 | A_95_P128407 DW000208     |
| 25696 | 303 | 26 | 865  | TTTGATCGAGTGACAGTAGTCTGAGATATGCTGATCTGATCTCTACTCCCTCTGGG    | 24992 | A_95_P235934 FG159665     |
| 25698 | 303 | 28 | 520  | CAAGAGACTTGTTAGGTTGAAACCACCAACAGAGTTCTGATGAAGATTCCCCCATC    | 24996 | A_95_P098388 BP534452     |
| 25699 | 303 | 29 | 844  | GTACATTTTCAACATATTCCTTTTTTCTAGGAGCCAGGTAGTTACCTGTAGTTTCTGC  | 24998 | A_95_P294473 EB682884     |
| 25700 | 303 | 30 | 752  | GTCATCTACGCTCCTAGTTATGTCTTAAAGAACGTAGGGTTATCTGTGTTTTACTA    | 25000 | A_95_P217942 TA21058_4097 |
| 25702 | 303 | 32 | 226  | CCATGTGCTTCGAATGCTGGTCTCCTAATTTTTGAAGGAGATATTATTCTGATTCAT   | 25004 | A_95_P261331 BP131668     |
| 25703 | 303 | 33 | 814  | TGCTACACTATTGTGAAGAAAAAAGTTAGTGATATGCTGGCCCTACTATATCCTATTG  | 25006 | A_95_P195392 DV157600     |

|       |     |    |      |     |       |              |              |
|-------|-----|----|------|-----|-------|--------------|--------------|
| 25706 | 303 | 36 | 333  | GA  | 25012 | A_95_P017591 | EB425819     |
| 25707 | 303 | 37 | 781  | AA  | 25014 | A_95_P310258 | FG145186     |
| 25710 | 303 | 40 | 485  | CG  | 25020 | A_95_P098053 | BP534310     |
| 25712 | 303 | 42 | 454  | TG  | 25024 | A_95_P202317 | FG642455     |
| 25713 | 303 | 43 | 554  | GCT | 25026 | A_95_P033769 | AJ632965     |
| 25714 | 303 | 44 | 229  | CTT | 25028 | A_95_P108272 | CV018762     |
| 25716 | 303 | 46 | 687  | AT  | 25032 | A_95_P117697 | DV160624     |
| 25717 | 303 | 47 | 651  | ACT | 25034 | A_95_P265536 | EB444722     |
| 25728 | 303 | 58 | 555  | TTG | 25054 | A_95_P152497 | EB682827     |
| 25736 | 303 | 66 | 794  | TTG | 25069 | A_95_P216537 | EB450834     |
| 25737 | 303 | 67 | 2271 | GAT | 25071 | A_95_P031011 | TA15408_4097 |
| 25740 | 303 | 70 | 244  | CCT | 25077 | A_95_P105867 | CV017649     |
| 25741 | 303 | 71 | 859  | CA  | 25079 | A_95_P181497 | TA12996_4097 |
| 25743 | 303 | 73 | 2652 | GCT | 25083 | A_95_P103692 | TA12219_4097 |
| 25745 | 303 | 75 | 891  | AA  | 25087 | A_95_P196087 | TA16262_4097 |
| 25746 | 303 | 76 | 635  | TC  | 25089 | A_95_P099558 | FG635845     |
| 25747 | 303 | 77 | 804  | CCG | 25091 | A_95_P213977 | TA20162_4097 |
| 25748 | 303 | 78 | 336  | TTT | 25092 | A_95_P176667 | TA11709_4097 |
| 25752 | 303 | 82 | 758  | GG  | 25100 | A_95_P254569 | EB438616     |
| 25753 | 303 | 83 | 354  | GA  | 25102 | A_95_P210027 | TA19313_4097 |
| 25757 | 304 | 2  | 213  | GGG | 24946 | A_95_P140112 | EB444070     |
| 25760 | 304 | 5  | 371  | GT  | 24951 | A_95_P093938 | BP532490     |
| 25761 | 304 | 6  | 573  | AT  | 24953 | A_95_P160917 | EH619615     |
| 25762 | 304 | 7  | 810  | AG  | 24955 | A_95_P290633 | DW000676     |
| 25764 | 304 | 9  | 475  | CA  | 24959 | A_95_P261301 | BP131514     |
| 25765 | 304 | 10 | 861  | CCC | 24961 | A_95_P254104 | EB451857     |
| 25769 | 304 | 14 | 799  | TCT | 24969 | A_95_P204622 | TA18104_4097 |
| 25772 | 304 | 17 | 582  | GC  | 24975 | A_95_P140647 | EB444524     |
| 25773 | 304 | 18 | 394  | TTG | 24977 | A_95_P072965 | BP526091     |
| 25776 | 304 | 21 | 1027 | CA  | 24983 | A_95_P026316 | TA16490_4097 |
| 25777 | 304 | 22 | 892  | TT  | 24985 | A_95_P273811 | EB439979     |
| 25778 | 304 | 23 | 343  | TG  | 24987 | A_95_P209692 | TA19244_4097 |
| 25782 | 304 | 27 | 802  | CAG | 24995 | A_95_P023996 | EB677551     |
| 25788 | 304 | 33 | 871  | GT  | 25007 | A_95_P008556 | EB425062     |

|       |     |    |      |                                                             |       |                           |
|-------|-----|----|------|-------------------------------------------------------------|-------|---------------------------|
| 25789 | 304 | 34 | 751  | CCTTATAGAGACCAGAGAGGGCGTAAAGGTTGCTTCTTATGTACATATTGAATTA     | 25009 | A_95_P290468 DV999697     |
| 25790 | 304 | 35 | 699  | ATTTTGGTATACTTGTGCGCGGATGCCTTTGTTTTATCAGGCCTCCCAATTACAACGT  | 25011 | A_95_P216772 EB428944     |
| 25794 | 304 | 39 | 407  | TTCATGGATCATCTTCTGCTTTAGAGAAAAGCTTCTTGACGCTTGCATTTTGCCTTTT  | 25019 | A_95_P158872 EH616761     |
| 25795 | 304 | 40 | 558  | TTCTCCAGAAGTTATGAGGCCAGGTACATTATGGTTTTATTACAGATCAATTTTCCTT  | 25021 | A_95_P142402 DV161940     |
| 25796 | 304 | 41 | 792  | TTTGTGCATTTTATCACCTTTGCAGCAGGTTCTGTGCTGGTGTGAGGTCAGGTCAGGTT | 25023 | A_95_P121077 DW001083     |
| 25801 | 304 | 46 | 333  | TCCGAAATAACATTCTTACTTGGCTCTCCTCCTTTCTGTACAATAATTAGTTT       | 25033 | A_95_P085610 BP529328     |
| 25805 | 304 | 50 | 504  | CATTCATGTACGAGCAGATGGAGGGGCCATTGGCAGAGAACTCTTTTATTTGGTCA    | 25040 | A_95_P095653 FG644694     |
| 25810 | 304 | 55 | 771  | CTTCAGCTGGCGCTGAAAGCCTGAAAACATCAAAGAGTTGGGGAGAGTTTGT        | 25050 | A_95_P218802 TA21256_4097 |
| 25811 | 304 | 56 | 450  | CCTATGAGCATATGTATAGACTCACTCCTCTGAAAATTAATCAATTTCCATGGATGA   | 25052 | A_95_P001746 AF213464     |
| 25814 | 304 | 59 | 1172 | CTCACTATTAGTCGGTTGATGTTTTCTTAAAATAAAAGAATCACTGGTTCCAGAATGT  | 25057 | A_95_P178312 AB178953     |
| 25815 | 304 | 60 | 1171 | ATTGCCTACTCCATCATTGTATTACATGGATATGTGCTTAGTGACTTTGTATCAAGTC  | 25059 | A_95_P025066 TA13222_4097 |
| 25816 | 304 | 61 | 417  | AAGTTTTGAGAGAGAGGAAAAGCTAGGTTCTTTCTTTGAGATTCATTTTCGGATTTT   | 25061 | A_95_P076325 BP526956     |
| 25821 | 304 | 66 | 797  | TTCAGTTGAAGGCAACAAGGAGAGGCACCCTACATGTTCAACTTATATCCGTCAGAA   | 25070 | A_95_P292158 EB426685     |
| 25826 | 304 | 71 | 509  | GAAGCCCTCTCCTCCGGTCTTAAATATATTTTGAATAGCTATTTCTATTTTAGCAA    | 25080 | A_95_P144117 EB447270     |
| 25829 | 304 | 74 | 703  | TCCTGAATCTTGTTCTAAATGCATGTGATTTATTTTCTTAAATTACATTTGCTGCTGC  | 25086 | A_95_P182382 TA13201_4097 |
| 25835 | 304 | 80 | 193  | CGAGTCAAATAAATCATATGAAACGGAGGGGGTATTTGTTTTTTGGCTCTTATTTCC   | 25097 | A_95_P147807 EB643460     |
| 25837 | 304 | 82 | 868  | TGGTTTCAATTTGAACTCTGAAGGGGGTGTCTAAAGGTGAGCCCTGATGGTCTTCT    | 25101 | A_95_P009981 TA16594_4097 |
| 25842 | 305 | 2  | 542  | AGACTTTGTAATGTGATATGAATTTTGTGTTTGTCTTGTACTGCCTTCTTATGGCACG  | 25110 | A_95_P122042 FG638726     |
| 25843 | 305 | 3  | 812  | ATCAGTTCAAAAATTGATTACTGGGCTTCCAGAATGAGCATTGCTTACGTTTCAGTA   | 25112 | A_95_P242877 DV999293     |
| 25845 | 305 | 5  | 286  | GAAGTGGTGTTCACCTTTTTCATTCTTGCCGGTCAGATGATCATAAAATTAGTGCTT   | 25116 | A_95_P093508 BP532292     |
| 25848 | 305 | 8  | 705  | AAAGGAAATACTCCCTTAGTTCTTTCAATCTGCTGGGACATACTGCACCAGTTCAGGC  | 25122 | A_95_P135412 EB438829     |
| 25853 | 305 | 13 | 493  | CCTGGGACATGATGTATGTTTTCTCTCTCTTGGGAATTGGTTCTCTAAAGAAGCGTCT  | 25131 | A_95_P200667 EH619757     |
| 25856 | 305 | 16 | 331  | CTGGAAAAGTTTAAGCTGGAATGTTGATCAGTCTGATGGAACTTTCTTGATGATG     | 25137 | A_95_P103177 EB442583     |
| 25859 | 305 | 19 | 909  | CAGTAGAGGAACTTTCTTGTAGTTTAGTAGCACTTATGTTGAATGAATGTAAAGGG    | 25143 | A_95_P203697 EB424837     |
| 25864 | 305 | 24 | 546  | TAGGGAGAAAATGGATGTCATTGATCTGGAAGATGATACTATTGACGCTGAGATATI   | 25153 | A_95_P101754 CN824837     |
| 25867 | 305 | 27 | 512  | AATGCATTTAGCGGCTTTGGATAATCTATAAGGTCATTTCGAGGAAGGTTTTTGATAC  | 25159 | A_95_P209207 TA19139_4097 |
| 25868 | 305 | 28 | 532  | ATGAAGATGGTGTGATGGCGCGATGGTGTATATAACTGGAGCTAGTCGCTTGTCTTGT  | 25161 | A_95_P161897 EH620471     |
| 25870 | 305 | 30 | 627  | TTACCTGGTGTCTGTGTTGACTATGCATGAAAAAATTGGATCTGTGAAGAGCTTAA    | 25164 | A_95_P227084 FG635938     |
| 25871 | 305 | 31 | 870  | TTGTTGCTTTGTTATCTCCTTACTCTGGTCAGTTGAAGTGCAGTGGACAAGGAAAGAC  | 25166 | A_95_P249862 EB679189     |
| 25872 | 305 | 32 | 1969 | GGTGTGAAAGCTCCATTTTGCATGAAAGTTCGTCACGGTGGTGTCTTGATTATAGTCT  | 25168 | A_95_P147982 TA17155_4097 |
| 25875 | 305 | 35 | 348  | GCTCTCCCGTGAATCGAATGACAGAATCAAAGAAGACAAACGATGAGAAGAAGGC     | 25173 | A_95_P109162 CV019173     |
| 25879 | 305 | 39 | 725  | ACCATATGAAATCAGTTATTCTTCGAGAAAGCAGCTGGAGAGAAGCCACATTTCAAG   | 25181 | A_95_P243057 EB445482     |
| 25881 | 305 | 41 | 856  | AGAATTCTTACAAGCGCTGCGAACTTCTGTGATAGTGTGGTTTCGCTTCTTGTCTTT   | 25185 | A_95_P196847 TA16432_4097 |
| 25884 | 305 | 44 | 825  | TTTACCTGTGTATGAAGAGACTTACAAGAGTTTGAGATCCAGAGGGGTACGTTTTCC   | 25190 | A_95_P004101 DV159600     |

|       |     |    |      |                                                              |       |                           |
|-------|-----|----|------|--------------------------------------------------------------|-------|---------------------------|
| 25890 | 305 | 50 | 657  | GTCTATGCTGTTAGAAAAGATTATTGCTGATGAAAATAAACCTAGCTGCATGGTGGCA'  | 25201 | A_95_P286483 FG638231     |
| 25893 | 305 | 53 | 574  | AAAGTTTAAAATACAGCTTAAGGATGCTTTCCACACAATTGAAGTGCAAGGACTGCT'   | 25207 | A_95_P141052 EH617724     |
| 25902 | 305 | 62 | 504  | AGAGAGCAAGATGTGCTCTTGAAGATAGTCTAAAGCGTGTTGAAGATATAGTACCA/    | 25225 | A_95_P083905 BP528884     |
| 25904 | 305 | 64 | 781  | GGAGACACTTCAATGTAATTTTACTTTGTTTGCCAGTTTACCTAAGCCTTTCTCTAGTT' | 25229 | A_95_P178692 TA12316_4097 |
| 25909 | 305 | 69 | 510  | GGGGGTCTGCTCTTCTTTATTTTCTTCAAATAATGAGTAGCCTGACTAAGGTTTTAC    | 25239 | A_95_P220547 TA21630_4097 |
| 25913 | 305 | 73 | 544  | TCAACGAGTCAATAGACTAATAGCCTGTTTGGCCAAGCTTCTAAAATCAGTTATTTTT/  | 25247 | A_95_P069765 BP137478     |
| 25915 | 305 | 75 | 851  | ATCTAACTACGTTTCATGTCACTACTTGCCACCAAGCTGATAGAGCACTATCAGCATG   | 25251 | A_95_P243902 FG164291     |
| 25918 | 305 | 78 | 463  | GTCCTGCTACTGTCACTGCTTTGAATCTCCTTAAATCAAGAGGATGATATCCCATAT/   | 25257 | A_95_P102797 CV016202     |
| 25920 | 305 | 80 | 274  | CTGATGATAAAAATGTTTCAAGATTTGTTTACTTCTCCAGCACACTATGCCACATCCGTA | 25261 | A_95_P097475 BP534063     |
| 25924 | 305 | 84 | 910  | GGCGCGACCTAACAAAATTTGGATATCTTTCTTTGGTTACGTTTGATGTTAAACATT/   | 25269 | A_95_P177177 EB447510     |
| 25926 | 306 | 1  | 617  | GCATAAAAGTGGGTGGATTTTCAATACCCCTGTAGATGCTAAAGCCATGGGTCTTCA'   | 25109 | A_95_P031636 AJ504731     |
| 25927 | 306 | 2  | 857  | TAAATTGCCAGGCAATGCAAAGTACTCTGCTAATTCTGGAGTCCAGCCTTCTCCTATT/  | 25111 | A_95_P150542 EB680640     |
| 25931 | 306 | 6  | 421  | AGTTGCTCTTGTTAAATGACCTGACTCTCGCTGAGCTGAAAGCTTTCATTCCAGAGCT   | 25119 | A_95_P087603 BP529834     |
| 25932 | 306 | 7  | 2052 | TTAGCTCATTTCAAAAACGTCTAAAGGAGCACAAATGTTCTTGTATCTTCTGGCCACT/  | 25121 | A_95_P238524 AB003038     |
| 25933 | 306 | 8  | 182  | GTCTAAGAATTCATTCTTAAAGGCACACCCGTTAACAAAATCTACTAACTCTATTC     | 25123 | A_95_P142112 EB445677     |
| 25934 | 306 | 9  | 597  | TATCATGGGATTCTTTTTGCATCAGTATGCTAGTTTTGTCCTGCAGTACTTTAAGATG   | 25124 | A_95_P148247 TA12311_4097 |
| 25946 | 306 | 21 | 891  | TACCTTCTAAAACGTTTTCCAGTTCCTTATGCTGCGTACTTCGTTGCCGTGGCAACTGT  | 25148 | A_95_P289433 DV159365     |
| 25949 | 306 | 24 | 1518 | GCAGAATTTTACTGCTTGACAATTGCAAGTGTGCTTACATGTTATTCGCAATTTGTTA(  | 25154 | A_95_P001731 TA11808_4097 |
| 25950 | 306 | 25 | 259  | CTGCTACCTTCGATTTAGTTTTGAGAGTTTTGCCTTATAAGGTGAATTTCAACCCATGC  | 25156 | A_95_P161652 EH620329     |
| 25954 | 306 | 29 | 268  | TTAGGACAATTCGATCCTCAATTTACGGCATGTTTTAGTTGACAATATGATTCTTGTA(  | 25163 | A_95_P002126 TA15252_4097 |
| 25959 | 306 | 34 | 901  | TCTCTTGTGTATATCAGTAAATGATGATGCTTTTTGTGATATGAACTGGGTAAGGTC    | 25172 | A_95_P195707 TA16175_4097 |
| 25960 | 306 | 35 | 594  | TTGTCCCTCTCCACAACAATATGGCTTCAGTCATCGGATCATAACCCTTTGGCTTTGT   | 25174 | A_95_P287713 FG202802     |
| 25961 | 306 | 36 | 740  | CATTAGTGTAAGAAGCTTCTGAAAGGCCAATTTTCGTCATCAACATCAGTTTATTTG/   | 25176 | A_95_P222782 TA22108_4097 |
| 25963 | 306 | 38 | 960  | CCTTTTTCAGGCTTGATAGATTACTGTCTTGATTTCATATAAGAGAAGAGCTTGTCAAA  | 25180 | A_95_P223807 L29271       |
| 25964 | 306 | 39 | 809  | GTAGGCCTTGCCCCATGTAGTCTTTTTAAGGTTTTTCATTATATGCTAAAGCTTTCTAT  | 25182 | A_95_P198652 TA16825_4097 |
| 25968 | 306 | 43 | 818  | TCATCTTCTATGATTTCTTTCAGTAATGAAATGCTTTGGCAGGTGAAATGCTTTAGCAT( | 25189 | A_95_P012631 EB438528     |
| 25974 | 306 | 49 | 411  | TGCATTTTTAGCAGTAGTAGTGCTCCCAAATCTAAACTTTGGCTTCTTCTGCGGGC/    | 25200 | A_95_P052821 BP133022     |
| 25975 | 306 | 50 | 460  | TGTGTTTAGTTTCATTAGGTGTTGCTACCACATTTTTACTACCCTAGACTATAGTATCT/ | 25202 | A_95_P261826 FG634286     |
| 25987 | 306 | 62 | 798  | ACATCTTGATGTGGTATAGAGTTTCTCATTCTTGGAGGACTTGGCTGCTGCAGTGAG/   | 25226 | A_95_P261951 FG141797     |
| 25990 | 306 | 65 | 423  | TGCTGGAGCAATGCTTAATTATTCAACTGAATGTATGGGCATTACAGACTACATCAA/   | 25232 | A_95_P192417 TA15447_4097 |
| 25991 | 306 | 66 | 850  | ACTAATAGCAGCAATCCAAATAGGTTTTCGGACATTATGTTTGGTGGCGCTGAAATGT/  | 25234 | A_95_P025291 DV157679     |
| 25994 | 306 | 69 | 844  | TTTATGCATGATCTGCGACTGATTCACACTGATCTGAGCAGAAATATTCTTGTTCG/    | 25240 | A_95_P306503 FG155320     |
| 25997 | 306 | 72 | 838  | AACTGCTAAAAGCTTATATCTTCCCACTTGTGGGAATAAACTGGGTATGTTGTTTAT    | 25246 | A_95_P011936 TA12054_4097 |
| 25998 | 306 | 73 | 356  | TCCTACGAAGCAGAAACAGATACTTGGAGAGCACCTTTATCCTCTAGTTAGTCAACAC   | 25248 | A_95_P072690 BP526027     |

|       |     |    |      |                                                              |       |                           |
|-------|-----|----|------|--------------------------------------------------------------|-------|---------------------------|
| 26000 | 306 | 75 | 487  | TTGTTTGGGTTGGTGGTATGAAAATAAAGTGGTTTCAAACAGTTGAGGTTGCATCCC    | 25252 | A_95_P288443 FS396507     |
| 26007 | 306 | 82 | 491  | TCAGATCTTCTCCAGTCCCTTTGTTTTGCAATATGAATCTATGATGATGTGCACTTCTCA | 25266 | A_95_P026051 TA14595_4097 |
| 26010 | 306 | 85 | 1561 | GTTCTCATTAAATTGACGTCCGTAATTTCTGCTGAATCATATATTAATGGGGGTTTCAG  | 25272 | A_95_P015246 AF026389     |
| 26011 | 307 | 1  | 795  | TTATTTGGTGGTAAAGTCATTGTCAAGGCAAACCACCACCAGCCACCACCCTAA       | 25273 | A_95_P233174 FG158371     |
| 26013 | 307 | 3  | 159  | GTGCTGGTGGATATCTGGAATTAGAGTTTTCGAACATTTTCATCTTCCCTTGCACGG    | 25277 | A_95_P050861 BP132500     |
| 26015 | 307 | 5  | 1464 | GAAGTGATGTCTGTTGGTATATTTCTTCTACATCACCTGTACATGTGCAATTATTTTGC  | 25281 | A_95_P198037 TA16693_4097 |
| 26019 | 307 | 9  | 156  | TTTTCCGCGTGCTTTATTACGTTAAATAAATAAACAAGTTGGTGAAGCTTTCATCCCC   | 25289 | A_95_P131182 EB431311     |
| 26031 | 307 | 21 | 750  | CCCTGCTGTATAACTCTATATTGTGTCCTTTATGTATCAGTGAGAACTATCAATAGTT   | 25312 | A_95_P279548 FG638649     |
| 26035 | 307 | 25 | 778  | TAGAAGATAGTGGCATAGGTCTTGCACTGCTAAAGCAGCTGGAATGAAGTGCATT      | 25320 | A_95_P188072 DV999306     |
| 26036 | 307 | 26 | 919  | CAGTGTGTTTTGGAGATGTCTGTAATAATTTTGTGTTGTTGTTGTTGTTGTTGTTGTTG  | 25322 | A_95_P192132 TA15387_4097 |
| 26039 | 307 | 29 | 764  | AGACACCAAACATGAGTGAGATACGTTGGGCCCTGATCCCAGCAATTCTAAGATAT     | 25328 | A_95_P285603 EB429718     |
| 26041 | 307 | 31 | 385  | CCGAAAACCGTTGATTGTGTTTTCATAGGATATGCGACAAATAGTAAAGCATATCGA    | 25331 | A_95_P085135 BP529204     |
| 26045 | 307 | 35 | 897  | CAAATAAAATGCAGTTATTAGCTATCTAAGGACTGTAACCTCCTTCTCTTACTTTCT    | 25339 | A_95_P269641 EB426179     |
| 26055 | 307 | 45 | 1075 | GAGGAACAAAAGAGAACGTTGTTTCTTGATTATTTGTTCTTCAAACCTGTGATATGC    | 25358 | A_95_P011476 TA13481_4097 |
| 26056 | 307 | 46 | 375  | GAAAAGCAGTCACCATCCCCGCCAGCTGTTAAGAAGAAATCTGGAGTAATTGAGAA     | 25360 | A_95_P065670 BP136395     |
| 26057 | 307 | 47 | 407  | GATGAAGATAGAGAATGCAACTCTAAAAGAGAGCTTAGAAAGTATGGATCATCTAA     | 25362 | A_95_P085055 BP529182     |
| 26059 | 307 | 49 | 884  | ATGCATTGCTGGAGAATGCTACTAGTGAGCAAGGAGCAAGAATGTCTGCCATGGAT     | 25366 | A_95_P230659 EB450571     |
| 26066 | 307 | 56 | 810  | GTTCAGGCTGTAATTTGCTAGTTTTGCGTTCTGATACTTTATATTTGTCCTTCTAG     | 25380 | A_95_P145742 EB677695     |
| 26069 | 307 | 59 | 501  | AGTTTTGTGCAATTTAGTCAAGTAAACGGTGGCTGATTTCCCGTAGAGGTCC         | 25385 | A_95_P102677 CV016136     |
| 26073 | 307 | 63 | 247  | GTAACCTAGTCATGCAAAGTCATGAACAAGTAGTGCCTTTGGTCTATTATTTGTATA    | 25393 | A_95_P164067 EH623194     |
| 26074 | 307 | 64 | 332  | ATGGAGTTGAGGTTGTTGTACAGTGAACAATGAACTGAAAATATTGCAGATACTGT     | 25395 | A_95_P154462 EG649597     |
| 26077 | 307 | 67 | 642  | TCCTTTACTGTGTAATTCATATTGTGTAGTGAGGGATGATTGAAATGCGATCTCTTA    | 25400 | A_95_P218647 TA21222_4097 |
| 26085 | 307 | 75 | 885  | CACCCCCACTTTGTTAATCCGAGAAGCAGATACAAACATAACTCAGTTAGGCATTGC    | 25416 | A_95_P246097 EB680029     |
| 26088 | 307 | 78 | 331  | CTACTGTAGTGATCCAGCCATCAACTATTGTAATTTCCCAAGCTTTATAGCATCTTAA   | 25422 | A_95_P142837 EB446239     |
| 26090 | 307 | 80 | 1335 | GATCTGCTTTTCTGTGGCTGAGTGTGAATGCCACACATCATTCTGTGATTTCTCAT     | 25426 | A_95_P009901 TC59718      |
| 26096 | 308 | 1  | 362  | GGCTATTGAGTACACATACAAATACAATGATACAAATACTCTTCTTTGCTATTGAGTC   | 25274 | A_95_P095368 BP533159     |
| 26104 | 308 | 9  | 673  | GATGTTTCTCTTTTAAACTTGTCTTCTGCTTCGATCTGTTTTAGAACCTCTGAGATTAC  | 25290 | A_95_P232874 TA19868_4097 |
| 26105 | 308 | 10 | 437  | AGTTTACATTTCCGGAAGCAGTGAATTTATTAAGGGGAGAAGGGATTTTTTGTGTCA    | 25291 | A_95_P154782 FG635590     |
| 26107 | 308 | 12 | 807  | CAGTTATTAGGCACTGCATACCCTATTATTTTGTACCTTCATTCTATTGTTACAGTT    | 25295 | A_95_P232159 DV159817     |
| 26114 | 308 | 19 | 803  | GCTTATGTTATTGCCATGGTTGTAATGGGAAATTTTGTGATGTAATCAGTATTCCCAA   | 25309 | A_95_P198697 TA16834_4097 |
| 26118 | 308 | 23 | 727  | TCTCCTTGATAAATAAAACCGATTTGGCAGCAGCTGTGGGAGCAGATCTGTCTGT      | 25317 | A_95_P226679 EB425900     |
| 26119 | 308 | 24 | 655  | TGTATACGTCTTTTACTCTTTCTTGATGCATATCGCGGACGGCAGATACAGAAGGGTT   | 25319 | A_95_P163642 EH622724     |
| 26120 | 308 | 25 | 683  | CTAAACACTTGTAGGTGCTATACTTGTCAACATTGCACTCACTGGGAGGACATTTCA    | 25321 | A_95_P261381 FG640951     |
| 26128 | 308 | 33 | 872  | CGCAATGAAAGAACTAGATGCATCTTCTGAAAGTAATGGATTTCTAGCTACTCGTCTC   | 25336 | A_95_P254274 EB428671     |



|       |     |    |      |                                                              |       |                           |
|-------|-----|----|------|--------------------------------------------------------------|-------|---------------------------|
| 26138 | 308 | 43 | 477  | TGCGCGCAAAATGTGGTTCATTTAGAATGATGAAAATAAAATTTGTGGTACTGCAAG    | 25355 | A_95_P142002 TA13269_4097 |
| 26140 | 308 | 45 | 53   | CGCAAATAGTGGCATAACGCAATTTTTGGAGGGTTACAATGCAAGTTATAATTTTCTT   | 25359 | A_95_P006611 CV021053     |
| 26141 | 308 | 46 | 386  | GCATGTAAATAACACTTTTGGTTTATGACATTTCTGTGGGTCATTAAGCTACGCTAG    | 25361 | A_95_P049556 BP132193     |
| 26144 | 308 | 49 | 861  | TGAGAATGAGCCCTTGAGAGATGAGAGACTATGTGTATGATACGTCTCCCTCGATCA    | 25367 | A_95_P293278 FG167224     |
| 26145 | 308 | 50 | 410  | GTAGCACGTAACCTGCCTTATCTTCCTTATTATTAATCTCACTTAACGGGCGATTATTT  | 25369 | A_95_P238604 AB035705     |
| 26149 | 308 | 54 | 748  | AATCTTCGTCAAACCTAACCAGGAAACATCACCTGAGTGAAGCTCTGACCTATTGAC    | 25377 | A_95_P164112 EH623254     |
| 26153 | 308 | 58 | 488  | TATCTGTTGGTCACTGGATGTATTCTGTATCTCATGTATTTATGGTTATCAGACGAGT   | 25384 | A_95_P113012 CV020964     |
| 26154 | 308 | 59 | 754  | TAGGAAGAATATACCTGGGAATGCACAGCTTGATTGACATCATTGGGGTCTAGCTT     | 25386 | A_95_P137232 EB440958     |
| 26157 | 308 | 62 | 525  | GCAGAGATGAGTTGCTTGAAAAATTTGGGTTAATAGTTATGCACTAATCAGCGT       | 25392 | A_95_P269036 AM787843     |
| 26162 | 308 | 67 | 498  | GGTTTGTAACATGAGCATCTCTGCTTCTGGTGTTTAACCTATGTTATTTCTTTTTCC    | 25401 | A_95_P112147 EH620447     |
| 26164 | 308 | 69 | 1322 | AAGTTTGCCACTTTGTAATTCTACTGAGGTCCTTAAAAGCAATAAACTCCTGTTGTCT   | 25405 | A_95_P180752 TA12819_4097 |
| 26172 | 308 | 77 | 456  | GAAGCTCTAATGCACGCTCGCACCATGGGTTACAAAGTTGTATTTACTGATCATTCTC   | 25421 | A_95_P074085 BP526381     |
| 26173 | 308 | 78 | 475  | AAGCAAACCTGGGTCCTTTGGTGAAGCTTTGGCTAAACACAAGGAACAATCATTTGGG   | 25423 | A_95_P054241 BP133384     |
| 26175 | 308 | 80 | 1491 | GGTTACAGGTTCTCAATGGGATCATTTGATAAAAAATCAAAATGTGGATCAGTTTGAG   | 25427 | A_95_P012211 TA13070_4097 |
| 26183 | 309 | 3  | 825  | GTTCAAGGATCAACAGGTACTACTATCTCCAATTGCCACTTTACTGACCACGATAAAG   | 25442 | A_95_P009321 EB427133     |
| 26189 | 309 | 9  | 703  | AGTTCAGTTCAGCGTCACAAACTTTTTGTTTTCATGCCGGAGAGTTCTTAACAATAT    | 25453 | A_95_P088403 EB435217     |
| 26194 | 309 | 14 | 387  | TCTGTCTGCCCTAGGACCACGCATTCCCTTTGTCCATTGTCGAATCTTTATGTATCT    | 25463 | A_95_P162172 EH621028     |
| 26198 | 309 | 18 | 427  | TATCATTGCCTCTCATTGTTGATGTATCCCTATTTTGTGGGATGTGGACTATTACTATT  | 25471 | A_95_P156987 FG639155     |
| 26199 | 309 | 19 | 282  | CCATTCTGTGTATACGTAGAGTGGACCAACTGACTCTTTTTGTTGTCTGTATGTAAG    | 25473 | A_95_P095268 BP533104     |
| 26201 | 309 | 21 | 1747 | TTACTTGTCTTGTACAGAGGATTTGCTTGTTCGATTATAAAAGTTATTAAGTTTTGCAC  | 25477 | A_95_P185447 AY619948     |
| 26203 | 309 | 23 | 782  | ATTACATAGCAGCTCTTGAGATGCAAGTTCGAGCCATGAGTGTCTAGCTAACCTCCT    | 25481 | A_95_P153262 EB683540     |
| 26206 | 309 | 26 | 716  | CTGGAACCTGTATAATTACCCCGTTTTTCATAATTCAGGAGTTATGTTCTTTACCCTCT  | 25487 | A_95_P013516 TA17108_4097 |
| 26212 | 309 | 32 | 833  | TATTGGCTTTTGGATCAGTTTGGGACAGAACTCTGTGATCAGATGCCGCTGGAAAA     | 25499 | A_95_P310213 FG153523     |
| 26217 | 309 | 37 | 739  | GCAAAGTCATGTGGATGGATGCTTTGACTTTGTAATATTAACCTGAAACTTGTCC      | 25508 | A_95_P216807 EB435414     |
| 26220 | 309 | 40 | 535  | GGTCCTTAACTGTTTGTATCTGATTTGCAATGAAATTCCTATTGTGATTAACCTACGC   | 25514 | A_95_P222717 TA22094_4097 |
| 26222 | 309 | 42 | 891  | CCAGGAGCAAAACAACAATGATTCGCCAAAAGTTAGCTTCTTTTTCATTTGTTGAAT    | 25518 | A_95_P244917 EB680018     |
| 26226 | 309 | 46 | 959  | TATTTGTGACAAGTACTATGCTATCCTATGTGTCAATTTGGATTTGCGCTTTGTCTTTAT | 25526 | A_95_P021661 TA22220_4097 |
| 26231 | 309 | 51 | 853  | CAGCATGTCACAGTCTGTATGTATATGCTTTGCAAGTGAATTATCAAATTTGCTATC    | 25536 | A_95_P272881 FG164564     |
| 26232 | 309 | 52 | 765  | GCTTCAAAGAGCTGAATCAATGTCGTCCAATTAATAGCAAAGTTTCTCAGGAAATGT    | 25538 | A_95_P118263 DV161263     |
| 26233 | 309 | 53 | 828  | GTTCAGACAACACTGTATGCTGTTGATTAATTGGTTAAAGACCATCTCGTTTTATACA   | 25540 | A_95_P182527 TA13237_4097 |
| 26234 | 309 | 54 | 863  | ATTCAAAGATCTCCCTTCTTTGAGACTTCGTCGAAGCTATTTGCGCCATGGGCATG     | 25542 | A_95_P228594 DW000726     |
| 26236 | 309 | 56 | 1117 | GGAGGATTGTATCTTGGTAGAGATTCATGTCTAGTTTTTAGGGCACATTTTTAATTT    | 25546 | A_95_P018811 TA15665_4097 |
| 26238 | 309 | 58 | 492  | TTTACTGTACGAACCTAATTTACTCTGCCGCTTGTGTCAAAGCAGGTAAGTCTCG      | 25550 | A_95_P074870 BP526582     |
| 26241 | 309 | 61 | 750  | ATCCATTTGTGACCAACCAGAAGATTGCCGAGTTCCTCTTTGCAGGCAATTCAAAGCC   | 25556 | A_95_P223057 TA22166_4097 |

|       |     |    |      |                                                              |       |                           |
|-------|-----|----|------|--------------------------------------------------------------|-------|---------------------------|
| 26244 | 309 | 64 | 735  | TTTGATGAATCCTCTCAGTACTTGAACCTGAATTTCCCTCCAGCCAGCAGTGGCGTAG   | 25562 | A_95_P223172 TA22193_4097 |
| 26248 | 309 | 68 | 815  | CGTGCTCTGCAAATCCTACCATGGAAATAGAAGAAACATTTCTGTTAATTTTTCTTCTT  | 25570 | A_95_P243652 EB425489     |
| 26252 | 309 | 72 | 1727 | GCATCTGAGGGGAGGGATTTTACACATATTTATGTATGACAAGAGCTTGATTTGTTA/   | 25578 | A_95_P007406 AY366400     |
| 26255 | 309 | 75 | 404  | GAGAATGAAGGTTATGAGGTCATTGTAATTGGGTTCTTTGAATTAACGAAATGGATC    | 25584 | A_95_P207047 FG623545     |
| 26261 | 309 | 81 | 950  | TAAGACTGATCTTGTAGTCGGGCAAGACATTTGTTAATATTGTTAATGGGGCAAAA/    | 25596 | A_95_P197077 TA16483_4097 |
| 26265 | 309 | 85 | 911  | AAGTATTTTGATATCCGAGGGATTCCAAGCCTAGTGGTTTTGGGCCCTGACGAAAA     | 25603 | A_95_P118737 DV161797     |
| 26267 | 310 | 2  | 1105 | GTCATGTAACCTCGTTATATGGTGTGATCTGTCACATGCTACACTTTCTGCAATGAATG/ | 25441 | A_95_P186727 TA14188_4097 |
| 26268 | 310 | 3  | 391  | GAAAGAGAACTTCTTGAGCTACAGTATGTACAAAAATAAGACATGTCAAAACCATGT    | 25443 | A_95_P150102 EB680162     |
| 26270 | 310 | 5  | 658  | ATTGCTCCCTTTGTATGAGAATCAGTTAGCAGAATGTCCAAATAAAATATGAGGCTTC   | 25446 | A_95_P153712 EB683919     |
| 26272 | 310 | 7  | 787  | TACGTATACGCTACCCTTCTAGACCCCACTTATGTTAATGTTGTTGGTCAATTTACT    | 25450 | A_95_P150977 EB681159     |
| 26273 | 310 | 8  | 532  | GTCCGCAAGACTGTTGTTTTCTGGTTGGTTGACATATACATCATGCTGGGCAAGCA/    | 25452 | A_95_P033759 AJ632963     |
| 26274 | 310 | 9  | 253  | ACAACCTGTGATTCTGTTTGAGCATGTTTTGCTCTACAACCTCAAGGAGAGAATTC     | 25454 | A_95_P066465 BP136610     |
| 26276 | 310 | 11 | 285  | GAGGAGCAATATGCTCACAACCTCCTAATTCCTTACATTTTCTTGAGTCTCCCTTCGT   | 25458 | A_95_P105032 EB428527     |
| 26277 | 310 | 12 | 475  | TTCCGGTCCGATGCTGTTGTTCCGTTTTCTGTTTTCTTAGCTCAATGTTATTTCTATTC  | 25460 | A_95_P203482 TA17862_4097 |
| 26279 | 310 | 14 | 645  | CCGGATGCAATTTTTCTCAAAGTAAACTATGAAGAAGCTCAAAGCCATGTGTCATGCTC  | 25464 | A_95_P265346 FG640689     |
| 26281 | 310 | 16 | 630  | TTTGGCGCTGTAGCTTAGTTTTAGTTCAGTTGATAAAATGTCAGTGTCTTCATACAT    | 25468 | A_95_P049171 DW000180     |
| 26284 | 310 | 19 | 363  | TGATGATGTTCTTGCTGTTTTGTTGATCTGCTGTTGGGGAAGACCTTGTCTTATGTTI   | 25474 | A_95_P094493 BP532739     |
| 26289 | 310 | 24 | 769  | GTCTTAGTGATTGGTGTATGGGCGTGGCTGCAAATATTCCTTTAGGCATATGGAGA/    | 25484 | A_95_P194677 EB425191     |
| 26292 | 310 | 27 | 931  | CATTGGTTGTTGTAGGTGTTTTAGATTGTGAATGAATGAAGTCTCATTGTTTTCTG     | 25490 | A_95_P198317 TA16752_4097 |
| 26294 | 310 | 29 | 783  | CTATCCGGACATTATTTACTCGTCAAGAACATGCGCTCCATGCATTCTATTCTTCGAT   | 25494 | A_95_P151832 EB682078     |
| 26297 | 310 | 32 | 966  | GCAAATAAAAGCGTACTTATACACTTGAATCTTCAAAGGAAATCCTTGTGAGGATC     | 25500 | A_95_P009611 TA12795_4097 |
| 26300 | 310 | 35 | 876  | CCGGGAGCAAACCATTCTGTTTTACCTTTCCCTATTCTGATATGTAACATTATGTGCAC  | 25505 | A_95_P130602 TA12081_4097 |
| 26302 | 310 | 37 | 687  | ATTAATGGCAGATTTTGGTGAGAGCGCAATAGGAGAGTGGCGCCTATTGATTCTGG/    | 25509 | A_95_P303278 FG149635     |
| 26304 | 310 | 39 | 1787 | GAGGTGACTGCAGTCTGGATATAACATTATCTCTTTGATCTTAGCTTGAATGTATT     | 25513 | A_95_P007721 L38260       |
| 26305 | 310 | 40 | 758  | TCTTGACTATGAACAAGAACTTGAAACAGCAAAGACCAGCTCATCCGTGGAGAAGAC    | 25515 | A_95_P011676 DW001087     |
| 26307 | 310 | 42 | 737  | AGCTTATGATTGTGCACTTAAACTGATTGAGTGGATGGAAGTACTGATGATGGACTT    | 25519 | A_95_P208322 TA18943_4097 |
| 26310 | 310 | 45 | 795  | CCAGAAGTGATTTGCCTTGTTATTTATGCTGTGTATGCAGAAGAAGGTTATTTGGA     | 25525 | A_95_P011921 DW000377     |
| 26314 | 310 | 49 | 1135 | TGCTCAAGAAACAATCGAAGATATAAATGTGAATTCTGCCCAAACGATTTTACCGTTT   | 25533 | A_95_P025011 TA21394_4097 |
| 26316 | 310 | 51 | 1245 | CTTTTTGTGCCAACTAATATATTGAATGGTTTGGGGTATTTTTGCCTCAAAGTTGCTA/  | 25537 | A_95_P256344 TC43686      |
| 26317 | 310 | 52 | 104  | GGATTATGTTTCGAGATATAACAACATACTACTTGATACTAACGGCGTTTACTGACA    | 25539 | A_95_P112132 CV020533     |
| 26319 | 310 | 54 | 1056 | GTTGCAAGCCATTTAGACCTAAAGTAAATTGGAGTTTATAGTCAGTTAGCTTTAT      | 25543 | A_95_P230559 AF053766     |
| 26320 | 310 | 55 | 394  | TGGCATCATTTTGGGGTACCTGTACGTATAGTCTCTTCTTGCTGGTTAGAATTATCTC   | 25545 | A_95_P076765 BP527078     |
| 26323 | 310 | 58 | 1248 | GGAATCGTAATGTGTACAAGGATGTTGCCTTTCTGTTGTCTATCATGTAATTTTTGC    | 25551 | A_95_P182152 TA13144_4097 |
| 26329 | 310 | 64 | 815  | CATGTTGTTCTGCTTTTAAAATAAACTAGTCTACGCGCACGTTTATTGAGAAATTTCA/  | 25563 | A_95_P243887 EB680330     |

|       |     |    |      |                                                             |       |                           |
|-------|-----|----|------|-------------------------------------------------------------|-------|---------------------------|
| 26330 | 310 | 65 | 277  | CCTTCAACCTAATAACTGATTCTTGGTGTTTGTCCGCAAAAATGCCAAGTGATGCG    | 25565 | A_95_P205252 TA18239_4097 |
| 26331 | 310 | 66 | 714  | AATGGTCATATCTTTAACGTTGGTAATCCGAACAATGAAGTTACAGTCAGGCAGCTG   | 25567 | A_95_P148112 TA17675_4097 |
| 26333 | 310 | 68 | 963  | GAATGCAACTGCGCGGGATTATATTTATATTTTCATGCTGAATTCACGTGCTTCAAAA  | 25571 | A_95_P226684 Y16644       |
| 26334 | 310 | 69 | 1206 | TGGTTGAGAGAAATTGGCAAGGGGGATGAATAAAAGTCTGCAGGATGAATGCTACT    | 25573 | A_95_P111912 AY220080     |
| 26335 | 310 | 70 | 568  | AGTGGTCGTAGTTGGAGATAAATCATCTAATCTGTTGATTTTGTCTCCAAATCCTA/   | 25575 | A_95_P227054 FG640545     |
| 26337 | 310 | 72 | 841  | TGTGTACACATTACCTGCTCTATGTTACTAGTATTCGATTTACGCGCTCAACTGAAAA/ | 25579 | A_95_P271086 TA19840_4097 |
| 26344 | 310 | 79 | 800  | CTGCCTTTATGATGCACTAGTAAGACCTTATATTTCTTGAGATTGTTAAATTCTGCTGT | 25593 | A_95_P002566 TA11864_4097 |
| 26345 | 310 | 80 | 501  | TCGGGGAACCTTGTCTAATTCTATCTACCAAAGCTTAGGCAAATAGAAAGAAATGT(   | 25595 | A_95_P298558 FG636346     |
| 26346 | 310 | 81 | 450  | CAGGTGCTGTTGCATTATAGGTTGGCAAAAGACGAGCTTGTATTATCAAAATTTACC   | 25597 | A_95_P001386 EB447417     |
| 26347 | 310 | 82 | 874  | AGAATTTGAGACCGGAGATACCTCGTTGTTGCCAAGTCTTTGGCAAATGTGATGA,    | 25599 | A_95_P294613 EB441748     |
| 26350 | 310 | 85 | 765  | CATGCCCCAATAGGAATTGTAAGGTAAGGTCTAGCTCAGTATATATTTGCTATTAGAC  | 25604 | A_95_P116517 DV159282     |
| 26353 | 311 | 3  | 754  | TTTAAGGCTTAAGTGTGGAGAAATTTCTACTGCTTCTGATTGGACATGTAAACGGGAG/ | 25609 | A_95_P126327 EB425660     |
| 26356 | 311 | 6  | 753  | ATCAATCCCCTGAACCTCGATCAGAAATCCCCTGTTGTCAGTGGACCTTCTTTTGAAGG | 17966 | A_95_P000116 FG157904     |
| 26358 | 311 | 8  | 127  | CAGAAAAGCAAATAGTAATATATACCTGATGGCATTCTGATGCTGGGGGACACGGAC   | 25618 | A_95_P111047 CV020023     |
| 26360 | 311 | 10 | 515  | CGTCAATCTCTTCTCAATTGTACACTCAAGCAATCATATCTCAAGTATCAATTTTGCG  | 25622 | A_95_P029421 DW003670     |
| 26362 | 311 | 12 | 739  | TGCTGCAGCTTAATGTTTATTCGGATAGGCCTTAGTCTTCTTGGCCAGTATATGGA,   | 25626 | A_95_P248387 EF051129     |
| 26369 | 311 | 19 | 702  | CTGTATACAAATAGTTCAGACTGGCCCTAACATGAAGAATCTTGATAAAGATTTAAC   | 25640 | A_95_P197412 TA16555_4097 |
| 26373 | 311 | 23 | 538  | TGTTTGTGTATATACTCTCCATCTGTGATCTCACTATTTTGACTTCTAAGGTGAAT(   | 25648 | A_95_P299423 FG638572     |
| 26375 | 311 | 25 | 767  | AAGCAGCAACTAAGGTCCATCTCTTATTCTCTTACCTCTTCAATTTGGTGATATAAA   | 25652 | A_95_P197712 TA16623_4097 |
| 26376 | 311 | 26 | 891  | GAGAATCTGTATGTTGTGGATGAGAAAGATACAGCTTTAGATACTGTTATGGAAAAT   | 25654 | A_95_P227614 EB427793     |
| 26377 | 311 | 27 | 427  | GAATCTAGTTTTGGGTGTAATTGGTGTTGCAGCAAATGCAACACTATGAAGGATTTT   | 25656 | A_95_P214227 TA20217_4097 |
| 26379 | 311 | 29 | 283  | TTCTTCAGATGAAGGATCAATCTGTCCGAAAATTGTCATCGTCCCTCCTGATGCTGAG  | 25660 | A_95_P086545 FG640368     |
| 26381 | 311 | 31 | 319  | TGGATTAACCTCTTTAATCATATTACATAGCACGCTGCGCTTGTGTTTGCCAAAAA/   | 25664 | A_95_P033819 AJ633029     |
| 26382 | 311 | 32 | 882  | TGCTCTACTTAATGGTTTGCAGAATTCGCGTGTTTATACTTTAATGTGCATGTTGGTA/ | 25666 | A_95_P185592 TA13948_4097 |
| 26383 | 311 | 33 | 767  | AGAGGAGAGAGGAGAGGGAGAAGGAGAGAGAACAATCCGTAATCAAACCTTTTATT    | 25668 | A_95_P213737 TA20112_4097 |
| 26395 | 311 | 45 | 1339 | GGCTTTGGTTTGATCTTGTAGATATTTTGAGTGCTTTGTATCGGCATTATTCAGAATG/ | 25692 | A_95_P238789 AB022273     |
| 26398 | 311 | 48 | 547  | AACCACTCAACATTATGTGTTTTCTGGCCATAATTTGGAGTTTGATCAATCGCCTTCT  | 25697 | A_95_P183222 FG137478     |
| 26399 | 311 | 49 | 131  | ATGCTGCTTTTGCCTTGGTAAGATATGTCAATTTTCATCAGGAAAGTATCGACTCAGC  | 25699 | A_95_P154847 EG649783     |
| 26410 | 311 | 60 | 255  | CTCCTCCTGAGGAACCATTAAGTATAAGGAAATTGAGGAGCTCATTGCTGAGCTTT    | 25720 | A_95_P078645 FG641707     |
| 26411 | 311 | 61 | 261  | AACGATGTGAAAGTAATCCAGTCTCATCAATGCAAGATGCCTTTGATGGCTTCACGC   | 25722 | A_95_P052466 BP132930     |
| 26413 | 311 | 63 | 330  | GTGATTTGCTGGTGGCCAAGGTGAAGGAGATGATGCAGCAATTGGGAATCAAAAT     | 25726 | A_95_P101988 U74325       |
| 26415 | 311 | 65 | 171  | CCTTTTCTCTTAATTTAAGTCAAATAACAAACCTCTTGAGTGTACTTTGAAGCCGCC   | 25730 | A_95_P159227 EH617185     |
| 26418 | 311 | 68 | 445  | TTTCGTGGTTCTAGCACGGTCGCTCAATTGTCATATTTGGCTATTTATCTGATTTTAA  | 25736 | A_95_P090743 BP531076     |
| 26419 | 311 | 69 | 113  | CGAAGGCGCCTTATGTAATTATATATAGCATAATCCAAAGGCTAACAACAGAAAGAT   | 25738 | A_95_P140577 EB444465     |

|       |     |    |      |                                                             |       |                           |
|-------|-----|----|------|-------------------------------------------------------------|-------|---------------------------|
| 26422 | 311 | 72 | 473  | ATAATGTGGTGTAATGTGCTGCTGCTTTCTTAGCCGAGAGTCTTCGAAAACACCCT    | 25744 | A_95_P072790 BP526052     |
| 26425 | 311 | 75 | 726  | TGTTGCTTTGAATGCGGTGCTCACTTTTGC GACTGCTTCTCCTCTACTCGGAATATG  | 25750 | A_95_P257059 FG636654     |
| 26427 | 311 | 77 | 513  | TTAGGGTTATTGGGTAAGTGGCTTATCTGGGAAATTTGGGAACTAGTTTTCTTCT     | 12052 | A_95_P000101 FG167017     |
| 26431 | 311 | 81 | 125  | TGCTTGTTAGATCTCAATAACCATTGGGCTAGCCCTTTAGTCTCAGCTGCCATTTG    | 25761 | A_95_P114152 CV021471     |
| 26434 | 311 | 84 | 860  | TGTTGTTTGCTTGACAATTTAGCTATTCGTGACTCAGCTAATGCATCATCTTCTGGTC  | 25767 | A_95_P118687 DV161763     |
| 26436 | 312 | 1  | 321  | AGCTTTCAGATTTACAGTCTCTCATGGAGTTTATTTACCGAGGTGTACTTTGGTATAI  | 25606 | A_95_P089538 BP530542     |
| 26439 | 312 | 4  | 766  | GTTGAAACTTATCGACTGGAATGGAGAGCATTACTTCTCACACTTGCAAATCTGTGC   | 25612 | A_95_P283988 DW003539     |
| 26447 | 312 | 12 | 784  | CTTGTCGGAAGACATTGGTTTGTAACCTAAAATGAAAGGAACTGGATTGAGACAATA   | 25627 | A_95_P183497 EB429193     |
| 26455 | 312 | 20 | 819  | TTGGGGAAAGTATGTGGAGAGGCTTCTTAGTAGTGGCTTTGTTAATGCCATCAAATCT  | 25643 | A_95_P117667 EB430351     |
| 26458 | 312 | 23 | 371  | CGTTGTTTCAGTTTGTGTGTACAGGAACCAATAGACGGTCAAATTTAATAGATTI     | 25649 | A_95_P003926 FS413762     |
| 26459 | 312 | 24 | 527  | TGACTCAGTGACACCGGTTTAAAGAGTGTATATATGATTTGTGAATTTCTTCC       | 25651 | A_95_P019176 EB433277     |
| 26461 | 312 | 26 | 651  | TGATTGAGAAACAAAACCGGAGGATTTGTTGCCTGTTGTGGTACCTTTCCGGCTAACAI | 25655 | A_95_P170094 EH664824     |
| 26462 | 312 | 27 | 172  | GGAGAAGAGAAAGTTGGAAACTCATTATTGAGCGCATGCTCATACCTTTAGAAAGTC   | 25657 | A_95_P098023 BP534296     |
| 26464 | 312 | 29 | 847  | AGGGGGGAAGAAGTCAAGTGTGCAATATGGATTGTGGCCTCACATAGTGTCTTTCTG   | 25661 | A_95_P031491 TA16203_4097 |
| 26465 | 312 | 30 | 296  | TTTGTTGCCATCGCAAGTATGTCTCCATAGACATGGCATTGTAATCTTTATTTCC/    | 25663 | A_95_P034883 BJ999149     |
| 26466 | 312 | 31 | 869  | CACTTTGGCTGACATATGCCAGCGACTTTCCTTCAATATTTATTTAATTGACAAA     | 25665 | A_95_P178512 TA12268_4097 |
| 26467 | 312 | 32 | 636  | TGTCGCCTTCACATCTCCCTGATCGAGTTTATGGATTATTTATATAGTTGTGTTTGA   | 25667 | A_95_P233714 FG641857     |
| 26468 | 312 | 33 | 340  | TGATGAGGATTTGTAGCTGTAATTGCCTTATGATTTGATGAGTGGTGAATTTATTCG   | 25669 | A_95_P209067 TA19108_4097 |
| 26470 | 312 | 35 | 633  | GCTTATAGAAGTGGCATTTCACACAAGTAGCTGCAATGTGTACAATTTACACATT,    | 25673 | A_95_P149012 EB678671     |
| 26472 | 312 | 37 | 384  | GGTGAATTCCAAAGGGAAAAGCTGTGATTGAGAATTAAGTGGCCTTCGGAGCGAGA    | 25677 | A_95_P161572 EH620253     |
| 26473 | 312 | 38 | 203  | GAATCCCTACATTGCTCTACTTTGTTTTATTTATTGCAAATGTGCTAGACAAAAGACCT | 25679 | A_95_P031506 BP531462     |
| 26475 | 312 | 40 | 798  | GGAACCTTGAGTTGAGACATTAGAGATTGCTGGTATATATTTTAAAGAGCTTGCTCGTI | 25683 | A_95_P246732 EB643454     |
| 26476 | 312 | 41 | 274  | GGATAAGATGCTAGAGAGACTTAAGAATGCATAGAGTATGTTCCCAATACATTATT    | 25685 | A_95_P101853 CN824887     |
| 26480 | 312 | 45 | 815  | TAATGCTTTTGGCTATCAAAGCCGTTGCAGAAGGAGTCCCTGAGCTAACAAAGGGAAG  | 25693 | A_95_P119162 DV162239     |
| 26481 | 312 | 46 | 814  | CCACAGTAGGCAGATAGATGACTTGATTCACTTTCTACAATAGGCTGATTGATGACT   | 25695 | A_95_P226564 EB450058     |
| 26485 | 312 | 50 | 787  | TGCTTCATCGCCAAATGTTCTTCAATGGCTTGTCCCATGTTGATGTCGTGACCCCTTTT | 25702 | A_95_P207647 EB679774     |
| 26489 | 312 | 54 | 678  | CTTTGGCACAGTAGATCGTTATCCTTGTACTCCTATTTAAGTTGTATTCCAGCTCGCAC | 25709 | A_95_P005386 EB438907     |
| 26493 | 312 | 58 | 1391 | CCTTTTAGGAAGAAATTTGGCAGATGCATTTTTCATGCATTTACATTGCATGATCACAC | 25717 | A_95_P009296 AB066279     |
| 26495 | 312 | 60 | 1363 | CAATCTTGGTGAATCTGTCTCGGTTGAGGATGAAAGTGTGTAATCAACAGCATTG     | 25721 | A_95_P194557 TA15921_4097 |
| 26500 | 312 | 65 | 1189 | AGTCCCTGAGTTGCTGCCAATCAAAGAATCATTGGTCAAATATGATTTGAACCAA     | 25731 | A_95_P012121 TA16920_4097 |
| 26502 | 312 | 67 | 720  | CATTTGATACTCGATCTGAATTCTGGAGCTTTGATGTTAAATTTCTGATATACACCTGA | 25735 | A_95_P022251 TA13250_4097 |
| 26507 | 312 | 72 | 626  | ATGCATGCATGGTTTGTGCTGCTGATACTCGCTATGCAGTGGTTGTTCTATAA       | 25745 | A_95_P019136 TA14564_4097 |
| 26508 | 312 | 73 | 1029 | ACACCACCCAGTATAAGAGAAACATGAGTCAAACCTTAGTGTGTTACTAAGGTTGT    | 25747 | A_95_P193127 TA15604_4097 |
| 26511 | 312 | 76 | 898  | GTTTTATCTGCTACATCTAACTAGGGAAGTACTACGACTACTACTACGTGGTGTCTA   | 25753 | A_95_P225577 EB443157     |

|       |     |    |      |                                                             |       |              |              |
|-------|-----|----|------|-------------------------------------------------------------|-------|--------------|--------------|
| 26513 | 312 | 78 | 543  | ATTTTTGGTGTACTGTGTATCCGAACGTGGATTATGCCTTTCGTAGTCGCTCTCTGGT  | 25756 | A_95_P162522 | EH621474     |
| 26514 | 312 | 79 | 63   | CTGACTTGGATTATTGATAGCTAAGCTTACTTAAGGTCTTCTTGAACTTTTGCTGT    | 25758 | A_95_P145067 | EB448606     |
| 26515 | 312 | 80 | 563  | TTAGTTGCTGAACGTTGTGATCTCTGGCCTCTGCCATATAAAATTTACTATGCAACG   | 25760 | A_95_P189132 | EH622674     |
| 26518 | 312 | 83 | 1010 | TGATTGTGATCTATGGGATCGCGACTATAATCGTTTATAATAAAACAAAGACTTTGTCC | 25766 | A_95_P007676 | M15173       |
| 26520 | 312 | 85 | 782  | GGGAAAATTCTCCCTGGTAATTATTGTAGTAGGTGTTGATTTATCTACTACACATGA   | 25770 | A_95_P015411 | EB450584     |
| 26523 | 313 | 3  | 612  | AGGATCCTCTTCTCAACAGCCAAGGCTCGTTCTCAAATCAAAGTGTGCTGTTCAA     | 25774 | A_95_P131632 | EB679714     |
| 26526 | 313 | 6  | 552  | CACTTTGTAGTTTGTATTGAATGGTTATAAATGAAAAAGGGCTATGACTACCCGCAC   | 25780 | A_95_P021081 | TA18792_4097 |
| 26529 | 313 | 9  | 837  | TCATTACAATTCATTGTGGATGGAGAGTCAGATTATCCCTGATCTTCCATGTGTAGCA  | 25786 | A_95_P285223 | FG142087     |
| 26537 | 313 | 17 | 507  | CATCATCTAGTGTATGAAAATGTAATGAATCTTGTCTTGTGTTGGATTGGAACACAT   | 25802 | A_95_P095488 | FG636446     |
| 26541 | 313 | 21 | 1553 | GGGAATACTGCTAGGGTTTTCTCGGGATGTTTTATCTAGAGTATGAGATTATTTTTGC  | 25810 | A_95_P008431 | AF190657     |
| 26543 | 313 | 23 | 813  | ACTGATGAGTGTGCATGGCCTAACCGCGGAAAATGTTGCTAGTCATTTGCAAAAATA   | 25814 | A_95_P151987 | EB682256     |
| 26544 | 313 | 24 | 654  | GATTGCCGTTATGTGTACTTCACCTGTGTGAGTAATACAGATTGCTCCTGTTCTTCG   | 25816 | A_95_P198968 | TA16892_4097 |
| 26547 | 313 | 27 | 594  | AGTATTGCTGACACTAAATGGGCAGCTTGCTGTTGAAAAGGCCATGCTGCAGATAA    | 25822 | A_95_P032291 | EB449088     |
| 26548 | 313 | 28 | 103  | TCCACAATCAGATGGCTTGTGCTCGATCTCCATCATTGGTTGGGAATGGCATAAATC   | 25824 | A_95_P171676 | EH665193     |
| 26554 | 313 | 34 | 886  | TATTTTCAAGTTGCATGTTGATGGAAGCTGGTGTGTGAGACTTTCTTATGTTTCAA    | 25836 | A_95_P011611 | TA13458_4097 |
| 26556 | 313 | 36 | 561  | GCTATGTTGCAACTTCTAGTCAATGACTTTGATTTGCTTAGTATATCAACTTTCATCTC | 25840 | A_95_P005236 | EB442583     |
| 26559 | 313 | 39 | 182  | GTTGTGTATTAAGAAACACCATTCCATCTCATGCAATTTCTGATATGTTTTGAGGATC  | 25846 | A_95_P099033 | BP534736     |
| 26561 | 313 | 41 | 521  | GTTGAAACGCGAATCATAGTATTCATTCTTATGGGAATGGGAATGAAAACAAGAC     | 25850 | A_95_P270566 | AM798360     |
| 26566 | 313 | 46 | 579  | GAGAACATATACCCAGTTCTTACTGAGTTCAGGAAGAATCAGCAATGAGTTGAGAG    | 25860 | A_95_P284403 | BP131165     |
| 26567 | 313 | 47 | 109  | GTTGCCTTCTGTTGTTGGATGTTGTTGTGTAATTTATGTAACAAGTTGTTGTAGGA    | 25862 | A_95_P092168 | BP531674     |
| 26568 | 313 | 48 | 223  | GTTGCGTCGTGGCCTGTTATTGTTCTACTCTTAGGTATGTACACATCTAGCTGAAAAG  | 25864 | A_95_P095483 | BP533211     |
| 26575 | 313 | 55 | 810  | TTATGAAGGTCATTGAGAGGCCATTGTCAGAAAATGAGCGCTTCATGCTGGCAAAAC   | 25878 | A_95_P261816 | EB448369     |
| 26579 | 313 | 59 | 877  | CATTGTAAATGAGGAGCCTAAATCTCTGTGGTTGAGATAGGTGTTTAGTTTTGTC     | 25886 | A_95_P005081 | TA12257_4097 |
| 26581 | 313 | 61 | 1498 | CTGGATGGCGTTCTTTTTGAACGTTTTAATTTATGTAGCATGATCTGTGTATGACAAT  | 25890 | A_95_P217557 | X83880       |
| 26583 | 313 | 63 | 768  | AGGATGCTAAGCAATCACGATATTTCTTGAAGATGGTCATCCGATAGGATGTGCCAA   | 25894 | A_95_P157537 | EH615587     |
| 26585 | 313 | 65 | 428  | TTCTTGTTGGAGATTGAAGCAAAGACAAAAATGGCTAATGGCGCAGAATGCCTGC     | 25898 | A_95_P005876 | EB678658     |
| 26594 | 313 | 74 | 856  | GGTAAATAGGGTTGACGCAACATTGCCAATATGGAGTTGTTCAATGGTTTTAAGCTT   | 25916 | A_95_P245612 | DW000372     |
| 26596 | 313 | 76 | 199  | GGTGGTTTTGGAAAAGCAATGTACTCTGCTATCGCTCTATTGAATTGAAATAGAAAT   | 25920 | A_95_P091768 | TA16554_4097 |
| 26612 | 314 | 7  | 143  | TCGTATTCTTCGAGATGTAAATTTAAGATTCGGGGAACGGATCCTAGTATGGATATC   | 25783 | A_95_P108222 | CV018725     |
| 26613 | 314 | 8  | 663  | CCATGTCCAAAAGCCTTCCAAATAAAGACCTCCTGATCAACCTTCAAGAATGCCAAG   | 25785 | A_95_P132467 | EB432949     |
| 26622 | 314 | 17 | 155  | TCATCTTTGACGCGTTGTTGTGGAATTATGATGAAGTGTGGACGTGATACATCGTT    | 25803 | A_95_P032196 | BP533238     |
| 26628 | 314 | 23 | 196  | ACTAGTCTTTGATTTTCATTGACCTGCTTTGACAGGCCAGAATAAATTTCTTCATCCA  | 25815 | A_95_P105067 | CV017283     |
| 26631 | 314 | 26 | 449  | TTGGGGTTAGGGTTTCGTTCAATAGTATTAGTCGGTTAATTTTTGTTGGTTGATTTCA  | 25821 | A_95_P208442 | TA18970_4097 |
| 26633 | 314 | 28 | 443  | GTTGAGTAAAAATTTATAGCGCACTCTTGCACATCTTAACTTGGTCCAATAATGT     | 25825 | A_95_P111527 | EH617796     |

|       |     |    |      |                                                              |       |                           |
|-------|-----|----|------|--------------------------------------------------------------|-------|---------------------------|
| 26640 | 314 | 35 | 903  | CAAGATGATCGGCTCTTTCTATGAATCCTCCTTATGTAATGAGATTCTCTCTATAT.    | 25839 | A_95_P007706 TA13105_4097 |
| 26641 | 314 | 36 | 850  | TCTTGTTGCATAAGAATCATATGCTACTGGGGTAACAAAGGCACGCTATTCATTGT     | 25841 | A_95_P018876 DV158102     |
| 26642 | 314 | 37 | 444  | CACATCCATCAATAAAGGTCGGATTTCTCGTATTTATCCCTTTGTTACGAGTTCCTT/   | 25843 | A_95_P093328 FG640666     |
| 26644 | 314 | 39 | 209  | TGCAAATGTGGCATCTAGACTGCAAGTGTCACCCATTGCACTATGTTCTAAGTGAAC/   | 25847 | A_95_P103512 CV016540     |
| 26647 | 314 | 42 | 483  | CTATCATCATCTGGCCTACTATTTCAAGCATCCTCCTATTTGGCAATTTGAGAAAACAT  | 25853 | A_95_P049906 BP132274     |
| 26650 | 314 | 45 | 717  | GCACTCGTAGTTACCCGTA CTGTTTGTTCGTATGCGTTTTGTGACAGAGCAAACACT   | 25859 | A_95_P251467 FG635853     |
| 26653 | 314 | 48 | 570  | GGTCCAGGATTAAGTGGAAATTCACCAAGTTCCTGGTTGAATAAGACGGAAAATAA     | 25865 | A_95_P106233 CV017817     |
| 26656 | 314 | 51 | 766  | AATAGCGTCTAAGAGATGCATATAGCCTGTATTTAAGATCAGCTGCTTGTGTAGCAA    | 25871 | A_95_P194327 EB450105     |
| 26658 | 314 | 53 | 721  | GTACTIONGATTTCTTTCAATTTTGGAGGATGCACCCTTCTCAGAGGGCTTTCACCT    | 25875 | A_95_P136542 EB440321     |
| 26660 | 314 | 55 | 839  | TCTGCAGTAACTTTAGGGTAAATTAATGTAATATTTTGCCTTTGGCTGACATATGCA    | 25879 | A_95_P148442 EB425860     |
| 26664 | 314 | 59 | 855  | TTACAGTTTTGAGTGCACTGGAACGCTCGGTTATGAGGGCTGCTTATAGAGTGCTG     | 25887 | A_95_P245992 EB678659     |
| 26677 | 314 | 72 | 782  | TAAAGAGTCCCTTTCCGAACCAGGAGAACCTCTGTGAAATCAGTTCAAGTAGTTC      | 25913 | A_95_P138407 EB442174     |
| 26678 | 314 | 73 | 434  | CTGTCTTAGCAGCCTTCTGTGTATTGAGATTGATTTAATGTATTACTTGAACAAGTC    | 25915 | A_95_P122302 DW002313     |
| 26680 | 314 | 75 | 764  | GAAGCTCATAGCAGAGGAAGCAAAAGATCACACCACCTGTTAGCATTCTTTGATGC     | 25919 | A_95_P218672 TA21228_4097 |
| 26681 | 314 | 76 | 287  | TGGCACTGTATTTTATGATATTGGGATCTTTATCTTGGTGGTTTTGAAGTTTGGGAGATT | 25921 | A_95_P109217 CV019192     |
| 26683 | 314 | 78 | 828  | AGATGCGTTGGATATCGTAAGGGATCCAGAAGAAAGAGAGTGTTCATTTGTTTAA      | 25925 | A_95_P218107 TA21099_4097 |
| 26686 | 314 | 81 | 718  | ATCAATCTACTTCGCGTACATTTAAACGAACTCTGTGCTGGGAAAAGTTGTTCACAT    | 25931 | A_95_P223072 TA22170_4097 |
| 26690 | 314 | 85 | 161  | ATAATTGATCCACAGAAGGATAAAGAGTTCGAGGGAGTTGTTCCATACGTCAGTTGC    | 25939 | A_95_P040061 BP129722     |
| 26691 | 315 | 1  | 1582 | GTCGAAGAAAATGCAACATATTGCTGTTACAAGAACCACTGAAAAGGGAGTTGATTG/   | 25940 | A_95_P188807 TA14651_4097 |
| 26692 | 315 | 2  | 596  | ACAACTATGTTTACCGTGGTTCTTTGCCGGCACCTGATTTTACCAGAGAAGTATCCTC   | 25942 | A_95_P046581 BP131435     |
| 26695 | 315 | 5  | 1829 | AACTCCGCTGAGACTCTAATAACATAGTGTGTCATTGTGGATATGTTTGTATTACA     | 25947 | A_95_P015846 TA12251_4097 |
| 26696 | 315 | 6  | 788  | TTGCTCACACTTTATCTGGCCATCGTGATGGAGTAATGTCAGTCGAATGGTCTGCTTC   | 25949 | A_95_P310908 FG172547     |
| 26700 | 315 | 10 | 442  | TTCTGGCTTGGTTTGTGTCATCTGTTTTTGGTGGTTTTGGAAAAGCAGTGTGGGGG/    | 25957 | A_95_P101503 CN498848     |
| 26706 | 315 | 16 | 1072 | TCAACATGCTCTCAAATCATCTAAACCGTATGAGACTTATTTTCCCGTCTCAATTC     | 25969 | A_95_P202757 TA17703_4097 |
| 26709 | 315 | 19 | 638  | ATAGGTACCCAAGAGCTAGGTTAAGATGAGTTTTCTTTTACATGTGTTTATGTGGTGA   | 25975 | A_95_P119412 DV162620     |
| 26711 | 315 | 21 | 830  | TCAACATTGCTACTCAGACAGTTGCAGGCTATGTCTTCATGGTTGTTGCTGCTAGCAT   | 25978 | A_95_P146967 EB451156     |
| 26713 | 315 | 23 | 1016 | GTTTCATAGATAGAGGATACACCTACTTTCCATTTTGTCAAGTCGATGTTGAATCAAT   | 25982 | A_95_P029401 TC48071      |
| 26718 | 315 | 28 | 738  | AACTCTGGTATTTGATTTGCTTAGAATGTGGTAGTTGCTTTTCCAACAAAGATGGTTT   | 25992 | A_95_P013971 TA13071_4097 |
| 26719 | 315 | 29 | 421  | ATGAAAATAAGGTGGTTCCAACAGTTGAGATTGCATCTCAACGCCTAGAACTTTGC     | 25994 | A_95_P023661 BP532793     |
| 26721 | 315 | 31 | 812  | CAGAGGTTTCATATATGTCAAAGCAATGGTTAAAGCAGCCTGCATTCATTCAATCTTTT  | 25998 | A_95_P259341 EB682828     |
| 26724 | 315 | 34 | 438  | GCCACTAGAATTAAGCCTTGACTTGGTCTTTTGGATTTAGGTCCAAGGTATGATTTCT.  | 26003 | A_95_P044756 BP130966     |
| 26725 | 315 | 35 | 880  | GGTGATTGATGCAATTAGAGCTGGAAGCTACTGCTAAATATTGTAACATAATGAACAT   | 26004 | A_95_P204897 TA18164_4097 |
| 26727 | 315 | 37 | 333  | ACATAGTAATGTGAAATTGTGAATCAAGAATTCATCTCCAGTAATACTCCTGCTC      | 26008 | A_95_P132857 EB433648     |
| 26728 | 315 | 38 | 740  | AAGAATTATGTCGGATTCTCTGTGTTTTCACTTTTTCATGGCTGTGAGGCCTTTTCTGTT | 26010 | A_95_P184418 TA13692_4097 |

|       |     |    |      |                                                              |       |                           |
|-------|-----|----|------|--------------------------------------------------------------|-------|---------------------------|
| 26729 | 315 | 39 | 701  | AAAGTAATCCCTAATCTAGCAGCCGACTCCTCTCCCATTTGTTGCTGAGAAATCTCG(   | 26012 | A_95_P301948 FG152175     |
| 26732 | 315 | 42 | 901  | ACACTACTATATACGATGGGATAAATATATGCATTGAAGGCGGAAATTGCACTGCAA    | 26018 | A_95_P292643 EB427886     |
| 26735 | 315 | 45 | 373  | CCTATCCAATCATTCTACTATAAGTCCCTTCTTCATAGCTACCCAATATGTAATTTATC  | 26024 | A_95_P142427 EB445890     |
| 26736 | 315 | 46 | 574  | ACATGGTTACTAGCTCCTTGAATTTATGCTATTTAAGTTCTCTTGTACTTTGTGGACTG  | 26026 | A_95_P045731 BP131218     |
| 26739 | 315 | 49 | 778  | GAAATAGAAAGACAGAGGATGAAATGCTTTCCTTAATCAGGTGGAAAATTCGACAG(    | 26032 | A_95_P117597 DV162682     |
| 26743 | 315 | 53 | 642  | AAGAAGCAGTTGGTGCCATTGCTTTTAATCCCAAGAAGGAGGACCTGGACTTTGTT(    | 26040 | A_95_P182072 EB430441     |
| 26744 | 315 | 54 | 479  | ACACATTAGGTTCAACACGATTTCATATGTATAACCGATTCATGAAAATGATATACAGC  | 26042 | A_95_P299483 FG643481     |
| 26746 | 315 | 56 | 849  | TGCCCGCATGTCCAGGCTTCAGTCCCTTCAAATGAGTACTTTTTATGTTCAATTTACTA' | 26046 | A_95_P226689 EB425964     |
| 26748 | 315 | 58 | 822  | GCTGTCGTCTTTGGAAGTTCATTAGATCTAAAAGAGTTTGAAGTTCATTAGATCGTT    | 26050 | A_95_P229019 DV157735     |
| 26749 | 315 | 59 | 228  | CTATTGAAGTTCCTTTCCATCTGCTGTTGATTGTTTGTGTAATGAACCTCTTTTGC(    | 26052 | A_95_P027376 BP531067     |
| 26751 | 315 | 61 | 186  | GGTTGGACATTTTTGGGGTTGAAACTGAAATTCGAAAAAGAACGAAAAGGATTC'      | 26056 | A_95_P096338 BP533583     |
| 26753 | 315 | 63 | 904  | GATGGTAATCAAGATATGATGCAGATTGATGAAATTGATTCTAGAAATGGGGCTTAC    | 26060 | A_95_P198367 EB679747     |
| 26756 | 315 | 66 | 625  | ATTTATTAGATAAAAGGTCGACGCGGGCTCTGCCCGTTGCTGCGATGATTTCATGATA/  | 26066 | A_95_P029466 TA19036_4097 |
| 26758 | 315 | 68 | 725  | TGGGTATGGTGGTGTAGTGATCTCCACATGCTGATGGTTTTGGAAGTTATGGTAC'     | 26070 | A_95_P136217 EB439884     |
| 26760 | 315 | 70 | 541  | AACTCTAGATTACATACTATTCTCCTCCTCAGGGGAATCCAACCAATTCAAGCCT      | 26074 | A_95_P028591 BP128599     |
| 26761 | 315 | 71 | 846  | GCTGGTGATGTGCTTTGCTTCCACCCATAACTTAGTTTTTGTGTTTGTATATG'       | 26076 | A_95_P292578 EB427718     |
| 26763 | 315 | 73 | 818  | CAAGAAAAACCTATAAGTTTCAGCACTTGGTTTTTCTTTGGTTTTCTTTGGCTTTGGT   | 26080 | A_95_P017226 EB438454     |
| 26764 | 315 | 74 | 2211 | GGCAGTTCAATGAAGGGTATAATTTATTGGCTCTTTGGTTTGGCATTGTGGTTAAT     | 26082 | A_95_P021031 TA11868_4097 |
| 26765 | 315 | 75 | 732  | TTTGGCTTAGGCTCATTTCAATGATGTCGAGGATTTGCTCTTATCATTTTTAGATTTG/  | 26084 | A_95_P149892 EB679884     |
| 26768 | 315 | 78 | 775  | AGTAAGGGAGACACTTCAATGTAATTTACTTTGTTTGCCAGTTTACCTAAGCCTTTC    | 26090 | A_95_P012446 TA12316_4097 |
| 26771 | 315 | 81 | 687  | TTGCCACAACAGGTCCATTTTCTACTATTCTATCTCTTATCTTACCGTGAATGGAG/    | 26096 | A_95_P303383 FG194074     |
| 26773 | 315 | 83 | 791  | CCGTCTGAAAAAGATGGCATATGTTCAATTTATTCTCAAATAATGAGTCTTTTAGTA/   | 26100 | A_95_P009361 TA12569_4097 |
| 26774 | 315 | 84 | 674  | AAAGTAAGTCAATGTTCAAGTAAATATTTGAGAAGTCGCCTGGAAGTGTGAGAAG      | 26102 | A_95_P116732 DV159518     |
| 26776 | 316 | 1  | 857  | TCTTTAATGTACTAATGTACCACCTAGGAGCCCCTGGCTTCCCCTCCTGTATTTGTT/   | 25941 | A_95_P261941 EB424703     |
| 26783 | 316 | 8  | 543  | GTATATATGTCCCAAGTTGTGGGAAAAGATATACTGCGTTGGATGCATTGCGGTTGG    | 25954 | A_95_P042116 FG140087     |
| 26790 | 316 | 15 | 832  | ATGTTTTGAGTCAATTGTGATAGAGAGATCTTGGATTGGCAATGAAGTTGGTGCTGC    | 25968 | A_95_P219162 TA21339_4097 |
| 26797 | 316 | 22 | 829  | TTATCAGTGATGGTAAAACAGCTTGTGCAGTGAGATTTATGGTTCTCCGCGCGCTT(    | 25981 | A_95_P145267 EB448874     |
| 26800 | 316 | 25 | 486  | GATGTGTCCAGTTAAATGATCCCAACAAGCTTCTTTTGGCAGGGGTTTTGGTGTT      | 25987 | A_95_P050136 FG158367     |
| 26802 | 316 | 27 | 121  | TTTCTTGTATGGTCAAGAGAATGGATGACCTCAAATGCAGTTGGTTCGGTTAGTCT(    | 25991 | A_95_P112637 CV020769     |
| 26804 | 316 | 29 | 498  | CAGTGTAAGCATGCGTGGTGAACACTACTGTAACCAACAATTGGACGTTGGGAATG(    | 25995 | A_95_P023411 BP131493     |
| 26805 | 316 | 30 | 606  | AGGGAGGAGGAACATAGAGTCTTTCAAGTTGTACATTAGACACAGAAAGTGATAA.     | 25997 | A_95_P145077 EB448622     |
| 26807 | 316 | 32 | 823  | GGATCGATGGGTTCTGGCTTTATTTTTGGGCTTATTTCATCAGATTTTGTACTAGG(    | 26001 | A_95_P254284 EH615257     |
| 26812 | 316 | 37 | 339  | GTTAAAGGTGGTTTTGACTTCTGGGTCCTTGAAGTTATGGAATTTCTGAATTGGTA     | 26009 | A_95_P095073 BP533000     |
| 26815 | 316 | 40 | 759  | GCGTTTATGATAATGTTTACCAGAGAAGGCTCAAGCTATTATGTTGCTTGTGAA/      | 26015 | A_95_P129282 FG159197     |

|       |     |    |      |                                                               |       |                           |
|-------|-----|----|------|---------------------------------------------------------------|-------|---------------------------|
| 26818 | 316 | 43 | 871  | AGACTATGTACTCTTGTTGTTTGTAGTCTGTAATAGTTGGAATTTCACTACGACCT      | 26021 | A_95_P061230 DV157623     |
| 26820 | 316 | 45 | 524  | TTCCTATGGAGTAGGTCCATTTGGGTTTTGATAAATTTGGTGTATTGATGATTGTTG     | 26025 | A_95_P134332 EB436564     |
| 26822 | 316 | 47 | 243  | ATCACGTTTCATAGGGTAAAAACGTTTAGGGCAAAATTCACAATTGCAGAATATGA      | 26029 | A_95_P213032 TA19963_4097 |
| 26823 | 316 | 48 | 1123 | TATTGGCAGTGTAAGAATGCCCTTTTATGATGCAAGGAGAGGCTATATGCCTTTGC      | 26031 | A_95_P013706 TA15324_4097 |
| 26826 | 316 | 51 | 1065 | CTGCTATCTGTCTAGACGGATGTGAGTTTGTGTAATTAATCAATAAATCTCCAGTTT     | 26037 | A_95_P034663 AY183722     |
| 26827 | 316 | 52 | 434  | ACGTGGAAATTTATAAGCTGTGAGTAGGTGGTCAACAACAACAGGAAATGAAATAC      | 26039 | A_95_P092408 BP531790     |
| 26832 | 316 | 57 | 624  | ATTAAGGAGTGATGAAACCAGAAAAGAGATGCACCTTTTGAACTCATTGTATGCAAA     | 26049 | A_95_P131437 EB431715     |
| 26834 | 316 | 59 | 812  | CTATTACTTGTTACCCGGTTTGCCATCATAATGAAGAAGAAGATGGTTATGATACTT     | 26053 | A_95_P125632 EB424725     |
| 26845 | 316 | 70 | 657  | CAAAAAATGTTCTAGTTGGTAAAGGACAAGCAACAGCCATGGCAGCTCTCAAGGAG      | 26075 | A_95_P249067 EB435358     |
| 26848 | 316 | 73 | 128  | GTACTCTTGTAAGGTGTAGTGTCTATCTTTCTAGCCACTTCAATTTAAAATATCACT     | 26081 | A_95_P121052 DW001061     |
| 26850 | 316 | 75 | 167  | GGTCTTGGACTTGGTAACATACCTCGGTTACTTTGATTTGAAAAGAAATGAATCAAATC   | 26085 | A_95_P131812 EB432223     |
| 26852 | 316 | 77 | 819  | TGTCGTTCAATGGGTTGTAATTGAATGTTATTTCTTCTTGCTACGTTCAATACTTCA     | 26089 | A_95_P206987 EB451518     |
| 26855 | 316 | 80 | 798  | ACAAGTGAAGAGTTCTCTGTTGCTAAGAATCAATCGTGGATGTTAGGCTCTGCTGTT     | 26095 | A_95_P292183 EB426797     |
| 26858 | 316 | 83 | 654  | TGAGTGAGCTTTAGAGGGAGGCTATTGTCTCTTTGTAACCATTTTGTGCATTAGTTAT    | 26101 | A_95_P001496 TA19041_4097 |
| 26872 | 317 | 12 | 650  | AGTTCCAAACCGAGGCTCTTCAGCATTGTGAAAGACATTGATATCTTTTGAGAACCA     | 26128 | A_95_P116937 DV159434     |
| 26874 | 317 | 14 | 428  | TCCAAGGGAGCGAAAACGAGGAATGAATTCAGAATTAGGGGTGGAGTTCATAAGT       | 26132 | A_95_P087893 BP529908     |
| 26880 | 317 | 20 | 791  | CATTTTCTGGCGACAGTCGTGAGTCATCCCTAATATATTGATGTTTGAACAGTTTCT     | 26144 | A_95_P013606 TA12934_4097 |
| 26883 | 317 | 23 | 294  | AGCACCTCCGGCTACTCAAATTTTATTCTATTTAGTAGAATGGCAAATGTCTTATTGTT   | 26150 | A_95_P003731 FG638754     |
| 26884 | 317 | 24 | 1560 | GTTGCAAGGATATGAGAATACCAAATGGGTATCATAGACTAATTGGGGTTGACTATA     | 26152 | A_95_P025801 TA14079_4097 |
| 26888 | 317 | 28 | 777  | ACTTGTCAAGTTGTAATGCAAGCTGATGACTTTCTAACTCTAACTGCGCCCCCTGAA     | 26160 | A_95_P117382 DV160289     |
| 26890 | 317 | 30 | 823  | GCCTATACCTGTATTCTTCTTTGAGCCTTGAAATGATCAAATTTCAATTCAGCTT       | 26164 | A_95_P207777 EB450642     |
| 26903 | 317 | 43 | 507  | AAGCCAAGAGTTGTGGAACATGATTGTGATTTCTAGTGTAAATTATTCTCATCGTTGGT   | 26189 | A_95_P221497 TA21831_4097 |
| 26905 | 317 | 45 | 393  | TATGTACCACTGTGAATGATTAATGATTCTGATTCCGACACAATTTATCCCTGTTTGT    | 26193 | A_95_P030356 TA16391_4097 |
| 26908 | 317 | 48 | 494  | TTGGTGACCTTAATGATTTACTGGAGCAAAATGAAACCAGATATATGACTTGAAAGC     | 26199 | A_95_P021891 DW001874     |
| 26914 | 317 | 54 | 538  | AAGAAATACTCATCGATTTAGGCTCCTTGTAACCACTTCTGATAAAAGCTAAAAGAGCA   | 26211 | A_95_P144967 EB448515     |
| 26915 | 317 | 55 | 2420 | CTGTCTTTTAGTCTTGTGTCAGAGTTTGGTAAGTCATTTTCAATGTAATGTCCTGTTCTGT | 26213 | A_95_P032536 AB186042     |
| 26917 | 317 | 57 | 1177 | CCAGTATTGTTCTTTTAGGAACATGGATTCTTGAGCTCTTAATGAAATTTGGGCAAA     | 26217 | A_95_P189837 TA14873_4097 |
| 26918 | 317 | 58 | 759  | TAAGGTCCAGCCTGTGTTCTGTTGTTCTGGATGAAGTACTATTTGCTACATGTCCTGT    | 26219 | A_95_P148952 EB678548     |
| 26921 | 317 | 61 | 754  | ACATCCATTTAGGCTTCATGATGCTCTAACCAATCGTTCCAAAGATCATTTCCACCTTT   | 26225 | A_95_P215442 EH619741     |
| 26925 | 317 | 65 | 181  | AGAACTCAAAAATACCACCATAAAAATGGTTGAACAAAGCAGGGTCTTAACACCCC      | 26233 | A_95_P136377 DV999293     |
| 26926 | 317 | 66 | 809  | TAACATCTGTTAATAGTTGTCTCTGTTGGGATGAACTCAACTCATGGATGCTGGGGAC    | 26235 | A_95_P126992 EB426415     |
| 26931 | 317 | 71 | 741  | GCTGCATGTTTATGTTGTAAGTACTAAGTACTGATGCTGTAAGAGGTGTGAGAATGATT   | 26245 | A_95_P010966 DV162548     |
| 26935 | 317 | 75 | 793  | TGAGATTGAATCTCTTTCGATGGTACTGACTTCTGACACTAACCCGTGCTCGCTTTC     | 26253 | A_95_P270016 FG138724     |
| 26938 | 317 | 78 | 785  | ATGCTGTGTGCCTTTCCGTCAACAGCTTATTTAGTGTACTCTGTATACGTATATCT      | 26259 | A_95_P177912 EB437975     |



|       |     |    |      |                                                              |       |                           |
|-------|-----|----|------|--------------------------------------------------------------|-------|---------------------------|
| 26939 | 317 | 79 | 552  | ACTGTGTTGTGCTTGTGCTTTTTCTGGCATTCTGAGGTAATCCAAACATTGTAATTTTT  | 26261 | A_95_P019076 DW004716     |
| 26946 | 318 | 1  | 767  | AGCTGTTGGAATCAACTGTACTCCTCCTAGATTTATTCTGGATCTTATTTCGATCCATCA | 26107 | A_95_P140372 FG138658     |
| 26951 | 318 | 6  | 1080 | TTCATAGTGAACCGACGTTTGATCAAACCTTGCTTGAGCATGATTTCGAATAAACGAC   | 26117 | A_95_P023831 TA14141_4097 |
| 26953 | 318 | 8  | 1506 | CTCTTAAACCCTAAAACCTCATATCTTGTAAGCATACTTTTGCCAAGAGATGATCTGGA/ | 26121 | A_95_P021476 TA17215_4097 |
| 26954 | 318 | 9  | 665  | GCACTTAGAAATCCTTGATCTCAATATCTTGACTAGTCTTATGTTGTTGCCCTTCAAC   | 26123 | A_95_P253369 FG642430     |
| 26955 | 318 | 10 | 361  | AATATATGCAGTTTCCATCACAATCCGTATTGTGTTTGGTTTCATGTTTATTGCCCTGA  | 26125 | A_95_P025691 DV161823     |
| 26956 | 318 | 11 | 472  | CGCTGGTAATTCTTGTAAGAAGGTGTTTGATTTATCTACCTACACATGAGGTTATTGAT. | 26127 | A_95_P191512 TA15254_4097 |
| 26957 | 318 | 12 | 584  | TTGAGGTTAGCATTCTTTCAGTCAGTGGCAATAAGCTAGTTGGTCTTAGTAGAATAG/   | 26129 | A_95_P159132 EH617084     |
| 26958 | 318 | 13 | 1008 | CTAGTGCCTTGGAGTGTGTGATGAGAAGTGTCTGTGAGAACTTGAACATCTCTTTCT    | 26131 | A_95_P009491 TA15475_4097 |
| 26961 | 318 | 16 | 805  | GTGAAGATCATAAATATTTGACGTTGAGTTCCTGCTGCTCCTGGAGTACTTTTTGCAG   | 26137 | A_95_P233319 EB679770     |
| 26963 | 318 | 18 | 693  | ATGAGCTTGAGGAGGAAGATGATATGGAAGATTTTGATGGTCTTGGAAATTAGAGAC    | 26141 | A_95_P137062 EB440802     |
| 26966 | 318 | 21 | 695  | CTGTTGGAACACCTGGACACGGCTCTAGATTGTATGATAACTGCTATGGAGAATT      | 26147 | A_95_P136972 EB440704     |
| 26968 | 318 | 23 | 549  | AGGAAAGGAAGCTCCGTTACTGTACTCTACTCCGATGTTAACCTCTCTAACGGCGAA    | 26151 | A_95_P027946 TA15227_4097 |
| 26969 | 318 | 24 | 168  | CTCCTCTTGAGATGTAGTGTAGTATCTTATCTTCTTATTGCATGACATACTTTAAGGA   | 26153 | A_95_P001411 EH619794     |
| 26970 | 318 | 25 | 311  | TTTCTTTAGGATTTGATGGAACCTTAGATTCTTAGAGCTTAAGTTAACGTTCCCTCAC   | 26155 | A_95_P048426 BP131909     |
| 26976 | 318 | 31 | 393  | TCAAGGAACATTATGCAACCATCATCAGCTATCTACAACCCTTAAAGCAATGGAAGTC   | 26167 | A_95_P097588 BP534116     |
| 26977 | 318 | 32 | 241  | GCCCCGCATGAAAGATTTTATCGATATATGAGAGTATTGTTGCTTCTTTCTATCAA     | 26169 | A_95_P003816 EB440105     |
| 26978 | 318 | 33 | 761  | ATACTCTATTACGGTCCCCTTAACCTTATGACTTGGAGTGTAGGATACCACAACGAG    | 26171 | A_95_P293824 EB451261     |
| 26980 | 318 | 35 | 442  | GAAGGAGATCTCAGTCTTGGAGTGTATATTAGGAGTTCCTTTGATTTAAACTTTGC     | 26175 | A_95_P101923 CN824929     |
| 26983 | 318 | 38 | 352  | CCGCATATTTTTCCAAGGGGATAGAATTGTGTTGGATGGTGAATGTAAGAGATTTA     | 26181 | A_95_P033191 AJ310476     |
| 26991 | 318 | 46 | 326  | AAAGCTAAAGAGAGATTTCAAAGACGGCGACAAATAGAAGCAATTAATGGTGCATG     | 26196 | A_95_P080860 DW004768     |
| 26992 | 318 | 47 | 936  | GAGTTATGAGGAATAAGTAGGAGTTAACCGTGAGATAAATTGATAGGAGGGTTAATT    | 26198 | A_95_P012031 TA14873_4097 |
| 26993 | 318 | 48 | 251  | ATGTAGACGAGCAACCTCCATTATTATCGTAAGAATAAACAGGTTCTATTTTTTCACT   | 26200 | A_95_P139232 EB442971     |
| 26994 | 318 | 49 | 116  | AGCTTATGAATGACACCAAGCGTGCTAAGAGAAGGCTGTAAGTTCTGCTTTTCTGCT    | 26202 | A_95_P034289 AJ718369     |
| 26996 | 318 | 51 | 921  | TCACTACTTTTTGGCTTATATAAATGAAGGGACACTCTGCCTTCTCATGTTTCTCGTCC  | 26206 | A_95_P185227 TA13867_4097 |
| 26998 | 318 | 53 | 319  | ATAGGGAAGAAAGAACTCTTAAGGATCTGCACTGAAAGAGAATTCTTGCTAATGAAC    | 26210 | A_95_P081535 BP528280     |
| 27003 | 318 | 58 | 841  | GATAGGCACACAATCATCATGCTCAAATGGACTGCGTTTTCTGTAGAATGATGATTGC   | 26220 | A_95_P224337 EB439249     |
| 27008 | 318 | 63 | 128  | TGATGGTCACTTTGTCTTTGATGTCTGTTCCCAAAAACCTATCCTGATGTGCCACCG/   | 26230 | A_95_P225942 EB424860     |
| 27011 | 318 | 66 | 516  | TGAGTAGTAGGTCGTGATTTTTTACCTTTTGTGCCAGGTGTTTCAATGTAAAAATA     | 26236 | A_95_P265541 AM790765     |
| 27014 | 318 | 69 | 310  | GGGTGGCGGGAGATGAAGATGAGGAAGATATTGACGATATTGAACACGAATTCAA/     | 26242 | A_95_P129187 EB428913     |
| 27017 | 318 | 72 | 1226 | ATATGATGTTACTGTTGGACTGTAAGCATTGGGCTTTAAAGACTTTAAGCATTGGGC    | 26248 | A_95_P208407 TA18962_4097 |
| 27021 | 318 | 76 | 489  | GATCGTCGAAGGAACATAAGGTAGGGTGGTACGATCTAGTGATAATGAAAGGACTT     | 26256 | A_95_P267236 AM793576     |
| 27023 | 318 | 78 | 685  | TTACCGAGGCAGAGAGCGTTTTGTTTATATGTAGAATGATGACACAATTGATCTATTT/  | 26260 | A_95_P254484 FG190707     |
| 27025 | 318 | 80 | 459  | ACATTGCAAAAAGGGTGTATGATGCTAGGCTGCATCGATGTGGCAGAGTATAGAGT     | 26264 | A_95_P076360 BP526964     |

|       |     |    |      |                                                               |       |              |              |
|-------|-----|----|------|---------------------------------------------------------------|-------|--------------|--------------|
| 27026 | 318 | 81 | 726  | GTGTTTTTTACCTCATATGTACTTTTCAGATAATCTTCCCTGTTTTGCATGGAATTTGA(  | 26266 | A_95_P278268 | FG635823     |
| 27027 | 318 | 82 | 149  | AATTTGAGATATATCTCACGATTGGAAGGTTCTGGGAAGGATTGGCTGGATGGATG1     | 26268 | A_95_P157452 | EH615510     |
| 27028 | 318 | 83 | 815  | AGTCATTCCTCGAGGGGGATGATGCTATGGAGCGTACTCTTCATATTCCTCAAGATTA    | 26270 | A_95_P243052 | FG139530     |
| 27029 | 318 | 84 | 1467 | TAATTTTGGTAGTGGCAAAAATTCAGTGTAGCCTTGAGTGGAAAGTTCTGAGAGCGC     | 26272 | A_95_P247657 | EU375458     |
| 27031 | 319 | 1  | 1470 | GATCAACCACTGTGAACCTAATCTTCCAGGCTTCTCTGTGTGTATATTGTTTTCTTTCT(  | 26275 | A_95_P152062 | TA15973_4097 |
| 27032 | 319 | 2  | 519  | TTTTGGTCATTCAACTTCTATTGAATTGTTGAAGAGGAGCACTTAAAGGATGTGCTT     | 26277 | A_95_P155932 | EG650331     |
| 27035 | 319 | 5  | 421  | CGACTTTTGGGAGCTAATACAATTTGTACGCTGAAGTTTTGCTGGTAACTCCAATAAT    | 26283 | A_95_P286073 | FS408169     |
| 27036 | 319 | 6  | 866  | AGCTGTTTGAGTCGATCAGATGCACTGTACTGCTGTGCTGACTGATGAGAAAAATCTI    | 26285 | A_95_P235104 | FG142893     |
| 27042 | 319 | 12 | 106  | GAAGTATCAGAGAGGTAGAAGACACGACTCTGATAATGATGATAGTAATGATCTTG/     | 26297 | A_95_P119242 | DV162344     |
| 27044 | 319 | 14 | 737  | ACACATTGAAAGCAAGAATTTGGATGTTGCTGTGAAGCAACTTGACAGGAATGGTTT     | 26301 | A_95_P316743 | FG194017     |
| 27048 | 319 | 18 | 301  | AAAGTTGGGCTTTCTTAATTGGGCTTTAAATTTGTAGTGTCTTTCTTTCTCTGGGTCC    | 26309 | A_95_P213882 | TA20142_4097 |
| 27049 | 319 | 19 | 603  | TAGCCTTGTCGATATTATGGAGTGATTATCAGAAGCTTCTTTGTTTCGGAAATTATTGAA/ | 26311 | A_95_P242942 | EB447309     |
| 27050 | 319 | 20 | 1701 | CTGTATCTGCACATTTATTGATTGTATTGCAAAGAGCTTGAAATCAACTACAGTTCTC(   | 26313 | A_95_P259986 | AB286961     |
| 27051 | 319 | 21 | 603  | TCATCAGACATCTCGCTTTGAAACAGCCATTCAAGCTGTTGACATGTGGTTGCCACA     | 26315 | A_95_P127327 | FG174896     |
| 27052 | 319 | 22 | 488  | TCCTGTTTGATGAAGGATTAATTGCCTTAAGCTGGTGCAATGGGATAACTACCTGCA/    | 26317 | A_95_P275918 | AM788420     |
| 27060 | 319 | 30 | 867  | TTGTGCGATTACTTTAACAATCTCTTTGGAGGCACCAAGTTTTTATTGAAGCTGATG     | 26333 | A_95_P248877 | EB679127     |
| 27064 | 319 | 34 | 461  | TTTTCAACATCTCCTGCCCTTGACGATTCTGTCCAGATAAAGTAACAGCTGAATAAC     | 26340 | A_95_P278488 | AM802537     |
| 27065 | 319 | 35 | 388  | CCACAGATGAGAGTGGGTTAGATGTTAGTTACTAGATTTCTAATCCACTGTATATTG     | 26342 | A_95_P211132 | TA19545_4097 |
| 27068 | 319 | 38 | 199  | GGAGAGGGATTAAGTCGCATTTCTGTTTCTTCAAGGTGTTTGATAAAGTAAGATGTT     | 26348 | A_95_P093603 | BP532331     |
| 27069 | 319 | 39 | 596  | TATATTTGTAATGAATTCATATCGTCGATCCAGGAATGTAATATCACCGAGCAAGCTG    | 26350 | A_95_P300453 | FG638254     |
| 27075 | 319 | 45 | 700  | TACAGAAAAGAAAAGAGGAGACTTTGCTGAAATAGGAGGGGCACACAGTTCATGG(      | 26362 | A_95_P135797 | EB439356     |
| 27077 | 319 | 47 | 418  | ACTTCATTAATTTGATTATGAAGAAGCACGAAAGGACATCAGCGAAGGACAACGA(      | 26366 | A_95_P072845 | BP526066     |
| 27082 | 319 | 52 | 674  | GTTGACCTCGTCCTTGATCCATGTTGTGTAATAATGTATATTGTAAGACCTAACATAA(   | 26375 | A_95_P295583 | EB446978     |
| 27083 | 319 | 53 | 1558 | TATTATATGTGAACCTGTCAATTATCTCCTGAGGTGAAAGAGTCCTTCAGGGAATAGT    | 26377 | A_95_P007981 | AF127243     |
| 27085 | 319 | 55 | 854  | TGATGGCTATCTGGATCATACTGTAAAAGCTTAAACTCATATGATATCTTCCCTGTGC/   | 26381 | A_95_P289148 | DV157860     |
| 27090 | 319 | 60 | 789  | TTCAAGATGCTTGATGAGCCTTGGGTATGGCAGCCATATCCACTAGCATATGAGA(      | 26391 | A_95_P281573 | FG159896     |
| 27093 | 319 | 63 | 490  | ACAAGAAGATCAGGGATCGAGCAGCAACATTTAATCACATGATGAATTACGTAGAA/     | 26397 | A_95_P054261 | BP133390     |
| 27097 | 319 | 67 | 1474 | TTAATGCTCTTCTCCTTCTCTCATGTAATAGAAAATAGATGTGTGGACAAAAATCGGAG   | 26405 | A_95_P218912 | TA21283_4097 |
| 27098 | 319 | 68 | 490  | TCTTTCAGCCTCAAGCATTGGAACCTATGTGCAAGGAAAGTTGCTTCTGCATCCGGAG/   | 26407 | A_95_P006926 | NP917038     |
| 27103 | 319 | 73 | 837  | AATGTTGTTCCCATCCAGGAGCCAAAAATGCAGATCAAGCTAAAGAATTTGCTGGT(     | 26417 | A_95_P290578 | DW000445     |
| 27112 | 319 | 82 | 651  | ACACCTTGGAACCTGGAATAGTATGAAAAATATCCGTGCCATGCTAGGCACATAATT     | 26435 | A_95_P252414 | FG645435     |
| 27113 | 319 | 83 | 749  | GGCTGGTATATGTTTCTTTCAGGTGTGCATGGATTATAATCTATTAATGGGTTAATA     | 26437 | A_95_P016931 | TA16516_4097 |
| 27115 | 319 | 85 | 284  | TCTCTATGCCTGTTTCTCATCTCAAAAAGTGAACCGTTTAATTAGGTGCCAAACATC     | 26441 | A_95_P109862 | FS416927     |
| 27120 | 320 | 5  | 243  | CCCTGATTTGGTAAAGGGAATTTTGGTACCTCTCAATAAATTTGATCCCAAATTTAT     | 26284 | A_95_P142807 | EB446228     |

|       |     |    |      |                                                              |       |                           |
|-------|-----|----|------|--------------------------------------------------------------|-------|---------------------------|
| 27127 | 320 | 12 | 223  | TCACTGGAGACAGACATACTGTGTCAATCTTTTGGCTATTATGGATGAATCTCAATTG   | 26298 | A_95_P089383 BP530479     |
| 27135 | 320 | 20 | 813  | TGATCTTGGATGGATTTTTGCTTCCTCAGATTCTGTTTCATTGTGTTCTGTAACACTACT | 26314 | A_95_P254154 EB426002     |
| 27136 | 320 | 21 | 451  | GCCATAGACAATAATCTTGTACATCAGGTCATCCAGGGAAAAAGCTAATTTAGTTTC    | 26316 | A_95_P022716 EH623214     |
| 27138 | 320 | 23 | 652  | CCCAATTTGGGGTGTAGGATTGATGATGATAATGTCATTGATGTTAAATTCTACCCT    | 26320 | A_95_P285698 EH622264     |
| 27141 | 320 | 26 | 399  | TCACAGATCTGGTTGACTACTTTCTCTGACTGCTTAGGTTGAGTCACACATTTTCTGC   | 26326 | A_95_P106058 CV017736     |
| 27152 | 320 | 37 | 1153 | CCATCTGCCATGCTTTTATTTGATGCAGTTGCATTGTACCTTAAATTCACCTGGTTCTC  | 26347 | A_95_P027941 TA16625_4097 |
| 27154 | 320 | 39 | 148  | GGTCCTGAGTAATCTAAATTTTTGTTTCATTTTTTCCCCTCAACACAGATAGGCAATTT  | 26351 | A_95_P094243 BP532623     |
| 27155 | 320 | 40 | 501  | AACAAATGTGCATACTTTCTGACAAGCAAATGTCGCAGACATGGGCGAAGATCTGCT    | 26353 | A_95_P055016 BP133585     |
| 27156 | 320 | 41 | 798  | CGGCACTTAACTGTTGTAATCTTCCGATTTTTACGTTTGATTCCGGCTCTGTAGTTGGT  | 26355 | A_95_P152642 EB682971     |
| 27165 | 320 | 50 | 176  | CTTTTGGGCAGCTCGTCTTAAATTCATGTACATATTGGATACTATACTTAACTGTTAT   | 26372 | A_95_P103837 CV016717     |
| 27167 | 320 | 52 | 331  | GAATCTTCTCTGTAGTTAAGGCTAGTGACCGCGTTTGTCTGCCATTTCTACCGTGAC    | 26376 | A_95_P104452 TA15278_4097 |
| 27170 | 320 | 55 | 921  | TTCGGGACATGGGAGTTCCGACCCTGTGGATTTGGAAAATCCATTTCTAACAAATGAA   | 26382 | A_95_P248027 EB679219     |
| 27174 | 320 | 59 | 619  | GGATGGATAGGTGAAGACAGTGGCATGTTGCTAAATACTGTTAAAATCACATTTTGT    | 26390 | A_95_P261876 BP133832     |
| 27180 | 320 | 65 | 464  | TGACTGGAGCCCAAATTTTCCATTAGGATCATGAGTCGGATCCTAACTTGAGGAATA    | 26402 | A_95_P052976 FG163875     |
| 27184 | 320 | 69 | 724  | GCTTGTTACCAACTGGCAACTGGTATGGAAAGTGTGTTAGAGAAATACATAGGAAATT   | 26410 | A_95_P299103 FG645413     |
| 27188 | 320 | 73 | 346  | CTTGGTCACGCATACTGTTTTTAAATGAATCGAAAAAGAAAGTAGTTGCCTCTCAT     | 26418 | A_95_P308473 FG642531     |
| 27189 | 320 | 74 | 1123 | CTGTGCTATAGTTGCAGCAACTGTTAACAAGGAGATTATTTTTATATCCTGTAATAG    | 26420 | A_95_P196402 TA16330_4097 |
| 27190 | 320 | 75 | 801  | ACGCAACTATTATGAAGTTCATTGAGAGGCCATTGTCAGAAAAATGAGCGCTTCATGC   | 26422 | A_95_P144847 EB448369     |
| 27195 | 320 | 80 | 391  | GTCCAGCAGTAAAATACATGTAACCTATTAGATGATCCATGATCGTAGTATGGTATT    | 26432 | A_95_P077090 BP527163     |
| 27203 | 321 | 3  | 529  | GCATTATGAATCACCTTAAAGGGAGCCGTGATTTTCTCGTTTACGAATAGGGCATT     | 26447 | A_95_P157407 EH615476     |
| 27208 | 321 | 8  | 845  | CCTAGTGCTATTGTTGATGAGATGAGGAAGTCATTGATCGACAGTTACGTTTGAGTT    | 26457 | A_95_P224967 EB426172     |
| 27210 | 321 | 10 | 744  | AGATGTTTGTTACTACTATGGGTTATAGTTTCTCTGTCCAGTTTCTAGTGAACACGTA   | 26461 | A_95_P161247 EH619997     |
| 27211 | 321 | 11 | 293  | ATGAACTGTTTAGGCAAAGGAGAATCTTAGCAACAGGGTAACATTGGAAGCATGAA     | 26463 | A_95_P075630 FS424594     |
| 27215 | 321 | 15 | 480  | GATGGTAATATTATGTTCTTTTATGTTAGTTTGCTTTGAGGGATGTCATCTTGAGGA    | 26471 | A_95_P061055 BP135165     |
| 27218 | 321 | 18 | 852  | AAGTATGCCGGTGTCTTGATGGTCTAGGTGTTGTTGAGAATGGACAGAATGTCCAT     | 26476 | A_95_P235064 DV999544     |
| 27225 | 321 | 25 | 217  | TAATAGAGAAGGGAGGGTGGCCTAATGCGGACACATCATAGCCTTTAATTACAGCTT    | 26490 | A_95_P133597 EB435245     |
| 27227 | 321 | 27 | 514  | TGGATGGTCACTCAAATCCCAAAGTTCAGATCATCGGGTTCAAGATGACGCCAATAT    | 26494 | A_95_P071875 BP525812     |
| 27229 | 321 | 29 | 520  | CGTGCACTTGTGACTCCAGTTCTGGGATGGTATTTAGATATCGCGATTTTATGGAGA    | 26498 | A_95_P253444 EH622203     |
| 27238 | 321 | 38 | 876  | AGTTGAAATTAGGTCATAGGGATCGTCGTATGGGGACTTGAACATGTAAAATGAA      | 26516 | A_95_P198597 TA16813_4097 |
| 27239 | 321 | 39 | 649  | GCAGAGTTGTTACATATATTCAAGAACAGCTGATTTGAGTTATTACTGTGTATCAGT    | 26518 | A_95_P122737 DW002697     |
| 27240 | 321 | 40 | 846  | GATCCATAATGCATTTGCTTTCTGGGACTGGTAGAGTCGATATAGTGTCTGCATGCA    | 26520 | A_95_P270086 FG134963     |
| 27241 | 321 | 41 | 467  | GTGCCCTGACTTCTATTTAGATTGTGATTCTGCTATAGGTATATTCGACATGGTTTCA   | 26522 | A_95_P122607 FG638986     |
| 27242 | 321 | 42 | 777  | TTAATAGCCCAATGGTTAATCCAGTTTTCAGAAAATGCCAAGCTTGTCTGATTAAGT    | 26524 | A_95_P162577 EH621517     |
| 27244 | 321 | 44 | 372  | AAAGGCGAATCTGAGCCTACCCATTACTTTGATTTTGTGTTTCCCTATGCTCC        | 26528 | A_95_P076620 BP527032     |

|       |     |    |      |                                                             |       |              |              |
|-------|-----|----|------|-------------------------------------------------------------|-------|--------------|--------------|
| 27249 | 321 | 49 | 80   | TTATACTAATGTAAAGAACTACGTTTGGGCTTGATCCCCATAGGAGCTTAGCCCGGGC  | 26538 | A_95_P034344 | AJ718492     |
| 27252 | 321 | 52 | 832  | TTGCTAGATGAATCGTGGGTGCTGACCTCCATTTCTGTTCAATTCTTCCATTCTTTC   | 26544 | A_95_P119417 | DV162624     |
| 27257 | 321 | 57 | 739  | ACTTCTGATTCTTTGTTCTCCATCCAACCCAACAGGGTCTGTTTACCCTCGGAAATTGC | 26553 | A_95_P151137 | EB427488     |
| 27265 | 321 | 65 | 834  | TCTATACATGGCAATGACCGAATTTGAAAAGCTTTCTGAAGTACCTGATTGGTCATTT  | 26569 | A_95_P236214 | DV159985     |
| 27268 | 321 | 68 | 755  | GCTGAAATTGTTGTGGATTATCCCATAAGAAGGTAAGTATTGTGCATCGGGGATCA    | 26575 | A_95_P127947 | EB427526     |
| 27273 | 321 | 73 | 777  | TAAACATAGGATGCATTTGTACCATTTAATGGATGCTTGGATTGGGTAGTAAAAG     | 26585 | A_95_P014376 | EB442889     |
| 27275 | 321 | 75 | 146  | TTGAATAACACCTCTTGCATATGCCTAGTTTAGGCTAAGTAGTCCAGTTGTTTTAAA/  | 26589 | A_95_P099528 | BP534960     |
| 27276 | 321 | 76 | 851  | GTCAAAGTTGCTGAAGCCTGATCCGGAAGTGGCTGATACAATTTATAAAAAGTGCTC   | 26591 | A_95_P294658 | EB441989     |
| 27277 | 321 | 77 | 275  | TATTATGTAGCTTTTGTGCTGTTGCTGTGGGACTCCTTGTATTCTGGAGGTGATA/    | 26593 | A_95_P266121 | TA21591_4097 |
| 27283 | 321 | 83 | 310  | CTGGTTCATCTTGTAAAGTCACTCGAAGCATGAATGCAAAGATGAGAAAAGATTTGAAG | 26605 | A_95_P094933 | BP532936     |
| 27285 | 321 | 85 | 797  | AGTTGGAGAAGGCTGGATTTCTGTTGATCTTGATAAATGCAGTTGTAGCTGCAGCTA   | 26608 | A_95_P252499 | DV158177     |
| 27288 | 322 | 3  | 1021 | GGAAGGCGAAACGAAATTCTGTTTCAGTAATTTCCACCTTTCTTTTCTTTTCTTCTC   | 26448 | A_95_P240144 | AJ966359     |
| 27289 | 322 | 4  | 411  | TTGGGTTCCACAGTTTCAATGTGTGGTACTCGTTCCACATATTGTAATAATGTCAAAT  | 26450 | A_95_P130312 | EB430338     |
| 27291 | 322 | 6  | 865  | CTCGAATAGAAGACTGTTACATTGTCTCTGGAGATGATTGTATTGCTGTTAAGAGTGC  | 26454 | A_95_P152312 | EB682654     |
| 27292 | 322 | 7  | 806  | GAATTGTTTAGTTTGAATTGTCTAAGGAAGCAGTTCTTAAGTCTCTTCTCTGATAC    | 26456 | A_95_P273051 | DV999793     |
| 27294 | 322 | 9  | 423  | GAGAGAAGCTACTGTGATGTCGATATCCCTCTTAATCAGCTCGGATTGATGAAGAA    | 26460 | A_95_P263898 | BP525566     |
| 27298 | 322 | 13 | 814  | GCTACTGGTGTGCTATGTGCTGTTTGTAGAAGTAGGAGTGAGATTTATTTAATA/     | 26468 | A_95_P149782 | EB679746     |
| 27299 | 322 | 14 | 503  | AAGCATTCTTCGGATATTCTGGAGTTTGTCTCAACTAATGATAGAAGGATTCAAGTTT  | 26470 | A_95_P022091 | TA12410_4097 |
| 27309 | 322 | 24 | 807  | ACGATGATTTCTGTTGTAATTTATACATTGTCTCAATGTGATTTTCTCGTCCAGGTT   | 26489 | A_95_P214737 | EB677283     |
| 27313 | 322 | 28 | 664  | GTTGGAGGCATGTTGAAAATGTTCAATAAGTGTAAAGTTCTAATTTAGCGACGTCCTA  | 26497 | A_95_P271971 | EB446553     |
| 27319 | 322 | 34 | 511  | ATTCATATTGGCTTCTTTAACGTGTACATAGTCTTATGAATATTGGACGTGCACTATTC | 26509 | A_95_P205602 | TA18325_4097 |
| 27320 | 322 | 35 | 558  | ATACTAAGCCCTGGGGAACCTCACTAAAAATCTCACGATGAACGTAGACGCCTCAGG   | 26511 | A_95_P006306 | TA15420_4097 |
| 27321 | 322 | 36 | 232  | AGAATTAGGGTTTGGATGTGATCTGCTGTTGTTTTGGGTTTGTGTAATGCTCGTGC    | 26513 | A_95_P161877 | EH620463     |
| 27322 | 322 | 37 | 156  | ACGCCGATGATTCAAAGTACAGAATGTTGATATGTACCATTTGCCTCTTGTTAATA    | 26515 | A_95_P109282 | EH618781     |
| 27323 | 322 | 38 | 2807 | AGTTTGATGAATGGTGTGGTAAGGGTGAAATGTTTTGCAGAATTCAGAAGAACA      | 26517 | A_95_P227669 | X83729       |
| 27325 | 322 | 40 | 518  | CAAAACCATTTCCAGTTAAATGCTATTTGGACAACCTCTCGTCTCGCTTGCAACTGG/  | 26521 | A_95_P223492 | FG635017     |
| 27336 | 322 | 51 | 784  | TTGAAGATATTGTTCTGTCAGCAAAGAGGGCAAGTTACAGAGCAGCAAATCAGTT     | 26543 | A_95_P117512 | DV160439     |
| 27337 | 322 | 52 | 890  | TGATAGAAGTTGTTAAAGGTTCAACAAAGGAGAAGGTGCTACGGGTCGTACATCTTG/  | 26545 | A_95_P292673 | EB428039     |
| 27344 | 322 | 59 | 293  | TGGACTTTCAACAGATCCAGAAACCTTTGCCAAGAACCGTGAACCTCGAGGTGATCCA  | 26558 | A_95_P105167 | CV017332     |
| 27345 | 322 | 60 | 365  | TTAGGAGTGTCTCACGCTTAAAAATTGTTTTCTGTTTCTCAATAGAAGGTTTCTTT    | 26560 | A_95_P307253 | FG638033     |
| 27347 | 322 | 62 | 632  | TTTTGTGCTGATTTCAATTTAGCAAGGTTGTGGTACCCTGCTGTGCTCCAACATAG    | 26564 | A_95_P284258 | FG642918     |
| 27349 | 322 | 64 | 728  | CATGTTCAATTATCTATTGGTCTAGGACAATCTGTACTTCACATGATACACAGTTAACT | 26568 | A_95_P017136 | EB683285     |
| 27350 | 322 | 65 | 686  | GGTTCATTTGCTCGTGAATTGCTGAAATTTCTTATCGATATAAACTCCAATTTGCAGC  | 26570 | A_95_P149092 | EB678740     |
| 27353 | 322 | 68 | 1077 | GTTGATGCACAATTACTTGTCTCAGTTTGTGTTGTTAATGTCAAAGCTGTTTATGC    | 26576 | A_95_P194767 | TA15970_4097 |

|       |     |    |      |                                                              |       |                           |
|-------|-----|----|------|--------------------------------------------------------------|-------|---------------------------|
| 27354 | 322 | 69 | 806  | CTTACATTGCTCTTGACTATGACAGACTTGAACAGCAAGACAGCTCATCGTGGAGAA    | 26578 | A_95_P309458 FG133347     |
| 27359 | 322 | 74 | 435  | ATTGCTGATACTGTGTATTAATAATGATTCTCCCTTGGTTATCCAGGGGTGCTGTAA    | 26588 | A_95_P212667 TA19884_4097 |
| 27364 | 322 | 79 | 475  | CATAGATTAGCTGGTATCTGTTATGTCTTCTTATCAGTAGTTCTTGATGTACTAGAA    | 26598 | A_95_P094853 BP532903     |
| 27366 | 322 | 81 | 1113 | GTGGTCTGATTATGTAATTTAGACCTAGGTTTGCTATGTACTGTGACTTAGAGATCA    | 26602 | A_95_P212132 TA19764_4097 |
| 27370 | 322 | 85 | 673  | GAGCCAACTCCATTGTTACGTTGCTGTGACACTTATATGATTCTTTGTGGTTTCATTT   | 26609 | A_95_P003441 FG643518     |
| 27371 | 323 | 1  | 1414 | AATTGACGTTGTTGAGGCACTCTTGTCGTGTTCTTTCTTTCTTGTAAACCAAGGCGG    | 26610 | A_95_P239759 AJ006974     |
| 27372 | 323 | 2  | 930  | GTCGATGTATATTGTAATACAATATAGATGAATGCATGTGCAGACTAGTGAGCTTGG    | 26612 | A_95_P008261 TA12823_4097 |
| 27373 | 323 | 3  | 1087 | CAAAAGATTTCCACTGTTCTCTCTCGAGTATTTATTAGTTACTACAACTTGATCTTGC   | 26614 | A_95_P196947 TA16454_4097 |
| 27374 | 323 | 4  | 730  | ACCCCGAATTACGCGACAAGTTGCACAAAACAAGGCTGCATATTGGGCAATTAGTG     | 26616 | A_95_P121112 DW001113     |
| 27378 | 323 | 8  | 441  | TCTGCAGTCCACGGAGGAAATGATGATATGATGGATGATCTTGATGAGATGATTTTT    | 26623 | A_95_P093848 BP532446     |
| 27381 | 323 | 11 | 563  | GTTTGGATGGACTCCAACACATGTAGACTTTTCATGTATCTTGACCGGCATGAAATATA  | 26629 | A_95_P221757 TA21887_4097 |
| 27382 | 323 | 12 | 742  | TGATGCATGATGATATCAAAGGAGGAACGTGTATACCTGTAATATTCTCTTTTTTGG    | 26631 | A_95_P215077 EB426699     |
| 27383 | 323 | 13 | 696  | ACATTAGAGACGACGAAGCAGAGCATTGTAAGACAATGAAAGCCTGTCAAACGCAT     | 26633 | A_95_P126337 EB425680     |
| 27387 | 323 | 17 | 2117 | GTTGTGTATTTCATGAAATATTTTCATTATGTTAGCGTGAATAAGCTAGGGAGCTCTGCA | 26641 | A_95_P252079 DQ923119     |
| 27388 | 323 | 18 | 392  | CTTCCAGCACAAATTTTCCAACCTGACGGGACAGTGATATGATGTGAAATAAATCCC    | 26643 | A_95_P155097 EG649896     |
| 27392 | 323 | 22 | 828  | ATCGGGGCAAGTATGGAGGAGATTACTGCTGCTGTTAAAGATGCTGTCACGAAAG      | 26651 | A_95_P268096 DV999530     |
| 27395 | 323 | 25 | 516  | ATTACCAGATTCCTTTGACTTGCTGATTTTCACATAGTAAAGAGTTGGTCATGGTT     | 26657 | A_95_P123222 DW003094     |
| 27396 | 323 | 26 | 795  | AAGGAATTGATCGTGACTTTGAACCTGTTCTTTCCATGACCCCTCTTAATTGAGATGA   | 26659 | A_95_P268181 DV999785     |
| 27401 | 323 | 31 | 478  | CAGAACATTGTCAAGAGAAAAAATGAAAGCGACAAGTGGTATTCTTACCCAATGTTG    | 26669 | A_95_P274843 TC64030      |
| 27403 | 323 | 33 | 705  | AGACTTCTACTAAAAGCTGTTTGCCTTTGAAGGCTTAAATTTTGTATGGATACTTG     | 26673 | A_95_P015021 EB677251     |
| 27405 | 323 | 35 | 1176 | GACTGCTTTATCCAATGGATGGGAAGATTCTTTTAGCTGAATAAGCTATGTACTTCA    | 26677 | A_95_P250542 AJ299250     |
| 27410 | 323 | 40 | 578  | GTTTACAGTTGATGCTATAGTGAATTTACCAACTACTTTTCAAGAGTTTCTGGGAC     | 26687 | A_95_P152867 EB683193     |
| 27413 | 323 | 43 | 553  | GGTCCCTGTTCAAGTCGTCGGTCCAAGATTTGGGTCCTAGATTTTTTTCAGGGTTCAAT  | 26693 | A_95_P091738 BP531480     |
| 27419 | 323 | 49 | 815  | ATTGGACTCACACGGATTGTGCAATTCGTGATAACAGTTGGACAGTGCTTCTCCTGT    | 26705 | A_95_P294648 FG160522     |
| 27421 | 323 | 51 | 1099 | GAGGGATGGCTATCCTCTCGATTCTATAACGTTTTCGATTTATAATAACTACTAGTACT  | 26709 | A_95_P029216 TA16407_4097 |
| 27422 | 323 | 52 | 791  | ATGATGAAACATTCAGACACATGGCTAGCATCTACAGTCATTCCCACCATAACATGTC   | 26711 | A_95_P137407 EB441150     |
| 27423 | 323 | 53 | 820  | TTCCAAGGCTACAGTGAGGGATGGCACTATATTAGCACAAAAGTGTGTAGGAGTTG     | 26713 | A_95_P233679 DV159023     |
| 27424 | 323 | 54 | 782  | TTTGAGAGGATATGGTAGCTTCTCTTGTGTATATATGATGGTGGGTGAAGAAGAAA     | 26715 | A_95_P159262 EH617285     |
| 27427 | 323 | 57 | 361  | AGTCAGATGATGACATGGGCTTCACTCTCTTTCGATTAGAAGAATCCTAAGAATTCAG   | 26721 | A_95_P204212 TA18018_4097 |
| 27429 | 323 | 59 | 923  | TCGCTATAGCATTGAAGCAAGTGGCTACTCCTGAATACAAGACATATATGCAACAAG    | 26725 | A_95_P020546 DV161209     |
| 27430 | 323 | 60 | 569  | AACTCAAGGGAAAGGTTGAATTGTGGCCCTCTGTAATACTTAATTTTCTTATGTT      | 26727 | A_95_P178072 TA12136_4097 |
| 27436 | 323 | 66 | 800  | AGCCAACGCATCAAGGGGATATTGCCATGTTAGGAACTGTTTTGGATCAGTAAAG      | 26739 | A_95_P027546 EB679862     |
| 27437 | 323 | 67 | 541  | AGTTGTACAGGTCACCCGAAATACATGTTAGTAGTTGGAAAATTCTCAACGATGAGAA   | 26741 | A_95_P261971 AM780931     |
| 27441 | 323 | 71 | 1387 | TGTTTGCATTTGGCTGTAGACATAGTGATGATTCTTATCAAATGCATCACATTCACAC   | 26749 | A_95_P033151 AJ271749     |

|       |     |    |      |                                                              |       |              |              |
|-------|-----|----|------|--------------------------------------------------------------|-------|--------------|--------------|
| 27444 | 323 | 74 | 807  | CTTGTCTGAATAATAGTCACTCGTGTAGTCTGAGTTTTGAATTGCCAAATGCAAATA    | 26754 | A_95_P010201 | EB425536     |
| 27448 | 323 | 78 | 1731 | GTTTCAGTCCGTATATTCGCTTGCTTGTAACTGTAATTCGGCATGCCTGCCATTTTT    | 26761 | A_95_P249782 | AM851010     |
| 27452 | 323 | 82 | 463  | AGCTATTGGAGAGAATAAAGCCACAAATTCCTCATCACTCATCTATGTAATTGTCTGT   | 26769 | A_95_P103622 | CV016607     |
| 27453 | 323 | 83 | 850  | ATTATGCAAGCCAAGGATTACAAATTTCTCTCTTAGGCATCTCTCGTATGGCACACAT   | 26771 | A_95_P205857 | EB425159     |
| 27454 | 323 | 84 | 448  | AGAGTGTTAAGGATGGGTGTTAGCAGCTAGGTTTTTTCCTAATATATCTTGCTTTTCAG  | 26773 | A_95_P062140 | BP135438     |
| 27456 | 324 | 1  | 798  | GGCTTGTTTTGCTAAGATAAATTGAATAGCATGCAGTAACTGTTGGTGTGTTTGTCTAAT | 26611 | A_95_P288558 | DW000475     |
| 27458 | 324 | 3  | 497  | AGGTGCTCTTTTTCAGGGTCTCTGGGATACTTGATGTCTGATAAAATGGAGATTCCTC   | 26615 | A_95_P072295 | BP525927     |
| 27465 | 324 | 10 | 519  | CAAGGAAGCAGAGAGTAAACGAAATGAATTAATACTCAAATTCCTGAACGCAAGTTATG/ | 26628 | A_95_P071705 | BP525771     |
| 27467 | 324 | 12 | 922  | GAAGGGGAGAACAAAGGATTTTTCTGATAACGGATTTGAAATGGAATTTTTGTTGTCT   | 26632 | A_95_P194867 | TA15995_4097 |
| 27472 | 324 | 17 | 480  | CATGTTTCAGAAAGCCGAAAGATAAGACATGTAATCTGACAATCTAAAGCTTCTCC/    | 26642 | A_95_P094478 | BP532735     |
| 27473 | 324 | 18 | 1008 | AAGAGCTCTTGAGCAATGCACCTAAGATAACTAGGATTTGCTGTTTCGAATGAATATC   | 26644 | A_95_P121527 | TA17173_4097 |
| 27476 | 324 | 21 | 275  | CTAAACTAATGATTGAGTTTCCATCTATGTTTGGGTTTTCTGTGAGCCACACAACCCG/  | 26650 | A_95_P159182 | AF205130     |
| 27481 | 324 | 26 | 405  | CTTTGGTGCCTGAGATTGCTCATATGTACAAAAGTATAAAAGCAAGTACGAAGCCA     | 26660 | A_95_P108693 | CV020487     |
| 27482 | 324 | 27 | 805  | CCAAGTTATTCTGGAGAATATGGTTTTATTGCTCAACTGAATGAGGGAAGGCACC      | 26662 | A_95_P010601 | TA12117_4097 |
| 27490 | 324 | 35 | 542  | GTTGAATGTGAAACAGAATAAATAATGCTTTTTCGTCCGGGACTAATAAATATGTTG/   | 26678 | A_95_P025471 | FG633777     |
| 27491 | 324 | 36 | 688  | GAAGCGAAGAACTACACATCAATTGAAAAGAACCAAGATGGTCTGCCTACTGATAT     | 26680 | A_95_P055226 | EB425809     |
| 27492 | 324 | 37 | 494  | TTACATGCTCTACTTTCTCTCACACAGCTTGCTTCAGCAATTTCTGGCTTTGCCAGCAA  | 26682 | A_95_P276623 | AM789086     |
| 27494 | 324 | 39 | 738  | TTTACGAGAATGAAGCTACTCAGGCAAACTCTGGGATATACTTGCTGTCTATGCCTC    | 26686 | A_95_P003531 | FG635366     |
| 27497 | 324 | 42 | 113  | TCATTCCGGATGCAGCTCCTGGCTTCGTGATATGCTGCAATATTTTGTATATAACA/    | 26692 | A_95_P044901 | BP130999     |
| 27502 | 324 | 47 | 115  | GGTAGCCAATCTTTGATTGGAAGCTGATGGTTGTATATTGAACTTTTTCAGAGTAAC    | 26702 | A_95_P125852 | EB424946     |
| 27508 | 324 | 53 | 400  | ACTGGATTGGGCTTGTCTTTGGATAATGGACGTTTGGTTTCATGTGGTGACTIONAGCA  | 26714 | A_95_P125627 | FG645115     |
| 27509 | 324 | 54 | 1456 | GTTGGCAATTGAGCGAGCAGTTTATGTAATTAGGTAAACTAACCTCTCAAACTTCA/    | 26716 | A_95_P014751 | TA12350_4097 |
| 27510 | 324 | 55 | 172  | GAAGAGTTATAGTAGCTACTTAGCTAATGAAGAGTTGAGATTGGAGTTGGAAATAG/    | 26718 | A_95_P099218 | BP534843     |
| 27512 | 324 | 57 | 452  | TAAAATAGGTCATCAGTGCCTACCTCTGCATGTTCTTATTCAAGAATCATGTTCTTGG/  | 26722 | A_95_P249477 | TA21871_4097 |
| 27513 | 324 | 58 | 483  | ACGGTGCGAATCTTAATAGCAGCCTGATGAGAGAGGTATGCCAACAAATTCAAGATTA   | 26724 | A_95_P280868 | AM801892     |
| 27514 | 324 | 59 | 911  | TAAGCTAATAGAGAAAAGTGATGGACCTGAGAAGTTCCAGCTTGCTCGTGGACTGG/    | 26726 | A_95_P225362 | DV159609     |
| 27521 | 324 | 66 | 67   | TTCATTTCCAGTGTCAAACCATTACAAAGGGGGCAACAGTATTACTTTTCAGAGTCTT   | 26740 | A_95_P096343 | TA19280_4097 |
| 27524 | 324 | 69 | 535  | CTATGGTACTTGTTGTAGCTGGATTTCATGAATGTGGTTTTCTGGTTAACTTGGGTGT   | 26746 | A_95_P223427 | EB683624     |
| 27529 | 324 | 74 | 746  | AAGGCAGAGACAGTGTTAAACTGTTTTGAGTTTCTGTGGATTTGTCATCTTCTAGAA/   | 26755 | A_95_P159242 | EH617251     |
| 27530 | 324 | 75 | 1434 | GCGTCAAAAGTAGTGAGGTATCTGAATGCTTGATCCATTATGTAACCATATAAG/      | 26757 | A_95_P191192 | AY748246     |
| 27535 | 324 | 80 | 872  | GAACTATTACCATGACATGCATGTCATTCAGGATTTGCTTGTCTCTTTACAAGGTT/    | 26766 | A_95_P245727 | DV162156     |
| 27542 | 325 | 2  | 828  | CCTAGAGACGAACATTTGAGCATATGAGTTGTATACTTTTTGAAGGGTTTGAATAATC   | 26779 | A_95_P267161 | DV158881     |
| 27544 | 325 | 4  | 863  | CACTGTGATTATCAAGCGATGCTTAAGTTGTATGTCAAGATAAGTACTGTGATATTC    | 26783 | A_95_P008551 | EB448266     |
| 27545 | 325 | 5  | 837  | ATGAACCATAGTTTCCATGCGACGTTGAATACTCAGCATGATGCCTATTCTAACACAC   | 26785 | A_95_P118872 | DV161947     |

|       |     |    |      |                                                             |       |                           |
|-------|-----|----|------|-------------------------------------------------------------|-------|---------------------------|
| 27549 | 325 | 9  | 576  | TGCTGTTGAGTACTGGAGTATTTAGAGTATAGGAAATTTGAGGCTGATGATAATAC    | 26793 | A_95_P276399 TC61186      |
| 27551 | 325 | 11 | 918  | TTTGACTTTGAGAATGTATCAGTGAAGGCGGCATGGGAAGGAGAAAAGATTCGTGA    | 26797 | A_95_P212462 TA19842_4097 |
| 27554 | 325 | 14 | 848  | CTGGATGGGCAGCATTTTAATTTGTGTATTAATATGGCTGACATGTATGATCGCTG    | 26803 | A_95_P245957 EB424987     |
| 27555 | 325 | 15 | 435  | TTCCAAGATGAAAACCTGCTGCATAATTTGTGATTTGTAAATCGGATCTGGGATGTT   | 26805 | A_95_P205802 TA18368_4097 |
| 27563 | 325 | 23 | 1389 | TCCTTTGAAGCAAGGGCTTGTATGGACTTTTTGACAGTATGGATATTTAAAGGGCTT   | 26821 | A_95_P188862 TA14663_4097 |
| 27571 | 325 | 31 | 1567 | GTACCATTATGTTATTGAAGACTGAATTTGGGTGGCAATTATGATGTCCTTGTTTGT   | 26837 | A_95_P013916 TA12331_4097 |
| 27573 | 325 | 33 | 860  | TCATCAGATCGCGTAAAGTATCAACTTCTCGTCCCTGCTGTGCGCTCGTAAATGAAT   | 26841 | A_95_P261856 FG158306     |
| 27574 | 325 | 34 | 722  | TGTTGTTGGTGTAACGACGACATAGTAACATATGAGTTAAAGAAGTTGTTGTCGCGAA  | 26843 | A_95_P117142 TA14508_4097 |
| 27581 | 325 | 41 | 950  | AGATAAGGAATTTACCTCGTCCAACAGATATCCAGACTCCGGTTTGCTTTGCGATTT   | 26856 | A_95_P215352 Z93769       |
| 27587 | 325 | 47 | 443  | TATTTAGTGAGTTCATCTTTCTGGTCTTGACAAGGTAGACTCTGAGCTTTTACTTCC   | 26868 | A_95_P200637 FG642292     |
| 27588 | 325 | 48 | 901  | GTTTAAAGATGCCAGTTTCTTCAACAAAACCTTGAAGGTTGATCTCTTCAAGGGATT   | 26870 | A_95_P008186 TA13265_4097 |
| 27590 | 325 | 50 | 598  | GGCATAGAAATAGTTTGCCTTGGTCATTCGAGTTTTAAGCAGTTATTTATAAGATCT   | 26874 | A_95_P124027 DV999471     |
| 27591 | 325 | 51 | 877  | CTTGAATTGTTATAGATGTCAAAATTTGAATTCCTTGGGGATCTCATTAGCATTATC   | 26876 | A_95_P013331 DV157743     |
| 27592 | 325 | 52 | 122  | GTTAGTATCTCAGTGTCTAGCCTGTGTATATTGTAGCTTTGGGATGATACTTTGAGA   | 26878 | A_95_P140327 EB444281     |
| 27593 | 325 | 53 | 2607 | GCTTCTCCTTCTTTATCCGGTGTTTACACTAAACCAATAAATACATGACATGTCTTTCT | 26880 | A_95_P199692 AJ966362     |
| 27598 | 325 | 58 | 945  | GTGCCAAGTAATGGAAGACTTCACCTGAACATTCTTCAAATTGTAAGTAAAATGAA    | 26890 | A_95_P019396 TA18614_4097 |
| 27599 | 325 | 59 | 788  | GAAAAACAAAATCGCTTACTAGCAACTGAGCTCGACGAGAAAGTATAGTGAGTCA     | 26892 | A_95_P226029 EB450197     |
| 27600 | 325 | 60 | 887  | TATTTCTGATGGACATCTAGGTGAATTGTTGAAAGCTTGTGCTTGCCTGTTGTAA     | 26894 | A_95_P205862 EB425041     |
| 27601 | 325 | 61 | 1404 | AATTTTCAACTTCACATGTGTGAGATGCGAGACCATGAGCAGCCACAGATGCACAAT   | 26896 | A_95_P162012 TA13109_4097 |
| 27602 | 325 | 62 | 281  | CCAGAAGTTCTTTTACCGAATCAAATTGTAAGTCCAGCTTTATTGTAATTGGTAGAAGG | 26898 | A_95_P134287 EB436480     |
| 27603 | 325 | 63 | 132  | TTTGGGATTGTATCCTTATAGTGCACCTTTGAATTGAATGGAATATGGTTTTGGACCTC | 26900 | A_95_P095068 BP532999     |
| 27604 | 325 | 64 | 1134 | GAGGATTCGGTGTGTTGTTGTCCTCTCAACCTTCGTTATCTAAATTTACCAAATTTTT  | 26902 | A_95_P016881 TA11996_4097 |
| 27608 | 325 | 68 | 746  | ACATGGTACAAACCGCTACAGCACATTAATAAGCTTCTGTATGCACGTTGGATTGG    | 26910 | A_95_P136392 EB440149     |
| 27610 | 325 | 70 | 744  | AATCCTTGGGACAAAAAAGCCAAGTCTCTCCAGATTTGGGTGATGAAGATTACAAA    | 26914 | A_95_P125707 EB424778     |
| 27613 | 325 | 73 | 731  | TGATGAAAGAAATAGGGCAGTGAGATCGTCAATCAATCCAGATTCTGATTGAGACTG   | 26920 | A_95_P250652 EB677239     |
| 27617 | 325 | 77 | 784  | TCTTTTGGTTCGGGTAATAATTTCTGCCTTGGTCACGGAGAACAGCACAATGAACCTC  | 26927 | A_95_P128332 EB427969     |
| 27619 | 325 | 79 | 554  | ACCTGCGCTTATGGAGGCTGAGAATTGTTCTATTCAATAGTTGTTATGACTGTTATTA  | 26931 | A_95_P053396 BP133165     |
| 27620 | 325 | 80 | 827  | CTGAAGGCTTAAAACCTTTGTTTTGAGGGTAAATTGACAATCTTCTGAGTTTGAGTGT  | 26933 | A_95_P179192 EB678033     |
| 27624 | 325 | 84 | 1850 | CTGATTGTTGAATACACTGTAATAGTGGATGACGTTCTTAGCAATCCCTAAATAACAC  | 26940 | A_95_P208967 AF426837     |
| 27629 | 326 | 4  | 703  | GTTGTTATCCTTTTCCAGTCCATCTATTTTGCGAAGGCTTAAAATCTCTGATGTCCTT  | 26784 | A_95_P020306 EB682996     |
| 27631 | 326 | 6  | 1199 | CTGAGCTAATGAGAGCCTAAGATATGTAAGTCTTCTACGCAAGGATTATTTAGAGTA   | 26788 | A_95_P029471 AF205130     |
| 27633 | 326 | 8  | 731  | TATCCACTCCAGTTTCCAGTTTATGTTAAACGGCAAATGAAGGGTACTATGATTCTT   | 26792 | A_95_P115527 DV157790     |
| 27634 | 326 | 9  | 747  | TTGGCCACAAGCTCGTCAGCCTTTTAGCTCCGAAACCATTGAGTACATAAAATCACTT  | 26794 | A_95_P130892 EB431016     |
| 27635 | 326 | 10 | 443  | TTGGATAATCAGATCCGGCTTGTCTTGAAGTGGCTCTGCATTTGGGTGAGAATATC    | 26796 | A_95_P179837 TA12595_4097 |

|       |     |    |      |                                                             |       |                           |
|-------|-----|----|------|-------------------------------------------------------------|-------|---------------------------|
| 27638 | 326 | 13 | 938  | CGTTTGTACTAAATCATATCAACTTATCATGGTCTGTACACTGTTGTATTCTGTGCACA | 26802 | A_95_P268186 DV999821     |
| 27639 | 326 | 14 | 671  | TTGCCTCAGAAACGGCAGATGCCGTTTTGGATGATTCGATTTTCAGGAGGAATTAT    | 26804 | A_95_P121317 DW001325     |
| 27653 | 326 | 28 | 796  | CCATGAAGGAATTTATTTTTCTGGAAGACTGGATAATTTATGCAGTTCATTCTGCTC   | 26832 | A_95_P186467 EB679484     |
| 27658 | 326 | 33 | 460  | CCTTCAACTTTGCAACATCAGTGAGTACGTAAATTCATGTTTTTCAAGGGTAGTTTT   | 26842 | A_95_P068160 BP137065     |
| 27659 | 326 | 34 | 1629 | TTTGCTGTAGGGATGGTTTTCTATTAGTCCCTTCGACAAGTTTTGTATCACACACGGT  | 26844 | A_95_P022201 TA16637_4097 |
| 27663 | 326 | 38 | 704  | CGCAGACCCGATTTCTCCTTCTATCTCCACTTATTATCCGCATTTTAGACATATTTCTG | 26851 | A_95_P271841 EB679603     |
| 27665 | 326 | 40 | 2456 | GGAGAGCGAAACATGCTGATTGTCATTCTGAAGCTTAAAAAGTTAATTCCTCTGCAA   | 26855 | A_95_P203127 AF435450     |
| 27668 | 326 | 43 | 726  | TGAGAACAAGACAATGACCCTCACAGCACATGAAGGATTAATTGCTTCTTGGCTGT    | 26861 | A_95_P195402 TA16107_4097 |
| 27669 | 326 | 44 | 799  | ATTGTGGATGGTGATAAACCAACAGCGGAGGAGTTTCTGCAAAATCTGGCAGCAGT    | 26863 | A_95_P189877 EB426728     |
| 27670 | 326 | 45 | 143  | CTGACTCAGATGGTAGTGGAACCGAGAGTGGAGAAGAATTTACTGATGATGATTAT    | 26865 | A_95_P118742 DV161799     |
| 27671 | 326 | 46 | 262  | GGACCTGTTATGGTTGTCAAAAGGTTTAGGCAAATGAATAATGTAGGCAAGGAAGA    | 26867 | A_95_P033036 EB425857     |
| 27676 | 326 | 51 | 504  | CCAAGAAGAATTTCTGCTACAGGAACAGGTATAGGTTTAGACAAAATAGGTTTCTCT   | 26877 | A_95_P021271 BP526268     |
| 27677 | 326 | 52 | 760  | GCTTGTGGTGTGCTGTGATGGACATTTATTTGGGTTATCTTTCGATTTAGTGATTCCA  | 26879 | A_95_P019211 TA13400_4097 |
| 27678 | 326 | 53 | 794  | CTTTAGTAGTCTTGTGAATGGAACATCAAGAATTCGGGCATTTCTGTACATGTATCAA  | 26881 | A_95_P136487 EB440252     |
| 27679 | 326 | 54 | 330  | GAGATTCCATCCCTTCGGATCGTTGCAGAAGCTGAAATTGATGATGATGAGTGGGTC   | 26883 | A_95_P197102 EH616530     |
| 27683 | 326 | 58 | 694  | AAGAATGCCTGCTCGTAATGAAATACTTGTCTGCTCTACCGAGTCCTTTGGCT       | 26891 | A_95_P241480 FG636894     |
| 27686 | 326 | 61 | 1404 | CAATTGTTGCCGGAGCTTAAACGCATATTATTTGGTAAAACAGAAGTTTTGACAA     | 26897 | A_95_P179067 TA12420_4097 |
| 27687 | 326 | 62 | 109  | CTACGCAGAGAACATGAAAACAGAGGAAAAAGCCCTCAAATGGGATTGTTTATCA     | 26899 | A_95_P088588 BP530140     |
| 27692 | 326 | 67 | 709  | CAACGCACCTGTTCAAAGAAAAGACATAAGGGAGACCCGCTCTCATTTTACAACTTT   | 26909 | A_95_P213602 TA20083_4097 |
| 27694 | 326 | 69 | 511  | GTATGTCAGAAGTAAAGGCTATCGACTGCCTGGCTGGTTGTCAAGTTCTTCTCATAT   | 26913 | A_95_P274758 AM843365     |
| 27696 | 326 | 71 | 473  | AGTGTTCGGTTGACTGCATCACAGGCAATGTGAATTTATTTCTAACTTTTGGCATA    | 26917 | A_95_P072470 BP525968     |
| 27697 | 326 | 72 | 153  | CGGTCAAATTTGTTTCTGCTATTAGGTATGTAGCTATGACTTTGTATGTTTCTGT     | 26919 | A_95_P128682 EB428430     |
| 27698 | 326 | 73 | 639  | GATTTGGCTAATAAAAAGCTTGAGAACTTCGTCTTTGTGACATTGTGGGTGTCATTT   | 26921 | A_95_P010326 DW004446     |
| 27701 | 326 | 76 | 290  | ATTGTTTTACAACCTCTGTATAATGGCCGAGCTAATTATCAACTGAAGAACTTTGGC   | 26926 | A_95_P133087 EB434177     |
| 27705 | 326 | 80 | 393  | ATTTCTTCACTGTCCGCTGATGGTTGCCATCCCTAACCCAGACTCACATTAGCTAGTT  | 26934 | A_95_P081780 BP528348     |
| 27709 | 326 | 84 | 242  | GATGAAGTAAGAATGGAAATTTTTGGAAGTGTCTTGAAATGCAACATTGAAGATCT    | 26941 | A_95_P143127 EB446468     |
| 27713 | 327 | 3  | 731  | TTGAACCTCTGTAATTCCTATCACCATGAGTTGCTGCAGTAAATAAACATTTTGGAAC  | 26948 | A_95_P003416 TA12319_4097 |
| 27715 | 327 | 5  | 809  | CATTATGGTTTTGATTCGGAGGATGAAGAGGGTTTTGATGTGAATGCGATGAATGGC   | 26952 | A_95_P229935 EB428047     |
| 27716 | 327 | 6  | 1125 | TAATGTTTATATTTGATTCCTGACTTCTGGGAAGGGTTTCTGATTTCAATCTGAGTTC  | 26954 | A_95_P186072 TA14048_4097 |
| 27719 | 327 | 9  | 546  | TTGTGCCGTTTCTGTTGTAGACCTTGACCGAGCAACTTAAATTCATTTCTCTCTT     | 26960 | A_95_P212282 TA19800_4097 |
| 27722 | 327 | 12 | 906  | GATCGTCCTTGAGCTTATGACTTCATATGCTGTACTTAACTGAAGCGAATTATTG     | 26966 | A_95_P264306 DV162499     |
| 27726 | 327 | 16 | 306  | TTACATTTCAACCCACTATGGTGCTCATAGAAATGGAAATTTTCTTGTCTGGAGCT    | 26974 | A_95_P158032 EH616096     |
| 27734 | 327 | 24 | 113  | AGCATTTTTCTGTTTACAAATGAGCGTCGCGCTGCTCTACTTGTGAGACCAAGAAT    | 26990 | A_95_P070685 BP192699     |
| 27738 | 327 | 28 | 710  | CTCTAACTCTTGTACACAGTTAACCCCTTTTCTGTTTTCTCATCTATAGTTAGAAC    | 26998 | A_95_P265561 FG642716     |



|       |     |    |      |                                                               |       |                           |
|-------|-----|----|------|---------------------------------------------------------------|-------|---------------------------|
| 27743 | 327 | 33 | 120  | AGTTGACATGGATAAGGAATTCGCCACACATTGAAAGATTGGTGGATGAGCTTGTTA     | 27008 | A_95_P154692 EG649709     |
| 27746 | 327 | 36 | 811  | TTACCCAGGTTCTCTGACTCACTATAACCAAGAATGGGGTTTCTTGAAACGGTTGAGTT   | 27014 | A_95_P201062 TA17344_4097 |
| 27747 | 327 | 37 | 445  | TAATGTACAAGCAAGTGAGACTAGTCTCGGTTGCTGATTGATTGAGTAAGACTGTTT     | 27016 | A_95_P030711 CV021010     |
| 27748 | 327 | 38 | 147  | CACTCGAAGCTGTATCCTCGGATGTATGTTTGCAGCTTCTGTATTTTATTATTTATCC    | 27018 | A_95_P100313 BP535318     |
| 27749 | 327 | 39 | 760  | ATTATATTATGAGCAAGTGCCTGCTTCTCCATTTTCAACCCTAACCAAACCTTTCATCT   | 27020 | A_95_P163137 EH622111     |
| 27751 | 327 | 41 | 617  | ATTATGAAGACATGGGTATACCTAGGGAAAATTGCAAAACTCGGGGTTAGACAAGGT     | 27024 | A_95_P022816 FG161776     |
| 27760 | 327 | 50 | 637  | TCTCAAAATCCTATGACCAATTCGCCAATGCTGCAAGTAGTGGTCAGAATGCTCATC     | 27042 | A_95_P128162 FG163422     |
| 27768 | 327 | 58 | 615  | GATTTTCCACATGTAAGGTTTAGCTGTGTTAGTTTGGTCTGGTGAAGTCAAATC        | 27058 | A_95_P043976 BP130759     |
| 27769 | 327 | 59 | 464  | ACTGTCCCTTTGGCTTATGCAAAAATGGTAAAAAGCTCAACTTTTGTGGTTGAAACA     | 27059 | A_95_P157787 EH615819     |
| 27770 | 327 | 60 | 737  | CAGGAAAAGAAAGATGAGCTTGTCCCAAGTAAATTTGTGAGTGCATTGCTGAAGCT      | 27061 | A_95_P247212 EB429241     |
| 27772 | 327 | 62 | 695  | GTGATCTAGTTTCTGTGCCATTTGCACGAGAAGATTAGAATGTCTGAACATTGTGTC     | 27065 | A_95_P305648 FG635815     |
| 27776 | 327 | 66 | 556  | CTTGCATGTACAACCTTGATTGGGACCAGCCTTTTGGAGCAAGTCTTGGAAAGTGAAA    | 27073 | A_95_P208892 TA19070_4097 |
| 27777 | 327 | 67 | 246  | TGATTGCATTGACGTTTATGCATTTTATTTGAGACGGATCGTTATACAGATTTTCTGC    | 27075 | A_95_P151727 EB681975     |
| 27778 | 327 | 68 | 864  | GTCAACAAGTTTGTGACGTTTTCTGACATTTTGTCTCCTAATAATCAGATTGGTG       | 27077 | A_95_P224067 EB451766     |
| 27779 | 327 | 69 | 371  | AATTAATTTCCGCGAATTAATCACTGCACAAAATGGGGGTGGCCACCAGGCGATATT     | 27079 | A_95_P294033 FS407656     |
| 27781 | 327 | 71 | 804  | TCAGATCTGCAGATGGCACCCCTACTAGCTTCTTTGAGTATCAATTGAAAGGGTTCTG    | 27083 | A_95_P024211 TA17379_4097 |
| 27783 | 327 | 73 | 452  | CAAGAACCCTGAAAGGGAGTTGATTGAGGCTTGGGATGTGAAACTGTTAGTCAAT       | 27087 | A_95_P007776 EB429702     |
| 27787 | 327 | 77 | 507  | TAGGAAAATTGTTGCGAGAAAATCTGTTCCACCAGTTTTTCTCGGGCTGAGACTTCAAT   | 27095 | A_95_P164097 EH623231     |
| 27791 | 327 | 81 | 673  | GATCTTCATAGGTAGATTGGCGGATACTTTAGCTGCTTTCTGTTTCTTGATTTATAA     | 27103 | A_95_P017876 TA15235_4097 |
| 27792 | 327 | 82 | 726  | CGCATGCTATCTGTTATTTTGCAGCATGATTGGTGTATTATTTCTGGTTTTACTTGCA    | 27105 | A_95_P197477 DW001454     |
| 27795 | 327 | 85 | 889  | AGGTTTCAGTGAAGATGAGGATCACCTTGCTATGATGATGGAGCTTCTAGGAAAGA      | 27110 | A_95_P289938 DV161437     |
| 27803 | 328 | 8  | 745  | GTTCTCAGAGAAATTGCATCTCATGTATCATATTTTGCAGTAATGGTTGTTGTACG      | 26959 | A_95_P027361 TC51269      |
| 27804 | 328 | 9  | 357  | ATGGGCTGAATGAATTTGTTCTAACCTGTGTTGCTTTAACCCAGGTCTGAATTGTTA     | 26961 | A_95_P102632 CV016115     |
| 27805 | 328 | 10 | 914  | GAAAAGTACAGCTATCCAGCTTCTTTGCTGTCTGTGAAGGGCATAGCTTTTGTGTTGA    | 26963 | A_95_P193472 TA15679_4097 |
| 27813 | 328 | 18 | 803  | TGCACTTTTGATACATGTTTTTCTCAGAAATTTGATGCGGTTTAGGAGTTGTTGGTTCTGA | 26979 | A_95_P313158 FG155183     |
| 27814 | 328 | 19 | 661  | GTGTGAAATTGGTTCCAGGCACTGTTAAGAAGGCGAAGACAGCCATGAATTTGTTCA     | 26981 | A_95_P291683 FG639253     |
| 27816 | 328 | 21 | 1063 | CATACCTGGTGCAGTTCTCAAAGGAGCTAAAGGTCTGGCAATTAACGGTTGCAAA       | 26985 | A_95_P200207 TA17160_4097 |
| 27821 | 328 | 26 | 619  | CGTTTATTTTATTGGGAGGCTGTCTTTCTTCTAAAACAAAAAGCCCTCGACCACCA      | 26995 | A_95_P099003 BP534727     |
| 27824 | 328 | 29 | 224  | TTATATTGTAGTTTTCAGTCGTTTCAGACTGTAGCAGCACGAAAGTACTCTAAATTA     | 27001 | A_95_P001216 AJ632923     |
| 27826 | 328 | 31 | 592  | GTTTGTGCAGTGAACCTAAGACGGGATTGTATTGTTGTAGTCCCTTGAACACAAGATA    | 27005 | A_95_P127702 FG167680     |
| 27827 | 328 | 32 | 1928 | GTACAACATTTTGGGGTTTCCCATCAAGAGACCTATTTGGTTATGTTATTCTCGTTTT    | 27007 | A_95_P208847 AJ577853     |
| 27834 | 328 | 39 | 1144 | GGCATTGGTTACGTGCTTTGTTTTAAGACAGTTGTTTTAGCTGTTGGTTTTATCTGA     | 27021 | A_95_P026996 TA12511_4097 |
| 27836 | 328 | 41 | 1654 | TAAGTTTTGCTCGCGACCATTGAAAAGCTTATACTATGATTTAGACCAATTTGTGTTT    | 27025 | A_95_P014906 TA14747_4097 |
| 27837 | 328 | 42 | 543  | ATTCTGCTCTTGGATAGAAGAATACTTTGCCCTGTCTTGTCAAGAATTTATGAGA       | 27027 | A_95_P218092 EH617170     |

|       |     |    |      |                                                             |       |              |              |
|-------|-----|----|------|-------------------------------------------------------------|-------|--------------|--------------|
| 27845 | 328 | 50 | 702  | GTTTGTGCTAGGTCTAGATGCTTTTAAATGAGCAACGATATCAATATGAAAGATGAT(  | 27043 | A_95_P134642 | EB437215     |
| 27847 | 328 | 52 | 653  | CCGAGCACGATGAATAGTAGTTCGCATTTTCAGAATTATAAAAGGCTACTAATGTTG/  | 27047 | A_95_P195477 | TA16125_4097 |
| 27849 | 328 | 54 | 826  | TGAAGCTAACAAATCTAGGGAATTATTACATATACAGGGATTAAGGGCAAAGTCCT    | 27051 | A_95_P224752 | EB440533     |
| 27850 | 328 | 55 | 569  | TCGATTGGCATTCAACGGGAATCTCAAATTTCTAGCAAGAATTTCTTCTCCTCTGG/   | 27053 | A_95_P145002 | EB448549     |
| 27856 | 328 | 61 | 261  | GCTGCTTTCGTTCTTGCATCTTCAATTGACAATAAAGATAGCTGTGTGTTTTGGTCTTC | 27064 | A_95_P093568 | BP532320     |
| 27859 | 328 | 64 | 701  | TCCTCTAGATCATCTCAGCTCCAACCGGCCTCCTCTAGTTGAAATTTTAAATCTTTTT  | 27070 | A_95_P136522 | EB440300     |
| 27861 | 328 | 66 | 573  | TCTGCCTTAGCTCTGGGTATATTGAACTTCTATGGATATTTGATGGTATTTCAAATC/  | 27074 | A_95_P000886 | TA13432_4097 |
| 27865 | 328 | 70 | 761  | CTACGACGTTTCATGCATAAGGCATTGTCTCGAGAGCATTATCTATAGGTACTAATGC  | 27082 | A_95_P259881 | FG642013     |
| 27871 | 328 | 76 | 332  | ACAGCTTTTGCTTCTTGTGTTAGAATGTGCTCAAGTGAGATTTTGCTACTTGGGAAGA  | 27094 | A_95_P133582 | EB435213     |
| 27873 | 328 | 78 | 935  | CAGATAATGAACAAGTGCAGTAACTTGTACAGTAACAAAGCGTGTGCGCATTGG      | 27098 | A_95_P015571 | TA15278_4097 |
| 27874 | 328 | 79 | 1101 | CTCTTGATGCACAACCAATGTTATGTAGCAATTGAGAGTTAATGACGTTGAGCTTTAA  | 27100 | A_95_P218042 | TA21085_4097 |
| 27875 | 328 | 80 | 726  | TACTCTGTAGAGGATTCGATTTTTCCGGGGGCTATATAGTGGAACCTTATGTTGTTG   | 27102 | A_95_P219307 | TA21368_4097 |
| 27879 | 328 | 84 | 150  | AGGCTCTCCTGTTTGAACATCTCGCGCAAAAGTTTTATAAAGTTTTCGAATCTATTTT  | 27109 | A_95_P141367 | EB445112     |
| 27880 | 328 | 85 | 269  | ATTATACTGGTTTGCTACTGCCTGTGATCGGATAATGGGATATGGATACACCGTCTGC  | 27111 | A_95_P166312 | EH663885     |
| 27882 | 329 | 2  | 776  | TGCTATCTCTGTATACTGCAAGTAAATGCTTCTACTAATATCCAGTATTGTTTCATC   | 27114 | A_95_P246902 | EB437920     |
| 27887 | 329 | 7  | 1258 | GTTTTTGGGACCGGTGATTACTGGCATGCTCCTACTATAACTGCAAACATGGCATTTG  | 27124 | A_95_P013856 | TA16537_4097 |
| 27888 | 329 | 8  | 659  | TTTTGAGGTATGCATCAATTTGCTAGAGTTTGAGCATGACAAATACCCAGGACAAT(   | 27126 | A_95_P125047 | DW004864     |
| 27890 | 329 | 10 | 453  | TCGAGAAATTAATTTGAAGGCAAAGTGTGTCGGCAGTGGGCGAGGGAAATTGGTT     | 27129 | A_95_P105897 | CV017662     |
| 27894 | 329 | 14 | 402  | CTAGTTTATTAGTACTTGTGTCTGTTGAAAACAGGGGGAAATTATGGTGTTTAATCC   | 27137 | A_95_P107392 | CV018347     |
| 27895 | 329 | 15 | 337  | TTATGTACCATTCTGCTATTGCATCTCGGTCCGACGTACGATGTTTCAGATCGGAGAC  | 27139 | A_95_P103297 | CV016450     |
| 27896 | 329 | 16 | 755  | CTTTTTGGGGCAGCATGGAACCTTGATGAATTAGATGAAGCTGATATTGAAGATATAA  | 27141 | A_95_P236299 | EB448110     |
| 27899 | 329 | 19 | 406  | TGAGATTGAAGGGGAAATCGATCTTATGAAGTAATAAGCCATATATGCAGTTCCTTT(  | 27147 | A_95_P209367 | TA19174_4097 |
| 27900 | 329 | 20 | 1228 | TTGATGATGTATTATGATTTTCCAAGAAATGCAAACCTACCCTTTTTCACCTTCCCA(  | 27149 | A_95_P190047 | TA14923_4097 |
| 27901 | 329 | 21 | 629  | TATTAGGAGCATGACTGGAGCTTAAATAGGCCAGAGACAGAAAGTGGATTTGTTAG/   | 27151 | A_95_P161667 | EH620334     |
| 27902 | 329 | 22 | 714  | TCACAGTGGATATTTATTACCCCTCATGACATCAGTATGGTGAAGCAGGACGAGAGG   | 27153 | A_95_P269901 | FG642339     |
| 27903 | 329 | 23 | 279  | AGGATATTGGAGTCCAGAACTCAAACCTCTGCTGTGGGCTGCTAAATCAAGAAAGAC   | 27155 | A_95_P070105 | BP192521     |
| 27906 | 329 | 26 | 704  | GCAACCTATGGGATCTAGGTGCTTTCTTGTGTGCTGCTATGTGTAACCTTATCTTATGI | 27161 | A_95_P123442 | DW003300     |
| 27907 | 329 | 27 | 822  | AAAGGGATTGAATCCTGGAAAGCATATTCAGAATATCAAGCGTCTGGAGCTTGCATC   | 27163 | A_95_P126817 | DV999762     |
| 27909 | 329 | 29 | 564  | AATTGTGGAGATTGGTTACCTCAATGGACTTTTCGTGCTGGCTCGTTCAATTGGGCTT  | 27167 | A_95_P148972 | EB678581     |
| 27915 | 329 | 35 | 844  | TGGCAATTGCTGGTGGATTCTTGATGTTATTGTAAGGAAAATGATCTTATGGGGGAA   | 27179 | A_95_P003451 | EB450812     |
| 27918 | 329 | 38 | 700  | CAAAAGAAAATTTACCACAAGAAGCTGAAAAATATGCTCCTGCTCATTTTATTGAC    | 27185 | A_95_P292708 | EB428200     |
| 27922 | 329 | 42 | 582  | GCTGAGAAAATGATTGAAAAGAGAGAGTTGTCTTGTGATTTCTCTCCATCGATTA     | 27192 | A_95_P017511 | DV999315     |
| 27924 | 329 | 44 | 402  | AGTTTTGTGCCATTATAAATCCTCCTCAGTCAGCCATTCTAGCTGTTGGGTCTGCTGA( | 27196 | A_95_P186877 | TA14222_4097 |
| 27942 | 329 | 62 | 643  | AGGCGAGGTTCTTGAATAACGTAATACTGGTTGGTCAACATGGCATTTTATCCCTA    | 27232 | A_95_P288618 | FG638803     |

|       |     |    |      |                                                             |       |                           |
|-------|-----|----|------|-------------------------------------------------------------|-------|---------------------------|
| 27946 | 329 | 66 | 497  | CTGGTAGAGTAGATCATTTGACACGGGTGTTTGTGCACTCTGTACAATATAGATCTT   | 27240 | A_95_P214687 TA20316_4097 |
| 27948 | 329 | 68 | 132  | GATGATGTCGACTAAGCTGTTGGTGTGTTCCCTCTTCTGTTTTTGTATCAGTTAT     | 27244 | A_95_P112292 CV020612     |
| 27950 | 329 | 70 | 472  | GTTGCCTATTTGATGTTGCTCTCAAATTGCCTTCTACATGAAAGCATAAACGGCTAT   | 27248 | A_95_P162237 EH621129     |
| 27956 | 329 | 76 | 566  | AATTGAGCATGTTTACTAGAAGTCTATTAATGAAAAGCTATGTCAGGAAAGCTGCTC   | 27259 | A_95_P139722 EB443604     |
| 27961 | 329 | 81 | 724  | ACTTTGTACAATGGGTGTATCTGTATGTCAGTGAGTTGGAAGGAATTAATGGCTTT    | 27269 | A_95_P119442 DV162658     |
| 27964 | 329 | 84 | 683  | CAATGATTCATCCTTTATTAGAGTACTTGATCCTTGCGTATACTTCATTTTT        | 27275 | A_95_P001641 FG184528     |
| 27974 | 330 | 9  | 728  | CAGAGAGGGAGTACTTGTATTTGAGGATGAAAATGAGGCTGCAAGATACTGTGACT    | 27128 | A_95_P146317 EB450322     |
| 27975 | 330 | 10 | 167  | TGGCACAGTTTGGTCATGTACTGACTGTTGAACTGCTCTTGAACCAAATGATTGT     | 27130 | A_95_P122472 TA18158_4097 |
| 27977 | 330 | 12 | 702  | AGAGTGACAAGCAACACACGCGCATCATATATCAGTTTCGATTTATTGATTAATA     | 27134 | A_95_P303498 FG198624     |
| 27978 | 330 | 13 | 1014 | CCAACCTTCATAAATGGAAGAGGAGGTCCATTTGTTGGCTATAGTTTATATTTTACC   | 27136 | A_95_P008961 AF068724     |
| 27979 | 330 | 14 | 310  | GGCACAGAGATGGATACTTCTAGGAAAAACAAGAAGATATCTGCAACAAATTGGA     | 27138 | A_95_P081650 BP528314     |
| 27982 | 330 | 17 | 752  | CTTCGCTTCAGAGATACACTGCAGCTTGACAGGTGGCAGTTATCTGTTGAATATATC   | 27144 | A_95_P146832 EB450977     |
| 27983 | 330 | 18 | 1740 | ACTCTATCCTTGATTTGGTTCAGTTTGGAGGAAATCTTTAGACGTAAGAACTTTGCC   | 27146 | A_95_P023621 TA12387_4097 |
| 27985 | 330 | 20 | 697  | TAAGTGACAACAAGTTTTTACCTGCTCCGGCATTTCAGTACAGAAAGGATGTTTTCAA  | 27150 | A_95_P016841 TA16086_4097 |
| 27989 | 330 | 24 | 759  | TTGCTAGATGGTCGCTGCATGGCATGTTAGACTTTTGGAGTTGAGCCTAGCAATAGT   | 27158 | A_95_P013156 EB678699     |
| 27992 | 330 | 27 | 225  | CTGTTATTAGAGTGTGATGTTCTGAGTTTCTGATACAATTACATGCTAGCTGCTATG   | 27164 | A_95_P147057 EB451298     |
| 27994 | 330 | 29 | 398  | TCGATGCTATCTGAAGGCATGTATGGTGACTATACCACATCCTCAAGGACTTCAAAG   | 27168 | A_95_P279238 AM816248     |
| 27995 | 330 | 30 | 902  | GATGATTATGGACCTTTGTCAAGGCTAATTTGTGATAGTTTCTTTTATTGTTGAT     | 27170 | A_95_P024436 TA15458_4097 |
| 28004 | 330 | 39 | 661  | CATATCCATTCAGGTTGTACGATCTCGATTGCAGCAACGACCAAGTACAACCTGGAG   | 27188 | A_95_P135477 EB438958     |
| 28007 | 330 | 42 | 562  | GTATTTGAAGTAATCTTCATGGCAATCCTTATCTTCGTCACACTGACATTCCTCCATGG | 27193 | A_95_P223532 TA22271_4097 |
| 28009 | 330 | 44 | 198  | TTGTCGATTGGTTGATATTGGCCTTTGTATCATATATGGGACAGTAATTTATTTCGAG  | 27197 | A_95_P112497 CV020707     |
| 28010 | 330 | 45 | 322  | TGGGTACAGAAAGAAGTTCTATGTACTGCAGTACACCCCTAGTGTGCTTGTAAACATC  | 27199 | A_95_P092023 BP531608     |
| 28012 | 330 | 47 | 735  | GCCAACACAACATTAACCGTAATAAAAACATAGTCCGTTAGCATTGCTGGTTTCTTAAA | 27203 | A_95_P004446 TA12140_4097 |
| 28013 | 330 | 48 | 673  | ATCCAGTGTGTCGATGCATTCCAGACCTATATCTTGTATTGTTTATATCTGCAAGATC  | 27205 | A_95_P216062 TA20623_4097 |
| 28015 | 330 | 50 | 843  | ATTGAGGCTCTGTGTGCCAAGACATACGAGGACACAACCTCATAAACTCCAGGATATT  | 27209 | A_95_P128662 EB428409     |
| 28017 | 330 | 52 | 274  | CTTGTGACACCGGATTTTGGGATGATTATGGGTTGCAATGTATTGGAAATTTTAAAC   | 27213 | A_95_P132492 EB432990     |
| 28019 | 330 | 54 | 485  | TTGTTCTCTGGGTCTCGTCTAGTTGAAGAAGAAGAAGCAAGCAGCCATAGATATCC    | 27217 | A_95_P276198 AM785983     |
| 28020 | 330 | 55 | 931  | TTTACACTACGTCATCTGAGCAGCTTGTATTCTGCACCATGCAACGATGAACCTCATT  | 27219 | A_95_P013801 EB425369     |
| 28023 | 330 | 58 | 337  | AAGAATTTGAGCGCATTCTGGTTGTCATTTCACTCCAGGATTTTCTCAATGGTG      | 27225 | A_95_P070070 BP192513     |
| 28029 | 330 | 64 | 858  | GGGCAGCATGATCTTTGCAAGATATATCCGAATGTGTATGTTATTTCAGTCGACTTCC  | 27237 | A_95_P139142 TA18679_4097 |
| 28031 | 330 | 66 | 1233 | GCTCGGCTGATAAAGATTGCAAGGATGACTAAAGAAGTGTAGTACATGTTTTAAAA    | 27241 | A_95_P212077 TA19752_4097 |
| 28035 | 330 | 70 | 671  | CTCTTTATTTGGATCAGCTGGATTATGTAGGATAGAATTGTAATTTACAGCACAGG    | 27249 | A_95_P283888 FG637420     |
| 28041 | 330 | 76 | 316  | ATGGTGTCAATTTGTAATATAACCATCTTTGTGATGATCCGCGATCATGTTACAGCATT | 27260 | A_95_P140107 FG625819     |
| 28043 | 330 | 78 | 698  | GCCACAATGACTTACTTTCTGGAAATCTGATGCTTAATGAGGATAAAGGAAAGCTG    | 27264 | A_95_P123057 FG169254     |

|       |     |    |      |                                                               |       |              |              |
|-------|-----|----|------|---------------------------------------------------------------|-------|--------------|--------------|
| 28048 | 330 | 83 | 865  | GACTAGTTGAACCTTAGAAAATTCATTTCTTCTTTTTCGTGCCAATCCGGTAGTTTGTTT. | 27274 | A_95_P018831 | EB679147     |
| 28054 | 331 | 4  | 425  | AATAGTTTTGATGGGCACCTTTGTTCCGGAAGTCACCCAGGAGATAGGATTTTTGCCTC   | 27285 | A_95_P130957 | EB431094     |
| 28057 | 331 | 7  | 1461 | GAGTCAAGTGTTCCTACCTTCTGCCATTTTTGCTTATTTTACAGCTATTAGATTGT/     | 27291 | A_95_P016921 | TA12917_4097 |
| 28060 | 331 | 10 | 853  | GTTGACTAGCATAAGTTTATGTAGCCTTCTGCATTTGATCTTTAGGAAAATCTCTTAT    | 27297 | A_95_P181102 | EB447626     |
| 28062 | 331 | 12 | 339  | CTGGTATATCTTACCCGACTTTTATGTCTTTTTGAATCTTTTGAGAGGTTTAATTGTG    | 27301 | A_95_P205147 | TA18218_4097 |
| 28063 | 331 | 13 | 831  | TTATGAATCATTGTCTTTGCTTTATCACTATTTGTACAGGGATTTGTTTGGGGAGG      | 27303 | A_95_P204972 | TA18180_4097 |
| 28064 | 331 | 14 | 625  | GTTTCCATGAGTTACTCCCTTTGAAATTTACTTTTGGTTGAAATATTTGCAAAGCACC    | 27305 | A_95_P039186 | BP129482     |
| 28069 | 331 | 19 | 641  | AAGAATAATTTAGAATGAAGAGTGAGGGTATTGGTTTTGACGGATAACGTGGCCTG`     | 27315 | A_95_P004501 | EH620311     |
| 28070 | 331 | 20 | 449  | CATTAGTCCGTTTGCTTCTTAAAGATGATATTGATCATCTGTTGCATACTCACGCTCTI   | 27317 | A_95_P026746 | TA16770_4097 |
| 28071 | 331 | 21 | 596  | ACGCATGCTTACAGAAATCAAGTTTAAATTCGTGCTACTGTTGTGTTAGGGTGCAATC    | 27319 | A_95_P185492 | TA13925_4097 |
| 28074 | 331 | 24 | 527  | AAGTTCTGGTTGCGGATTTGCAATTTTTGAGGGATCAAGTGACAATTACTCAGGTCA     | 27325 | A_95_P156712 | DV158890     |
| 28083 | 331 | 33 | 868  | TTGTTGTAGGAAAGCCCTCAACCTTCATGATGGACTACTTGGCTAATGAGTTAACAT     | 27342 | A_95_P245692 | DV999727     |
| 28086 | 331 | 36 | 407  | TGACAGAATGGAGTTAAGGGGACAGATGATTCAAATGCATAGAGACAACCTTTATC      | 27348 | A_95_P088443 | BP530065     |
| 28089 | 331 | 39 | 580  | GGGATATAGATACAGAATTGTGTACAACCTATCCAAGTTCTGCTAGCATAAAAATTGAG.  | 27354 | A_95_P046486 | BP131409     |
| 28091 | 331 | 41 | 164  | CGTGTATGCTCAAATGATTGATGATGCAGACGGTATAGAAAAAATAGAGAATCTTCA     | 27358 | A_95_P070075 | BP192515     |
| 28099 | 331 | 49 | 1211 | GTTTTCAGGATCTTCACTTGTCTTAACAGCACATTTGAAGGCTAATATCTCTTCAGTT    | 27373 | A_95_P019041 | TA14074_4097 |
| 28104 | 331 | 54 | 748  | TGGAATTGATTACTTGTGCGTTGCTGCATTTGATGATTTGATACCTTTCCATCTTGTCT   | 27383 | A_95_P295663 | FG194438     |
| 28114 | 331 | 64 | 788  | TATCTGCTAGCATGTGCACTTACATAACAATCTTGTCTTCGAGCCATGATGACGGG      | 27401 | A_95_P298193 | FG138924     |
| 28120 | 331 | 70 | 818  | ATTCTGGGCAGTCAACAGTGTACAGTTTGCATGCATCAGCTACACTCTTTTCTGCA`     | 27413 | A_95_P242852 | FG146943     |
| 28122 | 331 | 72 | 717  | CCCATAATTATGTTTGTTCGTAGCCTTTCTTAGGTAAGTAGGATTTGCTTTTATCCT     | 27417 | A_95_P025036 | TA15399_4097 |
| 28125 | 331 | 75 | 654  | GAGGATTTGGAATCCAGGAAATCTAGGAAGAGGAAGAAATTGAGGTCTAGACGTAC      | 27423 | A_95_P120407 | FG141664     |
| 28128 | 331 | 78 | 666  | AACTGTTTTGGTAACGCTTAAGGCTCGTTCCTCCCCCTGTTCCATCCTAACTTTATTAT   | 27429 | A_95_P089113 | BP530351     |
| 28129 | 331 | 79 | 788  | AGTATTCGGTCTTTTAGGTGATGTTAGAGTTTGAATAGTCTAGTTATGTTTGCCTAG`    | 27431 | A_95_P202412 | EB679032     |
| 28130 | 331 | 80 | 768  | TTCCTGAGCAAGCTGAATTTCTGAACAAGATGATCATCAGCTGATGTTGGTTTATATT    | 27433 | A_95_P231509 | EB426608     |
| 28131 | 331 | 81 | 873  | TGGTCATCCTGCAGGACTTCAAGTGGTATGATTTTCAAAAATGCATAAGCTGTA        | 27435 | A_95_P227689 | EB681843     |
| 28132 | 331 | 82 | 321  | CCCTGCAATTTAAAGTTTTATGAAGGAGTTTGAACACTGGGAGTCGATCTCATTTTCT.   | 27437 | A_95_P026901 | TA18797_4097 |
| 28138 | 332 | 3  | 800  | ATCCAGAGCCTGCAGCTGGGGATGCTATTTTTGTACGTATATTTTACGCGATATTTGGC   | 27284 | A_95_P267526 | FG145967     |
| 28139 | 332 | 4  | 781  | CGAGATAACCGAGCTAAAAGCTGGCACTCATGTCTTTGCAGTTTATGGTGACAATTT     | 27286 | A_95_P245222 | DW000634     |
| 28141 | 332 | 6  | 845  | CAGACATTGTGCTGATATCAATGATTCAGATCTCCAAAGCTTGGGTGGTGAGCTTAA     | 27290 | A_95_P241085 | FG163772     |
| 28142 | 332 | 7  | 472  | TGGAATCATATAACTTTCTATATCATGTTTTTGTACACTAGGATACCTGAGCTTTCCC    | 27292 | A_95_P208487 | TA18979_4097 |
| 28155 | 332 | 20 | 134  | TGATATTTAATCTTTCCCTTGTACAGAGGTTTAGATCAATGCCTGTACTTTGCCTTGG    | 27318 | A_95_P141017 | EB444816     |
| 28157 | 332 | 22 | 790  | TTCTATAAGAATTTTGAAGCTCGTACTGTGCACGTGATACTAGCGCTTATCAAGAG      | 27322 | A_95_P296278 | EB451118     |
| 28163 | 332 | 28 | 809  | ATCCTAAATCATTTGATCCAGAACAAGAACGAGTACTGCAATGGGAGGTGACCACCA     | 27333 | A_95_P157192 | EH615220     |
| 28164 | 332 | 29 | 750  | GCAATCATCTTACTTATTGGAAATATTTATAGTGTGACAGATACTTGGCCAAGTGCT.    | 27335 | A_95_P179977 | TA12628_4097 |

|       |     |    |      |                                                               |       |                           |
|-------|-----|----|------|---------------------------------------------------------------|-------|---------------------------|
| 28170 | 332 | 35 | 651  | AAGAGTTGATTAGCTAAACCGATGGCTGTTTCATTGGATGAGCAGTGATCAACTATTT    | 27347 | A_95_P219497 TA21409_4097 |
| 28171 | 332 | 36 | 386  | CTTAGCAATCCTTTTCCTGAAAAAGATCAAAATTTTGTTCACATATGGCATGGCTGTG,   | 27349 | A_95_P093638 BP532343     |
| 28177 | 332 | 42 | 670  | ATTTGACGACATAGATAATGAGACTCCCACGGGTGAGGGTATACAACCTGAGTTGTT     | 27361 | A_95_P020836 TA21361_4097 |
| 28180 | 332 | 45 | 610  | GGACGACGACACTTTTATGTCTACAGCACCTTGAATTCTGTGTTAAACAATATGTGTGA   | 27367 | A_95_P139452 EB443209     |
| 28183 | 332 | 48 | 655  | GGGATGGTCTGGGGTCAAGAAACCATCAACTGACAATTTGTTTGAACAAAAAAGAA/     | 27372 | A_95_P253164 EH614269     |
| 28184 | 332 | 49 | 408  | TAATCTTTCTTTGTCATCCAAGCCAATAATGTAGTAAGATCACGCCAAATATGCCTT/    | 27374 | A_95_P006706 CV019425     |
| 28189 | 332 | 54 | 415  | GGGGTTAGGGTTTATAGTGTATAGTAGTAAGTGATTGTAATTTTCATGTTTGTGCT      | 27384 | A_95_P110157 CV019607     |
| 28190 | 332 | 55 | 513  | AGCAGTACCAGATTTGACAGTTGTATCTTAATTGGGCTTTTGCCATGTTTTGTAACAA    | 27386 | A_95_P121522 DW001601     |
| 28191 | 332 | 56 | 794  | TAGTGTCTAGTATATGGATCTCTTGATTGTAATGCTGTACCTGGGTCTGCCTACTCTI    | 27388 | A_95_P204912 TA18167_4097 |
| 28193 | 332 | 58 | 462  | GAGGTGAATAATTTCCCTCATATTTGACTTAAGGTGTTTCTCTGCAATATATTTGTCTC   | 27391 | A_95_P029901 BP129902     |
| 28198 | 332 | 63 | 983  | GAGTGGACCATGGAGTACTTTTGGTTCCCTTTATACCTATTTTCATTTGCCTTTTCATTC  | 27400 | A_95_P028001 TA17514_4097 |
| 28200 | 332 | 65 | 432  | AACGAGGCCTAGTGCTGTTAAAGTTTGCAGTTATATTTGCCTGAATTTTGTTCGTTAC    | 27404 | A_95_P212192 TA19780_4097 |
| 28201 | 332 | 66 | 551  | GTTTCAGTATCTCCTTATAATATCAAACCTATATGGAGTGGTTTATGCCCATTTGCTTCTC | 27406 | A_95_P182607 TA13260_4097 |
| 28204 | 332 | 69 | 678  | TGATGCTGCTCACAATAATAGCAGCAAAAAGCAAATCAAGTGGAAAGTCTCGACAGC     | 27412 | A_95_P285478 TA15934_4097 |
| 28205 | 332 | 70 | 594  | GTGTCTTTCAGCTTGACTGCCCTTCTGGTTTTATAATGTGTCCATAAATAATATAAT     | 27414 | A_95_P257851 TA16849_4097 |
| 28207 | 332 | 72 | 847  | TTCAAGTTATCATATCAAGCTTGATATAGAGAGTTTACTTGCGAGCTTAACCTGATAG    | 27418 | A_95_P116747 DV159539     |
| 28210 | 332 | 75 | 598  | AGGCCAAAAGTTTGGGTTGTTTTGCGCCCGTTTTAAGGACTGGGTGTAAGATT         | 27424 | A_95_P247552 DW004850     |
| 28216 | 332 | 81 | 765  | TCCATTAACATCTGTGAAGACTAGTTTTCTGACAATGGGAAGTTGCAATGCTTTAC      | 27436 | A_95_P126197 EB425445     |
| 28217 | 332 | 82 | 160  | CTCAGTCTTACGAGGAGAAAAACCGTGATTTCGAGAAAAATTTTGAAAAAATCTACG     | 27438 | A_95_P155142 DV999238     |
| 28225 | 333 | 5  | 748  | GGATACTTTCAGGGTGTGTAGTTAAATATTATGTTAACAAGAGAGTATAGCTTGCTC     | 27453 | A_95_P151402 EB681601     |
| 28228 | 333 | 8  | 773  | GTAGGGAACCTTGAGAGAAAAGTTAGGTGAGTTGAATATTACTGTGTGTTTACAGATT    | 27459 | A_95_P149272 EB679093     |
| 28229 | 333 | 9  | 924  | ATATGAATATCCAAGCATCTGGTCAGGCAGTTAATGAAGAATACCATTCAAGTGAGC     | 27461 | A_95_P005041 DV159546     |
| 28230 | 333 | 10 | 483  | GTAGGAAAAAGGTTACCTTACTAAGGGCCTTTTCAAGCTGAATGTAATAGTTGTTGA     | 27463 | A_95_P209047 TA19104_4097 |
| 28232 | 333 | 12 | 1346 | CATGCAAGCAAACCTGCCAAATGCTACTTTAAGTTTATTTCTAACCTCTTCTTGTGAA    | 27467 | A_95_P208072 EU375458     |
| 28233 | 333 | 13 | 451  | GCGATGGTTTTTCACTTCTACTAATTAAGTCAATTCATCATTCTTTGCCACTGTAGTCG   | 27469 | A_95_P021631 EB426729     |
| 28236 | 333 | 16 | 531  | TTGTGTCTTTTTGCTGAATGTTAGGGTTAGTGATGTAATCAAGTGACTTGTTTCGAT     | 27475 | A_95_P195847 FG637321     |
| 28248 | 333 | 28 | 604  | ATGCACCTTAGGGCAGAACATTTGCTTTTACGGATATTATTAGCTTGTGGACGAGTTA    | 27499 | A_95_P308243 FG641761     |
| 28251 | 333 | 31 | 441  | GCTTCAGTAGACTTTATCTGATGAAGGCTCTTCACGAGAAGTGGAAATCTATGGA/      | 27505 | A_95_P155877 EG650306     |
| 28254 | 333 | 34 | 487  | TCCGTCACCTTTCATGTGTGCTTTTGTGGTGAGATGATTTTGTATAGTTTGTTTTCTTGAC | 27511 | A_95_P125087 FG138878     |
| 28255 | 333 | 35 | 900  | GTAATCACTTTAGAGCTTACTCTTGTGTTTGTCTACTTTGGTACTTCTCTCTGTACTCG   | 27513 | A_95_P215637 TA20532_4097 |
| 28256 | 333 | 36 | 2275 | GGGCATATCCCCTACACAACGTCCTATAAATTAATTTTGAAGTTTTTGGTCTTTGT      | 27515 | A_95_P007311 AB063576     |
| 28258 | 333 | 38 | 409  | CCTGCACGCTCATGCAGGATTTAATAAAGGTTGAAGTATCTAATGTTTAAAGTGTGGC    | 27519 | A_95_P110207 CV019622     |
| 28263 | 333 | 43 | 754  | CAAAAAGGCAAAGGTTGTTTTTCGACAGATTCATGGAGCTGAGATCTGTTAAACCAG     | 27529 | A_95_P119252 DV162351     |
| 28265 | 333 | 45 | 646  | TCGTGTTAAACTTTTCACTAAATGTCTCTGTAACCTAAGTTCTGCCAGTATATTGGTTG   | 27533 | A_95_P021001 TA14213_4097 |

|       |     |    |      |                                                              |       |                           |
|-------|-----|----|------|--------------------------------------------------------------|-------|---------------------------|
| 28270 | 333 | 50 | 898  | TGTATATTTGTGGCAGCCCTAACAAACACAGTAGTATTTGCAGCAGCCATTACCGTGC   | 27543 | A_95_P267691 DV161322     |
| 28271 | 333 | 51 | 599  | ACCTGTTCAATTCCTTATCACGGTAACAACCTCTTTTATGAATAGCTAATTTTACCAGC  | 27545 | A_95_P200632 TA17248_4097 |
| 28279 | 333 | 59 | 398  | TGTACAGAATTGTGCATGAACGTGAATTGGTTTTCAAATGGAGTGCTGAATTTCTCCT   | 27560 | A_95_P009356 TA15160_4097 |
| 28280 | 333 | 60 | 966  | ATTTGCCTAATAAATGCCTTTGTGGCTCTCCGTTGCCGGCATGTAAATAATCCGGTG.   | 27561 | A_95_P193632 TA15713_4097 |
| 28286 | 333 | 66 | 208  | GACCCCATAGTGGGATTTACTGGATTGTTGTTGTTGTTTACACCCTTTGGTTATAC     | 27573 | A_95_P241774 AJ718624     |
| 28288 | 333 | 68 | 827  | ATTTGGAAATGCAGCACTTTGCTTGCTGATCGAGCTTCTTGTGATGCATGTCATCGT    | 27577 | A_95_P231799 EB677988     |
| 28289 | 333 | 69 | 771  | CTAGATATGTTTGTGTTGAAGGTCTGATATTCGACTGGTACTGTCCAATGATGGAGC    | 27579 | A_95_P145372 EB449085     |
| 28292 | 333 | 72 | 632  | TAGGACTCATTCCGACTATTATATTGATCATCAATAAGAGGGATTTCTCTGAACTCTC   | 27585 | A_95_P016251 TA12889_4097 |
| 28304 | 333 | 84 | 942  | TGTAGGAAAGCATCTTCTGTGATATATTCTAACTTGAAAACCTTAGCTGGAGTGTGC    | 27608 | A_95_P207897 TA18846_4097 |
| 28305 | 333 | 85 | 862  | GTAAGATTCGCTAATTTAATGTTTTATAGAGGTCATACAGTGGCATCTGCCGTTCTAA   | 27610 | A_95_P148777 EB678277     |
| 28313 | 334 | 8  | 173  | CCTCGCAGCTGCTTCTTTCTTCTATAAATAGAGGAGTTTTAGTTTCTTATGTACATA    | 27460 | A_95_P124012 AM789368     |
| 28314 | 334 | 9  | 1663 | TATAGACAGCTATCCTTTTGTGATGCTTTCAACAACTCTATCCTTGATTTGGTTCAGTT  | 27462 | A_95_P008426 Z48977       |
| 28319 | 334 | 14 | 358  | ATGTTGTAGAATCCGACCCAGCTTTGGGGCATAAGCTATTTAACTCAGTTGGAGTG.    | 27472 | A_95_P097603 BP534120     |
| 28320 | 334 | 15 | 876  | GGTTCTCTCCTTATTTGTTCTTATTAGCTGTGATGATGTGATATGCATCTCGTTCATAA  | 27474 | A_95_P014836 TA16067_4097 |
| 28321 | 334 | 16 | 797  | TCGTGACTTTTTGTAATTCACCTTCTAACTGTAACCTTATTCTTAAGTGGAACCTCTCC  | 27476 | A_95_P187632 TA14389_4097 |
| 28322 | 334 | 17 | 470  | TAGCGTCTACCGATTTCCGCATATCCCTTTCTTTTTGAGATTAGGATCTCGTTGTGA    | 27478 | A_95_P225762 AM812458     |
| 28326 | 334 | 21 | 599  | GCATATAAGCTGAAATGATCTTGAAGTGGGAATGGGATATGGTAAATGGGCATGT      | 27486 | A_95_P195002 TA16024_4097 |
| 28330 | 334 | 25 | 864  | CTTTCCTGTATGCTGCTTTATTTCTGCCATTAGAGAGACCATTTATAGAGATAACA/    | 27494 | A_95_P213052 DV159396     |
| 28332 | 334 | 27 | 275  | GCTAGTACTGTCTGATGAAGGCGTGATTTTGTAGTTGAGTTGAAAGTGCTTTAG       | 27498 | A_95_P054876 BP133552     |
| 28334 | 334 | 29 | 862  | GTATTTAGACCAGACAATTCTCAAATGGGGAACTAGTATCACCTCAAAAATTTGTAC/   | 27502 | A_95_P029201 TA21982_4097 |
| 28339 | 334 | 34 | 552  | AGAGTTTGGTGATGTAAAGAAGAAGCTTTTGGTGAATGTTTACAGTTCTGCATCTGT    | 27512 | A_95_P001871 FG190411     |
| 28340 | 334 | 35 | 753  | GAAATGTAAAGCAGTGACCAGAAAAGTCAAGTGATGTAGTTGTTTCTTTTCTTTTGC    | 27514 | A_95_P009831 EB431310     |
| 28344 | 334 | 39 | 700  | GCAACAATCACCTATACACATTCAAGTACTATCTACGTTTATCTTCTCAGGTTTCTTGT  | 27522 | A_95_P131522 EB431843     |
| 28350 | 334 | 45 | 817  | CCTCCAATATCTCAAGGACATTACAACAACATTTCCGAGCTTTGTCTTTCATTCAAGAC  | 27534 | A_95_P120027 TA13706_4097 |
| 28351 | 334 | 46 | 383  | TTGTCCGCTTTGACTTTATAGTGAGCCCTTATATGGTGTTAAAAGAATTTAGATGGTA   | 27536 | A_95_P108737 EH619918     |
| 28352 | 334 | 47 | 380  | AGTCTGAAGTCTGTTGTTGCTTTGCTCCGTTGTTGCTCGTCTCTACTATTGTTGTTCTC  | 27538 | A_95_P089728 FS406815     |
| 28354 | 334 | 49 | 82   | GCCTGTTGATTTTTACCCAAAATTTGATCTTGTTAGAATTAGGTCCTTTTACTTCA     | 27542 | A_95_P106557 CV017950     |
| 28355 | 334 | 50 | 627  | GTAAACACTGGGTACCAGTTAGTTTTTCTTTTATTTAATCTGCTGCAGCTTATCTGT    | 27544 | A_95_P027986 BP134686     |
| 28365 | 334 | 60 | 1047 | CCTCTGTGAATTGACCTGGGTATTATGTTTGTCTGTCTGTTATTTAAGACAATATATTTG | 27562 | A_95_P105997 TA12116_4097 |
| 28370 | 334 | 65 | 580  | CTTCAGAGGCAAGCTCAAATGTGGTGAAATGGAAAGAAAACCTTATAGGAACTTT/     | 27572 | A_95_P261801 BP133500     |
| 28371 | 334 | 66 | 829  | ATGTCTTAGCAAGTCGTAGCTAGTTGTCTAGCTTTATGGTAAATCTTGAGTCTTAGC    | 27574 | A_95_P126137 EB425387     |
| 28373 | 334 | 68 | 525  | GGTTTTCTCGACCTAGTTTATGTATGCATTGTTATGAATAAACTGGCTTCCATACAGC/  | 27578 | A_95_P273356 EB684135     |
| 28377 | 334 | 72 | 495  | TGACGTATTTTGTGGTGATTTCAATGTATGTTGCTCATTTGCTGCTACAATTAGTGT    | 27586 | A_95_P090858 BP531122     |
| 28381 | 334 | 76 | 567  | TACGTGTGATGTGTTTGTAAAGCACCTTTCAGCCGTAAATTTTTCTGTTAATTTTCA    | 27593 | A_95_P196787 TA16416_4097 |

|       |     |    |      |                                                              |       |                           |
|-------|-----|----|------|--------------------------------------------------------------|-------|---------------------------|
| 28382 | 334 | 77 | 418  | CCACTAAGCAAGTTAGCCATTCTATTTTCTCTTGTAAAGGAATGTTTTGAATGGAAGCT  | 27595 | A_95_P142207 EB445745     |
| 28385 | 334 | 80 | 360  | TTTCCCGGGCTACATTGAACTGCATTTTTGTATTTGGTCTGCACTTCCTTGCTGGTTAA  | 27601 | A_95_P299348 FG634412     |
| 28395 | 335 | 5  | 399  | GTCCAAGGTTGAGGTGGAACATGTTAATACATGTGTACACCCAAATATTTTCGAAAT,   | 27620 | A_95_P139667 EB443517     |
| 28402 | 335 | 12 | 898  | CTTCTGACAATGGCATACAAAGTGATCCAAACGAAAAGCTGAATAATCTCATCATTAT   | 27633 | A_95_P009171 TA15054_4097 |
| 28403 | 335 | 13 | 435  | CAGTCACTTGTCTGGGAACATAAACATGGATTCTGGTTGGGAAATTGACTGCTATAI    | 27635 | A_95_P240885 AJ717982     |
| 28409 | 335 | 19 | 791  | GACATATAATGAACACACTACACTGCATACAGAGCTCCTGAAATGTGGATTTGTATCC   | 27647 | A_95_P310108 FG135039     |
| 28413 | 335 | 23 | 219  | GACTACTGATGTATCTTGTCTGATGAAGCAGGTCCAGAGTTCCTGTGGAGAGAATGG    | 27655 | A_95_P068305 BP137098     |
| 28418 | 335 | 28 | 245  | GTTGGCCAACTCTTGTATATCACTTCTTAAATACTGTATTATAGCATGCACCATTTGT   | 27665 | A_95_P214282 TA20229_4097 |
| 28419 | 335 | 29 | 441  | TGGCGAACTCCTCCCGCTCGTTTTGTACTGTCACTGTTTTCGTGATGAAATTTTCAT    | 27667 | A_95_P030441 EH617488     |
| 28422 | 335 | 32 | 601  | TTCCGAAAAACATTCTGGTATACGCCAAGCTATGTTACTCTTTCCAAAAAAGTTATTA   | 27673 | A_95_P000666 EH619838     |
| 28423 | 335 | 33 | 839  | TGAGTTTTCAAAGCTGCTGGACTATGCTGATATGATTAAGAGTATAAATCCTGAGATI   | 27675 | A_95_P147727 EB452255     |
| 28426 | 335 | 36 | 416  | ATGACTGTTGCTTTTGTCTCGTGGACACAGAAGCTTATCTCAAACCTTTTACCCAATTCC | 27681 | A_95_P098343 BP534427     |
| 28428 | 335 | 38 | 109  | GGCTGAAGCGATGGTGAATCCACACATTCTGTTTGAACATCAAATAATATATTCAAC    | 27685 | A_95_P019811 CV015942     |
| 28430 | 335 | 40 | 672  | ATTGATATTCTGTATGTTATGTTTTGGCCACTGGAATGCTTTCAATTGAACTAAGTG    | 27689 | A_95_P018416 FG637372     |
| 28433 | 335 | 43 | 769  | TCTGTTAGCTCAAGGTGGATTGGTGGAAAGTTGAGAAGAAGAACAAGAAAAAGGCTC    | 27695 | A_95_P136077 EB439653     |
| 28442 | 335 | 52 | 876  | TTTAGATGCAAAGAGTAGCTAAGATGTCAGCTCAGCTGATATTAGTCACTGCGTCA     | 27713 | A_95_P290088 FG160077     |
| 28443 | 335 | 53 | 768  | TTGGTCTACCATTACAAAGAACTTCTTTGTGGCCGTTTTGAGCTTGACAAAAAGAC     | 27715 | A_95_P297893 EH614413     |
| 28447 | 335 | 57 | 236  | TAGCAGAAAATGTACCTCAATCAGGGCATCTCTATCACCTCAATTTGGGTCTCGTA     | 27723 | A_95_P156147 EG650439     |
| 28451 | 335 | 61 | 609  | CAAACAATGCTTTGATTTGATTTCTTTTTGGGCACTGCCAATGATGTTTTAAAAGA/    | 27729 | A_95_P206722 EB447449     |
| 28455 | 335 | 65 | 556  | CAAAGATCAGAGAAAAATATCCCGACAGAATGATGCTTACTTCTCTGTTTTTCCCGTC   | 27737 | A_95_P220157 TA21550_4097 |
| 28460 | 335 | 70 | 800  | TTGTTGTTTTGAACTGCGTTTAGAGGTCAATATTGAGGATTTGCTGATTATAAACA     | 27747 | A_95_P247402 DV162530     |
| 28463 | 335 | 73 | 385  | AGCAATAATAAAGGGAACACCAGAATTTACGAGGTTGCGCTAATTCTGGCTACTCCTI   | 27753 | A_95_P085785 BP529377     |
| 28467 | 335 | 77 | 304  | AGATTGATACAAGAATGCTTTTTTGGGGGGTGGGGGTTAAAATCCTCCATTTTGGTG    | 27760 | A_95_P095138 BP533036     |
| 28471 | 335 | 81 | 1102 | CGGTATCTTATCCTACATCAACAAAGAAAAGAAATCACATTGCAACATTTAGGACTTC   | 27768 | A_95_P200657 TA17254_4097 |
| 28474 | 335 | 84 | 516  | CGGCGAAGATGGAGATGGAGATTTTGGTCTACCTAGATTTTGGTAGAGAAAATCGAA    | 27774 | A_95_P081360 BP528233     |
| 28477 | 336 | 2  | 743  | ACTGCCAGTAAAGTGTTAATCACAGGTTGATTTGGGTTGATTTACATTACATTTTG     | 27615 | A_95_P216472 EB440076     |
| 28480 | 336 | 5  | 242  | ACAAAGCATGGATGCTGGTAGTTGACGAATGTTGCTGAGTCGTCACATTGTGAATGC    | 27621 | A_95_P081250 BP528208     |
| 28487 | 336 | 12 | 492  | CAGATCAAAAAGTTTTATCCATGTCAGCACGGATGAGGTTAATGGGGAGACTGATGAC   | 27634 | A_95_P020096 BP128355     |
| 28490 | 336 | 15 | 415  | AGAGCGAGCGTTCCAAAGCTAAATTTGGATGATGTCTTTGAGCAGAAGAATCAAATT    | 27640 | A_95_P079030 EB677602     |
| 28495 | 336 | 20 | 764  | TCATGTGCACTCCAATGTAATGATGATACACCTTTGCAGTGGAACATTTCTTAAT      | 27650 | A_95_P116382 DV159091     |
| 28496 | 336 | 21 | 399  | ACAAAGATGGTGTGGCAAAGTTGGGGCTGAGGATCTTAAGAGTTATCTGAATTGG      | 27652 | A_95_P025151 FS409302     |
| 28497 | 336 | 22 | 184  | TATATAGTTCCAGTTTGCAGGGAGCTTGGAAATTGGGATTGTTCCATATGGCCCTGTT   | 27654 | A_95_P095478 BP533209     |
| 28500 | 336 | 25 | 801  | GCTGATTGATGACGAAGTGGAAGTAAGGGCTTTTCTGTTGAACATACTGCACC        | 27660 | A_95_P151722 EB681973     |
| 28501 | 336 | 26 | 1345 | GGAGGACTTCCGTAGTTTCTGGTGTGTTGAAATTTTCTAAAGCTCTATATTTTTCATGT  | 27662 | A_95_P007851 AY064253     |

|       |     |    |      |                                                             |       |              |              |
|-------|-----|----|------|-------------------------------------------------------------|-------|--------------|--------------|
| 28502 | 336 | 27 | 863  | GGAGGATTCATGTGTTGCAGACATGAAAACGTAACATAAATTGGTCCTTATTACCTAA1 | 27664 | A_95_P219077 | EB426145     |
| 28505 | 336 | 30 | 400  | GCGGCTTTGTTTCGAGTCGGTTTAAATTGTTGTAATCACTAATGTTTTGTTAATTGAAA | 27670 | A_95_P140737 | EB444590     |
| 28514 | 336 | 39 | 885  | ACACCCAGGGGATGCTGTTTCATTAGGATCCTTATAAATACTTATTTTATGGGCGCGTC | 27688 | A_95_P258678 | DV159903     |
| 28516 | 336 | 41 | 300  | GATCAGTGTATGGCTTACAGGATTATCGAATGGAGTAAAGGATTACATCTTTTCCT    | 27692 | A_95_P026461 | CV017453     |
| 28517 | 336 | 42 | 517  | CCTGCGCTAACAGAGCGCATAGTTATTGTTGGTGTAGAGATGATTCAAACCTAATTC   | 27694 | A_95_P029666 | TA18039_4097 |
| 28518 | 336 | 43 | 321  | GACAGCATAATTAGTTATTAGGCTGAAGCTGATCTTAGCATTCTTACATGTTATGTTG  | 27696 | A_95_P155722 | EG650229     |
| 28522 | 336 | 47 | 536  | ATTTATCTGTCTGTCTTGGTTTATGGATACTTGCATGAACCTATTGACGAGAACCTTC  | 27704 | A_95_P193652 | TA15717_4097 |
| 28527 | 336 | 52 | 350  | CAACTATTTGTTGGGGATGTTGTGGTTCTCAAGGACCCTGTAAAGTCAGATGATTATC  | 27714 | A_95_P132497 | EB432993     |
| 28529 | 336 | 54 | 537  | CAAGGGAATGAAAATCATTCTTGGTGTGGATGATATGGACATCTTAAAGGTATTAG    | 27718 | A_95_P058121 | BP134392     |
| 28530 | 336 | 55 | 242  | GGTCATGTTTTAGTACGTCCATAGAGAAAGCATAACGGATATTTGTAGAGAAATGTTA  | 27720 | A_95_P130497 | EB430531     |
| 28531 | 336 | 56 | 693  | GATGACTTCAATTTGTGCTAATTGTTTACTGCCTCTGTTTTGTTAAAGTGAGTTGCTTC | 27722 | A_95_P139382 | EB443128     |
| 28535 | 336 | 60 | 558  | TTTAATTGGCTTGAGCTGAATATCAGGTCCTCCTTGATTTGTGAGGACCTGAACTCGG  | 27728 | A_95_P042871 | FG642918     |
| 28538 | 336 | 63 | 1237 | ATACTTCTTTTTCCGCTTCTCTTGGGAGGCATGTATATTATCTACTAGCTTATGGA    | 27734 | A_95_P177507 | X79675       |
| 28541 | 336 | 66 | 750  | GGGATGTGGGGGAATATTGATTTGTTTCTAATTCCTTGATCTGTTGAAAATTGTTT    | 27740 | A_95_P196072 | AB041515     |
| 28544 | 336 | 69 | 157  | TCACTGTGAAATAACTCTGACCGCTATCCGCGTTTTTAAACACCACTGTGTGATTTAA  | 27746 | A_95_P093783 | BP532408     |
| 28547 | 336 | 72 | 212  | ATACCATTTGCTTCCCCTTGGAGCCATACTGTTTCTTCTACCCTCTTGGAAAAAA     | 27752 | A_95_P224187 | EB643483     |
| 28553 | 336 | 78 | 1579 | CTCGTGCAATCTATGATTTAAGTGAAATTACACTCCGTTTGTAAATTGCAGTGCAATC  | 27763 | A_95_P212412 | Z93769       |
| 28558 | 336 | 83 | 1067 | TGGCAAGAATGGACCAACACCTTAACTTCGTTAGAAAGCGGATTCACATCCATCCTTC  | 27773 | A_95_P194407 | TA15887_4097 |
| 28560 | 336 | 85 | 233  | GATACGGAACCTCTCTGCTCGTCTACTCTGTTTGTTCATATAAGGAATTTAAAGTCCG  | 27777 | A_95_P106962 | CV018146     |
| 28562 | 337 | 2  | 206  | AGATATGCTGATATCTGTCTAAACCTGCCAATACGGTTATATGTCTACCCCGCTGAG   | 27780 | A_95_P114302 | CV021534     |
| 28565 | 337 | 5  | 896  | ATAGAACTTTTTGTCAATTTTTAGTTAAGTTATGTTCTGTATGAGCACGCGAGACGGC  | 27786 | A_95_P268151 | DV999636     |
| 28566 | 337 | 6  | 665  | TAGCAACGACAACAATGTGGATGATACAGGGGAGAGAGTCTCATGTTTCACTGCTGCT  | 27788 | A_95_P297084 | FG197657     |
| 28568 | 337 | 8  | 568  | AACTGCCTCCTCATATTGCTATACCTTTTCAATACTGGTGGATTATTTACTGTTACT/  | 27792 | A_95_P181862 | TA13077_4097 |
| 28569 | 337 | 9  | 289  | ATCTTCCTTACTCATGCAGAGCTGGTCTTCTTGTCTTCTTGTGCTGGAAAAGTTACAGC | 27794 | A_95_P106267 | EB442583     |
| 28570 | 337 | 10 | 813  | GGGGTGGATTTAAGCATTCTTTCGTCAGATGTTTCTCTTAAAGTCATTGTTAATGTTT  | 27796 | A_95_P228109 | DW001771     |
| 28571 | 337 | 11 | 365  | TGCCAATGTTGTCACTGATAGGGTCACTGGGCGCACAAAAGGGTTATGGGTTAGTTAA  | 27798 | A_95_P114028 | CV021408     |
| 28573 | 337 | 13 | 632  | TTGTTATAACAATCTCGAGGGGAGAACTCCTCTTCTCTTAAACGGGGGGAATG/      | 27802 | A_95_P224842 | FG634181     |
| 28578 | 337 | 18 | 782  | TCCATGAGCTAAGTACCAATGAGAATCAGTTCCACTCTTGTGTCTTTCATCCTAGCTA  | 27812 | A_95_P135442 | EB438897     |
| 28580 | 337 | 20 | 898  | TTACTTCTGAGGAAATGAAATGCAGTGACATGTGAACCTTGTGTTGATTACTTTCTTGC | 27816 | A_95_P291823 | EB424975     |
| 28585 | 337 | 25 | 751  | CGATCAATTTGTCATAACTTTCTGTCCAGATCAATGGGGCACAGACCATTGCTGCT    | 27826 | A_95_P146452 | FG157506     |
| 28586 | 337 | 26 | 154  | AATCAAGTGATGTTGCCGAAAGATCAGTCAGCAATGCTGTCAGAAAAGGACCTGGAA   | 27828 | A_95_P216872 | AM789132     |
| 28589 | 337 | 29 | 222  | TTCAATCCTGCGCTGAGTTTATGATTGAAAAGAGATTGCTAATGGCTCCTGGAGCGGT  | 27834 | A_95_P147872 | EB643479     |
| 28592 | 337 | 32 | 524  | CTCTCTATATCTTGTGTCAAAGTTGTGTGGAATTGAGAATCAAGTTAATCCTAGTAT   | 27840 | A_95_P009766 | FG625013     |
| 28594 | 337 | 34 | 1116 | GGCACCTATTAGGGATGGTTGTAAAGGGAATCTAAATTGCTTTGTATATATTGCAGA   | 27844 | A_95_P012411 | TA14462_4097 |



|       |     |    |      |                                                              |       |                           |
|-------|-----|----|------|--------------------------------------------------------------|-------|---------------------------|
| 28597 | 337 | 37 | 441  | GGGTTTTGAAACTTAAAATAAAGAAGTTATCGTCTTAGCTGGATCACCTTGATATTG/   | 27850 | A_95_P136917 EB440622     |
| 28598 | 337 | 38 | 537  | TTAAGTTACATCTTTACTGGCAGATCTCAATAACTGGCACCTATTTGCCATCTTTACA   | 27852 | A_95_P190707 EH620138     |
| 28599 | 337 | 39 | 188  | GCCAAGTGGCAAGCATTGTATCTAGCAATTGGTTTATAATGATGTTCCATGTAAATTA   | 27854 | A_95_P078450 BP527516     |
| 28600 | 337 | 40 | 809  | ATCCTTCATGGATGGAGAAGATACAGCGAACAAATGAAGAGCATTTTCCGCTCTGTGA   | 27856 | A_95_P118207 DV161225     |
| 28606 | 337 | 46 | 968  | TGTGGATGATCTTTTGTGACCTTTGAACTTATAATGGATTAATGCCTGGCGTTATGTG   | 27868 | A_95_P014701 EU880279     |
| 28613 | 337 | 53 | 621  | GACCAGTACACGTACTIONCACACTGTTTTGCCCTATCTATTTATTTGCTTCATGTTATC | 27882 | A_95_P124767 DW004572     |
| 28622 | 337 | 62 | 299  | GATTACGTCGCCAAGGTGGATGATCTGGCAGAGGCTTCAAAGTCTATTACAACATTG    | 27900 | A_95_P213772 TA20120_4097 |
| 28623 | 337 | 63 | 445  | ACGAAATTTTTGTTACCTTCTGGAGAAGAGGTGAAAAAGACTTGGCAAACAATGCT     | 27902 | A_95_P194822 TA15982_4097 |
| 28624 | 337 | 64 | 740  | GCAGATAAGGAAGAGGCAGATAAGCTAGTGGTGTATTCTAGTCCCTGGTTGTGTT      | 27904 | A_95_P016156 TA15241_4097 |
| 28628 | 337 | 68 | 504  | CCCCTGGTCAGTTTCATCCTGGTAGCTGTAGTTGTAACCTAATTTGTTATATATGTG    | 27912 | A_95_P295643 FG635590     |
| 28630 | 337 | 70 | 839  | AGAGCCTGCAGCAGATAAAGAGCTACAAGCATCACCAAAGATGCAAGCTCATTGC/     | 27916 | A_95_P201837 TA17507_4097 |
| 28633 | 337 | 73 | 641  | ACTCTCAACTTACCTGCATTTATGCAAGTTATTGAGTGTACCCGCGATGAGATCCGAG   | 27922 | A_95_P302198 FG198195     |
| 28634 | 337 | 74 | 844  | GGAGTTGGTGAGAACTACAAGAACTCTGCACTTGTGATGGTACAACATTTGGGA/      | 27924 | A_95_P194027 EB425283     |
| 28638 | 337 | 78 | 191  | GACCTATCCTCAGCAGGCTGGTACTATTCGTAAGAATGGTCATATCGTCATCTAAAAC   | 27932 | A_95_P157982 TA12614_4097 |
| 28641 | 337 | 81 | 569  | GTACTTTATCAGTGATGGCAGAGATTGATGTTGTAATAACTAAGTAAAACGAGTTC     | 27938 | A_95_P124377 DW004216     |
| 28642 | 337 | 82 | 863  | TTAGCTCATAGTTTCCCCGGTCAAGTTACATGAACAATATCTTTTTCTTTTCCCCTTC   | 27940 | A_95_P253754 EB440118     |
| 28645 | 337 | 85 | 123  | CTGACAAGGTAATGCTTGAGATTTTTGTGCTCCAGGACTTTTTAAAGCTAATTGTTAA   | 27946 | A_95_P004296 EH616876     |
| 28646 | 338 | 1  | 810  | CCGTACCCATGATGGTAGAGAGTTCCATGCGTGATGTAAGAACAGAGCAGCATTGA/    | 27779 | A_95_P283713 FG142649     |
| 28648 | 338 | 3  | 390  | CTACATAGAGAAGCGTTGTAGCTATTTGATGACATCAGTTATTAATAACCAATTGACT   | 27783 | A_95_P003581 FG642300     |
| 28652 | 338 | 7  | 1013 | AATGTACACCTTCTTGACTTCAATAATAATGTTGGTAATAGCTTGGAAAGTGTCAAC    | 27791 | A_95_P007741 TA12401_4097 |
| 28654 | 338 | 9  | 1062 | TGCCCTTCGAAATCCGAATTGAAGGGTTGAATGCATTAATAATTTGACTGCTAAA/     | 27795 | A_95_P237134 EF051141     |
| 28656 | 338 | 11 | 345  | AACCTTGTTTTCTTTGAATTGTTGAGGGATCATCAATACGGCATTCTTTCTACTGT/    | 27799 | A_95_P094811 BP532881     |
| 28657 | 338 | 12 | 263  | TCTTCTAGAGTCAAACCAACATTCCTGGGCTGCCTAAACTCCACAATTTGCAATT/     | 27801 | A_95_P120712 EB425509     |
| 28658 | 338 | 13 | 657  | TTGTAGAACCGTCAAACCTGACTTCCCTTGTTAATTGACTTCTTAGCTATTGTTGG     | 27803 | A_95_P189422 TA14786_4097 |
| 28662 | 338 | 17 | 637  | CAGACGTTTACCTTATTGTTTCGATTGGCTTTTGTAGATCCATGATTTTGTACTTCGTAT | 27811 | A_95_P268431 DW001404     |
| 28668 | 338 | 23 | 304  | ATTTCCGCAAACGTAAACGTTCACTGCTTACTCTTGGATTATTTACTACGTTTTAGACT/ | 27823 | A_95_P113797 CV021321     |
| 28670 | 338 | 25 | 82   | GCTTTGCAACTTGATCATTGGAATTGCAGGCTAAAACCTGCCATTTGTATAGTTTCAA   | 27827 | A_95_P094233 BP532613     |
| 28674 | 338 | 29 | 597  | ATGCTTCTGTATCAGCTCACAGCTTATGAAAACAGTTCTTAATCTGAGTTTTCGGGTAA  | 27835 | A_95_P307273 FG638065     |
| 28676 | 338 | 31 | 670  | ACACAGTGTTCAACAAGCAACATCCCTGGTAATCTGATGGGTGGAGATAAAAGGGATC   | 27839 | A_95_P304043 FG187103     |
| 28678 | 338 | 33 | 545  | CTGAAATCCCGAAATCCATATCTTCTATACTGTTGAGATTGTTTGTGTTTCTTTCTTG/  | 27843 | A_95_P203232 FG144747     |
| 28680 | 338 | 35 | 886  | GTGGTGATCCGGGCAATCCCATCAAGTCTAAGTGAAGTCTTTTTAACACAGATTT      | 27847 | A_95_P258766 DV999402     |
| 28684 | 338 | 39 | 571  | AGAGAACTTTGCAAGGAGAAAACTAACAAAGCTCCAATTGCACGGTCGCAGTGGT/     | 27855 | A_95_P181223 EB447549     |
| 28686 | 338 | 41 | 857  | TCCTGTGTTGTACGCTTTTGGAAACATCTTGGCTAATTAATAACAGTAGTATCTTTCTT  | 27859 | A_95_P015006 EB426212     |
| 28687 | 338 | 42 | 432  | GAGCAATGTTATGGATGCATTTGTTGGCAGACAATTTACTAGACGCAAGAATTAATA    | 27861 | A_95_P072670 BP526023     |

|       |     |    |      |                                                              |       |                           |
|-------|-----|----|------|--------------------------------------------------------------|-------|---------------------------|
| 28693 | 338 | 48 | 653  | ACTCCACAGGCTGAGTAGATTGACCATCTCTTTGCAATCAAACCTAAAATTATTGCTT(  | 27873 | A_95_P000701 EH617531     |
| 28698 | 338 | 53 | 420  | GCTCGTGCACTTGTGACATCAGGTTTTTGGAAAATTCTAAGAGATATTTATGGTTTTT(  | 27883 | A_95_P220597 FG638076     |
| 28701 | 338 | 56 | 351  | AGTGGAGCCCCATTAACCTGTTGACTAAGAATATTCATAATGGATGAGTTGTCTCTTC   | 27889 | A_95_P193027 TA15583_4097 |
| 28702 | 338 | 57 | 536  | GATTTCTCATGGATTAACCTCTCTTTAATCATATTACATAGCACGCTGCGCTTGTTGTT( | 27891 | A_95_P020996 DW004723     |
| 28703 | 338 | 58 | 623  | TGTATCAATGTTTGCTCTCTCAAAGACTAGCTCGAAAACCATTAGTAAATTGGCACAC   | 27893 | A_95_P236384 FG195872     |
| 28704 | 338 | 59 | 173  | AGTCAACCATGATACTTGGGGCCGTCTTGTTTTCACTTCATGGAAGTCTGAATCAGAC   | 27895 | A_95_P110092 CV019577     |
| 28707 | 338 | 62 | 879  | TGTTTACATTTTACCTTCTAACAAGGAAAAGCAATAGCAGATTTTGTAGTCTCGGC     | 27901 | A_95_P220797 TA21686_4097 |
| 28711 | 338 | 66 | 1756 | CCATCACCATGTAACCACTTTCTACATTGTAAGAAAGATTCTGTGTTTTCCAGCGTTT   | 27909 | A_95_P020281 TA13986_4097 |
| 28714 | 338 | 69 | 680  | CAGCTGCCTCATTTGGGCAGAATAAAAGCAGCCAAAGTTTTGGTAGGGGTCTTCTCT    | 27915 | A_95_P121422 DW001485     |
| 28715 | 338 | 70 | 944  | CTTGCAAATAAAAGCGTACTTCACATTTGAATTTTCCAAAAGGAAAACCCTGATCATGA  | 27917 | A_95_P007786 EB678678     |
| 28716 | 338 | 71 | 238  | TCAATTTGGACCATAAGGTTTCAGCTCAGACGCAGCTATCTAGCAACTACTCATCAA    | 27919 | A_95_P069010 BP137271     |
| 28722 | 338 | 77 | 492  | TTATCACAGTTCAAGTATGAGCTGCTCTTCATCTACTCACTTCTAGCATGTGGTTAATC  | 27931 | A_95_P112557 FG638231     |
| 28725 | 338 | 80 | 289  | GTTACATTCACGTGTGTTGGGCAGCAGCCTTCTAGTGATGAACAAGATGTGGCTTC/    | 27937 | A_95_P134927 EB437840     |
| 28726 | 338 | 81 | 867  | CGGCATACTCAAGTGATCTTCTTAAGCATTCTAAACAGTTATTTACTTTTGCCGACAA/  | 27939 | A_95_P245857 DW000957     |
| 28728 | 338 | 83 | 900  | TTTTGTCCTAGCCAGACATCTTGTAAACGGTATCCCTCCTCCCTGACAGATCATAAGG1  | 27943 | A_95_P178407 TA12240_4097 |
| 28730 | 338 | 85 | 829  | GAGGTTGCTGCTGTATCGTCAGTGCCCAAGTGTTAAAAAATTATAGAACCTTGAA(     | 27947 | A_95_P232004 EB426155     |
| 28732 | 339 | 2  | 73   | AATGCTTAATGAAAGAAAGCCCTTTCATCCTAATCTCATCTACTGAAAAGGGGGCCG(   | 27950 | A_95_P044606 BP130926     |
| 28733 | 339 | 3  | 785  | ACCCCGTTCTCACAAGTTAGTGCCAGTAGGAAATTCCTTAAATTTTTTGCTGGTTAA/   | 27952 | A_95_P213282 EB681275     |
| 28736 | 339 | 6  | 798  | CGACGTCACAACCTCGTGAACATTCTGATGTCATTTACAATATCAAGCAAATTGCATA   | 27958 | A_95_P152662 EB428087     |
| 28738 | 339 | 8  | 819  | ACAATGTGGTTCCTCTCTCTTACGATCTTTTGGAGTACTGGTAGTCCTTCAAGTTTT    | 27962 | A_95_P217312 EB680073     |
| 28739 | 339 | 9  | 750  | CTGGGTTGTTTGTGTTGTTGTTGTTGTTATATTGTGGGGGGTATAAAAGCTCAAAAT    | 27963 | A_95_P029706 DV157797     |
| 28748 | 339 | 18 | 761  | CCATTTGAAAATTCATCAAACAAATCCTAAAGTTCCCAAACCGAGCCATATTATGAGT   | 27981 | A_95_P216877 EB440248     |
| 28750 | 339 | 20 | 1093 | GGAACACTGTGTTATCTTTGAGGAATGTTGGGCTTTTTTCGTTTGAATTATCATGAA    | 27985 | A_95_P000396 M14419       |
| 28755 | 339 | 25 | 893  | TGGCTTTCCAGCAATTTCTAGGTTGTTAAAGAATAAGGTGGTCTATTTGAACTGATGA   | 27995 | A_95_P179002 TA12402_4097 |
| 28758 | 339 | 28 | 849  | GCCCCATTCTATATCCAGAACTGAATGGGATTTTCAGATTACCATTAGTAAAAAGTA    | 28001 | A_95_P206847 EB427446     |
| 28759 | 339 | 29 | 366  | TGGCGTTTTGCTTTGTATGCGCTATAGATGCTATTGAAATTTTTGGTTAGTTGTGATC(  | 28003 | A_95_P003941 EB445445     |
| 28760 | 339 | 30 | 260  | TGCTTTTGGCTAGGAGATGTATTTGTTATCTAAGAATAAAAGCTGATAGCTTCTCTC(   | 28005 | A_95_P029791 BP530498     |
| 28761 | 339 | 31 | 793  | TCTTGCTTCAAACAGGTGATTGGTTTTGTTGGTATGCGGTGATGAACATGCAGCCTTC   | 28007 | A_95_P137097 EB440831     |
| 28765 | 339 | 35 | 476  | TGATTCATATCTTGGCAGCTGCGGATGTTTTGGTTCCTGCTCTCTTCTGGACTCTTG    | 28015 | A_95_P274828 AM790347     |
| 28772 | 339 | 42 | 295  | CTTGTGATTGGGTCTGATGCGCCTGTATATAGTTGTGTTATGCTATGTTTCTCTTTGC   | 28029 | A_95_P131057 EB431202     |
| 28773 | 339 | 43 | 872  | TTGAGTAAAGACCTCAGATCTCCCTCGGCAGTGTACACATAGGTTTCGTATGATGATTI  | 28031 | A_95_P216702 TA20762_4097 |
| 28774 | 339 | 44 | 607  | CAATGTGATAGAATGTCACTATTACGCTTGCAGCAACACAGAGATACCTGGGTCCTA/   | 28033 | A_95_P055481 BP133713     |
| 28777 | 339 | 47 | 473  | CCAATGCATTTTGCAAATTCACGCTTTCCAGTCTCTTCAGGCTCAATTGGTGTAGCAG(  | 28039 | A_95_P062770 BP135600     |
| 28780 | 339 | 50 | 286  | CTATGTAAGCGTTTTGATTTATTTTTCATCTTAGTACTCGCCTGAAGAGATTCCAGGC(  | 28045 | A_95_P110907 CV019958     |

|       |     |    |      |                                                              |       |                           |
|-------|-----|----|------|--------------------------------------------------------------|-------|---------------------------|
| 28785 | 339 | 55 | 345  | ACAAGGCATTACCATTTATCCTGCCTGTGCTGGTGACTTGCAATCTTCAATCAACTTTC  | 28054 | A_95_P105532 FS381087     |
| 28789 | 339 | 59 | 717  | AATTCGGATCCGGAACCATGTATGATTTGATATATGCAAGCGCTGTGTTTCTTCATAT   | 28060 | A_95_P216962 FG136929     |
| 28791 | 339 | 61 | 416  | TTGATGATGACGGTGATGGTAGTGTTAACTTTGAGGAGTTCACGAAGATGATGTCTA    | 28064 | A_95_P196757 FG631576     |
| 28792 | 339 | 62 | 114  | AATAACTTGGGCAAGTTTGGTTATTGGCAGATTTGATGCTGGAGTCGAGCCAGCCCA    | 28066 | A_95_P089908 BP530719     |
| 28794 | 339 | 64 | 767  | TCTGTCTGATGTAAGTATGTCGCAATGAAAGTTGAATCGAAAGATCTGAAGGAATT     | 28070 | A_95_P148377 EB677668     |
| 28795 | 339 | 65 | 1259 | TCTCGTTTCGGATGTTGTTTCAGATTGATGTACATATGAATGAAGCATACCCAGTTGTT  | 28072 | A_95_P026131 TA17129_4097 |
| 28797 | 339 | 67 | 1061 | GTGCGTGTGGGAACAAGAGTGTATGTTGTAACAGTAAATGTTGTGCTTATAATGA      | 28076 | A_95_P210407 TA19390_4097 |
| 28801 | 339 | 71 | 1250 | TGTACTTCAAAAACCTTTTTGAAGTAGTTTTATGGAGTTTTACACCAATTCGGCTTC    | 28084 | A_95_P007546 TA13068_4097 |
| 28802 | 339 | 72 | 168  | AAGGGAAAGCCTGACTGAAGCAGTAAATGCAAGTCATCAACCTTCTTGGCATGCAAC    | 28086 | A_95_P096483 BP533642     |
| 28804 | 339 | 74 | 722  | GCTGATAATTATGAGCAAGTGTCTTCTCACATGAAGCCAAATAGCATACTTGGGCTTT   | 28090 | A_95_P186643 FG160658     |
| 28805 | 339 | 75 | 556  | CTTAGACCATCATCAAGCGAGAAGCTTGTGCGACAACCTCGGTGTCAGTAGTTTGGAA   | 28092 | A_95_P059081 BP134645     |
| 28806 | 339 | 76 | 776  | CGAAGAGATCAAGAACAAACAAAGGGTCATTTCCACCTCCTATTTCTTGCATAGGGA    | 28094 | A_95_P268081 DV999498     |
| 28808 | 339 | 78 | 1367 | ATTTAATACTTCCGCCATTGTTACTCACCTCGCTTATTCTTATCCAAGCTGATGAACCA  | 28098 | A_95_P122017 Y10472       |
| 28813 | 339 | 83 | 196  | GCGGTGTTATGGGAACCGGGAACGTAGTTTAAATCAAAAGTGTACTTCAAGGAAG      | 28108 | A_95_P154797 EG649763     |
| 28820 | 340 | 5  | 681  | AATTTTACGTCTACTGGATCTGTCCCTTCGTAGGGGCAATAATGGCTGCATGGACTTT   | 27957 | A_95_P126547 EB451173     |
| 28821 | 340 | 6  | 573  | AAAGACCTCTTTTGTGGAAGGTTTCTGATTAATTTTGCCTGTTTGGAGTTAAGGCTTT   | 27959 | A_95_P018971 EB679098     |
| 28824 | 340 | 9  | 736  | CGCTTTCAGGTTAAACCCGCTTCTTAGTAGCCAGATGCATTTAGGATTCTGTACTA     | 27964 | A_95_P284178 FG170078     |
| 28825 | 340 | 10 | 739  | TCTAGGTATCACGTTGAGCAGATGCTGATATTGTTTATATAAAAGTTCTTCGCAACAA   | 27966 | A_95_P160757 EH619435     |
| 28826 | 340 | 11 | 894  | ACAGAATTGACCTTTTGTAAAGGGCTTCGGAGTTATGGACTGCTTTTCTTTCCCTTTT   | 27968 | A_95_P010831 TA13869_4097 |
| 28828 | 340 | 13 | 270  | AGTAACTGAGCTCCATTCATATCCTTGATTTTTATTACATTGGCCATTTACAAGTGT    | 27972 | A_95_P110382 CV019710     |
| 28831 | 340 | 16 | 500  | AATTCAGCTCTAATTTTGGAAATGTGTGATGTTATCGAAAATGCCTTCATTTTCGAC    | 27978 | A_95_P052121 BP132837     |
| 28833 | 340 | 18 | 702  | AACTGAATGGCTGCAATGTAGTTGGGCGGCAATCTGCAATGAGTATCCAAGATTTCA    | 27982 | A_95_P015616 TA12798_4097 |
| 28834 | 340 | 19 | 141  | TTTTCGTGGAGAACGATGGTTGAGATACCAATTTTAGGTTGTTTGGGATTGGGGT      | 27984 | A_95_P155217 EG649955     |
| 28836 | 340 | 21 | 91   | CTGCTTCTTCTTGGTGGTACCATGAGAATGACAGTATCAATTTGTGTCATACTCCTT    | 27988 | A_95_P028171 EH664090     |
| 28841 | 340 | 26 | 949  | GTGCGTGGAAAGGTGTTTGAAGTATTTGACTCTTCAATGTAACGGATTATATACTATT   | 27998 | A_95_P009801 TA14092_4097 |
| 28845 | 340 | 30 | 433  | TTTTGGGTGTTTGGGTCAGTTGATAAAGCGGAAGGGTAATCTTTCACGAATTGTTCA    | 28006 | A_95_P097608 BP534121     |
| 28847 | 340 | 32 | 712  | CCTTGAGATAGCTTCTGTTTCACTGTACATTCTGATTCGGCTGTTACTATTTAATATTC  | 28010 | A_95_P116397 DV159102     |
| 28848 | 340 | 33 | 631  | GCCCTATTAGGAACCTCAACAAAGATACTGATGTTGAGGAACATTATGAGTGTGCT     | 28012 | A_95_P062340 BP135490     |
| 28849 | 340 | 34 | 702  | AGAGTAACTCTTGACCTTGTTATTGTGTATGAGGAAAGCTTTTAGAGGCAAATTGTT    | 28014 | A_95_P125382 DW005168     |
| 28851 | 340 | 36 | 423  | TTGATCCTTACTGCTGTTCTTCACTTTATCAAACAGATCCATCTGGAACATTCTCA     | 28018 | A_95_P277519 DV158532     |
| 28852 | 340 | 37 | 331  | CTCATCCCTTATGATTTTAAAGTAGTTGTTCTTACGGGATCTGGAAGTTTATTGGGCT   | 28020 | A_95_P105587 CV017531     |
| 28858 | 340 | 43 | 730  | GTCTAGACTAGTGAAGTTTGGAGCTTTGGCATGAAATTTGAAATACTGAATATCATG    | 28032 | A_95_P117997 DV161018     |
| 28860 | 340 | 45 | 104  | TCGTCCCCTATCATGTTTGTCTTTTACACAAAATTAAGCAAACCTGGAACATTTTGTCTT | 28036 | A_95_P118242 DV161252     |
| 28861 | 340 | 46 | 1130 | CAGATTCATATTCTGCAAGCTTTTGGAGCTGGAAACATCAGATTTGTCCATTATTTAA   | 28038 | A_95_P031236 TC66585      |

|       |     |    |      |                                                               |       |                           |
|-------|-----|----|------|---------------------------------------------------------------|-------|---------------------------|
| 28862 | 340 | 47 | 810  | GGAGTTCCTTTTTGCTAACAGGCAATTGGCCTTTCCTCTTTTTAGTTATACTATATTGA`  | 28040 | A_95_P202917 TA17743_4097 |
| 28864 | 340 | 49 | 774  | ATAGATGAGGACCTCGTGGCATTGCTTGGAAAGTATCCCTATTCTGTAACATATG       | 28044 | A_95_P217067 EB450156     |
| 28865 | 340 | 50 | 451  | GCAAAGAATAAGAACCTTTCTACGCTTTGCTTTGGGTCTTTGCAGATATTATCACATG`   | 28046 | A_95_P003996 FG644065     |
| 28867 | 340 | 52 | 388  | TGATTTGCCTGGTCAGAAGAGAGATCCTCCTGAGGAAAGAGACCCATTAAGGATTTT     | 28050 | A_95_P074245 BP526415     |
| 28870 | 340 | 55 | 609  | CTTTTGACTCACTTTGCTCTCATTTGGTAACTCTTAGCTTGTCTCTAAGAGAAACAAAA   | 28055 | A_95_P026646 TA12843_4097 |
| 28871 | 340 | 56 | 811  | GTTGGGAACCTTGCTCATTGTACATGTTTTCCGAGCTGGTTCTGTACACAACACTACATAC | 28057 | A_95_P251487 EB451542     |
| 28885 | 340 | 70 | 773  | GCTCAACTGATTTGATGATGGATTGCTTAGAGATTTGGACAAGTAAATGTACTCATTG    | 28083 | A_95_P195327 EB447714     |
| 28886 | 340 | 71 | 122  | CTCTCCGTGCCATACAGGGTTTACTATACCATGTACAATAAAATGATCTTATGAATAC    | 28085 | A_95_P162657 EH621661     |
| 28887 | 340 | 72 | 784  | GTCTGTATCTGTGTGCATTGTATGCTATGTTTTCTGGAATAACAGTTATGAATAAGCC`   | 28087 | A_95_P000311 EB678624     |
| 28892 | 340 | 77 | 591  | CCCTTTTGAAAGAAGCTATTGAGGAACAAATGGACCGTTTTATACTTCAGGAACAGC/    | 28097 | A_95_P262191 BP134817     |
| 28893 | 340 | 78 | 1559 | TTGATCGGTAAGTCTTTGTTACACTGAACTTCTACTAGGCGATTTGGGTATTGAATATC   | 28099 | A_95_P115092 DQ229077     |
| 28894 | 340 | 79 | 822  | TGACTCATGATGCACCTCAACTTTACTGGCTTTGTCTCACATTTTCTAGCATTGATG     | 28101 | A_95_P292473 FG172609     |
| 28900 | 340 | 85 | 0    | CACTAACAGCCACAATATAGAGTTTTATATCTTGCTATCTCTCAGATGGGCAGACATG    | 28113 | A_95_P262186 A_95_P262186 |
| 28901 | 341 | 1  | 444  | TTTATTCGTACATGGAGTGGGGGGAAATGGAATTTTTATTTTTATTTCCCGGCCGTAA    | 28114 | A_95_P131912 EB432335     |
| 28903 | 341 | 3  | 700  | GCTTCTATGGGTTAACAGCTGCATGAGTTTTATGAGATACCTCTGTTTTAAATCTTATC   | 28118 | A_95_P150957 EB681112     |
| 28904 | 341 | 4  | 220  | ATTTGAGTTGAGTTGAGTCTTTTAAAGCCCGTTCGATAGGTCGCTAGCTCTGTTGTA`    | 28120 | A_95_P189277 AM833831     |
| 28909 | 341 | 9  | 1489 | TCATTAGAGACTCGAAGTGGCTGTGAAAATATAGTATGTTAATAGACCATTTTCTCCE    | 28130 | A_95_P007921 X75088       |
| 28910 | 341 | 10 | 1226 | CCACAGGTAAAATTTAACACTGTGTAAGCACAGGTGATCATATGAATGTTTTGATTC/    | 28132 | A_95_P181257 TA12938_4097 |
| 28922 | 341 | 22 | 323  | AGGCTGCATTTTTAGTTGATGTTCTTACATATTTAGCTTTTGGGACCTATATTCCTT(    | 28156 | A_95_P028101 CV015911     |
| 28926 | 341 | 26 | 636  | ATCAAATGCCAGGATCTTCTGGCAACTGATCTTGATAACCAGTCGGATTCAATCTCAT    | 28164 | A_95_P288503 FG641869     |
| 28927 | 341 | 27 | 774  | AAATTAGGACATGTTTACCTTTGTCTCAGTGCTTGCCTATTTTCCAATTCTCATGATTC`  | 28166 | A_95_P238364 EB450213     |
| 28935 | 341 | 35 | 836  | ATTCCTAGAAAAGTCTCCTGGTGCTACATGCATTACAATGCAATAACCCACCAAATA     | 28180 | A_95_P151152 EB681378     |
| 28951 | 341 | 51 | 513  | ATCATGACGCCATTTTGGAGTGGTCTTCTTCTCATATGCCTCAATAGTTGTGGTATTAC   | 28212 | A_95_P235664 BP136509     |
| 28953 | 341 | 53 | 854  | GGATTCTGATATGGTCAAATGTACCAAGTATTTGGGTTTTTACCTTGCATATGTATGA    | 28216 | A_95_P010206 DV159955     |
| 28956 | 341 | 56 | 732  | TGGCGATAGTGAAGTGGTGCCTTTCTTAAACGATCTCATTTTCTTTGGTATTTTGGCTA/  | 28222 | A_95_P273116 EB681626     |
| 28958 | 341 | 58 | 875  | TCTATGATTAACCAACAATACATGGAATAAATCTGACCCCTATAACCTGTGTATCA`     | 28226 | A_95_P009096 EB424911     |
| 28960 | 341 | 60 | 743  | GACGCTTAAGTGTGTTGGAATTCGTTATGAGTGTTATTGGCATTTTTGTACTAAGT      | 28230 | A_95_P208692 TA19023_4097 |
| 28964 | 341 | 64 | 396  | TTGAGTACTTTATGATGTTGAACCAGCTCGATTAGCCACTAATACTTGAGAATTTG/     | 28238 | A_95_P006546 FG638255     |
| 28966 | 341 | 66 | 575  | TTGATCGGCAGATGTTACTGCAAACCCATACGTTTTTATAGTAAACATATTTGTGGTC(   | 28242 | A_95_P305268 TC56113      |
| 28968 | 341 | 68 | 443  | TTAGACCACCAACCTCGAGTATGTACATATAACAGATAACTCTTGGCACTATCTAT/     | 28246 | A_95_P003881 FG641821     |
| 28973 | 341 | 73 | 897  | AATGTGGACGTATGATGAACAGTGCATGTATAGCTTGTCTGCTGGAACCTGGCTGT      | 28256 | A_95_P230669 EB439066     |
| 28975 | 341 | 75 | 4047 | GTAATTTGTATCAGTTTCTTAAACCTTCTTCTTCTTCCCGTTTGGGTGTTAAGAT       | 28260 | A_95_P182852 TA13319_4097 |
| 28977 | 341 | 77 | 459  | GATGTATGGTTATTGTTCCACTTTTTCGGATCTTACCCTAATAGCCGGCGATGTTGTT(   | 28264 | A_95_P133207 EB434512     |
| 28981 | 341 | 81 | 763  | GTCTCTTAATCTTTGCATTTGCAGGGAGATACTCTATGAAAGTAGCTGGGGTTTGTTC    | 28272 | A_95_P289748 DV160786     |

|       |     |    |      |                                                               |       |              |              |
|-------|-----|----|------|---------------------------------------------------------------|-------|--------------|--------------|
| 28983 | 341 | 83 | 79   | GTCTTTTTGTACAGTAACGCACTAGCAACAGTATCATTGCAAAAAGTTAGAACTTTTCT   | 28276 | A_95_P164362 | EH623576     |
| 28984 | 341 | 84 | 147  | GGATCTTTCATAACGTTGTGTTCTCTGCTGATTACTTTAAAGTTTATTGTAGAGCGTCA   | 28278 | A_95_P097308 | BP533978     |
| 28988 | 342 | 3  | 804  | CAATGATTTTTGTTGTGCGATTACTGTCTCAAGTACTTTGGTTAGTCTGTTCAATTGATG  | 28119 | A_95_P009671 | EB679132     |
| 28991 | 342 | 6  | 780  | TTTCATAAGCACGAGCAAGTAAAGGGGAGTTGACTTTCGTACACCTATGTGGACTT      | 28125 | A_95_P273491 | FG140044     |
| 28995 | 342 | 10 | 640  | GGATCAAATCTTGTCTTTTTGGTTCTAAATGTGCTTACTGTGACCAGGTTTTAAGAG/    | 28133 | A_95_P008061 | DW003467     |
| 28998 | 342 | 13 | 1169 | GTAGTTTTAATTTCTGGCCAGTTGTTATTTTCAGCAGTTTCAGTACTGAAACCATTGC    | 28139 | A_95_P186017 | TA14037_4097 |
| 29000 | 342 | 15 | 310  | AGAAGATACTGTCAGATTAAGGGAGTTGACCCAGGCAAACAACCTGGACTGTGCTA/     | 28143 | A_95_P002681 | CV018508     |
| 29001 | 342 | 16 | 779  | GGATTTAGGGTGTGATTTGAGAATCGAACTTAACTGCTTTTGGTTAATGCACAGTCTC    | 28145 | A_95_P177612 | TA12021_4097 |
| 29002 | 342 | 17 | 851  | AAATAAGGCTGTGAAGCCCATTGCTCCTATCATTGCTGGTTCTACCCTCATCAGTTTTT   | 28147 | A_95_P296923 | EB680455     |
| 29008 | 342 | 23 | 813  | CAGGACACTTCAAGCTCAAGTTCTGACATCTCTTAGGACAAACCATTTAGTTTTCATG    | 28159 | A_95_P125902 | EB680522     |
| 29011 | 342 | 26 | 756  | ACATCGGGTGGAGAACTATAGTTGCTGATTGCCATTTATTTGCATCGGAACACCA1      | 28165 | A_95_P022881 | EH618818     |
| 29015 | 342 | 30 | 773  | GCTTTGACAGGTTTTATTGGTGTTCCTCAAGTACACATGAAAGGAAACATAATTTTGCT   | 28172 | A_95_P012191 | DV158066     |
| 29023 | 342 | 38 | 452  | AAATAACACCAACTGTCAACTTGATCTCTCTCTGGATCTCAAGCATGTGGCTCAGG      | 28187 | A_95_P081835 | FG146160     |
| 29024 | 342 | 39 | 885  | GAGCCTTCTTATAACTGTGATGACTGACTTACTGCTTCAAGGATAAAGGAATACAAT     | 28189 | A_95_P015041 | TA12503_4097 |
| 29026 | 342 | 41 | 816  | AAGTACTACTGTGCAAAAGGATCCACTGCAATCAGATGATGACACCATTGTACAGAT     | 28193 | A_95_P290583 | FG155272     |
| 29027 | 342 | 42 | 471  | TTCTTAACTGAATTTTGTGGTGCAGATGTCATAGTTGCCAAAAGAGGGGTCTCA        | 28195 | A_95_P275658 | AM782821     |
| 29029 | 342 | 44 | 896  | AAATCTATGGCACTCTCGGTTTGTGAGATGATCAAAAAGTGCATGTACAGGAGC        | 28199 | A_95_P251974 | DV999997     |
| 29033 | 342 | 48 | 140  | TTTTGTCCATTTGACGTTCTCCATATATCTTACACGAATGTTATGGAAGCTCCCTGTCT   | 28207 | A_95_P144187 | EB447346     |
| 29041 | 342 | 56 | 595  | GTTTCTATACCTCTCACCTCACCTTTATATATTACTGAGCCGCCAAAAGAGGCATTGA/   | 28223 | A_95_P205347 | TA18264_4097 |
| 29042 | 342 | 57 | 580  | GTGATAATTGGGGACGTTGCGTCGTGAGTTGTTTACTCTTTAATTCTACTCTATTTTTA   | 28225 | A_95_P002606 | TA12227_4097 |
| 29043 | 342 | 58 | 285  | CTATATCGAGGTTCCGGTTCGCAATTTGGTATTTTCTAGTCCAAATGATTGTTGCTTGT   | 28227 | A_95_P047806 | BP131749     |
| 29045 | 342 | 60 | 689  | TCTTGACATCTTGATACAGTAATATCAGTGTTGCTGGTTTTCTCAGAAATTCAAGAA(    | 28231 | A_95_P164822 | EH624164     |
| 29050 | 342 | 65 | 758  | TGTGTTGTGCACCTCTGAACACATACTTCTAGTCTGTGATTACCACCTGTATGCCTTTG   | 28241 | A_95_P215277 | TA20449_4097 |
| 29052 | 342 | 67 | 796  | GGGCATCCCTCTGTAGCATCTTTTCTTAAAGTTATATTTAAAAGGATTTGATCCATTCT   | 28245 | A_95_P190367 | EB438557     |
| 29056 | 342 | 71 | 346  | TTCTTACAATCTCTCATAACAATAGCTTGGCCGCTTACTGGATCTGCCAAGGACTGT/    | 28253 | A_95_P102907 | CV016252     |
| 29060 | 342 | 75 | 593  | TTATCAAGACTAGGTTGCAGGTTTATGGGTTGCCAAAGATAGGAACTGCTAACGTTA     | 28261 | A_95_P138837 | EB442564     |
| 29061 | 342 | 76 | 599  | TCTGGAAATGATAACATGGGCACAACCTTGAATTCACAAAAACCGGTTGGTTTGCT.     | 28263 | A_95_P135892 | FS406206     |
| 29063 | 342 | 78 | 748  | ATACAAAGGATTTTTGGAAGGTGAAGCACATGGTATACTTTTGCATTATATGTTTGC     | 28267 | A_95_P152857 | EB683191     |
| 29065 | 342 | 80 | 833  | ACTGCTGTTGGCGAAGGATATTTTTGACAGATGCTCACATGGCGAAATTGTGCTAAT(    | 28271 | A_95_P199662 | EB677741     |
| 29066 | 342 | 81 | 424  | TAGCCTTTTGCCTAGTTTTGACATCTCCATTCTCCTTGGTTTTCATGTAGAATTATATGG, | 28273 | A_95_P140052 | EB444011     |
| 29067 | 342 | 82 | 1487 | ATATTTCTCTGGTTGCTTCTCCATGACCTGCCAAATGTCAAACGATTGAACTGACA1     | 28275 | A_95_P197647 | TA16610_4097 |
| 29070 | 342 | 85 | 575  | CTGCCATTTATTGCGTGCTTTTGTAGATTCTCTGCAACATAATTTTCAATTTGAAGTTCA  | 28281 | A_95_P140147 | EB444096     |
| 29071 | 343 | 1  | 949  | TATAGTTGGCTCTAACTTAGGGTCTTATATGTTGGTTCTGTTTAAATTAACGGTAGT     | 28282 | A_95_P216232 | TA20660_4097 |
| 29074 | 343 | 4  | 546  | CTTCTCACCGTTCTCTGCTATGTTGACTAAAACATTCCGATTATATTGCATTCTTGAA/   | 28288 | A_95_P092088 | TA17414_4097 |

|       |     |    |      |                                                               |       |              |              |
|-------|-----|----|------|---------------------------------------------------------------|-------|--------------|--------------|
| 29075 | 343 | 5  | 618  | G TTCAGCGCATT TTTGGTCTATGGCGTTTGTCTACATAGATTTGAGTAAAGAAATGT   | 28290 | A_95_P153052 | EB683366     |
| 29076 | 343 | 6  | 93   | CAGACTAATGTAGTGGCCAATTGCTGTTGAATTATGTGTTCCAAAAGTTCTACCGTTC    | 28292 | A_95_P103112 | CV016350     |
| 29079 | 343 | 9  | 826  | TTTGCCAGAATTTTCCCTTTCCCGGTTAATAAGTTTGGCACCTCGGTCTTTGAAAAA     | 28298 | A_95_P243892 | BP530068     |
| 29080 | 343 | 10 | 254  | CCTGTGATCGTATTTTCTTGATTTAGTCATTTGAAACTAAGCAAATCATGACAGAGTT(   | 28300 | A_95_P206682 | TA18571_4097 |
| 29083 | 343 | 13 | 636  | CTGTGGTCAGGGAAGGCTGAGCATTAAAGGAGATTAGAGAATTGAAAGAATCTTCAG     | 28306 | A_95_P045551 | BP131175     |
| 29091 | 343 | 21 | 517  | GTGCTAGTATCAGTGCTTCAAAGTGTATAGAAGTTAAAAGAAGCAATACAGAGGAA(     | 28322 | A_95_P068740 | BP137203     |
| 29094 | 343 | 24 | 208  | GAGCAAGAGCAAATAATTGTGTGTGCCATATCATGCGCAGTGAAATCATTGTAATC      | 28328 | A_95_P143917 | EB447105     |
| 29095 | 343 | 25 | 787  | TCGCTGCTTTCCACCCTGAGGTTATCTTTCAGTTAATTTTTAGAGCTCCTTGAATCC(    | 28329 | A_95_P126527 | EB425845     |
| 29097 | 343 | 27 | 676  | TTAAAATCAGTTACCAAGTTGCCAATTCTGATTAAGGGCGTTCTCACTGGTGAAGATC    | 28333 | A_95_P144957 | FG140029     |
| 29100 | 343 | 30 | 327  | GGGCGTCTGGGTATCCCTCCCTGATATAAACTTGACAGCCATGTATTAGTAAAATTT     | 28339 | A_95_P097563 | BP534107     |
| 29101 | 343 | 31 | 149  | ACATTAGAGCAAGGCGTCCAATGGCACAAAAGTATTGGTCAGATTGCAAAGTTTAAAGC   | 28341 | A_95_P158082 | FG643824     |
| 29103 | 343 | 33 | 736  | AGTGGTAGCTTGATTGAAGTCGACAAATCCTGCAGTCTCGTAATGATCCAGTGGTAT(    | 28345 | A_95_P270796 | EB435854     |
| 29106 | 343 | 36 | 781  | TATGATAAGAGCAATGCTGCCAAGAGTAGCTTCTAATGTGATTGCAGTCCTGCTTGA`    | 28351 | A_95_P146327 | EB450327     |
| 29108 | 343 | 38 | 3179 | CACCAACCTGGTAGTTCTTTATCTGTTGATTTCTGATTCTGGGAATATATATAGATGG`   | 28355 | A_95_P221292 | AB015221     |
| 29110 | 343 | 40 | 386  | ACTGTTATTGTTGTTTTGACATTTGAATGAGATAGACTGGAATGGCAGTTTTCCCC(     | 28359 | A_95_P127712 | FS377589     |
| 29111 | 343 | 41 | 289  | GTTGCCAAAGCGCAGTAAGTCTAAGGTATCTTGTGTATGCTCTAGATTCTGCTGCTG     | 28361 | A_95_P156852 | FG638507     |
| 29112 | 343 | 42 | 681  | TCTGAATACATCCCTTTCCGAACCGATTGAATGCAACTGTAAGTTCATGATTTTATCT    | 28363 | A_95_P316068 | FG198287     |
| 29115 | 343 | 45 | 1558 | GAAGCTGTTGGGCATACTTGCTTAAGTTTTGGTTTATTATATGCCTACTCTTAAATGTT   | 28369 | A_95_P155777 | TA14230_4097 |
| 29116 | 343 | 46 | 728  | GCCCTGTATCTCTTCTAAATTGTTGTAACAAGTGGACTTGCTGTACAGATTAAGCTTC    | 28371 | A_95_P289303 | DV158550     |
| 29121 | 343 | 51 | 123  | AATAGAGTTGCTTTATTAATTTACGAGGTAGGGTCATGCCTAACCCCCACCATGAGC     | 28380 | A_95_P129352 | EB429137     |
| 29122 | 343 | 52 | 394  | TGCCATGTTATGATAATCCAGCTTACAGTAATACTTTTGTATGCTTCTTAGAGGAGA     | 28381 | A_95_P102847 | CV016230     |
| 29126 | 343 | 56 | 668  | GGAACTTTTGAACAATTGTATGCATTAAGCGGTGATTATCTCTGGTATCAGCTTT       | 28389 | A_95_P296553 | EB677682     |
| 29132 | 343 | 62 | 610  | CCAAGTGTGGTTTGCTTGGACCACTGGATATAAACAGTAATGAAGATTGTTAAATCA/    | 28401 | A_95_P236259 | FG642265     |
| 29135 | 343 | 65 | 442  | GCAGTTCATTGTCAGTATGCGTGTGATTTGAGAAAGAGGTGAATTTGTATCAGTA/      | 28407 | A_95_P193137 | BP533083     |
| 29139 | 343 | 69 | 585  | CTGGAAAAGCGTTACTGCATCAATAGTGCTGCCCTGAAATTGAAGCCAAAGTAAAAAT    | 28414 | A_95_P112397 | FG645193     |
| 29141 | 343 | 71 | 1311 | AACTCAAACACCGTGATTTTCATTGAGCCTTTTTTGGTAGTTTTTGACCTTCGCGGTATA/ | 28418 | A_95_P012546 | TA15998_4097 |
| 29142 | 343 | 72 | 648  | GAAAAGTGGAGGTGAAAAGGCTGGCAAAAAGAACATAAATCTCCTTCCAAAAGCAAC/    | 28420 | A_95_P109337 | EH615247     |
| 29144 | 343 | 74 | 535  | CAGTGTGGTCTATGATGCTGTGAACTTCTATTTTCAAGATCATATTTGTTTTGGGTTA/   | 28424 | A_95_P019286 | TA16261_4097 |
| 29146 | 343 | 76 | 861  | CAGCTACCACTGCTTAAAATGCGTGGTCGAGCTTTAGACTGATCAAACCTGTTTGTCTG   | 28428 | A_95_P243257 | EB677187     |
| 29150 | 343 | 80 | 837  | GTGGTCAATGGCTCTTGATTGTTAATTTGGAATGAATAGTTTATCTGAAAAGTCTCTGC   | 28435 | A_95_P207482 | TA18750_4097 |
| 29158 | 344 | 3  | 170  | TTTTTAATAAACCCAGTTGGAATTCCTTGATCATCAAATCACCTCAGCTGAGTCTGCTT   | 28287 | A_95_P104562 | CV017070     |
| 29162 | 344 | 7  | 480  | GGAGCTTGAAGCTAAGGCACTCAATATCTTGCATTTTGGTTATATGTATATGCGTACA    | 28295 | A_95_P122327 | DW002324     |
| 29167 | 344 | 12 | 927  | ATTCTTTATCTCGTACACAATCCGCACATTTGGTGTCTAACCTTTGCCACCATAATGA    | 28305 | A_95_P023781 | EB427932     |
| 29176 | 344 | 21 | 495  | CTCTCCATATCACCTTTCCTTGTCTATAAATTTAGAGGTTTGGCCTCATTTTAAAGAG/   | 28323 | A_95_P059131 | BP134657     |

|       |     |    |      |                                                             |       |                           |
|-------|-----|----|------|-------------------------------------------------------------|-------|---------------------------|
| 29177 | 344 | 22 | 869  | TTTTGAATTTGAGCTGCAGCGAGTACTTCTCAGGACCATATGGAGAGGATGTTGTCTT  | 28325 | A_95_P245082 EB680256     |
| 29183 | 344 | 28 | 234  | GGGCCTTGAGCTCTACTACAATAATTCAATAGGTAACTTTTGGAATTTGAGGGTTTT   | 28336 | A_95_P004241 EH614565     |
| 29188 | 344 | 33 | 670  | GGTGGATCTTTGGTCCATTTTTGGTGATGTTTCATCTGTTTGGAAATTGTATAATCACA | 28346 | A_95_P212347 TA19813_4097 |
| 29189 | 344 | 34 | 656  | AAGCATATTCTTCTGGGGATGATTGGAATGACAGCACGCGATCAAAGGAAGAAGTT    | 28348 | A_95_P303158 FG200231     |
| 29190 | 344 | 35 | 435  | AAGTCCATTTTCTGCTGGTTGATGGTCCACTGCATACTCTCTAATTTCTTTACAATGTC | 28350 | A_95_P037453 BP129010     |
| 29196 | 344 | 41 | 1061 | TCTTGAGAATGTTGGTTGCCCAAATTATGAGGGTTTTCTTTACGTCATCCTCATTCTGT | 28362 | A_95_P179832 TA12594_4097 |
| 29197 | 344 | 42 | 339  | CCTCAAAAGGGGTGGGTGCAAAAATGTGAATACGAGGGTATACCTAAGTATTGCAA    | 28364 | A_95_P076595 BP527025     |
| 29199 | 344 | 44 | 324  | GGACCAGCATTGAGCAAGGTTGCTTGCCGTGGAATGAACTAGAATCCATCGTTCAA    | 28368 | A_95_P099158 BP534815     |
| 29200 | 344 | 45 | 587  | TAGCAGTAGCATTGTAGAGTGTTCACGTCCTTTTGCAGATATTGTACTATCATACT    | 28370 | A_95_P296653 EB678635     |
| 29201 | 344 | 46 | 499  | GGTGAATGTGCTGCAACTTTTCATGTTGTAATATCAAGTATAGTTGAATGTGAAAC    | 28372 | A_95_P184167 FG633777     |
| 29204 | 344 | 49 | 1470 | GACCTTCAAAATTCATGTGCGTTTTATGCACCAGCTAAATTTTATGACAATGCAAGG   | 28377 | A_95_P200222 TA17163_4097 |
| 29210 | 344 | 55 | 534  | GTGCCAGACACGTTTCATGTAGACTAGTATAGTAGAAAAGCTGGATCGAAAATATTTA  | 28388 | A_95_P213827 TA20131_4097 |
| 29212 | 344 | 57 | 407  | AAGATTTTACATGTTTCAATTTTGCATGGGCAAGCTTCTCTCATCCTGTTCCCCCTTT  | 28392 | A_95_P202832 TA17724_4097 |
| 29213 | 344 | 58 | 674  | ACGGAGAGCTTACTAGGTGTGGCGTGTGTTTGTAAATGACATGTAATCAATCTACTTC  | 28394 | A_95_P268666 DW002417     |
| 29214 | 344 | 59 | 610  | TTGCTGTAATCAGATCTTGTTATGACATTGTTTCTTTTCAATCCATGTTGCGTCATG   | 28396 | A_95_P295068 DW003989     |
| 29217 | 344 | 62 | 723  | TAATCGGAAGACTAGGACTGCCCTCTCTATCGTACAAGTGGTGACAATTCTGAGTTG   | 28402 | A_95_P195287 TA16083_4097 |
| 29223 | 344 | 68 | 456  | ATATGAGCTGGACTGTTTGGGATAGGTGGGTCATCAAGGACAATCCTACATTGAGAC   | 28413 | A_95_P090973 TA16928_4097 |
| 29226 | 344 | 71 | 548  | CATGGCGTTGGCAAACAAATGATTGATATATTGTCTCACTGATTACATTTTTCGAAG   | 28419 | A_95_P233674 BP525990     |
| 29228 | 344 | 73 | 596  | GTTTTGTAGATAGCAAGTCATGTAGCTGCAATAAACCGTAGTACAACCTGCTCGTTTT  | 28423 | A_95_P124407 DW004247     |
| 29230 | 344 | 75 | 251  | ACGTTAATGTATGGTGTCTTGACTTGGGGCATTATAAATGCACGTCACTTCTTTTG    | 28427 | A_95_P027541 EB429909     |
| 29231 | 344 | 76 | 807  | ATCATAGTCCTGTTACAAACTCAGTAATGCAATAAACAATCTTGTGTAAGAAGTGAAGC | 28429 | A_95_P180507 TA12762_4097 |
| 29238 | 344 | 83 | 20   | GTGCAAGGTGCTCTCAGAGCAAGTCTATAGAAACTACAGAAGAAAACCTTTTGCAG    | 28442 | A_95_P186507 DV162646     |
| 29240 | 344 | 85 | 417  | AGACCCATTTATGCAATTGACTGGGGTTTTGTTGTTGTTGTTGTTGTTATTGTGATC   | 28446 | A_95_P223672 TA22303_4097 |
| 29243 | 345 | 3  | 456  | TCATCGGTGGTTGTGGTCTTTCTGCTCTTACAGAGTTGAACTTCAACTGGATTGGTTT  | 28451 | A_95_P115947 DV158401     |
| 29244 | 345 | 4  | 842  | ATTGGCTTTGAGATCCTCGTGTCTCATGTGGTGATGCTGTGAGTTTCTACGAATA     | 28453 | A_95_P267831 FG174143     |
| 29246 | 345 | 6  | 499  | GCCGTTTTCAATTTTTGGTTGCTCCGAAGTCTGAACTCCCTTTCCATGTCTTAAGTTT  | 28457 | A_95_P181602 FG166414     |
| 29251 | 345 | 11 | 725  | TGGATGGGCAGGGCTTTCTATATTATTATCTTTCGGTGTGCTTTCTTACTATACTGGC  | 28467 | A_95_P297888 EH614391     |
| 29257 | 345 | 17 | 1502 | GCACAACCATTTATATCTCCCACTCATTCTTATGATTTGTATCTTGTGTGTTGTATTCA | 28479 | A_95_P004626 D61377       |
| 29259 | 345 | 19 | 881  | AACCTGCTCTTGGTTGCAGATGTACTTTCTCTAAAGGCATGTTGCTATAAGCGTTACA  | 28483 | A_95_P008256 DV162425     |
| 29263 | 345 | 23 | 186  | GCAATTTATTCTGCTATCCAAACTATAACATTTGCTTCCCCTTTGAGCCATACTTGT   | 28491 | A_95_P147887 EB643483     |
| 29265 | 345 | 25 | 419  | TCAAGAAAATCCAGAGCCTACTGCCGAAGAGTTACTGAAAGTGCACAGTCGGTTTA    | 28495 | A_95_P113897 CV021361     |
| 29267 | 345 | 27 | 592  | TTGGGGGTGCATTGGTTAACTGTGTTTTGAAGCAGATGACGGTTAAATTGTTTTAA    | 28499 | A_95_P122372 DW002359     |
| 29268 | 345 | 28 | 903  | AATCGCTGAGAGAATCGATCGCAAAGACTACGAAAAGCCGTTAACGACTGCTGGT     | 28501 | A_95_P204522 TA18084_4097 |
| 29270 | 345 | 30 | 750  | GTGATACCTTTGTTTTAGTGTGTGAGTTGTACTAGTTTTTGCCAACACAACATTAAC   | 28505 | A_95_P120242 EB439640     |

|       |     |    |      |                                                             |       |                           |
|-------|-----|----|------|-------------------------------------------------------------|-------|---------------------------|
| 29271 | 345 | 31 | 128  | GACCATTTTTACTGGTAAAGAACCCACGCATAAATATGTATACTCAAGTACTTTAC    | 28507 | A_95_P113477 CV021159     |
| 29274 | 345 | 34 | 999  | CAATAGCAGTGAAATGCGACATTTTCTTTATTCCATACCTGCCAATTGATTCATTCT   | 28513 | A_95_P017016 TA16447_4097 |
| 29275 | 345 | 35 | 869  | AGTGGTGGGGGAATTAACCTTTTGTGGATGATTGTAATTAATTGACTAACCTTCTTC   | 28515 | A_95_P291788 EB424882     |
| 29280 | 345 | 40 | 468  | GCCGATTTTGAGATATTTTCGTTCCAGAAACAACAGGTTATTTTTGGAGCTGCATTTG  | 28524 | A_95_P050516 BP132414     |
| 29281 | 345 | 41 | 819  | ACCTGACATGGAGATCTATTCAATGTATGGAGTCGGCATTCAAAGTAAAGAGCATA    | 28526 | A_95_P229179 EB682424     |
| 29282 | 345 | 42 | 1533 | ACAGGATGTAATTTTATTGGCACTAACATCTTAATTATCTTCGGCCAGCAGTTAATG   | 28527 | A_95_P190572 TA15044_4097 |
| 29284 | 345 | 44 | 66   | CAAATAGCGACTGAATCTTGTTCATACCTGAATGTATGATGTCAACATGTAATGTAC   | 28531 | A_95_P030821 EB436358     |
| 29288 | 345 | 48 | 1531 | GATCCGTGTGTATTTAATGCTTTCATATTCCAAGTCTGGTGAAATGAAAATGCTGAA   | 28539 | A_95_P199237 TA16950_4097 |
| 29295 | 345 | 55 | 353  | TGAGGACCATTTAGTTGGAGTTGTTGGTTATGCTGATATCTGGCTGCTGTTACTAAA   | 28553 | A_95_P092763 BP531958     |
| 29302 | 345 | 62 | 570  | CATGGGGTGCAAACGGTCATGTGTAAATACAGATGTATTACGATTTAGTAGTGTAT    | 28567 | A_95_P124542 DW004348     |
| 29309 | 345 | 69 | 2693 | CTCTTGATTGGTAAATGGTGTATCAGCAATGAATTTGCATTTGTTTATTACCCCA     | 28581 | A_95_P240134 Y10861       |
| 29319 | 345 | 79 | 1415 | GAGGGGGTGGAGATGGTGTGTTTGTTCATGATTATACAGTTTATACTTTTATAAATGA  | 28599 | A_95_P210382 TA19385_4097 |
| 29321 | 345 | 81 | 813  | ACTGCATCTTGCAACAACCTCCATTGACACCATAAAGTCCGATGCAGTGTGGGACAC   | 28603 | A_95_P242662 FG159787     |
| 29323 | 345 | 83 | 790  | ATACAAACCCGATGACATCCAACATTGTGAGTTTCAGCTGACTCTTGTGACGAAACGC  | 28607 | A_95_P186447 TA14130_4097 |
| 29324 | 345 | 84 | 626  | GGTTGAAGAAGTTCAAGTATTTGTTGTAATATTCATGGTACATTAACGGGGTCTGT/   | 28609 | A_95_P057721 BP134287     |
| 29325 | 345 | 85 | 872  | TAATAATGCCCTTGCTTAGCTGCTTAGCATATGCGCGGATGCTGGTTGTATTCCATT   | 28611 | A_95_P011436 DV999648     |
| 29327 | 346 | 2  | 783  | TTGACAGCAAGTTTTTCTGCTCCGGCATTGCACTAGAAAGGATGTTTTCAAATT/     | 28450 | A_95_P224592 EB447783     |
| 29328 | 346 | 3  | 573  | TTGTCCTGTGGTTTGTGGAGGATTTGGTGGTACCTACTTCTAAGTTTTAAATTAAC    | 28452 | A_95_P302873 FG640200     |
| 29330 | 346 | 5  | 655  | GCTACTTTCTGTTTCGATGCATATTGTTGTAGTAGTTGGAGTTGGTAATCCCTACATA  | 28456 | A_95_P023466 EB432693     |
| 29332 | 346 | 7  | 483  | GTGTTGTTTTGGCAATATGGCTCCTTGCTTTGTGATCAATCATTGGTCTTAGTAATTT  | 28460 | A_95_P206687 EH620540     |
| 29335 | 346 | 10 | 234  | ATCTTCCAAAAGAGTTGTCTCTCTCCACCGTCATCTCAAATGGGTAAGGATTGTA     | 28466 | A_95_P070430 BP192634     |
| 29336 | 346 | 11 | 364  | CATTGGACTGTTATCGCCTGCATGTCATTGATCTTGATCCATCATCAGTACTTCTGG/  | 28468 | A_95_P209567 FG641440     |
| 29337 | 346 | 12 | 637  | TATCCGACGTCAAGCTGCAGAGCTTCGCTATATATTGCAAGCACCTAAGCTGAAGAT/  | 28470 | A_95_P224542 EB447892     |
| 29342 | 346 | 17 | 794  | TCATTCTATATATGCACCGGTTCCAGCAGCACACTGCTACAAACTCTCGAAGGACAAG  | 28480 | A_95_P139177 EB442895     |
| 29347 | 346 | 22 | 955  | AAGCTTGCTTTTGGAACTCGGTTCCCTACGGTTCACATATAAAGTGTGGAAGATCGC   | 28490 | A_95_P187717 TA14407_4097 |
| 29348 | 346 | 23 | 1072 | CAAGTGATGTTGTTTCATCAGATACCTTCTGATAAATGAAAAGGCAACAAGTCTTCTC  | 28492 | A_95_P147737 EB643430     |
| 29351 | 346 | 26 | 979  | TTGAATTGTGGGTGCTTCGTGTTTGGAAATGTCTATTTCTAGGGGCACCTGTCTAGC   | 28498 | A_95_P027746 TA14463_4097 |
| 29352 | 346 | 27 | 768  | TGTTAAACAGCTTCCCAGATATCATCCTTGTGCAGAAGAAGATGAGAGTGGGTCAAT   | 28500 | A_95_P291678 DW005246     |
| 29355 | 346 | 30 | 839  | CAAAGTACCAGTGCCATGTGTTGATGTTGTGATTCTTTCTTACTGTTAGAATACAT/   | 28506 | A_95_P295998 EB449343     |
| 29356 | 346 | 31 | 725  | TATGAATGACATGTTTCTCAAGCTCTTAGGCTAAAAGAATGAAAAGCCAATGTTCA    | 28508 | A_95_P180947 EB438484     |
| 29358 | 346 | 33 | 215  | TCTCAAACAGTCGAGGGTGTCTTCGAGGTTTTCCGGACGGTCGATTTGGAATATATC   | 28512 | A_95_P102417 CV016012     |
| 29360 | 346 | 35 | 687  | GACATCCTAATGTAGCCCTGCATTGGAGTCAAAGATGTTTGTGATCAAATTCATGA/   | 28516 | A_95_P219762 TA21463_4097 |
| 29363 | 346 | 38 | 1749 | TTGAAGGGGGGAACATCCTAATGGATGAGTATGAGCACGTTATACATCTCATATTAG   | 28521 | A_95_P014231 TA12737_4097 |
| 29365 | 346 | 40 | 591  | AGCATCCAGCTATTTCCAGAATGCTGTGTGTTAGGATTACCTGACAAAGACCATGGTG/ | 28525 | A_95_P056446 BP133955     |



|       |     |    |      |                                                              |       |                           |
|-------|-----|----|------|--------------------------------------------------------------|-------|---------------------------|
| 29368 | 346 | 43 | 612  | CATGTATCATGTGGTACTTGAATTGGTTAAGTATGATATACTCAACGTGCTTAGATGC   | 28530 | A_95_P244027 FG644792     |
| 29373 | 346 | 48 | 799  | ATAGAGAGATCGAGCCATTCTCTGCAGCAAGGTGTCGCGTTTATATCGATTGCGTGA    | 28540 | A_95_P311788 FG158664     |
| 29375 | 346 | 50 | 799  | CGAGAGTTACTGTTATTTGGCATATTATGTTCCGTTTTGGCTATGCGATCAACTCAA1   | 28544 | A_95_P189347 TA14770_4097 |
| 29377 | 346 | 52 | 892  | GGAAGGGAGTTCTCTTCTATATTAGTAGAGGTACCCGTAATCCTGTATTGCGATTTCC   | 28548 | A_95_P218767 TA21249_4097 |
| 29380 | 346 | 55 | 1561 | GTGAACCTGTTGGCTTCTTATGGATAGATATTAAGGCCCAAGTCTTTCTGTTAAATTT1  | 28554 | A_95_P014331 TA13580_4097 |
| 29381 | 346 | 56 | 782  | GTAGTAGTTATGCTTATTTCTTGTTACTTCTAGAGACCCGTCATACCAAGATGTGT     | 28556 | A_95_P116547 DV159298     |
| 29382 | 346 | 57 | 862  | TTTTGTATCCAAGAGGATAGTTTTGAGAGCTTTAATAATGCAGACTGCCTTTGAAGTC   | 28558 | A_95_P152942 EB683269     |
| 29384 | 346 | 59 | 551  | AGAAGAGAGGACCAAACATTGGCTGTCTAATGTTACTTTCTGTGTTTATTATTAGCT    | 28562 | A_95_P124217 DW004071     |
| 29388 | 346 | 63 | 488  | CATATGGCAATGTAAGATTAGGAGCTGTAGGAATTGGGAATAAGAGCTGAATTATT1    | 28570 | A_95_P152937 EB446750     |
| 29389 | 346 | 64 | 396  | TCATGGAAAGTCGGAAATTATTCAGCTGAACTTGGAAGTATCTAAATTGTAGAI       | 28572 | A_95_P088413 BP530049     |
| 29398 | 346 | 73 | 326  | GGAGATCAGACTTTCTTTGAGTAATTGCATCCTTCATAGTATATATCACATTGCTATA   | 28590 | A_95_P095743 BP533315     |
| 29401 | 346 | 76 | 340  | GGTTAGCTCGAACCTTTCCGTATTATGATTTCAATTATGAATGAAAATTGTTGGATT    | 28596 | A_95_P308413 FG642283     |
| 29402 | 346 | 77 | 766  | CTGTTCAATTGTTGGGGTTTTGTTGAACCATGTCTACGGAGACTGTAACTTTTTATTTAT | 3665  | A_95_P000026 EB439159     |
| 29403 | 346 | 78 | 597  | AGATACTAAGTCAGGATTTAGATGCAACTGGGAAGGAAGAATTGGGTACTGAATCT     | 28598 | A_95_P019551 TC55128      |
| 29417 | 347 | 7  | 909  | TGTGATGCTGGCGATTCACTCATTATGTTTGACCATACTATTTCAATGCATACATGT    | 28625 | A_95_P250967 DV999231     |
| 29420 | 347 | 10 | 871  | TTCTTCGGATATATGATCTAAACCGACTCGATGCACCTCCAAGGAAATTGACAGCTC    | 28631 | A_95_P245252 DV162345     |
| 29423 | 347 | 13 | 967  | TGAGTTTGATACACAAAAAACTGCAAGATTACTGGTTGCTATTGTTGGCAAGTCCTC    | 28637 | A_95_P192057 TA15371_4097 |
| 29427 | 347 | 17 | 695  | ATAGATACAGATGTAGGTTTCGTTGTAGAGAAGTCTACCCAGAGAACCCTAAATGG     | 28645 | A_95_P293973 EB438961     |
| 29432 | 347 | 22 | 585  | TAACAGCTTTGACTTTTCAGTCATTGAGGTTAGTCCCATATGAGTAACTCCTTTATGTC  | 28655 | A_95_P133912 EB435628     |
| 29438 | 347 | 28 | 415  | CTAATAAATAGTTTCCGCTATATGTTTAGCTGGATAGGAGACGGGAGTACCCTGCAG    | 28667 | A_95_P081645 BP528313     |
| 29444 | 347 | 34 | 715  | TCTAAGAGAGAAGAAGCGCTGAAGCTTCTTGAGCTGACAATTTTATGGTCTCATCG     | 28679 | A_95_P263066 FG642025     |
| 29447 | 347 | 37 | 700  | AGCTTTTACATTCTCTGGCAAAATGAGTGGATTTTGAGAGGTTTCTAAGAACAATA     | 28685 | A_95_P298018 FG639910     |
| 29448 | 347 | 38 | 514  | CCGCTACATCAAGGTAAGTACTTTCTCGATTTTGACCATGTAAGTATTGGATAATTCAT  | 28687 | A_95_P309088 FG644660     |
| 29452 | 347 | 42 | 398  | TTGAAAAAGTGTGGAGTATTAATTAGGGGGCTGTTGAGTTGCGTAAATAAAGCTTC     | 28695 | A_95_P118182 DV161197     |
| 29453 | 347 | 43 | 443  | GAGGACGAATAAGTATTCATGCTTCGGAAGAGATATTTGAGCCTTGAAAAAGACCA     | 28697 | A_95_P110697 TA13256_4097 |
| 29455 | 347 | 45 | 343  | ATGCTTCAATGGCCATGTCCTCTCAAGTTACATGTACTTCATGGCGCCTTTGCTTGA    | 28701 | A_95_P095868 EB682879     |
| 29457 | 347 | 47 | 380  | GCAACATACTTCAGCAATTGCAGAACATGAACATCGTTGACTTTGATCCTAAGGGTG    | 28705 | A_95_P103827 TA12309_4097 |
| 29460 | 347 | 50 | 702  | AAGAAATGGTTACCATACCACTAATCGGTTCTAGCTATGATAGTTATGCTGGAACAT    | 28711 | A_95_P202467 TA17643_4097 |
| 29464 | 347 | 54 | 214  | GCACATCGTCCTTGTGCATTATAGAGAAGTAAAAGAGGTTATACAGTCTTATGATTG    | 28718 | A_95_P003576 EB430167     |
| 29466 | 347 | 56 | 1005 | GATGCTCCGGTGAAACTTTTTATTTTCGTGGAAATGAATTTTTGTTTTACGGAGCC     | 28722 | A_95_P249697 Y11212       |
| 29467 | 347 | 57 | 650  | TAACAATCATGTTTTAGTTGCAAATGTTGGCGATTCAAAGGCTTTCTTTGCTCTCAG    | 28724 | A_95_P302698 FG192418     |
| 29468 | 347 | 58 | 484  | CCTGACTGATTACGAGTAGCGTGATTTAAGTCTATGCAACTAAGTAATTTCTTTGCT    | 28726 | A_95_P009526 DW003068     |
| 29474 | 347 | 64 | 1033 | CCAGATATTAATACATATGACCTTGAAACTTACTGGTCTTAAAGGCCTTGCTTTACTA   | 28738 | A_95_P010686 TA14508_4097 |
| 29476 | 347 | 66 | 512  | GCATTTTGTATGAGCTTTAGCTAGGGGAGTTTATCTACCTTGAGAGGAATAATATA     | 28742 | A_95_P001701 DW004070     |

|       |     |    |      |                                                             |       |                           |
|-------|-----|----|------|-------------------------------------------------------------|-------|---------------------------|
| 29482 | 347 | 72 | 125  | CAATGTAATCTCCGATCAAATTTATGCTGCCAATAGCTGTTGCATTCATTTTCTTGTT  | 28754 | A_95_P092538 BP531847     |
| 29483 | 347 | 73 | 910  | ATTATTCGCATGGATCTTCTATCTGGCTTCACTTGTTCCAATGTGTAGTGTGTATCTC  | 28756 | A_95_P185082 TA13838_4097 |
| 29487 | 347 | 77 | 763  | AAGTGGTTCTTACTGCTGTACAATTGACAGTGGATCTGAAGCCTAATCTACCAGCC    | 28764 | A_95_P116572 DV159325     |
| 29490 | 347 | 80 | 1092 | TCGGGAATCTCCGGATCTATGCTTATTTTCAACTCCCCGAAGCATTTCTGCGATTACTA | 28769 | A_95_P033784 TA11649_4097 |
| 29491 | 347 | 81 | 803  | TTGCTGTTTCTTCGGTGGAGTGAGACCATAAAAACTAGCCAATTTTATAAGGTTAT    | 28771 | A_95_P196197 EB682700     |
| 29504 | 348 | 9  | 989  | GCGATGGAAACATGTGGCTATGTTTTGGAATTTTGACATCTGATAACAAAAGTAATT   | 28630 | A_95_P012976 TA15910_4097 |
| 29508 | 348 | 13 | 782  | GTAGTTTGTAGGAGCAAGAGATTACCTTAGTCCTCTGTTAATAGAGTGGCTGTAAG    | 28638 | A_95_P151567 EB681758     |
| 29509 | 348 | 14 | 1141 | ACCTAAACGGTGAAAGGCATATATTAGAAGAATCAAATGTTTTCCGATGCTAGAAAT   | 28640 | A_95_P017221 TA13249_4097 |
| 29513 | 348 | 18 | 106  | AACCAAGGCGGTTCCCGTCTCAGGTCTAGAGGGATATAAACATATATATCTGAGC     | 28648 | A_95_P151297 EB681522     |
| 29514 | 348 | 19 | 760  | CCCTTTCATTTGCTTTTATAAGTATTCCTTCTGTAATCAAAGTTCAGAGCTAAACTA   | 28650 | A_95_P016941 EB683010     |
| 29519 | 348 | 24 | 541  | GTTGTAGGTGTCACAGAAGTGTAAATTAATCTGAAATGTTGTTGTATTCCAGTCTCC   | 28660 | A_95_P028931 BP129677     |
| 29521 | 348 | 26 | 579  | ATGCTTGAAGTGCTCTCAAACAGTATCCAGTTTTAGGGAAGTTCGAATGATTGAA     | 28664 | A_95_P024141 FG644997     |
| 29527 | 348 | 32 | 155  | TTGATCGGTTTGTGACCAATTGGAAGAAGATGGTGAGCAAACTAAGAGGCAGGCA     | 28676 | A_95_P241795 AJ718638     |
| 29528 | 348 | 33 | 523  | TCTTGGGCATGTAGTTTGAAGTGTCTGGAAACACTATTTCTGCATCGAAGTATTTTG   | 28678 | A_95_P093398 BP532242     |
| 29529 | 348 | 34 | 500  | TTGAACAACCTTACATGTACGGAGCTGCAAGAGTTGAGAACTACCTTCTCACAAAT/   | 28680 | A_95_P274043 AM803406     |
| 29531 | 348 | 36 | 483  | AGGAAGGCTACATTACTCAGGATAAGAGCTAACTAACTGGTCATGTGACTTTTTCT    | 28684 | A_95_P015936 DW002874     |
| 29532 | 348 | 37 | 497  | AGATTTGTAGCATATTCTGCACTTGAATAACGGATTGGTTTGTCTTCTTCTGTTTCGCT | 28686 | A_95_P091193 BP531249     |
| 29533 | 348 | 38 | 809  | AAGATACCGGTGATTGGCGAAATCTTCTCCTCACTCTGGCTATTGTGATGAACTGTTG  | 28688 | A_95_P310958 FG139193     |
| 29539 | 348 | 44 | 854  | TGCATCACTATGTCAGACGAGCAGTTTCACTGCAATTTGGTATCCGGAGGATGAAAT   | 28700 | A_95_P313198 FG155310     |
| 29545 | 348 | 50 | 384  | CCCTGCATTTAGTCTTGGCTTGCTAGTTAAAGACTTCTTTTTGATCATGTAATTAATT  | 28712 | A_95_P204617 EB433325     |
| 29546 | 348 | 51 | 901  | CTTGTGTACCATTTCTTTTCCGTAAGACATACTGCTTAGTTTTTATGGTCTACATT    | 28713 | A_95_P185252 TA13872_4097 |
| 29551 | 348 | 56 | 840  | AGATACATCTCCTATCATTGTATAGGTTGCCTTCTTATACTTGTATGTCTCTCAGC    | 28723 | A_95_P145702 EB439273     |
| 29555 | 348 | 60 | 625  | AACTCGCCATTATTGCTCCGATCAAGTACTGAAGTCTAAATATACGTTGTTTGGAAGT  | 28731 | A_95_P090218 BP530864     |
| 29557 | 348 | 62 | 773  | TTCAAGATACACATATCCTCTAGGCAAAGGCGATTGAATGAAATTACAAAAATGTTT   | 28735 | A_95_P186267 TA14088_4097 |
| 29562 | 348 | 67 | 473  | GTGTATCAGGTTTTGTTTCCGCTTCAAATGTGAACTACTGTGTAGTTATATCTTCTTT  | 28745 | A_95_P030556 DW004407     |
| 29564 | 348 | 69 | 537  | CGTATTGCTGCAGCACTGATAGAGCGTACTTCCCTGGCTCTAAGGTTTTGATATCAT   | 28749 | A_95_P135152 FG140309     |
| 29569 | 348 | 74 | 236  | AGTGCAGTTCTTGCCTCTCCTTTGATACTTTAGACCCTTCATTTGCTTAGTAAATCTT  | 28759 | A_95_P129437 EB429327     |
| 29571 | 348 | 76 | 853  | TGGAAGCGCTTCCAAGCAGGATGTATTTGCTCAGATCGATGATGCATTAACACAGCT   | 28763 | A_95_P195387 TA16104_4097 |
| 29573 | 348 | 78 | 810  | ATTGGGATGCTCTATTACTTCTCGCCTTGGGATATCTTCACTTGGACTGGGTTTCAA   | 28766 | A_95_P267671 DW003261     |
| 29575 | 348 | 80 | 498  | TAAGCTTCTTAACAACCTTTAGTAATTCTGAACGATCAACATGCATATTTGTGAGCGGC | 28770 | A_95_P282148 AM818174     |
| 29578 | 348 | 83 | 296  | TGTGAAAGCTAAGTTGATTTGGAAGAATGCTGAGAAGAAGATTAAGGAAGCTAGGT    | 28776 | A_95_P114572 CV021675     |
| 29580 | 348 | 85 | 761  | ATGCTTGGAGCTAAGAATACGGATTGTTGATGCTGTATCGATGATGGCAACCAGGAT   | 28780 | A_95_P292063 FG159174     |
| 29586 | 349 | 6  | 392  | TGAAACCACAGAACCAACAAGGAGTTTCTTGGAGAAATTTCCGCTACCTGGAATGGT   | 28791 | A_95_P078340 FS423755     |
| 29588 | 349 | 8  | 814  | ACTATGACATTTCTTGGAGTTCTCATTAAACCTTCTGGCAAGCTGATTCATGTGT     | 28795 | A_95_P030526 DW000811     |

|       |     |    |      |                                                                |       |              |              |
|-------|-----|----|------|----------------------------------------------------------------|-------|--------------|--------------|
| 29589 | 349 | 9  | 0    | CTTGATTGGCAATTTTGATTGCCTGAATTGACAACCTTTGTTTCGTTTTAAATGAATGCGT  | 28797 | A_95_P252269 | A_95_P252269 |
| 29590 | 349 | 10 | 270  | CTGCCAGTGATGTATTTATATTTGCATGTATTATCCGAAATTCGGACTGATTATTTGGC    | 28799 | A_95_P028451 | AJ632813     |
| 29591 | 349 | 11 | 680  | CTTCTAAGATCTGCAAATATAGGTCGGTGATCTGATTGTAATAACATACTTCCTTCTG/    | 28801 | A_95_P216162 | TA20645_4097 |
| 29592 | 349 | 12 | 603  | CCACTGTAACCTTGCATCACGTTATCAGCTTGTATTTAGTAGTATTTAGATTTCAGATTTCA | 28803 | A_95_P208977 | TA19089_4097 |
| 29595 | 349 | 15 | 789  | CATGGATTTCGCTTGCCTCTTCCGTACATTTTTGTTCCAAAGCATATTGGCTAACTTTT    | 28809 | A_95_P016186 | EB684163     |
| 29600 | 349 | 20 | 766  | GTTGTA AAAACCATTACAATCGTTGTGTGGAGGACTTTGTTTCCAGTTTAACTTGTTA    | 28819 | A_95_P271121 | EB439696     |
| 29601 | 349 | 21 | 191  | GAAAAAGTGAAGCTCGCTCAATGAGAACAGCACGGATTTCATCCATCACTTACCTCTC     | 28821 | A_95_P210967 | TA19508_4097 |
| 29604 | 349 | 24 | 1050 | ATGGAGAACATTGTTTCATCAGAATGCATTATTTGTGGCAAATGGAGAACATTGTTCA     | 28827 | A_95_P013231 | TA14467_4097 |
| 29606 | 349 | 26 | 348  | GAAGAGTGAAGTGCATTGCGTGGAAAAATTAACAGCTGGAGTCAGAACTGCAGC         | 28831 | A_95_P104712 | CV017142     |
| 29610 | 349 | 30 | 648  | TGCCCTATATGTGATAGCATATCCAGTGTGCATATTTGTCAAGACAGAATAACACTA      | 28839 | A_95_P019416 | TA13279_4097 |
| 29613 | 349 | 33 | 681  | GGGGTATTGGATGAAGAAAAAATTCTGCCACTTGAAAAAGATATAACAGCTGTTGG       | 28845 | A_95_P116647 | DV159410     |
| 29618 | 349 | 38 | 526  | ACCTTGTTGCCCGCATGATTGTTGTTACGACAACACATTGGCTAAAGAAAGAATCTC      | 28855 | A_95_P021731 | FG632147     |
| 29619 | 349 | 39 | 441  | TGATTTGTGCATTACTGGTGAAGGCTATATGCCCAATTCTACAAAAAGACTACTTTT      | 28857 | A_95_P177662 | BP534995     |
| 29620 | 349 | 40 | 124  | ATTGTATACCTCCTGTTGTAGAGCCACGCTTTATCTGATCAAGTAGCATGAGTGAAAC     | 28859 | A_95_P103807 | CV016701     |
| 29623 | 349 | 43 | 607  | GTTTCAGAAGCTGTAGAATATGACGTAGGAATTTCTTTGATTTTATTTCAGCTCTAATG    | 28865 | A_95_P285883 | FG643102     |
| 29626 | 349 | 46 | 722  | AAACGACACCTTTGGAAGCCATTTCTGTAGATAAGGAAAGTCTGAGTGAAGTACTG       | 28871 | A_95_P300918 | FG196753     |
| 29630 | 349 | 50 | 641  | TAATGTTTTGTTGTACACCACTGGTGTGCAACAATGTTTCAGTGTCTTCTCTAATGGT     | 28879 | A_95_P108922 | DV161017     |
| 29633 | 349 | 53 | 814  | TGGTCTTCTGTGTGTCTTTGAGATAGGGGTAAGGTCTGGGTTTGTGTTGTTGA/         | 28885 | A_95_P218362 | DV158095     |
| 29637 | 349 | 57 | 203  | GTTCTATATTGTAATATTTGGATATGGCACCCCGGAGAGGGAATTGCAATACCCAGT      | 28893 | A_95_P131382 | EB431569     |
| 29638 | 349 | 58 | 915  | GTGTTAGCCTATTTCTTTTTCTTTGGGCTGATTAACAAGAAAACACCAACGTTTCAT      | 28895 | A_95_P209667 | TA19239_4097 |
| 29640 | 349 | 60 | 795  | CAGTGAACGGTCTGAACCATTTTGTATGAGATTCGTGCATGTATCATTTTCATCTTA/     | 28899 | A_95_P010891 | TA12346_4097 |
| 29644 | 349 | 64 | 628  | TGAGGCTATTACTGACATGACAAAGATCTTGGAAATTGGAACCTCAAATGACCAAGC      | 28906 | A_95_P268661 | FG644203     |
| 29648 | 349 | 68 | 401  | GAGTTAGTATTTATGCCCTGTATATATATAGGTAAGTACTGCGTCATTGATATTAATGAAG  | 28913 | A_95_P090833 | BP531110     |
| 29651 | 349 | 71 | 775  | CCTTTGTCTGCTTGTGTTGTATGACATATTTGGGTTTCTATTTCCGAGAGAATTCCT      | 28919 | A_95_P156567 | EH614287     |
| 29652 | 349 | 72 | 759  | ACTCCATTAACATAGAGAATAGTTGATAGCGGAGCACAGTTGTGGGATGGCGCTGA       | 28921 | A_95_P267411 | DV160064     |
| 29653 | 349 | 73 | 753  | CTTGCTATAAAATTTCTTATCCTGGATATGGTGTAGGTGTTGAATTGGATCCACAA       | 28923 | A_95_P013417 | TA12814_4097 |
| 29658 | 349 | 78 | 928  | ATATCTTATGAATAGCAGACGTTTCTGTGGGAGCTGCATTTGCACAAGCGGCTACA       | 28933 | A_95_P212902 | TA19934_4097 |
| 29659 | 349 | 79 | 787  | ACCTGTACGAATTTGGAAGTTGGTTTAAAGTTTTGATACCTGTTTCTCAGTGATACC      | 28935 | A_95_P242697 | TA11945_4097 |
| 29663 | 349 | 83 | 563  | TTGGCTTTGATCCATTTTGTGATTGAACCTTTTTGCTATTAGCTTGAAGAAGCTTTC      | 28943 | A_95_P031949 | TA21989_4097 |
| 29665 | 349 | 85 | 563  | CAGCAATCGAGGTCTATTTCTCCCTTTCTTCTGCAATTTTATGCCTAATATCATACGAT    | 28947 | A_95_P304503 | FG635940     |
| 29670 | 350 | 5  | 715  | ACGACGTGAAATATTGGGCTCACGCTTTGTTGCCTCATTCGTTTTTTCGTACATGACA     | 28790 | A_95_P301338 | FG199627     |
| 29674 | 350 | 9  | 446  | TCAGAGGATTGTTAGTGTTCAGTTTGGTTGTTGTGTATACTTTTTATCTGTACCTGC      | 28798 | A_95_P280458 | FG643681     |
| 29676 | 350 | 11 | 492  | ACCTATCCAGAGGAAAGTCGGTTGTGGCATTAAATGTGAATATTTATGGAAGTGTAT      | 28802 | A_95_P143032 | EB446415     |
| 29677 | 350 | 12 | 770  | GATGAGGATGATGGCAACAGTGAGGAAGTCATCAATGCCATTATGCATGATGTTGAI      | 28804 | A_95_P145332 | EB448999     |

|       |     |    |      |                                                              |       |              |              |
|-------|-----|----|------|--------------------------------------------------------------|-------|--------------|--------------|
| 29679 | 350 | 14 | 110  | CTCCAATCATGCTACTCAGACTATATGCTTAACACATGCAAGTCGAACCTTGGTTTTCC  | 28808 | A_95_P143992 | EB447190     |
| 29681 | 350 | 16 | 540  | TTCCTCTATTTTTGGGTAGTCCAGATGATATAGAAGAATTACAGAGTTATGGGGATG    | 28812 | A_95_P149562 | EB679464     |
| 29685 | 350 | 20 | 165  | ACTGTGAATTCAGTGGGCTCGGATTTAATTTGTTCTTCTATGCATTTCTGTTTCTCT    | 28820 | A_95_P130307 | EB430336     |
| 29686 | 350 | 21 | 738  | AACAAGATCCATCATTCCCTTTGCTTTCTAGAATGATGGCAGAACCTCAGACTCCCTT   | 28822 | A_95_P300348 | FG133179     |
| 29687 | 350 | 22 | 545  | AGTCTGCACTCATGATATTTTCTTCTATTAAGCTTGCAAGACAGTTTGTAGGGAGTT    | 28824 | A_95_P106907 | CV018115     |
| 29688 | 350 | 23 | 783  | GAAATAGTCTAATCTGGTACATGTAACAACCAGATTTACAGTTCTGGTAGCCATAGTT   | 28826 | A_95_P213582 | EB683159     |
| 29689 | 350 | 24 | 861  | CACTCACTTTCACTATGGACCGATAAGTACATGCCTCGATTGCAATATGCTGACTTTCC  | 28828 | A_95_P298758 | FG143943     |
| 29691 | 350 | 26 | 348  | ATTTGTGAAGTTCTCAAGAAAGACCTGGCTCAAGACACAGTCAATGGTTGGGGAGAC    | 28832 | A_95_P033939 | AJ717935     |
| 29694 | 350 | 29 | 685  | GGTGGATGCTGCGGCTAGTGTGAGATAGGTCTAAGTTGTAATGATACTGATAAACTT    | 28838 | A_95_P284073 | FG642702     |
| 29696 | 350 | 31 | 830  | GGGTGTATCCTAGTGAGCTATGTTCCGAGAGCATTGTTCAACACATGGAGATTAGAC    | 28842 | A_95_P293093 | FG152454     |
| 29697 | 350 | 32 | 1322 | GAGTGAAAGTGCTCTTTTCGTGGACAACCTTTTTATTTCTGGTTAAAAGTTATCGTTCT/ | 28844 | A_95_P015816 | TA15336_4097 |
| 29698 | 350 | 33 | 440  | GCACTTTATTCGTACATGGAGTGGGGGAAATGGAATTTTATTTTTATTTACAAAAT     | 28846 | A_95_P205102 | TA18208_4097 |
| 29702 | 350 | 37 | 105  | GGTTGCCATTGTGAATCTAGTTTTGTCTCATCTCAATATAAAATGTAGATGTTGCTGTAG | 28854 | A_95_P141217 | EB445002     |
| 29704 | 350 | 39 | 1280 | TCGTCTGATGATGTTTCTCCACAGCATGCTGGTGAAGAAAAGATTGAGACTCAGGTC    | 28858 | A_95_P020811 | TC50293      |
| 29708 | 350 | 43 | 876  | GTTATATTTCAAGACTCCTCCACCTTTTTCCCTTTTCTGATGCTGTTGTCTCATGTAA   | 28866 | A_95_P176972 | CK720598     |
| 29710 | 350 | 45 | 853  | CTCAGTTCCTTGGTGAAGGCTTTATGATTGCGTTTTCAAATTTAATGAAGCTTTAAG    | 28870 | A_95_P022111 | TA17098_4097 |
| 29715 | 350 | 50 | 144  | TACAAAGAACTCGAGAATGGATGTCTTTGGGAGGTTCAAGGGCAAGTAGGGTTGTT     | 28880 | A_95_P107412 | CV018357     |
| 29717 | 350 | 52 | 368  | ACTCGATGCTTTTATAGCTGCCCGCTAAATTCACACCCTGGAAATTTCAAAGTCATC/   | 28884 | A_95_P078805 | BP527608     |
| 29720 | 350 | 55 | 702  | TCAAGCTGCATCAAATATCACAGCGTAGTCTTCTCCAACCTTCTGTGGAGTCTGTCTC   | 28890 | A_95_P126892 | EB425446     |
| 29722 | 350 | 57 | 876  | CCGAAGACTAAAGTTGTGCTATTTTAATTATGTTGGCATGAATTCAGCATTGATGTAT   | 28894 | A_95_P198397 | EB426241     |
| 29724 | 350 | 59 | 843  | AGCCTGCAATTGTGTATGCCTCTTCCCTCTTATGGAGATATGATTGCTAATGTGTTTT   | 28898 | A_95_P010416 | EB443735     |
| 29725 | 350 | 60 | 1011 | GCATATCCCTCCTACATGAGTTAAGCATGCTTGTTTGATTATGAGTAATTGCCAAAAT   | 28900 | A_95_P216152 | TA20643_4097 |
| 29726 | 350 | 61 | 0    | TTTAGGGAGTTTTTACCAGCTTTTGGCGTCTTCTCTGCCGGAACCTCAGTTTTTCCG    | 28902 | A_95_P236779 | A_95_P236779 |
| 29727 | 350 | 62 | 795  | GCGGCGAATGGATTGCGTGTGTGACTTTTATTAACAATATATATGCAGGTAAATTA/    | 28904 | A_95_P234649 | DV160879     |
| 29728 | 350 | 63 | 338  | GTCTTTGTCTGGCGGTCTTCTGAAGGAAAAGAAGGAAAAATGTGAAGGAACTAAA/     | 28905 | A_95_P226639 | AM826041     |
| 29730 | 350 | 65 | 1010 | AACTGGATATGGTCACTACATCCTTCTATAGTTCATTGGCATCAAGTTTGGTGTCACT   | 28909 | A_95_P011466 | TA15775_4097 |
| 29731 | 350 | 66 | 421  | TTTGCCAGTTGCATTATGAAGCATGGGTGAGATTTGTTGTTCTGAGCATAGTTACAC    | 28911 | A_95_P052561 | FG143081     |
| 29736 | 350 | 71 | 758  | GAATCTGATAGAGCAGCAGAGGATGCGTGATTGGTATTTGTCCATTGTAATTTGCA/    | 28920 | A_95_P147457 | EB451895     |
| 29738 | 350 | 73 | 1743 | TGTGCAACTTAAGTTGGGTTAAGTTTTCAGCTCATCTATTGACGTTGTCTTCTCATTCTT | 28924 | A_95_P188622 | TA14611_4097 |
| 29742 | 350 | 77 | 808  | TTATGCTGCACCTTTCTGTCTAACTAAATCTGTCTCGATCAGTCTTCTTGTCTCCATTAC | 28932 | A_95_P029156 | EB426381     |
| 29746 | 350 | 81 | 623  | ATTTATGAACAGTATGTGGCATTGCATGTTAATTATGGAAAGAAAAGGCCTGGCCCC    | 28940 | A_95_P241415 | EB684021     |
| 29749 | 350 | 84 | 490  | CTGATGTTATAGTCTAGAATATCCCCATTGTGTTCTTAGAATGATCATTGGAAGTTGT   | 28946 | A_95_P203677 | TA17904_4097 |
| 29756 | 351 | 6  | 2714 | CCTGTTTCATGGCCTCGCCAGTTTCTTTTTGAAGAATAAAATTTCAAATAACAAGAACT/ | 28959 | A_95_P010241 | TA15676_4097 |
| 29757 | 351 | 7  | 1040 | TGTAGCTCAGCGGATTGGCGTATACACAGCCAAGGACTATGCTGATATTCTGGAATT    | 28961 | A_95_P012081 | TA16904_4097 |

|       |     |    |      |                                                             |       |                           |
|-------|-----|----|------|-------------------------------------------------------------|-------|---------------------------|
| 29759 | 351 | 9  | 896  | CAAAATTTGCTACTCTTTGCAAATTCGGTATGAAACTGGTCTTTCAGAATCTACTCTCC | 28965 | A_95_P190352 TA14997_4097 |
| 29761 | 351 | 11 | 285  | TCACGAACTTGTGCGCCACGATGTTAAACAAGTTGTTGTGCTGTATGCGACTGA/     | 28969 | A_95_P148142 EB432321     |
| 29765 | 351 | 15 | 532  | CTTCATTTTTCTTGAATAGGACATTGGCTTTAGCATGGAGTTTACGAATCTTCCGG/   | 28977 | A_95_P068250 BP137086     |
| 29766 | 351 | 16 | 126  | GATTTTGAAGAACCCTGCATGTGTTCCAAGGACATAGTGGGGAGACATTGGATG`     | 28979 | A_95_P274248 TA21917_4097 |
| 29768 | 351 | 18 | 395  | TTTCATGGGTCTGAAATTTTGTGCTCTACTGCTGATTCACTGCGTTGCTAGCTCCGA1  | 28983 | A_95_P096518 BP533665     |
| 29771 | 351 | 21 | 255  | TCCCCTGCTCATCTTGACTGCTGGTACCTAATCTTATCTTATGAAAACCTAAAAGAAG/ | 28989 | A_95_P095228 BP533086     |
| 29777 | 351 | 27 | 776  | TTGCTTTCATGAATTTGCTAAGGGACAGGCACGTTAGCAAATGGCATAGCAGATG     | 29001 | A_95_P228134 EB451350     |
| 29780 | 351 | 30 | 833  | AGGTACAAGTGAAAAAGTTATTGCTGTAATAAAAGGGTGGGAAGACACGCTTCGG     | 29007 | A_95_P010301 DV999902     |
| 29781 | 351 | 31 | 945  | GTTAGGTGGGAATCTTTCCCTTACCATTCTTATCTCATATAGTTGCCTTTTGTCT     | 29009 | A_95_P009896 TA15282_4097 |
| 29785 | 351 | 35 | 321  | CAAACTTGATGTATATAGAAATAGGAGGCTGAAAGTGCCAGATTGGTGGAGATAG     | 29015 | A_95_P032241 AM844046     |
| 29787 | 351 | 37 | 279  | TTGGGTACTTGGGGCTGAAAAATGTTAGGTTTCTAAGTTTTGCTTGTCAATGATGT    | 8937  | A_95_P000091 AJ717873     |
| 29790 | 351 | 40 | 811  | CAGTTTCAACTATAAGGCTTATCCTTCTTGTGAAAGTTGTGAACATAGTGTACATTAC  | 29024 | A_95_P134942 EB437933     |
| 29793 | 351 | 43 | 1024 | GTTCAGCTGCTGTAAAGATACTCTTTTATGTTCTAATGCCTAATGGACTGAAAGTTA/  | 29030 | A_95_P198157 TA16718_4097 |
| 29794 | 351 | 44 | 742  | GTTGTCTGTGGGCGATGACCTGTTTTGTATTGTATATTTGAGCTGTCTATAAGATAA   | 29032 | A_95_P246182 EB681232     |
| 29803 | 351 | 53 | 720  | GTGAGACAATTATGAGCAATATGAATTGTAGCCTACAATCTATTAGCTGGTTGAGAA`  | 29050 | A_95_P180802 DV157753     |
| 29807 | 351 | 57 | 769  | TAGCTATGATGCCAAAAATGATATTCTTTTTCTCCGTCCATTGATCCCAATAGCCTTC  | 29057 | A_95_P016021 DV159904     |
| 29808 | 351 | 58 | 385  | ATCTTCAGTCAGATTTGGATGTATCTAAAGTCGACCGGTTTTAATGAGGTCACCGACT  | 29059 | A_95_P214562 DW003267     |
| 29810 | 351 | 60 | 599  | GCCGTTTCATCGCAGTATGCAAGAGTGAAGAGGGAGATTTACCAATTAATTTGTCTG   | 29063 | A_95_P305303 FG201973     |
| 29813 | 351 | 63 | 863  | ATGCGACTCGTCTACTGGCTCTGATGCTTCGAAATCTGGCTTGAGAGCTATACCAAT   | 29068 | A_95_P226414 DV161544     |
| 29814 | 351 | 64 | 926  | TGATCCTTTTGAATAGTGTGGCAATGTTATTCTGGCTATTCTGGTTCACGCCATTCT   | 29070 | A_95_P116607 DV159363     |
| 29815 | 351 | 65 | 358  | TGGTCATCTCCTGTTTCGTGATGCTTTATTAGGTTATGAATAGAATAAAATGTGGAG   | 29072 | A_95_P127087 EB447417     |
| 29819 | 351 | 69 | 854  | CCACATAATTCATCATTCTCATCTGGCTGGATTTGTGTTTTGCAAATTTTAAAGAAGCC | 29080 | A_95_P292638 EB427870     |
| 29822 | 351 | 72 | 1096 | CAATATACTTGGCAAATTTGTTAAGAAATTTTGTTCCTGTCAGAGATCTACTTGGCC`  | 29086 | A_95_P176457 Y14432       |
| 29825 | 351 | 75 | 731  | TGTTGTAGCCCTGATGAAGTAATATTTGGCCCTGATTTCCAACAATCTTTGTACTGTC/ | 29092 | A_95_P205152 TA18219_4097 |
| 29826 | 351 | 76 | 513  | CGTCGTGCTAGTGGACTTTTCTTGTGTTTGTAACTCTTTGTTTCACAGTTAACCCTTTC | 29094 | A_95_P203082 TA17778_4097 |
| 29827 | 351 | 77 | 576  | TATGGCGAGAGGTGGTCCTGCTAAGGATGACCTCGAATCGAAGAACAGTTGTAATC/   | 29096 | A_95_P054066 FG144419     |
| 29830 | 351 | 80 | 867  | GTGGACACTGATCTCTCTAAACCATTTCAAAGAAATGTTCCAAAAGAAAACTTTTCA   | 29102 | A_95_P217887 EB425233     |
| 29834 | 351 | 84 | 825  | GTATTCATCATCATCATCCTCATGTTGGTCATCCAAAATTTGGATTTAATACCTTACT  | 29110 | A_95_P294958 EB443115     |
| 29839 | 352 | 4  | 513  | CACATATGGCTGGAGCGAACAAGTTTCGCAATGCTCAATTTTCATGGGTCCTGAGA.   | 28956 | A_95_P261896 BP133968     |
| 29842 | 352 | 7  | 119  | TTCAGGGGGAGCTATATACATGGCAGTACTAAGTTGCAGTAAGTGCCTTGCCTTCA    | 28962 | A_95_P034918 BJ999167     |
| 29843 | 352 | 8  | 455  | GTATGCTATAGTTTGTGCTGTTATGTCGAAAGTTTTCTGTGATATTTTCTGAAATC`   | 28964 | A_95_P192907 TA15556_4097 |
| 29845 | 352 | 10 | 723  | GCCTTTTTCTGAAGGCAGATCCACAGAACTAGAATCACAGATGTTTTATTATAAA     | 28968 | A_95_P135857 EB439411     |
| 29846 | 352 | 11 | 115  | CCGCGATTGTTAACTACAATTGTAGCTAGCTTCATGATCCTTGCTACTTGTATTTATT  | 28970 | A_95_P030636 EB432279     |
| 29847 | 352 | 12 | 290  | GGAAGGTTGAAGAAATGTGTATGAAGTATAGGAAGGTGATTATTCTGGTTGTAAT/    | 28972 | A_95_P161742 EH620369     |

|       |     |    |      |                                                              |       |                           |
|-------|-----|----|------|--------------------------------------------------------------|-------|---------------------------|
| 29852 | 352 | 17 | 249  | CTGTTAGCTTGTGAACTTTAACCGCTGTTGGTGAATCTAAAGACTAGTACCTTTAAT(   | 28982 | A_95_P064655 BP136109     |
| 29854 | 352 | 19 | 308  | AAGACTTCAAGCTTATTGGGGATGCCGCTACTGCTTAACACGTGCTAAATGAATGCC    | 28986 | A_95_P108467 FG637164     |
| 29858 | 352 | 23 | 195  | TTAACTTGAGCTACTTATGTATGGAGTACTTTCTGTGCTACAATTTGTGCCTTTTCC(   | 28994 | A_95_P139362 EB443105     |
| 29864 | 352 | 29 | 877  | CAAGACTTTGATAAGCTCATTAATGATGGTCTCCAGGACCAATTGCTCTTGCTCTATT   | 29006 | A_95_P115972 DV158471     |
| 29870 | 352 | 35 | 756  | GGCACATTGTGCCATATAGCTTATACATGATGTTTTCTATGTTTTCTGCAACATTAAT   | 29016 | A_95_P129867 EB429803     |
| 29872 | 352 | 37 | 321  | ACGGCTGTGAAGCTAGCTTGTGAACCTACTTTATCTGGTGTATTAGTATTGAATTG     | 29019 | A_95_P133847 EB435545     |
| 29873 | 352 | 38 | 268  | CCTTGTGAATCCTCCAACCTGTGCTCTTTGATCTTTACATATTCTCTGCATATATATGT( | 29021 | A_95_P011981 TA14209_4097 |
| 29877 | 352 | 42 | 595  | GCATTTGCATTACCATTTATCAGTCATTTGGGGTCAAAGATTGCCTCTTAGACCCCT(   | 29029 | A_95_P123912 DW003780     |
| 29880 | 352 | 45 | 585  | TGGTGACTACAGGGCGCGAGATAGATTCAATTCAAGGCAAGGACATTATCAAAGTA/    | 29035 | A_95_P097788 BP534194     |
| 29882 | 352 | 47 | 909  | GGGCCCTCTCTGGTTTCATTTGCTTTATGATTAATGACTGAAAGATCCAGTTGGAAAA   | 29039 | A_95_P230929 AY029330     |
| 29885 | 352 | 50 | 800  | TGCTAGAGAATGAAAGATTGGCGGGTCTAAATGAAGGATTTTGTAGTTTTGTGCGC     | 29045 | A_95_P006841 NP916736     |
| 29886 | 352 | 51 | 848  | GATTACTGATTGTAATATTTTGTGTTTGCATAAAGTGCTCATAGCGGCACTTCATTCT(  | 29047 | A_95_P201952 TA17530_4097 |
| 29887 | 352 | 52 | 695  | GGGCTTTCCATCAAGGAACTGAAATTTAATGTTACATTTTACAGAGACTGATTATTG    | 29049 | A_95_P015956 EB439763     |
| 29891 | 352 | 56 | 820  | ACATCAAGAACGTGATCATCCACGGACTCCATATTCATGACATTGTGCGAAGGAAGTG   | 29056 | A_95_P217717 EB428683     |
| 29892 | 352 | 57 | 688  | AGATGTTATTCTAATTTCAAGTAGAGCGACGATCTTGTCTTGTAAACAAGGGACAACCA/ | 29058 | A_95_P182242 TA13166_4097 |
| 29899 | 352 | 64 | 775  | ACAACTAGTAGATTACATGACTGCAGACATGAAGCTGTCTATGATATGCGCAACAG     | 29071 | A_95_P015191 DV157952     |
| 29900 | 352 | 65 | 220  | TGTTGACGGTAGTTCCGGGTGTGTATGGATTTAACTCTTTTTCTGGCTTTCCTACCTTC  | 29073 | A_95_P110932 TA13705_4097 |
| 29901 | 352 | 66 | 856  | TTTCTCCCTTTTTCTCTCTGAGAACGCGGAAGGAGGAGGAGAATCAGATGATTCTC     | 29075 | A_95_P194937 TA16011_4097 |
| 29909 | 352 | 74 | 849  | TGGCCAATATGATGGGAGGATTTACCAGTCCTTTTGTGGGTTGAAATAAGGTTATT(    | 29091 | A_95_P180717 TA12812_4097 |
| 29912 | 352 | 77 | 1117 | TGTATGAGAACGTTGCTGAGTTTTCTGCAACATAATGTAATCTGCGATCCTTTTCCCC   | 29097 | A_95_P015396 TA13588_4097 |
| 29915 | 352 | 80 | 798  | ACAGACTTAGCTTCTCTGATGTGATGTTGGAATTGATATGGGACCCGAGTTGCTATG    | 29103 | A_95_P230654 FG155645     |
| 29918 | 352 | 83 | 2690 | GGGTGGGTTTGGGAGATATAAAGCTGCAAAGAGAACGTAATTTCAATAGTAAGGTA     | 29109 | A_95_P007346 AF053104     |
| 29920 | 352 | 85 | 693  | GCAGCGAAAAGTCTGCTACTCTATGGGGGCTCTCATATAGACATCACTAATCTCATT    | 29113 | A_95_P297558 FG187304     |
| 29923 | 353 | 3  | 869  | AGGAGGGCGCAACAGTGTATATAAAGCTCAGCTTTCTGATGGAAAATCAGTGGCAG     | 29118 | A_95_P118397 DV161441     |
| 29927 | 353 | 7  | 370  | ATTGTTTGGCTTGCAGAATTGGTTCACATCTGCTGATCGGCTGTAGATTGATCGTCT    | 29126 | A_95_P104537 CV017059     |
| 29928 | 353 | 8  | 845  | TAAATTACGGACTCCGGTATTGGATTTGCTTAGAATGTGCTAGTTGCTTTTCCAACAA   | 29128 | A_95_P123787 TA13072_4097 |
| 29929 | 353 | 9  | 483  | CAATTCATTCTTTGACTCATTGTGAGGTTCTTGAAATATGTAGGGTAAAGTTGAAAG    | 29130 | A_95_P276473 AM799834     |
| 29930 | 353 | 10 | 348  | TCTCCGATAAGATGAGGGCTACTGGAGGTGGTGAAGAAAGAAATGAAACCTGTAT      | 29132 | A_95_P104522 CV017053     |
| 29931 | 353 | 11 | 930  | GTTATGTTGTTTGAATATGAATATGAACACACACATATACCCGGAGTATGTTGTGA(    | 29134 | A_95_P267246 DV159437     |
| 29935 | 353 | 15 | 500  | GAGTAGCTTATAACTTCGTTGGATGTCAAATGAAGTAGTAAGAAACATATTGTCGAG    | 29142 | A_95_P000321 FS412805     |
| 29936 | 353 | 16 | 236  | CTGGAATGGCATTGTTGAATCCAATTTTTCGGTTATTTCAATAGGCTTAAGAAGGAA/   | 29144 | A_95_P103097 CV016343     |
| 29938 | 353 | 18 | 416  | ACAGGTGGAGCAGCAAGTAACCAAGCTGGAGTACTAATAAGTAGGATCTCGCATT(     | 29147 | A_95_P276608 AM784309     |
| 29943 | 353 | 23 | 859  | TTTCTCAGAATTGTAGACCATACACACACCGGGATATGAAGAAATTTTCTTCGACGTT   | 29157 | A_95_P192062 TA15372_4097 |
| 29946 | 353 | 26 | 719  | GCATTGGTAGCAACCACAAATTGAAATCTACAAAATTTGGCGCAAGCAACAATTTGT/   | 29163 | A_95_P182917 TA13336_4097 |

|       |     |    |      |                                                             |       |                           |
|-------|-----|----|------|-------------------------------------------------------------|-------|---------------------------|
| 29947 | 353 | 27 | 746  | TGAGATCTTGGAGAGAGTCAGAAGCTTCAATAACATTCATAGTTGGAAGGAAATATT   | 29165 | A_95_P215087 EB678557     |
| 29951 | 353 | 31 | 814  | TCTTGAAAGATAAGCTTGAATCAAAGGTCTCGTGATTACAGACTGGGAGCCGCTTGA   | 29173 | A_95_P191032 EH615740     |
| 29953 | 353 | 33 | 762  | CTGTCTCTACCTCAACATTTGAGTTTGAAACTGTCATTGGAAATGTGTTTCAATTCTTT | 29177 | A_95_P105527 DW000646     |
| 29957 | 353 | 37 | 1410 | TCTGATGTTTCTGTGTGTGCGGAATGTGCTATTCAATGCCATCTAGCACGGAATGACT  | 29184 | A_95_P215562 TA20513_4097 |
| 29959 | 353 | 39 | 492  | GCTATTCTAATAACAATGATTGCTCTTGATAATGTTGTCTCTTTTGAAGAAGGTGAGG  | 29188 | A_95_P153397 EB683684     |
| 29960 | 353 | 40 | 867  | TTGATAACAACGAGTATTTGAGAATAAAGGCCGTGAACCTCGGGACCATCACCGTTA   | 29190 | A_95_P260751 EB677958     |
| 29961 | 353 | 41 | 868  | GAAGAGGTAGATGCACTCTTGGACAAGTGCCTTTCTCAAGCATTACATACGACAAT    | 29192 | A_95_P008211 DV999212     |
| 29962 | 353 | 42 | 1313 | GGCCAGAATTGCCATAACTTGGTCAAGAAAATTTCTTGAAAGCTCTTTGTTATTATG   | 29194 | A_95_P191162 TA15169_4097 |
| 29971 | 353 | 51 | 763  | CCCAACTAAGATTGACCTATAAATCAGTAATTGATGCATACAGCTGTGATTGTTACT   | 29211 | A_95_P123932 DW003796     |
| 29977 | 353 | 57 | 429  | AGGTCATTTTCTTTGACGAATTTGTTGTTGGACAAGATGAAGGAGACAGCACGTAA    | 29223 | A_95_P126702 FS435586     |
| 29981 | 353 | 61 | 694  | GCAATCACGTGGGAAACATAGGAGCTCTGTATAAACATGTATAGGTTAAAAATTACA   | 29231 | A_95_P235134 DW001858     |
| 29986 | 353 | 66 | 561  | AAAGTGATAGTATTTGATGATTTTCCAGCTGACAAAGCTAGAGCAGTGATGTTATTG   | 29241 | A_95_P150912 EB681065     |
| 29987 | 353 | 67 | 261  | AGATCACAAACCAAGCCACTGTTGACTATAGAAGATAGTGCCTGACACATGCAGAGG   | 29243 | A_95_P005016 AF127243     |
| 29994 | 353 | 74 | 162  | ATGCAAATGGTGGGTGCAGATTGGTTGAAGCTGACAAACGAGAAGATGATCTAGG     | 29257 | A_95_P116622 DV160201     |
| 29995 | 353 | 75 | 702  | TTCCTGGTCAATGCAAAGGATGTTATTAGACCAAACCTTGTGAGTCCGTGAAGGCATA  | 29259 | A_95_P132252 EB432691     |
| 29998 | 353 | 78 | 751  | ATGACACATATCTACCTTTCTTTTGAAGCATGCAATGACGAAAGTCCGATGTCCGC    | 29265 | A_95_P310849 FG163453     |
| 30001 | 353 | 81 | 625  | GGGAAATGTTACCTACCAATGGAAAAATCGTTCTTATGGACCATACAAATGTTCTAG   | 29271 | A_95_P291518 FG640068     |
| 30006 | 354 | 1  | 770  | GGATGATTGTGAACTCCTTGTTAGCTCTTTTTATTATCCCTTCTCCAATATGCTCCAT  | 29115 | A_95_P156587 EH614311     |
| 30007 | 354 | 2  | 836  | GTGAAATCATACTTTGATTACCTGATGGTAGTTTGTGTATGGCCATGATTCACTACT   | 29117 | A_95_P216272 EB451507     |
| 30015 | 354 | 10 | 743  | ATGGAGGTTACCAAATACCATACGGCTTCTTGTTCATATTGTTACCTGTGCCAATTA   | 29133 | A_95_P196592 EB451156     |
| 30017 | 354 | 12 | 767  | AATTCTCGATATCTTGGCAGTGAAGGGATCATGGGTATGAACCTAGAGTCCAATAC    | 29137 | A_95_P117327 DV160221     |
| 30019 | 354 | 14 | 192  | ACTTGAAGATTACATAAACTCTGTACGTCGGCCTTCTTAGAGTATCGGTCCATATGAT  | 29141 | A_95_P103427 CV016498     |
| 30020 | 354 | 15 | 386  | TTCAAGTTCTTGATTTCTGGTTCAGATTTGGTCGGTGTACTCATTCAATCCAATTCAT  | 29143 | A_95_P085325 BP529250     |
| 30023 | 354 | 18 | 632  | GGTAATCACAGTGCATTTGAACAAATATGATGTTAAAGAGTAATACTTACCCTTTCTG  | 29148 | A_95_P020201 DW005223     |
| 30024 | 354 | 19 | 340  | GAAAAATGCTCTGGATCAAGTTCATTTTGTGGGTGTGCTATTGGAGCTGTTGACGG    | 29150 | A_95_P128152 FG167375     |
| 30025 | 354 | 20 | 722  | AACTACTGAATATGTTAGGGAGGAGCATCCAGAGTGGGAGATCAAAAATGGCTTT     | 29152 | A_95_P285208 FG640001     |
| 30028 | 354 | 23 | 835  | GCATCATGACTCTACACCATCCGAATATATTGTTGACTAAAATTTAAAGTGATGG     | 29158 | A_95_P156482 EH614055     |
| 30030 | 354 | 25 | 607  | CAAAGCCAGATATTCAAACCTGTGCATAAACTCAGATTACATCACGGATGGAACCGGG  | 29162 | A_95_P047861 BP131763     |
| 30032 | 354 | 27 | 50   | TTAATTTTTTAAGGGGGAAAAGTCTACTAAGGTAGCTTGTCTATCTGGGCTTTCGCGCG | 29166 | A_95_P112592 CV020749     |
| 30034 | 354 | 29 | 608  | GGAGAGGTGTTTCTTCTTTCGAGTTCAGCGATACTTTAATGCATGTTAACTTTTGAAT  | 29170 | A_95_P001136 FG137226     |
| 30041 | 354 | 36 | 164  | GCAGAGATTGGGAAAATGTTTTGAAGTTTGGATTTTGCCTGATGGTAAGAGTTTTG    | 29183 | A_95_P133322 EB434721     |
| 30045 | 354 | 40 | 668  | CAGACTATGATCCTTAATAGCCCCGTTTACTTATGAGATGCTTCCGAGGTTTTATTG   | 29191 | A_95_P051736 BP132731     |
| 30051 | 354 | 46 | 737  | GGTTATCGTCTGACTAAGCAAGGCAAGAGTGTTTACAACATGGGATGGAAGCAAGT    | 29202 | A_95_P219367 EB425508     |
| 30053 | 354 | 48 | 617  | TAGCTAAAGTACACTGAATTTGTAAATATGCTGACCCCCAGCCTTTAAAATCAGATTA  | 29206 | A_95_P028356 TA13727_4097 |

|       |     |    |      |    |         |         |        |         |         |        |         |        |        |       |              |              |
|-------|-----|----|------|----|---------|---------|--------|---------|---------|--------|---------|--------|--------|-------|--------------|--------------|
| 30056 | 354 | 51 | 209  | TA | ACTATTA | ACTTTT  | GCTATG | TCGCAAG | CAAATCT | TGCCAT | AGGATG  | AGCATT | CCCTT  | 29212 | A_95_P100808 | BP535527     |
| 30058 | 354 | 53 | 475  | A  | ATTATT  | GTCGTT  | TGAGGA | AGTGGG  | AGTCAG  | AGTTT  | AAGCATT | CCAGT  | GCCGAT | 29216 | A_95_P046131 | BP131320     |
| 30059 | 354 | 54 | 878  | C  | GAAAGT  | AATTGG  | TAAACA | AGTCTG  | TGAACA  | AGTTA  | GGTTG   | ACTTGG | AAAAC  | 29218 | A_95_P204282 | TA18032_4097 |
| 30060 | 354 | 55 | 821  | A  | TTGTCT  | TGGTG   | AAATCT | GAAGTT  | GCAGAA  | CTTGT  | TCCCTC  | ATGTG  | ATGGT  | 29220 | A_95_P126727 | EB426077     |
| 30061 | 354 | 56 | 709  | C  | TATAGG  | AACATA  | ATCCTC | TAGGGG  | ACAGTT  | GCTTG  | GAGTTG  | ATCAT  | AGTTGG | 29222 | A_95_P289333 | DV158709     |
| 30062 | 354 | 57 | 257  | A  | TAAAGC  | TAGGTCT | TGGAGT | CGCTGC  | CTTAG   | CATTA  | AAAA    | AGAAT  | C      | 29224 | A_95_P104882 | CV017206     |
| 30064 | 354 | 59 | 464  | C  | AAGAAG  | ATGATG  | TCTAAG | GCTTA   | ATGTC   | ATTA   | ACGGT   | AGGCG  | T      | 29228 | A_95_P022656 | EB432036     |
| 30066 | 354 | 61 | 909  | T  | GAAACC  | AGACG   | ATGTG  | TATTTA  | AGTGG   | TGGA   | AGCG    | AGTCC  | A      | 29232 | A_95_P024166 | TA12892_4097 |
| 30073 | 354 | 68 | 1951 | C  | TGTA    | CTTAT   | CATTTT | CAAGG   | ACTTGG  | GACTGG | TATAC   | CAAA   | A      | 29246 | A_95_P297848 | EF051140     |
| 30076 | 354 | 71 | 767  | T  | TTTCT   | TTTG    | ACATCT | GATG    | CACTAA  | AGA    | AGGTCT  | CAC    | CG     | 29252 | A_95_P227339 | EB678381     |
| 30077 | 354 | 72 | 418  | G  | TTAGG   | TACC    | ACACA  | ATATAT  | TTAG    | TTCA   | AAACT   | AAGA   | A      | 29254 | A_95_P024621 | EH615205     |
| 30079 | 354 | 74 | 430  | T  | AAGCG   | TTTGT   | ATTG   | ATAA    | TTTGG   | ATGCT  | CTAA    | CTG    | T      | 29258 | A_95_P027501 | FG641634     |
| 30080 | 354 | 75 | 686  | G  | TAA     | TTAG    | TCTGA  | ATTTG   | TATG    | CTCA   | ATTTT   | AC     | CT     | 29260 | A_95_P116652 | DV159412     |
| 30081 | 354 | 76 | 128  | G  | AGCT    | TTTT    | GTTA   | ATTG    | ATC     | AGG    | TCTT    | CTCA   | A      | 29262 | A_95_P152132 | EB682439     |
| 30083 | 354 | 78 | 856  | T  | TAAG    | TTTCT   | ATTT   | CCA     | ACG     | CAAT   | GCACA   | ATCT   | T      | 29266 | A_95_P245817 | DW000156     |
| 30084 | 354 | 79 | 853  | G  | GAT     | TTT     | GCAC   | CGAT    | GGTT    | AGAG   | TTT     | AGACA  | A      | 29268 | A_95_P010581 | TA12891_4097 |
| 30086 | 354 | 81 | 513  | T  | TAGG    | GTTAT   | TGGG   | TAA     | CTAG    | GCTT   | ATCT    | G      | G      | 12052 | A_95_P000101 | FG167017     |
| 30094 | 355 | 4  | 1384 | C  | CGCG    | TAGGA   | ATGTT  | CATT    | GTTG    | TTG    | TTA     | A      | A      | 29286 | A_95_P239069 | AB077051     |
| 30099 | 355 | 9  | 427  | T  | GCTT    | CTTT    | TGG    | CTT     | GAA     | ATC    | AGG     | CTG    | A      | 29296 | A_95_P091693 | BP531460     |
| 30106 | 355 | 16 | 270  | A  | AGAA    | AGTAC   | ACAG   | CATGT   | GTTT    | CA     | ACAG    | AG     | G      | 29310 | A_95_P038596 | BP129312     |
| 30109 | 355 | 19 | 707  | A  | AAGG    | CAAG    | AGCTT  | CCG     | GAG     | ACG    | TTTT    | G      | C      | 29316 | A_95_P145527 | EB449275     |
| 30114 | 355 | 24 | 845  | G  | CCACT   | TGAC    | AGTTT  | AAG     | TAC     | CTTT   | GTTTT   | AG     | T      | 29325 | A_95_P016356 | TA15811_4097 |
| 30115 | 355 | 25 | 306  | G  | TAA     | GTCA    | ATCCT  | TTT     | GACT    | ATT    | ACAA    | ATG    | A      | 29327 | A_95_P133097 | EB434257     |
| 30117 | 355 | 27 | 811  | G  | CTCA    | TGA     | ATTC   | TGG     | AGG     | ATTC   | ATTG    | TG     | G      | 29331 | A_95_P234934 | EB424629     |
| 30118 | 355 | 28 | 787  | A  | AATG    | TAGT    | GGTAA  | GCTG    | CTT     | GAA    | ATTT    | T      | G      | 29333 | A_95_P208362 | TA18952_4097 |
| 30120 | 355 | 30 | 652  | A  | TATAG   | G       | TAG    | CAC     | CTT     | AG     | TTG     | AG     | C      | 29337 | A_95_P283313 | FG637159     |
| 30121 | 355 | 31 | 1328 | T  | ATGG    | TCG     | CAGG   | CCCT    | TGAT    | GTT    | ATG     | CTT    | C      | 29339 | A_95_P239224 | AJ608157     |
| 30122 | 355 | 32 | 431  | G  | GACA    | AAAT    | AGGG   | AAAG    | TTGG    | CCAT   | AGACA   | AAAT   | C      | 29341 | A_95_P109622 | EH623214     |
| 30124 | 355 | 34 | 808  | A  | AGAT    | G       | TAG    | TAA     | TCA     | AG     | G       | T      | T      | 29345 | A_95_P196992 | TA16463_4097 |
| 30125 | 355 | 35 | 402  | C  | TTCA    | AGTT    | CTCA   | ATC     | AG      | CAT    | CAAT    | AG     | A      | 29347 | A_95_P095253 | BP533101     |
| 30127 | 355 | 37 | 785  | A  | CTAT    | CTCT    | TGCTT  | CAG     | GTT     | CAG    | GTT     | CAA    | A      | 29351 | A_95_P190912 | EH620499     |
| 30132 | 355 | 42 | 865  | G  | ATGT    | ATAT    | CTGT   | ATCT    | AA      | CCCC   | CTG     | TAG    | A      | 29361 | A_95_P270351 | EB431314     |
| 30135 | 355 | 45 | 746  | A  | GAAC    | GACG    | ATGG   | CATT    | GAT     | GAT    | GA      | AGG    | T      | 29367 | A_95_P151072 | EB451434     |
| 30136 | 355 | 46 | 333  | C  | TCTT    | TCCA    | ATGT   | AGAA    | CAAA    | AGA    | ACCAT   | GAC    | G      | 29369 | A_95_P043026 | BP130505     |



|       |     |    |      |                                                             |       |                           |
|-------|-----|----|------|-------------------------------------------------------------|-------|---------------------------|
| 30137 | 355 | 47 | 1520 | GTAAGTAAACTCATAGCTCTGCGGTGCGCAAATCTGCTTGCTAGTTTATTTCTGAAAA  | 29371 | A_95_P228424 AY429423     |
| 30140 | 355 | 50 | 972  | ACATTCGCGAGCTCGGTTTGAGCTTATTATAATGTTACTTGCCTACGTAGTTTCCCTC  | 29377 | A_95_P008516 TA13284_4097 |
| 30141 | 355 | 51 | 905  | CCATATGTCACAGGGTTGTGGTTCAGTGCTCATTAAATTGATAACTGAGTGTATCATA  | 29379 | A_95_P197882 TA16660_4097 |
| 30143 | 355 | 53 | 405  | GATATGTGGGGTCTTGCCCAATTGCTTTAAAAATCAGTGATAAATGCCTTCTCTTTI   | 29383 | A_95_P089693 BP530609     |
| 30155 | 355 | 65 | 293  | TTGTAAGCAGATGTAGGGAATTGATCTTTAGCAAATACCCGATCTTCAACCTGTGI    | 29407 | A_95_P026126 TA13159_4097 |
| 30157 | 355 | 67 | 742  | TTTCTTCTTACCAATGCAAAAGATTGCTGAAAGAGCAGAAATACAACTATCCTCATG   | 29411 | A_95_P316838 FG196017     |
| 30159 | 355 | 69 | 335  | ATTGGGATATGATACCCTTTGGAATCTCACTCATGGTGGCTGTTGACATTAAGTAGTA  | 29415 | A_95_P111902 CV020422     |
| 30161 | 355 | 71 | 662  | ATAGTGGTGCTTATGATGTCTTTTGGACTGTTTTTGTGTGTGTAAGACCTTTGATC    | 29419 | A_95_P246317 EB430087     |
| 30162 | 355 | 72 | 727  | TGCAGAACTTCTTAGAACAGCTCGATTTGAGCGTTGAGCAATATGATGATAGATTA    | 29421 | A_95_P228219 DW000115     |
| 30167 | 355 | 77 | 546  | AGTCACAAGCCCAGAGAGAAGGTTCTGTCTCATTTTCCATAATATAGCTGCTGAGTGT  | 29431 | A_95_P152517 TA16178_4097 |
| 30169 | 355 | 79 | 1198 | CGAATAATTTTGTGGCTGCTTGCTAAGCATTTCAGATTTGCTGGCAATTTGTATTC    | 29435 | A_95_P182592 TA13254_4097 |
| 30172 | 355 | 82 | 813  | AGAGGAGAAATAGCAGCCAAATGATGCCTTACACTAAACATCACCTTGTATTGTTA    | 29441 | A_95_P152577 EB682912     |
| 30174 | 355 | 84 | 377  | ATGTCTGGTCTTGTGTGACTGATGGAATTATCCTGCTTCTAAGCCCTATATTTGATC   | 29445 | A_95_P186652 BP534468     |
| 30180 | 356 | 5  | 220  | TGTTGTATGTGGATTGATCATTCTAGTCCAACCTGTCACTAAAGAAACTATCCTTCA   | 29289 | A_95_P098033 BP534304     |
| 30181 | 356 | 6  | 882  | GTTTTACAGGAGGTATTGCAGTATTCTGGAGTTAGTCTGGTACAATCTGGATTG      | 29291 | A_95_P305858 S44869       |
| 30183 | 356 | 8  | 232  | TGCATAATACACTTTTCAAGTATTTCCACATCTGGTTTCTTGCCGGAGCTGTCTTTT   | 29295 | A_95_P131807 EB432218     |
| 30195 | 356 | 20 | 316  | ATACAGACCCATACTAAAACAGATGATTGGTCTCAAGCGGTGATGTCCTATGTAG     | 29318 | A_95_P111352 CV020163     |
| 30196 | 356 | 21 | 1192 | TGCGTTTAGAATGTTACAATGTACGTGTAATGTTAAGTGGAGTTGCTGCATAGCAGT   | 29320 | A_95_P206137 TA18442_4097 |
| 30197 | 356 | 22 | 824  | AATTTGATATCGCCTGGGTCAGCCATTTCTGTATCTGGAACCTCATCTCCGTTTCTGA  | 29322 | A_95_P193542 TA15695_4097 |
| 30199 | 356 | 24 | 646  | TGTTCCGTATAATTTCCAGTTTGGCAACGGGCGAAATGTCTGTAATTAATTTATAAG   | 29326 | A_95_P000646 TA12585_4097 |
| 30202 | 356 | 27 | 1006 | GTGTGTCCTTTGTTTTGATTTGCTTTATGTATTAACTACTGAATGATCCAGTTAGGGAC | 29332 | A_95_P016981 U64923       |
| 30204 | 356 | 29 | 305  | AAATGTTTTATGGTTGCAGCAAGGGAGCTTGTATTTCTGGGGGTGGATACACCAC     | 29336 | A_95_P108487 CV018856     |
| 30205 | 356 | 30 | 216  | AATTCGTCGTTCAAATGCTTAGAGCCAAAAGGTGATGAACCCGGTTTGTGACAGA     | 29338 | A_95_P034903 BJ999158     |
| 30210 | 356 | 35 | 1672 | GAAGGAACCTTATGACTATACCTTATATTATGGCTCTATATAACGCCTGGCTGTTTTT  | 29348 | A_95_P239944 Z29492       |
| 30214 | 356 | 39 | 804  | GTTCATATCCTCACTGTACCTCTTGTTAATTGTGCGAATGGATAATCTTTGTTCTGT   | 29356 | A_95_P149057 EB678711     |
| 30216 | 356 | 41 | 848  | ATATGGGTGATGTTCTTATCGAGGGTAAAGCTACTGGTTACTGTGAAAGTGGGTGCT   | 29360 | A_95_P244397 EB447451     |
| 30217 | 356 | 42 | 856  | GCTTCCACCTCATCCCATTGTGTTTCATATTGAAGTATGGTTTGAATAATTTGCTTAGA | 29362 | A_95_P201722 TA17484_4097 |
| 30220 | 356 | 45 | 806  | GTGCAGATATTGTGTCAGAGAATGTTGGATGAAGAAGTTTGTGCATATATTCAGTC    | 29368 | A_95_P223217 TA22202_4097 |
| 30222 | 356 | 47 | 727  | TAAATCTGGATCAGTAGTGAAGCTGCCAAACGTGAAGAAAACTGTGGGAGAGC       | 29372 | A_95_P013926 EB428701     |
| 30228 | 356 | 53 | 817  | TTTAGTCAGTGGTCTTCTTCTTTAGACTAATAGTACTGCTGGTTTGTGACTCTAT     | 29384 | A_95_P230614 EB425998     |
| 30231 | 356 | 56 | 637  | GGAGATCAGACTTTCTTTGAGTAATTGCATGCTTCATACATCACTTTGCTATACGTAA  | 29390 | A_95_P231864 DW002537     |
| 30232 | 356 | 57 | 159  | CCGTGATGTGAAGCCCCATAATGTAATGATTGATCATGAGCAGCGTAAACTTCGGTT   | 29392 | A_95_P128227 DV999924     |
| 30235 | 356 | 60 | 143  | AAGGACCTCTGTTTTCTCCATTAATAATGCATCAAATTACAGCCTCAAACCACCAACTI | 29398 | A_95_P123607 FG622782     |
| 30236 | 356 | 61 | 0    | TGTGTCCTATGGTGGGGAAAATGGATTCAATCAGCCTATGACTTATCTCTGCTGAGAT  | 29400 | A_95_P226989 A_95_P226989 |

|       |     |    |      |                                                              |       |                           |
|-------|-----|----|------|--------------------------------------------------------------|-------|---------------------------|
| 30240 | 356 | 65 | 711  | GTTTTCTTGATAAAAAGGAAGCCCGCTACAACCCAAAGATGTCACCCTATATACCAAT   | 29408 | A_95_P120567 DV161110     |
| 30244 | 356 | 69 | 685  | GGAAGAGAGAATAGTAGAGTACCTTCTGTATCTTAGAATCAGTTAACTCATGATTC     | 29416 | A_95_P014736 EB435352     |
| 30254 | 356 | 79 | 867  | AGAATGGGACCAGTGTGATGCTCTGGAAGACTTTCTAGCTATGGTCTCCTTACTGAT/   | 29436 | A_95_P297898 FG148963     |
| 30255 | 356 | 80 | 657  | TGAAAAACACTTCATGATGTCCGCAATCCACAAATCAGGAGAAGGTTCCCCACTCTT    | 29438 | A_95_P065580 BP136369     |
| 30256 | 356 | 81 | 642  | GTTATGGATTCTGTTATATTTCCAGCACAAACATTGTGCATGCGAATACAATTAATG    | 29440 | A_95_P018671 TA13080_4097 |
| 30258 | 356 | 83 | 836  | CACCAAAAATCACATGCTGTATGAACGAAATCAGGAAACAAACAGATTGGAATACTT    | 29444 | A_95_P118307 DV161323     |
| 30260 | 356 | 85 | 1051 | TGGACATGTTTGGATATTTAACGCATGTAGGCATGCCACATTAATAAGATTGAGACG    | 29448 | A_95_P204822 TA18149_4097 |
| 30265 | 357 | 5  | 809  | TCATGGCTACTCAGTTTCAAGATGGAGAGCGTTTTAATCTCAAGTGATAAAAACATAT   | 29457 | A_95_P269786 EB426716     |
| 30267 | 357 | 7  | 349  | AAGAAGCAAGTTTGTTCCTACATGAAGAAATATATCAATAGCCTTACACCCAAAGT     | 29461 | A_95_P110392 CV019713     |
| 30268 | 357 | 8  | 419  | CAAAAGATAAAAACGGCATGGTGCCTTACCATTGTAAGTGTGAAACTCTGATCTTTC/   | 29463 | A_95_P100573 BP535433     |
| 30271 | 357 | 11 | 390  | CGTTTGACATTTAAAGTTTCAGGACATTAATTGATGGAAGAGCTTAGAGGGACGAA     | 29469 | A_95_P123117 DW003019     |
| 30274 | 357 | 14 | 698  | TATTGATGTTTTGGACAAGCAATTGCTTGAGGGTATGGGTGTGCTCCTGACAGAGGA    | 29474 | A_95_P136692 EB440460     |
| 30290 | 357 | 30 | 323  | GGACATGTACAACCTCATTCCACCAGTGTGATTATGAATGTCAAATTATCATACACT    | 29505 | A_95_P143822 EB447010     |
| 30294 | 357 | 34 | 1128 | CCAGTAAGTTTTGTGCTATATTCATTTGGTACAACACCTTTTGTGATACATTTTTGGG   | 29513 | A_95_P008826 TC44547      |
| 30295 | 357 | 35 | 830  | GCATATGATCTGGAGTGCCTTGAAACAGTTTTATCTGTTTACTGTGTTGTGGATTCT    | 29515 | A_95_P160202 EB424704     |
| 30298 | 357 | 38 | 464  | CTGCCTGTACTTAACTTATATGAACCAATGCATATCATGCAACGTA AAAACATTCTTC  | 29521 | A_95_P021816 TA17940_4097 |
| 30299 | 357 | 39 | 833  | TGCTAATCAATTGCGATACCCAAACAATCACACACATTACTTCTCCTTTATTCTGCTCT/ | 29523 | A_95_P289808 DV161043     |
| 30302 | 357 | 42 | 1203 | GATGGCCTAAAGCTCAAATTACTGTGAATAGTCGTGTTTCATTTTCGCTTTGGAATTT/  | 29528 | A_95_P011041 TA15689_4097 |
| 30305 | 357 | 45 | 1035 | AACGATGAAAATGACATCACTGTGCATCCTACAACCAAAATTTAATTGGTGTGGATT    | 29534 | A_95_P011186 TA15797_4097 |
| 30307 | 357 | 47 | 1319 | GCGAGGAGGCTTGTCCCTCTGTCTCTGTTTGTGAATAATAAAGTTTAATTATTGTT     | 29538 | A_95_P014336 TA11987_4097 |
| 30309 | 357 | 49 | 2097 | AGTAAATAGTTACTACTAACCAATGCAACTTATGAGATGGATAACTAGTTGTGTCATC   | 29542 | A_95_P014056 TA12496_4097 |
| 30315 | 357 | 55 | 573  | ATTTCATTTTCGTGGATGCTGACAAGGACAATTACATCAACTACCACAAGAGGATAA    | 29552 | A_95_P005049 Z56282       |
| 30325 | 357 | 65 | 307  | TTTTGTGGGATTACTGTTAAATGATGTGTGCAAAGAAAGTGGGGGGAGCTTCTCCCGT   | 29572 | A_95_P095033 BP532985     |
| 30328 | 357 | 68 | 173  | CAATGATGGCTACTGGGACTATAACTTCTATTTGGAGGTGCAGGTGGAGGAGAAC/     | 29578 | A_95_P241325 AJ718261     |
| 30330 | 357 | 70 | 621  | TTCTTGCTATTGGAGGAATAGTTTGGCTTCTCGAAGATGGGAAATGGTTGTGAAATC    | 29582 | A_95_P004921 EH665313     |
| 30333 | 357 | 73 | 440  | TGACTTCTGATCTTGAGAAGCTGGTATTATCATTGTTTATACTCCTGCATATTCTA     | 29588 | A_95_P025706 TA14429_4097 |
| 30337 | 357 | 77 | 388  | CAAGCAAAACTGCAGACAACAAGCCAATTGGGATTTGAATGCTGCATTTCTTTGGG     | 29596 | A_95_P081905 BP528381     |
| 30338 | 357 | 78 | 821  | GTTAAGAATCGCGCTACAAGTTCTCCTAGTGAGGGCAGTTAACACTATCATAATTGCC   | 29598 | A_95_P147427 EB451837     |
| 30341 | 357 | 81 | 443  | TATTATCCTTGCTTAACCCAAGTTGATATCACAAGCTTGGGAGATTGCTGGCACACC    | 29604 | A_95_P070665 EB425904     |
| 30345 | 357 | 85 | 837  | TGCATCCATTTGTTTCTTTTCAGAACTGTCTACGACTATATGTTGTTGCTGAATAGA    | 29612 | A_95_P218267 DV999170     |
| 30349 | 358 | 4  | 448  | TTTGTCCCTGAGCGGACATGATAGATAGTTAGAATACCATGTACTTTATTTTGTTT     | 29456 | A_95_P218272 TA21134_4097 |
| 30351 | 358 | 6  | 837  | TGTTGGTGTGTTGCTAATACTCAGGGTCGATGTGGTTAAGGTTAGAGAGCCATGCG     | 29460 | A_95_P211322 TA19585_4097 |
| 30352 | 358 | 7  | 1600 | TTTGTCCCTCTCAATGGAACCTTGCAGTTTCTGGTCTTCCCTGTTTCTTGTGACTA     | 29462 | A_95_P014556 TA15184_4097 |
| 30357 | 358 | 12 | 93   | TTCTAGGATAGTAAACCTTTTGGACTTTGGTCGCTGTATTCTGTATCTGGATTCTCTGC  | 29471 | A_95_P112372 CV020645     |

|       |     |    |      |                                                              |       |                           |
|-------|-----|----|------|--------------------------------------------------------------|-------|---------------------------|
| 30359 | 358 | 14 | 549  | CTAGATGAGCTGTCTAAGGTGGTTCATTTACCGTGGTAAAATATTGAATGAACCCAT/   | 29475 | A_95_P181037 EH623214     |
| 30362 | 358 | 17 | 399  | ACACTATGGTTGAGTCATGTGGAAAGCTCAAATTTAAAAACAAGATCTTGTGCAACAT   | 29480 | A_95_P198922 TA16883_4097 |
| 30364 | 358 | 19 | 623  | GGTGCTTGACCGGTTATAGTGTTCGTGTTTTAGATGTATTTTAACCATTAAATCAC     | 29484 | A_95_P104557 TA11779_4097 |
| 30368 | 358 | 23 | 1288 | TGACTAATGGTTGTGATCATCTGTCACTGCTATACTATAGTTTCATCGTGTCAACGTAI  | 29492 | A_95_P200052 TA17126_4097 |
| 30371 | 358 | 26 | 489  | GTTTGTTCATCCGTTTTCTGAATGTTAATAGACTATTTTCGATCATAGATATTGCCCTTC | 29498 | A_95_P190677 TA15066_4097 |
| 30372 | 358 | 27 | 698  | CCGGGAGGAATGACCTTTTTGCATTTCTTCTTGTGAATCACAGATCTTTAACTATCTATT | 29500 | A_95_P122352 DW002352     |
| 30374 | 358 | 29 | 193  | ATAAATTGTACCTGAAGAAGCAGTTATACGCCCTACACATGGGTGAAAGTACGATTT    | 29504 | A_95_P242577 DQ460190     |
| 30376 | 358 | 31 | 514  | TGACATCAGAACTTTGTTTAAACGCATCTTCAGAATGTCCAGGAGGCGAGTGAGGAC    | 29508 | A_95_P041331 BP130064     |
| 30377 | 358 | 32 | 691  | TGGATTCTGCAATGTGAAAATTAGGGCAGATAGAAGCGAACACTTCCAACATCTTAT    | 29510 | A_95_P050781 DV162700     |
| 30379 | 358 | 34 | 638  | TTCAATCTCATTTCCGCTCCTTCTACTTGAGCCAATTGGCCAGAAATGAAAAAGAAAA   | 29514 | A_95_P253304 FG168935     |
| 30380 | 358 | 35 | 483  | GACTATTCTGTAATGAGGATGAGGTGCGTGATATTTCTTTATATTTCGATTTTCGAGTCT | 29516 | A_95_P219677 TA21445_4097 |
| 30381 | 358 | 36 | 552  | TGTTTTGCTATAAATTGGATCCATTTCTGCTTTTCGATGAACCAATGGCAAAGCTCAG   | 29518 | A_95_P123822 FG639427     |
| 30383 | 358 | 38 | 293  | CTTTATTAAACTCGTTTTATAACTACGTGGAGTTGCTTGGACTTCTTTCTCCCTTAA    | 29522 | A_95_P180997 TA12872_4097 |
| 30391 | 358 | 46 | 691  | AAATGCATATTGGACCATGGCGAAAAGCAAAAATACATGCAAGCTAAGTGGCTAAAA    | 29537 | A_95_P280288 FG195840     |
| 30402 | 358 | 57 | 986  | GGCATAGTTATTGCTTCAGCATATACATGTCTTAGAACTACACATCACATTTGATCA    | 29557 | A_95_P190702 TA15072_4097 |
| 30403 | 358 | 58 | 842  | CTAAAAGATCGATCATGGTCGTGAATATATGTTGGACCAATATAATGTGTCTTGAAC    | 29559 | A_95_P195857 EB440123     |
| 30404 | 358 | 59 | 803  | ATAACTGATGGCATCATAGTCTGTTACAAACTCAGTAATGCAATAAACTCTTGTTG     | 29561 | A_95_P011606 EB437936     |
| 30407 | 358 | 62 | 389  | GCCAACCAAGGAACCTATAAGTCATAACAAACAACCTGCAGAACAAGTTGTATTTCT/   | 29567 | A_95_P124892 DW004693     |
| 30409 | 358 | 64 | 763  | GGGAAAGAGAACTCCTTATTTCCCAATAAATGTACATTGTTAGGTGAATTTCATAGT    | 29571 | A_95_P242892 DV999620     |
| 30412 | 358 | 67 | 110  | CCCAATTGCAGTTGTTATTTTACAGTGATAGTATTGGTAACTACTGTTTCCATGTCA    | 29577 | A_95_P001276 EH623494     |
| 30413 | 358 | 68 | 818  | CCTTGTAAGCAGTTGCAGTTGAAAGAGGTGTATCATTCTGGTAAACTAATTTTGTAGT   | 29579 | A_95_P244217 EB678794     |
| 30414 | 358 | 69 | 856  | GACTGTTAACTAGCATTCTGTGGAACATGAACTTAAAGATGATGTGATTATGAGTC     | 29581 | A_95_P013316 EB677804     |
| 30415 | 358 | 70 | 787  | GGCTTGCATCTTGCAACAATGAGCTTGGATCTAGCTGTTCTAGTATAGTAATATTATT   | 29583 | A_95_P244687 DV999471     |
| 30416 | 358 | 71 | 1105 | CAGTCAGCGCAAGCTGCAAAATCGAATTGTTGTGATATCCAACATTAATAAATAAAA    | 29585 | A_95_P188977 AB044154     |
| 30422 | 358 | 77 | 510  | AGGTTCCGTTTCGCAATTTTGGTACTTCAGTCCAAGGATTGTTGCTTTGTATAGCCCG   | 29597 | A_95_P122082 DW002135     |
| 30424 | 358 | 79 | 375  | GTTGAGTGTCAATTGCTTATTGCATCAAATTAGGATAGAGGCCTCGGCAGGATGATGA   | 29601 | A_95_P266426 BP533599     |
| 30426 | 358 | 81 | 1655 | GAATGGACTCAAGATTAGTTGCATGTGCTGAAGATCATTTTCTCTTTTTTCTTTTC     | 29605 | A_95_P007826 TA11819_4097 |
| 30427 | 358 | 82 | 407  | TTACACGATGATGATGATGAAAAGTATGTTCAAACCTTTGCCAGTGGGCTATGTAAGG   | 29607 | A_95_P093138 BP532157     |
| 30428 | 358 | 83 | 316  | TCGATTTGAAAACCAAATCAGTTGAGAAAGAAAAGCCAAAGCAGAAGATGGACCAG     | 29609 | A_95_P004621 FG642543     |
| 30429 | 358 | 84 | 552  | CTAATTTTAGATATCCTTTGGCTCGGCTCCTCTACCACTTCAACTGGGAGCTTCCATAT  | 29611 | A_95_P211327 TA19586_4097 |
| 30434 | 359 | 4  | 762  | CAGATTGTGTTTCTAAAATGGAACGGAATGGAATGGAGGAGTTTGGATTGTTTCGT     | 29620 | A_95_P290523 EB678291     |
| 30435 | 359 | 5  | 902  | TCTTTTTGTTTTATTATACTTCTCGATTCTGTTGATTGCAGCGGCCCCCGCCGTAA     | 29622 | A_95_P009091 TC40703      |
| 30438 | 359 | 8  | 342  | TTGGTAAAAGGTTGTTCTGTTTTGATGAAGCAAAGCCAGACCATTTCACAGTAAGC/    | 29628 | A_95_P094468 BP532732     |
| 30442 | 359 | 12 | 339  | GAGAGAGAGTGTGTGCTTGATTTGTTAGTGATTTAGAACTTTATTTATGATCGGTTI    | 29635 | A_95_P005766 TA12138_4097 |

|       |     |    |      |                                                              |       |              |              |
|-------|-----|----|------|--------------------------------------------------------------|-------|--------------|--------------|
| 30445 | 359 | 15 | 759  | TAGAAATGGTTCAGGACGATATTCTTCAGCAAGAAGGTCAGAGGCGATCACCTGTTA    | 29641 | A_95_P149407 | EB679258     |
| 30453 | 359 | 23 | 835  | CTGGAGTTGGTTGATTATATCATCTCTTTTGCTGGGTTTAGCATCTGGCGTTTGAATG   | 29657 | A_95_P194382 | TA15879_4097 |
| 30455 | 359 | 25 | 145  | GCTGCCTTTCTGAGTCGTTCTGCAGCTACTAGTATCTCTCCTTGTATTTTCTATTCTGTC | 29661 | A_95_P001876 | AJ719160     |
| 30461 | 359 | 31 | 489  | TTTCCTACCAATAACTACCGTGTCAAAATGGTGCCGATTTTCTTGAATTTATAACCTA   | 29672 | A_95_P095223 | BP533084     |
| 30465 | 359 | 35 | 505  | TCAGCTTCCCTGTGTGTAATGATGATGAATACATCATGTTGAACACTGGATACATAA    | 29679 | A_95_P037208 | BP128945     |
| 30472 | 359 | 42 | 812  | ATATACCAGTACTAGTTCCTGTTGTGAATCATTGTTCTTGTCCCCTCCCTTTGCCTCT   | 29693 | A_95_P230554 | DV158143     |
| 30474 | 359 | 44 | 734  | ATGTGTTTGGAGCCAGTTCGTTGTGAACAGCTTACATATCTGGTGTTCCTGTGTTTTA   | 29697 | A_95_P203092 | TA17780_4097 |
| 30475 | 359 | 45 | 387  | GGCTAACAGAAGCAAGGTTAATGTTTAGTTTGCAGTGAATAGATGTCTATGTAAATC    | 29699 | A_95_P158952 | EH616837     |
| 30478 | 359 | 48 | 320  | GGAATTTGAGAACATAAATAGAGGAGAAGCTTCCATCTTTCCTTTTGTCTGTTGTTT    | 29705 | A_95_P067105 | BP136774     |
| 30479 | 359 | 49 | 369  | TCCCCGTTTCAATTTATGTTAAACCTATTTCTTTTGTAGTCCGTGCCAAAAATAATGA   | 29707 | A_95_P160542 | EH619217     |
| 30480 | 359 | 50 | 873  | TTTGGTTACATGGCTTGCATATGCTACGCCTTCTTCTCATGCTCGGAACTGTTGGTTT   | 29709 | A_95_P268781 | EB438068     |
| 30484 | 359 | 54 | 805  | CAGGGTTTGTGGCTACGATGGAGCTTAAAGCAGCATGATTGATTTGAGTTGATAT      | 29717 | A_95_P225597 | FG144747     |
| 30485 | 359 | 55 | 948  | GGAATAATCTGTTTCTTGTTCCTTGCTCCAATCTTCTGATATATCAGGCCAATTTTCT   | 29719 | A_95_P208232 | TA18923_4097 |
| 30488 | 359 | 58 | 274  | TTGCAGTCTAGCTGGTTTGGTTTACAAGTGTGATTGTATCTGGTTTGGAGCATCCTTGT  | 29724 | A_95_P095003 | BP532974     |
| 30490 | 359 | 60 | 752  | TATCTGCCTAATACTGACAACCTGATGATGGGCGTATTTGTGTATGTTTGTATTTATC   | 29728 | A_95_P123027 | DW002919     |
| 30492 | 359 | 62 | 1551 | CCTGCTGATGCCAAACCAGCCACCACAATGGGCGGTTTCCATTGAACAATATTAATA/   | 29732 | A_95_P010036 | X82276       |
| 30495 | 359 | 65 | 98   | TGTATATTAACAGATTGTGATTCTACTGAGGTCCTTTAAAGCTATAAACTCCTGGTTG   | 29738 | A_95_P112907 | CV020921     |
| 30500 | 359 | 70 | 350  | GTTTTGCTCGCTTTTGGTGTACTCGTTAAGTTTATCAATGCCCAAACAAAAAGTTG     | 29748 | A_95_P025161 | FS415057     |
| 30503 | 359 | 73 | 804  | CTCTTTGGTTCAATAAAACAGCAGTGACTGTAAACATGCAATTTTATTCTCTGTCCA    | 29754 | A_95_P008316 | EB449250     |
| 30504 | 359 | 74 | 845  | CAACAAAGAGCTGAGCCAAATGAGGAGCCTCTGCGGCAATATATACTCTTGTATGTC    | 29756 | A_95_P121332 | DW001341     |
| 30505 | 359 | 75 | 338  | GCTTTTTCTCGATGAAGTGCTTTAGCATTGCTTTATGCGTTTTGCTGAATTTACTGTTT  | 29758 | A_95_P128767 | EB428497     |
| 30506 | 359 | 76 | 753  | TAAATTGTGTGAGAGTCTGCAGTTGGATTGCCCCAGATGGCCTAAAACCTTTCTTTGT   | 29760 | A_95_P178137 | TA12160_4097 |
| 30513 | 359 | 83 | 506  | AGATCGGCTCCACTTTTTTGGTGCTAGTTATATGGTATGGGATATTTAGTGAACGTG    | 29774 | A_95_P122107 | DW002148     |
| 30514 | 359 | 84 | 792  | TAGGTATCTGTTTTTGGTGAATTAGTATGATTACCTGTTGGTGATAGGGGTTCTTTT    | 29776 | A_95_P033404 | EB678137     |
| 30515 | 359 | 85 | 667  | GCAATTCAATTACTTCAGTAATTGTAAGCAACTGCAAGTACCAAAGTTTCTCTGATTT   | 29778 | A_95_P214487 | TA20273_4097 |
| 30516 | 360 | 1  | 829  | TCCAAAAAGGAGTTGGTCCACGAAGCCTTTCAGGGGTTAAACTTGAATTTACCTCC     | 29615 | A_95_P227194 | EB680094     |
| 30519 | 360 | 4  | 416  | AAGGACCAAGTTGAGAAAAGACAGGTATCTATTTAAACGCAGAGATGAGCCTGGTAA    | 29621 | A_95_P071520 | BP525721     |
| 30523 | 360 | 8  | 495  | GCTGTAAAACCTTGGTTATGGAACAATGGAATAAGGATGTTTTGTGTAGGTTGTGT     | 29629 | A_95_P293248 | EB432042     |
| 30524 | 360 | 9  | 539  | GGTGTATTTTGGTGTATGAACAATAGAAGTTTTCTTGCACCTTTTGAACCTTTAACAG   | 29631 | A_95_P125262 | DW005056     |
| 30526 | 360 | 11 | 1014 | CCCTATTTATGTAATCCGTACAGCGAAATTAGTGCTGAATCATTGATTGTTGTATGAA   | 29634 | A_95_P015061 | TA17772_4097 |
| 30531 | 360 | 16 | 295  | TTAGAAGAAGAGGGAGAGAGGAGGATGACGACTTTCGGACAATAGCAGAGGGTTA      | 29644 | A_95_P058366 | BP134458     |
| 30532 | 360 | 17 | 757  | ATTTGGACTCGATGCTTTGATTCCGAGCACATCAAAAATAGACGACAATCAAAGGGG    | 29646 | A_95_P263411 | FG147854     |
| 30535 | 360 | 20 | 838  | AGGATTACATTTACATTTCTGTAATAAACTCATCCGCAATATCGCTCTTGTGTAGC     | 29652 | A_95_P206387 | TA18505_4097 |
| 30537 | 360 | 22 | 350  | CAGTTGTTGCGTATGCTCGTCATTATGGATAGCGTCTTTGTGCGAAAAGGGCTGAT     | 29656 | A_95_P112822 | EB680056     |

|       |     |    |      |                                                             |       |                           |
|-------|-----|----|------|-------------------------------------------------------------|-------|---------------------------|
| 30538 | 360 | 23 | 333  | AAGATTCAGGTATGTATATGGCTTATCGGAGGGAGAGTCATCACGAGTTTAGCAAGC   | 29658 | A_95_P103867 CV016724     |
| 30540 | 360 | 25 | 488  | AGTGGTGTAGCTCAACAATGTTTCTTTGCTTATTGAACAATGTATGTCTATGGCAGA   | 29662 | A_95_P001891 TA15786_4097 |
| 30541 | 360 | 26 | 919  | GCCACAATAAATCTACGCCAACTCCTTTCCACTTCAATAATTTTTAAGTCCATCCAATT | 29664 | A_95_P178242 TA12192_4097 |
| 30542 | 360 | 27 | 765  | TGCAGACAGTCATACCAACTGGTAGCTGCAGTTCGTGATTTAGTTCCTATCCATCA    | 29666 | A_95_P193662 EB433922     |
| 30546 | 360 | 31 | 364  | TTTTAGATGGATATGCGCATTCTTCTTCTGGGTTTGGCTTGTGGTCTCGCTGGCCTTT  | 29673 | A_95_P102882 CV016246     |
| 30549 | 360 | 34 | 259  | AAGATGCACGGTGTGGATGCATCAAGCTGTCAAGGTTGTGCATATTGTTGCACACTT   | 29678 | A_95_P107527 CV018424     |
| 30552 | 360 | 37 | 691  | CGCCTTGAATAGGGGAAACTTGTAAATATGTCTTATGAGATTTATTTTGGTGTCTTA   | 29684 | A_95_P195832 DV998762     |
| 30555 | 360 | 40 | 473  | AGGGATCCTGTATAGAGCATTATCGTTAGAGAGCATAAATACTATTCTTTACCCTAGG  | 29690 | A_95_P047491 BP131668     |
| 30556 | 360 | 41 | 626  | AAAGAGGGTAGTCCTCAACATAGGGAAAGCATACACTTTTTCTGATGTCCTTGAAAT   | 29692 | A_95_P265361 EB431914     |
| 30559 | 360 | 44 | 862  | GCAGCTTACTTCTGGAGTAGATAGTTCAGCCAGTTGCTTGGAGCAGCAAATAACATG   | 29698 | A_95_P258436 EB449748     |
| 30560 | 360 | 45 | 920  | CACATTCGCGAGCTCGGTTTGAGCTTATTATAATGTTACTTGCTAGATATTCGATAA   | 29700 | A_95_P182712 L16787       |
| 30563 | 360 | 48 | 648  | AAGGGATTTGTTTGTCTCAAGTTGCTGCGAGAATTTTCTTGGTCACTATAGTGACA    | 29706 | A_95_P117457 DV160365     |
| 30566 | 360 | 51 | 763  | TATGTTTGGCAACATTCTATGATGATCTGTGGTATCGATGGTGGGCGTGATTTCCAG   | 29712 | A_95_P292888 FG170823     |
| 30567 | 360 | 52 | 801  | CAATGTGCTCAGGAGCGTGCTATCAATTACCTCTTGACTCATGTTGATAAAAGTTCTC  | 29714 | A_95_P163287 EH622295     |
| 30573 | 360 | 58 | 143  | GATACGCTGGTTAAACTTACCAAAGTGCCAGGTACGACGTAATTTTTCCCTTGGATAA  | 29725 | A_95_P155172 EG649931     |
| 30576 | 360 | 61 | 532  | CGTGTTCCTCAAATTTGTCAATTTCTGTTCTATTCGTTCAAATGATTAAGAATGCCTTG | 29731 | A_95_P046016 BP131286     |
| 30578 | 360 | 63 | 714  | TTGGGAAAAGAATAAAACGTGTCTCGGTCTTTCGCTGCTGATGACTCCTCAGAGTAG   | 29735 | A_95_P304868 FG151110     |
| 30583 | 360 | 68 | 463  | TTTGTAGATTTAAGCTCCTGTATGGGGCTATCATGACTAAAGCTGATAAACATATGC   | 29745 | A_95_P188007 TA14475_4097 |
| 30584 | 360 | 69 | 838  | TTTGTGGGTTTGGAGATGTTTGATGTCCATTTTCGAGACGTAGGAAAGCTCAGTAA    | 29747 | A_95_P287533 FG134245     |
| 30587 | 360 | 72 | 142  | AGAGGCTCTAGCTGTGAATGACAATTGAATGTGTGAATGAACTTCTTTCACATTGAC   | 29753 | A_95_P211932 TA19722_4097 |
| 30588 | 360 | 73 | 651  | CTGGCTAACAGTTATGCGCGTATATAAGGAAACACTTTGCCATGTAAGCCTTTTGT    | 29755 | A_95_P122312 DW002316     |
| 30589 | 360 | 74 | 307  | AACGTGGGATTGATCTTCACTAGAGGAGACCTGAAAAAGAAAGTCAGCGATGAAGT    | 29757 | A_95_P147767 EB643445     |
| 30590 | 360 | 75 | 344  | CAATTCATTAAGGCTAGTCTTCACTGTGGCTGAACATTATGTAATGAAAATCAAC     | 29759 | A_95_P134712 EB437390     |
| 30591 | 360 | 76 | 715  | ACTGGTATTTTCTTAAACATTTGATTTTAAACCTACCACAATTGTGGGGACCTTGATT  | 29761 | A_95_P238369 AB050843     |
| 30594 | 360 | 79 | 728  | CTGGCGATTGTTTTAATGTAATTTACCCTCTCTCCCCTTGATTGTAATGTAATAA     | 29767 | A_95_P191542 TA15260_4097 |
| 30597 | 360 | 82 | 719  | GGTTTGTGAGGTAAGACAGAAGCTGGATTTGGTAGCAGAAGTGATTTATGAATGTC    | 29773 | A_95_P023836 TA12646_4097 |
| 30598 | 360 | 83 | 647  | GTTGATCCAGAAAAGTTAGTGAGTGACGTGTACAAGAGAACCAGGGAAGCAAGCTAT   | 29775 | A_95_P016686 DW000017     |
| 30604 | 361 | 4  | 306  | GTCTTCCCCTAAAATTTACTAGGCTTTTGGATGTATGAATTGGTTCTAACCTTTTGGTC | 29786 | A_95_P094193 BP532595     |
| 30614 | 361 | 14 | 621  | AGTTCTGACTGTTTCTGGTCTGTGATTTCCATTTGCTTTAAAATAGGTATTTCTGCC   | 29806 | A_95_P202387 TA17622_4097 |
| 30615 | 361 | 15 | 908  | CTCATGGATTGTTAGATACTTGGATTTTCTTCTGAACTTCGAAAAGCATTTTCTTTCT  | 29808 | A_95_P225487 L29276       |
| 30616 | 361 | 16 | 665  | GTACAAAGTGTCTTGATAACCTTCAATGTCTGAGTCAAAAACAGCAGCCATATCACCC  | 29810 | A_95_P316643 FG194661     |
| 30617 | 361 | 17 | 1274 | TTCCTTCAATGTAATCTTCTAATCTTGAATTTGTGGCTAATGGATGGTGGATGATGTA  | 29812 | A_95_P309153 TC64979      |
| 30626 | 361 | 26 | 504  | TGAAGATGATCCAGATCTGATGCAATTTAGACTCTGATTAATAAATGGAGTAGGTTTG  | 29830 | A_95_P124957 DW004733     |
| 30630 | 361 | 30 | 1109 | GAGTTTTGGCATGGATTGCTTTCGTTTCTTCTTTGCTTGTATAGCTAATAAA        | 29838 | A_95_P184207 TA13640_4097 |

|       |     |    |      |                                                              |       |                           |
|-------|-----|----|------|--------------------------------------------------------------|-------|---------------------------|
| 30631 | 361 | 31 | 572  | TTTGGCAAAAGTAACAACCTTTTGGCTTCTGTATTTGAGCTCTCTTAAGATGTAATCTT  | 29840 | A_95_P018466 EH620543     |
| 30636 | 361 | 36 | 777  | TTCTGTTGGAACCTCAAATGTCCATATCTGTAGAATGTACTCGAGAACTAGTTGTGCTG  | 29850 | A_95_P226319 EB438727     |
| 30638 | 361 | 38 | 631  | GACGCCTATGGCGTCTTTCATTCATGCTATTTGACATTCATTTGTGTGATTTAAGTTTA  | 29854 | A_95_P117807 DV160765     |
| 30640 | 361 | 40 | 859  | GCCTGCTTGTTTTACTCGTTCATATACAGTCAAATCTCTAATATCTGTATAACAGTCTT  | 29858 | A_95_P182957 TA13344_4097 |
| 30641 | 361 | 41 | 468  | TAAATAAATGCGCTCCACTGTCAGCTTGGAACTGTACCCTTCTCTGGGTTTCTTACATT  | 29860 | A_95_P072505 BP525980     |
| 30642 | 361 | 42 | 680  | TTTCCAATTTTCTTTTGGTGACAGGTTATAGTATTGCTGCATACTGCTGATCTGCAAAT  | 29862 | A_95_P000836 EH622594     |
| 30644 | 361 | 44 | 810  | GAAAGCGCACAAATGGTTGGTTGAGTTCCAAGTCTACAATTCACATTGAGTGCAAAT    | 29866 | A_95_P126607 EB425927     |
| 30645 | 361 | 45 | 577  | GAGTATAGGATTGGAGGGGCATATTAGTCACTTTAATACAAGTTGTAATAGTCTTGT    | 29868 | A_95_P022131 EB434942     |
| 30649 | 361 | 49 | 710  | GTGTATTGGGTATATTCAGGATTATATCAATGCTTGGGGGTGTAATGGATAATTAT/    | 29876 | A_95_P151787 EB682037     |
| 30653 | 361 | 53 | 540  | AGGCATCTGAACGTTTTGAGCTTTGTACTAGCGGCTATTCTGCTAAAATATATTTAGT   | 29883 | A_95_P210132 BP534671     |
| 30654 | 361 | 54 | 315  | TGACACCAGTTCTGGGTAGCTCTTGTTATGGAATTTGTATCGGCATTAATTTAAATTG   | 29885 | A_95_P099743 BP535049     |
| 30656 | 361 | 56 | 815  | CATCATTCCATTTCCCTCAATGGGAATTCTCTGTTTTGATATATATATATGGCACTGT   | 29889 | A_95_P270511 EB677666     |
| 30658 | 361 | 58 | 205  | AGTAGGAGCATAGGATGCTAGCTTTATACAATTGATTTGCTCAAATTACTATACAGTT   | 29893 | A_95_P090223 BP530865     |
| 30661 | 361 | 61 | 845  | TACTATAAAAGAGTTGTAAGACCTGCTCTCGCCTTGCTTACACAATTGAAATGTAC     | 29899 | A_95_P017246 EB679251     |
| 30671 | 361 | 71 | 209  | TTCGTTCTGGTTAAAAATGCAAGTAACCTTCTGTACGAAGGGAATTGGCGAACAAG     | 29919 | A_95_P107627 CV018466     |
| 30673 | 361 | 73 | 305  | TCTGGTTGATGATTCTGCAGCTATTTTTGGTGTATGACAGAGAGAGATAGAA         | 29923 | A_95_P054231 BP133382     |
| 30676 | 361 | 76 | 849  | ATGATTAAGTAGCAAAGGAGGAGGCCACAATTGCATCTGGCTTTGGTCAATGCTGC     | 29929 | A_95_P011011 TA14032_4097 |
| 30680 | 361 | 80 | 737  | GGCAAGTTGATAGATGGACTCGGTTATGCTTTGAGTTTTATGAAATTTAATGAGCTC    | 29937 | A_95_P222442 TA22033_4097 |
| 30682 | 361 | 82 | 716  | GGTTGAAAACGCGATTAGCCGTGGTTTTGTGGTTTTGATTGTATTAATGTGTCAATT    | 29940 | A_95_P217642 EB433063     |
| 30690 | 362 | 5  | 582  | CGTGGCCGCTGTTGATTCTTTCTACTACTACTATTTGTTATTGATTACTACTGGA      | 29789 | A_95_P187572 TA14377_4097 |
| 30692 | 362 | 7  | 708  | GGAAGAACTATTTGAGGAGATCTGCATCTTTTCAGACAGTAGACGCGAAATATCAG     | 29793 | A_95_P300113 FG154262     |
| 30695 | 362 | 10 | 1581 | GCTTGGTTAGTTAATGGTCATACTTTTGCCTATTTTGGCTTGTATCAAGCACAAAT/    | 29799 | A_95_P010286 TA11799_4097 |
| 30704 | 362 | 19 | 1944 | CTCGGTGTACCTGTTACTTTTCTTATCACGGTAACAACCTTTTATGTATAGCTAATTT   | 29817 | A_95_P011291 AF124369     |
| 30705 | 362 | 20 | 479  | TTGGGTTGCAAAAGCCTGTTGATCTATGCTTTCATTGGTTTAAATAAAACCTCCTGAA   | 29819 | A_95_P058291 BP134441     |
| 30707 | 362 | 22 | 845  | GTGATGTGATTCCCAAATTTGGTCTCTAAATTCGGCTGATGAGTTATTTTATTTGT     | 29823 | A_95_P198882 DV160910     |
| 30710 | 362 | 25 | 356  | GTGTTATTATCGGATATGGTGGACCATTGCCATTTTGTAGTGTTAACAACCTGTAATGT  | 29829 | A_95_P032111 BP527510     |
| 30711 | 362 | 26 | 827  | GCTTGGCCTTCTGTATATGATTGATTACATGTTTCTCCTGTATACTAGTTTGTGTA     | 29831 | A_95_P237494 U65390       |
| 30713 | 362 | 28 | 792  | TGCAAATCCAATCTGAATGCACGTGTGCATCTGAAGAAGATTTTCAACTACTCCT/     | 29835 | A_95_P145917 EB679074     |
| 30718 | 362 | 33 | 793  | CTCGAAATTGCCATCTACATATTCTTGACTTAAATTCATACCTGTATTTGTCATCTCCC/ | 29845 | A_95_P019216 EB679955     |
| 30719 | 362 | 34 | 683  | CCGTTTGGATTAGCTGATTTGAAGTAGCTGATAAGCATTAGGTGCTGAAATTGATTT/   | 29847 | A_95_P115967 DV158464     |
| 30722 | 362 | 37 | 750  | AAAGAAGATGAAGAAACAGCAGCTCAATTTGAGGCACCCGGTAATGACAGTGA        | 29853 | A_95_P137467 EB441197     |
| 30724 | 362 | 39 | 2104 | CAGGTGGAAATGTTGATCAGTCTGCATGGAACACTTTCTTGATGATGACCAAATGGC    | 29857 | A_95_P113182 AF223573     |
| 30728 | 362 | 43 | 403  | AAGGATGATTCCCCATCATCTGTCTTTCTTGGCCGTCAATTTTCAAGAGCCACAGC     | 29865 | A_95_P083690 BP528829     |
| 30733 | 362 | 48 | 204  | CAGCGACATTTGAGTAGTGTTTTTGTCTAATGGCACTGAAATGAGATTCTGATATCC    | 29875 | A_95_P091068 TA13592_4097 |

|       |     |    |      |                                                             |       |                           |
|-------|-----|----|------|-------------------------------------------------------------|-------|---------------------------|
| 30736 | 362 | 51 | 890  | TTGTTTAGTCTGTAAATAGTTGGAATTTCACTACGACCTTACCCCAACTTATCATT    | 29880 | A_95_P015361 DV157623     |
| 30739 | 362 | 54 | 728  | GGTGTTCATTGCTCATTGCTAAGAATGGATGCATAAAGGATTGAAATTTATGTGA     | 29886 | A_95_P002021 FG641754     |
| 30748 | 362 | 63 | 1145 | ATTTAGTTTTCACTGGATGTATTGGCATCTCATTGCACTATCACACTTGCTCTCTATTT | 29904 | A_95_P178897 TA12370_4097 |
| 30749 | 362 | 64 | 418  | TTATAACAAGTAAAAGTACCAGCAAGCTTTCTTGTGTTGCTCAAGTGCATTAAAGTTG  | 29906 | A_95_P193817 TA15752_4097 |
| 30751 | 362 | 66 | 2335 | CAGTACCCTGCAGTTTCTTTTCTTGTTCATTTTTCTTTCTATTTGAAGAGTAAACAAC  | 29910 | A_95_P007326 D83583       |
| 30754 | 362 | 69 | 845  | TTTGATGATAGCTGTCAGCCATCATCTTATCAGTACTGGTTTTGCCCTGTCTGCATGT  | 29916 | A_95_P311318 FG163165     |
| 30755 | 362 | 70 | 437  | TCAAAAGGGGCACAACCTTATTGTTTGTAAAGTTGTAATGGGGCGGATACCCAGTACA  | 29918 | A_95_P283078 AM820007     |
| 30756 | 362 | 71 | 693  | TAATGGTCAAGCTCACCCAAATTTTCCCTTGGAAATGCCTGGAAGTGATGAAGTGGC   | 29920 | A_95_P176202 X65700       |
| 30767 | 362 | 82 | 683  | GACGTGAACAATCCAAAATGAGTTGTAGTTTACAATTGCTGGTAACTTGTTAGTTT    | 29941 | A_95_P117192 DV160010     |
| 30775 | 363 | 5  | 1750 | TAAGGAAGGATTTGCCAAGATTATGTGGCAGCTTATGAATCTTTGTGTTCTCTCA     | 29956 | A_95_P011926 TA12833_4097 |
| 30780 | 363 | 10 | 445  | TTGTCTCAAGCGAGAGTGAGGAGTTATCTGCAAAGGCACAAGTATCTGAAATATTAC   | 29966 | A_95_P276223 AM786095     |
| 30782 | 363 | 12 | 630  | ATAGCTGTGAATCCTTCTCAAAGATTAGCCCGTACACCATTAACAGTTCCACTGCT    | 29970 | A_95_P316258 FG194446     |
| 30783 | 363 | 13 | 201  | GGAACATTGACCCGCCCTAAATAGTTTGGATAAAGAAAGCTTGTGATATATTACTAC   | 29972 | A_95_P106737 CV018042     |
| 30787 | 363 | 17 | 473  | AGAAAAGAACAGATCTGCCTAGCAAGTGTTCATCTTTGATTTCGTAGTAAGACCCAACA | 29980 | A_95_P013201 DV161939     |
| 30789 | 363 | 19 | 814  | GTTGATCATCTGTGATTTACTGTAAGTCAATTCCTATTACCTGGAAATGTTATGCT    | 29984 | A_95_P012131 TA14842_4097 |
| 30790 | 363 | 20 | 586  | GGCCCTGTGCTTTCCATGTTTAACTCTAGTTATATACTGGCTTTGAATGTGAATCTGT  | 29986 | A_95_P161422 FG644316     |
| 30791 | 363 | 21 | 754  | GAAGCAACCTAAGGCCTCAACCAAACATGTAGACTGGTTCTAAATCATGAAATCTCT   | 29988 | A_95_P116957 DW000135     |
| 30792 | 363 | 22 | 758  | TACCAGTGTGTGGACATTGTGGATCATGAGTCACTACTAATGAATAAGATTCTC      | 29990 | A_95_P124937 DW004720     |
| 30793 | 363 | 23 | 765  | ACAGTATTTGGGATGGCTTACATGTTTCGTTACGATGGTTTGGTTCAAGAGATTCC    | 29992 | A_95_P259461 EB450833     |
| 30795 | 363 | 25 | 843  | ACCCGCTTCATGTGGATACACGTGAAGCATGAATTCATACAAAAGAGTAGAATGTT    | 29996 | A_95_P236114 DV999986     |
| 30796 | 363 | 26 | 701  | TTTGCTGATGGAAGTGTCTGTACCTATGGGCTATAAAGAAGTAGAATTTGACAAG     | 29998 | A_95_P244487 EH621158     |
| 30797 | 363 | 27 | 578  | CTCAAGAACCTGTTTATGTTAATGCTAAGCAGTATCGAAGGATCCTGCAGCGACGAC   | 30000 | A_95_P144302 FG136430     |
| 30803 | 363 | 33 | 783  | TACTCAAGGACATATTATCCCTAAGGCATGCAGTAACTTCTAGAACTTTGGTAATCTC  | 30012 | A_95_P146272 EB450258     |
| 30805 | 363 | 35 | 1681 | TAAGCCATATATGGTTGAAATCCAGGAGTGACTGATGAGCAAGGTCTCAACTGAATT   | 30016 | A_95_P029111 TA14918_4097 |
| 30806 | 363 | 36 | 575  | ACCATTATGAGTTTCACTATCTCCTTATATTATCAAATATGTGGAGTGGTTTCTGCCC  | 30018 | A_95_P182612 TA13261_4097 |
| 30812 | 363 | 42 | 868  | ATGTGGTTAAAAGAATTTGGGATTACATTAAGCAAATAACTTGCAGGATCCGTCTG    | 30030 | A_95_P296563 EB677800     |
| 30815 | 363 | 45 | 709  | TTGACACTGTTCTCAATTACCATCCCGATAAAAGCTGTCAAGATGGGAGCTGGTCTTC  | 30036 | A_95_P135302 EB438689     |
| 30816 | 363 | 46 | 779  | TGAAGCACTCTGAGGCTGTAAATTAAGAAGGCCTGACGCCTTATACCATCTGTACCI   | 30038 | A_95_P143007 EB681836     |
| 30819 | 363 | 49 | 612  | GTATATTGAAACACCTTCTTGGGCAGCATATAATATAGTTCTATTGTAGAGCCAATA   | 30044 | A_95_P192027 TA15364_4097 |
| 30820 | 363 | 50 | 429  | CATTTTGGTTGCAACTTCAGTACCACATCCTATTAATGGATATATTGACCAGCGGC    | 30046 | A_95_P275288 AM827414     |
| 30821 | 363 | 51 | 406  | GTTGTAATCTTGGAAACAGTGACCCTTTTCAAGCAAAATGACTTTGATTAATGATT    | 30048 | A_95_P189637 FG645407     |
| 30828 | 363 | 58 | 766  | CGATGACATAGAGGATGAATTGGGCATTGGACCCTTAATCATGTCAATTTAGGGAGC   | 30061 | A_95_P292108 EB448422     |
| 30830 | 363 | 60 | 644  | GCGTGCCTTCGTTTCATCTTACTATGAATACAGCCATAAACCTGAACATGCTCAGGCA  | 30065 | A_95_P146207 EB450974     |
| 30834 | 363 | 64 | 1806 | GAAGCCCTATGAACCTGCATTTTGAATTATTGTGTCAAATAAACGTCTGTTTGTGTG   | 30073 | A_95_P014226 TA11926_4097 |

|       |     |    |      |                                                              |       |                           |
|-------|-----|----|------|--------------------------------------------------------------|-------|---------------------------|
| 30838 | 363 | 68 | 941  | CTTCTTGCTCAAGTTCCTGAGGAATTATTGTTTTGTATTTCAGGATACAGATTTTGCTA  | 30081 | A_95_P206422 TA18512_4097 |
| 30839 | 363 | 69 | 425  | TAAAATCTGGTTCATGTAATTTTGTAAACATTATCTGCCGTCCATCCTTTCACTTTGTC  | 30083 | A_95_P090058 FG157352     |
| 30843 | 363 | 73 | 1264 | GACCTTGCAATTTGCCTCTACATCCCAAATAATGGTCTACAACATGTCAACTATTATTA  | 30091 | A_95_P186537 TA14149_4097 |
| 30851 | 363 | 81 | 378  | ATTTTCCAGAGTTTTGCATCTCCATAGTGCCTCCACCTGCATCAACTGCATATGTT     | 30107 | A_95_P264241 BP526819     |
| 30855 | 363 | 85 | 1138 | TGACAGCAATGTCTCTTTGTATGGCTACTTTAAGTGTGGAATGATGCGAATTACGTT    | 30114 | A_95_P022306 TA12470_4097 |
| 30864 | 364 | 9  | 874  | GCTCTTGAATGTGATCTTGGTCTTTAAGTTGGACCTTCTTGTGGAATTCGTTAATA     | 29965 | A_95_P159882 TA13590_4097 |
| 30865 | 364 | 10 | 883  | TTGTTAGTCTGCCGGATGATATTTTGGTGCAAATATATGTGGTGGGCTTAATTTACAC   | 29967 | A_95_P009176 TA13857_4097 |
| 30866 | 364 | 11 | 1075 | TTGGATGATGATAGGATTGGATATGCTAATCAAGTTGAAAATATTCCACTTGATTGG    | 29969 | A_95_P219877 TA21489_4097 |
| 30872 | 364 | 17 | 734  | CTCTATGCACCATAAACTTGAATCTTGGATCATGTGGATTTTGGGTATGTTTTAATGA   | 29981 | A_95_P119342 DV162464     |
| 30875 | 364 | 20 | 598  | GTTGCAGCTGGTGTACTGATTTTTTTCAGGATTACAAATTATTGATGTAAGTAAAGGG   | 29987 | A_95_P127342 AB300776     |
| 30876 | 364 | 21 | 909  | GCGTGAATAAAATGTCATCCATTTCTAACAGGGTTCATGTTTTGATTACACTTGTCTA   | 29989 | A_95_P023881 TA16184_4097 |
| 30877 | 364 | 22 | 0    | GGAAAACAAATATTTCTTACATCTGCTCTAGTATTACGAGCACTGAGCTCATATTGTG   | 29991 | A_95_P249132 A_95_P249132 |
| 30881 | 364 | 26 | 835  | GAATGAGTAAGCAAGGGTACCATATGTACATTGAATCTGTAACCTTCACTCCTACATC   | 29999 | A_95_P135037 EB438153     |
| 30885 | 364 | 30 | 592  | TCAAAGCTTAATGTAAATTTTGTATGTGCGATCCAATACTGGCTACTGGTTCTGAGTAC  | 30007 | A_95_P261466 BP132437     |
| 30889 | 364 | 34 | 1033 | GGACCAGCTAGTTTCCCTTTGGGTCTTTTGTGATACTTATGAATTGTTTCATTATTTACC | 30015 | A_95_P211657 TA19663_4097 |
| 30894 | 364 | 39 | 610  | TTTTGTCACACGGTTGGAGGCCAGTTGAAGCTACTTCGCCGATTTCTTTGTTGAAAGT   | 30025 | A_95_P191052 DW004979     |
| 30907 | 364 | 52 | 527  | ACAGATTCCAGAACCAACTCCTTGTATCTCCCTTCTAGTGCATTTACTAAGTATTAA    | 30051 | A_95_P222457 TA22038_4097 |
| 30912 | 364 | 57 | 573  | CCTGAGTGATGTATAAATATATACTCCAACGTTATAAAGATAATAGGGCATGGGCGT    | 30060 | A_95_P026411 EB433675     |
| 30914 | 364 | 59 | 227  | CATTAATACAAAACAAGTTGGCAACATGTACCACCGCCGCTCTCTATGCTGCTTTT     | 30064 | A_95_P160452 TA14823_4097 |
| 30917 | 364 | 62 | 0    | TGAGGCATTCTATGAAATCTTTCTTAGCTGCCTCCTGCTCTTCTCCTTTTGTGTCCAT   | 30070 | A_95_P257791 A_95_P257791 |
| 30919 | 364 | 64 | 1794 | GATTCTGATTACAGGAAGTTCTTTCAGGGAGTGACTCTGATGCTGATGATGCACACTCT  | 30074 | A_95_P225017 AJ504731     |
| 30920 | 364 | 65 | 431  | GAGCTGAGACAGATTGTAAGTTAATAGTAGTATAGTTTACAACCTGGCTTCGTTTAGT   | 30076 | A_95_P030011 CV017299     |
| 30924 | 364 | 69 | 849  | ATTAGCAGTTTTAAAGTCCAATGGACTCGCTGATTGTTCTTGTCTTGTCCCGCCTTCC   | 30084 | A_95_P148787 EB678294     |
| 30930 | 364 | 75 | 419  | GTTGTAATAAATACTCACGATCCTCAAAAAGAAAAACCCATTGGTGGACAAGAATTC    | 30096 | A_95_P197247 TA16520_4097 |
| 30932 | 364 | 77 | 1125 | GTGCTGTTTGCAACTATGCAGATCTACATTTTTTGTGAGTGCAAGAACTACTTAATTA   | 30100 | A_95_P027696 TA14498_4097 |
| 30935 | 364 | 80 | 600  | CATGTGGTACTTGAATTGTTTACAGTATGATATACTCAACGCGCTTAGATGCTTGAAA   | 30106 | A_95_P023306 TA13683_4097 |
| 30937 | 364 | 82 | 346  | ATGTAGCAGAAACTGTGCATTGCTCTCCAGAGACTGAAAATTATGCAAGTTAGTTTC    | 30110 | A_95_P033714 AJ632913     |
| 30939 | 364 | 84 | 119  | CTATTAGTAACGGAAGTCCAGACATGAAGAGTCCACCTTCTGCTGATAATGGTTCAG    | 30113 | A_95_P034778 FG164541     |
| 30941 | 365 | 1  | 389  | GCCATTCCTTAAATGAAACATGCTTTGATAGTGGCTGAGATTGATCATCAATGCATAA   | 30116 | A_95_P098753 BP534630     |
| 30945 | 365 | 5  | 738  | ACTGTAATTGTATTGCAATTGGGTCTTTTGCATTTCTGCCCTACAGCTCTTTGGCTTC   | 30124 | A_95_P289353 DV158949     |
| 30950 | 365 | 10 | 530  | AGTTCTGCATTAATGTGGTCCGCTGTTGCTAACTATTTATGACTGATAAAGAAAGA     | 30133 | A_95_P264276 BP526949     |
| 30951 | 365 | 11 | 2237 | CCTACCTCTCGTGTGCCATCCATCTTTTCTCCTTTAATGAATGAGGCTTTCATTATGCT  | 30135 | A_95_P179397 TA12496_4097 |
| 30952 | 365 | 12 | 1218 | GTTGGAAGTGAAGTGATCAAACACAAAGCAGATTGAGGAAGATGTGATTTTTCCCA     | 30137 | A_95_P030716 TA14129_4097 |
| 30954 | 365 | 14 | 466  | TTCCTTCTAATGGCTGTACTTGGTGTACTAGCTTCTTTGCAGAGATAACTTTAGCACC   | 30141 | A_95_P064485 BP136068     |



|       |     |    |      |                                                             |       |              |              |
|-------|-----|----|------|-------------------------------------------------------------|-------|--------------|--------------|
| 30955 | 365 | 15 | 254  | CCTTTGTTGTAACAATGGCCTTCGCCAAAATGGGATTAGATTTAATATCATTGTTTA   | 30143 | A_95_P032156 | EB433693     |
| 30956 | 365 | 16 | 132  | GGATGAGTCTACTTTGGAAATCAATGGGAAGCAGATTAAGTCAGTAGCAAAAGGG     | 30145 | A_95_P095303 | EH665096     |
| 30958 | 365 | 18 | 454  | CTTAATTTGGAACATATGTTGACAGTATGGGCTACGGCTATTTTGAGCAATCGTATCC  | 30149 | A_95_P100343 | BP535332     |
| 30959 | 365 | 19 | 960  | GTACATATACTGATATCCCCCTCCATCTCAACCTTGTAACATCTTTAATGTATGTGAA  | 30151 | A_95_P190817 | TA15096_4097 |
| 30960 | 365 | 20 | 554  | CCAGAAGGTGTTACTAATAAGATCTATGAGAACACTACGACAATAAAGGAGTATTTG   | 30153 | A_95_P137207 | EB440925     |
| 30963 | 365 | 23 | 394  | GTCCAAGGCTTGGGAATCGTGAAGAAAGAACACATCAAAAATTCACGGGTTTCCTGC   | 30159 | A_95_P110762 | CV019886     |
| 30964 | 365 | 24 | 465  | GTACACTGTCCAGGTACGCAGTTTGTCTTACACTATATGATGTGTCAACTGAATGCAC  | 30161 | A_95_P050561 | BP132423     |
| 30967 | 365 | 27 | 1058 | TCAGTGATTTATCCTCCAGTTTGTATAAGCTCTTTGTCCCCTATATATGGGATATGT   | 30167 | A_95_P217362 | TA20916_4097 |
| 30969 | 365 | 29 | 714  | AACAGAAAGTGTGCCCTTACTGTAAGGCGAAACTGTGGAGCATGCTGCAAGCAAAAA   | 30171 | A_95_P279973 | EB439536     |
| 30971 | 365 | 31 | 416  | TTTTGAACTTAATTCACAATTGCTAGTATCACCTCGGCTGGTGGGAAATCTAAAATC   | 30175 | A_95_P120042 | AM789623     |
| 30978 | 365 | 38 | 98   | CATTGGGCATTATACCACACATGGTCTACAAAAACTTAGTTAGTAAAAAAGTGA      | 30189 | A_95_P144952 | EB448512     |
| 30979 | 365 | 39 | 0    | TATGCTGACATGCCGCACATGGTCCCTTCATACAAGTTTTAGTCTTTTATGTAAAAGA  | 30191 | A_95_P287828 | A_95_P287828 |
| 30983 | 365 | 43 | 736  | CAAAAACAGTCCAAATGGACTTGTGGGATTAGAGAGAAGATTTCTCAAGTTCAACGC   | 30198 | A_95_P136912 | EB440605     |
| 30987 | 365 | 47 | 256  | AATGTCGGGTTTCGAGTTTAAAGCAACTGTTGTTACTCTGTTAATAATGGAATAAAGTC | 30206 | A_95_P125177 | DW004969     |
| 30988 | 365 | 48 | 537  | GATTTTTAACCTTTTCGTTAGTAGCTTAGCAAAGTTGTTACCGTCTAGGTTTCAGCTT  | 30208 | A_95_P220562 | BP525818     |
| 30990 | 365 | 50 | 776  | TATTGTCAAGGATGAAGATGCTGAGGCTCAAAGGAAGATCCTGTCAAGGAGAAAAG    | 30212 | A_95_P149392 | EB679217     |
| 30994 | 365 | 54 | 1304 | ATCTTAAGGGTGTGTTTCAGTGGTACCATTCAACAATAGCAATGCCATTTTTGTTGT   | 30219 | A_95_P209057 | AF191497     |
| 31003 | 365 | 63 | 784  | ATCATGAAGCTCAGTTCAGTTTGTCTTCTGGAACGTGAATCCTGCCTTCTGGCATCATT | 30237 | A_95_P309938 | FG135371     |
| 31009 | 365 | 69 | 838  | AGCTTCTTAGTACTGGCTTTGTCAATGCCATCAAATCTTCATGAAAAAAGTTGTTCT   | 30248 | A_95_P130327 | EB430351     |
| 31016 | 365 | 76 | 526  | TCCTCATGCTGCTCTCGCATCCACGTCATTCAACCGGTGCCATTATATATATTAAGGAC | 30262 | A_95_P047541 | BP131683     |
| 31017 | 365 | 77 | 758  | AACAATGCTCAGAAGGATCATAATTCGTTGGGCAATTCGATCGTGTCTGGAGTGTA    | 30264 | A_95_P302943 | FG147521     |
| 31019 | 365 | 79 | 566  | GAGGGTTGGATATATCCAATTTTGTGTTAGGACAAGGAAACCTGTTTCAGTATGTAAT  | 30268 | A_95_P102037 | CN949756     |
| 31021 | 365 | 81 | 1006 | AAACCTCAAAGTTTTACAGAGTTCGCTTAGGTGATGGATCTGTTGAAACACTTTTAAA  | 30272 | A_95_P221827 | TA21901_4097 |
| 31027 | 366 | 2  | 348  | GACAGCAGCTTATGAAGGGTCAAGTTGTATTCTTAAGCCCGTAGTATCCTCTATGTA   | 30119 | A_95_P103347 | CV016468     |
| 31029 | 366 | 4  | 2807 | AGAAGTTGCTGATTGCATGCAGCCTTCGTAATTTTACAGGGGTGAGATTGGTAGAAA   | 30123 | A_95_P239164 | AY219234     |
| 31030 | 366 | 5  | 912  | GAAAGCATCAAAGAAACTGTGAAAGCTTGAAGGAGAAAAAATTCTATTTCAGATGC    | 30125 | A_95_P248947 | AY911854     |
| 31033 | 366 | 8  | 610  | AACCGGTTCTAGCTCCATTTGAGTTCAAATTTGGCTAATCATTACCAGTATCTTTCC   | 30130 | A_95_P017526 | BP530512     |
| 31034 | 366 | 9  | 713  | GAGGCTGATTTTGTTCCTTCCATTTAGCTTGCTCATTACCTCTTGTGTGTTAATTA    | 30132 | A_95_P289368 | DV159060     |
| 31036 | 366 | 11 | 784  | CGAATTTACATCTTACCGGTGAGTGATCCACTTGTCACTTCTTCACCTATGAATCCATG | 30136 | A_95_P025981 | EB681743     |
| 31039 | 366 | 14 | 589  | CGGCTGAACTTATATGTGAGCTGGAACCTTTACATAGTCCAAGTAAGTTGATATATAC  | 30142 | A_95_P286883 | FG635003     |
| 31042 | 366 | 17 | 414  | AGCTCGTACTGATGTTTCATAGATGTGGATTAGCAAGAAAGAACTTTGTCAAATTTG   | 30148 | A_95_P144467 | EB447819     |
| 31045 | 366 | 20 | 816  | AGAATACATTTTATGTGTGTAATCCCAAATGACGCCTCTTCAGATGTTGGCATTATC   | 30154 | A_95_P206132 | EB438385     |
| 31046 | 366 | 21 | 674  | AGTGCGTGTGAGATGCTGAGCATTAAAGCTCATTGTTGGAATACTTGCAACAACAA    | 30156 | A_95_P234764 | FG642251     |
| 31057 | 366 | 32 | 896  | TGCTTCAGATGAGGAGATCCAACATCTGAGAAGATACGGTCGAGCAGTTGGTGTCTT   | 30178 | A_95_P232629 | EB426431     |

|       |     |    |      |                                                             |       |                           |
|-------|-----|----|------|-------------------------------------------------------------|-------|---------------------------|
| 31058 | 366 | 33 | 768  | GTTGATGAAGTTGCAACTTGAGAGTAGAAAAATGTAGTTCAGAATTAGTTTTTCTCC   | 30180 | A_95_P201482 EB681917     |
| 31059 | 366 | 34 | 129  | AATATTACATTACATAGCATTGATGTTTTGCGTATCCTGGCCCGGTTATTCGACTTC   | 30182 | A_95_P210602 EH617005     |
| 31062 | 366 | 37 | 749  | GATTATTTAGGTGTAGTGACTTGCTATGCCTGTTGAATTGTCCTTTTGTGGGAATT/   | 30188 | A_95_P164887 EH624292     |
| 31063 | 366 | 38 | 197  | GGGCACTTTAAGGCCTCCTTAGAAGTTGATCTAAGTTCTGAAAAATCCATAAAAAATG  | 30190 | A_95_P144717 EB448230     |
| 31064 | 366 | 39 | 1036 | CTCCTATTGCACCTTTACCTTATTGGTTAACCTGTTATGAACTTCTAAGCAATTCTAT/ | 30192 | A_95_P009576 TA14308_4097 |
| 31065 | 366 | 40 | 287  | AGTTCTGGTCTGATTCCGGCAGTGAACAGTCCGAAAACACGAAAATTCGGTGAATAT   | 30193 | A_95_P102707 DW000146     |
| 31066 | 366 | 41 | 356  | GGCTGTAAGCTGTAAGGAATGACAAAGCCTCCACAATCCCAAATACACCAAAGGTCT   | 30195 | A_95_P111977 CV020459     |
| 31069 | 366 | 44 | 776  | GGATCTGAGGAAAGATTAATTTCTGTTTCTCGTTCCTGAGTTTCTTCTTTCATTTAGC  | 30201 | A_95_P240294 DV158685     |
| 31072 | 366 | 47 | 406  | TTTTCTGTACCTGTTTAGACCCTCAGATCAACTGTTGTTATCCTTGGCCGCACTTTC   | 30207 | A_95_P088298 BP530008     |
| 31079 | 366 | 54 | 808  | GAGCTGGGGCATTTTAAATCATTGGTTTTGGCAATTGCTGGTGGATTCTTGGTGTTA   | 30220 | A_95_P182402 TA13208_4097 |
| 31080 | 366 | 55 | 787  | GTCTTCTGCATCTGTGCTCGGAAGTGTATTTGCATTGTTATTTATGCTGTGTATGCTG/ | 30222 | A_95_P010716 TA13715_4097 |
| 31082 | 366 | 57 | 561  | TCTATGGAATGTATGATTGGTCCTGAAGGAGATCTTACAGAGACCACGAAGAACAC    | 30226 | A_95_P059206 BP134682     |
| 31083 | 366 | 58 | 369  | GTTTTTCAGGAGATATATGAGTTGAGCACATAGACAAGAGTGAATTAAGCTCGCCCA   | 30228 | A_95_P148942 EB678528     |
| 31088 | 366 | 63 | 573  | CTGTTGCTTAAAACAGAATAGATGATACCCTATACCTTTTATACCTCTCTCTCTCTA   | 30238 | A_95_P316498 FG188840     |
| 31089 | 366 | 64 | 739  | TTGTCGTGGGCTTAAGAAAGCTGCTGAATTTTGATATTACAATTAGAGTCAGAAAGA   | 30240 | A_95_P298198 EH617940     |
| 31090 | 366 | 65 | 1357 | CTAGATTTCTTGCTAGAGTAAACGGTTCAAATGCAATCTGACTAAGATTGAGGCGGC   | 30242 | A_95_P232119 AJ414052     |
| 31092 | 366 | 67 | 1102 | GAGCAGCACATTCTTTCATTTGTCTGTGTTTGACATGTTGAGTGGTGGTGGTGGT     | 30246 | A_95_P016801 TA16297_4097 |
| 31093 | 366 | 68 | 661  | AATAGGGAATTTGGGATGTGAGCACGGCTATCATTGGAGTGCATAAAGCAGTGGT     | 30247 | A_95_P132747 EB433422     |
| 31094 | 366 | 69 | 725  | TGGGGGTGCAATATTGCTACTGTGAGAGTTGATAAGCACTGATATCCTTTTTATGTA/  | 30249 | A_95_P163612 EH622658     |
| 31095 | 366 | 70 | 590  | ACTGTAAACTGAAGCTTATTGTGACTGTCCCTGAATTGCTTGATTAGTTAGTTAATAG  | 30251 | A_95_P124122 DW003976     |
| 31096 | 366 | 71 | 609  | TAATGGCTTTCTGGTGTACTGTGCTATTACCAGCTATGAAGGTCGTTAATCATTTTGT  | 30253 | A_95_P022721 DW002470     |
| 31100 | 366 | 75 | 620  | CTCTAGCGAGGATGGTACTGCAGATGCGTGGTCCATTAATCAAGGACATAAATGG     | 30261 | A_95_P002818 DV157885     |
| 31103 | 366 | 78 | 699  | GTTTGTTCAGTTCGTTGCTTCTGTTTGTGTCGTTGGGGCTTTAAATCCAGCGATT     | 30267 | A_95_P309253 FG645389     |
| 31108 | 366 | 83 | 790  | AAATGTGGTATGCAATCAAATCTTTTATCTGAGAAGTACTACTGTGCAAAAGGATCC   | 30276 | A_95_P120507 DW000465     |
| 31111 | 367 | 1  | 680  | GTCTTCTCATTTCGAGTTTTTGTAGTTGCGGATTAATTGTTGAGTTATGCTGTAGCAT  | 30281 | A_95_P193802 DV158519     |
| 31114 | 367 | 4  | 659  | TATGAGTTATGCTATATTTTCAAGCACAAAGCACTTCACGGAGTAGTGATGATTGCTCA | 30287 | A_95_P235094 FG200594     |
| 31118 | 367 | 8  | 1038 | CATTGGAAGTCTTGTGGAGGAGTTGCAGAGACAAAAGATGAAGAATATTCAGTTGG    | 30295 | A_95_P216752 TA20773_4097 |
| 31119 | 367 | 9  | 180  | CACCTAGGGATTTGATTAACATTTATTTGTTTGGGCTTCACATGAAACTTCTTTGAT   | 30297 | A_95_P028251 TA17494_4097 |
| 31120 | 367 | 10 | 378  | GTACATTGAGACCCAACATCACTTGTTTTTATTGTTGTTAGTAGTGTGAATTCGTGT   | 30299 | A_95_P219507 AM808565     |
| 31121 | 367 | 11 | 839  | GCATCTCAGCATTATGTGGTCACTTGTGTAATTTGAGGATATATCACAGAGACGTGC   | 30301 | A_95_P291283 FG157644     |
| 31123 | 367 | 13 | 505  | CTTATCATATGTGTTTATGTGGGACCTTTTGTAGGCTCTTTTCAATCTTGTACTCT/   | 30305 | A_95_P186452 TA14131_4097 |
| 31132 | 367 | 22 | 390  | TTGGGATCCTTGGTAGTAGTGCACCTAAAATGGGAATTTGTGGATGCAACAGTATTA   | 30323 | A_95_P067340 BP136843     |
| 31136 | 367 | 26 | 768  | ATTGGCTATTTTTGTGCCAACTCAAATGTTTTACTAGTTACCCTGCTGTACCTTC     | 30331 | A_95_P196567 TA16367_4097 |
| 31138 | 367 | 28 | 549  | ATGCAAGGTGCCTGAATTAGGAGTCTTGATTATCAATGGGATGAAAAGGACTTAAT    | 30335 | A_95_P068955 BP137257     |

|       |     |    |      |                                                             |       |                           |
|-------|-----|----|------|-------------------------------------------------------------|-------|---------------------------|
| 31144 | 367 | 34 | 716  | ATTAGATCAGGGACACGGGCATCACTTATAAGATTCCTTCAACTCTGGTGGCTCATC   | 30347 | A_95_P285248 EB427414     |
| 31147 | 367 | 37 | 604  | GTATTCGAGATCTTCTGGATTTTGGGCTTAAAATATACCGTTCCGTTTGGAAATTTT   | 30353 | A_95_P202597 TA17670_4097 |
| 31148 | 367 | 38 | 800  | TATGACTTGATTCAGATGTAGATAAGGGGTGAAAACCGTTTTGTTTGCTAACTTTCG   | 30355 | A_95_P030891 EB431338     |
| 31151 | 367 | 41 | 1056 | ACAGGCGAGCTTAAATTTTTGACTGTTTAAAGCAATATGAGAAACTCCACCGTTATCC  | 30361 | A_95_P019726 TA16869_4097 |
| 31156 | 367 | 46 | 0    | GCTGGAGTTGAATTTGGGACATTTTAACTTCAATAATGTGGCCAATAGACTTTCAA    | 30371 | A_95_P234044 A_95_P234044 |
| 31157 | 367 | 47 | 285  | ATCTTACAAAGCCATTTGTTTCCATGTACTTTGGCGCGGGCTATTTGGCTTGGTTGTC  | 30373 | A_95_P077020 BP527144     |
| 31158 | 367 | 48 | 829  | TTAGTACTTTTTTGTGTGGTTCGGATGGTACGGGTTTACCGGGATCTTTATAGATT    | 30375 | A_95_P309468 FG167388     |
| 31161 | 367 | 51 | 656  | CTAGAAGGTCAAATAGCTATAGTTCTTCGCTATGTCTCTCTCTATATATGTAGTACT   | 30381 | A_95_P293488 FG640583     |
| 31162 | 367 | 52 | 323  | GTCGTAGAAGATCTCAAGTCACGGAGCACACTTAACTTGCCCCAGACAATAAAATT    | 30383 | A_95_P058471 BP134481     |
| 31167 | 367 | 57 | 583  | CGATAGAATATCAATCAGGTAGACAGACTTTGGCCCAAATTGGTAAGAAAGAGAAC    | 30393 | A_95_P240229 FG639535     |
| 31168 | 367 | 58 | 820  | CAATTTCCATAGTTGCAATCATTTCTTTTGTCTCAAAATGCATAGAGAGGCACGTCGAA | 30395 | A_95_P152232 EB682544     |
| 31176 | 367 | 66 | 311  | CCTCTACTGATGGCATTCTTACTTCTATGATCAGAAATGAACAATTACAACCCTCAAAC | 30410 | A_95_P019206 TA16840_4097 |
| 31178 | 367 | 68 | 346  | TTTTTAGCCCTGTACGTGGGATATTCTGTCTGGCAATCACTTAATCTATAATATTGT   | 30413 | A_95_P202087 TA17560_4097 |
| 31181 | 367 | 71 | 517  | GTTGTTGACAGTTGTGGTTCGGAGCTTTCTATTTCTATCGAGGTCGTCTTTGGTTCATC | 30419 | A_95_P260806 AM809585     |
| 31182 | 367 | 72 | 921  | CTTCTCACCAGATATAATGGGAGAACCCTTGGAAGTGAATCTAAAAGCACCACAA     | 30421 | A_95_P031786 DV162276     |
| 31184 | 367 | 74 | 400  | TTCTGCTGTAATGTAAGTTCGCTGTATACTGTAATCTATACAATCTTGGAAAGTTGAA  | 30425 | A_95_P097583 BP534113     |
| 31185 | 367 | 75 | 497  | GTTCAAGTATGAGCTGCTTTCATCTACTCACTTCTAGCATGTGGTAAATCTGCTCTAT  | 30427 | A_95_P020971 FG638231     |
| 31187 | 367 | 77 | 292  | CTTGATCAAAGAAGATCTTTAGATGAAAGCACCAGATCTAGGAAGTATGCATCGTC    | 30431 | A_95_P029831 CV016585     |
| 31189 | 367 | 79 | 545  | CTTTAGCTCCATCCTTCACAGTGAAAAAGCAGCCATTGGATGTGAATATAAGCTGATT  | 30435 | A_95_P048191 BP131844     |
| 31192 | 367 | 82 | 1060 | TTTTTCGTTCTTGAAAAAGGGTGGTAGTTCTTAGGGGCTAGTAGTAGTCAATTTGGA   | 30441 | A_95_P203932 TA17959_4097 |
| 31194 | 367 | 84 | 338  | GATGATGGAGAGCTCTTTGATGGTGGATATGATATGAGTACTGGTGGTATTTGTGG    | 30445 | A_95_P081385 FG638686     |
| 31198 | 368 | 3  | 803  | TTTTGGGGTTGCTGGAAATTCTGCCACAGTTTTGTATCTAACCTTCAAATATACAGA   | 30286 | A_95_P218007 EB434642     |
| 31202 | 368 | 7  | 602  | TCGGAGGGATTTCTTGTAAGCTTTGAATTTTCAGCTTTACTCATTTACCTCTTGTCTAT | 30294 | A_95_P251999 U66266       |
| 31205 | 368 | 10 | 813  | ATTGAAAACAGAGTGGTTTTGTCTCCACATGCAGAGATGTTGCTAGAGTGACGGCAC   | 30300 | A_95_P295528 FG159719     |
| 31206 | 368 | 11 | 498  | ATGCCGTATGCAGCTTCCCTTATATTTCTATGAAGAAGCTGTTCCACACTTGAACCC   | 30302 | A_95_P278998 AM839551     |
| 31207 | 368 | 12 | 697  | TTAAAGAGAGGTGGCAATGGAAGATTCTTGAAAAGCTGCTGCCTATGGTCACTTTGGA  | 30304 | A_95_P297348 EB683060     |
| 31208 | 368 | 13 | 900  | CTGGATTTAGGCATTTTCGATGACTCTTTGTATCACTGCTGAATTGGTTTGATATAAAA | 30306 | A_95_P032501 AB119475     |
| 31209 | 368 | 14 | 825  | AACTATTTCAACCAATTGGAGAATACCAAGAAGCTTCTGCTGGTAGATGGTGGCCCA   | 30308 | A_95_P126347 EB425699     |
| 31211 | 368 | 16 | 1569 | ATAACTCCAAGTTTTGGATGCTGTTTGAATTTTATTGAGAGTAACTCTTGGCCTTG    | 30312 | A_95_P179677 TA12562_4097 |
| 31215 | 368 | 20 | 95   | CTTTATTCATTTGTGATCAACAACATTCTTCATTGATGCCAAGCGATCACAGGTTCAA  | 30320 | A_95_P031486 CV018605     |
| 31217 | 368 | 22 | 1638 | ACTATAGCTGGTATAGATCCAGCCATGCTTTTCTTATTGGTTTATGAGTCTAGTAGTA  | 30324 | A_95_P159307 TA12251_4097 |
| 31218 | 368 | 23 | 499  | CACCCATATATGAACTATTTTGAACCTGCTCCTTGTGTTTTGACTCCAGCCATTTTGT  | 30326 | A_95_P164057 EH623176     |
| 31221 | 368 | 26 | 1450 | TTCAACTGTGGATGTAACCTCAACTACCATACCCATAGGAGGAGATTGAACTTTAGT   | 30332 | A_95_P196213 EF051136     |
| 31222 | 368 | 27 | 621  | GGTCTTGCTGTTCCCTTTTGGTGTATCATGTCTATTATTTAATCAGATTGTTACATGAA | 30334 | A_95_P123422 DW003266     |

|       |     |    |      |                                                             |       |              |              |
|-------|-----|----|------|-------------------------------------------------------------|-------|--------------|--------------|
| 31223 | 368 | 28 | 739  | GAGATGCTATTAGCATCTTCGCTTCTCATGATATTTGGATCGACCACGTGTCGATGTC. | 30336 | A_95_P189562 | EB427133     |
| 31226 | 368 | 31 | 70   | TTTCGTATGTTGATTCTCAATTATGTAGCTGAATTGTGGCCCGAGTCTCAGCCTGCCCT | 30342 | A_95_P104987 | CV017252     |
| 31227 | 368 | 32 | 1325 | TCGCGAAGAGGAAACTAGCAGCAAATGTTGGATGGCAAACCTGATTTGAGTTCAC     | 30344 | A_95_P228884 | DQ672264     |
| 31228 | 368 | 33 | 554  | TTTCCGATTTTTCTCTTGAATGGATTTGAACTCAAGCTTGTATTTGCCGGCTACATT   | 30346 | A_95_P153727 | EB683929     |
| 31233 | 368 | 38 | 757  | AGATACATTTGCAGATGTGAAAATGACTTTCTTTGTGGGCAATGTGATCGTGGTTTG   | 30356 | A_95_P203362 | DW001694     |
| 31237 | 368 | 42 | 813  | CAGTTCTTTGGAAGCTTTTAGATGCAACCAACAAGAGCTCTAGCAAATTTCTGTTTATT | 30364 | A_95_P252614 | DV161053     |
| 31238 | 368 | 43 | 821  | AAATTCCTTTGGACAAAGGGTGAACCAAGAAAGGGTGTGTCCACATATTCGTCTTGAAT | 30366 | A_95_P030361 | EB438473     |
| 31240 | 368 | 45 | 798  | TGAATCTTGGTGATATGCTTGAGCGCTGGAGCAACGGTATATTCAGGTCAACATTGC.  | 30370 | A_95_P250612 | EB450250     |
| 31241 | 368 | 46 | 91   | ACTCAAAACTCCGACTGTTTCAATCAGCCTAACTTGAACAAATTTGTGGGATTGGG/   | 30372 | A_95_P192542 | TA15474_4097 |
| 31242 | 368 | 47 | 545  | GCCTCTCTTGATAACATTTATGCTACGTTGTTAGAACTTTGTTTGATTTTGTGGCTT   | 30374 | A_95_P299948 | FG626154     |
| 31248 | 368 | 53 | 806  | TTCACAGTTTLAGAGTGCATAAGATGCGCCCTCGCAGGGATGTATGCAGACATTCCA`  | 30386 | A_95_P243317 | EB447909     |
| 31250 | 368 | 55 | 1127 | TGGGACCCTTACAAGCATCATTTCCATCTGAGAGTTTCTTCACTTGTACATTCAAATGT | 30390 | A_95_P028046 | TA13851_4097 |
| 31255 | 368 | 60 | 820  | GGTGCTGCTACTAACCTTAGGAACAACTTTTCAAGAATTTCAAGTCCCTTAGCCCCAC  | 30399 | A_95_P211227 | EB424750     |
| 31256 | 368 | 61 | 611  | TCTTTGCTAAAGTATGAATGGGTTGAAGCCGGTAATGTACAGGCCACTCTGAGGTGA   | 30401 | A_95_P063875 | BP135896     |
| 31258 | 368 | 63 | 828  | AGTTGTATACCAGTGGTATTTCTGTTCTTCCATTTTTCTTTTTGGGTGTAGAGAGAGG  | 30405 | A_95_P219157 | EB446619     |
| 31263 | 368 | 68 | 637  | CTTCACATCATGGGCACAAATTATAGCTTAAAAGAGAACTAACTATGTATCTC       | 30414 | A_95_P138007 | DW004524     |
| 31266 | 368 | 71 | 788  | GTGTCTCCTGAAGTATCCTTTAGCAAATCAGACAAAAATTAACCTTGGAGAGTTCCTG  | 30420 | A_95_P249087 | DV159725     |
| 31272 | 368 | 77 | 734  | CTGATTTTTCTTTGAAACTGTCCTGATAAGAGGAAGCAAAGTTTCATTTATAGAGCA   | 30432 | A_95_P012076 | TA18471_4097 |
| 31274 | 368 | 79 | 831  | ATCAATTGACTCGAACATGCTGTATAGTAGTCGAGTTTCGCGGATCTGACGAAGCAG   | 30436 | A_95_P312713 | FG158027     |
| 31277 | 368 | 82 | 532  | TGTGTTCTATGCTAGTGTAATGCATACTTGTGTCATTTAATTTGCCCACTTAATTT    | 30442 | A_95_P123877 | DW003760     |
| 31284 | 369 | 4  | 575  | AGCTTCTTAGGTGGATTTATCAACTCAATCTGATGACACAAGCTTGCAAGAAAGAAT   | 30455 | A_95_P069915 | FG626716     |
| 31285 | 369 | 5  | 852  | AAGTGCTTCTTTCTCCCTAGTGGCATTCTTACTGCTTCTTTAGTGAGATTTAACTTGT/ | 30457 | A_95_P116357 | DV159070     |
| 31289 | 369 | 9  | 904  | TAAATCAGCTCTGTCCAGTGATCTGAATGAGATCTCCAGCAACAGCTCAGTGCATTT   | 30465 | A_95_P242467 | TC43443      |
| 31293 | 369 | 13 | 640  | ATCGGTCAAGATCTGAAATATGTGAAACCTCCTTTCTTTTTCATGAAAAGGAACA/    | 30473 | A_95_P207682 | TA18793_4097 |
| 31296 | 369 | 16 | 142  | CACTATTTGGAAGTGGTTAACTATGACTGTAAAGTTCCTGCTTGGCCAAGTGTGTT    | 30479 | A_95_P102307 | CV015972     |
| 31306 | 369 | 26 | 1261 | GTGATTAATTAGTTTCCCCTTGAATGACCAACAAATGGCCATAGTATAGTTTGGAT    | 30499 | A_95_P249062 | EU342421     |
| 31312 | 369 | 32 | 526  | GTGAATCCAAACAGTTGAGGGGCACTAAATGAGATTAATGATCTCAAAGTATTGGCC   | 30511 | A_95_P202972 | TA17756_4097 |
| 31318 | 369 | 38 | 161  | CTTTGTAATATAATCCTCATGTGAGAGGATATGACATGTTGTAGCTTTCTTGGTGG    | 30523 | A_95_P090438 | BP530955     |
| 31320 | 369 | 40 | 839  | CAAAGAGCTTTTCAAATTGTTGAAATCAACTGTACATTCGTCTGTTCTAACTAGC/    | 30527 | A_95_P203777 | EB439646     |
| 31325 | 369 | 45 | 546  | CTATTTTCAGAGGATGGTATGTCTTTTCTAGCTAGTTGCCAAAACCTTGTCCCTCGAC  | 30537 | A_95_P066320 | EB681611     |
| 31328 | 369 | 48 | 730  | GAAAAGGAAACGGGAGTAAAATCATACTCCATTATCGCGGAAAGAGGATTGTCT/     | 30543 | A_95_P287618 | EB428479     |
| 31332 | 369 | 52 | 894  | TGGCAATCATCTCCAAGACTCTTTTTCAAGGGCTTTCATGTATTAGAATCATCTGAA/  | 30551 | A_95_P009311 | TA14277_4097 |
| 31333 | 369 | 53 | 483  | GGACTTGAACAACACTCCGCATTTTCGTACCTAACTGTCTACTCTTTTCTGTCTTT    | 30553 | A_95_P020841 | TA17037_4097 |
| 31347 | 369 | 67 | 345  | AGGTTCAAATTCCTGTAATGTAAGTTCACCAGAAAAGTAGGTCTTACGTATATCA     | 30581 | A_95_P083735 | BP528841     |

|       |     |    |      |                                                              |       |                           |
|-------|-----|----|------|--------------------------------------------------------------|-------|---------------------------|
| 31348 | 369 | 68 | 586  | GAAGGTGTATGGCTGTCTATCAGACTTACATCAATGCCATGATTGCGGATCCTTTCAT   | 30583 | A_95_P062050 BP135415     |
| 31353 | 369 | 73 | 1447 | CCCTTCTTTGTAGGACAATTTCCAGTTGTAATGATGTGATTGTATCGAAATTGTTATCC  | 30593 | A_95_P027416 AJ438265     |
| 31354 | 369 | 74 | 470  | TCATATTGGTGGATGCAATGTTGTAACCTATAGTGCCCGTTAATGCTCTAGTGTATTT/  | 30595 | A_95_P063625 BP135831     |
| 31359 | 369 | 79 | 451  | GATTTTGCCGAAAGCACTATCATGACCTTAAGGAGAGACCATTCTTTAACGGCCTA1    | 30605 | A_95_P125727 FG635539     |
| 31363 | 369 | 83 | 1049 | CATTACTTGCTTGTGTTGATGACTTAGCTCGTATGTATAGTCTCATTGCGATGTTGTGT  | 30613 | A_95_P180952 TA12863_4097 |
| 31365 | 369 | 85 | 2135 | GGATAACTAGTTGTGTCATTCACTCGATGTGTGAATTCGTTTTTCTTTACTGGCATAA1  | 30617 | A_95_P028141 TA12496_4097 |
| 31374 | 370 | 9  | 877  | TGCCACTGTTAAGAAGGTATCTCTTGAGCTAGGAGGTAATGCACCTTGCATCATCTTT   | 30466 | A_95_P231589 EB680600     |
| 31375 | 370 | 10 | 456  | AATTTGCATTGCAAGCCTGATATCTCCTTACAGAACAAGATCGAGATGCTTGTCTGTGT  | 30468 | A_95_P075030 BP526621     |
| 31379 | 370 | 14 | 538  | TATGCAAAACTGCAGGTTGTATGCTTCCAATCAAGTGATGATCGTAATTTGACTGCCT   | 30476 | A_95_P284203 FG637809     |
| 31382 | 370 | 17 | 731  | GATGGCAAAGACCGGTGTTATTTGTAGATGCATTTTTGTTTATCACATTCTGGCGCTC   | 30482 | A_95_P269821 FG174896     |
| 31383 | 370 | 18 | 965  | TTGAATGGATTGTGCTGATATTGATTCAGCTGAAATCAGACTGGTGTTCCTTTCCAC    | 30484 | A_95_P022791 TA17553_4097 |
| 31384 | 370 | 19 | 750  | GGGTTGGCTTGTATATAGATCCATAATTTACTGTTTCTGGAATTTGGATGATCTTAC    | 30486 | A_95_P206547 FG158098     |
| 31388 | 370 | 23 | 89   | GTGTATAACAATGTCACTGATAATGTATTATGGTCCTCTTTTTCTTTTTTCCGAGGC    | 30494 | A_95_P130807 EB430908     |
| 31389 | 370 | 24 | 188  | TCGAAACCAAATCTTGGCCGCTCTTCTCCTATCTAAAATTTACTCTTGCCTATTAGC1   | 30496 | A_95_P161492 EH620222     |
| 31398 | 370 | 33 | 672  | TTGCAAGAATCTAATGGTTTTGAAACTGTATGATGGGTTCAATTTATGCGTCTTGACC   | 30514 | A_95_P015701 TA14679_4097 |
| 31400 | 370 | 35 | 223  | CGATTAATCAACAGCTCCGAGAGCTTGAGAGAGGGAGTTTGATTATTTCTTTGTGGC.   | 30518 | A_95_P241575 FG167825     |
| 31401 | 370 | 36 | 167  | GAAGGTTTTACGTTGTTTTGGTCAATTTACGGGGAAGAAGGAAAATTGCAAAGTTC     | 30520 | A_95_P095453 BP533199     |
| 31402 | 370 | 37 | 728  | TTGAAAGAACATAAAGCTGTTGGATACTCTTTCGATAGGCCCTTCATCCTTCTGAAT,   | 30522 | A_95_P206942 TA18631_4097 |
| 31403 | 370 | 38 | 419  | TGGATGGTCTGAGTCAAGAACCATCAACTGACAATTTGTTTTGATTGGTAAGGGTA`    | 30524 | A_95_P099488 BP534949     |
| 31405 | 370 | 40 | 711  | ACCGGGCTGACTTTTTGTATTTATTCCTGTTTCTCTAGTGTGCATTATCAAAAGTTTAGA | 30528 | A_95_P148757 EB678241     |
| 31407 | 370 | 42 | 729  | TATGTTCTTTCACCTTCTTGTGTTGTTGGTGACCTGTGTATGGATCTAAGAATGATG(   | 30532 | A_95_P126622 TA15758_4097 |
| 31408 | 370 | 43 | 813  | TTTCTGGGGTTCACAATTTGTCCCAGATTATTACGTGTAATTTAGTCGGGATAAGATG   | 30534 | A_95_P013956 TA14708_4097 |
| 31411 | 370 | 46 | 316  | TCACTTGCTGTTTGTATAACTGGTATACTCTTCTGACAATTGTATTAAGCTTTTCAGCTI | 30540 | A_95_P091538 BP531404     |
| 31414 | 370 | 49 | 431  | GTTCAATCGAATGATATTGCATGTTGCTGGAATCCATTCTGTAGATTCAAGTAAAACA   | 30546 | A_95_P284743 DW003998     |
| 31416 | 370 | 51 | 1019 | TTGGTGTGTTTCGGAACCAACCTTAATGTTGGTGAATTTCTACTTTTCTTTGGGTG     | 30550 | A_95_P011131 TA15696_4097 |
| 31419 | 370 | 54 | 722  | TTCATGGTTTGAAGTGAAGAATCTTCGCCAGTACTCTTTATGGCCTATATTCCAATC    | 30556 | A_95_P192107 EB451025     |
| 31427 | 370 | 62 | 527  | ATAATCTGGAGCTTGCTGTTAATCTTGCCAAACAGAGGAAACCTTCCTGGAGCTCGA(   | 30572 | A_95_P045211 BP131076     |
| 31428 | 370 | 63 | 958  | GGCATTACCTTGTGCCGCCGATCACCTGATCATTCCAATATTCTTTGTTTCTTTTAT    | 30574 | A_95_P010531 Z82982       |
| 31436 | 370 | 71 | 722  | TTTTACTAAACTTTTGACAAGCCAGCACCATCGCACCTTGACTGGCAAGTTGGGACAT   | 30590 | A_95_P215452 TA20489_4097 |
| 31437 | 370 | 72 | 433  | TGGATATTTCCCTTAACTATTGATGTCAACTAAACGGGGGGATTGAAGGGAATTTTC    | 30592 | A_95_P030161 TC74155      |
| 31438 | 370 | 73 | 367  | TGGTTGGTGTGCTGGCACTTGGGCTTGTTCATCTGCCTAAACTTTTGAACAATTGGA    | 30594 | A_95_P111127 CV020067     |
| 31439 | 370 | 74 | 779  | TGTTATGCAGGTTGAATACATACGACAAGTGTCTCATAACATACTTCACATGCCTAAA   | 30596 | A_95_P214857 TA20354_4097 |
| 31441 | 370 | 76 | 690  | GTTTATTCTGTAACCAAATCTGGTAATTTTACAGTCAGACAGACTTGGGACGCTTTTG   | 30600 | A_95_P156832 EH614825     |
| 31443 | 370 | 78 | 422  | CAGCAGCAACTACTCCTAGATCACCTTCTATGTACCTTATTATGGGGCTTTTCTGGTC   | 30604 | A_95_P089888 BP530698     |

|       |     |    |      |                                                             |       |              |              |
|-------|-----|----|------|-------------------------------------------------------------|-------|--------------|--------------|
| 31447 | 370 | 82 | 571  | TATGAAGGGTGTGCCCTTTTGTATTATTGGAAGGGGCATGGATTTTGCTCACGGTTA/  | 30612 | A_95_P132442 | EB432923     |
| 31450 | 370 | 85 | 748  | GAGTCCTAAAAAATTGCTTGTTCACAGTTTCAGTTAGATTCTGTGTTCTCTCAAGG/   | 30618 | A_95_P177742 | TA12061_4097 |
| 31465 | 371 | 15 | 902  | CTGCAATTCTTATCTTATACGGTCTACCTAGGTTGTTGACTGGGTCAATTCTTGCGCAI | 30647 | A_95_P020826 | EB682391     |
| 31467 | 371 | 17 | 875  | ATCTACTGGCATGAGCTGGTATAATACCCCGTGATACGGGAAGTGCTGACCATAAA    | 30651 | A_95_P022121 | DV999868     |
| 31469 | 371 | 19 | 754  | TTAGAGCTTAAAGGTAATAAATTTGTTTTGGAGAGTTTCTGGAGTTCAAAGGGGACA   | 30655 | A_95_P161367 | EH620115     |
| 31470 | 371 | 20 | 643  | TCTTTGGTAAGGGACACCATAGCTGCCTGTAGTATGGTTTCAGATTTTCAAATGGATTT | 30657 | A_95_P015276 | EB426417     |
| 31474 | 371 | 24 | 339  | CTCACAAATGGCGTACCTTCTCTCTCGATAACACTAAAAAATTGGCCCAGAGTACAGC  | 30664 | A_95_P113732 | CV021284     |
| 31475 | 371 | 25 | 705  | ATTATATCGAAGTCCAGGACCTGGTGAACCACCATTTGTGAAGGTTGGTGACAAAGT   | 30666 | A_95_P150277 | EB680370     |
| 31476 | 371 | 26 | 72   | GGTGTGCACAATCGATTACATACATGATTTTACTGTTCTGTTGGAATTAATCTTGCTI  | 30668 | A_95_P146027 | EB449862     |
| 31479 | 371 | 29 | 722  | AATGCAAACCTCATGAATTTTTGCTTATATCCATCTCAAATGTCGATTGAGGGACTGGT | 30674 | A_95_P179932 | TA12619_4097 |
| 31480 | 371 | 30 | 1130 | ATATGTCTCTGACACTGATTAATATCTGTAGTCTGGTTGCTGCAAGCCCTCAACGAC   | 30676 | A_95_P243327 | TC50283      |
| 31483 | 371 | 33 | 484  | CTTCTTGAAGATAGTCCTTTTCTGGTTGTTTTCTATATAAATTTGCAACCTCTGGTC   | 30682 | A_95_P208252 | TA18927_4097 |
| 31485 | 371 | 35 | 837  | GCTGTATATCTAGTCAAGTATGTGGGACAAATTGGGTTAAATGTATTCATGCAGGAA   | 30686 | A_95_P184147 | EB679701     |
| 31486 | 371 | 36 | 427  | AGTGAACACAGTAAAGCTAAAAGGAGCAAATGATTGGCTGGTTCTTTATACTCATCTI  | 30688 | A_95_P306788 | FG636272     |
| 31487 | 371 | 37 | 594  | TTTGCTACCTAACTCGATGAAAGTAGATACCAGGCAAAGTATGTTTTAATCACAGGA1  | 30690 | A_95_P143627 | EB446869     |
| 31492 | 371 | 42 | 838  | TACGTGGGGTTTTTTGGTACTAAAGTGTTAAAAGGAGCACAGAATTCTTAGAATTTT(  | 30700 | A_95_P232649 | DW004645     |
| 31494 | 371 | 44 | 668  | GATGATATGTTGAAGATGGAGAAGATCACTATTTATGTTGAACACCCCGCCCTATT(   | 30704 | A_95_P137052 | EB440796     |
| 31495 | 371 | 45 | 407  | TGGAGCTGATTTATGTGGAGGATCTTTTTGCTGTAGATGGATAACAATTTCTTGAGA/  | 30706 | A_95_P096378 | BP533598     |
| 31499 | 371 | 49 | 845  | CTTTTCGTGTGTGCAGAAAGAAGATGAGCTTGTCCAAGTGAATTGTGAGTCGATCGC   | 30714 | A_95_P259511 | TC41276      |
| 31509 | 371 | 59 | 781  | GGAGATTTGAAGCATTCTTCACTGTGAAGATTTGAAGAAGTCAAGATAACTTCATTT   | 30733 | A_95_P291753 | EB424775     |
| 31516 | 371 | 66 | 1213 | CTAAGTTTTAATGTTTGATTTGGAGGTAGATGCTATACTTCAAGTAATTGGAGTCGGC  | 30746 | A_95_P205818 | AY319648     |
| 31522 | 371 | 72 | 529  | CTGCTAGAGATTGTTCAAGTAATTTGAGTGCATTTTTGTCTTTGTATCCCAAATGCAA/ | 30757 | A_95_P248552 | DW002693     |
| 31528 | 371 | 78 | 458  | CACGAAACTAGTCGTGTAGGTGTGTACCATATACTCTATGTGCTATTTAATTGAAAG   | 30769 | A_95_P127602 | EB427139     |
| 31529 | 371 | 79 | 674  | CTGCCAAGCATTTTGTATACGTAACCTTTGTAGTTTACTTTTGCCCTTTGTTGTAGTT( | 30771 | A_95_P226254 | EB439183     |
| 31536 | 372 | 1  | 757  | GTTGTCTTTTTAGTTTTCTTTGTCTTGAATAATGGGACATTAAGCCAGCTACAGTTCA  | 30620 | A_95_P127132 | EB426581     |
| 31537 | 372 | 2  | 683  | TTGGCGTTTATTACGTGGCACCCGAGACAATGACCAACTTTGAGCCTCTGCATAAGTTA | 30622 | A_95_P139327 | FG145736     |
| 31538 | 372 | 3  | 366  | AAGAAGAAAGAGGAATCTGATGATGACATGGGTTTCAGTCTCTTCGATTAGAGGAA    | 30624 | A_95_P107222 | CV018266     |
| 31540 | 372 | 5  | 412  | AAAGAATTCAGAGCCCGGAGTTGTCTCATTTTCCAGCTGTTCCCTTGAGCGTATTTTA/ | 30628 | A_95_P005926 | FG639375     |
| 31550 | 372 | 15 | 864  | TACTTCTTTGACTGTTGTTGGCGAGGCTGTTACGGATGACATTGGAACAATTCGGAT(  | 30648 | A_95_P292298 | EB428006     |
| 31562 | 372 | 27 | 742  | ATTATAATAGGTAATAATAATTTCTCTCTCTTCTATCTTCTCCCGGCGGTAATGGC(   | 30671 | A_95_P119992 | DV999623     |
| 31565 | 372 | 30 | 829  | TGTCCATATCTGTAGAATGTACTCGAGAAGTGTGTCTCAAGCTAACTCTTCGACA     | 30677 | A_95_P011856 | TA16924_4097 |
| 31569 | 372 | 34 | 170  | ACTGCAAACCTTATATAGCAGCTTCTATCATTTGTGTGCTTCTATGGATTGATTGCACA | 30685 | A_95_P106212 | CV017805     |
| 31570 | 372 | 35 | 825  | AAGGAAATGGTGGCATGGTTAGAGATGCAGTAGACCATATTGGACTACGCACAATG    | 30687 | A_95_P128347 | EB428011     |
| 31573 | 372 | 38 | 379  | TTCAACTGTTGCCGGAGCTTAAAACGCATATTATTTTGGTAAAACAGAAGTTTTGACA  | 30693 | A_95_P179077 | TA12422_4097 |

|       |     |    |      |                                                             |       |              |              |
|-------|-----|----|------|-------------------------------------------------------------|-------|--------------|--------------|
| 31576 | 372 | 41 | 494  | AAGGAGCTCTTCTCCAGAAGCTGGTGACCTGAAACGCTATGCTATACATTATGATAG   | 30699 | A_95_P026811 | FG138693     |
| 31579 | 372 | 44 | 744  | TTCTTTCCCTGGAGTGACTGACCAGTGGTTTGCATGGCTATTTTCGCATCTAGTCTG   | 30705 | A_95_P294743 | FG148973     |
| 31581 | 372 | 46 | 425  | TGCGAGAGTCAATATGCATTTACTGGAATCATCTTTCATCTTTGGTACATTTAAGGTG  | 30709 | A_95_P046671 | BP131458     |
| 31585 | 372 | 50 | 754  | GTAGTTGCATATTTGAATAGAAAGTGATGTAGCGGATAATAAGCAGGCTATAGCCAAC  | 30717 | A_95_P015531 | EB677896     |
| 31588 | 372 | 53 | 164  | GATGATGATGATGACAAAGATGATGATGATGATACTGAAGAACTCGGAGATGGTAG    | 30723 | A_95_P139622 | TA12746_4097 |
| 31596 | 372 | 61 | 332  | TAGTCTACTGGAAGAAGGATCCACTGTAGGCAAGAGAAATATCTTGAAACAGAAAC/   | 30738 | A_95_P093493 | BP532289     |
| 31600 | 372 | 65 | 434  | AAGGAAAAACATGTCTGCTGCTGCTGCTATATTGTGCGGGAAGAGATCGAACTATTT   | 30745 | A_95_P125817 | FG150715     |
| 31609 | 372 | 74 | 246  | GTTCCATCTTAGATGGTAATAAATTTGAGTATAGCACCATTGAACGGTGTTCAGCT    | 30762 | A_95_P159112 | EH617069     |
| 31620 | 372 | 85 | 1656 | CTCTGGCAGGTGGCTTCGATACATAGTTACAGGTTCTTTCCCTCAAGGCTAGGTTTTAA | 30784 | A_95_P024956 | AM851010     |
| 31621 | 373 | 1  | 901  | ATGTAATGTATTTAGAATTGGAAAGTGAACGTTCTTTTAAAGCCATTGGAGCCTCTG   | 30785 | A_95_P248782 | TA14366_4097 |
| 31626 | 373 | 6  | 283  | ATGATGGCTTGCTTTGACACAGAATTCTAGGGTTATAGCTTGAGGAAAGGATTATAA   | 30793 | A_95_P059041 | BP134633     |
| 31632 | 373 | 12 | 480  | AGAATGGTTTGATACAAAAAGTCAAGAGAGAAAAATTTGGACCTTTGAATGGCAGGT/  | 30805 | A_95_P232164 | BP128741     |
| 31633 | 373 | 13 | 77   | AATGGGGATATATTCAAAGCCGAGGTGCCCAGTGTTCCGGTCAGGACACCTATTATAA  | 30807 | A_95_P049736 | BP132236     |
| 31643 | 373 | 23 | 461  | GTCGGTATAGCTAAGGTACTTTAATTTCTGTAGCTAAGGTCTGGATATTGTAATACCT  | 30826 | A_95_P109487 | CV019336     |
| 31645 | 373 | 25 | 816  | TCTTCATTGAAGACTGATGTGGGTGATGCCAGTGAATGCTCCTCATCTGGTGCTTTAC  | 30830 | A_95_P138287 | EB442026     |
| 31646 | 373 | 26 | 840  | TTTTCCGTTTGCTGCCAGATCTCCAAGCCAATTTGGCGCTATCCGATTTCAATTTCTC  | 30832 | A_95_P246642 | EB682809     |
| 31647 | 373 | 27 | 652  | ACATATGAGGGACAGTTCGAGATCCTGTCTCTTTCTGGTTACTTTCTTCTCTCGGAATC | 30834 | A_95_P286708 | FG186048     |
| 31656 | 373 | 36 | 655  | TCCCAAACCTGAAGTATATTGTACATTTGAAAGCTGCATGGAGTTGTGGCTTTTTGA   | 30850 | A_95_P307753 | FG641732     |
| 31660 | 373 | 40 | 582  | GAGTTATGTTTCAAATTGGAATCAGAAATGAAAAAGTGGGCTCTACCCACGCCCCAC   | 30858 | A_95_P085025 | TA19965_4097 |
| 31661 | 373 | 41 | 1604 | GATGTATTTGTAGTTCACTGTTCTATAAATGGATTGTTTTGAGTCGAGGGTCCCCC    | 30860 | A_95_P237524 | D31964       |
| 31662 | 373 | 42 | 498  | GAATTGTCTACCTGTAGGCTCGTGAAGAACTATTCGGTGCATCAACTTATTCTCTATG  | 30862 | A_95_P301853 | FG637079     |
| 31665 | 373 | 45 | 344  | TTTGTGGGTATCTGCAAGGATTTCTTGCAAAATAGGTCACCTTTGTGCAAATCTGG    | 30867 | A_95_P160672 | EH619345     |
| 31669 | 373 | 49 | 413  | TGCCATAAACCTTACCAGCTTCTCAATCACTAGATTGTATATGACTTTTGAATCAACA  | 30875 | A_95_P158817 | EH616714     |
| 31670 | 373 | 50 | 55   | CTAGGTGATTTCTTCTGTCTATCCAAGCCTTGGTAGATAGAGTTACCTGGTACCTGT   | 30877 | A_95_P092658 | BP531915     |
| 31671 | 373 | 51 | 622  | CTGTAGCTTTCTTGGTTCTAAACATATTCAAGGATTGTGGTTTTTTGCTGGTTCTTA   | 30879 | A_95_P288233 | FG641165     |
| 31673 | 373 | 53 | 366  | GTTAGGAGTCGTGTGATGCTAGACCTCATGTGAAGGATTGGTGTGCTGAATATTTTG   | 30883 | A_95_P051156 | BP132576     |
| 31674 | 373 | 54 | 405  | AGAGATAATGGCCTCTTGCATCTTATTTTCTCACTTCCCGTTGCCATAGAAAAGATCA/ | 30885 | A_95_P130532 | EB430579     |
| 31677 | 373 | 57 | 327  | GCTGTTGAAGTTGTACCGACATAATTTTGAGAAAGTGAGCCTTTTTCTTTTTCTTGAT  | 30891 | A_95_P034184 | AJ718259     |
| 31678 | 373 | 58 | 470  | AAGGAGCTTAGCTAGCGCCAGAAAATGTTTTACTAGTAGCATATTTGTACCTGTTAT   | 30893 | A_95_P099843 | BP535089     |
| 31681 | 373 | 61 | 867  | GGATTGGACTTCTTTGGAGTCTACTTACAGAGGCCGAGAAAACAGGTTTATCAAGAAA  | 30899 | A_95_P235679 | EB678129     |
| 31682 | 373 | 62 | 1364 | GCTTGTGAGGATGGTTTTAATGCTTCAGCTGATTTATCAGTTGTTTTAGGATATCTC/  | 30901 | A_95_P179377 | TA12492_4097 |
| 31684 | 373 | 64 | 394  | TTCTCAAATCCTATCTAGAAATGGGCCAAAAGTCTGACATGAGTGTGGATGAATC     | 30905 | A_95_P100403 | BP535349     |
| 31687 | 373 | 67 | 561  | AAGTATACGGCAAATTGCGTCCAACCTTTATTATTGCAGCTGTTCCAGGTGATAAGACA | 30911 | A_95_P159212 | EH617174     |
| 31690 | 373 | 70 | 1407 | GACTCATTAATTTGCAGGGAATAAGAGTTTAACTCTGTAATGCTTCTTGCTGTTCAAT  | 30917 | A_95_P014071 | X96727       |

|       |     |    |      |                                                             |       |              |              |
|-------|-----|----|------|-------------------------------------------------------------|-------|--------------|--------------|
| 31692 | 373 | 72 | 2584 | TTGCACCTATGAACACCTCACACGCTGCTGTTTTCTCATATATTGTACGTTGCTTGCT  | 30921 | A_95_P027236 | AB124647     |
| 31695 | 373 | 75 | 279  | CTTTGTAATCGACTATTGTACAATATCTTTGAACCAGAGATAAAGAAGCGACGGTTTC  | 30927 | A_95_P029241 | FG623741     |
| 31697 | 373 | 77 | 789  | CTGAATTATTTCTGTCTGTTCTTCTTATGTATAGATTTCTGGTGTTCATGGTGGTA    | 30931 | A_95_P270971 | EB438297     |
| 31699 | 373 | 79 | 1096 | ACAGTACCAACCCAAAGCTTATGACTGAATCTCGAATCATGCGTATAGCTAGGGGAT   | 30935 | A_95_P220692 | TA21661_4097 |
| 31700 | 373 | 80 | 446  | ATCTGTGAACTTGTATGTGAGACTGGGCAGTAGTGAAGTGGATGGTTTTAATTCTG    | 30937 | A_95_P232589 | CV019600     |
| 31701 | 373 | 81 | 851  | GCTGAACCTGTACAAGCTAGCACGTCGTTTAACTCTGAAGAAGCTGATGATAATAGA   | 30939 | A_95_P241360 | DV158562     |
| 31702 | 373 | 82 | 1148 | CGGTGAAAGGCATATATTAGAAGAATCAAATGTTTTCCGATGCTAGAAATTGGAGTT   | 30941 | A_95_P182572 | TA13249_4097 |
| 31705 | 373 | 85 | 1734 | CACACAACAGTGGAAAAGTTTCAATGTATGTAAACGCAAACAGTGTTAACGTTGGTT   | 30947 | A_95_P181362 | TA12960_4097 |
| 31708 | 374 | 3  | 884  | CTTCTCAGTTTCTGCAAGTGGGTTATCGTCTAATACCCTATTTTATATTTAATGCTGA  | 30788 | A_95_P233709 | DV162246     |
| 31709 | 374 | 4  | 333  | AAGGGTGGAAATTGGACGTTATTGGGAATAATTCGTCAAAGGATTCTTTTTAAACCA   | 30790 | A_95_P075010 | FG635003     |
| 31713 | 374 | 8  | 793  | CGTTGTACACAAATCCAATTGTTGACCTTGGGATCCAGCTTAGTTTCCGCTGTCTTTT  | 30798 | A_95_P234939 | EB439485     |
| 31716 | 374 | 11 | 516  | GATTAGTACGGTCTGTGTGATCCATTTCTTAAAGCTGGTATACAGATGCTTTTCACT/  | 30804 | A_95_P021666 | EH621297     |
| 31722 | 374 | 17 | 458  | GTTTGACCCCTTAGCTTGATGTATTTGTAGTCTGTACAAGTCATTACAATGTCCAATT  | 30816 | A_95_P006451 | CV020183     |
| 31723 | 374 | 18 | 782  | CTTTGGTTAACTCAAGTTCCAGCGGCACTGGTGAAGATTGATTGGAATATTTGATT(   | 30818 | A_95_P116267 | DV158893     |
| 31725 | 374 | 20 | 642  | AGATTGAACTTTGTAATTGTAACCTCATCTTTTGAGTGATACTGCTGCCTATGACAGT( | 30821 | A_95_P018516 | TA12434_4097 |
| 31728 | 374 | 23 | 617  | CTATTGAAGTCTTGCTTCTTGTTTCGGAAGAATTAAGAATAAGCATTGTGTAATCGGAT | 30827 | A_95_P300533 | FG635390     |
| 31731 | 374 | 26 | 429  | TTTGATTCTCAACCAACTCTCTTTTCAGAGAGATGATTGTTGACTTCAACTATTC     | 30833 | A_95_P114312 | CV021536     |
| 31739 | 374 | 34 | 506  | TTATTAACGGTAGGGGTTGATCTGGACGAAAAGTATAACGGGGGACAAATGTAAT.    | 30847 | A_95_P080430 | BP528001     |
| 31740 | 374 | 35 | 729  | AAAGATAAAACAACCGAAAGCAGAACGACCTGCTGGTGGAAAGGCGTGAAAGTAAAG(  | 30849 | A_95_P127727 | EB427300     |
| 31743 | 374 | 38 | 241  | TGAGATGAGGAAAATTATGCTGGCGATCGCCGATAGACTTGGATCATCGCCGATTC    | 30855 | A_95_P066990 | BP136744     |
| 31744 | 374 | 39 | 655  | TGACTTCCAATGCAGTCTCGTTCGTTACAATCCCACTTGTTCCTTAATGTGAAGAACTT | 30857 | A_95_P288038 | FG186133     |
| 31749 | 374 | 44 | 676  | TGGAGAAATTGGAAGCATCTGGGCTTCTAATCTATTTGGTGAAAGGGATATGAAA     | 30866 | A_95_P158162 | EH616240     |
| 31751 | 374 | 46 | 608  | TTATTTCTGTTGGTGAAATGGAATGCATGGGGTGCTGTGTAATGCTCCAATGATG/    | 30870 | A_95_P110187 | DV162733     |
| 31754 | 374 | 49 | 241  | GATTTCTGGTTAACACTTGACACTAGTGAAGAGCAGCTGGCACTTCTCTACCTTGCG   | 30876 | A_95_P147857 | EB643473     |
| 31755 | 374 | 50 | 839  | TTGCTCCATGGCGGTGAAGCTGATTCTTTGGATTATTGGTGAATAATGCTGCCTTGT,  | 30878 | A_95_P021811 | DV159434     |
| 31757 | 374 | 52 | 399  | AGTTGGAACCTGTTAGATCTTGTTAGGTGTTCTCTATTATCAATCAATGAAACCTCTT  | 30882 | A_95_P000671 | FG627136     |
| 31759 | 374 | 54 | 36   | CAACCCAGCAAATTGAAGAAGAACTGTTAACGTGGACGAGGAGTTGCATTTTCCCGT   | 30886 | A_95_P074960 | FG136839     |
| 31760 | 374 | 55 | 743  | GCATCGGAAGAATGGTCAATTTGCATCTTTGAAAGCAAGTCTGGATCTTCTAGCTG(   | 30888 | A_95_P137787 | FG136761     |
| 31764 | 374 | 59 | 497  | GTATAGTCTAGAATATCCCCATTGTGTTCTTAGAATGATCATTGGAAGTTGTTGTATG  | 30896 | A_95_P019981 | TA17904_4097 |
| 31766 | 374 | 61 | 830  | TGTAAGATGTGTTACATACAGAACCATGCCCTGATCTTTGTTGTCATACATGTGAAA   | 30900 | A_95_P146937 | EB451107     |
| 31771 | 374 | 66 | 438  | ACTCTGTACAGAATTCCTGTGAATTCGCAAATTCGATTGCTAATCCTTTTTGTACGTT  | 30910 | A_95_P095323 | BP533128     |
| 31774 | 374 | 69 | 759  | GCTCTTATTCTGGACTCTTAAACATTTTCAGGAGACATGAAACTATCTTATTTTCTGGG | 30916 | A_95_P028246 | EB449088     |
| 31775 | 374 | 70 | 392  | GTTTCAGCTTTGGGCATTGCATGTATCAACAAGCTAAACATGCTAATGGATTTAGTTAT | 30918 | A_95_P130612 | EB430661     |
| 31777 | 374 | 72 | 597  | CTTTATTGTTGTTAGGGATAATTCGCACCTTTGTGGTTTGAACCTTATTGTTGGTC    | 30922 | A_95_P213857 | TA20137_4097 |



|       |     |    |      |                                                            |       |                           |
|-------|-----|----|------|------------------------------------------------------------|-------|---------------------------|
| 31781 | 374 | 76 | 827  | GTTTTGACGAAGTTATTGCTGAGGATCGAACTGAACAGTTCATTAATGTTCTCCAAA  | 30930 | A_95_P016056 DV160265     |
| 31782 | 374 | 77 | 32   | CTTGCACCATAACCCAGCTGGCACAAATTCCTATGAAAAAATATGATTTAACTTTCC  | 30932 | A_95_P003426 DW000536     |
| 31784 | 374 | 79 | 443  | GTGCTGTTGCTGCTTTACCGCTTAAGGTTTGCTTTTAATTAATTGCGCCTTTGAGTTT | 30936 | A_95_P005836 BP535069     |
| 31786 | 374 | 81 | 1064 | TGTTGCTGCCAAATCCGGAGTGAAGCTAGAAATCCAGATGGTGTGTGATTGCAAA    | 30940 | A_95_P250107 AB055502     |
| 31791 | 375 | 1  | 324  | TGAAGTTGAAGGGGAGAAAAGATTTGCTATCGCGCAAGAATTCTCTGATAGCCTTC   | 30949 | A_95_P103377 CV016479     |
| 31799 | 375 | 9  | 814  | AGATGTATTCTGCTGGTGTGTGATGATCAAAGCTGTGAACTGTTGTGAGGCTGGTT   | 30965 | A_95_P246667 FG153643     |
| 31800 | 375 | 10 | 1213 | CTGCAGAGATGGCCTATTACAAGCAATGGGAATTGATCCCCCTAATTCTACAAC     | 30967 | A_95_P015406 TA16293_4097 |
| 31802 | 375 | 12 | 301  | GGTCTTGGCAGCCTTCTATTCATTTTCGGCAGCTCTTTGAACTTATATTCTAGCTAG  | 30971 | A_95_P105117 CV017301     |
| 31804 | 375 | 14 | 586  | TGAAGGCAGGCGAGTCAAGTATGGAACCCAGAAAATGCAACAACAGCGAGAAAAC    | 30975 | A_95_P138942 EB442648     |
| 31805 | 375 | 15 | 451  | CAAAGTGAATGCCTCAAGCTTCTCTTATTTCTTCTTGATACTGTACCTGTATATA    | 30977 | A_95_P202742 TA17700_4097 |
| 31809 | 375 | 19 | 844  | CTAAACGTTCCATTCTATGTGGTGAGACATGAATTTGCTTTTGATATGTTTGCATTAC | 30985 | A_95_P247132 EB438736     |
| 31813 | 375 | 23 | 513  | AAATTCTTGCTCGAACAGGTAATCTTCTTACTCTAGTATTTATTCTAACTCCCGTCCA | 30993 | A_95_P022341 EB443868     |
| 31818 | 375 | 28 | 458  | TAAGGAGAAGGAAATAGAGCCAATAAACTCCTGCATCCTCAACAACTGACCGTCCCTG | 31002 | A_95_P050371 BP132380     |
| 31822 | 375 | 32 | 891  | CCTTTGAGGGCTTCAGTCTATTTAGAACGTATTTCAAGGCTGAAACTGTTGTATGGA  | 31010 | A_95_P186542 DV158658     |
| 31823 | 375 | 33 | 288  | GCTCATTGATATCAGGATAGATTAACCAATACATTTGCTTTTGCTTGCCTTTATTCAA | 31012 | A_95_P029406 BP526310     |
| 31827 | 375 | 37 | 715  | GCGAATTAGTTTCTTACCCTCGCATAAGCCAAATACTGATCTGGCACCTACAGTTCC  | 31020 | A_95_P162332 EH621270     |
| 31835 | 375 | 45 | 385  | TTGCCGGGATTGTTTATTGTTGTATCTCCATGAGTTTGAACAACATTTCTGCTTTGT  | 31036 | A_95_P142782 EB446216     |
| 31836 | 375 | 46 | 1549 | AATTTACCGAAGCTTTTTAACCGAGGAACTTTGCCAAGTTGCCACTGCCTTGACGCT  | 31038 | A_95_P008371 AJ438263     |
| 31840 | 375 | 50 | 80   | AGGATTCCAGATGTCACCAGCCATGATCAGAGGACTACTTTTTCTCTCGTTATCAC   | 31046 | A_95_P255384 EH614588     |
| 31841 | 375 | 51 | 1168 | CTCCTAATAAGGGAAAATGTGAGTCAAGTTTAGAAGAAGTCTACTGTGAGGCAATA   | 31048 | A_95_P194907 TA16004_4097 |
| 31843 | 375 | 53 | 705  | TTAATGTGATCTCTGTATGTTGTGTGTACTCACTCACTCATAATGTAATGTCTTT    | 31052 | A_95_P159067 EH617014     |
| 31845 | 375 | 55 | 368  | GGTGCCAGACACCCTGTCAGGCAAGCCAACAATAATTTATTAATTTGGTTCTCTTTT  | 31056 | A_95_P087853 BP529898     |
| 31846 | 375 | 56 | 522  | TACGGTCTGTGTGATCCATTTTCTAAAGCTGGTATACAGATGCTTTTCACTAGTTCA  | 31057 | A_95_P253899 EH621297     |
| 31848 | 375 | 58 | 572  | CCTATGGCGAACAATACTTTGAAACTGATTTGTTGAGGTTATTACCTTTACACTAT   | 31061 | A_95_P125247 FG634396     |
| 31849 | 375 | 59 | 334  | AAGCATATTGCTCAATGAGACATGCTTCTTTAACTGTGGATCAAATATTCTCAGA    | 31063 | A_95_P212007 TA19737_4097 |
| 31850 | 375 | 60 | 810  | CTTATGTGTCAAACCTGGTTGTCTTGTGGGGTCCCTGCTTTTTTCGGGCAGTGCA    | 31065 | A_95_P296183 EB450578     |
| 31852 | 375 | 62 | 309  | GGTCGCGGTTCTGCACATTTTTTGGAGTCAAAGCTATCAAACAATTGAATTTAGACT  | 31069 | A_95_P213877 TA20141_4097 |
| 31855 | 375 | 65 | 855  | AGGAGAGAACTCCATTGCTATTGAGATTGGTTATTGCTGTTTTCCCGTTCATGGGA   | 31075 | A_95_P228644 DW000428     |
| 31856 | 375 | 66 | 614  | GACATGTCCACTGCATATTGGCACTAACATTTCTTTAGTTAGTATTTGTTGAAAGCAA | 31077 | A_95_P047596 BP131697     |
| 31860 | 375 | 70 | 597  | TCGAGACTCAATAAGATAGCTTCTTGTGGTGCTTTGCAACTTTTAATATTAACCGC   | 31085 | A_95_P142272 EB445781     |
| 31861 | 375 | 71 | 858  | AAGGTGCACTTAATATCACTCTGGATGGAGTTTACCATTCCCCTGTTGGCTCTGATGA | 31087 | A_95_P187972 EB679931     |
| 31869 | 375 | 79 | 600  | TTGGTGATTGGAGGATAGTTCAATCAGGACACAAGTGTGGATTTCTTTGATGACTT   | 31103 | A_95_P090358 BP530921     |
| 31872 | 375 | 82 | 1134 | GAGCCATTTAAAGCTCTGTAATACCCTTCTGTATCTTATGTTGTGTCTGTTGGTTTA  | 31109 | A_95_P015541 TA13425_4097 |
| 31874 | 375 | 84 | 787  | GGCAAGAAGACCTTGACTCTTTTGCTTTAAACCACTGTTGCTGATAGATTCATTTA   | 31113 | A_95_P016751 DV158928     |

|       |     |    |      |                                                              |       |                           |
|-------|-----|----|------|--------------------------------------------------------------|-------|---------------------------|
| 31880 | 376 | 5  | 806  | ACATCATTCTGTACTAAGGAGTCAATCTCAACCCTTGTCAGAGAGAGCACCCGGTAA/   | 30958 | A_95_P225657 FG133389     |
| 31881 | 376 | 6  | 595  | CTGAATATGTGTCTTGTATCTCACTTTGCCTAATTATATTTTCAGACCTGTCGTAATGAT | 30960 | A_95_P263131 FG640232     |
| 31885 | 376 | 10 | 876  | TTAGATTGTGTTCTCTGCAGGCTTATGTTCTGGCATCTTTTATCCGTATGGTGCTTTGC  | 30968 | A_95_P149792 EB679750     |
| 31888 | 376 | 13 | 787  | ACTGCCACCACCAACCTGTTATTAGAAAATCTACTCTGTTGAAATCAAGCTCTATT/    | 30974 | A_95_P127242 EB426760     |
| 31891 | 376 | 16 | 732  | ACGAGATGATCAGTATTATGCTGGTCTTTTGATAGAGTCGGATGAGCACTGTCAATTTI  | 30980 | A_95_P162147 EH621003     |
| 31894 | 376 | 19 | 131  | CCCCTGCTTTTCTAAGTGGAGAACAATTTTTGTGATCCTAATCTTTTGTGTAATTAAG   | 30986 | A_95_P147442 EB451870     |
| 31895 | 376 | 20 | 732  | GTCACTACCTGAAAGACTTAAATATTACAGTTGGATTGGCAGAGCAATACTTCAGTA/   | 30988 | A_95_P145037 EB448579     |
| 31896 | 376 | 21 | 706  | AGATAATTATTCATGTTGATCCGTTTGGGCTCTGTTGCTATTTAGGTTGAACCACAAT   | 30990 | A_95_P293298 FG643559     |
| 31903 | 376 | 28 | 340  | GCATGTAATAAGGACTCAATTTACTCTGGATTGCTTTTCTCCTTTCCACTTGATCATT/  | 31003 | A_95_P088098 BP529960     |
| 31908 | 376 | 33 | 429  | TGATCCCTGCAACTATTTTTGGTGTATGGAACGAGAGGAATAGAAGATGCTTTG/      | 31013 | A_95_P070895 BP525562     |
| 31909 | 376 | 34 | 789  | GGTTTTAATGGGCGCATTTGGTTTTGATGATAATGGACTTTCTATCATATTTAGCGC    | 31015 | A_95_P199882 TA17088_4097 |
| 31912 | 376 | 37 | 143  | CTGTTGAGGCACTTGAGTGTGTTATGCGTGTATTGTTGTGTATGAGATTTGATATTTA   | 31021 | A_95_P100728 BP535498     |
| 31915 | 376 | 40 | 218  | CCCCTTAGCTTAGTTCTCTGCTACCAACAGTAGTATCCCTTTTCTTGTGTTGTATTAGC  | 31027 | A_95_P159917 EH618459     |
| 31923 | 376 | 48 | 2844 | TTCGGCCTTTCCTATGTAATCTCCTGCCCTTTTAAATGCAAGTTGTTTTAGTATGAG`   | 31043 | A_95_P007306 TA12480_4097 |
| 31924 | 376 | 49 | 463  | TTCGACGATTTTCATTGCGGATGCTCTTAGAGGTACTGGATTTTATCAGAAGGCTCAAT  | 31045 | A_95_P199257 TA16956_4097 |
| 31927 | 376 | 52 | 368  | GATTTTTCTTTAACTAGTAGCTGACATCCCGGACTCATAAGAGGAGCCCATGAAAA`    | 31051 | A_95_P107197 CV018256     |
| 31929 | 376 | 54 | 376  | CTATCTTAGCAATCTTAATGATTGGAGTGAAGAACCAGAAAGACCCGCGTGACAGCA    | 31055 | A_95_P189417 EB680583     |
| 31931 | 376 | 56 | 735  | CGGAGTATTTTCATCGTAAAGATAAATGATGGGAAGAGTAGACGTATAACATGCATG(   | 31058 | A_95_P292453 EB427468     |
| 31936 | 376 | 61 | 890  | GAATCTAAATGCAATGAACAAATTGGAAGTGCTGAAGCCCTGGCACTGTCAATTTCT    | 31068 | A_95_P235124 DV998904     |
| 31940 | 376 | 65 | 801  | ACATGATTTTTGTTAGGTGAGAGTCTCATGTGTGGCAACACATCTCAAGTGTGGCT     | 31076 | A_95_P268261 DW000289     |
| 31941 | 376 | 66 | 1773 | CCCTTGGTCTTTTGTTCCTTCAACTGTGATCAAATTTAGGGTTTAAATAAAATGGGGTG` | 31078 | A_95_P012586 AY553216     |
| 31942 | 376 | 67 | 801  | TCTGCAAATTATGCTTTACAAGGACCAATGTCATACAGTACCTTTGCTCAATGCTTTTT  | 31080 | A_95_P216567 TA20734_4097 |
| 31944 | 376 | 69 | 830  | CATATACAGAGGTTTAGGTTAGGTGGAGGTGATGCCACTATTTATGTGACTCAAGTG    | 31084 | A_95_P289173 DV157904     |
| 31946 | 376 | 71 | 2075 | GTTGTAATAGGCTGCACTAACTAGTTTGTAAATCTGAAACCAGAGTGACAAAGGTA     | 31088 | A_95_P017891 AF253511     |
| 31952 | 376 | 77 | 837  | AAAGACTACTTGCGGATGTTATTCCGCCTTGGGATATTGGGGTTACTTTTGTGACCT    | 31100 | A_95_P219852 TA21484_4097 |
| 31953 | 376 | 78 | 136  | CAATAGAACAGCCATAGTTGTTGCTGGCCTACCATGACATACATAGACGTGGTTCTTT   | 31102 | A_95_P051216 BP132591     |
| 31955 | 376 | 80 | 696  | CACGTTTCTTGTGCACCTTAGCAAGTGGAAATATGTTAAATCATCTTGATTTTTGCAC   | 31106 | A_95_P001356 EB679961     |
| 31957 | 376 | 82 | 652  | GGTGATGCAGTTACATGTGATCAGTTTTGATTAAGTTTATATTACGCAGTTGAAGAA/   | 31110 | A_95_P163507 EH622558     |
| 31960 | 376 | 85 | 418  | GATGTCATGGACCAAGATGATGCAGATTCTGGATCAGAAAAGGGAAAGAGCTTCAA     | 31115 | A_95_P164262 EH623408     |
| 31964 | 377 | 4  | 673  | CATATATTGTCGGACTCCAAGCAGAAGCTCTGCAAGGCTTGCAATTATGCCATCAAA/   | 31122 | A_95_P146067 EB449929     |
| 31968 | 377 | 8  | 329  | ACCATCTAAGACTGTTACTAAGCTCAGGCTTGATAAGGACCGTAAATCTTTGAT       | 31130 | A_95_P201929 BP526356     |
| 31969 | 377 | 9  | 539  | TGGATCAGGAAGGTGCTGGCATATGTGTAGTAGGTGCTTAATGTTCTCATTTAGGAC    | 31132 | A_95_P022171 BP534984     |
| 31977 | 377 | 17 | 834  | TAGATACTTTGAGCTACGTTTCAGAATAGAGAGAGCATGCTATTCCAGTGCTAGCCC/   | 31148 | A_95_P244102 FG158775     |
| 31978 | 377 | 18 | 573  | GCTCTCTCTAAAATTGCACTGAACTATCTATGCTATTCTTAAATAGTACACTGGTTCTC  | 31150 | A_95_P248732 EB678067     |

|       |     |    |      |                                                             |       |                           |
|-------|-----|----|------|-------------------------------------------------------------|-------|---------------------------|
| 31981 | 377 | 21 | 716  | GGCGTATTCTGGATCTACTTTGTGTATTTCACTATTCATGATTTGTTTGTTCACACT/  | 31155 | A_95_P287883 FG153402     |
| 31986 | 377 | 26 | 984  | CGGTATATGATACTGGAGAACCTTGAAGGCCTTTCTCTATTTATGAACAGTAAACCTT  | 31165 | A_95_P203327 TA17831_4097 |
| 31993 | 377 | 33 | 337  | CCACCTGAGCTGGAAAACATACCTCTATGCTCTATAATTTGGGTTTTGTAATATTGTTI | 31178 | A_95_P006001 FG626563     |
| 32002 | 377 | 42 | 400  | TTTAATGAAAAAGGACAACCTGTAATTTAAGCTTCGCAACTGTTCTGAGCTATGGGCTI | 31196 | A_95_P164707 EH624005     |
| 32003 | 377 | 43 | 469  | GGCTTGCTCAACTATCTTGTTGCATTGATAGGCTTTTATAAAGGATTCTCTACCATCTC | 31198 | A_95_P023201 TA14829_4097 |
| 32004 | 377 | 44 | 823  | CTAAATTTGGGTGAGAGACTGATTCAGGCCACTGTTAGAGGAGATGTCAGATCTAAT   | 31200 | A_95_P309568 FG133349     |
| 32005 | 377 | 45 | 1991 | CGTCTGTCTCTTTGTAACCTCTGTAATTGACAACATATGCTCTGAGATGTAATAGATC  | 31202 | A_95_P033026 AF223351     |
| 32010 | 377 | 50 | 675  | GGTAGGCATTTCACTAAAAGCTCAGCCTAGAGTTGATCAGCTGATTTACTTTAAATAT  | 31210 | A_95_P197377 DW004157     |
| 32012 | 377 | 52 | 311  | TGCTGCTATCTGCATCCATTAATTTAATATCCCTGCTAAATGGTAGAAAATCCAGTTC/ | 31214 | A_95_P093613 BP532334     |
| 32015 | 377 | 55 | 3534 | TATTCCGACTCTACCAAGCCAATCAATTCCTTGGAAAGGTATCTTGTTGACAATATATC | 31220 | A_95_P283518 AB361628     |
| 32017 | 377 | 57 | 47   | GCTGGGGGTGGATATTGTACAGTCTCCGCTTAATTTTTGAATTAATGTTGATTTATT   | 31224 | A_95_P140307 EB444264     |
| 32022 | 377 | 62 | 1732 | TTAAAAATAACGTGTGAGCATTGCTATTTCAATGGGAATGACAGCAGAGTTGCTTGC   | 31233 | A_95_P025371 TA14706_4097 |
| 32024 | 377 | 64 | 600  | TACATTCGCCAGTATCACAAACATAAATATCAATGTAGCAGTGCAGACTGACAATGGA/ | 31237 | A_95_P155947 TA14223_4097 |
| 32031 | 377 | 71 | 1059 | CAGTGACGTGAATTGATTGATGAAATTTTACGATACTGATGTACCCGGATGTAATTT   | 31250 | A_95_P006851 TA18546_4097 |
| 32034 | 377 | 74 | 467  | ATCTCTAATGGGACACTGTGGCATCTAGGATGAGAAGAATTAATGAAGGAGAAGCT    | 31256 | A_95_P132097 EB432535     |
| 32035 | 377 | 75 | 537  | GTTCTATTGTATCTATTGGATGTGAGAAATGCAGTATTGGAGGGTGTATTAATCTAC   | 31258 | A_95_P089168 BP530373     |
| 32040 | 377 | 80 | 1415 | TAGGGTGTTATATGTTTCGTAATGTACGGCATGCTTAGGACCCAAGTACCTTCAGCCC  | 31268 | A_95_P027466 U66402       |
| 32042 | 377 | 82 | 893  | GGGCACATATGACCGTCAGGATCAGAAGTATATTGCATCAACTCGTCATTACCGTC    | 31272 | A_95_P290208 DV162216     |
| 32044 | 377 | 84 | 849  | CTGTGGCATTGATTCCATACTATTTCTACTTGGTTTTAGCTGTTACAATGTTCTCTGA  | 31276 | A_95_P013451 EB450203     |
| 32045 | 377 | 85 | 578  | TGTGATCCTGAAATGAATTTTGCTTACATGGTTGCGAAAGGAAGTGGCCTGGGTGTT   | 31278 | A_95_P231274 FG644444     |
| 32062 | 378 | 17 | 910  | TTTCGGGGATTTTCAGTTTCTCCATGAATTTTTTGGACATGGAGAAGTGAAAAGGTCTC | 31149 | A_95_P247692 DV999311     |
| 32068 | 378 | 23 | 600  | TTTTGTAGCAACCATTCAATCAGTCAAATGTGCTTTAATCCCAAAGTATTGGGTTGG   | 31160 | A_95_P222077 FG640658     |
| 32075 | 378 | 30 | 739  | GTTTACTCGTCTTTGTCAAGGATATTTGAGCTCTATCAACTTTGATACCAAAGTTTTGC | 31173 | A_95_P088858 TA12020_4097 |
| 32080 | 378 | 35 | 211  | GGCTTCGTTTACCCCTCATGTTACTGTTGATTGATCTGTTACTGTTACTATGTCTCTC  | 31183 | A_95_P106502 FG139571     |
| 32082 | 378 | 37 | 1036 | GCTAGGCTCTGCCATGTTTTCTGGATTTTGTCTTCTGTTACTTTAGAATAATTCAGAT  | 31187 | A_95_P211717 TA19675_4097 |
| 32083 | 378 | 38 | 707  | AATGGGACGGCATGGTGATCATATTGCTTGATTTTCAACCTTATTCTGAAGTTGAACC  | 31189 | A_95_P221737 TA21883_4097 |
| 32085 | 378 | 40 | 494  | TACAGTTCGTGGAAGACTGACTGCCAAGTTATCGAACAAAGAAAGTGACAAATGTGA/  | 31193 | A_95_P264761 BP528728     |
| 32087 | 378 | 42 | 424  | AGTTTGGGAAGTCTATGCCACTTGTGAGTTGGGTTCTTTTGTGAACGAAATTCGAC    | 31197 | A_95_P128002 FG172957     |
| 32094 | 378 | 49 | 574  | TTGCTTGCAATCATTAAAGTAGTTCAATGAGTTCCTCTTTTCAAGTGCTAATACTGTT  | 31209 | A_95_P159532 EH617779     |
| 32095 | 378 | 50 | 270  | GTAGGGGTACCAGAGGGTCTTCTTCTCCTTCTTTATTTATTGTTTTCTGATTTTCTATC | 31211 | A_95_P026431 TA17965_4097 |
| 32096 | 378 | 51 | 712  | CACAGTTCCAGCCCATGTATGTTGAGCATTAGAGCTACATCTTTTCTGTTGCTTCAI   | 31213 | A_95_P293398 FG194591     |
| 32097 | 378 | 52 | 335  | CGATTGTGATGCATGTAGTCTTGGGTTCTTGAATAAATGCTTTTAAATCGGGTAAATGA | 31215 | A_95_P097028 BP533855     |
| 32102 | 378 | 57 | 769  | GCAGTAAATTGTGTTTTTAGGGGGACTTGTTCTAGAATAATAAAGTGTGCGTTAATC   | 31225 | A_95_P115672 DV157993     |
| 32106 | 378 | 61 | 1250 | AAAGGATCCGGCATTGGCAATCCATCTCCACCATTGCCAATAATCAAGGACAAAGT    | 31232 | A_95_P196272 TA16304_4097 |

|       |     |    |      |                                                              |       |                           |
|-------|-----|----|------|--------------------------------------------------------------|-------|---------------------------|
| 32109 | 378 | 64 | 1234 | ACTACTATGCATTACCATCAGAACATTTTTCTATAAATCTACCAGGCGCTCCCGTTTT   | 31238 | A_95_P222477 AY029749     |
| 32113 | 378 | 68 | 282  | ACAGGTGTTGATGATCCAGCCCATCCAAGGTTGTTGCATATTGTTGCAACTTTCAGGC   | 31245 | A_95_P103422 CV016495     |
| 32114 | 378 | 69 | 81   | GGTATTCTGCTAGTTATGGCTTGTTTCATAAGATTGTCTATATTGGGATTTACTGCTTTC | 31247 | A_95_P095963 BP533412     |
| 32116 | 378 | 71 | 835  | TCACACTCTATGTTATTCTGTTGATGCTCATGCCCTCCGGCTATGTCATGTATGAGATCC | 31251 | A_95_P309553 FG133319     |
| 32117 | 378 | 72 | 2111 | GTTGTTTGTAGCCATTTGAATTGCCATTGATGTTCAATTTTTCAGCGTTGTTCAATTGGT | 31253 | A_95_P013436 TA14936_4097 |
| 32128 | 378 | 83 | 743  | TATTATAGAAACAGGAGACCCGGATGCATTTAAACAGTACCTGTGCGGAGACGGACA/   | 31275 | A_95_P194462 EB425633     |
| 32133 | 379 | 3  | 35   | TAAGAGAATATTTGGCATGTTGTACCCAAAGAAGAGCATTGTGTTTGGTGAATCTAC    | 31284 | A_95_P034578 AJ719159     |
| 32140 | 379 | 10 | 691  | GCAATTATGAGATCTGTCAATCTGTTATCTTCTGTAAGTCAAACCTATTATCACTGGA/  | 31297 | A_95_P249872 FG645304     |
| 32143 | 379 | 13 | 661  | CTATAGCAGTCCCGTTGTCCTTACATTTCAAATAACTTCTGAATGTAGTTACTGGTTT   | 31303 | A_95_P268746 DW002885     |
| 32145 | 379 | 15 | 503  | TGCGGGTTCAAATATGTATCTGGTTTTACTGTTGCCTTATCAGGATGTACTTGAAT     | 31307 | A_95_P299203 FG635661     |
| 32147 | 379 | 17 | 730  | TGAGAGAAGTCAAAGTCCACCAACGAATTGCAGCAACCTTCTAATCCTTCTTCAGTG    | 31311 | A_95_P152417 EB682758     |
| 32149 | 379 | 19 | 602  | TGAACATGAGCTGGGCAGTATTTGTCAACCAAGTTGTTGAACTATTACTTTTTGGTC    | 31315 | A_95_P285473 FG636985     |
| 32150 | 379 | 20 | 493  | GAGGGGGGTATGTTTTGATTTGATAAACATGATGCAAACAAAACAGTTTCTCGAGAT    | 31317 | A_95_P029151 TA16757_4097 |
| 32156 | 379 | 26 | 499  | CTTAGTGCTTATTTATTGGCTTCTCCTTATTTAGATGGAGAAGTCTGTGATTCTTT     | 31329 | A_95_P197222 TA16515_4097 |
| 32158 | 379 | 28 | 508  | GAAAGACCAAATGGTCCAAGCAGCAGAGAAAGATCAGATGGTCTTTTAAATTTCCCT    | 31333 | A_95_P118837 DV161906     |
| 32161 | 379 | 31 | 714  | ACTCAACAGTGCTGATGCATTCTGATCTTCGTCCAAATAGGAAGAGTTTTCGGTGCTC   | 31339 | A_95_P221087 TA21747_4097 |
| 32162 | 379 | 32 | 348  | CTACTGATGTCTTGGTAAAAGTATTGGAGCTTGAATTTCCGCAGATATGTATTAATG    | 31341 | A_95_P108342 TA14789_4097 |
| 32163 | 379 | 33 | 184  | ATCAAATGGAAGCAAGTTTCAAGAAAAGTCCCGTAAAAGAAAGACTACTGAGG,       | 31342 | A_95_P087448 BP529800     |
| 32164 | 379 | 34 | 492  | ATGCCATCAGTACTCAGCAGCATAAAAACATTTCTTATCTGTTTCGGTTTATGCATATT  | 31344 | A_95_P132287 FG637879     |
| 32169 | 379 | 39 | 529  | AAGTAGAGTTGCAACGACATGTGTACTGCCTGTGCATCTCACTTGCAGTTTGACAAG    | 31354 | A_95_P134232 EB436351     |
| 32171 | 379 | 41 | 684  | TACTCTGGAGGCTAGTTTGTTCAGATTGTTTTGTAGACCTTTTCTCTCGTTTGGATATC  | 31358 | A_95_P135717 EB439244     |
| 32172 | 379 | 42 | 882  | GATTTGTGTTTAAAGACCATGGAATTGATGTTGATGTATAATATGCATGGGAATGCT    | 31360 | A_95_P181417 EB680718     |
| 32174 | 379 | 44 | 1117 | GTTTCTTGGTTTATTTGATGCTCTGCATTAATACATTGAAAAGGGATTTTGGTTCTG    | 31363 | A_95_P007636 AB025029     |
| 32175 | 379 | 45 | 789  | TAAATGTGAGACAGCAGCATATGTTGGAATATTATGTTTTATGTTATAATGGGTGTG    | 31365 | A_95_P196352 EB447150     |
| 32179 | 379 | 49 | 698  | AATGTCGTACCTACAAGCAAAGAGTGGGTACACCCTTGTAACTCGACTACGGATGAA    | 31373 | A_95_P298878 TC73380      |
| 32184 | 379 | 54 | 758  | TACATTTGACTTGAAGCACTGCAGATGTTGGGACAGGTGGCTCAATGGATTTCTC      | 31383 | A_95_P305468 FG186405     |
| 32185 | 379 | 55 | 868  | AATTTCAACAATCATTGGAATAGTCCATCTGTTCCAGTGAGATGCCCGCTTATGCTT    | 31385 | A_95_P150042 EB680100     |
| 32190 | 379 | 60 | 768  | TTTTGGCATAGGACCGCGAATTTACATCTTACCGGTGAGTGATTCCAATTGTCATTCT   | 31395 | A_95_P096663 EB681743     |
| 32193 | 379 | 63 | 337  | CTTTTTGGGATATGTATATGCGTACAATTACAATGCACAATTGAAGTGTGCGGGTAG    | 31401 | A_95_P132282 EB432743     |
| 32198 | 379 | 68 | 0    | CCATTCTGTACTTCTGTATGATACTGTGTGGATCGGAGCTGATCATGTATGCTG       | 31411 | A_95_P258411 A_95_P258411 |
| 32199 | 379 | 69 | 513  | CTTGAAGCTTAACGCTCCTAGTAATCTGCTGGAGTCAGTTATGTAACAAGTGTGTTGC   | 31413 | A_95_P037018 BP128888     |
| 32200 | 379 | 70 | 212  | GCCGTCGGTGCTATGGTAGCAGGTATATTTGGCATGAACTTAAGATCCTATCTAGAG    | 31415 | A_95_P038301 BP129237     |
| 32202 | 379 | 72 | 595  | CAGAGCTAATATCTGTTTGTGCTCTGGATTGAAACTTGAATCCAAGGATGTATCAT     | 31419 | A_95_P133967 EB435682     |
| 32204 | 379 | 74 | 544  | TTTGGACAATTTCTCGTCTCGCTTGCAACTGGAGCAATTTGTGGTTTGAATGTATAA    | 31423 | A_95_P288714 FG635017     |

|       |     |    |      |                                                              |       |                           |
|-------|-----|----|------|--------------------------------------------------------------|-------|---------------------------|
| 32205 | 379 | 75 | 866  | AAACAGCAACTTTGAGATGCTACTGTTATTTGCTGAGTTCGTTGAACATCTGCATTAT   | 31425 | A_95_P185667 DV157557     |
| 32207 | 379 | 77 | 254  | CGCTCAATCAGCAACTACTGCTTACATTTTCTTAGTGGTTTCATCCACCGTACAAGTCA  | 31429 | A_95_P103227 CV016408     |
| 32208 | 379 | 78 | 810  | TGCTGAAAAGCTGGAGCAAGCTGAAAATCAACTGTCTCATTACGTTTTGGCCCTTA     | 31431 | A_95_P126627 EB425942     |
| 32215 | 379 | 85 | 698  | GGCGATACTAGGCTTCACAAAGATGTTCACTTGTAAATTGTGACTAGTTGGAAAACAT   | 31444 | A_95_P019616 DV999689     |
| 32219 | 380 | 4  | 825  | TTTATAACATTGTGACATAGGTGCTGGCTGTTATTTTGCCTCCAATCATTTGTAACCTA  | 31287 | A_95_P149132 EB678814     |
| 32222 | 380 | 7  | 841  | CCTACTGCCAAATCTAAATGTTGCTGAATTAGTTAAAGCATTTCAGTGAAGACGAAT    | 31292 | A_95_P231374 DV158544     |
| 32223 | 380 | 8  | 667  | TGTCAAAGAAATCGGAAGAGAGTGGTAAAGATGATAAATCCAGCTCCTGCTTGCC      | 31294 | A_95_P264891 FG639353     |
| 32226 | 380 | 11 | 824  | TGTAATGAAAATACCAGAAGTGATTAGGAGCTTTGGCAATGACATGATCATGGGATT    | 31300 | A_95_P116542 DV159294     |
| 32228 | 380 | 13 | 467  | TGGGGTCAGTTACAACTTATCAGATCTTTCTTCAAGTGTGTAGATACCATATCTTCA    | 31304 | A_95_P219757 TA21462_4097 |
| 32233 | 380 | 18 | 437  | AGCTGCTGTTGCTTCCCTAATGACCTAGCGACTCTTAACTGTAATACATCTTCTCAAT   | 31314 | A_95_P149637 EB679541     |
| 32234 | 380 | 19 | 896  | CCCTTGGTAAACCTCTATAGGTTTCAGGTTAGATTTGCTCAATGAAAAAATGAATTT    | 31316 | A_95_P198292 EB424651     |
| 32236 | 380 | 21 | 155  | AGAAATGGGGGTTCTCAACGATTGGCGAGAAGAAATTCGAAGCTAAGTACCCAATC     | 31320 | A_95_P241780 AJ718633     |
| 32238 | 380 | 23 | 703  | ACTCGTGGCAAGAGCATGGTTTCAGATTGATTTGAGCTGGTTTCGAGATCTAGGTACT   | 31324 | A_95_P125672 EB424754     |
| 32239 | 380 | 24 | 779  | TTGGTAGCGTTTCTGCTCTATCCCTTATCTCTGTACTTGTATATGTTCTTGACGACAA   | 31326 | A_95_P140852 EB444670     |
| 32243 | 380 | 28 | 741  | CCGCTTTTCCATTACCCTTTGTGCTGATGAACCTATCTGCATACCAAGTTATTTTTCATC | 31334 | A_95_P187757 EB683945     |
| 32245 | 380 | 30 | 760  | ATGGTAAAATGGTAGAAAGTTGGAGGCTACATATTTTTCAGGGAGTCATGCTTCCAT    | 31338 | A_95_P152387 EB441159     |
| 32249 | 380 | 34 | 632  | TAAAAGCTTGGTATCTGTATTTCTCTGCTGAAATTGCAAGGCTCACAGCAGAGCGAC    | 31345 | A_95_P029736 BP130716     |
| 32250 | 380 | 35 | 464  | GCTTTCCTTATCTGTTATGTATATCTTCAAGTACTTTGTCAATCTTGGCACTGTTGT    | 31347 | A_95_P019471 TA14297_4097 |
| 32255 | 380 | 40 | 790  | GGATCCTCTTTTCATTTTATTGGGTGCTCCCGGTTGTTTACATGTTGTATATGGTTTC   | 31357 | A_95_P153982 EB684144     |
| 32258 | 380 | 43 | 654  | TTGAGTGTGCGATTGGACGTTTCCATAACATTTATGGCCATTTGGGACATGGAAAG     | 31362 | A_95_P015211 EB680314     |
| 32260 | 380 | 45 | 1495 | GCTAATGTACCAAACAGCATTACTGGAGAGCGGTTTCTGCTCAATGACCCAAGGA      | 31366 | A_95_P145662 TA13587_4097 |
| 32261 | 380 | 46 | 635  | TGTTTTCTGTCTTTGTGCTGAGTTGAAGGAGACAGTTGAACCTCTTGTCTTTTCATACCA | 31368 | A_95_P017266 TA15118_4097 |
| 32263 | 380 | 48 | 749  | AATTACTTGGATCCAGAGCCTCAGCTGTTACTAGCAGAGTTGAATAAGCGAATGGCT    | 31372 | A_95_P163632 EH622700     |
| 32267 | 380 | 52 | 1626 | CACGAGATACTTTTCATTTGGTCTCTGGCATTGCTGTTATGGGATCATGTTTTAAATT   | 31380 | A_95_P207137 Z93771       |
| 32271 | 380 | 56 | 1383 | GAAGCGAATTCAAGACGTTGAAGATTCTTTGAAAAATGTGTGGAAAGTTTAGTTCAT    | 31388 | A_95_P025991 TA18698_4097 |
| 32275 | 380 | 60 | 947  | ATTTCACTTTCCGTTGGGGCTAACGGTTATGCTCCACATTATCTCTATGATTCTATTGC  | 31396 | A_95_P150297 EB680396     |
| 32277 | 380 | 62 | 798  | AAAGAGGAGACGACTTCGGGAGTTAGAGCTCATCAAGACAAAGAGAGCTGCTCTAC     | 31400 | A_95_P310613 FG137144     |
| 32278 | 380 | 63 | 559  | GATCATCCTGATGCATCCTAATGTGCTGCATGTTGCAATCTTCAAGGGGAAAAGGTT    | 31402 | A_95_P141102 EB444888     |
| 32279 | 380 | 64 | 893  | TGTAGAAGGTGTGCGACGTTTGTGACTCCCGAAATAATAATGTTGTTGCTGAGCATAT   | 31404 | A_95_P290033 DV161758     |
| 32286 | 380 | 71 | 1120 | GCCAGTTTGTGCTCCGTTTGTCTTACTTGAATTTTAAATAGATAGGATATGCATATG    | 31418 | A_95_P212022 TA19740_4097 |
| 32288 | 380 | 73 | 236  | CCCGATCATGAAAGATTTATCGCATATATGACGAGTATAGTTGCTTCTTTCTATCA     | 31422 | A_95_P114487 CV021623     |
| 32294 | 380 | 79 | 891  | AAATGCTCTCCGTTTGTAAAGTTTCCCTCTGTTTTTATGAGTTAACTATGCTCATAGC   | 31433 | A_95_P198352 TA16759_4097 |
| 32296 | 380 | 81 | 877  | CGAGTTTCAGATCCTTACGGTGGCTATGATATGATTGGCTTTGGGGATATTCTCTTTC   | 31437 | A_95_P266926 DV161712     |
| 32298 | 380 | 83 | 755  | TACCATAAGAAGCTCTGAGCGCAATGCAGAGACAGAAATCACTGAGATGTTGTTGCC    | 31441 | A_95_P299798 FG137368     |

|       |     |    |      |                                                             |       |                           |
|-------|-----|----|------|-------------------------------------------------------------|-------|---------------------------|
| 32299 | 380 | 84 | 824  | GACTATTCATTGGGGAAAGATGCAAAACAAAGTCCCTTGTTTATTAGTTTTAGCT     | 31443 | A_95_P199117 TA16923_4097 |
| 32305 | 381 | 5  | 359  | CGGAGCTAGTATTATTAGTGTGAATTCATCCATTCATCAAGTATTCGGTTGGTTAG    | 31454 | A_95_P099203 BP534837     |
| 32306 | 381 | 6  | 241  | TTGCTGCTCAACACTAAATCATGTAGCATTTTAACTGCTCTATATGTTCTTAGTGTGCT | 31456 | A_95_P111557 CV020253     |
| 32308 | 381 | 8  | 891  | GTCTAGTTCACATCTTATCATAAGCATTCTGGTCCAGGAAGTCCATTTGGCTGTCCA   | 31460 | A_95_P244857 DW005082     |
| 32315 | 381 | 15 | 634  | TTCGTGGGCAAGATTATCAGTACTGTAACCTATATCCAATAGAAGTTAGAAGCCTTCT  | 31474 | A_95_P125297 DW005088     |
| 32319 | 381 | 19 | 576  | GGTGGATATCTCCTGCATAGAGTTCTGTGGTGATTTTATTGCTTCGGTGCTCTATGA   | 31482 | A_95_P041841 BP130198     |
| 32321 | 381 | 21 | 808  | AACTAGTGATTGTTTATCTGCCAGGCATTTAGAACCTTCTGCAATATACTGAGGAGC   | 31486 | A_95_P216167 TA20646_4097 |
| 32327 | 381 | 27 | 95   | GGCATTGGCAAAGACAAAGATGACACTTGATGTTTATTGAGAAAATAAGTAATCA     | 31498 | A_95_P145757 EB449498     |
| 32330 | 381 | 30 | 244  | CCTTCGGCAATGACCTAAAAGCAAAAGAGCCCAATTTGGAGAGGAAGAGGAAGAAC    | 31503 | A_95_P198327 FG645435     |
| 32334 | 381 | 34 | 1015 | AAAGATTGTGGCTTAGCAATTGATTTGTTCTTCGTTTAGTCTTGTTGGTTATTGAGC   | 31511 | A_95_P012396 TA13907_4097 |
| 32338 | 381 | 38 | 149  | GTCTACGAATGCCCGAAGCATAATTGATATTAGAGTGTATAATCTTTCCGACAATT    | 31519 | A_95_P004476 EH620214     |
| 32339 | 381 | 39 | 502  | TGGAACCTGTTTGTCACTAGTTGCTGCTATGTGCTATTTGCTATCGTGGTTTGTCTA   | 31521 | A_95_P073835 BP526313     |
| 32340 | 381 | 40 | 1066 | ATCAGAATGCATTATTTGTGGCAAATGGAGAACATTGTTTCATCAGAATGCATTATTTG | 31523 | A_95_P187967 TA14467_4097 |
| 32343 | 381 | 43 | 894  | GCAGTTACTCGATTGCTTAGGAATTACTGAAGCAGTTTGTGGTTGCACCTGACTTTG   | 31529 | A_95_P225627 EB442771     |
| 32344 | 381 | 44 | 768  | TGGTAAAGTACAGAATATTAATGAGCAGAAGTTTGTTTTACCACCTGATGTGGAGCG   | 31531 | A_95_P284913 EB439011     |
| 32346 | 381 | 46 | 830  | ATGACAATAGCTCAATGGAGAAACATGGGATACCAAAACCAGCCTGAGCACCAGGC    | 31535 | A_95_P223692 DV161783     |
| 32355 | 381 | 55 | 721  | TGGAATGATTATTCTGAAGGATGGAACCCTAATAAAGGTACTCTGGGGTTATGCAT    | 31553 | A_95_P148587 EB677948     |
| 32357 | 381 | 57 | 994  | CTACTTTACTGTCTTTACATACTCTTAGGTTAGGAGAGGATTAATGACAGCGTATTTG  | 31557 | A_95_P110887 TA13262_4097 |
| 32358 | 381 | 58 | 525  | AATTTTTACGCGGCTCTTAATCCCGCTGTGTTAGTGATGGATCTTCGGTATATACCC   | 31559 | A_95_P072630 BP526013     |
| 32359 | 381 | 59 | 385  | TAGTCCGCTTTGACTTTATTGTGAGCCCTTATATGGTGTTAACAGAATTATGATGGTA  | 31561 | A_95_P112522 EH619918     |
| 32360 | 381 | 60 | 300  | ATCAGAAGCTTTACAATGGGTTACATGTATGGGATCCGAGTATGAAGAATGGTGGG    | 31563 | A_95_P070700 BP192703     |
| 32364 | 381 | 64 | 838  | ATAGTTACTCTGATATGTGTTAGTCAATGCCCTTTGACTGTGTAGTTTGCTCGAGTCT  | 31571 | A_95_P291618 FG169937     |
| 32370 | 381 | 70 | 1200 | GCAACCCAATTGATACTAGTGCGTGTATGTACGTATTTATGTATGTATGTAAAAAGAC  | 31582 | A_95_P032431 AB072391     |
| 32374 | 381 | 74 | 772  | CGCTCTCGTGTGTAGCTATTTTTATTTCTGTGCATATGGAAGAAATCAAAAGGTCTG   | 31590 | A_95_P149912 EB679921     |
| 32384 | 381 | 84 | 748  | TCAAGTATGCAGAAGATGTCTGTGCAGGTGTTATATTCTGCAGAGAGCTCGTCAATG   | 31610 | A_95_P138302 EB427721     |
| 32398 | 382 | 13 | 369  | CTTGCAATCCCAAGTTGGAATCTTCAATTCATGGGTTTCATATCATGTAATTTTAGCTT | 31471 | A_95_P209967 TA19300_4097 |
| 32402 | 382 | 17 | 951  | TGGCTATCCCTGTTGGAACAAGAATTTAAGCACATATGGATCCGTTGATTTACTCG    | 31479 | A_95_P020576 TA18875_4097 |
| 32409 | 382 | 24 | 817  | CCTAATGAAGCAGACGACCTTTATCTGCATTTGAATTTAAGCCATTTGGAACAATT    | 31493 | A_95_P014546 EB426727     |
| 32412 | 382 | 27 | 689  | CGAGATGGGTGGATTTTATGACTTGTATGGAAGCATTTCATGTTCTAATTGAAGTTTT  | 31499 | A_95_P207522 DV160337     |
| 32414 | 382 | 29 | 822  | ATGGCAAGAATATTGTTCTAATGTGTTGTTTATCTTGATCCCACTTTGGACATTCTTT  | 31502 | A_95_P142772 EB446197     |
| 32418 | 382 | 33 | 233  | CTGCTAATGTATTCATTCTTTACCCCGACATACTTACTTTACAAACCATGAACTATTC  | 31510 | A_95_P127657 EB427216     |
| 32420 | 382 | 35 | 190  | AGGCAAATTTGTTGCTAACACCTTTCCATTGAGCTCTCAAGGCATCATTTGTAACCTCA | 31514 | A_95_P109612 CV019382     |
| 32421 | 382 | 36 | 879  | TCTAGCTGCTCAAAGGAATGGTAAACTATCAGTGCAAGCTTTCCAGGTGTGTGTGGG   | 31516 | A_95_P290163 DV162066     |
| 32424 | 382 | 39 | 186  | AATTTCAACAGTGTGAGGGGACAGCGCCAGTACTTTTATGCTGCTACTGGTCA       | 31522 | A_95_P046481 BP131408     |

|       |     |    |      |                                                              |       |                           |
|-------|-----|----|------|--------------------------------------------------------------|-------|---------------------------|
| 32425 | 382 | 40 | 736  | TTGCAATTGTACACTTGGCTTATTGTTTTATCAGTTTGCTAAAAGAAGACCCTCTTCAC  | 31524 | A_95_P180782 TA12825_4097 |
| 32429 | 382 | 44 | 786  | GCGACGGTCTATTTGACTTCTTCAACAATGATGAGGTTGTAAAGCTTGCCATTCTTA    | 31532 | A_95_P117572 DV160512     |
| 32438 | 382 | 53 | 613  | CTTGTTTAGTATTTTTGTCCAGTTGACCCACACAACCTTAAAAACCTTCGCCCGAG     | 31550 | A_95_P316613 FG189664     |
| 32442 | 382 | 57 | 699  | TAAAGCCTTGATGGCATTAACTAATGATGTATACTTTGGAGGTGTTTTACATTTCATG   | 31558 | A_95_P123287 DW003169     |
| 32444 | 382 | 59 | 755  | AGCTGATAGTGTTAGGTATCCTGATTGCTTTGATCCTCATCATTGTCCTCAGTTTTGC   | 31562 | A_95_P292098 EB426444     |
| 32446 | 382 | 61 | 578  | CACGAAGAACTTGACTGCAACACTTCTATAGTAATCTATTATGTCCAGTTGTTATCTC   | 31566 | A_95_P111107 TA14464_4097 |
| 32449 | 382 | 64 | 832  | TGTGCTTGGTAATACAGTTGAACCATGAGGCTTCAGACATGTTATTCTGTTGATTTTA   | 31572 | A_95_P228704 EB427837     |
| 32450 | 382 | 65 | 419  | AACAGTTCAGAATGAGAGTCTTCAAGAAGCATGTGCAGTTTGTCTTGAACTCCTAC     | 31574 | A_95_P075740 BP526806     |
| 32454 | 382 | 69 | 168  | GTGTCACCTTGATATGTGCTTAGAGGCTAGAGCTACCTAGTCTTTGTTCTAGTTACC    | 31581 | A_95_P143737 EB446944     |
| 32455 | 382 | 70 | 814  | TAGTAGTTGACTAGCATAAGTTTATGTAGCCTTCTGCATTTGATCTTTAGGAAAATC    | 31583 | A_95_P010426 TA12902_4097 |
| 32457 | 382 | 72 | 505  | TTATTAACCATCCCCATGATAAACTTGTCTGGAATTCACCCAATGAAGACGCATG      | 31587 | A_95_P036158 BP128656     |
| 32461 | 382 | 76 | 575  | ATGGATCGGAGACCATTTTTCTCTCCTTAGATAAGAAGGATAGTTATTCGTAAGTAGT   | 31595 | A_95_P209377 TA19176_4097 |
| 32464 | 382 | 79 | 411  | TGGGGCTCAATTGGTCATATTGTTGCTTACTATATTCTTGCCACTTCAAGTAATGGAT   | 31601 | A_95_P105257 DV999315     |
| 32466 | 382 | 81 | 1596 | GGGTATTCTCCATAGTTTTTGAATTTAAAAGAATCCTGTTCAAGTTGCTTATATAGGC   | 31605 | A_95_P017036 TA13973_4097 |
| 32467 | 382 | 82 | 393  | CCAGGGCTTACCTGCTAGTTTTTACTATAACCAGCCATCTTTTTCGCATTTCTGATTCTC | 31607 | A_95_P071045 BP525602     |
| 32470 | 382 | 85 | 1451 | AACTTGTGTTGGTTTTACTTGAATTCACAAGGGGGAACACGAAAGAAGGGCTATTCC    | 31613 | A_95_P021256 TA14913_4097 |
| 32474 | 383 | 4  | 1731 | AGCTGTCAAGTAACTAAGAGATTGTCACAAATAATAAGCGCCTCTGTACATCGTGAT    | 31620 | A_95_P006296 TA15721_4097 |
| 32475 | 383 | 5  | 719  | GCAGCTCTGTTTTATAATGGAGCCTACAAGTGCTCTTTCTGGGCTTCTCTACAGCA     | 31622 | A_95_P151682 EB681931     |
| 32476 | 383 | 6  | 587  | TGTTTTCTGTGAATTTTCGGTGTATATACAAATAAAGAACTCTACTGGAGGTTGTGT    | 31624 | A_95_P011246 EB435218     |
| 32477 | 383 | 7  | 470  | AAGGACGAGCAGACTGAAGTGGCTATACATACAAATCTATTTACGGATCTATATGC     | 31626 | A_95_P079790 BP527848     |
| 32478 | 383 | 8  | 856  | GTAATTAATGTAATATTTTGCCTTTGGCTGACATATGCTCAACTACTTTGCCTCAA     | 31628 | A_95_P228714 EB425860     |
| 32479 | 383 | 9  | 714  | GTCAGATCCGTCCCTCGTTCTATATGAAGCTGATAACTCTATTATATATTCTAAGTCTT  | 31630 | A_95_P139517 EB443279     |
| 32484 | 383 | 14 | 263  | CCTGAAAAAGAGCGGAAAGAAATGAGAATGTTATATACTTCCTCCTACTATTGGGAT    | 31639 | A_95_P107792 EH616159     |
| 32492 | 383 | 22 | 209  | GTGTGGGTGTCATCTAAGCTGCTTCATAAAACATCTTCCTTGTGTATATATCTATA     | 31655 | A_95_P201362 TA17407_4097 |
| 32497 | 383 | 27 | 416  | ACCCCTTGCCTGGAATTATCTTGTGTGATAAGTGGAGTACTGAAGTTAGAACTGCC     | 31664 | A_95_P164997 EH624456     |
| 32502 | 383 | 32 | 525  | CCTTCCCGCTTCTCCTGCCCTATGTATAAAATTTTATTCTTCTATAAAAAACACAAAA   | 31674 | A_95_P050316 BP132368     |
| 32503 | 383 | 33 | 403  | GGGGCGTGTGAAAGATGAGAATGGTGTACTTCCATTCTTTTGTATGAAGATATTTT     | 31676 | A_95_P006081 EB442374     |
| 32504 | 383 | 34 | 519  | ATCAGCACTGTAATGCAGTTCTCTCTTTCTTATGCTAGTGATATATGGAACCTGGTTTT  | 31678 | A_95_P102732 CV016167     |
| 32506 | 383 | 36 | 1390 | TCTGTTGCGCGGGATGTTTTGAAGTGTGAGTTCATCGTGCATACCCCTTCTGTTTTTG   | 31682 | A_95_P189922 TA14891_4097 |
| 32507 | 383 | 37 | 386  | ATACAAGTTTACTTGCTTTAACTCTTGATCAGAAAAATGCTAATGATTCCGGCTGTC    | 31684 | A_95_P042086 BP130267     |
| 32512 | 383 | 42 | 417  | TGTGAATGTGAAGTTTGGGATTTACCAAATTGCCGAGTCAATTTGCTTACAGAAA      | 31694 | A_95_P091008 BP531176     |
| 32515 | 383 | 45 | 552  | TTTATTGGTTTCTTGTGTCTGTATGGAGATAAACTAGCTCGTTGCCCTACTTGATTCTT  | 31700 | A_95_P140712 EB444567     |
| 32518 | 383 | 48 | 5835 | CATTTCTATTAGTGACGATCATCAAATTTCAACAGGTTAGTGATCTTTAGCCAACT     | 31705 | A_95_P222627 AB281587     |
| 32521 | 383 | 51 | 906  | CACAGTATAACTACAAAATTATTTGAATGCGACTAGGCTCGGTTGGAACATGTCATA    | 31711 | A_95_P225952 EB680121     |

|       |     |    |      |                                                              |       |                           |
|-------|-----|----|------|--------------------------------------------------------------|-------|---------------------------|
| 32524 | 383 | 54 | 175  | TCTCCCAGAAACAGAGTAAATTGTAATTGTTGAGTGGTATAAGTTGACTTTTGTCCAC   | 31717 | A_95_P100288 BP535304     |
| 32526 | 383 | 56 | 564  | AAGATTCCTTTGTGTAGCATATCTGAGCCCTAGGAAGAGATTATCCCGTCTTTTCTGG   | 31721 | A_95_P149662 TA17318_4097 |
| 32528 | 383 | 58 | 728  | ACTGAAACATGATTAACCTTTGTTATACTGATGTGTCTGAATCAATGCTGCATTGTTCTC | 31725 | A_95_P151732 EB681978     |
| 32529 | 383 | 59 | 382  | TTCTACATATCCTTAGCAGCACTCAAACCTTTATTGCCTGCCTAAAAGTTATTGATCTCC | 31727 | A_95_P124522 DW004332     |
| 32531 | 383 | 61 | 513  | TTTGTGAGATACAGTTTGTGCTGCCTGATTAACGTAGAAATTAATGACATGTAGCGC    | 31731 | A_95_P023591 EH624123     |
| 32532 | 383 | 62 | 815  | GACATCAGGTGTTGTGCAAATTGGCGACGGATAATAAGAAGGGGAAGCCCAACAT      | 31733 | A_95_P228564 DW000863     |
| 32533 | 383 | 63 | 659  | TATTCCTTATGGACCGGTGACATTGAGGATTATATAGTTCCAGTTTGCAGGGAGCTTC   | 31735 | A_95_P265781 FG643494     |
| 32536 | 383 | 66 | 576  | TATCTGATTCGGGCTGAGTGCATTGTTAGACTCAAAAAGGCAAGATGGTCTCCTCC/    | 31741 | A_95_P152047 EB682345     |
| 32537 | 383 | 67 | 688  | TTTCGGTGTGCACCCCTAGCTCAAGCTTCGCTAAAGTGATCTATCTTAATTGTACCT    | 31743 | A_95_P164657 EH623919     |
| 32540 | 383 | 70 | 801  | GAAAAAACTCGAGTATAACATGCCTCCGGATGTTCTGTACATTGCTCTTTCTCCTTTT   | 31749 | A_95_P146587 EB450655     |
| 32543 | 383 | 73 | 647  | GTCGCTCTGTTCAAATTGTAGCAAGTGACTTGGATTTTTTATGCAAGTGGTGTTC AAC  | 31755 | A_95_P188757 FG163849     |
| 32555 | 383 | 85 | 296  | TGTTTGAACGTGCTGATAGAATCGGTGGTCTGATGATGTATGGAGTGCCCAACATGA    | 31778 | A_95_P163997 EH623051     |
| 32559 | 384 | 4  | 300  | ATGGTGCATTTGATGTGATATACAGTCCGGGATACTATCCTTCACATCCAGGACAAA/   | 31621 | A_95_P026863 BP192559     |
| 32561 | 384 | 6  | 507  | AACAGTACAGGAAAATACAAGCCAAGAAATGGAGGTTACAGTTTAAATGGTTACTTTA   | 31625 | A_95_P099343 BP534893     |
| 32563 | 384 | 8  | 856  | ATGTTGCCAGAAGATTTAGCTGATATTTTTCTTCAGCATCATTGAGCCGAGGGTCTA    | 31629 | A_95_P253594 EB451249     |
| 32565 | 384 | 10 | 262  | GATGACTCAATTGTGCGAATCAACGGTTCCTCTCGTACTAGGTTGAATTACTATTGCG   | 31633 | A_95_P089353 BP530467     |
| 32569 | 384 | 14 | 834  | TGACTCATAAGAAATCGCGGACTGATCTTGATCTATCTGCTCTGGTGGGTCTCATATC   | 31640 | A_95_P256039 FG147527     |
| 32570 | 384 | 15 | 383  | CCTTCTGTATATACCAACTAGTTGTATTCTAAACCTCAAGAAATGAAAAGCAGCGAA    | 31642 | A_95_P074260 BP526418     |
| 32576 | 384 | 21 | 834  | TTCGAGCCGTGAAATCAGCCATTGATGCTTGTATGTATCAAGGTAGGCTACCTACATC   | 31654 | A_95_P141547 EB445231     |
| 32578 | 384 | 23 | 824  | AAACCATTGGCCCTATTTCAAGTGGCAACTCTTCCAGTGGTGAATGGATGATAGTGG/   | 31658 | A_95_P229234 DV161417     |
| 32581 | 384 | 26 | 1503 | GTTATTGACAATTGTAAGAGTGGTGAAGATTTTTGCGACATGTTTTGAACCACAGC     | 31663 | A_95_P191342 TA15215_4097 |
| 32582 | 384 | 27 | 491  | GTCCGTTAGGATTCATAAGCCGACTTAATTTGTTTGAATTGAGCTGTTATTGTAGTG    | 31665 | A_95_P001511 BP530317     |
| 32583 | 384 | 28 | 770  | TCATTTCTAAACCAATGGTATGAAGAAGGTTGCATCATTGTGCCCAATGATTGTTCA    | 31667 | A_95_P216067 TA20624_4097 |
| 32586 | 384 | 31 | 792  | GTGACATCAAGAGGCTTCTAGTGAATACAATTGAAATTTACTTTCAAGTCTGGGAA(    | 31673 | A_95_P148852 EB678378     |
| 32589 | 384 | 34 | 654  | GTGCAGGACGTAACATGCGGAAACCAACTAGTTGTTCTTTTTCATGTAAATTTATTT(   | 31679 | A_95_P149577 EB449268     |
| 32590 | 384 | 35 | 1066 | GATCTCTTGATTGAAGAGTCATTGACTACTTCTTGCTACGATTTTCTAACTGAATATG   | 31681 | A_95_P177032 TA11861_4097 |
| 32592 | 384 | 37 | 639  | GGAATGTTAGATACACTCCACAGGCTAAGTAGATTGACCGTCTCTTTGCAATCAAACI   | 31685 | A_95_P018881 EH617531     |
| 32593 | 384 | 38 | 1150 | TCACTGATGCTGTCATTGCAAATCTGGACTAATTTCAAAGCCACTTCTATCTCTTTCTG  | 31687 | A_95_P187457 TA14350_4097 |
| 32595 | 384 | 40 | 577  | TCTCACAAAAATCTGAAGCGTGGTAGAATTCATTGGCAATGCTGAAGGTCAAAGG(     | 31691 | A_95_P042016 BP130245     |
| 32598 | 384 | 43 | 748  | AAATTCACCTTCTGAGGGTTGGAAGGAGCCAGGTAGATTGGTGCTTTTGACAGCAGA/   | 31697 | A_95_P128402 EB428101     |
| 32606 | 384 | 51 | 375  | GTTGGTCCTTTGCAATTGGCAGCTATTTCTAATTGATAACATTA AAAAGCCTTGTTG(  | 31712 | A_95_P026436 CV016369     |
| 32612 | 384 | 57 | 841  | CAACCAGGCAATTTGCTTGTGATCTGTACTAGCACGAAGAAATCTAACACACGTTTT    | 31724 | A_95_P013186 EB450017     |
| 32615 | 384 | 60 | 823  | TGATGGCTGAAAGTTGGGAGTGTTTCGCTCTTTAAGTTATTTGTGTAACATTTTCTGG   | 31730 | A_95_P208247 TA18926_4097 |
| 32616 | 384 | 61 | 0    | TTGTATTCAATTTAATCCAGCTGTGTAGATGCTTTGGATGAACTCATGTACCATAGTC   | 31732 | A_95_P032231 A_95_P032231 |



|       |     |    |      |                                                             |       |                           |
|-------|-----|----|------|-------------------------------------------------------------|-------|---------------------------|
| 32617 | 384 | 62 | 815  | CCACCGTGTTTTGTCTACAATCACTTGAATGTTGTTGTTTGTAGATAATACAGGTTGC  | 31734 | A_95_P227839 EB426182     |
| 32618 | 384 | 63 | 461  | TCTTGGGTTTTCTTCTTTTTCTAATGCTAGAAAATGTCGGTTGGAGACCATCCTTGTT  | 31736 | A_95_P190442 TA15016_4097 |
| 32619 | 384 | 64 | 0    | ATAATTATATGGACCTCCTCCTCCACAACATGCTACAATTGTGCTTGTAAAACCAAT   | 31738 | A_95_P248767 A_95_P248767 |
| 32621 | 384 | 66 | 825  | CTACGAGCTTGCAATCGCGTTGATTTAACTACAGGTAGTTTTAGACGCCATTGTTGTT  | 31742 | A_95_P012261 EB678192     |
| 32622 | 384 | 67 | 782  | GCTAGATCGGCTTGCTTAGTTTTTTAGGCTAATGTTACTTGCCTTGCCTTATTCACTT  | 31744 | A_95_P269166 EB451554     |
| 32627 | 384 | 72 | 774  | GTTTTGTAAGTCAGTGCCTCCAGAAGCTGATGATTGAACCATTGGGATAATTACTTT   | 31754 | A_95_P163572 EH622605     |
| 32628 | 384 | 73 | 358  | GCATAACTAGTTACTGAGCTGTAACACTTGATACATCGAGCTATAGTATGAAATAGT   | 31756 | A_95_P131222 EB431369     |
| 32629 | 384 | 74 | 1334 | CTGCTGTTTACAGTAGATCAGATACTAAAGTGTCTCATAACAAGCTTGAACAATCT    | 31758 | A_95_P013701 TA12999_4097 |
| 32633 | 384 | 78 | 347  | CATTTCTAAAAAGCAAGGATGCTCGTGATGGTACTGAGCAGGCTCTGCTCGACGAA    | 31766 | A_95_P104767 CV017162     |
| 32634 | 384 | 79 | 825  | TATTCCTACGATGTTGAGATGGTGACATGATTGTTTCTCCCTACATCTGCGTGACTC   | 31768 | A_95_P309923 FG166468     |
| 32640 | 384 | 85 | 624  | GCCTTTCATCCAGAAGGTGCTTGAGGAGCCATTCTTAAAAATTGAGGTTCTAAATA    | 31779 | A_95_P195362 TA16099_4097 |
| 32649 | 385 | 9  | 620  | GTAATACTTGCTGTTGGAATTGTGCGTGGGTTGGTTTTGCAAAATCTAATGTGCCTCC  | 31796 | A_95_P162102 DW000310     |
| 32652 | 385 | 12 | 192  | TAAGAAGCTTGTTTCTTGCTACAAAGTGAAGGCCCTCAAGCTTGATGAAAGTTGAGAT  | 31802 | A_95_P112572 CV020742     |
| 32661 | 385 | 21 | 834  | CCCAGATAGCAAGCTTTTTACTGTTGTTGGGATGATCTAGATGGTTTACTTGTTGAT   | 31820 | A_95_P118392 DV161438     |
| 32662 | 385 | 22 | 231  | ATTGATCAGTACGTCATTGCCTGTGAGTTCAAATTTTAGATAGTATCGACCCGTGTC   | 31822 | A_95_P078921 BP527639     |
| 32665 | 385 | 25 | 54   | GCAACTACTGTAGCTTTTCCCCCTTACTTGTACCCTTCTGTTGTGGTTTTTATTTTC   | 31828 | A_95_P098818 BP534656     |
| 32668 | 385 | 28 | 522  | GAATCAAATGCTTTAATTGTTGATGAACGTCTATCTATTAACAGGATCTGGGCTCC    | 31832 | A_95_P196807 TA16422_4097 |
| 32669 | 385 | 29 | 680  | CGGGCAACTCTAAGAATGGGGTTTTTATTTTTCTTTCTTGAATACTTTGTGCAATC    | 31834 | A_95_P026771 TA14756_4097 |
| 32676 | 385 | 36 | 528  | TTGCTCTTATGTATAGTCTCATTGTCATGTTGTGTGATCGCCATGATTTTCAAATC    | 31848 | A_95_P023141 EB452030     |
| 32681 | 385 | 41 | 688  | AGGCGGGTGCATAAATGCATGGCAACTGTGATTGTTTATGAGTAATATAC          | 31856 | A_95_P121777 DW001876     |
| 32682 | 385 | 42 | 351  | GGCAGTCTAGAGTGGTTTCGCTGATTTCTGTAACCTTTTATACTGATATGTACTTG    | 31858 | A_95_P158572 EH616493     |
| 32689 | 385 | 49 | 1011 | CTGAAGAGAGAAACATCAAGATGCGAGAGCATCAGACAAGCTTATAACTCTATAT     | 31872 | A_95_P107142 TA13160_4097 |
| 32691 | 385 | 51 | 543  | GATCAGAGATGGTCGTTGGCTGCTGAGGGTAAACAATTACAAGTTTGGGAATCTTC    | 31876 | A_95_P273391 EB102906     |
| 32693 | 385 | 53 | 779  | ATGAACTTGCTGAGAGGGCACTAGACGGCCAATTAATGATGGAATGAAAGAGTAT     | 31880 | A_95_P004061 DV160152     |
| 32699 | 385 | 59 | 694  | ACCACAAATGTTACTGAAAATCATTATGTATATATGAGGGCTTCTGCCCCTTGATCTG  | 31892 | A_95_P299213 FG639329     |
| 32710 | 385 | 70 | 595  | TTGCTTTTAGAAATTATGCCCTTGCTCTTTTGAGTTCCCACTATCTCTCTCCAGCATT  | 31914 | A_95_P220787 TA21683_4097 |
| 32713 | 385 | 73 | 522  | GGAACCAAAGTTGAATCTCTGTACATAAACTTATCACGTAATGCTTATGCCAATCCA   | 31920 | A_95_P133567 EB435127     |
| 32714 | 385 | 74 | 668  | TAGCCCGCAGCTGTTCAATGAACAATGTAATACTATCAATCTAATGTTTTGTAGTTGA  | 31922 | A_95_P032706 AF049355     |
| 32715 | 385 | 75 | 310  | TTCCTATGCTTGAATTCAGACAGAGCACGGATAAGTCTACCGTGAAAACAACAAG     | 31924 | A_95_P112312 CV020620     |
| 32716 | 385 | 76 | 755  | CCTGAATTCGGTATTGTGAACCTATGACGTGTTGAACTTTTTGTTTTGTATTCCAAGT  | 6784  | A_95_P000061 DW000215     |
| 32718 | 385 | 78 | 361  | CGGTATCATGTTAGTCTGTAGATTTTAAAACTCATTGAAGCCTGTTCCCTAAGTAT    | 31929 | A_95_P025301 EB680812     |
| 32722 | 385 | 82 | 1559 | CTAAGTTTTAAACTTTTCCCCTGTTGTTATTGGATGACTGTATTTTGCTTTGCTGGCA  | 31937 | A_95_P188242 TA14527_4097 |
| 32723 | 385 | 83 | 610  | CCGCACTTGGCTGCATCAATTTGTATGTTGGGGTCTATCTATTAATAGTTTTGATTCT  | 31939 | A_95_P190137 TA14944_4097 |
| 32726 | 386 | 1  | 774  | GGGTAGTAGTTCTGGTTATCTGTTTGAATACTATAACATTGTTCCGGTATTGTTTTGCT | 31781 | A_95_P248927 TA12662_4097 |

|       |     |    |      |                                                             |       |                           |
|-------|-----|----|------|-------------------------------------------------------------|-------|---------------------------|
| 32729 | 386 | 4  | 1458 | CACATGATGGGATCTCATAGAAGAAGATGAACCATAATTGTCTTTCTTTCTTAGTG    | 31787 | A_95_P176892 TA11816_4097 |
| 32731 | 386 | 6  | 323  | CTGATGGCGACGAAATAAAAAGCATTGACACTGTTGGTCCATATTGCCGGCGAAGTT   | 31791 | A_95_P014151 BP532677     |
| 32740 | 386 | 15 | 452  | GTGGTTCTATTTAAGACAGATCCAATGATGATTGCCTTTTGTCTTTATATACTAGTT   | 31809 | A_95_P190232 TA14966_4097 |
| 32741 | 386 | 16 | 555  | TCATTCATTTGTCTGTTACATCTCTCAAACGAAGAGATATCAATGGACACAAAATGA   | 31811 | A_95_P198012 TA16686_4097 |
| 32744 | 386 | 19 | 1190 | TAATGAAGTGTGATGTGATACCCAGTGGTATTGTTAATGCTGCCAAACAGGTTCAAC   | 31817 | A_95_P184567 TA13723_4097 |
| 32747 | 386 | 22 | 754  | GGTCTGTTAACGTGTACACATGATTAGTTCAAGCCTATATATGTAATTGTTTGCCCAA  | 31823 | A_95_P205222 EB430967     |
| 32749 | 386 | 24 | 901  | GAACCTAGCTAAGTATTTTGATATCCGAGGGATTCCAAGCCTAGTGGTTTTGGGCC    | 31827 | A_95_P192072 DV161797     |
| 32750 | 386 | 25 | 755  | CCTGAATTCGGTATTGTGAACCTATGACGTGTTGAACTTTTTTGTTTTGATTCCAAGT  | 6784  | A_95_P000061 DW000215     |
| 32752 | 386 | 27 | 465  | CCTTTTATCTTATCCTTCTATTCTAGGCGAGGAGGGAAATTCAGAATAAATAGCCCCA  | 31831 | A_95_P277633 AM811238     |
| 32753 | 386 | 28 | 375  | TTGGCTGTTGTTGGGATAAGCCTTGGGAGAAAGTTAAGAAGCTTACTTCTTTCAA     | 31833 | A_95_P003671 EB425393     |
| 32755 | 386 | 30 | 511  | TCCAGAAGCTCTCCGTAGTTTGAACCTTGAAGTCTGATATTTTCTATTTGACTGAACT  | 31837 | A_95_P068005 BP137025     |
| 32760 | 386 | 35 | 779  | GTCACAGCAAGCATTTTTCTTTTGGTGATAAATATTGCAATTTGAACTGTGGTTTCTC  | 31847 | A_95_P117367 DV160263     |
| 32761 | 386 | 36 | 547  | GGTATTTCTCACGTCTTCCACCTTCAGTTAGAGGAAGATGTCAATGATGTTATCTTT   | 31849 | A_95_P272826 EB678838     |
| 32767 | 386 | 42 | 575  | AAATTCTGCTGGACAGGTTGCGCTAGACATATGCCATGTGTGTTTTCTTTGTGCTTGGC | 31859 | A_95_P039816 BP129660     |
| 32769 | 386 | 44 | 450  | CAAGTGCTATGAACGAACGAGGTTCTCTTTGTACACTTTATTATTTTTGCTTTAGTTG  | 31863 | A_95_P211027 TA19523_4097 |
| 32771 | 386 | 46 | 1244 | CGGCGTATTTGCCCTGTAGCAAGACATGATAAAAGGCTTAAAAGAACTAGAGAA      | 31867 | A_95_P248562 AF154648     |
| 32773 | 386 | 48 | 1274 | TTTTCAAGAGGTTAGTATGGCGAGTCCCACAGTCCATGTGATTCCGCTTTTGTCTC    | 31871 | A_95_P203492 TA17864_4097 |
| 32774 | 386 | 49 | 884  | CAGAGAATAGATGTTTCATTGGTAAATGGTAATGGAATACTTCCCTGTTTGTCTCTC   | 31873 | A_95_P178017 TA12123_4097 |
| 32775 | 386 | 50 | 642  | AGAAAGGGCACAAACAAGTACCTACAGAGCAGCCTGAAAGATGATTCTTTCATCAG    | 31875 | A_95_P304963 FG179618     |
| 32776 | 386 | 51 | 158  | ATGATGGGTCTGTCAATGAAAGTTTATTCTTGTGTTGGAGGGCAACCTCTTCTATTTG  | 31877 | A_95_P133272 EB434602     |
| 32779 | 386 | 54 | 859  | CAGCATTCTGAAGCCAGAGATTGTGCATGTGAACAAAAATTGATTGTATGATACTTATC | 31883 | A_95_P122822 DW002770     |
| 32780 | 386 | 55 | 822  | TTACCGTAACAGCAAAAGCAGCTGAGGACACTGAGTTTGGGGAGCTTTACCTCTTCA   | 31885 | A_95_P208192 EB449876     |
| 32781 | 386 | 56 | 821  | ACAACCTAACGCTGCAAGACACCGTTTCGTAGCTGGAAGTCCAAGATACTGCTTGAA   | 31887 | A_95_P290788 DW001180     |
| 32783 | 386 | 58 | 934  | TTGGAAGGTCTCTTGTGCATATAGATGATACATGAGATTATATAGTCCATGACTTTGT  | 31891 | A_95_P221982 TA21934_4097 |
| 32786 | 386 | 61 | 852  | CTTTCCAACTCTTCTATTATTCTCAACTTCAATTGCTATGAGCTTATGGTTGTAGAC   | 31897 | A_95_P243442 EB449743     |
| 32794 | 386 | 69 | 780  | TGTTTCGTATGATATACAGCACTCGGGATAGTGGAAAACATCTTCATTACCATGACT   | 31913 | A_95_P199447 EB679306     |
| 32796 | 386 | 71 | 717  | AGCTCCAGTTGAGTTGAGGAATTCCTGTTGTTCCCTTCATTCCGCTTGACCTTATTTG  | 31917 | A_95_P148862 EB678383     |
| 32801 | 386 | 76 | 812  | GGTACCTGCAGATTTGAAGGAAGAGTAATTATGAAATTGAAAATCTAGAGTGACATC   | 31926 | A_95_P213072 TA19971_4097 |
| 32802 | 386 | 77 | 113  | CCACGTATTGGTATCAAATCAATTATGCCTTTCAAACAATAAATTGCTTACTGCCATC  | 31928 | A_95_P158052 EH616104     |
| 32806 | 386 | 81 | 840  | TTCGCACATTGGCACCTATGGACGTCCTATTACCCTCGATATGACTACGAGAATGTG   | 31936 | A_95_P223872 FG143525     |
| 32811 | 387 | 1  | 384  | GCACGGTTGTGGCTTTTGGCATGTTTTGAAATTAGTTAATCAGATGGGTTCTTCCAAT  | 31945 | A_95_P084925 TA21634_4097 |
| 32815 | 387 | 5  | 391  | TTTTCTATTTCTCATCCGGTGCTCGGTACTCGCATTGAAGTCCGGCTATATTCCGATTT | 31952 | A_95_P076860 BP527101     |
| 32818 | 387 | 8  | 935  | TTGGCATACTTGCACTGTTGGTGTAGTGGAGAAGGTTTCGTGGCTAGGGATATAGC    | 31958 | A_95_P316268 AY772945     |
| 32819 | 387 | 9  | 416  | TTTTGATGGAGCCTATTGAAGGATGAACTTCTTGTATGTTAAGCGGCCGCATGAGG    | 31960 | A_95_P270461 TC69261      |

|       |     |    |      |                                                              |       |                           |
|-------|-----|----|------|--------------------------------------------------------------|-------|---------------------------|
| 32823 | 387 | 13 | 96   | AAGTAGCTGCCATTCAGAAGCAGCTTGCTTCTCTAAATCTTCAAGAGGCTCCTGTAAT   | 31968 | A_95_P251617 EB450323     |
| 32825 | 387 | 15 | 197  | GTTCTCCACTTTCTGATGGATTAGGGTTGAGATTTGATAATGTAATTCTCCATTACAT/  | 31972 | A_95_P210857 TA19485_4097 |
| 32826 | 387 | 16 | 848  | GTTGGCTATAAACATCTTAAGTTGGCATATCCAATGTGAGATTTGCTCTTCTTACA/    | 31974 | A_95_P008721 TC40562      |
| 32827 | 387 | 17 | 634  | TCCTTGAAACCTGACTCCATTGAAGCTTGTTCTCCTCTGTCAACATACATATCAGC     | 31976 | A_95_P050616 BP132438     |
| 32831 | 387 | 21 | 493  | CAGTTGCAACTGATCGTTGATTATGGGCTTGCTCTTTCTGATTGTGGTTGGGGTCA     | 31984 | A_95_P045916 BP131262     |
| 32836 | 387 | 26 | 1255 | CAAGGGAAACTCTTTTTAGTAAGTGTTAGTGTTCCTCAATAACCAATAAAAGGGCTAGT  | 31994 | A_95_P027451 TA15950_4097 |
| 32837 | 387 | 27 | 427  | CTAAAGCAATCCCATGTCCAGCAAATAAAATATTTTGAGCACTACATAGAGAAGC      | 31996 | A_95_P316763 FG193947     |
| 32841 | 387 | 31 | 751  | AAGATTGTATGAGTCGTATGGGGTATTTGGGTGGCCTCAGCTAAAGCAAATCTTGA     | 32004 | A_95_P125052 DV162505     |
| 32842 | 387 | 32 | 696  | AAATCCCCTCCATCACATAGTACTATGGATCATCTCCAGTTATGATCCTAATCGTAT    | 32006 | A_95_P301513 FG201996     |
| 32843 | 387 | 33 | 513  | TTAGGGTTATTGGGTAAGTACTAGGCTTATCTGGGAAATTTGGGAACTAGTTTTCTTCT  | 12052 | A_95_P000101 FG167017     |
| 32845 | 387 | 35 | 153  | GGTGATGACACAATTGGTTCCTCGTCGATTGACCTCTAGTAACTTTTTAGATATTA     | 32011 | A_95_P134042 EB435830     |
| 32847 | 387 | 37 | 738  | ATTTTGGTCTCAGTAAGTTTTGAGTCATTCTCTAAAGGGGATTCGATACCCTTGTTG    | 32015 | A_95_P144542 EB447964     |
| 32848 | 387 | 38 | 267  | CATGTATGATAGGCCAGTTTGAGCTCTGGCAAGTATGTTGTACCAATGAAAGAGAA     | 32017 | A_95_P152747 EB683096     |
| 32849 | 387 | 39 | 106  | TATGCGCACAAATTACAATGCACAATGAAGTGTGCGGTAGTATATATATGTAATTGAC   | 32019 | A_95_P030571 EB426802     |
| 32850 | 387 | 40 | 335  | TTTTACCTGCCAATGTCAATAGCATAATCACCACGGATGGTACCAGGAGCAGACTCC/   | 32021 | A_95_P063355 BP135757     |
| 32852 | 387 | 42 | 824  | GTGTTTCATCGGTCAGTTTGGTACGGTTTTGAAAGATTTGGTTTTCTGTATTTTCGTTTT | 32025 | A_95_P018121 DV159211     |
| 32854 | 387 | 44 | 829  | GGTACAATTTACTGTCCAATGTAACCTGGATAACTGATCAATACATCCTTAATTTCC    | 32029 | A_95_P216412 EB677605     |
| 32855 | 387 | 45 | 633  | TCCCGTTAAATTAATAATAATCTGCAGACAGCTTTGGGTAATAAGCTGTCTCCATT     | 32031 | A_95_P285043 FG640348     |
| 32857 | 387 | 47 | 550  | TAAAGCTGTCAGCGTAGGCTTTGAAGTTTTGATAGAGAGGCATTCTAGAGATTTAAC    | 32035 | A_95_P274428 AM787875     |
| 32860 | 387 | 50 | 767  | CCTGGTTGTACAATAAGAAGATCAGTATGGGATCATAGTCCATCAAACCTATCAACA    | 32041 | A_95_P146347 EB450375     |
| 32864 | 387 | 54 | 460  | GAGGAGGAGGGATTTTTTGTTCATTGGCTTTTTTCATCCTGATAGCTGTAGTTGTAAC   | 32049 | A_95_P144102 EB447262     |
| 32865 | 387 | 55 | 462  | CACTAGTGCTTACATTTAACTTGGAAGCGTTCATATGTTCTGTTTCATCCTAAAC      | 32051 | A_95_P002136 FG635120     |
| 32867 | 387 | 57 | 1672 | GAAAGATGCAGCCAAGACTCTGTTGCCAAAACCCCTTTTTTGTATGTCACATAATA     | 32055 | A_95_P013491 TA12596_4097 |
| 32870 | 387 | 60 | 770  | TCCTTACCAGACGATACAAATGTTTACTGTGGCCACGAGTATACATTGAGCAATTC     | 32061 | A_95_P146077 EB449939     |
| 32873 | 387 | 63 | 757  | GTTCTGTGCAACTGTAGCTAGACTTGTAAATCTTGGAAAGATTGTTGGGTCCTCGTTTT  | 32067 | A_95_P222732 TA22098_4097 |
| 32874 | 387 | 64 | 753  | GAGGAGCATCTTGTTGGTTGAATGCTGATACAGTTGTATTTTTGTTGGAATGCATT     | 32069 | A_95_P191222 EB450418     |
| 32877 | 387 | 67 | 708  | CAATTATTGAATCTCTAGGTTCAAGGAGTGCTCTATTAAGCATGAGGTTGCTTATGT    | 32075 | A_95_P127397 EB426936     |
| 32878 | 387 | 68 | 497  | AGTGAAAGGATCATTGAGCAGATGATCCAATCTAATGTGAAAGTGGGATATTACTTT    | 32077 | A_95_P007916 BP534491     |
| 32880 | 387 | 70 | 147  | AACTCCAGTACCTTCTCCTGTATCAATATCAAATATCATAGAGAATGTTCTTGTTCTC   | 32081 | A_95_P150177 EB680249     |
| 32884 | 387 | 74 | 563  | GCGTTTGAACAGTCTTACTCATAACATCTTTTATTATGAATTGACGTTGTTGTTGTGC   | 32089 | A_95_P123852 DW003746     |
| 32891 | 387 | 81 | 406  | AATGTCACCTAATGTAATTCGCTTTTGGAGGATATTGAACTTTGATAGCCATTTTCGC   | 32103 | A_95_P000731 TA12957_4097 |
| 32894 | 387 | 84 | 491  | TTTATGTTGTGTTAGAACCATTGAACTTTCAATCTATTGGATCGACCCCTTGATCTTC   | 32109 | A_95_P022766 TA15383_4097 |
| 32901 | 388 | 6  | 159  | CATTGCGCACTTTGTCACCTTCTATCAGATTACCATGAATAAAAAAGTGCAAACAATT   | 31955 | A_95_P134177 EB436159     |
| 32902 | 388 | 7  | 746  | GAAGCATCAAATCCTAAAATCTCTGAGTGGTTTATCAAACGTTATGGTCCAAAGGTT/   | 31957 | A_95_P246692 FG197835     |

|       |     |    |      |                                                              |       |              |              |
|-------|-----|----|------|--------------------------------------------------------------|-------|--------------|--------------|
| 32906 | 388 | 11 | 848  | TTTTGTATCCTGTGTGATTGCCTTGGTATGAGCTTGATGATACATATCATGAGCTTTTC  | 31965 | A_95_P293948 | EB438840     |
| 32913 | 388 | 18 | 508  | ACACCTCCTTTGTATGGAAAGCTGAGTGACTTCTTCTGGTAATGTTGATAAGACATCC   | 31979 | A_95_P206467 | TA18524_4097 |
| 32915 | 388 | 20 | 813  | ATATGTAATGTGTGCACAGGCTCTTTATAGTAATACTTCTCTGTAGAGGTTGTTGCT    | 31983 | A_95_P148522 | EB677870     |
| 32918 | 388 | 23 | 75   | GGTGGACATCTTCATGCAATTTGTAATTTGCTCCTCGTTCATCCTATTTCTGTATAAT/  | 31989 | A_95_P102702 | CV016152     |
| 32919 | 388 | 24 | 809  | GTTGCCTTAAAAAGCACGAAGACATTGAACATGTTAACATTAACGACTACCAAGAA     | 31991 | A_95_P220057 | EB428295     |
| 32921 | 388 | 26 | 465  | TATCGGCATGAGCCCAAAGTGGCATGGATCTATTCAATATGCTACGGATTCTCGAGG    | 31995 | A_95_P058686 | BP134534     |
| 32922 | 388 | 27 | 464  | TAGCCACAAATGCTTGTGCTGAACTCACTTTACACTAAACAACTTCTATTGTGCATT/   | 31997 | A_95_P273486 | FG638324     |
| 32923 | 388 | 28 | 468  | AGGTACTTTAAGAATTCAAGAATGTTTGCTCCGCTGCACCTTGATAGTATCAGTGGTC   | 31999 | A_95_P278213 | AM803975     |
| 32925 | 388 | 30 | 718  | TTGGAAGGTTTTTCGGGTGTTGAAAGAATGGTGGCTTGAATCTCAAGGACCACATTG    | 32003 | A_95_P316233 | FG197071     |
| 32932 | 388 | 37 | 643  | CATCCTCCAACCTCAAATCATCTTAAGTCGTTCAATGATAAAGAGTTGCAAATCTTTG/  | 32016 | A_95_P062775 | BP135601     |
| 32935 | 388 | 40 | 808  | TAATTCATTGTGCTTGGGGCAGCGTCTTGTAGGCAGAGGGATTGAAAAGCAGAAAATC   | 32022 | A_95_P190577 | EH615701     |
| 32936 | 388 | 41 | 1582 | TTGACATTATGTATTGGCCCAAGTCATCCGTGACACTTGATCTAAGATATGTTCAAT    | 32024 | A_95_P189662 | TA14836_4097 |
| 32940 | 388 | 45 | 834  | TAATTGCTGAGCAATCACTTCTTGTTTTTGGAAGAGGTTACAACATATGCAACAGCTCT  | 32032 | A_95_P221417 | DV161551     |
| 32947 | 388 | 52 | 685  | TTGACATTTACTATCCGTATAACCCGTCTGAGGATACAGAATAAAGTGATCCACCAA    | 32046 | A_95_P190717 | DV162449     |
| 32951 | 388 | 56 | 837  | AGACTTAACGATGGAGTTCCTATGGGTTGATGAGTCTGGGTTCTTCTTCTTACCAC     | 32054 | A_95_P292493 | FG172957     |
| 32955 | 388 | 60 | 705  | AAGCAGTAGCTTGTTATCCCTGTATGGCAAATGCCTTTCGGAATCTTATTTATCCTC    | 32062 | A_95_P019901 | TA21562_4097 |
| 32958 | 388 | 63 | 526  | TGGATTCACTATCATATTGGGGGACAACCTCTGAAAAGGCTTGGTTATGATCAAGAG    | 32068 | A_95_P092808 | BP531984     |
| 32962 | 388 | 67 | 562  | AATGGAGATGCTTCTCCAGAGATCCAGGATGTGCTAAATGTTTCGCTTCTCACTCCA    | 32076 | A_95_P215862 | FG136377     |
| 32967 | 388 | 72 | 793  | GTGGAGGCCAGCTATTATGCATTTTGGATCAACATATTAATTTGTGCTTCTATAATCC/  | 32086 | A_95_P116852 | DV159654     |
| 32973 | 388 | 78 | 738  | AGAAGAAAGGGGGCTATTCTATCACGGACAAACTCATGTTTACGTTATATATGAAGT    | 32098 | A_95_P013076 | EH621684     |
| 32977 | 388 | 82 | 853  | AACCATTGTAATGGATTGAATTCTCCTTGTTTATCGCCATTAGCTCGTGGGAATTTCTC  | 32106 | A_95_P147447 | EB451880     |
| 32978 | 388 | 83 | 656  | ATCTTAAGGCCTCCATTTCCATGAAGGCATGAACAAACAATTCCTCGCAAGATAATT    | 32108 | A_95_P193893 | TA15769_4097 |
| 32979 | 388 | 84 | 711  | GGGAAGATAACACCTGCAAAATGCAGATACGAAGTGATGTCTACCAAAATTGAGATC    | 32110 | A_95_P126687 | TA13868_4097 |
| 32982 | 389 | 2  | 500  | GCCCTACTGTCACTTGCTTATTGTATTATGAATAATTCTTCTTTTGGGTTGACTCTCTA/ | 32115 | A_95_P163942 | FS417555     |
| 32990 | 389 | 10 | 865  | TAGTGTAACGTCAATCCATACTACACAACTCATCTCACAATAGCCAAGATAGGTTGC    | 32131 | A_95_P203772 | DW000646     |
| 33000 | 389 | 20 | 723  | GCAGATTCTGTATCATACCTTCCAACAATAGTATTTGGGACATATTTAGGCTGGATTT   | 32150 | A_95_P137727 | FG144862     |
| 33006 | 389 | 26 | 1053 | CATGTGGAGGAGACATTTTAGTGCCAATTAAGCATACCTCCTGATTATGGGACTTGTG   | 32162 | A_95_P012626 | TA14649_4097 |
| 33007 | 389 | 27 | 1482 | GACGAAGATTTTTGAGTTGGAGAAGCAGAGAATGGGCTCTGATGATTGTGTATAAA/    | 32164 | A_95_P016131 | TA15330_4097 |
| 33016 | 389 | 36 | 892  | CCATTTGAAAGTTGGAGACTTTGGATTAAGCAAATAATCAGGGTTCAGAACTCCCA`    | 32181 | A_95_P225792 | DV162248     |
| 33022 | 389 | 42 | 803  | AGTTCCTTCTAAAGAATGGGAATTCATTTGGATTTGGCGATTACTTTACAGATGTTG    | 32193 | A_95_P292688 | EB428119     |
| 33029 | 389 | 49 | 312  | TCTGAGATGTCTGTGTTGTCGTCTCGTCTATTTATTGCTTTTAGAATTGTCATTGGAAT  | 32207 | A_95_P094938 | BP532942     |
| 33030 | 389 | 50 | 265  | ATTCATGTAGCATATGTGGGTAGGGAGGACATAACAAGCGAACGTGTAGAAATGCTI    | 32209 | A_95_P077295 | BP527212     |
| 33031 | 389 | 51 | 214  | CCTAACCCCACTTCACCTGTAAATCTTTTGAATAAATAGTTCTATCAATGACTTGTA/   | 32211 | A_95_P062825 | BP135615     |
| 33032 | 389 | 52 | 933  | GTGTATTCAGACGGCTTTTATGTTTCTATATTAGCCTTCTTTAATTTCTGGTGGTAA    | 32213 | A_95_P176787 | TA11782_4097 |

|       |     |    |      |                         |       |              |              |
|-------|-----|----|------|-------------------------|-------|--------------|--------------|
| 33037 | 389 | 57 | 326  | CGACTCTACAAGGGATCACATTA | 32223 | A_95_P143447 | EB446746     |
| 33043 | 389 | 63 | 562  | TAGTTGATGGGACCATTTACCAT | 32235 | A_95_P188062 | TA14487_4097 |
| 33048 | 389 | 68 | 498  | AATGAATTCTCCAGTATTTAAA  | 32245 | A_95_P077380 | BP527231     |
| 33049 | 389 | 69 | 260  | GTTTGTCTCTGTCTCATGACAT  | 32247 | A_95_P099828 | BP535083     |
| 33052 | 389 | 72 | 761  | AAATCTCTTTCTTTTCTTTTCC  | 32253 | A_95_P200647 | EB438255     |
| 33053 | 389 | 73 | 817  | GCTGATACACAAGTACCGCAG   | 32255 | A_95_P119627 | DV999078     |
| 33054 | 389 | 74 | 1020 | GTGGCCAGTTACTACTGCTAAC  | 32257 | A_95_P013396 | TA14491_4097 |
| 33055 | 389 | 75 | 1211 | GCTGGGTGCTCTGTAATCCTA   | 32259 | A_95_P183712 | TA13519_4097 |
| 33058 | 389 | 78 | 697  | TTGCTGAAACTGCTGCAAGTT   | 32263 | A_95_P162132 | EH620933     |
| 33060 | 389 | 80 | 923  | CGATGAGAAAGTGGTTTGTG    | 32267 | A_95_P118317 | DV161328     |
| 33063 | 389 | 83 | 324  | TTAGCCAAGTCAAATTCAGTT   | 32273 | A_95_P072820 | BP526059     |
| 33065 | 389 | 85 | 674  | GCTCTACTGCTGTGACTGCA    | 32276 | A_95_P143387 | FG159719     |
| 33066 | 390 | 1  | 865  | TGATATCAAAACTCAAATGTG   | 32114 | A_95_P206492 | EB451957     |
| 33070 | 390 | 5  | 972  | TCTCCTATTTCTGGACATTTT   | 32122 | A_95_P013571 | TA12229_4097 |
| 33074 | 390 | 9  | 903  | ATCTGCTGTACTGGCTGTGAC   | 32130 | A_95_P201352 | TA17405_4097 |
| 33076 | 390 | 11 | 997  | TATCACTTGAGAGAAGCGACA   | 32134 | A_95_P117497 | D26509       |
| 33077 | 390 | 12 | 815  | CTAGTGACAATGGTGCCTGTT   | 32136 | A_95_P023641 | DV157838     |
| 33080 | 390 | 15 | 715  | TACGATCTTATAGATGATTT    | 32141 | A_95_P112007 | EH621684     |
| 33084 | 390 | 19 | 575  | GAAGATATACCATTTTTGA     | 32149 | A_95_P301988 | FG137041     |
| 33089 | 390 | 24 | 672  | GTGTTGATCTCTAGAGAA      | 32159 | A_95_P212987 | TA19954_4097 |
| 33095 | 390 | 30 | 553  | TAGCTGTTCTTTCAGTTTTA    | 32170 | A_95_P191372 | TA15221_4097 |
| 33100 | 390 | 35 | 1269 | GTGATGTGAGTAATTTCTAG    | 32180 | A_95_P195087 | TA16041_4097 |
| 33105 | 390 | 40 | 306  | ACAAATCTGTAGCTGCTGTT    | 32190 | A_95_P106127 | EF051129     |
| 33107 | 390 | 42 | 795  | CCACCGCCAATCAGCATAAG    | 32194 | A_95_P149502 | EB679377     |
| 33108 | 390 | 43 | 443  | CTTAGAAAGCCTGCTTGTG     | 32196 | A_95_P266036 | BP532403     |
| 33110 | 390 | 45 | 1067 | GCCACACTACTCTGTAAACT    | 32200 | A_95_P015901 | TA14246_4097 |
| 33112 | 390 | 47 | 617  | TTAGCAGTTTCCGGATTCAG    | 32204 | A_95_P283693 | EB448436     |
| 33113 | 390 | 48 | 131  | GAGGTTTTCTTCGTGTTTCT    | 32206 | A_95_P101093 | BQ843151     |
| 33119 | 390 | 54 | 751  | TAGTTATTGGATTTGCAAGT    | 32218 | A_95_P151602 | EB681839     |
| 33121 | 390 | 56 | 2100 | GGTTATTATACACTTTGCCA    | 32222 | A_95_P204512 | L38828       |
| 33129 | 390 | 64 | 767  | TGGGTACATCACCCCTTTT     | 32238 | A_95_P212017 | TA19739_4097 |
| 33131 | 390 | 66 | 108  | AAGACAAAGAAGAATAACT     | 32242 | A_95_P103822 | TA12797_4097 |
| 33134 | 390 | 69 | 997  | GGTGGTTTTGGCATGTCAG     | 32248 | A_95_P220662 | TA21655_4097 |
| 33135 | 390 | 70 | 536  | GTGCTGATGAATAGGACTGC    | 32250 | A_95_P003861 | TA12993_4097 |

|       |     |    |      |                                                              |       |                           |
|-------|-----|----|------|--------------------------------------------------------------|-------|---------------------------|
| 33136 | 390 | 71 | 783  | GAATATCTAGTGATACTATTGTTGGTTCTCTTGCATTCAAGCCCTCAATTTGCAGCAGT  | 32252 | A_95_P183437 TA13457_4097 |
| 33138 | 390 | 73 | 605  | TTCCTCTTTCTTGGATGTTGTTTGTCTGGATCTTCACTGCCATATTTAAGTGTATTTG/  | 32256 | A_95_P297623 FG635703     |
| 33141 | 390 | 76 | 750  | GATTGGGATTAGACTCTTAGTTGATTGACTGATTATTGATCAATGAACTACCAAACC    | 32262 | A_95_P119357 DV162518     |
| 33144 | 390 | 79 | 737  | CTGGTTTGAGCTGTGAAGTATAGGGGGTTTACAACCTATTATGCACAGGTCTGCAAAG   | 32266 | A_95_P154142 EC391392     |
| 33147 | 390 | 82 | 752  | TCGAACTTCACTCGTAGTTTGTATTCAAGCAAAGCTAATACAGGTTCAATTGTTGGCTC/ | 32272 | A_95_P160632 EH619299     |
| 33148 | 390 | 83 | 519  | GTA CTGCTGACTTTAGGAAA CTGAGTTAAACACAAGTTTATTGTATGGCCAAATGC   | 32274 | A_95_P201717 TA17483_4097 |
| 33149 | 390 | 84 | 763  | TGTTAATGGAACGTGGA AAA TGGATTGCTTCCCGGCTCTTCAAATGCACACTGATTC  | 32275 | A_95_P269061 EB425806     |
| 33153 | 391 | 3  | 688  | GTGCTTGAGTAATGGTCTGGTTGTCTGCTGAACTAGTTTGAGTTTGTTTAAGACGTAC   | 32281 | A_95_P154082 EB684244     |
| 33156 | 391 | 6  | 393  | CCTTCCGTCTCAAATATTTGGCATTGTTTCTACAAATAGTTGTCTTAGATCATTTGGC/  | 32287 | A_95_P094668 BP532823     |
| 33160 | 391 | 10 | 616  | TTTCAATGGAATCGATTCAATTCTTCTCGTATGGAGCTCGATTGAGTCCGACCTTTG`   | 32295 | A_95_P299628 FG641339     |
| 33161 | 391 | 11 | 827  | AACAGCTGTTCTGTAGTTGATATACCTGGA ACTGTTTGCGTACCATCGCACAGTAAAC  | 32297 | A_95_P204277 DV159675     |
| 33163 | 391 | 13 | 760  | GGTAGTCCAAATAATGGCATTGTGACTGGATCACCTTCTACGGCGAAAACAATTCAA`   | 32301 | A_95_P295798 EB448312     |
| 33175 | 391 | 25 | 823  | ATTTGTAATTCATCCTCGTTCGTCTATTCTCTGTCTAATATAACGTGCAGAATGTCT/   | 32324 | A_95_P226959 EB451706     |
| 33179 | 391 | 29 | 770  | TTGCATGCATTGATATCAAGCTGATGACGACAACTAGATGTACATGCCTCCCCTACT    | 32332 | A_95_P287983 FG162013     |
| 33181 | 391 | 31 | 285  | TAGTGGCAAATAATAAATCTAGCCACTTGCCGAAAAGCAAGAGTTGGAGACTACAG/    | 32336 | A_95_P094778 BP532866     |
| 33186 | 391 | 36 | 231  | GTTTCCTGAATGTTTTAGTGGTTTTTCTGATATCTGGTTTGGAGGATACTGGTTTTGG`  | 32345 | A_95_P121749 DW001844     |
| 33199 | 391 | 49 | 749  | AAATCCTCACAGAGTCAAAGGTCCATAAGCATTGGGGTGGCTGGTAAAGTACTGGA     | 32371 | A_95_P244682 DV157497     |
| 33203 | 391 | 53 | 842  | CGCATCAGTCTCTGTAGTTTACTCGTGATGAATCATCTATTGTTACATTTTATAAAC    | 32379 | A_95_P194287 TA15859_4097 |
| 33204 | 391 | 54 | 788  | AATGGGAAAGATGCTGTATCAATAGGGCTGTCAATTA CTGTTCCTGCTGGTGAG      | 32381 | A_95_P149352 EB679198     |
| 33219 | 391 | 69 | 582  | AGTGGTAACAAAGTGTGTTATATAACATGTTGCTGGATCCAATTTCTGGGGTTGTTAC   | 32410 | A_95_P160252 EH618948     |
| 33221 | 391 | 71 | 773  | CTCGTGTGTGATCTAGATGTTCTTAATAATGTGATGGA ACTTGATATATTCTAGTCC/  | 32414 | A_95_P149127 EB678813     |
| 33226 | 391 | 76 | 297  | TCTTCAACGTACCTCATGAGAGCCTCTTGAACGTTGGACAAATTTCTATGTATAAAT/   | 32424 | A_95_P155327 EG650013     |
| 33228 | 391 | 78 | 647  | TTTTGGTGCAATCTGGTAATTGAATATGATGTATATGGGAACCGTTGATACAATAAG(   | 32428 | A_95_P069310 BP137346     |
| 33230 | 391 | 80 | 242  | TTTTATCTGCATCTTCCCTCGTAGAGTGGCGTCTTTATAAGAAAAGACTTTCTCAGTC   | 32432 | A_95_P143512 EB446788     |
| 33233 | 391 | 83 | 397  | TGTATTGTATGTGTGTGCTCGTTAGTGAGACTCTCAAGATAGTGTTAGTGGTTTGAAT   | 32438 | A_95_P179152 TA12438_4097 |
| 33234 | 391 | 84 | 189  | CTGAAGAAGCTGCTGTGACAGAATCAGCTGTAGTAAGTCAGGAATGTGCCTCTAATT    | 32440 | A_95_P240990 AJ718050     |
| 33235 | 391 | 85 | 790  | ACACCTCAAGAGAAGCAAGAACAACAGCATTATAGAAGAGATCAGTAGAACTGC/      | 32442 | A_95_P247722 EB426856     |
| 33238 | 392 | 3  | 828  | CCATGTAGAAGAATATTACATGAAGAGGAAGGAAGAGATGTTTCAGATCTATGATT/    | 32282 | A_95_P149977 EB424911     |
| 33247 | 392 | 12 | 557  | TACTAAATGCAGCTAAGAATTACAAAGGATCCTGTGAAAATGACTTGACCTCAAGAA    | 32300 | A_95_P287523 FG637100     |
| 33252 | 392 | 17 | 457  | CAAGTGCCTGGTGCTGGTGCTGACATAATTTATCAGGCATCCTCTGGTTTTAGATGA(   | 32310 | A_95_P113532 CV021176     |
| 33253 | 392 | 18 | 375  | TGAAATTGCTCAGGATTTCAAGACTGATCTGCGTTATCCAGAGTCATGCTGTGTAGG(   | 32312 | A_95_P110582 EB443620     |
| 33256 | 392 | 21 | 442  | CGCGTCAGTTTTCTCTGTAACATTTAACTTGTGGCTTACGTTAATACACTTAACTCCC`  | 32318 | A_95_P099633 BP535009     |
| 33258 | 392 | 23 | 350  | CTACACTGTATTGTTGACCTCTGTAGAAAATTGCAAATATGGCCCTTATTTAAAGTGT/  | 32321 | A_95_P163722 EH622810     |
| 33261 | 392 | 26 | 1315 | TCACAGATGACAATCAAAGAACGTGGTGGCAATAGGAAAACACAGAGGCAGAGATG/    | 32327 | A_95_P196327 TA16315_4097 |

|       |     |    |      |                                                              |       |              |              |
|-------|-----|----|------|--------------------------------------------------------------|-------|--------------|--------------|
| 33265 | 392 | 30 | 573  | TTTCCCCTTGGCTTGTGGACAGTATAACATGTGCCTTACCTAAATAGAGGCAGAATTT   | 32335 | A_95_P188837 | FG640417     |
| 33270 | 392 | 35 | 621  | CCATCTGCAGGAACTATTTTGATGAATACTACAGCTTTTTATCCACAACACTACTCAGT  | 32344 | A_95_P018871 | EB435759     |
| 33273 | 392 | 38 | 806  | TACTCTATCAAAGGGAGTTATTTTGGTATATGTAATTTGACAGTAGAGTTCTTGGGT    | 32350 | A_95_P191557 | TA15263_4097 |
| 33282 | 392 | 47 | 575  | TGCTCATCTGGTGAAGTCTGATGTATTACTGTTGTGTTTATGTGACCTAAAGTTAGTG   | 32368 | A_95_P219262 | TA21359_4097 |
| 33285 | 392 | 50 | 573  | GTTTTGCGGATTTACGACTGGAAACCACCATTCTATATTACCGTGCTCCTTACTTCCT   | 32374 | A_95_P019991 | TA12644_4097 |
| 33288 | 392 | 53 | 889  | ATTTTTCTGTCCTTGGGTAAATGGAAATGTTGCTGCTGCTGGCTGCAGTAGTGGCAC    | 32380 | A_95_P213892 | DV159446     |
| 33292 | 392 | 57 | 708  | CAGGGAAGTTGACCCATCACATATTTCTACACTTTGTTGTTGTAAATTTCCAATTTTT   | 32387 | A_95_P188332 | TA14547_4097 |
| 33295 | 392 | 60 | 803  | TTGGTAGTATCATATACATTTTCATCTAATCCGCTTCGTGATAATGCAATGGTTTATG   | 32393 | A_95_P013541 | TA12651_4097 |
| 33300 | 392 | 65 | 238  | GCTCTGATACTGTATTACAGACAATTCAAATCATTATCTCACTTTCCCTATAAGAAGG   | 32403 | A_95_P093973 | BP532509     |
| 33302 | 392 | 67 | 804  | ACACGTGTCATTCTGTTTCACTTGTAGATCTAGTATGTAATTTCTCTAGTACCACATTT  | 32407 | A_95_P290933 | FG165317     |
| 33303 | 392 | 68 | 667  | AAGGTGCTGGTATTCCGCGACTATACTTCTCATATTAATCCTTACATCTAATCTTAATGA | 32409 | A_95_P029586 | EB450630     |
| 33305 | 392 | 70 | 1348 | GTTGGAATTCCTACTAAGTTTTCTGGTGCTCTGTCTTGGTCAAAGGACGTCCATGCT    | 32413 | A_95_P007541 | TC55092      |
| 33308 | 392 | 73 | 889  | GCTTGATTCACTTCTGAAATTTGCTTTATTGCCCTGAATATTAGTGACTGATTAC      | 32419 | A_95_P022701 | TA15300_4097 |
| 33313 | 392 | 78 | 501  | CAGTCTTAGTTGCCCTTATATTATAAACTTGATTCTTGTGGCACCATTATTATACGTGG  | 32429 | A_95_P132327 | EB432791     |
| 33317 | 392 | 82 | 1044 | CAGGTTAATGTTCTATCTAAAGCTTTCTTGTCCATATCAAGTAAAAGATTTCTCGTG    | 32437 | A_95_P007681 | CK720596     |
| 33320 | 392 | 85 | 818  | AGGTCATTGATAGATCTCCGAATCTCAGTTCCTCGAACTTCTTTTATCAAATGA       | 32443 | A_95_P267856 | DV162283     |
| 33323 | 393 | 3  | 783  | TTTGACACCATGAAAGAAATTTGGCGCTTCAGCAAATCATCTGCCGTGTTTCTCCTCAT  | 32448 | A_95_P248197 | FG160346     |
| 33329 | 393 | 9  | 847  | CCTCATTGCTTAGAGACATGTAATTTACGTTGCAATGGTCAGTTTGTATGAATAT      | 32460 | A_95_P151507 | EB681722     |
| 33331 | 393 | 11 | 2598 | GGTCAGATTGAGTGGTGTTCGGGTTATTGCCTATTTATTGTAAGAATTCTGTATTGA    | 32464 | A_95_P194047 | AB120519     |
| 33337 | 393 | 17 | 581  | CACCGTTTACTCAGACTAATGTTTTGCTCATTGATATCACGAGTGTGTGTGTGTAT     | 32475 | A_95_P100998 | BQ843069     |
| 33340 | 393 | 20 | 780  | TTCATCAAGTTCTACTATGTGAGCTATCTGGTCTAGTGTAAAGACTTTTGTGACTTTT   | 32481 | A_95_P157632 | EH615687     |
| 33341 | 393 | 21 | 487  | AGCTGTTATTCCACTTGTGATTTTTGTTCCCTTAGGGCTCCTTATTAATGTTTGTACTG  | 32483 | A_95_P001931 | FG158502     |
| 33343 | 393 | 23 | 687  | GCAGCATCTCAGCTGTAGCTTAGGTAACACTTTGGCACAAAGATGTTGAAAAAATG     | 32487 | A_95_P147332 | EB451691     |
| 33344 | 393 | 24 | 838  | ATTAGTAGAATGCAGTACACTCCAGGAAAGCTAATTAAGAATCTTGGGTCTTCGGTC    | 32489 | A_95_P184432 | EB679902     |
| 33348 | 393 | 28 | 142  | ATGGCATCTCCTCCCTATTTGGATTTCTCTAAAGAACAGAGAACAATCGAACCCCT     | 32497 | A_95_P131172 | EB431301     |
| 33355 | 393 | 35 | 884  | GACATGCAGCTCTATTCTCAGTTGTCGTCATCAATTCTGTGATTTATGTAACATATTC   | 32510 | A_95_P229054 | DV160959     |
| 33356 | 393 | 36 | 771  | GATGGCACATTAATCGTAGGACTAGCGTTCATTTGGCACTTTTATGAAACAAAGA      | 32511 | A_95_P022981 | TA15621_4097 |
| 33362 | 393 | 42 | 510  | AGCTGTTAGCTAGCGCGTAAACACCAGCATATTCTATGGTTTTGTATCTGAGTGTTAGCT | 32523 | A_95_P048491 | BP131925     |
| 33368 | 393 | 48 | 366  | ATGGGAGATTATCCTGAACGTATTCTCTATTAATCTGACTTTCTTGAGAGGATTCCTG   | 32535 | A_95_P182717 | TA13286_4097 |
| 33370 | 393 | 50 | 813  | AATAGGGAACCTTATTAGTGCCGCTTTTCTTGAATTTTTCGTGCATGGAGGGAGAA     | 32539 | A_95_P158042 | EH616101     |
| 33383 | 393 | 63 | 1407 | ATTGTTCTGGGGATTGACTATGTCTGTTTGAATATAATTGCGGCACTGCCCTGTG      | 32564 | A_95_P028806 | TA18865_4097 |
| 33388 | 393 | 68 | 592  | TTGTAAGATCATTAAACATGCTGTCCATTCTGTTGTGAGACTTTGAAATGTCTTTCC    | 32574 | A_95_P030341 | BP534288     |
| 33391 | 393 | 71 | 269  | TGTAATTCTGTACAACCTTCCACGTTTTGTGTTTCAAGATCTTTCGATGCTTCAATAAA  | 32580 | A_95_P027576 | CV019980     |
| 33395 | 393 | 75 | 727  | TGTTTTAGGCTCCGAAGCACGTGAAATGCCGTGTAACACATCTACCATACCGACTGT    | 32588 | A_95_P139122 | TA13961_4097 |

|       |     |    |      |                                                               |       |                           |
|-------|-----|----|------|---------------------------------------------------------------|-------|---------------------------|
| 33396 | 393 | 76 | 290  | GTCTGAAGGTCATGATGGCCAAGTGAGTTCCTCTTCTGCAATTTACCTTTTTACACI     | 32590 | A_95_P058586 BP134512     |
| 33397 | 393 | 77 | 817  | AGTTCCAGTATATAAGCCACCAGTAGTAAAGCCACTGCCTCCTCCAGTTCCAGTATAC    | 32592 | A_95_P029951 EB425421     |
| 33400 | 393 | 80 | 711  | TCAGATGCTACTGCAGAAGGGCCAACAGGAGGAAGTACTTCTTATGCCTCAAACATT     | 32598 | A_95_P302638 FG199999     |
| 33401 | 393 | 81 | 1494 | CGGAGGTCATATAAGTTACACTTGATTCACTTGTGCTGTAATTTCTTCAGTCAATAAC/   | 32600 | A_95_P193732 TA15734_4097 |
| 33404 | 393 | 84 | 527  | CCGCGGCACCGCTTGTGCGAAAAATTACTAAATATATTTATTAATACTGTACGGAA      | 32606 | A_95_P063795 BP135877     |
| 33410 | 394 | 5  | 685  | TTCGACTTTGGAATTGTCTGTTTATCTTTCTACTGAATTGTTCTAGTGGAAATGCAA     | 32453 | A_95_P014081 TA14640_4097 |
| 33420 | 394 | 15 | 618  | ATATGTTTGGTCACGTCTTTCCGAGACAACGGCTACATTGATATTCTCCCAAGGGAC     | 32472 | A_95_P286838 FG642798     |
| 33422 | 394 | 17 | 124  | GAAATTGAAAAGTGGTATAGTTCGTTTATAGTAGGATTGACTCTCTGGAATCTCC/      | 32476 | A_95_P099948 BP535139     |
| 33426 | 394 | 21 | 205  | GTGGTTAATATGTCAAGCCACATCTGGAATGAGTAACTTCTGAAGTTTACATTTA       | 32484 | A_95_P140497 EB444396     |
| 33427 | 394 | 22 | 464  | CGTCAAGTTCCTTTGTAACCTGTGCTTACACAATTTAAATGATGACATTAGAAGTGC/    | 32486 | A_95_P027741 CV017334     |
| 33430 | 394 | 25 | 762  | GTGTATTTGTTTGCAGTGTGATGGTAACTGAACATACGACTGCAATTTCTTTAATT(     | 32492 | A_95_P231639 DV999209     |
| 33435 | 394 | 30 | 779  | ATCGGTTGAGCTTAAACATTGAGAGCTAAGTTATTTGTCTGACAGTCTTTGCTTTTC/    | 32502 | A_95_P234614 EB440260     |
| 33436 | 394 | 31 | 404  | TTTATCTGATGAACAGAAGTTTTGGTCTCCAGTGTGGACATGGAGTTCGCAAAGGTT     | 32504 | A_95_P091993 BP531595     |
| 33439 | 394 | 34 | 174  | GGTAATTCCTCCACTCAAGGTTAGGCAAGATACTTATCTCGAAACCGCATAATTTCTT.   | 32509 | A_95_P066330 BP136571     |
| 33444 | 394 | 39 | 1135 | GGGGCGGACTTATTATCCACTTATTTGAATTGTGTGTCAGGGTTGTTTCTCGTTCATGAA  | 32518 | A_95_P192472 TA15458_4097 |
| 33445 | 394 | 40 | 615  | TACTGGAAAATTGCCTTGAGAACGGAAAAATGGGGGAATCTGCTCCTTTTGGCGGTT     | 32520 | A_95_P161507 EH620230     |
| 33462 | 394 | 57 | 704  | TGTGACTATGAGCACTGGTGTGCAAACTTGCCTTTTGTCTTTTATATGCGCCTTGC      | 32554 | A_95_P029451 TA16734_4097 |
| 33467 | 394 | 62 | 472  | GTCCCTAATGTCTCTTGGAGTGCAAACTAAAACTTTATAAAAAGTTGATCCACTTGG     | 32563 | A_95_P231659 TA21544_4097 |
| 33476 | 394 | 71 | 752  | GATTAATGAGATTTAACGTGTGTCAAACATTTACTAGTAATAGTTTACGACTGTGTC     | 32581 | A_95_P012246 TA12837_4097 |
| 33477 | 394 | 72 | 557  | CAGAAAGTGGAAAGTAAACTAGTGTCTACTTATATATCAACTTTACCTGGCCTTTTAA(   | 32583 | A_95_P162652 EH621646     |
| 33483 | 394 | 78 | 464  | GTGCGGAAGTCTATGAACCTATTCTAGAGTACTTCATGAGATATTTCCCTTTTGTG(     | 32595 | A_95_P077370 BP527229     |
| 33484 | 394 | 79 | 198  | AAGGCAATATGCCGCGACTTTGCCTCCGATTCTTTGAATTATGTCTTTTATGCTT       | 32597 | A_95_P146462 EB450529     |
| 33486 | 394 | 81 | 901  | GGTGATTGAGGCTACAGTGATTTGTGTGATTATTTGGAGTCAATTATTGATGAACTA(    | 32601 | A_95_P234674 EB679714     |
| 33496 | 395 | 6  | 448  | CTGAAAACAGCATAATGGTGATTCAAGCTCCTCCTTGCATCTGTGAACACTTC(        | 32620 | A_95_P261966 BP134254     |
| 33499 | 395 | 9  | 537  | GCTTTTCCTTCAGAAGTGTGTTTCCATCATACTCCATGAAAATTGCATTGAGAAG/      | 32625 | A_95_P025926 EB683701     |
| 33501 | 395 | 11 | 780  | ACTATTCTACGTACCTGCTATATGTCATCTTGTATCGTGTAACTCTGCTATTAACCTG/   | 32629 | A_95_P136562 EB440327     |
| 33502 | 395 | 12 | 453  | CAAGTATCCTTTGATAGTGATGCATTCTCAGAGAGCAGTCAAAGCTTATAGAAGAG      | 32631 | A_95_P106972 EB678624     |
| 33508 | 395 | 18 | 643  | GCACGATGAGAGAATTTCTTTTAGAAGTTTTCCCTACCTACTTTTACCATATAGCTT     | 32643 | A_95_P162302 EH621253     |
| 33514 | 395 | 24 | 784  | ATAGATGTTGGAGAAGCAAAATGTCGTCAAGTGGTTAGCGGCCTGGCAAAGTTTTG(     | 32655 | A_95_P200907 EB679375     |
| 33516 | 395 | 26 | 1064 | GAACAGTGTTCCTCTAGATATGGAGTACACTATTCATCTCACTACTTACTATTCATGCA/  | 32658 | A_95_P024511 TC65064      |
| 33521 | 395 | 31 | 187  | TTATTGCTTACTCTTTCACCTTTCATTTCTAAATCCGGCTCGCTCCCGGCTACGGTTTGG/ | 32668 | A_95_P143862 EB447050     |
| 33528 | 395 | 38 | 914  | AGCATTGTTTTATTCTGTAGACAGTCTGCGGAGCGTGTGAATATAAGAGATGATTAG     | 32682 | A_95_P208857 TA19061_4097 |
| 33532 | 395 | 42 | 441  | ACTCATTACACTTGCAATTGGTGAAGTGGTTTTTCTCCATCTTTTCTGATTTTTACCGT(  | 32690 | A_95_P260426 BP128766     |
| 33533 | 395 | 43 | 742  | CTTGGATTTACCATTGAGTCAAAGGATTTCTCTAACAAAATGTTTGCCTGTTCTACCC    | 32692 | A_95_P190302 DV160394     |



|       |     |    |      |                                                             |       |                           |
|-------|-----|----|------|-------------------------------------------------------------|-------|---------------------------|
| 33538 | 395 | 48 | 495  | CGTTCCTCTTTCATATTTTCACCTCGAACTTAACTAGGAGCTTTCACCTCAAAAAATA  | 32702 | A_95_P231519 FG644421     |
| 33542 | 395 | 52 | 852  | GACAGTTGCGCCATTTGTAAGTATGTTATCTTGCCATATATTCTGGAAAGAAATCTA   | 32710 | A_95_P272821 EB678607     |
| 33545 | 395 | 55 | 268  | TTGGAGAGATCACAAACCAAGCCACTGTCGACTATTAGAAGATAGTACGTGACACATG  | 32716 | A_95_P004741 EH663814     |
| 33548 | 395 | 58 | 898  | TTAAATTTAGTCTTTGGATCTACTATGCCGTTGCCTCTGTTTTGGCCTTTTGGGCT    | 32722 | A_95_P237019 DW001784     |
| 33550 | 395 | 60 | 923  | TAAGATTTGTATCTAGATTGTGAGAGAACACCATCATTCTGTACAACCTGGGTTTGC   | 32726 | A_95_P207942 TA18857_4097 |
| 33551 | 395 | 61 | 734  | CAAAAACAGGGCTAAGAATGCAGGAATAAGCAATGATCCTTCCCCAACAACTTTTGA   | 32728 | A_95_P152962 EB683281     |
| 33552 | 395 | 62 | 1308 | TAGAGTTTGTAGGATTTTACTGGGCCATCATTGTTGTTGGCGTTCTCGTAGAGTTGTG  | 32730 | A_95_P026671 TA14564_4097 |
| 33555 | 395 | 65 | 510  | GGTATTTTCGGTCCTACACGACCCCAACTCGTATAAAAGGGGTTCTAAATCTAATTTG  | 32736 | A_95_P028211 EB434870     |
| 33557 | 395 | 67 | 850  | CCTTTCAGTTTCATTTTGTATGTATATGTCCTGTCATATTGTTGTTGACACTCGGC    | 32740 | A_95_P206787 TA18594_4097 |
| 33558 | 395 | 68 | 0    | CTTTGTTGAACCTTTGCTACAAAATGGAAGTGAAGAAAGTCTATCTATTACCTAGCGGC | 32742 | A_95_P243282 A_95_P243282 |
| 33560 | 395 | 70 | 882  | ATTGCATTGTTTGCCTAATGATGGCCTTTTGTATCTTATTCTAAGTCCGTTA        | 32746 | A_95_P207852 TA18834_4097 |
| 33562 | 395 | 72 | 706  | AACCCTGGTTGCTTTCGTCTTCGTTGAACTAACGAGTGTCTCTATAGCATTTCGAGCA  | 32750 | A_95_P123467 DW003324     |
| 33566 | 395 | 76 | 391  | ATTATTTAGGAGGCTGGCATGTTGACCGACTTTAGCATAAATCAGTTGAACAAATAT   | 32756 | A_95_P094308 BP532663     |
| 33568 | 395 | 78 | 550  | GTTTCTCCTGCTCATGTGAGGGGACTTATGGGAGTTCGATCCAAATAGCAACATGT    | 32760 | A_95_P145712 FG145527     |
| 33572 | 395 | 82 | 793  | GAGCATCCTTTGTACTGTGGATAATCTGAACATGATTACTATTCTATCAAGGAACTGT  | 32768 | A_95_P010561 TA12867_4097 |
| 33574 | 395 | 84 | 456  | GATTCATTTAGTGGTCTGTTGCTTATGAATACTTCTCCACAATCCACATTCTATGA    | 32772 | A_95_P275633 AM794030     |
| 33577 | 396 | 2  | 801  | GGTGAGTGATTCCACTTGTCACTTTCACCTATGAATCCATGTCATTATTTATTTGC    | 32613 | A_95_P244332 EB681743     |
| 33578 | 396 | 3  | 631  | GCCTACACCAGTGTGAATTCGTCTATCCTGGGAGGAAATAATCTATAACCTTGGGT    | 32615 | A_95_P261536 BP132658     |
| 33581 | 396 | 6  | 675  | TTGACCTGTGTGAGACTTTGGAGAATATGGTCGCCCATGATATCCAGAATGGGCTT    | 32621 | A_95_P061635 BP135311     |
| 33582 | 396 | 7  | 740  | CATCTTTGAAGGAAGGTTGTTATGGACTTTTTGACAGTATAGATATTAAGTCTCG     | 32622 | A_95_P188857 TA14662_4097 |
| 33584 | 396 | 9  | 796  | CTCGCAGAGTTTAATCCAAAAGGTGGACCTGTATCCAATTTACTCAAGTTCTTGTGTG  | 32626 | A_95_P137277 EB440987     |
| 33585 | 396 | 10 | 176  | GAGGTTTCATCCCTTGTAATATCACCATCTAAAAAGGTGAAAGACCAATTCCTTGCTA  | 32628 | A_95_P045361 BP131117     |
| 33588 | 396 | 13 | 927  | CATTTCTCGGGATCATCCTATTTTACAAAAATGTTGAATGCAACTGCGCGGGATTAT   | 32634 | A_95_P186582 Y16644       |
| 33590 | 396 | 15 | 1103 | GAGAGAAATTTGACGTTACCTGAACTGTTACATCAAGTGAATATCCATCATCTGA     | 32638 | A_95_P030831 TA13620_4097 |
| 33597 | 396 | 22 | 93   | ATAAACACTGCGGTTTATGGTGTCAACATCTGTATGAATACGCACAACAGCAACTCG   | 32652 | A_95_P106122 CV017766     |
| 33598 | 396 | 23 | 333  | CGCCCCCTTGGATTCAATTTTAAGCATGCTTTTATGGAGTTTTTGGGCTGGAATTTT   | 32654 | A_95_P062525 BP135537     |
| 33605 | 396 | 30 | 558  | TAGTGTTACAGCTTTGCTGAGAATATGATTGGAGAAGTGAAGTACTGAGATACCA     | 32667 | A_95_P024791 TC65629      |
| 33606 | 396 | 31 | 314  | GTAACCCCTGCACTTGTCTAAAATGAACAAATTACATCTTATTTAAGCAGAGATGGA   | 32669 | A_95_P109182 TA11726_4097 |
| 33610 | 396 | 35 | 129  | CTGTCTGTAGTTATCAAGAGGATTGCAAATTTGACATTCTGTAGCTTAAGTGCGAAT   | 32677 | A_95_P004681 EH623011     |
| 33611 | 396 | 36 | 555  | TATAGACACATTCTAAGTCAGTTACCAGTATTATTGATTGTCACATCTGACATTTCCC  | 32679 | A_95_P055586 BP133737     |
| 33613 | 396 | 38 | 427  | GCTCACCATAAGTTTGTAGCATGCTTGTACACCTTTAGATGTTGGTTTGGTCAAGGGAT | 32683 | A_95_P078685 BP527577     |
| 33617 | 396 | 42 | 557  | CCATATGTTGCAAGTGTACAGATGGGCGGAACATACGTATTGCATGCGAGAGATGT    | 32691 | A_95_P220522 TA21625_4097 |
| 33619 | 396 | 44 | 680  | CGCTGCTTGTAGCACACAGATGTTGCAATCTCTTGTACAATGAGGCCATTTATGACAT  | 32695 | A_95_P259691 EB441978     |
| 33621 | 396 | 46 | 775  | TGGAGTCGTTGCGAAGTACTTTGGAGAAAGTAACCCAAGAAAACAAACAAGCTAAG    | 32699 | A_95_P287633 DV162026     |

|       |     |    |      |                                                              |       |                           |
|-------|-----|----|------|--------------------------------------------------------------|-------|---------------------------|
| 33625 | 396 | 50 | 471  | GAATTGATTTAAGCCTTACATTAGGTCAATAAAAGCGACCGTGCTAGAACCCACGGGA   | 32707 | A_95_P212432 TA19835_4097 |
| 33629 | 396 | 54 | 1629 | AATCTGCACCGTATTTGTTATTGTTTTTCAGCAGTTGAGATTGAAGTTTCTTGCATATTC | 32715 | A_95_P026006 TC63890      |
| 33634 | 396 | 59 | 373  | TAATCCAGAAATTTAATAGCTGAGAATCTGGTTCCATCAACAGTTGTAGACCTAGAA    | 32725 | A_95_P219072 EB429767     |
| 33636 | 396 | 61 | 444  | CATGTTGCACTCAATAAGCTCCCATCTTTCAGACTGTCATGTAGCAAATGTTTCATCGA  | 32729 | A_95_P081805 BP528356     |
| 33643 | 396 | 68 | 430  | CTCGAATCTAAAGCTTGTTTTTCAGTTTAAAGTGGGCGTTTTGGACATAAGAGTTGTAAA | 32743 | A_95_P021206 TA16556_4097 |
| 33647 | 396 | 72 | 641  | GTGTTGTAGAGCTTATGATTTCGGTATTACCAGTTCTAGGGAGTTGTATTATGATTTGA  | 32751 | A_95_P216587 TA20739_4097 |
| 33652 | 396 | 77 | 311  | GACCCCTTTTGTTCGAGGAGTATTTGGAGTTGCTTTATTTAAAAGTGTGCTAAAAGT    | 32759 | A_95_P142507 EB445957     |
| 33653 | 396 | 78 | 513  | AAGTATAGTTAAGCGAGCTGCTGCTCCTGCCCTATGAAGAAACAAAAATCTAAGAA     | 32761 | A_95_P085385 BP529267     |
| 33655 | 396 | 80 | 875  | TAATCAGTGATGATTCACGATACATGACCGAACTTCCATCTTGTGCGATGGTGCCCA    | 32765 | A_95_P227899 EB425854     |
| 33659 | 396 | 84 | 479  | CTTCAAGTTCTGACGATGATGATAGAGAATCCAGAAAATCAAGGTCTAAGTCCAAGA    | 32773 | A_95_P055926 FG638526     |
| 33663 | 397 | 3  | 169  | ATAGTTAGTTGAATGTGTTGCTGATGGTGGCAAGAGAGGGTTTATACTTTTGGTTGT    | 32780 | A_95_P034384 AJ718656     |
| 33664 | 397 | 4  | 127  | AGTCTTTTCCATTTCTTGATTTTTGATGTAATAACGGGACTGCGGACCGGAACCTCG    | 32782 | A_95_P132642 EB433192     |
| 33666 | 397 | 6  | 806  | TTATCAGGAAATGAAGAACTACTAACATCGAGAGGTTTGTGCTGGTGCCGCAGCT      | 32786 | A_95_P271561 EB680569     |
| 33667 | 397 | 7  | 933  | CCTGTAGGAAGTCATGCACAGATAGGTCGATGATTTGTGTTCTTGAAATTACATTA     | 32788 | A_95_P210552 TA19421_4097 |
| 33669 | 397 | 9  | 255  | CAAATCTTTCGACTTTTGCAGTTAAATGGAGAAAACGAGATTAACCATCTTGTAGT     | 32791 | A_95_P183887 TA13558_4097 |
| 33671 | 397 | 11 | 459  | AACGATATGAAGTTTCTATTCATATCTTTGAATGTGGACCTCTATCAGTTCGGATGG    | 32795 | A_95_P114012 CV021400     |
| 33675 | 397 | 15 | 403  | GCACTAAGATCATTGAGGACGAAGATTAAGCTATCTATCAGTAGTGGAGAATGATTA    | 32803 | A_95_P001426 FS435766     |
| 33678 | 397 | 18 | 1123 | AAATCCCCTTGTGGATTCTGGCTCCGCTCTGTTAATTGTACTTTGTATCCATAGT      | 32809 | A_95_P223477 TA22259_4097 |
| 33680 | 397 | 20 | 552  | ATAAAGTTGGTTGTCTTTGTCTGTACCACATTGTGTACAAGTCTCCTATTGGAAAAC    | 32813 | A_95_P006086 BP129770     |
| 33686 | 397 | 26 | 491  | CGGCTACTTTGAGCAGTCGCTTTGATAGTAACTGTTTTGACTATGTTTGTAGTTGCT    | 32825 | A_95_P121557 FG639297     |
| 33692 | 397 | 32 | 589  | ATTGTTGGTTTACTTCTTTTTTAACATTCATATTTTGGTCAACCCGTAACACGGGAGTT  | 32837 | A_95_P153362 EB683645     |
| 33693 | 397 | 33 | 409  | AAGAAAAACATTCTTGGATGGAAATTTTTACAAAGGCAGCCAAGTGCATCAGGGGAT    | 32839 | A_95_P213922 TA20151_4097 |
| 33695 | 397 | 35 | 622  | GACAACGATAATCACGGCATCAGGATTATTGGAACAGTTTTAACATTAGTTGAACAA    | 32843 | A_95_P203637 TA17895_4097 |
| 33696 | 397 | 36 | 717  | ATAGTTGGGTCAATCCCTAATATGCATCCTCTATCCCTATTCTTCTATCCAAGTTGA    | 32845 | A_95_P246102 DV999520     |
| 33697 | 397 | 37 | 950  | ATATAATGCAGCCCGACCATTTGGATCAAGACTTGCTGTTGAGTTGAGCCATCTTGCTT  | 32847 | A_95_P212512 TA19852_4097 |
| 33703 | 397 | 43 | 316  | ATGTGTGGGTATCGGTGGTTGGATGTTCAATCCATCTGTTAGTGAAGCAGTTCAATTC   | 32859 | A_95_P143467 EB446762     |
| 33704 | 397 | 44 | 0    | AAATGTGCTAAAGTGCCTCTATCTTAAACAGGGGACTCAAGCCCTGTTAGTGAGCAT    | 32861 | A_95_P303643 A_95_P303643 |
| 33707 | 397 | 47 | 659  | TCAACTTCTTCGTGTTGAGCATGTTCTTGGATACTCTGTTCCAAATCACCGTTTGTGCG  | 32867 | A_95_P221787 TA21893_4097 |
| 33712 | 397 | 52 | 462  | ATTGCATTTAGTGAATTCCTCCAGTGAGGTGGTTTGTGAATATGTCTCTGGCCAGAGT   | 32876 | A_95_P078755 BP527595     |
| 33713 | 397 | 53 | 755  | TGTACGGAGTGAGGGTTGTAAGTGTTCATATGTAGCATCTTGTGCTGTTGCATTCTC    | 32878 | A_95_P179737 TA12574_4097 |
| 33714 | 397 | 54 | 728  | GGACCAGTCGGATCATTTTTCAAAGACCCAAAAATTTCTTCTTGAACACATTGAGC     | 32880 | A_95_P273586 EH623052     |
| 33717 | 397 | 57 | 504  | GCAGCTTTGAGGAGCATTTTGCTTTAGTTGATTATATCCGACTTCATTCCTTCTA      | 32884 | A_95_P290948 DW001994     |
| 33719 | 397 | 59 | 495  | TACCTCGGGGCTTACTAATAATTTGACATTAGAGTTTGGCCCGGCTTTATTTCCCTGT   | 32888 | A_95_P031521 EB428123     |
| 33726 | 397 | 66 | 579  | CTTTAATTTTAGTTTGTGGAAGTGTGTTGAATTAGAATAATAATGGACTGTTCCGG     | 32902 | A_95_P303368 FG635441     |

|       |     |    |      |                                                             |       |              |              |
|-------|-----|----|------|-------------------------------------------------------------|-------|--------------|--------------|
| 33731 | 397 | 71 | 618  | CAACTTACCCTATTGTCTGACTTTAGGGGCAGTTTGTGGAAATGTTACTTAGCTTCTT  | 32912 | A_95_P005096 | EB438050     |
| 33735 | 397 | 75 | 586  | TTCTCTATCCCAACAATGTGGAGAAGCGTGGGTCTTAAAGTCAATAGGAAAGAAATG   | 32920 | A_95_P064550 | BP136082     |
| 33737 | 397 | 77 | 640  | TTACAGACCTGGATCTTGTGGGGCTTCGTCTCAAATCTGGTGGTATGTCAAATGAA1   | 32924 | A_95_P160697 | TA13067_4097 |
| 33741 | 397 | 81 | 135  | CTAGATTTGCAATATGTCTGGTTAAGGAAGATACTTGGTTATCAGTGCTTATAGAACT  | 32931 | A_95_P130212 | EB430248     |
| 33743 | 397 | 83 | 554  | TGGATGTTGAAGCACTTAACCCCTAGCTTTTTGTAATTTGTTGCTTCAGAATGAAAAT  | 32935 | A_95_P303523 | FG639260     |
| 33744 | 397 | 84 | 936  | CTTCTGCATCTTGTAATAAATTGTAAACATTTGACACTCTAAGGAGAAGGCAATATCAA | 32937 | A_95_P015126 | DQ676843     |
| 33745 | 397 | 85 | 437  | GCATGAGGGACTCAAGTCTAAGATCCACGCTTATGATATAAAAATACCACATAAATG   | 32939 | A_95_P074160 | BP526396     |
| 33746 | 398 | 1  | 565  | GTCCAGTTAGGGTTGCATTTGAAATTTGTGGTATGTAATGGACATCTATATCAAGAA   | 32777 | A_95_P026886 | FG636167     |
| 33747 | 398 | 2  | 786  | GCTTGTGGTACCAGAGTTTAGTTCTGAGGACAATTGAAATGTCTCTGTATTTCAAGA   | 32779 | A_95_P232829 | EB681870     |
| 33749 | 398 | 4  | 704  | CAACTTGTATCTAAGGCAGCTAATCATATAGTCATGGATTCTATATCCTCTTGCAA1   | 32783 | A_95_P121262 | TA14088_4097 |
| 33757 | 398 | 12 | 786  | TGATAAGCATGTTAGCCTCCGCTTTCTACCATATCTGTTTGACATGTCATAAATTATT  | 32798 | A_95_P227299 | EB425838     |
| 33759 | 398 | 14 | 841  | TATGATTACTGATAAAAAGTCCCGTCTTCTGCATGATCGTGAATATCATCGTAGA     | 32802 | A_95_P250272 | FG146441     |
| 33762 | 398 | 17 | 464  | ATATTACCGTGACAGTCTGATGTAGATGGTCGTAAGAAATGTCATAACGTGCAAAC    | 32808 | A_95_P114277 | CV021525     |
| 33763 | 398 | 18 | 859  | ATCATTTGTATTGCTGGGCTGTCCGGCTGACTATGACCTTTGTGAAAAATCCTGCGTC  | 32810 | A_95_P272101 | EB447618     |
| 33764 | 398 | 19 | 189  | ATATTTGGATATGGCACCCCGAGAGGGAATTGCAATACCCAGTTTGTGGATCAAGA    | 32812 | A_95_P098603 | BP534568     |
| 33769 | 398 | 24 | 374  | AAGTCTCATGATGGGTCTCAGATACCAGGTAGCTTCTTTGAACCGAATGCACAAGAG   | 32822 | A_95_P081960 | BP528395     |
| 33771 | 398 | 26 | 817  | GCTGCAGTTCCTGTTGTTTGGTTGAGAATAGTGGGAGATGCAACAAGAATGAAAG1    | 32826 | A_95_P200122 | DV161462     |
| 33773 | 398 | 28 | 1166 | TGCAATCTATTGCATCAAATTAATTTGGACCTGCAGTAGAAGTTGACTTTGCATATGA  | 32830 | A_95_P026061 | TA12472_4097 |
| 33774 | 398 | 29 | 370  | TGGCTAATGGTTGGTGTGCTGGCACTTGGGCTTGTTCATCTGACTAECTTAAGGACA   | 32832 | A_95_P110772 | CV019890     |
| 33776 | 398 | 31 | 796  | TCTCTGGAGATGATTGTATTGCTGTTAAGAGTGGCTGGGACGAGTATGGAGTTGCAT   | 32836 | A_95_P138702 | TA14953_4097 |
| 33779 | 398 | 34 | 687  | TTGTAATAATCAAAAGCCTTGGTGCAGAAAAAGTTCATAGAATGAAAAATCAGCACA   | 32842 | A_95_P037706 | BP129074     |
| 33781 | 398 | 36 | 436  | GCAAGAAAAACAAGCAAATTGCTTGGCCGCTTCACTATTTACATTTACTCTATTTTGA  | 32846 | A_95_P001781 | TA17156_4097 |
| 33785 | 398 | 40 | 315  | ATACAAGCAGAGTGTTATTGAACAATAGAAGCGCGGCATACAGATGTTATCATCTGT   | 32854 | A_95_P027531 | EB431655     |
| 33786 | 398 | 41 | 702  | AGCTAGTCGAGATGCCACCCTATCCATGTCAATTTGCATTGGCGTGTGTAATTGGTC   | 32856 | A_95_P268386 | EB677398     |
| 33788 | 398 | 43 | 668  | ATCTGAAATGAGTCCGGATACTCGTGTTAACTGTGTAGCACCGGGTTTGTACCTACA   | 32860 | A_95_P252294 | EH616432     |
| 33792 | 398 | 47 | 850  | ACAAAATAGTGATCCGCTCCTATCATGCCACCTCAGTGTGTTATGCTGCTCTCATCAC  | 32868 | A_95_P300513 | FG159785     |
| 33794 | 398 | 49 | 800  | GATGTGATGCCTTCCTTGTACTTGGTTCATCTATGATGACCATGTCTGCTTCCGGCTT  | 32872 | A_95_P117017 | DV159809     |
| 33797 | 398 | 52 | 328  | TGGGAAGCATTGTGTGAACCCCTTCTTTGGAGAAATCTTGTGAGGTTATTCTCTTAG   | 32877 | A_95_P040866 | BP129944     |
| 33800 | 398 | 55 | 719  | CTCAAATTCCTTAATAAGGTATGGCATATTTTGTAGGCCCTTCCATTTTGTGGTTC    | 32882 | A_95_P117797 | DV160754     |
| 33804 | 398 | 59 | 875  | ATTTGGTAATAAAAATCCACCTAGATGTTTACGGTCTGTATAAGAAGTGTAGTGATC   | 32889 | A_95_P207052 | EB425446     |
| 33806 | 398 | 61 | 973  | TCAGGTTTGCCTAAAAGGGTATGACTGTAACCTTAGAGTGTAAACAGAAAGTATC     | 32893 | A_95_P027431 | TA16517_4097 |
| 33807 | 398 | 62 | 861  | AAGAGACCGAATTCAAGAACAGATGAGGACCAAGAGTATAAAAGGGCTTCTATATG    | 32895 | A_95_P013466 | DV157572     |
| 33808 | 398 | 63 | 714  | GGATGGATGATTAGAACATTTCTCAATTATGGGTTGCCAATTCGTTTTTGAATCTG    | 32897 | A_95_P117112 | DV159902     |
| 33812 | 398 | 67 | 719  | TAGCATTGAGCAATGCCTGTGGAGGAATGCTGATGCTTTGAATTTGTTTATATAGAT   | 32905 | A_95_P231199 | EH624190     |

|       |     |    |      |                                                              |       |                           |
|-------|-----|----|------|--------------------------------------------------------------|-------|---------------------------|
| 33813 | 398 | 68 | 454  | CCAACATAGTATAGGTAACTATGTATATAGTTTTCTAGCCTTCCACGCAGCTTTTTTC   | 32907 | A_95_P265901 BP532057     |
| 33816 | 398 | 71 | 599  | TGATGGGTTCTGATCCATCATTTCTTGAATGAGGAATGTGGAAAATGATCTAGTTA(    | 32913 | A_95_P044291 BP130840     |
| 33819 | 398 | 74 | 218  | CATTTGGATGTTGTACATATCCCACTTTATTGTCTCACAGAATTGTAGCTTGATCTGA   | 32919 | A_95_P031811 CV020968     |
| 33820 | 398 | 75 | 0    | CCGATGGATTTGTATCTGATCTGCTCCTGCTCACGTGACGTTCTTTAACTGATTGTAT   | 32921 | A_95_P242542 A_95_P242542 |
| 33822 | 398 | 77 | 937  | CTTCAAGGATACAAAAGAATGTAAGTACTGAGATAATAATAGAGACCAATGAACGGAGC  | 32925 | A_95_P026196 TA18849_4097 |
| 33824 | 398 | 79 | 398  | TCTGCAGCTTCAAGTTGCTATGCAATGATCAAAGAGCAAAGTTCAAGATTCTATATTA   | 32928 | A_95_P104612 CV017094     |
| 33825 | 398 | 80 | 1197 | ACGCATTCACAGGTGAAAATGAACACGCGGCTATTGCCAAATAAATTGCTTAATT(     | 32930 | A_95_P030001 TA14249_4097 |
| 33826 | 398 | 81 | 429  | GGAATTTTGAACACTTCCTTTCAGCCTACAAGCACTTATTTCTGAGCTTTACTTTTCTG( | 32932 | A_95_P113447 TA13685_4097 |
| 33831 | 399 | 1  | 362  | TAGGTTCCAGTTTTATTGCTGAGAGTAAAGATGTTACTCTGATTTTCTGATTGTCTG(   | 32941 | A_95_P219672 TA21444_4097 |
| 33838 | 399 | 8  | 572  | AGAGTTGAATGGTGAAGTGGAGCGCTTAAATCCGAGATCAAGTTGCAGGAAAATG      | 32955 | A_95_P122212 DW002241     |
| 33839 | 399 | 9  | 277  | CCCGGTTACATTAATATGAACCTTTTCTGCTCAAATGAATTTTGAATTTAGATGCC/    | 32957 | A_95_P022556 AM812473     |
| 33841 | 399 | 11 | 2103 | GTCTGTTGTAGCTTTCAGTAAATTTATCCTCTTCTATTTGACTGCATGGTAAGGAGA/   | 32961 | A_95_P032446 AB084669     |
| 33842 | 399 | 12 | 536  | TGAAGGAACAATAGCAATATGATTACCATTAGAAGAAACAGGGATTTGCATTGATTC    | 32963 | A_95_P088143 FG637946     |
| 33845 | 399 | 15 | 958  | ACATTCTGACAGATTTGGGAAAATAACTGTATCATTATCATTCTGACTTATTTGGGGTT( | 32969 | A_95_P205717 TA18349_4097 |
| 33849 | 399 | 19 | 457  | CATGTAGAAAGATACTTAGCTCTGTGATCTTGAATCAGATCCGTGACATGATGTATG(   | 32977 | A_95_P197442 TA16562_4097 |
| 33850 | 399 | 20 | 152  | GAAAACAGAGTCCGCGGCTTGGCTATGCCTGAGTTTTGTACTAGTATATATTGATTTT   | 32979 | A_95_P162057 EH620807     |
| 33851 | 399 | 21 | 437  | GAATTGGATTGCTGGTTCCTTGATTTTGGCAAAGCACCAGCTGCTTCCCAATTTAG(    | 32981 | A_95_P156777 EH614792     |
| 33857 | 399 | 27 | 728  | TGTTGCTGTTGCTTATGATAGGAAAATTCTCCCTCCACTGGAGGCATATGTCGTTTACT  | 32992 | A_95_P144817 EB448343     |
| 33864 | 399 | 34 | 826  | ACTTTGCAGTCTATGAATCACTAAAAGACTGGTTGGTCAAACAAAACCCTTGGTCT(    | 33006 | A_95_P128722 EB428457     |
| 33865 | 399 | 35 | 386  | GGTCTTAAATTATTTATCGTTGTGCGGGAAAATAAACTAGTACTAATCGTTCAGAGCA   | 33008 | A_95_P098438 BP534475     |
| 33867 | 399 | 37 | 823  | GCACCGGTCAATTGGTTCGTTTTCACGTCATAATTGATTTTGGGTATAAATAAAAAAT   | 33012 | A_95_P028821 TA19898_4097 |
| 33871 | 399 | 41 | 764  | ATATTTACTGTATGTATCTGTGCTGTTAGAATGTGTTGATCGTTCTTCGCGGGATGAC   | 33020 | A_95_P237194 EB447792     |
| 33876 | 399 | 46 | 728  | TGTTTCGTTTGTAAAGTTGACACCTAGGCCCTTTCATCAAGTTTCTACTTTGTGAGCTAT | 33029 | A_95_P012366 EB683912     |
| 33877 | 399 | 47 | 875  | GATTCATTTAAAGAATAAGATCATCCCGATCTTTGAGTGATGTATCGAGTATGCTTTT(  | 33031 | A_95_P022941 DV159900     |
| 33879 | 399 | 49 | 842  | AGCATGTATTGTTGGAGTACACTTTCTTGAGTTCACATGATAAATTGTGATGTCAATTT( | 33035 | A_95_P025271 EB678939     |
| 33881 | 399 | 51 | 784  | CCTTCGCCATATGAATACTAAGTAATAATAGCATGGCACTTCGAATTCGATATGAGA/   | 33039 | A_95_P241764 clpP         |
| 33886 | 399 | 56 | 166  | GGTCTTTTTTAGAGAATCGATGAAACTTGGTAATACCACCCTTGTCTAAGGAGATTT    | 33049 | A_95_P259796 EG649566     |
| 33888 | 399 | 58 | 459  | TATCACTCGAAGTGAAGCTTGATTGTCTATGCAGGAGCTGTGATCTTGAATGAAA      | 33053 | A_95_P124782 DW004581     |
| 33893 | 399 | 63 | 293  | TAATTAGGGTTGGGGTGCTATTTTGTGGTAGACAATCTCCTGGAGGACACAATGTGC    | 33063 | A_95_P166822 EH664045     |
| 33894 | 399 | 64 | 842  | TCATTCTGGTCAGGTTGGTAGTTTCAAGATGGTATCTGCTCTGAGCTCATTATCGTCT(  | 33065 | A_95_P294653 FG167397     |
| 33895 | 399 | 65 | 1510 | CTATATTGAGTTTAGCAGAGCTATTTTCTCTGGAAGGAAAGCTTTTTGCTGGTGAAA    | 33067 | A_95_P189107 X79136       |
| 33898 | 399 | 68 | 611  | CTGAAAATCTCTTGGTGTGATTGGATTAGGTGGTCTAGGTCACCTAGCAGTGAAGT     | 33073 | A_95_P131577 FG642025     |
| 33900 | 399 | 70 | 587  | CTTTCTTAGGAATGAATGATTTCTGGGAGTTTCTGGTATGGTGGAAAATTTTCATCT    | 33077 | A_95_P194582 TA15926_4097 |
| 33902 | 399 | 72 | 138  | CAATGAATGCAGAGCAAAGAGCCATGTTGGATAAGAGAAGGGAAAATGGGGGGAA      | 33081 | A_95_P064900 BP136185     |

|       |     |    |      |                                                             |       |                           |
|-------|-----|----|------|-------------------------------------------------------------|-------|---------------------------|
| 33905 | 399 | 75 | 647  | CTCACCCATCCAAACCAATACTTTTAGGGGTCATTTGTTTTGCAGTATAAGAAAATA`  | 33087 | A_95_P215652 TA20535_4097 |
| 33907 | 399 | 77 | 824  | CGGAGGTGTAAATTTATGTTGTAATACAGAGAAGCATAACAGATGTTGGAGTTGGGC   | 33091 | A_95_P219187 EB424825     |
| 33909 | 399 | 79 | 879  | TGTCTCTGTTAAATTTGTAGATGGTGGTCAAGCTGGAATGTATCCTGCAAGTGTAAG   | 33095 | A_95_P227484 FG148811     |
| 33910 | 399 | 80 | 516  | TGGATTGAGATGCAACTACACGCTCAGCTAATGATTGTGAAGAAGGCACAGTTTTAT   | 33097 | A_95_P088193 BP529983     |
| 33911 | 399 | 81 | 1802 | TCAGCCTCTCCATCAAATCAACAATTGTAATGAGTTGGAATAGCAATGATGATTAAT   | 33099 | A_95_P013046 TA12291_4097 |
| 33912 | 399 | 82 | 736  | GTCCATAGTGTAGTGGCTGATGATATTAGATGGAACCTACAAGTTGTAAATATATGA   | 33101 | A_95_P144427 EB447794     |
| 33916 | 400 | 1  | 259  | CTGGATTCTAGAGGCTCAGATTCGTGACACCGGGTCCTAGTGAGATTATATTGTGTA   | 32942 | A_95_P095023 BP532982     |
| 33917 | 400 | 2  | 818  | GCCACATCTCCAGCCTTAGCTAGTGTGTATAGTAATAGGTTTTTCTTCTCGTTCTTTT  | 32944 | A_95_P117822 DV160789     |
| 33919 | 400 | 4  | 553  | CATGTATACAGTCAATGAACATCAAATCAAGTGCTCCTGGACTGATAAAAACATG     | 32948 | A_95_P067645 BP136931     |
| 33924 | 400 | 9  | 751  | AGATAGATGATATGGGTCTTCTTCTCGTGTGAAGGGTCCTTCATTGTTAAGAGCAA    | 32958 | A_95_P272511 EB450536     |
| 33926 | 400 | 11 | 253  | ATTGCACGGACTCACATGATGCCTCCTGGTTTTCTATGTTGATGCAAAAACAGGAA    | 32962 | A_95_P034474 EG036055     |
| 33933 | 400 | 18 | 831  | TTGGGTTAGCATTAAAGGTGTATCTTGTGATGATTTTAGGTTGAGGTCTACTCCTCG   | 32976 | A_95_P118817 DV161889     |
| 33937 | 400 | 22 | 576  | AAGATGCTCCCTATACGGATTCATTTGATTGACAATTGCTAACGCTCATATTAATAG   | 32984 | A_95_P029716 DW002421     |
| 33944 | 400 | 29 | 747  | AGCATCGGATATTTGGGTGGAAATGCTGATAGATGGTTGCTGGTTTCTTGAGATGT    | 32997 | A_95_P292033 FG163963     |
| 33945 | 400 | 30 | 551  | CCAAGGCAAAGGATTTATATGTTCTATTGACTTTGCAAATCTATTTTCGCGACAATTC  | 32999 | A_95_P261376 FG644419     |
| 33947 | 400 | 32 | 1450 | CTCTTATTGATTTCTGTTGGTGATTCAAAATCTCAAGTATAGGTGTAGTTCAGCCAA   | 33003 | A_95_P233929 AJ438613     |
| 33952 | 400 | 37 | 944  | GCCTCACATTGTTAAGTTGAGTTTTGTTGTGACGATCTCAAATTTTGCTTCTTGTT    | 33013 | A_95_P012756 TA11902_4097 |
| 33953 | 400 | 38 | 477  | TTATCCCAAGCCAGACGTGCAGTGGAAATATAAATGTGATTTGTGCAATACATTGA`   | 33015 | A_95_P125192 DW004988     |
| 33956 | 400 | 41 | 773  | ATGTTCAGTTTTGCCCTTCCAGTGCACAGAGTTGCATGTGGAGATGATCTGCTTATA   | 33021 | A_95_P262681 FG144321     |
| 33957 | 400 | 42 | 1980 | TGTAGCCGAGACCAACTAGCTATTTGTGTTATAGTGGCAATATCAGCAAGTCTTAAA   | 33023 | A_95_P192562 AJ289864     |
| 33959 | 400 | 44 | 426  | GGATGCAGTTCTTACATCTTGTTATCTTATTAATCGTATGCCATCTTCAGCTATCCAAA | 33026 | A_95_P084300 BP528983     |
| 33964 | 400 | 49 | 199  | GTTTATGCTTCCATAGATGCTATCTCTCTATCTATAAATACTGCTGCTCTTTTGAAGCC | 33036 | A_95_P140242 EB444197     |
| 33965 | 400 | 50 | 1065 | GACCTTATCATTCACTTACACTCGCTGTTTGCAGAAATATGGTTTTTGTGGAATAAC   | 33038 | A_95_P305248 EU700060     |
| 33977 | 400 | 62 | 907  | GTGCTGTCAAGATGTATTAATATCTGTGTTAAGAATGACCACCAGTACTTTCGCAATA  | 33062 | A_95_P012226 TA15480_4097 |
| 33978 | 400 | 63 | 409  | ATACGTATCATTGGACGATGATCTGCCTCTTGCTCAATTCGCTGTTGCATTTAAGTGG  | 33064 | A_95_P001881 AJ719181     |
| 33979 | 400 | 64 | 802  | GTCAAATGAAGAATATGCCACATCTCCAGCCTTAGCTAGTGTGTATAGTAATAGTTTT  | 33066 | A_95_P151582 DV160789     |
| 33980 | 400 | 65 | 1110 | GAGCCGTTTAGCCCTAAGAAATTTTTCACTTTTTTCAGAATCAGTGATTAGCCAAGAA  | 33068 | A_95_P197967 TA16677_4097 |
| 33981 | 400 | 66 | 596  | CTCATTTGTTGGGACGTACAAAAAGTTAAGGAAACATGTAAGGCGGGAGCATCCATC   | 33070 | A_95_P146107 FG148780     |
| 33984 | 400 | 69 | 800  | GAGTAGCACCACAGCTATTGCATGTGGATTTTAAATTTCTTAAGAGTTTTTGTGTTGAT | 33076 | A_95_P259136 TA11961_4097 |
| 33990 | 400 | 75 | 690  | TCAAATAAACATGTCTGTTGTGTGATTTCTTCCCCACGGAGAATTGTGATGTGTTT    | 33088 | A_95_P009046 DW002310     |
| 33991 | 400 | 76 | 390  | TGACAAGGTTATGTACATGCACAGAAATGTAAGGTCACTTATGCTTCAACTCTGAAT/  | 33090 | A_95_P131502 EB431801     |
| 33995 | 400 | 80 | 353  | CTCCATTGACCAACCTCAATGGAGTGTGCAATAAAATTTTCTTTTATTGAGAGTG`    | 33098 | A_95_P096193 BP533515     |
| 33996 | 400 | 81 | 705  | TCTTAGTCCAAGAATTTGAACGCCGAATTGCATTCAACAAATTCAGATTGCTAGTTTT  | 33100 | A_95_P296618 EB678339     |
| 33997 | 400 | 82 | 567  | TTATAAACTGTATTTTGTCTGTCAGTCCATGCTAGTTTGCATGTGCTCGGCAGATTA`  | 33102 | A_95_P054171 BP133370     |

|       |     |    |      |                                                              |       |                           |
|-------|-----|----|------|--------------------------------------------------------------|-------|---------------------------|
| 34001 | 401 | 1  | 1704 | GATGAATAAAGATAACAATTTTAGCCACCCTTGGTCTTCTTATTTTGTGGTCTTCCTCA  | 33109 | A_95_P013881 TA14503_4097 |
| 34013 | 401 | 13 | 665  | GCTTACAGATTGCGTTTATTGGCTTCTTATCTACCCGTTCTCACACCCAATGATTACA   | 33133 | A_95_P287003 FG195865     |
| 34017 | 401 | 17 | 727  | GATGATTTTTTCAGGAAGATGAAGGACTACGATAATGAATTCTCTAAAGTCTTGAGAA   | 33141 | A_95_P122882 DW002824     |
| 34019 | 401 | 19 | 751  | AGCAATCAGTTGTTTTGTGACCTTGACCTCATGCTTTGGATCAATGTAATGGGATTTT   | 33145 | A_95_P014351 TA12865_4097 |
| 34020 | 401 | 20 | 784  | AACCAGCAGTAATAGGGGATTATAAAACCGAAACAGATGAATTTGAAGTCCGTGTG/    | 33147 | A_95_P125642 EB424735     |
| 34021 | 401 | 21 | 876  | GAACTCACTTCTGTGTGTATGACATCAAGTTCACCCGCGAGAATCAGTTCAATCTTAAA  | 33149 | A_95_P247437 DW001848     |
| 34022 | 401 | 22 | 759  | GCCAAAATGTTGATATTCATAGGTAAGGGAATAGGTAATCAGTTCAACCTTCTGAA/    | 33151 | A_95_P158862 EH616753     |
| 34027 | 401 | 27 | 542  | GCTGGGGTTATTGAGAGAACATGTAGAGAATAATACTGCACCTATTCTTAGGTTCT     | 33161 | A_95_P021246 EB436513     |
| 34029 | 401 | 29 | 119  | TTCGGATTCTTTGTTCAAGACCATTGTTACCGGAAAGGGCCATTAGAGAACCTTGCT    | 33165 | A_95_P103857 TA11655_4097 |
| 34030 | 401 | 30 | 468  | GAGAAGTGTATCAGGTTTTGTTCCGCTTCAAATGTGAACTACTGTGTAGTTATATC     | 33167 | A_95_P124622 DW004407     |
| 34031 | 401 | 31 | 422  | TCGGGACAAGTTTAGGTGGTTGTACATGATTTTCGCCAATATTAACAATCGGTAATC    | 33169 | A_95_P304488 FG644345     |
| 34034 | 401 | 34 | 423  | CCATTTTTGCCATTTTGAATAAGTGTATTCCATCTTTCAGAGGTCCAACAACCTCAA    | 33175 | A_95_P094898 BP532926     |
| 34039 | 401 | 39 | 658  | GTCCTTAAAAGTCACCCTTGATGTCCATCCAATTTGAAACAATTGTTTTTCCAGAAAC   | 33184 | A_95_P200697 EH623399     |
| 34044 | 401 | 44 | 39   | AAAGGCGATTTAGAAGAAGCACTATATCAAGCAGGTGGTGTGCCTGAGCATGACAA/    | 33194 | A_95_P101268 CB337264     |
| 34050 | 401 | 50 | 463  | TCTGTAGTCTTGAGTAAGAAAGAACCAAGGGTTTTGAATCTGCAATGATTGATGATG    | 33206 | A_95_P000876 TA13391_4097 |
| 34052 | 401 | 52 | 158  | TGATTGAACACTTGTGTTACTCTTTGTTGCGGATCTGCCAGTCTACTATCCAGAAAT/   | 33210 | A_95_P062915 BP135643     |
| 34056 | 401 | 56 | 650  | TCTGATATGCATAGTCATCTAAAACCTAGAAGTACTTGAGGCATACAGTTGCTTTGTA   | 33218 | A_95_P187762 EB683945     |
| 34057 | 401 | 57 | 403  | TTTCTGATTCTCGGAGGAAGAAAAAGGACAAAAATCTAATTTTGGGTTCCAGAAGCTA   | 33220 | A_95_P099123 FG146828     |
| 34058 | 401 | 58 | 400  | ATGTTGTGGGAGTTGGCAATCATGTCTTTGGGTTATAGAAGTGGCATCTGGAAAATC    | 33221 | A_95_P080280 BP527966     |
| 34061 | 401 | 61 | 1220 | TTCATCTTTGGTAATGCTGCAGTTGTGTTCCAAAACCTCGAAAATCGCAGCACGAAAGC  | 33227 | A_95_P034638 TA14654_4097 |
| 34064 | 401 | 64 | 538  | GTGAAGGTGGATCAAGGGAAGAGAGAAATCTCTCAGTATTTTATGTAGAGACATTTCT   | 33232 | A_95_P071400 BP525694     |
| 34067 | 401 | 67 | 755  | CCTGAATTCGGTATTGTGAACCTATGACGTGTTGAACTTTTTTGTGTTTGTATTCCAAGT | 6784  | A_95_P000061 DW000215     |
| 34069 | 401 | 69 | 836  | TGTTGATGATGGTATACGGCCAATGCCTCTGTTTCAGACTGCAAGTTAAGCAGTGTTCT/ | 33240 | A_95_P247557 FG160487     |
| 34070 | 401 | 70 | 918  | GTTGTCATGTACTTCATTGTTCCCTAGCCAAGAAGAACAATTTGTTTGTAGTGTAAT    | 33242 | A_95_P208917 TA19076_4097 |
| 34073 | 401 | 73 | 514  | AGAATGTCTACTTTTACTTTCACTGTCCCATTCTATTGCCTGGGAGAAATACGAAGA    | 33248 | A_95_P278948 AM802231     |
| 34075 | 401 | 75 | 71   | CATAGGAAGGATGCATTTAATTTCTGGTGTTAAATCTTGTGGTCTATTATGTCACATC   | 33252 | A_95_P103962 CV016775     |
| 34076 | 401 | 76 | 2263 | GTCTCCAGGTTCTTCTCCCTTTGAAATTCTAATGTTATGTCATTATAAATATGCCATC/  | 33254 | A_95_P195052 AY971376     |
| 34084 | 401 | 84 | 1153 | GACCTCATGATTTGTAACATTGAGGTTTCTGGTGTATCAAATATTGGAAATATATG     | 33270 | A_95_P030126 TA12717_4097 |
| 34086 | 402 | 1  | 584  | GAATGTACTAATCAATTAATCTGTTCTTTGAGTTGTAACATGGGTAGATGGAGTCCAT   | 33110 | A_95_P241280 FG634671     |
| 34089 | 402 | 4  | 680  | TGTGCTTGGATGAAAGTAAATGTGGGTAAGGAATCACTTACTTCTTCTTTCGTTCA/    | 33116 | A_95_P164672 EH623932     |
| 34091 | 402 | 6  | 797  | GCCGAGTAGATTATCATCTGGTACCAAGGGAGGCCATCTCTTTTCTTATGGATGG/     | 33120 | A_95_P269391 DV999189     |
| 34094 | 402 | 9  | 748  | TGTTATAGTTGATGAGTCAAATTGGTGAATTTTAGGTGGTAGTGGACTTGCTATG/     | 33126 | A_95_P254419 EH624379     |
| 34097 | 402 | 12 | 936  | AGATTTCAACGTTTTGTGAACTGATTATGTAGTATAATGATACACCATTGACTCTCG/   | 33132 | A_95_P001646 TA21639_4097 |
| 34098 | 402 | 13 | 527  | CAACTGTTGTTGTCTATGTGGAGCTGCAAACCTGTTCTATATTTCTGGGTGCCAAGTC   | 33134 | A_95_P086345 FG158351     |

|       |     |    |      |                                                              |       |                           |
|-------|-----|----|------|--------------------------------------------------------------|-------|---------------------------|
| 34101 | 402 | 16 | 745  | GCTGGGTGATTCCATGTGTATCATTGTTGCTTTGCTGAGTTCTCATATCTATTTTCCTT, | 33140 | A_95_P011631 EB683371     |
| 34103 | 402 | 18 | 698  | ATGAGACTTTGGTCTCAACATCATTATATCTTGATCATGGCATCGATCACTTGGTGAT   | 33144 | A_95_P137857 FG640721     |
| 34105 | 402 | 20 | 526  | GGCCTTGCTTCTCAATTTGAAGTATAGTTTATTGAGAAAATGGCAAATGCCAATTGTC   | 33148 | A_95_P023571 DW004204     |
| 34112 | 402 | 27 | 1060 | GTGATTGTCATCTATGGGATCGCGACTATAATCGTTTATAATAAACAAAGACTTGTCC   | 33162 | A_95_P032271 A16119       |
| 34115 | 402 | 30 | 499  | GGTATTGGAAGACAACATTATTTGTGTGGGTTAGCATGATGTTGTTTACCATGGAAT    | 33168 | A_95_P262086 BP134553     |
| 34116 | 402 | 31 | 813  | ATTTCTATGACTCATGAAAACTGGCACCTTTCTATAAAGGCAGTATGTATTTGGAG     | 33170 | A_95_P117742 DV160694     |
| 34118 | 402 | 33 | 994  | CAGTAGGAGGTTGTTTCTCAAATAATGTATGCACAGATTGTATTTTCTCTGTGAGA     | 33174 | A_95_P010936 TA13191_4097 |
| 34119 | 402 | 34 | 902  | ACTTCGGGAAGCACTGAAAATGGCAATCTTTTGCCAACTGATAGCAACATACCATTTT   | 33176 | A_95_P247317 TA13860_4097 |
| 34121 | 402 | 36 | 512  | ATGTAACATGATTTTCTACTGTTAAGAAAATTTTGGAGATGGCGGACCATTTGGCTG    | 33180 | A_95_P185437 TA13912_4097 |
| 34123 | 402 | 38 | 659  | TCTACATGTTAGAGTATCCAACCATGGTGATGCTTTCTACATTTTCCCAGAGCTACCT   | 33183 | A_95_P150987 EB449923     |
| 34126 | 402 | 41 | 855  | ACCGGCTCAGAAAGTCGAGTTATAGTTTCTCACAAGTTTCTCTTCTTTTCTTCTT      | 33189 | A_95_P261696 DW000285     |
| 34127 | 402 | 42 | 957  | GTACTTGTCTTGGTTTTATGATGATGAAGTACTATTGCTCTAGTACATTGCTGGTTTT   | 33191 | A_95_P194637 TA15939_4097 |
| 34134 | 402 | 49 | 477  | GTGAAATCTCCTCCTCGATGCTTACTGCTTTTTAAAATTGTAAGCTTAATATTGTTCTC  | 33205 | A_95_P000971 EH617048     |
| 34136 | 402 | 51 | 680  | TTCATTTTGTTCCTCCCTCCAACTACATCTAGCTTTGGTGATCTGAATCCTTATTT     | 33209 | A_95_P171331 EH665116     |
| 34138 | 402 | 53 | 554  | GATGCTCATGTAAATTTCTCACGTTTGTAGTGTGAGCTGCAAACCCAGAATTTCAA     | 33213 | A_95_P107962 EB678578     |
| 34139 | 402 | 54 | 899  | AACTACTCTATCGTTTGTAGCGCAACTCTTTGGATATCAGTTTATCCAAATAGTATCACT | 33215 | A_95_P181667 TA13037_4097 |
| 34141 | 402 | 56 | 108  | ATAAACATGGTTGACTCTGGATGGATTAGTATAGTTAACCACGGATACATTAATCAT    | 33219 | A_95_P138767 EB442495     |
| 34151 | 402 | 66 | 626  | TTCCTGTCAGCATCTGTGTGTTCTGTTTATCTATGGGTGACCTTCTAATAAAGTTAA    | 33237 | A_95_P237654 EH617567     |
| 34153 | 402 | 68 | 231  | ACAACAGTTCAAGGACTGAGGAAACAATCACTTACAAAAGATCCTCAAAGACCTG      | 33239 | A_95_P158967 TA12804_4097 |
| 34164 | 402 | 79 | 642  | GGCGACTTAGAATAATGCTTCTAGTTGAATTTGAGATAAGTTCACACTATATGGAAG,   | 33261 | A_95_P244572 EH621211     |
| 34165 | 402 | 80 | 784  | TGGCCAACCAATTGAGAAGGTGCAACAGTACACTGAAAGGGATCGTTTTTGTCTGT     | 33263 | A_95_P243447 EB681076     |
| 34174 | 403 | 4  | 729  | TGTGCATGCGAATACATGCATGGCTTTATCATCTTTTCAAGTGTGCAAAGAACATAAA   | 33280 | A_95_P248557 EH623509     |
| 34178 | 403 | 8  | 631  | CTCTCTTAAACCGGTTATGCCCGCTGAATAAAGAAGGTAAACGGAAGTTCTGTGACA    | 33288 | A_95_P121307 FG141428     |
| 34179 | 403 | 9  | 760  | TTTGCCAAAGATTGTTGACAAAGTGGAAGCGATTGAGGCCATCGACACAAAAGGCTC    | 33290 | A_95_P115512 DV157751     |
| 34180 | 403 | 10 | 726  | TCCCATGATATTCTCTAAATAAATAAGAACGTGCATAGGTTATGCCTTTCCGCACCTT   | 33292 | A_95_P115452 DV157667     |
| 34185 | 403 | 15 | 821  | AGTCAGCACATCATAGTGGTACAAGAGTCATGGATATTTTCTATTAGTACTTCATAGT   | 33302 | A_95_P001031 DV999190     |
| 34187 | 403 | 17 | 817  | TTTTAATATGCAGTTGAACCCGCTGTTGGCTTAAGACGTATGGAGAGCCAAGTGAG     | 33306 | A_95_P296588 EB677957     |
| 34188 | 403 | 18 | 931  | TCGAGATTGAGAAAATGGAAGAGAAATTCATGGTGGTTTTTCCCTCACATTTGG       | 33308 | A_95_P193322 TA15645_4097 |
| 34191 | 403 | 21 | 489  | AGTTCTTCTCCTGCCTTTTATGGCCATTAGAGCTTGGACTTTCTCGGCAATAAGATTC   | 33314 | A_95_P252899 BP525788     |
| 34192 | 403 | 22 | 412  | AATTAGTCTGCTACATCCTTCTCTGGTGTGAGATCGAATTGCCGCATCAAATAGAT     | 33316 | A_95_P076280 BP526945     |
| 34196 | 403 | 26 | 796  | ATACCATTCTGAGCAATTGTTGGAAAATGTCTCTGTTATTGTGGATCCGTCTGAAGC    | 33324 | A_95_P232509 DV162021     |
| 34199 | 403 | 29 | 571  | GTTTATCTCCACTTGGACATCACTCTTTCACGGACATGTTATATACTTCTCAAATTATC  | 33330 | A_95_P028911 TA11814_4097 |
| 34200 | 403 | 30 | 748  | GGCAATTTCTCCTCATGTGACTGTAAATAACAAGTATACCCTGTTAATATGTCTATC    | 33332 | A_95_P023856 EB426055     |
| 34203 | 403 | 33 | 636  | GACAAAAGATGTTGATGCTTTTTGTGAAGTGTGGTATGTCTAATGACATCCTGGTT     | 33338 | A_95_P243542 EB432106     |

|       |     |    |      |                                                              |       |                           |
|-------|-----|----|------|--------------------------------------------------------------|-------|---------------------------|
| 34204 | 403 | 34 | 691  | TATCTTTTGGTTCCTGTGCTGTCTAATTTGTGGTATATTATATTTCTGATTCGCGAGCT, | 33340 | A_95_P001716 TA13252_4097 |
| 34205 | 403 | 35 | 92   | TGTACGTAAAAGATTGTATGGCTTTTTCGACCTATGTTTCAGTATACGAGTGGTTATTT  | 33342 | A_95_P142217 EB445747     |
| 34210 | 403 | 40 | 525  | GTATGTGTTCCAGTTTGTGTAAGTATAATTGAAGACTTCCACAAAGTTATATCTTATC   | 33352 | A_95_P178382 TA12233_4097 |
| 34211 | 403 | 41 | 63   | CTCCAGCTTCTTTTTATTGTTAGTAGTAGTGTGAATTCTCGTGTCTCAATTTGGATAG   | 33354 | A_95_P033264 AJ344593     |
| 34213 | 403 | 43 | 365  | CTCTTCAACCATCCAACCTCAAATATGAAAAGCTCTGGAAGCGCGTATACTGTGGCTTCT | 33358 | A_95_P081320 BP528224     |
| 34217 | 403 | 47 | 408  | AACTGAGTGAAGTTGCAGACAATAGGAATGATTCTCTGGTCCAACCTGTGCTGGATC    | 33365 | A_95_P299383 AM793808     |
| 34221 | 403 | 51 | 603  | GGACTGCCTCTCTTTTTGTATCATCTTAATGTGCAACAAGTGGTTTAGTTGTTAAAG/   | 33373 | A_95_P286658 FG637905     |
| 34228 | 403 | 58 | 773  | GGGTCATTGCTTAATAGAGCCTAAAGCCATCTTTCTGGAGCTATCAAACAGAATTTT    | 33387 | A_95_P221952 TA21928_4097 |
| 34229 | 403 | 59 | 759  | CCCATTTTAAATAAAAATTGCGGCTGATTGAGGTGGTTAATGGGGAAGGCAATGCAC    | 33389 | A_95_P149512 EB679387     |
| 34230 | 403 | 60 | 683  | GCTCAGAAGGAGTATGCCAGTGACATTGTTGTAATTTATACTCAGTACCATCAATATT   | 33391 | A_95_P316938 FG201409     |
| 34233 | 403 | 63 | 536  | TTCATGTACTGCTTACGAGGCACAAAATTTGAGAGGAAGAACTAATCAATAAGTTTC    | 33397 | A_95_P129547 EB429518     |
| 34235 | 403 | 65 | 662  | AGAGATCCATGGAATGAACAAGAAAACCAAACAACACGGCGCAACATAATACAACG     | 33401 | A_95_P316118 FG201375     |
| 34236 | 403 | 66 | 757  | GTAATAAGTGATTCAGCTGTAAAGAGGTGTGAGAATGTATTCAAATGAATTATTGCT    | 33403 | A_95_P180097 DV162548     |
| 34237 | 403 | 67 | 714  | GAAGAGAGTTGCAAAGAAAAGCCTTGACGTTTGGGCAACAAGTGACCCTAAATATTG,   | 33405 | A_95_P150897 EB681051     |
| 34243 | 403 | 73 | 165  | CTCTCGCATCGATGAAGAACGTAGCGAAATGCGATACTTTCATATTTTTCTTATCTTTT  | 33417 | A_95_P031906 TC76829      |
| 34246 | 403 | 76 | 542  | TCTCCGTAGTTTGAAGTCTGATATTTTCTGTGCTCTCTCTAAAATTGACTGAACATC    | 33423 | A_95_P017721 EB678067     |
| 34252 | 403 | 82 | 323  | TTCTGTGCTCTGGTAGGTGAGTTCTCCAGTTTCTCTCCCGTTTGTAATTCTAAAT      | 33435 | A_95_P102552 CV016071     |
| 34256 | 404 | 1  | 836  | CCTGACTGGCTAGAGTAACATGAATTTTGTGTCATCTGGCTTTGTGTAACCTTATCT/   | 33275 | A_95_P277918 EB683280     |
| 34264 | 404 | 9  | 1215 | CTGGTATCTGTAAAGAGACAATTTTGTGCTAGACTCTGATTTTCAAATATTTTAGCAC   | 33291 | A_95_P212107 TA19758_4097 |
| 34268 | 404 | 13 | 864  | GTCCCTCTCTGCCATGTTATTACTGTTGGTGATGAAAGCGATTTACAATTTATTTAAC   | 33299 | A_95_P007711 EB424607     |
| 34269 | 404 | 14 | 183  | CCACTTGATAAAGAGCAGAGGGTATCTATTTAGTCATCTTTGTCTGATGGGCACAT     | 33301 | A_95_P166772 EH664032     |
| 34271 | 404 | 16 | 403  | CTGAAATCTCCGGTATTTTGTGAATTATGGATTGTATTGGTCAATAACCTGCAGAGTT   | 33305 | A_95_P029886 FG645607     |
| 34276 | 404 | 21 | 243  | AGCCCTACACTCTGTTTCAGTCACAGAAGTGATTGTTTTGATTGAAAAAAGGTGACTC   | 33315 | A_95_P088848 BP530243     |
| 34281 | 404 | 26 | 258  | CGACTTCGTCAGGAAGAAGACTAGAAAGACTTGCAGAAGAGAAGAAACGTTTGAAAAA   | 33325 | A_95_P132212 EB432657     |
| 34282 | 404 | 27 | 775  | TCAACAAAGAAAGAACCTGCCGAGAAAGCTAAGACCAAGAAACCTGCAGTCGCTAA,    | 33327 | A_95_P234344 EB450381     |
| 34284 | 404 | 29 | 1179 | ATTTTCAGGATGTACTATGCTTGAGACGCTGGACGTACGCTTTTGTCCCAAGATTTGTC  | 33331 | A_95_P018501 TA19010_4097 |
| 34285 | 404 | 30 | 1280 | GGATGTTTATTTGCTGATTTTGCCTTTCTATGTACTGAATTATGATTGGCCTTAGATCC  | 33333 | A_95_P195657 TA16165_4097 |
| 34287 | 404 | 32 | 259  | CTGGAATACCTGACAGCAGAGGTTCTTGAATTGGCTGGTAAATGCAAGCAAGGATCTC   | 33337 | A_95_P021426 DV158629     |
| 34290 | 404 | 35 | 1217 | TTAAAAGTTTTGACAACTTGTGAGTTCATACTGCAATCTGCAACTGCCTAAGCCTTT/   | 33343 | A_95_P015221 TA16816_4097 |
| 34293 | 404 | 38 | 854  | GATACTTGAGATGTATTTTAAATGGGTATTAATCAACTTCTCACCATCGCTGCTGTTI   | 33349 | A_95_P296123 EB450072     |
| 34295 | 404 | 40 | 391  | CCTTCGTAGAATGAGAGCATCTATGATGCTTTTCTACCCTTCTTATTTAGTTTGTGAA   | 33353 | A_95_P098403 FS433680     |
| 34296 | 404 | 41 | 302  | CATTGGTGACTATTTTCAGTATGTGCCTTCAACAACCTTGTATCAATGCATTTTGTGCT  | 33355 | A_95_P091608 BP531435     |
| 34309 | 404 | 54 | 788  | ATATTGCACAATGCTGTTGGAGTCTTGGCAGTGTGGGAATTGCTCTACTTGTGGTG     | 33380 | A_95_P201137 EB450512     |
| 34310 | 404 | 55 | 433  | ACCACCTTTGCTTGTCTTACTCTTGTGAGTGGCTTCTATCTTGAATATAACAATTT/    | 33382 | A_95_P219587 TA21427_4097 |



|       |     |    |      |                                                              |       |                           |
|-------|-----|----|------|--------------------------------------------------------------|-------|---------------------------|
| 34311 | 404 | 56 | 748  | CCTAATCCATCGGACTGAGGATGTTATGGTTATCACAGATTTATAAGATACTACATTA   | 33384 | A_95_P115927 EB439621     |
| 34313 | 404 | 58 | 815  | TGAGGGGGTCCAAAGTATTGTAAATTACTTGGTCACTCCATAGTACAATGCATGGC     | 33388 | A_95_P119647 DV999105     |
| 34314 | 404 | 59 | 171  | CCTTCTTTTGTTCATATAACAAGCCACAAGGCATCAAGTTGCTGTATTGAATTATTGACT | 33390 | A_95_P097338 BP533992     |
| 34315 | 404 | 60 | 1085 | GCAGGAAGGCATTGTAGAACCTCTATATTTGTTCTGGTACAAAACAGTCTAACATGT/   | 33392 | A_95_P137482 Z93770       |
| 34319 | 404 | 64 | 584  | AGAGGGCACGTGGAAGAAGAAAGAGCAGGGGTTACAAAGTTTAAGTTGATTTTCAT     | 33400 | A_95_P101003 TA12021_4097 |
| 34322 | 404 | 67 | 439  | GGGGTAGAAATTTATGCTTGCATATTGTAAGTTATGTAGCTTCAGATTCATATGGA/    | 33406 | A_95_P024581 BP525841     |
| 34323 | 404 | 68 | 867  | CCCAGTTATCCTTCCTCGAAATTGAGACACGTGGATTGGGATAAATTAGAGGCTGAA    | 33408 | A_95_P185232 TA13868_4097 |
| 34325 | 404 | 70 | 725  | GCACCTTCTGTATCTAGCCTTGTCATAGTTGTAGTATCCCTTTGTTTCAGTTTTTAAA(  | 33412 | A_95_P235119 EH615107     |
| 34327 | 404 | 72 | 786  | CGTGCTGTTACGTTAGAACTTGTCACTCTTCCACATCAAAGTTAATATATTGACTTA    | 33416 | A_95_P012176 EB438154     |
| 34328 | 404 | 73 | 768  | GTGTCGTAGTTAGAAAAGTTTTAACGTTCCATGGGAGAAAATTACGCATTTTTTGCTT(  | 33418 | A_95_P250587 EB677940     |
| 34342 | 405 | 2  | 781  | AATTATGGATTTTGAAAATGCACGTCTGCAGAGGCAATTTGTTCTCGTTCGAGCCCTAC  | 33445 | A_95_P250417 FG140098     |
| 34347 | 405 | 7  | 854  | TCTAGACTCGTGACACCAGATTGTTGGGACTTGTAGTTTATCATTATTTAGACTTCCG(  | 33455 | A_95_P219547 EB681712     |
| 34351 | 405 | 11 | 300  | TACTCTTGTTCCATTATGAGAAATTATTTTCTTGCACCTTAGCTAACCCCAATTAAGT(  | 33461 | A_95_P025831 EB446783     |
| 34359 | 405 | 19 | 688  | AACTACGATGTACTTTGCTCCGCTTCCCAGCAATGCCTCGATTAGTTTGCTAACTTGA(  | 33477 | A_95_P303828 FG200649     |
| 34367 | 405 | 27 | 764  | GGTCTTGGTATGCACAGTTAGTAGATAGTATGTGAAGGTATTTTACATTCTTTTGTA    | 33492 | A_95_P117587 DV160534     |
| 34368 | 405 | 28 | 1206 | GTTGTAGGAGGGTAGACATAGAAATGTAACGTATTTTAGGGAGGTTATTGTAATTCT    | 33494 | A_95_P014446 AB107692     |
| 34374 | 405 | 34 | 914  | TTGTCCTTTTATTTTGTAGGAAGTTGCCTCAAAGCGAGGGATCACACAGTACCACCC    | 33505 | A_95_P010151 AB193040     |
| 34375 | 405 | 35 | 323  | TCAGGAGTTCAGATGGTGGGATCAAATTGATCAGTTTCTCCTTGGAGCAGTTCC/      | 33507 | A_95_P147177 FG159920     |
| 34380 | 405 | 40 | 361  | TTGCTGAGGCAGACAGTGAAGTTATAGTGTATTTTCAAGTATTCAGCTCTTTGTTCA.   | 33517 | A_95_P068100 BP137050     |
| 34381 | 405 | 41 | 350  | GTGGTTAGTCCGAGTACATACATGTTATTATGCTCCCATGGATATAAATATTGTACC    | 33519 | A_95_P026851 TC69357      |
| 34383 | 405 | 43 | 803  | TGTTCCATACTTAGCAGAGAATGCATCAACCGACGGGAGCTCTTCAATTGTGGAAC     | 33523 | A_95_P234399 EB425505     |
| 34386 | 405 | 46 | 627  | TCTTGTAACCTTCTACAAGAGGACTACAGGGCTTGATCCTGTGATAGAAGTGAAGAA    | 33529 | A_95_P127282 FG157369     |
| 34389 | 405 | 49 | 777  | TTTCCACTAACCACTCCTCATTTGTACAATGCCATAACAGATAATTGCATGTGCTGGC/  | 33535 | A_95_P143842 EB447026     |
| 34394 | 405 | 54 | 229  | AGAGGCAAGTGTGTAATTCTCAGATCAAGTTATCCCTTTTTCTCGCTGTTTACATT     | 33545 | A_95_P093303 BP532213     |
| 34395 | 405 | 55 | 565  | AGCCCGTTATCTGCAGCCTTTCGAATACCTTACGTTCTGTTCTTTGTTTAGACCTACT(  | 33547 | A_95_P268756 DW002932     |
| 34399 | 405 | 59 | 510  | AGATGCAGGGATTTGTATACGAATTTTCGAGAGATGTATGATGCTTGTGTATATGAGA   | 33555 | A_95_P160617 FS435443     |
| 34403 | 405 | 63 | 790  | CTCCAAGGTTGTGTTCTAGTTCCAATATTCTCTAATTAGTTTGTGTTGTATGCTAACCA  | 33563 | A_95_P028756 TA19504_4097 |
| 34405 | 405 | 65 | 605  | GCTCGAGGTTGCTGTTATTTACACAAATTCTCAGTACATTATTACATCTCAACTAAGAC  | 33567 | A_95_P027461 TA18771_4097 |
| 34406 | 405 | 66 | 769  | ATAGTAGTAGGGCATCACGCCATTAAGAGTGTGGGCATCATGGCGACTCAAGT/       | 33569 | A_95_P316188 EB425136     |
| 34407 | 405 | 67 | 152  | GATATCCCGGTTCTTTTGTAGATGAATTGATGAACTTGGTAATAGCACCTTTATAAG    | 33571 | A_95_P154352 EG649542     |
| 34408 | 405 | 68 | 765  | GGAATGAGTACTGTTGTGGATTGTTCTTTTATTTATTTGAAGCACTACAGAAGTGGAC   | 33573 | A_95_P148492 EB677831     |
| 34409 | 405 | 69 | 1094 | TATTGTTAATCCACTCAGGTCAGTTACCGGCCTCTAGCGTTCCTTATATTTATAAATG   | 33575 | A_95_P192457 TA15455_4097 |
| 34410 | 405 | 70 | 656  | ATTCCATTGGCAAAGGAAGGTGTTTTTCTGTTGCTTTAGGCTATATAATCAGTCCGG    | 33577 | A_95_P302013 FG640485     |
| 34413 | 405 | 73 | 1029 | GATGCTCCAGTGAACCTCTTATTTCTGTTGGAATGAATTCTGTTTTTACAGAGCAA.    | 33583 | A_95_P251777 AB119466     |

|       |     |    |      |                                                             |       |                           |
|-------|-----|----|------|-------------------------------------------------------------|-------|---------------------------|
| 34420 | 405 | 80 | 1773 | AGCTGATCACTCTGTGATTCAAGTTATTGAGGAGTCTATGCGATATACTAATATTGCT  | 33597 | A_95_P290233 AB454418     |
| 34421 | 405 | 81 | 998  | CAATTTTGGGTTAGTGTTAGCTTCTCCACCTGTGTATATATAGCTCACCATCACCTGTC | 33599 | A_95_P209977 TA19303_4097 |
| 34425 | 405 | 85 | 621  | ATCCTCCCCGTCTTTTTGTCTGTTGCTGGAGTTTGAATTAATACTAACAATGATTTT   | 33607 | A_95_P210997 TA19516_4097 |
| 34432 | 406 | 7  | 471  | AGTTGAAGATTTTTGACTCTTTCTTCTTGTTCGGTTACTCACTGAATTTTGGCTTCTC  | 33456 | A_95_P021626 TA13926_4097 |
| 34434 | 406 | 9  | 784  | CGCAATATTGCAGTGTATCAATTAACGATAGCAGCTTTTAGAGGATTGTATGATTTGA  | 33458 | A_95_P200477 DW000158     |
| 34435 | 406 | 10 | 604  | ATTCATATCGGCTGTGTAATATTGCAAGTTCTAATGGGTATGTACTTTGTCAACCATT  | 33460 | A_95_P182452 AF153278     |
| 34436 | 406 | 11 | 840  | AGTTGTTCTGATTAAGCCTTTGTCCCGTCGTTGTAAAAGGTTTATACCTGATCAGCCC  | 33462 | A_95_P021386 DV160093     |
| 34451 | 406 | 26 | 1154 | TGATGCTGTTGAAGTTGTACCGACATAATTTTGAGAAGTGAGCCTTTTCTTTTTTCT   | 33491 | A_95_P195792 TA16195_4097 |
| 34453 | 406 | 28 | 836  | TTGAAGGTACTATCACTTATCTGTCTCTCATAGGCTCTGTGTATTGTCACTATCGCT   | 33495 | A_95_P273271 FG135498     |
| 34456 | 406 | 31 | 1374 | CCAGCTCCGTATATGCCACACCATAAAAATGAATCTTTTCTCGAATTTTGATTTTGT   | 33500 | A_95_P199967 TA17109_4097 |
| 34457 | 406 | 32 | 750  | TTGCTGAGTGACAGAAACCAGAAAATGTCAATCCAATGTCTCCAGGAGGCATCAT     | 33502 | A_95_P129917 EB429852     |
| 34463 | 406 | 38 | 841  | GCGAGATTTTCTTTGCAGTGTCTTTTGTCTACCTGTTTATACGTTTAGCATCGTTTG   | 33514 | A_95_P021901 EB446106     |
| 34464 | 406 | 39 | 1578 | CCAGGAAATGAAGATTTCCCGAATTGGGGACAGTTTCCGCATCCAAACAATTTCTGTT  | 33516 | A_95_P237479 U66401       |
| 34469 | 406 | 44 | 420  | GTTTATCGCTCCGAGTAATACTGAAGATTCAAATCTAATTAGATGTGGCTAGTTTTG   | 33526 | A_95_P180657 TA12797_4097 |
| 34470 | 406 | 45 | 125  | GATTATTGACTATAATCAATGTCCTCGCCGATAAAAATTTCCCGAATACTCTTGCGA   | 33528 | A_95_P167266 EH664155     |
| 34471 | 406 | 46 | 1631 | GGGGGATATTTGATGTGTATTTATGCATGTCCTTTTATGGCAGTGTGGCTTAATTT    | 33530 | A_95_P194142 TA15830_4097 |
| 34478 | 406 | 53 | 476  | AGAACAATAATGGCAGGATTGAAGATATAGAGAAGACAACATGGGGTGCCTTCGTT    | 33544 | A_95_P282868 AM831732     |
| 34479 | 406 | 54 | 697  | CATTGGATGAAAGTGGAGAGGATCTCTGGAAGCTACAATATCTTCTACTGCATCTG    | 33546 | A_95_P219987 TA21512_4097 |
| 34480 | 406 | 55 | 392  | ATGAACGTCCTGCTAACTGGAGTTTGTACGTCCAAATTTCTAGTTTCTCAATACCTT   | 33548 | A_95_P309248 FG645376     |
| 34482 | 406 | 57 | 593  | AGTTTGGTGTGGAGTTCTGTCAATTCCTGTTGCAAAAACATTTAATATGTGATCA     | 33552 | A_95_P109387 TA12024_4097 |
| 34487 | 406 | 62 | 759  | GAGTTTGGTATTTTGTGTTGCTTGGACAGTTGGAATCCTAGTTATACATCTCAATGCTT | 33562 | A_95_P182427 TA13214_4097 |
| 34489 | 406 | 64 | 818  | AAGAGAGCATTTGGGAAAAGATTACACTCAGTTCCATACATTTTGGCAACTCGGAT    | 33566 | A_95_P147272 EB451579     |
| 34490 | 406 | 65 | 575  | GGAGAACTGGTGATTGTAATATGGTACTCTTTCTTATTCAAGTTTAGGTTCTCTCCT   | 33568 | A_95_P004091 EB451750     |
| 34493 | 406 | 68 | 677  | GGGGATCTTTAGGGCCAAAGTGGCTGAATTAGAGGTAGATGAAGATTGTGTTTTTA    | 33574 | A_95_P118922 DV161997     |
| 34494 | 406 | 69 | 786  | AGCACCTTAAAGTTTTGATACGTTATTCGCATTGTACCTGAGCTATTCCTATTTCCGTT | 33576 | A_95_P145772 TA11948_4097 |
| 34503 | 406 | 78 | 341  | CAAAATGTTCTGGAATGGATGCTGAACTGTTCCGAAGATTGCCAGAAACAGTATGC    | 33594 | A_95_P111967 CV020454     |
| 34504 | 406 | 79 | 720  | TGATGTCATAACTGTGATAAAATTCACCTATCTTTCGTGCTCACCACAGTGATGACT   | 33596 | A_95_P223652 TA22299_4097 |
| 34506 | 406 | 81 | 741  | ATTCCTTACAGTAGAAGTGGTGGAGGTGGTGTGAGTTACTATGAAGGAGGTAAC      | 33600 | A_95_P148537 EB677889     |
| 34508 | 406 | 83 | 725  | TGGAGATTAGTCCCGTGTGACTGGAGAGTGCCACCGATACTCAAAGGTAAGTTTTAT   | 33604 | A_95_P136497 EB440258     |
| 34513 | 407 | 3  | 777  | CTGAAGTTGCTGATTGCTGAAACACTAATTATGCTGAGATTAGTTATGATGTGACTTT  | 33612 | A_95_P204577 EB438260     |
| 34515 | 407 | 5  | 512  | AATTTGCTAAGATTCTGTCCAGAATTTCTCTCGATCCCTGTCTACGAAACGGGAAA    | 33615 | A_95_P282638 AM835801     |
| 34516 | 407 | 6  | 648  | TTCTGCAAGATTGGGCCTCTATTCCTTTTACTATTCACTGCGAAAGAATTGTGGTGAAA | 33617 | A_95_P052111 BP132834     |
| 34518 | 407 | 8  | 727  | CAGTTTGAAGTATTTGACGTGGAAGTCTAGGCATTCAAGACTGCAAACGGAGGAC     | 33621 | A_95_P293683 FG645494     |
| 34520 | 407 | 10 | 356  | TTAGCTAGAGTTGTTGCTGTATGAAGTACTGGAGGACTGATGTTCCCTTTCAACC     | 33625 | A_95_P004961 EH665674     |

|       |     |    |      |                                                               |       |                           |
|-------|-----|----|------|---------------------------------------------------------------|-------|---------------------------|
| 34526 | 407 | 16 | 305  | AATTGATGAGTTATGTGAAGAATGGGCCCCAGAACCACTTATCCCTTCCATCACTGAT    | 33637 | A_95_P087248 DV162026     |
| 34528 | 407 | 18 | 730  | GGGCCTTATCTTGTGCGGATATTGGCTTAATAGTGGAGCCCATTAAGTGTGTATCTG     | 33641 | A_95_P015236 EB680043     |
| 34532 | 407 | 22 | 839  | TGGGAGGATGGCAGTTATAAGCATGAGAATTCTACATTCGAGCTCACCATTAATCAT     | 33649 | A_95_P126122 EB425359     |
| 34535 | 407 | 25 | 657  | TCCCGTCGAAAAATTGAGGCGAATTATGAAAGAGAGTGGCCATGATGTGGAATCTG      | 33655 | A_95_P024086 EB449027     |
| 34540 | 407 | 30 | 779  | AGTACTCAACTCAGAAGGAGAATCAGTTGATACCAATTAGAAGACCTGGTTCAAACA     | 33665 | A_95_P125812 EB424907     |
| 34543 | 407 | 33 | 783  | ATGTGCCAACTGTTATTGGAGATGACATTGAGATGCCAAGACAGTGGGTATGTGCA/     | 33671 | A_95_P284088 EB679092     |
| 34546 | 407 | 36 | 660  | GAAGTTATTGTTCTTGTGTTTGGCATTCACTTCAGTTCCTCGTCGCTGAACTTTTCTTGTC | 33677 | A_95_P285638 FG634274     |
| 34547 | 407 | 37 | 1864 | TAGTGACTAGCCTGAACGCCATACCAAATGTTAGGGCAAGCTCTCTTTGGTCTTACAT    | 33679 | A_95_P113127 AF223573     |
| 34552 | 407 | 42 | 891  | CCTCTTAGTTCAAAGACAATCTGCAGTATTGTAATTGTACTTGTCTGTTGGTTGTG      | 33689 | A_95_P016741 TA15939_4097 |
| 34554 | 407 | 44 | 823  | TGCAGAGCTAGATTCGGGTGGATTTTATTGTATTTTATTCCTTGTTAAGGAGCCAGT     | 33693 | A_95_P291573 EB426455     |
| 34559 | 407 | 49 | 594  | ACCCCTTTATCTAATGCTGAATCGACGACCTATTCTAAGTAAGAAGAGCTTTTTGGA     | 33703 | A_95_P191082 EB429462     |
| 34561 | 407 | 51 | 840  | TATGCATTGGTGCCTGACAGTTTTGGCAGACTTAATGGGAGCAATTGGATCAGGAA      | 33707 | A_95_P288338 DW002516     |
| 34562 | 407 | 52 | 158  | ATTCTAGGAGAAACCTCCTTTTATTATCACCACGTCTGTGTGGTAATATTGATTAAAG    | 33709 | A_95_P288518 BP533050     |
| 34564 | 407 | 54 | 410  | CTTACCCCTACCTTATGACGGTAGAGTAGGTTGTTTCTGGAATGATCCTCTTCTGTAG/   | 33713 | A_95_P056831 BP134057     |
| 34568 | 407 | 58 | 760  | GAGGCTGGATTTATCGAACAGGTTTCAAGATGCAATTAAGGAAGTAAGCAATAAGC      | 33721 | A_95_P128647 EB428386     |
| 34575 | 407 | 65 | 94   | CATGGGGATCACCTATCACACTTTTGGAGCTTAACTTACTGCATTACTAGATGTTA      | 33735 | A_95_P134757 EB437526     |
| 34576 | 407 | 66 | 517  | CCCTTACCAGATTTTTGTTTCAATAATGTTGTACAGCACATAGCAGACCATTATCTA     | 33737 | A_95_P078160 BP527443     |
| 34581 | 407 | 71 | 798  | GTTGATAAACTATAATGGGATTCAATGACCAAGTGGAGTGCCTCATGAACTTGCAT      | 33747 | A_95_P272811 EB679048     |
| 34582 | 407 | 72 | 789  | CTTGGATCTCATGAATGCATAGTAGAATACTGTTGTCTTTGCTTATGTTATCGCTATG    | 33749 | A_95_P231674 DV159157     |
| 34583 | 407 | 73 | 1557 | TTTTATCAGTTTGCTAAAAGAAGCCCTCTTCATTAACCTCTGCTTTCTTTTGGTGGTT    | 33751 | A_95_P180777 TA12824_4097 |
| 34584 | 407 | 74 | 505  | AATTGTAAATGTTGATTGTAGTCCAGATATGTTATTCCACCGTGGGGTTTTCCCTG      | 33753 | A_95_P024546 BP530731     |
| 34586 | 407 | 76 | 474  | ATTTGCCTAGTGTGTATCTCCCTGTCGCCAAATGAGAAAAGGAAGTGTCTTTTGGAT     | 33757 | A_95_P041556 BP130120     |
| 34599 | 408 | 4  | 521  | TTAGCATAGTTGAAGAACCTAGATTTTGCCTTTAAAATCTTGCTTGAGGCAGACATTG    | 33614 | A_95_P123972 FG645200     |
| 34600 | 408 | 5  | 611  | CAAGCAGCATGAGACATTTTCTCTGTTAGAATTTGCTATTTCCATTTTGTCTAAAA      | 33616 | A_95_P016436 EB429008     |
| 34602 | 408 | 7  | 326  | CCTGGGAAAGGTTCTCTTTTACAACCTGTGGAACCCCTACTTTAAAATGGATTCATGTA   | 33620 | A_95_P099498 BP534952     |
| 34603 | 408 | 8  | 369  | GACTGAAAATTCCATTATGTGGTACTGCAAGTTCCTGACGTTGAACAACAACAAAA/     | 33622 | A_95_P099703 BP535033     |
| 34606 | 408 | 11 | 733  | GAAGCTGAGGGCTGTAGTTTCAAGTTTGTGCTGAATTAAGTAGTATTAATTTGCTT      | 33628 | A_95_P150592 EB680711     |
| 34609 | 408 | 14 | 708  | GTGACCGTGTACGCCCGTGCTTGCATGTGTATATGTTATTATTAACCTAATTTTTA      | 33634 | A_95_P296803 EB679782     |
| 34610 | 408 | 15 | 491  | TTTAAGATGATGATGACGAAAATGAGTGAATGAGGGGGCTTTATAAGCATGCACCT      | 33636 | A_95_P156102 EG650409     |
| 34616 | 408 | 21 | 841  | AGTCATCAGATGTCTGATAAATATTGCTACTACTTAAACCAGATGGCTGCACAAATCT    | 33648 | A_95_P254084 EB447452     |
| 34617 | 408 | 22 | 952  | CGTTTTTGTCTTACCTAAATGATTTAGGAATTAGGTGCTTTTGTATCATCATCTAGGT    | 33650 | A_95_P221457 TA21823_4097 |
| 34619 | 408 | 24 | 802  | TTGTCTCTGCACAAATAGAACGATCTTTTGTATTTCTACGGCACAAGATGATGTGATA    | 33654 | A_95_P126147 EB425394     |
| 34626 | 408 | 31 | 797  | CCTGTTCCAATAACTATAACCAGCATCTGTTACGATGCATGATTTTGTCTTACTGAAA/   | 33668 | A_95_P009231 TA14042_4097 |
| 34627 | 408 | 32 | 280  | GCTTCTAAGACAATCTGCAGTATTGTAATAGTACTTGTCTGTTGGTTGTGTTAATC      | 33670 | A_95_P176312 U91562       |

|       |     |    |      |                                                              |       |              |              |
|-------|-----|----|------|--------------------------------------------------------------|-------|--------------|--------------|
| 34628 | 408 | 33 | 827  | AAGAGTGC GTTGAGGATTGCTTCCTTAGCAATCAATCCAAAGGACTTGAAATCTCATC  | 33672 | A_95_P127847 | EB427398     |
| 34640 | 408 | 45 | 623  | TGGGGGAATTTTTGTTTGAATGTATCTTCTTTAAGCTTTCTACGGTGCATGGTCCAG    | 33696 | A_95_P017031 | BP530168     |
| 34646 | 408 | 51 | 795  | ATGGCAAGCAGATCAAGTCCATAAAAATGAAAAGTTAGCCATGACTATACAACGTCTT   | 33708 | A_95_P239629 | FG172966     |
| 34647 | 408 | 52 | 563  | CCAATGGTTTTGTGTTATGTTCCGGTGGATTCTTTTCCCCTGATTCTTTTAGCATTCT   | 33710 | A_95_P095938 | BP533405     |
| 34652 | 408 | 57 | 741  | CATTGATACATGGCTGTTGAGACATGGATCTTGTTCATTGTGCAAACGGACTTGTTATT  | 33720 | A_95_P161407 | EH620156     |
| 34653 | 408 | 58 | 709  | AAATATCGCCAAGTACTTTGGCAAGGGAGAGTTCTTAACTCCCAGTTCACAGATGAG    | 33722 | A_95_P305318 | FG151267     |
| 34661 | 408 | 66 | 358  | ACGTACAAATCAATCTTTTCCCTCTCAGCGAGGTTAAACAACCGAAGCAGGAAATGGT   | 33738 | A_95_P080175 | BP527942     |
| 34664 | 408 | 69 | 846  | ATGAGCTTGAAGGAAAGTTTGCAATGCTGGAGACCTCTCCGTTGATGATGATCTTG     | 33744 | A_95_P268301 | DW000560     |
| 34665 | 408 | 70 | 853  | GGTGATTGAAGGCAAACTCCCGAAGAAATACGTGAAACTTTCCATTTGCCTGATGA     | 33746 | A_95_P119782 | DV999342     |
| 34671 | 408 | 76 | 1050 | CAGTTGCCTGCAATACAGCAGTTGTATATGGTGTTTCATTGCATCATTAGTAAGTAAT   | 33758 | A_95_P178702 | TA12323_4097 |
| 34672 | 408 | 77 | 600  | TCTAGCTGAGTCTGTGCGAGTCTTTTGTTCATCGTACTTCCCATTGTATTTGAAAACCAA | 33760 | A_95_P214682 | TA20315_4097 |
| 34673 | 408 | 78 | 801  | GGCTATCCTGGAACACCTCCAGTTGTTAGACCGATGGGTATTGGCTTAAAGGATAAT    | 33762 | A_95_P150022 | EB680067     |
| 34674 | 408 | 79 | 911  | CTTCTCCTATCCCCTGTCTGGGCTAGAAATACATGAGCAGTCAAAAAGTAATACATG    | 33764 | A_95_P272741 | EB677789     |
| 34678 | 408 | 83 | 748  | TAATTCGGATAGGCCTTAGTTCTTTCTTGGCCAGTATATGAAAATCATGTGTTTTGCC   | 33772 | A_95_P028201 | TA12622_4097 |
| 34687 | 409 | 7  | 428  | GTTTCTTAGAGGATGCACTTGAGGAGGAAGAGGATACAGATTACTATGACTCTCGAC    | 33789 | A_95_P122542 | DW002519     |
| 34690 | 409 | 10 | 407  | TGTATTCTTTCTCATTGAAAAGGACTGTAGATTCAATTGTGACCGATATGCTAGAA     | 33795 | A_95_P281898 | AM802407     |
| 34693 | 409 | 13 | 1851 | CAGCAGTCAGATCAATTCTTTGTTTTCTAACTCATTATGTATTGAGGTCACTTTTGTG   | 33801 | A_95_P033379 | AJ577852     |
| 34700 | 409 | 20 | 425  | TTGGTGAATATGACAGCAGCAGTTGTATCTTGAATAATGAAATATAGATCCCGGTC     | 33815 | A_95_P130187 | EB430226     |
| 34702 | 409 | 22 | 554  | CTCCTGGTAATCAAGGAACTCCAGTTTATGTTGAAGATAACAACAGAAAGTAGAATC    | 33818 | A_95_P051766 | BP132737     |
| 34703 | 409 | 23 | 511  | TGATAGGTTTTCCGTTGAGCTTCGATGGTGGTTTTGGCCTTTATATCTAGGCTTTCGA   | 33820 | A_95_P048031 | BP131803     |
| 34704 | 409 | 24 | 791  | GGGGTTAAGACGAGCTTGTGATGAATAAGTAAAATAGATTATAGCCATACTTGTACA    | 33822 | A_95_P296503 | EB677464     |
| 34705 | 409 | 25 | 706  | AACATCCTCTGGGTTAACCTGATTGTGGCCTCAAGACGCGCAAGTATACTGAAGTT/    | 33824 | A_95_P199347 | TA16975_4097 |
| 34711 | 409 | 31 | 786  | ATTAAGAACATGGATCTTGAGATCAGACGCCGAGAATCAACAGGTTCTGGGGCAAA     | 33835 | A_95_P217957 | TA21062_4097 |
| 34714 | 409 | 34 | 738  | TGGGAGGTTTCATGGTTACTAAGCAAGCGCTAACAGCTCAGAGGCTATCTTTTCTAT    | 33841 | A_95_P149632 | EB679531     |
| 34715 | 409 | 35 | 856  | CTATGGACCTATGGGAGATATATAAACTATCTTTGAAGTAAATAAGCATGTAACCAG    | 33843 | A_95_P008566 | DV157490     |
| 34717 | 409 | 37 | 378  | AGAAGATGACAACCTGGAGTTCACATTAAGGAGGATCACGATTTATAACAGGTACG/    | 33846 | A_95_P068485 | BP137140     |
| 34719 | 409 | 39 | 854  | TCAATGTCTGTTGATGCAGTTGACGCTAGCACCTGTGATGTGAAAAGTAAGAGTGAC    | 33850 | A_95_P118882 | DV161964     |
| 34720 | 409 | 40 | 721  | TAGACATGATCTATGCAAGAAGAAAGGAGCGTGAATATTTTGCTACCAGTCCGGACT    | 33852 | A_95_P150817 | EB680938     |
| 34721 | 409 | 41 | 904  | GACTGGATATAGGATATTTGATGACTCTTCGTATCACTGCTGAAATGGTTTGATATA    | 33854 | A_95_P009346 | TC40810      |
| 34725 | 409 | 45 | 402  | TCTGGATCTGTTGCTACCCAGCCAAATCTGTGGTGTCCAAAATTTGGACTTAATGT     | 33861 | A_95_P027191 | BP531259     |
| 34727 | 409 | 47 | 438  | TGACTTTTATAGAGAGGCTGACTGTACTAACATATTTGTGGAATCAATGCCCTAAC     | 33865 | A_95_P098483 | BP534494     |
| 34732 | 409 | 52 | 758  | AACTATGAAGCCAGTGAATGTATGACTGGGTTGACAGGAAATCCTGTTTACATCCGT    | 33875 | A_95_P138352 | EB442107     |
| 34734 | 409 | 54 | 879  | GAGTGACGGTCTCTTTGCTGTGACCAAAAATTTTATACATTTCTGTACATATTATA     | 33878 | A_95_P190547 | EB425754     |
| 34741 | 409 | 61 | 588  | GCATGTTTTGTGTTAGTTTCTGTTAAGATGTACAATTGTCTGAAACTCATGATGT      | 33892 | A_95_P186437 | TA14128_4097 |

|       |     |    |      |                                                                |       |                           |
|-------|-----|----|------|----------------------------------------------------------------|-------|---------------------------|
| 34742 | 409 | 62 | 720  | CTGCTACGTGATCTCATATATGTGAAGCAGTCCAAAGCTTAAAACTTGAGTATTT        | 33894 | A_95_P000471 EH619487     |
| 34744 | 409 | 64 | 443  | TGCCCCGCATGATTGTTGTTACGACAACACATTGGCTAAAGAAAGAATCTGTTTTTAA     | 33898 | A_95_P025541 TA13897_4097 |
| 34753 | 409 | 73 | 752  | AGAAATTTCAATCCTAAAAGGGTTTTAAGGGGGGCCCTGGGACAATTTGGGTTTAAAC     | 33914 | A_95_P099958 BP535146     |
| 34754 | 409 | 74 | 403  | TACGAGGAATTTACGGCGTTATGATGGTTAATTCCAGATTGAGGGATGGAACATGCC      | 33916 | A_95_P060055 BP134901     |
| 34756 | 409 | 76 | 612  | CTTGTAATGACAATACTCAGTAGGTAAGCTGTACAAATCTTGGGTTGTGTATTATCAT     | 33920 | A_95_P236914 BP128992     |
| 34757 | 409 | 77 | 688  | GCTTCCTTAGGTTTTTGCATTATCTGGTTTTAGCCCTTTATTTTGAGACTAGTTCAGC     | 33922 | A_95_P101013 DV160879     |
| 34759 | 409 | 79 | 773  | GTAGATATTCTGGAATCTCACTTAAAGGATCTTCTTAAATATTGGAACCTGATCCTC/     | 33926 | A_95_P117532 DV160450     |
| 34760 | 409 | 80 | 385  | GGTGGAATGAAGCTGTACATTGCACAAGGGGAATTAATCTTCTGCTACTACCTCTT       | 33928 | A_95_P132702 EB433334     |
| 34761 | 409 | 81 | 367  | TTTCGCGGCTGAGGAATTGGCTCCTAGCGGATCCTAATAATAGAGAATTTTGAATAA      | 33930 | A_95_P161142 EH619888     |
| 34762 | 409 | 82 | 679  | GTAGTTTGGATTTGCTTTTTCTCGATGAAGTGCTAAAGCAATGCTTTTTGCGTTTTGC     | 33932 | A_95_P182602 TA13257_4097 |
| 34765 | 409 | 85 | 710  | GTTTCGTCGAGGTTGAAAAGTTCCTGTTCTTCGCCCTTTGTTTCATTTTATGATTTCT/    | 33938 | A_95_P207992 TA18868_4097 |
| 34768 | 410 | 3  | 779  | AGCTCTTTAAAACCCAGCCTCCCCACTGTTGAGACAGAGGAGTCAAAATTTGTACAGG     | 33782 | A_95_P141402 EB445134     |
| 34775 | 410 | 10 | 435  | GACCTCAGATTTTCTGGACACTATTTAATTTTCAGCCATAGTCATATATCTCAGTCCAC    | 33796 | A_95_P202352 TA17615_4097 |
| 34776 | 410 | 11 | 445  | CGTAGATTACTGGATGGTCTTAGAATTTGTGGTTACATCAATGGTAATGCATTGCTTT     | 33798 | A_95_P012881 GO944065     |
| 34777 | 410 | 12 | 76   | CCAAGTTGCTGACTCTGAGTTAACTGATAAAGTGGAAGAAAGATAAAATAGAGT         | 33800 | A_95_P130362 EB430388     |
| 34782 | 410 | 17 | 139  | GATTGTACCTCTGGTTTATATCTGTTTTGATTTTTGCCATCAGTTTTTTCATGCAACCTCA/ | 33810 | A_95_P109847 CV019475     |
| 34785 | 410 | 20 | 366  | TTGAGAAGCTGTCTATTATTAAGTAAACCCGTTGTTGTTGCTGGTCTGCTTATCTT       | 33816 | A_95_P107192 CV018252     |
| 34789 | 410 | 24 | 856  | TCTTGATGCAGCATATTGATGATTAATCATAGTATCCGCTCCTCAAAGTCCACGCAA      | 33823 | A_95_P125652 EB424738     |
| 34794 | 410 | 29 | 486  | TCACCAACACCCTGTACCTCAAATCTGTATACAAATAGGATAAGTTGTAACGAGGT       | 33832 | A_95_P213792 TA20124_4097 |
| 34798 | 410 | 33 | 116  | GGGAAATAGTTTCCTTAATGTACCCTTTGTCTACTTCTTAGTACTAAAGAACCCTTTAT    | 33840 | A_95_P100743 BP535504     |
| 34799 | 410 | 34 | 352  | CCACCTAAGATATATGGAGATTATCCTGAACCTATTCTCTTTAAGCTGACTTTCTTGA     | 33842 | A_95_P189317 TA14763_4097 |
| 34800 | 410 | 35 | 409  | CAGTGGCACTTCTGATTGTAATACCCAGATGCAGCAGTTTGCTATAAGATCTATCTC      | 33844 | A_95_P075045 BP526624     |
| 34801 | 410 | 36 | 839  | CCTTTATTATCACAGAGCCTATGTTTGGGCAAGAATGGATTTTGAATCACTGTATTC      | 33845 | A_95_P001126 DV158629     |
| 34802 | 410 | 37 | 849  | ATAACGACGCTGCTTTGTAGTCTTGCTAGATTTCTGGAATATATTTTCTTCGCAAGC      | 33847 | A_95_P186687 TA14179_4097 |
| 34803 | 410 | 38 | 658  | TGCCCTTGTGAATGTATAAACACATACCATATATAAAAGCGGGAATAGCGCAGAAAG      | 33849 | A_95_P203287 TA17822_4097 |
| 34804 | 410 | 39 | 867  | GTCCTGTGAGATAGAAAGAAAATTAGACCCCAAAGAGCCCTTCTTTACTTTACTACTT     | 33851 | A_95_P214792 TA20338_4097 |
| 34805 | 410 | 40 | 839  | CTGGGGTCAAAATTAGTCAGATAAGCTAAAGATTGATGTACCATCTACTATGTACTG      | 33853 | A_95_P231264 TA18923_4097 |
| 34808 | 410 | 43 | 1276 | CTGGATATGTTCTCTTGTGTTTTGTTTGTCTATCAGTGTATAATTATATGTTGGACCTC    | 33859 | A_95_P010946 TA13063_4097 |
| 34811 | 410 | 46 | 336  | TCGCTGTAACAGCTGATTAAGGCAGAGTTACTGAAAATAAATGCTCGAACGCAATA       | 33864 | A_95_P161612 EH620282     |
| 34812 | 410 | 47 | 543  | TTGCAGATGAGTATGGGATTAAGTTTTTGAAGTAAAGTAAAGTAAAGTAAAGTAAAGT     | 33866 | A_95_P248317 DV999323     |
| 34815 | 410 | 50 | 551  | GCATTTGTCGTGTTAGCTGTGGTTAAAGATGTAATTTTTCTTTGGTCTATCGACGA       | 33872 | A_95_P213312 BP534527     |
| 34816 | 410 | 51 | 869  | CTCATTTGTAATGTGAAAACACTAGTACAATATTGGCTTTTGTATCCTAGTGGAGCTA     | 33874 | A_95_P009656 TC41004      |
| 34821 | 410 | 56 | 465  | AACCCTGGCATCAACTATGAGTTAAATGTTCTTCAGTAGATTGTTTCAGTATTGAGTT     | 33883 | A_95_P140122 EB444081     |
| 34825 | 410 | 60 | 656  | AACCTGTGGCAATACTCATTGTGCAGTAGCATGAAAGCACTCCAGGATCAAATCAC       | 33891 | A_95_P161462 EH620204     |

|       |     |    |      |                                                             |       |              |              |
|-------|-----|----|------|-------------------------------------------------------------|-------|--------------|--------------|
| 34831 | 410 | 66 | 796  | GCACTCAGATTTGACACTTCTTAATTGAGGATGAGTTGCTTTATCATCCAATAGTTTA( | 33902 | A_95_P031716 | EB430603     |
| 34835 | 410 | 70 | 785  | GTGCTTGCCTGGCGTTCCTGATGTATGGAACGAGCTGCTATTTCAATTTTTGTGAAAA  | 33909 | A_95_P216172 | TA20647_4097 |
| 34837 | 410 | 72 | 723  | CAAAGGAAGCAGAATTGTTGAAGGGAAACCCTCTATTAACCAGCCAACATCTTTCA/   | 33913 | A_95_P115857 | DV158249     |
| 34838 | 410 | 73 | 753  | ATTGCTGTTGTTAAAAAGAAGAACTTAACAGGTGGATTTCCCTTTCCCCACTCTTTA   | 33915 | A_95_P192652 | EB429570     |
| 34845 | 410 | 80 | 855  | AACTTGTGGATGGGGGAGAATCACAAGACGTCATTTTATAAAGATGCTATGAGCTGT   | 33929 | A_95_P226169 | FG164977     |
| 34848 | 410 | 83 | 243  | AGGACTAAGACACAGGCATGGCGTTACCCAAGATGCTTAAAGTGTGTATCACCAATC   | 33935 | A_95_P091408 | BP531341     |
| 34850 | 410 | 85 | 642  | GTGCAACAGATGCTTTTCAGTGTCAAATGGAATATGAGTGTATGCAGTTAAACATT    | 33939 | A_95_P293253 | FG641774     |
| 34851 | 411 | 1  | 340  | AATCAATGAAACCCCTTGTCTACCTACGGTGTTCATCTATACTCTGTTTTACAT(     | 33940 | A_95_P089853 | BP530686     |
| 34852 | 411 | 2  | 285  | TGTGGTGCTCAAACGAGTTTGAATGTTAAGACTTCTATTAATCGATAAAGGGCCTGA/  | 33942 | A_95_P096788 | BP533762     |
| 34856 | 411 | 6  | 1359 | GCAGTGGTAGAATTAGAGTTTATGTTTTGATTTGATGTGAAGATACTTCCACTTATTC  | 33950 | A_95_P194042 | TA15807_4097 |
| 34857 | 411 | 7  | 562  | AACAGAGGCTCTGAAAGTGATAACTGATGTCAGAAAATCACCCAGTTCTCATCCACT(  | 33952 | A_95_P160407 | FG642013     |
| 34858 | 411 | 8  | 793  | CTAAACAATTGGGCAAGATGGGTTGATCAAAATGTTGATTCTTCCAAAACCAAAGTT   | 33954 | A_95_P126712 | EB426048     |
| 34861 | 411 | 11 | 845  | ATATTCAGAATATCAAGCGTCTGGAGCTTGCATCTTGAGCCAGCAGTGATGTCGTTCC  | 33960 | A_95_P258566 | DV999762     |
| 34863 | 411 | 13 | 836  | GATGTGAGTTCAGAAAAGAAAGAAATGTCTGTAATTGAGAGGATCCCAATTTTTCCC   | 33963 | A_95_P217462 | TA20937_4097 |
| 34865 | 411 | 15 | 911  | ATGGAAGTGAAGTGTGCAATTAAGGCGGAAATATGTTAAGTGAATGTAATGAT       | 33967 | A_95_P231739 | DV161448     |
| 34866 | 411 | 16 | 396  | AGCGAAATTTTTGCCTTGCAATATGCATTGCTACCAGTTTTTGAAGAAGCGATGTTA   | 33969 | A_95_P309073 | FG644639     |
| 34868 | 411 | 18 | 92   | CCCCTGGGAAGTCCCTCGTGTGCATCCTTATGTCTTATAAATATTATAAATAGTAAT   | 33973 | A_95_P202282 | TA17601_4097 |
| 34869 | 411 | 19 | 764  | TCGAGAATATGGACCTGAAGCTGATATTTGGAGTGTGGGAGTATCCTGTACATTCT,   | 33975 | A_95_P285493 | FJ026805     |
| 34870 | 411 | 20 | 827  | GTGTTCTTTGTAAGTGTGCAATTAAGTGTGATGTTGTTTTGATTGTCATTTA,       | 33977 | A_95_P217927 | EB438730     |
| 34872 | 411 | 22 | 603  | ACAGAAAAGTTGAGTTAGCTTTAATGTGTAGTTCACATGTAACCTTAGGAGTGAGAC   | 33981 | A_95_P025586 | FG635985     |
| 34876 | 411 | 26 | 781  | CAAATACTTAATCCAGAACTGCCATTTTAACTTGAAGGAAGGGAAAGGATTTCAA,    | 33989 | A_95_P267081 | DV158186     |
| 34881 | 411 | 31 | 739  | TTGGATCCATTCTTAATAGCAGCAGGGGAGCGTACTGAGGTTGATGATCGTTTCTTG   | 33999 | A_95_P147122 | EB451368     |
| 34884 | 411 | 34 | 797  | TATTGGTTAGCCGATTTGCCTCAGAGGGTCCAAATGGTGGTGTGTAACCTTTAAAT    | 34004 | A_95_P295298 | EB445287     |
| 34885 | 411 | 35 | 117  | TGTAAGGAAACTCCACCTCCCCCTCTAAATAATCCAAGATAATCGCATGCTGTGCAT   | 34006 | A_95_P052506 | BP132941     |
| 34892 | 411 | 42 | 380  | TGGGATAGTGTACTTGATTATGAGAATGTTGTGTTGTATATGTCGAGCGACATTTTA/  | 34020 | A_95_P092898 | BP532038     |
| 34897 | 411 | 47 | 834  | AGCTATTTACTATGGAGCAGCATGCATTGAAGCTGCAAGGAGGATCTCATGCACTGA   | 34030 | A_95_P248132 | FG174240     |
| 34899 | 411 | 49 | 609  | TGATGATCTTGGTCTAAAGGTAAAGCAGCTATATAATGCTGTTGTCAGAACTATGGT   | 34034 | A_95_P195017 | TA16027_4097 |
| 34903 | 411 | 53 | 297  | TGGGCAGTTCATGACTTTTTCTCCATGAGGGAGAATTAGATTTAATGAATTCACATTT  | 34042 | A_95_P094268 | BP532632     |
| 34908 | 411 | 58 | 831  | AGAGAACTAGTTGTTGAGCTATAGGCATCTGCTATAGGGTCTCTGTAAGAAGGCA/    | 34051 | A_95_P119397 | DV162575     |
| 34914 | 411 | 64 | 360  | GGTTAAGCAAGCTTGCAAAGCAAATACATGCTTTCTATGGCTTCAGAGTCTGTCATCA/ | 34063 | A_95_P114817 | CV021769     |
| 34926 | 411 | 76 | 1194 | CGGAGTTATGCGTAGATTCGATTTTGAATCCATTACAAATGTTTTCTTATGTTACACC  | 34086 | A_95_P195957 | TA16232_4097 |
| 34927 | 411 | 77 | 823  | TGCACTGGTCCCTGTTTTGTGATTTGGTTGGCCATTTGTTGCTGTAATTTTATT      | 34088 | A_95_P223952 | EB448995     |
| 34931 | 411 | 81 | 371  | GTTTAGTGAAGGACATTACGAGTTGCTTGAATCGAGTCTTAAATCTTAAGCTGTTT    | 34095 | A_95_P207007 | FG640440     |
| 34933 | 411 | 83 | 643  | GGAGAAAAGAAGAGCTTCTGAAGTTGTAAGTCCCTTTATCTCTCCATCACCTACA.    | 34099 | A_95_P295823 | EB448367     |

|       |     |    |      |                                                             |       |              |              |
|-------|-----|----|------|-------------------------------------------------------------|-------|--------------|--------------|
| 34935 | 411 | 85 | 442  | GGTTGTCTCGAATTATGATAGAATAATATTGAGTATTGGTACAGTGTGTGTGAAGTA   | 34103 | A_95_P147842 | EB643469     |
| 34939 | 412 | 4  | 394  | AGAGCACAAAAGGGTAAAATGCGGTTTGGTTTGATTTCTGCCTGTGGCTACTACT     | 33947 | A_95_P074980 | BP526609     |
| 34942 | 412 | 7  | 763  | GAGAGAAACACACAATCTATTCAAGGCATCATACAAATGCTGCAGTGGTTAATTTTT/  | 33953 | A_95_P267981 | FG638814     |
| 34945 | 412 | 10 | 474  | AGTTAAGAAGCCTCTGATCCCTTTGGACGTGGCATTACTGACCTAAAACCATTGTT    | 33959 | A_95_P260341 | BP128500     |
| 34948 | 412 | 13 | 482  | AGGAATCTAGTCTAGAGGAAAGAGAGCACGCTGAGAAATTGATGGAATTCCAGAAC    | 33964 | A_95_P003381 | AY083924     |
| 34950 | 412 | 15 | 831  | TCTACAGTTGGATTAGTTTTCTTTTGAACCTGAGTTACAAAGGGTGTCCGAGTCGGTT  | 33968 | A_95_P257896 | EB425483     |
| 34955 | 412 | 20 | 580  | TGAGTATTGAACCTTTTTTGCTATTAGCTTGAAGAAGCTTTCGCAATCATGGTTTTCTC | 33978 | A_95_P222237 | TA21989_4097 |
| 34957 | 412 | 22 | 806  | GGTAGAGTTTAACAAATCATATCTGAATGACCAGATAATAGCAGTTGAAGGGTTGA/   | 33982 | A_95_P216937 | EB426706     |
| 34959 | 412 | 24 | 839  | GAAGGAGAATGACATTGATTACAGCTACTCAGAAGTGTCAAAGTTTGCTACTTTCCG/  | 33986 | A_95_P252509 | EB445917     |
| 34961 | 412 | 26 | 355  | AGCCTGAGAAGAGCTCCAAAAGGTGTTGGTGAAAGTGCCTTGCAATGAACAATA/     | 33990 | A_95_P157697 | EB451576     |
| 34962 | 412 | 27 | 313  | ATTGGACCAGAATTTGGCTAAGAATTTTGGCCGGTTAACGTAATTGGGGAACCCAGC   | 33992 | A_95_P107802 | CV018537     |
| 34963 | 412 | 28 | 535  | CCCGGCTTTATTTCCCTGTAACAATGGAATCGTATTATGGAACACTTTGAGTATTGTT  | 33994 | A_95_P292693 | TC56980      |
| 34968 | 412 | 33 | 0    | TTAATAGCCCATGGTTATCCAGTTTCAGATTATGCCAGCTTGTCTGATTAGTGCTCA/  | 34003 | A_95_P311143 | A_95_P311143 |
| 34970 | 412 | 35 | 322  | GGGGTGCAAACGCCCATGTGTAAAGTACAGATGTATTACGATTTAGTAGTATTAT     | 34007 | A_95_P163212 | EH622198     |
| 34973 | 412 | 38 | 771  | AGTTGAGGTGTTAAAATGGAAAATGTGAAGTTTGTTCACCGAGTTGGCAAACCTGGT   | 34013 | A_95_P145272 | EB448879     |
| 34977 | 412 | 42 | 792  | GGACTGCTAACACTGAAAGATACAGTAATGTGTTGTTGGACTTTAATGACATTATTG/  | 34021 | A_95_P163832 | EH622877     |
| 34982 | 412 | 47 | 943  | GGTTTTGTTACGCAGACCTTTATCACAGCAGAGTTTACAAATTCATAATCGATTTT/   | 34031 | A_95_P014121 | TA13331_4097 |
| 34983 | 412 | 48 | 321  | GCCCTTTTGGCTCCTACATTTTGTGTCTCTTGCAATAAGTAGACATTGTAATTTAG    | 34033 | A_95_P083860 | BP528874     |
| 34989 | 412 | 54 | 407  | GGAAGAAGAGGGTAGAGTAGAATTGTTGTATGCTTTATTTCTACGAGCTTGAAC      | 34045 | A_95_P001956 | BP132869     |
| 34990 | 412 | 55 | 1014 | CAGAACTGAGCTTGTATTATGTCCTGATAAATGACATGGATTCTTTGAGATGTTCTT   | 34046 | A_95_P193642 | TA15715_4097 |
| 34993 | 412 | 58 | 744  | TGGTATATAATGGCACGTGAGTTGTCCGTGCAGTATGTGATAAAGATCTATCCTCTT/  | 34052 | A_95_P215337 | EH617089     |
| 35001 | 412 | 66 | 361  | GAGTGTTAGCTAGCGCTAACACCAGCATTATATCAATTTGGTTAATTCTTGTGTATGT/ | 34068 | A_95_P006701 | TA19034_4097 |
| 35007 | 412 | 72 | 707  | AAGCTCCCTAAACACCCTACATTGGAGAAAACATTTCTTTGTAGTATTACACTGTTAT/ | 34079 | A_95_P005141 | DW004395     |
| 35009 | 412 | 74 | 441  | ACACCCCTGTCAGGCAAGCCAACAATAAATACTTAATTAGGTTCTATTTTGTACTTT   | 34083 | A_95_P307333 | FG638242     |
| 35010 | 412 | 75 | 1640 | AGCAAGATGTGAACTTGGGAATCCCTATTAGTTTTCATCTTGTCAATGTTGACAT     | 34085 | A_95_P205422 | TA18285_4097 |
| 35014 | 412 | 79 | 420  | CTTTAATATCTATGTTCTGGTGGTGTGCTGATGTTGATTATCGGAGCGGCCGCTCAA   | 34093 | A_95_P276833 | AM831626     |
| 35020 | 412 | 85 | 767  | TTGCAAGTTTGATCACCCAATGACGGTATCACTTATAGCATCTCAGCATCATCCTCCC  | 34104 | A_95_P196437 | TA16338_4097 |
| 35024 | 413 | 4  | 2193 | TTTGAGATATTCTTGGATATTGTTCTCTACTGATTGAATAAACTGGTCCCAGTATTTGC | 34110 | A_95_P023156 | TA14847_4097 |
| 35026 | 413 | 6  | 614  | GCAGCTGTTCTTGATTAGTATGTACAACCTCACAGTAATCATAAAAAGAAGAGGAG    | 34114 | A_95_P031541 | EB445400     |
| 35027 | 413 | 7  | 2267 | GTGAGATATGTAGATAGTTGAGATAACACCTTTTGTACAGCAGTTCGTTACTAATA/   | 34116 | A_95_P192237 | TA15408_4097 |
| 35029 | 413 | 9  | 1186 | ATGACTGTAGTTACAATGACATTGCTGTCTCGGATTCTTATCCCCTCAAATCGGG/    | 34120 | A_95_P025491 | TA17818_4097 |
| 35030 | 413 | 10 | 631  | TTCAGTAAATTTACAATCAGAGGAAACATTCGGGATGCCAATTGAGGACACAGTACC   | 34122 | A_95_P062070 | BP135419     |
| 35040 | 413 | 20 | 872  | AGGGGAAAGAATTGGTCATGACTATTGGCTAGCTAATAACAGTACTATTGGTAACA/   | 34142 | A_95_P206267 | EB424670     |
| 35041 | 413 | 21 | 178  | ATGTATGTATGGTTGCAGCTTTTCTATATTGTTTCAGGTGAAATCCTTTTGCACAACC  | 34144 | A_95_P145687 | EB449432     |

|       |     |    |      |                                                            |       |                           |
|-------|-----|----|------|------------------------------------------------------------|-------|---------------------------|
| 35042 | 413 | 22 | 354  | AATGTCAGCTAAATTCAGGATCAGGAGTGGCATTCTCCAGAACAGCAAGGTTGATC   | 34146 | A_95_P170756 EH664976     |
| 35043 | 413 | 23 | 310  | CATTATTGCTCCACGGTAGAATATGTTTACATTGGTATGCCGGTACACAATTGTATCT | 34148 | A_95_P058011 BP134362     |
| 35047 | 413 | 27 | 1005 | TTACTACCAACGAACTAACTGGGTATCGAGGAAGCAAAGAAACAATTTTGTCAAATG  | 34156 | A_95_P015121 TA14613_4097 |
| 35049 | 413 | 29 | 825  | CCCACACCATCACCACCAAGAAACAATGATGGATGTCAGCATGCTCATTTGAGATCAI | 34160 | A_95_P303938 FG153238     |
| 35050 | 413 | 30 | 706  | GAGACTTTACGGGAGGGAAAGAATTCAAGGTTACGAAGTGCCTTTTTATTTATTTAA  | 34162 | A_95_P213912 TA20149_4097 |
| 35052 | 413 | 32 | 323  | GCTATAATCGAAACCTTTAATAAGGTTGTTTACTATCCTGTGCTCTAGGTTGTGTTAC | 34166 | A_95_P095678 FS436463     |
| 35053 | 413 | 33 | 842  | GTGCCTTATTGTGTATAGTGTGTGAAATTGAAGTGCAAACCTTCATCTCTTGTATATC | 34167 | A_95_P015691 EB439026     |
| 35056 | 413 | 36 | 616  | AGCAAAGACAACGATAATCACGGCATCAGGATTATTGGAACAGTTTTAACATTAGTT  | 34173 | A_95_P025256 TA17895_4097 |
| 35060 | 413 | 40 | 1332 | ATATAGATCTGGACTTGTGCTAATGGAGCTAATACGATTGGTTTGGACTTACAATAG  | 34181 | A_95_P026301 TA15688_4097 |
| 35062 | 413 | 42 | 214  | CATGCTAAATTTTGTGGCATGTTTAGTAAGTTTGTTCATGATCTTTCGGTGGTGC    | 34185 | A_95_P029811 DW000198     |
| 35065 | 413 | 45 | 895  | TTTTCAGCCTGATAAAAACTCCCTTATAGTCACCATTGGAGATCTCTTACAGACATGG | 34191 | A_95_P135267 EB438588     |
| 35066 | 413 | 46 | 370  | CGAGAAACCGAGAAAAATTCATAAGCCTTTGAAATCCTTTCTCTGGGTTCCACTAAA  | 34193 | A_95_P095423 BP533190     |
| 35068 | 413 | 48 | 812  | TTTATTCTAGTGGTGAGCTGGACAGAGTGCAGTTGTATTGTGAGAGCTTTCCACCA   | 34197 | A_95_P251472 EB678121     |
| 35071 | 413 | 51 | 716  | GTAGGCAGCTCGCATCCAGCTTCTTCGTCCTCAATTCATATATATTAGTATTAATTTA | 34203 | A_95_P209612 TA19228_4097 |
| 35072 | 413 | 52 | 699  | TAGGATATTTGAATGTGTTTTACCTCTAGCTTTGTCAATGCTATTGGCAAATTGGTC  | 34205 | A_95_P268766 DW002962     |
| 35086 | 413 | 66 | 829  | CCTAAGTGTTGCAGCAGTTGTGATAGATTGTTGCAATTGCAGAAGAATGATTACTA   | 34233 | A_95_P267046 DV157983     |
| 35089 | 413 | 69 | 0    | GCGGAGTCATGTATCTCCTTTTTATTGCAAGTTCATGCGAAGATAAAGAATACAATAA | 34239 | A_95_P008766 A_95_P008766 |
| 35090 | 413 | 70 | 287  | GGATCAGATAATGTTGCTCTGTACTGGATCTATAAGGTGAAAGATTGATGTAATTT   | 34241 | A_95_P041106 BP130008     |
| 35092 | 413 | 72 | 273  | CTAGGGTTCTGGAGGTGATTCTTCTCATGTTCCATTTTTCGTTAAAAATAGAGTAAT  | 34245 | A_95_P156337 EH613699     |
| 35096 | 413 | 76 | 789  | TTTGGGGCGGGATGTTGATGACATAATTTGATGGTTATATAGAATTTTGTCTGTCC   | 34253 | A_95_P267436 DV160203     |
| 35104 | 413 | 84 | 353  | CTGCGGTTCTTCTAATTTTCTTGATTGTTCTATTAGCATTCCATATTTGAGTGTGAGC | 34269 | A_95_P077605 BP527294     |
| 35115 | 414 | 10 | 791  | TTTCAAAGATGTTGCCCGTGTGGACTCTGTTTCTGCTTAAGATTTTAGATGACCATGT | 34123 | A_95_P117897 DV160864     |
| 35116 | 414 | 11 | 837  | GCCCTCACCAGTGGAACTCCAGAATAGAAAAGATTTAATTTGTGCAAACCAAGGTG   | 34125 | A_95_P196297 DV159106     |
| 35120 | 414 | 15 | 329  | CAAATGGACTTGAGCATATTGTTGAAGTGATTGAGGGGTCAATGGAAGATATTACTC  | 34133 | A_95_P085755 FG134245     |
| 35122 | 414 | 17 | 489  | TCCTGACACTCCTTAAGTTTCTCCTGCACGTGTCTCCTGGCACAAAAAAGAAAAAT   | 34137 | A_95_P035973 BP128611     |
| 35124 | 414 | 19 | 789  | ACTGATCTCTCAAATCATATCATCCTTGACCACCTTATTACGGTTTGAATGGGAGCC  | 34141 | A_95_P162452 EH621397     |
| 35132 | 414 | 27 | 2084 | AATAGATAGCAGGGCATATTTGCAGCTCCAAACTGGGTTTCGTTGAATATATTTACTC | 34157 | A_95_P011311 X83524       |
| 35138 | 414 | 33 | 1419 | CCTTGTTGAAGTGAACCTACATCATGTTATCCTTTTGTGGTTTTGCGGAGTTATTA   | 34168 | A_95_P012552 TA13054_4097 |
| 35139 | 414 | 34 | 1009 | GTGGGCAGCAAGTTGGCTATATCATGCAACTGGAGATCAATCATATTATGATTATGC  | 34170 | A_95_P201147 TA17362_4097 |
| 35141 | 414 | 36 | 583  | GAGACTACTAGTTCTTCTCGGCATCAGTTGCAAATTTGCATTTTGTCCAAATTTTGT  | 34174 | A_95_P034324 TA13389_4097 |
| 35143 | 414 | 38 | 818  | GTGGATCGCACTGTCCCTGGAAGATTGAAAATAACTGTCTTTTTTGGTGGCTGGTA   | 34178 | A_95_P205967 EB439676     |
| 35145 | 414 | 40 | 711  | AATCCCAAGTTTGTATGGATGAATGCTATGACATGGAGCTCTATGAATGGAAGGA    | 34182 | A_95_P257876 TA12452_4097 |
| 35149 | 414 | 44 | 655  | ACGGCTATCCAAGTGGTTTTAGTCTAGGTTTAAAGAGGAGTGCAGCTTTTGTCCAGT  | 34190 | A_95_P284343 FG190019     |
| 35151 | 414 | 46 | 694  | ATGTTCTTGCTCTCGTGCATCCTCTCATGGACAGATAAGTTTGTTCAGTGTGTTT    | 34194 | A_95_P164922 EH624378     |



|       |     |    |      |                                                              |       |              |              |
|-------|-----|----|------|--------------------------------------------------------------|-------|--------------|--------------|
| 35152 | 414 | 47 | 845  | TTTGGTGCTGCTGCTTCTATGTTGTTGGGTTTTGGTGCCTGGTATTGGTATTTACCA/   | 34196 | A_95_P150122 | EB680202     |
| 35157 | 414 | 52 | 372  | AGGTTACATACTATAGATAAATCAGCTCTATCAAGCTTTGATAAGCAGCATTTTGGCA   | 34206 | A_95_P124812 | DW004608     |
| 35159 | 414 | 54 | 417  | ATGAAACACTTAGATTCTGGAATGTTTTCCCTTCTCCTAAATCTAAGAACACCGAGAC   | 34210 | A_95_P059740 | BP134816     |
| 35161 | 414 | 56 | 851  | AAGGGCCAAGGATGGAGGTAAGAAGTTGATGGATTTGGGACTACAATTTATTGACA     | 34214 | A_95_P231554 | DV159738     |
| 35163 | 414 | 58 | 675  | GCAGGTGATTTTTTCATTGAGTTTGATACCTGACTGGATATTTAATGGGTTATATCTG   | 34218 | A_95_P205342 | TA18263_4097 |
| 35170 | 414 | 65 | 2517 | GATTGGCATCCTTGTATTTACCTTTTCGGGGATCACATTTATGTTAATCTTTTATTCCTG | 34232 | A_95_P177082 | TA11872_4097 |
| 35171 | 414 | 66 | 442  | TTACTGCCGTATTTATGTTAATGCACTTTCTAATGATACGTAAACAAGGTATTTCTGGC  | 34234 | A_95_P211867 | ES659053     |
| 35176 | 414 | 71 | 518  | CTTGGTTGGATGCTGGACCTCTCAATATTCGTTCAAATGCCCCTGGCTTTTATGTTG    | 34244 | A_95_P049106 | BP132084     |
| 35177 | 414 | 72 | 838  | CAGGAAGTTTTAGTTATGTCCTAGTTTATGTTAGCTGGTCTGTATAGCAGCTTTTGA/   | 34246 | A_95_P289868 | EB451794     |
| 35180 | 414 | 75 | 783  | TTCAAGCTCCCTAAAGTGGTGGACAAGGATACTACAATGAGTTAACTTTGATCCTTGT   | 34252 | A_95_P135872 | EB439421     |
| 35182 | 414 | 77 | 630  | GGAGATGTATTTCAATGCCTGCTTGAACATAGTGGAAAGTTCTTCAAACCATTA/      | 34256 | A_95_P047651 | BP131711     |
| 35190 | 414 | 85 | 823  | TTGGATACCGAAATCATTGTTGCTGCTGCAAGGGACAAAATACAAATGCAACCGCT     | 34272 | A_95_P027016 | EB437209     |
| 35194 | 415 | 4  | 877  | GCTAGACAATAATCCCCTCAGACAGATACCATCCTCTGCATTTCAAGTTGTATCCAAG   | 34279 | A_95_P260521 | EB428364     |
| 35198 | 415 | 8  | 902  | TTGGAGTAAAGCTCGCTCAATTAATGCACAGTTGAGAGTAAAGAATGTTGGGATGCC    | 34287 | A_95_P115517 | DV157766     |
| 35201 | 415 | 11 | 86   | GCTTGAGGGTACTTCTGTGTGATGTTTAAAGTTCATTTCTACTGATATGTTACATATC   | 34293 | A_95_P003726 | EB434979     |
| 35202 | 415 | 12 | 670  | AAACAAAAATTTGACAGGAAGTCTAGATACGCAAGCATGAATACTCATCTTGGCAT     | 34295 | A_95_P137352 | EB428048     |
| 35207 | 415 | 17 | 1260 | AATCTGTCTGCATAGATGGGTATTTTAAACAAGATGTACCAAGACAAATCGATTGCG    | 34305 | A_95_P201527 | TA17444_4097 |
| 35208 | 415 | 18 | 503  | ACATAACAAGAAGCCCGAGATCGAGTGTGAGGAGAGTAAAGAATCGATAACCTAT      | 34307 | A_95_P124392 | DW004227     |
| 35210 | 415 | 20 | 530  | CACAATTAGAAGAGAGTTGAGACAAGCTGCGAGACCAAGAATTATGTTGGGCATTA     | 34311 | A_95_P010181 | BP133122     |
| 35215 | 415 | 25 | 677  | GAGTCCTTAAACAGCAATTTTGGAGTTGTACATACAGTAATGATTTGTCAGATGAAT    | 34321 | A_95_P146852 | EB451002     |
| 35217 | 415 | 27 | 469  | AGTTCAGGGATCCTTCGAGGATGGTATTGGACCCGGAGGCAATATTATTCATGTCTT    | 34325 | A_95_P031426 | BP529158     |
| 35218 | 415 | 28 | 352  | CTGTTAGCTGTTTGAATGACAAAGCCTCCACAATCCCATTACACCAAAGGTCTAT      | 34327 | A_95_P111627 | EH617531     |
| 35219 | 415 | 29 | 796  | TTGTTGCTAGAGAATGAAAGATTGGCGGGGTCTAAATGAAGGATTTTGTAGTTTTTG    | 34329 | A_95_P124082 | TA15549_4097 |
| 35222 | 415 | 32 | 541  | TGCTTCTAGTATAACTAATGTCTTTTCATGCTGCTGTTTTTGAACCATGGAGGACTTT   | 34335 | A_95_P139737 | EB443648     |
| 35224 | 415 | 34 | 841  | GTCTCAGCTTGAAATTAATGAAGGATGGTTCCTTACAAATGAACAATGAGACTAGAT    | 34339 | A_95_P267901 | DV162604     |
| 35225 | 415 | 35 | 297  | AATGGTTGCTAATGTATTAATGTAGGCTGAACCAAATCTTCAAACGTGAAGTTGTTG    | 34341 | A_95_P080795 | BP528099     |
| 35229 | 415 | 39 | 1247 | ATGTGCTTTGTTTACTGAGGTCTCAAAGATGTTCTATTCTGTTTCTGTTTCGCTGTTCT  | 34349 | A_95_P001736 | AB032546     |
| 35230 | 415 | 40 | 785  | TTGTAATCCAGTATCATTTTTTGTGTGGATGTCTTTTGAAGCGTTTTGCTTGGAGTTGT  | 34351 | A_95_P271421 | EB443290     |
| 35234 | 415 | 44 | 676  | CTCAACAATCCAAGAGAGAATAAATGTTGACTAGAATGATATATAGGTTGCCCAA      | 34359 | A_95_P183622 | TA13500_4097 |
| 35235 | 415 | 45 | 842  | TAATTCCTGAATGAGATATCTAATGAGTGCACGGAATTACTTCCCAGCCAGACTGC     | 34361 | A_95_P289213 | DV158089     |
| 35236 | 415 | 46 | 1300 | TGTCGAGACTCACCCATTGTCTAGTTTGGTTTGAATTTGGAGATGCACAAGAGAGAG    | 34363 | A_95_P207152 | TA18678_4097 |
| 35244 | 415 | 54 | 628  | TAACACGAAGAGAATTATCCACATGACCAAATATCCACTTTTTCTCCATCGTATCCTT   | 34378 | A_95_P316723 | FG192477     |
| 35247 | 415 | 57 | 595  | AGGACGTTGTAGGAGTGGATGTTGTTATGCACGTAAGGGCTAAAAAAGATGACGGA     | 34383 | A_95_P137772 | EB441552     |
| 35248 | 415 | 58 | 797  | CCTTGGATGTCCATAGATAATGTGCCTCGTTAAACCTTATTAGGAAAAAATCCTATG    | 34385 | A_95_P120152 | DV999904     |

|       |     |    |      |                                                             |       |                           |
|-------|-----|----|------|-------------------------------------------------------------|-------|---------------------------|
| 35255 | 415 | 65 | 323  | GTTAGTAGGGGTGTGTATGGATATCTTTCCCTAAAAAGTAATCAAACCAAATAAGT    | 34399 | A_95_P214292 TA20231_4097 |
| 35261 | 415 | 71 | 837  | TATGGAGGTTCTGTAAATGGAGCTAACTGCAAAGAGTTGGCAGCACAACTGATGTC    | 34411 | A_95_P217862 EB426276     |
| 35263 | 415 | 73 | 475  | TGTCACCTGGTGTAGTCTTAGAGTTTGTAACTGAATGGCAAATTGGAGAACTTGTTG/  | 34415 | A_95_P257344 EH623258     |
| 35267 | 415 | 77 | 72   | TAAAAGGCGACCTTGGATTGGACATCACCTTTTTGGAGTCTTTTTGGAGAAATGTGC   | 34423 | A_95_P116807 EB681743     |
| 35268 | 415 | 78 | 811  | TTTTATTGGTTCGTGACCTTAGAAAACGAACCATGGCAGTTCTCTTCTGTATCAATT   | 34425 | A_95_P126282 EB425543     |
| 35269 | 415 | 79 | 824  | TCCATATAAGTTTCGGCTAGGCGACAAAGACATCATAGAGGGATGGAACCTTGGTCT   | 34427 | A_95_P272661 EB680239     |
| 35271 | 415 | 81 | 882  | AGATGTACCCGCTTATACTTGCTTCAGGAAAATCAAACGTCTGTAGCTTCACCATAGA  | 34431 | A_95_P271396 EB443151     |
| 35273 | 415 | 83 | 795  | CATAGGAAAATACATGTAGATCCTTCTTTTTGCTCTTCCCTGTTAATATTAGTCCTC   | 34435 | A_95_P149832 EB679803     |
| 35277 | 416 | 2  | 428  | CGAGTGAGATTGTATATGCAATCATCATTTACCAGATTAGATGGTTAGGCTTCTCGTT  | 34276 | A_95_P072945 BP526087     |
| 35278 | 416 | 3  | 540  | AATTAAGATGTAAAATGTCGATGGCCTATCGGAAACAGCTTCTTACCTTCTAGGC     | 34278 | A_95_P161147 TA15777_4097 |
| 35282 | 416 | 7  | 801  | GTACACACAGGTTCAATGCATACTACGTGCTCAGAGTTCTAAATTTTTGTATATAG    | 34286 | A_95_P267536 DV160564     |
| 35283 | 416 | 8  | 334  | GTTTCATCTGTTTCATTCTAATTTTTGCTTTACATTCCCTGAATGAATCAAGTCTTGG  | 34288 | A_95_P103312 CV016454     |
| 35284 | 416 | 9  | 806  | TTTCAGTTGGCATGCGGTTCTTTTGCTTGTGTATTCTACTGCAACTCTCACTGTTG    | 34290 | A_95_P202842 EB426615     |
| 35287 | 416 | 12 | 879  | GGACCCGAAAATATATTACCAATAGATGGATCTGCACCGTCAGACCGATCATAACA    | 34296 | A_95_P165392 EH663669     |
| 35292 | 416 | 17 | 631  | CAACGTTTTAGCCTGGTAGTCGATATTGATGGATTGCATAGAGTTCTTTGTTAATTT   | 34306 | A_95_P020286 DW001539     |
| 35295 | 416 | 20 | 794  | TCTCAATTCCTGCCATCCTGAAGTTGGCTGATACCCTTCACTTGAAGTACAAGCTGT   | 34312 | A_95_P185957 TA14025_4097 |
| 35297 | 416 | 22 | 721  | TGTGAATGCTCTTAGTGAAAGGCAAAATGGTGCTTACATGTCATAATTTTACACA     | 34316 | A_95_P209072 EB681340     |
| 35301 | 416 | 26 | 629  | ACTATGTCCAATAAGTTTGATGCTGCAACTCATCCGCAATATTAGTTTTCTTTGGCA   | 34324 | A_95_P017701 EB436446     |
| 35302 | 416 | 27 | 1269 | GTAGTTTTGGATTCTAGTTTAAAGTTAAAGGATATGTGGTGTGTTGAGTGTGCTTCAAC | 34326 | A_95_P012956 TA14617_4097 |
| 35304 | 416 | 29 | 0    | TCTTCTTCTTATGTTTCTTCTTTAGAGAAAAATAAACCAACTCCCCCGGCCGTAAT    | 34330 | A_95_P009041 A_95_P009041 |
| 35307 | 416 | 32 | 798  | ATCTGTGTAAGTTATCTCCTTCTGACAGCCAATTCTATGTCATATTCTACAAAGCAGA/ | 34336 | A_95_P021301 EB679795     |
| 35309 | 416 | 34 | 440  | TATGGTATGTCTTCACTGAGGCAGGTTAAACAGAAAGCTTTGGTTGAGTACAGGTC    | 34340 | A_95_P092933 BP532056     |
| 35310 | 416 | 35 | 378  | TTCATCCTGAATTTGCTGCAGATCCTCGAAATGTACGACTTGGCCTAGCTAGTGACAG  | 34342 | A_95_P097513 BP534081     |
| 35313 | 416 | 38 | 515  | GTCAGCTTCTATTTCTAGCACTTTGATAACTATTGTATCAGTGTGATCTTCTCAG     | 34348 | A_95_P157672 FS433102     |
| 35319 | 416 | 44 | 602  | GATGGCTGATGTTTCAGCCAATTTGTTAAATCTTATAGCCACCTTCTGTGTTATGC    | 34360 | A_95_P213522 EB443490     |
| 35321 | 416 | 46 | 873  | TTAATTTCTAGTGATTGATGGTGTGGGAATGCCTGTAATGGTAGCGAGGCGTGTGTC   | 34364 | A_95_P200802 EB449689     |
| 35325 | 416 | 50 | 829  | TTGGCCAGGCTTTTAACTTTGCAACAACCTTCTGTCCCCATTAAGATGCTGTTTCC    | 34371 | A_95_P235354 EB681365     |
| 35327 | 416 | 52 | 701  | TAAAAGGCAAAATTTGCAACACCTCAAAGGCTGATGGTGAGAAAGGTGCTGTCC/     | 34375 | A_95_P269041 EB428281     |
| 35328 | 416 | 53 | 608  | TGGACAAGATTATCAGTACTATTAACCTACATCCAATAGAGGTTGCTGTTTACTATC   | 34377 | A_95_P179477 TA12516_4097 |
| 35331 | 416 | 56 | 844  | TTAGTATGCAATGTATATGTGAATGAGCTTGTGTAACCTAAGCGTGATACCTATCTC   | 34382 | A_95_P270721 EB443132     |
| 35335 | 416 | 60 | 824  | GAGCTAGAATTGAAGACGTACATGTGTTCCAGTTGTAGTGCATCTTATTATGTTAC    | 34390 | A_95_P120112 DV999849     |
| 35336 | 416 | 61 | 506  | TCCCCTGAGAAGCTGTCGTAGATTTACTTAGTTCAAATATAGGATCTATGTCCAAGT   | 34392 | A_95_P269116 DW004091     |
| 35344 | 416 | 69 | 1054 | GATTTATCTACCATGATACGTGCTCAAAGGCAGGCAATTGATGAAAAGATAAGGGAC   | 34408 | A_95_P219347 TA21376_4097 |
| 35349 | 416 | 74 | 544  | ATGTGTGAAATCAACACTTAATGTACTCGATAAGGTTCTGTGCTTACATTATTGTTCT  | 34418 | A_95_P024916 TA20830_4097 |

|       |     |    |      |                                                              |       |              |              |
|-------|-----|----|------|--------------------------------------------------------------|-------|--------------|--------------|
| 35350 | 416 | 75 | 420  | ACTTGAGTTGATTAATAAAAAGAAAACCTGATTAGGCGCAGCTTTATCTGTTGGGTCATC | 34420 | A_95_P097178 | BP533913     |
| 35351 | 416 | 76 | 652  | GCTGGTGGAAGAAGATTTATTTTTGGGTTACTATTAGAATAGAACTTAAGGACCTTC    | 34422 | A_95_P257861 | DV158996     |
| 35360 | 416 | 85 | 818  | TCCTTTCGCACATCCATTATTTGGTGTACGCTAGATAGTCCTTCTCTGGTTGTATTTTTI | 34440 | A_95_P025081 | DV159714     |
| 35373 | 417 | 13 | 859  | GATGCTAATTTGATTTTCTGCTGATCTTCATTCTTTTTGGGAGCATAGTAGGTATAGG/  | 34465 | A_95_P182217 | EB448209     |
| 35375 | 417 | 15 | 382  | ATCCAGTCAATAAGCTCAGCAAGATTATGGTACTTTTTATGCTTTGCAAACATCTTTACC | 34469 | A_95_P064090 | BP135954     |
| 35378 | 417 | 18 | 160  | CACCCCTATCCCTGTCCTTTTATTATGAGTCAAATTTGTAAGTAAATTTGACATTTT    | 34475 | A_95_P181772 | EH613905     |
| 35383 | 417 | 23 | 315  | GGAATTGATCGTTGGTTATGTTTGGTCTGAGTCTAAGAGTCTTAAGTATGTATTATGC   | 34485 | A_95_P133202 | EB434505     |
| 35384 | 417 | 24 | 679  | CAGGAATTCAGGTTTAATATGACTGATATTCTTTTAGAAGGTGAAGCATGCAACCC/    | 34487 | A_95_P013241 | EB682934     |
| 35386 | 417 | 26 | 880  | GCAAAACGTTTTCTGCATCCTGACATTGTAGCACCTTATGACTATATATTCATCTGGG/  | 34491 | A_95_P227529 | EB428349     |
| 35388 | 417 | 28 | 669  | ATGTCTGGAATTCAGATGTAAACAGAGTCCGGTGAAGTTTTGAAGCTTGGGGCA/      | 34495 | A_95_P284843 | FG199640     |
| 35391 | 417 | 31 | 1397 | TTTCAAGTTAATGCTCTACTTCCAAGACTGAACCACCAAAACGACTGTCTCAAATACC   | 34501 | A_95_P007806 | TA13797_4097 |
| 35392 | 417 | 32 | 566  | TGTTTGTAAAGAACAGTGCTCATTTTGTTCCTACACTGTATGTTATTGTCCGAACTGT   | 34503 | A_95_P212307 | TA19805_4097 |
| 35393 | 417 | 33 | 1223 | CTTGTTTGTATGTAATGTTTGTCTTGATGTGATTGTGATGGCCATTGTTGTTCTGT     | 34505 | A_95_P023056 | TA15890_4097 |
| 35396 | 417 | 36 | 682  | CTTCGAAAGCTAGCAGGATCCTCATTCTGATGTCAGAAGGGTAATTAATTGATGCA'    | 34511 | A_95_P141887 | EB445505     |
| 35397 | 417 | 37 | 320  | TTGCTCTGGTGTGTATTCAGACAATTTCAAGTCTTCAGATGATGTTCCAGTTTTAT     | 34513 | A_95_P307638 | FG638976     |
| 35401 | 417 | 41 | 616  | TCTGTTTTGTATCTTGTCTGTAGTCGAGTCTGTTAAAGGCGTGTGGATGTGAATTTI    | 34521 | A_95_P015871 | TA12007_4097 |
| 35402 | 417 | 42 | 754  | TGAATCACATCAAGAGAGCACCGAGAAGGTTATGGATGATCCCTGGGGATCTGTTA/    | 34523 | A_95_P268546 | DW002999     |
| 35403 | 417 | 43 | 145  | CCCTCCGAGCAGGCAGATTATATAGCTTAGATATACAGTAATAAGGATGTATGCTTTI   | 34525 | A_95_P141997 | EB445585     |
| 35404 | 417 | 44 | 742  | TTGCATCAGATGGCTTATGGGAACATCTCAGCAATCAAGAGGCCGTTGACATTGTGA    | 34527 | A_95_P146552 | EB450614     |
| 35405 | 417 | 45 | 575  | AAGGCTTACTTTATTAGCCCTCTGTTTCTGTCGTCTATTCTGTTCTGGAGAAGTT      | 34529 | A_95_P023296 | TA15396_4097 |
| 35408 | 417 | 48 | 771  | GCTTTTCTCTTAGTAGCAATATGTACTTATTTTTGTCTTGATGGGTAAGTAGCTCCTGA  | 34535 | A_95_P010401 | TA13834_4097 |
| 35409 | 417 | 49 | 1017 | GACCATGGAATTGATGTTGATGTATAATATGACATGGGAATGCTCGTTAAATGGTTG    | 34537 | A_95_P181422 | TA12976_4097 |
| 35411 | 417 | 51 | 686  | CTTCATGTGGTCCAGTTTCAAGTAATTGAGCTTTATCATTTGTTAGCTTCACTATCTGT  | 34541 | A_95_P000411 | EH618900     |
| 35413 | 417 | 53 | 641  | CAAGAACGGACAGTCCTGATGCCTATGATTGTATTAATTTGATTACTAACAGCTTGAA   | 34545 | A_95_P124572 | DW004363     |
| 35416 | 417 | 56 | 761  | CCCAAGGCTAGGATTCGTTAGATCATGTTATGTGTACACAAGTTATATTTGTATGTAA   | 34551 | A_95_P128342 | X51426       |
| 35418 | 417 | 58 | 680  | GGTCTTTTGGAACTTTTGTCTTTTTGGTGTGGATGAATGACTTTTAGACAGCTCTGT    | 34555 | A_95_P148832 | EB678367     |
| 35422 | 417 | 62 | 238  | CCTTATTCCTATTATCCCTTCCCTACGGCAAAACCGGAACAAATGGTTGACAGTGCA/   | 34563 | A_95_P070190 | BP192547     |
| 35426 | 417 | 66 | 413  | ATTCAAATTTCAAGGTCATTTGGTCTTACTACCTAACTACAAATAGGGATCGATAGTG   | 34571 | A_95_P132202 | EB432654     |
| 35428 | 417 | 68 | 304  | AATGGACAAGTATCCACCGGTACCATTTTATTAAACAAGTCAATGGTTCCTTCGACC    | 34575 | A_95_P162153 | FG642918     |
| 35430 | 417 | 70 | 856  | CTGCAGCAAATATTTATCTGCATTATTAAGGGTTAATCATGTTCTGATTTCCAAGTCT   | 34579 | A_95_P183632 | TA13502_4097 |
| 35433 | 417 | 73 | 831  | CCCTCTCTGGATTTTATATATCTGTGCATTGTGTGTAATACTATGTACTTTACAGTGA   | 34585 | A_95_P021291 | EB426312     |
| 35438 | 417 | 78 | 660  | GCCACTACCTATTGGCATGGGTTTTTATGATGTTTCATCGATTGTATCAGTTAGTTAG   | 34595 | A_95_P153597 | EB683838     |
| 35441 | 417 | 81 | 897  | TCTTCGCCATCTGATGGCAAGCTTGATGTGTCAAAGGCTTTTCTACTGTGCTTGTGAA'  | 34601 | A_95_P011651 | AB079023     |
| 35443 | 417 | 83 | 395  | AAATATTTCTTCTTTGTCTCATATCTGAAGAGCAAGGATGCTAGTGACGGTACTGA     | 34605 | A_95_P109977 | AY074787     |

|       |     |    |      |                                                              |       |                           |
|-------|-----|----|------|--------------------------------------------------------------|-------|---------------------------|
| 35449 | 418 | 4  | 734  | GTGATTTACTTCTTCTTGCTGAAACTGTCTTCTAACATAGTTTCTCATGCATGTCAGAT  | 34448 | A_95_P117472 DV160392     |
| 35452 | 418 | 7  | 1337 | GATTGTCTGTCTTCTGTTGATTAAGCTGCTGTCTATCCCAATGAACATGTTAAATTTG   | 34454 | A_95_P074840 TA15200_4097 |
| 35453 | 418 | 8  | 811  | GTCAACAATTACTGCGCGAGCTACATTTGATGTTTGATAGTTCTTGAGGATAAATTT    | 34456 | A_95_P126997 EB426416     |
| 35454 | 418 | 9  | 372  | TGAATTTCTAAGAGTCAAATGGTTTACACAGATCAGACATCCAGTCCAAAAGGCATG    | 34458 | A_95_P154607 EG649670     |
| 35456 | 418 | 11 | 538  | TGATAGAGAAAAGGGTGACGACGACAGTGATGTTATAGTCTGCCCATGTATGTATTC    | 34462 | A_95_P035183 BP128398     |
| 35459 | 418 | 14 | 717  | AACACTTTCTTGATGCTCTTGACCAGATTATGAGCCCAAAGGCCAACAGAACAAGCC    | 34468 | A_95_P164417 EH623650     |
| 35461 | 418 | 16 | 191  | GCACGGGGACAAGAATTTGCTTGTGTCATAATAATATGCTGATTTATGCTTTTTTGAAAG | 34472 | A_95_P032171 EB436705     |
| 35463 | 418 | 18 | 1111 | ATGTAAGAAATTGAAAACAAGGGAATTACTATGTATTGTGTGGGAGGTGTCATG       | 34476 | A_95_P141752 TA13567_4097 |
| 35464 | 418 | 19 | 557  | AAATTAATACTCCTTTCTTTCTAAATCGCCCGAAGACCAGACGTCGGAAAAGGT       | 34478 | A_95_P038141 BP129188     |
| 35466 | 418 | 21 | 634  | TTTGAGGCGCGCATACACAAGGGGAATTCCTTTCTGTCCAATACAAAATTTAATATA    | 34482 | A_95_P134777 EB437551     |
| 35467 | 418 | 22 | 832  | TATCCTCCTCCTGGCTATCAGAAGTGATCTTTCGAAGGATTTGGTGCATCATTCTATT   | 34484 | A_95_P147202 TA15797_4097 |
| 35470 | 418 | 25 | 472  | TGTGCACTTTGCAGTTTTGCTGTATGTGTCGACTTAATTTTATCCATGTTGATAATGAC  | 34490 | A_95_P125337 DW005129     |
| 35476 | 418 | 31 | 598  | ATAATTAGGTTGGAGCTGAATTTCTACTAATTTGCATTCTGAATGCCTTGATGCATGA   | 34502 | A_95_P019976 DV162200     |
| 35480 | 418 | 35 | 691  | CCAGTTATTGGTAGTGCTGTGAAGGGCACAAAGGTTAAGTTATTGGACATAACAGCT    | 34510 | A_95_P280038 FG194561     |
| 35482 | 418 | 37 | 106  | AAGGATGTTGAAGTGAAGGATTCAACCAGGATTAATATGTCTATAACTAGTTGTA      | 34514 | A_95_P107057 CV018193     |
| 35484 | 418 | 39 | 491  | TGAGTTTGGTCGAGACAATAAATGATAATGAGTGGCGGCCCTCTGACTTTGGCCAT     | 34518 | A_95_P010846 DW004048     |
| 35488 | 418 | 43 | 395  | GATTTGTTTCTTGGTGGAGAAACCATGTAAGAGGGGAGTTGCCCTTTCTGATTTGAA    | 34526 | A_95_P102997 FS417555     |
| 35490 | 418 | 45 | 857  | GGTCTTCATTGCGTTGGTTGTTATAAACTCTCATGATCAAATCTTGTATCTATCTCTC   | 34530 | A_95_P008091 DV162582     |
| 35491 | 418 | 46 | 355  | TTCTTGGTTTTGGGGAATATATAGAAGAAGTATATGCTGCATATGAACAACACAAGC    | 34532 | A_95_P146258 FG643952     |
| 35495 | 418 | 50 | 833  | TCTCCAGACTTTGGATAAGAGAAAAACACAAAGTGGATGGACCAATCTTTATTATTCTT  | 34540 | A_95_P252444 EH615331     |
| 35497 | 418 | 52 | 798  | GATGAGGCTAGGCAAAGGAGTGAACAATTAATATGCAAGGCAGATGGGACTTCTTC     | 34544 | A_95_P209187 AB379974     |
| 35498 | 418 | 53 | 406  | TTGACACCAGGGGGAAATTATGTGTCTATTCCTCTGTAGTAAGGAAGAGTAATGGAC    | 34546 | A_95_P105447 CV017464     |
| 35502 | 418 | 57 | 1233 | CATTACTCAAACGTTTGATTTGCTGGGATATACCCCAAATTTGCAACTTTTGTGATC    | 34554 | A_95_P207332 TA18717_4097 |
| 35505 | 418 | 60 | 494  | ATGCTCAATGAGCTTCTAGTTTGTAGCTACGAGTATTGAGTAAAAAGTTGTAACAG     | 34560 | A_95_P142397 EB445877     |
| 35507 | 418 | 62 | 124  | ACGATGTTTGGCTCAACTGCATATTATCATGTGAGCGGAGTCAAATTTGGATCCAAG    | 34564 | A_95_P042886 BP130471     |
| 35509 | 418 | 64 | 498  | GCTGTGTGAGACATTATTTACAATTTGTCTGCTGAAATCAAATCTTTGCACTTTTGGC   | 34568 | A_95_P233784 FG640626     |
| 35510 | 418 | 65 | 1525 | GTTGTTCTTCAGTTGCTGCATTTTAGACATTCCAGTACTAGTTTATACTTTGATGGTGT  | 34570 | A_95_P257911 AB052822     |
| 35511 | 418 | 66 | 1031 | TCGCAATTGTCGTTCTTTATAAATCCAAGAATTTACCTCTGACTATGAAATACGAA     | 34572 | A_95_P193342 TA15649_4097 |
| 35513 | 418 | 68 | 353  | GGATGGAAAATTTGGAGAGGAAAATTAGGGTTCTAGGAAATGTTCTTCTTCTTCTT     | 34576 | A_95_P088638 BP530162     |
| 35514 | 418 | 69 | 1125 | CACTATTATGTAGAAGACTGATGAATGTGTTTGTCAATAATGCAGCAGTATACCACTC   | 34578 | A_95_P222922 TA22136_4097 |
| 35516 | 418 | 71 | 847  | AGCAGTAGTTTGCATCTTTTCTATTTTCTGCTCTGCGTGCTGTACCACTGTGGGA      | 34582 | A_95_P298508 FG160952     |
| 35517 | 418 | 72 | 508  | TATGGAGGATTTGCTGCAGCACTGAAAGACTTGAAAGTCTGGGTTATGAATGTAGTT    | 34584 | A_95_P034059 TA15455_4097 |
| 35519 | 418 | 74 | 853  | TTTGGTTGTATGTGTTCTTTTGTGCTCTTGAATGAAAGAGCAAGGCAAATCGCGTTA    | 34588 | A_95_P196737 DV157807     |
| 35524 | 418 | 79 | 401  | GTTTCGTTCTACATTTAACGAGTTGTTGTATAAGTTGGAGGGTGATTGTTGTCATCAT   | 34598 | A_95_P023566 CV019069     |

|       |     |    |      |                                                             |       |                           |
|-------|-----|----|------|-------------------------------------------------------------|-------|---------------------------|
| 35525 | 418 | 80 | 312  | CTGGGATAAGGTCAAACACTACAAAAGGATACATATATAACTACATACACTGTAGAAAG | 34600 | A_95_P089208 BP530399     |
| 35531 | 419 | 1  | 553  | TTGGGTGTAACCTGTGAATTTGGATGTGATTTGAGTCTAGAAGTTTGTGTTTGAGC    | 34611 | A_95_P073145 EH618900     |
| 35535 | 419 | 5  | 1035 | TGAAATCAAGGGTGTACCAGAGACGTCAAATGTAAAGAGAAATTACCAGTTTTGTTT   | 34619 | A_95_P217892 AY141105     |
| 35538 | 419 | 8  | 838  | TGCATCTATGTTTCTGGTTTGTAGTTTAAACCTGGTGACTTGCCTGTTTTTTGG      | 34625 | A_95_P217282 TA20899_4097 |
| 35539 | 419 | 9  | 563  | AAAGGAAAATGTTATTGAAAAGCTGGAAACAAGAATTGGGTTTCTGATTTCTGACCC   | 34627 | A_95_P121297 DW001304     |
| 35542 | 419 | 12 | 471  | GGTCTGCATATGATGTTTTAGGGTGGTAGAGTTGACTAATGTTATCATAGTTTTTC    | 34633 | A_95_P101838 CN824878     |
| 35544 | 419 | 14 | 836  | TAGGTAACCTTTAGAGTTAGCAGAAGACGAGGCTTTGTAATGAAGTGATGAACAA/    | 34637 | A_95_P149337 EB679186     |
| 35553 | 419 | 23 | 636  | AAGATGGGAAGGTTAACCACAGGGGTGCAGTATGAATCACAGTTTGGAAACACAAA    | 34654 | A_95_P129202 EB428919     |
| 35557 | 419 | 27 | 151  | TCGGGGGTATGGTACGTTGATGCTGCAGAATTAGAAGATAAAAATTATTGGAGAGAA   | 34662 | A_95_P031221 EB444185     |
| 35560 | 419 | 30 | 527  | TTGGAAATGCTCTGATATGCCTCACAAAAGAATAAGTTGTAATGATGCTGAAGAAAG   | 34668 | A_95_P063560 BP135813     |
| 35562 | 419 | 32 | 764  | GGACTGCTTCGCCCTGATTGAAATCTGTATATAATTTCCGGTATGCTGTAATTGG     | 34672 | A_95_P144797 EB677519     |
| 35563 | 419 | 33 | 764  | ACTTTCCCAAAGACGCTCTTGAGATAACTGCATGGACAGAAGATGGTCTTATAATG    | 34674 | A_95_P246002 EB426543     |
| 35568 | 419 | 38 | 356  | ATGATACAAGATGTTGACGATATGCTTGGTTATGACATCCCTGAACCTCTCAAGAATT  | 34684 | A_95_P269886 TA19780_4097 |
| 35573 | 419 | 43 | 244  | GCTCATGTACTCTGTGACACCCGAATTTAGGGGAATATTGTATTGAGTCGCGGTATI   | 34694 | A_95_P222272 TA21997_4097 |
| 35582 | 419 | 52 | 658  | CTTGATGAATAATCTAGGGCTGAAATTGCCATTGGTGTGTTTTGATATCGTATGTGC   | 34712 | A_95_P262896 FG638854     |
| 35586 | 419 | 56 | 775  | TTCTTTGAACTGATGTCGATGTCTGCAGCTGATATGTAATCCTCAAAGCCAGCCTCG   | 34720 | A_95_P284893 FG134869     |
| 35587 | 419 | 57 | 848  | ATACTGAAACAAACATCTAGTGTCCCACCCAGTCTGGACCAATTGTAGTCCACTGCA   | 34722 | A_95_P013311 TA16511_4097 |
| 35589 | 419 | 59 | 968  | TTGCTTGCCTTTCTGTCTTTGGGTGCAATGTAACTTAAGAAGCGTCTGGTTCTCTTC   | 34726 | A_95_P187617 TA14386_4097 |
| 35591 | 419 | 61 | 157  | ATGACATCTCTGTTGAGGATTACATCACAGCAACTGCTTCCAAGCCATCCGGTTTAC   | 34730 | A_95_P104967 CV017244     |
| 35593 | 419 | 63 | 454  | GGAGTATCCACCTTCTCTTCTGTTGCTTCATCTTGTGCCTTCTCCTATTCTGATTAG   | 34734 | A_95_P279898 AM818654     |
| 35595 | 419 | 65 | 203  | GCCTCAAGGTCCAACACATCCACCGAGGACAAAGCTTTCCATGTTTTCTCTGATTA/   | 34738 | A_95_P103562 CV016579     |
| 35596 | 419 | 66 | 642  | TTGGACAATATGTATCTTCAGCGGGCGAGTTTGGATAAGCTTATTATTATAACTTAG   | 34740 | A_95_P115592 DV157844     |
| 35597 | 419 | 67 | 1670 | CACAAGGAGCATATCCACTTGTAGTATCTTTTCCCTATGCGATTTTATAGTCTATTA   | 34742 | A_95_P283429 AY639146     |
| 35602 | 419 | 72 | 236  | CGCAGTTAACCAAGTTCTTTATCTCGGTGTCAATTCTCAAATACTGTAAGTTTGTTC   | 34752 | A_95_P164837 EH624205     |
| 35604 | 419 | 74 | 152  | CTTTTCACTGGGATTGTCATACTTAGTGTAGAAATTTAGGTAGGACCTTCAACTTTTC  | 34756 | A_95_P077395 FG623741     |
| 35607 | 419 | 77 | 1180 | GGAGACCGTTAATTCCTTGATAATTTGGTTTTCAGATTGGCATTGTATTTATTAGTA   | 34762 | A_95_P193112 TA15601_4097 |
| 35616 | 420 | 1  | 424  | GATTGCCTTTAGGTATTTGTGGTGCAGTCTAAACTTTTTTATAATGTGTGACTATATC  | 34612 | A_95_P189847 TA14875_4097 |
| 35617 | 420 | 2  | 428  | CTTTCAGTGAGGTTGCACTTTTACTACGGGCATCAGACTCTCTAATCCATGATCTGTG  | 34614 | A_95_P068220 FG154845     |
| 35625 | 420 | 10 | 790  | CTCAAGATCATCGGGCAGCAACGTAGTAAGTTGTTGGTTCATGATATAATGCCCAA    | 34630 | A_95_P292068 EB426307     |
| 35628 | 420 | 13 | 659  | AAGGAATCCTTAATTTCTGTTCTCTTATTCTCCACCAATAAAGTTCTGCTTTGGCAAC  | 34636 | A_95_P235729 BP136083     |
| 35632 | 420 | 17 | 885  | TCTTATGCATGAGAAAGTCTTTGTTGAGTATATGGAGATAACAACCTGAAAGTCTTTCC | 34644 | A_95_P250792 EB678124     |
| 35633 | 420 | 18 | 242  | ATTCTTAATATCATGAAACTGCCCCCAAAGCCACACTTTCTGGGGAGGCTTCTCTTC   | 34646 | A_95_P097648 BP534136     |
| 35640 | 420 | 25 | 473  | AGAGCTGCAGTGATTGAGTTGCTAGAAATTGATCTTTGGAAACATTAATTCAGTCA    | 34659 | A_95_P204242 TA18024_4097 |
| 35646 | 420 | 31 | 638  | TCATGACGAAGAAAAGTGAATCTCAACATGAAAAGCTTTCGAGCTTTCAGCTCTCT    | 34671 | A_95_P244497 FG640490     |

|       |     |    |      |                                                              |       |                           |
|-------|-----|----|------|--------------------------------------------------------------|-------|---------------------------|
| 35648 | 420 | 33 | 953  | GGTGTATGGTGTGTTTAAAACAGCCTTGGATTTAATACCATGTAATCAAGTCCTGACT   | 34675 | A_95_P181977 TA13107_4097 |
| 35652 | 420 | 37 | 401  | GCTCAATTCTTTGAATACTGGAGCTGTTGTATCTCATTGTTTATGAGAGTTTGTCT     | 34683 | A_95_P256774 AM817228     |
| 35653 | 420 | 38 | 551  | ATGCTTGAGGTTTTCCAGTCACATTGACATTGCTCAGCTTGAATAGTTTAAATTTACAC  | 34685 | A_95_P020716 DW005235     |
| 35654 | 420 | 39 | 179  | TCATGGGGCCTGCTGTGCTAGGTAGGCTTTGTTAAAAACATAAAGGTGTCCCTTGT/    | 34687 | A_95_P103222 CV016404     |
| 35655 | 420 | 40 | 282  | TTCCCTTGTGCTTGTATATAATCAAATTTTTTGGCATCCCTCAAGTGAAAAGAGTTGCC  | 34689 | A_95_P125542 EB102913     |
| 35659 | 420 | 44 | 738  | ATGCAGTCAAGAAAAATAAATTCCCTGAGGAATAGGGGAAGATTACTGAATGTGGI     | 34697 | A_95_P187472 EB449629     |
| 35660 | 420 | 45 | 405  | GAGCCCTTATATGGTGTTAACAGAATTTTGTAGGTAGGATGCCAAATTTGGTTTATTT   | 34699 | A_95_P000931 EH619918     |
| 35661 | 420 | 46 | 368  | CTTTGTGCATACCACAACACAAAGGGCATCAGCATTATCGTCTATGATTTGAGGCTGC   | 34701 | A_95_P061250 BP135214     |
| 35662 | 420 | 47 | 199  | TCTGCCGTTCAAGCCACAAAGAGCAATGTAGTGAAGTTGGCTTCTTATGGATAG/      | 34703 | A_95_P114477 CV021619     |
| 35663 | 420 | 48 | 376  | ACCAGAACTAGGTTCCAGGCTTGAATGAAAATTTTCTTATGAAGTTGAAGATGTT      | 34705 | A_95_P055131 BP133617     |
| 35664 | 420 | 49 | 563  | AGTCTGCTTGTCTTTCATATACGTGTGGTTTGTAAAGCAACTTTCAACCGTAATTTTTTC | 34707 | A_95_P001241 EH617784     |
| 35668 | 420 | 53 | 520  | GCGTGGATGGCAGACTTGTGAGAATCTTATGCCTATTAATGATGTTTTGAATTGAAA/   | 34715 | A_95_P202677 FG644444     |
| 35671 | 420 | 56 | 344  | GGCATGTTGCTCTTCATCTTGATGGTCATTAGATTTTGAAGCCCCTATATTGTTCCCTT  | 34721 | A_95_P132787 EB433498     |
| 35674 | 420 | 59 | 493  | CCAGCGGAAAAGAGATCAATCTCATGCAACAATTTATTCTGGATCTTTAAAATCAGAC   | 34727 | A_95_P291118 FS418200     |
| 35676 | 420 | 61 | 853  | TAAGAAGATGGTGATTATGGTAGCAGTGCACGCGACATTTTATTGCGATTATATTCTI   | 34731 | A_95_P247862 DV999990     |
| 35679 | 420 | 64 | 661  | CTCTTTCGCGTGTCCAATTTTGGTGCTTGGATATTTGTTCTTGTAGCTAATATTATAC   | 34737 | A_95_P024251 EB445181     |
| 35680 | 420 | 65 | 404  | GCGCACTGCACATTAGATCCCTGAACTAAGCTACTTATCAACACGGACAATCATTAGT   | 34739 | A_95_P092303 TA15396_4097 |
| 35682 | 420 | 67 | 163  | TCAAAGGTTTATGCCATAAAAGGTCCTCGGGTTATGCCAGGGAGGGTCATTAGGTTA    | 34743 | A_95_P159062 EH617013     |
| 35684 | 420 | 69 | 847  | TTTTCTGCTGATAGGAACTGCTGCTATGCACAAATCAAGACTTACATTATCCAAGCT    | 34747 | A_95_P272181 EB448123     |
| 35687 | 420 | 72 | 401  | TTAGGAAGCTTTCTAAGTTGCCATATCAAATGAGGAATATTTTCTTCTTGAGAAC      | 34753 | A_95_P148557 DW002260     |
| 35701 | 421 | 1  | 1008 | CCTGGTCAACCCACATGTCAATACTACATGAAAACCTGGCGATTGTAATTTGGATCAT   | 34780 | A_95_P018201 TA22281_4097 |
| 35703 | 421 | 3  | 732  | CAGGCATGCAGCTGCTGTTTCGGAGCTAAAACCTGTGAATTTGAGTTAGAAGATCTT    | 34784 | A_95_P162692 EH621679     |
| 35704 | 421 | 4  | 388  | TTTAAAACGCAAACATTTCAAGTGGAGACTCCAAAGGTTATGACATCACTAGGACCTC   | 34786 | A_95_P187812 TA14431_4097 |
| 35705 | 421 | 5  | 781  | GTTTGTGCTGCTTTCCTTCATATTGTGGCTATCCTTTACAATTACAAATGCTATCATT/  | 34788 | A_95_P181252 EB429556     |
| 35706 | 421 | 6  | 506  | TAACCATTGAGAATACAAGGTTATAGATCCATGATTGTCATCGAGCGAGTTTTTAGAC   | 34790 | A_95_P212602 FG634406     |
| 35710 | 421 | 10 | 1229 | GTGAACAGTACATCTGTTATCTGTATGTAATCACAACGTGGAGTGACCATGAACAGC    | 34798 | A_95_P220397 TA21598_4097 |
| 35713 | 421 | 13 | 428  | GTGAGTGTAGCCGACATGAGATTTACAGATTGGTTATTATGTATTCTTTTCTTCTTTT   | 34804 | A_95_P143342 EB446673     |
| 35719 | 421 | 19 | 999  | GGGGTTGGTTAATGTTGTAACCAATAAGTTTCGGCCTTTTTGTGTGGAGATGTTT/     | 34815 | A_95_P007261 TA14332_4097 |
| 35726 | 421 | 26 | 325  | AAGCATTGCTGCTTTTGTCCCAAACGCATGGTTGTTTGAACACTATTGAGGAAAATC    | 34828 | A_95_P114744 CV021739     |
| 35732 | 421 | 32 | 768  | ATTATAACCAGCGTGGTTTGTGCTTTTGGAGGGGCAAGGTATTTATCGACTGGGTG     | 34840 | A_95_P262366 EB678611     |
| 35733 | 421 | 33 | 894  | AAATGCGGAGTTTGTATATAAAAAAGGAGGCTGCATGGGCAATCTCAAATGCCACATC   | 34842 | A_95_P290063 DV161885     |
| 35737 | 421 | 37 | 5062 | GCAAAGTGCAGTTTAAAGTTGTGTTGTATATGAACTATGAAGTGTTAAAATTGTCAA/   | 34850 | A_95_P205872 AB180675     |
| 35738 | 421 | 38 | 781  | ATTCTTGCTGAGAGCACACTCAAAGAATTGTTCCAGTTTTGGCCAGAAAAGATGAGG    | 34852 | A_95_P292728 FG157460     |
| 35743 | 421 | 43 | 1640 | TACAGCACGTTTTTGCCTGTAAAATGCCGTTACCTGTTGATTTCTCTAATGAAAA/     | 34862 | A_95_P239749 AJ133453     |

|       |     |    |      |                                                              |       |                           |
|-------|-----|----|------|--------------------------------------------------------------|-------|---------------------------|
| 35748 | 421 | 48 | 1455 | GATCACGAAAGCATTCTGCTGTGTTTATATGTACATTTTATTGGCGTCAGTTCTATG    | 34872 | A_95_P200242 TA17167_4097 |
| 35757 | 421 | 57 | 1150 | AATTTTCAGAGCCTCGGGGAGCTTTCTATCTATTTATTGATTTAAGCTCTTATTATGGAC | 34888 | A_95_P147472 TA15308_4097 |
| 35759 | 421 | 59 | 855  | GTATGGCAGTATCAAATGCGAATAGCTGGTTGCTTTCAAGAACATCCTTTGCTTGTTT   | 34892 | A_95_P267116 DV158456     |
| 35763 | 421 | 63 | 789  | TGAGTTGGGATGGTTTTCTTGTCTATCACGTTTATTTTCGCATTTAAGATTATATTGC   | 34900 | A_95_P011206 DW000282     |
| 35766 | 421 | 66 | 547  | TTCCAGTCAGATACTGTAAAGCAGAGCCCCTATGACTGCGATGGAATATTCACAGGG    | 34906 | A_95_P044146 BP130798     |
| 35771 | 421 | 71 | 1042 | CCTTCAAGATCATTATATTGCGATAGGAAATTGTTATCGAGCTACTAGGAGTCTAGAT   | 34916 | A_95_P008486 TA13784_4097 |
| 35772 | 421 | 72 | 839  | TGCTGTCATGTGCTGAGCTTTAATATGGTGTGCTGATGCAATATATAGTTTTCTTTGA   | 34918 | A_95_P183847 TA13550_4097 |
| 35774 | 421 | 74 | 1754 | TAAAGAAATCAACATCATTGGTTATCGCGTTGGAGAAAATTTACCCTATTCCTGGG     | 34922 | A_95_P026211 TA14910_4097 |
| 35778 | 421 | 78 | 794  | TAACATTTCTTGATTTGGTTGCCGATTCGAGTCCCGTCCAAGGTTTCGTCACATTTT    | 34930 | A_95_P147002 EB451245     |
| 35779 | 421 | 79 | 474  | GATACTGATAGGGTCGATCATTAGCTTATAAGCTAGTTTTCGTAGCTTAATGCATG     | 34932 | A_95_P028861 BP530047     |
| 35780 | 421 | 80 | 322  | CTCTTTCCTTCTGTGAGTGAAGATTAATGTCTTATAACAATGTGGTTGTTGAAGATA    | 34934 | A_95_P134867 EB437747     |
| 35781 | 421 | 81 | 729  | TCATGGTTAATCTATTTGGTATGGTTGTGGATCTCTTTAGAGAACCTGCTCAAGAGA    | 34936 | A_95_P137102 EB440833     |
| 35784 | 421 | 84 | 693  | TAAGAAAATTAATGACAAAACTTTAATGCCCGGAAATGGTGGCGCTAGCCGGTC       | 34942 | A_95_P004536 FG164960     |
| 35786 | 422 | 1  | 557  | TTTCACTAGCCAGGCCCAAATGTTTATTACAAGCTTATTACAATGCAGAATGCTAAA    | 34781 | A_95_P062550 BP135544     |
| 35791 | 422 | 6  | 1149 | GGAATTCCTCTTTAGTTGGATGTAATCACTATTTGGGCTTCTCTTAATTTCAATAT     | 34791 | A_95_P181007 TA12876_4097 |
| 35795 | 422 | 10 | 536  | GTGAACCAACTTTAATTGCTGTATGTTGCAGCAGCAGCTATTAATATAAATTGGTC     | 34799 | A_95_P211432 TA19609_4097 |
| 35808 | 422 | 23 | 403  | CAAATTCATCATTGTACAGAACCAACATTTTCTCAATGGTGAGAATTCGATTAATA     | 34823 | A_95_P026601 TA21385_4097 |
| 35810 | 422 | 25 | 755  | GAGTATTGTCTCAGATCGTTACCGAATCAATCAAGTTGTCACTCATTAATAACTAG     | 34827 | A_95_P013761 DV157504     |
| 35812 | 422 | 27 | 656  | GGAGCAAGTCAAAATCAGTGAAGTGCAGGATTATGTGGCTTTTCAATTTTCTCATA     | 34831 | A_95_P183452 TA13460_4097 |
| 35820 | 422 | 35 | 596  | GGTTGAGTTGCCGTTGATCCACAAAAAATCTTGATGAATCTATGATTCACAAAATGA    | 34847 | A_95_P032131 DW005237     |
| 35823 | 422 | 38 | 157  | TTTCTTATTGTTGATATTGTTGCTTCTTCTTCTGCTTCTTCTGCTTCTTCTGCTTCT    | 34853 | A_95_P128902 FG134537     |
| 35829 | 422 | 44 | 624  | TCTTTATGTCGTTCCCTTGAATTCTACTCCTCAAGCTTATCCGGAGCCTGATGCAGCA   | 34865 | A_95_P233479 FG641901     |
| 35830 | 422 | 45 | 743  | TGTACGTTTTGTCTCTGTTGTAACCTCTCTCAAGAGCGATTGAGAATCTCGAGAACTT   | 34867 | A_95_P222792 TA22110_4097 |
| 35840 | 422 | 55 | 854  | ATCATGTCGTGAGACTTGAGAAAATTGCAGTTGTGAATCTACTTCAACACAGGATCA    | 34886 | A_95_P278618 FG155234     |
| 35845 | 422 | 60 | 225  | GGGTCGTTCCAACGATGTACCTACCAAATGTCTATTTTCTTCTCTGATTTGTCTC      | 34895 | A_95_P208467 TA18975_4097 |
| 35848 | 422 | 63 | 565  | AGGCTCTTTGCTCCATGATTGCTCTGATCCCAAATAGATTACACCGTTCAAGATTT     | 34901 | A_95_P004881 EH665149     |
| 35851 | 422 | 66 | 786  | GCAGGGAGTAAAGTTACTTTGATTCCGATATTGATTGGAAAAGACCAAGTAAAATCC    | 34907 | A_95_P122277 DW002296     |
| 35855 | 422 | 70 | 515  | TATGACTGAGGCATAGTTGTTGTTGTTGCTGTTGTATCTTGAAGTTTCAAATGACCAT   | 34915 | A_95_P278308 FG638668     |
| 35859 | 422 | 74 | 455  | CAATCAGCACTAGTGTGATCCTGCTTCTGCACTTATAGCTTCTACTAAGACTATGT/    | 34923 | A_95_P029981 BP129737     |
| 35861 | 422 | 76 | 692  | ACTGGTGTGCAACAATGTTCACTACTTTTCTCAATGAGGCTAGTTTCAAGTTGTTGCGG  | 34927 | A_95_P177902 TA12100_4097 |
| 35863 | 422 | 78 | 739  | GGGGTATGGGGAGTAGGAAATAATGTAATCTAAGAAGTTGTGCAAAATGAGGTGA      | 34931 | A_95_P135542 EB439036     |
| 35864 | 422 | 79 | 313  | TTATGGAGCATCAAGTGAGGACAATTGCTCGTAACTTGCCTGCACATCCAACAATG/    | 34933 | A_95_P111397 CV020187     |
| 35867 | 422 | 82 | 1038 | GATGAGCTGCTCTGATTTGCCTGTACACCAATGTAAATTGGTCATCATATAAAGAGC    | 34939 | A_95_P248992 Y09109       |
| 35868 | 422 | 83 | 758  | ACTTGATGCTTTGATTCCGAGCACATCAAAGAAAGACGACAAATCAAAGGGGAAGA     | 34941 | A_95_P116262 DV158884     |

|       |     |    |      |                                                              |       |                           |
|-------|-----|----|------|--------------------------------------------------------------|-------|---------------------------|
| 35881 | 423 | 11 | 570  | TCATCAACTCTTCTTTCTTGGTATGTACGATGGTACAATGTGGCATCACCATTCGAAG   | 34965 | A_95_P117407 DV160328     |
| 35884 | 423 | 14 | 457  | GGGGATTAAGTGCAGAAAGAGCTGGATTAATGAACTATTGAACGGTATTTTTGC       | 34971 | A_95_P130167 TA17452_4097 |
| 35886 | 423 | 16 | 857  | CCTCGGATAATTTAATCTTTGCCTCAATATATTCTGCCTGGTTGATTTTGTGGTGAT    | 34975 | A_95_P011001 TA15296_4097 |
| 35887 | 423 | 17 | 698  | GACGTTTCGAGACCCGATTTCTCCTTCTATCTCCACTTATTATTCCGCATTTTAGACAT/ | 34977 | A_95_P223282 EB679603     |
| 35889 | 423 | 19 | 935  | CCAGAGGGGAACGTACTTGTGGTATGGTCAAAGATATACTGTCGTTGCTCTTCTTCTC   | 34981 | A_95_P020316 TC56111      |
| 35892 | 423 | 22 | 969  | GTAGATAGATGTATGTGAGCTTGGTAAATCTTGACTTGAATGTGGACTAAATGTTA/    | 34987 | A_95_P012811 TA16106_4097 |
| 35894 | 423 | 24 | 498  | TATAGCATTTGGCCTGTGGTACTTATTCCTTATAAATTTACCACCTTGGCTATGCATGAA | 34991 | A_95_P055881 BP133816     |
| 35900 | 423 | 30 | 479  | CTGCTGCAGAGATGAACTAACTGATTAGCAGTAACAGTTTGCTGTGTTTGTATTTGTA   | 35003 | A_95_P021866 BP526432     |
| 35907 | 423 | 37 | 579  | TTGCAAGTCTGGTTAGCTTTAGCTTTTGCCCCATATATACCCTCATTATGAAGTAAGT   | 35017 | A_95_P031476 BP134683     |
| 35909 | 423 | 39 | 798  | CTCAGTTTAGTAATGGTGGTGTATTATCGTGGAGTATATCACTTATGTCAACTTCTCT/  | 35021 | A_95_P116072 DV158614     |
| 35912 | 423 | 42 | 88   | TTATCAGTTCTGTCAATGGCGAAAGCCGGTCTCGTAATTGTGCCTTCTTCTTCTCTCT   | 35027 | A_95_P206377 EG649505     |
| 35913 | 423 | 43 | 692  | CGCATATATGCGCTATTCCGTCTATTGTAGTTGTTGGAATTTTCGTCAAATAAAAGC/   | 35029 | A_95_P254479 EB447363     |
| 35914 | 423 | 44 | 275  | TGCAACCATCATCAGCTATCTACAACCCTTAAAGCAATGGAAGTGTGAAATTCCATA    | 35031 | A_95_P026611 BP535378     |
| 35919 | 423 | 49 | 355  | TCAAATGTATTCATCGTTCAGTTTCTGATGCCTTGTTCACCTGTAACGAGTCCCCTCTG  | 35041 | A_95_P155952 EG650341     |
| 35920 | 423 | 50 | 862  | GTGTCCCAATTTTCTCATCCCTTTAGTTATAGGGAAAATTGAATTTGTTCTGTTGTACG  | 35043 | A_95_P008941 EB683385     |
| 35924 | 423 | 54 | 726  | ATGTGCACTTATTTCTTTGCCGTTATGCTTGTGTACTGTAATTTAGATGCGTTGCTAC   | 35051 | A_95_P148162 FG645393     |
| 35926 | 423 | 56 | 933  | GTGATGATTCCCTTGAATTTGCATCTACTATGTGTTGTTAAAATGTAACCGAACATAC   | 35055 | A_95_P184887 U64924       |
| 35930 | 423 | 60 | 598  | TGTTTGAGATCGATGTTCTGAGTTTCTGATACAAGTACATGCTAGCTGCTATGTTTA    | 35063 | A_95_P181447 TA12982_4097 |
| 35932 | 423 | 62 | 596  | GAGTCAAACGGCTATGCAAGTGTGAATGCATTCCATTATTTCTATATCGTTGGAGTA    | 35067 | A_95_P027621 TA13998_4097 |
| 35933 | 423 | 63 | 248  | TATTTTGTTTAATCAAGAAGTGAAAAGGTTGTGGCTGGATAGGCCAGCTGGATAAAA    | 35069 | A_95_P235824 BP135456     |
| 35936 | 423 | 66 | 796  | GATGATGGTCTAAGCTTTATTGTTTCATCTGTAGTTTTAGCATAGATGGTTGTCTTTTG  | 35075 | A_95_P020446 DV162700     |
| 35940 | 423 | 70 | 672  | GCAGTCGAAAGAAGTGGTTCAATTGGGCATAAACTTCTTTATTGGATTTTATAGAGA/   | 35083 | A_95_P001266 FG176960     |
| 35955 | 423 | 85 | 201  | GACAATCGGTCCATGAAGTTATAGAAGTTCGTGCTTGTTCAGTACTTTCTTTGTTTTG   | 35113 | A_95_P219227 TA21352_4097 |
| 35956 | 424 | 1  | 416  | TTACGCTTACTTTCGAGGGTTGGCTCTTTATGTTTGGTTAATAAGGCGATAATAAGA    | 34947 | A_95_P143027 EB446412     |
| 35972 | 424 | 17 | 691  | AGGTAAGAGCAAGAGACGTGCAATCATCGTATAAGAAGAGGGAGGAACTCTTTA       | 34978 | A_95_P219027 DW001900     |
| 35975 | 424 | 20 | 1257 | GTGGAAGTGTCTCTCTGCAGGATTTCTTTTGAGGGGTAAATAAATAACTAATCAACT    | 34984 | A_95_P013626 TA16452_4097 |
| 35977 | 424 | 22 | 308  | GCTGGCACTGTATTTTGTATTTGGGATCTTTATCTTGGTTGTTTTGAAGTTTTGGCAG/  | 34988 | A_95_P006097 FG623522     |
| 35978 | 424 | 23 | 812  | ATGGTCCAGAAGAAGTATCCCCAGAATCCATCCACAATTCACGGATTGTCCACTGA/    | 34990 | A_95_P012316 EB448393     |
| 35981 | 424 | 26 | 375  | GGCCTTGAGTTTCAAGAGCTATCATCATCTGGCCTACTATTTCAACATCCTCTTTTGG   | 34996 | A_95_P098308 BP534409     |
| 35993 | 424 | 38 | 550  | CCAAGATCATGTAACATTGGTGCAGTGGACCGAAAGCTTGAAGTTGGTCATTGTTT     | 35020 | A_95_P036238 BP128679     |
| 35994 | 424 | 39 | 443  | GAATCCTTGTCTATGTGTTTCTTGGTCTTCTGTTGATGCCATGAGTATAGGATTTCTT   | 35022 | A_95_P084585 BP529058     |
| 35995 | 424 | 40 | 419  | CTGGTGAGAAGTCTGCGTTTCTGAATTATTTTAGAAGCAGCGTCTGTAATAATAT      | 35024 | A_95_P028491 TA12914_4097 |
| 35996 | 424 | 41 | 757  | CTAGGAGCCGACTGCATAAATTATCCTTCACAATGTGCTTAAGAATATAAAAAGGTA/   | 35026 | A_95_P146517 EB450574     |
| 36002 | 424 | 47 | 202  | AGAAGCTGCTGCTTTGAGTGCTAAGTATTGCTGACACTTAAATGGGGCAAGCTGCTT    | 35038 | A_95_P032296 AB001548     |



|       |     |    |      |                                                               |       |                           |
|-------|-----|----|------|---------------------------------------------------------------|-------|---------------------------|
| 36011 | 424 | 56 | 778  | ACAATTTTGTGCTATATTGCCCGGCTGTCACAACAGAAGTTCTGAGTCCATGGGAGAG    | 35056 | A_95_P256149 FG172775     |
| 36019 | 424 | 64 | 528  | GGACAATGTAGCTTTGGTTTCTTACTAGTCAGGTTACCTTTAGCTAATATTGGTACCTC   | 35072 | A_95_P301648 FG635137     |
| 36021 | 424 | 66 | 459  | CTCTCAATCCACTAGGTCGAGAGTTCAAGGCTGGTAAGAGAAGGAGAAAGAGAAAG      | 35076 | A_95_P059640 BP134791     |
| 36024 | 424 | 69 | 313  | TCTCCTTCTGACCTTGGCTCTTGAATATCAACACATTTGGTTCCACAACACTACTGAGATT | 35082 | A_95_P066435 AM791244     |
| 36025 | 424 | 70 | 911  | GCCTCCTTTATGACTTACATAGCCGTGATTTAAGCAGTAAATCACTAAATCTTGATTG/   | 35084 | A_95_P015756 TA14117_4097 |
| 36029 | 424 | 74 | 2459 | GGAGGTTGGAGCTTGAAAACATGTTTCGTTTCATTTTCTTTTGGGTAGAACTAATCAA/   | 35092 | A_95_P032651 AF022727     |
| 36031 | 424 | 76 | 1603 | GCACGATCGATGAGGTGGGGTACTTCGAGTTGTTGTCAAGATATACTTCAAAGGA/      | 35096 | A_95_P247817 X06134       |
| 36046 | 425 | 6  | 551  | ATATAGCCAAGCATATGAGGCAACACTTACTGTAGCTTCGTGCCTCCTTAATTGTACTI   | 35125 | A_95_P233719 BP134784     |
| 36048 | 425 | 8  | 731  | GTGTGCTTTCTATGGATTGATTGAAGCATCAAGACATATACTAAGATGGTTAGCAA/     | 35129 | A_95_P107867 TA11779_4097 |
| 36051 | 425 | 11 | 558  | GGAGGCTTCTACATTGTTTCATGTTTATCATCTTAATCGAAGCTTAGCGAGTTAACTTC   | 35135 | A_95_P026291 TA19839_4097 |
| 36052 | 425 | 12 | 104  | TTCTGGTAATTGTCAAATGCCTATCGGTAATGGGGAGGATGTAATCCTGTTTATCTC     | 35137 | A_95_P117627 DV160551     |
| 36054 | 425 | 14 | 1075 | ATTTTGAGTGCAACTACCACAGATACAGGGAAGTGGCATTAGAGTGGCTTATTATTA`    | 35141 | A_95_P198112 TA16709_4097 |
| 36055 | 425 | 15 | 230  | TTTACTTTGCTCACCTTCGCAGGTCAGATAATTTAGTTTTTTCACATCAGTTCCTTTTGC  | 35143 | A_95_P154627 EG649678     |
| 36059 | 425 | 19 | 3048 | GAGTAGTGACGAGTTATACTTGTAAAGGCATTTTGAAGTATAACGAAGTCCAAACAAAA`  | 35151 | A_95_P009241 AB095098     |
| 36065 | 425 | 25 | 709  | CTGCTGTTGCTTAGGTAATCCCGATGTTAAACCAACCGAAGAGATTAAGAAAGAAAGA    | 35162 | A_95_P270871 EB450283     |
| 36067 | 425 | 27 | 611  | CAAAATCAGCGCGGACTTGATGCATTGCCTGGAATGACTCTTTTATCCGCATGTTTGC    | 35166 | A_95_P157172 EH615204     |
| 36069 | 425 | 29 | 190  | TGTATTGATTGCCAGTAACTGTACTGTCATTGTGTAATGACATATTCTCGCTAAGGC     | 35170 | A_95_P109872 CV019482     |
| 36074 | 425 | 34 | 1725 | GAAAAGAGACTTGCTGAAATGGGGATTGAATTGGAAGATGATGGACCGGTTTGTCA      | 35180 | A_95_P007426 AB102808     |
| 36077 | 425 | 37 | 704  | GTGTTTAACTGTGCGTCTGCGCGCAGAGTTAAAAAGAAAGAAAGAAAGACCATG        | 35186 | A_95_P215542 TA20509_4097 |
| 36079 | 425 | 39 | 215  | TGATCGCATGTTGCAGTAACATTTAGTTTTCCAAACACACGCCATTGAGGAATCTTCC    | 35190 | A_95_P112852 CV020882     |
| 36080 | 425 | 40 | 2222 | CGTCAGTATGATGCTTCAAGTGAAGATATGGTTGTAAGTGTAAACCAACAAAAGAAA     | 35192 | A_95_P239839 AJ627182     |
| 36086 | 425 | 46 | 1344 | AAGCTTAAATGTATCCGAGAATGCTTTTCTAAGAGTAATTCGAAGATGTATTGACT      | 35204 | A_95_P208957 TA19085_4097 |
| 36088 | 425 | 48 | 75   | TACTTGCTGGGTCAGCTGATTTCAAGACAGAGCTGAGCCAGTCTGATATGTTTGATC/    | 35208 | A_95_P138607 TA13824_4097 |
| 36092 | 425 | 52 | 414  | CGACTGAAATTAATATTATCATGTATCATACTTCAGTGGATTGGATTTTGGGCATGC     | 35216 | A_95_P132217 EB432660     |
| 36094 | 425 | 54 | 873  | GCTGACCCTGCAGATTTGTTGGATGCTCCAGAAAAGATGGATACAGCTTCTTATCATC    | 35220 | A_95_P010761 TA14812_4097 |
| 36098 | 425 | 58 | 785  | GTAGGTTCCAATGTTGTAATAGACAGGTTTACTTGCTAAAGCTCCATTGACAATT       | 35228 | A_95_P219022 TA21308_4097 |
| 36099 | 425 | 59 | 1573 | CTATTGCCTTATATGTCGAAAAGTGTGCTGCAAAATCAATCTCTTGCCAATACAATTTI   | 35230 | A_95_P224137 AY433959     |
| 36104 | 425 | 64 | 836  | CGATGTTCTAATAATGTAAGATACACGGAGATATTTCTTTTCATAGCAACTCTGATCC`   | 35240 | A_95_P143632 TA16928_4097 |
| 36106 | 425 | 66 | 477  | ACCGTTAAGAATTGGGGTTTGATTGTTCTACTTCTATCTAATGTATTTCTCTACTTCC    | 35244 | A_95_P018181 FG641597     |
| 36108 | 425 | 68 | 499  | ATGAGCTTTCTTATTATACAAACGACCAGATAGCTTCTAAGCTACTAAATGGTGG       | 35248 | A_95_P111372 EB437086     |
| 36110 | 425 | 70 | 546  | TTAACGATTGTAATCAACTGAGGTCCTGAAAGCAATAAACTCCTTATCTCAGTA/       | 35252 | A_95_P180762 TA12821_4097 |
| 36111 | 425 | 71 | 276  | TAAGGTAAGGTTTAGCCCGTTTGTGTTATATGGGTAACAATACCGGTGCTATTGTC      | 35254 | A_95_P123662 DW003532     |
| 36113 | 425 | 73 | 143  | CCATTCCCTATCTTGGAATTTGTTGGAATCAGATGTATTTGGTGAATTTGGTTGATTT/   | 35258 | A_95_P129247 EB428957     |
| 36116 | 425 | 76 | 121  | GGGACCCCTATTGTATCGACTTCTGCATTCCCTATGGTCAAATGATGAAATTTGTTGC`   | 35264 | A_95_P100548 BP535422     |

|       |     |    |      |                                                              |       |                           |
|-------|-----|----|------|--------------------------------------------------------------|-------|---------------------------|
| 36122 | 425 | 82 | 663  | GCCTACCAAATGAGGTAGTGATCAATTCAAAAATTTGGGGAGCTAATTAGTTTTTCA/   | 35274 | A_95_P288388 FG186056     |
| 36126 | 426 | 1  | 1537 | GCTTTGGAAGACTACATGCTATGCTTATACAAGTATTATGTTGCTTGTCTGTTTGATA(  | 35116 | A_95_P006356 TA15030_4097 |
| 36137 | 426 | 12 | 273  | CACTGTTAGTGTTGAAAGACACCTTACTCCAAGTATTACCTGATTATGAATCTTATI    | 35138 | A_95_P216987 TA20828_4097 |
| 36138 | 426 | 13 | 810  | CATGCATTGGAATGGTCAGAACCAAAGGCAGCAGCTGGGGAAAAACAATTTGCTACA,   | 35140 | A_95_P291993 EB425909     |
| 36147 | 426 | 22 | 1534 | CAGCTTGTAATTCTCTTGATGCCATAAGAATGCAAGGATTTGCTAATTGTGATTTTCI   | 35157 | A_95_P007446 TA13801_4097 |
| 36148 | 426 | 23 | 156  | CAACTGAGTCTTGAGATAGTGACGAATGTCGGACTTATATTTCAATTACAAGTGTTA/   | 35159 | A_95_P004556 EH620851     |
| 36152 | 426 | 27 | 821  | TCCATTGCATACCTTCCCTACGGAACTGGATATACGTGGTTGGTTATTGGAGTACTT    | 35167 | A_95_P269981 EB428526     |
| 36153 | 426 | 28 | 992  | CTACTTCAAGATAAAAATGACGTTCCGTTTGGTACAAGAATTGCTGATTAAAGTTGAAC  | 35169 | A_95_P021161 TA20789_4097 |
| 36156 | 426 | 31 | 617  | TCTTCATGTTGTGCTACTCGACCATGAGACATTGTACATATTATCTCTGTATCCAAAT   | 35175 | A_95_P159142 FG163977     |
| 36158 | 426 | 33 | 1232 | AGAACCGGCTAAACTTTCTTTCCATGTTTGCCTTAGTTTTGCTTTGGATTCTAATG(    | 35179 | A_95_P013636 TA14494_4097 |
| 36160 | 426 | 35 | 807  | TCCATCAGACATGGCCAAGTCTCAAATATGTGCTGGATGCTGACTATTGTGATATTG/   | 35183 | A_95_P281708 TC50226      |
| 36161 | 426 | 36 | 1375 | ACTCTTATGTTTTGAACGGCTTAAAGTATGATTTCCATGTTATATTATGCTATTCCGCTG | 35185 | A_95_P026456 TA14848_4097 |
| 36163 | 426 | 38 | 440  | ATTTTAATATAGGTATTTGAAGCTATTCAGTTGAGAGTTTCCGGCGATGGCGTCAGA/   | 35189 | A_95_P190042 FG144865     |
| 36167 | 426 | 42 | 378  | GTGTCGTAGAGAAGCACGAGATGAATGGCATAGGATGTTGAATGAGGATAGAAGTTC    | 35197 | A_95_P114182 CV021486     |
| 36171 | 426 | 46 | 1369 | GGGTAAGGAGTTGATTGTTGGGTCATCTTATTCTTATTTCTTATTTGACTTTCAAG     | 35205 | A_95_P110472 TA12248_4097 |
| 36177 | 426 | 52 | 809  | GAAAACCTCTACGAAAGAAATGTTAGCCACCTCCACTATCTGACAAGACCAGAGAG     | 35217 | A_95_P191697 TA15294_4097 |
| 36178 | 426 | 53 | 699  | ATAAATGCTCAAGCCTTATCTGCATACCTGCAGTTTCTGATCTAGGGGTGTTCT       | 35219 | A_95_P296038 EB449538     |
| 36183 | 426 | 58 | 360  | GAGGCACCATTTACTCTACCCATGTCATTCTATACTTTCACTAGTTTCAACACATCGTT  | 35229 | A_95_P078150 BP527440     |
| 36184 | 426 | 59 | 443  | GTGGCTTTGTGTTGTCAGCATGGATCGAAAAGGCATGATGGCGAATGTTACTTCAGC    | 35231 | A_95_P155612 EG650166     |
| 36186 | 426 | 61 | 940  | TTTGAGGATGGCTGCTATGTTCTGGATAAGATATTTGGAATGTAGAAAATGGAGA/     | 35235 | A_95_P223127 TA22184_4097 |
| 36187 | 426 | 62 | 404  | CTTTGCTACGTTATAATTCTGTGTGATGGTAATAAGAAGCTTTCTGAGCTGCTACTTG(  | 35237 | A_95_P018061 TA13981_4097 |
| 36189 | 426 | 64 | 1049 | TATATAGAGGGATTCCCTCTTAAACACTTTCTGCAATATGCTGGCTTACAACTTTTGCTC | 35241 | A_95_P197242 TA16519_4097 |
| 36191 | 426 | 66 | 430  | CCTTTCCCTCTACTTTTGTGTTGATTTGAGTATGATGAGAGTTTGGGATACAAAATAG.  | 35245 | A_95_P143997 EB447197     |
| 36193 | 426 | 68 | 285  | AGTGAGTTTTTATTCGGAAGGTTTCGACGATGCAGCTCAAGTTAATACCTGGAAAATC/  | 35249 | A_95_P167971 EB439337     |
| 36195 | 426 | 70 | 759  | TTTATTGCTACAAACCGTGATGCTGTTACCCATCTTACAGATGCTCAGGAATGGGCAG   | 35253 | A_95_P126552 DV999727     |
| 36199 | 426 | 74 | 713  | CCAAAGCCCCGTTGTTTCGAGCTTTCGTATGTTTGTTCAGTTATGGCTTCTGCGTTTTG  | 35261 | A_95_P222102 EB439875     |
| 36205 | 426 | 80 | 877  | TTACCAATATATGTCGGGATTTACTGCCCGGTGGAAAATATTATTTATCTGGTCAATC   | 35271 | A_95_P201057 EB427795     |
| 36206 | 426 | 81 | 527  | TGTTCTCAACGATTCCCTTTTGTAACCGGTTCCCTAGCTCCATTTGAGTTCAAATTTGGC | 35273 | A_95_P108367 BP530524     |
| 36207 | 426 | 82 | 401  | TACCTATAGTTCAGATATAGCCAGTTATGGTGTATTTTGTGACTTTTCCAGCCATTG    | 35275 | A_95_P024986 EB433044     |
| 36214 | 427 | 4  | 694  | TGGCTTGTGTTGCTAAAGGGATATAATTTGAACTATGTCTAAATAAGATAGCACCCCT   | 35288 | A_95_P121612 DW001701     |
| 36219 | 427 | 9  | 903  | TCTGACTTGCAATGCATCATTGGCGATAACTGTGTTTTGAGGATGGCTGCTATGTT(    | 35298 | A_95_P269026 EB438854     |
| 36221 | 427 | 11 | 788  | TATATATGAATTGCTATTGCCAGGTTGGGTGAGACTGCAATGACGAGTGGGCTGAC     | 35302 | A_95_P294713 FG166045     |
| 36225 | 427 | 15 | 237  | TAAATTTGACTGTATGAATGATGACACAGTTGATGAGACCTCGATGATTGCTATAA/    | 35310 | A_95_P158987 EH616877     |
| 36234 | 427 | 24 | 750  | TAAAGGTAATATTTGCCACAAGGGATATTTGTATAAACTATGTTCAATTCGTTGCCC    | 35327 | A_95_P028616 TA16788_4097 |

|       |     |    |      |                                                              |       |                           |
|-------|-----|----|------|--------------------------------------------------------------|-------|---------------------------|
| 36237 | 427 | 27 | 860  | TAGCCTGGAATTTAGGCACACATAACAACCTTAATTCTTTTTACTTTCTTCAGCGAGTT  | 35333 | A_95_P020221 TA17157_4097 |
| 36241 | 427 | 31 | 239  | AGTCGACCTTGAATCTCGCTTGGGAAAGACTCAGGTTAGCAACTCTATTATCCTCTCC   | 35341 | A_95_P079810 BP527852     |
| 36244 | 427 | 34 | 772  | CCTATAAAGATAGCACCCCTTATCACGCAGTTATTGAGGGACAATCTCACTCTCTGGAC  | 35347 | A_95_P290508 DV999880     |
| 36247 | 427 | 37 | 1210 | TAAGCATAGTATCAGTAGGTCATTATTCCGATTTTCCCCTCATTGGGGAAGGGAGGA    | 35352 | A_95_P219412 TA21389_4097 |
| 36250 | 427 | 40 | 577  | TATATTTAGAATTTCTTGTTGAGTTGGTATTTTCGAGATCTTCTGGATTTTGGCTTCGGT | 35358 | A_95_P253964 TC53391      |
| 36252 | 427 | 42 | 432  | TTTCTGTGAATTATCGCCTTGCCCCAGAAACATGACCTGCCACACTTTTATCAAGACT   | 35362 | A_95_P158797 TA13475_4097 |
| 36253 | 427 | 43 | 333  | CCTCGACAAGTTTTGTATTTAAGTGGTATGCAGAGTCTAATTCTGGTAATGACAAGT    | 35364 | A_95_P132012 EB432445     |
| 36258 | 427 | 48 | 703  | TTCAACAGAAGGAAGAGAAATGGCTATGGTCTTGGTAGGAGAAAGATGAATGTCCG     | 35374 | A_95_P127762 EB427332     |
| 36266 | 427 | 56 | 832  | GTAACCTAAAACGGAAGGAAGTGGATTGAGGCAATAAGTGATTCTGGAGAACAAATT    | 35390 | A_95_P010351 TC41609      |
| 36271 | 427 | 61 | 242  | CACGGGTGCATGATTCAGTCTGTGACATTACTTAATTACTTAAGTTGCTTGAACATTT   | 35400 | A_95_P027411 EB450337     |
| 36282 | 427 | 72 | 835  | GATGGGCAGCATTTTGAGATTTAAGCGTATGTTAATATGGCTGAGATAGTGAGAT      | 35422 | A_95_P224352 EB450269     |
| 36284 | 427 | 74 | 835  | ATGTACACTTATTATTACAAGGCCTCCCCCTGGAAACAGAAAATTGAGCCAAACCTGC   | 35426 | A_95_P230274 DV158655     |
| 36287 | 427 | 77 | 397  | TGGGTCTTGGCAAAACTATTTTGTATATGCCGAGTGGTACTACTCTTGGCTATTTATA   | 35431 | A_95_P065195 BP136266     |
| 36297 | 428 | 2  | 786  | ATACCAGATTGGATTGTTATGTAAGAGGGAAGGTTTAACTTATGCTGCACCTTTCTGT   | 35285 | A_95_P180442 TA12746_4097 |
| 36304 | 428 | 9  | 842  | AAATGATGAGGACAAGCTTCTAAAAGCTGTGGCAAAGCAACCCGTGAGTGTGGGA      | 35299 | A_95_P220062 TA21528_4097 |
| 36307 | 428 | 12 | 254  | AATTTGTCTGAGGAACATAGGTTTTTGTAGTCTACCATCTCTCTCAGTATAGCAAC     | 35305 | A_95_P034259 AJ718327     |
| 36308 | 428 | 13 | 829  | TTCCAGCATTCTACAAGACATGAAACTGCAAGGACATGATGTCGAAAGGTGCAAGC     | 35307 | A_95_P125802 EB424899     |
| 36311 | 428 | 16 | 755  | TATTTTTATACTAGACATGGCTTGGTTCTACTGGGAAATATTGAACCCAGTTTTCT     | 35313 | A_95_P161112 EH619844     |
| 36313 | 428 | 18 | 507  | CTGACAGTACCAAAAAATATGAAGCCGCAATTTATGTGTATTATCAGCTTGACAAC     | 35316 | A_95_P127307 EB426825     |
| 36315 | 428 | 20 | 641  | GGTGAGACTTGGATTGTAAGTTCGTTAGATAGGATTATGCAATTGTTTGTGATCATC    | 35320 | A_95_P271066 EB439373     |
| 36316 | 428 | 21 | 494  | GTAGTAAATCTGTAGCACAAATAACAGGGTGAATTGCCTACGAGTATGGTTACAGT     | 35322 | A_95_P263196 AM819871     |
| 36320 | 428 | 25 | 91   | ATGATAACAACCTCATAAAATCTAAAGCTTGCTTCCAGTTCTAATAACGTGTCTCCCTC  | 35330 | A_95_P091138 BP531223     |
| 36327 | 428 | 32 | 107  | CTGATACATTGCAACAGACCAGTTATTTGTGCTTATCTAGAGGTTTGTTCATTTGAT    | 35344 | A_95_P178632 TA12300_4097 |
| 36328 | 428 | 33 | 743  | TCATCGTTTGTCTTATATTTGAAACTACTAACCATCTCTTGGAAATATCAGGTGGCTT   | 35346 | A_95_P223847 AJ250174     |
| 36347 | 428 | 52 | 466  | AAGCTTAGGACCTAGATAAGTCTTCATCTTTGATGGGTGATAATGTGGAGGTTGCAA    | 35383 | A_95_P154017 EB684179     |
| 36349 | 428 | 54 | 751  | ATATAACCCTCGAATTGCTCCATCAGTCTATGAAAGCTGGGCAGATCTCTGGTGAATC   | 35387 | A_95_P297873 FG132806     |
| 36352 | 428 | 57 | 808  | AAAGAGAGAACTTGTCTGACTCTGAATCTCTCTCGTGCACGTTGCTTTTTCTT        | 35393 | A_95_P126447 EB425766     |
| 36353 | 428 | 58 | 288  | CTTGTGCAAAACTATCTATCAGTGTATGGATTACAGGATTATCAAATGGAGTAAAG     | 35395 | A_95_P026276 AM799412     |
| 36355 | 428 | 60 | 475  | GTTGTACTCACTTGAGGTGATTTTCGAGCAGAAATAATTAAGAACTCTTATTCAGGTCC  | 35399 | A_95_P299813 FG633507     |
| 36358 | 428 | 63 | 366  | TCAGGGTTTATGTTAGCGTGTGAATACAAATTAAGGGATGAATGAGAACATCATTTT    | 35405 | A_95_P133842 EB435538     |
| 36360 | 428 | 65 | 326  | CTCGTATGTCATTACAACAGACTTTGGTTTGAATAGTCAGAGCAATAATCTTCTGGC    | 35409 | A_95_P075720 TA19140_4097 |
| 36364 | 428 | 69 | 829  | CACCGTCATTGGTTCGGATGGAAACAATATTCAGCCTCGATTCTAATACATTGTTAG    | 35417 | A_95_P017111 DV157821     |
| 36365 | 428 | 70 | 612  | TCATAGAGGTTGAAGTGTCTCTCTCCCTCCTATTTTCCCCTTTCATGAATCCGAAAA    | 35419 | A_95_P253019 EH618843     |
| 36366 | 428 | 71 | 818  | AAATAACAAATCTTTGGATTTGTGCCCTCATCTTTTCTCCCCTGGATTACTTTGAAT    | 35421 | A_95_P117402 DV160325     |

|       |     |    |      |                                                             |       |                           |
|-------|-----|----|------|-------------------------------------------------------------|-------|---------------------------|
| 36369 | 428 | 74 | 1012 | GAGGGAACTCTTAAAAGTCCTACTTATGTGTATATTAATTAAGACTACGTTGTTTC    | 35427 | A_95_P191692 TA15293_4097 |
| 36371 | 428 | 76 | 1580 | GAAAAAGATAGGTTGTAATGCATTGGTTTTGCAGTTGTCGGCTGGATTGGCCTT      | 35430 | A_95_P009401 TA14843_4097 |
| 36375 | 428 | 80 | 528  | TTTACTCCTTTATTCTTCAGCAATTTGAAAACCTGCAAACCCCAAGGTACTATGAC    | 35438 | A_95_P170391 EH664892     |
| 36377 | 428 | 82 | 397  | CCTCTGGTTTTAAGTACTATTTCTTATAATGGGTAATCAGTGCTGGCAGGCAATTTTC  | 35442 | A_95_P098258 BP534390     |
| 36378 | 428 | 83 | 890  | CGCTCTGGTCATCCCAATGTATACACAATTTAGTTTGTGGGATGGTTTATGTTATGTTT | 35444 | A_95_P221022 TA21732_4097 |
| 36384 | 429 | 4  | 672  | AATTGACTACTATGCGAAAAAGAATATGGTAGTGAACCTTCTGCAGAGGAACCACC    | 35455 | A_95_P127012 EB678753     |
| 36386 | 429 | 6  | 715  | GGTTTACTAGCATCGGCCTATGTAATGGAATTTTGTATCTGTTTTTGGAAATTGTTTG  | 35459 | A_95_P191317 DV159804     |
| 36389 | 429 | 9  | 630  | AATTTTGTTCAGTTCACAGGAATTCTCAGTTGCTCCTTGTGGTGGGTTGGATAAAA    | 35464 | A_95_P118507 DV161596     |
| 36391 | 429 | 11 | 839  | TTTCATTCACAGGGCACTGCTGCTGTTGCATTGGCTTCATATTTCTGCTGCTGTTACTC | 35468 | A_95_P225652 FG166616     |
| 36397 | 429 | 17 | 583  | TTGTCTGGTTTTTGGTAATACCTCAAGTTTTCACTTTGGCTTTTTGGCCATGGAATTGC | 35480 | A_95_P263251 FG643630     |
| 36399 | 429 | 19 | 675  | TTAATGGGCTTCTGTGTCAATGTCATTGCCAAAATCATCTTGTCTTGGTCGGCAA/    | 35484 | A_95_P261336 FG645254     |
| 36400 | 429 | 20 | 727  | TGGTTGTACCCACTTTTTCTGTTTCTCTTATTTATCCGAGCGAAATTCATTGGAAAA.  | 35486 | A_95_P149107 DV158658     |
| 36402 | 429 | 22 | 0    | TCTAGGAAATTTTCTAGAAATGCCTATACATCATCTAGCATGCCTTTTTTGC GGCC   | 35490 | A_95_P259766 A_95_P259766 |
| 36411 | 429 | 31 | 482  | TTTTGCTTCAGGCTTGAACCTTTCGGCAGAAGCTTCAGATGGAAACTGCAAAG`      | 35508 | A_95_P072460 BP525966     |
| 36413 | 429 | 33 | 872  | AAGCAGGACTGGCGAATTCAGTGGTTATACAAAATTTTGTATGAGGTGCAAATCA/    | 35512 | A_95_P215417 DV159723     |
| 36423 | 429 | 43 | 0    | GCTCTGACAATTGGTCTCGAACTCGAAATAGACTTGCTAGTATTGCGTATTCTGTTTT  | 35532 | A_95_P027241 A_95_P027241 |
| 36428 | 429 | 48 | 707  | CTGTAGGACCATTTCCAGATGTAATGTTGCATGATGGTAGTAAAGGTTATTCCAATTT  | 35542 | A_95_P119607 DV999054     |
| 36429 | 429 | 49 | 521  | GGAGTGACAGTTGAATAAGCTGGGTTTCATCAATAACTTTTCTGTAGCCATGTAAC    | 35544 | A_95_P152812 EB683154     |
| 36431 | 429 | 51 | 727  | CCAGGCTTTGGAATTATAGAATATGGCATATTGATTGATAATGGAAAGAATATGCA    | 35548 | A_95_P182167 TA13147_4097 |
| 36432 | 429 | 52 | 597  | TGACGACGTTAACAGTATACGTAGTGAATCTGATCACTACTTGATCTGTGTATGA/    | 35550 | A_95_P159127 EH617079     |
| 36439 | 429 | 59 | 524  | CTGGGAACATAAGTGACTATTTGGCTGCTGATACATGATTTTGGCTCAACCTTCGATAT | 35564 | A_95_P018606 TA16671_4097 |
| 36442 | 429 | 62 | 115  | GTGTTAGTACAATGTACTCTTGTGAAGGTGTTAGTGCTATCTTTCTAGCCACTTCAA1  | 35570 | A_95_P031556 DW001061     |
| 36444 | 429 | 64 | 839  | GTCACGAATGGTGGTTGATTTACATATCTCATACTAATATACGATATAGTAGTACTGC  | 35574 | A_95_P226589 EB451471     |
| 36448 | 429 | 68 | 455  | CGATCATTCAAGTGGATTTCAATTTGGTGTACTTGTCAAAGGATACATGGAATAGGTA  | 35582 | A_95_P040316 BP129793     |
| 36449 | 429 | 69 | 616  | ATGCTGATATTCTGGAATTTCTGGTGGGAGATGGGAAGTGGAAAAGTTGACCGGTT    | 35584 | A_95_P057861 BP134324     |
| 36456 | 429 | 76 | 736  | AAAGTATTGGAAGTGAATGTTGAGAAAGGGATGCAACACGGTCAGAAGATTGTTTT    | 35598 | A_95_P138602 EB442337     |
| 36458 | 429 | 78 | 287  | TTGTTTATGATTGGGAGAGGGATCTACAATATGTCTCATGGGCATAGGTAAGAAGG/   | 35602 | A_95_P085545 FG637879     |
| 36464 | 429 | 84 | 605  | TTACTACGTCTTTCTTGGGTTGCATAATTGTCAAAGTTGTTGATTTTAGCCCTGAATG  | 35614 | A_95_P234724 FG638771     |
| 36467 | 430 | 2  | 505  | ACAAAAAGCTGTATTTCTTCTTCTCTCAATCAAGTTTCATGTGCATAGGTGTGATTC   | 35452 | A_95_P052336 BP132898     |
| 36468 | 430 | 3  | 685  | CTGGTACCTTTTGTGTTTTTATTGTGGATGTTTTGGTAACAATGGAAGTGTCCCTGC   | 35454 | A_95_P120327 DW000159     |
| 36470 | 430 | 5  | 551  | GCTTGTAATCCTTGTGGCTTTTGGTTACATGATGCTTGAACGGATTAGAACCGG      | 35458 | A_95_P004346 EH617829     |
| 36471 | 430 | 6  | 168  | ATGTCCTGTACGATTGTTGATACATGGAACGATAGTTGCTGGACTATTAATTCCTGT   | 35460 | A_95_P145597 EB449365     |
| 36478 | 430 | 13 | 481  | AAACATTGTCGATCTTAGGATCACGTTGTATGTGAACTATTTGAAATTCAGTTGCTG   | 35473 | A_95_P160752 EH619425     |
| 36483 | 430 | 18 | 779  | CAACTATAGTGAGCTGTAGCTTCAGCAGAGTTCCATTTCTGTCAGTTCTGCAAATTTGC | 35483 | A_95_P012281 TC48787      |

|       |     |    |      |                                                             |       |                           |
|-------|-----|----|------|-------------------------------------------------------------|-------|---------------------------|
| 36484 | 430 | 19 | 610  | CGTACTTGAAGCTCCAAAATTTGTCCTTTCTCCACCACCGGAGTTTAAAGGGTCCTAA' | 35485 | A_95_P037348 BP128980     |
| 36485 | 430 | 20 | 750  | TTGCCTTTGGAGTTTTACTATTGGAGCTTATTACTGGTCGTCGTGCAGTTGATTCGTA1 | 35487 | A_95_P211592 DW000813     |
| 36492 | 430 | 27 | 322  | GCCAGTGACCAGTTACTCAATGGCAGTGTATTTGTTTTATAAAAAAGATTTGCTCGGC  | 35501 | A_95_P212583 TA19867_4097 |
| 36495 | 430 | 30 | 260  | GGAGGTTGCACCTAATTGATTTGCTGTTAAACATGTTTGAATCGGTGTAAAATGTTG1  | 35507 | A_95_P028181 TA15647_4097 |
| 36500 | 430 | 35 | 382  | TTCGGGGGGTTGAAAGATTTCTGGGTATAAAAAATTTAGGAGAGATAGAGTTTTCCGC  | 35517 | A_95_P308853 FG643714     |
| 36501 | 430 | 36 | 2    | GAAAACCTGGATACGTGAAGTTGTCAAGCTTCTCTCAGTCTGCTGCTATGGACATGGA. | 35519 | A_95_P045706 TA16788_4097 |
| 36509 | 430 | 44 | 840  | GGCATAATTTACCTTCATATTTCAAGTCACTTCTCTTATTAATGCATCTCGGGAGAATA | 35535 | A_95_P017711 DV160640     |
| 36510 | 430 | 45 | 576  | GGTGTGATCATGTGGATTCGTTGATATGTGACTATCGAATGGCTGCTTTGTTCCAAA/  | 35537 | A_95_P307558 FG638728     |
| 36511 | 430 | 46 | 207  | AAAGCAAGACTTGGGTATTGTTCTCCCAATTCAACTGTGTATTATGAGGTTGAGCTT   | 35539 | A_95_P211978 FG197884     |
| 36513 | 430 | 48 | 1303 | GAAAAAATGTACAACTGTGGGGAAGTAACAGTAATATGTACACCAATGGAGCTTTTC   | 35543 | A_95_P008496 AB031321     |
| 36520 | 430 | 55 | 882  | AAGCCTCTTTCTTTTCCCTTTTCTGTGCTGGTGCTATCTCATTAACTGAGTAAGTCC   | 35557 | A_95_P024416 DW000175     |
| 36522 | 430 | 57 | 810  | AGGCTCAATCTTTATGTGTAAGTCTTTCTTCAGAGTACTGTCTTTCAATTTGGTCT    | 35561 | A_95_P015351 TA15727_4097 |
| 36530 | 430 | 65 | 709  | TTATAGTGAGGTGGTTCCGGATAGGATTGATCGGGAGATGTTCTGGAGCCGATACTT   | 35577 | A_95_P150287 EB680392     |
| 36532 | 430 | 67 | 384  | TTAACCATTTCAACATTTGATCTGTGAAACTGAAGAAGCTGTTTTACGTCTTTCTCTG  | 35581 | A_95_P105657 CV017557     |
| 36533 | 430 | 68 | 584  | CCGTCTTTTGTCTAGTTTATTGGTACTACTTCTTGTAGTAGGACGTAGATTTTAGTTTT | 35583 | A_95_P002516 FG170570     |
| 36534 | 430 | 69 | 670  | TTCTCCATTTTGTGTGACTTGTGCAGGCTCGTGGTTAATTATTGCGCAATGGATA/    | 35585 | A_95_P019881 TA13383_4097 |
| 36536 | 430 | 71 | 848  | AGTAGTCACACGAAGTGAAGTGCATATGAGTATATAAAAGCAGAGTACCAGAAAA/    | 35589 | A_95_P196347 EB426369     |
| 36537 | 430 | 72 | 211  | AGTATGCTACAAAACCATAACGATGCTAGCTCCGGTTTGTAGGAGAGGTGGTGATTC   | 35591 | A_95_P131797 EB432206     |
| 36542 | 430 | 77 | 812  | GAGAACTTTGATATGCCCTTTTATCACCCAGAGACCACTGAAAGTCAGTGTGAGCATC  | 35601 | A_95_P305933 FG147814     |
| 36546 | 430 | 81 | 635  | ACCTCTGCTGTTGTCAACAATAGTTCCAAGTTTATCAGCAATGCATATTCATTCTTTG  | 35609 | A_95_P219152 TA21337_4097 |
| 36548 | 430 | 83 | 340  | AAACTAGTCGAGGCATTTTTTGGATTACAGATGGAAATTTCTAGTTGATCATTGGTGAT | 35613 | A_95_P094723 BP532846     |
| 36557 | 431 | 7  | 633  | AGTGGCACAATGAAGGATTTTGGGGTCGTTGGTTCAAAGAGATCATTCTGGTCAAC    | 35629 | A_95_P252594 FG185511     |
| 36560 | 431 | 10 | 1153 | GGTTGTAAGCGTTTTTGGCTTCTTGTAGTTCTTTATCATGTGCTATGTAAGTTATGTG/ | 35635 | A_95_P010226 TA14416_4097 |
| 36561 | 431 | 11 | 774  | GTTGCCATTACATTCTGCTTTAGTATCCTCCAATTTGGCTGAAATATAATAGTAGAGC/ | 35637 | A_95_P185687 TA13967_4097 |
| 36562 | 431 | 12 | 471  | TATCCGAACGTGGAATTATTGCTTTTCGTAGTCGCTTTGGTTGTGATTCTGGGAGGC   | 35639 | A_95_P160802 EH619499     |
| 36564 | 431 | 14 | 481  | TATGGTCACTTGCTTTTAGTGGTGAAGGTTCACTTCTTGCATCTGGCTCTGCTGATTG  | 35643 | A_95_P034568 EB679195     |
| 36567 | 431 | 17 | 180  | AACTGAGACAGCACAGTTGTTTTGAGCGCACCTAAAGATGAGGACATTTGTTCCGC.   | 35649 | A_95_P106082 CV017751     |
| 36568 | 431 | 18 | 500  | CCACATCATCAATCTAAAGGGATGTCATCCCTACGGAGATAGTAGACTATTTGATCTA  | 35650 | A_95_P036813 BP128829     |
| 36569 | 431 | 19 | 515  | TCGAGCTCTTGTGACGCTACTTCTCAAACATGACCAGAGGACTGTTAGGACAAATTTGC | 35652 | A_95_P264351 BP529347     |
| 36570 | 431 | 20 | 561  | TCTACCATAACGATTTTGTGGGATCCTTTACAACCTGGAATGCTTGTATCTGCAGTTTT | 35654 | A_95_P047361 BP131638     |
| 36571 | 431 | 21 | 1084 | GATCTCTAGTCTTTTCTCCCTATATTAATAAAAATCAGCGGGGCAGAGACTTTCAAT   | 35655 | A_95_P206017 AF081794     |
| 36573 | 431 | 23 | 321  | TGCAGGGAGTTCTCTTTTCTTTGGCTATTAATTGCACGTAATCTGAAAGGGTGGGGA/  | 35659 | A_95_P160877 EH619576     |
| 36575 | 431 | 25 | 664  | CCTTGCTCTAAATCCCATTTGTGTAAGTGTGTTGTTGTTGTTGTTGTTGTTGTTGTTG  | 35663 | A_95_P288008 EB437505     |
| 36576 | 431 | 26 | 590  | TTGCGGAATGTAGCCTTTCTTGTACGTTTAGTAATGATTAACACGTGGATTAACCTA.  | 35665 | A_95_P314228 FG166441     |

|       |     |    |      |                                                              |       |                           |
|-------|-----|----|------|--------------------------------------------------------------|-------|---------------------------|
| 36579 | 431 | 29 | 725  | CTCTGTATTGTGGACAATAGCACTATCGTATCTTTACTCAAAAATGAATGTCAGTAAG   | 35671 | A_95_P144652 EB448124     |
| 36580 | 431 | 30 | 722  | CCGATCTTCACAGGAAGATTTTCCAATGCAAGATTAGTAGCAAGTGGGTTGTCAATC    | 35673 | A_95_P149907 TA13110_4097 |
| 36581 | 431 | 31 | 510  | TTAGAGGAGACTAATTAAGTTACCAGTGTACAATTTTCGACTGTACAGAAGCTTGGA    | 35675 | A_95_P266906 AM840784     |
| 36582 | 431 | 32 | 414  | TCGAAGAAAAGATAATCTTTACAAAGACGCAATGGAAACAGCCTCGCAATCTGGGGA    | 35677 | A_95_P032521 AB120536     |
| 36584 | 431 | 34 | 290  | CGGTCTGTAAATACACTATTTGCTGCAGTTAGATATCGTGGTGAGATAATTTGTGCC    | 35681 | A_95_P080255 AM830869     |
| 36585 | 431 | 35 | 647  | ACTTAACAAATTGGCTGGTTTCTTGGCCCTTTCTCTTAATGTACATATGTGTCAAAA    | 35683 | A_95_P160377 EH619077     |
| 36589 | 431 | 39 | 118  | CTTGAGAAAAGAAATAGAGCCGTTGTAGCTTATTCAAGGATCATTACTTTCAAAAACA   | 35690 | A_95_P112887 CV020905     |
| 36591 | 431 | 41 | 532  | TGTGGCTCTCCACACGCTAATAAATGGATTAGGAGTTCATATGAATACTTGTTTGTTA   | 35694 | A_95_P255949 FG635710     |
| 36595 | 431 | 45 | 831  | ACAGTGACACAAACAGTGATCGATATGATGAGCAGCTTATCAGATTACTTTAAACAAT   | 35702 | A_95_P208137 EB679127     |
| 36598 | 431 | 48 | 630  | AATTCTTGTTTGTGCACCGATGCATCACTTGGGAGCAACTTTTTAGTGTAGCTGTTA    | 35708 | A_95_P007376 DW003514     |
| 36602 | 431 | 52 | 956  | GCCCGACTTGTTTATAAGGTTTAACTCCTTTTTGTTGTACTTGATCATATCAGAAGTTT  | 35716 | A_95_P015996 TA19056_4097 |
| 36603 | 431 | 53 | 400  | GTGGTCTGTTGCTCATTTTAAAGTTAACATACTCATTGATGGGGATTCATTTAACCAG   | 35718 | A_95_P089008 BP530299     |
| 36605 | 431 | 55 | 1493 | AGTAGCTTCATCGAGAATCTGAAATGACAGACAGCGCTTGAGACGTAATTCTGGCA     | 35722 | A_95_P191987 TA15356_4097 |
| 36614 | 431 | 64 | 714  | TGGGATTGTTGGAGATGTATCCCTTAACTATCTAAGGAGAAATACTCATAGATATA     | 35739 | A_95_P218617 EH615151     |
| 36615 | 431 | 65 | 564  | GAAAAGTTGGTGGTTTTGTTTGACGTTTGGCCACTCTTGGATTATGAATTTATTGG     | 35741 | A_95_P142077 EB445642     |
| 36617 | 431 | 67 | 622  | GTTTGTAAATCATAACAATACTTGGGTTCTACTATCTCTCAATTAGTAGGGATGATCGT  | 35744 | A_95_P027511 TA13972_4097 |
| 36618 | 431 | 68 | 386  | CAACCCTACTTTGAACTCATGGACAATACCATTTTGGTGATTGGTTGACTATATATTA   | 35746 | A_95_P100753 BP535507     |
| 36621 | 431 | 71 | 1670 | CTTCTGTAAAATACAGCTGAAAAGCACACATATATTGTCTGGAATATATTGAGAGCA    | 35752 | A_95_P009776 AB075950     |
| 36622 | 431 | 72 | 851  | GTTTTGATTATATATTCAACTTAGTTGTTTTGCGTCGCATGGAATGTAGTGAGTTGAG   | 35754 | A_95_P177312 TA11946_4097 |
| 36628 | 431 | 78 | 1168 | TATGTTTGTATGGTGTTCATGTATGCGGTCTCTTTCTTGGCCTAAATGCATGCTTTTT   | 35764 | A_95_P203177 TA17798_4097 |
| 36630 | 431 | 80 | 326  | TTTCAGAGGCAATATCAACTGCTGTCATTCAATGTTAGTTGGTTGGGCAACCAGCTGC   | 35768 | A_95_P094238 BP532614     |
| 36632 | 431 | 82 | 265  | TCAATATTACCAAGTTGCCTTTGCTGCCGCAAGAGGTTTGAAGATGCTGTTGTAGATC   | 35772 | A_95_P099253 BP534854     |
| 36636 | 432 | 1  | 839  | ACGTATATGTGGTTAGATGTCATATCATCCTTACCTCTGTACTGCAGTGATGAGAAGT   | 35618 | A_95_P245367 EB449740     |
| 36642 | 432 | 7  | 454  | CACAGATTGCTTTTTCTACATTAAGTTTTGCATGTATGCCACATCTGCTTATGTATGGA  | 35630 | A_95_P221007 TA21729_4097 |
| 36644 | 432 | 9  | 792  | AACTGGTCCTGATGAGCAGAAAGGAGTTTGCATGATGCGTTGTGTGTTGTAGATGTT    | 35634 | A_95_P272461 FG135963     |
| 36645 | 432 | 10 | 1194 | GGTTTCTTGTAATGATGAAAGACAATGCATCAAGGCACTTAATAAACTAAGCTTTCTT   | 35636 | A_95_P013771 TA13849_4097 |
| 36646 | 432 | 11 | 860  | ACCTACAAATTTTGTGTTTTGATTGCGATGCTTGAGCGATGTTAGAGATCCTACGTG    | 35638 | A_95_P227709 EB677603     |
| 36647 | 432 | 12 | 821  | CAAAATGGTTCAGACAACACTGTACGCTGTTGATTAATTGGTTAAGACCATCTCGTT    | 35640 | A_95_P017176 TA13237_4097 |
| 36648 | 432 | 13 | 379  | GTACAAGAAATTCGAGTTGTCTTTAGGTCTTGGGTATAATCTCTTCAAGAGAACAA     | 35642 | A_95_P037478 BP129016     |
| 36650 | 432 | 15 | 718  | CTCTAGGACAGTAGAGTTCCATCTCCTTTAACTATTCTGGACAGATTTGCAACGAAC    | 35646 | A_95_P273651 FG635928     |
| 36658 | 432 | 23 | 440  | GATGGACCTTCTGTACAATGTTAAAACCTTAGTATTTCTGACGTTGATATGAGCTACC   | 35660 | A_95_P067335 BP136841     |
| 36660 | 432 | 25 | 335  | TTAGCAGTAGACCCTCTTTCATTGTATTTGGTGATGGAATCAAATTTTCATGCTTTTAGC | 35664 | A_95_P116457 FG629295     |
| 36665 | 432 | 30 | 281  | CGGGGACCCTAGATGATGCTGATAAGGTTTTGGTAGATGTTGGCACTGGATATTTTA    | 35674 | A_95_P121912 EB679221     |
| 36666 | 432 | 31 | 174  | CAACCTCCAAAAGCAAATGAAGAGGATCCCCAAACACATGTAAAAGAGAATATTCAA    | 35676 | A_95_P089453 BP530511     |

|       |     |    |      |                                                               |       |              |              |
|-------|-----|----|------|---------------------------------------------------------------|-------|--------------|--------------|
| 36668 | 432 | 33 | 771  | GACCTAATTGATGTTATTGAGGGAAATCGTAAATACATGAAGTGCATATACGTCTAC/    | 35680 | A_95_P128217 | EB427742     |
| 36674 | 432 | 39 | 528  | GATTTCTTCTTAGCCTTCAACCAGATATCTAACTGTGGTATGCTTCACTACACA        | 35691 | A_95_P127642 | EB682835     |
| 36678 | 432 | 43 | 491  | GTAGGACCAGCAGTTCATTTATCCTTCTTTGTTTTCTCAAGAGGAGATAGCTCATG`     | 35699 | A_95_P106657 | CV017995     |
| 36681 | 432 | 46 | 279  | TAGTCATGTTTTTCGATCCAACCTAAGGGTACTACTATCCAAGTTAACTCGAAGACCAG   | 35705 | A_95_P043376 | BP130599     |
| 36682 | 432 | 47 | 882  | GATATCTATACAGTGAACCTGTGGCATGGCATATGGTCAAGCAGCAATGCTTCTGTCA/   | 35707 | A_95_P015746 | EB427484     |
| 36683 | 432 | 48 | 832  | TTATGTAGTCGCTGGTTGATGTACTGTGTGTAGAACTGAATAAACTCTTTGGTTAC      | 35709 | A_95_P185332 | EB677878     |
| 36684 | 432 | 49 | 743  | CCTTGCAAACTGTTTAGCTTCTGTTCTGAGATGCATAAAGATGTACTGAGACAATAT     | 35711 | A_95_P121497 | DW001581     |
| 36685 | 432 | 50 | 913  | AAGGATGTTGGAGATGCATTTTGCATTCCATAATCGTTTGTCTGCTTGACTTTTAGTT(   | 35713 | A_95_P193907 | TA15772_4097 |
| 36688 | 432 | 53 | 1408 | TGATGTTGGTGTGCAAAAGAGCTTATGGCTCATTTAGTGAAGCTGCAATCTTCCCTC     | 35719 | A_95_P186857 | TA14218_4097 |
| 36690 | 432 | 55 | 349  | TTCACATTAAGCTTCGGGCATAAAAGGAGAGCAACAAGACTAAGACTCCTGGTCTCG     | 35723 | A_95_P114887 | CV021807     |
| 36694 | 432 | 59 | 755  | GTGCTGGGATTGGTTAGAAGCCACCGCTATGGTCCTTCCAACCTTTTATGATTGTTTT`   | 35731 | A_95_P018126 | DV159856     |
| 36696 | 432 | 61 | 1781 | CCCCCTTCTCTTAATTTGGTAAACAAACCTACAAATTAATGTTTCTTCTCTGCA/       | 35735 | A_95_P189512 | TA14804_4097 |
| 36698 | 432 | 63 | 614  | CTCTAACTAGCCAGGTCCCAAAGTTGTCTAGTCTCTTGAAGTCTATGGGGAAACATAT    | 35738 | A_95_P042771 | BP130441     |
| 36699 | 432 | 64 | 327  | TGCTCTAGATTCTGCTGCTGCTCTTTAAGGAACATATATTTGTACCAAGTTATTCAGT/   | 35740 | A_95_P111742 | FG638507     |
| 36709 | 432 | 74 | 153  | GGCTCTGAAGCTCTTTTTGTCGTTAAATTTATCGGTTATTGATGAAAACTTGAGCTT(    | 35758 | A_95_P107902 | FS383363     |
| 36711 | 432 | 76 | 520  | GATTTTGATAAGCTTGAGGAAAGGGCTCTTGATTTCCGTCCTAAGATACTTATATGTG    | 35761 | A_95_P073540 | DV161209     |
| 36713 | 432 | 78 | 579  | GTCATTGGTGGTTCCAAAATTAGTGTATACCAATGTTGATGCATTGCATCTAATT(      | 35765 | A_95_P025556 | EB436800     |
| 36715 | 432 | 80 | 822  | CTTCAAAATGTGTTTGACAGTGCACGTGCAAGGGAACGAGAGAGAGAACTGCATTA`     | 35769 | A_95_P150442 | EB680516     |
| 36720 | 432 | 85 | 1309 | GTTATTAAGTGTGTTGTTATAATTAAGTTTTGGACCGTATGCTGCTTGATGGGTTCTGTT( | 35779 | A_95_P009071 | TA11879_4097 |
| 36724 | 433 | 4  | 443  | GTGTCACAGCTTCAATTTGAATCATAACGCAATTAAGAGAATCATGTACTGATAATGC    | 35786 | A_95_P113242 | CV021072     |
| 36725 | 433 | 5  | 713  | ATTGGGTTTAATTCCTCAACAATCTATGATATTGGGTGGTGAAGGAACAATGGATG      | 35788 | A_95_P142647 | EB446082     |
| 36726 | 433 | 6  | 812  | TCTAAATGCTGTCAGATCCTTATTGCAGAGTGCCAGTCGATTGACATTGACTGCATGC    | 35790 | A_95_P309453 | FG149083     |
| 36733 | 433 | 13 | 621  | GTAAATGGACCGACAGAGGGTCTCATGTGATATATTCTCAGCATTCTTACAGCTCTAC    | 35804 | A_95_P159102 | EH617057     |
| 36739 | 433 | 19 | 527  | TTGGCTCTGATGGAATTCATGTGGGAGCTTCATAGCCCTCTCTAATTGTACTTTCTTT    | 35816 | A_95_P122272 | DW002294     |
| 36741 | 433 | 21 | 357  | AACTAACTAGTCCTGAGAGTCAAGAAAAGAAACATGCACCAGACGATCAGAAACT/      | 35820 | A_95_P071800 | BP525796     |
| 36747 | 433 | 27 | 703  | AACTGTTTATGATCACGACACGTTCCAGCATGGACGACAAAATGGGAGATGCAGAATI    | 35831 | A_95_P304998 | FG185820     |
| 36749 | 433 | 29 | 954  | ATGTACAAGGAAGAGATGAAGAAATTGAGCTTGTGATTCCGCCAGTCTTTGACAAC      | 35835 | A_95_P015536 | TA18756_4097 |
| 36750 | 433 | 30 | 1356 | ACCCTCAAGTTAGTGAGCCTGTAACAACAAGTTTTATTGCTAGGGACTGAATAAATGA`   | 35837 | A_95_P106272 | TA14079_4097 |
| 36752 | 433 | 32 | 80   | CCCTTGAGATTCTATCTTTTGTGCCCTTGAGATTCTATCTTTTGTGCTTATGTACAACA/  | 35840 | A_95_P140437 | EB444343     |
| 36753 | 433 | 33 | 562  | TTTGTTGCTTGGTTGTGATAATCACACATCGCTTTAGAAAAGAAATTTCTCTGGTTGGT/  | 35842 | A_95_P195417 | TA16110_4097 |
| 36754 | 433 | 34 | 668  | GAACTGTTATGGTTCTCTTATAATTTTGTAAATGTAATATGGTCTTGTGCGGATGT/     | 35844 | A_95_P293598 | FG635844     |
| 36759 | 433 | 39 | 0    | TTAGCTTCTGTGTTGAACTTTGTACCTCTATATGTTTATGACTAGGTATAAAGCTGA/    | 35854 | A_95_P273938 | A_95_P273938 |
| 36760 | 433 | 40 | 921  | AATTGTTTCTGCTCTTACAAGCTGCGTATCTTAAAAATACACAGGAGTACTTATTGTC(   | 35856 | A_95_P135512 | EB438996     |
| 36763 | 433 | 43 | 669  | AGATGTACTGGGATGTAACCTATCTTCAAATAGTGAATGGCCAAGATTTCTTTGGT      | 35861 | A_95_P254544 | EB437757     |

|       |     |    |      |                                                             |       |              |              |
|-------|-----|----|------|-------------------------------------------------------------|-------|--------------|--------------|
| 36767 | 433 | 47 | 721  | AACCAAATATGGAAATACCATCTCCATCGCTTTGTGTCCTTATTCCGACATGGTCCAC  | 35869 | A_95_P283788 | FG187360     |
| 36776 | 433 | 56 | 745  | ATGCAGACATGCCTTTTTCTCTTGATGTTACACATGTAATATGTTGAGTCTATTTGAGC | 35886 | A_95_P245382 | EB677364     |
| 36779 | 433 | 59 | 704  | CTCAAATAGAACGATCTTTTGTATTTCTACGGCACAAGATGGTGTGATACATTTATTT  | 35892 | A_95_P131022 | EB431153     |
| 36783 | 433 | 63 | 323  | GCATTCTGCTTTCTCTTGATGCTTTTGGATTGTGTTTTAGATCAAGAAAATTTGTGCC  | 35900 | A_95_P014726 | FG622502     |
| 36787 | 433 | 67 | 780  | TCATTCCAAGTGTTAGAAAGGAGAGCGTGGTGTAACTGGTAAAGTTGATGCCATATGA  | 35908 | A_95_P145242 | EB448829     |
| 36789 | 433 | 69 | 458  | AGTATCCTTGCAATTATCTTGATTGCCAGAATGCTTCAATGCATTAGGAAAGAAGA    | 35912 | A_95_P209877 | FS405773     |
| 36791 | 433 | 71 | 757  | GATCTGGTAGGCATTAGAAGCTACTTCTGATCAACATTTTCATGCAGTTGTTTTCGAAA | 35916 | A_95_P122322 | DW002321     |
| 36793 | 433 | 73 | 0    | ACGCTAATGTGATTTGCATTTTCTATCGTCGAGGTAATTATCATTGACCAAACAA     | 35920 | A_95_P315603 | A_95_P315603 |
| 36796 | 433 | 76 | 403  | GACACCAGTCTTGGGTAGATTTGTTATGGATTGGCATTAGCAGTATTATAAAACCTT   | 35926 | A_95_P002276 | BP533488     |
| 36799 | 433 | 79 | 1513 | AAACGCTGTTCCCTCTCGAGGATGGGAATAACAAGCATATTTGGGGCTATATATAAA   | 35932 | A_95_P178727 | TA12329_4097 |
| 36800 | 433 | 80 | 701  | CCTGTTTCCTTTAGTCTTTGTGCAATTGGTTCATTATGTAGACATGTTTTATGAATGTG | 35934 | A_95_P116522 | DV159284     |
| 36804 | 433 | 84 | 469  | GACTCAAAAGTATGCCATGGGTAGTTGCTGAAACACAAGTATTAGGAGGTGCTCCT    | 35942 | A_95_P178067 | EH619487     |
| 36806 | 434 | 1  | 822  | TCTATGTGAGTTTGCCTTTTTCTTAGGGTTTGTGGTAATAAGACAAATTGGCAATT    | 35781 | A_95_P228709 | EB443398     |
| 36807 | 434 | 2  | 512  | TGTATTGAAGTATGTGGTGTATGCTGATAATGGATACTCAAAAATTGGGAAGTGGTA   | 35783 | A_95_P107732 | TA12078_4097 |
| 36808 | 434 | 3  | 1071 | CTGTAAGTGTGCTTGGTCATTGAAACGGAAGTGTATTCAATCATTGACGATATAC     | 35785 | A_95_P022026 | TA15152_4097 |
| 36809 | 434 | 4  | 671  | TGAGGTAGCAAGTATTTCTGTTGAGTTGGATTCTGTAAGTTGCTTTGTTTTGATGATT  | 35787 | A_95_P021461 | TA14285_4097 |
| 36810 | 434 | 5  | 729  | ATACCAAGATAGTGAGACCTGCACAGGTGTATACTGGTGTATGGATGCGTCACTATA   | 35789 | A_95_P209767 | TA19260_4097 |
| 36812 | 434 | 7  | 788  | CTCATATAGATGGTTAAGAGTGCTATGACAGTTGCTAAATGATCATTGCTTTGCTGA   | 35793 | A_95_P016406 | EB678695     |
| 36813 | 434 | 8  | 289  | AAGTGTAATGTGAATGGCGAGTTTCTTCATCCTATTGCGTTGAAGTATGTAGAATT    | 35795 | A_95_P145997 | EB449808     |
| 36816 | 434 | 11 | 495  | CGTGGAAGAACATTCCATGCACCATGTGAAATCTCGTATTAGTTTTGATTTGATTTCA  | 35801 | A_95_P032036 | BP530801     |
| 36818 | 434 | 13 | 922  | GCCAGTAAGGACCTTGAATCAATTATAGTACTTTTTGTGTAGCACTTGAGACCCTAATA | 35805 | A_95_P185872 | TA14008_4097 |
| 36819 | 434 | 14 | 236  | TTACCAGGCTGATCAACAGGAATACCACCATACCTACAAAGAAAAGCCAGGTGTTCT   | 35807 | A_95_P241385 | AJ718290     |
| 36820 | 434 | 15 | 0    | AAGATGATGGAAAGGCTGTGGGGTGAGAACTTCTTGACCTGCACAAAAGTGACACA    | 35809 | A_95_P311248 | A_95_P311248 |
| 36821 | 434 | 16 | 788  | GAAAGTATGCAAGAAGCAATGCATCGATCAAATTTGGAGATGAGTGGTGCAGAATA    | 35811 | A_95_P121067 | DW001078     |
| 36823 | 434 | 18 | 258  | GCTTTTCGTCCGGGGACTAATAAATATGTTGTGGATTAACCTTTTGTGAGATTTCTA   | 35815 | A_95_P069945 | BP192481     |
| 36830 | 434 | 25 | 1172 | AAGTTCAAAGAATAAGACTGTCGCAGATGGACTCACTTGGACCCACGTACATCAGAC   | 35829 | A_95_P034808 | AY729656     |
| 36834 | 434 | 29 | 428  | TACTAACAATGTTGGTTGGTTTCCCTGTTTCCCTCAGATGTACAATAGCTAATTGACA  | 35836 | A_95_P002146 | TA15963_4097 |
| 36841 | 434 | 36 | 1819 | TTTTGATTTGCAGTGTTCAATACAATGTGCAGATATACATCTCACTTCCCATTCTGAT  | 35849 | A_95_P239384 | AY220479     |
| 36843 | 434 | 38 | 197  | TGTCTGACATTCGCTTGGAGCTGGTGTATTAATCTTGAAGTGGAACAGTTTGATCTT   | 35853 | A_95_P133807 | EB435495     |
| 36846 | 434 | 41 | 3187 | CTTTTTCTAGTGAAAGTGTAAGACGATGGCCTATATTATTTCTGTTGCTTATCATGT   | 35859 | A_95_P007901 | X79794       |
| 36847 | 434 | 42 | 836  | TGAGTCAATTTTGGAACTCGTTTGTGAGATCTGCTCGGAGCCAGTTGTTGAAGTCTT   | 35860 | A_95_P149227 | EB678942     |
| 36848 | 434 | 43 | 818  | AAAGTTGAGACAACCTCTGTCAAGGAGAAGTCTAAGGAAACTTACCACCTCCTCT     | 35862 | A_95_P245297 | DV159622     |
| 36849 | 434 | 44 | 87   | CCCTTGAAGAAGGAAGGGAGCTCGCATTATGTATAAATTTGTAAATTTTCTACAG     | 35864 | A_95_P142942 | EB446355     |
| 36850 | 434 | 45 | 627  | CGTTCGAGACTCGGAGTACCCTCTGTCTTGTGTTTTCTATTGCATACTTTTATTTA    | 35866 | A_95_P065750 | BP136415     |



|       |     |    |      |                                                             |       |                           |
|-------|-----|----|------|-------------------------------------------------------------|-------|---------------------------|
| 36851 | 434 | 46 | 326  | GGTTGTTGGATATTTGGTTAAAGGCATAGCAATGCATTTGCATGGTGCATTTTCTTTT  | 35868 | A_95_P002216 BP531361     |
| 36858 | 434 | 53 | 568  | ACCACTCTGTACTTTCTGACAAATAACCCATGTTTACTGCTGTGCTGAGACGAACA    | 35882 | A_95_P049406 BP132154     |
| 36861 | 434 | 56 | 307  | ACTGATGGGGAATCAAATCTGAATATCATTGCCATCCAAGCCCAAGTGGTTCCACTTT  | 35887 | A_95_P106602 CV017969     |
| 36863 | 434 | 58 | 617  | CTCTTGACACTAAAAAGAGAGTATTTTTCAAGCTTGGGTTCTCTATTGATGAATCTGG  | 35891 | A_95_P047386 BP131645     |
| 36864 | 434 | 59 | 589  | GGTGAGCCTCGCTTATCCATATGCTATCAAATTTTGTCCATGTTTGAGATATTTCTTTG | 35893 | A_95_P140037 EB443965     |
| 36866 | 434 | 61 | 851  | AAATTCAAAACTGGAGGAGAGCACAATCTGGTTGCATGGGCAAGACCCTTGTTCAT    | 35897 | A_95_P290018 DV161730     |
| 36867 | 434 | 62 | 898  | GTTATGGTGGCATTGCACCTTGTTTACTGCATCTTTCAATTTGGTACAGAATGTTAAAT | 35899 | A_95_P007881 EB446591     |
| 36869 | 434 | 64 | 297  | GCTGGTGGATATCTGGAATTAGAGTTTTTAAATTTTCATCTCCCTTCAGCTAAATGAT  | 35903 | A_95_P111382 DW003761     |
| 36870 | 434 | 65 | 442  | AGTAGCTACTAGCTAATGAGAGTTGAGATGGAGTTGGAGTAGTACTTATCAATAAG    | 35905 | A_95_P029096 TA14334_4097 |
| 36873 | 434 | 68 | 1033 | GTTTCTAGGGGTACAAATTCGTTTACCTCTAAGTTATGGTGAAGTGGATTGTTTGT    | 35911 | A_95_P193172 TA15614_4097 |
| 36874 | 434 | 69 | 699  | ATGTACATTGCTAACATGGACCCATGATTTGGTGAAGTAGGTTCAAAGGTTAGTGT    | 35913 | A_95_P291123 DW002771     |
| 36876 | 434 | 71 | 576  | AACTGGGTGTCATTGTGGTGTACTCATGCTACTCTTCTGCACATGTTTTCGTATGCA   | 35917 | A_95_P288198 FG634947     |
| 36877 | 434 | 72 | 813  | AAGGTCTTCTTTCACAAGGAGCATTATGGTGTGTTGATGGCCATGGTGGCGTTG      | 35919 | A_95_P119552 DV998906     |
| 36880 | 434 | 75 | 549  | TTTGCATCTCCTGTTCCAAAGATATTGCTGTTAGCTGGGACAGACAGACTTGACAGA   | 35925 | A_95_P146152 FG164293     |
| 36882 | 434 | 77 | 591  | ATGCTTGTGTAGAGAGGGGGGAAGAAGCTATTGCAATGTGGATTGTGACCTCAAA     | 35929 | A_95_P020471 BP133283     |
| 36885 | 434 | 80 | 1266 | ATTCCAGATTCTCCTGGTCCGCAAGTTGCCTCACATATGCCTCAAGATTGTTGGTAT   | 35935 | A_95_P286393 EU700061     |
| 36887 | 434 | 82 | 847  | TCCTTCTGGAGTAGTGAAGTATGATTGTGCTAGTCATGGACAGAAATTTACATAC     | 35939 | A_95_P266291 EB424707     |
| 36890 | 434 | 85 | 460  | TATTGTTTCGCAACTTCAACAAATCTTCGATGCTGACTGGACTTCGCCATATGCAGTG  | 35945 | A_95_P260966 AM811421     |
| 36893 | 435 | 3  | 793  | TTTTTCACTTGTGGGTCAAGATTAATCCATTTGTCTCAAAGATGATCCTGCAGCTA    | 35950 | A_95_P118012 DV161028     |
| 36895 | 435 | 5  | 422  | GTATGAAAGGAAGCTGATTTGGGCTGTAAACACGAAGTTATCAATATATATCTCCTT   | 1861  | A_95_P000051 FG625247     |
| 36900 | 435 | 10 | 680  | CTTCCCGTCATTGGAAATTTACCAATTCCTCTCTTATAGCGGCGAGTATAAGCTTCC   | 35963 | A_95_P136547 EB440322     |
| 36901 | 435 | 11 | 523  | GCAAGCATCCAATTGTTTGAATTTAACTTAGTTAATGAATCAGTTTGCCTGGCTTAT   | 35965 | A_95_P124372 DW004214     |
| 36909 | 435 | 19 | 672  | ATTAGAAATCCATAAAGGTGGAAGCTTGGCTCGCCCCACTAGCAATTATACCCAG     | 35981 | A_95_P316278 FG195029     |
| 36910 | 435 | 20 | 1318 | ACGGGTCAGGTCTGATGAGTGTACCTGATTATTTACACTTACATGTGGCTTTATAAAT  | 35983 | A_95_P217572 AJ271748     |
| 36913 | 435 | 23 | 1231 | TCGAGGACTCCACGAAATACATGTACCTTTTGGCCTGTGCAGATTAATGTATCTGTT   | 35989 | A_95_P190452 TA15018_4097 |
| 36917 | 435 | 27 | 269  | AAAGGATTAGATACAACGGATAATGATGCTGAGGAAAATGAGGATTTTCATGGGCG    | 35997 | A_95_P159122 EH617074     |
| 36922 | 435 | 32 | 1243 | GATTGGGAATCGTAATGTGTACAAAGGATGTTGCCTTCTTGATTGTCTATCATGTAA   | 36006 | A_95_P114002 TA13144_4097 |
| 36924 | 435 | 34 | 971  | TTGGTGGAAATCTACTGCGTATCATGCCATGGAAATGGATCAAAAATTGTGAATGAAAG | 36010 | A_95_P018156 TA16444_4097 |
| 36928 | 435 | 38 | 482  | AAGGGCTGATGTTGCTCCATCTATTTCTCCACAAGATCAATAATATCTCTCTCTCT    | 36018 | A_95_P306423 FG635180     |
| 36931 | 435 | 41 | 184  | ACGAGAATGGGGTGAAGAAAAGTAGTGAATACAAGTTTCAACGCTGACAGGAAAC     | 36024 | A_95_P106432 EB450504     |
| 36932 | 435 | 42 | 757  | ACGGCCGAAATAAATGGAGCTGATGTTGTAATTAGTCTCTCGTTATTCAAGAACTT    | 36026 | A_95_P190937 EB677483     |
| 36933 | 435 | 43 | 757  | CTGCAGAACTTACTCTGTCATATCTTGTAGTATATGAAAAGCTTCACAATTGACTTGT  | 36028 | A_95_P211537 TA19634_4097 |
| 36936 | 435 | 46 | 429  | TTAATGAAGGTGCATGCGGCAATGAGTGCAATGAAGTAGTCTCTGTGTATGGGTT     | 36033 | A_95_P187672 TA14398_4097 |
| 36937 | 435 | 47 | 724  | GTTCTCTCTGATTTCCAGCACACTCAAGTCTTTTCTTGATTCTTAACAGTTAAAAT    | 36035 | A_95_P273841 TA12752_4097 |

|       |     |    |      |                                                              |       |              |              |
|-------|-----|----|------|--------------------------------------------------------------|-------|--------------|--------------|
| 36939 | 435 | 49 | 473  | GACCAGCTCGGCTGAACTTTAATCGCCACTGCAACTTGATATGAAAGTCATTACTTCC   | 36039 | A_95_P234814 | FG640961     |
| 36941 | 435 | 51 | 572  | GAAGATAGGTACTGTAGGCGGAGTGATGCCTTATGTTGCCTGGTTGAAGATATATAT    | 36043 | A_95_P059421 | BP134736     |
| 36944 | 435 | 54 | 819  | ATAGGAAGATGAGTTGCAATAGATTCATTTCTTGTAGACTGATACAGATATTAGTCC    | 36049 | A_95_P125027 | DW004831     |
| 36946 | 435 | 56 | 469  | CGTGATCAATAGTCGGTTTGTACAAGCAATTTGAACAGGGTTTTCTGTGTTGTTAAA    | 36053 | A_95_P030061 | BP526699     |
| 36947 | 435 | 57 | 455  | CTAGTTTTGTGTAAGTTACATTTGGTACATAGTCTTCCAGTTATGCTCTACTTTTGCC   | 36055 | A_95_P097638 | BP534127     |
| 36950 | 435 | 60 | 528  | GTTTTTATGTCAGCAACAGAAGCCCAAGCTTATGGAATTGTTGATCTTGTAGCGGTT    | 36061 | A_95_P006906 | U32397       |
| 36953 | 435 | 63 | 523  | AGGCATGACCTGTCATCATCAAAGCTGAAATATGATTCTAATGTATAGTTAAACAC     | 36066 | A_95_P047661 | BP131713     |
| 36955 | 435 | 65 | 240  | TGTTTCGCATGTTTCGTTTTATGTTATCTGTTGTGAATAAAGATTCCGAATTCTGTTCTG | 36070 | A_95_P105417 | CV017455     |
| 36957 | 435 | 67 | 507  | CAAGTCAGTGCCTTCGTAAATTTGGGTTCTAGTACTAGTACAAGTCTTCTGTTAT      | 36074 | A_95_P038766 | BP129365     |
| 36966 | 435 | 76 | 790  | TTTTACTGTTTCAGCAGACGATTGGATGGGAACTCTGAAACAGCACTCCACCTGTTTC   | 36092 | A_95_P234404 | FG172576     |
| 36967 | 435 | 77 | 636  | TTCTAGTAACTCATGTTTCTTCTTTCACATCTGTCTTCTGGTTGGCCTTCCAATCCATGC | 36094 | A_95_P159677 | EH618121     |
| 36968 | 435 | 78 | 379  | GAGAAACAATAAGTCACCAAGGTAAGTACGATGGTAGATACTGGAACCATGTGGAAG    | 36096 | A_95_P110452 | CV019738     |
| 36973 | 435 | 83 | 156  | CACAAGAAGGAGAACATGAACAAAAGAGCTATGACCACTGGAAAAATTGAGCAGAT     | 36106 | A_95_P033844 | AJ717804     |
| 36976 | 436 | 1  | 813  | GGATGACTGTTGAACTCCTCATTAGCTCTTAAATTTATCCCTTCTTCAAACCTTGCTC/  | 35947 | A_95_P010331 | EB439699     |
| 36981 | 436 | 6  | 571  | GAAAAATCATCTTATGCTGTATAATCTGTTCTTGATATACAACTCGTAGACCTAGCC/   | 35956 | A_95_P025816 | TA20291_4097 |
| 36982 | 436 | 7  | 875  | CGGAGATCCCAATTCTTACTCCGTTTTGCCTTTATTGAATTTATTGATGAAGAAGGA(   | 35958 | A_95_P126052 | TA15544_4097 |
| 36989 | 436 | 14 | 697  | GGGGGATCCATCATTCTTGTCTCAATTACTGCATAGTTATTAGATATTATGATGAGC    | 35972 | A_95_P143987 | EB447187     |
| 36993 | 436 | 18 | 1726 | GATTGCCAAGAATTTGCTCTGTTGCAGCAACTTCCCTAATTGAATGGTAGTACTTATG   | 35980 | A_95_P176512 | Z93768       |
| 36998 | 436 | 23 | 675  | CAGGTTTTATTGGTGTTCGAAGTACCGTCCAAGGAACATAATTTGCTTTACCTTTT     | 35990 | A_95_P019056 | EB429308     |
| 36999 | 436 | 24 | 451  | AATGCCTCTTCTTCCGCCATTAATCCATCTCCTCTTCTTCAATCTTGAAAAAATGTA/   | 35992 | A_95_P280563 | AM820707     |
| 37000 | 436 | 25 | 396  | GGATTGGCCAGATGATTTGATCACCGTGATGAATCAATTTAGATGGGTTAAATGATT    | 35994 | A_95_P133407 | EB434850     |
| 37001 | 436 | 26 | 653  | CCTGTGACCTCTACAGCTATACAAATGGTATTTGGTGATACAGTGGCGATTGCTTTAA   | 35996 | A_95_P275013 | FG201694     |
| 37004 | 436 | 29 | 797  | CTGAATCAAGCTGATGGAATGTGTCCATTGTAACAAGATTATATCCATTGAACTTGT    | 36002 | A_95_P012256 | TA16431_4097 |
| 37007 | 436 | 32 | 622  | AGGCATGGAGCACAATTTCTGATATTAGTGTCTTTTGTATCTGACATTGTGTCCTCI    | 36007 | A_95_P186157 | EH618496     |
| 37009 | 436 | 34 | 809  | AAAGAATATAAAGGATGCACGGTCAGCTGCGAAGCACCTTAACGAACAAGCCCTTG(    | 36011 | A_95_P228479 | EB679608     |
| 37010 | 436 | 35 | 377  | ATGCAAAAACCTTGGCGAATGGGCTGGTTTATGCCAAAATTGATTCTGAAGGGAAA     | 36013 | A_95_P004996 | EH666031     |
| 37011 | 436 | 36 | 935  | CATACTCTTAGGTTTTGGAGAGGATTCATGGCAGCTTATTTCTTATGTTAACATCATG`  | 36015 | A_95_P025391 | TA13263_4097 |
| 37015 | 436 | 40 | 401  | TGTGAGACTGGCAAGTTGTGTTAGTGGATGGTTTTAATTCTGATTTGTGTAATAATT    | 36023 | A_95_P188872 | TA14666_4097 |
| 37018 | 436 | 43 | 688  | TTTGTGGCAGTACAGGGCAAGGGTACTCTGCTTTTTGATAATAATACAGATCTTTCCA   | 36029 | A_95_P269056 | DW003891     |
| 37020 | 436 | 45 | 1120 | TCAGTTGAGGATCTTACAAAGCCATTTGTTCCATGTACTTTGGCGCGGGCTATTTGG    | 36032 | A_95_P208552 | TA18993_4097 |
| 37030 | 436 | 55 | 293  | GAATGTTTAGCTTGATATTTTCTTACCTAGGAGGTGGGGATTTCTTTCTCAAATG.     | 36052 | A_95_P114082 | CV021434     |
| 37034 | 436 | 59 | 205  | ACATACTCTTCAGCGTTTGGGAGAGGATTCGTGGGGCTTATTTCTTATGTTAACATC    | 36060 | A_95_P104827 | CV017187     |
| 37036 | 436 | 61 | 654  | GTGTTTGCAACTCTACTGAGTTTGCACCTATTATACATTAATCTTGAGATGGAGAGTA   | 36064 | A_95_P250282 | FG644533     |
| 37037 | 436 | 62 | 1836 | GCTGCAGAGAAGTCCACTTTCCTTTCTGTTTTTATCTGAAGGAAAGAATTATTTTTCT   | 36065 | A_95_P022346 | TA15836_4097 |

|       |     |    |      |                                                              |       |              |              |
|-------|-----|----|------|--------------------------------------------------------------|-------|--------------|--------------|
| 37038 | 436 | 63 | 696  | CTGAATATATCTGTATCATATTTAGTGGGGAGAATGGCCTCCTCAGGGTGTGAAAG.    | 36067 | A_95_P234949 | EB446680     |
| 37040 | 436 | 65 | 1739 | TCTTGTCTGTGCCATGGGGGCTATAAATAACATCACAATTGTTTCACTGGGCCAAA     | 36071 | A_95_P187652 | TA14394_4097 |
| 37041 | 436 | 66 | 852  | CTGACGACATGCAAAGGAGCTCAAAGAGACAGTCGGTGCATGTATGATGAAAAGTG     | 36073 | A_95_P268031 | FG139523     |
| 37044 | 436 | 69 | 873  | TTGGGGTCTTGCTTCTCAAATGGTATATATAGATAGATCTTCTCTCCCTCTGCATTG    | 36079 | A_95_P228499 | EB449516     |
| 37053 | 436 | 78 | 766  | GCTTCTTTTGGTTTTGAAAAGCAAATGCAGTTTTTGGTTGTTGGATTCTTTAGGGATA.  | 36097 | A_95_P116492 | DV159243     |
| 37055 | 436 | 80 | 1521 | CACTTCAATATAGAAAGATGGATTTTGAAGAATTCTGCGCAGCTGCCTCAAGTGTTCA/  | 36101 | A_95_P024196 | TA17300_4097 |
| 37056 | 436 | 81 | 868  | CTCTCTGAGTGACGGGTCTCTTTGTTGTGACCAAAAACTTATACATTGTTGTACATG.   | 36103 | A_95_P269586 | EB425527     |
| 37058 | 436 | 83 | 883  | ACTTCGAGATGTGCTATAGTTTTCTCTAGTATATTATTGAAGCCGTCATCTTCTTGT    | 36107 | A_95_P115522 | DV157776     |
| 37059 | 436 | 84 | 869  | TAAGATGAGTTCTATGTTCTCGTCCCTGATTAGCAAATATGGGTGGGGATCCATCTGC   | 36109 | A_95_P272761 | EB677959     |
| 37062 | 437 | 2  | 721  | GTTGTACTAAGTTTTTGCACACAACATTAACCGTAATAAAACATACTCCCGTTAGC     | 36114 | A_95_P159722 | EH618175     |
| 37063 | 437 | 3  | 431  | TACTGTGTGCTTCTGGTTCACCTGATCGCCGAGATCCAAATTCATTTCTTATCATTGTC  | 36116 | A_95_P030201 | TA18314_4097 |
| 37065 | 437 | 5  | 858  | ATGCTGCTCTTTGCACTACGAACATGGAGGGAGGAGCTATCTCTGCATTATGATCTC    | 36120 | A_95_P269826 | FG167698     |
| 37067 | 437 | 7  | 855  | CAACAACCTTCTGTGGCTTCATCTTGAGAAATTTGCTGTACTATGTAAGCTAAAAGAT   | 36124 | A_95_P213707 | EB425095     |
| 37070 | 437 | 10 | 737  | GTGAGGCTATTGGTTTTTCTGCTGGTTTCTCCAGAGTTCCTTGTATGTATATTTAAA    | 36130 | A_95_P216467 | DV160776     |
| 37075 | 437 | 15 | 888  | ATCCTAGGGGCATAACTGCTGCTCATAACTGTACAATGATGGCTGTAGCACTTATTGC   | 36140 | A_95_P144362 | EB447728     |
| 37081 | 437 | 21 | 460  | AAATGGGAGGTGCCTCTGCCTAAGGTTAAAGTTGGAATAGTGGTCTTATTCTCATCTT   | 36152 | A_95_P147752 | EB643436     |
| 37084 | 437 | 24 | 248  | CCGGTAATATTTGATAGCACTTCAACGTCGAACATGGAGCTAGTAAGTCTGCTCAGTTC  | 36158 | A_95_P036833 | BP128838     |
| 37097 | 437 | 37 | 743  | TGTTATAATCTCATTATGTGGGACAGCTAATGATCCTGGTTGAGTTGAAAGTCTCTTA   | 36184 | A_95_P183232 | TA13411_4097 |
| 37104 | 437 | 44 | 1565 | CCTTTCGTGCACAGAACCAGGCATTATGAAATCATTTTCAACTCTTGGCATAAATATT   | 36198 | A_95_P202292 | TA17603_4097 |
| 37106 | 437 | 46 | 1649 | GCGAGTATATCAGTTATAGATAGCTATCCTTTTGTATGTCTTTCAACAACTCTATCCTT  | 36202 | A_95_P246857 | Z48977       |
| 37107 | 437 | 47 | 925  | GCACTTGAGTTTTGTGAAACAGCTGCAACACCACTCTTATCTTCTCATGTGTCAATA.   | 36204 | A_95_P009061 | EB425363     |
| 37111 | 437 | 51 | 129  | TTGCAACCTTTGGCTTTAAAACCAGCGGATAGGGATTGATCCATGTAGGTAGAAATG    | 36212 | A_95_P051371 | BP132629     |
| 37112 | 437 | 52 | 795  | GGACAGAGTTTACTATTGCAGTTAAAGACTCACCTGAGTTAGATGCCTCTGCCTTAGT   | 36214 | A_95_P272466 | EB450354     |
| 37124 | 437 | 64 | 1593 | GCACCTTGGATATTTACTAGCTTGAGTTGTTACTTTTTTTCAGTGTAAATTAAGTGGT   | 36238 | A_95_P009126 | TA16001_4097 |
| 37136 | 437 | 76 | 831  | GATAGTGTATTCGGGTTAGTTATTTACAACCATAGAAGTATGGCAATTAGTGTGCT     | 36262 | A_95_P212557 | TA19861_4097 |
| 37139 | 437 | 79 | 223  | TGGAACACTACAGTGGCATCTTCGATCAACTTGTACTAGCTGTAAGGAAATAAACTAT   | 36268 | A_95_P006466 | BP530900     |
| 37140 | 437 | 80 | 499  | GCTTCATTTAGTCCCTTGTAGTCATAAAACCATCATTGATATGAGTCGATGTAAGAT    | 36270 | A_95_P002761 | TA18656_4097 |
| 37142 | 437 | 82 | 529  | GCTCCTTTTCTTGCTGTACAGATTCCAGAACCAACTCCTTGTATCTCCCTTCTAGTC    | 36274 | A_95_P270171 | EB683413     |
| 37143 | 437 | 83 | 256  | AGTTGTGATCATTTTTTGGATTGTGTCTGCTCCTTAGTTTTAACATGGGTTTTCTTTTGC | 36276 | A_95_P144152 | EB447311     |
| 37146 | 438 | 1  | 536  | GCAGCTAAGCTTGAACGTGCTTTGGAGCTTGAAGGATGTCAAACCTTGGAACTGCAC    | 36113 | A_95_P064730 | BP136135     |
| 37150 | 438 | 5  | 1069 | GGAGTTGGAGCAGCTGCCTTGTGATTTGAATTATCTGAGTATAAGTTAATTGAGTT/    | 36121 | A_95_P203257 | TA17816_4097 |
| 37164 | 438 | 19 | 780  | CAATATATAGTTTTCTTTGACCCGGCAGCTGAGCTCTCAAGTATCATTCTGCAATATCT  | 36149 | A_95_P011281 | TA13548_4097 |
| 37165 | 438 | 20 | 445  | TTCCTACAAGGGTGTATTATTAATAAAAGTGAATTGGCAAATTACATGCACCTTGCCA   | 36151 | A_95_P068985 | BP137263     |
| 37168 | 438 | 23 | 575  | GTACCTTAGAATGGAAAGAAACGTGGTGGGAGAAAAGTATTGGACCGGATACAA/      | 36157 | A_95_P137562 | FG144128     |

|       |     |    |      |                                                              |       |              |              |
|-------|-----|----|------|--------------------------------------------------------------|-------|--------------|--------------|
| 37171 | 438 | 26 | 808  | TTTGTGACATTGCTAGTGATTGTATCTATGAATGTGTTGCTATGTTCCGTCATCTTGC   | 36163 | A_95_P220742 | EB440189     |
| 37177 | 438 | 32 | 1573 | TGCTCTGTAATGCATGATGATTTGGTGTTCGAGTTAAATCTAAGAGACTGTAATCTC    | 36175 | A_95_P009076 | TA14034_4097 |
| 37178 | 438 | 33 | 586  | TTCCCCCTCTCTGTAGTGAATATAATGGTGTGTAGTTATATGATTTTGTGTAGAATT/   | 36177 | A_95_P117762 | DV160709     |
| 37180 | 438 | 35 | 460  | CTTGAGGTCTCAAGTGCACGAAATACTTTATAGTGTGCAGTTAAGATCACTGCGTTCA/  | 36181 | A_95_P073110 | BP526131     |
| 37188 | 438 | 43 | 2095 | GGGCATATTTGCAGCTCCAAACTGGGTTTCGTTGAATATATTTACTCATAAAAGCAA    | 36197 | A_95_P240014 | X83524       |
| 37194 | 438 | 49 | 368  | GTCGGTGAAATCAAATATTTGCACTTTTGCCAGTTAAATGGAGAAAAAGAGATTAG     | 36209 | A_95_P183882 | TA13557_4097 |
| 37197 | 438 | 52 | 1114 | TGGTCTGATTATGTAATTTAGACCTAGGTTTGCTATGTACTGTGTACTTAGGCGGCCG   | 36215 | A_95_P238834 | AJ414051     |
| 37198 | 438 | 53 | 1585 | CAAGGGAGAGTGTACCAACAACCTGAAATGCTTAATACATCAAGTACGAACTTAATTT,  | 36217 | A_95_P210082 | AY570725     |
| 37199 | 438 | 54 | 730  | TATTACGAAATGCTGGTTGTTGAACTTTCTTTTCGCAATGTAAGCATGTTGTTTCTCCA  | 36219 | A_95_P151607 | EB681849     |
| 37202 | 438 | 57 | 837  | AATTTTGGTTGTTGTCTTGGTTCTCTCCACTCTCGGGGCACTATGCTGCTCAAGATCA/  | 36225 | A_95_P219112 | TA21329_4097 |
| 37204 | 438 | 59 | 486  | GCACTGATATTATCGACCAAATAAACCGCACCTCAAATTTGTATAGTCAAGACCCTGA   | 36229 | A_95_P124157 | DW003998     |
| 37207 | 438 | 62 | 612  | GTTACCAAATGAGAACACATCTCTGTTGGAACCTCAGCATCAGTTGGATCCTTTGACCA  | 36235 | A_95_P053496 | BP133193     |
| 37215 | 438 | 70 | 689  | CTGGGAAGTTCATCCTGGTCTAACATATTGAAAACATGACTTGTTCTTACTGTCAATT   | 36251 | A_95_P118127 | DV161142     |
| 37216 | 438 | 71 | 1322 | GAGTGATTTTGTGTGTGTATAAGAGCAAACGATTGAATAAAGGGAATTTTACCTCTC    | 36253 | A_95_P239369 | AF211536     |
| 37217 | 438 | 72 | 446  | GTACCTCTAACGATAGTGTTAATGGTGTAAAGCTGTTCTTTTCTATGTACTCTGATA/   | 36255 | A_95_P022966 | DW003209     |
| 37223 | 438 | 78 | 234  | CGGCTTGGCTCTTGCAGCATTTTTGGTAAAGAAATTCAGAAATAGCTAGATTTACAAG   | 36267 | A_95_P218427 | TA21172_4097 |
| 37225 | 438 | 80 | 763  | AAAGTCTCGCCATCTGAAAAAACTAAGCTTCAGAACGGAAGTACATCCTGGGAAC      | 36271 | A_95_P215762 | TA20559_4097 |
| 37226 | 438 | 81 | 1273 | GATCTGATGTCATTGGAAGATATTGATGTGTAAGCTTCTGTATGATTCTGTAATAG     | 36273 | A_95_P210812 | TA19475_4097 |
| 37227 | 438 | 82 | 521  | GAGCCTTTACTTGTTTTTCATCAGTTTACTGCAAAATCTTGACGACCAGTGCAGCAAAA  | 36275 | A_95_P288823 | FG643580     |
| 37233 | 439 | 3  | 519  | TGGTTTCAGTGTCTCATCAACTTTGTCAAAATATGCCTGAGGTTTTCCAGTTACATTG/  | 36286 | A_95_P103447 | DW005235     |
| 37234 | 439 | 4  | 1618 | GTAGAGGAGCAATATTGAGTTTTCTTTCAGGTTATGGCTTGATTTGTATTTTTGTATCT( | 36288 | A_95_P018326 | TA14549_4097 |
| 37248 | 439 | 18 | 854  | AAGCAGTGGTGTGAGAAGTTCGCGCTTTTCTTCTTCTATATGCGACTTTCATTCTCTCC  | 36315 | A_95_P296728 | EB679151     |
| 37249 | 439 | 19 | 674  | CCATGCGTATCAGAATCTGGTTCTGACATATACAGTAAGCGAGAAGTGATACAAAAG    | 36317 | A_95_P136867 | EB440575     |
| 37251 | 439 | 21 | 580  | GTGCCATAATAATTCCACACAGGTTCCCTGTTTTGTTTGAAGGAAATTCTCAAGAGG    | 36321 | A_95_P260726 | BP129674     |
| 37254 | 439 | 24 | 267  | AATGCATTAGGTGCATAAGTGCATGTATGCTTTAGACTTGGTAACGTGTATGTATAG`   | 36326 | A_95_P098998 | BP534725     |
| 37256 | 439 | 26 | 398  | TCTAGTGAAAAAGAAAAAGATGGGAGATATTGGCATTGAGGGGGAGGGGGGCC/       | 36330 | A_95_P164982 | EH624444     |
| 37259 | 439 | 29 | 918  | CCTACCAGAAAAGTATGTCAAAATTGTTTTACGGTGAATTGCTCTATACTACGTTCCA`  | 36336 | A_95_P148702 | EB430421     |
| 37264 | 439 | 34 | 859  | AATTTGGGGTTTCTGGAAAGGTGTTTTCCGACGTTAATCATGGTAAGCAATCCTTCT    | 36346 | A_95_P232374 | DW000853     |
| 37266 | 439 | 36 | 692  | TATGTGGGGCTTGCAGTGAACCTATGCATCTGACGAATTCGGATCTGCTGTGACA      | 36350 | A_95_P275648 | FG643795     |
| 37267 | 439 | 37 | 678  | GAGTTTTCTAGTCGGAGCAGAGATTTATATGCTAGTAGAATATACAGAGACTTCTTG`   | 36352 | A_95_P014521 | DV162558     |
| 37268 | 439 | 38 | 861  | AATGCTGCTATGTTTGGTATGTACGAAGCACTAAAGCAGTACTTTGCAGGAGGCACA    | 36354 | A_95_P150527 | DW000396     |
| 37270 | 439 | 40 | 508  | TTGTACTTAGAGGCTCATGACTAGTGACACCAGATTCCGGCTTTATTAGTGTATCTTC   | 36358 | A_95_P147757 | EB643437     |
| 37271 | 439 | 41 | 467  | GGGAGATGAAGATGAGTTTTACAAATTAGTTATAAGATCTCCGAAATTGAGTGTCA     | 36360 | A_95_P274493 | AM793040     |
| 37276 | 439 | 46 | 712  | GGAGTCTACTTCGCATAATGTTGACTTTTCATGCCTTGATGTTTTTATATAAAGGGTA   | 36370 | A_95_P271641 | EB444516     |

|       |     |    |      |                                                             |       |                           |
|-------|-----|----|------|-------------------------------------------------------------|-------|---------------------------|
| 37279 | 439 | 49 | 757  | GAAAATATTTTTGCCAATCAAATGCTCTTTGGGAGTGATGGAGAATGTGCTGGGTTT   | 36376 | A_95_P145457 EB449230     |
| 37281 | 439 | 51 | 278  | GTGAACAAATTAATCTTAATTAAGCAGAGATGGATGGGTGTTAGCCTTTTATGGCT    | 36380 | A_95_P002471 EH620447     |
| 37286 | 439 | 56 | 480  | GTGTACCAATGTATGTATGTCTGCATCTATATGAGAAAGGGAGTTGTATTTGACTAA   | 36390 | A_95_P122762 DW002723     |
| 37287 | 439 | 57 | 531  | GAACAGGTGCCTAGTGACACCTTTTTAAGACTTTGTAATGTGATATGACTTTTGTGTT  | 36392 | A_95_P108357 TA13937_4097 |
| 37289 | 439 | 59 | 868  | CGTAGAATTGAAGCTGTTTTCCGCCAGTACGGTTTCAAAAAGATTTTATGCAATTTCT  | 36396 | A_95_P204797 DV999368     |
| 37295 | 439 | 65 | 475  | ATATTCTGCTGGTTTCTCATATTTCTAGCTGTGCTAGTGAATCTTGAATCCGAGTTT   | 36408 | A_95_P047411 FG644329     |
| 37301 | 439 | 71 | 532  | AGTTATCTAATGACATTGTGTTCTATGGTTCTTTGACTCACTTGTCTCATTTGGTAT   | 36420 | A_95_P180857 TA12842_4097 |
| 37303 | 439 | 73 | 1729 | CTCGATGAGAAGTAAGATTTTCGTCCGTATAGGAGAAATATATCTGCATGTAATAAT   | 36424 | A_95_P191672 AJ001769     |
| 37305 | 439 | 75 | 815  | TTGGTTCTCTTTAGTGGGCTTTTTCTGGGCATTTTAAATTTTGTGCTGGAAACCTGTT  | 36428 | A_95_P018571 DW004647     |
| 37306 | 439 | 76 | 862  | TTTACTCAGCACTACTACGGCTTCTGCTGTAGTATTGGGTCTAGTTCTCCCGTACTGA  | 36430 | A_95_P287508 FG169764     |
| 37307 | 439 | 77 | 932  | TTCACAATTGCCCTTGATTTGGGATGAAGTTGGTTGTATTGTGTGATGCTGTTGGGG   | 36432 | A_95_P023341 TA13320_4097 |
| 37308 | 439 | 78 | 457  | CGAGTTTGAAATCGATATGGATTTTGACTTACCTCTGGCAATCTTGTATAGTAGT     | 36434 | A_95_P261596 AM829948     |
| 37309 | 439 | 79 | 179  | GCTCGTAATTTGTTGTTGTAGACGATTCACAGTGCAGCAATAAAGGTCAATTTCTGAC  | 36436 | A_95_P095393 BP533176     |
| 37310 | 439 | 80 | 99   | ACTTCATTGATGATAGTGGTGTGGATCCAGCTGACAGGTATGGAAGTGACAATGAAC   | 36438 | A_95_P128732 EH665155     |
| 37312 | 439 | 82 | 745  | CCAATTTAAGGAAAGGATTTTGGTTGTCCTCAACTTGGGAAAACATATTGACGTTGA   | 36442 | A_95_P115887 EB678058     |
| 37314 | 439 | 84 | 62   | CAGAACATTAATTGCGAGTATCATTCTTACATCAGACTTATTCACCAGGCCAAAAAG   | 36446 | A_95_P032136 CV020812     |
| 37325 | 440 | 10 | 1048 | CACTTGCAATCATCATCATCTTTGTGTTAAGGGAGGAATGTTTAAATTTAAGAACA    | 36301 | A_95_P211702 TA19672_4097 |
| 37330 | 440 | 15 | 490  | TTCGCAATCAACTATGGAGTTTGATCGAGTTTGCCGTGGAGTTGAAGCTGTCTTTCC   | 36311 | A_95_P084125 BP528938     |
| 37335 | 440 | 20 | 458  | AATATGATTCTGAACTGCAGAAGCTTGACAAAGATTTCCATGGGGTTTATTTAGAG    | 36320 | A_95_P279118 AM793251     |
| 37337 | 440 | 22 | 756  | TGTGGAATAATCTGGAAGTGGATGCTAATGTTCCAAAGTTTCAATAATGGAGTTCTG   | 36323 | A_95_P019806 TA19050_4097 |
| 37338 | 440 | 23 | 728  | AACTGTTTCTTAATGTTATAATCTCATTATGTGGGACAGCTAATGATCCTGGTTGAGT  | 36325 | A_95_P234659 EB439771     |
| 37339 | 440 | 24 | 91   | GTTTTGCTGTGCACAGTTTGTAACCTTAGGTCTGTCTTCTAAATTATGTGTTACTTAG  | 36327 | A_95_P140512 EB444408     |
| 37340 | 440 | 25 | 829  | GACAACACCTTTTTCTGCTTTCTTCGTACCATGTTTCTTGCTTTTCTTGTGGTGATGCA | 36329 | A_95_P200057 TA17127_4097 |
| 37344 | 440 | 29 | 596  | TGGGCACTTAAGGTTCTGCTGTAGTGCGGCATTGTTAGGATTTAGTTGAGAGAAGAT   | 36337 | A_95_P058536 BP134498     |
| 37348 | 440 | 33 | 266  | AAATTTGCTTCTTGTGATCTGCCATTGCGCTAGTTACAAGCTGAATCATGGTCGCT    | 36345 | A_95_P241865 AJ718686     |
| 37350 | 440 | 35 | 627  | TTTTGAGGCAAAAAGCCGGAGTCAAATAGTTGAAAGAGGTGGATGTCATACTGGTT    | 36349 | A_95_P260676 BP129537     |
| 37351 | 440 | 36 | 773  | CATGGTCAGGTTATGGAGAAAAAATTAAGTACGATGGCTCGAGAGCTTGAAAAACT    | 36351 | A_95_P149417 TA16716_4097 |
| 37352 | 440 | 37 | 1338 | GCCAGTGTTATCAGTTTGAAAAATGATGGATTTTTTGTATTGGGATCAAAAAGAAGAG  | 36353 | A_95_P190242 TA14968_4097 |
| 37355 | 440 | 40 | 663  | GCTTTCTTTTCTTGACCGTGTATGGTTCTAGCACTAAATGATGTACCATTTGGAAAT   | 36359 | A_95_P129862 EB429802     |
| 37356 | 440 | 41 | 769  | TCTTAGCAATCAAGAAGCAGTTGATATCGTCCAAAATAGCTCTCACAGCGGAAGTGC   | 36361 | A_95_P117857 DV160831     |
| 37357 | 440 | 42 | 675  | GACCCGAATATCTGAGCTGCATATTGTTTCTTGTATATTTGCAATTGGTTGGATTT    | 36363 | A_95_P190862 TA15105_4097 |
| 37369 | 440 | 54 | 762  | CTTCAATGAGTTCGCACCTACAAAAGAAGTTGTTTTGGATCATCTTATTGAGTTAT    | 36387 | A_95_P247262 EB679649     |
| 37372 | 440 | 57 | 890  | TGTGTTATCATATATGACATTAGCAAGCCAGCTTCCGAACCGAATCACGATTAAGGA   | 36393 | A_95_P013676 DV162033     |
| 37375 | 440 | 60 | 471  | CAGCAGCTTTGTTCTAGTTCTTCTTCTTAAGGTCTTGATATTGTAATTTCTCATTGCAG | 36399 | A_95_P002496 TA12411_4097 |

|       |     |    |      |                                                             |       |              |              |
|-------|-----|----|------|-------------------------------------------------------------|-------|--------------|--------------|
| 37390 | 440 | 75 | 837  | ACTGTGTCCATTGGTGCTTGCCTGGTCCTATTGATTCTTGGGCTGATTTCTGTTTCAT  | 36429 | A_95_P146037 | EB449864     |
| 37400 | 440 | 85 | 413  | CTTGTCTAGCGGAATAGAATTCTAACTGTTTGTGCTAACAGAAAATAGATTCTTTGAC  | 36449 | A_95_P207397 | TA18732_4097 |
| 37403 | 441 | 3  | 796  | GAGACTATAAAATGATATGAGTGGTGGCTCTCTGTACTTTGTTTCATGTTTTAGTCTAA | 36453 | A_95_P018426 | TA13873_4097 |
| 37407 | 441 | 7  | 910  | CGATTCTTGTGATAGAACTGGCTATGCTGGAAAAATGAAATTAGTCTAATGTCTCT    | 36461 | A_95_P017006 | TC45123      |
| 37410 | 441 | 10 | 491  | GGTACACACCAAAGATTGGTACCCCTACTTGTGGAAACGATCAAATTAATTGATTTAT  | 36467 | A_95_P164442 | EH623689     |
| 37412 | 441 | 12 | 764  | CTTGTGCATGCTTTTATCGGTGATTGGGATTGTACTACTTGTTCAGTTATATATATG   | 36471 | A_95_P117197 | DV160019     |
| 37414 | 441 | 14 | 833  | CCTCTCTGAAAAGTGCTAAAAAACAGAGAGCAGCTTGATTCTTGTATTATTGACTAA   | 36475 | A_95_P195692 | EB425651     |
| 37416 | 441 | 16 | 821  | TCCATAGTTACAAGTAGGTCAATTTTGGATGAGTGTCTTTCCAGTAAGTTTTGTCGC   | 36479 | A_95_P008246 | EB679495     |
| 37421 | 441 | 21 | 529  | TACCTACTGGTGATAGGGTCTTTTGCCTAGTATTGCTCGCCTTTGTAAGCTGAATT    | 36489 | A_95_P193178 | TA15615_4097 |
| 37422 | 441 | 22 | 183  | AATATGGGAGAGTACGAGATGTGGATATGAAGCACGACTATGCATTCGTAGAATTT/   | 36491 | A_95_P161817 | TA13397_4097 |
| 37424 | 441 | 24 | 352  | ACGGAAACTGTAAAAGCTACTACGAGTTGATAGATGGATGTTCCGTTTATGAACTA    | 36495 | A_95_P043446 | BP130617     |
| 37426 | 441 | 26 | 435  | TGGCCCTTCGAGCTTGATATTGTTCAATTGTTATTACATGTATGACCAATTTCTCTC   | 36498 | A_95_P108337 | TA13278_4097 |
| 37429 | 441 | 29 | 202  | CTTTCTGTAAATATCCAAAAGTAACCTATCCGTAGGGAGAAAGGAGTACAAAATTG    | 36504 | A_95_P131362 | EB431540     |
| 37440 | 441 | 40 | 412  | GTTGAAGTTGTTATTGAGTTTGAAGTCTAGATTACATTGTAACATTACCGAGAG      | 36526 | A_95_P013151 | TA15069_4097 |
| 37447 | 441 | 47 | 869  | CCTTGATAAGTTGAAGGACTCAAAGAAGAGCGATGATGACTCCAAAAGCAGCATGC    | 36540 | A_95_P290053 | DV161861     |
| 37448 | 441 | 48 | 589  | GGACATCACTGTTTCTTTTCTATGTTGGTGTGTTTATTGAGTAAAAGGAAAGAAGTT   | 36542 | A_95_P112367 | EB437303     |
| 37449 | 441 | 49 | 317  | ATATCCCTTTCCCTCCTTGGTATTTAATGTAGAATTGGTTAGAGCAGGACCTTATT    | 36544 | A_95_P089893 | BP530701     |
| 37453 | 441 | 53 | 163  | CTGTTTACACTGACCAGAAGATAGCTGTTAGCTGTGACAACACGACTAAATCTGTCTC  | 36552 | A_95_P131897 | EB432316     |
| 37459 | 441 | 59 | 341  | GTACAATATAGCTGAAAATGCAGAGGTGGTGTGCTAGATATTTTGTATGCACTAA     | 36564 | A_95_P131687 | EB432061     |
| 37461 | 441 | 61 | 905  | TCAGGAAAATCAAACGTCTGTAGCTTACCATAGATTTGTAATGTATATGGTTGCAG/   | 36568 | A_95_P211382 | TA19598_4097 |
| 37463 | 441 | 63 | 761  | TAAGCAGCAGCTAAGGTCCATCTCTTTATTCTTATTACCTCTTCAATTTGGTGATAT   | 36572 | A_95_P218992 | EB678537     |
| 37464 | 441 | 64 | 848  | TCTTGTTTCGTAATTCAGTAGCGGTCAACCAATCAAATCAATAGTTCCTTCAAG      | 36574 | A_95_P289658 | DV160388     |
| 37466 | 441 | 66 | 1518 | TTTTCAGATATTCTGTAGGCTGACCTTGAAATTGTGACGTTTACCGGTTTTTCTTGGCT | 36578 | A_95_P031821 | TA18075_4097 |
| 37467 | 441 | 67 | 948  | GAGGCTGGATGGAAGTCAAATGATCAGTCTGTTTGGATTGTAACCTTAAATCTT      | 36580 | A_95_P018616 | TA16502_4097 |
| 37468 | 441 | 68 | 142  | GTGACCAAGATCATATGTCACGACTGAAAAACATTACTGAAAAATATATCACGATT    | 36582 | A_95_P096108 | BP533477     |
| 37478 | 441 | 78 | 563  | GTCTAGCAGTTATAAGCGGAGAATTTTGTGAACTTTTTCATTTGGATTGATTGTACA   | 36602 | A_95_P062785 | BP135605     |
| 37482 | 441 | 82 | 143  | GGTTGGTAGTGCTTGTATACCTATATGTATCTTCTTCATGTAACCTCAAGCTTTTCTC  | 36610 | A_95_P033664 | AJ632885     |
| 37488 | 442 | 3  | 0    | TTTGTAGGCATATGGAACCTTGTGCTAGTTGTAGAAAATGATTTTCAAAGTCTTGCG   | 36454 | A_95_P027056 | A_95_P027056 |
| 37492 | 442 | 7  | 458  | GTATACTTAAGTTGATCCTGCTGGGTTGAACTTTATTCTTACAGTAATCATGAAATGC  | 36462 | A_95_P103782 | CV016686     |
| 37493 | 442 | 8  | 494  | CTATGCCTCACAAGGAAAGACTTTTCAAGTCTGCTGCTGCGATCCAGAAAAGAG/     | 36464 | A_95_P146537 | EB450598     |
| 37499 | 442 | 14 | 578  | CTGTAAAGTAATAAATATCTATTAATGTGTGGTATGGTTGACAAGGGACCCTGCTGC   | 36476 | A_95_P124582 | DW004371     |
| 37506 | 442 | 21 | 825  | TTAGGAGATAGCGGATTTATGTTGGTTAGACATGGATATGCCGCATTTAAATCCCTC   | 36490 | A_95_P019666 | TA20369_4097 |
| 37507 | 442 | 22 | 750  | CCGTTGAGTTCTTTCATCAGATACATGCTGAAGATTTCTTCTTGTGAAGAAATTCAC/  | 36492 | A_95_P013196 | Y09109       |
| 37508 | 442 | 23 | 820  | CCCCTTGTGAGAGTATACCGGTTTTACTGTTGTAATTGATGCTAGTTTATAGTA      | 36494 | A_95_P219772 | TA21465_4097 |

|       |     |    |      |                                                              |       |              |              |
|-------|-----|----|------|--------------------------------------------------------------|-------|--------------|--------------|
| 37511 | 442 | 26 | 609  | CACTTTGTAAAGTACCAGCTTCCAGCTTTGGGTGATTCTGGTTAATTCTTTAAGAAA/   | 36499 | A_95_P051141 | AB195174     |
| 37513 | 442 | 28 | 462  | CTTGCAACATTGTAGCTGCGTGGAATTTTGGAGCCATGATCATTATGAACTTATTGA    | 36503 | A_95_P214777 | BP131286     |
| 37514 | 442 | 29 | 1362 | ACTGAAGCTGATCCAAGATGCCCCAATGCAAGAGCACTACTACTAGGAAGATGACT     | 36505 | A_95_P239544 | AY776171     |
| 37515 | 442 | 30 | 577  | AAGTAAGATGATTCTGGATGAGTGGAAGAGGCTTTACTCCAACACCAAGACCAACTT    | 36507 | A_95_P144357 | TA12453_4097 |
| 37517 | 442 | 32 | 838  | AATTTTCGACATGTGTGTCGAAGATTTAATGAAGGATTGGAGTCTAGGTTCCAGACCAT  | 36511 | A_95_P313173 | FG155239     |
| 37519 | 442 | 34 | 366  | AAAGATTCAAAGAAGCAGCAATAACATGGCACATTGTGGTCTGTATTTGAAGTTTAT/   | 36515 | A_95_P087153 | BP529724     |
| 37520 | 442 | 35 | 823  | CAGACTCCACTTGTGGTAATATACTGGGTTTGTGTTGTTGTTGTTGTAATGTTAGTTCA/ | 36517 | A_95_P194597 | TA15929_4097 |
| 37521 | 442 | 36 | 493  | GCATTGCACTGTAGCACCAGATTGATGAAAATTGAAACCGTGAAGTTTCTGATGATT/   | 36519 | A_95_P099048 | BP534747     |
| 37522 | 442 | 37 | 825  | AATAGACGAACGCAGAAATTTGAGCCCTATTGAAGAAAATGGCCGCAGTCACAGCA/    | 36521 | A_95_P232239 | EB677939     |
| 37531 | 442 | 46 | 674  | TACAGGGAAGTGGCATTAGAGTGGCTTATTATTATAAGAGATCTCCGAGTTCTGTGC    | 36539 | A_95_P129592 | EB429581     |
| 37533 | 442 | 48 | 944  | CAATTTAGCAGTTCTCCTTTTGGGGAACAACTCTTCTAAGTGCATACTATCAGTTGAT/  | 36543 | A_95_P204432 | TA18065_4097 |
| 37534 | 442 | 49 | 240  | TTTGTTAGGGCTTCAGATTTGAGTGATGATGATCTTAAGACGTATGCTAAAAGAAGG    | 36545 | A_95_P109997 | FG635113     |
| 37538 | 442 | 53 | 867  | GAAGTCACGAAAGATAATGAAGAGCCTTTGGATGAAGATGATCTGACCTAACTTTC     | 36553 | A_95_P204252 | DV999565     |
| 37554 | 442 | 69 | 391  | TTGGGCACACAATGTTACGCACTCAGTCAGTGTCTTGTAAAGTGTATAAAGAATTCT    | 36585 | A_95_P141742 | EB445392     |
| 37564 | 442 | 79 | 845  | TGCAAAAAGGTCAAATGAGTGATTGGAGCCAGAAATGCTGATGGTTTGTCTGCAGTT(   | 36605 | A_95_P116002 | EB643439     |
| 37565 | 442 | 80 | 717  | GACTATTCAATTCTAGTTAGCGAGCACATTGTGGTCAATCACAATAGTTTGCATTTGT.  | 36607 | A_95_P111302 | TA15727_4097 |
| 37570 | 442 | 85 | 467  | GTGGAATAACAACATTTAGTATGTATCTGAAAAATGCGGCAACATATTGTGAGCTG     | 36617 | A_95_P264526 | AM800056     |
| 37577 | 443 | 7  | 703  | CCTTTTCTCATGTAAAACATGAAAAGTTGGTTAAAGCTGACTAGCTGAGATTGGTTTC   | 36630 | A_95_P192577 | TA15482_4097 |
| 37581 | 443 | 11 | 882  | CCATGGAAATTGTAATTTGGCATTGTAAATTATTTCGCATGGATCTTCTATCTGGCTTC/ | 36638 | A_95_P011551 | TA13838_4097 |
| 37587 | 443 | 17 | 1164 | TTCGTCATGGTAGAATTGGGTAATGTAGAGTTAATGTCCACAATTGTTCTCATTGATG   | 36650 | A_95_P229649 | TA14879_4097 |
| 37592 | 443 | 22 | 725  | GTATGCAGTGTTATTCCTACCTTACGAAGGTAGAGAGGTTATATTTTTCTTTTAAACG   | 36660 | A_95_P152707 | EB683051     |
| 37594 | 443 | 24 | 614  | AGCCTGTTGTAGTTAAATACAGGCCCATCTGAATCTGTAGTTATAGAGTGATAATTCT   | 36664 | A_95_P262596 | FG638898     |
| 37601 | 443 | 31 | 523  | ACTTGTCTATTTGTAGAAATTCTCCACCTCCCTTCTCCTTTGGTTGAGGTATTTCTC    | 36678 | A_95_P035478 | BP128480     |
| 37607 | 443 | 37 | 914  | AACATGAATGCTCAGGTAGTCTTACAAGTCCCGGCTTATCGGTGCTGATGTTTGT(     | 36690 | A_95_P247197 | EB680319     |
| 37608 | 443 | 38 | 762  | CTGCCTTACTCCACCGTATATTTGGAAGTTGAGAAGCTTAAGAAGTCTTTTGGAAATTT  | 36692 | A_95_P292143 | EB426653     |
| 37609 | 443 | 39 | 816  | GACAGTGGATGACATGGTCAAGCAGAATCAACGTCTCGTAGTCTTACCTCTAAATC/    | 36694 | A_95_P127407 | EB426943     |
| 37610 | 443 | 40 | 663  | GTTCTTGGTAACCATCTTGTTTACTTGGTAACATTTATTGGTCACTTCTGTGTTGAATG  | 36696 | A_95_P122202 | DV162480     |
| 37613 | 443 | 43 | 823  | GGAAGGGAACGATAACTTCTTGTAAACAGAGATAGATTCAAGTTTCTTTTGCATATGG   | 36701 | A_95_P187092 | TA14270_4097 |
| 37618 | 443 | 48 | 900  | GAGGCTGAGATGGCATATTAAGAAAATGCATCTTACATGTAGCCTTAAACTGTTCT/    | 36710 | A_95_P186902 | TA14227_4097 |
| 37623 | 443 | 53 | 1420 | CTTATTATGTCTGGAAGGACTGTATCTTGTACAATTGAGGGATTCATTGAATCGT      | 36720 | A_95_P190887 | TA15110_4097 |
| 37624 | 443 | 54 | 1800 | CTCTACTTCTCAGTTCTGTTGTGCAAGTGTGAATTATCTATCTGTTAGTTCCCTTTC    | 36722 | A_95_P192843 | TA15543_4097 |
| 37626 | 443 | 56 | 836  | AGTGCTCAGCCTAGCTAGAAAATATCTTGTATTTATGGTGGTTTGAAGTGTATGATCTG  | 36726 | A_95_P251242 | TC58481      |
| 37628 | 443 | 58 | 309  | CCAAGTCCTGTTTTGACTTTCGCTTCCGGAATTTCTGTTCCGGAATTTGGTTAAACATT  | 36730 | A_95_P213167 | EH613891     |
| 37630 | 443 | 60 | 1402 | CCTTGTTCTGATCGCCATGATTTATCCAAGAATTATCAGAGTCTGCTGCTCCTCTTT    | 36734 | A_95_P192447 | TA15453_4097 |

|       |     |    |      |                                                              |       |                           |
|-------|-----|----|------|--------------------------------------------------------------|-------|---------------------------|
| 37636 | 443 | 66 | 1731 | CGCTATCTGTCATGTCATTATATTTTTCCAGTTATGTTACCTAGTTCTAATGTGTGTAC( | 36745 | A_95_P016256 TA14638_4097 |
| 37639 | 443 | 69 | 138  | GACTTTGTTAGAGATTGGTGAATTCCAATACCATCTATGTTTATAATCGGATTGTGAG   | 36751 | A_95_P162662 EH621663     |
| 37645 | 443 | 75 | 518  | TTAGTTCCCATGATGTGAAATTACAAAAGACTTTTGCTATGCAAGGTGACAGAAGAT(   | 36763 | A_95_P027896 TC70724      |
| 37652 | 443 | 82 | 878  | CTGCGAAATTGTGCCTTTTGTTCATCAATTGTATGGTAATGTTGGGATATTTACTTTC   | 36777 | A_95_P115507 TA15437_4097 |
| 37655 | 443 | 85 | 543  | GGTGTGTGAATGGAGAACAACCTTTTTGCTACGCGCAACCAATGTTTTGATATGAAAT/  | 36783 | A_95_P252719 EB436472     |
| 37656 | 444 | 1  | 415  | TGGGTTATCTTGCATTCATTTTTAAGCTGGCTCCTCAAATGTATGATTTTCCATGAAGT  | 36619 | A_95_P109497 CV019339     |
| 37659 | 444 | 4  | 261  | TGCTTGTTAGACTTAGATGGCTCTGTAATCTCTGAAGTTTCTTTTACCTGAAATGCTT   | 36625 | A_95_P099363 BP534899     |
| 37664 | 444 | 9  | 632  | TTTGAATGATCGAATCATTAAATTCATGAATCTATGAGGCTGTGTTATTTGCCTCGGT   | 36635 | A_95_P020696 TA13064_4097 |
| 37665 | 444 | 10 | 776  | GGTCCAAGGTTGAGTGGAAACATGTAATACATGTGTACACCACCAAATCTTTCGTAA`   | 36637 | A_95_P248637 FG163565     |
| 37666 | 444 | 11 | 488  | ACCGCACAGAATCTGCAAATCATGTAGAGAAAGGTTTATCTTTCCAGGCTTATGATT    | 36639 | A_95_P147787 EB643451     |
| 37668 | 444 | 13 | 661  | GACCAACTTGTTCAAGAATATTCTTCAGGATTCTCGGACCATTGCAAGTTAGATTTTC   | 36643 | A_95_P005186 FG639256     |
| 37669 | 444 | 14 | 877  | ACCATGCACGCTACGTAATGCATACTTTGAACAGCTCGTCAGCATACTATGGTACAGC   | 36645 | A_95_P232819 FG159402     |
| 37670 | 444 | 15 | 1399 | GCTTGAGGGAGAAATGAGCAAGCCAAGGAACCAAAAATTTTGAAATATATCATTCT     | 36647 | A_95_P239129 AF520810     |
| 37677 | 444 | 22 | 816  | CAAGCTACACAATAGTTTATCTGAATAGCAGATAACACCCTTTTGGAAATCCTCCAATG  | 36661 | A_95_P010491 TA18174_4097 |
| 37679 | 444 | 24 | 431  | TGATGTAAACGAGTTGAGAATTGGGTTGAGAAACTTGGCCATCAAATTCCTGAAAG     | 36665 | A_95_P034853 DV162604     |
| 37686 | 444 | 31 | 248  | TTTATTCGCTATTCTTGTGTTGAACTAGGAATTCTGAATTGCTGAGCTCGCTAATG     | 36679 | A_95_P006541 EB429322     |
| 37696 | 444 | 41 | 420  | TCACAAACCCGATAACGGAACCAACAGGATTAAGCTGCCTTCAGGATCCAAGAAGAT    | 36698 | A_95_P022451 X62500       |
| 37707 | 444 | 52 | 778  | CTAAAGCCATATGTTGTGGCAGACCCAGAGATTCAGGAAGAAGAAATTGATGGTGT/    | 36719 | A_95_P157642 EH615696     |
| 37711 | 444 | 56 | 212  | TAAGGCAATTGCTGCTGCATTATTGTTTTCTATGGTAATTGACATCTGAATTGGTGC    | 36727 | A_95_P092373 BP531775     |
| 37714 | 444 | 59 | 819  | TATTTCATAGCTATCTATTTGACAATCAGACCCTATGAGCTCGTCGACGACGGCGC     | 36733 | A_95_P289178 FG136073     |
| 37717 | 444 | 62 | 430  | GAGCAGGCCATGAAGAGAGATGTCAGGATGAAATACTTTCTGTAAACTACTTTTTTG`   | 14301 | A_95_P000096 EH619820     |
| 37721 | 444 | 66 | 418  | GTATTTGTAAGACCATTTTTGCGTTTTTACTTTATTCCCCTGTGCCATATATTGGA(    | 36746 | A_95_P188142 TA14504_4097 |
| 37722 | 444 | 67 | 243  | GTAAGTGTGATTGTAAGCCTTCTGCAAATCCTGTCAATTTGACTTCTATGTATTCTAG   | 36748 | A_95_P118897 DV161972     |
| 37723 | 444 | 68 | 99   | TTGGTTTGTGAATACAAATGAAACAATGAACGAAGACCTGTGTCTATTTTCTTCTCGT   | 36750 | A_95_P103382 CV016480     |
| 37727 | 444 | 72 | 410  | TTATTGGCATGATCACTCGAAAGATCTGATACTTAAGGATAATGATGATCCGGCGGC    | 36758 | A_95_P035293 EB678111     |
| 37728 | 444 | 73 | 1216 | TAAAACCTGAGAGAGTTTTAAGAGCTCGTGCAAGACGAGGAGTCAATTGCCATGGT(    | 36760 | A_95_P017281 DQ213015     |
| 37730 | 444 | 75 | 827  | TGTGACAGTTACCAAGACACATCATACTATGCCTTCTGCCAGTGATAAAAATTCGT     | 36764 | A_95_P151782 EB682029     |
| 37735 | 444 | 80 | 786  | GAGTTTGGTTAATGAAACTGGTCAACCAGATAAATGAATGCAAGTTATGCATGTTGCA   | 36774 | A_95_P020561 TC56361      |
| 37736 | 444 | 81 | 841  | TTACAGCCACTGTTCTTTTGGCTCGTGAACCTGTTGAACATTTGAGAGGTTGAAATAT   | 36776 | A_95_P121977 DW002045     |
| 37737 | 444 | 82 | 432  | ATAGTTTTCTGGCGAACTCCTTCCCCTCGTTTTTGTACTGTCACTGTTTTCTGTGATGA  | 36778 | A_95_P107967 EH617488     |
| 37738 | 444 | 83 | 569  | AAGCAATTACCCTGGAAGCAAGCAAAAACCTATGAGAAGGCAAGTCCAGACTCCTT     | 36780 | A_95_P221522 FG140103     |
| 37740 | 444 | 85 | 767  | GGCTGTGAAGTGCTTGTGCTTATTCATCATTGATGTATTATTGTTCTATTATAGCAAG/  | 36784 | A_95_P135012 EB438104     |
| 37742 | 445 | 2  | 544  | AAGTTATATGAAGTTATGTGCCCATGAGATACAAAGTACTTGAGGAAATGAAGAG(     | 36787 | A_95_P073855 BP526318     |
| 37744 | 445 | 4  | 1795 | GTAAGTGGTAGTTGTTGCATAAGCTTGTGTTTCTCTGTTTCATGATCTAGTTACTTGAT  | 36791 | A_95_P115102 DQ340760     |



|       |     |    |      |                                                              |       |                           |
|-------|-----|----|------|--------------------------------------------------------------|-------|---------------------------|
| 37745 | 445 | 5  | 637  | TGTTTCATGTAATCGATGACGAAAAACAGTTCAGCAGCAGTTTTGGCATCAACGTTAT/  | 36793 | A_95_P132427 EB432888     |
| 37748 | 445 | 8  | 255  | ATTGTACCCTTGGGATCACAATGATATATTACGGATCTTCCTAAGAGGCTGCTTTCCA/  | 36799 | A_95_P103637 CV016612     |
| 37750 | 445 | 10 | 351  | AAGCTCTTGATAGATGGCATGACTGTTGGAAAGGTGACATTTACCTGAGGAATTGT     | 36803 | A_95_P108322 CV018791     |
| 37751 | 445 | 11 | 310  | ACCAAAGCCAAGTCTTTACTTCTCCTTCTGCTACTTATGTTGGTGTTTTATGATGGCCA  | 36805 | A_95_P163262 EH622349     |
| 37752 | 445 | 12 | 925  | CAGATAGCATTCTGGATGAATAAGCGATGATTAAGAAAGCTCAAAGCAGTTACTGAT    | 36807 | A_95_P204892 TA18163_4097 |
| 37753 | 445 | 13 | 884  | AGCGGATAGTCTGCCGGCACATTAACCTTGAAGGCAACAAGAATTGCCCTAAAAAC     | 36809 | A_95_P197287 TA16528_4097 |
| 37757 | 445 | 17 | 773  | CAAGTTGAGGTGAAAACATGTTAATACATGTGTACACCACCAAATCTTTCGTAAT/     | 36817 | A_95_P016016 TA12459_4097 |
| 37762 | 445 | 22 | 243  | GACTAAGAGAAGTAGATGTCTGTCCATTGGTTGAATCTATGTATTCCTTTACTTCGAA   | 36826 | A_95_P112782 CV020832     |
| 37765 | 445 | 25 | 424  | ACACTGGTTAAGGCTAAGGCTTCATCGAATTATGTATGTAGAATAAGTTATGCTGTCT   | 36832 | A_95_P090053 BP530782     |
| 37768 | 445 | 28 | 125  | CAGGGAATAAGAGTTTAAATCCATGTAATGCTTCTTGTCTGTTCAATTCATAATTTCTTG | 36838 | A_95_P031141 CV021164     |
| 37776 | 445 | 36 | 809  | CGTTTTATTTCACTGTGTAAGTTGGAATTCGTGCAAATTTCTTAAATTTGGTTTTCGA   | 36854 | A_95_P180867 TA12844_4097 |
| 37782 | 445 | 42 | 888  | GAGTATTCAGCTACACAACAATCTGGTAGTAAAGTAAAGTAAACATGCTAAATTTGTTG  | 36866 | A_95_P100053 TA12097_4097 |
| 37790 | 445 | 50 | 317  | AAGCTTGGGGTGGACAGTTTTTTGGATTTTGCTTTTACAAGATTAAGTGAGGCACATC   | 36882 | A_95_P077905 BP527378     |
| 37801 | 445 | 61 | 1620 | AGACCATTTTCTCTTGAACAGCCTGCCACATAAGTTTCATGTGTATAGCCAGTTGCGAA  | 36903 | A_95_P028961 TA12364_4097 |
| 37802 | 445 | 62 | 1046 | TACTTGCCACCAGTTCTGGGTAGATCATGGATTTTTGTGCGAATAATTTTGTCTGGCT   | 36905 | A_95_P182587 TA13253_4097 |
| 37803 | 445 | 63 | 897  | ATGTGCGGATAGCGGCTGAGACTTAATAAATTCCTGCATGTAGTTATAGTGATGTGT.   | 36907 | A_95_P191122 EB678173     |
| 37805 | 445 | 65 | 469  | ATTCATGGCGACTGGAGTCTTCTTCATTTTCATGGCATTACTTTGTTCTCCAGTGA     | 36911 | A_95_P037821 EB438528     |
| 37810 | 445 | 70 | 707  | GCAGCACTCTTGTATCTAGCCTTGTTCATAGTCTGATATCCTTTCTTTAGCTTTACTTGT | 36921 | A_95_P000576 EB446879     |
| 37811 | 445 | 71 | 696  | AGAAAATCAGCAGTTGATGAGGTCCAAGGGGCTGTACCTTTCTTTGACAGTGCTTT/    | 36923 | A_95_P156982 EH615040     |
| 37816 | 445 | 76 | 400  | ATAGCTGTGGTTTTTATTTAGCTGGAGGCCCGTTTCGCACTGATTGCAGTTTTCAACAA  | 36932 | A_95_P132507 EB433000     |
| 37818 | 445 | 78 | 826  | CTCTTGAATGAAAGAGCAAGGCCAAAACTGGAATCTTCGCTTATGTTAAATATCAT/    | 36935 | A_95_P014296 EB451505     |
| 37822 | 445 | 82 | 1360 | GGCAAGGAGTTGATTGTTGGGTCATCGTATTCTTTTATTTCTCTATTTGACAAGTTTCT  | 36943 | A_95_P003696 AF154640     |
| 37823 | 445 | 83 | 828  | AATTTTGGAAATTCAAACGTGAATTGTAGTGCCATTTCTGCTGCCCCGGCCGTAAT     | 36945 | A_95_P117592 DV160535     |
| 37824 | 445 | 84 | 882  | TGGTTTTGGTAACTTTGAGTGTTCCCTGAGATTTTGAGTTGATCTGATACTTACTTTCA/ | 36947 | A_95_P177372 EB677529     |
| 37828 | 446 | 3  | 150  | TTAGCTAAGCCAATCAGGCAAAGGGTGAATGGTTTGAGGATTAACCTAAGCTTGATT    | 36790 | A_95_P043926 BP130747     |
| 37829 | 446 | 4  | 244  | TTACTCACAGCATGGATGGGTGTTAGCCCTTTTATGGCCTAATAAAACAAATAAGCT    | 36792 | A_95_P032021 CV018753     |
| 37830 | 446 | 5  | 561  | CTTAACTGTAAGCCTTCTACATTTTCGTAACCTAATTATGCAACTCCTTCGGTTCTAGTT | 36794 | A_95_P133417 EB434863     |
| 37838 | 446 | 13 | 0    | ACTGACAGCTTTGTCCAACAGTTCAATGATGCCTTTGTTTTAATATATACTATTTCCCG  | 36810 | A_95_P015081 A_95_P015081 |
| 37839 | 446 | 14 | 878  | AGAGGTCGAACAAGAGCAAAGATGTTGTTGAAGGAAATGTTTGTAGTGGTACAAGGCA   | 36812 | A_95_P189247 TA14749_4097 |
| 37840 | 446 | 15 | 1155 | GCTTATGGTCTCTTTGTTTTATTGCGTTGAGTTGAGCTGGTTACAGTTTTTATCTATC   | 36814 | A_95_P012106 TA12528_4097 |
| 37841 | 446 | 16 | 1355 | GGATGTCCCTAAATTGTACATTTTTAGGTATTTTGAGCCATGAACATAAGTATTGGAG   | 36816 | A_95_P101283 CK720588     |
| 37843 | 446 | 18 | 396  | CCAAGTATTGATTCTTAAACCTCAAGAAATGAAAAGCAGCGAAATACTGAACATA/     | 36819 | A_95_P014601 BP526418     |
| 37845 | 446 | 20 | 666  | ACGCGTTGTCATGTGTCTTCCCTCTTTGGCTGAAAATAATTTCTGTTTGGGGCTA      | 36823 | A_95_P261621 FG639495     |
| 37846 | 446 | 21 | 1074 | GTTGGATCCAAATCCAAATTCAGAATCACTACATCTAGATTATGGAGTCACTTGTTT    | 36825 | A_95_P182417 TA13212_4097 |

|       |     |    |      |                                                             |       |                           |
|-------|-----|----|------|-------------------------------------------------------------|-------|---------------------------|
| 37848 | 446 | 23 | 651  | CAAAGGTTCTGTAAAGTGCCTTCATCATGTTTTCTCTTCAAAGGAGACAAATTTCTATC | 36829 | A_95_P216717 EH623168     |
| 37849 | 446 | 24 | 569  | CTCCCAGTATTCATTTGCTATTGATGACTGGTTGTGTGTTTGAATGATCATATTTCTC  | 36831 | A_95_P001696 FG641355     |
| 37850 | 446 | 25 | 118  | GTTTTGGATTAGTACTTTTTGTGTTGTTTAAAGACAGCTTTTCTGGGAGGTTACTGA   | 36833 | A_95_P098373 BP534443     |
| 37853 | 446 | 28 | 725  | TATGTCCTGAATAATAGTCTCACATCGGAGCTGTTCTAGTAATTCCTTTATTTCCAG   | 36839 | A_95_P234264 DV999602     |
| 37855 | 446 | 30 | 933  | GACATATACTGTACTGTAGTCTGGAGCGCAGTTGTTACAAATTATCTATAAAATGGTA  | 36843 | A_95_P019011 TA21205_4097 |
| 37861 | 446 | 36 | 667  | GAGCTGCAAACCCAGAATAACAAAAATAAATGTCAGACTTCGAGTCGAAATTGAAA    | 36855 | A_95_P111222 TA12934_4097 |
| 37865 | 446 | 40 | 787  | CCGTTTCACAAGACAGGTGGTGTAAAACTAGAATGAACAATTTCTCCAGAAATTA     | 36863 | A_95_P224672 EB447540     |
| 37866 | 446 | 41 | 786  | TAAGATTCTATGTATGTGAAGTACACTAGTTGAAGGGAGTAAGGTTTTTGTGTTGCTT  | 36865 | A_95_P216322 DV999287     |
| 37868 | 446 | 43 | 853  | GGGCTATATTGTGGCAATTGTGGAAACGAGTTTATATTAAGTAAATTTCTCATGGT    | 36869 | A_95_P121567 DW001655     |
| 37870 | 446 | 45 | 961  | ACATCATGCATGCACCGCTTATGAATCAGACTTTTGGAAAAGAAGAAATAAGACACG   | 36873 | A_95_P189597 TA14821_4097 |
| 37872 | 446 | 47 | 869  | ATGTTGTGAGATTGGCATATTGGCATTACCTTTTCAGAAAACAATTAATCCTATGTA   | 36877 | A_95_P249052 EB677619     |
| 37873 | 446 | 48 | 449  | TAAGCCCTCCTGTTTATGAAGATTAGACTTGGTTTCATAGTAGCTGTTCTTTGTTTTAG | 36879 | A_95_P213897 FG640780     |
| 37874 | 446 | 49 | 750  | TCAACGAAATGTGGTCATATCTTCTGCAAGGGTTGCATCAAGGCTTCTATAGCTGCTC  | 36881 | A_95_P294103 EB439586     |
| 37884 | 446 | 59 | 541  | GTACCCATTGGTAACATTGGCAGCATTCTGTAATCTTTATCATATTTGCAGACTTCA   | 36900 | A_95_P210772 TA19467_4097 |
| 37888 | 446 | 63 | 541  | TTGGGGGGCGCAATTTTGAAGCGGGAATACTTTAAAAAGAAGGAAAAATACAAA      | 36908 | A_95_P090593 BP531011     |
| 37889 | 446 | 64 | 198  | GCTGCACATAGAAGGACCTTCTACTAATCTGTTACACATGACATAGATCATCAGTGCT  | 36910 | A_95_P108312 CV018789     |
| 37890 | 446 | 65 | 341  | TGCCACCTAAAGTCTAATGGGATCTAAAGTTAAGGTTTTTCTGTTACCCAAGCAATAT  | 36912 | A_95_P110877 CV019945     |
| 37904 | 446 | 79 | 851  | CCGAACCTTGCAGCTTTGCCAGCTACTGTTAGCTAGTATTATTTCTTATATGTAATGT  | 36938 | A_95_P010826 TA14366_4097 |
| 37906 | 446 | 81 | 143  | ACAGTAATTGAAATGTTTAACTGTGGATACTCTTGGAGGCGCTAGTTTCGGTTATAT   | 36942 | A_95_P091843 BP531525     |
| 37909 | 446 | 84 | 164  | TATGTAAGAGAGAAGGTTTAAAGTTGTGCTGCGCCTTCTGTCTAACTAAATTTGTCT   | 36948 | A_95_P011536 EB442973     |
| 37910 | 446 | 85 | 942  | GCCAACCTTTTGAATTTCTTAGGATGCTCTCGTTCTTCTCACAACAGTTGGTTATTATC | 36950 | A_95_P177997 TA12119_4097 |
| 37913 | 447 | 3  | 423  | AAATTTTGTAGAAAAATGCGCTTCGGGGCTTTGGTCAAGAAGTAAGAGCACATCGC    | 36955 | A_95_P096288 BP533557     |
| 37915 | 447 | 5  | 642  | GCCGCCAAACAACCTTTACTATGTCATCAATGTAGGTAAAGTCTCTAGCAACAGTCC   | 36959 | A_95_P307818 FG193417     |
| 37916 | 447 | 6  | 940  | CTCATTTTTCTTGGATTTTTCTTCTGTTCCAGTGGAAAAGATCAGTTGGAATTATTG   | 36961 | A_95_P186517 TA14144_4097 |
| 37918 | 447 | 8  | 257  | GTTAATAGTTTGGTACTAGCTTTAGCTTAGACCGTGATACAGTGTGTGTTGGCATGCC  | 36965 | A_95_P132237 EB432682     |
| 37920 | 447 | 10 | 333  | GCTTTCAAGTTTAAAGCACCAACTTAGCAAGCAAAAGCTAAATCTACCATATCCCTTC  | 36968 | A_95_P220287 TA21576_4097 |
| 37932 | 447 | 22 | 1256 | CGTTACACCCCATGTTTTGTACGTGAAAAGTACGTCGTAAGTCAATTGATGTAAGCTT  | 36992 | A_95_P017391 TA12092_4097 |
| 37946 | 447 | 36 | 790  | CCTCAGACATGCGCTTTCGATGAATTGCTCTATGAACAGACATTGGTGCTTGAATCT   | 37018 | A_95_P294753 EH621359     |
| 37948 | 447 | 38 | 710  | CCTTATATCGACGATAATAGTGAGTAAGGCGCCAATAATCCTCTACGGTATCAGCAC   | 37022 | A_95_P316153 FG189707     |
| 37949 | 447 | 39 | 796  | AAGTGTTTTGGAACCTTCCAACGAGTTGATGCAGTTGATTCATGACACCTAGATTGA   | 37024 | A_95_P146127 EB450036     |
| 37951 | 447 | 41 | 717  | TCAATGTCAAAGATGTCACCATAAAAGCAGTTGGCATTGCTTGTATTTCTGCATGT    | 37028 | A_95_P271471 EB452098     |
| 37953 | 447 | 43 | 342  | TCAGATCTGTGAAAAATGGGGCAAAGAGAAGACGACAACACGCCATGGCTGCAATA    | 37032 | A_95_P081610 BP528303     |
| 37954 | 447 | 44 | 462  | CCCAGAGAAGCAGGTTGGGTACATAGTCACATCATGTTTGTCAATGAGAAACCACGA   | 37034 | A_95_P158397 FS382929     |
| 37960 | 447 | 50 | 809  | AGTTCAAGTGACAACAAGTGCCTCAGATGCTGATAATGTGACCGGATCTACTGTTGA   | 37046 | A_95_P011176 EB427793     |

|       |     |    |     |                                                               |       |              |              |
|-------|-----|----|-----|---------------------------------------------------------------|-------|--------------|--------------|
| 37961 | 447 | 51 | 360 | TGGATCCAAAAGGGATTCCATTTGATGATTGAGCCAATAAGATAGGCGTAGAATACC     | 37048 | A_95_P162192 | EH621079     |
| 37965 | 447 | 55 | 713 | TTGTCAACTCCACGCAATTGAGTAACAATGCCATTGACATTGTAGCTAAGATTTTCATC   | 37056 | A_95_P315008 | FG198981     |
| 37969 | 447 | 59 | 870 | ATTGCTATTGGCATCAATCCAGAATACAAAGTTCTGGGCAGCACGTATCCATGGATTG    | 37063 | A_95_P116682 | DV159444     |
| 37970 | 447 | 60 | 500 | TAATAATACTTTGATTAATGTTCCACCACAAGAATCTGCGGGCGAAGAGCATGACGA     | 37065 | A_95_P142767 | FG171206     |
| 37972 | 447 | 62 | 695 | CCGCAAAAATGCCAAGTGATGCACACTGTTTCGTTCTTGATATTTTATAGTGAACTTT    | 37069 | A_95_P148672 | EB678096     |
| 37978 | 447 | 68 | 534 | TGCGTTTGAGGTTTGACCCAGAACCTAGTGGTTATCTCCATATTGGTCACTCAAAAAG    | 37080 | A_95_P077600 | BP527293     |
| 37981 | 447 | 71 | 542 | TCTAATTGACTGTCATATGTCGCTTACGTTCTGCATGCAACACATACCTGCTGTAAGA    | 37086 | A_95_P111852 | DV159141     |
| 37983 | 447 | 73 | 839 | CCTTCATGTTGTCATACGTCGCAATTTTGCGTTTGTGCAGTTTGAAAATCAGGAGGAT    | 37090 | A_95_P289728 | EB677597     |
| 37985 | 447 | 75 | 295 | TTTCTAGGCCGCATCTTGGAGGCTCTATTGTACCATCATCCCCATCCATTGATACATCT   | 37094 | A_95_P087618 | BP529837     |
| 37986 | 447 | 76 | 851 | TATTCTTGACCGTTGATGTGGAGTACTCAGTTCGAAAATTCTTGGCGACCAAGTG       | 37096 | A_95_P120607 | DW000571     |
| 37988 | 447 | 78 | 853 | GTATGTGAAAATGATACAGGAAGGAGATTTCTGATCCAAGCTTTTCTGATTCAATTAT    | 37100 | A_95_P008906 | DV162712     |
| 37991 | 447 | 81 | 419 | GCATCGTGCATTACGAGTGATTGGTCCTAATTATCCCTGGCAGTTTAAATTATGTAAC    | 37106 | A_95_P112352 | EB678288     |
| 37993 | 447 | 83 | 745 | TATGTCAGCAAGATGTCACTGCAGGTTTATGGACCAATGGATAGATATCTGTCCAAA     | 37110 | A_95_P236529 | EB678502     |
| 37995 | 447 | 85 | 384 | AACTATCAAGTTGGGAAACTGCTTGTATTGTATGTGTGTGCTACGTGTGTGAGACTC     | 37114 | A_95_P106462 | CV017912     |
| 37997 | 448 | 2  | 265 | CCATGAATCTGTTGTAGTAAGCCTGGTTGTTGTTGTGCTTGAACCTATTTGGTAATAT    | 36954 | A_95_P140567 | EB444457     |
| 37999 | 448 | 4  | 480 | CATCCTCACAGCGCCCTGCTTTAATCCATTCCATTCTGTGGAATTACGGTTGATTGAT    | 36958 | A_95_P062220 | DV160093     |
| 38002 | 448 | 7  | 228 | GGTGTTCATCAGTCGGTTTGACAACCTTGAAGATTTTGGTTTGGTATTTTCGATTTT     | 36964 | A_95_P160412 | EH619099     |
| 38005 | 448 | 10 | 396 | AACTGTCTGAATCACTACCATTTCTGGAAATGAAATCCTCTTCTGCTTGGCTGAA       | 36969 | A_95_P308933 | FG644095     |
| 38008 | 448 | 13 | 749 | ATACCCTGAAGTGACTGACAACCTCACCTTCTGATGATTCTACTGACTTATTCGCAA     | 36975 | A_95_P138327 | EB442057     |
| 38010 | 448 | 15 | 297 | TATAGGTAGAGAGTATATGCATTAGGCTCGTCACAACGATGTACCTACCAAATGTCT     | 36979 | A_95_P095758 | BP533324     |
| 38011 | 448 | 16 | 466 | GGTGCATCTATGTTGAACTTTTTGTTTATGGCATCACCGAACTACTTCGATATCATG     | 36981 | A_95_P129717 | EB429676     |
| 38019 | 448 | 24 | 367 | TTGCTTTAATCTCGTCCGTCGAAGTATGATTTACCTATACGTAGGTTCTTTTTACTAT    | 36996 | A_95_P143542 | EB446803     |
| 38029 | 448 | 34 | 843 | GACACAATTAGAAGAGAGTTGAGACAAGCTGCGAGACCAAGAATTATTTGGCATT       | 37016 | A_95_P197352 | TA16543_4097 |
| 38030 | 448 | 35 | 822 | GGAAGAAGCTGCCAGGCCATTTTAGTTTCGATCACAACCAATGCCGACTATCTAGAA     | 37017 | A_95_P200262 | DV160352     |
| 38034 | 448 | 39 | 467 | AAGACGAATTCAAGGGCTTCTTCTCCAAGTATGGGAAGGTGGTTGATTGCGAGATCA     | 37025 | A_95_P161602 | EB437757     |
| 38035 | 448 | 40 | 463 | CTTTGACAATTGTTAGACTTGTTGGGAGACTCTTGAAGGTTTTAGCAACATAGTTTG     | 37027 | A_95_P123237 | DW003102     |
| 38038 | 448 | 43 | 292 | TCTGTTGCTGCTTTCTTTTATGTTATCTGTTGTGAATACAGATCCGAATACTGTACTA    | 37033 | A_95_P109652 | CV019402     |
| 38039 | 448 | 44 | 883 | TTGAGAAAACGTGGAAGAGTTTACTTTTTCGAATTGGGCTCATGTAACCTATTCAGATI   | 37035 | A_95_P092873 | TA21639_4097 |
| 38041 | 448 | 46 | 619 | ATCCTATGCTATCTTCTTAATACAGGCTCAATGTTTTTGTAGTCTATTCAGTAACATCTCC | 37039 | A_95_P216512 | TA20722_4097 |
| 38043 | 448 | 48 | 744 | GAGGTATCAATCTTCATCTGATTTAATTTCACTTGAAGGTTGACAAGAGCTCAATGTT    | 37043 | A_95_P149837 | EB679804     |
| 38044 | 448 | 49 | 849 | GCAGAATGTCAAAGGCTAAAGGTGAAAGTTCTGCTCAGAAGCTTGACGTGAATGCA      | 37045 | A_95_P180907 | EB681339     |
| 38046 | 448 | 51 | 58  | ATGCGATACTTGGTGTGAATTGCAGAATCCCGTGAACCATCGAGTCTTTGAACGCAA     | 37049 | A_95_P200752 | TA17274_4097 |
| 38047 | 448 | 52 | 808 | TCTTCAGTTAAAGGGAAGCAGACAAAATCTGCAAATGCAAAAAGTGCGATGGCTTTA     | 37051 | A_95_P138247 | EB441985     |
| 38054 | 448 | 59 | 801 | AATGCAAGTTTTAATCTCCTTGTCTGATTTCTTTGGGGATGCAATGCTAATAGGTTT     | 37064 | A_95_P121757 | DW001847     |

|       |     |    |      |                                                             |       |                           |
|-------|-----|----|------|-------------------------------------------------------------|-------|---------------------------|
| 38063 | 448 | 68 | 753  | GAGCAGAAAGATGTCGAGGCTATTATTTTATACTGTTGCTATTTCATTATATGTCAACT | 37081 | A_95_P006641 EH622482     |
| 38069 | 448 | 74 | 609  | CGCGCCAAGCTGGTTGGCAAGGAGAATAAAGATTTAAAACAAAACACTAGTGAATAAG  | 37093 | A_95_P266006 DV160091     |
| 38072 | 448 | 77 | 522  | CTACTGTTACTTTTGAGAGAACATTATTGTCACCTCTTGGAGGCCATTTCTGGCCACT  | 37099 | A_95_P220122 DW002840     |
| 38073 | 448 | 78 | 863  | CTTTATTTATGTCTCCTGTTTCTGGGCTGTACTTTTCTCAAATGAAGCTCTACAGAAC  | 37101 | A_95_P246517 EB431617     |
| 38077 | 448 | 82 | 703  | GATTTTAATTCATATTGTTGCAGGTAGGGGTGTACATGGACCGGGTTGATTGGTTT    | 37109 | A_95_P250762 DV158979     |
| 38085 | 449 | 5  | 471  | TACTTCTGAGGTTTTATTGGTTGTAAGGCAACGCGCTTTCAGATATTGCCATGTACAA  | 37124 | A_95_P091088 BP531203     |
| 38088 | 449 | 8  | 745  | TCCTATATCCAACGATATGGAAATCTGTACCTCTGAAGCGGCCTGTACTAACAGCT    | 37130 | A_95_P030961 EB428717     |
| 38091 | 449 | 11 | 454  | ACGAAAAACAAAATGCTGCGAGTTCTATTTTCGCGAGTTGTCCACTGTTATAATAAG/  | 37135 | A_95_P155522 EG650116     |
| 38093 | 449 | 13 | 1254 | TTTAAAACCTGGAATTGGCACAATATCGCGAAGTGGCCGCCTTTGCTCAATTTGGCTC/ | 37139 | A_95_P147867 TA12737_4097 |
| 38094 | 449 | 14 | 202  | CATGTAACCCAAAATTTGGCCATAATAAATCTACGCGAACTCCTTCCACTATTACTC   | 37141 | A_95_P030756 TA12193_4097 |
| 38096 | 449 | 16 | 571  | GTTAGTGAAGATAAGAATCATTTCGGACATTAAGCATAAAAAAGTTTCTCTCTTGG/   | 37145 | A_95_P050596 BP132431     |
| 38098 | 449 | 18 | 434  | GCCATATTGGCCCCGATCTGTATGTACATACATATGTCGTCAAACCTCGACATACTAC  | 37149 | A_95_P083585 BP528795     |
| 38102 | 449 | 22 | 283  | GCATTCATAGACATAACTTTGCCTCATGGCCAAAGAAAGGAAAAGATGGTATGAAA/   | 37157 | A_95_P130492 EB430526     |
| 38104 | 449 | 24 | 345  | GCTGGAAATGTTGATCAGTCTGATGGAAACTTTCTTGATGATGACCAAATGGCTGAT   | 37161 | A_95_P107637 EB442583     |
| 38105 | 449 | 25 | 331  | ATACAGCTGCTGAAGGGCAGAATTCTCCTGTAAGATTAGATGTTTATTTCCATAATCT  | 37163 | A_95_P074395 BP526460     |
| 38108 | 449 | 28 | 740  | AGATGAATCACGTATTATGCTGGTCTTTTTGATAGAGTCGGATGAGCACTGTCATTTT  | 37169 | A_95_P201167 EH620891     |
| 38109 | 449 | 29 | 0    | CTGCATATTCATGTTTCTCTGCCTCCAGAGCTTTGTGCTTTTCTCTACTTTGTGTAATA | 37171 | A_95_P271221 A_95_P271221 |
| 38110 | 449 | 30 | 637  | GTAAGGAGTTTTGGCTTTGGTAGCAAAAACCTGCCTAATAAAAAATTGCTAGGTCCTT  | 37173 | A_95_P005311 TA13278_4097 |
| 38112 | 449 | 32 | 1178 | GTTAGTACCTGTATCTAGTGGGCAAGAATGAATACCTCAGTATGATTAGTACTTGTA/  | 37177 | A_95_P196912 TA16447_4097 |
| 38113 | 449 | 33 | 602  | TTTGTGGTTTTGTTGCTGACATCATATTCGAGGTATCATATTTGTACAGGGTGTTTTC  | 37179 | A_95_P121622 DW001740     |
| 38114 | 449 | 34 | 803  | GGTTGTACTTCTATGTATTCTTGTCGGTTTCTGTACATTGTAGCATATTGAAGTTGTT  | 37181 | A_95_P019501 AF197567     |
| 38122 | 449 | 42 | 0    | AGGGTGGCTCCAATGTCATTTGCTTTTGCTGACTTATTGTTTAAAGAAAAGACAGCTCC | 37196 | A_95_P307653 A_95_P307653 |
| 38124 | 449 | 44 | 402  | CCAAAGTGCAATAAATGACTTGAATGGGAAATGGCTTGGAAAGCAGGCAAATCCGCT   | 37200 | A_95_P137732 FG148931     |
| 38125 | 449 | 45 | 610  | TATTACAGGAGAGCAAATACATCAGCAAGTTTCGACAGCATCGCCGGTGAGACAGA/   | 37202 | A_95_P153017 EB683331     |
| 38126 | 449 | 46 | 724  | GCTGGGATCTTGGTGCCACTTTTCTTATGCTTTCTACAAAGTTTCTAGCCTGGAATA   | 37204 | A_95_P164022 EH623128     |
| 38127 | 449 | 47 | 74   | AATTAACAATGGCTTCCTCAGTTCTATTCTACTAGCAGCAGTATGCCACCCGCGACA   | 37206 | A_95_P176672 TA11710_4097 |
| 38133 | 449 | 53 | 760  | CCTGCAACTTTTATTACAGGAGCATTCTCAGATCATTAGAATACAAAGATGATTCTT   | 37218 | A_95_P303558 FG175635     |
| 38143 | 449 | 63 | 797  | ATTGGGTTAATCTAACGGCTAGGATTGATCTATATTTGGAAGTTTTATCGAGCTGTCT  | 37238 | A_95_P000636 DV999134     |
| 38145 | 449 | 65 | 592  | ACAGTGAATAGATGCAAGCAAATGCTTGGATAGGATAGTCCCTTTTTTCTTCTTTTG   | 37241 | A_95_P308123 FG641059     |
| 38147 | 449 | 67 | 374  | ATATCGCCAATATACTTTGGTCTTTTCTGTTGGATGAAAATGAGAAAATCTTCTCGT   | 37245 | A_95_P186832 FS429988     |
| 38151 | 449 | 71 | 516  | GCTTCATGTAAGTTTACCTCAGCCCTACAATGTAATTTTCTGTAACATCATTCTTAT   | 37253 | A_95_P217032 TA20839_4097 |
| 38152 | 449 | 72 | 718  | TTGCTCAAACAAGAGGCAAACGCTTGGCAACAATTTCAATCAACTAAAGGTCAGA     | 37255 | A_95_P265096 EB679658     |
| 38156 | 449 | 76 | 1556 | CTTTGAGAAAGTTCTATACTCTGAAGTTGTTGATTTGTGTGCAAATCTTGGTTGAT    | 37263 | A_95_P191767 TA15308_4097 |
| 38163 | 449 | 83 | 565  | CATCGGGATGGATCTTATAATTGTTTGTGATACTTAGTTGGGATGTTTTACAGAGC    | 37277 | A_95_P068605 BP137171     |

|       |     |    |      |                                                             |       |                           |
|-------|-----|----|------|-------------------------------------------------------------|-------|---------------------------|
| 38170 | 450 | 5  | 109  | GAAGATATGGGATTGCAATTAATAATCTTTAGTTGCCATCAAGCGATGGCCAGTTTG   | 37125 | A_95_P104957 CV017238     |
| 38172 | 450 | 7  | 474  | TGGACTACAAAGTATGCTATGGGTTAGTTTGCTGAAACACAAGTATTAGGGTAATAA   | 37129 | A_95_P112027 CV020487     |
| 38176 | 450 | 11 | 504  | ACGTGAATCACTCCAATAATCATTTGACTCAAATATTGGACCCATTTTTCGTGAACA   | 37136 | A_95_P143347 EB446681     |
| 38179 | 450 | 14 | 278  | GCCACAAGCAGTAAATAGTTGATACATTCGTTAAGGTTGATTTTACAAGTACTTGTTT  | 37142 | A_95_P219352 TA21377_4097 |
| 38180 | 450 | 15 | 938  | GGAGTATTGGGGAGTTAGCAACTATCTTGATAGAATGAAGTTCAGCTTTCTTGCTTC   | 37144 | A_95_P181107 TA12902_4097 |
| 38182 | 450 | 17 | 531  | CAACGCCCTAGCCGGTGTATTTTTGACTCAAGACTTGCGAGTATTTCTAATTGAAC    | 37148 | A_95_P153452 EB683715     |
| 38184 | 450 | 19 | 896  | CATGCCCAGTTGTGCTGGTCCATTGTAATATTCTCAATTTGGGATCTATTAATGCAAC  | 37152 | A_95_P243937 EB678959     |
| 38186 | 450 | 21 | 744  | CTCCCTCCTAATCACTGTCCTGTAAATATGGTTTGAACTTTGATGGAATTTTAG      | 37156 | A_95_P262031 FG166722     |
| 38188 | 450 | 23 | 253  | AAACGCAGAACATTTTACAAGTATTAACCTGCAATTTGGCCGATGTGTTATTGTGTG   | 37160 | A_95_P015156 EB446995     |
| 38189 | 450 | 24 | 1208 | CCCTTTGTGCTTTAAAGATGTAGTATGGGACTGGTTTATTATTTGGATTCAATGACTC  | 37162 | A_95_P179647 TA12556_4097 |
| 38194 | 450 | 29 | 838  | AGTTTACATGGAGGATGTGAAGTACTCTCAGGAGAGAAGTGGTCAGCTACTAAATG    | 37172 | A_95_P145487 EB449248     |
| 38198 | 450 | 33 | 817  | CGGTATTGTTTTGCTTCAACTTTGTCTTCTTAAAGATGTTAGCAGTGATTACCATAGC  | 37180 | A_95_P180112 TA12662_4097 |
| 38208 | 450 | 43 | 662  | TGATGAAAGTCTGTTTCTCTCTTTTCAGTTTGCCTTTATTATGTGGCTGTTTGCTC    | 37199 | A_95_P203272 EB445782     |
| 38212 | 450 | 47 | 154  | TATTTGTATCTGCTTTAAAGTGCCCATCTCTATTCCCTGTACGGCAACCAGGTGTCTGC | 37207 | A_95_P160842 TA17380_4097 |
| 38216 | 450 | 51 | 276  | GTTGTGTTGATAATCCCTTAGGTATCTGCTTGTGCTTATTTGATGTTGCCAATAAGC   | 37215 | A_95_P097133 BP533889     |
| 38218 | 450 | 53 | 866  | ATGCGTGGCGTGATGTTTGTAGTCTGTGCATTACTTTTAAACATAAATTTAACCATC   | 37219 | A_95_P130437 DV158046     |
| 38223 | 450 | 58 | 792  | GCTCTGAGAATATGATCATTGGCGGAAGATTTGGAGTGTTGATGACAATGGGTTG/    | 37229 | A_95_P225002 FG133315     |
| 38224 | 450 | 59 | 839  | CTGGAGTTCTTTGAAACAGTTTTTATCTGTTTACTGTGTTGTGGATTGTTTGTGTGC   | 37231 | A_95_P184877 EB424704     |
| 38232 | 450 | 67 | 510  | CTGACTCTTTGTATACACTTGAACCCACCTAAATATTCAGTGATCTCTATTAGGAAT   | 37246 | A_95_P263611 EB436961     |
| 38235 | 450 | 70 | 185  | ATATTAGAATTGGGGTGGTTCGAAACATGACAAAGAATGAAAAGCAAGCTCTGTTAG   | 37252 | A_95_P051466 BP132651     |
| 38260 | 451 | 10 | 876  | TGTTAGAGCCCTTTAGTTACTGGATTTGCTTTATTACGTGTACAATTAATGAGTATG   | 37301 | A_95_P208367 DV157686     |
| 38263 | 451 | 13 | 803  | AGTAATGCTGGTACCTGGTAGTAGGGATTGGCAAATCAATGGAACGCATCGTATAA/   | 37307 | A_95_P268966 DW003673     |
| 38266 | 451 | 16 | 1764 | AGAGCTGTTGGCAGCTCCCTTAACTCAGAACTATTACAGTAATTCCTTTTCTGGAAAA  | 37312 | A_95_P251697 X92967       |
| 38270 | 451 | 20 | 476  | AATGCGTATGGTGAAGATGATGACTCATATAGAGACAATAATGATGATTCATGCTAT   | 37320 | A_95_P262891 AM783645     |
| 38279 | 451 | 29 | 560  | CATATGTTCTATCATAGTGTATCTAGATGCTTGTGGTGTAAATTTCTTTCCGATGCTT  | 37336 | A_95_P060885 BP135115     |
| 38283 | 451 | 33 | 494  | TTCCCAATTCGGATTCTGTTCCAAAAAATGGAGTCGGATTGAACGACCTTGTCGCTA   | 37344 | A_95_P077885 FS406615     |
| 38284 | 451 | 34 | 796  | TTCTTGAACTTTTGGATGGAAAATGTGGTTAGTGCTGTGCAAATTGAGAAGCACTTG   | 37346 | A_95_P267416 DV160102     |
| 38287 | 451 | 37 | 686  | GGGTAATGGTGATCTTGTATATCTGATTTTCAAGTCTTTTTCGAGAATTTTGGATTCC  | 37352 | A_95_P123807 DW003714     |
| 38288 | 451 | 38 | 313  | AATGAAGCATGAGCGGGCACGGTTGGAGGAAGAAAATTCAAACAATTGGAATTAC     | 37354 | A_95_P147747 EB643433     |
| 38291 | 451 | 41 | 288  | AAAGTTTGAAAAAGAAGGTCCTCAAGTCGCTCCGAAGCTCAGTTACACGACGGA/     | 37360 | A_95_P002131 FG642019     |
| 38293 | 451 | 43 | 910  | ATCCAGCGATAACAATTTTCATTTGCCTTGATGGATGTGCAGTGTGTCAACTGGTTT   | 37363 | A_95_P247907 EB430441     |
| 38297 | 451 | 47 | 814  | ACAGTCCAATCCGATACCCATGTCACATACAGCACCTGTCTCTGATGTGAAAAAGAA   | 37371 | A_95_P285098 DW001320     |
| 38306 | 451 | 56 | 885  | ATTCTAGAACCTTACTGCAGACTGCTATTGGCTGTGTCAACCTTCTTCTACAATGT    | 37389 | A_95_P268161 DV999672     |
| 38312 | 451 | 62 | 545  | GAAGCCAACGACTGATTACCTTTTTCCCTTCTAAATGTGAAAAATGGAATGTAAG     | 37401 | A_95_P134327 EB436553     |

|       |     |    |      |                                                             |       |                           |
|-------|-----|----|------|-------------------------------------------------------------|-------|---------------------------|
| 38315 | 451 | 65 | 513  | GATATAAAGTTGGAAAGGACAGAAGTTGGAAACCATTTGGAGGAATTCTAGTATCT/   | 37406 | A_95_P045511 BP131163     |
| 38318 | 451 | 68 | 758  | GGGAAGCAAACGTGTAGAAGGTATCATATCACTCAGTGACATTTTCAAGTTCTTGCTI  | 37412 | A_95_P303513 FG194435     |
| 38327 | 451 | 77 | 896  | TGGATTTGACTTGCCACCAGTTCTGGGTAGATCATGGATTTTGTGCGAATAATTT     | 37429 | A_95_P250362 M77225       |
| 38328 | 451 | 78 | 416  | CTCATCATAATTTCCCTAGTTGAACTATTTCCCTGTGAAATTTCTACTAAGACGTAGT  | 37430 | A_95_P074065 BP526376     |
| 38330 | 451 | 80 | 740  | CCGCATGGTTTAGTATTTTGCTTCTAGCAATATTTGAGCAGACTTAAATTGTTTCAACT | 37434 | A_95_P017631 TA12941_4097 |
| 38337 | 452 | 2  | 175  | ATGTTTGCCGTCACATTTTCCGGTTCTACAAAGAAGTTGAAAGATCTGCAGGTTTCATC | 37286 | A_95_P115653 TA17337_4097 |
| 38338 | 452 | 3  | 601  | GTTTTCTTTCCTAGACTTCCCAGATTATTATGTAGAGGGGATGTATCCAATTTTAGTTC | 37288 | A_95_P123677 DW003542     |
| 38345 | 452 | 10 | 875  | TTTCTCAGATGCTGTCTCAGTTGTATGATATAGTAATTGATGTGGACGGCATTCTGA   | 37302 | A_95_P244812 DV161814     |
| 38346 | 452 | 11 | 640  | GGTAAAAATGAAAAGCTACATGGTGGGGACTCTGAAAATGCGCTGGAAAGGGATTC    | 37304 | A_95_P144777 EB448318     |
| 38353 | 452 | 18 | 733  | AAGGCCATCAGGAAGTGGCAGCAGCACAAAGGGAGTAAACTGATTGTGTTTTAGACC   | 37317 | A_95_P117097 DV159885     |
| 38354 | 452 | 19 | 893  | AATGTTTGAACCAGGGTTAAGCCCAGGATATGGGGGAAATGCAAGCTGCTGTTGAA/   | 37319 | A_95_P201972 TA17534_4097 |
| 38361 | 452 | 26 | 827  | GTGGAGATGTTTGCAAAGTAGCTTCAAAATCTTGTAGTAAGCTTGAGAAGTAATTA    | 37332 | A_95_P010736 TA13597_4097 |
| 38369 | 452 | 34 | 790  | CAATAAAATGATGGCCAAGCAAAAGCGACGAGAAAGGGAATGGGCTGGCAAATCTC    | 37347 | A_95_P093403 EB444132     |
| 38372 | 452 | 37 | 145  | GTTGGTATCTTCTCTCAAGTCGCTTTGAGCTATGTAAGGCAAATAATTTGGTTATTTT  | 37353 | A_95_P029266 TA19409_4097 |
| 38373 | 452 | 38 | 542  | TTCATCTGGTGCCTTTATGTTGAATAGGCTGTTTGTATTAGTGGTTCAATGCATTGA/  | 37355 | A_95_P263266 FG635677     |
| 38375 | 452 | 40 | 509  | ACCACTAACAAATGATGCTGATGCTGCTGACCCAAAGTTGCTGGACTGATTAAGATT   | 37359 | A_95_P102352 CV015989     |
| 38379 | 452 | 44 | 169  | TTAATGCAGCCTTAGAACAGTTGGACTTCCCTGGAGTTTGCAGCTTTCTACAGAGTTC  | 37366 | A_95_P078535 BP527538     |
| 38381 | 452 | 46 | 819  | GACGAGTAATGCAGAAGTTTAAATCAGCTTTGAGCTGGTTGATGAATATACTTTATTI  | 37370 | A_95_P207502 TA18755_4097 |
| 38382 | 452 | 47 | 573  | ATCCCTACCCCGACCATGTATTTCACTTTTACTTAGTACGTGATAGAAAGTGAATTA   | 37372 | A_95_P027876 TA17866_4097 |
| 38384 | 452 | 49 | 1451 | TGAGGTTACAGCAATGAAAGCAGCATCTCTGCCGCTGCAACTTTTAGATGGTATAA    | 37376 | A_95_P206392 TA18506_4097 |
| 38388 | 452 | 53 | 657  | ATGCATTGATGCTACTAGGCATGCCTTCTTGTTTTTAACACTTGGATTGTATCCATAT  | 37384 | A_95_P000446 EB432747     |
| 38389 | 452 | 54 | 404  | ATGCCATAAAACAACCTTAGGCCTATATATTAATTTTCTCTGAAACGGCAAAACGGC   | 37386 | A_95_P213612 TA20085_4097 |
| 38391 | 452 | 56 | 411  | CTGCCAAATGCTACTCAAGTTTATCTCTAACCTCTTCTTGAAACTAACTTAATGTG    | 37390 | A_95_P086798 BP529632     |
| 38393 | 452 | 58 | 645  | ACTGTAGTGAGGTGAATGGAAACCTAGAGAATGTAGATATTTGCTGAAATAAGGCA/   | 37394 | A_95_P021096 EB432538     |
| 38395 | 452 | 60 | 610  | GATGTTCAATTGGAAAGCACTCTGAGCCGTGTTTTGGTTCGAGCAACTTAGAGAAAAC  | 37398 | A_95_P159432 EH617629     |
| 38410 | 452 | 75 | 750  | CTGCCAAGAGTATTGGATTCTTCATATGAACTTTGTGTATGTTTTTCTCTAGTATCC   | 37426 | A_95_P162247 EH621149     |
| 38419 | 452 | 84 | 246  | GTGGTTCAAAAGAAAGTCGATATGTATATCCCATTGTTTTTATCATCCTTGAGTCAI   | 37443 | A_95_P155027 EG649864     |
| 38426 | 453 | 6  | 1077 | AGTGTCTCGAAAACCTCTATCTAGTGGACCATCTGAATGACTATGTAATTAAGGTT    | 37456 | A_95_P192552 TA15476_4097 |
| 38427 | 453 | 7  | 1181 | TTTGATTTAAGCTGACAAAGATGCTAGCAAGATGAGTTACGTGGCAGTTCTTATCCCC  | 37458 | A_95_P210792 TA19471_4097 |
| 38428 | 453 | 8  | 367  | AATTTGTGGGCTGTGATGGAAAAGACATATAGTCCCTGACCTTTACATACAGTTA     | 37460 | A_95_P071905 BP525820     |
| 38430 | 453 | 10 | 845  | CATCTCTCCCTATCATTGTATAGTTGCCCTTATACTTGATGTCTCTCAGCGGTGG     | 37464 | A_95_P231309 EB439273     |
| 38433 | 453 | 13 | 889  | GTGGAATAGTTGAATTGGCTCCAGGTTACTTGCCTGCTGTATACAACATTATACGAA/  | 37470 | A_95_P128302 EB427893     |
| 38442 | 453 | 22 | 871  | TGCTATACTCAGTTATGGTATTTGTCTGTGTAAAGTATCTTCTGTTTACACAGTTC    | 37487 | A_95_P205072 DV161430     |
| 38445 | 453 | 25 | 723  | CCAGACTGCTATTGTATTGTAAATTAATTATCTCTCGATTGAAAGAGCAGCTCATGTI  | 37493 | A_95_P013811 EB429285     |

|       |     |    |      |                                                             |       |                           |
|-------|-----|----|------|-------------------------------------------------------------|-------|---------------------------|
| 38448 | 453 | 28 | 403  | ACTGTTGACTTCTTGAACCAGTGACCCTTTTCAGCAACAAATGTTTTGATTAATG/    | 37499 | A_95_P248142 FG645407     |
| 38449 | 453 | 29 | 914  | GCGTTCAAACCTTTCTCCTGTTTGTGTTTTGGGGTTGTGTTGACTTTCTATCAAATTT/ | 37501 | A_95_P000306 TA11800_4097 |
| 38451 | 453 | 31 | 465  | GTTCTTAGGGTTTACACCTTTTGGATATCTAAACTCTGAATTTCTGTCTAAGCCACGA  | 37505 | A_95_P127392 EB426935     |
| 38455 | 453 | 35 | 873  | AGTTCAATTCGATGTTAGAGTGTGGAGCCAATACGGGATGTAAAGATAGATAACCC    | 37513 | A_95_P013406 DV999136     |
| 38460 | 453 | 40 | 1443 | GGATCAAGCCTTGTCCTTTGTTATATTCTATTGTTTCTTCACTTTAGAGCTGC       | 37523 | A_95_P205647 TA18334_4097 |
| 38462 | 453 | 42 | 1187 | CCAGTTTCTTGATGGCAGTGAATGCTTAAAATGGTCATCTATTTATGCATTCTACT    | 37527 | A_95_P201022 TA17336_4097 |
| 38463 | 453 | 43 | 657  | GGACAAGGAATCATGGGATATGAATACTCAGGAGAAAATTGAGGCTGCTGGCAAG/    | 37529 | A_95_P102002 CN949739     |
| 38470 | 453 | 50 | 1148 | AGCTTCTTTGACCTTGTGGTGACAGCTTTTACTGTTTGTGTTTGAATAATATCCTC    | 37542 | A_95_P141307 TA14854_4097 |
| 38476 | 453 | 56 | 525  | CGGACTGCCAGTGTATTTATATTTGCATGTATTATCCGAAATTCGGACTGGTTAT     | 37554 | A_95_P121872 DW001963     |
| 38478 | 453 | 58 | 680  | ATTTGCTAGTTTGATGACCAGAATGCTACAACAGCAGGGACAAGGCATTAATAAT     | 37558 | A_95_P151382 EB681594     |
| 38481 | 453 | 61 | 1529 | AGCGGACTTCTTGACATTTGCCAAAAATGCTACTTCTGTTTCTGGTGTGATGATCAGC  | 37564 | A_95_P018211 AB120519     |
| 38487 | 453 | 67 | 772  | GCACGGTGATGGTTTTGACTTTGCAAATGAAGCTGATTTGCTCCGAGTTGTTTTC     | 37575 | A_95_P123862 DW003750     |
| 38488 | 453 | 68 | 333  | CAATCAGGTGTTGAGGGAGTGAATTATTTGGAAGCTTAAATCTGTAATCCAGTGAA    | 37577 | A_95_P093923 BP532482     |
| 38491 | 453 | 71 | 735  | ACGAAAAATCCCATTTACTGACAAGGATAAAGAGGAATTGATGTTGCGCACTGTGGT   | 37583 | A_95_P127412 EB426949     |
| 38495 | 453 | 75 | 92   | TTGGGTGGTTCTTATATTGAACGTACACTTCTTTATTAATGTTTGTGGTACTTCTGG   | 37591 | A_95_P216277 TA20669_4097 |
| 38503 | 453 | 83 | 460  | CTATATGGATTTGGTGGTTAAATTTCTGTATCTGGGTTTTGGGTGTTTGTAGTCT/    | 37607 | A_95_P000976 CN949751     |
| 38505 | 453 | 85 | 250  | CCCTTTGGCAAGTCTGACTGTTTCGATACTTGAAGCAAGAAAGATAAATATCTT      | 37611 | A_95_P088748 BP530198     |
| 38511 | 454 | 6  | 535  | GTTCTGTATCTTTATTGGAACGGATCATGAAGAGATCAATGGTAAATTGAAGTGTG    | 37457 | A_95_P071355 BP525684     |
| 38513 | 454 | 8  | 1249 | AGAACACTGTACACGTTCAAGAATGGAACATGGAGCTTACTCTAAAATCACGATAAA   | 37461 | A_95_P228129 EB643449     |
| 38515 | 454 | 10 | 677  | GTTTGTAGATTTGGTTTTACAACCTGAATGGCTGCAATGTAGTGGGTGGCAATTTTCA  | 37465 | A_95_P187547 EB679266     |
| 38524 | 454 | 19 | 842  | TAAACTTGTTGGAGAAGTTAGTAGCCTGTAGTTGCAGAAGCTTGATACAGGCGCT     | 37482 | A_95_P217997 EB679873     |
| 38526 | 454 | 21 | 765  | GAGCCTGTGACAGCACAAATCAGGAATGTTACTTCTGTTATTTTAATTAATTGTTGCC  | 37486 | A_95_P011616 DV159148     |
| 38538 | 454 | 33 | 674  | TCCACGTGCCTGGTATGATGAACTGAAAGCTTATCTTTTATCTTTTGGTTTTCTACT   | 37510 | A_95_P128867 EB428602     |
| 38539 | 454 | 34 | 716  | ATTTACTAAAGCTCAAGCATGAAAGACGCTCCAGGACCATCTAGTCAGGACCACTGC   | 37512 | A_95_P146142 EB450046     |
| 38540 | 454 | 35 | 447  | TCATCTCGATCTCTTTGTGTAGTACTTATGCCTCATTGATTGCTTATTAAGGGTTTCA  | 37514 | A_95_P062940 BP135650     |
| 38541 | 454 | 36 | 840  | GAAAGGGAAGGATGCACAGATTCAACTGTGATATACGGAGCATGACAGATCTCATA    | 37516 | A_95_P150302 EB680397     |
| 38545 | 454 | 40 | 278  | CTTGGACAAAAATATCCTACCTGTTGATGCTAATTGTTTTGACGAAATTACATGGGTG  | 37524 | A_95_P074180 BP526400     |
| 38548 | 454 | 43 | 781  | GAGTTTTTATCAAGTTGAAAATTTGAGCGCATCGAGAAGGATTGACTGCTCTTGATT/  | 37530 | A_95_P115477 DV157710     |
| 38549 | 454 | 44 | 1377 | ATCACTGGATGTAGTGCTAGGATTTTTATCTAGGAACGACTTTCAAATTTATCTGTCT  | 37532 | A_95_P198137 TA16714_4097 |
| 38553 | 454 | 48 | 411  | GCTATGGTTTTCCACTCACCCATCGGTCTTGTGTTTTACATACAGAGACTGAACTTCC  | 37540 | A_95_P094558 BP532774     |
| 38554 | 454 | 49 | 279  | TTGGGTACTTGGGGCTGAAAATGTTAGGTTTCTAAGTTTTGCTGTTCAATGATGT     | 8937  | A_95_P000091 AJ717873     |
| 38555 | 454 | 50 | 894  | GATATGTGATTTTCATCCGAGATAGCGAATGATCCATCCCTCAATTTGTAGCCTAAT   | 37543 | A_95_P250922 EB679010     |
| 38557 | 454 | 52 | 172  | GCTGCATTGCATTGACAAAGCTCCTGTAATATATGAATGTTTCTGTTTGGTTAAAAATG | 37547 | A_95_P178567 TA12282_4097 |
| 38560 | 454 | 55 | 326  | GCTATTTTGTGAAGGGAATCTGTGTGGTTCATTTTGGCTTAGGTATTCAAATTTTGT/  | 37553 | A_95_P088358 BP530024     |

|       |     |    |      |                                                              |       |              |              |
|-------|-----|----|------|--------------------------------------------------------------|-------|--------------|--------------|
| 38561 | 454 | 56 | 703  | AAGACAGAAGCTGTGAATGAAGATGCCCGACGGGCAATAAAGAAGAGAGTGATC       | 37555 | A_95_P124232 | FG147854     |
| 38563 | 454 | 58 | 799  | ATAAGCAGTTGAATGATAAAGAACGGGTAGCTGCAGCATTGGAAAACCTAACCTC      | 37559 | A_95_P134447 | EB678124     |
| 38565 | 454 | 60 | 828  | GCAAAGCTTCCGAGACTGAGATCATGAGAGATTTTTTCATGTGTATTGTATGTTATCT   | 37563 | A_95_P030016 | EB677612     |
| 38566 | 454 | 61 | 227  | TTGGTACTACATTAGAGCTGCTTCTATGGCAAGGCAAGATTTATTTGCAGGGGCGGT    | 37565 | A_95_P108422 | CV018824     |
| 38569 | 454 | 64 | 1277 | CAATAAGGATGATTCTTTAGTTTTTCATGCTAAGAAAGTGTTTCAGGCTAATACTCTTG  | 37570 | A_95_P179482 | TA12517_4097 |
| 38571 | 454 | 66 | 810  | GAATCATCACGAGGATCTGACAATAGATGGAGGCACAATCAGCATTTC AAGTCCTTA   | 37574 | A_95_P264081 | EB426755     |
| 38575 | 454 | 70 | 902  | GGTTTGCAGTGTAACCTAAGGTGCTTCGTTGATGCTTTTGTTCAGAAAACATAA       | 37582 | A_95_P214042 | TA20176_4097 |
| 38576 | 454 | 71 | 0    | CTCAGAAATTATTGGCGGGCACTTAAAGAAAGATAAGTTTCTCTGTAATTTGTAGTCT   | 37584 | A_95_P016896 | A_95_P016896 |
| 38577 | 454 | 72 | 789  | CTCGTTTGTAAACAGCTAAGCTAATATGGTCTCAAGTCAGTTTGGTCGATTACATAAA   | 37586 | A_95_P020001 | AF072519     |
| 38581 | 454 | 76 | 737  | GAGTATGGATCACAGAAGATAAAGAGGATGGAGGAGTCATTGGGAGTTTGACAATC     | 37594 | A_95_P160512 | EH619204     |
| 38582 | 454 | 77 | 737  | GAAAACGAAGTTTCGAGAGTAACATGAAGCATTGAGTGAGCAGCCACCTGTAAAC/     | 37596 | A_95_P156657 | EH614430     |
| 38583 | 454 | 78 | 566  | TGCTTGGAATTGGAGCTATATGGATGTGATTGTGAATTAAGACTGGTTTGCATTGAA    | 37598 | A_95_P023321 | BP534049     |
| 38584 | 454 | 79 | 700  | ATACTCTGTCTCCTTCAGCCTTAGAACCGAGACTAACTACAGTTTCTCATCTTTTC     | 37600 | A_95_P223667 | TA22302_4097 |
| 38585 | 454 | 80 | 507  | TAAATATGGGAAAGAATTCGTGCTGCTGCTACAGAGCTCATGCCAGAATGTGGTGT     | 37602 | A_95_P145127 | EB448669     |
| 38586 | 454 | 81 | 854  | AGTGTAAAGTTCAAAGTTGGTAGTCTGGCTGACTATGATAGGAAAGCATGAATCTC     | 37604 | A_95_P018386 | TA13793_4097 |
| 38588 | 454 | 83 | 454  | TTCCCAGTCAAGGTTTCTAGGATCAACATACCAAGTGTCCAAACATCAGTTTTCTGT    | 37608 | A_95_P275328 | AM827537     |
| 38590 | 454 | 85 | 700  | GAATCAGATGTAGTTCAAGCATGCCGAAGATTGCTTGGTGAGCGACAGAGTCCAAA     | 37612 | A_95_P202517 | FG135146     |
| 38592 | 455 | 2  | 222  | ATGATCGTTGCTTTGCCTCTGGGCGTTGTTTCATATTGTATTGAAATCTTAATTTCCAT  | 37615 | A_95_P093348 | BP532227     |
| 38601 | 455 | 11 | 300  | TTACTTGAAAAGGAATAAGTGGGCTTCGTATTATGCAAGTCATTTCTGGGATGAGAT    | 37633 | A_95_P089393 | BP530482     |
| 38604 | 455 | 14 | 441  | TTTCGTTAGCTAAACCAGATACTAAGTACTATATTTGATATTGGGAAGAGGATTTGTC   | 37639 | A_95_P134462 | EB436799     |
| 38608 | 455 | 18 | 488  | GTGGTCTTGGATGTCTTTTGGGCTTGTAGTTACTGCATTGTGACAGTATAATCAACTG   | 37647 | A_95_P281078 | AM811486     |
| 38609 | 455 | 19 | 799  | CATTGCTTTTTTGTACTAATGAAAGAGCTATAAGCGAGGAGGGAATGCATTGTAATA    | 37649 | A_95_P139447 | EB443206     |
| 38617 | 455 | 27 | 527  | TACCGTATTGTGATGTAACGTAATACTGATGAGATTTGACTATGGTGGATCTCTTTGA   | 37664 | A_95_P121572 | DW001658     |
| 38620 | 455 | 30 | 356  | GACTCCATTAACATCCTATTCTTGTCTTTGGTGTGGATGGAACATGTAAATGAGGTTG   | 37670 | A_95_P078360 | BP527496     |
| 38624 | 455 | 34 | 740  | TATGTCACTGATATGGTGCACAAAGCTCAAGATATTGCAACAAAAGGGGGAAGCTI     | 37678 | A_95_P295573 | FG197647     |
| 38626 | 455 | 36 | 930  | GAGTTTGAATGTTTCGGTTTGTGTTAGCAATACCTATTTTATTTTGC GAACTGCCCTTG | 37682 | A_95_P233984 | DV157889     |
| 38629 | 455 | 39 | 469  | GGACAAAAGTTTCTTGTAAATGTAATAATCCTGCAGTAATCCCCTTCTCTTGAATTC    | 37688 | A_95_P050001 | BP132294     |
| 38630 | 455 | 40 | 620  | TAACTACTTTCTTCTTATTGTGACTGTTGGACGCTATAGCTATTCTATGAACTCGTTG   | 37690 | A_95_P016591 | FG144478     |
| 38631 | 455 | 41 | 594  | ATTGAAAAGCTCTACATTGGGGGATCTGAGACAGAGCATTACGTGGAGGACCTAA      | 37692 | A_95_P041586 | BP130129     |
| 38633 | 455 | 43 | 882  | CAAGCTTTCCTAACATATATGTGGTAGATGCCATATCATTGTACCTCTGAACTGCAG    | 37696 | A_95_P189797 | TA14864_4097 |
| 38644 | 455 | 54 | 848  | TGCTTAGGGCATAACAATGTTGATTTTTACATGAATGGACACGACCACTGCCTTGAAC/  | 37718 | A_95_P216917 | EB425136     |
| 38645 | 455 | 55 | 630  | TTGTGAAATGCTCATTGTTGGAGAGGTGTTAACGGGAGATAAAGTAAATACAATCTC    | 37720 | A_95_P263831 | FG636095     |
| 38648 | 455 | 58 | 338  | GAATAAATTGACAGACCTGGCTTTGCCTATGTGAATGTATTGTTATCCCTATAGTTTG   | 37726 | A_95_P031401 | EB435730     |
| 38652 | 455 | 62 | 455  | AGGTTCTGCTATGGTGAAGTGAAAGATCTTTCCTATAGTGGGAAGAAGACAGGTC      | 37734 | A_95_P028346 | BP525606     |



|       |     |    |      |                                                               |       |                           |
|-------|-----|----|------|---------------------------------------------------------------|-------|---------------------------|
| 38656 | 455 | 66 | 890  | CCTTTGATCAGACTGTTTGGTCAGCAATTTGGAACAGCATTACTACTACAGTTTTGGG    | 37742 | A_95_P008046 DV161189     |
| 38668 | 455 | 78 | 866  | ACATAGTTGGGGTTCTCTCCTTATTTGTTCTTATTAGCTGTGATGATGTGATATGCATC   | 37766 | A_95_P233959 DV999223     |
| 38670 | 455 | 80 | 1317 | CAATGTACCAGTTTTTTGAGTTCTGTAGTGAGTTATTTTCAGAATAGACAAGCAGCGA    | 37770 | A_95_P026896 TA14217_4097 |
| 38677 | 456 | 2  | 976  | CTATTTCTGGACATTTTTTCGCAATGGTCAATTTTCATAGTGGAAAGTCTTGTTCAGCTTI | 37616 | A_95_P178362 TA12229_4097 |
| 38681 | 456 | 6  | 749  | TTTCATTGCTGTTGTTAAAAGAAGAATTACTTAACAGGTGGATTTCCTTTTCCCACTC    | 37624 | A_95_P230384 EB429570     |
| 38683 | 456 | 8  | 412  | AGTCTTTGGACTCTTGATTTTTAAGTGAAGTTCTCTTGTGTTGACAGGTGCTTTGGTI    | 37628 | A_95_P214567 TA20289_4097 |
| 38684 | 456 | 9  | 392  | AGTCTGTCATAGTGTAGTTGAGTCGTTTCATGTCTTTCATTATCGTATTTCCCTTTGTAT  | 37630 | A_95_P095763 BP533329     |
| 38687 | 456 | 12 | 844  | GAGTGGCTCCTGAAAATTCGTGAATAATGCAACTATGAGCATAGATATGGGCCAG/      | 37636 | A_95_P253024 FG142932     |
| 38690 | 456 | 15 | 617  | TCCTTATGTTTGAAGATTAATGGTTTTGAAATTCGTTGGATGGGTTCTAAGTGGG       | 37642 | A_95_P258186 TA12136_4097 |
| 38693 | 456 | 18 | 818  | GTACCAGTTATGAAGTCTCCAGACTTTGGATAAGAGAAAAACACAAAGTGGATGGAC     | 37648 | A_95_P157277 EH615331     |
| 38697 | 456 | 22 | 232  | AATATTTTGTACTAACATCACTTTCCCCACATCCACATGCTCTGCAAAGATAGAAAAG    | 37655 | A_95_P038341 BP129248     |
| 38698 | 456 | 23 | 492  | ATTTTAAAAGAAAAGCACAAACAAAATGAAATATCTGCTCGGTTCTACACACGCCGGG    | 37657 | A_95_P284373 FG634129     |
| 38701 | 456 | 26 | 370  | GAGATATTGTTGTGGTGTGTTTTGTTTTGAACTTGCTATTGGGTGCACTCTAATTCTAT   | 37663 | A_95_P092713 BP531941     |
| 38705 | 456 | 30 | 239  | GACCATTGGGTCTCAAGTCATCATTGCAGTTTTTATGAAAACGTAGTAATTACAAGC     | 37671 | A_95_P163317 EH622329     |
| 38709 | 456 | 34 | 1445 | GCTAGCTAATTATGCACCTTTTAGCTTACTCGAGGGAAATTTGATAACAATGTTGATTC   | 37679 | A_95_P154222 EF051137     |
| 38710 | 456 | 35 | 193  | ATCGATGAACTTGAACGAAGCATCAACGATTTGAGAGCTGAAATGGGTCAAGATGG      | 37681 | A_95_P109797 TA16250_4097 |
| 38711 | 456 | 36 | 856  | AAGATGTTGGAGCAGCCATGCAATACCTTCAGTCCAAATCACTCTGCATCATGCCAT     | 37683 | A_95_P291058 EB680364     |
| 38712 | 456 | 37 | 821  | GAGGGATCCGGAACCTCAGAAAGAGACAAGGATGAACTCACTGCTATTACAGTTGCA     | 37685 | A_95_P115402 DV157585     |
| 38713 | 456 | 38 | 725  | CAAGTGTTACTGTTAGTTTGTAAAGACTAGTGTTCCTGAAACATCAAATGGATTC       | 37687 | A_95_P020891 DV158794     |
| 38715 | 456 | 40 | 484  | TAGCAGGTTTATTTCCGTATCACTCTTCTTTATTTGAACTGTTTGGGTGATTTGAGCT    | 37691 | A_95_P280228 AM822222     |
| 38718 | 456 | 43 | 961  | TATGGGAGTCTCTCCTCTGTGATTATTAATATCAACTATGACGATATGATAGACAGAT    | 37697 | A_95_P031601 TA16934_4097 |
| 38720 | 456 | 45 | 109  | GCTCTACGATCGAGACTCATAAGATTGAAGTGGTTAGCAAAAAGAAGACAAAGAGA      | 37701 | A_95_P120312 EB449849     |
| 38721 | 456 | 46 | 136  | AGGTTTGGCCTTTATTTGGTCATCTTTCTTCTATTGTTCTTGCTGATAGGTATGTAAT    | 37703 | A_95_P048611 BP131960     |
| 38722 | 456 | 47 | 777  | CGTGATCCTAATGAGCACAGCTACTGCAGTCAATATGACCTCTACCTTTGTTTTTGGC    | 37705 | A_95_P119772 DV999332     |
| 38728 | 456 | 53 | 822  | CAGAGTGCAGCAATTGAAGCAGTTGATCGCTCAATATCAGAACAATAAAACCGCTT      | 37717 | A_95_P249727 FG155326     |
| 38729 | 456 | 54 | 840  | GTTTTACCAACAACAATCTCTCTGTTGTGTTACAGACGAAATCGCTAAGCTCAAGA      | 37719 | A_95_P128677 EB428428     |
| 38733 | 456 | 58 | 210  | GTACTIONTGAATGACGACGACGAAAATTTATACTATGACTAGATGCCACTTGTGTT     | 37727 | A_95_P114282 CV021526     |
| 38744 | 456 | 69 | 1004 | GCCTTTGTGTGATGAGTCTGCAAACCTTAATGAACATGTTTCTGTTGCATTCTTATA     | 37749 | A_95_P186892 TA14225_4097 |
| 38747 | 456 | 72 | 418  | GTGTGGTAATGTCTGGCATGGTTTTGTAAATTGTGACAAAATTTGAAGACGTAAAGT     | 37755 | A_95_P309168 FG645001     |
| 38750 | 456 | 75 | 203  | GAAGGTGTACATATATGATGTAGATGCCTGGGTGTGGATCTAGTTTGTAAAATTTAA     | 37761 | A_95_P147132 EB451376     |
| 38753 | 456 | 78 | 663  | CTTTAAATATGTTTTGAGACATGGTGTGTTTTTCCGCCGGAACAGCTGCAGATCTGA     | 37767 | A_95_P202532 DV160679     |
| 38754 | 456 | 79 | 752  | GGATAGGGATTGATGAATGGTTACGCATCCCATCAGTTCAGATGTCTCTCATGCCGA     | 37769 | A_95_P289823 FG177300     |
| 38759 | 456 | 84 | 519  | TGGTGCTCCATTATCTTCCAAAAGTTGTAGTTGACATACTTATATACATGTTCAAGTI    | 37779 | A_95_P274383 FG634502     |
| 38760 | 456 | 85 | 774  | GAAGATGAAGAGGCTGTTGCAGTTCATCAGAAGAGGGGTAGAAAAGATTCTGTTTT,     | 37781 | A_95_P244272 DV158739     |

|       |     |    |      |                                                              |       |              |              |
|-------|-----|----|------|--------------------------------------------------------------|-------|--------------|--------------|
| 38761 | 457 | 1  | 395  | AGGGCTCCCTTTGGGCACTTGACTTTATCAGAATTGACAGAGCTACTTTTTCATTTTT   | 37782 | A_95_P269861 | FG625527     |
| 38762 | 457 | 2  | 699  | AGTCCTGAACTTGATGCGAGCTCTCATATCTATCTCTAATAATATCTTAAATGCCTGTC  | 37784 | A_95_P185387 | TA13901_4097 |
| 38765 | 457 | 5  | 1069 | ATCCTTTCCCTTGGTGGATCATGCTTCCTTTGAGTTCCTTTAGTTTGTATCAATAGAATT | 37790 | A_95_P163012 | AB281271     |
| 38767 | 457 | 7  | 211  | GAAAAAGAAGTCCAGTAGTAGTTCCTTATTTTACGAAGCTCCCCTCGGCTACAGCATI   | 37794 | A_95_P004020 | FG141290     |
| 38773 | 457 | 13 | 1060 | TCAAACGCTAAGAAAGATGTTATTCTATTTTTCAGTAGAGTGACGATCTTGCAACAAC   | 37806 | A_95_P182247 | TA13167_4097 |
| 38777 | 457 | 17 | 901  | TATTTCCAGTCAATTCCTGGAATCCAAATGGTTGCCTGCTCAACCCCTTACAATGCCA/  | 37814 | A_95_P187212 | DV161194     |
| 38779 | 457 | 19 | 606  | AAAGCATGTTTGCTGCTCTAAGAGTTCACCTTTACTCTCATTGAAGTCTTTTGTTTCC   | 37818 | A_95_P157712 | DV158956     |
| 38782 | 457 | 22 | 773  | TTCCTGAAATTGCTGGACAATGTGGCTATCTCTCCAGATTCTTTTCCAGATGGCTGCI   | 37824 | A_95_P013101 | FG134922     |
| 38793 | 457 | 33 | 2213 | TCATTTTGAGGAATCAATGAAGTATGCTAGGAGGAGTGTAGTGACGCAGATATTC      | 37846 | A_95_P101888 | DQ515925     |
| 38796 | 457 | 36 | 763  | AAAGATGGTTATGAATCTTTGCCGAGAGGCAGCTTGTCAACATTTTTTTCAGCGCCCA   | 37852 | A_95_P201437 | Z93770       |
| 38801 | 457 | 41 | 383  | TGATGTACTGGATAAATTGTCGGCGGCTTATTTCTTTTACTTTTATGACGTGAACTC    | 37862 | A_95_P108642 | CV018933     |
| 38802 | 457 | 42 | 1095 | ATAAATGAAGCGTTCTCTGTGGTGGCTCTTGCCAAACAAAAGACTGCTCAATCTCAATT  | 37863 | A_95_P012216 | AY748246     |
| 38804 | 457 | 44 | 398  | CATGGAATTAAGCCAACAGGTGTTGCTGTGGTTCTACAGTGTTACATATTCATTTCC    | 37867 | A_95_P138227 | FG167397     |
| 38807 | 457 | 47 | 819  | GTCATTTCTTGAGGCTTAGTTGTTGCTCACTTGATTATTTTGAACCTCATTGCATTCTT  | 37873 | A_95_P148477 | EB677823     |
| 38808 | 457 | 48 | 323  | AACTTGCTGCTGCTGCTGGTGATACTGTATCAATGGGGAGAGGAAGCTATAACTCTA    | 37875 | A_95_P154207 | FG163331     |
| 38809 | 457 | 49 | 612  | GATTATGGCCTTTTTGCTCTGCGACTGTCAATATATTCGTATATGAATGTTGCAAGTT   | 37877 | A_95_P029206 | TC72615      |
| 38811 | 457 | 51 | 406  | TTGCTGACTCGTACGAAGTCATTTATTTACCATTACCTTCATGCTCATGTCTGAGTAGT  | 37881 | A_95_P094138 | BP532581     |
| 38814 | 457 | 54 | 868  | GAGTTGGTTAGTATGCCACCACTTTCTGATGAACAGATTGTGGTATCGGTAAAGCT     | 37887 | A_95_P008266 | EB447962     |
| 38817 | 457 | 57 | 620  | ATGGACAGTTTTTGTGATGTTGCTATCCAATAGAAATGAACCAAATCAATTGTCTCC    | 37893 | A_95_P201782 | TA17496_4097 |
| 38819 | 457 | 59 | 589  | TGATGGTACAAGTGATTCCATACTAAAGCATAAACCTATATGGGCTACTTATAGCCAC   | 37897 | A_95_P118132 | FG158775     |
| 38824 | 457 | 64 | 422  | GTATGAAAGGAAGCTGATTTGGGCTGTAAACACGAACCTTATCAATATATATCTCCTCTT | 1861  | A_95_P000051 | FG625247     |
| 38828 | 457 | 68 | 228  | ATTGGTTCTGTGTGCCTAAAGTTGAATATGATTCTAACGGGTTTTGCTGCCATTTTTTC  | 37914 | A_95_P015826 | CV021776     |
| 38829 | 457 | 69 | 846  | TCTTTGGCTAGCTACGACCTCGAGTGTATGCATATTCTTGGATGAAAGAGATGTCACC   | 37916 | A_95_P274568 | FG163833     |
| 38834 | 457 | 74 | 193  | ACTTGATGACCAGCCGAGTATAAGAGATCCAGATTATCTACGAACAGGAGGACTGTC    | 37925 | A_95_P107607 | CV018461     |
| 38842 | 457 | 82 | 820  | GTGTGATCTTGCTATATATATCAGCATGGCTCGCTGTATGTCTCTGTCTGTATATGA    | 37941 | A_95_P268601 | FG144509     |
| 38844 | 457 | 84 | 622  | GATTTTGGAGCTTACTTACTCTAACAGTACTAATTAGGGGGGCTAGGGTTATTGGAA    | 37945 | A_95_P285108 | FG148198     |
| 38845 | 457 | 85 | 357  | TGGAGGGGTTCTGAGGAAGGGGTTTAAAGTGCCAGTAGTGGTGTATGCTTCCTTTTA    | 37947 | A_95_P065650 | BP136391     |
| 38848 | 458 | 3  | 788  | CAGTCAAGTTATATTAATGATACCGACTCTGTAACCCCTGCTTTTTCAGAGGGTTTTA   | 37787 | A_95_P186092 | TA14052_4097 |
| 38850 | 458 | 5  | 290  | GAAAACATATCCTGATGGTGCATTTGATGTTGATATTACAGTCCGGATTACTAATCCT   | 37791 | A_95_P070555 | BP192664     |
| 38853 | 458 | 8  | 1004 | CCTTTTGCCTGAGAACTGTCCAAAATCATTAATGTATCGACATTTGTATCTCTTTT     | 37797 | A_95_P117072 | TA16244_4097 |
| 38856 | 458 | 11 | 743  | GGTACGGTATTCGAAAATTTAGCATATCGGGAGATTTTATTATGCTCAAGAGTTGAA    | 37803 | A_95_P219912 | EH617181     |
| 38862 | 458 | 17 | 1113 | CCTTGGAGGAATCGAGATTCATGGTTCATTAATATCTTGTCTCACTATTCTTTATCTT   | 37815 | A_95_P016541 | TA16072_4097 |
| 38867 | 458 | 22 | 685  | CTGCGTCTTTTCTTGACTGTGTTTATGGTCTAGCACTAAATGTTTACCATTTGGAAA    | 37825 | A_95_P148482 | EB677824     |
| 38873 | 458 | 28 | 303  | CTATGCTGTGTAACCTCAATTCATTTTCGTTTCCATGGTTGATGGTACCTCTGACC     | 37837 | A_95_P092488 | BP531833     |

|       |     |    |      |                                                               |       |                           |
|-------|-----|----|------|---------------------------------------------------------------|-------|---------------------------|
| 38874 | 458 | 29 | 495  | TTTTGGGTTTGATAAACCCCTGGTGATGAGGTTATCCTGTTTGCTCCTTTCTATGATTCT  | 37839 | A_95_P127292 EB427335     |
| 38877 | 458 | 32 | 472  | AGGTATAGCCAACAAAACCTAAATCTTCGGGAATCAGACGTTCTTTCTATGAGGTCC     | 37845 | A_95_P264706 AM833236     |
| 38880 | 458 | 35 | 518  | GACTCTACAAATCTTAGTTTTGCTGTTATTGGGGATGTTTCACCAGTCTCTGAATAG`    | 37851 | A_95_P215927 TA20593_4097 |
| 38885 | 458 | 40 | 865  | TTGATCTCCTGTTACCCTTGAACATAAAATTTTCTTATCCCTAAACGTGTAGTTGTACCA/ | 37861 | A_95_P008841 EB427847     |
| 38889 | 458 | 44 | 246  | TTTCAGCCATGTAGATATGCCGGGTATCCCAAAGGAAATCGCCATGCACAAACTGAA     | 37868 | A_95_P192887 BP130642     |
| 38890 | 458 | 45 | 509  | ACTCTGTATCCTATTCTATTACGCTATACTTTACTTGGGGAGTTTTAACTCGTTTTTAC   | 37870 | A_95_P133612 EB435249     |
| 38892 | 458 | 47 | 532  | CAACTCTTTGGCGTGCTGCTGCGTCCATATTCAAAGATGAGAGTCTATGTAAATCTAA    | 37874 | A_95_P039396 BP129535     |
| 38893 | 458 | 48 | 753  | CCAAATTGGTACCTGCATTGCTTTGTAAGTTAGATATCTTTCAGTTCTAACTTCTGTA    | 37876 | A_95_P190592 TA15048_4097 |
| 38894 | 458 | 49 | 233  | GCAATTGAAGATCAGTTACCTTCTGTTAATATTAGTGAACCCCTCATGTTATTGACA/    | 37878 | A_95_P155282 EG649993     |
| 38898 | 458 | 53 | 649  | GAAAAAATACATCAAACCGTGTCACTTGTGCAGATAATGAAAGTTGCTTTCATACG`     | 37886 | A_95_P149457 EB679293     |
| 38905 | 458 | 60 | 309  | ACAACCATAACTTTTTCTTCTGTGGAAAAAGTGGTGTGGTGGTGGTGGCGGCGGAA      | 37900 | A_95_P038926 BP129406     |
| 38906 | 458 | 61 | 802  | GCAGAACAGTGGATTAAGTCTATCATTAGCTGGATCTGATGGACGATTTCCGGGGTTG    | 37902 | A_95_P225892 FG143737     |
| 38910 | 458 | 65 | 1077 | TGGCTGCAGCACACAGCTTATCATATTCAGACCAGACTTGATTATTGTGTAATTAACA    | 37909 | A_95_P019406 TA14241_4097 |
| 38915 | 458 | 70 | 460  | ATAGCAGAGTTTTGTGTATTAGCCAGCCTATTCATCCATTTATTATTATGTGTACTTA    | 37919 | A_95_P089863 TA17504_4097 |
| 38919 | 458 | 74 | 270  | TCGGACTTTTCGATCATTGCTTAATTAACGGTCGTCCTCGGGACAGTGATCTCATTTCA(  | 37926 | A_95_P063210 BP135715     |
| 38920 | 458 | 75 | 805  | CTGTTCTCCACAGCTTCCCTATTTGCTAACTTGGTTTAAATAATTTTCTGTGCTACTCA/  | 37928 | A_95_P150842 EB680967     |
| 38921 | 458 | 76 | 310  | TTTCCAGTCGAGGTCAGTGTGAGTCTCAGATTCATGTAAGTTTTCATTTTTGGCCTC,    | 37930 | A_95_P099133 BP534804     |
| 38925 | 458 | 80 | 835  | ACCTCTCGGGAGCTATGCTTCTTTTCTCAAAGAGAAGAATGAGAAGAGAGTCTCAAC     | 37938 | A_95_P218002 TA21073_4097 |
| 38926 | 458 | 81 | 540  | TTCCTTTTTTCTGCCAATACGTGAAGCTGAAAATGAGTTTCTCTCGTCAAATGCATAA    | 37940 | A_95_P040806 BP129928     |
| 38932 | 459 | 2  | 357  | AGTTTGTAAATGCTTGTCCCGTAATGTTCTCCAATTTTGAGTTTGTGCTACAAAAGCA/   | 37951 | A_95_P143572 EB446834     |
| 38933 | 459 | 3  | 200  | CTCGAGTTGTAAGTGAATTATGCGGAATTTGTAGTTTTTATGTTTGTGTTTGTATGCG    | 37953 | A_95_P128757 EB428492     |
| 38937 | 459 | 7  | 422  | GAGCACTTACTAACTCACATACAAGTAGGCTTTGTTCTAGTCTTGTAGGAATTAGTTT,   | 37961 | A_95_P266936 TC69181      |
| 38938 | 459 | 8  | 813  | CGTAGTCTACATAGTGGTTGGTTTGTAAATGAACAATGGCTGGTGTATGCACAATGTTT`  | 37963 | A_95_P146362 EB450395     |
| 38941 | 459 | 11 | 449  | TCAACAAATGTCGGTACAAGTTCTTCCATTTAGCAATTATCTTTACTCCTTTTAAACCTC  | 37969 | A_95_P264551 AM830869     |
| 38944 | 459 | 14 | 765  | CGTTTTTGCAACTGTCATATTTCCGTTGGCTGCTAATGTAATGTATTTCTAGCCAAAA/   | 37975 | A_95_P115827 DV158198     |
| 38948 | 459 | 18 | 417  | AATGGTCAATGGTACAAAAAGATGATACGTTGTTTGCACATTTAGGTTTATGTTCCCA    | 37983 | A_95_P005656 BP133446     |
| 38950 | 459 | 20 | 0    | AGTAGCATCTGCATCATCAGATGGATCATACGTGTTGGGATGTCGCATGACTAGAAG     | 37987 | A_95_P260221 A_95_P260221 |
| 38951 | 459 | 21 | 935  | TTTCTCTTTGCATATGCACTTGGAGCAAATTTGGAGTCTTAATGCAAGACTCGCCCAT,   | 37989 | A_95_P223152 TA22189_4097 |
| 38956 | 459 | 26 | 827  | ACATCAATCACAAAGGACGCAACACTTACATCTGAACATCCAAAATTGATGGTAAATC    | 37999 | A_95_P120032 DV999704     |
| 38957 | 459 | 27 | 759  | GCATTCAAGACTGGAGTTGTTGCTATTGTACGCTTTTAAATAAGAGAGTAACGTGTCTT   | 38001 | A_95_P136142 DV157807     |
| 38958 | 459 | 28 | 302  | ATGCTTCTGCATCTCAGTTCATTCTCGGGCAACAAATAACTTTAGCACTATGGGCTG     | 38003 | A_95_P106492 CV017920     |
| 38961 | 459 | 31 | 1012 | CCTTCGTTCTAAGTTCATACATTCTTATTAACCCTTTTCAAAAATGATGATGGGTACCC   | 38009 | A_95_P258571 AB286178     |
| 38962 | 459 | 32 | 886  | TGAAACTGCAATTGAGGACTGGATTTGGTCAGTTGGATGCAACCCCTATCCATCACI     | 38011 | A_95_P228824 DV161409     |
| 38963 | 459 | 33 | 453  | AGTATGGTGGGACTGTGTTGCTAAGGAGGAAGAGATCATATATACATTGCTGTTTTT     | 38013 | A_95_P032086 EB445389     |

|       |     |    |      |                                                            |       |                           |
|-------|-----|----|------|------------------------------------------------------------|-------|---------------------------|
| 38967 | 459 | 37 | 907  | GCGACTTGTTTCAAATTTAGTGGCTTTGTCTTTTCTCATGGGTTCTTCTTGCTATC   | 38021 | A_95_P222352 TA22015_4097 |
| 38974 | 459 | 44 | 455  | CACCTTTGAACTCATTACAGATCTGCAGCGTATTATATGCAGTTCGTTCTTCTTCA   | 38034 | A_95_P026296 BP528192     |
| 38979 | 459 | 49 | 772  | ATGTGATCAGGAGAATGCTGCAGACTGGACATCCAATATGCTCAGCTGATTGGAAA   | 38044 | A_95_P226204 EB450391     |
| 38980 | 459 | 50 | 113  | GTGCTAGCCAAGGAGGAGCTCCAAAACATTATATTTATCTTTGTTCTTTGTGCATTT  | 38046 | A_95_P107602 AM800292     |
| 38984 | 459 | 54 | 776  | CTGAAGGCAACTAACGACATCAGATTCAGATGTCACTATAAATTACAAGAATATTTG/ | 38054 | A_95_P123137 DW003043     |
| 38985 | 459 | 55 | 417  | CAGGTGTGCAACGTGCAGTTATTCTATTCTGTACCAACGTTCAAAGTGGTCTCATCTC | 38056 | A_95_P073955 BP526350     |
| 38987 | 459 | 57 | 768  | CAAAATGGATAGAGGAAATGAACAAGGTTGATGGTTACAAGCAGACAAAAGTTGAT   | 38060 | A_95_P249167 EB679935     |
| 38993 | 459 | 63 | 757  | GGCTTGAGTGGGTAGGACTGCTAGATGAAATTACCTTTTATTATCAAATATCCAAATI | 38072 | A_95_P216627 TA20747_4097 |
| 38994 | 459 | 64 | 1023 | GGCATTGCTGTTGAATTATGTGTTCCAAAAGTTTCTAGCCGTTAATGATCTTTGTTAC | 38074 | A_95_P030936 TC74235      |
| 38995 | 459 | 65 | 778  | TTAACTGCTGTTGGAACCAAGGGCACGTTACACCTTACGACTTATCATCCCTTTTG/  | 38076 | A_95_P148707 EB678167     |
| 39003 | 459 | 73 | 919  | CTCCTAAAGTGAATTATGACGTTGCAAAATTTTTCCCTCTCCTTGAATACTCATCTG  | 38092 | A_95_P245952 EB680458     |
| 39004 | 459 | 74 | 621  | AGTTTTTCTAAAAAGACAAGGGTAAAGTGTGAAGGGCTTATTGGTCTCTTTGGAT/   | 38094 | A_95_P220152 BP133134     |
| 39006 | 459 | 76 | 458  | GAGGTAAGGTATATGTCCCCTCTTGTATTTGACATGTTAATAATACTACAGGTCTG   | 38098 | A_95_P213272 TA20012_4097 |
| 39009 | 459 | 79 | 513  | GGATAGGGGTAAGGTCTGCGCATACTATCCTTAACCCAAATCCTACTTGTAGGAA    | 38104 | A_95_P105772 CV017611     |
| 39013 | 459 | 83 | 835  | GTAAATATACTCGTCGCTCTTTATCTTGTATCACTTTCAAGGTCTTTCCCTGCTCCCT | 38111 | A_95_P313153 FG155155     |
| 39017 | 460 | 2  | 571  | ACACAGGGCGTTTCCATTTTCTCTGACTTGAAACTCTATAGAGATAATCTTGCTAATG | 37952 | A_95_P046021 BP131287     |
| 39018 | 460 | 3  | 404  | GTCTTTGAACAAAAGACCACTTTGATTTCTTCTTATAACAGATCCAATGAATGGAG   | 37954 | A_95_P036418 BP128726     |
| 39019 | 460 | 4  | 666  | GCTGTGATGATTTTGTGCATAATCTTTACAATGTGGCTCATAGGCTTCCGGTAATTA  | 37956 | A_95_P136807 FG157644     |
| 39023 | 460 | 8  | 808  | ATAAAGCAATTGGAGAAAATGGTTTCAAAGTGTACCTTCTCCGTTTGAGCCCTTT    | 37964 | A_95_P130617 TA17898_4097 |
| 39027 | 460 | 12 | 818  | GCTGTTTGTGTTGCTAGTGTGTAAGTTAACATGGTCTACTCATGCTTGAATA/      | 37972 | A_95_P247472 EB426399     |
| 39029 | 460 | 14 | 0    | CCGTTCAAGCCATATCTAAGCTTACCACCTACTTGGCTCATTGAGTTGAAGATCTTGA | 37976 | A_95_P315623 A_95_P315623 |
| 39031 | 460 | 16 | 577  | TATTCAGAAGTTTTGTTAATTCAACTGTCCCTTGTGTTACCCTAAACCTGTTTCTTCT | 37980 | A_95_P143602 EB446852     |
| 39035 | 460 | 20 | 213  | GCATCTTGTCTCCGTATACACAGATTGCTCGTATAGTAATTGGAATGATTTTGC     | 37988 | A_95_P209392 TA19180_4097 |
| 39039 | 460 | 24 | 762  | AGTGCATAAGCCGGTTAGTTGAGGAGTTTGTGAGCAGAGGAGTCAAGTATTTGGTGA/ | 37996 | A_95_P135347 EB438738     |
| 39043 | 460 | 28 | 799  | ACAACATACCCAGTAAATCACACTAGTGAGGTCTGAGTATTTTTCATAGCTTACTTTG | 38004 | A_95_P119832 DV999443     |
| 39048 | 460 | 33 | 398  | GCAATTTGCTCTTGAATTTGATGGAAAATATTGCTGCGCCATGTTAGGCGCTTTCTG  | 38014 | A_95_P029056 EB443749     |
| 39051 | 460 | 36 | 781  | ATGTGCAGATGGAGGGTCAAAGCATTAGAAGATATGAGGGAATTAGGTTGGAAGC    | 38020 | A_95_P253059 EH621755     |
| 39054 | 460 | 39 | 345  | TTTTGTGCATCAACTGGCTGAATTGATCAAGTTGGGATTCATCTGGGAATTCGATG/  | 38025 | A_95_P083820 BP528864     |
| 39057 | 460 | 42 | 725  | GAAAGAGCACACTTCTGAGGCGTAAATCTTTGAATGCGATGTGTTAACTTCTCCTCG  | 38031 | A_95_P273656 FG186025     |
| 39069 | 460 | 54 | 446  | TCTAGATTGAATACATAGCAGAGGTTTGTGTATTAGCCAGCCTATTCATCCCATTAT  | 38055 | A_95_P201822 TA17504_4097 |
| 39072 | 460 | 57 | 432  | TGGCGGCTTGTAATATTTGGCCTGTCTTGGTAATTTAAGTGTATTAATAGCACTAT   | 38061 | A_95_P162047 EH620787     |
| 39074 | 460 | 59 | 583  | TGATTGATGCACCTGGCGACAGTTTGAATTTATGGAATTGAATGAGTCTATCTTGC   | 38065 | A_95_P141082 EB451357     |
| 39078 | 460 | 63 | 581  | AGTGCCTTTGGATGGAGATTTATTAGCTAGTGTACATCCCTGCGTCTTGTTCATTTT  | 38073 | A_95_P201732 FG168935     |
| 39079 | 460 | 64 | 534  | CCCCCTGCAAATTCATCCAAGAGAAAAGTGCAACAGAGAAAATTTCTCGAGATGAAT  | 38075 | A_95_P140542 EB444438     |

|       |     |    |      |                                                               |       |                           |
|-------|-----|----|------|---------------------------------------------------------------|-------|---------------------------|
| 39082 | 460 | 67 | 386  | TTCTGAAATTGCAGAGGCATTGGTTTCGATCAAGCCGCTGAGTATTGGAAACAGGCTA    | 38081 | A_95_P047176 BP131588     |
| 39084 | 460 | 69 | 365  | TCACATGACGCTGAACATGATTTACCCGGAGACTCACTCAACAGTGCTTGAAGTTAT/    | 38085 | A_95_P074185 BP526401     |
| 39087 | 460 | 72 | 589  | ATGTCGGAAATCCATGTTTGGATCCTAACCGCGGTTTGTGCCGTTTCAAGAGGATTC     | 38091 | A_95_P031711 BP133329     |
| 39103 | 461 | 3  | 179  | GTCATATTTGACTCAGCTTATATGCGGACATTATGATGTATGTGCTACTGATATTTCCI   | 38121 | A_95_P132902 EB433714     |
| 39108 | 461 | 8  | 541  | TAGCATGACACCCTGAGAAGTACTGGATTGTTTCTTTTATCACGAGAATCTTAATAAA    | 38130 | A_95_P029731 BP136973     |
| 39110 | 461 | 10 | 839  | ATATAGACGATGTTCTGATTCACAGGCACATCTGCCACCTCGCAGGTCAATTGTCTGAT   | 38134 | A_95_P283048 FG152355     |
| 39112 | 461 | 12 | 647  | GACATATATGTGACTGTTACCAAAATCTGGGGTGCTTTCTCAATATAGCTAAATTGT     | 38138 | A_95_P026706 TA20202_4097 |
| 39113 | 461 | 13 | 600  | CCGGGCTGCCCATGTCAATAAAATTTTGTGAGATTTGCATCTTCAGTATAGGTGC       | 38140 | A_95_P001226 FG644966     |
| 39114 | 461 | 14 | 660  | GAAAGATTAGAAGTGCTTGCAGAGAAGCACAAACGTGGAGAAGCAGCAAGATTTAT      | 38142 | A_95_P250227 EB680783     |
| 39115 | 461 | 15 | 737  | GAACATCTCTAGACTACGATATTGTCTCTTTCTTTTAGGTGTGATTGTCATGATCTCTA   | 38144 | A_95_P014711 DV162480     |
| 39126 | 461 | 26 | 689  | CGCTCTCTTGCTTTCTCTTATGCAGCTTTCATTCCAAAAGGTTTTAAAGAAAGAAACAT   | 38165 | A_95_P307553 FG638693     |
| 39130 | 461 | 30 | 1427 | AATAAGGAAAGAGAGTTAGAGAGAGAAATGCCTTAGCAACGCAACGCAACGCAACC      | 38173 | A_95_P189082 TA14714_4097 |
| 39131 | 461 | 31 | 280  | CCACCTTGGGTTGCAGTGACTACATAAAGCAGCGATGCACATACTTATCCAAAACAA/    | 38175 | A_95_P039846 BP129666     |
| 39134 | 461 | 34 | 299  | GCCCAAAGATGGGCAAGAATTTGGTTGTTTTCTCTTTCATATGTAATGAATGTATTA     | 38181 | A_95_P162702 EH621693     |
| 39137 | 461 | 37 | 423  | GGTTTTACATTGCCATTGTTGTCTTATTTGGTGACAAGATATTACGGATCAATACCCC    | 38187 | A_95_P033324 AJ344616     |
| 39143 | 461 | 43 | 465  | GGAGATTGATACTTAACCTGTTATCACAATGGTAATACGTCCCAATTTCTTTTAGAC     | 38198 | A_95_P095983 BP533417     |
| 39147 | 461 | 47 | 778  | CCTGTAATAAGATTTTTCGTTCACCTTTTCTGCCAGTGTTATCAGTTTAAAGTTGGAT    | 38206 | A_95_P190247 TA14969_4097 |
| 39148 | 461 | 48 | 1310 | AGGGTGTGTTTCAGTGGTACCATTCAACAATAGCAATGCCATTTTTGTTTGTGCAAAA    | 38208 | A_95_P238099 AF191497     |
| 39152 | 461 | 52 | 529  | GCTACTTCTCAAACATGACCCAGAGGACTGTTAGGGACAAATTTGCTCGTCTAACCC/    | 38216 | A_95_P222452 TA22036_4097 |
| 39153 | 461 | 53 | 573  | TTCAAGTGGACTAACGTACAGAAGATCAGCCAGATCTATGCTGACTGGATTGAAACG     | 38218 | A_95_P235734 BP131939     |
| 39160 | 461 | 60 | 852  | GTTTTGCCACTACTTTGGTTCAGCTGCTTGTACAATTTCAATATTTCAATACATTTCCAGT | 38232 | A_95_P110122 TA12996_4097 |
| 39162 | 461 | 62 | 861  | ATTGGCAGTGTCTTTGATCCAAGTACGAGGGACCACATACAGAGGCTAAAAAAGATC     | 38236 | A_95_P247687 EB441414     |
| 39163 | 461 | 63 | 753  | CCATGACGTTAATGTTTCTTCACAATCTATTTACTTTCTCGAAGCTCCTACTATGTCTA/  | 38238 | A_95_P187312 AB079020     |
| 39167 | 461 | 67 | 767  | TTCCATCGCAGAGTGTTAACTCCAGATTTTGTCTCGAGGTCATTGAGTTGATTATCTGT   | 38246 | A_95_P149332 EB679168     |
| 39168 | 461 | 68 | 735  | CTCCCTCTGTTGTAATGTAATGTGGTGAATTCTACATTCAGGTTTTCATCATTAGTGA    | 38248 | A_95_P117362 DV160260     |
| 39169 | 461 | 69 | 856  | TTTACCAAGGTCATCATGGTGATCGTGGTGTATATCGTGCCAATGTGATTTTGCCGGC    | 38250 | A_95_P228909 DV161164     |
| 39170 | 461 | 70 | 339  | ATAGTTGCTCTTCTCTTTGGAATTCAGTGTGAGGCTATCCTTCTGCTTGTATTTACTTC   | 38252 | A_95_P081525 BP528277     |
| 39174 | 461 | 74 | 487  | GTGGGGAGAAAGGAACAAGATAGATCTGATTGTGAACCTGGTCCACACCCTGGTTAA/    | 38260 | A_95_P087708 BP529862     |
| 39181 | 461 | 81 | 399  | ACACCGTAGTAGCTTTAAATTTCTGATGAACTTGGGATGCTGTATTCAAATACCTTTG,   | 38271 | A_95_P022811 TA18295_4097 |
| 39182 | 461 | 82 | 751  | GTAACATAAGAGATAACAGTAAACATAACAAGTCTCTTCTTAGGAGCTTATGAAGAG     | 38273 | A_95_P253449 EH621440     |
| 39183 | 461 | 83 | 711  | CTCAACTGTATTACTAACTTTGCCTTCCGTTGGAAGTTGGCAACAAAAATGTTAGCG     | 38275 | A_95_P211117 DV158613     |
| 39184 | 461 | 84 | 574  | TTCCTGATAAGCAAGCCTACAGGTGCCTGCTTTGTTCTAATATCCATTCCGTAATCATC   | 38277 | A_95_P005331 BP130890     |
| 39189 | 462 | 4  | 346  | TATCTCTGTAAGGTTTCAGCGATGTTTTGAAGGACTAAGCAGTGAAGGAAGCCTTTT/    | 38124 | A_95_P098958 BP534709     |
| 39198 | 462 | 13 | 379  | ACTCTGACTGTAGCTAGGACGTAAATCACATCTTCTGACTCTCCCTCAGCTGATTTT     | 38141 | A_95_P259791 EG649515     |

|       |     |    |      |                                                               |       |                           |
|-------|-----|----|------|---------------------------------------------------------------|-------|---------------------------|
| 39203 | 462 | 18 | 460  | GAGGGAGAGGAGATGAACAGATCAGTTCTTTGGGAGATACTGTGGATAAAGTACA/      | 38151 | A_95_P073405 BP526206     |
| 39204 | 462 | 19 | 696  | TATTGGTTGATCGGGAGTAATTTATCTTCGAGAAATGTTGAGCGCCTCTGCAATTTTA    | 38152 | A_95_P186842 TA14213_4097 |
| 39205 | 462 | 20 | 253  | TTCATTTGTCGTAGTAGTCATTGGCTCATCTCTGTTCCAAATAATAAGGACCGCAACC/   | 38154 | A_95_P114067 CV021429     |
| 39206 | 462 | 21 | 656  | CTACCAAGACTCCGTGATTATTTAGAATCTTTAAAGGGTTCTGGTGAACCTGTGCAAT    | 38156 | A_95_P284653 FG641345     |
| 39208 | 462 | 23 | 399  | ACATTGAAGAAAACGCGTTCAGGCCTGGTGTAACCAATTGGCTTGACAAAAGTGCT      | 38160 | A_95_P091213 EH665799     |
| 39212 | 462 | 27 | 269  | CATACTTTTAGGGATTCCACTGAGAAGCTTCATTCTGCAAAGAGGGAACTTGCACT/     | 38168 | A_95_P217787 TA21018_4097 |
| 39214 | 462 | 29 | 654  | TCCTATGGCCTGTCCCAGTTAATTCCTACCCTGCTCGGTGTATTGATGTTGCATATTA    | 38172 | A_95_P053931 BP133312     |
| 39218 | 462 | 33 | 134  | GTTCTCGACTTCAAATTTTGTAAACAGTCTACTATCAGGACAATCAGTAGTGCAAT/     | 38180 | A_95_P133077 EB434145     |
| 39219 | 462 | 34 | 919  | AAGGATGCAACTGAGAGCTCACATGTGTATGAGCTATACGCAATAAGCAACCATTAT     | 38182 | A_95_P261411 DV161227     |
| 39223 | 462 | 38 | 776  | TAACGGGGAAATTTCCCGTCCAATTTCTTGCAACAAGGAAAAGGAAAGTGACACGGAT/   | 38190 | A_95_P026161 EB425857     |
| 39224 | 462 | 39 | 988  | GTTCTGGTAGATGCTGAGTCTGCACTGACTCGTTATAAATGTTAATGATCTATTGG      | 38192 | A_95_P185057 TA13833_4097 |
| 39225 | 462 | 40 | 881  | GATGCAAAGCTCAATTTTGACGATAATGCTGCTTACCGTCAAAAAGAAATCTTTTCTC    | 38193 | A_95_P008511 TA13724_4097 |
| 39227 | 462 | 42 | 387  | ACAGGGGGCGGTCTTTCTACTGTATGAATAAATAACATAGATATTTCACTATCATTGAC   | 38197 | A_95_P134827 EB437665     |
| 39229 | 462 | 44 | 731  | TCTCAGTCGAATATTTGGAGCAAAACACTGTATCCGTTGATTCTCTACTCTATTA/      | 38201 | A_95_P313183 FG155257     |
| 39231 | 462 | 46 | 620  | GCTGGGCCAACGTTTATTGTATTGACGTTTAGGCTTCTTATATCAGTTTGCTGTAGAT    | 38205 | A_95_P222337 TA22012_4097 |
| 39235 | 462 | 50 | 450  | CCTTTTGGTTCTATCGGAGACCCGTTTCACTGACTCGCACATGACTGGATTTATAGAAC   | 38213 | A_95_P123907 FG139259     |
| 39237 | 462 | 52 | 112  | CTCGATCACAGCCATTAATCTATCAGATGGTGTCTTCTCCAGCATTTTACTGATAATT    | 38217 | A_95_P164467 EH623707     |
| 39238 | 462 | 53 | 563  | CTTCTTCTTCTTCTCATATAGTTGGTTTTATTAGAATATGAATGGCTGTGGCATACTG    | 38219 | A_95_P016831 AB015760     |
| 39244 | 462 | 59 | 2122 | GTGCGTGCTACCCAAACAAGATTAGTAGTTGAAATAGGTTTGATTCTGTATATATCC     | 38231 | A_95_P017546 TC47444      |
| 39251 | 462 | 66 | 278  | ACTTCAAAGGTCATAAGAATGGTATAAGGGGAAGATTGGATTAGTTTGGTAGATCG/     | 38245 | A_95_P033959 AJ717944     |
| 39252 | 462 | 67 | 268  | GTTAGTGTAATCTAACTTTCATGCGAATCCCAACATAGTGTAACAAAAGCTCGATCAT    | 38247 | A_95_P141927 EB445533     |
| 39253 | 462 | 68 | 677  | AGATTGCCAAAAGGCAGGCTGCATTCTCTCTTACGACCCAAATCTAAGGTTGCCCTT     | 38249 | A_95_P292118 FG201107     |
| 39254 | 462 | 69 | 586  | TTTGTTGACTTGACATTCCTTTCCCTCTCTGCAATGATGTTCTTGAATTCTCTGATC     | 38251 | A_95_P162232 EH621123     |
| 39259 | 462 | 74 | 1742 | GGCCCTAAGTTGATTGTCCTGACTGGATATTTAGTTTCTATAGAAAGATAAACGTTTCAGT | 38261 | A_95_P013386 TA12466_4097 |
| 39260 | 462 | 75 | 533  | TTTTGCTGGGTGAGGCTCAGAGCATTATTGCTCTCGATCTCTTGACCAGTTGGAAAA     | 38263 | A_95_P052801 FG199640     |
| 39263 | 462 | 78 | 390  | AATTCATACAGATTGTGAAAAACTCTTACTGATCTTGAGCTTCTGTATCTGACTC       | 38267 | A_95_P105862 TA12574_4097 |
| 39269 | 462 | 84 | 766  | GAATGACAGCGAGTGGGCTTTGTTTCTAGAGAAGTTTGAAGAGCTGCTTACCCAGC      | 38278 | A_95_P149567 EB679467     |
| 39270 | 462 | 85 | 704  | GCTTCAATTGTATGAAAGCTGTCACGTTGGGTTACCAGTACAAGGGAATTTATCCTT     | 38280 | A_95_P143717 EB446936     |
| 39271 | 463 | 1  | 620  | AAGGAACTAGAGCGTTTTTGCTGTTCTAATTTCACTATGGCATTATCTTTCCGCCTG/    | 38281 | A_95_P303388 FG134173     |
| 39273 | 463 | 3  | 209  | GCTCATTCAAATCTTAAATGAGTCATCTGGGATTCTTCAATCGAAAATTGATAGG/      | 38285 | A_95_P210392 TA19387_4097 |
| 39278 | 463 | 8  | 849  | GTTATGTGCATTCTTGTTCACATGGCTAACATCCATGAAAATTGTAATTTGGCATTG     | 38295 | A_95_P236239 DV160810     |
| 39280 | 463 | 10 | 1691 | CTAATTAGCTTCACATTTCTTAAAGATTTGAGTAATCTACTTGGTTTTGTCGGGTTGAC   | 38299 | A_95_P192752 TA15522_4097 |
| 39283 | 463 | 13 | 551  | GTTGTTCTTTGTTGTTTGTAAATAACTTTGCATCCATGTGAGATGTAGTAGGAAAGTG    | 38305 | A_95_P209772 TA19261_4097 |
| 39284 | 463 | 14 | 453  | TTGCTCCTTGCTTTTTATAAGTGCTCATGGATTTATGACAAGGTCAGGTATCAATAA     | 38307 | A_95_P139812 BP534904     |

|       |     |    |      |                                                            |       |                           |
|-------|-----|----|------|------------------------------------------------------------|-------|---------------------------|
| 39293 | 463 | 23 | 855  | GCCAAGTGAACTTTGCAATTTGTTTTGGACAAGTTTATTGCGTTAGACCAATGGT    | 38325 | A_95_P248497 TA13181_4097 |
| 39294 | 463 | 24 | 648  | CTGACTTGATAGCTCGAACGGCTTATGTATTTTTATTTGGTGTGTTTATGAAATCAGC | 38327 | A_95_P159347 EH617446     |
| 39298 | 463 | 28 | 561  | CCAAAGATGCGAAACAGTATGCATCGAGGATGAAGATTGTGCATGCCCAATGTGCA/  | 38335 | A_95_P060025 BP134894     |
| 39299 | 463 | 29 | 417  | ATCCCAGACCTTCATCAGATCTAAAAAGGGTCTTAAGGTTCTTGATATGTTATCATTI | 38337 | A_95_P033644 AJ632880     |
| 39301 | 463 | 31 | 839  | ACTCGAAATGCATAGATTCAAGTAAAGCCATGATGATGCTGTGAACTCTTGTTGTTG. | 38341 | A_95_P313143 FG155134     |
| 39302 | 463 | 32 | 718  | CGCACCAATCTCAAGTTGCTTTCTTCTGAATTATTCTTGTGACAATCTGAGTCTTTTT | 38343 | A_95_P217707 TA20994_4097 |
| 39306 | 463 | 36 | 833  | CTTGATTAGTAGAATGCAGTACACTCCAGGAAAGCTAATTAAGAATCTTGGGTCTTC  | 38351 | A_95_P141147 EB679902     |
| 39307 | 463 | 37 | 585  | GAAGAAGAGGTGAAAAACACTTGGCAGACAATGCCAATTTAATATCATTCTCTTATC  | 38353 | A_95_P244232 FS411833     |
| 39310 | 463 | 40 | 469  | GACCGTGATGGAGTTATTTAGCATGCAAAAATTGCGCAAAGAAAGTAGACAGAGG    | 38359 | A_95_P080650 BP528056     |
| 39322 | 463 | 52 | 780  | AGGAAGCAAATAGGGTTTCAGAACTCAATTTCTCCATGAGCTCGTACTAGGTTAA.   | 38382 | A_95_P136067 EB439639     |
| 39323 | 463 | 53 | 557  | GTTTCATCTGAAGCCGTTCTTGAGTCTATGCTGTGCGAAAAGAGGTCGTTGTTATCTT | 38383 | A_95_P042181 BP130292     |
| 39334 | 463 | 64 | 630  | TATTTTCCAAGTTTCAGTGGGTTGGGTATAAATCAACCACAACCCTTTTATCAGAA.  | 38405 | A_95_P228379 FG638986     |
| 39337 | 463 | 67 | 856  | ATGGTGCCTCAATAGAAGTTGCACAGTATAATCCACCATTTACTCTCCGTTACACGC  | 38411 | A_95_P196732 DW000294     |
| 39340 | 463 | 70 | 866  | GGTTGATGATGAAATGTGTCTCTCCTCCCATCGTCAGATCTGAAATATGTGACTCTT  | 38416 | A_95_P254954 FG160502     |
| 39344 | 463 | 74 | 102  | GGGAATCTGTCGTGTTAACCTAGTGTACTTGTATACATTAGCCATTGACTCGCAAAA  | 38424 | A_95_P257359 EH623173     |
| 39349 | 463 | 79 | 387  | AAAGAGATTGTTGGATCTTTGCTTGGATCGCATCCGCAAAGCTTGCAGACAAGTAA   | 38434 | A_95_P170366 AJ421413     |
| 39350 | 463 | 80 | 535  | ATGGGCGATTATAGGAGCCTAACTAATTTAGTAAATAGTTGTTGGTACTTGAGTT    | 38436 | A_95_P209562 TA19217_4097 |
| 39351 | 463 | 81 | 832  | TCGGAGTTGGAATTCAAACTTTCAGCAGTTCTCTGGAATCAACGGTGTCTCTATTA   | 38438 | A_95_P282263 EB682554     |
| 39356 | 464 | 1  | 782  | TAGGATGATTTTGAGATCTTTCAGTGTGTAAGTCTTCCCTGCTTAAATGATTGGGTI  | 38282 | A_95_P000616 TA12414_4097 |
| 39358 | 464 | 3  | 646  | AGGAAGCTAAAAGTTTTGCGGTTGGGAACAGAGCTCTTGCTGCTCTGTTGTACATA   | 38286 | A_95_P144917 EB448475     |
| 39362 | 464 | 7  | 267  | CGAAGCAGTTGAACCATATCTAGAGCTATAGTTCTATAGTATCTTGAATATATGGGT  | 38294 | A_95_P070585 BP192672     |
| 39363 | 464 | 8  | 714  | CTCAGAGCAGCTTATTTTGACGACAGGCTTCCATTAATAATTCATTCTGCAGATTATG | 38296 | A_95_P123612 DW003482     |
| 39364 | 464 | 9  | 215  | TCAAGTGGTTCCTTGATGCCCAAACATGTCAACTGGTAAAGATCTCACTGCATCATT  | 38298 | A_95_P089678 BP530599     |
| 39376 | 464 | 21 | 1026 | ATTTATGAGGGGCAAATTGTACATTGTTTCGTCGTTGAATCCAGATTCAATTGAAC   | 38322 | A_95_P093233 AJ299254     |
| 39379 | 464 | 24 | 1096 | CAAGTTTATTATTTCTTGGTAGATGGATTGGCCATTCTTATGGTCTTTGTTGAGTTG  | 38328 | A_95_P014131 TA16725_4097 |
| 39380 | 464 | 25 | 1233 | GAGAAATGAAAATTCACACCGTCGCCCAACTGTTTAAAGACTGAGGCGCAATTGTA   | 38330 | A_95_P018136 AF390556     |
| 39387 | 464 | 32 | 812  | GGCTTCTGTATTGTTTTAATGTAAGTACACCAAAGTGGGAATAAAGATATGCAGC    | 38344 | A_95_P011406 EB425761     |
| 39388 | 464 | 33 | 315  | GTTACTTGATTGAGAAACATCCTGTACTATTTCTAATGGTGATTGAGGAAGTTCCCTT | 38346 | A_95_P142912 EB446307     |
| 39394 | 464 | 39 | 765  | GGTCACTTAGTATTATTCTCTCTAGGCACTAGTTTCAGGTCATATTTAGTTTTATGG  | 38358 | A_95_P227334 EB451548     |
| 39397 | 464 | 42 | 787  | AATGGATAGCATTCAACACTAATGACAATGCCATGATCAACACCCTGAGTGGCCGTA  | 38364 | A_95_P125952 EB425138     |
| 39398 | 464 | 43 | 890  | GTTGCACTATTCCTGATCCTTCTACTATCGAAGCTACCTTACTTTCCACAGAAAACAG | 38366 | A_95_P009156 EB677644     |
| 39402 | 464 | 47 | 823  | TAATAACTTGCTCTCTCTCTAAATTCTCTGTAGAAAGTTCACCTACCCAAGTTGTGAC | 38373 | A_95_P151482 EB681683     |
| 39404 | 464 | 49 | 379  | CAAGCAATGGATGAATTGTGTATACAGACCTATACAGAAATATGCTATAATCGAG    | 38377 | A_95_P136997 FG638503     |
| 39408 | 464 | 53 | 697  | GCTGCTGTTATTATCGTTGAATCTTCTCCCATCTCAAGAGCTTGCTTGATATTTTC/  | 38384 | A_95_P301348 FG186234     |

|       |     |    |      |                                                               |       |                           |
|-------|-----|----|------|---------------------------------------------------------------|-------|---------------------------|
| 39409 | 464 | 54 | 1523 | GTGATTCCAAGATCTGGAGCTAATTTGCTAACCTCAAACCTCATATTGATTCTTGTAAG`  | 38386 | A_95_P196037 TA16252_4097 |
| 39413 | 464 | 58 | 604  | TGCCTCTGCTGTAGTTGAATCTATGTTTCATATATTTTGTTTAATCTGTGCGAGAACATAG | 38394 | A_95_P211257 TA19571_4097 |
| 39415 | 464 | 60 | 731  | CGGGGTTTGTCCGTCGGTTTTGAAATACTGGGTTTCAGTATTTTCTGCATTTTTAAAA/   | 38398 | A_95_P002721 EB678636     |
| 39417 | 464 | 62 | 572  | GTACCTGTTGAAGCTGTTGACTTGCCAGGATACTTGGTTTTGGGTGAATTCGGAAAAG.   | 38402 | A_95_P069750 BP137474     |
| 39419 | 464 | 64 | 838  | TTCAAAACAGCAGGTTTTGTAGAATCAGTGTTAGATGTTTACTGGGAGCTCCCTCCTGT   | 38406 | A_95_P296223 EB450843     |
| 39421 | 464 | 66 | 342  | GCGGATCCATTTACCTATGGGCGTAAGAGGATAATATGGTGATAGTAATCTTAATG      | 38410 | A_95_P134142 EB436062     |
| 39440 | 464 | 85 | 462  | CTTCTCTAATGTTTCGCAAGTTTGGCAGAGAGTGTACCTTTCAAGATATCATCCCATG/   | 38446 | A_95_P209812 EH616377     |
| 39441 | 465 | 1  | 1890 | AGATCAATAGGTGCGCTCCCAAACAGGATTAGTAGTTGAAATAGGTTTATTCTTGTG`    | 38447 | A_95_P019851 AJ002314     |
| 39443 | 465 | 3  | 500  | ACCTGATTCCTTTAAAGGATATGTAGGCAGCCTCATAGTTTGGTCTAACCAAATAAGA/   | 38451 | A_95_P308058 FG640649     |
| 39449 | 465 | 9  | 853  | AAGCTGCTTACAGGGCCATTCACGACTTCTAAGCCATTGATCAACATGATGAAAGC      | 38462 | A_95_P226224 EB442821     |
| 39452 | 465 | 12 | 619  | GGTTTTCAGAGACCAACCCGTTGTTATTACATTAAACTATAACAAGGTTCTCTGTTTTTC  | 38468 | A_95_P194587 FG637891     |
| 39455 | 465 | 15 | 638  | TCAAGAGCATGCTTGACAAAGATGAGAGAGTCATACGACATCTAGTGATGAAGCAG/     | 38474 | A_95_P145512 DV160165     |
| 39456 | 465 | 16 | 537  | GTTTGGGTCTAGACTCTTGGTCAAATTTGTTTCTAGATTTTCCGAAATCAGGAAAATAC   | 38476 | A_95_P163337 FG643534     |
| 39458 | 465 | 18 | 328  | GGGCTAGGTAGTGGTATTATCTTTGGACTTCCGCATGTTTAACTTACTGTTTTAGACC`   | 38480 | A_95_P222802 FS433138     |
| 39461 | 465 | 21 | 838  | CAAACGGTGATGATCATGTGACTCTGGCTGCTGTAATATCTTCCATTGTTTTCCAAT/    | 38486 | A_95_P269546 FG161244     |
| 39467 | 465 | 27 | 524  | CTGCATTTGCTCTTGTTATTA AAAACTATCTGGATTCTGCTTCAGTAGAGGCCTGCA/   | 38498 | A_95_P131652 EB432004     |
| 39468 | 465 | 28 | 682  | GTTTAAAAAGATCATTACGTTAATGTATGGTGTCTTGGACTTGGGGCATTATAAATC     | 38500 | A_95_P182257 TA13169_4097 |
| 39477 | 465 | 37 | 389  | GGACATTTTCTTCTTCTTGTGCGAGTGAAACTCCTTCTATGTGTTCTACTTCATCAI     | 38518 | A_95_P159547 EB682721     |
| 39478 | 465 | 38 | 594  | ATGGCGTTTCGACACCCGTTTTCTCCCTTATCTTCTGCTATTTATGATATCTTCAGACT   | 38520 | A_95_P303343 FG644449     |
| 39480 | 465 | 40 | 210  | ATAACTTTCCAGGCAGAGTTGGAAGTGGTTGCTGATTAAGAGTCTTAACTGACCGGG     | 38524 | A_95_P094803 BP532877     |
| 39486 | 465 | 46 | 408  | CTTTTTATAAACAAGGTTGAAGGGGGGTGGGGGGTTTGAGTAAAGAGTCAGGTTTA      | 38536 | A_95_P072205 BP525899     |
| 39491 | 465 | 51 | 815  | GAGAAAGGATCTGCTTAACAGGTTAATCCGTTCTCTTCCCCTATTGTTTGCATGTT/     | 38546 | A_95_P154007 EB684167     |
| 39495 | 465 | 55 | 388  | ATACGTGTAAGATGGTATTGAATTGGTTTTGTATGCATGGGGTTGCTCGTGACTT       | 38553 | A_95_P142362 EB445845     |
| 39500 | 465 | 60 | 688  | TAAAACGGGTAGCATATTCTGCTGTTGTGGTTGCTGCGTGTATCTGAGCATTGCATAI    | 38563 | A_95_P301263 FG174837     |
| 39503 | 465 | 63 | 772  | TCCACTGGTTTATGATATCAAACACCTGATGAAGTTCTGTAATAGCCTTCATGGTGCC    | 38569 | A_95_P117617 EB679871     |
| 39504 | 465 | 64 | 1779 | AAATTTCAATTGATTCTTCGTTTTCGAGGCCGATTTAATAGATGGTCGACAGTGATTTT   | 38571 | A_95_P008811 TA15510_4097 |
| 39505 | 465 | 65 | 1141 | CTGTGATAGCAGCTGTTATTCGATATGTTTATGTCATCTTAAGATGACTTCTGGCTTG    | 38573 | A_95_P026306 TA14719_4097 |
| 39506 | 465 | 66 | 731  | CTTGACAAGGTCTACGTTGTGAATGTCCTAGGATACATAGCATATAATTTTGAATAG     | 38575 | A_95_P217262 TA20894_4097 |
| 39512 | 465 | 72 | 471  | GTGGTTAAATCCGCCTTTAGGTGTGAGATACATTATGTTTACTTCTACAAGGGTGTA     | 38587 | A_95_P235479 FG644993     |
| 39514 | 465 | 74 | 189  | GCAGCGACAACATCATAATTTAACACATACACACACTTTCTACCGATTTACAAAA.      | 38591 | A_95_P097763 BP534188     |
| 39516 | 465 | 76 | 201  | ATTGTATTCTAGGTTTAGCGTGAAGGTACCTAAATATTGCGAGGCAATTTGAAATTA     | 38594 | A_95_P109747 CV019433     |
| 39518 | 465 | 78 | 774  | TATGCAAAGTTTGAGTTTGTATATCCAAAAATGATGGACGTTGCAGTACCAGCTAA      | 38598 | A_95_P272496 EB450503     |
| 39520 | 465 | 80 | 744  | GTATTGTAACATTTGCTGTGATCAAATCCAGTAGGATCAAAGCAATGGCTAGATGG      | 38602 | A_95_P263776 EB451244     |
| 39523 | 465 | 83 | 109  | CTTCTCTTCTGCTCGTGATTGCTTCTTATAAAAATTAAGTAAAAATACATAGCCTGG     | 38608 | A_95_P098783 BP534638     |



|       |     |    |      |                                                             |       |                           |
|-------|-----|----|------|-------------------------------------------------------------|-------|---------------------------|
| 39527 | 466 | 2  | 759  | ATATCTCATGAGGTACCATTATTGTGATATTCGGATCGTTGCTGCTTGTCTGGGCTGCA | 38450 | A_95_P273316 FG142451     |
| 39528 | 466 | 3  | 821  | GCAGTTTCCAGTAAAAATCTGAATGTCGACCATCATCATAGTATGGAGCTAATT      | 38452 | A_95_P242437 DV999851     |
| 39530 | 466 | 5  | 422  | CATGGGATCCTGTAAGATTATACTGACAAGATCTCCATCGTGTCTACACCAACTGCTG  | 38455 | A_95_P098698 BP534604     |
| 39532 | 466 | 7  | 0    | TTAGGCTCTTCATCTAGTGGTTTGTCTATTAAGAAATCTTGCATAACTTGTGGCTTT   | 38459 | A_95_P308298 A_95_P308298 |
| 39533 | 466 | 8  | 1689 | TGTTTGCAGTTATCTCGCTGTTTCTGGCACTCACTTGGGATAACTTTAACAGCATTAT  | 38461 | A_95_P026606 TA13264_4097 |
| 39534 | 466 | 9  | 985  | TGCGGTGCGATCTAGACTTTTTTATAACGTGTCGAGTATATGCTTGTGTTATTTATCC/ | 38463 | A_95_P189852 TA14876_4097 |
| 39541 | 466 | 16 | 602  | TCACGGGCTAGAAAGCAATGGTGTGACAACTAATTATATGGTGTAGTAACAAGAC     | 38477 | A_95_P123172 DW003067     |
| 39543 | 466 | 18 | 491  | AACTTTCTCATGGGTCTTGGCAGGAAGGCAAATCAGGTGTACATTATTGATTTTGA(   | 38481 | A_95_P122207 DW002236     |
| 39544 | 466 | 19 | 764  | TTGAAACGCCTGAACCTCATTGACATCTTTACTTTTGGGTCTGTGCTTCTGATGCAGI  | 38483 | A_95_P253939 EH622184     |
| 39546 | 466 | 21 | 436  | ATGGGATGAGGCTTAAACCGTCCTCCTTTAACTTTAATGAATAGATGCTGTGAATCAT  | 38487 | A_95_P023116 CV017227     |
| 39551 | 466 | 26 | 138  | TAAATGAAGATGTTTGTGTTGCTGTGTCATCATGATGATGGCTATCTCCGCCGTG     | 38497 | A_95_P000818 FG633313     |
| 39553 | 466 | 28 | 538  | GGGAATGCAACCTTTAAGTTGTACCAACGTAGAAAGTCTTTATGTTTGTGGTTAA/    | 38501 | A_95_P024796 EB431293     |
| 39554 | 466 | 29 | 256  | TGGTCTTAGTTTCATGAAGACCTTAATGTACCTGTGATACAATGATACCTGTAATCCT/ | 38503 | A_95_P027636 EB445660     |
| 39560 | 466 | 35 | 425  | CTAGCATTTTGAAGGTTGATGATGCACGGGAAATCATAGGTCAAGTGAAGGAGAAG    | 38515 | A_95_P164347 EH623536     |
| 39567 | 466 | 42 | 835  | AAAGCTCGAAAGCTATCAAGTGCATTATCTGCTGCTAGCTCAGCTTGTGATCATATAC  | 38529 | A_95_P130787 EB430890     |
| 39571 | 466 | 46 | 587  | CAGAGTGCCTAAGATTGTGGAATGGGCATCTTAGTTTGCAGCTACTCTTGACAAGC/   | 38537 | A_95_P161997 EH620702     |
| 39574 | 466 | 49 | 761  | TAAAGCCACTTGATCTCTTACCGACAAACGGTCTGTTGATGAATCGGATATTAATATG  | 38543 | A_95_P159967 EH618564     |
| 39577 | 466 | 52 | 775  | GACTATTGGAGACCAGCTGCTGTTTTCTTCTTGATCTTGTGACCTTTATTTGGTCT    | 38549 | A_95_P001401 EH620962     |
| 39580 | 466 | 55 | 822  | CAAGCTTTCCTTTTGCATCCCTATGTTTGTGCTTTGTGAGAAATAGAACAAGATA     | 38554 | A_95_P183872 AB049816     |
| 39582 | 466 | 57 | 490  | GATCCCCCTGTAATAGTCTTTTAAAGTAAATTCGTGTTCCACAATTTATTTGTGGTGTG | 38558 | A_95_P182972 TA13347_4097 |
| 39587 | 466 | 62 | 883  | CTATTGTAAATTGAAGTATATGCGGGTGGCATAGAGGTGAACACTGTTGATCACAT    | 38568 | A_95_P268106 DV999551     |
| 39588 | 466 | 63 | 510  | GAGAGGAAAGAGTGAGGTATTTTATTTGTTTCATGTCACAAGGGCCTTTGCCATGTTT  | 38570 | A_95_P164017 EH623119     |
| 39591 | 466 | 66 | 319  | GGGCCAGAGTTTTTGGTCTGACACATAGGCTTTTGAATTGATCGTTGAATTTACTGAA  | 38576 | A_95_P142887 EB446289     |
| 39592 | 466 | 67 | 502  | ATCTTTTCGTTGAGGACCTTATCCCGTCGTTAATTTTTCTTTTGGAGGGGATGGGGG   | 38578 | A_95_P282003 AM792648     |
| 39593 | 466 | 68 | 563  | TAGAATTTCTGTCAGATACCTGAAGGAGGACAAACCACATGGTTCAGCTGGAGGAC    | 38580 | A_95_P157567 EH615620     |
| 39597 | 466 | 72 | 457  | TGTATGTCCGATTAGCTCTTTGGTTTTGGAAGCTTTGGATTATAAATTTTGCATACTCT | 38588 | A_95_P212522 TA19854_4097 |
| 39598 | 466 | 73 | 797  | ATGTTTTACGCATAAGTCATACAGGGAGATGTAGTTTCTTGGTAGCATTTTGGGTGCI  | 38590 | A_95_P297303 FG140103     |
| 39600 | 466 | 75 | 1478 | ATCTTTGAACTCTCCATGTGTCATTTTCATGGAATGTTGATGTGGAATTGTTTCTAATA | 38593 | A_95_P178327 TA12217_4097 |
| 39605 | 466 | 80 | 841  | CTCATATTTTATATCATGGGATTTTCATGTTGGATGGATGGACCAGTGTGTATGTCAAA | 38603 | A_95_P016766 DV160218     |
| 39609 | 466 | 84 | 593  | GTTTGATTGGGATCTTACGCGTGCTTAATTTATGAATTTGAATATGGTCTCACACTTTI | 38611 | A_95_P152852 EB683190     |
| 39610 | 466 | 85 | 1193 | AACTAAGGGTCTTATTCATGGTTGATTTGCTTCTTAAGTTATCTTTGCTGGTGTATC/  | 38613 | A_95_P153747 AF352797     |
| 39612 | 467 | 2  | 522  | CATAACAACCTCAGATACAATATGGCAGGTGTGGATACTACCCAGCTGCTTGAGAGGT  | 38616 | A_95_P054631 BP133489     |
| 39617 | 467 | 7  | 657  | GCCTATCCATGCTTTAGTGTGTTAAGGGTTTTTATGTATTTTTCATCTATGGCTTTAGC | 38626 | A_95_P140022 TA17508_4097 |
| 39618 | 467 | 8  | 139  | GAGACTCTATGGGAGCTTGATCGGTTTTGTGACCAATTGGAAGAAGATGGTGAGCAA   | 38628 | A_95_P034379 AJ718638     |

|       |     |    |      |                                                              |       |                           |
|-------|-----|----|------|--------------------------------------------------------------|-------|---------------------------|
| 39619 | 467 | 9  | 1463 | AGGCGCCTTGTTGTTTGTAGTTTATCTGTGCAGTATCTTATACTTGGCTATCCGAAAA/  | 38630 | A_95_P117102 AB505625     |
| 39621 | 467 | 11 | 1391 | TCGGTGCTTCTACTGAAAGACCGAGATGTAGTTGTATTTATCTACCGATAAATGTAAT   | 38634 | A_95_P025821 TA15595_4097 |
| 39622 | 467 | 12 | 944  | GCTCTCTTATGTAGAACTACTAGTTAGTAGAAAAGGTGTGAACTGATAATGTGTAGTC/  | 38636 | A_95_P199712 TA17052_4097 |
| 39627 | 467 | 17 | 835  | TTGTAATTCTGGCTTAACTGGGAAGAAAAGTGGAAAGGCAATCATTCTTTGTTTGTAGTT | 38646 | A_95_P230679 DV157898     |
| 39628 | 467 | 18 | 528  | AGAACCATTTCCGTTGTCTACCAATAGCTGGTTTTGCTATATTTTCCATCTGCTGTGCGA | 38648 | A_95_P290518 TA13817_4097 |
| 39632 | 467 | 22 | 693  | ATGAAACCACGCTCAAAGGAATTGAGAGTTTACATTTTCGATGAGGAAGATAGGGGT/   | 38656 | A_95_P210717 TA19455_4097 |
| 39636 | 467 | 26 | 347  | ATGAACGAAGTAGATCGCCATGTACCTTATTTACTGAAGCAGACGTCATGCCAAGCT/   | 38664 | A_95_P158407 FG645271     |
| 39638 | 467 | 28 | 311  | AGAAAAGACAGTTCTGGGCATCGGCTGAAGGAAGCTTACAATTTGATGAAATGGT/     | 38668 | A_95_P131227 EB431373     |
| 39639 | 467 | 29 | 572  | TAGGTTGTTTTTCGGATTGGGGTGGTGTGGCTGGTATTGCTTCAAATACAGTGTA(     | 38670 | A_95_P151417 EB681616     |
| 39641 | 467 | 31 | 690  | TAAAACAGCCACTTTGGGTCATTTTGGAGACTTGGTCCAGTTGACCCACAGCCTAA     | 38674 | A_95_P159387 EH617554     |
| 39643 | 467 | 33 | 1065 | TCGTTTGAGATTTGCACCGTCTTTTCTTATTTTATAGATTTTTGTGAGGGCAAAGTA    | 38676 | A_95_P180647 TA12795_4097 |
| 39644 | 467 | 34 | 1348 | TTGGTGGACAGTGTTGACTTGTAAAGCCTTGCAACTTCTGCTGTAGTTGTGGATAC     | 38677 | A_95_P211582 TA19646_4097 |
| 39648 | 467 | 38 | 927  | TGATCCTATGGTCTTTGTTCTATTGAAGAGTCTGGAGAGCATATCATTGCTGGTGCT    | 38685 | A_95_P239779 EB442830     |
| 39650 | 467 | 40 | 271  | AGATGTAATTTCTAAGATTCGGGGATACGGATCCTTGTACAGATACGGGTGCGGGT/    | 38689 | A_95_P088643 BP530163     |
| 39652 | 467 | 42 | 776  | TTAAGAAAATACTGCTGATAGTGTCCACTGGAGCATGTTACGCGTATCTTCCCAT      | 38693 | A_95_P289343 DV158833     |
| 39657 | 467 | 47 | 893  | TAGTGTGTGTTCCACCATGGTAGTTTACCGACCTTTCCTAGTTTCTACTTTGTGGATT   | 38703 | A_95_P149347 EB679195     |
| 39658 | 467 | 48 | 866  | CCTTGACTATAGAGTAGATTGAGGTACGTACATTTGTTAGCACTATTTTCTGAATGTC   | 38705 | A_95_P203982 DV158120     |
| 39660 | 467 | 50 | 209  | CTCTTTTTGACATGTAGGTTTTATGTACAAAATTCGATATTTCTCCCTTGTTCGAA(    | 38709 | A_95_P130657 EB430725     |
| 39661 | 467 | 51 | 356  | CGACTGGAATGGCAGTTTTATGCACTAGCTTGAATTCAAAATGGATTGAGATATAAA/   | 38711 | A_95_P232609 BP530829     |
| 39664 | 467 | 54 | 376  | GTTGATGCTGCACGTAACGTGTGCAAGTTATTGGAAGAGAAAGGTATAAAAGTTTAC    | 38717 | A_95_P205822 TA18372_4097 |
| 39666 | 467 | 56 | 136  | GCTTGATTGAGTCAGCATAATAGAGCTTAATAAATAAACAGCTGCCAAGTTGCAATG    | 38721 | A_95_P159757 EH618204     |
| 39671 | 467 | 61 | 727  | AGCAGATGTACAGATGATAACGTGTTGTTTAGCAAATGAAATCAGAATTAGGGTGA/    | 38731 | A_95_P135662 EB439191     |
| 39674 | 467 | 64 | 814  | TTGAGAGTTAACTATTGTGTATGCCGAGCGACACTTTTAAACATTGTTTATCGTTCT(   | 38737 | A_95_P136007 EB439571     |
| 39677 | 467 | 67 | 969  | CGAGAGATGATATTGACATGTGGTGCAACTTTCCTTATGAAGAGAGCTGATTTAGAT    | 38743 | A_95_P207147 TA18677_4097 |
| 39678 | 467 | 68 | 2086 | TTATGGCGGCACAAACATGGTTGATGATTGATATACATGGTTGCAGTTGGTGTAAA     | 38745 | A_95_P237879 AF096299     |
| 39679 | 467 | 69 | 1188 | TGGCACTGTTGATTTTCATCTTTGGTAATGCAGCAGTCGTGTTCCAAAAGTCAAAAATC  | 38747 | A_95_P019251 TA14653_4097 |
| 39680 | 467 | 70 | 443  | GAAAATGTGTACTGCCGATCCTATAGAAAATAAATGCTTTCCCAAGATACGAAAAAGC   | 38749 | A_95_P130707 EB430778     |
| 39686 | 467 | 76 | 733  | GGGTTTCTTTTTGGGATGGTTCTGCAAATCAGTGTACCAAATATTCTGGACATATAT.   | 38761 | A_95_P122812 DW002768     |
| 39687 | 467 | 77 | 1037 | ATTTGGCTATCATGCACCGGAATACGCTATGACTGGACAAGTACACAGAAGAGTGA/    | 38763 | A_95_P019091 TA15002_4097 |
| 39689 | 467 | 79 | 1755 | GTCCTTATGGAGCTTTCGTTTCAACCTTGTGCAAGCATATTGGATCAAATAATGTTTT/  | 38766 | A_95_P010316 AJ344535     |
| 39691 | 467 | 81 | 351  | TCCATGTAACCTCCTCAACCAATGATGTAATTTGACACGATAATGAATGAAGATTA     | 38770 | A_95_P306588 FG635682     |
| 39694 | 467 | 84 | 189  | CCTGATCTTATTGCTTGATATAAGCATTATTATTAGGGGAAAGTGGCTGAACAACCTC   | 38776 | A_95_P097198 BP533925     |
| 39701 | 468 | 6  | 786  | ATATTGAATAAAAAGAGAGTGACAAAAGAGGAGGGCCGTGGGTGAGATTTTTTCT      | 38625 | A_95_P187597 TA14382_4097 |
| 39702 | 468 | 7  | 870  | CAGTGACTGGGAAAAATCTGGAATTGCAAGAAGGGAAATTGATTGTGCAGAATTGG     | 38627 | A_95_P236289 EB678675     |

|       |     |    |      |                                                              |       |                           |
|-------|-----|----|------|--------------------------------------------------------------|-------|---------------------------|
| 39704 | 468 | 9  | 413  | AGAAGGGCCTAAAATTCTGTCCAGTTCTGCACAGGAAGTGCAGGCTGAAGAGTTTG`    | 38631 | A_95_P075235 BP526673     |
| 39706 | 468 | 11 | 709  | GGTGGCCAAATTTTATAGCAACAGATCGAAACTTGGGTTCAATGATTATTGTCTCTCT   | 38635 | A_95_P124322 FG137969     |
| 39709 | 468 | 14 | 338  | AGAGTGCCGGCTTAAATAATTTTAGTGCTGTTGTAGCGAATTAACCTGATTCTACTGT   | 38641 | A_95_P140302 EB444262     |
| 39713 | 468 | 18 | 166  | AAGCTCGAATGGTACTACCAATTCTCCTGATGATGAAAATGGGCATGAACTGGTGGC    | 38649 | A_95_P154537 EG649632     |
| 39715 | 468 | 20 | 803  | ATTGTGGAAAGCTTTCTGGCATGCCTAGTGTCTTCAACAATGGTGGCAGAACATTTG/   | 38653 | A_95_P224042 TC50531      |
| 39716 | 468 | 21 | 855  | ATTGAACCTGAACAGTGAGACACATATCTTGTTC AAGTTCTGGTGTACAATCTTTCAA  | 38655 | A_95_P230469 DV158286     |
| 39720 | 468 | 25 | 899  | CACCTGTCTTATCTTATGACAATCTGAAGACGGGTGCTGCTGCTGTTCTGTAATTCTG`  | 38663 | A_95_P186932 TA14233_4097 |
| 39722 | 468 | 27 | 850  | CGTTTATACCTGCTTTGCGTTGGATATATAGATGTCTGGATTCAA AATTCTGCAAAGT, | 38667 | A_95_P211652 EB435434     |
| 39724 | 468 | 29 | 724  | GGGTGAGCTTGATGACACTGCTGCTTTCAGAACTCAA AATTGGGGAAATATTGAAT    | 38671 | A_95_P160997 EH619706     |
| 39725 | 468 | 30 | 727  | GAGGATTGTAACCTCATGGTTTCTCAATGTTCTATTTTCTTCCCTTCCCTGTTTCAACT  | 38673 | A_95_P204957 EH619176     |
| 39729 | 468 | 34 | 984  | TCTGAGGACTAAATCAGGCAACCTATTTATCCTGTTCACTGGACCTTGGACTAGAC     | 38678 | A_95_P252024 AB195470     |
| 39730 | 468 | 35 | 256  | TAGAGTTTGACACCTATGGAACAAAGCTGTGGATCAGGCATTAGGACCTGTCATCA     | 38680 | A_95_P111847 FS407121     |
| 39736 | 468 | 41 | 465  | AGTCAGGTGTTAAGACGAAGAACAGGCAGGCTTCAGACTTCATGCTAAGAAATGCT/    | 38692 | A_95_P109502 TA13168_4097 |
| 39738 | 468 | 43 | 1117 | CACTCCTGACTAGTAGTTTTCTTGAGATTGAATGTTTGATGAATTAATCGTTGTCTTTC  | 38696 | A_95_P198677 TA16830_4097 |
| 39741 | 468 | 46 | 828  | CTGAGTGAAAAAGGCATGGTTTATGTTAAGGGCTTACTTGAAAGATGATATTACTTG    | 38702 | A_95_P010786 EB425106     |
| 39742 | 468 | 47 | 855  | CTGAACATCTGTTGCGTCTTTTTGTAAAGTTGCCTGAGTACTTGCATATGAAAAAT     | 38704 | A_95_P220862 DV159376     |
| 39743 | 468 | 48 | 336  | CAATACCAATCACTTCTTTCCGGTTGATAAGGGTTTTGTTGCCCAAGTGGCTGATGTT   | 38706 | A_95_P214442 DV162682     |
| 39746 | 468 | 51 | 725  | CTTGGGATCATCTTTCTTCCACAAGAAGGAGAGAGACCCAAATCTGCAGGAAGTGA     | 38712 | A_95_P137567 EB441291     |
| 39747 | 468 | 52 | 193  | CCTTTGATTTTCTCATGCTTATGTGGGAACCTGGTTCATTAATTGACTGATTCCAATCA  | 38714 | A_95_P271476 EB443565     |
| 39748 | 468 | 53 | 343  | CGATTCCAATCCATTGCCGATTCTTTACTTGTATGTTCAAAGTTGAAATTATTGAA/    | 38716 | A_95_P093123 BP532151     |
| 39750 | 468 | 55 | 779  | ATCTGGTGACATGTATTTTGTACAAACAGTATGCACACTGAAAATATGTCCTACTGAA   | 38720 | A_95_P027006 EB448130     |
| 39752 | 468 | 57 | 689  | TTAAATTCAGTAGGAGTTTCCAAGCATAGAGCTACCCCTGGTGCCATAGCCATTA ACT  | 38724 | A_95_P290768 DW001157     |
| 39753 | 468 | 58 | 643  | GATTAGGCTGTATCTATATATTCTGGATGTAAACGTGTATATTCATCCAGCCCTACTA   | 38726 | A_95_P265166 FG642019     |
| 39756 | 468 | 61 | 756  | TTTGATACTTTTACGCGATCCTGATGAGGAGAATGTAGTGGATGCGTTAGCTATTGG,   | 38732 | A_95_P160637 EH619303     |
| 39757 | 468 | 62 | 822  | GCAACACATAGCATGCCCGATGCTTTCTGTTGATTCTTGAGTGTATTTGTATTATAAT/  | 38734 | A_95_P027051 TA16619_4097 |
| 39758 | 468 | 63 | 666  | ATTGTGATAGAGAGACGGTTTTCCCTTTTGTCTGATCAA AATGATGGTGGATATTA    | 38736 | A_95_P013891 TA14396_4097 |
| 39763 | 468 | 68 | 437  | ATTGAGTTGAGGAGTGTTAATCCAGCTGATAGGTCGATCTGTGCTTTTGCTGTTGCTC   | 38746 | A_95_P076565 FG142037     |
| 39767 | 468 | 72 | 859  | TTTATGGTGGCTGTTGGTGTCTCAAGGACTTGCTTACTTACATCATGATTGCAAGC     | 38754 | A_95_P118092 DV161102     |
| 39768 | 468 | 73 | 658  | ATTAGATTTGAGCATTGCTTCTAATTTTCAGCTGTTGTGAGAGCACCGCTTGCTAAAAG  | 38756 | A_95_P130457 EB430499     |
| 39771 | 468 | 76 | 597  | CATGAACATGAGGCCAAATTTGTGTTTGCAGATTTGATTGATGTACTATGGAGGTTA`   | 38762 | A_95_P002911 TA14681_4097 |
| 39776 | 468 | 81 | 813  | GCATCTGTTTGGTTGACTTGCATTTTACC GGCTTCTAGAATAGCGAAAGAAAATCA/   | 38771 | A_95_P117122 DV159907     |
| 39777 | 468 | 82 | 649  | GTAATTAGTGTTC AACTGATGGTACACCCCGACTGCAACTATAAGATCTACGGCTC    | 38773 | A_95_P041636 BP130144     |
| 39778 | 468 | 83 | 712  | TCAGGAACAAGTGAATTGATACCTTAGTACTTTCTGGCAGGATTAGAATTACACTTTC   | 38775 | A_95_P133802 EB435494     |
| 39781 | 469 | 1  | 661  | GAAGTCTTGAGAAGCAACAACACTGTCCACTTTGAACCAATAACACCAGACCAGATC,   | 38780 | A_95_P131822 EB432235     |

|       |     |    |      |                                                               |       |                           |
|-------|-----|----|------|---------------------------------------------------------------|-------|---------------------------|
| 39782 | 469 | 2  | 709  | GCTATTCTATATGCAGTTGTCTCTGTTGTGTCATTTTAGGTTTCCGTGAACTAAATCGC   | 38782 | A_95_P117522 DV160446     |
| 39783 | 469 | 3  | 229  | GTTGTAGATCGATGTTATTAACCTCTGGGGCTCAAATAAAACTGAAAGAAACATTCC     | 38784 | A_95_P099758 BP535053     |
| 39784 | 469 | 4  | 774  | GAAAGACAACGTTACCTGTACGAATTTGGAAGTTGGTTAAAGTTTTGATACCTTGTT     | 38786 | A_95_P136402 TA11945_4097 |
| 39786 | 469 | 6  | 430  | TGCCAGCATATGATCTTACAATATATTCAAGGGGCTGCCAAAATTTGGCCTTTTATG     | 38790 | A_95_P080505 BP528020     |
| 39789 | 469 | 9  | 599  | ATAAAGCAAACCCCTTAGCTACAGTGCTCAGTGCTGCTATGCTTTTGCAATATGGCCT    | 38796 | A_95_P201552 TA17449_4097 |
| 39790 | 469 | 10 | 741  | GCTATCTCTGTGGGCGATGACCTGTTTGTATTTGTATTTGAGCTGTTTATAAGATA/     | 38798 | A_95_P013091 TA13965_4097 |
| 39791 | 469 | 11 | 807  | TGATGTATGTATGATTGCACCTTCCAAATTAAGTGCCTTGGCAAAAGGTGGAGCGGA     | 38800 | A_95_P198617 TA16817_4097 |
| 39794 | 469 | 14 | 793  | TAGTGTAGATAGGATCTAGATCTCTACTTGGGCTGCATAAGTTTCTACATTAACCGTT.   | 38806 | A_95_P176928 EB448154     |
| 39795 | 469 | 15 | 1366 | TTTAAGGCCCATGAGTTAAAGGGTGTCTCTGCAGAGACTCTATTGAAGTTGGTTCCA     | 38808 | A_95_P200197 TA17158_4097 |
| 39816 | 469 | 36 | 2248 | TGTGAAAGGCCCCAGTTACTGGTTTCTGTAGGTCTGAACTATTAGCATTGTGGCATCA    | 38849 | A_95_P024731 TA14441_4097 |
| 39819 | 469 | 39 | 459  | TTGTCAAAGCTCAGTGACCTTCAGTTCTTTGTAGGTGAGAGCATGGCTGATGATAC      | 38855 | A_95_P104027 CV016812     |
| 39828 | 469 | 48 | 955  | CTGGATTTTTTCTTCTTTATGAATATCATTGTCCGCTAGACGGTCTTTCTAGTTGGCT    | 38873 | A_95_P020911 TA13732_4097 |
| 39833 | 469 | 53 | 206  | CCACTGACTTGTTCCTTTTTCGAAACATTGTTATCCAGGTTTCAATTTGCATTCTGG/    | 38882 | A_95_P093038 BP532117     |
| 39837 | 469 | 57 | 904  | ATCCCCTCAAGTATCATTGCTCAATTATGAAATGTAACAGTTGATAACGTTAGAAGT     | 38890 | A_95_P198927 TA16884_4097 |
| 39839 | 469 | 59 | 0    | GAATGACAAGGGTGATACCTTAGTGCTTTCCTACTACCACACTGTTAGCCGGTGACA/    | 38894 | A_95_P259486 A_95_P259486 |
| 39840 | 469 | 60 | 816  | GGTCTCGAGTCAGTTTGGTCGATTACATAAATTATCAGTTATCACTATTCATTTTGCTT   | 38896 | A_95_P238034 AF072519     |
| 39845 | 469 | 65 | 57   | GATTTTCAGAGAGTATCCAAAGCCATAAATTCTTCTCTTCTTCTTCTTCCAATAG/      | 38906 | A_95_P001611 EH618769     |
| 39846 | 469 | 66 | 565  | CAGCAGCTGGCTGACTATTAGTATCTTAGATATGCTCTACTTGACTGTAATTTAATC     | 38908 | A_95_P269201 FG639102     |
| 39847 | 469 | 67 | 411  | GTAATATCTGTTGTATTGCCAGTGAGAGTGTCTCACCAACTATATTGTCCAGTTCAA     | 38910 | A_95_P196637 EH620951     |
| 39857 | 469 | 77 | 560  | TATTGAGACGAACACTTTCGGATGACCGACGTCAGATTTTTCCCTTGCTGAATGAAT     | 38930 | A_95_P122237 DW002265     |
| 39860 | 469 | 80 | 730  | TTCCTTCTGCTGGTTTCTCCAGACTGCTATTGTATTGTAAATTAATTTATCTCTCGATT   | 38936 | A_95_P190827 TA15098_4097 |
| 39865 | 469 | 85 | 790  | TCTGATTATCCATTGAGTGCTGCATACTGCATATCCATGATCACAAATGCTGTGGAGC    | 38946 | A_95_P126077 AF154642     |
| 39866 | 470 | 1  | 795  | CTATTCGAAGGTTTCGATGTATACTTTCGTATTCTGTGGACTCCTGCTCTGAGCCCTA/   | 38781 | A_95_P013446 DV161541     |
| 39867 | 470 | 2  | 855  | GACACTGGATCACGTTGATTCTGTGCCATCAAAGTGTACTTTAATAGTCTACTTTATA    | 38783 | A_95_P017726 TA12593_4097 |
| 39869 | 470 | 4  | 676  | GCTTCCTCCTCATCTGAGTTACAACGCAAACTGAAAGTCGAAAATTCAGTGTTTCAT     | 38787 | A_95_P018451 TA16251_4097 |
| 39870 | 470 | 5  | 563  | CCCCATTGCTAATGTATTTTCAATTTTGTACCTTTTTTGTAAACCAGGGAACGAATTGAGG | 38789 | A_95_P306478 FG635368     |
| 39872 | 470 | 7  | 109  | GTTCAATTTTCGTTTGTGTTATCAAATCAGAAGGTTCTTGGCATTACTTTGGGACGTT    | 38793 | A_95_P154737 EG649739     |
| 39873 | 470 | 8  | 739  | GAATGTGAACTTTGAGGTCTCCATAAAGATGATCTTGTCTCTCTGGGGTTTTGGAA      | 38795 | A_95_P137432 EB441171     |
| 39876 | 470 | 11 | 823  | ATACTGCAGCGTTTGCACCATTATTCTAGTTGTGTTATGGCATGTTTTTGGAACTTTG/   | 38801 | A_95_P009581 TA13726_4097 |
| 39883 | 470 | 18 | 169  | CTCTGACTCGCCATGATGGCAGCCACTTGTCTTACCATATATTATTTTACTAGTTTCTG   | 38814 | A_95_P109417 CV019297     |
| 39899 | 470 | 34 | 255  | TGTCTTGTAGTTGGCTGAGACCCGATTCTAGTCTTTAGTAGCTCTTTAAGGTATT       | 38846 | A_95_P210732 TA19458_4097 |
| 39901 | 470 | 36 | 702  | ATTTTGTCTTCTGTTCTGAGGGATGTTTTCTGCAGACTTGCAAAAGATAATGCTTCTT    | 38850 | A_95_P000941 TA13754_4097 |
| 39908 | 470 | 43 | 230  | CAAATCGGAGAATGCCGACAGGTATTTCTTGGATCTCATTAACCTTGTGAAGTGCAAA    | 38864 | A_95_P100708 BP535491     |
| 39921 | 470 | 56 | 804  | GTTGCTAACGGGACTCCATGTATAATAGGAAAAATGGTTACATCTTCAATCCTTATTC    | 38889 | A_95_P021766 DV162599     |

|       |     |    |      |                                                               |       |                           |
|-------|-----|----|------|---------------------------------------------------------------|-------|---------------------------|
| 39925 | 470 | 60 | 379  | GCCAATATACTTTGGTCTTTTCTGTTGGATGGAAATGAGAAAATCTTTCTCGTGTTA1    | 38897 | A_95_P025266 FS429988     |
| 39929 | 470 | 64 | 388  | AAATTCACATCACCATATAGACGGACAAATTCACATCACCATATAGACGGATCAATCC    | 38905 | A_95_P063460 BP135786     |
| 39930 | 470 | 65 | 805  | GAGCAGTGTCAATGCTTGGACATGTAACCAGTTTTCTGCTTATCTTTCGTATTTATTTT   | 38907 | A_95_P235224 EB449888     |
| 39932 | 470 | 67 | 852  | AAACATATCAGCATATAGATGCTCGTCCAAGCTAGGTTTGATGTGTTGCACCGAGCTC    | 38911 | A_95_P246627 FG167264     |
| 39933 | 470 | 68 | 813  | AAACTCCTCCGAAAAGAAATGTTTCAGCCACCTCCATTATCTGACAAAAGACCAGGAGGA  | 38913 | A_95_P013266 EB437021     |
| 39936 | 470 | 71 | 587  | AGGCTTTTCTGTGATGACTGTATAATACTACGACTGTACCATAGGTGTGAGGCTTTAT    | 38919 | A_95_P141717 EB445374     |
| 39937 | 470 | 72 | 968  | TTACTACCTATCCTTGTGAAGCAGAATAACGCCATTATGGTTTTATGCTCTTAGCTGAC   | 38921 | A_95_P191072 TA15151_4097 |
| 39939 | 470 | 74 | 811  | AATCACTAAGCGAGCAGGAGGACCTAATTGTTGGATGCGTACTGCTACTCTTCCAA      | 38925 | A_95_P197962 TA16676_4097 |
| 39942 | 470 | 77 | 647  | GAGTGATCAGATTTGTGTTACTTTGACCAACATTTGTGGTTCCAGCAGATTTAAAGA     | 38931 | A_95_P123372 DW003223     |
| 39943 | 470 | 78 | 445  | TTGCTGTGAAATTAGTTGAGCTTGTATTACATAGGCATTAGCTGTGTTCTGGATGGAC    | 38933 | A_95_P006146 BP533450     |
| 39950 | 470 | 85 | 643  | GGATGTGAAAGATACTACAATCAGTACTCTTGCAACTGAGGTAAGGAACTGCAC        | 38947 | A_95_P158757 EH616613     |
| 39951 | 471 | 1  | 658  | CCTCCGTCTCGACGTTTTGAGATCCGTTTAAATTTAGTTGAGTGTTATATTTGATTTTGA  | 38948 | A_95_P248227 EB444101     |
| 39966 | 471 | 16 | 611  | ACCAACTCTTCCAATTGGCATGCCATTGTTGACTAAACATAAACCAACTGGGTTTT      | 38978 | A_95_P101023 BQ843094     |
| 39970 | 471 | 20 | 843  | TATTAGTAGAATGCAGTACACTCCAGGAAAATTTATTTAGAATCTTGGGACTTGGGG     | 38985 | A_95_P184442 TA13697_4097 |
| 39974 | 471 | 24 | 220  | CTCTGCTTGTCTCAATCTTCTCTCTGTTGAGGCAATGATTTGTTCTGTTAATTTGGT     | 38993 | A_95_P158497 EH616430     |
| 39983 | 471 | 33 | 2080 | GGCTTTTTATGGCGGCACAAACATGGTTGATGATTGATATACATGGTTGCAGTTGGT     | 39010 | A_95_P023976 AF096299     |
| 39992 | 471 | 42 | 736  | TTCAACATTTGACAGGCTGAGGACTTCTGAATATTGGGTAGTCCATACGTTGGTTGT     | 39028 | A_95_P253579 DV160140     |
| 39995 | 471 | 45 | 1438 | GGAGCTACTGCAAAATTTGGCGCAAGCAACAATTTGTATTTGAAAAAGTTATGGAGT     | 39034 | A_95_P245137 TA13335_4097 |
| 39996 | 471 | 46 | 681  | GCATATTCAGGTGCACAATAACCATATGTTCCCATGACCCTGGTGGAGACATGACTC     | 39036 | A_95_P284813 FG194107     |
| 40003 | 471 | 53 | 847  | CATCTGTTTTAGCACCTGTAECTCTGGAATACTTATAGGCAAAGAAAGAACTACTTAA    | 39050 | A_95_P117087 DV159878     |
| 40004 | 471 | 54 | 495  | GCACAATTGGATTTAGTATTGGCAACATTTTGTCTGGATTCGTTTGGAGGATTAACAA    | 39052 | A_95_P261266 BP131465     |
| 40006 | 471 | 56 | 586  | GGAGCTAGTATTAAGTGTGAGCTATTTATTCTACGCTTGGATCAGATGTTAGAGGCC     | 39056 | A_95_P084425 BP529013     |
| 40013 | 471 | 63 | 86   | ACTGGAATACTCCACTCTGGTGTGGTTTTGGTTTTGAGAAAAAGAATTTCCATGGTCTTTC | 39070 | A_95_P026561 EB443859     |
| 40022 | 471 | 72 | 378  | ATGCTTTACATTCCCTGATGAATCAAGTCTTGGATATTTGTACCTCGAGTATTATCTCT   | 39087 | A_95_P112787 EB447241     |
| 40023 | 471 | 73 | 336  | TTGAATGCACTAGATGGGTGAATGATGCTGTGGATACCAAGGAAGTAGAGGAAGTA      | 39089 | A_95_P127667 TA16745_4097 |
| 40029 | 471 | 79 | 832  | TCCTTCCAATGTGAAGAGCAATTGGATATATGTGTATCATTGATCAATGGTTACATTG    | 39101 | A_95_P225442 DV999954     |
| 40032 | 471 | 82 | 211  | GACTGTTGCGATAAATACATAGCAAAGTTTTGTACCCCAAGGTGGGCTATGGAAGC      | 39106 | A_95_P050106 BP132317     |
| 40033 | 471 | 83 | 1469 | GTTGCAATATTGCACTTAAAAATCCTATTCCAAGGGGCACACACAACATTGATTGAAT    | 39108 | A_95_P185837 TA14001_4097 |
| 40039 | 472 | 4  | 82   | TTTTTGCAGCAGCCCTGGGTTCTGGCACACAGTTGTTTACCTTGACAATTTTCATATTC   | 38955 | A_95_P199087 EB438068     |
| 40041 | 472 | 6  | 939  | GCTTGATTTTATCTGAAGTTGGGCTTCTGTCTCTAGTAAGGTTCTTTGGTCCATGCTT    | 38959 | A_95_P181547 TA13006_4097 |
| 40042 | 472 | 7  | 400  | GTAGTGCATGAAAAAGGCCAGCCACTGTGCATTCTCTTATGTTTCTATTGAAACAGAT    | 38961 | A_95_P160507 TA14660_4097 |
| 40044 | 472 | 9  | 892  | CCATAGATAAACTTGTGTTAAGCTGCATACTGATATATTAGGGTCGAGGGAAGCGC      | 38965 | A_95_P272081 EB680173     |
| 40050 | 472 | 15 | 1468 | GCTTCTCTAGCTGTGGTATCTTTGGCTGTTGCTTTAACAACTGTTTTCTCTTAACT      | 38977 | A_95_P197672 EU375459     |
| 40051 | 472 | 16 | 623  | GCTTCTGAAGGTGAACCTAACGTCTCATAATGGTCACTTTATTACTATTACTTAAACCT   | 38979 | A_95_P029371 BP530123     |

|       |     |    |      |                                                              |       |                           |
|-------|-----|----|------|--------------------------------------------------------------|-------|---------------------------|
| 40053 | 472 | 18 | 559  | GAGGTTTGCTCTATTGCAAGATTATCTTCATTGTCTTTGAGGAAAAGCATACGATTTG   | 38982 | A_95_P219322 TA21371_4097 |
| 40055 | 472 | 20 | 512  | TTGTTGCTTTTTCTGTTTCAATCTGGTGACAATGTTGCTGTGCCTGGTTCTATAATAA   | 38986 | A_95_P184257 TA13651_4097 |
| 40059 | 472 | 24 | 691  | TCAAAGATTCTGAAACTCAACAACCTTCATCATTGTTCAAACATATTGACAGGGTCCGT  | 38994 | A_95_P287403 FG636812     |
| 40062 | 472 | 27 | 328  | AGGCAGCTCCCCTGGCTTCTAATTAGCACTGGAATTCATCGACTCAACTATGTTTATT   | 38999 | A_95_P070020 BP192499     |
| 40067 | 472 | 32 | 495  | TTTGATGTCACGTATTCTGACCCTTTGTATATGGCGTGTGTTGAGGTTCTTTCTACTAAA | 39009 | A_95_P172031 EH665275     |
| 40068 | 472 | 33 | 407  | GAGCGACAAGAATGCTAATATTGGCTGGCATGAGCTAGATATTCTCTGATTGATG      | 39011 | A_95_P064345 BP136023     |
| 40069 | 472 | 34 | 458  | TTTCTAGTGCTCCAACCCCGTCTGGGATCTATTTTTACAATTGCCTAACCAATCTCCAA  | 39013 | A_95_P039281 BP129507     |
| 40072 | 472 | 37 | 608  | TTTTGTCCATTTGAAGATGTTCTGTGTAAAGTTGCAGATAGTTATTTATTCGGGTG     | 39019 | A_95_P064925 BP136190     |
| 40079 | 472 | 44 | 662  | AGTTGGCCGTTGAATCTACACTCATTGTTTCTTCTGATTCTGTTAAAAGTTATTCGTA   | 39033 | A_95_P211912 TA19718_4097 |
| 40087 | 472 | 52 | 949  | GTTGTTTGCCTGTGAAACAAAATGTAAAGTTCCGAGATCTACTGATGACCATTCTAAA   | 39049 | A_95_P018281 TA17065_4097 |
| 40088 | 472 | 53 | 343  | ATCTCGTTGATTTGCTGGTGGATTGGTGATTAAGTGGTGACTGGAGTATTCGTG       | 39051 | A_95_P103597 CV016595     |
| 40094 | 472 | 59 | 903  | TTGACAGGTCATACAAGTGTGTTATGTCTGTTCTATGCTGGGATCAGTTTCTTTTATC   | 39063 | A_95_P228869 EB678232     |
| 40099 | 472 | 64 | 691  | GAGTTTGAGAAATAAAAATCAGCCCAACAACCTTCTACTTTACGGATACTTCGCATAC   | 39073 | A_95_P301798 FG192435     |
| 40104 | 472 | 69 | 730  | TTTTTAAAGATGTTTCAAGCGGTGGTAGTGGTGGTGGAGTACTAAAGAAGAGGGAC     | 39082 | A_95_P210727 U64926       |
| 40110 | 472 | 75 | 358  | GGTTCGGGCCATAATTTTCAAAAATCCAAAAGTATTTTCTTTACTTCTCTCTAGA      | 39094 | A_95_P004731 EH624481     |
| 40113 | 472 | 78 | 124  | TTTCATCATGATTTGGGACCTTGAGTCAAACCTGAAAGTTGACTCATTGATTTGCATT   | 39100 | A_95_P210647 TA19440_4097 |
| 40116 | 472 | 81 | 857  | GTTATCAAACATTTGTTGCTGAAGTGAAGACATGAATCTAATTTGATGCTGCTTTCT    | 39105 | A_95_P131167 EB431296     |
| 40117 | 472 | 82 | 691  | CAGGGAGACTGTTCTTGTACAGTTTTGGTCTGTCTCTTCTGTTTTCATTATACAT      | 39107 | A_95_P148712 EB678176     |
| 40119 | 472 | 84 | 1357 | CCTTTAGGGTGTCTTTAGCACGGAGTTCAGTTGTCTTGTACTGTAAGTATTTTTATTT   | 39111 | A_95_P203472 TA17860_4097 |
| 40124 | 473 | 4  | 837  | CTTTTCTTATATGCTTAGAAAAGGGGATAAAGAGGTTTCTTCTATCCTTGATCCAT     | 39120 | A_95_P217242 DW004715     |
| 40127 | 473 | 7  | 192  | GGTGCAGGAAGAAGTATTGTTGTATGAAGTATCAAAGTATGTTAGACTTGGTGAAT     | 39126 | A_95_P128012 EB427574     |
| 40130 | 473 | 10 | 879  | GAATTACTTTTCCGACACGAGAGAATCCAGAAAAGTATTTATATGTAGGACCAAGGGA   | 39132 | A_95_P232789 DV159931     |
| 40135 | 473 | 15 | 1257 | ATACCTGTGAGAAACACACATGTCTATGCATTTGCAGAACATGGAAATGATCTTGGG    | 39142 | A_95_P188272 TA14533_4097 |
| 40137 | 473 | 17 | 496  | CTCAAAGTAGGGTTATCATATTTCTTTCGTGACTTTAGCTATGAAACATGTAAGTG     | 39146 | A_95_P035083 BP128353     |
| 40148 | 473 | 28 | 711  | CCCTCACGCCTTTGATGGTGAAGTCTTTTGAAGTGGCGCATTTTTCTTTCTTAGTTC    | 39168 | A_95_P204357 TA18048_4097 |
| 40150 | 473 | 30 | 1603 | GGTTGGCCAAGAAAGTATGTTATTTGTATTCTTGATTATAGAAAGATACTCTGTCCA    | 39172 | A_95_P007501 TA17352_4097 |
| 40151 | 473 | 31 | 499  | TGTTGCCTTCAGTTGCTAGTTGCAAATTTTATTGTTGTAATTGATCTGCTGCAAATTTT  | 39174 | A_95_P131477 EB431768     |
| 40153 | 473 | 33 | 927  | CCAAGCGTCAAACGAGCATGCGTTCATTGGATTCTCGCTTAAGCATTGGCTAATTTT    | 39178 | A_95_P209282 TA19155_4097 |
| 40156 | 473 | 36 | 440  | TCATACCTTGTGTCAATGCTGATGGAAGTGAACCCGGAACCTGTAAAGACAGGGAA     | 39184 | A_95_P138107 FG136993     |
| 40158 | 473 | 38 | 641  | TCTGCTACGTACTGTTATCTATTTTCAAGGGACCTTGTAAACAATGGATTTTAAAGTGG  | 39188 | A_95_P162617 TA15941_4097 |
| 40159 | 473 | 39 | 565  | CTGGATCTATTTCTGGATACTTGAAGTGAACAATGTGAAAGTGGTATCTTATTG       | 39190 | A_95_P004716 DQ648018     |
| 40168 | 473 | 48 | 214  | CTACGCCACAACTTTGTCCCGGAAAATGAATATCATAAAACAATCTTAAAATTTGA     | 39208 | A_95_P005136 TA11655_4097 |
| 40170 | 473 | 50 | 1802 | GCTTGTGATCTGTACCAGCACGAAGAAATCTAACACATACGTTCTTTTCATGAAGAG    | 39212 | A_95_P188852 TA14661_4097 |
| 40171 | 473 | 51 | 782  | CAGAAAGCCAGAGCTAACTTTTCTAGTCTATACACAATATCAAAGGAGTTTCTTTT     | 39214 | A_95_P293903 EB438474     |

|       |     |    |      |                                                             |                                                    |            |       |              |              |
|-------|-----|----|------|-------------------------------------------------------------|----------------------------------------------------|------------|-------|--------------|--------------|
| 40172 | 473 | 52 | 542  | AGACGCAATTGTC                                               | ACTAGATACTATTCTTCTTTCTCTCTACATGGTGT                | TTGAATCAAT | 39216 | A_95_P307823 | FG639648     |
| 40174 | 473 | 54 | 93   | TTTCATTA                                                    | AACTGGATTGAGATTTTTACCGTTTACGGACCATGGGGTAGGCCAGACAT |            | 39220 | A_95_P088228 | BP529991     |
| 40175 | 473 | 55 | 830  | CATCAGAAATGGGCAAAGTCTCAAATATGTGCTGATGCTGAACTTGGTGTGATATTG   |                                                    |            | 39222 | A_95_P310098 | FG135000     |
| 40178 | 473 | 58 | 887  | CAGGCATTGCCCTCAGACTCTTTCGGAAGTCTCCTGTTTTACTTTTCTATTTATTTTGT |                                                    |            | 39228 | A_95_P230239 | DV162407     |
| 40179 | 473 | 59 | 393  | TAAAAGGAAATCGGACTTGGAGTCTGATAGTGCCAGTGACACTGATAGTGGATATG/   |                                                    |            | 39230 | A_95_P155112 | FG139357     |
| 40180 | 473 | 60 | 916  | GCAAAGCTTATTCATGAGAGAGGTGGCAAGGTAATTGCAGTGAGTGATATAACTGG.   |                                                    |            | 39232 | A_95_P194207 | TA15843_4097 |
| 40184 | 473 | 64 | 390  | ATGGTCCAATTCTGATCGGTAATAAATACCGGGACTTTGCAATATTTGATTGATCACA  |                                                    |            | 39240 | A_95_P278918 | AM842139     |
| 40188 | 473 | 68 | 192  | CCCAGCTTTGGTTGTAGCTTTAGTCACTTATAGTTGTTTTATAATATTCTTTGAGGC   |                                                    |            | 39248 | A_95_P097228 | BP533941     |
| 40189 | 473 | 69 | 522  | GTGGTGAGATGATTTTGATAGTTTGTCTTACTAATAATTAAGTTGGCTGGTACTC     |                                                    |            | 39250 | A_95_P019606 | TA15061_4097 |
| 40192 | 473 | 72 | 637  | TTACAATACCAGTTGAGGACTTCATTGAACCTGTTGGCTCTAAATGGAAGTGCAGAA   |                                                    |            | 39256 | A_95_P186532 | TA14147_4097 |
| 40200 | 473 | 80 | 511  | AGTCAAAACCATCTTTTGCATGGAATCTTTTCTGGCCATGCCTTGGGGAGTCCTTC    |                                                    |            | 39272 | A_95_P031706 | BP535041     |
| 40207 | 474 | 2  | 573  | TCTCTCCTCTTCTCTAATTTGGTCTTTCATTTAGGCTAGAATGTACAACCTCTGTAAC  |                                                    |            | 39117 | A_95_P195662 | TA16166_4097 |
| 40212 | 474 | 7  | 884  | CGTGTGGCACAATGGGTAATATTTTCTGCTTGGATGTTTTATTATGCAATCATGCTGT. |                                                    |            | 39127 | A_95_P011886 | EB447549     |
| 40214 | 474 | 9  | 876  | GTTAGCTGTTGCCAGCTTTTTGGAATTTCTTGTGGTTCCTGAGGAGTTAATCTTAT    |                                                    |            | 39131 | A_95_P231869 | DV162468     |
| 40217 | 474 | 12 | 559  | CCATGGGCCACTGAAGAAGACTATGAAGTACAATAAATATAGCTATTAGAGAAGTCC   |                                                    |            | 39137 | A_95_P119682 | DV999152     |
| 40224 | 474 | 19 | 833  | AATTTCTTATCTTGCAGTGATGACTCTGGGATGTTGTGACGATGAGAGCTGTGTCGA   |                                                    |            | 39151 | A_95_P250427 | FG157464     |
| 40226 | 474 | 21 | 751  | CAGTAGTTTGATGTGAGATACTATATATTTTTCAGCCTTTTGCGAAAACCCATTCTTGC |                                                    |            | 39155 | A_95_P297573 | FG171924     |
| 40227 | 474 | 22 | 825  | AGTGTTCATACATACAGTGCCATGGTATGAGTGGCTGGAAAATGATTTTTGTAATC    |                                                    |            | 39157 | A_95_P214662 | DV998978     |
| 40230 | 474 | 25 | 479  | ATGTCCAAGAGTTTTTGTGCTCTTAGATATCAAATCATTCTGTCTAGCATTCTGGA    |                                                    |            | 39163 | A_95_P122112 | DW002152     |
| 40232 | 474 | 27 | 222  | ATGGCACAAGTGTCCCACTTAGTAGTATACTGGCCAAAGTGCAATTAGAGGCTATTT   |                                                    |            | 39167 | A_95_P174722 | EH665915     |
| 40240 | 474 | 35 | 195  | GTGAAACTTTCAAAGAGCTTGTGGTATTATGGAACCTTTGAAGAGATTCTGTCATA/   |                                                    |            | 39183 | A_95_P140812 | EB444643     |
| 40243 | 474 | 38 | 491  | ATGTACAAACTCGCCCTCCCCTGGGGTTGATGGAAGATAAGTAGATTAGTCTATGA.   |                                                    |            | 39189 | A_95_P039511 | BP129566     |
| 40249 | 474 | 44 | 963  | GATTCTCTGGGATGCCTGGAGGTTGAAAAATACAGCCTTTTCGTTGAGTTGAACTCA1  |                                                    |            | 39201 | A_95_P198082 | AY740530     |
| 40252 | 474 | 47 | 469  | AATGCCCATGAAAAGATTGATGTGCTTAAAGTTTTCAAAGTATGTATTCCAACCTCGG  |                                                    |            | 39207 | A_95_P224837 | FS406426     |
| 40258 | 474 | 53 | 531  | CCAAAAGATGCTGAGACAAGTTATAAGACCTGCTCTCGAGGAAATTGTTTGGTCTTG/  |                                                    |            | 39219 | A_95_P266871 | BP535412     |
| 40259 | 474 | 54 | 794  | GTGCAGTTTTGTTTGTGCTCACGTTTGATTTATTAAGCCTTTTGTGTTGACCACT.    |                                                    |            | 39221 | A_95_P190697 | EB680692     |
| 40260 | 474 | 55 | 324  | ATTGTGTTGCTATGGAGCTCAGGGTTGTAACCTAGTTTGTAAATGTAGGCAAAGCTA/  |                                                    |            | 39223 | A_95_P139612 | EB443417     |
| 40263 | 474 | 58 | 614  | GATGTTGGTTAAACGGCTGTCCCTCAGATGTCTGGAATTCACGAGACATCTCAAAAT   |                                                    |            | 39229 | A_95_P037686 | BP129070     |
| 40264 | 474 | 59 | 1577 | GTTGCCCTCCATTTATCATTCTTCTTCTGGAAGCATCTGTATTATCCACTGAGATI    |                                                    |            | 39231 | A_95_P016891 | TA14279_4097 |
| 40265 | 474 | 60 | 623  | GTGATTAGTCTTGAGACTAGTAATTTGCTGATACATTGCAACATACCAGTTATTTGTG  |                                                    |            | 39233 | A_95_P105577 | EB446038     |
| 40269 | 474 | 64 | 466  | TCAGTTGCTTGTATGTTTTACATTTGGTGGAAATTAATTAACGGTTTGAATCGCTTGC1 |                                                    |            | 39241 | A_95_P103502 | TA11915_4097 |
| 40272 | 474 | 67 | 363  | GCTCCAATGTAAGTTTTGCAGGCTTGAACCAATGTTAAGTAGTTTCAAAGATTAT     |                                                    |            | 39247 | A_95_P092338 | BP531754     |
| 40277 | 474 | 72 | 1098 | TCTTTGAATTATGCCCTGATTTGACGGGGGAACTAAAGGTGTGCTTTAAGTTTGACC   |                                                    |            | 39257 | A_95_P188132 | TA14501_4097 |
| 40281 | 474 | 76 | 491  | GAAGTTTATGACAGGCTTGGATGCTAGACGAATAGCAAAGCTCCCTGAACACAGTG/   |                                                    |            | 39265 | A_95_P047271 | BP131613     |

|       |     |    |      |                                                               |       |                           |
|-------|-----|----|------|---------------------------------------------------------------|-------|---------------------------|
| 40288 | 474 | 83 | 901  | AGAAATGACAGGGCAAATGTGACTGAATGCATTGGCGGATCACGAACAGTAACCT.      | 39278 | A_95_P259206 EB679951     |
| 40291 | 475 | 1  | 425  | TGGCAGTGTGCTGAAGGTTAACTACTTCATGTTGTGGATTAAGGTTTATGTGGATAT/    | 39283 | A_95_P002201 DW002911     |
| 40293 | 475 | 3  | 374  | GTGCAGTTAACTGGAAGAAGTTGTAGGCCATAAAGAACCAACATTGGTTGTGTAC/      | 39287 | A_95_P052566 BP132956     |
| 40298 | 475 | 8  | 1154 | GCCAGTATGCATTCGTGCTATACCTGCATTTTATGCCAGTTTTAATATATGAATATCG/   | 39295 | A_95_P201227 TA17378_4097 |
| 40300 | 475 | 10 | 154  | GTTGTAGTGAATACTCAAATCCCTATACTTTTCATGACAGATATAGTGTTCCTACTC     | 39299 | A_95_P142082 EB445644     |
| 40305 | 475 | 15 | 606  | GCTTGTTGTTACTTGTATTTGGGAATTGTGGTAGAGAACATTCTTGTAGTTTGTGTGA`   | 39309 | A_95_P189862 TA14878_4097 |
| 40307 | 475 | 17 | 947  | GATAACCACTCCTGGTACAGAATTAATAAATTTGAGCAATCATAGTGTACTACTTCCA    | 39313 | A_95_P082255 TA13610_4097 |
| 40313 | 475 | 23 | 366  | TGTTAGCCTTAGCACTTTACTAGCTCTATATCAGAATGGGCCTTCAGAGTTAGCTGGT    | 39325 | A_95_P080465 BP528009     |
| 40316 | 475 | 26 | 789  | CTTTCATCGATAGGTAAGCTAGCCCCTGTATGTCATTATTCATTTCTGAGCTCAGTCT    | 39331 | A_95_P135957 EB428177     |
| 40317 | 475 | 27 | 671  | AGCTACGGGTTACCAATTGTAAACGTCCAGTAACTGTTTCTTATTCTTCTTGCCTAA     | 39333 | A_95_P182872 DV160305     |
| 40319 | 475 | 29 | 665  | CTTCTCCGGTGAATGTGATCCATTACGGGATGGTGAAAATTGTCCCCAGTCAATGTT     | 39337 | A_95_P019326 TA17466_4097 |
| 40320 | 475 | 30 | 705  | TTGTTAATGATCTTGGGCACCATTTCTCTGAATCTCTGAATATTGAGGATGGTGAAGA    | 39339 | A_95_P017861 EB440968     |
| 40321 | 475 | 31 | 859  | ACATTGGCTCGAATAGTGTGATGTTCAAGCTGATATGCCAGGAGCTATGTTTCTACA/    | 39341 | A_95_P197342 DV157504     |
| 40322 | 475 | 32 | 838  | GTAGCTTTGTAATTTATTTTCATCTTTGTTTGGCTGCCAATCAAAGTAGAAAACCGTATG( | 39343 | A_95_P179097 TA12426_4097 |
| 40326 | 475 | 36 | 1700 | AGGCATCAAGAGGATTCATGTACTTTAATGAATGAAAACCAAAGAATTGCCGTCCT      | 39351 | A_95_P177577 TA12012_4097 |
| 40330 | 475 | 40 | 413  | TTGTAGTTTTTATCTCATTCTAGCAGAGGTCTGCCAGGTGTCGGGGCAAATTTAGT      | 39359 | A_95_P082015 BP528409     |
| 40332 | 475 | 42 | 290  | AAACGTTTGCCTGGACCTCATTTTGTATCTCTACAAAAGATGAAGTTAGAGCCCTGA     | 39363 | A_95_P108217 FG634551     |
| 40337 | 475 | 47 | 771  | CAACCAAACATGTAGACTGGTTCTAAATCTTGAAAATCCTCCTAGGAGACCACCTTGT    | 39373 | A_95_P267306 DW000135     |
| 40339 | 475 | 49 | 1176 | GTTGTCATATTCATCATACTGGCTATTATTCTTGACAGCTATCTGGAAACCGATCTTA    | 39377 | A_95_P007126 U60057       |
| 40346 | 475 | 56 | 543  | GTTCTCTGTTGCTGTTGCAATTCGAATCTGACTTGTAAATTGCTTGTAAATCGAATCAA   | 39391 | A_95_P036093 FS433957     |
| 40347 | 475 | 57 | 1277 | ACTGTTTGCCTTGTAAATAAAGACTTGAGATGCTTTGTTATCAAAGAAAGCACGAC      | 39393 | A_95_P145117 TA14320_4097 |
| 40348 | 475 | 58 | 1020 | CTTGCAATGACAAATCTTATAGCAGCATATCAACGAAATGAGATCTTGGAGTTTGAG,    | 39395 | A_95_P192737 TA15519_4097 |
| 40349 | 475 | 59 | 865  | CTGTTTGCAACTATGCAGATTTACATCATTTGTGAGTGCAAGAACTGCTTAATTATCA`   | 39397 | A_95_P232614 DV999247     |
| 40352 | 475 | 62 | 523  | TTTAAGTGGAGAACAGTAGAGCTGACCATTTATCTCCAGATCTCGAACCATGCACCA/    | 39403 | A_95_P073765 BP526296     |
| 40355 | 475 | 65 | 1099 | ATTGCAAGGGCAAATTGTCACTCCTGACTAGTAGTTTTCTTGAGATTGAATGTTTGAT    | 39409 | A_95_P245432 TA16830_4097 |
| 40360 | 475 | 70 | 391  | TGCGGCTGTTCTATTTCTCTCTACTGTTGCTGTGTGTGTGTATCTGGGTATTCTTG      | 39419 | A_95_P080460 BP528008     |
| 40363 | 475 | 73 | 874  | TCAATTTGGGATAATTAGTCTAGTTCACATCTTATCATAAGCATTCTGGTCCAGGAAC`   | 39425 | A_95_P008716 DW005082     |
| 40368 | 475 | 78 | 685  | CTCTCTTCTGTTGGTCCTATGAGACCGAATGAAAATGGATAAACATCTGATATTTTT(    | 39434 | A_95_P027596 FG163977     |
| 40380 | 476 | 5  | 434  | GACTCCTGTCCAAATTTGAACTTAAATGATTTATAGACTGCTTGTTCAGCGGCC        | 39291 | A_95_P266796 AM828280     |
| 40383 | 476 | 8  | 891  | CCATGGAAGAATGACTTGTATTTGCATGATAAAATCCATTTGTGAACTATTAGAGTGT    | 39296 | A_95_P249437 EB425035     |
| 40385 | 476 | 10 | 301  | TGGACTTGTGAAGTTTTATCGCAGGATTAGCTAGTGGGTTATTATCCTTCATTTGTTA`   | 39300 | A_95_P129927 EB429857     |
| 40387 | 476 | 12 | 668  | TCCACAACCTTCCAAGTATTTCTTTTGCAGAAATTCATTGAAGCTGGTTTCGATTCCC    | 39304 | A_95_P220102 EB678030     |
| 40389 | 476 | 14 | 790  | CTTCATAAGCACCTGTTTCTTGGTCAAAGGCTAGTTACTAAAAGAGGAAAAGATTCTTC   | 39308 | A_95_P163352 EH622376     |
| 40396 | 476 | 21 | 811  | AAGGCGAAAAAGGCGTTAGAAAAATACTATTCCGACGGGAATTATAGGCTTTTACAT     | 39322 | A_95_P139132 EB442824     |



|       |     |    |      |                                                             |       |                           |
|-------|-----|----|------|-------------------------------------------------------------|-------|---------------------------|
| 40397 | 476 | 22 | 421  | GCTCCAAAAAGTTCTCCTTGTTGACTTTTCAGTTTACACTACCAAATTTCTTGTATTGC | 39324 | A_95_P088528 BP530110     |
| 40403 | 476 | 28 | 749  | TTCTTATCCTGTTGCACCTTCTGTAATCCGTTTATGTGTTATGATGCTGGCTGGGTGCT | 39336 | A_95_P017976 EB424751     |
| 40404 | 476 | 29 | 1975 | CTCGTGTCTTAAGAGTACATTTTGTATGCAACTGCTCTATTGAGACATTATCATTTGA/ | 39338 | A_95_P011396 TA15759_4097 |
| 40407 | 476 | 32 | 716  | GTGTTGCAGACTCATGGGAAGTTCCTTTTGTAACTCTTACATGAATAAACTTCCTTI   | 39344 | A_95_P013286 DV158510     |
| 40424 | 476 | 49 | 627  | GCTCCAAATTTGGGTAAAAATGTGCAACCTTTATCCATGAATTTATCATGACAGTTCTI | 39378 | A_95_P245342 DW002215     |
| 40425 | 476 | 50 | 304  | AGAGGCAACACTACCGTAGGTAGCCCTTACTTGTACTTTTCTTTATTGTTTCTTTT    | 39380 | A_95_P004651 EH622738     |
| 40427 | 476 | 52 | 841  | CTGGCCATTGGATTGTCAACTGGTTTTCTAGGAAGCCTTACAACCTTTAGTGGTTGGA  | 39384 | A_95_P216127 EB681526     |
| 40430 | 476 | 55 | 521  | ACATAGTTCTGCAAACATACTGTAAGAGGTAGCTGGTAAGGAAAGTGTCTTACCTT    | 39390 | A_95_P273963 AM793740     |
| 40431 | 476 | 56 | 701  | TAGGGGAATGTAAGTGCATGTGTTTGTATTGTGCATGTTGAAGTTTGCACCTTGATT   | 39392 | A_95_P208492 DV158298     |
| 40439 | 476 | 64 | 621  | TTTATTCTGACCAAAGATGATACATTTGTGACTTATTGATCAGTGTAGTGGTTCACCT  | 39408 | A_95_P122837 DW002778     |
| 40441 | 476 | 66 | 700  | AGGCGAAGTTTACCTTTAGTAGATCCCAAGTTGAAGCTTTGTCCAATGAAACAAGT/   | 39412 | A_95_P068570 BP137159     |
| 40442 | 476 | 67 | 848  | AGATGGGAATTGGCTCGAGCATTTGACACCTTAAATGTATTGCAAGTGGTGAGGTTG   | 39414 | A_95_P218077 EB439797     |
| 40443 | 476 | 68 | 661  | GATATTTGTTTCTCCTCCTCATTCAATGCCAAGTGATGCGGCTAGCGGATCCATTTTG  | 39416 | A_95_P270196 FG636806     |
| 40445 | 476 | 70 | 77   | GTATGGAAGCATCTTGTATAATTTTGATTGACCTGCTGTTGGGGCTATAAAATTTTCC  | 39420 | A_95_P129232 EB428947     |
| 40447 | 476 | 72 | 497  | AAGCCTCATTGGTTCGATAAATAAGCTCTATGTGACAGGTTTTCTTTGTTCAAATAGA  | 39424 | A_95_P063955 BP135917     |
| 40450 | 476 | 75 | 451  | ATGCCCTTGAGATAGTTTTCTTATTGTTGATGTATTACACGAGGTTTACTCTTTGT    | 39429 | A_95_P088908 BP530268     |
| 40457 | 476 | 82 | 180  | AAATATCCCTGACGTAGTTTGCTCACTATTTCTGACTCCTCTACAGGCACCAGATCTA  | 39443 | A_95_P109712 CV019423     |
| 40464 | 477 | 4  | 718  | CATCTTAGCCACTTGTTCCAGCTTACCCAGTCAGAGCAAAGTGTCTTTTGTCTACA/   | 39455 | A_95_P253199 EH619700     |
| 40465 | 477 | 5  | 1907 | TTTCGAGGCATCTCAAAGTGTCATATCATGAGATTAAGTTTTCGTTTGGTGGCTAAAA  | 39457 | A_95_P069920 X70651       |
| 40468 | 477 | 8  | 732  | CATGATCATTATGTTGGATACTTTGATGGAGCAGTAGGATAATGTCATTTGTAGTTGC  | 39463 | A_95_P116507 DV159272     |
| 40469 | 477 | 9  | 513  | CTAGCTCTATCCCTATCTCTCTTACTGAACAGCTAGTTAGCTGTGTTATTTGATCTTTC | 39465 | A_95_P074560 BP526504     |
| 40470 | 477 | 10 | 1289 | AATATTGTACCAGAGCATTACCAATTGTTAAGTTGCAATACAGCAATTGGTGGCCA/   | 39467 | A_95_P028041 TA14403_4097 |
| 40473 | 477 | 13 | 739  | TTCCTGATCTGTGTTACTACTTAAGACAAAGGGTTGCTCTGATGGTAAGCAACCTCC   | 39473 | A_95_P147497 EB451962     |
| 40476 | 477 | 16 | 506  | GTTCTTTCCTTATTTTCTCTAGCTATCTGCTGAAGTATCTGATGAGCCGGAACCTTGA  | 39477 | A_95_P086435 BP529536     |
| 40480 | 477 | 20 | 312  | ATCGAAAATATTGATCAGTGTATGGCTTACAGGATTATCGAATGGAGTAAAGGAT     | 39485 | A_95_P188102 TA14495_4097 |
| 40482 | 477 | 22 | 568  | TCGTGTTCTGATCTGATTAATCGTCTTGTAACTGTTACAAGCTGTGGCTATGTAAAA/  | 39489 | A_95_P003611 FG642155     |
| 40486 | 477 | 26 | 857  | GAAGTGAAGTTCTCGCTTGATCAACTTGATCTGTAGAAAACCTAATTAATCTGCA/    | 39497 | A_95_P190932 DV159857     |
| 40487 | 477 | 27 | 509  | TACCTGCCTTTATTTTATTAACGGTCAGCATTATGATGCGTACTTGTTCATCTACTATC | 39499 | A_95_P076315 BP526954     |
| 40490 | 477 | 30 | 741  | ATGAGATGGTACGCTACTCAACACATGCTTGAGAACGGTAGCTTCATTCTTGTTGGA(  | 39505 | A_95_P292378 EB428451     |
| 40497 | 477 | 37 | 232  | ATTGTGGTTGCATAACTGTGCTCATCTGTCAAGGAACCATCATGGCATCTCTGTAT    | 39518 | A_95_P102842 CV016229     |
| 40500 | 477 | 40 | 325  | AGAGGAATGTCCAAAAGCATTAGATAAAGAAAGTGTGGACAAAACAGTGGTGTA      | 39524 | A_95_P116362 FG634672     |
| 40504 | 477 | 44 | 864  | CTAGTGACAATATGCAGTTGCTTTTCTCTAATTCTTCTCAAACCTTTACTACCTGTTCC | 39532 | A_95_P196382 TA16326_4097 |
| 40506 | 477 | 46 | 568  | TTTTATCTCCGTGATATGCGTCAGCTGTCAGGGATGTTGCCAAGTATTTCCAACAGCA  | 39536 | A_95_P039136 BP129464     |
| 40507 | 477 | 47 | 394  | TTGGGGTCATAATATGGGAACCTTACACTCAAAAAACCATGGGAAGGTGTTCCAT     | 39538 | A_95_P085820 BP529385     |

|       |     |    |      |                                                             |       |                           |
|-------|-----|----|------|-------------------------------------------------------------|-------|---------------------------|
| 40510 | 477 | 50 | 813  | AGTATACAGCCAGTGAGATAGATGTTTCTACGAAAGAGTCAGACAGCGAGCTCTCCT   | 39542 | A_95_P310093 FG134997     |
| 40511 | 477 | 51 | 408  | GCTTGTGTAGCAAATGTGGAATATTTGCCTATGGTATATCATATATTGCCAAGCGCTT  | 39544 | A_95_P006221 TA15867_4097 |
| 40518 | 477 | 58 | 286  | TTGCGTATTAACAAGACTGTGTCATGTGCTGGAGCTGATAAGGCACCAAACAGGCAT   | 39557 | A_95_P106107 CV017757     |
| 40520 | 477 | 60 | 1064 | GCGTGCCTATGCAATGTCCTGTCCATGCATAATGAAGTTTGAATTCTGCTAGTTCATT  | 39561 | A_95_P132737 TA12370_4097 |
| 40522 | 477 | 62 | 102  | TAGTATGTTGATCGTATCCAGCCTTCAGGTGAAGCTCAATACCATGCTGCTCATTCTC  | 39565 | A_95_P137972 EB441688     |
| 40532 | 477 | 72 | 170  | TGTAACCTATAGCAGAGATACTCAGGAGATATGGCTGAAGAAAACAAAGCATTGGA    | 39585 | A_95_P128052 EB427609     |
| 40534 | 477 | 74 | 756  | ATTGTACCAAGGGAGGACTTGAAAGATGAGGTGCTTGCATCAATTCCTAGAGGAAC    | 39589 | A_95_P028541 EB444615     |
| 40535 | 477 | 75 | 420  | TTTAAAATTTCAAATTCACATTCGATGCCGAAACCCATCAAATCACGTCCGATGTG    | 39591 | A_95_P038666 BP129332     |
| 40539 | 477 | 79 | 743  | TTGAGAAATTTCTGAAGGGAGCTTCCAGTGTGATCAGCATTTCTACTCAGCACCTT    | 39599 | A_95_P151227 EB681454     |
| 40541 | 477 | 81 | 545  | AAGCCAGGCTTAAGGCCTATTCAGCTAACCTGTCAGAGTCAACAGCAAAAAGAAGTA   | 39603 | A_95_P064390 BP136039     |
| 40545 | 477 | 85 | 132  | AGCCATGATTTCTGGGACTTTCTCTATAATCCAGCAATCGCTCGCATTAAAGATGCTTC | 39611 | A_95_P242507 DQ460155     |
| 40546 | 478 | 1  | 483  | GTAGTAGTAGCATATATTTAGAAGTGTGGTGTGCTTTTGACCATGAGGGTTGAG      | 39451 | A_95_P001346 FG623263     |
| 40552 | 478 | 7  | 558  | GTTAAGGCCATTCTCCTGATAGTTATACCAAATGACCGTCTTGTTGTAATAGTAAT    | 39462 | A_95_P124172 FG633796     |
| 40556 | 478 | 11 | 1640 | GATGAGGATAGAAATAGGATTATGGATGCTCCTGACCATGTACACTTAAACATATC    | 39470 | A_95_P133287 TA12715_4097 |
| 40558 | 478 | 13 | 305  | TGCAAGTGAGCTTGAGGTCTTAATGATGCATAACAAGAAGTACTGTGCAGAGATTG    | 39474 | A_95_P109982 DW001669     |
| 40559 | 478 | 14 | 903  | TGGGTTTGTGAAGTTGAGCCAACAATCACATGGCGAATGGATAATGAAGGCGCTAA    | 39475 | A_95_P016041 TC48562      |
| 40560 | 478 | 15 | 894  | TTTTCAAATTTGCGGCCCTGTTTGTGAAGGTCAACATAATCGCGCCCCCTTTTG/     | 39476 | A_95_P099848 BP535091     |
| 40562 | 478 | 17 | 94   | TTAGGGTTTAGAGAATCAGATCGGTGAAGAGAGACAGACATGTCCGATCAGAGATT    | 39480 | A_95_P049811 FS419162     |
| 40565 | 478 | 20 | 929  | CTGATTTGGAGGTCAGCTTTTTGGTTAAGTTATGTTGGTTGTTAAATATAGGAACGG/  | 39486 | A_95_P217047 TA20843_4097 |
| 40569 | 478 | 24 | 469  | TCAGACCTTTTTCTAGCTGAGCGAGATAGCATTTTAATTGAGGACTCTTTATTTACTT  | 39494 | A_95_P123947 DW003808     |
| 40574 | 478 | 29 | 485  | AGACATTGAATGCTTCTTATCTGATTCTCAAGAGAGCCATGTTCCGCGGAAAAGATGA  | 39504 | A_95_P145252 EB448852     |
| 40578 | 478 | 33 | 512  | GTAGAAACATTTTCTTCTTCTTTTGTGCGCTGGCTTCTTCAAAGCCATTGTATGCT    | 39511 | A_95_P222722 TA22096_4097 |
| 40579 | 478 | 34 | 700  | GTTAAAGCATTAGATGCTGTTTGAATGTAACAATAGACGTACTTGGGAAAATTGTGG   | 39513 | A_95_P022581 TA19428_4097 |
| 40585 | 478 | 40 | 182  | ACCAATACCAATCTTTGTCCATCATCCAACAGATATATGACTTAAATTTGTGACTGCT  | 39525 | A_95_P100058 BP535194     |
| 40588 | 478 | 43 | 529  | CTACTTAGTTTGGAACTCTTTGTGAAAAATGCTTATAATAACTGCCTCCTCTCATATTG | 39531 | A_95_P162627 TA13077_4097 |
| 40591 | 478 | 46 | 309  | AAATTATGTCGATCGAGCGGTGAAAGATGATGATAAGGTAAAGGAGAGCGTTTAC     | 39537 | A_95_P103042 FG143585     |
| 40596 | 478 | 51 | 675  | GAAGTTCATACATTTCCGGGCTTCTCCTAGTGATAAAAAAGCTATTTAACACATTGTT  | 39545 | A_95_P134572 EB437111     |
| 40599 | 478 | 54 | 166  | GAAGCTTTTGCCACACGCTCGCTCTCTTTCATCTCTAAAGAGTGCAGAGTGAAAAGAT  | 39550 | A_95_P061425 BP135256     |
| 40602 | 478 | 57 | 303  | ATTTGCGCTTATTCCGGCCCTTAAATTAGTCTTGCTTAAACCAGGTATTCATTGTGA   | 39556 | A_95_P190787 TA15089_4097 |
| 40603 | 478 | 58 | 788  | TATACCAGATTGGATTGTTATGTAAGAGAGAAGGTTAAGTTGTGCTGCGCCTTTCTC   | 39558 | A_95_P180437 TA12745_4097 |
| 40606 | 478 | 61 | 545  | AGAAGAAGGTTTGTGTATATTCTTGCATATTGAGGGACCTTTAAGGGAAAGTACA     | 39564 | A_95_P132052 EB432481     |
| 40608 | 478 | 63 | 741  | TAAGCACTGATGATGTCTACAAAAGTGCTGAGGTTGTCAACCTTGTACCCAAGAGC    | 39568 | A_95_P182047 TA13121_4097 |
| 40609 | 478 | 64 | 151  | CCAGACTATCAAATGGAATTTACCAAGATTTCTGATTGATAAGGAAGGGAAAGTTA    | 39570 | A_95_P055691 BP133768     |
| 40611 | 478 | 66 | 732  | TGCTTATGTTTACTCGTCTTTGTCAAGGATATTTGAGCTCTATCAACTTTGATACCAA  | 39574 | A_95_P014306 TA12020_4097 |

|       |     |    |      |                                                             |       |              |              |
|-------|-----|----|------|-------------------------------------------------------------|-------|--------------|--------------|
| 40618 | 478 | 73 | 735  | AATAACAGCTACCTGTTCTCTATTTTTACTGATTGCAACTGTCTGTTGATTTACAGATG | 39588 | A_95_P183657 | EH622517     |
| 40620 | 478 | 75 | 744  | TTCATATTATTGTATCGTGTATGCCATCAATTGATTGTGTGCGGCTGTTGACTTGTGT  | 39592 | A_95_P142597 | EB446030     |
| 40624 | 478 | 79 | 813  | AGATTTAGAGTTAGCTACGATGAGAGTATGACCTTCAGAGCAGCAGCTTCTGCTGCA   | 39600 | A_95_P275718 | FG144926     |
| 40626 | 478 | 81 | 868  | GATATACTCTAATATCTTAGAGCTGGTAACTTAGAGTTGTGTATATGTCGAGATACTC  | 39604 | A_95_P149452 | EB679292     |
| 40629 | 478 | 84 | 624  | CTTGGTATTGTTCCATTGAAATTGTGTTGCAAAAGGTCAGGATTGCATTGAAATCTAT  | 39610 | A_95_P117872 | DV160841     |
| 40631 | 479 | 1  | 837  | GCCATTTTAGTTTCGATCACAACCAATGCCGACTATCTAGAATCAACATTTATTGTTTC | 39613 | A_95_P233624 | DV160352     |
| 40634 | 479 | 4  | 763  | GCACAAGTATCATATGCATTTTCATTAGAAAAGATGCATCCAGAAAATTCAAAAC/    | 39619 | A_95_P251427 | FG147735     |
| 40635 | 479 | 5  | 462  | GTTTGACAATTTGTACAACAATGATATTACTGCAATTGTGGTTCATGCAACAAGAGCT  | 39621 | A_95_P145817 | EB449557     |
| 40636 | 479 | 6  | 284  | AATTGTGTACAACCTGCCCTCGTTAACCAAAGTTTACTACTATTGATTCTGTTTTCTGT | 39623 | A_95_P143242 | EB446589     |
| 40637 | 479 | 7  | 892  | AAGGTGTAAACGCTTCACTACAATAACAATGCTGTGTAAGATGTTTGGTGGATTGTC   | 39625 | A_95_P025326 | TA20015_4097 |
| 40639 | 479 | 9  | 352  | ATGAGGGTTTGGATTTTGATTCCCCTCTTGATTCTTCTTCTTCTGTTTTGGTTGAGT   | 39629 | A_95_P001206 | EH618849     |
| 40641 | 479 | 11 | 0    | TGGTCAAGATAGTCGCTTAGTGCTATGGTGATTAATAATTTGACATGGTGGCATTAAA  | 39633 | A_95_P239614 | A_95_P239614 |
| 40642 | 479 | 12 | 1510 | GGTGGTCTCAAGGCCAGAATAATTTTCTCTGTATTTTCTTGGTGGGTCATTTATCTT/  | 39635 | A_95_P092018 | Z93769       |
| 40647 | 479 | 17 | 689  | CTGTTGCATTCTTTGTTTAAAGGTAATATGGATTGTTGCCCAAAGACTCATGTACCA   | 39645 | A_95_P151777 | EB682025     |
| 40650 | 479 | 20 | 391  | TACCATACCCGAGTTTGTAACTCTCGCACTATATTGAACATCTAGTTGTAGCAGTTTT  | 39651 | A_95_P001851 | AJ718707     |
| 40651 | 479 | 21 | 796  | GCTGTGTAAGACGATGGTCAATATATGTTTTAGTGCTGTCTGTTTTAGGTATATTTT   | 39653 | A_95_P010866 | TA12119_4097 |
| 40652 | 479 | 22 | 0    | AAGATATCTCTGCACTCTGTGCACAAACTCGCTTAGCAGACCGTTACATGCACTG     | 39655 | A_95_P294883 | A_95_P294883 |
| 40660 | 479 | 30 | 1542 | GAGTGACATCTGTAATAACAGAATGTTGGATAACAATGGCTTTGTGAAATACTCTTC   | 39670 | A_95_P183327 | TA13434_4097 |
| 40662 | 479 | 32 | 246  | GGTGTACCAGAAAAGGTGTACCTTATAGCATTCCATTTGATTTTTCATGACATGAAT   | 39673 | A_95_P028656 | EB430793     |
| 40663 | 479 | 33 | 699  | GGAAGACTGGGTTGACTCTTGGTCTTTTCTGGACTCTTTCAAATATTAGAGTGGAG/   | 39675 | A_95_P298953 | FG194724     |
| 40664 | 479 | 34 | 87   | TATCATATTGGATGTACATCTCAACCCGTCAGTAACCCGTCGAAGCAATAGGGCGTGC/ | 39677 | A_95_P088553 | BP530122     |
| 40669 | 479 | 39 | 581  | TGGAATTATCACTAGTATTCATGGACCCACTTAAAAAGAGGGATTTGGCTGGAACCT   | 39687 | A_95_P019526 | TA17909_4097 |
| 40670 | 479 | 40 | 750  | GCCTTACAAAGCAGGGATTTGGGAACTATTTTAAACATCTTTAACTCTTTTAACTGC   | 39689 | A_95_P264106 | EB439549     |
| 40674 | 479 | 44 | 538  | AATTAGGACGTTTGGGGGATTTGTTTTCAACGGTGACGATGGTGTAAAGTTTACGG    | 39697 | A_95_P061075 | BP135171     |
| 40678 | 479 | 48 | 293  | GGTCCCAATTTGGTGGTGACCTTGGATTGTTTTGAATAGTTACTGAATATTTTGTCT   | 39705 | A_95_P151767 | EB682017     |
| 40684 | 479 | 54 | 619  | AGTTTAGATAGCTGGCCTCCGTTAGAATTCTCACGCTGTTTAGTTAAAAATATGGATT  | 39717 | A_95_P152832 | EB683169     |
| 40685 | 479 | 55 | 792  | TAGACATATGGACATGTGGAATCATCTTGTTTGTATTGAATGCTGGATATTTGCCATT  | 39719 | A_95_P128872 | EB428605     |
| 40686 | 479 | 56 | 0    | GATGAATGTTAGCAAGGGGGAAATGTAATGTAACCTGTACTTTGGTTGTCAACACAA   | 39721 | A_95_P242762 | A_95_P242762 |
| 40687 | 479 | 57 | 917  | GGTATTTAAGTTCCTTCACTGTTACTCTCTATATCTTGCTGTCAAAGTTGTGTGGAATT | 39723 | A_95_P249932 | EB677695     |
| 40688 | 479 | 58 | 571  | ATAGAACAAGACTTATCGCTCTCTTGATCCTGTCCCCCTTCTTCTCTGATTAGGAA    | 39725 | A_95_P131597 | EB431943     |
| 40694 | 479 | 64 | 185  | ATACTCCAGATAACAGCTTTCTTGGTGCTCGTGATGCCATTGGAATTACTTCCCTTTAT | 39737 | A_95_P311148 | FG167536     |
| 40702 | 479 | 72 | 516  | ATTATACTGTGTAACCTGGATTGCTATTAGTTTGGTTGAAGCAGCAGCCAGAGTTTTTA | 39753 | A_95_P018941 | BP131365     |
| 40703 | 479 | 73 | 328  | CTGATTTTCATGTAACCTGTACAATTCAGACGAAAATTGTGTGGATATAAATGTGGCT  | 39755 | A_95_P209532 | TA19210_4097 |
| 40704 | 479 | 74 | 824  | ATTTGTATCCTCAGCAAATTTATGGCACAAATGGCTGGTATGGCTATGGTATGCCAC   | 39757 | A_95_P241664 | FG166039     |

|       |     |    |      |                                                               |       |                           |
|-------|-----|----|------|---------------------------------------------------------------|-------|---------------------------|
| 40705 | 479 | 75 | 631  | CAGTTAGACGTATATAATGCAGCCTCTTTGGATGGTCTTATTGGACACTTAGTGTGA     | 39759 | A_95_P065735 BP136410     |
| 40712 | 479 | 82 | 284  | CAGTGAACAAATTAATCTTAAATTTAACAGAGATGGATGGGTGTCAGCCTTTATG       | 39772 | A_95_P114032 CV021413     |
| 40714 | 479 | 84 | 633  | AACATGACATGGGTGACATGATCAACTCTCTATTTGCTATGGAGATTAAGTATTTGC     | 39776 | A_95_P014791 FG637726     |
| 40715 | 479 | 85 | 895  | ATATCAAGGACAGACGGTGCACCTATTACCTTTCAGACCAAGTTTCAGCCACATCTC     | 39778 | A_95_P291693 EB680171     |
| 40720 | 480 | 5  | 738  | AGCATTGATGGTGTACAACCTTGACTTGTATTTTCTGCCATTGCTTTGCCCTCTTT      | 39622 | A_95_P195702 EB678808     |
| 40729 | 480 | 14 | 834  | CCTAATCTCTACGAATCTGTGCAATACAGCAGCTGGTATTGCTGAGCACTGTGTTATG    | 39640 | A_95_P310728 FG149203     |
| 40733 | 480 | 18 | 660  | GTTGTGTTCTCCTTATATGTCCTTTTGTCTATTGTACTCAAATGACATATGCAGACAT    | 39648 | A_95_P043456 BP130619     |
| 40735 | 480 | 20 | 268  | AAATGTTACAGCATGTTTTGCTGACATATCTAATTATAAACCCAAAGTTTCCCTGCC     | 39652 | A_95_P160152 EH618800     |
| 40738 | 480 | 23 | 1043 | GGTGGTGAGGGGTGGGTAGTACTTTTAAATTATAATGAGATTATTCAGTGCTTATTT     | 39658 | A_95_P028166 TA17665_4097 |
| 40748 | 480 | 33 | 812  | TATCTTACAATGAGCCAAATGTTATAATCCACAGAGATCTAAAGCCAGGAATGTT       | 39676 | A_95_P138162 DV162248     |
| 40754 | 480 | 39 | 621  | CATATCCTAGCAAAGTGTAACAAGAATCTTACTCCTACCCCTTGCTTCTGGTGCTGG     | 39688 | A_95_P299108 FG635787     |
| 40758 | 480 | 43 | 151  | GCTGAGTTCTGTCAATTTGTGCTCAGCACCGGTATATTAACATAGACAGATTGTCTT     | 39696 | A_95_P104247 CV016907     |
| 40761 | 480 | 46 | 793  | GCTGTATAATTCATTGACAGAGCTAGCTGGAGCAATTTTCGCAGCCATTATATAATAT    | 39702 | A_95_P194952 EB446333     |
| 40762 | 480 | 47 | 714  | AATGCAGGGCAGAGGCAGCAAGAAAAGGTGATTTGTCACCTATGCATAACGGAAAA      | 39704 | A_95_P115737 DV158063     |
| 40764 | 480 | 49 | 358  | CATTGGTTAAGTGAAGCAGCTTTATATCTCAGTAGATAGACCAGTTGCTATCTGTTTT    | 39708 | A_95_P089778 BP530650     |
| 40765 | 480 | 50 | 474  | CGTTGTGTATAACAAGTAGTTGTGTGGTTTGAACATGAGCATCTCTGCTTCTGGTGTT    | 39710 | A_95_P106877 EH620447     |
| 40768 | 480 | 53 | 862  | AGTCATCCCTTTGGCCGTTTACTTATCTCTTATTCCCATCATCGGTGGCTGTGGTCTT    | 39716 | A_95_P199977 TA17111_4097 |
| 40770 | 480 | 55 | 499  | TCCGCTTTGTAATGACCGAAAGATATTTCTTTGCTGTTACTTAGAATGATACTGATA     | 39720 | A_95_P071600 FG641857     |
| 40774 | 480 | 59 | 599  | CTGCATGCTGTGGTTGAGGGTTATACGCAACTGTAAGGTTGTTCAACTGTCTGAAC      | 39728 | A_95_P044041 BP130775     |
| 40775 | 480 | 60 | 802  | TGTATCCTATGCGTGAGTGATCCAGCATCTAGTTACGTCTGTCAAACCTGTTCCGAAAC   | 39730 | A_95_P265821 FG148043     |
| 40777 | 480 | 62 | 877  | CCGGTCCATGCGTGAAGACCCTCTTCTGATATGGATCCAAATGAAAAATTTTATGCT     | 39734 | A_95_P224522 EB441919     |
| 40780 | 480 | 65 | 227  | GGCCTTAACTTTTCGCAAGCTGTACAGTGCTTGTCTTTCTCTTTTCTCATTTAGTTGTTCA | 39740 | A_95_P132862 EB433652     |
| 40782 | 480 | 67 | 371  | TTGTATCTCAAAACATTGTCCATTGTACTTTCTGCTTGGTCGTGTTATACTGGAATTGE   | 39744 | A_95_P106072 FG625538     |
| 40787 | 480 | 72 | 822  | GCAATTAGTGTAACCTACAGCGTCTACATGAAAGCAGGAACTCTCACGTTAGATCTT     | 39754 | A_95_P273026 EB680914     |
| 40789 | 480 | 74 | 460  | TGCCTTCTTTGCCAAAATACGTTAAGCATGTAACAGGCTATTAGCTATTTTGAGTTTC    | 39758 | A_95_P124722 TA16894_4097 |
| 40797 | 480 | 82 | 890  | AATATGATGGGAGGATTTACCAGTCTTTTGTGGGTTGAAATAAGAATATTGCGAC       | 39773 | A_95_P011196 TC42564      |
| 40800 | 480 | 85 | 1037 | CTGCTGCTGGACAAAACCTTTCATTCCATCTTATAGGTTATTTGAAGATCTTAATGT     | 39779 | A_95_P023961 TA14913_4097 |
| 40801 | 481 | 1  | 349  | CAAGTTCACCTAACATACTCTCTTATGCAGATTTCTATCAGTTGGCTAGAGTGTTGC     | 39780 | A_95_P113642 CV021236     |
| 40809 | 481 | 9  | 823  | CTATATCTTTACCCACTTCATGCACGCAGCATATGATATTGGACTTTTTGACTTTTTGC   | 39795 | A_95_P222497 DV158650     |
| 40811 | 481 | 11 | 478  | GGTAGCAAACTCTGTAGAGCTTATGACTTGTACTACCGTTTTGGGAATTGTAAT        | 39799 | A_95_P308903 FG643908     |
| 40813 | 481 | 13 | 1111 | CTGCGGTGCGGGCTGCAATTAAGGTGAAAGCATCAGTAATTATTTGCTTCACTTCAT     | 39803 | A_95_P021596 TA17748_4097 |
| 40816 | 481 | 16 | 437  | ACTTTGTTAGTTTGTATGTCTTGAAAACTTGTTAGTGGCAAATGCCTAGCTAGCTT      | 39809 | A_95_P076270 BP526941     |
| 40820 | 481 | 20 | 499  | CGGCTCTTTCGCTTTGTACAGTAATTCAGATGCATCATGTTATAGAAGCAGTTAGTTT    | 39817 | A_95_P072770 BP526045     |
| 40821 | 481 | 21 | 780  | AGAATTGAGAGCCTACAGAAACATAATTTTGGAGTTCCTTTTGTCTAACAGGCAATTC    | 39819 | A_95_P026736 TA17743_4097 |

|       |     |    |      |                                                              |       |                           |
|-------|-----|----|------|--------------------------------------------------------------|-------|---------------------------|
| 40822 | 481 | 22 | 707  | CATGGTAATGTACATGTATTGTGTAGGTGAGTTAATGTCAAAGCTTTGGTAGGATAT,   | 39821 | A_95_P013946 TA16897_4097 |
| 40825 | 481 | 25 | 231  | AGTAAGGAGCATAGTCTGTCAAATTGTGATGGAAATGGTGCAGTGCCTGCTCAC/      | 39827 | A_95_P107842 CV018551     |
| 40832 | 481 | 32 | 601  | TATCTCAGACGAGGCGAATTGATGATTCTAGTTCGGATGATGACACTCCTTGAGTAC(   | 39841 | A_95_P043956 BP130755     |
| 40836 | 481 | 36 | 729  | ATGATGCGTTATGAGATTCTGGGTTTAGTAAAAGGTCTGACGGCTGCACCTAAGAGT    | 39849 | A_95_P145802 EB449549     |
| 40843 | 481 | 43 | 524  | ACAGCTATGTCTCAATCCCAGGATTTTGTATTGCGAGGATTCATCATAAACAGAATA    | 39863 | A_95_P070820 BP525545     |
| 40845 | 481 | 45 | 729  | GAAGAACATTAAGACTTGTACAGCATGCTTTCTCACATTCCACACCTTTCTTCTTT(    | 39867 | A_95_P300223 FG197293     |
| 40849 | 481 | 49 | 373  | TTACTGGTTACAGTTAGGAATTTTATTGGTGCTTCTTCTTGTAAATTCTGAAGAGAGT   | 39875 | A_95_P069700 BP137460     |
| 40853 | 481 | 53 | 468  | TTGCCTCAGTTCGGATTGTTCTCTGCAACTCGGGAACATGAAGTTGGAATCGCTAGT/   | 39883 | A_95_P198567 TA16807_4097 |
| 40860 | 481 | 60 | 398  | AGCTAGTAATGGGCATCGGTTATCAGCTGTTGTACTTTAAGAAATCCTCTCAGTTTAC   | 39896 | A_95_P211202 TA19559_4097 |
| 40868 | 481 | 68 | 864  | CATTTTTTGCAGCAAATCAAGCCATTTTGTGTTCCAGATCTGGCATTAAATCCTTGCC   | 39912 | A_95_P020406 EB683273     |
| 40871 | 481 | 71 | 171  | CAGGGAATGATATGACGGATTGTTGATGGCGTCTTTGTACTTGCTTTGTTGATGAC(    | 39918 | A_95_P092888 FG624161     |
| 40872 | 481 | 72 | 432  | GCGTGTAAGGCTAGCTAAAGACATATTGTCTATAATTAGTTGAGCGTCAGTTGTTG(    | 39920 | A_95_P123977 DW003836     |
| 40876 | 481 | 76 | 550  | CACCAGAAAGATTTCAAGCACACAGTTATGTATTTACCGCTTGTTTGCATATATGAC    | 39928 | A_95_P304663 FG643471     |
| 40878 | 481 | 78 | 620  | CAAATTCACAGCTGCACATTTCTGATCATTTTTACTTCTATGTTAATGATTAGTGGCC   | 39932 | A_95_P028786 EB445150     |
| 40880 | 481 | 80 | 261  | GGTCTTAACCTCAAGATGATAAAATTCTGACATATCGAATGGCACATCTTCGGTTAG    | 39936 | A_95_P109247 CV019208     |
| 40882 | 481 | 82 | 363  | GCAGAATGGACAAGTATTTCTTTGTCATCAATTGAGCGCATGCCTGAGAAATCTGCT(   | 39940 | A_95_P082190 AM833236     |
| 40887 | 482 | 2  | 811  | GAGATCCCATATAGCTTTGCGGATATTGAAGCACTGCAATTTATTGAAGTGATCAAAT   | 39783 | A_95_P296288 EB451171     |
| 40896 | 482 | 11 | 422  | GGAAGCTGATTTGGGCTGTAACACGAACTTATCAATATATAGAATACAAGTTGGCTT(   | 39800 | A_95_P003461 DW002887     |
| 40897 | 482 | 12 | 257  | GTAAGGAAAGAAATGCTTGGGTTACATGAGATCAATTGGATGTTATTTGAATGCTTA`   | 39802 | A_95_P212692 TA19890_4097 |
| 40906 | 482 | 21 | 559  | TGCTAACTCTGTATTTGGGCTTTCAAATGTGTGACTAGATTGTCTAGATAATGATTC(   | 39820 | A_95_P213862 TA20138_4097 |
| 40907 | 482 | 22 | 725  | TCATCCTTCTAAAAGGTCCGCTAGGTAAGTGTGCTTTACCGGTGATTATGACCAGAA    | 39822 | A_95_P193022 TA15582_4097 |
| 40915 | 482 | 30 | 223  | TTTCTTGTTGAAGATGATGGAGGTTTCAGTTGCTTTGAAACTGGAAGAAATTTGAAT(   | 39838 | A_95_P213477 TA20057_4097 |
| 40916 | 482 | 31 | 591  | CCAAGGAGTTTGAAGGCGTTTAGTGTTTTATTTCTAGTCGTTATTATATGCGTACAA`   | 39840 | A_95_P306623 FG644296     |
| 40918 | 482 | 33 | 155  | GTGGGATGTTACCTTTGGCTATGTAATAAATAGAATTTGTGACTGAGCTTCCTTATA    | 39844 | A_95_P114167 CV021477     |
| 40919 | 482 | 34 | 802  | TATAATGATGAAACCTAAGCCAGCTAAGCCGGCAACTCCTGAAACAACCTCACATGC/   | 39846 | A_95_P070315 FG132790     |
| 40920 | 482 | 35 | 408  | TTGCTTTACTAGGAGAAACTAGTAGCAACAGTTAGCTGCTTTGAATAAAAATCTGTCAT  | 39848 | A_95_P214212 TA20212_4097 |
| 40927 | 482 | 42 | 890  | GAGTACAACCTCAACCACAACCACAACCATTTGAATGGATCGAATCCTCCTTTGTT`    | 39862 | A_95_P217437 EB428317     |
| 40931 | 482 | 46 | 684  | CACCAGCATCAGCATCATCATCATCATCATCATCACTATTCAATTATAGATGT        | 39870 | A_95_P312863 FG163611     |
| 40935 | 482 | 50 | 85   | GTTTGTGCGGTATGTTAATTATAATGTGGCTTTTTGGTCATTTTCGATCTGACATGGTAI | 39878 | A_95_P108747 CV018987     |
| 40936 | 482 | 51 | 1421 | GATTCTAAGTTTTGCAAGCTTTGGTTTTCTTGCCTCCGGCCTTTCACTTCATTTGTTCTI | 39880 | A_95_P259281 AB300776     |
| 40946 | 482 | 61 | 1538 | CAAAGTAAATATGGATAGTTGAATCAAACCTTTGGTTTCCAGTTAATGTTTATGAGC    | 39899 | A_95_P143907 TA14706_4097 |
| 40951 | 482 | 66 | 752  | ATAGTGAAGTACTATCGTGCAAAGCAGCTTCAGAGGGATCAAAGACTGTTGCGGG`     | 39909 | A_95_P199782 EH622406     |
| 40952 | 482 | 67 | 559  | CGTCGAAGGTGCGCACAGACCTATTTGTATTTATGTTTGAATTTATGACAAAATTGT    | 39911 | A_95_P153382 EB683672     |
| 40953 | 482 | 68 | 451  | GTCGTTCAAGCGTAATAAGTGGTTTCTCTTAAGTTGGAGTTTTGGGATAAACCTATA    | 39913 | A_95_P006131 BP530922     |

|       |     |    |      |                                                              |       |              |              |
|-------|-----|----|------|--------------------------------------------------------------|-------|--------------|--------------|
| 40956 | 482 | 71 | 765  | CTTAGTAGAGGGCAAATTTCTCATGTAGATATTTCCGGAAGCTATATGGAATATTTGCT  | 39919 | A_95_P154107 | EB684261     |
| 40961 | 482 | 76 | 1137 | CTTGTCATAGTTTGGTTCTATATATTCGGACTTCCTCAACCAGTGATCTTATTGTTTATC | 39929 | A_95_P189972 | AF113545     |
| 40964 | 482 | 79 | 863  | ATAAGTGTAGCCATCAGAGATATTGAAAAGGGAGCTTTTCCCAAATGTTGCTTGTTG    | 39935 | A_95_P285798 | DV161389     |
| 40967 | 482 | 82 | 224  | ATGTATGACTATGAACTTGTATTTTCGTCTGGGAATGGCAAAGTACTGAGTAAATGG    | 39941 | A_95_P104132 | CV016863     |
| 40975 | 483 | 5  | 187  | ACATGATCTACCAAGCTTCTATTTGGGGAATCCATGGGTGGAGCTATAGCTTTGAA     | 39956 | A_95_P087698 | EB428319     |
| 40977 | 483 | 7  | 831  | AGGGATTATTTCCGGTATTTGAATTCAGAATGCAATAACATGGGTATCTACTACTTC    | 39960 | A_95_P125822 | EB424909     |
| 40981 | 483 | 11 | 229  | TTAGCATCAGTTTCACCTTTCTTATTTTAACTATGGGCATATGCTTATTTGCCAGTCAG  | 39968 | A_95_P111717 | CV020345     |
| 40982 | 483 | 12 | 728  | AGATCTATACAGTTCTGATATGGTGCAGGTCCTGGCATTCTTAGTCGGTTGTCAATTC   | 39970 | A_95_P252164 | EH618097     |
| 40984 | 483 | 14 | 501  | TATAAGTGTCCGATTTTGGACCTCAACCAAAGAAAAGAGAAAAGACAAGAGTGGG      | 39974 | A_95_P111187 | CV020089     |
| 40986 | 483 | 16 | 430  | GAGCAGGCCATGAAGAGAGATGTCAGGATGAAATACTTTCTGTAACTACTTTTTTG     | 14301 | A_95_P000096 | EH619820     |
| 40988 | 483 | 18 | 432  | ACTTTCAAAGTTACCCACATTGTAGTTCCTTTCTCCTTACAGTAGACTATTTTCTTGCA  | 39981 | A_95_P213182 | TA19994_4097 |
| 40989 | 483 | 19 | 353  | GTTGTTCCGATGTCTACAATTCTTACGTCCCTCCGATAGGAGGATTATAATTAATTAT   | 39983 | A_95_P209382 | EB428350     |
| 40994 | 483 | 24 | 2788 | GTTCTATCCCCTCCCTCCCTTCTGAAAAGAGATAGGAAAAAATTTCTATTATTTTTAAA  | 39991 | A_95_P007291 | AF115482     |
| 40997 | 483 | 27 | 694  | TGACTCTTGCTCAAAGTGATGTCTATACTAATAGGTTAATCAAACCTTATTGCCTAGCC  | 39997 | A_95_P126002 | EB425203     |
| 40999 | 483 | 29 | 856  | GGACTTGTTGAAGTTCATCTTGAGAGGCTTCAGGTAAGTGACACTGGTCTTGCTGCT    | 40001 | A_95_P223367 | TA22237_4097 |
| 41002 | 483 | 32 | 847  | ATCTGACCTGATGACTGCTATGTACTGCTCATATGCTAGATTCTTGTTGGGATGCTGAG  | 40007 | A_95_P242322 | FG162154     |
| 41006 | 483 | 36 | 761  | TTCAATTATGGGTATCTCGCTCTACTGCTATGCTGCACCACATATTTTTACACCTTTGC  | 40015 | A_95_P259581 | EB449659     |
| 41010 | 483 | 40 | 596  | GCTTGTTGGAATCATGTTTCCGGGTGTAACAAAGATAACTGCTTAGTGACTTTAATTTA  | 40023 | A_95_P026091 | TA15357_4097 |
| 41011 | 483 | 41 | 1498 | GTACAGGCATGCTATATGGTGTGCAAGTATTCTATTGTGAAACAGCAAATTAATGATG   | 40025 | A_95_P206977 | TA18639_4097 |
| 41013 | 483 | 43 | 796  | ATATACAGCGGGTTAGCCAGGAGATTTTCTGGAAAGATGCTATTGGAGGCTGCCAAC    | 40029 | A_95_P120877 | DW000845     |
| 41016 | 483 | 46 | 585  | TGATACTGAGAATAATAAGCTGCCCATGCTGCTGCATTAGCATCTGCTGCTGCTTTAC   | 40035 | A_95_P315883 | FG189354     |
| 41028 | 483 | 58 | 360  | CCTTTATTGTCCGTCCTCCCTACTGCTCTATATGTGTGTGTGTGTGTATTCTGTGGATG  | 40058 | A_95_P049316 | BP132133     |
| 41031 | 483 | 61 | 2838 | GGTCTTTGCAAGTCTTCATAACAAGTGTATAGTTTTTGCAACTTTATCACCTGCTAAAT  | 40064 | A_95_P019156 | AB032535     |
| 41034 | 483 | 64 | 269  | AACAAATAAGATCTTAGTTACTCAGAGATGGATGGGTGTCAGCCTTTAATGGCTAAG    | 40070 | A_95_P103317 | CV016457     |
| 41042 | 483 | 72 | 480  | CATTAGTAGACTTGACATTCGCGTTGGTCTCATAACGAAGGCACAAAAACATCCTAA    | 40086 | A_95_P074855 | BP526578     |
| 41044 | 483 | 74 | 1298 | CTGGATAGTGATTTAGAGCTTTCTGTAGCTTCTCCAATTTGTGTATGTAAGTAAAA     | 40090 | A_95_P205357 | TA18266_4097 |
| 41047 | 483 | 77 | 800  | CTTTGTATAGAATGGAAGTACCTAGTAGAGTATGTCGTTCACTGTAGTTTAACTTT     | 40096 | A_95_P021116 | EB438023     |
| 41050 | 483 | 80 | 807  | TGCCAAAGGTGAAGCTAGAGGTATGGCTATAAAAAGCAAGAATAGCTGCTTACAAGA    | 40102 | A_95_P120827 | DW000794     |
| 41054 | 483 | 84 | 646  | CCCCACGGTGGGCGCCAAACTATTTACATTGAAATATGAGTAACAATTAACCTTATA    | 40110 | A_95_P118402 | DV161455     |
| 41055 | 483 | 85 | 741  | GTTCTTTTATATGCGCCTTGCACTTCTCTCTATCTGTGATGGGCAATAATTTGATGTAT  | 40111 | A_95_P198237 | TA16734_4097 |
| 41056 | 484 | 1  | 506  | TGAATTTGAAGTTGGGCCTAACTAATTGTCAGCCTAACAACAGAGTCCATACCCTCAC   | 39949 | A_95_P112172 | CV020555     |
| 41057 | 484 | 2  | 859  | GTGTATACGAAAGACTGCTTCAGATGTAATATTGGGATGATTTCTGCCAGCTTGACCT   | 39951 | A_95_P216642 | TA20750_4097 |
| 41060 | 484 | 5  | 1580 | GTCCTACTGTTGAACTTTTATGTGGTTAAGGGTGGACTGCTTTCTATATGAACTATT    | 39957 | A_95_P012796 | X77763       |
| 41062 | 484 | 7  | 498  | GTCTGTCCTTCGGCGTCTGTTTCACTATATACATAAATTGAAAATTTTACCCGTTTGC   | 39961 | A_95_P194832 | TA15985_4097 |

|       |     |    |      |                                                              |       |              |              |
|-------|-----|----|------|--------------------------------------------------------------|-------|--------------|--------------|
| 41064 | 484 | 9  | 214  | TGAGCTCTGTTAAATGATCGCATAGAATTGAAGCGACTAAGTACAGCATGTTTGATA`   | 39965 | A_95_P154787 | EG649759     |
| 41069 | 484 | 14 | 521  | ACCCATTGTTCTGGGGTTGTGATTTAGCCATGAATATTGTTGTTTGATATTAGCTTGA(  | 39975 | A_95_P308783 | FG643588     |
| 41071 | 484 | 16 | 417  | AGAGTATGTAAACCATGAAACTAGGCAAGGGACTTTTAGCCACCAGATTCTGGTTAT.   | 39978 | A_95_P093673 | BP532365     |
| 41075 | 484 | 20 | 490  | GGATTTCAAGAAACATTTAGAAACAGATCACAGACTTGGTTAACATTCAAGTGCTTAC   | 39985 | A_95_P122547 | DW002533     |
| 41088 | 484 | 33 | 636  | GAGTCCAATTATACTGTAACTTTTGACTCTCCCGATTCATTTCTACTTTTAAGGTATTC( | 40010 | A_95_P207547 | BP129575     |
| 41089 | 484 | 34 | 868  | GTTTCTAAAGTTGAGATGGCTAATTATAATCCGATCAAGTTGGAGTTTTTGCCTCTCA`  | 40012 | A_95_P127887 | EB427450     |
| 41095 | 484 | 40 | 220  | GTATTCCGCCTCCACAGAAACTAAGTGTAGTATGGAGGTTTTCTTCATTTTACGTTCC/  | 40024 | A_95_P063920 | BP135907     |
| 41096 | 484 | 41 | 185  | ATAAGAAACGCGTCGATTCTAAGCAAAAGCGTGCCGTTTCCTCTCCGTTAAAGCAA/    | 40026 | A_95_P201292 | FG136640     |
| 41101 | 484 | 46 | 324  | GACTTATAAATGTGAACAACTACATCGAGTATGTAAGGAGTAAGGATCTCCGAGTT     | 40036 | A_95_P131707 | EB432091     |
| 41102 | 484 | 47 | 801  | CTCTACATCTTTGACATGTTGGTTGGTTCTTTTGGGATTATATCCTTATAACGCCCT(   | 40038 | A_95_P020011 | EB428986     |
| 41104 | 484 | 49 | 813  | TCGTTTCTTAGTTAAAGTTATGCTTATGAAACTGATGAGCTACAGGTCAAGTTCATCA   | 40042 | A_95_P266841 | EB451993     |
| 41105 | 484 | 50 | 2129 | GATCGTGATAATTATGGATTTGTTCTTAGAATTGCTATTAGCGTGCTGTCTTGGTGT`   | 40044 | A_95_P009436 | Z28373       |
| 41107 | 484 | 52 | 605  | TCACTTCTAAGGATAGGGTCTTGGGAATATGCATCTAGATATGAAGGTGATTTGGTG    | 40048 | A_95_P127677 | FG162856     |
| 41108 | 484 | 53 | 908  | ATGATGAACAGTGCATGTATAGCTTGTGCATGCTGGAACTGGCTGTACTGCCGAAAG    | 40050 | A_95_P008706 | TA14965_4097 |
| 41113 | 484 | 58 | 774  | GCAGGTTAATTTGAGGACACATGCAAAGGTTTTTLAGAGTTGCAAAGGAAGCTG(      | 40059 | A_95_P262771 | EB442083     |
| 41114 | 484 | 59 | 521  | ATGTTGAAGGGAATGTTCTGCAACATTTGGACACCCCTTTTGGTCTTTGTTATGTGA`   | 40061 | A_95_P134487 | FG641157     |
| 41117 | 484 | 62 | 447  | GTGTTCTAGAAGAACGAATATTGAGGTGTATCCATTTTATGAAGAAGTTTGTCTTCTC   | 40067 | A_95_P002151 | EH620847     |
| 41118 | 484 | 63 | 479  | GTCATACACAGACTAATAGGATGTAGTGGAAAGATTGTCACGACTTGATTTTGCTTTTA  | 40069 | A_95_P140287 | EB444249     |
| 41120 | 484 | 65 | 842  | ACGACTTCCAAAATTTGCTACCCTTTGCAAATTCAGTATGAAACTGGTCTTTCAGAAT(  | 40073 | A_95_P190357 | TA14998_4097 |
| 41123 | 484 | 68 | 189  | GACTGTTGAAACTGCTCTCTTGAGCCAAATGGTTGTTGTTTATTGATGAGTATTT/     | 40079 | A_95_P204867 | TA18158_4097 |
| 41125 | 484 | 70 | 712  | GCATTTCTTCAATATCCCATTGAGCTCCTGCTTTGTTTGATAATAATATCCTTCCACAA` | 40083 | A_95_P315608 | FG197573     |
| 41128 | 484 | 73 | 464  | ATAATATTGCGGGGCGTAACATCATTCCCCCTTTGGAACATTCGTCCTTGAATGTTG.   | 40089 | A_95_P034993 | BP128316     |
| 41132 | 484 | 77 | 836  | CGCTTTGATATGTGTGTTGGACCGGATAAAGAGGACGGATACTATATATGAATAATA    | 40097 | A_95_P251147 | EB424811     |
| 41137 | 484 | 82 | 630  | GATGCAAAAGTGTCTTACGGTTACTTTCTCCACATAAATAGATTTTGTCCATCTTCTCT( | 40107 | A_95_P134087 | EB435916     |
| 41141 | 485 | 1  | 660  | TTAAGGGGTTGCTTTCAACTAGATGTTATTCTCTGTTTCTTTTCTTTGCTCTGCTAA/   | 40113 | A_95_P186027 | TA14039_4097 |
| 41146 | 485 | 6  | 869  | AGTGTATTAACATGGTTCTCCACATGACGGAGTCGTTCCGTTGAAAAGTATAGC`      | 40123 | A_95_P231549 | DW003993     |
| 41148 | 485 | 8  | 758  | GGAACAGTTGATCGCTTGTGTTTGTGAAGAATATTTGGGTACAACGATGTCATTTTGAA/ | 40127 | A_95_P229679 | DV159989     |
| 41153 | 485 | 13 | 875  | GGAGATATGATTCCGCTAATGTGTTTTGAGAGGTACTTTCACTGATTAATTGAAGGAA(  | 40136 | A_95_P153812 | EB443735     |
| 41154 | 485 | 14 | 225  | AAGACAATAACAATGCTTTGACTGTGAGAGCTGGCGGTTACCGTTGAGACTAATG      | 40138 | A_95_P111337 | EB679494     |
| 41157 | 485 | 17 | 498  | GTCTTCAAGGGTTCCTTGGTATTCAAATGCTGATAGGATGGTGGTAACTGGTTCAGG`   | 40144 | A_95_P111092 | CV020051     |
| 41163 | 485 | 23 | 990  | CTGAACAATGTGTGCACACAAATAATATTAACCGCTGTTTGGCTTTGGGCTTATC      | 40155 | A_95_P027681 | TA15280_4097 |
| 41166 | 485 | 26 | 795  | AACTTCCATGAATCTGTGCACCTTGATAGTTTTGATGTGGACAGGACCCTGACTCTGC   | 40161 | A_95_P011746 | TA16057_4097 |
| 41167 | 485 | 27 | 776  | CTTGCAGGAGTAGGTAGTATTAGTTTATTGTTTGGGATTGACAATTGATGTTTC       | 40163 | A_95_P200307 | EH613966     |
| 41170 | 485 | 30 | 1088 | AAGAATAGCTGTATAAATGAAGGGCGGGTAGAATAAATGTGTTGGTACACATTTGT(    | 40169 | A_95_P021141 | TA19071_4097 |

|       |     |    |      |                                                              |       |              |              |
|-------|-----|----|------|--------------------------------------------------------------|-------|--------------|--------------|
| 41171 | 485 | 31 | 345  | AGAGGACAAGTGCCAAATGGTGTTCCTCAACTCAATCATCGCAATGTGGGAGGTCA/    | 40171 | A_95_P033869 | FG145583     |
| 41172 | 485 | 32 | 256  | GACCATTTTGTGGATTAGGAGGTGCAGTTAGCCAGTTAATACTCCTAGATAGATG(     | 40173 | A_95_P154722 | EG649733     |
| 41177 | 485 | 37 | 472  | CTTTGTTAGACAAACACCCGTGAAGATAAAAAGTACCCTACTGTTACTGTTTTGGCG    | 40183 | A_95_P025141 | TA19964_4097 |
| 41178 | 485 | 38 | 333  | TGTAACATAGATGTGCTACTGTTGAATCTAAACAACTAGCTTCTTGCCTTTTGTCTG(   | 40185 | A_95_P029876 | TA13556_4097 |
| 41182 | 485 | 42 | 183  | CCAAGGGAACTTTATCCCATCCTCTGGTATCAAAGAATTAAGACTTTTTTGTATGT(    | 40193 | A_95_P142872 | EB446286     |
| 41185 | 485 | 45 | 642  | GAGGGGAATCCGAAGATGAGTGATTTTATGTAACTTTGAATGTTACATTTTGGTG      | 40199 | A_95_P121492 | DW001579     |
| 41188 | 485 | 48 | 439  | GTATCGAGATGTAAAGGAGAGTTCTTTGGATGCTAAACCTAGGGATGGTCTTGGTTT    | 40205 | A_95_P040791 | BP129923     |
| 41203 | 485 | 63 | 1705 | CTACTTCCTATTTTCAGGGAATTTGATATACGTCATCAGCCAAATTTCAACTGATTG    | 40235 | A_95_P181462 | TA12987_4097 |
| 41205 | 485 | 65 | 347  | GATGGAATATTGTCGGATCTTCATCACCGATCTAACTCCTCATCTCTAACTTTGTCT(   | 40239 | A_95_P103212 | CV016396     |
| 41206 | 485 | 66 | 512  | CATTAATAGCTCTAATTCTGAAATATGTGTGCATATGCTTATCGTCAGCTTCCCTTGT(  | 40241 | A_95_P035413 | BP128466     |
| 41207 | 485 | 67 | 744  | ATCGATGATGCATTAACACAGCTTCAAGAGCAAAGCAAGGAAAGTTGGGAACTGT(     | 40243 | A_95_P151017 | EB681225     |
| 41211 | 485 | 71 | 628  | TCTTCCCTCAATAAGCTGTGCTTCTGCCGGTGGATTTTGGAGGAAAGACAAAGATG.    | 40251 | A_95_P003526 | EH613915     |
| 41212 | 485 | 72 | 1613 | ATAGATACCACGAGCCTAACTCGTGGCGGTTGAGTAAAAGGAGAGCTTGATCTTTTT    | 40253 | A_95_P017996 | TC53168      |
| 41216 | 485 | 76 | 9    | CGCCATAGATAAGTTAAACGGTATGCTCATGAATGATAAGCAAGTATATGTTGGGCA    | 40261 | A_95_P115677 | AF190657     |
| 41217 | 485 | 77 | 641  | GCAGTGGATCTAACAGTTAAGATAACTGGGAATCTAACAAATAGATGTATTCGTCAAG   | 40263 | A_95_P139962 | EB443904     |
| 41225 | 485 | 85 | 264  | ATGAATTGTACCCTATGTCACCTGTTCTGAAATCTGAATCAACTGTTGCAGTTTTAATC  | 40279 | A_95_P143417 | EB446723     |
| 41226 | 486 | 1  | 343  | AACCCCTACCTTAGAAGGTCTTGATTTACTTCAAGCTAAGAAAAAGCGCGCCTA/      | 40114 | A_95_P158532 | FG164661     |
| 41234 | 486 | 9  | 351  | GTGTAACCTGAATTGAGGGATGCCCTCTCTATTTTTATTGCACTGTGTTAATTCTGC    | 40130 | A_95_P219702 | TA21451_4097 |
| 41243 | 486 | 18 | 505  | CTTTGTAACCTGCAAGTGATGGAAGGAAGTTTGGAGAAATTCACTGGGGAGTATCAGI   | 40146 | A_95_P079470 | BP527773     |
| 41251 | 486 | 26 | 999  | CGATGATGTTGCTACTCTCTCCAGCTAAATAAGATAAAGACTTGATTCTTTTTTCC     | 40162 | A_95_P017821 | TA11931_4097 |
| 41254 | 486 | 29 | 768  | TACTTGCAAGACTGAATTTTTCTTTGGCCTTTCTATGGGATTGATAAACTGTTTCCTG   | 40168 | A_95_P204392 | DW002350     |
| 41256 | 486 | 31 | 670  | TTGCCTATCTCGAGGAAAATAGTGGTAAAAGTGGTCCAGTATTCTCCTGGTCGAAAG    | 40172 | A_95_P311938 | FG151562     |
| 41259 | 486 | 34 | 1966 | ACACCTTTTGTATTGTTTGGCTTTAATTTATTAGTGTGCTCTCGTGCACCTCTCTCCTAC | 40178 | A_95_P020586 | D26602       |
| 41271 | 486 | 46 | 866  | GATGGAGGGATTTTTGTGCTTGTTAAGGAAGGGAGTTCTCTCTATATTAGTAGAGA     | 40202 | A_95_P272291 | EB449818     |
| 41272 | 486 | 47 | 306  | CTGATTTGTTGTTCTCTGTGTTTGATTGAAAGGAGTTGATTGCTGGATGATCTTATT(   | 40204 | A_95_P069970 | BP192486     |
| 41274 | 486 | 49 | 670  | GGCTATGTACACTTGCATAATGCATACAATTGTGCACTTGTTGGAATTTTCTTTAGTC/  | 40208 | A_95_P119857 | DV999465     |
| 41275 | 486 | 50 | 297  | TGAAACCTGAGATGAATACAGAATCAAAGGTGCATATTGCTTGTTCCGTAGGCATA     | 40210 | A_95_P088703 | BP530184     |
| 41278 | 486 | 53 | 695  | ATCAGAGGAAACATAAAAAGGGGTTGTTGGTAGCTGGCCTGGGATCATGAATTGTCT(   | 40216 | A_95_P301848 | FG639980     |
| 41282 | 486 | 57 | 1153 | TTCTATCTAAAAGGAGTGAGAAGAAGGTAGGGTATCCTACCCATCTCTCACCAGTAT    | 40224 | A_95_P121427 | TA12896_4097 |
| 41283 | 486 | 58 | 1559 | TCTTATGTGAAGGCAACCAAAATTTCTTTGCGCTGTGTTTATTTTGAAGGGATACTTG   | 40226 | A_95_P194782 | TA15973_4097 |
| 41285 | 486 | 60 | 203  | CGAGCAATCTTGTTGAGAGTGTCTTAATGACTTTGTATTTCTAATGAGCAATTCGT(    | 40230 | A_95_P133317 | EB434718     |
| 41292 | 486 | 67 | 1590 | CAACTTCTGTTTTCTGATTTGGAGAAAATTAATGGGTGGAGCTTTTGCATGGGTTAA/   | 40244 | A_95_P238409 | AJ344537     |
| 41293 | 486 | 68 | 784  | GCGTGCTAGCTTTATATAAGTCATGGAACACACTGTCTCGCCTGGTTGATATCTGAA/   | 40246 | A_95_P012696 | TA13030_4097 |
| 41294 | 486 | 69 | 0    | ATCATGGACTTTTTCTCAGATCATCTGTGAGTAACACTATGCTGTGGAGCTGGCATGA   | 40248 | A_95_P296713 | A_95_P296713 |



|       |     |    |      |                                                             |       |                           |
|-------|-----|----|------|-------------------------------------------------------------|-------|---------------------------|
| 41295 | 486 | 70 | 793  | CATGGAAATGAAAGGATCCAATTATCAGCATCTGCTATTCTTGTGTTGAGTTAATTTCT | 40250 | A_95_P009151 TA11962_4097 |
| 41296 | 486 | 71 | 765  | GTATCCAATATTATGAATCTGTCATTGGAGAAGTCGCAAGCTCACTGGAAGGGGCGA   | 40252 | A_95_P150687 EB680821     |
| 41302 | 486 | 77 | 770  | GGTGTAAACACGAATATACTGCAACGAATCCGATTATCGGTTTTCAATAATGAAATC   | 40264 | A_95_P246602 EB677971     |
| 41303 | 486 | 78 | 937  | GAATTCAAATTCTGAGGTTGTTATCCTTTCCAGTTCATCTATTTTGCGAAGGCTTAA   | 40266 | A_95_P192372 TA15437_4097 |
| 41304 | 486 | 79 | 482  | ATAAGGAGAACTATGCGGCCTGGAGATGCTTTGTGGAGCATCTCATCGGATTTTCAT   | 40268 | A_95_P277968 AM789925     |
| 41308 | 486 | 83 | 283  | CTTCTCGAGTACTGATGTGACTGATGTTCTAACAGTATCAACGAGTTCTGTGATATT   | 40276 | A_95_P095783 BP533340     |
| 41310 | 486 | 85 | 658  | TTGGTCATTGAACCTCTCCCTCCTGCTTGGCTACCCATTGGATATCTTTATTCTTCTTA | 40280 | A_95_P040126 BP129741     |
| 41312 | 487 | 2  | 819  | AACACCATGGATATTGCACATGACGAGCTGGCTTACTATGCTGGGATGCTAGTATG    | 40283 | A_95_P294528 FG139458     |
| 41313 | 487 | 3  | 355  | AACTGGAGGCACAACCTCTGAATCTTCTCCCTTTGTTAATGGACATATTTAGTATG    | 40285 | A_95_P108417 EH623004     |
| 41315 | 487 | 5  | 864  | TTTTGGTGCATGCTCTCAGTGCCTCTTCTTGTCAATATCAAAGTGTGCAAGTAAG     | 40289 | A_95_P304038 FG167416     |
| 41317 | 487 | 7  | 446  | CTTGTCGGCTGGTTTTGTTGTATAGTCTTTCATGGTAGCGTGGTAGCTCGTACCTTA   | 40293 | A_95_P126617 TA15684_4097 |
| 41320 | 487 | 10 | 707  | TAATACTGGGAATGGTGTCCCAACCAATGTTGCAGATGCCAAACATTCGGCAATCTA   | 40299 | A_95_P216707 FG159163     |
| 41333 | 487 | 23 | 639  | ACACTAGGAATTAAGGCCACATGCTGTAGCACTCTCATTCTTATCCGCATGTGTGTT   | 40324 | A_95_P303538 FG638377     |
| 41335 | 487 | 25 | 858  | AATAGCATTTCAACTACAAATGTGCGACCGCAGGGTGCTTAGTTTCTCCACTCAGCTGA | 40328 | A_95_P195607 EB438394     |
| 41340 | 487 | 30 | 874  | CTGCTGAGTTGTGTAACCTTAAGACATGTCTGTATGTGGTGTGTTTATAATGTATAA   | 40338 | A_95_P010146 DV999957     |
| 41343 | 487 | 33 | 49   | TAGGCAATCCCCATCAGATTCGATCATAGCCATAAACAAATTGAGTGAAAAAATAAA   | 40344 | A_95_P031846 BP535438     |
| 41345 | 487 | 35 | 850  | GCTCTTAGCTGAGGCTGATATTAGCTAGCAAGCTTCTATGCACCTATTTACTGGACT   | 40348 | A_95_P008421 TA15150_4097 |
| 41346 | 487 | 36 | 837  | TGACAATAATTTGATGTGCTTGTGCTCCAGAATGTTCCGGGAGCTTGCTTTTGGGA    | 40350 | A_95_P246362 DV158308     |
| 41348 | 487 | 38 | 495  | ACAGATTTGCTTGGGACACTTCTCCCGAAACAGTTGCAAAGATCAGAAATGAAAAG    | 40354 | A_95_P029821 EH663694     |
| 41349 | 487 | 39 | 181  | GAAATGATATCCCTTGCTTTTGCATAAATTTTGGCATAATCCAGTTGTGTGTTGTCT   | 40356 | A_95_P079305 BP527730     |
| 41352 | 487 | 42 | 731  | AAATTAGGGTATGTAAAAATGCAGTATGGTGTATGTGGAGGGCGCGAAAAAGGCGT    | 40362 | A_95_P023716 EB439602     |
| 41355 | 487 | 45 | 164  | ATTGTTCTGCTGCATGATCGCCTGCTAGAAGCAGTCAAGTTTCTTGATCTAGGTGATG  | 40368 | A_95_P050141 FG623870     |
| 41362 | 487 | 52 | 438  | GGTCTTATAGTGAAGAGGTATTTATCAATGTATGAGGACGATTTTAAGTCATCTTGAC  | 40382 | A_95_P221112 TA21752_4097 |
| 41364 | 487 | 54 | 2235 | GCCATTTTTTGAGAATGGCAGTTCAATGTAGGGTATAATTTATTGGCTTTTTGGTTT   | 40386 | A_95_P034718 AY519499     |
| 41365 | 487 | 55 | 573  | CAAAAGGGGATGCTGTTAGCACTTGTCTTTGAAAAAGGTGATTTCATAGACTTGAA    | 40388 | A_95_P021881 FG634262     |
| 41370 | 487 | 60 | 574  | GATATCCAACTTTTTCTCTTAAATCTCCTGGGACCTTTTCTGCAACTCAAACATATG   | 40398 | A_95_P290923 DW001932     |
| 41377 | 487 | 67 | 866  | CTCAGCCAGAGTTTGTGAGCTTCAGAAGTTTGGAAAGTCACATATGTCACTATAATAAC | 40411 | A_95_P265016 EB678047     |
| 41384 | 487 | 74 | 838  | CATCATCGTCTACTCTGTTGGATGTTGTGCTTCAGAAACACCAGGCGTGACAATTCT   | 40424 | A_95_P126277 EB425538     |
| 41387 | 487 | 77 | 726  | ATGTCTCCTGTACTGCAATATGATATTCTCCTCTCCTTCATAATAAGAGCGTGTCTTG  | 40429 | A_95_P022001 DV158073     |
| 41388 | 487 | 78 | 91   | TTCATTTTCACTGTTCTTGAGCCGAGTGTCTTTTGGAAACCTCTCTACCTCCCTACCTC | 40431 | A_95_P034608 AJ937840     |
| 41390 | 487 | 80 | 0    | CTCGCTTTTGGTGTACTCGTTAAAGTTTATCAATGCCCAAACAAAAAGTTGGCGAGC   | 40435 | A_95_P231244 A_95_P231244 |
| 41398 | 488 | 3  | 635  | TTCTCAACTGTTTGAAGCCCCGTTGGATGTTGACATTAAGGGTGGTGGAAAGGTT     | 40286 | A_95_P160882 FG146492     |
| 41402 | 488 | 7  | 1943 | GCCAAATGTGTACACGAGTTTGTGAGTTTAAATAGTTTATTGAGATCCAAAATTAGTT  | 40294 | A_95_P030136 TA15301_4097 |
| 41405 | 488 | 10 | 666  | ACCAGGTATGAGGGATTTTACGGCCCTGCAAGGACTGTTGCAACATTTAGCTTATCTC  | 40300 | A_95_P129207 EB428925     |

|       |     |    |      |                                                              |       |                           |
|-------|-----|----|------|--------------------------------------------------------------|-------|---------------------------|
| 41406 | 488 | 11 | 1782 | CCCAAAGTGGAGCCGAAATGTTGAAAAATTGCAAATGTTTATTTATTTCTCCCTCATG   | 40301 | A_95_P016106 TA13404_4097 |
| 41407 | 488 | 12 | 1142 | ATGACGTTATTCTTTGGTTAATAATGACGGCCCTATTGCGCTGTCCAAAAGTAGAGTG   | 40303 | A_95_P237959 AF098636     |
| 41411 | 488 | 16 | 408  | CACTAAGAATGCTGTTCTTTTCGTGATTTTGGTCACTCGGTCATCTTGGGACTCTCCTA  | 40311 | A_95_P088248 BP529995     |
| 41412 | 488 | 17 | 526  | ACTCAGTAAAGTCGTTTCGTATCTTTGGCTGTTTTCTCAGGTGTAGCTGTAATTCAAA/  | 40313 | A_95_P141452 EB445175     |
| 41413 | 488 | 18 | 526  | ATTGTAGTAATGACGCTGGTTGATACAACCTTCACAAGTTTTTACCATATTTATGCTG   | 40315 | A_95_P033564 AJ632843     |
| 41415 | 488 | 20 | 600  | GCGTGTGAATTCCGGTACATGTGATGTTTGTGTTACATACAAAGTTTATCTAGTAAA    | 40319 | A_95_P039571 BP129587     |
| 41418 | 488 | 23 | 555  | TTAAACTAGAAATGTTGGAGAAAGAAGTTCCTTGGTCGCTGCATCATGTGGGCTCTT    | 40325 | A_95_P051806 BP132745     |
| 41424 | 488 | 29 | 530  | CCAACGGTAGTGTCTCATGATCAGAATGCACCCCAAATATTCAACATCAATTTGGAC    | 40337 | A_95_P275738 AM782816     |
| 41429 | 488 | 34 | 411  | TTACTGCTTCAGCTCCTTATCAGCCTCTTGGATTTGGTACTACTGGTGGTAAGCAAAT   | 40347 | A_95_P150222 EB426566     |
| 41431 | 488 | 36 | 261  | TAAGCTCTTGATAGTTGGTCAATCTGTCAATTGGATCAAACATAGTCATTTTGTAA     | 40351 | A_95_P089753 BP530639     |
| 41433 | 488 | 38 | 381  | GGAATCTGTGAATAGAAGGTGGAATGGTGGATGTGGTGTATTTGATTAGACATTT      | 40355 | A_95_P094828 BP532890     |
| 41435 | 488 | 40 | 547  | GATTCTTGTTGATTTCTCTTTCTTGTGTAATGCAGTAGCTTATGCTTGTATAGTGG     | 40359 | A_95_P003126 TA12166_4097 |
| 41441 | 488 | 46 | 713  | CTATAGAACGTGTGCTTTCCCTTATCTTCTTAAACATTTAAACTCTGCCTCTGTCTTAGC | 40371 | A_95_P180547 DV160233     |
| 41442 | 488 | 47 | 1266 | GGTCCAGTGTGGATGGAAACCTCCATTTGTGCAATTGAATAATTTGAGTTTAAATTTT   | 40373 | A_95_P011586 TA14882_4097 |
| 41452 | 488 | 57 | 482  | CACGATTAGTTTGTGGTGTACCTGCAGATTTGCGTTGTTAGTTTAAATTTTGTTTAC    | 40393 | A_95_P187842 EB678761     |
| 41453 | 488 | 58 | 213  | CAAAGACTCCAGCTTTTTCGTAGTTGGTACTGTACAAATAGATATTGTATATCTGT     | 40395 | A_95_P096323 BP533575     |
| 41454 | 488 | 59 | 864  | ATATGAGCTGTTATACACGGGAAAAGTTGCACTTGAATGTGGCAATGGAGTATTATAG   | 40397 | A_95_P217287 TA20900_4097 |
| 41455 | 488 | 60 | 905  | GCCTCTTGTTCAAGGTAGCCTTAGATTTATAAAAGCTCTGTTTATGTATTATTCAAAC/  | 40399 | A_95_P139412 EB443156     |
| 41456 | 488 | 61 | 481  | GTTGGGGTTTCGGATGTTAATGGTTACAACAGACAGTAAAAAAGAGAAGTTATATTT    | 40401 | A_95_P143292 EB446641     |
| 41464 | 488 | 69 | 242  | CTTTGCGAGCATCATTTCCATCTGAGAGTTTCTTCACTTGTACATTCAAATGTAATATT  | 40416 | A_95_P131262 EB431415     |
| 41465 | 488 | 70 | 874  | CGTATATTTACATGGGCAGCAGTTGGACTCACAATTGCTATACTTGTACTTCTGTAA/   | 40418 | A_95_P194902 EB426141     |
| 41468 | 488 | 73 | 835  | AAACATTGGCTTGGTACAAGCGGAACTAAGGTCCATAGCAATGTTCAATCTTCAAAC    | 40423 | A_95_P183087 TA13376_4097 |
| 41470 | 488 | 75 | 879  | GTCCCTTTCTGCAAAACACTATGATATGGGGAAGTATTGTGTCTATGGCGCGGCTATA/  | 40426 | A_95_P201992 EB432490     |
| 41474 | 488 | 79 | 632  | TAATGTGAAACATCCACGAAAAGAGTCGATGGATGGATGGAAATAGAAATGGGATT     | 40434 | A_95_P157027 EH615077     |
| 41476 | 488 | 81 | 835  | TTGGAAGCGGTACATATTGCAGCGAATAAGAACAAGTTCCTGGAGATGTATCTGCC     | 40438 | A_95_P246752 DV999084     |
| 41480 | 488 | 85 | 3027 | GCGATTGTGTATATAAAGGAAGAGTAGTGACGAGTTATACTTGTAAAGGCATTTTGA    | 40446 | A_95_P134537 AB095098     |
| 41481 | 489 | 1  | 1424 | CAGTTTACGTGCTATGTAATGATAGACTTGGTGTCAATTGTGCTTATATTCCTCTAGG   | 40447 | A_95_P180982 TA12869_4097 |
| 41483 | 489 | 3  | 515  | ACAATCAGGTATGCTTCAAGTCCGTGTATAATTTTCAATTTAGGCTTCGCTCTTGGTTG/ | 40451 | A_95_P043406 BP130608     |
| 41486 | 489 | 6  | 731  | TACTAATACGAGAAGAGGAATAGAACAGAAGATTCAGATGACTGATTCTTCTTCCAG    | 40457 | A_95_P149857 EB679817     |
| 41487 | 489 | 7  | 687  | ATACATGGGAAGAGCAGTCAGAGATAGATGTGGCTTCAGGATTTTACGTTCTCTTCG    | 40459 | A_95_P287398 FG199342     |
| 41490 | 489 | 10 | 1245 | CATGTAGTGGTGAGAAGTGTGAGGATTTCTGCATTTTCTGTCTTTTAAATTTAGCTTTC  | 40465 | A_95_P030926 TA16714_4097 |
| 41494 | 489 | 14 | 1021 | CCAATAAGTTTCGGCCTTTTGTGTGGAGATGTTTGTAGTAATAACTCCCATCCTTATC   | 40473 | A_95_P187372 TA14332_4097 |
| 41495 | 489 | 15 | 198  | ACAGCACATTGCAGCCTCGCTTTTATGATCGATTAAAAAGGTATGAAAGTGTCCAA     | 40475 | A_95_P134697 EB437371     |
| 41501 | 489 | 21 | 930  | ATAAGACGAGAAGTGTCCAGACATCAATATCGTTGTGCACATGCTCATCGATAGAAT    | 40487 | A_95_P292093 EB426389     |

|       |     |    |      |                                                              |       |                           |
|-------|-----|----|------|--------------------------------------------------------------|-------|---------------------------|
| 41502 | 489 | 22 | 717  | AAGGAATTGACGGTGGAGAAAGCCGTTGAGAATTGGATCCGAAAAGAAGGAGACA/     | 40489 | A_95_P292868 FG194353     |
| 41503 | 489 | 23 | 915  | CTTGGCAACAAAACCTATGCTCTTGTAATTGCTTTGTATTTGTAAATGCAGCTCAAGAC  | 40491 | A_95_P220242 TA21567_4097 |
| 41508 | 489 | 28 | 325  | CTAGATGAAGATTGCCCGTCTATTGCACAGGCCCAACATATTAAGCATTCTGCTTGT    | 40501 | A_95_P099323 BP534885     |
| 41511 | 489 | 31 | 1487 | CGAAACTTTGTGGTTTTGAGTAATGGATCAGTGACCTTATCACCTAAATGATAAAAAAC  | 40507 | A_95_P191667 TA15285_4097 |
| 41513 | 489 | 33 | 811  | ATTGCGAGAGGGAGATATGGCTCTTCTTGATATGGGAGCTGAATACCTCTTTTATGG/   | 40511 | A_95_P128277 EB440534     |
| 41519 | 489 | 39 | 556  | TGCCGTTTTTGACAATAGTAGTTCCAATGCAATAGATCTTGTGTTTGGTATTGAA(     | 40522 | A_95_P177067 TA11869_4097 |
| 41522 | 489 | 42 | 953  | GCTTTCAGGCAAGCAGTATGTAGTTTAGACTTGCTAGACAAATTTTTAGTTTGTGTT    | 40528 | A_95_P007641 AJ012662     |
| 41524 | 489 | 44 | 637  | TGTATGAGTGTACCTTGGCTGTATTTTAACCAAGCTTCCCTTCACTCTTCCATTG`     | 40532 | A_95_P157532 EH615585     |
| 41527 | 489 | 47 | 371  | GGGACTATAGTCGGATTAATTCATTGTATGGTGATTAATTTACAGAGTGACATTGTCC   | 40538 | A_95_P109117 CV019156     |
| 41528 | 489 | 48 | 794  | AATTGTGAATGAAAGCGGTAGTTGTAATTTCTAGGTTATTTTCAATCCCAAATCCC(    | 40540 | A_95_P126207 EB425456     |
| 41529 | 489 | 49 | 724  | GCTCGTAAAATTGAAGAGCACTGCCGAAAATATGAGCGTCTGAGACAAGAGAAGAA     | 40542 | A_95_P014186 TC65246      |
| 41531 | 489 | 51 | 712  | GTACAAGCTGTGAGATCAAGCAGTTGATTCCTAATTTATGATTAAGCATTGGTACG/    | 40546 | A_95_P222612 TA22071_4097 |
| 41532 | 489 | 52 | 1674 | GTGTTACTGTCAGAGTTTGTCCATCCGATTTCTGAATGTTAATAGACTATTTGATTATC  | 40548 | A_95_P014536 X63195       |
| 41535 | 489 | 55 | 828  | GCATTTTTTGGCTATCTCTTTGGTAAATGCTTAAGCGGCGAGAATCCTTTTCTTGAGG`  | 40554 | A_95_P017306 EB680102     |
| 41537 | 489 | 57 | 514  | ATACTATACATTTCTCTCTACCTTCTGTCGACCCTGCAATTAGGCCGTTGATCGGATCAT | 40558 | A_95_P148692 EB678140     |
| 41541 | 489 | 61 | 802  | GAATGATGATGATGTTATGTTTGGTGGAGATATGGAAGGCCATTTCTGGAGATACTAC`  | 40565 | A_95_P246522 DV158084     |
| 41544 | 489 | 64 | 173  | TATTTTATACTCAGATTGGACAGTCTCTTTCACTTCTGCTCAAGGGCGGAACTCGTI    | 40571 | A_95_P092573 BP531866     |
| 41545 | 489 | 65 | 777  | CACTCTATCGTCTGTATATGATATACCAAGTTCTTGATGCTGTTCTTTTATGAATGAT   | 40573 | A_95_P257374 FG144896     |
| 41546 | 489 | 66 | 484  | GACAAAAGAAATATGGTTGCACCCGCTTTTGGTGAAGATCAAAGTGAGGCACAGT`     | 40575 | A_95_P266101 BP532651     |
| 41551 | 489 | 71 | 1210 | TGTCGACTACTTACCTAGGATTGCTCATGATGGATGGACTGGGGATGCCATTCTCTA/   | 40585 | A_95_P209247 TA19148_4097 |
| 41554 | 489 | 74 | 364  | CCCGTAGTTCCTCTAGTATTATTAGCTGATGCTACAAAGTCCCAACAAATTAATATCA/  | 40591 | A_95_P152647 EB682973     |
| 41561 | 489 | 81 | 329  | CTTGTAATAGGTGGATATTCTGTATTAGAGGCTCATATTCGTGACACCGAATTCTATT/  | 40605 | A_95_P094093 BP532557     |
| 41562 | 489 | 82 | 803  | CCATTTCCAGCTAATGCAGGACTTTATGGTTGTCCAACAAGTGCACAAATGTTGAAA    | 40607 | A_95_P014776 TA18567_4097 |
| 41564 | 489 | 84 | 796  | GAAAGAAGGAAGTTCTTACCACAAGATGAAGATCATTGATCGCTGCTTCTCTCGAAG    | 40611 | A_95_P126747 DV162062     |
| 41566 | 490 | 1  | 688  | TTTAGAGGAAGGACTTGCCATGATTGATGATGGTCACAGAGATGGCAGACGTAGAT/    | 40448 | A_95_P143672 EB446908     |
| 41568 | 490 | 3  | 709  | TGCTTTACAGCTCTTTTCGTGTGGTTTGGTTGAGGAGGGTTCTGTACAAGGTAAAGC/   | 40452 | A_95_P136137 EB439760     |
| 41571 | 490 | 6  | 1381 | CCTCAAGTGTCAAATTGTTTCATCAAAGCAAAGTATTGCTTCACTGTTTCAGAAGCTT/  | 40458 | A_95_P007766 TA12022_4097 |
| 41586 | 490 | 21 | 198  | CCCGACATTGACAAACTTCTTTGATATACCAATTTGGATGTAATCGTGGTTTATTCTT/  | 40488 | A_95_P306578 FG635672     |
| 41603 | 490 | 38 | 785  | GTTGCTAAGACCCTTAAAGCAGAATGATTAAGAGTTCTGCTTCATGTAATCCAGTAT    | 40521 | A_95_P015641 EB684169     |
| 41610 | 490 | 45 | 697  | GGAATGAAGCTGATTTTATCAAGGTTAGTGATGATGAGGTAATTTCTGACACAAA      | 40535 | A_95_P128327 EB427949     |
| 41614 | 490 | 49 | 382  | CCCATTTCCGAAAACCATTTCCAGACATAAACACTTGGAAATGCAATTTCTCAATATA/  | 40543 | A_95_P186722 TA14187_4097 |
| 41615 | 490 | 50 | 858  | GTATTTGTTTATTATCTTGTGTCACATGAGGCTCTTGGCAGTCAAGGTAGTTTAAAT(   | 40545 | A_95_P194267 EB449400     |
| 41616 | 490 | 51 | 23   | CTGCTCTTAAATGACAGAGGCAGAGTTATACAGCAATGACTTTTGTCAATTGAAATCAT  | 40547 | A_95_P031671 EB431956     |
| 41618 | 490 | 53 | 995  | CCTTTATGTGATTTTATTGTAAGTGGTGGTATTGATTATTATCGTCTTGCCTGAATGC/  | 40551 | A_95_P016361 TA13241_4097 |

|       |     |    |      |                                                                 |       |                           |
|-------|-----|----|------|-----------------------------------------------------------------|-------|---------------------------|
| 41621 | 490 | 56 | 659  | GGTAAGAATGGACTGAAGCCATCTCATCGACATTACCAGGCTCATAATCAACTAAAC       | 40557 | A_95_P037836 BP129106     |
| 41629 | 490 | 64 | 1587 | CATCGATTGGCTTAGTACGGTTTTGAAAGATTTGGTTGTGATTTTCAGTTTCGGTT        | 40572 | A_95_P008481 X84226       |
| 41637 | 490 | 72 | 730  | CCATGTGTATACATTACAACCTGTTGGATGGTTGTTACCCATTGTATCGTATTGTATT      | 40588 | A_95_P011726 DV160318     |
| 41641 | 490 | 76 | 120  | CGTCAACCTAACGAGCTAGTAAAAATGGTGGATGTATGTAGATGGAATTCATAATAA       | 40596 | A_95_P099013 BP534731     |
| 41651 | 491 | 1  | 687  | ACACTCATTTTGAGCTGGCCAGCTTTCGAGATAATGAAATTTCTTGAATTTGGCTT        | 40615 | A_95_P258366 EB679246     |
| 41653 | 491 | 3  | 1188 | TCCCATCCCCATATTGTTATAAGGCATTTAATTACCTTCTTTCATCATTTGAGAATA       | 40619 | A_95_P002186 AY695053     |
| 41654 | 491 | 4  | 521  | CGTATACGGGAGACTTCCCTTTAGTAGTAAAATTTTACCTTTCCCTGGTAAATTTT        | 40621 | A_95_P299453 FG637388     |
| 41658 | 491 | 8  | 445  | CATCTAAATGGACGAGAATGTTGCTGTGGCTTTGTTTTGAAGTGCCTAGTTTTTGC        | 40629 | A_95_P008726 EH617354     |
| 41660 | 491 | 10 | 792  | GGAACTGTTGGAAGTCTGTTCTTTGTTTTGTTCTTCCCTGTCTTCTGTTGTTG/          | 40633 | A_95_P186672 TA14176_4097 |
| 41661 | 491 | 11 | 1439 | ATGGAGGAAATTTTTGCCTCTCCATACCAAAAAAGATTCCACTTGCTGCCTGTGATT       | 40635 | A_95_P007046 TC45426      |
| 41663 | 491 | 13 | 412  | GTTTAGACTGGTAATCTTCGATCGAGGGTTTGAATCAGCTACGCGTGATGGTGGTA        | 40639 | A_95_P004851 EH664946     |
| 41665 | 491 | 15 | 167  | GCTAGAGGTACTTGGGAGATTTATCAGTCTAAAAATTTGGTATTGGATTGTTGGAA        | 40643 | A_95_P192052 TA15370_4097 |
| 41666 | 491 | 16 | 821  | GCTAACTGCAGGGTGTGGAATTGAAGACTCAGGATGTTGCTAATGCTGTGCTGTTT        | 40645 | A_95_P226994 EB425577     |
| 41668 | 491 | 18 | 884  | AACTCCAGTACTGTACCTGCTCTCTGCTATTCTTCTTTATGCTTTTGTAGAGGTTTTT      | 40649 | A_95_P019691 TA13952_4097 |
| 41670 | 491 | 20 | 238  | TACCGTTAAATCTTCAATATGAGCTTCTACGAGGACCTCTCTACTGGAGAAGTGGTG       | 40653 | A_95_P113487 CV021161     |
| 41674 | 491 | 24 | 514  | TTGGGCTAATGGGCTTGGGTTTGTAAATCTGTGTATTCCAAAATAAGAGAAAGTGAA       | 40661 | A_95_P308698 FG643338     |
| 41675 | 491 | 25 | 304  | GACTTCATGAACCTATTAGAGACTCGAAGGGACTGAGGATATATTATGTTAATACAT       | 40663 | A_95_P027426 EB429409     |
| 41679 | 491 | 29 | 208  | AGAGACCTGGTCATTGCTGTGTGTGTTGCTTATTTTATCAAAGCACTGTATTGCTT/       | 40671 | A_95_P112182 CV020560     |
| 41682 | 491 | 32 | 684  | CAAGCACAAGCACTTCACGGAGTAGTGATGATTGCTCAAGAGATATGATCCTTATCG       | 40677 | A_95_P015151 TA12653_4097 |
| 41684 | 491 | 34 | 592  | GAAACTGATTTTGTTCAGGTGTTATTACCTTTACACTATGGAGTTTTTGCGAATTCT       | 40681 | A_95_P228074 FG634396     |
| 41688 | 491 | 38 | 754  | GATAGAGCTGCTGGAGTGAATAATGCAACTAGTTGCGTTGAGTCTGGTTTTACTT/        | 40689 | A_95_P304688 FG136427     |
| 41692 | 491 | 42 | 298  | CTGTGCACCTTGCAATTGTTAAGATAATTCTCTTGTGATTCCACAATACATGTGTGC       | 40697 | A_95_P176542 TA11634_4097 |
| 41698 | 491 | 48 | 606  | GCTGTATAAAGCATTCTGTTTTATGTAGAGTTCAAGAAACGACGCACTTGTGAAAA        | 40709 | A_95_P252434 EH621105     |
| 41699 | 491 | 49 | 730  | CATACTGGATGTATGTTCCAGCTTTGGTTGTTAGCTTTAGTCACTTATAGTTGTTTTA      | 40711 | A_95_P291303 DW003703     |
| 41703 | 491 | 53 | 381  | TGCACCATTTGTCTGTAGATTTACATTGTTCCATTGGTGTGGTTCAGTAGATTCTCCT      | 40719 | A_95_P220697 TA21662_4097 |
| 41704 | 491 | 54 | 1421 | GTTGTTGAGGCACTCTTGTGCTGTTCTTTCTTCTTGTAAACCAAGTCTTTAATCTCT       | 40721 | A_95_P203137 TA17789_4097 |
| 41712 | 491 | 62 | 1219 | TGTTATATTTCAAGTGACGCTGCTAACTCCCCGAAACTGGAGAGATAGCTCTATTTGTC     | 40736 | A_95_P025051 TA14701_4097 |
| 41715 | 491 | 65 | 363  | TTTCATTTGGTGGTACAAATTTGTAGTCTCGCAATCCAGTCAAGTCAAGCACTCCCT       | 40742 | A_95_P210032 FG625993     |
| 41718 | 491 | 68 | 739  | GATGTCGGGCTATGTTTATCCGCAAATTGTAAGTCTTACTGTTTACTATTTCTTTGGGATTTA | 40748 | A_95_P207947 DW000106     |
| 41723 | 491 | 73 | 665  | TGGTGCTTGTAGATACATGCAGGTATTGTCTGGAGACTTCTTAAAAAGCTATAAGA/       | 40758 | A_95_P306008 FG633724     |
| 41731 | 491 | 81 | 914  | CTTCCCATGCAACCTCTGTTGTTACTTATGGAGTAGTTGTATTTATGCCTTTTATTAA      | 40774 | A_95_P023896 TA14103_4097 |
| 41736 | 492 | 1  | 504  | TCGTTTTCTGTCGCAATTTCTTCATTTAGAGTTTGTATCAAAAGTTGTATTTGCCGGT      | 40616 | A_95_P139572 FS411114     |
| 41737 | 492 | 2  | 1237 | CAGATATGCTTGGTTTCGTTTCATATGTTTTGGTTAACCTCTGATCTGATATGCTTGT      | 40618 | A_95_P205092 TA18206_4097 |
| 41738 | 492 | 3  | 493  | AAAGAGAATCTCTTGCAGAATGTCTTGAGTGCTATTCCCTCAGACCTCAACAGAGAT       | 40620 | A_95_P079780 BP527846     |

|       |     |    |      |                                                             |       |              |              |
|-------|-----|----|------|-------------------------------------------------------------|-------|--------------|--------------|
| 41740 | 492 | 5  | 1497 | TGTCAACGAGATTCTCATGCTTTTGCTGTAGAAAGTGGATTAATTTATAATGGGTTCTC | 40624 | A_95_P002621 | AF012823     |
| 41741 | 492 | 6  | 815  | TGCAAGACCACTCTGGCTGATATTTACTTCATTCAATAGCACATCCCACGTTGCTGCG, | 40626 | A_95_P192612 | TA15489_4097 |
| 41742 | 492 | 7  | 537  | TCAAGCTACTAGATCAATGCCCATGTATATATTTTTCCAGCTATTGGGTGGTTCTATTT | 40628 | A_95_P139617 | EB443423     |
| 41744 | 492 | 9  | 731  | GTTGAGGACTTCTGTGACTGTCAGTAAAGTTTTAACTGCGACATAACCTAGATTTAT   | 40632 | A_95_P159907 | EH618453     |
| 41745 | 492 | 10 | 723  | GGGGAGGCTAGAGAGCCTTTGCTTTAGATCCCAAAAATTTAATAGAAGATTTTATG.   | 40634 | A_95_P203467 | TA17859_4097 |
| 41749 | 492 | 14 | 786  | TTCATGTTCTAACCTTTCTGGCTCTTCTCGGCGACTGCTTGACAAATATGCTCTATG   | 40642 | A_95_P287118 | FG166026     |
| 41758 | 492 | 23 | 320  | TGCTGTCCTTCTATTTGGCTGTTCAAATAACCGTGTAAAGTCTCTAAATAAACAGAAT/ | 40660 | A_95_P090393 | BP530935     |
| 41759 | 492 | 24 | 616  | TGTAATGCTGTCTTGCAATTACGTTCTTGAAGTTTTCTCATCAAACAACTGCAGGG,   | 40662 | A_95_P248567 | FG643712     |
| 41763 | 492 | 28 | 850  | CAAGGACAACGGGTTTTGTGAAATGCCACTGTATCATTTTTCTCAACTTGAATTCA/   | 40670 | A_95_P179877 | DV158142     |
| 41767 | 492 | 32 | 433  | CCACTCAGGTTTTACGACGATCACTAATAAAGCCTAAATCACCAGAAAATCTATTA    | 40678 | A_95_P076265 | BP526939     |
| 41769 | 492 | 34 | 314  | ATTGTACATGGTGTCTTTGAGAAACACAACCTGTATAGGACTGATCAAAGTGCTA/    | 40682 | A_95_P188213 | TA14520_4097 |
| 41772 | 492 | 37 | 757  | AGATATTGATGGGCATCAGTTGAATTGTAGCTAGCTATTGATGGGAGAAAGGGGGA    | 40688 | A_95_P308458 | FG158665     |
| 41775 | 492 | 40 | 578  | GATGATATTTCCCAACACTTGTCTAACAAATGTAAGAATCTTAAGCTAACTCCATAGT  | 40694 | A_95_P008321 | EB683976     |
| 41778 | 492 | 43 | 702  | CCCTTATGATGTGTGGAATGCAACAGGTTAATGTTTGTTCCTATTTATCTCTGCT     | 40700 | A_95_P300923 | FG185895     |
| 41799 | 492 | 64 | 1429 | CGATCTTGCCGTTACCCGATTCTCAACATATAATACTGTTAATATCTCATAAGATCATA | 40741 | A_95_P205667 | TA18338_4097 |
| 41800 | 492 | 65 | 461  | GGGAATAACCCATAAATATCTGGAGTCTGGTGTTCAACTTTTATGTAAGCATTTTCTA  | 40743 | A_95_P088623 | FG639451     |
| 41801 | 492 | 66 | 684  | GAGCAGTGAAGTGCCTACAAATATTGGCAAAGAGAAAAAGCAACAAGATCAAGCT     | 40745 | A_95_P127067 | EB448422     |
| 41802 | 492 | 67 | 268  | CTTGTGAGTCAACTGGAATTTTCTGTTGCTTAACTGATTGGACTTTTACTCTGTTTCAT | 40747 | A_95_P129752 | EB429706     |
| 41803 | 492 | 68 | 735  | ATGCATTCTGGTCTATTTTCTGCTGCTGCTGTTATGGGCCTTGTGATTATTGGGCA    | 40749 | A_95_P189142 | EB424654     |
| 41805 | 492 | 70 | 468  | CAGCACGTTGATTAGGGTGGTATCACATTGGTGCTTTTTGGATTGTATGTATTCT/    | 40753 | A_95_P085945 | BP529418     |
| 41806 | 492 | 71 | 516  | TCTCAAGCTTGGGTCAAATGGTATGTTTTCTTTTTGCATGTCTTCTCAACTTTGTTAC/ | 40755 | A_95_P231959 | FG643750     |
| 41807 | 492 | 72 | 308  | TGGCAGCCTTCTATATCATTTTTGGCAGCTCTACTAGGAGCTATATATTCTAGCTAGC  | 40757 | A_95_P108372 | CV018807     |
| 41810 | 492 | 75 | 756  | AGGAATGGTTACCAGGCTAAATTTTAAAACGGAACAACGCCAGGCCCTTACCAACAC   | 40763 | A_95_P094188 | BP532594     |
| 41817 | 492 | 82 | 678  | CACAGGGAGACCTTAGGTTGAAGATTGAGAATCTTGCATCCTCACTCAAGTTCCCT    | 40777 | A_95_P220932 | EB441014     |
| 41819 | 492 | 84 | 599  | CGGATTCGGAAAATATTTGTTTCTTGTAGAGTTACGTTGGTGTAAATTGTGAGATAAC  | 40781 | A_95_P061130 | BP135186     |
| 41823 | 493 | 3  | 692  | TTTTGTGGTGAATTTCCCAATGTAGTGGTGTTCATGAGGTATCCAATTTACAGTCGA   | 40788 | A_95_P028146 | TA17198_4097 |
| 41829 | 493 | 9  | 284  | GAAAGGAGGTGATTTGTACATATCCTTCACTGGCATAAGTTCAGTCCCATGTGGAA.   | 40800 | A_95_P035713 | BP128546     |
| 41830 | 493 | 10 | 672  | TAAGAGGCCAAGTATTGAAGAAATGGAGATGTGTGAGGAGTACACGTGTGTGATTT    | 40802 | A_95_P306618 | FG635755     |
| 41832 | 493 | 12 | 714  | GTTCCACTTGTGCTGCTTATGTTTATCGCAGGATGTACAAGAACGGCAACACTATAC   | 40806 | A_95_P128837 | X84226       |
| 41837 | 493 | 17 | 656  | CATAGTTGGAGTTGCTAATGATCACTGCAGCAAGCACCTCCTGTGGTTAAAACTTTTT  | 40816 | A_95_P293513 | EB435122     |
| 41843 | 493 | 23 | 809  | TGTATTGGTGAATTCTGTTCTTGTTCCTTCCCTAAATGGTTTTATGGGGGCTTAATTGT | 40827 | A_95_P194092 | EB425719     |
| 41844 | 493 | 24 | 667  | TATAGCTGCTGTTTTCACTATGTGCTTCTACAATTAGGATATTTAACTTGCTCCAGCT  | 40829 | A_95_P303093 | FG644018     |
| 41845 | 493 | 25 | 186  | TGACATACATGGTTTGTCTTGGTGCCATTTAGCTTCTTGTGCTGGCCTTGAAGTGCTG  | 40831 | A_95_P033914 | AJ717885     |
| 41846 | 493 | 26 | 441  | GAGGGAGCAATCTTAAGGTTGACCTTGATATATTTGTATTCAATTGCACATACGGAA   | 40833 | A_95_P008306 | EB434574     |

|       |     |    |      |                                                              |       |                           |
|-------|-----|----|------|--------------------------------------------------------------|-------|---------------------------|
| 41849 | 493 | 29 | 494  | TTTTTCCCCAATTAATAATGAGCATAATGTGATGATTACCCTTTGTGATGCTCTAAGC   | 40839 | A_95_P286478 FG638507     |
| 41851 | 493 | 31 | 407  | TTGCCAGTAGATGGCTAAGCGATTCTCCATATTTACTTTTGCCTTTATCTTGTGG      | 40843 | A_95_P274968 AM839082     |
| 41852 | 493 | 32 | 732  | GATATCACACAAGAACTATCTGAGCTAGGGGTTACCCCAAGTTCTTGGTTTCCAAGC    | 40845 | A_95_P162487 EH621443     |
| 41854 | 493 | 34 | 712  | ACATAAGATTGATGAGAATGTAGCAAGGGAGATCATTAATCATAAATCACTTCGACA    | 40849 | A_95_P139097 AY081175     |
| 41856 | 493 | 36 | 706  | ACGCTTCTGCGTGATCTGCGTGTTATGGCCTAATTCAGACAATGCTTTCCAGTGATA    | 40853 | A_95_P156557 EH614280     |
| 41860 | 493 | 40 | 734  | GCCAGTGTAATTTTTAGCCATTATTGTATGTACCACTAGTTCCCTCCATAAAAAATCTTG | 40861 | A_95_P012581 TA14608_4097 |
| 41863 | 493 | 43 | 618  | GGCTATTGTATGTTGCCAATTGTGATATTATCCGCGATTTCACTGTTTTTGCCTGGTC   | 40867 | A_95_P305623 FG633903     |
| 41867 | 493 | 47 | 1125 | TGCTGCACCTATGTTAGATGGGTTGTTGACATCCATTTGTGTTAGGTGGTAATTAATA   | 40874 | A_95_P020151 TA15207_4097 |
| 41870 | 493 | 50 | 622  | CCTTATATCCATTGGCATGTCTGAATGGTATGTCTGGTAAGGCAAAGAACTGGATTI    | 40880 | A_95_P246137 TA12645_4097 |
| 41878 | 493 | 58 | 523  | CTCCTTGTAACTTGTACCATCTCAGAAGGATGATTATATGAAATGTTTTGTCTGCTT    | 40896 | A_95_P123967 DW003823     |
| 41880 | 493 | 60 | 624  | AAGAACATCTAGAGATTTTGGAGTCTGTCTCAATGGCGGTTAGTAGCTTGCTCGAGT    | 40900 | A_95_P278608 FG639919     |
| 41882 | 493 | 62 | 741  | TCTGCAGCACTCAACAATTTTACGCAACATGTAAAGTTTTCTCCCTATATTATGATCTC  | 40904 | A_95_P207347 EH615646     |
| 41889 | 493 | 69 | 323  | ATGTTTGACGAAACGATTTGGAGAACGTTTCGTAGAAAGTAGTAGATTGAGTTGAGG/   | 40918 | A_95_P124842 AM824464     |
| 41895 | 493 | 75 | 445  | GGCTTGGTAAAGTAATGTGTATGGGAGTAACAGCTGGAGCATGTGTGCTTACCTTGT    | 40930 | A_95_P152107 FG135146     |
| 41900 | 493 | 80 | 549  | GCTTAGAAATCCTAGGTATATTATCCAAAATTCTGACTGGGTTAAGGATTTGTTGCAT   | 40939 | A_95_P241320 FG193095     |
| 41901 | 493 | 81 | 825  | ATATATTGCATATGCCGTTTCCCGTCCATGCCGATTATTCTTCTCTCTGATGACTGCC   | 40941 | A_95_P287658 FG155231     |
| 41903 | 493 | 83 | 827  | AGACTTGTACTGTATGCTTCCGGATAATGAGTCAAGATTTGGGTTTTGGTGTGTTGCT   | 40945 | A_95_P200812 TA17289_4097 |
| 41912 | 494 | 7  | 718  | CGTTCTATGGTTGTCAATCATTTGGAAGTATTTAGCTAATAACCTTCTTGTACTTGT    | 40797 | A_95_P211457 TA19614_4097 |
| 41916 | 494 | 11 | 1000 | GAATGTAAATTTCTAACCTTCATAAATGGAAGAGGAGTCCATTTGTTGCCATCTGI     | 40805 | A_95_P204172 TA18009_4097 |
| 41918 | 494 | 13 | 0    | GCAAACAAGACATTTAAGAAACGTGTCACCTTTTTGTTTCTTCAAGATTAACCTGTA    | 40809 | A_95_P027131 A_95_P027131 |
| 41920 | 494 | 15 | 273  | ATGACAAGGAATACGTGGATGCTATAATGGAAGCAAGTAATTGGGGAATGACATCA     | 40813 | A_95_P070045 BP192506     |
| 41926 | 494 | 21 | 474  | AATGAGAGTTGAGGTGGAGTTGGAGTAGTACTTATCAATAAGATTTATGTTTACAT     | 40825 | A_95_P187387 TA14335_4097 |
| 41927 | 494 | 22 | 879  | CTGCTCAGAAGCTTGACGTGAATGCAGCATCTATAAGCAGTCCTCAGAAAATAAGT     | 40826 | A_95_P012241 EB681339     |
| 41928 | 494 | 23 | 523  | CACAATTAAGAGGGTGGGAAGCATAATTGTATGTCTCTGTTGCAGCTAAATGTTCTC    | 40828 | A_95_P100663 BP535477     |
| 41929 | 494 | 24 | 190  | CAAGTACAATTTCCGGAAGTTCAAATAAAGTATCATTGATGTTGCACAATTTCTGGT    | 40830 | A_95_P154767 EG649751     |
| 41930 | 494 | 25 | 478  | TCTAATTTGAGTTATCCCAATTGGAATGTTACTGCAATGTTATTTCTATGCGGTGGTT   | 40832 | A_95_P021521 TA12506_4097 |
| 41933 | 494 | 28 | 475  | TTGACATTATTGGTTAAGCTTCAACCTAGGTAGAGGAATAAGAAACCGAGACTCGGA    | 40838 | A_95_P057936 BP134343     |
| 41934 | 494 | 29 | 256  | GAACTTGCCGGGTTGAGGCATATGTGTTGTTGTACACCAGTAATGAAGTAAAGAC/     | 40840 | A_95_P098203 BP534363     |
| 41941 | 494 | 36 | 755  | AACTTTAGCAATGGCCACTAAGCAAGGATAACCTTTATCTTATGCTTGGTTAGTGAC    | 40854 | A_95_P223642 EB450831     |
| 41943 | 494 | 38 | 676  | GCCTCCTTTTGTGTTATGAAGTCTTGGTTTAAATGTGAAGCTCACGTAAATTGATGCA   | 40858 | A_95_P026441 TA15577_4097 |
| 41944 | 494 | 39 | 204  | ATTAGCGCATGAGGCACAAGAATTGATTCTGTATATGCTCAGTCTTCTCTGATGGAC    | 40860 | A_95_P105582 CV017530     |
| 41949 | 494 | 44 | 764  | GTATTTTGTGCTTGGACAGTTGGAATCCTAGTTATACATCTCAATGTCTTTTATGCC    | 40869 | A_95_P012891 TA13215_4097 |
| 41955 | 494 | 50 | 816  | TATTTGGAGATCAGAGACTTCTACTGGGATTCTTCATTGATAGTGCCTGCGGTCATGC   | 40881 | A_95_P310028 FG161371     |
| 41958 | 494 | 53 | 192  | CTGTGCTGCTTCATATGCTATTGGCTATTCCGAGAATTCTATTTGAAAACAAAGAAGA   | 40887 | A_95_P033274 AJ344596     |

|       |     |    |      |                                                             |       |                           |
|-------|-----|----|------|-------------------------------------------------------------|-------|---------------------------|
| 41960 | 494 | 55 | 240  | ATGCTTACTCATTGGCCAGACACCATTGGATTTGAGCTTATAAATCTCAAGAACTATC  | 40891 | A_95_P092438 BP531801     |
| 41966 | 494 | 61 | 732  | AAGATCCAATTCCAGGTTTTCTGATCTCAGACCATAATGCCTCCGCTGCTACCTTGACI | 40903 | A_95_P137862 FG137204     |
| 41967 | 494 | 62 | 371  | GTCTATCATTGGCCAATTGAAGGTGATACTGAGCCTGTAAAGATGTTTGATAGAACA   | 40905 | A_95_P085095 BP529195     |
| 41969 | 494 | 64 | 539  | ACTATATGCTAGTGAAGATGTAATTGTTAAGCCTGCTTCATAGTGTACGAGCTTCTGC  | 40909 | A_95_P001286 FG628825     |
| 41970 | 494 | 65 | 702  | ATCTGTCTTCTGGCTTAGAGTTCTCGAGATATTCGACTTTATGATGCAGTTATTAGC   | 40911 | A_95_P304013 FG636664     |
| 41972 | 494 | 67 | 381  | ACATGGCGATCTTTTTCTTTCTTTGAACCCAGTTGATTCTGCTATGGCTCTTTCTTCAI | 40915 | A_95_P281183 AM789543     |
| 41975 | 494 | 70 | 457  | GTTTCTCCATCTGATATATATTTCTGTAGTGTGATTTGGGGTGTAAACAGAAACGTATC | 40921 | A_95_P005456 TA11650_4097 |
| 41982 | 494 | 77 | 444  | TATGCATGGTTGAATATCATCTGGAATGATCCTTGGATTGATGTGTATCTGAAAATCT  | 40934 | A_95_P135912 EB439462     |
| 41994 | 495 | 4  | 1412 | GGCAGTAATGCTGCTCCAAATTTGCAGTAGCACATTTTGTTCCTTCTTCTTCTTCTT   | 40956 | A_95_P239959 X79004       |
| 41998 | 495 | 8  | 248  | TTGCACGGGTTTGGAACTGTTCAAGCATTGCTTTTTATTTCGAAGATGTTCTTGAATGT | 40964 | A_95_P133777 EB435463     |
| 42004 | 495 | 14 | 172  | TTTCCAGAAAAGATAGCCGGTTATTCCATAGCTTCCGTCGAAGAAGGGTGAGGTAAG   | 40976 | A_95_P093988 BP532514     |
| 42005 | 495 | 15 | 2327 | GTTTTACTGCTGAGGGTATTATCCAGGCTCATTTGTTATGACGTTTAGGTTAATA     | 40978 | A_95_P013031 TA11872_4097 |
| 42006 | 495 | 16 | 906  | GTGAGGCGCGACCTAACAAAATATTGGATTATCTTCTTTGGTTACGTTTGTATGTTAA  | 40980 | A_95_P004011 EB447510     |
| 42009 | 495 | 19 | 879  | GCAAGTCAAGTGGACATAGTAGTGGTAGAAGTGTACATGAAGCTAGGTCTGGATAC    | 40986 | A_95_P225292 EB425084     |
| 42014 | 495 | 24 | 783  | TAGGGCTCGATATTCCTGTAACATATACTGATGAAAAATGAATAGCAGCTTGGTATT   | 40996 | A_95_P293698 EB437163     |
| 42015 | 495 | 25 | 232  | CTATTGACATACTGGTCTGGAATTGTGAAAATGAACAGCTTAGTTATCTTTAGCCA    | 40998 | A_95_P159147 EH617100     |
| 42017 | 495 | 27 | 699  | GTGCTGTAATTGGTATTAGCCTGCTTCTACCAGTTTATGTTTAACTTAAGACTATGGI  | 41002 | A_95_P000171 TA11676_4097 |
| 42019 | 495 | 29 | 726  | CTTGCAAAGTCTTACATCTTTGAAGGAAGGTTCTGTTATGGACTTTTTGACAGTATAGA | 41006 | A_95_P016386 TA14662_4097 |
| 42021 | 495 | 31 | 330  | GATAAGATATTGGAGTATTAACAATGGTAGCTGCACAAGAGTGTCAAGGGTGGGA     | 41010 | A_95_P032031 TA16107_4097 |
| 42022 | 495 | 32 | 622  | ATACTACAATTGAAAAGCCTTCTGCCTCCGTATTCCCTGGTCTCTTTCTAGAAGCT    | 41012 | A_95_P098503 BP534506     |
| 42030 | 495 | 40 | 685  | GCAAGACAGACCATATTATCCATCAATGGATCCACAAAGGATGGGTGCCCTAGTTCA   | 41028 | A_95_P135572 EB439075     |
| 42031 | 495 | 41 | 744  | TAAAATTGTTGTCTCATTGCAAATTTGATAGGACCAGCCAATTATTATCCCGAATTC   | 41030 | A_95_P212822 TA19917_4097 |
| 42032 | 495 | 42 | 798  | TAATAATCTTGTAAAGACATGGACCACTAAAGCTAGTGACGGGTGGACACCTCCGCAA  | 41032 | A_95_P156427 EH613927     |
| 42034 | 495 | 44 | 187  | TTTTGGAGTACGAATTGGCCATGATGATGTGGATGGAGAGTGTCTGCTTGTATGTC    | 41036 | A_95_P008761 EH663687     |
| 42038 | 495 | 48 | 385  | ATATAACTTGAAGCTATGTGCTGATAGAGAGACTTACGAAGCCATGGATGCACTTGC   | 41044 | A_95_P100248 BP535291     |
| 42041 | 495 | 51 | 980  | GTCTTGCTGTCAATTGAAAATTTAGCCTAAATGGCATTGCTGAATAGGACAAAATGG   | 41050 | A_95_P186827 TA14210_4097 |
| 42042 | 495 | 52 | 710  | GTGTAGTGTCTTAAAAGGTCAGATCACATTGGATCTATTGTATGTAATCTTACTTT    | 41052 | A_95_P126442 EB425762     |
| 42050 | 495 | 60 | 747  | AAGCCCTTCCCGGACGTTACGAATGGGTGAAAGTAGATTGCTTGATATGTCCTGTA    | 41068 | A_95_P217372 EB681505     |
| 42054 | 495 | 64 | 814  | CAGCTAGTTTTAGAAAATGAAGACATGAGCACCTGGTACACCAAATCTTTGATATAC   | 41076 | A_95_P269506 EB424994     |
| 42055 | 495 | 65 | 687  | TGAGGCCGTGACTTTGTCAATGTTATTATTGGTGTGAAACTTTCTGTTGCTTTTTTGT  | 41078 | A_95_P204927 EB446634     |
| 42060 | 495 | 70 | 399  | TTATACATGTGGACACCTTCTGGTCTTATTGCATAAATGTTCCATTGCCTCAATTTGC  | 41088 | A_95_P096063 BP533456     |
| 42064 | 495 | 74 | 414  | TTGACAGTAATGTGAGTGAGCCTCAATGGTGCCGAATGAATTTTGTGTTAGATGCC    | 41095 | A_95_P005901 AM834148     |
| 42066 | 495 | 76 | 560  | CTAAAGGGGTTTTTCTGAGACTCTGAATTTTGTGTCAGTATTTAGTGATAACATTGT   | 41099 | A_95_P118572 TA13353_4097 |
| 42067 | 495 | 77 | 766  | GATCTTCCCCACCCATCTCATGGTGTGCTTTGCAAAATGTATCCCATGAGGAGAAAA   | 41101 | A_95_P310803 FG138225     |

|       |     |    |      |                                                             |       |              |              |
|-------|-----|----|------|-------------------------------------------------------------|-------|--------------|--------------|
| 42071 | 495 | 81 | 170  | GGACACAATTTGGAAGTATGAACCATTTTGATGTTAATGGCATGGGCTTACTTTAAAC  | 41109 | A_95_P130392 | EB430438     |
| 42072 | 495 | 82 | 798  | CCTTGTTTTTTGTTTTCCCTTGTTATATAGAGGAAAGAAGGATGATAGAGTCATCA    | 41111 | A_95_P126372 | EB425717     |
| 42073 | 495 | 83 | 1453 | CCCAGTGTAACAAACAGATGCCTTTTTGACACATTCAAGCGAACAATGATTATTTATT  | 41113 | A_95_P217757 | TA21009_4097 |
| 42074 | 495 | 84 | 434  | GAGGACGAAAATTATGTATGTACTCGAGATTTTGATCCCAGCATCAGTTGTAGTTTA   | 41115 | A_95_P152602 | EB682928     |
| 42076 | 496 | 1  | 370  | GTTTCATATTGTTGATGTTCCAGGGCATTCTCGTCTACGTCTGAAACTAGATGAGTTT  | 40951 | A_95_P085560 | FG633961     |
| 42081 | 496 | 6  | 424  | GACATGTAGATGTATTAATGACTCTTCCGGTCCCTTTTCTCATCTGTGAAATTTATTAT | 40961 | A_95_P162672 | EH621667     |
| 42082 | 496 | 7  | 778  | TTACTCAGTTTTCCAATGCTATTCAACATGCTCTCAAATCATCTTAAACCGTCATGAGA | 40963 | A_95_P228409 | EB678357     |
| 42086 | 496 | 11 | 348  | AGAAGAACCCCCACCTCTGGTTCTTTTTCTTTCTTTTGTTCATATGCAGGCATCCT    | 40971 | A_95_P095233 | BP533088     |
| 42088 | 496 | 13 | 387  | TAGAAGGGCAAGAAATTCACCAGAGCAACATTGGATGGTCCCCTGTTTATGTTGAGT   | 40975 | A_95_P146907 | TA19979_4097 |
| 42091 | 496 | 16 | 417  | TAGAGAGATGAAGCCTAACGTGTGGTTCGAACGGAGAGTTGTATTCTACACTCTCT    | 40981 | A_95_P071560 | BP525733     |
| 42096 | 496 | 21 | 844  | TGTTATACTTTTTGGTGGCAAACCTCTAGATCATCATGGTAATGAATGTTGAGACCAT  | 40991 | A_95_P269606 | EB425595     |
| 42097 | 496 | 22 | 570  | GCAACATTGATAATAGTTGACTTGAATGAAATGACTGACTACCACATTGTGGAGGC    | 40993 | A_95_P125422 | DW005212     |
| 42099 | 496 | 24 | 161  | GAAATCCAAAGGCCCCGATTCTTCTTCTACCAAATAGTACAAAAATTAATAACTACC   | 40997 | A_95_P033549 | AJ632828     |
| 42100 | 496 | 25 | 804  | GAAAGGTAACATTAGTCTTCTGGATCTATGGTAATCCTGTATTAATTTTCTCATTGGG  | 40999 | A_95_P116137 | DV158711     |
| 42101 | 496 | 26 | 558  | GAGAGAGAGACGATGATATTCATGATAGCAATAGGCAGATCTTACGAGTACCTGCA    | 41001 | A_95_P052551 | BP132952     |
| 42108 | 496 | 33 | 755  | TGGAGTAGACTCTCAACATTTTTAGAAAGGAAATAGGCTTGACACTTAGCATGTCC    | 41015 | A_95_P237979 | AF153278     |
| 42109 | 496 | 34 | 854  | GGCTAGCTTGTTGTCTTTGGTTAAACCCAGTAGTTAAAGTGACCTCAAACGAATTTT   | 41017 | A_95_P224382 | EB449788     |
| 42110 | 496 | 35 | 745  | GATATTCCAAGAGCATTCTGGTTGTGGTTTTAGTATATCCTTAGTGCTGCTATGAAA   | 41019 | A_95_P001676 | EH618501     |
| 42111 | 496 | 36 | 645  | GTATGTCCACGTCGTGGTTGATGAATTTGAATTCTCTTGCAATAAAGATGTTTTTGC   | 41021 | A_95_P308478 | FG642544     |
| 42122 | 496 | 47 | 808  | GTCAAGACTGTTGAAATTATGCTGCAGTAAGCTATCCTTATGGAGCTTAAATTTATT   | 41043 | A_95_P011516 | EB682378     |
| 42124 | 496 | 49 | 672  | ATCTAAAGGAATAAGCAACTTGAGTCGTATAAATTCAATGACAGAGCGGACAGAAG    | 41047 | A_95_P144682 | EB448178     |
| 42125 | 496 | 50 | 334  | ACCGACTTATGGCCCAAACCTCAGCTTTTAGAGCAAAACTTGTCAGTCTCATTATTG   | 41049 | A_95_P085510 | BP529304     |
| 42130 | 496 | 55 | 876  | AACTCAGCAAGCATCCAATCCTATACACACGGTGGCTAATAGTTTGAGCCTTCCAGG   | 41059 | A_95_P011531 | DV161576     |
| 42134 | 496 | 59 | 847  | CAGAGAGATGAGCATTCTGATCTTCGACGTGCTGCTCGTTTCGTTATGCATATAAACCT | 41067 | A_95_P251277 | FG136377     |
| 42137 | 496 | 62 | 343  | GGGTTAGTGAGGTTTGAATGAAAAAGGGCGTGACACAAATTATTCCAAATTTTA      | 41073 | A_95_P068745 | BP137204     |
| 42138 | 496 | 63 | 679  | CTTGGTGGAAACATATATGTCTGTCTTATTCCATGAATTTGGGATATCTTTTGCTG    | 41075 | A_95_P210667 | EB678572     |
| 42142 | 496 | 67 | 1169 | TGAAATATTACCGTCGACAACCTGATGCTCGATTTCATGAGACGACTGGGAATCCCA   | 41083 | A_95_P201247 | TA17382_4097 |
| 42143 | 496 | 68 | 717  | GTCGTCTTTTATACTTTCAATCCATGTGACATTGAAGCGCAAAGTATACTGAAGAAAG  | 41085 | A_95_P003291 | EB437101     |
| 42145 | 496 | 70 | 684  | GGCTTCCTTTGTTCTCATGTCAATGATGATTGAAGTGTCACTCAACTATGAATTGTGTA | 41089 | A_95_P215287 | TA20451_4097 |
| 42153 | 496 | 78 | 466  | CTTGTTACATCAAGTCATCCAGGGAAAAAGCTAATTTAGTTTGTGGTTATTCCATCAA  | 41104 | A_95_P024111 | EH623214     |
| 42158 | 496 | 83 | 938  | CGGTGCTTGGGATTGTAATCTTGTGTGGCAATATATGTTGATCAAGTATCTGTA      | 41114 | A_95_P011086 | TA15475_4097 |
| 42159 | 496 | 84 | 772  | CATCAGTCATTTAAATTTGGTGGGATGAACTGTTGCTTTATTGGTCAACTTAGGTCTA  | 41116 | A_95_P148302 | EB677571     |
| 42163 | 497 | 3  | 773  | TCCCTCAAAGCTGGGGAAGTTCTTAAAGGAAAAGAAAGTAAGAAGAATGATTGGA     | 41121 | A_95_P230199 | DV158861     |
| 42169 | 497 | 9  | 1615 | GGTGGCTCGGAAGTTTTGTTGTTATGTTGTCTTAAAGATACTGAATCCGAACCTAAA   | 41133 | A_95_P237919 | AF120093     |



|       |     |    |      |                                                              |       |                           |
|-------|-----|----|------|--------------------------------------------------------------|-------|---------------------------|
| 42177 | 497 | 17 | 284  | TGAACTGTAAGAACTTGAAACTTGCTGAAAGGCGAAAGCTGTTATAAATTTGGGTT     | 41149 | A_95_P203307 TA17826_4097 |
| 42179 | 497 | 19 | 605  | TGTATATTAACGATTGTAATTCTACTGAGGTCCTTGAAAGCAATAAACTCCTGTTGTC   | 41153 | A_95_P020626 TA12820_4097 |
| 42188 | 497 | 28 | 380  | GAAGTTTGAAATCCCTGGTCAAGCTCCATGTGATTAGCATGTTTTGCAATATTCTA/    | 41171 | A_95_P072675 BP526024     |
| 42189 | 497 | 29 | 734  | GGAGGATACTTTAGCTCTGCTTTCCTTGTTTCCTTGATTTATAAAATGTCTAAAATTGC  | 41173 | A_95_P191422 TA15234_4097 |
| 42191 | 497 | 31 | 377  | AGAATGCTCCAATATAGGAATACTATCTGAGGATTCTCTGTATCATATGCAAAGGA/    | 41177 | A_95_P079350 BP527740     |
| 42198 | 497 | 38 | 526  | CATTTTTCAAGTTTGAGTTTTGTGCGAAGTCGTCGGTGTAGCTTCGTGGTCTGAATTAGC | 41191 | A_95_P028366 TA19522_4097 |
| 42200 | 497 | 40 | 494  | TTGGAATGACTGTGAACATGCCGGTAAAGAATGACTCTTGTTAATGTACTTTTTTCAA   | 41195 | A_95_P211772 TA19686_4097 |
| 42201 | 497 | 41 | 766  | CCTAACATTAAGATATGTGCAATGCTCCTTGCTGCTTGTGTTGTGTATGACATATTTG   | 41197 | A_95_P127902 DV161576     |
| 42202 | 497 | 42 | 1019 | TTTCTAACAGTTCTCCCTCTATGTGAAAGTAAACGAACTACTTGTAAGGTTATCTATC   | 41199 | A_95_P141067 TA12884_4097 |
| 42203 | 497 | 43 | 108  | GTGTTATTGAGGAGGAAACAGAAACCTGCACCCTACATCTTCCAAAAAATTGCCAC     | 41201 | A_95_P038326 BP129244     |
| 42207 | 497 | 47 | 144  | TTAGAGAAGAAAATAAGGGGCTTCAGGCTCAACTGAGGGATACTGCTGAAGCTGTA     | 41209 | A_95_P034334 AJ718475     |
| 42211 | 497 | 51 | 671  | GAAGTAGTTAAATGCGAATTATTTGGAACCTGTGTGTGCTTAAGATGTGATAGTTCTC   | 41217 | A_95_P012856 DV160997     |
| 42212 | 497 | 52 | 734  | CTGCTTGCTGAATTATTCTATTTAAGTGAATCCTCACTGTGTTTTCTGTGGGATCGT    | 41219 | A_95_P155152 FG139568     |
| 42221 | 497 | 61 | 491  | TCTGTTAGAAGCATACATGACATCTGATTGTGTTTTCCAACTTATAATCTCTCTTCAGC  | 41237 | A_95_P035328 TA17207_4097 |
| 42231 | 497 | 71 | 409  | GGGACTAAGGCTGTAACCAAATTTACTAGTTCTTAGATTTGAGATTTGGTGGATTTTA   | 41257 | A_95_P002361 TA13470_4097 |
| 42236 | 497 | 76 | 866  | ACTGAAGCCTACAAAGGTCAAATTGTTGGAGTCATTGTCTGTAATGGTGCACCATCA/   | 41267 | A_95_P227524 DV161230     |
| 42243 | 497 | 83 | 767  | GCAGTTTGTCCAGTGTCTACTGTTATATAAACGAATTATTACTGAACAGGATTTGT     | 41280 | A_95_P188127 TA14500_4097 |
| 42251 | 498 | 6  | 1898 | GCACTTTTTATCCTTTAACTTTCAAGTTGCTGAAGGATAGAGGGTGCTTAATTATCTGC/ | 41128 | A_95_P198092 TA16705_4097 |
| 42252 | 498 | 7  | 785  | GGCGAGTTGCTTAAGTGGTTCACTCGGTTTTGGCCTTTCTGTTCTTTTTCTTTTT      | 41130 | A_95_P223457 TA22255_4097 |
| 42253 | 498 | 8  | 509  | TTGCAATCCTTAAGGCGTTTGGAAAGCTAAGAGGAAAAGATTGGAGAAAATGAAGAA    | 41132 | A_95_P107307 FS413389     |
| 42255 | 498 | 10 | 687  | TGAAGCGTCAGATCACACACATGATTAGATAACAAGTATGATCCATTCAACATTGGGA   | 41136 | A_95_P306873 FG636650     |
| 42256 | 498 | 11 | 423  | GGTATGACCATGAATGGGGTTACAGCATCTCGATGTGATTGATTTGATCTGCCATAT    | 41138 | A_95_P105952 CV017701     |
| 42261 | 498 | 16 | 521  | ACGGCGACAAAGGGCGTTATGCCTGTTTCTTAAATAAATATTTTTCTGAACACTCAA    | 41148 | A_95_P156392 EB678300     |
| 42267 | 498 | 22 | 613  | CGCCTGTTTTGTAAAACCTAAGACCTGTCTGTATGTGGTGTGTTTATAATGTATACCT   | 41160 | A_95_P009761 DW005003     |
| 42271 | 498 | 26 | 657  | GCGGGGAAAACATTGATACGTCTGACGTGTTTTTCTGTAATAGTAGTATTTACCATT    | 41168 | A_95_P211937 TA19723_4097 |
| 42276 | 498 | 31 | 832  | CGCTGCATATAAATATGGTAGTGTCTAGTGTAAATACTACAGCCATACCCCTATTTCT   | 41178 | A_95_P013536 TA14508_4097 |
| 42289 | 498 | 44 | 641  | CAACTGGGGGATAAAATTTGTAAAGAGTTGGCAGGCTTTCCCGTTATTTGTCTGA/     | 41204 | A_95_P148127 EB677332     |
| 42297 | 498 | 52 | 921  | GGGGGTATTTGCCTCAAATTTTGAATCTTTGAGTTGGTGATATTTGTTATAGAATGG    | 41220 | A_95_P212172 TA19776_4097 |
| 42299 | 498 | 54 | 707  | CTAGCTAATATGTGGATTGTTATGCTTATGGTTTGTAGTTCTGCTGCAATACTGTTAC   | 41224 | A_95_P255454 DW005098     |
| 42300 | 498 | 55 | 754  | CAGGCATGGGTTATATTCTTGTCACTGTACTATTAGGTTATTTTTCCATGTACTCTTG   | 41226 | A_95_P292368 EB427237     |
| 42302 | 498 | 57 | 785  | CTCTGGTTTTACTGATAAGCTTTTGTCACTGAGCACTGGTTATATATAATGGAATGG/   | 41230 | A_95_P183032 EB440103     |
| 42311 | 498 | 66 | 426  | ACCTCGAAAACCCACAAGTGAATCTATAGGAATGGACTGGAGAACATTATTTAA       | 41248 | A_95_P122877 DW002822     |
| 42313 | 498 | 68 | 416  | CTGTTTTCTGTGACTAAATCAGCATATTTGGTTATCTGGAGGAAGATGAGTTAAATT    | 41252 | A_95_P071945 BP525831     |
| 42314 | 498 | 69 | 497  | GGTAGGCCATTTGTGGATGCTGTTCAACCCTTGAAACAAAAAGCTTTTACATTTGAT    | 41254 | A_95_P189362 EH622255     |

|       |     |    |      |                                                             |       |                           |
|-------|-----|----|------|-------------------------------------------------------------|-------|---------------------------|
| 42318 | 498 | 73 | 757  | TAGCAGCCATACAGAGCTCCTAGTTATTTACTCACAATGAAGTTTCTTCTTTGGATTC  | 41262 | A_95_P209707 TA19247_4097 |
| 42319 | 498 | 74 | 339  | CCGGGGTTGACTTGGATAATGAATGAACCCCTTATAGGACCATCTTAAAAATCTATTTT | 41264 | A_95_P139687 EB443547     |
| 42322 | 498 | 77 | 0    | CAAAATCCAGTGGGTGTTTTCTCTGCCACTATGCACAGAGCCCTGAATACTAGAAGTC  | 41270 | A_95_P314098 A_95_P314098 |
| 42327 | 498 | 82 | 507  | CCGTGGCAGTTCATGATCTTATATGGGGGTTTTATTACTTGCTGGTCAAAATTTGTAT, | 41279 | A_95_P291393 DW004030     |
| 42328 | 498 | 83 | 1274 | CATTATTCAGAACTAAATGTAAATCAGATGGTCATGCCATCAGCACTTATTTGCTATT( | 41281 | A_95_P015146 TC42598      |
| 42329 | 498 | 84 | 159  | GCAGGTTTTGTGTATCTTGTTGTAGTTCACATTGGTAGCTTTTCATTGTTTCTAAATG  | 41283 | A_95_P089248 BP530419     |
| 42336 | 499 | 6  | 777  | AGGCTTGGATTTTTGGTGGATTTTCTATCACATTCAACAATTACTGGATTTATGGGAG  | 41293 | A_95_P127572 EB427794     |
| 42338 | 499 | 8  | 731  | CTGAGAAGACTACTGAGAAAGAAATCAGTGATGACGAAGATGATGAGCCCAAGAA/    | 41297 | A_95_P246497 EB430190     |
| 42340 | 499 | 10 | 212  | TGTTGAGCTTTTTGCCAGCTTGATGTTGTCATAATAAACAGCTTGCTAGGTTGCGC    | 41301 | A_95_P164383 EH623606     |
| 42341 | 499 | 11 | 765  | ACAGTGTGCTAGATATTAGATAATGCTGTGCTGTAAAAAGCGCTTTTATCATCAGTTC  | 41303 | A_95_P226134 FG186345     |
| 42342 | 499 | 12 | 501  | TTGAAAGTCCACACAGGCCAGCAAAGTTGCCTGTATTGGAGCAAGCCAATAAACATG   | 41305 | A_95_P054371 BP133418     |
| 42345 | 499 | 15 | 793  | GTGAAGACCTGTTAGTTTTATGTAAATAGTGACCATTAGACAGACCATGTAGATAGT(  | 41311 | A_95_P115772 DV158104     |
| 42349 | 499 | 19 | 668  | AGGCCTTAGTTCCTTCTTGGCCAGTATACAAAAATCGATCCCAAAGAATCAATATCAT  | 41318 | A_95_P159527 EH617777     |
| 42352 | 499 | 22 | 649  | GTTGCACTAGTTGGCCAGTTTGACATTAACAAAAACCTTTGTGTCTTTTCGAGTCTT   | 41324 | A_95_P107872 TA12059_4097 |
| 42361 | 499 | 31 | 490  | TAAGTACATACGATACATATATAATCGGGTGATACTTGAAAATGCAACAGTTCGGGC   | 41341 | A_95_P034309 FG133389     |
| 42362 | 499 | 32 | 1020 | CATATTTATGTTGAATTAGGGGCGTTCTATCGGTTGGTGTGGTACGGTTTTAAGTTCC  | 41343 | A_95_P179512 TA12524_4097 |
| 42368 | 499 | 38 | 827  | TGTATGTTGATGTAATTTGCTTCCTGTTTTGCCACTACTTTGGTCAGCTGCTGTACAA  | 41355 | A_95_P250097 EB449449     |
| 42372 | 499 | 42 | 889  | GGGGTTTGATCGGCTTATAGATTGTTTGATCCGTCATTATTTTTGGAGATTAACAAAT  | 41363 | A_95_P289203 DV158051     |
| 42375 | 499 | 45 | 340  | GGTCAACATAATGGTTCATTTTGGGAAGCATTGAGTTGATGTTGTAGATTTGTCATG(  | 41369 | A_95_P107567 TA12386_4097 |
| 42377 | 499 | 47 | 829  | GCCATCACGAAAGACTAAAAATAGAAATTTACAGTGACCCCAATAACATGATAAGGA   | 41373 | A_95_P272776 EB678072     |
| 42383 | 499 | 53 | 498  | TCCATGGATTTCTACGGACCAAAGACACACCCCGTGATGTACTTGGCTATTTTGATAG  | 41384 | A_95_P276528 TC57333      |
| 42384 | 499 | 54 | 821  | AGAGGATTCGTCTAATGAGGTTATACAAATGTTAGAACGGGAGATAATTGAGCTAA/   | 41386 | A_95_P149432 EB679278     |
| 42385 | 499 | 55 | 782  | CTCGTAACTGAAGCTTATCTTTGACTGCATAAATTTAGCTTGTGAACTCGGGTGCT(   | 41388 | A_95_P271961 EB446465     |
| 42388 | 499 | 58 | 1289 | AAGTTTGCCTGCTTCTAAGATGTAATCTGGTTTCCATGTCCATCTATCCTTTTCCTC(  | 41394 | A_95_P222262 TA21995_4097 |
| 42393 | 499 | 63 | 915  | CTCGGGAATTCGGAATAGTTGTAGAATGAGGAAATCAAATATAGGAGCGTCCTTTGC   | 41404 | A_95_P178142 TA12161_4097 |
| 42402 | 499 | 72 | 106  | TTGATTTCAATTCAATTGCCTTCTTGTTGGATGGTCGTCGTCCTTCGATGGGGCAGCA/ | 41422 | A_95_P107132 CV018222     |
| 42403 | 499 | 73 | 733  | GACCTAAAATACCTAGCCTTTTCTGCTGTTGAGTATTCTATTCAATCTCTGTATATGTA | 41424 | A_95_P290293 DV162581     |
| 42404 | 499 | 74 | 682  | TAATTGGTCGTTGCAACAATCACCTATACACATTCAAGTACTATCTACGTTTATCTTCT | 41426 | A_95_P185542 TA13937_4097 |
| 42407 | 499 | 77 | 611  | TTTTCGTTTACTACTGTTCTTTCATACTTACTTCCGCGCTCTGTAACAGGTGCATCAGT | 41432 | A_95_P082465 TA15194_4097 |
| 42412 | 499 | 82 | 756  | CTCAAGTGTGTAAATTGAAAATGTTCTACCTTCTATGTGACAATTAAGCTGATCCG    | 41442 | A_95_P290298 DV162605     |
| 42417 | 500 | 2  | 770  | TTAATGTACTTCTTAAGAGGAAGTCTCCCTTGGCAGGGGCTGAAAGCAGGCACTAAG   | 41286 | A_95_P016601 EB428048     |
| 42419 | 500 | 4  | 892  | CGATTGGGAGTAATTCAGCAAGTACTTCTGAATAATGAGGTGAATTTGATGTTGTAA   | 41290 | A_95_P210517 TA19414_4097 |
| 42437 | 500 | 22 | 137  | TCCGATAGTTGCTCTAACACGTATAAGATGCCAGTGATGGTATTATTGTTTTTCCCT   | 41325 | A_95_P109312 CV019240     |
| 42441 | 500 | 26 | 761  | CGAGAAGAGAGAGATGATGTTACAAAGAAAGCTGACATCAGTGACTTTTACTTCAAT   | 41333 | A_95_P149022 EB678686     |

|       |     |    |      |                                                             |       |                           |
|-------|-----|----|------|-------------------------------------------------------------|-------|---------------------------|
| 42443 | 500 | 28 | 495  | AGAAAAACCCATCTTTTGGAACTATGTGTTACTACTACTCCCTCCCCAAAAAAGGAT   | 41336 | A_95_P035813 BP128573     |
| 42444 | 500 | 29 | 772  | AACTGCTGCTGTCAATCCCACCCATTTCTTAAGTTAGCTGATGCACTTAACCTGAAAG  | 41338 | A_95_P163472 TA12252_4097 |
| 42446 | 500 | 31 | 535  | GGACATGCTCTTGTGCGAAAAATGCCGATGTTGTATTTTTGCAAGTTCAAAATTTCAA  | 41342 | A_95_P122257 DW002283     |
| 42447 | 500 | 32 | 475  | ATTGCCATCTCATCTGTACAACATTATTTGTTGTAATTATCCTGTGTATAGGTGTTGCC | 41344 | A_95_P314963 FG178196     |
| 42456 | 500 | 41 | 207  | GGAATCGTAATGTGTACAAGGATGTTGCCTTTCTGTTGTCTATCATGTAATTTATAG   | 41362 | A_95_P028746 CV021398     |
| 42459 | 500 | 44 | 833  | GTCTGGACCTGTAATGTACTTACTGTATTACTGTAATACATATGAAGAAATTCAGAGC  | 41368 | A_95_P023151 TA19042_4097 |
| 42461 | 500 | 46 | 519  | CTGACTATTAACAGCCAACCTGCAGTTAATGCTGAGAAGTCTGACTCTCCTTCTGTTG  | 41372 | A_95_P142477 TA16719_4097 |
| 42464 | 500 | 49 | 1056 | GATCCTCTGTTCCATTTGCAAAATGAGGTGCACAATTTCTCATGATGTGAAAAGTTAT  | 41378 | A_95_P207177 TA18683_4097 |
| 42465 | 500 | 50 | 722  | CTTCTCTGTTTTAGCTTTCTAGGAATATGGTGAACGAAAGGATGTTCAAGATTTCTT   | 41380 | A_95_P163002 EH622003     |
| 42478 | 500 | 63 | 669  | TTGACTGTCAATTTGAATTTACGCATATATGCGCTATTCCGCTATTGTAGTTGTTG    | 41405 | A_95_P207582 EB447363     |
| 42483 | 500 | 68 | 827  | TAATATCTGACTCGTGGATGAGCTTCTGTAGTCTTAGAATCATATGCTACGGGGGT    | 41415 | A_95_P190347 TA14996_4097 |
| 42493 | 500 | 78 | 701  | GGGAAGTGTGAGAGGCTATCAGTACAGATAGTTCAGTTGATGAACTCAATTATATAA   | 41435 | A_95_P163022 EB425650     |
| 42494 | 500 | 79 | 625  | TCTCTTTAAAATGTGGTTCTCATCTTAGAATTTATCAAGGCTGGAATGTGGTTTTGTA  | 41437 | A_95_P236269 BP133465     |
| 42499 | 500 | 84 | 788  | CATATGTGTAAGAGACTAGCCGCACTTAAAAGCCGAGTACTCTACCGTTGAGTTA     | 41447 | A_95_P022061 EB426325     |
| 42502 | 501 | 2  | 1468 | GAGGTGGATCGCTTGATTGGTTCTGTTTTAATTTACTGAAGTCATAGTGACGAAA     | 41449 | A_95_P238419 U94192       |
| 42505 | 501 | 5  | 966  | ATGGGGAAGATAAGTTTTTTGTTTTGCTCTTTGTACAACCTGGTGATTACGAAGTCATG | 41455 | A_95_P199162 TA16932_4097 |
| 42506 | 501 | 6  | 477  | AAGGCCGTTTTGTTGTGCTTCTTTTCAGTTGGTTAAACAATTTTACTGATGCTTTCAC  | 41457 | A_95_P123837 DW003728     |
| 42510 | 501 | 10 | 378  | CCTGATGCAAATGCTTTGTGGTGGTTGATTTATGGTTCATATTGAAATCCAGTTATT   | 41465 | A_95_P033779 AJ632969     |
| 42513 | 501 | 13 | 524  | GACTTTGCTCTTATTTATAGTCTCATTTGCATGTTGTGTGATCGCCCATGATTTTCAA  | 41471 | A_95_P147547 EB452030     |
| 42515 | 501 | 15 | 1470 | CTAGAAAACGCTGTTCCCTCTCGAGGATGGGAATAACAAGCATATTTGGGGCTATATC  | 41475 | A_95_P021121 TC41439      |
| 42517 | 501 | 17 | 871  | TTGCAAAAGCTATTCTGGAGAAATCAGAAGGGAAGGTTTCGGTTAACAGGTCTAGGT   | 41479 | A_95_P233874 DV999224     |
| 42518 | 501 | 18 | 636  | TGGTAATGGCACTTCCAGCTGGAAACAGGGATGATCTGCCATTGACCAATATGAGTA   | 41481 | A_95_P053141 BP133098     |
| 42520 | 501 | 20 | 460  | AACAGCAGCTACGTGAACCTGCTATGCTTAATGGTACTCTTCGTGAAGAAGTTCTC    | 41485 | A_95_P200797 EB449689     |
| 42522 | 501 | 22 | 543  | CAAAAAGCGGAAGACATCAACAGGTCATACATCACAGGTTTCCAGAAGGATGAGAG    | 41489 | A_95_P199787 DV159856     |
| 42524 | 501 | 24 | 590  | TGGGGAATAGCCAATCATTCTGGGCAATTTAACAATATGGATAGCTTTGGTTGGAG    | 41493 | A_95_P020991 EB681060     |
| 42536 | 501 | 36 | 418  | GACCCTCATACTTGAGATTTGATCGTTCATATCTCAGTTGAGTTTTAATAGATGATCT  | 41517 | A_95_P072055 BP525859     |
| 42537 | 501 | 37 | 0    | ACCCGTGGCATCAACTATGAGTTAAATGTTCTTCAGTAGATTGTTCAAGTATTGAGTT  | 41519 | A_95_P027991 A_95_P027991 |
| 42539 | 501 | 39 | 724  | AGCTGGTTTTGCCTGCTCCGCTATGTTATTTTGTGAGAAAATGCCAAAATTTTCTC    | 41523 | A_95_P219492 TA21407_4097 |
| 42541 | 501 | 41 | 699  | CGTTTCTGCCTCTTGAATATTCTCTATATTGTCCCCTTAAATACTTGTATAGGGGTC   | 41527 | A_95_P147432 EB451842     |
| 42543 | 501 | 43 | 812  | CTGTTTCGCTTCTTACGGAATTTCTAATGCTAAGCTAATAAGATACTCGTTATGATAC  | 41531 | A_95_P201537 TA17446_4097 |
| 42544 | 501 | 44 | 267  | GGCACCGGGAGCTACTGTTTGTAGATCATTATTTAATTTTCGATTTTGAAGTAACAA   | 41533 | A_95_P140592 EB444477     |
| 42548 | 501 | 48 | 194  | TGCGGTGTAATCTTTAGACATGATGTTGAGTTTTGGGCTTCTTAAACTATAATTTCT   | 41541 | A_95_P102387 CV016003     |
| 42549 | 501 | 49 | 440  | CTAGACAGCCAGAACGAAAGTCCAAATCATGTGAGTACAAACGTGCTTGAATAG      | 41543 | A_95_P112587 CV020746     |
| 42552 | 501 | 52 | 203  | GGTTACAAGGATGTTTCGCAAAGAAAACCACCAGATGTTTCGAGCAGCTACTGATTGA  | 41549 | A_95_P164977 EH624438     |

|       |     |    |      |                                                               |       |              |              |
|-------|-----|----|------|---------------------------------------------------------------|-------|--------------|--------------|
| 42553 | 501 | 53 | 1322 | CATATTACGAAATGCTGGTTGTTGAACCTCTTTTCGGCAATATAAGCATGTTTTGTTI    | 41551 | A_95_P014476 | TC56514      |
| 42554 | 501 | 54 | 709  | TGGGATAAGGATGTGCCTGTAGCTTTTGGATATTTGGGTGATATACTTCAGAAATTC/    | 41553 | A_95_P170511 | EH664919     |
| 42557 | 501 | 57 | 547  | CACAGAGCAAGGCCAGGAAAGAGTTTGTATTGTCATATGAAATCAATAAAACATGTT     | 41559 | A_95_P101763 | TA14806_4097 |
| 42562 | 501 | 62 | 782  | TGTGCTTGTGCTTCAGGGTTAGGTTGTTGGTTCTTTAATATGTAATATAAATGCCATT(   | 41569 | A_95_P253239 | DW003641     |
| 42564 | 501 | 64 | 697  | TAAAGTTTTACCAGTGGAGGTTTCTGTATGATTGAAATAGGTCTCCCAGTCTATAATC    | 41573 | A_95_P239694 | DV159666     |
| 42566 | 501 | 66 | 754  | GCTTTTGATACTGTTTTCTCTGTCATGGACTTGCTGTTATTGAAGGGATTGAATTTG/    | 41577 | A_95_P014746 | TA12923_4097 |
| 42567 | 501 | 67 | 445  | TGCCAGTTCAGTGTACTCCGAAAGATAACAGTATTGAAAATATAGGATGTAGTCI       | 41579 | A_95_P040311 | BP129792     |
| 42568 | 501 | 68 | 1703 | CCCCTTTTTTGTTATGTCACATAATAAGGGGGTAAATGGTGATCTTGTATATTTGA'     | 41581 | A_95_P179842 | TA12596_4097 |
| 42569 | 501 | 69 | 1299 | GAGTGAACCTTTGCTATTGTTTTGCCTCAAAGAAAGGCTCTTTATTATGTACAGAAGCT   | 41583 | A_95_P180412 | AY286010     |
| 42573 | 501 | 73 | 630  | GCGTTCCTTTATCGTTTATCATGTAAGAGCTATTTTACTGTACATAATCGGAAGG(      | 41591 | A_95_P018981 | TA15283_4097 |
| 42583 | 501 | 83 | 450  | GACGTAGTGCAGGAGTATCTGTTATTGAATCATGTGATCAATATTAGTCTCTCTTAGT    | 41609 | A_95_P110867 | TA14944_4097 |
| 42587 | 502 | 2  | 172  | AATGCACTTCAAATTTTCTAAACAAGCCATAGACTTTACCCTGCCATCTAGGACCCG/    | 41450 | A_95_P154572 | EG649650     |
| 42592 | 502 | 7  | 1220 | ATCCTCAAAGCTAGGAAACGAAGCTGCAAAACATGTATGTTGAATTCTCAAATTTTC     | 41460 | A_95_P005986 | TA15194_4097 |
| 42605 | 502 | 20 | 896  | AGTAGAAAACTTAGATCTGAATTTTGGCGGTCTAAATGATTGGAATGATTGATCGC.     | 41486 | A_95_P190382 | TA15003_4097 |
| 42607 | 502 | 22 | 809  | GTATTGGTACTGGGTAAGCTGTTACAGTTTGTATCTGAATAAAGGACTGTGCATCC      | 41490 | A_95_P024161 | TA16385_4097 |
| 42608 | 502 | 23 | 702  | GCACTTGTGACACCAGGTTCTGGGACGATTATAGGATACTTAGTGTGAAGACACAA      | 41492 | A_95_P266686 | EH616930     |
| 42609 | 502 | 24 | 186  | CAACGTATTGCATTATTTATGCAACCTGATTGGGACCAAAGCTTAATTTCCCGAAG      | 41494 | A_95_P051316 | BP132613     |
| 42610 | 502 | 25 | 616  | ATCCTTTTCGAGACCAAGTTGTTGTGCTGATAGGGAGTGCTGCAAGTGCTACTGATA'    | 41496 | A_95_P129117 | FG170823     |
| 42611 | 502 | 26 | 979  | CTGTGGGGCTGTGATAACAAGTTCTTATCCGTATATTTGACTTATCATCTGATCTATTT   | 41498 | A_95_P201087 | TA17349_4097 |
| 42614 | 502 | 29 | 547  | GTGTAATGACCCAGTCACCGCAGTGAAAAAACAGAAGATACCTTCATTGCTGAAT       | 41504 | A_95_P164237 | EH623373     |
| 42619 | 502 | 34 | 268  | AACAAGTTGTTTCTGGTATTAATATTACCTTAAAATCTCCGCAACTACTTCTCAGGT     | 41514 | A_95_P156542 | FG642287     |
| 42622 | 502 | 37 | 441  | GTAATCATCTTCTTTCACAGCCTCCATTTCTGAGACGGTTTTGAGACCTGCTCATCTG    | 41520 | A_95_P090038 | BP530775     |
| 42623 | 502 | 38 | 692  | GTTCACTCCTTTGCTGATGGAAGTGTCTGTACCTATGGGCTATAAAGAAGTAGAAI      | 41522 | A_95_P209987 | EH621158     |
| 42625 | 502 | 40 | 420  | TTAGTGGTTTGCCTAATTGTGAAACCTCCTGCCATTGAGTCAATTTATTATGTGAAA(    | 41526 | A_95_P024451 | TA12436_4097 |
| 42628 | 502 | 43 | 819  | TATTAGTTTATGGTCTGTGAGATGTCACATGGGTTTCCCAGCATGGAGAATCCGGT/     | 41532 | A_95_P119837 | DV999447     |
| 42631 | 502 | 46 | 380  | GCATGTACTAGAAGTGAATTGCTAGAATTAACGATCTGTGTGTTTAGCTTTGTTTCA     | 41538 | A_95_P006046 | FS412805     |
| 42632 | 502 | 47 | 790  | AATATATTCCTGGCACGTGAAAACTTATTGAAATAAATTTGCTCAGCCATAGTTGTG     | 41540 | A_95_P187202 | TA14293_4097 |
| 42633 | 502 | 48 | 870  | TTAGTTTTGTTTTATCAACGCTGGGTACTCTATATATAGAGACATGTTTGGGGAATTG    | 41542 | A_95_P258546 | TA12203_4097 |
| 42634 | 502 | 49 | 475  | CCAGAAATCTTACCCTTAGATTTCTTCTATATGCTTCTTCTTACTGCTGATGATGTTG/   | 41544 | A_95_P001636 | TA21482_4097 |
| 42638 | 502 | 53 | 562  | ACGAGGGCCAGTTTTCTGTCAAAGCCCTCTTTGCTTAAATCTACTGATTATTATCTC'    | 41552 | A_95_P138937 | FG623478     |
| 42639 | 502 | 54 | 962  | GGGATATTTCTGAGGCCAAAATATCTATTTTATGATCGTAGACTGTTATGTTTCGATGAG/ | 41554 | A_95_P014396 | TC45811      |
| 42641 | 502 | 56 | 193  | GGAGGGTAGAGAAGGGGAGAAAGAAAGCAAAGGGCATCTCTCATATTTTCTTGATA      | 41558 | A_95_P037961 | BP129142     |
| 42642 | 502 | 57 | 283  | GCACGCAATTGTCATTTGAATAGATCTATCTTTAAGTTTCTCTCCTGATCATCTTCA(    | 41560 | A_95_P047911 | BP131775     |
| 42643 | 502 | 58 | 1181 | GGGTAATGTAGAGTTAATGTCCACAATTGTTTTATTGATGTAAAAGTAACTGTGGC(     | 41562 | A_95_P189867 | TA14879_4097 |

|       |     |    |      |                                                             |       |              |              |
|-------|-----|----|------|-------------------------------------------------------------|-------|--------------|--------------|
| 42647 | 502 | 62 | 93   | CTTTCTTTGGAGTGATCTTGTAACTTATTCTCTTGGGGTATTTGTGACTATTTACTGT  | 41570 | A_95_P138977 | EB442685     |
| 42654 | 502 | 69 | 686  | CTGTGTGTGCTTAAGATGTGATAGTTCTGGGTACTTGCATGTCCAATTATTATTTGG   | 41584 | A_95_P121707 | DW001811     |
| 42655 | 502 | 70 | 449  | TAGATTGGTGGTGTATAGATACTCATGAACCTCAGTGACACCCCGATTTGGGTTCCAA  | 41586 | A_95_P271791 | AM839972     |
| 42657 | 502 | 72 | 461  | TTGGATAACTAGATTTGCAGGTGCACTTGGCTGCAAAAAAGGAAAGGCTTGTAATA    | 41590 | A_95_P176322 | U95924       |
| 42663 | 502 | 78 | 753  | ATCAATCCCCTGAACTCGATCAGAAATCCCCTTGTGAGTGGACCTTCTTTTGAAGG    | 17966 | A_95_P000116 | FG157904     |
| 42674 | 503 | 4  | 585  | TCGCTCTGAAAAATTGCCTCAGTAAGTCATACTAGTACAATGTTATGTTAGCTTCTTT  | 41616 | A_95_P053776 | BP133272     |
| 42675 | 503 | 5  | 632  | AACCAGGTGATTGGAATTGATTGCTCTCCCAATCCCTGCTGCCAGCTATTGTTGAAC   | 41618 | A_95_P127987 | FG132900     |
| 42676 | 503 | 6  | 314  | GTGGCTTTGCTCATTGTCAGTGTGACTATTAAGTAGTCGATATTTATGTTTCTTAA    | 41620 | A_95_P050986 | BP132534     |
| 42678 | 503 | 8  | 563  | GATGTGGGGCACTCAGTACAGTCTGGAATTTACTTCTACACACCCGAATCTAG       | 41624 | A_95_P157772 | EH615809     |
| 42679 | 503 | 9  | 774  | AAGCAGTATATCCTCGCATAACCAATCTTTCTACGGCGTCACTTGAAAATCCTGCTGT  | 41626 | A_95_P129877 | DW000183     |
| 42686 | 503 | 16 | 853  | GCTGCTGTGGCAGTGAAGTTGAATAGTTTTGCTTTTGAATTTAATCTTAGACTTGAC   | 41640 | A_95_P039176 | TA16262_4097 |
| 42687 | 503 | 17 | 459  | ATCAGCTTGATTAAGTCTACATGGGATTTCAAGTTATAATTTGGAAGTGGCATT      | 41642 | A_95_P132632 | EB433185     |
| 42689 | 503 | 19 | 543  | ACTGCTACTGTTAATTCTGCTACTGTTAATGCTGACTGTTAAGTGTAAATTCTGCTACT | 41646 | A_95_P223107 | TA22178_4097 |
| 42695 | 503 | 25 | 803  | GACGATAGTGAATATAGGTCCATTGATAGATCTCCGAATCTCAGTTCCTCGAAACCT   | 41658 | A_95_P119212 | DV162283     |
| 42696 | 503 | 26 | 352  | TGAAATCGCCTGTGATCTGAAAGAATGTAATCAAACCCGTGATACCCGAGAAGTA     | 41660 | A_95_P141592 | EB429936     |
| 42700 | 503 | 30 | 816  | GAGTTGATGAAGTGTCTGGACCTGTAATGTACTTACTGTATTACTGTAATACATATGA  | 41668 | A_95_P244337 | EB429106     |
| 42703 | 503 | 33 | 594  | TATTTATTTGTTTGGTTTCTGTATACAAAATAAGAGATACAGAAGACCATGCGG      | 41674 | A_95_P030866 | DW001385     |
| 42706 | 503 | 36 | 341  | ATCTTTACTCAAATTTTACGCGGCTTGTCTGGTGCCAAAGTCACTAAACCGGGGAAG   | 41680 | A_95_P018046 | EB682350     |
| 42720 | 503 | 50 | 1101 | GTGGCTATGTATAAGACGATCGATGTTATATGTTGCTCTAATTTGACTATTAAGAGTC  | 41707 | A_95_P019591 | TA15680_4097 |
| 42721 | 503 | 51 | 883  | CAGTCTCGAGTGGTAATATATGTTTTGGTGAAGAAGTGGAGAAAAGAAAAGTAAG     | 41709 | A_95_P263116 | EB424976     |
| 42722 | 503 | 52 | 672  | TTTTAGTAAAAGTGTGTTAAGCTCATGTCGCTCTTGTCTGCTATGGATCCTCCGGA    | 41711 | A_95_P150997 | EB681180     |
| 42726 | 503 | 56 | 2814 | AAGAATTGACAAAAATTACAAAAGTGAAGTTAGCGACTAATCTAGGGCGGGTAAACC   | 41719 | A_95_P239564 | AB196790     |
| 42733 | 503 | 63 | 799  | GTTTGCCAGTTTACCTGAGCCTTTCTAGTTTTTCCAATTTGCCTGGCTTGTGGTT     | 41733 | A_95_P010856 | EB677495     |
| 42736 | 503 | 66 | 286  | GACGAGTTAAATGAACTGGAAGCTAGCCTTTCAAAAACATCGTTACAAATCAATGAA   | 41739 | A_95_P095153 | BP533043     |
| 42737 | 503 | 67 | 860  | CCGGCATTCTGCAATGCAATCTAGTTTTCCATTCGTAATCATATTATGTATATACATCG | 41741 | A_95_P009556 | DV162646     |
| 42741 | 503 | 71 | 520  | CATACAAGAGACCCGAGATCTGAAAGTTTCGGCTCTAGATTTTACTGGATCTGATCG   | 41749 | A_95_P045986 | BP131279     |
| 42743 | 503 | 73 | 274  | CAATTGGTTGGGACAAGGTAGGAAAAAGCTTGATAGATTGTATCTTTACAGATCAA    | 41753 | A_95_P033659 | AJ632883     |
| 42745 | 503 | 75 | 736  | TCAATTTCTCCTGTACCCTTAAATTGTTGCAATTATGTGTCCAAGTTAAACGTCAAGG  | 41757 | A_95_P140917 | EB444726     |
| 42751 | 503 | 81 | 247  | TAGGGGATTGGGAATGAATCAATCTGGTCTTGTCTTTTGAAGGTAACCAATAAT      | 41768 | A_95_P033429 | AJ632731     |
| 42757 | 504 | 2  | 533  | CTTGTACTGTGCTATTGTCTCCACCATTAATACATATAGTGTGCTAGCAGATTTCTT   | 41613 | A_95_P059665 | BP134796     |
| 42765 | 504 | 10 | 785  | TAATAAAAACAGACCGACTCTGGTTGCAATGATGATTTATTTCTGTTGTGAAACCTG   | 41629 | A_95_P248762 | EB677818     |
| 42766 | 504 | 11 | 295  | AGGAAAATTGTTGACTGAGGATAAATCTTTTCAACAAGTGTGTATAGCATATTTGCTC  | 41631 | A_95_P033449 | AJ632753     |
| 42767 | 504 | 12 | 816  | GTCAAAGTCTGTCGTAGTGTAGTTGAGTCTATCAGGTCTTTTATTATCGCACTTCTTA  | 41633 | A_95_P194472 | TA15904_4097 |
| 42770 | 504 | 15 | 895  | CCTGCCATATATATGCTCTAAGAGGTTGGATCATGGTGTCTTATTAGTGGGTTATGC   | 41639 | A_95_P009136 | EB678171     |

|       |     |    |      |                                                             |       |                           |
|-------|-----|----|------|-------------------------------------------------------------|-------|---------------------------|
| 42772 | 504 | 17 | 353  | CAAGACCATTTAAAAACGTGTCACCTTTTGTCTTACTAAAGGACGACGACTTAGT     | 41643 | A_95_P150627 EB680762     |
| 42775 | 504 | 20 | 654  | AATACAGACCATACAGCCATGCTAAAAATTTTACAAGAAGTTGAGCTTGTGATGAGG   | 41649 | A_95_P216662 TA20754_4097 |
| 42785 | 504 | 30 | 523  | TTTCTCTTTTCGCATCTCCTTTTCGTGTGCCTTACATGCTATTGAAGAATGTCATTGGA | 41669 | A_95_P069670 BP137451     |
| 42786 | 504 | 31 | 107  | AAGCAACGAATCGGATTCCAAAAATTAGGTTTCGATTACCTAAAAAGCTCAATTCGCC  | 41671 | A_95_P215242 TA20442_4097 |
| 42787 | 504 | 32 | 195  | AAATTTGCGCTGAGGCACAAGCCTTGATTCTGTATATGCTCAGTCTTCTTCTGATGGC  | 41673 | A_95_P113522 CV021173     |
| 42791 | 504 | 36 | 844  | CGACTTCATGAAGAAAGTTCCTGAAACACAAGTGCAAGCTACATAAAGCTCAATGT    | 41681 | A_95_P232404 EB678937     |
| 42794 | 504 | 39 | 70   | GCGGCTAGTTTTTAAAAATTTGGCCCTGTTTTTTGTTGGATTAATACAGTCTCTGAGA  | 41686 | A_95_P235709 EB446851     |
| 42797 | 504 | 42 | 1192 | ATGTAATGCTGATTTGCAAACAGTTTGAACGGCTGGACGCTGGCAACTGTGGAAGG    | 41692 | A_95_P283483 EU161633     |
| 42798 | 504 | 43 | 744  | CCTCGTCTTATTGGCGCAATGGCTTATTCATAGTAAATGATCATGTCTTTATACTGTT  | 41694 | A_95_P192687 TA15507_4097 |
| 42800 | 504 | 45 | 784  | AACTGCTCAAGGATCTTAAGCTACTGTTTTTAACTTTCTTCTTCAAAGTCTCCTGT    | 41698 | A_95_P262821 DW004791     |
| 42801 | 504 | 46 | 746  | GTTTATTTATTGCTACAAAAATGTAGAATTTGTTACCCTTTCCTTCAAAGTCTCCTGT  | 41700 | A_95_P189127 TA14724_4097 |
| 42805 | 504 | 50 | 427  | AGAAGTCTAAGTCCAAATCCTCTCTCTCCAATCTGTTGATTACTAAAGAGGAAGGGT   | 41708 | A_95_P176012 EH666226     |
| 42810 | 504 | 55 | 146  | ATTCCATCTTTGGCCCACTTGAGAGGAAACCAAGTAACTTCAACAGGAAATTGAGTT   | 41718 | A_95_P090208 BP530859     |
| 42811 | 504 | 56 | 817  | CCATATACAATGATGAAGTTTGCCTCTTTGAGACTATTGTGGAGATGATCTACAAG    | 41720 | A_95_P012351 TA12330_4097 |
| 42812 | 504 | 57 | 502  | TCAGGATTGGGGCATAGTTGTTGAACATAATGAAATTTGTGCATATCAAGGGCCTT    | 41722 | A_95_P033579 AJ632852     |
| 42817 | 504 | 62 | 744  | TAACTTACTGCTGCAACTTTACCACCTGTCTGAGAAGTATATACTGTAGGTTTCGCGT  | 41732 | A_95_P201142 TA17361_4097 |
| 42825 | 504 | 70 | 1164 | ATATTCTCGAAGGAGGTCGTTTCGTCGAATCGAGATCGGCTCTGGTGGTTATTTTTTA  | 41748 | A_95_P015581 TA17510_4097 |
| 42826 | 504 | 71 | 324  | CCTATTGGTGGGTGAACAATCCAACACTTGGTGAATTCTGCTTACAATGATAGGAA    | 41750 | A_95_P091428 TA12368_4097 |
| 42833 | 504 | 78 | 241  | GCTAATTTTGCTCATGGAACCTTTTTCTGTACGACTATTCAGCTGTGCTTTGCTTAA   | 41764 | A_95_P002711 EH621391     |
| 42835 | 504 | 80 | 400  | TCATTTGATGTTTATATGCGTGATTTGAGGCCTCGAGTAGGTCCTATTAGTTTATG    | 41767 | A_95_P094533 BP532765     |
| 42843 | 505 | 3  | 731  | TGGCATTAAATTTTGTGGGAAGGCAGAGGACAGTGTTAAAAGTGTGTTTGGAGTTT    | 41775 | A_95_P285953 EB445825     |
| 42845 | 505 | 5  | 504  | TGCTGCATTGGCTGATTTTTGGTTGAAAAATGGCGATCGGAGATAGAAGGCAACATT   | 41779 | A_95_P275878 AM788334     |
| 42848 | 505 | 8  | 177  | GTCATACTACTTCATTTAAAATGCTAATGAATAAGGCTTCGTAGCTGAAGGTCTAAAG  | 41785 | A_95_P129842 EB429794     |
| 42850 | 505 | 10 | 1026 | TCATAGACCAAGATATGGTTTTTGCAGCTATTTATTATAGACCAAGATACATCTACTG  | 41789 | A_95_P177182 TA11901_4097 |
| 42853 | 505 | 13 | 803  | CCGAAACCCTGCCACCAAGAAAAAGGATTTAGTTTTAAGTTGTAAGTGAATTTAAC    | 41795 | A_95_P296658 EB678639     |
| 42855 | 505 | 15 | 802  | CCATTCGTGGACGCCATCCAATTAGCGTTTTTCTCCATATGCTGAAAAACTCCTCGAC  | 41799 | A_95_P010666 EB425633     |
| 42858 | 505 | 18 | 488  | GCTATGAACTGAACATTTTCTGCTCTCTGTTAACATTGTCAATACAGAGGATAAAGAA  | 41805 | A_95_P003051 EH620495     |
| 42859 | 505 | 19 | 1297 | TTCATGACCAAAGAGTACCACATCTACATGACATCAGATGGACGCATCAGTATGGCA   | 41807 | A_95_P023461 TA15086_4097 |
| 42864 | 505 | 24 | 504  | ACTGCTGCTCATTGCATCTATAACTAGGTAGGATCCTTTCTGTATATAAACACAATTA  | 41817 | A_95_P123847 DW003734     |
| 42867 | 505 | 27 | 1844 | TCTTCACCATCAGACGAGTCAGAAAGATGTAGTGAAGATTTTTGTGCATCATCTTAA   | 41822 | A_95_P214537 AB023572     |
| 42870 | 505 | 30 | 279  | TGACTGCTTCTGTGCGAAAACTATTTATCAGTGTATGGATTACAGGATTATCAAATG   | 41828 | A_95_P188107 AM799412     |
| 42871 | 505 | 31 | 677  | AGGTTGGGTTATATTGTGCTGATATTGGGATTCGCTAATTATAACAATTAGCTAGTGC  | 41830 | A_95_P290998 FG635425     |
| 42872 | 505 | 32 | 482  | ATGTTGATTATGATCCACTTGATACCTTAAGCCCTCAGCTCGGCCAACAGACCTAAC   | 41832 | A_95_P277483 AM786721     |
| 42875 | 505 | 35 | 313  | TGTGTGGTTATTTGTGCTAATGCTGCAGTAACTCTTCAAGTTTGGTCTTATGAGGTA   | 41838 | A_95_P095778 BP533336     |

|       |     |    |      |                                                             |       |                           |
|-------|-----|----|------|-------------------------------------------------------------|-------|---------------------------|
| 42880 | 505 | 40 | 685  | TCAGAGCAGGACGATTCTTATTGGATGCGCTAAAAGTTGTTTCTTCGGGGACAGTTG   | 41848 | A_95_P299863 FG182558     |
| 42882 | 505 | 42 | 737  | TTATGCCTTGCATCACCTGAATAAATATGCCCGAGACAAGATACCCTTCATAGGCGTC  | 41852 | A_95_P126697 EB426022     |
| 42885 | 505 | 45 | 783  | GCAGGCTGTTGATATTACGCTTGGACTTGCAATTGACAGTACTAAAGCAACTGGC     | 41858 | A_95_P027356 DW000734     |
| 42888 | 505 | 48 | 1033 | GGTGGTTACCTCATTAAATGGAGCTATTCATTACAGCTCTATCATGAGTTCTTTACAAI | 41864 | A_95_P205692 TA18343_4097 |
| 42890 | 505 | 50 | 483  | ACTGGTTTTCTATGTTGTTTCGACATCTAGAAAGAATAGGACGTACCGAGTTATGTT   | 41868 | A_95_P244132 FG644144     |
| 42892 | 505 | 52 | 1354 | GTTTGATTTATACCGAGTAAGTTGTCGGTAGGTATACCTGGTGAATCTGATATCTCA   | 41872 | A_95_P024406 TA16640_4097 |
| 42896 | 505 | 56 | 767  | GACTCTCTGATCAATATACTTCACAGCACACAGCTGTACAGTATGCTAGCATTATGGC  | 41880 | A_95_P290888 DW001774     |
| 42900 | 505 | 60 | 792  | CGGGTTAGCAAACGCAGTGTTCGAGGTAGAATTCAATATTATTTGCAAAGAACA      | 41888 | A_95_P013116 TA18258_4097 |
| 42902 | 505 | 62 | 1020 | TGATTTGAGTGAGTTTCTCGTGTTCCTTATTCTGACTCTCTACCATTTCTTGATGGG   | 41892 | A_95_P154217 EF051135     |
| 42903 | 505 | 63 | 556  | AGACGAAGAGATTTGTCGTCTTGAACGGGAGCTTTTTATAATGGGAAATATTTTGGAA  | 41894 | A_95_P301173 FG180856     |
| 42906 | 505 | 66 | 839  | TGTGACACCCCGATTCGGGCTGAGTTGGGATGGTTTTCTTGTCTATCACGTTTAT     | 41900 | A_95_P135597 EB425297     |
| 42907 | 505 | 67 | 517  | GTTGAGAAACTGAAGTCTGGTGTGTGAGGGATGATGATCCAGATTTCCGATGATCC    | 41902 | A_95_P222997 TA22151_4097 |
| 42909 | 505 | 69 | 553  | TCAGTATCTCCTTATAATATCAAATATGTGGAGTGGTTTTCTGCCATTTGCTTCTCTT  | 41906 | A_95_P018631 TA13260_4097 |
| 42913 | 505 | 73 | 256  | CATAAGGAGTTGGCCTTTAGAGTAACTACTAAGATGTATGTTACCAGAAAACGAACA   | 41914 | A_95_P132792 EB433504     |
| 42933 | 506 | 8  | 665  | GGTCGAAGTTGCATCCGACTAAAAAGGGCGATTTGGAATATGAAATTATGTTGTTTA   | 41786 | A_95_P027141 TA15716_4097 |
| 42934 | 506 | 9  | 846  | ATTGGGATCCTAATGCATTGCCTGAGATAAAAAGGATTAATTACCGCGATGTGGTGG   | 41788 | A_95_P244112 EB679225     |
| 42936 | 506 | 11 | 299  | AAGATGTGTCAGATTTTGAAAAGAGAGGGTGGGTGATTTTGTTGGTGCCGCCACA     | 41792 | A_95_P164792 TA18036_4097 |
| 42942 | 506 | 17 | 988  | ATTGTTGCAGAACTGTTCTCCCTTACTGTCTTGCTGCCTTGATGAACGGATATCC     | 41804 | A_95_P202452 TA17639_4097 |
| 42945 | 506 | 20 | 402  | AGGTGGCTACTATGTAACGTAGATTGGATAAGTACTTTGGATGCTTTTAAAAATAAG   | 41810 | A_95_P163112 EH622100     |
| 42946 | 506 | 21 | 314  | GCCGGCACAGCTCTTCATAGTGAATTTATAACCCCTTTTGTGTTTACAGTATTTTAA   | 41812 | A_95_P025641 TA16984_4097 |
| 42947 | 506 | 22 | 234  | AGATGGTGCCTTTTCGCTGTTGGAGTATGCCTATCCAGTATAAGGACTCAATTAATG   | 41814 | A_95_P032301 AB001553     |
| 42948 | 506 | 23 | 388  | TAACGACTATTACAGCCCGACAGTAGCTTCATCATGAAGAAACGGAACAACCTTGGAA  | 41816 | A_95_P146717 TA17708_4097 |
| 42954 | 506 | 29 | 631  | AAAGGGTGTGTCCATGACTGAATTTATTCACCCCGAGCAAGTACGAGAGCCCAT      | 41827 | A_95_P037901 BP129126     |
| 42962 | 506 | 37 | 280  | GACTCATGTGTCTGCTGTGTAATAACTATCTAATAACAGGAGATGTAAGTTTTGCTAGI | 41843 | A_95_P143847 EB447033     |
| 42964 | 506 | 39 | 777  | GAGGATTGCAATTGGACAGGCACCTGAGCAAGAACTTGAATTTTTCAACAACAGTTC   | 41847 | A_95_P222092 EB444939     |
| 42971 | 506 | 46 | 698  | CATGATCTTGGTTTATACTACTTGTACCTTGTGTGTTTGAATTTCAACCTCTGC      | 41861 | A_95_P018021 DV162334     |
| 42972 | 506 | 47 | 152  | TGGATTACAGATAACGTGCGTCAAGTGCAGTGCATCAGATTTATTGCCTACAAGCCT   | 41863 | A_95_P111077 CV020039     |
| 42973 | 506 | 48 | 434  | ACCTGCTGCTGCTTCTTGAGACTTATAGAAGGATTTGTGAGCCATGCCTTCTACTTT   | 41865 | A_95_P111407 CV020189     |
| 42975 | 506 | 50 | 507  | TGGAGGTTTCTGTTGAACAGCTTTGCTGAAGAGAGCTTGATATTTATTTGGCAGTTG   | 41869 | A_95_P121992 DW002063     |
| 42978 | 506 | 53 | 1156 | TGATAGTTCACGTGAACTTCTGGAAGAGAGCAGCAGATTTACTGGTGGATGTTGC     | 41875 | A_95_P221322 TA21796_4097 |
| 42981 | 506 | 56 | 2276 | GTAGATAGTTGAGACAACACCTTTGTACAGCAGTTCGTTACACTAATACATTTGATT   | 41881 | A_95_P142732 TA15408_4097 |
| 42982 | 506 | 57 | 365  | TTGGAATGATGAATGTCTGGGCTCTGTTTGTGACTGATGGAATTATCCTGCTTCTAA   | 41883 | A_95_P157692 BP534468     |
| 42986 | 506 | 61 | 747  | TAATGGAGGCAGCAACAAAATGTGGTGAGTACCTGTCTCTGTCAGTCAGTCATCAT    | 41891 | A_95_P019301 EB450257     |
| 42996 | 506 | 71 | 856  | GACACTGGATCACGTCAGATAACGGAAAAAATAATTGGATCGAGATTCATAACTATA   | 41911 | A_95_P089933 EB427992     |

|       |     |    |      |                                                             |       |              |              |
|-------|-----|----|------|-------------------------------------------------------------|-------|--------------|--------------|
| 42998 | 506 | 73 | 1672 | GAAAGTAAGACCAAATTGTGTTGAATAAGAGTATGGTTGGTGGTGTGGTATGATAT    | 41915 | A_95_P255244 | AY639864     |
| 42999 | 506 | 74 | 604  | TAGTATTGGATCTGTGGTTTGTACCCCTGCTGATCTTTTTCATTCCTTCTGTTGTTGTC | 41917 | A_95_P129642 | EB429605     |
| 43006 | 506 | 81 | 886  | GTTGTATGCCTTTGAACATTACAGGGCCTTGCCAATTGAATGACTTCTTTATTGAAGT  | 41931 | A_95_P023596 | TA15548_4097 |
| 43008 | 506 | 83 | 114  | GTCCGACAATCCTAAGATCTTAGTATTCAAGTCACTAGCCCTTACAGTTCAAGATTT   | 41935 | A_95_P147782 | EB643450     |
| 43016 | 507 | 6  | 335  | TCTGTACATTGTGTAGATTTATGTGCAGAGGGTGAAAATGCCAAATCATTGGTTTTT   | 41943 | A_95_P214012 | AM816159     |
| 43024 | 507 | 14 | 735  | GCCAAAGTTGATCACACGTCTGAAAATGTAATCCATATATTGAGATCCACTGGTTAT   | 41959 | A_95_P003866 | EB443493     |
| 43027 | 507 | 17 | 810  | CAGGATCTACAGAAACCATGAAAGTTAAGTTTTCCATGACACAAATCGACTGCACAC   | 41963 | A_95_P218332 | EB448847     |
| 43028 | 507 | 18 | 380  | CGATGTTCTTCAGGGTGCTAAACAAACGACAGATTTGTGAACCCATTTCCACCAAGTC  | 41965 | A_95_P103132 | CV016360     |
| 43031 | 507 | 21 | 498  | GCGATGAGTTGAAGATTTGACTTTCTTCTTGTCTGTTACTGGCTGAATTCTTTCTT    | 41971 | A_95_P000956 | FS411112     |
| 43035 | 507 | 25 | 798  | GGTGCACCAACTAATACATTTGCTTATTACTTCCACTGACGCTCAATATACAAGTCTTC | 41978 | A_95_P272346 | EB450818     |
| 43037 | 507 | 27 | 574  | TGAAACCGTTAGCAAACCTAGTGACAAATCAACCTCATCAGATGATTCTAGTAAAATC  | 41982 | A_95_P153897 | DV999293     |
| 43038 | 507 | 28 | 676  | AATTTCAAATCCGACGTTGACGGTTTCGAATATTCCCAGTTGTGTAGGATAGCGCA    | 41984 | A_95_P292258 | EB427017     |
| 43040 | 507 | 30 | 89   | TTAGTGAAGTATGGGCTCATGTGCTGCATGCAGTGCTCCGCGAGTAATGCCAATGAA   | 41988 | A_95_P114622 | CV021691     |
| 43043 | 507 | 33 | 385  | AATGGCCTTTAAGAATTGTTTGTATGGCAACTAGAAGTTGCCAGCAGTTATATTATGA  | 41994 | A_95_P063480 | BP135790     |
| 43050 | 507 | 40 | 217  | CCATTGGAGACAATAAGGACACATTTGATGGTTGGAAGTAGTGGGCATTCTTCTACT   | 42007 | A_95_P200177 | DV160992     |
| 43051 | 507 | 41 | 915  | CGCGGACATGTGCAGTTTTGGGCTTCGGGTTTGTAAATTCTTTGATTGCTTATTCCC   | 42009 | A_95_P269386 | EB449208     |
| 43053 | 507 | 43 | 789  | CAGAACTTCTAAGAACAAATCCAAGAAGAAAAGGGTGGGCGTACAGTTCAAGAA      | 42012 | A_95_P016631 | TC50971      |
| 43054 | 507 | 44 | 807  | GAGGTGATAACGTTGATGAAATCAAATCGAAGCTTGATGTAGCAAACAAGGCTGTT    | 42014 | A_95_P288993 | TA14249_4097 |
| 43056 | 507 | 46 | 183  | CATGTAGGCTAAAGCAAACGTACCATAGGTTCAAAGTGTCTAGTTCGTTCAAGTTC    | 42018 | A_95_P139672 | FG155763     |
| 43058 | 507 | 48 | 324  | CTTCTCTAAAGACAAAAATATGCTTTGCAATTGGCAACGGCAGTTTACTGTTGTTTT   | 42021 | A_95_P010076 | BP534433     |
| 43066 | 507 | 56 | 576  | TGGGTAAGTAAACAGTGTCTGGAAATCCGTTACTTTATATGACTATCTTTACTAATC   | 42036 | A_95_P063345 | BP135754     |
| 43068 | 507 | 58 | 1020 | ATACTTCTTCAGGGTAACGCAATCCCATCCAGAATTGTCATCATGGTCTGCAGGTAG   | 42040 | A_95_P186737 | TA14190_4097 |
| 43069 | 507 | 59 | 446  | TAATGGTAGATCCAATGCTGAAAGGGAACACCCAAAGAAGGGACTGTACCAAGCT     | 42042 | A_95_P052546 | BP132951     |
| 43072 | 507 | 62 | 734  | GCACTTGCTTGAAGCTTTGAATCCAAGTTTGAACCCTGAATTAGCAATTGCTTTT     | 42048 | A_95_P200817 | EB681013     |
| 43078 | 507 | 68 | 646  | CTGATCTTGACAGTGGGGGCAATATTCTTACAAATTTATTTCAATTTCAACCGTTAT   | 42060 | A_95_P288628 | FG643167     |
| 43082 | 507 | 72 | 434  | CAACTCTGAATCATATTTTGCATTATGATTGAAGTCTTTGCTTCTTTTGCCTGTTCC   | 42068 | A_95_P178652 | TA12304_4097 |
| 43085 | 507 | 75 | 853  | TGATCTTTTGTCAAGGGAAGTCCCTCCAGTTAACCTGTAAGAATGCCTTGTGGATTC   | 42073 | A_95_P266441 | DV157831     |
| 43087 | 507 | 77 | 247  | GTAAGGGCAAATTTTCCAAATGATTGTAATGTGAATATTTTCCCTGTTCCATGAAGA   | 42077 | A_95_P194217 | TA15845_4097 |
| 43089 | 507 | 79 | 1175 | AAGATCTATATTCTGGCGGAAAACATAAATAGTTTTGAGGAGAATGATTTCCAGA     | 42081 | A_95_P210227 | TA19354_4097 |
| 43092 | 507 | 82 | 236  | TAGCAAACAAGGACAAACCTGCAATCCTCAATGTCAACATCGGGACTACTGTGAAAG   | 42087 | A_95_P136927 | FG143157     |
| 43098 | 508 | 3  | 349  | GATAAGATGTAGGGCTCTTGTAACTGTGGACTAATGAGCACATGATTTTAGATGTCA   | 41938 | A_95_P113927 | CV021368     |
| 43099 | 508 | 4  | 813  | AAATTTTGGCATCTCGTGTCAAGTGTGTTAATTCTGTTCCACTATCCTATGACACTT   | 41940 | A_95_P267281 | EB681840     |
| 43103 | 508 | 8  | 479  | TTTGGCTTTGGTTCATTCTCTGTTAATGGTTGAATCATTTGAAGGTTGTGCTGGAA    | 41948 | A_95_P029101 | TA21080_4097 |
| 43117 | 508 | 22 | 388  | TCGGAAGACATATTCCCAAACATAACATCCTATTCCAGATAAATCATTATGGAAGGAC  | 41973 | A_95_P153577 | EB683819     |



|       |     |    |      |                                                             |       |                           |
|-------|-----|----|------|-------------------------------------------------------------|-------|---------------------------|
| 43120 | 508 | 25 | 776  | GTTGGAGCAAGCTGACCTGATCCGGATGAAATTGAGCTTAGCACAATAATATAAAG/   | 41979 | A_95_P289608 DV160210     |
| 43124 | 508 | 29 | 349  | GTTGCCAGCTTTACCTTTTTATATGTATCACCATGCAATATTAGCACCCCTTACTTTA/ | 41987 | A_95_P081405 BP528243     |
| 43126 | 508 | 31 | 1825 | TCCTGGGATGTGGGAGAGGCCCTTATGAGGAAAACAAAATAATGTCGTAAAAGAAAA   | 41991 | A_95_P024981 AB017967     |
| 43127 | 508 | 32 | 906  | TGCTATGGAAACAGGACAGTTTGAGAGGACTGTTATAATTGCAGAGGAAGGGAGTT    | 41993 | A_95_P233659 EB441391     |
| 43129 | 508 | 34 | 464  | ACAAACTCCTTACACAGATCAAGGATGGGTAAGCTGAGGGAAAAGAAGCTTGCATG    | 41997 | A_95_P114557 CV021663     |
| 43136 | 508 | 41 | 519  | CCCACCTAGTGGTTAAGACATATATATACTTTTCAGTGAAGATGGAACAAATGCCTG/  | 42010 | A_95_P022681 EH621211     |
| 43138 | 508 | 43 | 574  | GTGCTCTTTTCAGGGTCTCAGGATACTTGATGTCTGATAAACTTGAGATTCCTCGGT   | 42013 | A_95_P047106 BP131572     |
| 43141 | 508 | 46 | 700  | AAAGATGACGCACAATTATCCAGTGGAGGAGTCGTGCAAAATTGCAGCAGCAGTAG    | 42019 | A_95_P191662 EB441414     |
| 43150 | 508 | 55 | 804  | TTTGATGATTAGCCGTTGGAAGCCTGAGAAGGCAAGAAAGTGAGCCACAAGAAGG     | 42035 | A_95_P260851 EB451879     |
| 43153 | 508 | 58 | 587  | AGGGTGGTTAATTAAGTTCAGCAGTGAATAATACGTTTCTGCTTTTGGAAATATTGTT  | 42041 | A_95_P153182 EB683490     |
| 43158 | 508 | 63 | 629  | ATTTATGGCCAAGCATGGAAATACAAGACAAAGACAATGGTTCGTGCGATAAAGCT/   | 42051 | A_95_P128977 FG643286     |
| 43169 | 508 | 74 | 922  | CGTACTGTATCATGTCAAAGACTGTTTATTTTCGCATGGAAAAGGAAGATATTTTCAG  | 42072 | A_95_P220977 TA21723_4097 |
| 43172 | 508 | 77 | 907  | CAGGGCCTTGGCAATTGAATGACTTCTTTATTGAAGTTAAAGAAGTTGCATTTCCCGA  | 42078 | A_95_P192867 TA15548_4097 |
| 43177 | 508 | 82 | 96   | AATAGAACTTAGCATGCATCAAGCTATGGGTTTAGAGAAAATCATCTTTTGGTTGAG   | 42088 | A_95_P119152 DV162228     |
| 43178 | 508 | 83 | 701  | TGATTATCCAAAGAGGACTTATGACCGTGAATCTCGGAGAACCTCTGATCATGAATC   | 42090 | A_95_P136422 EB440185     |
| 43185 | 509 | 5  | 809  | GTTCTGGTTTTGAAGTTTGTGTGTGGTCAAAGCTGGTGATAAAATATCAAACAGGA/   | 42094 | A_95_P236639 DV158457     |
| 43188 | 509 | 8  | 524  | AATTGTACTCAGCTTGAAAAGAAAAGAAGCCTCAAGTTGATAACGTCATCATGTTCC/  | 42100 | A_95_P021501 TA20971_4097 |
| 43197 | 509 | 17 | 589  | TCTCTTTCATGTTAGGTTAGCTACTATGTAACATTTTTCTGATGGCAGAATCAGTTAG/ | 42118 | A_95_P134457 EB436785     |
| 43208 | 509 | 28 | 469  | CAATGGAAAACATAAAATGGAGGGTTCCACTGTCCCTTGGTAGTCAAATGGGCAG/    | 42137 | A_95_P136682 DV161271     |
| 43211 | 509 | 31 | 1321 | GCAGGTAGAAGGAATTAGAGTCTTCCCTGTTATCAAGGGTCTGTAGTGCTGGATTT    | 42143 | A_95_P211687 TA19669_4097 |
| 43215 | 509 | 35 | 848  | AGCTATATGGTGAATCTGCACATGTGCTGGCTAATCGTCCTCTGTATCATCTAAAGCC  | 42151 | A_95_P230749 DV157786     |
| 43217 | 509 | 37 | 267  | GCCATAATGTATGAAATTTGCTTGTCCGGAGTCTTAGCTGACATGTAATAAAACGTTA  | 42155 | A_95_P131682 EB432060     |
| 43220 | 509 | 40 | 254  | AAGGCGGTGTTATAGGATGATTGGAGGTGTTCTTGTAGAGAGAAGCTATCACGGAAG   | 42161 | A_95_P105062 EB678453     |
| 43223 | 509 | 43 | 712  | CGATGTGACCCAATTTTATTCTTCCCTGTGAATCTATTCATCGTTCAGTTTCTGATG   | 42167 | A_95_P297813 FG637808     |
| 43225 | 509 | 45 | 669  | CTTGCAACTAATTTATCCCTTTCCACAGTTCATGTATTTAAGGAGGTCTCAGTT      | 42171 | A_95_P128462 EB428168     |
| 43227 | 509 | 47 | 851  | AAGTCAGATAATAACCAAGTGCCTTTGGGTCTATTAATACTACTACTACTCGTTT     | 42175 | A_95_P013656 EB438344     |
| 43232 | 509 | 52 | 722  | CGCAAAATGGGATATGGAGAAGGCTTAAATGGCTCTCTCAATACATTAATAACAG     | 42185 | A_95_P177642 EB683024     |
| 43236 | 509 | 56 | 721  | GGGAAACTTGGTGTCTCAGTTACTAATAAGTAGGATTATATGTTCTTTAGGAACCTT   | 42193 | A_95_P256799 EH622195     |
| 43240 | 509 | 60 | 1327 | CTGGGCCGATATTGTTACTATGCGTACTTCATACATTTTGACAGTGACATTTTCATTC  | 42201 | A_95_P003411 TA12011_4097 |
| 43245 | 509 | 65 | 811  | TCCCCAGACCCCACTTGTGAGAGTATACCGGGTTTATTGCTGTTGTAATTGATGCTAG  | 42211 | A_95_P291478 TA21465_4097 |
| 43247 | 509 | 67 | 338  | TTTGACTGCGCCAATCTGTAATAAGTACTTCTGATGGATCAGGTGATCACCAC       | 42215 | A_95_P164432 FG151495     |
| 43250 | 509 | 70 | 3272 | TGCAATCATCTGTTTGTGTTGGACCATGTATGCAATTACCATGGTACCCGGATCC     | 42220 | A_95_P011806 AB041352     |
| 43253 | 509 | 73 | 789  | TATCTTCTCCAGCCTTGTCTAGGTGGTGACTCGAAGACATTGATGTTTGTCAATGTCG  | 42226 | A_95_P266131 EB450896     |
| 43254 | 509 | 74 | 606  | GTTATGTTGATTAGGATACTTTCTGTTAGGTTTCATGTATGAAGTAGAGCATAGGATG  | 42228 | A_95_P219432 BP129744     |

|       |     |    |      |                                                              |       |                           |
|-------|-----|----|------|--------------------------------------------------------------|-------|---------------------------|
| 43255 | 509 | 75 | 961  | TTTTCTTCCTTTATGAATATCATTGTCGCTAGACGGTCTTTCTAGTTGGCTGGTATT    | 42230 | A_95_P184612 TA13732_4097 |
| 43256 | 509 | 76 | 755  | CCTGAATTCGGTATTGTGAACCTATGACGTGTTGAACTTTTTGTTTTGTATTCCAAGT   | 6784  | A_95_P000061 DW000215     |
| 43268 | 510 | 3  | 614  | AAGTCTGTGATCTTTTGAACAGTGCTGGCATGTTATCCTGGCTATTCTGGTGCACGCA   | 42091 | A_95_P044166 BP130805     |
| 43269 | 510 | 4  | 302  | GCAACAGTTAGTCAGGCACTAAATTGAAGGAAAGCCTGTAATGTCCTTTTAATTTA     | 42093 | A_95_P008801 CV016523     |
| 43272 | 510 | 7  | 856  | TATGACTGGTGGCCAGATGTTACACTATGCATGATGCAGAGCTCATGTTGATTGATC    | 42099 | A_95_P287958 FG167284     |
| 43273 | 510 | 8  | 1547 | GTTTTCTGTTCATAGGACACTTGGAAATTTGTTTCATCAAATTTTACCAGCATATAC    | 42101 | A_95_P187612 TA14385_4097 |
| 43282 | 510 | 17 | 883  | TAAGCGTGATACCTATCTCCTTCAGGAGGGTTAGATTGATGAAGAATTTATAGTTTT    | 42119 | A_95_P213457 TA20052_4097 |
| 43284 | 510 | 19 | 516  | ACAAGTCCAAGTCTCTGCTGATTCCCAGTTTACACTTAACAATGTGAATTTCTTGATC   | 42122 | A_95_P102862 CV016239     |
| 43285 | 510 | 20 | 544  | AATTGCTTGACGCATTATGCTTCTGTAAAGGTCTTGAATTTAATGCTTTTTGGACCT    | 42124 | A_95_P005976 TA13055_4097 |
| 43287 | 510 | 22 | 245  | TTGTACCTGTAAATGGGGGGAACGGACAATTAGTGCAAATTTGGAAGGGGAAA        | 42127 | A_95_P029751 EB437829     |
| 43290 | 510 | 25 | 833  | GTGCCACAGGGGATTACCAACTACAGACAGTTGGTTTTCTCCTAAAATCCTTAGTGA    | 42132 | A_95_P216777 EB441412     |
| 43295 | 510 | 30 | 370  | ATCTTACCGATCTTCCGTTGTATACCAGATTGGATTGTTATGTAAAGAGAGAAGGTTT   | 42142 | A_95_P180432 TA12744_4097 |
| 43297 | 510 | 32 | 190  | TTAGATTCCGTTGGATGGTTTAGTGATGTAGCTGGTCAAGTTAAATTTAGAGGGAAA    | 42146 | A_95_P164392 EH623619     |
| 43300 | 510 | 35 | 668  | CTCCCTTCGGAATTCGGATGAGCCAATTGGAAAATTTTAAAGTTTCTTTAAGGATATC   | 42152 | A_95_P149157 EB678854     |
| 43304 | 510 | 39 | 868  | GCAGGTATTCTTTGTACAGTTGAACTGCTGCATTTTTCAGTCCACTTGTCTTTGTTCTG  | 42160 | A_95_P200327 TA17184_4097 |
| 43311 | 510 | 46 | 1244 | CACAAAGTAGTGTAAGTGTATATTTGCGTTTGGTGAATGCATGAATTTGACTGTG      | 42174 | A_95_P026271 TA17612_4097 |
| 43313 | 510 | 48 | 889  | GCTGACATTTTGTCTCCTAATAATAATCAGATTGGTGCATCATACTATAATGAGGTAG   | 42178 | A_95_P011711 TA15348_4097 |
| 43315 | 510 | 50 | 175  | GGCCGTGAGGAGAAGAATCAGGGGATTACATATTTAACTTAAGATTGTTAAAAG/      | 42182 | A_95_P208907 BP534683     |
| 43316 | 510 | 51 | 439  | AGTGCATTAAGTTCATGTCCACATGTAAGCTGGCTAAATTTGACTGTGAGGGCAGAG    | 42184 | A_95_P067300 BP136833     |
| 43323 | 510 | 58 | 762  | CCATGTGGAGAGTTGATGTTTAGTGTGAGAACAGAAAATTTTATGTATGGTATTGACAA  | 42198 | A_95_P207612 EB681605     |
| 43324 | 510 | 59 | 642  | AACTTGATTTATTGTACTTTGTATGAGTTGCAACAGTGTCCATTTGTAGTGCATCCTG   | 42200 | A_95_P130628 EB445989     |
| 43328 | 510 | 63 | 874  | CCTGTCTAGAATGCAGCCCCATTTGTTGATAAACACTTTAAAGTTAATTTTAGAGGTT   | 42208 | A_95_P204792 EB424701     |
| 43332 | 510 | 67 | 2679 | ACATTGTTGTACACATGTTGTTTCTATAGTTACTCGATTAGCTCAGGCACTTGGTGAA   | 42216 | A_95_P033216 AJ344534     |
| 43335 | 510 | 70 | 581  | ATTCTATCGGGCCTTTGGAAAGAATAAAGAATACAAAGTTGCAGTAAGTTTAAAGG     | 42221 | A_95_P018846 TA14369_4097 |
| 43340 | 510 | 75 | 1072 | GTATATGTATTTCTTAGTTGTCTTTGTGACTCCAGTCTTGTAAATGGCCTTAACCATTT  | 42231 | A_95_P223192 TA22197_4097 |
| 43342 | 510 | 77 | 896  | CGAGTGGTACAATATTTCTGTTTCGAGGCGTAATTAGCTCTGCCATTTTGTGTTG      | 42233 | A_95_P248517 EB446238     |
| 43345 | 510 | 80 | 1039 | TTTTATTGATTATTGGAGTCCAGACGATTTCCATGTTTCATAGGAAGCTTTCTCTTCC   | 42239 | A_95_P198247 TA16736_4097 |
| 43346 | 510 | 81 | 1087 | GTAAGAGGATGATATTACCACATAATAAGAGATCGAGAATCATATGCTACTCACTTC    | 42241 | A_95_P189587 TA14819_4097 |
| 43347 | 510 | 82 | 757  | GCTGCTGGGTGGAAATCGTTTTGTAACAATAGGAGGATTAAGTACTATAATGTTAT     | 42243 | A_95_P126847 EB426204     |
| 43357 | 511 | 7  | 715  | GTACCTGGTTTAGAGTATCATTCTACTGTTGGCCGGCTATCAAAGTGGGTTTG        | 42251 | A_95_P265866 FG637902     |
| 43359 | 511 | 9  | 782  | AGTAATTCACACCATCAGTTTGTGCTGCAGCGAATCCAAGTTTTACGTATTCTGCCAATT | 42255 | A_95_P135937 TA18135_4097 |
| 43366 | 511 | 16 | 436  | TCCAGGAAGTTGAGATTAGTGCCTAGAGGGCAAATTACACTGATATTTCCAATTT      | 42269 | A_95_P041401 BP130085     |
| 43367 | 511 | 17 | 713  | GTTATTTTAGGGTTATATACTCTGCATCAATTGGAGGAATGAGTACATTAACAGGG     | 42271 | A_95_P138802 EB438454     |
| 43371 | 511 | 21 | 521  | ATCAGCCTTGTAATCTAAGTCTTAGAGGCTCATGATTTGTTACTACCAATCTTTGGGA   | 42279 | A_95_P282483 AM801773     |

|       |     |    |      |                                                             |       |              |              |
|-------|-----|----|------|-------------------------------------------------------------|-------|--------------|--------------|
| 43375 | 511 | 25 | 880  | TCTCCCTTTTGATATTTCACTTCACTGGGTTTCTGGTCAAATTGCAGTTTTGCAA     | 42287 | A_95_P245997 | EB428320     |
| 43378 | 511 | 28 | 531  | TGGCACTGGAGGTTTTTCTTTTCTTTTATGGGGAAAATAACAAGCAACATGAGACA    | 42293 | A_95_P025251 | X82120       |
| 43380 | 511 | 30 | 845  | AGTCCCAGTTTTGTTTGGGAAGCACTTGTAGGTTGTATAATCGATTATTCGGATCCA   | 42297 | A_95_P290543 | DW000090     |
| 43382 | 511 | 32 | 274  | CTTTTCTCTCCCTTTGTTTCATGTGTTGATTGGTCCGTGAAGAATTGGATTCGTGG    | 42301 | A_95_P121232 | DW001254     |
| 43386 | 511 | 36 | 241  | CATAAACAAAAGATTATGTAACCTCATCTTTTCCCTCTGATTTCCCGGGCAGGTACT   | 42309 | A_95_P083115 | BP528678     |
| 43388 | 511 | 38 | 1191 | GGGATGCTGCGTCGTCAGTTGTTTACTCTTTAATTGACTCTATTTTTATGTCCATGTT  | 42313 | A_95_P000546 | AJ299256     |
| 43389 | 511 | 39 | 1046 | CAGTCAAACCTGGTATTGTGTAAGCTTGAGTTATTATAAGAAAATTTAGATGGGTGT   | 42315 | A_95_P010876 | AB119477     |
| 43390 | 511 | 40 | 152  | AGATTCCTCCAGATATTTTACGCGCCTTCAGACTTCTCGATTGCATTTGCGTCAGCAT  | 42317 | A_95_P104637 | CV017107     |
| 43391 | 511 | 41 | 493  | AGGAGGTCTTTGTGTATTGGCAGTTATGTAACAGTAGCTCATTGAATGCTGTA/      | 42319 | A_95_P307893 | FG639932     |
| 43396 | 511 | 46 | 1216 | ACCCATACGAGGAGTGAGCATATCTTTTCCAGGAAATTACAATTTGAGCATTAAAC    | 42329 | A_95_P214472 | TA20270_4097 |
| 43397 | 511 | 47 | 812  | GGAGTATGCTAATTATCCCCTCAGATTTTCACTGATGAAAATCCTCATGCTTGTCTC   | 42331 | A_95_P145447 | EB449196     |
| 43399 | 511 | 49 | 677  | GAAACAACCAACCAATGCATCCCACATGTCATTTATGCCGCAACAAGGGATGTATG    | 42335 | A_95_P138182 | EB441931     |
| 43400 | 511 | 50 | 383  | AGAATGAAGAGTTTGTATTTTTGACTTGTGAGAGAGGAGCTACACCACCTCTCCA     | 42337 | A_95_P304743 | FG637992     |
| 43406 | 511 | 56 | 4127 | GCTTAGGGAGTCCTAATCCTCATGTTGTATAGAGCTATATGTGTATATTGTACTTTAC  | 42348 | A_95_P009926 | U52078       |
| 43407 | 511 | 57 | 745  | GTTTGTTCGTTAGCAACTTGCTGGTGGCACATTTACTGTTATGATAGATTGATTAATA  | 42350 | A_95_P291038 | DW002249     |
| 43414 | 511 | 64 | 663  | CTCACCCCTACCATTGTGATCCGTTCTAAAGCTCCTTGCTTTTGATTACTTGTTTTC   | 42364 | A_95_P181197 | TA12922_4097 |
| 43416 | 511 | 66 | 882  | CGCTTTGGCTCTCAAGCCATAGACTTGTATCTTAAATCCATAGACATGAGGCATTGC   | 42368 | A_95_P009161 | AB286178     |
| 43419 | 511 | 69 | 1245 | GGGGTCTGTTGGTTCATGATTTAGAATTTGTGATGTTTCTGTTAGTTGTCATCATGT   | 42374 | A_95_P010476 | TA11987_4097 |
| 43421 | 511 | 71 | 1021 | GGGGACCAGTTTTGTATCTTAAACTGATTGTGCAACTTTCTTTTTGTGTTAATCTG    | 42378 | A_95_P011386 | TA15755_4097 |
| 43424 | 511 | 74 | 1426 | CCTGTGTTTAGAACTTCTTACTGTATCTGCTTATTGCTATCTTAGTGTGCAATAAG    | 42384 | A_95_P016201 | TA14791_4097 |
| 43428 | 511 | 78 | 896  | GTGTACTATTTCTGTTTTCTCTGACAGACTTGTGTCATTATTGAAGCTGCTTGTATC   | 42392 | A_95_P146172 | TA14739_4097 |
| 43432 | 511 | 82 | 102  | TAAGTGGGCCGGTCCCGGGCTAAACGGGCCCAACAGAAAATTTGTATTTTAAATTT    | 42400 | A_95_P147362 | EB451742     |
| 43444 | 512 | 9  | 654  | AATATTTCTGTTTCATATCTTTTCAAATGTATCGCTCTACCCCTACCCCTGCTATAGCC | 42256 | A_95_P204287 | TA18033_4097 |
| 43455 | 512 | 20 | 998  | CTTGCTAGTAGTAGATGGTTAGGCGTATCTGTTGTGCAAATTTCAAACAAAGTGAT/   | 42278 | A_95_P193032 | TA15584_4097 |
| 43456 | 512 | 21 | 255  | CGTGATACAGTAAAAATGTTTGGCGCAGTTCCAAGAAAACGAATGAAAATTTCTGAA   | 42280 | A_95_P089443 | BP530508     |
| 43463 | 512 | 28 | 130  | ATGGTTAGTTATAACTAATGAGACATTCCTCCGCTTTCCAGGCGAAAGTGAAGATAAA  | 42294 | A_95_P140427 | EB444336     |
| 43470 | 512 | 35 | 706  | CTTCAAATGATGTTGAAGTGAAGCAGATGGTTAACTGTTGTTGAAGTGAACAAACT    | 42308 | A_95_P186227 | TA14080_4097 |
| 43471 | 512 | 36 | 325  | CGGGCTCCGCTTTGTGTATTTTATGATGTTTCTACTTTCTTGTATGGCTTCCATGAT   | 42310 | A_95_P210797 | EB424986     |
| 43473 | 512 | 38 | 259  | TGCCATTTGTAGGAGGCACTTATATTGGACAATCCCATGGACTGTAGCTTTATGGTA/  | 42314 | A_95_P097148 | BP533896     |
| 43474 | 512 | 39 | 713  | GGTTCAGTTGAAAATATTATTTATGTTAATAATGAGAATTCGTTGCCCTTGTCAACA   | 42316 | A_95_P127032 | EB426449     |
| 43479 | 512 | 44 | 715  | CTGTGAGATGTTCTCTGTAATATTACATTTTCAATGCTAAATTGTGTGAGAGTCTGC/  | 42326 | A_95_P115587 | TA12160_4097 |
| 43482 | 512 | 47 | 897  | GAAGAAGCTATCTGGTGATGATGTTGGAGAATTCCTACTACAATTAATCCCGTTGA/   | 42332 | A_95_P250712 | EB451424     |
| 43484 | 512 | 49 | 896  | CCTCCGATTTGAGACCTCAAAATCAGATGGTAACTAACTTCGCTAGACCAGTACATC   | 42336 | A_95_P226409 | DV159465     |
| 43488 | 512 | 53 | 850  | ACGATTGTTGTGATGGCTCTATTTAGTATACATACAAATTTGGTGAATAATGGACCA   | 42343 | A_95_P011236 | DV158061     |

|       |     |    |      |                                                             |       |                           |
|-------|-----|----|------|-------------------------------------------------------------|-------|---------------------------|
| 43499 | 512 | 64 | 397  | TGGCATTTATAAATGTGCTTAAGCTTGGCTCTCAACAAAAAATCAGATAAAGCTGGG,  | 42365 | A_95_P092848 BP532013     |
| 43500 | 512 | 65 | 585  | TTCCGACGAAGACAGCCAAATATTTCTCTCTGACTGCATCGCTGTTATCTTCTTTAG   | 42367 | A_95_P206602 TA18553_4097 |
| 43504 | 512 | 69 | 681  | AAACCACATTCTAGATGGCACATTAATCTTAGGAGTAGCATCATTTGGCACTTTTAA   | 42375 | A_95_P115847 DV158226     |
| 43508 | 512 | 73 | 389  | CACGGGCCTTTTCTGGATTTATATTTTTGGACATGTTAAGAAAATAGTGGCATTCTC   | 42383 | A_95_P002316 FG643424     |
| 43509 | 512 | 74 | 1181 | TTGCACGCTTACTACTGCACCTGGTCGCCATTATATGCTTATGGACCATTACTTGGGA, | 42385 | A_95_P194697 TA15953_4097 |
| 43510 | 512 | 75 | 123  | GTGAGACACATATCTGGCTTTCTCGTTTTCTTTTCCACAAATTAAGTAAAAATTAAGC  | 42387 | A_95_P150927 EB681077     |
| 43515 | 512 | 80 | 794  | TTAACTGTCGTGAAGTGATCATCTATATGGACGAGAGCGAGAAACCTCCAGTTGGAC   | 42397 | A_95_P146057 EB449908     |
| 43530 | 513 | 10 | 546  | ACATCGGCTTGGTACAAGCGGAACTAAGGTCCATAGCAATGTTCAATCTTCAAATA    | 42414 | A_95_P123272 DW003141     |
| 43531 | 513 | 11 | 804  | AACAGCAAGGCAAGCAGATGAGCTACACTTTCCGTTGGTCAATCAGCAAGCACTGAA   | 42416 | A_95_P125807 TA15758_4097 |
| 43541 | 513 | 21 | 678  | ATGGAATTTTCATGAGCTCTACCTTGTTCATTATGTCATTACATTATTCAGCTCCTC   | 42434 | A_95_P019001 EH615127     |
| 43542 | 513 | 22 | 874  | CTTTTGATGTACCGCCCAAGGGACAAAAGTACATATCTTGTGCAAAAGCAAAAACAC   | 42436 | A_95_P019271 EB682461     |
| 43545 | 513 | 25 | 731  | TGGCGTATGAGGATGTTTTAGTTCTCATTTTGGCTATCAGATCAATTCCATCTTTTTG  | 42442 | A_95_P248972 TA14912_4097 |
| 43546 | 513 | 26 | 581  | GCATAAAAGCATTGTTGGGTTGATTCTGGTTTCTCAATAATGGGTTTGGATCGAGTT   | 42444 | A_95_P144437 EB447800     |
| 43547 | 513 | 27 | 785  | TCTCGACAAAGTCTCTGCATCTTTTCCAAGTCTTGTGGTTCAGGTGCAATAGAGGATC  | 42446 | A_95_P125867 EB424988     |
| 43551 | 513 | 31 | 565  | ATGGCCGCAACAACTTATAAAATTTGATTGGATTATCAGTCAAATACGTCTCCAAAT   | 42454 | A_95_P185692 DV160583     |
| 43553 | 513 | 33 | 817  | TTCGAGAGGTTGACTACTTCAGTGGAGATCTTCTTTATGTGAAAAGATCTATCATCC   | 42458 | A_95_P229734 FG166470     |
| 43556 | 513 | 36 | 1147 | ATTGTTTTCTATCAGACCGATCCACACATCTCCGATCTGCTCCAAAGGATGAATGAG   | 42464 | A_95_P011081 D26509       |
| 43558 | 513 | 38 | 1328 | ACGTGCTTAGAGATAAGGAGATCATCCAGCAACGAGAGGCTTCCCAAATTTAATCTG   | 42468 | A_95_P178237 TA12191_4097 |
| 43564 | 513 | 44 | 478  | GTGTACATATACAGTTCTTGTACATCAACCAATAAACCCCAAGCCCACTACAGGCTT   | 42479 | A_95_P153927 EB684087     |
| 43570 | 513 | 50 | 335  | CTGCCGTCGATATTATGAGTTCTGAAGTGCCAAATAAATGAATTGGATTGCTGCAAA   | 42491 | A_95_P308323 FG642078     |
| 43572 | 513 | 52 | 770  | AAAGAACCAATATATCCAGTTGGATTGTTATCTGGTTCATACCAAGCTTGTGAGGC    | 42495 | A_95_P298493 EH621931     |
| 43574 | 513 | 54 | 734  | CTGAGAAAAGAAAGGAGTTAGAAGATGAAGGCTACAGGATTCATGGGAGCTCTGG/    | 42498 | A_95_P017651 EB449886     |
| 43576 | 513 | 56 | 610  | GGCGTAATTTACCTTCACATTTCAAGTCACTCTTATTAATGCATCTCGGGAGAATA    | 42502 | A_95_P122962 DW002857     |
| 43580 | 513 | 60 | 273  | GTGATGATGAAGTATTTGGAGCAAATAATGAATATGGTTCTGCATGCTTTCCAAGAT   | 42509 | A_95_P159707 EH618154     |
| 43583 | 513 | 63 | 799  | GCGGTATATATGCTTATTTCTAAAGTAAGACTCTCACTAATGGAGTTACAGGGTAAA   | 42515 | A_95_P220492 TA21619_4097 |
| 43588 | 513 | 68 | 851  | TCTTGTCCAGGTTTCTAGTGAAACAGTAAAAGGAGTATTCTCTACTATATTGTCTAC   | 42524 | A_95_P125277 TA12032_4097 |
| 43595 | 513 | 75 | 901  | GGTTCAGCCTAAGCTTGCATCATGCTTCTTCTTTGTAACTAATTCTGCAAAGTTAA    | 42538 | A_95_P183722 EB428087     |
| 43597 | 513 | 77 | 750  | ATGTACTAGTTGATGTCAAGCAGTGTCAAGGCATAGTGTGTTGTTGGTTTCCAAGAG   | 42542 | A_95_P248827 EB681443     |
| 43601 | 513 | 81 | 697  | GTGGTGTGATTATGTGTCAAACCTTATCAGACTGCTTTGAAGTCTTGTATCATATCTC  | 42550 | A_95_P013831 TA18221_4097 |
| 43602 | 513 | 82 | 694  | CCATCAAAAGGAAGGAAATACAGCCCTTACCTGATGAAAGAAGTCCACAAGAGAG,    | 42552 | A_95_P137717 EB677939     |
| 43610 | 514 | 5  | 304  | AGAAACTGAGACAAGTACTACTTCATTGAGTACTGAACCAACAAAACAAGTGAGAA    | 42405 | A_95_P034898 BJ999155     |
| 43614 | 514 | 9  | 618  | CAACAAAGTGTAGAATAGCATTAAATGTCGTCCTCTCAAGAAAAAAGAGATGCTTT    | 42413 | A_95_P120817 EB677535     |
| 43617 | 514 | 12 | 1169 | AATTAGTTGGGCCGCAAACATGTGTTTGTCTGCTGTTCTCTTTGTTGCTACTGCTGT/  | 42418 | A_95_P015366 TA15691_4097 |
| 43619 | 514 | 14 | 890  | TGACCAGTTTGAAGTGATGGTGTGTTACCAGAGGAGAGGCCTATGGAATTCGTAC     | 42422 | A_95_P019351 DW000724     |

|       |     |    |      |                                                              |       |              |              |
|-------|-----|----|------|--------------------------------------------------------------|-------|--------------|--------------|
| 43621 | 514 | 16 | 739  | GTCTTGGATCTATGTATTGGTATTGAGAGTTAAACATGGTGTATATCGAGCAACACCT   | 42425 | A_95_P218392 | EB439521     |
| 43622 | 514 | 17 | 453  | AAGTCCCGAAGACTGAGTACTCAATTCCAGATGCTTCATCCATTCAAGCATTGATGTC   | 42427 | A_95_P127162 | FG195316     |
| 43623 | 514 | 18 | 275  | ACACTAAAGAGGGTTTTCCGACACTCTGAATTTCTCTTGACAACAGTATGCATTCTG    | 42429 | A_95_P054766 | BP133530     |
| 43626 | 514 | 21 | 476  | TTGATTAATAGTGTTCGGTTCTGAGAACTCGCATTGAAGGAGGTGCCAAAGCTGT      | 42435 | A_95_P097298 | BP533971     |
| 43627 | 514 | 22 | 262  | CATTGTAGGATTGTTTTGATTATTGCACTCTTCATAAATACATGAAAAGAGTGTGGGT   | 42437 | A_95_P130847 | EB430953     |
| 43631 | 514 | 26 | 826  | TTAGTGCCAAACTGACTGGTAGTTGGAGGTGACCAAGACAATTGTCTAACATATTCT    | 42445 | A_95_P018436 | DV157755     |
| 43641 | 514 | 36 | 247  | CTGTCATAGTCTGTTGGTTTCATTGTTTGGTTAAATTCGATTTCCGGCGAGGTTGTCC   | 42465 | A_95_P163067 | EH622075     |
| 43647 | 514 | 42 | 644  | TGTAATGTGTGGCCTACGCTGCATTGCCAATGAAATAATTTGTTTTACATGTTAGAG    | 42476 | A_95_P192247 | TA15410_4097 |
| 43652 | 514 | 47 | 816  | GAGCCGTACAGAGAAAGAAGTCAAAGCTGATTACGATACAATGAATACGTTCCAG      | 42486 | A_95_P243822 | EB682813     |
| 43653 | 514 | 48 | 1097 | CCCTGTGGAACATCTATCCCCTCTCCTAATTGGAGAATGTCACAACTTCATTAGGG     | 42488 | A_95_P190252 | TA14970_4097 |
| 43656 | 514 | 51 | 831  | CCATTTAATCAAACCTTTTCTCACTGAAGAAGTCCAAGTTGGTACTAGTTTTATGATCC  | 42494 | A_95_P218047 | TA21086_4097 |
| 43657 | 514 | 52 | 539  | CCTCAATTCTCCCTAAGCAAAGATATGCCTTTGTTCCGTGTTTAGGTTAATTATCAT    | 42496 | A_95_P213437 | TA20048_4097 |
| 43661 | 514 | 56 | 427  | GTGACACCCGAGGTCAGGCTTTTATTTCCGCATTTTGGTTTTGATTTTATATCTTTTT/  | 42503 | A_95_P275103 | TC71239      |
| 43665 | 514 | 60 | 432  | GTCTATTGTAGGGAAAACCTAGTTAATCCGAGATGATTGCTATCATTATTGCCTCTC    | 42510 | A_95_P201037 | TA17339_4097 |
| 43667 | 514 | 62 | 511  | CATGTAATTTTGAGGTTAATGACTCCTGTTTGGTGTAGTTTGTGCCTATTTTTGAGCCA  | 42514 | A_95_P000946 | TA13775_4097 |
| 43673 | 514 | 68 | 138  | GAAGCTCAGCCACCGAGATTTGTTAAACCTTCTATTCTTTCATTTGATTCCTTTTTCA   | 42525 | A_95_P094718 | BP532843     |
| 43674 | 514 | 69 | 397  | GCCTTTTATCCGAAATCTCCAGAAAGGAAAACCTATTGTAGCTTGAAATTTCTGTTGAT  | 42527 | A_95_P134677 | FG139988     |
| 43678 | 514 | 73 | 833  | TACAGATCCTGGACTTCTATTACCTCGGGCAATTTGAAATTTGGGCGGGGATGCTT     | 42535 | A_95_P310418 | FG155139     |
| 43680 | 514 | 75 | 814  | ATGCTGTCAAGAAATCTGTTATGGGACTATTGCGGCTGTAAAGTTAAAACAGCCCT     | 42539 | A_95_P216957 | DV999409     |
| 43685 | 514 | 80 | 533  | TTGTA AAAAGTTATTGCTATTGTGATGTTCTGAACCATGGATCTCTGAAAACAAGTTTC | 42549 | A_95_P150257 | EB680347     |
| 43686 | 514 | 81 | 936  | CACAGCTAGATCCTATGTTCTCTCTCCTTATACATGTCTCTAAAAAATTTGCCACAAC   | 42551 | A_95_P198472 | TA16784_4097 |
| 43696 | 515 | 6  | 903  | AATTGGAAGCGTCACAATTTCTGGTCACAAGTTCTTGGGATGTCCAATGCCTTGTTG/   | 42555 | A_95_P222867 | DV159323     |
| 43698 | 515 | 8  | 922  | TGTA AATTTGCTACATGATCTCTGTATGTTTTAGCCAATGTTTCAGATATCATCGT    | 42559 | A_95_P193262 | TA15633_4097 |
| 43703 | 515 | 13 | 768  | TTAGGAACAAGGACACAAGTTAGCCCTCTTTGTATCCACTTGGATTATGCCCTCGGAT   | 42569 | A_95_P157057 | EH615096     |
| 43708 | 515 | 18 | 404  | GTTTTTCATATCTCTATGTTGAAAAGGTGTGTTGGCGATCCTGCCAACAGCTTACTC    | 42579 | A_95_P064010 | BP135931     |
| 43712 | 515 | 22 | 628  | ATCGAATCATTAAATTTGATGATCTGTGAGCTGTGTTATTTGCCTCGGTTCTGCCAAAA  | 42586 | A_95_P244242 | EH615092     |
| 43714 | 515 | 24 | 195  | GAGCTTTAAGATGTGAATTTGTACGGTAAACATTGAAGTTCTCCTCCAGTGTTCAT     | 42589 | A_95_P092203 | BP531691     |
| 43719 | 515 | 29 | 1161 | CCTTGTGGTGACAGCTTTTTCACTGTTTGTGTTGTTAATAATATCCTGGTGACAGTTTT  | 42599 | A_95_P008376 | TA14854_4097 |
| 43722 | 515 | 32 | 451  | AATTTTGAAGTTTACACTTTACTGGTGCTGGTGGGAGTAAGCTTTTATCCCTTGTTCT   | 42605 | A_95_P174452 | EH665844     |
| 43723 | 515 | 33 | 296  | TTCTGGGGTGTACTTTGTTAGAGTGCAGTCTTTTGTATATAATTTGCTCAGATGTTCC   | 42607 | A_95_P133362 | EB434811     |
| 43724 | 515 | 34 | 1036 | CCTCTGCATACTGGTATTATGGATTGGTGTCTGATATTGAGATATCTATTGTTGGTT    | 42609 | A_95_P143712 | TA14032_4097 |
| 43725 | 515 | 35 | 672  | GGTGGATCGAACAGTTAAGATAACTGGGAATCTAACAAATAGATGTATTGAGAAAGGA   | 42611 | A_95_P225467 | FG643186     |
| 43726 | 515 | 36 | 1169 | GTGGTTGAGAGCTAATTCAAACCTGAAGTATCTTATCTCGATTTTGAAGTATATGTAC   | 42613 | A_95_P189552 | TA14812_4097 |
| 43736 | 515 | 46 | 719  | TTCCATCGCTTAGCATTTTCAAGCTGTCAAACAATCATATTTGAGATTTGTTCAAGGT   | 42631 | A_95_P154047 | EB684209     |

|       |     |    |      |                                                             |       |                           |
|-------|-----|----|------|-------------------------------------------------------------|-------|---------------------------|
| 43737 | 515 | 47 | 963  | CTATCCCTTGTTAACTCAAAAAAGGGTCCGATTTCTTCAATGGCTCTGACTTGTACCT  | 42633 | A_95_P011566 TA15971_4097 |
| 43740 | 515 | 50 | 610  | GTGTTTTCTTTTTTCAGCAGAACATGCTTAGTCTTATGAAGTTACTTTCTGGATGATG  | 42639 | A_95_P124247 DW004103     |
| 43751 | 515 | 61 | 861  | GGTGGCTTTGTCAATGGAACCATCATCACTACATTATCCTCATCTCTTCAACCTCGATC | 42661 | A_95_P115557 DV157809     |
| 43752 | 515 | 62 | 364  | TGTGTTATAACCTCTCAAACCTTTTTCTGAATTAATAATCAATCAGGGGAGTTTGACA  | 42663 | A_95_P086693 BP529607     |
| 43759 | 515 | 69 | 705  | GATACTTTATGATCTGCGATATTTTACATTTCTACTGAAGACATGTTTCTTTCCCTC   | 42677 | A_95_P150637 EB680772     |
| 43761 | 515 | 71 | 828  | AAGGATTCGTTTCAATTCTATGTATACATCTCCCTGATCGGCTCGAGCTACTGCCTCTC | 42681 | A_95_P288983 FG160073     |
| 43768 | 515 | 78 | 1396 | TGCAACTGGTTGTACCAGTATCAAACAATCAGATAGTGGCAGTGTATGGTATAAAT    | 42695 | A_95_P130772 TA12620_4097 |
| 43784 | 516 | 9  | 1194 | CCTTGACAGTTAGAACATGAAAGCAGAGATAGTTGTTTTAGCAACAAAGTTTGTGT    | 42562 | A_95_P014806 TA18534_4097 |
| 43785 | 516 | 10 | 909  | GGTGCTAGAGAGAGGAAGTGATCGAACCTTGGTCACCATATGAATCTCTGGATATTT   | 42564 | A_95_P234309 EB444751     |
| 43786 | 516 | 11 | 715  | CAAAGGACTATTGTTTCTGTATGCTCCGGTCTGTGAGATTATCTTTGCTGGACTTTTT  | 42566 | A_95_P020761 EB684204     |
| 43790 | 516 | 15 | 234  | TCTGAGGACTCGGTTTACGGCCATTACATGAAGAAAAACCATTGCTCGAGGGATAT    | 42574 | A_95_P058016 BP134363     |
| 43794 | 516 | 19 | 659  | GGCCAGTGCGAGCTTCTAGAAATCTTGATATTTATCCTATGTATAACTATCATTCTT   | 42582 | A_95_P220747 EB437995     |
| 43795 | 516 | 20 | 654  | GTGATCTCACAGATCACCTCATGAAGATTCTCACAGAAAGAGGCTACTCTTCCACCAC  | 42584 | A_95_P128147 FG139197     |
| 43798 | 516 | 23 | 628  | AATGGATAGTCAGGTCACTTTACGTTGGACTCTGATGAAACGAGATGAAATGGGAT/   | 42588 | A_95_P039196 BP129484     |
| 43799 | 516 | 24 | 1324 | GAGAACTGAGAAGTGAAACTCTTACTGGAATTACAGATGTAATAATAACAATCCTGTG  | 42590 | A_95_P199547 TA17018_4097 |
| 43800 | 516 | 25 | 1207 | CCTTTTGTAATGACCAACAAATGGCCATAGTATAGTTTTCAATTCTTAAAGATAACCT  | 42592 | A_95_P180632 TA12792_4097 |
| 43801 | 516 | 26 | 403  | AATCATGCTCAAGAAACATATTCTGATAGAGTTCTATTTGAAGTTCCGTCTCCTAACC/ | 42594 | A_95_P075470 BP526737     |
| 43802 | 516 | 27 | 2443 | TATACAAGTTCTCGGACGAGGTTTTTGAACAGAACTTCGATAGGCGAGAGGTGTAAC   | 42596 | A_95_P012761 TA12579_4097 |
| 43811 | 516 | 36 | 863  | GAGAGCAATCTCTTATTGTCGGTGATATTTTTAGCGGGTCTTTTTAAGTTTCATTTTT  | 42614 | A_95_P232414 EB425093     |
| 43812 | 516 | 37 | 0    | ACATATTTTCACTTACTCAGCTACTCAGAGTGTCTGCTTTGCTGTCGTATCCCATCTGC | 42616 | A_95_P298003 A_95_P298003 |
| 43814 | 516 | 39 | 713  | TGGAGGCTAGTGATGACAATGATATACCGGCTCTGGAATCTCTTGATGTGGAAAGCT   | 42619 | A_95_P014661 EB449721     |
| 43816 | 516 | 41 | 397  | CCAACCACAGTTCACATTGTATATGAAGGTGGAATATTGCATATCAGTGAATTATG    | 42623 | A_95_P221127 TA21755_4097 |
| 43817 | 516 | 42 | 723  | CTTCAAAGTTGTGGGTATCTAATCAACAGTTGTAATAAAGAGAATCCTGTTCTTGCA   | 42625 | A_95_P014176 EB437412     |
| 43821 | 516 | 46 | 806  | CCTCCAGTACGTGAAGTGTCTTTTCTTTGTGCTTGGTAATACAGTTGAACCATGAGGCT | 42632 | A_95_P128287 EB427837     |
| 43827 | 516 | 52 | 850  | TCTGTTTTGAGCTGTAGTAGATCTTAAATGTGCTGCTTCTCATGACTCGTGCTTTACCT | 42644 | A_95_P284858 FG163875     |
| 43828 | 516 | 53 | 358  | AATGCTTCACATATATTCCCTCATAACACACCGATTACAAAGGAAGCCTACTATTATA  | 42646 | A_95_P006901 AY061820     |
| 43829 | 516 | 54 | 508  | ATGGAGCTATCTGTTTGAGAATGTCCCGATGCTAAATTAAGTATACATCAGTTGTGA/  | 42648 | A_95_P024591 FG631924     |
| 43831 | 516 | 56 | 542  | AGTTCCTGGAAAAGAAGCAAGGGAGGAATCTGTAATTTAATGGGAACCTGCCAAGT    | 42652 | A_95_P089758 FG153402     |
| 43840 | 516 | 65 | 771  | ACAGAGATCAGGAAAATTAGCAAGTTAAGGCACAAGAATATATTGCAGTTATTGGC/   | 42670 | A_95_P238764 AF252414     |
| 43848 | 516 | 73 | 192  | AAATCGATTAGGAGCTAATCCACTGAGAGTTTGCCATGTGTATTAAGCTTTCTACTAA  | 42686 | A_95_P078670 BP527574     |
| 43849 | 516 | 74 | 382  | GTGTCTCATGTTCTTTAGTTTGGACAATCCAGTTGAGGCTATCAATTATCTTTGCTGC  | 42688 | A_95_P134157 EB436084     |
| 43850 | 516 | 75 | 901  | ATGTCTGTCTTTGTTTACCTGTACCTTCTGAAGACTGGCATGTGGTAATTATGTGTG   | 42690 | A_95_P188947 EB447633     |
| 43865 | 517 | 5  | 676  | CTAAGTGCCTATTGGTTCTATATTTGGCCTCAAGTCTTGATGTTTATGTTAACTGAA   | 42704 | A_95_P194602 EB446340     |
| 43866 | 517 | 6  | 555  | ACTGGGACTTTTGGGATTCATTATCATGTCTATAGGAACCTCCACAATAATACAGCAT  | 42706 | A_95_P187407 TA14340_4097 |

|       |     |    |      |                                                              |       |                           |
|-------|-----|----|------|--------------------------------------------------------------|-------|---------------------------|
| 43867 | 517 | 7  | 93   | GGCTTGTGCGTGTAGTAGACAACATGAATTCTGATTGGCTATGACATTGAACGATT     | 42708 | A_95_P139397 EB443139     |
| 43868 | 517 | 8  | 794  | CATTCTAATGCTTAATGCCACAAGTCAAACCTCAGTGAATCATGTCATCAGATTCCTAT/ | 42710 | A_95_P294053 EB439288     |
| 43869 | 517 | 9  | 208  | CTTAGACTCCATTCAAGTTACAATTTATTTGCCTCCGGTGCTGATATCAAATCAATCAT  | 42712 | A_95_P138397 EB442167     |
| 43871 | 517 | 11 | 1190 | CATACTGGCTATTATTCTTGACAGCTATCTGGAACCGATCTTAGACGATATTTTGG/    | 42716 | A_95_P140172 U60057       |
| 43876 | 517 | 16 | 790  | CTATGTTCTTAGCGCAAGGCTTTGTGCTTTCTTTGAAGTGATTTACTGATGTTTCTTCT/ | 42726 | A_95_P284533 DV157765     |
| 43877 | 517 | 17 | 1164 | ATGAATTCATGACCATCAGTTAAAGGTGGCGTTGCCTTCACGACCAGTGCAAACAA/    | 42728 | A_95_P022826 TA14385_4097 |
| 43878 | 517 | 18 | 729  | TGTTTCTCCATCTTTAACTCCTTCATGATGGTCATCTTTCTTACTGGTCTGGTGTCTATC | 42730 | A_95_P162428 EH621378     |
| 43884 | 517 | 24 | 398  | AGTGAATCACAACCTGAAAGAAGATGAACAACCTGCCACGAGCTCTGCATGGAGAGC    | 42742 | A_95_P041501 TA16023_4097 |
| 43887 | 517 | 27 | 56   | TTGAAGTGTGAACAACAAAGAAAAGATAAGTCCAGTCGACCTCCCCCTCTAGCCTCC    | 42748 | A_95_P045911 BP131261     |
| 43889 | 517 | 29 | 579  | ACAGATGTTGTATTATTATGACACTCTTAGTAGATGGTCATGCACTTGTGACATCGG    | 42752 | A_95_P121507 DW001586     |
| 43890 | 517 | 30 | 587  | TCTTTTATTGCTTGTGGAATCATGTTCCGGGTGTAACATAAGATAACTGCTTAGTGAC   | 42754 | A_95_P191992 TA15357_4097 |
| 43894 | 517 | 34 | 655  | TGACTTTCCCTCAGAGAAATACATGAGGTCCTATATACCAAATATTTCTGTTCCGGAAA  | 42762 | A_95_P299623 FG190948     |
| 43896 | 517 | 36 | 816  | GTACCCTGCTGAGTTAGTATTTATGGCCCTGTATATATATATATAGGTAAGTGCATCAT  | 42766 | A_95_P022776 TA21613_4097 |
| 43899 | 517 | 39 | 1026 | AGGAGAAGGCAATATCAAACGCTATTGTTAATCTAAGTTTTTCATGTTCTTCAGTGTC   | 42772 | A_95_P176577 TA11646_4097 |
| 43902 | 517 | 42 | 682  | TGTATGAATTTTGGAGATGACACACATGCTAGGTGACGGGCATGTGGGTGTGCA/      | 42778 | A_95_P306438 FG643392     |
| 43903 | 517 | 43 | 765  | ATCTGAATTTGTATTGAAATCTTTTTCTTGCGGCGAATGGATTGCGTGTGTGACTTT/   | 42780 | A_95_P178422 DV160879     |
| 43904 | 517 | 44 | 350  | TAAGAGTGCTTTGCTGTCCAATAATGGTCACATCCTTTCAGTTGACCTCTAAACCTA/   | 42782 | A_95_P093498 BP532290     |
| 43909 | 517 | 49 | 773  | TACACATTTACTTTGTACCCTCCGATGGTAATGTTCCGGCCTTCTCCTTGTGTGTGAC   | 42792 | A_95_P199492 EB678882     |
| 43917 | 517 | 57 | 461  | TAAATTTTACCATTCTGCAGGAGTCTAGCAATAGTTGGCAGGATGGAGATTTAAAC/    | 42807 | A_95_P264286 AM840522     |
| 43918 | 517 | 58 | 861  | AGGATTATACGTCGGGCTCTACTCTCCCTCCAGTCTTCATGTTGAATTCGTAACATGC/  | 42809 | A_95_P229244 EB425232     |
| 43924 | 517 | 64 | 1483 | CTTGAAAGGAAACTGTAATGTATGCTCAGTATTTTTCCCTCCAGAACTATGAAAGAA/   | 42821 | A_95_P025186 TA14118_4097 |
| 43925 | 517 | 65 | 808  | GCTCTGTAAAGTTGAAGTTGATGCACACTACTCTTGGTTGAAAGAAGGAAATCCTTG    | 42823 | A_95_P265871 EB678199     |
| 43926 | 517 | 66 | 414  | TGGCAATAGATCTTGACACTACATTTTGGCGTGGGTGTTAGATTTTGGTTTATTGATT   | 42825 | A_95_P212682 TA19888_4097 |
| 43927 | 517 | 67 | 330  | GAGCCAAACAGGGTGGTCAATGAAGTTCTCGCTAAATAATTGTGGATTGGATATTA     | 42827 | A_95_P104437 CV017014     |
| 43959 | 518 | 14 | 496  | TACAAGAAGTTGAGCTTGTGATGAGGCTCACGGGAATCTGAAGAACGTGGCATCAT     | 42723 | A_95_P207322 TA18715_4097 |
| 43963 | 518 | 18 | 730  | TTTCCTTTTGGTTACTAGGGGATTTCTATTACTGATTTATGGGATTTGACTCCAATGATC | 42731 | A_95_P201667 EB678092     |
| 43965 | 518 | 20 | 902  | GATGTCTTATGTGGTTTTGGGTGGTTTCTACTGTTCTGATATGATGACTTTTCATCTGA/ | 42735 | A_95_P258576 TA11956_4097 |
| 43973 | 518 | 28 | 1144 | TGTAAGAAGCATACTTTTATCGGTCATCTGAATGGTAGATGTAACGGTAAAGATTTA/   | 42751 | A_95_P210292 TA19367_4097 |
| 43975 | 518 | 30 | 409  | GAATGTTATCCTTTTGGTTGCCACTTTCTTTTAAATGTAGCCTTTTGTGAGTAACTGG   | 42755 | A_95_P098498 BP534502     |
| 43977 | 518 | 32 | 781  | ATTCAGGCTGACTTGTGGGTAGTCCGGTTGTAAGACCAGCTGATATAGAAACAACA     | 42759 | A_95_P214882 TA20359_4097 |
| 43978 | 518 | 33 | 736  | TTGACAGTAACCAGAGTTTTCGTGACTGTGAGATAGGAGATGGGGATATAATTTGCT    | 42761 | A_95_P269996 EB428655     |
| 43979 | 518 | 34 | 494  | TCTATCTCCCTTAAAGCTCATGGTGAAGGCAATTTCCGGTACCAAGCTCTCATTCTTC   | 42763 | A_95_P073670 BP526271     |
| 43980 | 518 | 35 | 575  | TGCATTGTGTAGTTCATGATTGGCTGTTCTGTATTAACATAACAAGTTCAAACATTCC/  | 42765 | A_95_P193182 TA15616_4097 |
| 43983 | 518 | 38 | 664  | GATTCGATTTTCTTCTCGGCAACCGCTATTAAGTTGTTTTTCCCACTGTATTGTTTT/   | 42771 | A_95_P214602 TA20297_4097 |

|       |     |    |      |                                                             |       |                           |
|-------|-----|----|------|-------------------------------------------------------------|-------|---------------------------|
| 43992 | 518 | 47 | 868  | AATTTGTAACCATTTTGGGGTCGTTTTGTGAAATGTCAATATGGGCGGCTTTGATGA   | 42789 | A_95_P227774 EB425751     |
| 43995 | 518 | 50 | 1505 | TGTTGCTGTGATGAAGTAATCTTTAACATACCAAGAAAGCCCTATTGACAACGCTAGI  | 42795 | A_95_P191102 TA15157_4097 |
| 43997 | 518 | 52 | 737  | TATGTACCAATTGTTCCAAGGCGGGTGGGACTATTGAACCAGATGGCGAATATCCTT.  | 42799 | A_95_P195517 TA16135_4097 |
| 43998 | 518 | 53 | 831  | TTCCCTAGGATGGGATGGATTGTTTTCTGGCGAGGTCTAAGATTACGTATGGTCGA.   | 42801 | A_95_P017276 DW003721     |
| 44001 | 518 | 56 | 1828 | GCTCTAAACTGGTGACAACCTGATATCATGACCCAATCTGAATTTCTTTTTATATGTTT | 42806 | A_95_P184617 TA13733_4097 |
| 44002 | 518 | 57 | 787  | TAGTGATACTATTGTGTTCTCTTGCATTCAAGCCCTCAATTTGCAGCAGTTTCATTAT  | 42808 | A_95_P162027 EH620774     |
| 44008 | 518 | 63 | 0    | TTGATGGATGTCTTCTGGGGTTGGTTTGTAAATGACTCAGTGAATTGGGTACGTTTT(  | 42820 | A_95_P019226 A_95_P019226 |
| 44021 | 518 | 76 | 698  | GAGACAGAATAGTGTCCGATTTTCATGTGTGAAATGCTTTCTTTATTTGGCTGATGTA  | 42846 | A_95_P093178 EB438892     |
| 44022 | 518 | 77 | 768  | AAATTTCTGTGGCTGGTGCAACATACAAAGCAATGGAGCTTGTCCGGCTCGACAGTTG  | 42848 | A_95_P120657 FG141669     |
| 44041 | 519 | 11 | 592  | CCAAATCCAAGTTGATAGATGGAATTTCTGCTTACCAAGTTTGACACCATTGATGATA  | 42865 | A_95_P200837 DV158412     |
| 44049 | 519 | 19 | 709  | ATGCTGCTGATCAAAACAGAAATGGTTTTCTCCAAGGCACAAGAAGCTGGGTTTAA    | 42881 | A_95_P152447 EB682780     |
| 44050 | 519 | 20 | 1469 | GTTTTAGTTAAACACTTTAGTTCTCTTACCTATGTTGCCTTCTGATCTTCTGGCAAA/  | 42883 | A_95_P008871 TA13572_4097 |
| 44053 | 519 | 23 | 547  | ACCTTGTTGAGCAGGAAAATCAATTAACACATGAAGTCTCTCTCAGATACAATAG/    | 42889 | A_95_P040486 BP129843     |
| 44054 | 519 | 24 | 553  | TCTTTATACGGGCTGAAGTGAAACTCATAACGACATTTTCATGGCTGCCATAATTAT   | 42890 | A_95_P099288 BP534870     |
| 44059 | 519 | 29 | 761  | TGAAGAAGGGGAGAAACTGTATTTCTGCTGCCAAGGGAAATTTAGTACGGTTCCCT    | 42900 | A_95_P252754 EH618717     |
| 44062 | 519 | 32 | 326  | TTGGTCAAACCTCTTAACACCGCAAAGCTTGTGCTAAACAAGAAGGGTCTGCTCGA(   | 42906 | A_95_P108477 CV018851     |
| 44063 | 519 | 33 | 496  | GCACGGAGTCATTACTATTGAGCCTTAGACTATGATGGACATCTAGAAGAAGAACA    | 42908 | A_95_P307283 FG638101     |
| 44065 | 519 | 35 | 244  | CATCTGGAAACGACAATAGCTCCTCTTCTCCGGTGATAACAATAATAACAATAA      | 42912 | A_95_P001316 EH616009     |
| 44067 | 519 | 37 | 379  | GTCATAGACTAAATGGGCTTAATTGCGTCATTGGCAATGATTTCTATAGGGATAAGA.  | 42916 | A_95_P143662 EB446899     |
| 44072 | 519 | 42 | 278  | AAGTTCGATCTTATGTTTGCCCAACGTTCTTTCTGTCCTGGTATGTTGGTGAAGGTA   | 42926 | A_95_P106932 CV018133     |
| 44073 | 519 | 43 | 418  | AAGATTACCAGTACACTAGATATGAGGAACAGAAGGAATAAGACCAGTTCATCAGA(   | 42928 | A_95_P089088 BP530342     |
| 44074 | 519 | 44 | 508  | TGCGTTTGATTGCAAATCAAATTTGTTTCGATATGGATTTTGGCCATCCTTGTGTTA   | 42930 | A_95_P196717 TA16400_4097 |
| 44078 | 519 | 48 | 740  | TTAGCACCTGACTGTTGAATTTATTATTGTTATTGTTAGAAGAAATGGTGAGAGATGC  | 42938 | A_95_P273161 EB681926     |
| 44079 | 519 | 49 | 255  | GAAATGGATGAAGCTCATCGTAAATGCCTTCGAGCTGAAGGCTTCAATGTCTGAAGC   | 42940 | A_95_P095663 EH623842     |
| 44081 | 519 | 51 | 547  | GGAAAGGAAAATGTAATTGAAAAGATGGAAACAAGAATTGGGCATTTGATTTCTGA    | 42944 | A_95_P005326 TA14182_4097 |
| 44085 | 519 | 55 | 187  | CAGGCGGTGCAAAAAGAGGAGTGCCAAGGAACAACATGATAATGAATAATTATGG/    | 42952 | A_95_P159232 EH617186     |
| 44091 | 519 | 61 | 317  | GTTTCGGTAGGAGCTTATGCTGCGATGAAACATGTTGTGTTTTAATTTCAATGAAGTTT | 42964 | A_95_P001066 FS411872     |
| 44097 | 519 | 67 | 484  | CGATTCCCTCAATACAGCTTAACTCCGTCAAGCCTGTACGAGTAGTGAAGAAGTATA(  | 42976 | A_95_P282203 AM792645     |
| 44102 | 519 | 72 | 686  | GGTTCTGGCTTTGATTTTTGTAGTCGCTTCTTCTGCCCAAGTTCTGAATTCATGAGG/  | 42986 | A_95_P159517 EH617764     |
| 44106 | 519 | 76 | 382  | CGTCTGCTTCCGAAAGATGATTAGAAATGGTGACTTGTATAGAGAATGTTGATATA(   | 42994 | A_95_P132172 EB432641     |
| 44107 | 519 | 77 | 1462 | ACTGTTCTAGGAGACCATTTTGGAGTCCCTTTTAAAGTAGATTTCTTCTCTTTGTT(   | 42996 | A_95_P028716 TC71857      |
| 44122 | 520 | 7  | 887  | AACTATGTGAGATACGACTTCATCCTCGAGGTGGGGTAAATCTTATCGTAGTTTAGTT  | 42858 | A_95_P013176 TA12893_4097 |
| 44127 | 520 | 12 | 866  | CATCCTAAGTAATTCTCCGTGCTGTCAATTAACATGTCTGGATCTTGTATCCCTGACT  | 42868 | A_95_P184867 EB439049     |
| 44130 | 520 | 15 | 776  | AAATCGTTCGTGAAGCAGACATTATTATTGCTGCCGCGGGCAAGCTATGATGATCA    | 42874 | A_95_P021351 FG169533     |



|       |     |    |      |                                                             |       |                           |
|-------|-----|----|------|-------------------------------------------------------------|-------|---------------------------|
| 44132 | 520 | 17 | 234  | CTAGGTGGATTGGAAAGATAGTTATAGTATCATTATTGTGGTAGCGAGATAATGTAG   | 42878 | A_95_P219922 TA21498_4097 |
| 44133 | 520 | 18 | 533  | TCTTAAAATTGTTAAAAACAAATGCGCATCAGGTGACACTCCCTGCACCTAGTTGTCT  | 42880 | A_95_P101723 CN498901     |
| 44140 | 520 | 25 | 500  | GTGTGGGTAAATCAGCTTATACTGATTTCTTTCTCAATGTTCAATGCATTTCTAGATC  | 42893 | A_95_P001151 FG640488     |
| 44143 | 520 | 28 | 812  | CTGAATAATAGTCACTCGTGTTAGTCTGAGTTTTGAATTGCCAAATGCGAATAGTATA  | 42899 | A_95_P181912 EB425536     |
| 44145 | 520 | 30 | 375  | CACATGTAATTTAGACAACACTAGCATAAATGAAATTTTACGGGTTACCTCTGAAGCGT | 42903 | A_95_P306853 FG636547     |
| 44147 | 520 | 32 | 859  | ACTGATGGGGATGATGCCCTACTGTTGCATTGGAGGAATTGTTGGCTGATCTTGAT    | 42907 | A_95_P233644 DV161350     |
| 44150 | 520 | 35 | 796  | TTGCATGGAGATTTGATGCTAAGGCTGCACTTACTTTGGGGATTTGAAGGAAAATAA   | 42913 | A_95_P228674 EB449849     |
| 44159 | 520 | 44 | 1209 | GCTGGCTGCTTGCTAAGCATTTTCCAGATTTGCTGGCAATTTGTATTCTATTTTTAAT  | 42931 | A_95_P008401 TA13254_4097 |
| 44165 | 520 | 50 | 449  | TGACTCCAGGTTTTGGGGTATTGCGGGACATTTGTGGTTGTGTTTACACCCTATCTTA  | 42943 | A_95_P061125 BP135184     |
| 44169 | 520 | 54 | 777  | TTTGCTGGCTATGCTGCCGGTATTGCCGCATATCTAGCAACACATAATCTCAACATCT  | 42951 | A_95_P235924 EB450449     |
| 44172 | 520 | 57 | 175  | GCATTGCATTGACAAGCTCCTGTAATATATGAATGTTGTTAGGTTTACAAATGCAA    | 42957 | A_95_P110642 TA12282_4097 |
| 44180 | 520 | 65 | 811  | GACATGATTCTCTCATTTCCAGTAGGCATATGGACTGATTTTTGTGGACTTCTATTA   | 42973 | A_95_P126127 EB425373     |
| 44183 | 520 | 68 | 92   | ATATGAAAGTATCGCATTTCCGCTACGTTCTTCATCGATGCGAGAGCCGAGATATCCG  | 42979 | A_95_P118517 DV161600     |
| 44187 | 520 | 72 | 434  | TGTACAAGACCGATAAAAAGCAAGTATGAAGCCACTGCTCGGAGCTGGACTCAAAAA   | 42987 | A_95_P108802 CV019009     |
| 44190 | 520 | 75 | 872  | GGAAGCATCAAAAGATTGCTGTTTGTGATCATTATATTCTCCATCAATCAACCATCTT  | 42993 | A_95_P217082 EB424688     |
| 44194 | 520 | 79 | 841  | GGTCGCTCCCTTGCTTTTGGCTCAGCAGATCACAAGATATATTATTATGATCTACGTA  | 43001 | A_95_P268306 DW001336     |
| 44195 | 520 | 80 | 355  | GGAACTTTACCTATGTTGTTGTGAAGCCTATTTGTATCCTTAAGGCGTTGGCCTTTT   | 43003 | A_95_P140637 TA14595_4097 |
| 44213 | 521 | 13 | 488  | GGTGGGATGTTACCTTTGGCTATGTAAAATAATAGAATTTGTGACTGAGCTTCTTGT   | 43016 | A_95_P000586 EH616662     |
| 44216 | 521 | 16 | 844  | GGGTTTAGCTGACAATGACATGTTTGGACATAGTTTGTGTTTATTATGATCATTCTA   | 43022 | A_95_P192497 TA15464_4097 |
| 44220 | 521 | 20 | 524  | GTTTGTGCTGTTGAGATTCCATTTACTCCTCGTCAAAGCGTGTTCTTGAACCTCTC    | 43030 | A_95_P196062 FG137301     |
| 44221 | 521 | 21 | 1019 | CTGTGAACTAGTGTTAAGACTTCTAATAGCTGTTAGAAGAGACTTGGATTTATGAC    | 43032 | A_95_P185812 TA13996_4097 |
| 44232 | 521 | 32 | 627  | CCCGTTTTAAGGACTGGGTGTAAGATTTTTGCTGCGTCCCAATATCTACAGCATGTT   | 43054 | A_95_P182657 TA13270_4097 |
| 44235 | 521 | 35 | 406  | GGTCTGGTACCAATGTTCTGTGATCTGTTTATATGCTTCTTCAGGATTTGTTGATACT  | 43060 | A_95_P132362 EB432837     |
| 44239 | 521 | 39 | 291  | TGATCCATGGTTTGAACAGACACTACTACTCAATAACCATAACAACATACAGAAAGAA  | 43067 | A_95_P112702 CV020789     |
| 44242 | 521 | 42 | 480  | CAAACCTGTGCTGCATCTTGTTTCGTCAGGATTAATTTGTTGCCTAGGCACAAAA     | 43073 | A_95_P076925 BP527119     |
| 44245 | 521 | 45 | 748  | AAGGTGTAGAAGTTTTATACAATTCAGCTTCTGTAATGCTTGGTTGTCATATTAATCC  | 43079 | A_95_P230209 DV158827     |
| 44246 | 521 | 46 | 1919 | TCAGCTTGTGCAACAGAATGATGCTGTGGCAATGAAGACTGCAGACACTGAAGTAA    | 43081 | A_95_P176262 U01961       |
| 44247 | 521 | 47 | 479  | TACGGTACACAACCTGAAAACCTGGTTATTGTAATCCGAATATGAAGCATGAATACGA  | 43083 | A_95_P089258 BP530424     |
| 44253 | 521 | 53 | 624  | GTTGAGGATCGAAGACAATGGATGTCAACATAATATGTAGAATTAGCTGATTGTACC   | 43095 | A_95_P262351 EB450487     |
| 44254 | 521 | 54 | 513  | AAGAAGCGGGCAAAAGTTTTCTTTATTCATAGGCTTTGGCTTGAACGAGTCTGCCA    | 43097 | A_95_P150162 FG163431     |
| 44259 | 521 | 59 | 872  | ACCTGATGAAAGCCAAAAATTGAAGGAATGAAAACCTCTAATTGGCTTTTCACTTCT   | 43106 | A_95_P069935 TA12296_4097 |
| 44265 | 521 | 65 | 321  | CTGAGACTCAAGATTTTCCATATCTTAGATGTTGATATAGGTGAGTCTGAAAGCATGC  | 43118 | A_95_P155267 EG649990     |
| 44267 | 521 | 67 | 799  | TAAGAACCCTGTCATCATCGTCAGTATATGGCAACAGTTATATCGAGCATAGTTATC   | 43121 | A_95_P144447 EB447804     |
| 44270 | 521 | 70 | 701  | GCTGCACAAGCGTTGGGGAAGATTCCAATTGATGTGGAGAAGATGAATATAAGCTT    | 43127 | A_95_P189232 EB441756     |

|       |     |    |      |                                                             |       |                           |
|-------|-----|----|------|-------------------------------------------------------------|-------|---------------------------|
| 44273 | 521 | 73 | 1258 | CACCTGTGACAGTGGATTATAACAGGAATTTCAAGAGCTGTGCTGCTTGTTCATCAA   | 43133 | A_95_P180292 TA12709_4097 |
| 44275 | 521 | 75 | 482  | TTGTTGGTTTCAACTTTCATGGGTGGTGCAGCCATTACAATTGCCCTCCAGCAACTTA  | 43137 | A_95_P083935 BP528893     |
| 44280 | 521 | 80 | 678  | CCGCTCACCAAATCTCATGTTTTCTCGGACAATATATGAATATAGGATCAATTGATAA  | 43147 | A_95_P271941 EB446273     |
| 44293 | 522 | 8  | 170  | CTCTCATGTTTTCAAGCGCAAGCAAAATAGGATACTGTAAATTATTTATAGGGCGTTTT | 43007 | A_95_P142992 EB446386     |
| 44296 | 522 | 11 | 505  | CCTGCTTCAACTTGATGTCATGGATAGACTACCCATTTGTCTCAAACATCTAATTATTG | 43013 | A_95_P177762 TA12067_4097 |
| 44300 | 522 | 15 | 894  | AATATGGAATTTCTCTTTGGACTTGACATGCTTCGCAAACACCAGTGCATGATTGATC  | 43021 | A_95_P253504 DV158761     |
| 44306 | 522 | 21 | 606  | CAGCAGTGTTATGTATGTGAAAGTGTCACTCTTATGTTAATCACAGAAATCATGCTTT  | 43033 | A_95_P232699 FG645464     |
| 44307 | 522 | 22 | 471  | GTTGGCGAAGTGTGTTTCATGATATTCACAGCTTCTGCAGATGATGATCTAGAGCCAA  | 43035 | A_95_P074910 BP526590     |
| 44313 | 522 | 28 | 896  | TGGCGATCTCATACTGGTTCCTTGATGGTCACTCACAAATTCGACCCAAGTAATTGAT  | 43047 | A_95_P196302 EB428815     |
| 44317 | 522 | 32 | 1745 | CATGACTCTGTCAAAGTAAGGTAGGACAGTGACTCATTGTAGAAAGTTGAATTTTAT   | 43055 | A_95_P239499 AB022693     |
| 44322 | 522 | 37 | 327  | GATGAACTTAGGTAATCAGGTTGACTTGGAAGATTATGTTTCTCGCCCTGATCAAA    | 43064 | A_95_P090175 BP530836     |
| 44323 | 522 | 38 | 910  | TGAAGGAAACAAATGCTGTATTATTTGGCTTATTGCCTCTGTATTATCATTGTCGAGA  | 43066 | A_95_P011481 TA13633_4097 |
| 44324 | 522 | 39 | 519  | GCAGCTTCAGCTTCTCGGAAGATGATGCTAAAAAATTTGGAGAAGGAAATTGATGAC   | 43068 | A_95_P134477 EB436843     |
| 44329 | 522 | 44 | 346  | GCAGGTTTCTGTGTGCCTTTAGCAAGTGGAAATATGTTTAAATCATCTTGATTTTTGT  | 43078 | A_95_P210242 TA19357_4097 |
| 44330 | 522 | 45 | 866  | TTGATTTTTACATGAATGGACACGATCACTGCCTTGAACATATTAGCGACACCGAAAC  | 43080 | A_95_P227769 EB425136     |
| 44333 | 522 | 48 | 797  | TGTTGTTTCGCATGTGTAGTAACAATGTCCCGTGCACATGTCTGAGCTTTGAGTACTTC | 43086 | A_95_P190812 TA15095_4097 |
| 44335 | 522 | 50 | 227  | CGGTTTGTGGGGTAACCGTTTTGTGAAAGTCAAAGCGGTTTATTAATTTATTT       | 43090 | A_95_P130542 EB430594     |
| 44338 | 522 | 53 | 931  | TAGGTGCATAGTAGGAATCCCTAGAAAGTTGGGGTCTGTATTAGGAGTCCATTATT    | 43096 | A_95_P183837 TA13548_4097 |
| 44340 | 522 | 55 | 789  | CAAAGAGAGTAGCTGATGGAAGTGAAGAAATCAAATATACAGAGCCCAAGCAATTA    | 43099 | A_95_P229004 EB681088     |
| 44341 | 522 | 56 | 2787 | ACACCTGTCTTTACGGTGTTAAGAGTGTACTGCCGTGTTTTATTTAAAGATATCTTT   | 43101 | A_95_P015026 TA12219_4097 |
| 44344 | 522 | 59 | 278  | GTTGGTAGGGGTTTATGTTGGTTTGTGAATACAACAAATGAAACAATGAATGAAGAC   | 43107 | A_95_P132937 EB433802     |
| 44352 | 522 | 67 | 963  | GTTCTGGACTGTAAAAATAATTCTAGGGTGGTTGCTTCAACCAACGTCTTTGTCAAAA  | 43122 | A_95_P244772 AB286176     |
| 44353 | 522 | 68 | 216  | TTGTACGGTCTTACACTGTGGTCTTCGGTCTTGTCTTCTGCTGTGTATGTCTGGACA   | 43124 | A_95_P105457 CV017467     |
| 44357 | 522 | 72 | 561  | AAGGTGGTGCTTTACCCTGTAATCCTTGATTTAGCGGCAATTGAGTACATTTATTTG   | 43132 | A_95_P201427 AY329066     |
| 44361 | 522 | 76 | 1038 | GGAAGGCCTTTTATGTTCTTTGTTGCCAATCATCTTTCTTGGCAGTTCTGCCCTCTTTT | 43140 | A_95_P112932 TA16625_4097 |
| 44390 | 523 | 20 | 1182 | CTATTATTTTGCTACGTAGTAGTATATGACTTACCTGTATCCGTAGGTGGTTAAGCAG  | 43172 | A_95_P199917 TA17097_4097 |
| 44391 | 523 | 21 | 692  | AATTGCCACCAGAAGAGCCGGTATATTTTTGATCTCTATCACAGGAGGAAGGAGAT    | 43174 | A_95_P287988 FG184919     |
| 44392 | 523 | 22 | 0    | TCTGCCAACATGAGTCATAAGGGTGTATTGGTATCCATCTATTTGACAGTTTTGGAAC  | 43176 | A_95_P309113 A_95_P309113 |
| 44397 | 523 | 27 | 1261 | CATCTGCTTCGAAAGGTGCATTCGTTATACAAAATTGTGAGATCAAAGCAGAACCAG   | 43185 | A_95_P013951 AY772945     |
| 44403 | 523 | 33 | 775  | AGGTGAGATTGTAATATTGCACAATGCTGTTGGAGTCTTGGCAGTGTGTTGGAATTGC  | 43196 | A_95_P031091 EB450512     |
| 44407 | 523 | 37 | 473  | TAGGAGTCCTTAAATAGTACAGAAGTGAAGTTGGTTCATGTCTGAAGAATTA        | 43204 | A_95_P133122 EB434344     |
| 44409 | 523 | 39 | 740  | TGGGTCTGCAGTTAATCTTAGTGGGTGTTTGTATTGGATGTCATATAAATTGATATG   | 43207 | A_95_P287073 FG162850     |
| 44421 | 523 | 51 | 605  | CATTTCCATGCCGATCATTATATTGGCTTGACGAAAGTATGGTCACATGGCCATATCT  | 43231 | A_95_P220517 TA21624_4097 |
| 44422 | 523 | 52 | 478  | GAGCGTTTAGCTTTTTTTCGAAGATGCCATCGGAACATTTTTTATTGTTAAACAACCAG | 43233 | A_95_P096923 TA13055_4097 |

|       |     |    |      |                                                             |       |                           |
|-------|-----|----|------|-------------------------------------------------------------|-------|---------------------------|
| 44425 | 523 | 55 | 183  | ATTTTAGAACATGTCAACCGCAGAAGAGTCCACTTGAGCAAACAGCACCTGCTGTTG   | 43239 | A_95_P104202 CV016886     |
| 44427 | 523 | 57 | 503  | CTCTTAACCCATCATACCCTTAAGTACATGTGTTATGTGTGCTAGTACAATTACAATG  | 43243 | A_95_P221332 EB680130     |
| 44429 | 523 | 59 | 641  | TATCTTAGTGATTACTAATATTTAGTCCATAGGCCATTAGAACTTCATCCCCCTCTCC  | 43247 | A_95_P116337 DV159031     |
| 44430 | 523 | 60 | 203  | GATTTGTGTATGAGAACGTTGCTGTGTTTTCTGCAACATAATATAATTTGCGATCCTC  | 43249 | A_95_P096058 BP533454     |
| 44437 | 523 | 67 | 832  | TGCAAAGAAAACCATTAGTGGGGAACAACATGGTGAGGTTGGTGGTGAATCTACT     | 43263 | A_95_P289068 DW000214     |
| 44439 | 523 | 69 | 441  | CGATGGCTCGAATTATGGGTATCAAAAACAATCCGATGAATGGAGACAGTTCAACGCC  | 43267 | A_95_P073660 BP526269     |
| 44443 | 523 | 73 | 142  | GTTTGTGTA CTCTCATCTGTAATCTCACTATTTTGATTTTGAAGGTGAAGCATTTGAC | 43275 | A_95_P095748 BP533319     |
| 44447 | 523 | 77 | 859  | CTGTGTCATGCGCGGTGGCATTGGAAGCTCTTAAGATCTACAAGGAACGAAATATTG   | 43283 | A_95_P225682 DV161260     |
| 44464 | 524 | 9  | 526  | GGATGTTATAATCAGCAAGAGTACGTCCATCTTCGAGCTGCTTCCGGCAAAAATCA    | 43152 | A_95_P247252 EH614418     |
| 44466 | 524 | 11 | 1055 | TTATTTGAGTTGATTTTTTGAAAAGGACTCTCAACTGTGTCTCCATTCTCTTTTCCA   | 43156 | A_95_P196127 TA16271_4097 |
| 44472 | 524 | 17 | 728  | AGATAGAGATATTGACCGAGCTATTGAATTCATCCATGGTAATGCATCTTGTGGTAA   | 43167 | A_95_P017836 TA17610_4097 |
| 44478 | 524 | 23 | 492  | GATTGTGCTTTGTTTCTGTTGGCCAATGTTGGCATGAAAATTGTTGTGTGTTTTATT   | 43178 | A_95_P206002 TA18412_4097 |
| 44480 | 524 | 25 | 239  | GCAATGGATCATGGTGAAGCATTTTGGGGCAAACGAAAGCAGCTGCTGAGAAAAA     | 43182 | A_95_P005756 TA16206_4097 |
| 44484 | 524 | 29 | 689  | AATCGACAACCTTTGGCTTCTGTATTTGAGCTTTTCTTAAGGTGAATCTTCTTCTTA   | 43189 | A_95_P015966 TA14464_4097 |
| 44487 | 524 | 32 | 2618 | GCATCTTTTTGTAAATTCTATGCTTTGGTGTCTTAGATGTGCAACTTTCCCTGGAA    | 43195 | A_95_P250117 AJ344533     |
| 44489 | 524 | 34 | 430  | CATACCTCATCACAGATACCTACAGAATTAGGACGCATACATTGTAATAGCAAAGAA   | 43199 | A_95_P022571 BP531559     |
| 44492 | 524 | 37 | 1880 | GACTAGTCCAACGTGTTAGAGGCTCTCGAAAAGTTAGCTTCGTAAGGTGCATAGA     | 43205 | A_95_P083590 AF435451     |
| 44495 | 524 | 40 | 658  | CTTAAGTGGCTAGGGTATCTTGTTAACTTTTGATTTGAAGTTGATCCTGAACTCGT    | 43210 | A_95_P119597 DV999026     |
| 44499 | 524 | 44 | 495  | CATCATGCATATATTCAACCTGGTGCTTTAGTAAGGGGAAGAGGACACAATTTGGAT   | 43218 | A_95_P073650 BP526267     |
| 44500 | 524 | 45 | 687  | AATCCTTCTTGACAATGAGGCCATTTATGACATTTTGCAGGCGGGTCACTGGACATTC  | 43220 | A_95_P283433 AJ421412     |
| 44501 | 524 | 46 | 516  | AATATGGAGCAAATGTTGATGGATACAGCCCCATCTACAACACAGATGATTGGTCTC   | 43222 | A_95_P002486 EB438907     |
| 44502 | 524 | 47 | 306  | AGGCCACACTCATGATTGATCTTGGCACAGGAAAACAATAACAAGATCAACTGGGCT   | 43224 | A_95_P112207 CV020574     |
| 44503 | 524 | 48 | 142  | AGTCTGTATTTAAAGCATCGGGATGTATGGTTTTGCCAAAAATAAGTCGTCTCTGT    | 43226 | A_95_P140062 EB444024     |
| 44504 | 524 | 49 | 953  | CAAGCAAGAGAGCAAGCAAGATGTAGTTTAGACTTGCTAGATAATTTTTTAGGTTG    | 43228 | A_95_P032676 AB025029     |
| 44505 | 524 | 50 | 583  | TGTTTCGCGTTTTCTATCACAGATTTGGAGTATTTTCAGTCGAGTTAGGCGGCATCAG  | 43230 | A_95_P054866 BP133550     |
| 44506 | 524 | 51 | 1132 | TTGTGGAATAGCCCTTGAATGAATTGCTCTTCAACATCGCATGTCTGATTTATCAAA   | 43232 | A_95_P012781 TA14792_4097 |
| 44508 | 524 | 53 | 784  | CCTTGCTAATGAGTGAATCCTGAAGAAGCCACACACAATTGATATTTCACTTTATTG   | 43236 | A_95_P215817 TA20571_4097 |
| 44514 | 524 | 59 | 787  | TGACAAAACCTGGAAATAACAATCATGTACAGCCATCGGATAACATCGGTCAGCCCC   | 43248 | A_95_P128182 EB427714     |
| 44515 | 524 | 60 | 357  | ATGGAGGATGTTGGATAACTATTTGCATTTTCATCTCAGTTTGACTGTTTTCCCTGCTA | 43250 | A_95_P308618 EB683967     |
| 44517 | 524 | 62 | 611  | AGGTTACTAATAATTCATGCACGGATTTACATGATTGAATGCGGGATGCTTCGTG     | 43254 | A_95_P069565 BP137419     |
| 44518 | 524 | 63 | 97   | GAGAACTGAGAAGTGAACCTCTTGACTGGAATTACAGATTTATTGATACAATCCTGT   | 43256 | A_95_P104832 CV017188     |
| 44519 | 524 | 64 | 813  | GTCTCTGCATGACATATATGTTACGGGTTTGAGCCGTGAAAACATTTACTAATGCTTG  | 43258 | A_95_P203522 DV157966     |
| 44522 | 524 | 67 | 753  | TCTAGTTTGAGGTAGGACTGTATTGTATATTAGCAGGCATTTGACTCAGTTCTCCTTT  | 43264 | A_95_P086510 EB678998     |
| 44524 | 524 | 69 | 482  | TAACGAGCTTGTCTAGTACAAATGTGGTGATTTACTTTGTTTTGAAGTTTGAGTGT    | 43268 | A_95_P228429 DW002260     |

|       |     |    |      |                                                              |       |              |              |
|-------|-----|----|------|--------------------------------------------------------------|-------|--------------|--------------|
| 44530 | 524 | 75 | 113  | AGTTCTCATGGTACAGTCCTATGGAGAGGGCTTCCTGTGCAATAATCTAAATGACCA1   | 43280 | A_95_P143332 | EB446661     |
| 44531 | 524 | 76 | 815  | CAAAATCCATTACAATGAATGTCCGTGTCATGTAGGCTGTACCTTGAACTTAATTT(    | 43282 | A_95_P222117 | EB424966     |
| 44548 | 525 | 8  | 665  | GTGTA AATTGCAGTAACAGGCTTTTACTGAATAGATAATACTTCTTTGTGTGACCC    | 43288 | A_95_P273686 | EH618465     |
| 44551 | 525 | 11 | 561  | TGATCAAATCACTCTTTAACACAAAAAATGGAGATTGTGGGAAGTCTAATTCTTGTC    | 43294 | A_95_P122752 | DW002719     |
| 44555 | 525 | 15 | 995  | ATACTTTGTTCTGGTACTAATACTTTCTGTTCTGGTGGGAATTTTTGTTCCCTGCG     | 43302 | A_95_P213392 | TA20036_4097 |
| 44559 | 525 | 19 | 767  | AGAAGTGCAGAACAGACTAGTAGGATCACCAACTGTTGGCCCAAGTTC AAGCAGTA1   | 43310 | A_95_P281653 | EB682384     |
| 44564 | 525 | 24 | 912  | GGTACTGTTAAACATGTCTGAAAATCCGTTACTTTATATGACTATCTTTCTAATGCACC  | 43320 | A_95_P190582 | TA15046_4097 |
| 44566 | 525 | 26 | 463  | AACGGCTGGTCCAATACATTTAGAATTGAGACGTAGTTATTATTGTAGTTTGTAGCAT   | 43324 | A_95_P001301 | FG641987     |
| 44570 | 525 | 30 | 628  | CAGTGCGAAGTGTGAAGTATGAGTGTGTTGTCAAATGTTCTTGATTGTAAGAAAAGCA   | 43332 | A_95_P152667 | EB682983     |
| 44575 | 525 | 35 | 1735 | TGATTTTCTTGACTTCGGCATCAAGAATGGTGCAGACATTGTAACAAAACATGCAACTG  | 43342 | A_95_P018096 | AF215852     |
| 44576 | 525 | 36 | 1681 | CCTACTGAGAAAAGACAGACGAGGCACACACTCAGAAATAAAACAGTTATGAATTG1    | 43344 | A_95_P191382 | TA15223_4097 |
| 44578 | 525 | 38 | 719  | AATTAACCTAGTGAAGTTTTGGTGATCCACCATGCAAACCTGCCCTTGACTCGAGGTC   | 43348 | A_95_P160502 | EH619193     |
| 44580 | 525 | 40 | 870  | GAGATGGTTGGACAGGTTGACTTCAAGAGAAAACATGGACTTTTGGCAGCTTGATAAC   | 43352 | A_95_P260091 | DV162086     |
| 44583 | 525 | 43 | 468  | AAATCAAAAAGGCAGCCTCATCAACTGTCAGACCATGGATTTGGATGTTGTCTCTCCT   | 43358 | A_95_P078875 | BP527628     |
| 44584 | 525 | 44 | 532  | TTCCTTTTGAAATCATTGTGTCAATTTAGCTGACAGTGTTAGATCCCATTTATGCCATT  | 43360 | A_95_P207807 | TA18823_4097 |
| 44588 | 525 | 48 | 160  | AGCAGCCATTTTGTAGCTTCATCCTAAGAGAAAAGAGAAACATCCACCCTCTAACCT    | 43368 | A_95_P103652 | EH664439     |
| 44590 | 525 | 50 | 848  | GGATCTTGTAACCTTCACTTTTTGGTGGATTTTAAAGTTTCAATCTCATTATATCGACA  | 43372 | A_95_P267471 | EB425928     |
| 44595 | 525 | 55 | 0    | AGTGCAGTTCCTAACAAAACCTCAACCACTGGTTTTTTCATCTGGATTTCCACCTAGAC1 | 43382 | A_95_P316888 | A_95_P316888 |
| 44602 | 525 | 62 | 597  | AGAAATTTTATAAAGCCCTGCAGCAGCCTTGTTAAGTGAGAAAACCATGGAGTTCT(    | 43395 | A_95_P051021 | BP132543     |
| 44603 | 525 | 63 | 392  | AGATCTATCGCCTCACTTACTATGGCAAAGGGAGAATGCCAGGATTTGGTCAGAATT    | 43397 | A_95_P061765 | FG645308     |
| 44605 | 525 | 65 | 758  | GATTCGATCAACTTCAATGTCATTGCTATTTCAAAGAGTTAAAAGTGATGCACTCTGA   | 43401 | A_95_P117567 | DV160506     |
| 44613 | 525 | 73 | 435  | TCATATATTTGTGTCCTGAGCCTTATCCTGAGGAAAATTTGGAGTTTCTTGAATTAAC   | 43416 | A_95_P001396 | FG642013     |
| 44618 | 525 | 78 | 709  | TTCTTGCTGCTCGGATTACTTGCTCCACTGTGTGTTGGAGGCAATTAATCCGCAATG    | 43426 | A_95_P179257 | FG163565     |
| 44640 | 526 | 15 | 789  | AACTGAACATACGACTGCAATTCCTTTAATTGCTAGATGCTGAAATTAGTCGCTGTCA   | 43303 | A_95_P191807 | TA15316_4097 |
| 44643 | 526 | 18 | 397  | AAATACCAGTTGAAATAGAGACTCCAGATCACCCTACTATCATCTTGCTTTTTCAC1    | 43309 | A_95_P050256 | FG641345     |
| 44648 | 526 | 23 | 1566 | TCAGCAACTATTGCCTTATATGTCGAAAAGTGTGCTGCAAAATCAATCTTTGCCAAT.   | 43319 | A_95_P034703 | AY433959     |
| 44649 | 526 | 24 | 734  | GACGGTTCAGGCTTGAGTATGAGTTTGTGTTTCTAAAGTTGTTCTTTTAGGATTT(     | 43321 | A_95_P070135 | DV159788     |
| 44652 | 526 | 27 | 797  | AGAAGCTGAAGTTTTCTGTTACTATCTTCTGCTGCTCAGCATTTAACAGCACTATTTA   | 43327 | A_95_P180142 | DV157719     |
| 44654 | 526 | 29 | 552  | CAATTCAGAAATACAGATTGTAATATTAGATGTTACGATATCAGTGCCATTGGTTC     | 43331 | A_95_P138742 | EB442458     |
| 44657 | 526 | 32 | 524  | AATGAGAGAAGCAAGTAAACTTGCCTCCCCGACTTGACTTGATGTGTTCTGGTTATT/   | 43337 | A_95_P197082 | TA16484_4097 |
| 44661 | 526 | 36 | 209  | AGACAAAATGGGAAGAGAAAATTTTTGCTGGCATTGGTTCACGACAAGGGGAGACT(    | 43345 | A_95_P155092 | EG649893     |
| 44667 | 526 | 42 | 867  | GTGTAACCTCATGTTTTAACTCCAGTACTGTTCTGGTCTCCTGCTATTCTTCTTTATGC  | 43357 | A_95_P007986 | DV157830     |
| 44675 | 526 | 50 | 1842 | GATCCAAAGCCTAGAGTAACACTACCTCACCACAGAAGAAGGATGTCTGATCTACTC    | 43373 | A_95_P017461 | AB003037     |
| 44681 | 526 | 56 | 216  | GCAGTACATGAGCTAGGATGGGAGTAATTTACATATTGGTTAAAGATTGTACAGCTT    | 43385 | A_95_P129722 | TA18797_4097 |

|       |     |    |      |                                 |       |              |              |
|-------|-----|----|------|---------------------------------|-------|--------------|--------------|
| 44682 | 526 | 57 | 224  | TCTCCAACATATTATCCTTTTTGGACTGAGA | 43387 | A_95_P139742 | EB443650     |
| 44683 | 526 | 58 | 587  | AATGCATATCTGATGAAACAATGAAGACG   | 43389 | A_95_P017796 | BP136685     |
| 44685 | 526 | 60 | 713  | TTGCTCTGCTGTACTAGCCAAGACTTGT    | 43393 | A_95_P127692 | EB427243     |
| 44687 | 526 | 62 | 828  | TGTCTGAGCTTTGAGTACTTCTGGGCAT    | 43396 | A_95_P012786 | EB446058     |
| 44690 | 526 | 65 | 783  | GTGACTGAGGACTGAGAACAATTCGAAT    | 43402 | A_95_P193352 | TA15651_4097 |
| 44691 | 526 | 66 | 545  | GATGGAGTATTTGAACCTTGGGATTTAT    | 43404 | A_95_P108832 | FG152141     |
| 44692 | 526 | 67 | 807  | CTGGCTTGCACTGAGAAGTGATAAAAT     | 43406 | A_95_P188547 | TA14596_4097 |
| 44693 | 526 | 68 | 979  | GGGTAATTATGTGCAATGCTCTCAACA     | 43408 | A_95_P195512 | TA16133_4097 |
| 44694 | 526 | 69 | 872  | CATTTACCTTTTCAGAAAACAATTACT     | 43410 | A_95_P206142 | TA18443_4097 |
| 44696 | 526 | 71 | 822  | GAGGATCTGGTCAATCTCCAACCTGGT     | 43414 | A_95_P244767 | DV161566     |
| 44699 | 526 | 74 | 440  | ATTAACGAGTTGCCTTGGCACAAGGT      | 43419 | A_95_P173287 | EH665571     |
| 44700 | 526 | 75 | 2152 | CAGGGCTCTGCTCTTATAGACAAGTAT     | 43421 | A_95_P127302 | AY248907     |
| 44719 | 527 | 9  | 788  | ATGCGAAAGGCAATCGCCAAGTCTTCT     | 43427 | A_95_P070295 | TA18690_4097 |
| 44720 | 527 | 10 | 514  | GAAGCTCGTGCACCTTGTGACTCCAGT     | 43429 | A_95_P207747 | EH622203     |
| 44721 | 527 | 11 | 1002 | CGATTGATGAAGCTTCATAAATTTGG      | 43431 | A_95_P203352 | TA17836_4097 |
| 44722 | 527 | 12 | 655  | GGTTGGCTTAAGCAATTATTGCAGCA      | 43433 | A_95_P002346 | TA12017_4097 |
| 44727 | 527 | 17 | 721  | AATATCATGATTGCTTTGTACGAGT       | 43442 | A_95_P126497 | EB425818     |
| 44730 | 527 | 20 | 861  | AGCAGTACATGCTGCTGTACCATTCA      | 43448 | A_95_P224747 | EB425191     |
| 44738 | 527 | 28 | 781  | CGGAGTATTACCAAGGACAAAGA         | 43464 | A_95_P126647 | EB425991     |
| 44745 | 527 | 35 | 881  | GTGTCCTTTTTACGTATATATAGAT       | 43478 | A_95_P198837 | EB678922     |
| 44748 | 527 | 38 | 813  | CATGACAATTAACATATGTTGGTTT       | 43484 | A_95_P199517 | TA17011_4097 |
| 44751 | 527 | 41 | 671  | CGATTTGGCGAATTGTGCAAGCAGT       | 43490 | A_95_P286133 | EB446708     |
| 44753 | 527 | 43 | 809  | GAAGCATATCAAAGAGGAAGTGCAG       | 43494 | A_95_P025976 | TA18770_4097 |
| 44754 | 527 | 44 | 632  | GGGAAAGGAGTAACCTTTATTTTC        | 43496 | A_95_P155377 | FG633779     |
| 44758 | 527 | 48 | 319  | CAGAGCCTGCAACTTGAAAAATTTG       | 43504 | A_95_P143157 | EB446501     |
| 44760 | 527 | 50 | 706  | TACTTACACCATGGCAAGCCATTGAA      | 43508 | A_95_P316163 | EB424895     |
| 44761 | 527 | 51 | 322  | TCAGTACTACCAGTCTTGGGAGGTT       | 43510 | A_95_P308918 | FG643982     |
| 44765 | 527 | 55 | 777  | CGTTGTTATTACCTGTTTTGCACAT       | 43518 | A_95_P199352 | TA16976_4097 |
| 44767 | 527 | 57 | 421  | TCTTATTTACACCTTATTTGGTCA        | 43522 | A_95_P093033 | BP532114     |
| 44779 | 527 | 69 | 517  | AATGTAGTGAGGGTGTCGTTCTTT        | 43545 | A_95_P307053 | FG637202     |
| 44782 | 527 | 72 | 780  | ATTTGCGACACGTGACATTAAGGCG       | 43551 | A_95_P241475 | FG147699     |
| 44783 | 527 | 73 | 824  | CTAGCACTAGCGCTCCAACCTCTG        | 43553 | A_95_P234424 | DW003168     |
| 44784 | 527 | 74 | 902  | CTACTCTGCTTCGAATACTTAGT         | 43555 | A_95_P009006 | X95752       |
| 44806 | 528 | 11 | 656  | AAATTTGAAGGTCCGCCGTCTCGCT       | 43432 | A_95_P103977 | EB425907     |

|       |     |    |      |                                                   |       |              |              |
|-------|-----|----|------|---------------------------------------------------|-------|--------------|--------------|
| 44812 | 528 | 17 | 849  | TGCAATAATGCTTTTCGGGATAGTGCATTTGGTTTTCTGGATAGTGC   | 43443 | A_95_P263871 | EB425395     |
| 44815 | 528 | 20 | 877  | TTTTGACGCCATTGTTGTTTCATGGGTCAAAGCTAAAGAATAATTGATA | 43449 | A_95_P177212 | TA11913_4097 |
| 44820 | 528 | 25 | 825  | TCTGCTTGTTGTTGCTTGATGCATTCTCTAAGTAGCTCGTGCCGTTTT  | 43459 | A_95_P271061 | EB450067     |
| 44822 | 528 | 27 | 723  | CAAGTGGAACCAATTTTCATGAAGTTTTTCAAATTTTCATAGGAAGGT  | 43463 | A_95_P268556 | EB451235     |
| 44824 | 528 | 29 | 433  | GAGCACAAACGGAGCCCCATTATTCTTTACTTAAAGCTGAGTTATCAC  | 43467 | A_95_P143742 | EB446946     |
| 44826 | 528 | 31 | 540  | TGCGGCTATTTGGCAATTCCAAATTTTTGATATATTTTGAATGAGATT  | 43471 | A_95_P205737 | TA18354_4097 |
| 44833 | 528 | 38 | 207  | TGTAAAGTTGAGGAAACGCCGAAAGGGTGGTTTATTACATACATTGAT  | 43485 | A_95_P141962 | EB445556     |
| 44835 | 528 | 40 | 175  | CCGTAGCTCCTGTAGATGTAGAGTTCTATTTTCAGAATTTCTGTACA   | 43489 | A_95_P092683 | BP531930     |
| 44836 | 528 | 41 | 418  | TCAACAAATTCAGGATATGAAATCCTGTCCTCATCATTACGAGGAAAC  | 43491 | A_95_P100668 | BP535479     |
| 44837 | 528 | 42 | 703  | GTGTTCATAGTTTGTTCGATCTTTGTGAAATGAATTTCCGTTCCGAA   | 43493 | A_95_P221487 | TA21829_4097 |
| 44839 | 528 | 44 | 185  | TGGGTTTACTCCAAATCTCCTTGATCTGGAGCTGATGAAGGTGAAAT   | 43497 | A_95_P154662 | EG649695     |
| 44842 | 528 | 47 | 1576 | GAACGAGCTTTGTTATTGAGAATCGGATAATATGGATTAGTAGCATCT  | 43503 | A_95_P026186 | TA15524_4097 |
| 44845 | 528 | 50 | 768  | GAGTTGCAAATCGCTTATTTTCGACAGGGACATTGCAATATCAGCAAG  | 43509 | A_95_P145422 | EB449176     |
| 44847 | 528 | 52 | 237  | TTTAGCTGTAGCAGTTTTTACATGTACATCCTGATTAATTCATGGTGT  | 43513 | A_95_P114897 | CV021809     |
| 44853 | 528 | 58 | 700  | TGTAAACAGTAGTTTCATATCATATGTGCAAATCATGCATCACTGCTC  | 43524 | A_95_P220332 | EB445616     |
| 44855 | 528 | 60 | 613  | CATTTGGTGTACTGATGTTAGGCTATATGCCCAATTCTACAGAAAGAC  | 43528 | A_95_P177657 | TA12037_4097 |
| 44857 | 528 | 62 | 356  | TGTAAATTTGTAGCCTTAGTGTGGCAAGTACTTTAAACTGTTTCTTCG  | 43532 | A_95_P090403 | BP530937     |
| 44858 | 528 | 63 | 476  | CGTTCATCTTTGGTACTGTTAAACATGTCTGGAAATCCGTTACTTTA   | 43534 | A_95_P021871 | TA15047_4097 |
| 44866 | 528 | 71 | 855  | CTCCCCTCTGTTTTCTGTGGCGCATAGGTTGTACATTGTAATAATTT   | 43550 | A_95_P116902 | DV159682     |
| 44868 | 528 | 73 | 1717 | GTAATAGTAGGCATATGAGGGGAGGGATTTTACACATATTTATATAT   | 43554 | A_95_P259246 | AY366400     |
| 44891 | 529 | 11 | 222  | TGCTTTGTTTGTAAAGGAAGAGCTTGATTGTTGGCCAGAACAGAACCC  | 43563 | A_95_P090778 | BP531089     |
| 44892 | 529 | 12 | 1371 | ACCTATTGACAAGCTCATAAAGGTGGGCATTTGCTAATATATGGTGTT  | 43565 | A_95_P237714 | U81312       |
| 44895 | 529 | 15 | 458  | CACATTGTTGACATTCAGTAACCTCACCTAACAGGAGATACAAGTTTAC | 43571 | A_95_P023646 | DW002686     |
| 44896 | 529 | 16 | 730  | GGATTTGGTTTTGTTGTGTACGTGGTTTGAACATTTCTGGTTAAGTA   | 43573 | A_95_P236574 | DV160976     |
| 44900 | 529 | 20 | 562  | GAGAGGTTTGAAGAAAATTTGGGAAAACGTCAACGACTCCTAGCTTAT  | 43581 | A_95_P020901 | TA21374_4097 |
| 44901 | 529 | 21 | 89   | CTCTTCAGCATTTGATCTGTCAAATGAATCGGCCTCCCTCTCCTAAT   | 43583 | A_95_P042581 | BP130396     |
| 44902 | 529 | 22 | 551  | ATAAATGTACTCCTTCGATTTAGTTGTTGTTGTATCCTAGTCTACGAC  | 43585 | A_95_P139882 | EB443800     |
| 44903 | 529 | 23 | 485  | CGAACATTGAATTCTATGGCATTGTCACTTGCAAGTTTGGTATACATG  | 43587 | A_95_P096443 | BP533628     |
| 44910 | 529 | 30 | 1775 | GCGAGTGTTAGTATTGGGACTTCTTTGTCAATTTTATAACATGTCGTC  | 43601 | A_95_P195317 | TA16089_4097 |
| 44912 | 529 | 32 | 875  | AAGAGCAAAATGAGTTTCAGGTCTGTACCTCGTGATTTTGGTAGGGC   | 43605 | A_95_P215192 | TA20431_4097 |
| 44913 | 529 | 33 | 866  | ACCTCATGGATCTTCTTGGTAGAACAAATTTTCAAATGAACAACCAA   | 43607 | A_95_P245687 | DV162199     |
| 44914 | 529 | 34 | 543  | GGGCAATGCGGAAGGAAGTCTGAGATATGGACATTTTCTTTGAATTT   | 43609 | A_95_P026816 | BP133938     |
| 44918 | 529 | 38 | 523  | ATTAGATCGAAGATTCAGTGCCTAGTTGAGGTACAAGTGTGTGGATCA  | 43617 | A_95_P208872 | EB681754     |
| 44919 | 529 | 39 | 848  | CCTTTCCTGAGGAAGAACTTCGTAGTTTAAATATCTGAACAGTGGAAG  | 43619 | A_95_P297263 | EB682547     |

|       |     |    |      |                                                             |       |                           |
|-------|-----|----|------|-------------------------------------------------------------|-------|---------------------------|
| 44920 | 529 | 40 | 1054 | AATAGGTAAGAAGTGCTCAGCAAAGAACCTGCCTAAGTCTTGTGCAATTTCTTCTTTT  | 43621 | A_95_P108132 TA12400_4097 |
| 44926 | 529 | 46 | 1778 | TTTTATGGACTTGATGGCGGTTTTCCCTTTGTGATATTGTTAGACAACCCGATGTCTA  | 43633 | A_95_P238424 AF137288     |
| 44930 | 529 | 50 | 443  | TGGATGCTAAAATTTTGTGCTTCATGACACTTTTCATTTGCACAAGTGTGACAACATG  | 43641 | A_95_P058486 FG172441     |
| 44937 | 529 | 57 | 261  | ACTTTGAACAATATCACAGAGATACGAACGGATGCACCTAAATTGCTTGCCATGTTA/  | 43655 | A_95_P075795 EB678149     |
| 44938 | 529 | 58 | 351  | TTTGACCTTTACGATCAAGACCATAACGGCTTGATTACTGCTGCGGAGCTCCAACAA   | 43657 | A_95_P111637 CV020289     |
| 44942 | 529 | 62 | 343  | GTCTGATTGTTTTGTTGTCTAGTACCTACAGCAAATGGTGTGTTAGATTTTATG      | 43665 | A_95_P094583 BP532783     |
| 44951 | 529 | 71 | 1065 | CCTTTGAAAGCCATTACTTAAAACAACCTCAGTCCATCTGATCTACAATTGGATCATA/ | 43682 | A_95_P181927 TA13095_4097 |
| 44954 | 529 | 74 | 116  | CATGGATTGCTGAAGACGATCGGTATGTTACAGTTGTTGAATGATTTTATACTGGTTT  | 43688 | A_95_P106177 CV017785     |
| 44955 | 529 | 75 | 148  | GACGTTGATGATGATCTAGTTTATCTATATTTACGTCGCCGATTTGGACTTAGTATT   | 43690 | A_95_P106497 CV017921     |
| 44975 | 530 | 10 | 1392 | GGGCAGATGCTTCCTGTATTGATTTCCGTTTTGATATCTTTTACAATCCACAAAA     | 43562 | A_95_P239724 AY619953     |
| 44983 | 530 | 18 | 683  | GTTACTGGTTTTGTTGGGTCATATTTACTTGCTAGACAGATGTGTTGCTTAAAGTAA/  | 43578 | A_95_P121657 DW001777     |
| 44984 | 530 | 19 | 656  | ATGATCTTTTGTATCCAAATTTGAAGCTCTTCTGTGCGTCCATGAGACCGAAT       | 43580 | A_95_P023331 FG163977     |
| 44986 | 530 | 21 | 728  | TTTGGGTAATGACACTACTGCAAGCTAGCGCTTATCATTCTTGACTTCGACTTCAGG   | 43584 | A_95_P288708 FG194389     |
| 44988 | 530 | 23 | 526  | CAGAGAAAAATGCTTGGTAAATATGGTCTGGTGGAGAAATTGGGAAACCTGAGTT     | 43588 | A_95_P086425 BP529534     |
| 44989 | 530 | 24 | 798  | ATCCACGATGACTGGTCTGAGACCCTGAAACACCAGCATTTATCAAAGCATGTTTGC   | 43590 | A_95_P235039 FG143827     |
| 44993 | 530 | 28 | 923  | ATTTACTAAGGAGATTTAACAGTTGTTCAAGTCGTGCTTGTAGCTTCTCTTCTACTGA  | 43598 | A_95_P181387 DV999233     |
| 44997 | 530 | 32 | 148  | TCTTCTCGTCATGTTACCTCGCCGAAACTTCTAAAGCTCTAGATCGGGTCAAAACA    | 43606 | A_95_P106312 CV017860     |
| 44999 | 530 | 34 | 1137 | GTATGATGTGGATCTTAGATTTTGGACCTATAGATTTCTGTAAGTGTCTTATTGAA/   | 43610 | A_95_P191157 TA15168_4097 |
| 45002 | 530 | 37 | 646  | CTCTATAGCATGTCAATTTGCATTGCTGTCAACACCTCTTTTCTCCACACTGAAAA    | 43616 | A_95_P064480 BP136066     |
| 45003 | 530 | 38 | 901  | ATTTGAATTCCTTGGGGATCTCATTAGCATTATCTGCTATTCCTGTGCGATTTTAGTT  | 43618 | A_95_P000386 DV157743     |
| 45004 | 530 | 39 | 430  | GCACTGTGTTTTGGCAGAAGTGATGAGTTTGTGCGAGTTCAAGACTTCTCTCTCTACA  | 43620 | A_95_P020986 BP533513     |
| 45007 | 530 | 42 | 455  | CCGCATACAGTATATTTGATATGTTTCATCATTGCGTCAAGTAAAATGACAGACACAT  | 43626 | A_95_P073315 BP526186     |
| 45010 | 530 | 45 | 453  | TTTCCGGTCCAAGCCAGTGCATATAGGAAAGCATGCCTTAGAACAGTTGTCTTTCTTA  | 43632 | A_95_P049116 BP132086     |
| 45015 | 530 | 50 | 835  | TTATAGGGACAAGATTAAGAGTCTTGAAGATGTTTAGTGATTGGATTTGGAGGTG/    | 43642 | A_95_P125797 EB424893     |
| 45016 | 530 | 51 | 691  | GTAGGATAACCATTTTTGTACCATATCTTTTTAGTAGGGAAAGGCCCTGAATGACCA   | 43644 | A_95_P152927 EB683252     |
| 45017 | 530 | 52 | 1086 | TGTAGGAACGCTTGCAAAGATTGATCATAAAGTTGGACACTTGTTCTGTTTTCTGCCT  | 43646 | A_95_P204267 TA18029_4097 |
| 45019 | 530 | 54 | 683  | CTACATTGGATCCTGACAACATAGTGAATAATTGTACAAACATTTGTCATCTGATAGAC | 43650 | A_95_P196042 TA16253_4097 |
| 45026 | 530 | 61 | 759  | CAAGAGATTCGACTCAGGTATATTAAGGCTATCCCTTCTTTCTTTTCGTCATGATCTAT | 43664 | A_95_P135497 EB438990     |
| 45032 | 530 | 67 | 790  | TGATGGCAAGCTGGTTGGGATTATACAAGGGGCAATGTTGTTAGAGCTGCTCTACA    | 43676 | A_95_P146217 EB441030     |
| 45035 | 530 | 70 | 291  | GGCTTTGTCTTAGTAAGAATTATTGCTCAGAATTTTGCAGTACTAATTGGTTTTACCC  | 43681 | A_95_P002166 TA12144_4097 |
| 45062 | 531 | 12 | 947  | CCCTTTCCATTGATAGATCAATTTCAGAAGCAGATAAAAATTAACCACCTTGTGCTT   | 43693 | A_95_P201937 TA17527_4097 |
| 45064 | 531 | 14 | 738  | ACTGACTTGTGGAACAGCATGACCAATTTGTTGGCTTATGCAATCTGTTTGGCAA     | 43697 | A_95_P299713 FG194432     |
| 45065 | 531 | 15 | 788  | CAGTGGGAGTTTGTCAAGGTAAGTTGCATTGTGGAATAAACTGATCTCCAGTTGCTG   | 43699 | A_95_P159207 EH617171     |
| 45078 | 531 | 28 | 391  | TACTGATTGGAAGCTGTCCCACTCATGACAATTATTGCACCAGCTTCTGAATTTAA/   | 43725 | A_95_P204742 TA18129_4097 |

|       |     |    |      |                                                             |       |              |              |
|-------|-----|----|------|-------------------------------------------------------------|-------|--------------|--------------|
| 45082 | 531 | 32 | 786  | ACAGCGCGAACACCAGCAGTCAAGTAGAGCAATGCCACAATGTCATCTAAGATTTT    | 43733 | A_95_P136242 | EB439893     |
| 45083 | 531 | 33 | 488  | GCTTAGGCCGAGGGGATCTAAGTATAGTGGATCAACTTGCTTGAGAAACATGTGATT   | 43735 | A_95_P055606 | BP133743     |
| 45087 | 531 | 37 | 366  | CAAAACCACCATGGATGTTGTTTCTAATGCTAGCTGTACTACCAATTGCCTTGCTCCC  | 43743 | A_95_P127337 | EH665096     |
| 45088 | 531 | 38 | 362  | CAAGTAGATGTGGCATCTAAACTACAAGCGGAGGCCGTCTGCCTCAATGAAAAGAA    | 43745 | A_95_P277558 | AM789373     |
| 45089 | 531 | 39 | 46   | AAAGAGAAGTCTATTCGCCAAGAGTATAAACTGGGGCAACTCTTAGAAAAGTTCAA    | 43747 | A_95_P131997 | EB432437     |
| 45093 | 531 | 43 | 1330 | GGAGTCTCCCATCGAAATGACTTCAACACTTTGTAACTATTTATCCGTTACATTATG   | 43755 | A_95_P021861 | AB433897     |
| 45097 | 531 | 47 | 360  | CTGAGACTTGACTTGTTCTTCAGTTTTTTAGATACAGGGAGTAGTATACTACTAATGA  | 43763 | A_95_P094523 | BP532761     |
| 45099 | 531 | 49 | 421  | AATGTGAAGGAAATGGCAGATTTCTCCTCGAAACTATTATCGTGGCTTGATGACATG   | 43767 | A_95_P080325 | BP527977     |
| 45101 | 531 | 51 | 840  | GAAAACCGCTTACAACAGTTCAAGCTACCAGAACCGGTACTTTGCATTGGTGGATAT   | 43770 | A_95_P291703 | EB424646     |
| 45103 | 531 | 53 | 254  | ATCGGAGTCTTGTAATTGCCTTCGTATTAACCTCCGGGTTTTGATATGATCAGTTTTT  | 43774 | A_95_P052916 | BP133046     |
| 45104 | 531 | 54 | 747  | GGGCTATTGATAGACTGTTGAAAGTGATTAAGATGCCACATCCAGTACCAGAAGTGT   | 43776 | A_95_P148397 | EB677705     |
| 45106 | 531 | 56 | 468  | ACACGTGACTCTCCGAATTCCTGGGCTTCCAAAATCCAATAGCTCAAAGAAGGCTAA   | 43780 | A_95_P039416 | BP129542     |
| 45108 | 531 | 58 | 1488 | GACGGTATAAAGCATAAATGATCTTATGTTCTATTGAAGGGTTTGTATTTGACTGGA   | 43784 | A_95_P196927 | TA16450_4097 |
| 45109 | 531 | 59 | 532  | ACATGTTAGTTCTTGAAAAAGGTGCCCTGAGAAAAACTCTTTTCTCAAATAATCA     | 43786 | A_95_P069045 | DW001751     |
| 45111 | 531 | 61 | 689  | AACACAGCAACAACCCATAGTACATGTCCAAGTCCAACCTTTACTTAAACTAGATTAA  | 43790 | A_95_P001981 | FG645246     |
| 45112 | 531 | 62 | 945  | CTGGTTTCTATTTAAGGCTACTCATTGTTTCACTGAAACTGGTACTCAATGTGCAAAGA | 43792 | A_95_P200712 | TA17265_4097 |
| 45113 | 531 | 63 | 1371 | AGGATTAGGAATGAAACTGATAATCCGCTGCAGTATGTAGATCAGTTAGATGTTCGA   | 43794 | A_95_P217567 | TA20962_4097 |
| 45114 | 531 | 64 | 481  | ATTGCGTGATGACTGGAACGGATTATTGTGGCTATGTTGTAATAGATGTCAAATT     | 43796 | A_95_P221092 | EH614536     |
| 45116 | 531 | 66 | 550  | AATGGTGAAAGAGCTGAATGTGTATGTATCTTCAACATCAAATGATTGGAACCTC     | 43800 | A_95_P218857 | TA21267_4097 |
| 45121 | 531 | 71 | 307  | ACCTCCAGTTTCCAAAGGGGCTAAATTTCACTCTCAGAATAAGACTGCAGTTCCTGCT  | 43810 | A_95_P070415 | BP192630     |
| 45123 | 531 | 73 | 621  | TTTTACGCTGAGGGGAAGGTATATTGTGTTGAAGGTTCCATTCCCTTTTTCTCTGA    | 43814 | A_95_P069725 | BP137467     |
| 45147 | 532 | 12 | 905  | GTTGGTTATGTATGAGCAGTAAAATGTCAAGTCTTTCATTAACTATGCTTGTTTTCTC  | 43694 | A_95_P193257 | TA15632_4097 |
| 45151 | 532 | 16 | 451  | TTGGGGAATAAGGCTACAAATAATCAGATCATACTCAGTGTAGCCATTGTCTTATTG   | 43702 | A_95_P077755 | BP135562     |
| 45152 | 532 | 17 | 673  | TTATTTGATCACTCGAAAGCAAGAAGCTTGGATCACTTATGGTTGCCTTGTTCTGTT   | 43704 | A_95_P316263 | TC50772      |
| 45156 | 532 | 21 | 795  | GAAATGGCTCTGTAATACTACAGTTTGGAAAATATGCAATGATGTTTGTCTAGGTTCA  | 43712 | A_95_P009446 | TA12124_4097 |
| 45158 | 532 | 23 | 1215 | GAAATGATGATCGAAAAACAGCCTCTGGGTCATTTATCTCATAAACATCTGACGTG    | 43716 | A_95_P209167 | TA19131_4097 |
| 45162 | 532 | 27 | 316  | ATCTAAGCAATGCCGGAAGCCACAAAGAGGGCCAACCTTGCTGCGTTTTGGTAACAAAC | 43724 | A_95_P114507 | CV021641     |
| 45163 | 532 | 28 | 909  | AAGTGCAGAGGACAATGCTCGAACTTCTGAATCAGCTTGATGGATTTGAGGCATCAA   | 43726 | A_95_P215522 | TA20505_4097 |
| 45166 | 532 | 31 | 554  | GCAGATCGTCCTATTATCCCTTTCCCATAGTGTGTACAAGTAGATTTTTTGCGAAAAG  | 43732 | A_95_P123517 | DW003368     |
| 45167 | 532 | 32 | 723  | AAAGTAAAAACAGAAACGGATGCCAAACCTGGGAAAGATGAAACTCCGTCTACTGC    | 43734 | A_95_P242882 | EB445623     |
| 45169 | 532 | 34 | 713  | TCTGATGACTGCTCCATATGACTCCTAAAGACATGGTGGTGTGTGTTCTCGCTTTC    | 43738 | A_95_P256469 | EB447983     |
| 45173 | 532 | 38 | 232  | GAGTAGTGTTTTTGTCCTAAGGGCACTGAATTGAGATTCTGATATCCGATTTTTTGT   | 43746 | A_95_P184022 | TA13594_4097 |
| 45174 | 532 | 39 | 786  | ATCTCATAACTGATTGAGGTGGTACAGGAGGACTGGATGGCAGGTGAAGCTTTTCA    | 43748 | A_95_P235919 | DV158264     |
| 45182 | 532 | 47 | 822  | TTTTGGCACGACCATGAACATTCTCTACGGTGATAGTGTGTTGTTGGTCAAGGTGGTGT | 43764 | A_95_P229795 | EB438532     |



|       |     |    |     |                                                            |       |              |          |
|-------|-----|----|-----|------------------------------------------------------------|-------|--------------|----------|
| 45191 | 532 | 56 | 407 | TCAATCCACTAGCTCCCTAGGAAGTTTTGTCGCTTATTATGTACTGGGACTAGCAGCA | 43781 | A_95_P096578 | BP533685 |
| 45193 | 532 | 58 | 117 | TCCATTGAAGCAACTTGGATGTCTTCAGTCTTTTTGCCTCTGCATAGCGCAGTAGCA  | 43785 | A_95_P208732 | FG633958 |
| 45200 | 532 | 65 | 219 | ACAGCGTTTACCGTAAGTGAAGTTCAGGCATTATTTGAGATGTTCAAGACTATTAGC  | 43799 | A_95_P101813 | EB681917 |
| 45201 | 532 | 66 | 821 | TAGTCAATCAAATATAAGATGGGTCACTGTCTCAGCAGCAGCGCTAGAAGCAGAGA   | 43801 | A_95_P304403 | FG158815 |
| 45207 | 532 | 72 | 734 | AGAGGAAGGACTTGCCATGATTGATGATGGTCCACATAGATGGAAGACGTCGATACT  | 43813 | A_95_P224857 | EB451913 |

| Description                                                                          | PT24     | Det Call - WAB |
|--------------------------------------------------------------------------------------|----------|----------------|
| gb KL4B.113B11F.060131T7 KL4B Nicotiana tabacum cDNA clone KL4B.113B11, mR           | 28.61    | 1              |
| Unknown                                                                              | 82.66    | 1              |
| tc Rep: Chromosome undetermined scaffold_30, whole genome shotgun sequence           | 29.26    | 1              |
| gb 29G06 Transformed tobacco Lambda Zap II library Nicotiana tabacum cDNA 5', r      | 513.64   | 1              |
| tc Rep: Chromosome chr12 scaffold_18, whole genome shotgun sequence - Vitis vi       | 92.35    | 1              |
| gb KN6B.105E07F.060104T7 KN6B Nicotiana tabacum cDNA clone KN6B.105E07, m            | 25.93    | 1              |
| gb KT7C.109D22F.051221T7 KT7 Nicotiana tabacum cDNA clone KT7C.109D22, mRl           | 97.58    | 1              |
| tc Rep: Chromosome chr15 scaffold_19, whole genome shotgun sequence - Vitis vi       | 18.75    | 1              |
| gb KF8C.103A06F.051214T7 KF8 Nicotiana tabacum cDNA clone KF8C.103A06, mRN           | 507.33   | 1              |
| gb KT7C.112E04F.051221T7 KT7 Nicotiana tabacum cDNA clone KT7C.112E04, mRN           | 49.29    | 1              |
| gb AM817961 COL, cold overnight library Nicotiana tabacum cDNA clone nt006115        | 22.75    | 1              |
| gb KL4B.104M22F.051104T7 KL4B Nicotiana tabacum cDNA clone KL4B.104M22, m            | 106.45   | 1              |
| tc Rep: Chromosome chr18 scaffold_24, whole genome shotgun sequence - Vitis vi       | 643.54   | 1              |
| Unknown                                                                              | 18.9     | 1              |
| tc Rep: Hydroxy-methylglutaryl-coenzyme A reductase - Nicotiana tabacum (Comr        | 5245.78  | 1              |
| gb KF8C.104I01F.051214T7 KF8 Nicotiana tabacum cDNA clone KF8C.104I01, mRN/          | 67.71    | 1              |
| tc Rep: Fructose-bisphosphate aldolase - Solanum tuberosum (Potato), partial (65%    | 384.65   | 1              |
| gb AM798722 seedling library, SL Nicotiana tabacum cDNA clone nt002106047, mF        | 26.3     | 1              |
| Unknown                                                                              | 99.38    | 1              |
| Unknown                                                                              | 54.75    | 1              |
| tc Rep: Blue-light photoreceptor PHR2 - Arabidopsis thaliana (Mouse-ear cress), pa   | 27.1     | 1              |
| tc Rep: Polypeptide with a gag-like domain - Petunia hybrida (Petunia), partial (9%) | 190.91   | 1              |
| gb AM807618 seedling library, SL Nicotiana tabacum cDNA clone nt002189039, mF        | 57.28    | 1              |
| Unknown                                                                              | 20617.25 | 1              |
| tc Rep: Transformer-SR ribonucleoprotein - Nicotiana tabacum (Common tobacco),       | 512.76   | 1              |
| gb CHO_SL024xm08f1.ab1 CHO_SL Nicotiana tabacum cDNA, mRNA sequence [EHf             | 42.25    | 1              |
| tc Rep: Chromosome chr1 scaffold_84, whole genome shotgun sequence - Vitis vin       | 185.4    | 1              |
| Unknown                                                                              | 31.08    | 1              |
| Unknown                                                                              | 22.86    | 1              |
| Unknown                                                                              | 406.13   | 1              |
| tc Rep: TGB12K interacting protein 3 - Nicotiana tabacum (Common tobacco), com       | 85.99    | 1              |
| gb KR3B.111G01F.060119T7 KR3B Nicotiana tabacum cDNA clone KR3B.111G01, m            | 19.99    | 1              |
| Unknown                                                                              | 1115.99  | 1              |

|                                                                                      |          |   |
|--------------------------------------------------------------------------------------|----------|---|
| gb CHO_SL028xe24f1.ab1 CHO_SL Nicotiana tabacum cDNA, mRNA sequence [EH6             | 174.43   | 1 |
| gb KL4B.105N10F.051104T7 KL4B Nicotiana tabacum cDNA clone KL4B.105N10, mF           | 23.79    | 1 |
| tc Rep: BZIP transcription factor bZIP122 - Glycine max (Soybean), partial (26%) [TC | 73.56    | 1 |
| Unknown                                                                              | 33.26    | 1 |
| Unknown                                                                              | 53.52    | 1 |
| gb KF8C.102C07F.051214T7 KF8 Nicotiana tabacum cDNA clone KF8C.102C07, mRN           | 90.47    | 1 |
| tc Rep: Formate dehydrogenase, mitochondrial precursor - Solanum tuberosum (Pc       | 28.01    | 1 |
| tc Rep: Glycolate oxidase - Solanum lycopersicum (Tomato) (Lycopersicon esculent     | 51.45    | 1 |
| tc Rep: Chromosome chr16 scaffold_86, whole genome shotgun sequence - Vitis vi       | 150.37   | 1 |
| gb TT-07_J04 K326 late senescent leaf library Nicotiana tabacum cDNA, mRNA seq       | 30.88    | 1 |
| tc Rep: Chromosome chr8 scaffold_88, whole genome shotgun sequence - Vitis vin       | 201.46   | 1 |
| tc Rep: Chromosome chr1 scaffold_75, whole genome shotgun sequence - Vitis vin       | 233.86   | 1 |
| Unknown                                                                              | 30.86    | 1 |
| gb AGN_RNC129xo20r1.ab1 AGN_RNC Nicotiana tabacum cDNA 3', mRNA sequenc              | 22.68    | 1 |
| gb TT-07_O10 K326 early senescent leaf library Nicotiana tabacum cDNA, mRNA se       | 29.94    | 1 |
| gb CHO_SL022xb18f1.ab1 CHO_SL Nicotiana tabacum cDNA, mRNA sequence [EH6             | 66.21    | 1 |
| gb KF8C.110D11F.051216T7 KF8 Nicotiana tabacum cDNA clone KF8C.110D11, mRI           | 191.67   | 1 |
| gb FS407121 normalized full-length tobacco cDNA library Nicotiana tabacum cDNA       | 1183.39  | 1 |
| tc Rep: Triosephosphate isomerase, chloroplast precursor - Spinacia oleracea (Spin.  | 418.38   | 1 |
| gb KR3B.105E15F.051109T7 KR3B Nicotiana tabacum cDNA clone KR3B.105E15, ml           | 51.81    | 1 |
| gb AGN_RNC114xj01f1.ab1 AGN_RNC Nicotiana tabacum cDNA 5', mRNA sequence             | 133.75   | 1 |
| Unknown                                                                              | 138.38   | 1 |
| gb KP1B.110G19F.050727T7 KP1B Nicotiana tabacum cDNA clone KP1B.110G19, m            | 61.46    | 1 |
| Unknown                                                                              | 33.56    | 1 |
| tc Rep: Chromosome chr13 scaffold_17, whole genome shotgun sequence - Vitis vi       | 1668.96  | 1 |
| Unknown                                                                              | 49.37    | 1 |
| Unknown                                                                              | 46035.85 | 1 |
| Unknown                                                                              | 22.37    | 1 |
| tc Rep: Chromosome chr10 scaffold_312, whole genome shotgun sequence - Vitis v       | 2826.88  | 1 |
| tc Rep: Chromosome chr6 scaffold_3, whole genome shotgun sequence - Vitis vinif      | 44.54    | 1 |
| tc Rep: Proteasome subunit beta type-1 - Petunia hybrida (Petunia), complete [TC6    | 72.22    | 1 |
| tc Rep: Chromosome chr13 scaffold_17, whole genome shotgun sequence - Vitis vi       | 24.48    | 1 |
| Unknown                                                                              | 69.56    | 1 |
| tc Rep: Chromosome chr4 scaffold_6, whole genome shotgun sequence - Vitis vinif      | 87.19    | 1 |

|                                                                                     |          |   |
|-------------------------------------------------------------------------------------|----------|---|
| gb CHO_SL015xd16f2.ab1 CHO_SL Nicotiana tabacum cDNA, mRNA sequence [EH6            | 2783.71  | 1 |
| Unknown                                                                             | 3211.75  | 1 |
| tc Rep: Chromosome chr14 scaffold_211, whole genome shotgun sequence - Vitis v      | 116.52   | 1 |
| tc Rep: Uracil phosphoribosyltransferase - Nicotiana tabacum (Common tobacco), I    | 26.23    | 1 |
| tc Rep: Expansin-2 - Petunia hybrida (Petunia), partial (52%) [TC59451]             | 231.24   | 1 |
| tc Rep: Chromosome chr5 scaffold_2, whole genome shotgun sequence - Vitis vinif     | 34.77    | 1 |
| tc Rep: At4g04200 - Arabidopsis thaliana (Mouse-ear cress), partial (84%) [TC5587C  | 536.93   | 1 |
| tc Rep: Chromosome chr8 scaffold_88, whole genome shotgun sequence - Vitis vin      | 24.81    | 1 |
| tc Rep: Chromosome chr11 scaffold_14, whole genome shotgun sequence - Vitis vi      | 39.08    | 1 |
| tc Rep: Protein BCCIP homolog - Arabidopsis thaliana (Mouse-ear cress), partial (42 | 31.2     | 1 |
| tc Rep: Chromosome chr17 scaffold_12, whole genome shotgun sequence - Vitis vi      | 2770.57  | 1 |
| tc Rep: Chromosome chr16 scaffold_10, whole genome shotgun sequence - Vitis vi      | 104.99   | 1 |
| tc Rep: Chromosome chr8 scaffold_23, whole genome shotgun sequence - Vitis vin      | 25.87    | 1 |
| gb Nicotiana tabacum S-adenosylmethionine decarboxylase mRNA, complete cds [I       | 13112.45 | 1 |
| Unknown                                                                             | 98.35    | 1 |
| tc Rep: Thioredoxin - Limonium bicolor, partial (64%) [TC42824]                     | 48.84    | 1 |
| tc Rep: Voltage-dependent anion channel - Nicotiana tabacum (Common tobacco),       | 241.45   | 1 |
| gb AGN_RPC019xj22f1.ab1 AGN_RPC Nicotiana tabacum cDNA 5', mRNA sequence            | 42.07    | 1 |
| gb AGN_RNC021xd11f1.ab1 AGN_RNC Nicotiana tabacum cDNA 5', mRNA sequenc             | 126.99   | 1 |
| Unknown                                                                             | 2121.79  | 1 |
| tc Rep: 3-hydroxy-3-methylglutaryl-coenzyme A reductase - Nicotiana sylvestris (W   | 11592.65 | 1 |
| Unknown                                                                             | 19.16    | 1 |
| Unknown                                                                             | 35.14    | 1 |
| gb TT-31_K08 K326 trichome library Nicotiana tabacum cDNA, mRNA sequence [FG        | 190.91   | 1 |
| gb KN6B.009M14F.050901T7 KN6B Nicotiana tabacum cDNA clone KN6B.009M14,             | 14483.65 | 1 |
| Unknown                                                                             | 31.61    | 1 |
| tc Rep: Chromosome chr5 scaffold_2, whole genome shotgun sequence - Vitis vinif     | 29.55    | 1 |
| gb AM791244 DL, diurnal library Nicotiana tabacum cDNA clone nt005034008, mRI       | 26.07    | 1 |
| Unknown                                                                             | 1476.92  | 1 |
| tc Rep: Pyruvate kinase - Vitis vinifera (Grape), partial (34%) [TC50143]           | 153.37   | 1 |
| tc Rep: Chromosome chr19 scaffold_4, whole genome shotgun sequence - Vitis vin      | 15143.15 | 1 |
| gb N.tabacum mRNA for c subunit of V-type ATPase (980 bp) [X95752]                  | 2861.12  | 1 |
| tc Rep: Chromosome chr6 scaffold_3, whole genome shotgun sequence - Vitis vinif     | 59.33    | 1 |
| tc Rep: ATP-dependent RNA helicase-like protein DB10 - Nicotiana sylvestris (Wooc   | 42.35    | 1 |

|                                                                                       |          |   |
|---------------------------------------------------------------------------------------|----------|---|
| gb KN6B.115P14F.060127T7 KN6B Nicotiana tabacum cDNA clone KN6B.115P14, r             | 51.47    | 1 |
| tc Rep: Chromosome chr2 scaffold_132, whole genome shotgun sequence - Vitis vi        | 695.46   | 1 |
| tc Rep: Chromosome undetermined scaffold_100, whole genome shotgun sequenc            | 29.17    | 1 |
| Unknown                                                                               | 28.14    | 1 |
| gb AGN_ELP024xn11f1.ab1 AGN_ELP Nicotiana tabacum cDNA 5', mRNA sequence              | 72.26    | 1 |
| tc Rep: Chromosome chr12 scaffold_57, whole genome shotgun sequence - Vitis vi        | 879.19   | 1 |
| Unknown                                                                               | 36.15    | 1 |
| tc Rep: Chromosome chr12 scaffold_36, whole genome shotgun sequence - Vitis vi        | 633.58   | 1 |
| tc Rep: Chromosome chr9 scaffold_7, whole genome shotgun sequence - Vitis vinif       | 30.69    | 1 |
| Unknown                                                                               | 51.88    | 1 |
| gb Nicotiana tabacum MADS box protein (Mads1;11) mRNA, complete cds [AY1837           | 10095.53 | 1 |
| gb KF8C.103P09F.051214T7 KF8 Nicotiana tabacum cDNA clone KF8C.103P09, mRN            | 129.61   | 1 |
| tc Rep: Alpha-tubulin 4 - Populus tremuloides (Quaking aspen), complete [TC44871      | 10251.15 | 1 |
| Unknown                                                                               | 34.85    | 1 |
| gb TT-05_A21 K326 trichome library Nicotiana tabacum cDNA, mRNA sequence [FC          | 195.16   | 1 |
| tc Rep: Thaliana 60S ribosomal protein L7 - Solanum tuberosum (Potato), partial (9'   | 51.27    | 1 |
| tc Rep: Thioredoxin h-like protein - Nicotiana tabacum (Common tobacco), comple       | 533.86   | 1 |
| tc Rep: Chromosome chr1 scaffold_5, whole genome shotgun sequence - Vitis vinif       | 355.38   | 1 |
| tc Rep: Actin-97 - Solanum tuberosum (Potato), partial (57%) [TC46429]                | 54331.4  | 1 |
| gb KF8C.104N24F.051214T7 KF8 Nicotiana tabacum cDNA clone KF8C.104N24, mRI            | 293.45   | 1 |
| tc Rep: Tonoplast intrinsic protein bobTIP26-1 - Brassica oleracea var. botrytis (Cau | 169.57   | 1 |
| tc Rep: Translationally controlled tumor protein like protein - Nicotiana tabacum (C  | 456.6    | 1 |
| tc Rep: Ferredoxin--NADP reductase, root-type isozyme, chloroplast precursor - Nic    | 61.35    | 1 |
| Unknown                                                                               | 22.28    | 1 |
| gb AGN_RNC018xn18f1.ab1 AGN_RNC Nicotiana tabacum cDNA 5', mRNA sequenc               | 18.49    | 1 |
| gb Nicotiana tabacum cDNA-AFLP-fragment BSTT43-4-330, cultivar Bright Yellow 2        | 178.98   | 1 |
| gb KR3B.104B03F.051108T7 KR3B Nicotiana tabacum cDNA clone KR3B.104B03, m             | 247.87   | 1 |
| tc Rep: Chromosome chr11 scaffold_14, whole genome shotgun sequence - Vitis vi        | 583.42   | 1 |
| Unknown                                                                               | 1113.21  | 1 |
| Unknown                                                                               | 92.53    | 1 |
| tc Rep: Uncharacterized protein At1g06515.2 - Arabidopsis thaliana (Mouse-ear cre     | 269.96   | 1 |
| tc Rep: Chromosome chr7 scaffold_20, whole genome shotgun sequence - Vitis vin        | 374.67   | 1 |
| tc Rep: Cytochrome c, monohaem - Medicago truncatula (Barrel medic), partial (54      | 1012.86  | 1 |
| tc Rep: Chromosome chr14 scaffold_26, whole genome shotgun sequence - Vitis vi        | 1129.31  | 1 |

|                                                                                       |         |   |
|---------------------------------------------------------------------------------------|---------|---|
| gb AM840768 seedling library, SL Nicotiana tabacum cDNA clone nt002017057, mF         | 40.04   | 1 |
| gb KL4B.104L10F.051104T7 KL4B Nicotiana tabacum cDNA clone KL4B.104L10, mRI           | 27.93   | 1 |
| tc Rep: Chromosome chr4 scaffold_6, whole genome shotgun sequence - Vitis vinif       | 59.76   | 1 |
| gb AGN_PNL214br1_h11.trimmed.seq AGN_PNL Nicotiana tabacum cDNA 3', mRN.              | 74.77   | 1 |
| gb KR3B.110M18F.051111T7 KR3B Nicotiana tabacum cDNA clone KR3B.110M18, r             | 450.96  | 1 |
| tc Rep: Chromosome chr8 scaffold_23, whole genome shotgun sequence - Vitis vin        | 25.79   | 1 |
| gb AGN_RNC124xk20f1.ab1 AGN_RNC Nicotiana tabacum cDNA 5', mRNA sequenc               | 23.83   | 1 |
| gb AGN_ELP004xg14f1.ab1 AGN_ELP Nicotiana tabacum cDNA 5', mRNA sequence              | 69.09   | 1 |
| Unknown                                                                               | 17.8    | 1 |
| gb TT-05_O02 Samsun trichome library Nicotiana tabacum cDNA, mRNA sequence            | 88.29   | 1 |
| Unknown                                                                               | 1788    | 1 |
| gb KP1B.109P07F.050727T7 KP1B Nicotiana tabacum cDNA clone KP1B.109P07, mI            | 20.63   | 1 |
| gb KN6B.103J11F.060103T7 KN6B Nicotiana tabacum cDNA clone KN6B.103J11, mI            | 24.43   | 1 |
| tc Rep: Chromosome chr4 scaffold_6, whole genome shotgun sequence - Vitis vinif       | 57.74   | 1 |
| tc Rep: Chromosome undetermined scaffold_133, whole genome shotgun sequenc            | 22.47   | 1 |
| gb 24B08 Transformed tobacco Lambda Zap II library Nicotiana tabacum cDNA 5', r       | 48.96   | 1 |
| tc Rep: Chromosome chr8 scaffold_34, whole genome shotgun sequence - Vitis vin        | 144.33  | 1 |
| gb KR3B.105P09F.051109T7 KR3B Nicotiana tabacum cDNA clone KR3B.105P09, mI            | 45.86   | 1 |
| Unknown                                                                               | 24.12   | 1 |
| tc Rep: NADH dehydrogenase subunit II - Dicyema misakiense, partial (9%) [TC6863      | 27.57   | 1 |
| tc Rep: Chromosome chr18 scaffold_1, whole genome shotgun sequence - Vitis vin        | 20.19   | 1 |
| gb KG9B.106A24F.051129T7 KG9B Nicotiana tabacum cDNA clone KG9B.106A24, n             | 59.58   | 1 |
| Unknown                                                                               | 200.81  | 1 |
| tc Rep: 6-4 photolyase - Arabidopsis thaliana (Mouse-ear cress), partial (38%) [TC5   | 56.3    | 1 |
| gb FS424443 normalized full-length tobacco cDNA library Nicotiana tabacum cDNA        | 24.09   | 1 |
| gb TT-10_E15 K326 late senescent leaf library Nicotiana tabacum cDNA, mRNA seq        | 149.49  | 1 |
| gb KR2B.002B04F.051019T7 KR2B Nicotiana tabacum cDNA clone KR2B.002B04, m             | 32.2    | 1 |
| Unknown                                                                               | 18.26   | 1 |
| tc Rep: Chromosome chr5 scaffold_64, whole genome shotgun sequence - Vitis vin        | 240.13  | 1 |
| tc Rep: Chromosome chr4 scaffold_39, whole genome shotgun sequence - Vitis vin        | 4291.13 | 1 |
| gb KP1B.037A10F.050623T7 KP1B Nicotiana tabacum cDNA clone KP1B.037A10, m             | 108.57  | 1 |
| tc Rep: Chromosome chr11 scaffold_14, whole genome shotgun sequence - Vitis vi        | 1139.7  | 1 |
| gb Nicotiana tabacum squalene synthase mRNA, complete cds [U60057]                    | 10499.3 | 1 |
| tc Rep: Ribosomal protein L1 - Oryza sativa subsp. japonica (Rice), partial (72%) [TC | 19.56   | 1 |

|                                                                                       |         |   |
|---------------------------------------------------------------------------------------|---------|---|
| gb AGN_RNC029xf13f1.ab1 AGN_RNC Nicotiana tabacum cDNA 5', mRNA sequence              | 145.84  | 1 |
| tc Rep: Chromosome undetermined scaffold_60, whole genome shotgun sequence            | 189.21  | 1 |
| gb Nicotiana tabacum mRNA for putative cytosolic cysteine synthase 7 (oas7 gene)      | 5439.63 | 1 |
| tc Rep: UDP-apiose/xylose synthase - Solanum tuberosum (Potato), partial (41%) [T     | 17216.9 | 1 |
| Unknown                                                                               | 728.22  | 1 |
| tc Rep: Chromosome chr18 scaffold_1, whole genome shotgun sequence - Vitis vin        | 44.48   | 1 |
| Unknown                                                                               | 55.77   | 1 |
| Unknown                                                                               | 1038.32 | 1 |
| tc Rep: Polyubiquitin - Populus tremula x Populus tremuloides, complete [TC54238      | 25.88   | 1 |
| Unknown                                                                               | 72.16   | 1 |
| tc Rep: Chromosome chr13 scaffold_17, whole genome shotgun sequence - Vitis vi        | 628.18  | 1 |
| Unknown                                                                               | 41.2    | 1 |
| tc Rep: Chromosome chr13 scaffold_48, whole genome shotgun sequence - Vitis vi        | 56.67   | 1 |
| Unknown                                                                               | 18.65   | 1 |
| gb 18.2B08 Transformed tobacco Lambda Zap II library Nicotiana tabacum cDNA 5'        | 60.68   | 1 |
| gb AGN_RNC019xl15f1.ab1 AGN_RNC Nicotiana tabacum cDNA 5', mRNA sequence              | 64.03   | 1 |
| Unknown                                                                               | 23.26   | 1 |
| Unknown                                                                               | 912.18  | 1 |
| gb KG9B.003G22F.050720T7 KG9B Nicotiana tabacum cDNA clone KG9B.003G22, n             | 99.16   | 1 |
| Unknown                                                                               | 911.25  | 1 |
| tc Rep: Chromosome chr15 scaffold_40, whole genome shotgun sequence - Vitis vi        | 373.71  | 1 |
| gb AGN_RPC019xe13f1.ab1 AGN_RPC Nicotiana tabacum cDNA 5', mRNA sequence              | 835.73  | 1 |
| tc Rep: S-adenosylmethionine synthetase - Solanum tuberosum (Potato), partial (9'     | 189.67  | 1 |
| tc Rep: Chromosome undetermined scaffold_91, whole genome shotgun sequence            | 140.05  | 1 |
| tc Rep: Chromosome chr1 scaffold_166, whole genome shotgun sequence - Vitis vi        | 55.24   | 1 |
| gb AGN_RNC012xg17f1.ab1 AGN_RNC Nicotiana tabacum cDNA 5', mRNA sequenc               | 191.93  | 1 |
| Unknown                                                                               | 222.6   | 1 |
| tc Rep: Chromosome chr5 scaffold_64, whole genome shotgun sequence - Vitis vin        | 1736.25 | 1 |
| tc Rep: Actin-depolymerizing factor 2 - Petunia hybrida (Petunia), partial (96%) [TC  | 597.31  | 1 |
| Unknown                                                                               | 75.72   | 1 |
| gb BP534995 MAT005 Nicotiana tabacum cDNA clone BY34204, mRNA sequence [E             | 73.96   | 1 |
| tc Rep: Fatty acid desaturase; Peptidase M, neutral zinc metalloproteinases, zinc-bir | 23234.9 | 1 |
| Unknown                                                                               | 2679.18 | 1 |
| tc Rep: Chromosome chr13 scaffold_48, whole genome shotgun sequence - Vitis vi        | 132.94  | 1 |

|                                                                                      |          |   |
|--------------------------------------------------------------------------------------|----------|---|
| gb KF8B.100M03F.051010T7 KF8 Nicotiana tabacum cDNA clone KF8B.100M03, mF            | 998.42   | 1 |
| gb Nicotiana tabacum hairy root 4 (HR4) mRNA, complete cds [AF043554]                | 48568.55 | 1 |
| gb AGN_RNC121xm10f1.ab1 AGN_RNC Nicotiana tabacum cDNA 5', mRNA sequen               | 21.23    | 1 |
| gb Nicotiana tabacum mRNA for microtubule bundling polypeptide TMBP200, com          | 1151.85  | 1 |
| gb TT-04_B13 Samsun trichome library Nicotiana tabacum cDNA, mRNA sequence           | 24.99    | 1 |
| tc Rep: AT4g05320/C17L7_240 - Arabidopsis thaliana (Mouse-ear cress), complete       | 375.29   | 1 |
| Unknown                                                                              | 780.57   | 1 |
| Unknown                                                                              | 58.24    | 1 |
| gb KR2B.110H02F.051229T7 KR2B Nicotiana tabacum cDNA clone KR2B.110H02, m            | 32.13    | 1 |
| gb KR3B.109D09F.051111T7 KR3B Nicotiana tabacum cDNA clone KR3B.109D09, m            | 38.07    | 1 |
| Unknown                                                                              | 17506.4  | 1 |
| gb EST_CSP005xl20f1.ab1 EST_CSP Nicotiana tabacum cDNA, mRNA sequence [EH6           | 41.49    | 1 |
| Unknown                                                                              | 102.11   | 1 |
| gb KR2B.001E12F.050815T7 KR2B Nicotiana tabacum cDNA clone KR2B.001E12, mI           | 644.71   | 1 |
| gb AGN_RNC007xn07f1.ab1 AGN_RNC Nicotiana tabacum cDNA 5', mRNA sequenc              | 26.79    | 1 |
| gb TT-29_K19 K326 late senescent leaf library Nicotiana tabacum cDNA, mRNA seq       | 82.14    | 1 |
| gb KL4B.108H11F.051105T7 KL4B Nicotiana tabacum cDNA clone KL4B.108H11, mF           | 85.2     | 1 |
| tc Rep: Translationally-controlled tumor protein homolog - Solanum tuberosum (Pc     | 6282.1   | 1 |
| tc Rep: Photosystem II 44 kDa reaction center protein - Nicotiana tabacum (Commc     | 20.61    | 1 |
| tc Rep: Predicted protein - Physcomitrella patens subsp. patens, partial (12%) [TC6' | 23.24    | 1 |
| tc Rep: At1g20110/T20H2_10 - Arabidopsis thaliana (Mouse-ear cress), partial (25%    | 190.42   | 1 |
| tc Rep: Glycoprotease family protein - Synechococcus sp. (strain CC9311), partial (5 | 557.3    | 1 |
| gb AGN_RNC125xk01r1.ab1 AGN_RNC Nicotiana tabacum cDNA 3', mRNA sequenc              | 209.51   | 1 |
| tc Rep: Chromosome chr1 scaffold_136, whole genome shotgun sequence - Vitis vi       | 729.52   | 1 |
| tc Rep: Chromosome chr14 scaffold_26, whole genome shotgun sequence - Vitis vi       | 37.58    | 1 |
| Unknown                                                                              | 17.78    | 1 |
| Unknown                                                                              | 76.46    | 1 |
| gb Nicotiana tabacum diphenol oxidase mRNA, partial cds [U45243]                     | 38.41    | 1 |
| Unknown                                                                              | 1092.14  | 1 |
| gb KP1B.111K06F.060116T7 KP1B Nicotiana tabacum cDNA clone KP1B.111K06, mI           | 132.46   | 1 |
| tc Rep: Chromosome chr6 scaffold_25, whole genome shotgun sequence - Vitis vin       | 21.99    | 1 |
| gb KL4B.111P09F.060128T7 KL4B Nicotiana tabacum cDNA clone KL4B.111P09, mR           | 271.98   | 1 |
| Unknown                                                                              | 133.6    | 1 |
| gb AGN_RPC024xg07f1.ab1 AGN_RPC Nicotiana tabacum cDNA 5', mRNA sequenc              | 31.42    | 1 |



|                                                                                        |          |   |
|----------------------------------------------------------------------------------------|----------|---|
| gb TT-10_I08 Burley21 trichome library Nicotiana tabacum cDNA, mRNA sequence           | 111.8    | 1 |
| tc Rep: Chromosome undetermined scaffold_226, whole genome shotgun sequenc             | 704.96   | 1 |
| gb KF8B.201A17F.060124T7 KF8 Nicotiana tabacum cDNA clone KF8B.201A17, mRN             | 85.67    | 1 |
| Unknown                                                                                | 24.3     | 1 |
| tc Rep: Chromosome chr2 scaffold_105, whole genome shotgun sequence - Vitis vi         | 89.15    | 1 |
| tc Rep: Chromosome chr12 scaffold_18, whole genome shotgun sequence - Vitis vi         | 80.53    | 1 |
| Unknown                                                                                | 183.77   | 1 |
| gb Nicotiana tabacum NTS1 protein mRNA, complete cds [AF248538]                        | 17512.75 | 1 |
| tc Rep: Chromosome chr4 scaffold_6, whole genome shotgun sequence - Vitis vinif        | 59.18    | 1 |
| gb AGN_PNL222cf1_e9.trimmed.seq AGN_PNL Nicotiana tabacum cDNA 5', mRNA                | 174.22   | 1 |
| tc Rep: Chromosome chr14 scaffold_21, whole genome shotgun sequence - Vitis vi         | 1556.71  | 1 |
| gb BP136210 MAT001 Nicotiana tabacum cDNA clone BY8791, mRNA sequence [Bf              | 431.62   | 1 |
| gb BP535041 MAT005 Nicotiana tabacum cDNA clone BY34252, mRNA sequence [E              | 100.25   | 1 |
| Unknown                                                                                | 49.91    | 1 |
| tc Rep: 26S proteasome subunit 7-like protein - Lactuca sativa (Garden lettuce), pa    | 76.97    | 1 |
| Unknown                                                                                | 129.38   | 1 |
| gb KN6B.009N02F.050901T7 KN6B Nicotiana tabacum cDNA clone KN6B.009N02, r              | 21.47    | 1 |
| gb AGN_PNL205bf1_d1.trimmed.seq AGN_PNL Nicotiana tabacum cDNA 5', mRNA                | 89.18    | 1 |
| gb FS390767 normalized full-length tobacco cDNA library Nicotiana tabacum cDNA         | 687.97   | 1 |
| gb KR2B.002K11F.051019T7 KR2B Nicotiana tabacum cDNA clone KR2B.002K11, m              | 79.81    | 1 |
| gb AGN_RNC105xd19f1.ab1 AGN_RNC Nicotiana tabacum cDNA 5', mRNA sequenc                | 17.53    | 1 |
| tc Rep: Chromosome chr7 scaffold_42, whole genome shotgun sequence - Vitis vin         | 423.1    | 1 |
| gb KG9B.003C06F.050720T7 KG9B Nicotiana tabacum cDNA clone KG9B.003C06, m              | 90.13    | 1 |
| tc Rep: Homolog of defender against apoptotic death 1 homolog - Nicotiana suave        | 153.61   | 1 |
| gb Nicotiana tabacum NtWRKY-6 mRNA for WRKY DNA-binding protein, complete c            | 74       | 1 |
| tc Rep: UDP-apiose/xylose synthase - Solanum tuberosum (Potato), partial (96%) [T      | 14053.65 | 1 |
| Unknown                                                                                | 52.28    | 1 |
| tc Rep: Ubiquitin-like protein SMT3 - Oryza sativa subsp. japonica (Rice), partial (86 | 143.23   | 1 |
| tc Rep: Beta-carotene hydroxylase 2 - Capsicum annuum (Bell pepper), partial (75%      | 215.92   | 1 |
| gb TT-49_H17 K326 late senescent leaf library Nicotiana tabacum cDNA, mRNA seq         | 23.63    | 1 |
| Unknown                                                                                | 25.3     | 1 |
| gb KF8B.201E11F.060124T7 KF8 Nicotiana tabacum cDNA clone KF8B.201E11, mRN             | 22752.4  | 1 |
| Unknown                                                                                | 527.14   | 1 |
| gb TT-08_F14 K326 early senescent leaf library Nicotiana tabacum cDNA, mRNA ser        | 50       | 1 |

|                                                                                     |         |   |
|-------------------------------------------------------------------------------------|---------|---|
| tc Rep: Chromosome chr8 scaffold_68, whole genome shotgun sequence - Vitis vin      | 333.04  | 1 |
| Unknown                                                                             | 35.47   | 1 |
| Unknown                                                                             | 103.15  | 1 |
| gb KL5B.118M13F.060217T7 KL5B Nicotiana tabacum cDNA clone KL5B.118M13, r           | 104.71  | 1 |
| gb FS383363 normalized full-length tobacco cDNA library Nicotiana tabacum cDNA      | 39      | 1 |
| gb KG9B.005L07F.050721T7 KG9B Nicotiana tabacum cDNA clone KG9B.005L07, m           | 203.95  | 1 |
| gb KF8C.102G18F.051214T7 KF8 Nicotiana tabacum cDNA clone KF8C.102G18, mRI          | 53349   | 1 |
| gb BL12.103G21F.060309T7 BL12 Nicotiana tabacum cDNA clone BL12.103G21, mF          | 3079.23 | 1 |
| Unknown                                                                             | 1072.91 | 1 |
| gb KF8C.106N11F.051215T7 KF8 Nicotiana tabacum cDNA clone KF8C.106N11, mRI          | 411.39  | 1 |
| gb TT-41_J12 Samsun trichome library Nicotiana tabacum cDNA, mRNA sequence [        | 33.04   | 1 |
| Unknown                                                                             | 24.79   | 1 |
| tc Rep: SINA1 - Medicago truncatula (Barrel medic), partial (86%) [TC40495]         | 988.07  | 1 |
| tc Rep: AT3g47831/T23J7 - Arabidopsis thaliana (Mouse-ear cress), partial (89%) [T  | 197.06  | 1 |
| gb KP1B.102B01F.050722T7 KP1B Nicotiana tabacum cDNA clone KP1B.102B01, ml          | 183.96  | 1 |
| tc Rep: Ribosomal protein L33 - Castanea sativa (Sweet chestnut), complete [TC602   | 186.94  | 1 |
| tc Rep: Ribosomal protein L7/L12 C-terminal domain containing protein - Solanum     | 29.63   | 1 |
| Unknown                                                                             | 91.77   | 1 |
| Unknown                                                                             | 767.78  | 1 |
| gb AGN_RNC022xp24f1.ab1 AGN_RNC Nicotiana tabacum cDNA 5', mRNA sequenc             | 748.04  | 1 |
| tc Rep: Constitutive plastid-lipid associated protein - Solanum lycopersicum (Tomat | 57.53   | 1 |
| tc Rep: UDP-galactose transporter homolog 1, related - Medicago truncatula (Barre   | 2327.12 | 1 |
| Unknown                                                                             | 47.26   | 1 |
| gb AGN_RNC005xn15f1.ab1 AGN_RNC Nicotiana tabacum cDNA 5', mRNA sequenc             | 50.18   | 1 |
| Unknown                                                                             | 41.72   | 1 |
| gb KP1B.104G11F.050725T7 KP1B Nicotiana tabacum cDNA clone KP1B.104G11, m           | 995.65  | 1 |
| gb KL4B.105P04F.051104T7 KL4B Nicotiana tabacum cDNA clone KL4B.105P04, mR          | 70.14   | 1 |
| tc Rep: Chromosome undetermined scaffold_928, whole genome shotgun sequenc          | 42.28   | 1 |
| gb BP131950 MAT001 Nicotiana tabacum cDNA clone BY4065, mRNA sequence [BF           | 33.51   | 1 |
| gb CHO_SL024xm14f1.ab1 CHO_SL Nicotiana tabacum cDNA, mRNA sequence [EH6            | 35.66   | 1 |
| tc Rep: RS2 protein - Beta vulgaris subsp. vulgaris, partial (25%) [TC48506]        | 40.5    | 1 |
| tc Rep: Isoform 2 of Q9XI05 - Arabidopsis thaliana (Mouse-ear cress), complete [TC  | 130.39  | 1 |
| gb KL4B.111G14F.060128T7 KL4B Nicotiana tabacum cDNA clone KL4B.111G14, mF          | 20.02   | 1 |
| gb CHO_SL002xo04f1.ab1 CHO_SL Nicotiana tabacum cDNA, mRNA sequence [EH6            | 64.26   | 1 |

|                                                                                       |         |   |
|---------------------------------------------------------------------------------------|---------|---|
| Unknown                                                                               | 161.92  | 1 |
| Unknown                                                                               | 22.6    | 1 |
| gb KR3B.111K10F.060119T7 KR3B Nicotiana tabacum cDNA clone KR3B.111K10, m             | 92.18   | 1 |
| tc Rep: Eukaryotic translation initiation factor 5A-4 - Solanum lycopersicum (Tomat   | 212.71  | 1 |
| tc Rep: Chromosome undetermined scaffold_51, whole genome shotgun sequence            | 454.81  | 1 |
| gb KL4B.107K19F.051126T7 KL4B Nicotiana tabacum cDNA clone KL4B.107K19, mR            | 27.28   | 1 |
| tc Rep: Fructose-bisphosphate aldolase - Vitis vinifera (Grape), partial (96%) [TC447 | 6280.91 | 1 |
| gb KT7B.103H01F.060124T7 KT7 Nicotiana tabacum cDNA clone KT7B.103H01, mR             | 71.67   | 1 |
| tc Rep: Ribosomal protein L30e - Pisum sativum (Garden pea), complete [TC57011]       | 45.39   | 1 |
| gb AGN_RPC022xm11f1.ab1 AGN_RPC Nicotiana tabacum cDNA 5', mRNA sequenc               | 103.65  | 1 |
| Unknown                                                                               | 420.22  | 1 |
| tc Rep: 3-ketoacyl-CoA reductase 1 - Gossypium hirsutum (Upland cotton) (Gossypi      | 30.15   | 1 |
| gb KT7C.110I10F.051221T7 KT7 Nicotiana tabacum cDNA clone KT7C.110I10, mRN/           | 32.15   | 1 |
| gb BL12.103H16F.060309T7 BL12 Nicotiana tabacum cDNA clone BL12.103H16, mF            | 41.17   | 1 |
| gb Nicotiana tabacum mRNA for cytosolic glucose-6-phosphate dehydrogenase TC          | 94.98   | 1 |
| Unknown                                                                               | 81.31   | 1 |
| gb TT-01_E01 K326 early senescent leaf library Nicotiana tabacum cDNA, mRNA ser       | 78.83   | 1 |
| gb KN6B.102A15F.051230T7 KN6B Nicotiana tabacum cDNA clone KN6B.102A15, n             | 672.78  | 1 |
| gb Nicotiana tabacum mRNA for TBZ17, complete cds [D63951]                            | 1008.01 | 1 |
| Unknown                                                                               | 47.92   | 1 |
| tc Rep: Chromosome chr8 scaffold_106, whole genome shotgun sequence - Vitis vi        | 134.43  | 1 |
| tc Rep: Chromosome chr8 scaffold_29, whole genome shotgun sequence - Vitis vin        | 25.45   | 1 |
| gb KF8C.101L11F.051214T7 KF8 Nicotiana tabacum cDNA clone KF8C.101L11, mRN            | 130.13  | 1 |
| tc Rep: Chromosome chr12 scaffold_47, whole genome shotgun sequence - Vitis vi        | 3697.3  | 1 |
| gb KG9B.004E04F.050721T7 KG9B Nicotiana tabacum cDNA clone KG9B.004E04, m             | 81.94   | 1 |
| gb AGN_RNC023xb17f1.ab1 AGN_RNC Nicotiana tabacum cDNA 5', mRNA sequenc               | 41.99   | 1 |
| Unknown                                                                               | 88.49   | 1 |
| gb KN6B.109P08F.060106T7 KN6B Nicotiana tabacum cDNA clone KN6B.109P08, r             | 504.87  | 1 |
| tc Rep: Chromosome chr9 scaffold_7, whole genome shotgun sequence - Vitis vinif       | 286.65  | 1 |
| gb CHO_SL008xa12f1.ab1 CHO_SL Nicotiana tabacum cDNA, mRNA sequence [EH6              | 4054.92 | 1 |
| gb KT7C.112H03F.051221T7 KT7 Nicotiana tabacum cDNA clone KT7C.112H03, mRl            | 118.21  | 1 |
| gb KT7C.110O14F.051221T7 KT7 Nicotiana tabacum cDNA clone KT7C.110O14, mR             | 1304.79 | 1 |
| gb AM807541 seedling library, SL Nicotiana tabacum cDNA clone nt002034037, mF         | 1473.37 | 1 |
| Unknown                                                                               | 322.84  | 1 |

|                                                                                         |         |   |
|-----------------------------------------------------------------------------------------|---------|---|
| Unknown                                                                                 | 37.73   | 1 |
| Unknown                                                                                 | 63.73   | 1 |
| tc Rep: Chromosome chr18 scaffold_137, whole genome shotgun sequence - Vitis v          | 2441.93 | 1 |
| Unknown                                                                                 | 26.18   | 1 |
| tc Rep: Pathogenesis-related thaumatin family protein - Brassica campestris (Field i    | 374.85  | 1 |
| tc Rep: Chromosome chr19 scaffold_4, whole genome shotgun sequence - Vitis vin          | 549.8   | 1 |
| gb Nicotiana tabacum mRNA for cysteine proteinase precursor [Z99173]                    | 21.35   | 1 |
| Unknown                                                                                 | 504.49  | 1 |
| gb KT7B.103J24F.060124T7 KT7 Nicotiana tabacum cDNA clone KT7B.103J24, mRN              | 65.05   | 1 |
| gb N.tabacum mRNA for glycine rich protein [X83731]                                     | 518.17  | 1 |
| Unknown                                                                                 | 80.63   | 1 |
| gb Nicotiana tabacum mRNA for cullin 1B (cul1B gene) [AJ344534]                         | 121.78  | 1 |
| tc Rep: Chromosome chr5 scaffold_98, whole genome shotgun sequence - Vitis vin          | 72.46   | 1 |
| tc Rep: Chromosome chr12 scaffold_238, whole genome shotgun sequence - Vitis v          | 49.31   | 1 |
| Unknown                                                                                 | 89.38   | 1 |
| Unknown                                                                                 | 568.73  | 1 |
| gb KF8C.101J06F.051214T7 KF8 Nicotiana tabacum cDNA clone KF8C.101J06, mRN              | 223.68  | 1 |
| gb KT7C.105O15F.051219T7 KT7 Nicotiana tabacum cDNA clone KT7C.105O15, mR               | 77.61   | 1 |
| gb KP1B.108O07F.050726T7 KP1B Nicotiana tabacum cDNA clone KP1B.108O07, m               | 81.51   | 1 |
| tc Rep: Formate--tetrahydrofolate ligase - Spinacia oleracea (Spinach), partial (41%    | 144.09  | 1 |
| Unknown                                                                                 | 966.73  | 1 |
| tc Rep: Insulin degrading enzyme - Solanum lycopersicum (Tomato) (Lycopersicon ε        | 125.46  | 1 |
| tc Rep: Zinc finger A20 and AN1 domain-containing stress-associated protein 8 - Or      | 203.81  | 1 |
| gb BL12.103G13F.060309T7 BL12 Nicotiana tabacum cDNA clone BL12.103G13, mF              | 1187.59 | 1 |
| tc Rep: Vicilin-like storage protein - Picea glauca (White spruce), partial (22%) [TC4: | 163.02  | 1 |
| tc Rep: Chromosome chr15 scaffold_82, whole genome shotgun sequence - Vitis vi          | 20547.6 | 1 |
| tc Rep: S-adenosylmethionine decarboxylase proenzyme (AdoMetDC) (SamDC) [Cc             | 5443.64 | 1 |
| gb Nicotiana tabacum internal-motor kinesin mRNA, partial cds [DQ156499]                | 40.46   | 1 |
| tc Rep: Cyc07 - Nicotiana tabacum (Common tobacco), partial (72%) [TC72415]             | 116.89  | 1 |
| tc Rep: Chromosome chr12 scaffold_38, whole genome shotgun sequence - Vitis vi          | 29.09   | 1 |
| tc Rep: Chromosome chr12 scaffold_18, whole genome shotgun sequence - Vitis vi          | 494.18  | 1 |
| Unknown                                                                                 | 50.99   | 1 |
| gb AGN_RNC014xe20f1.ab1 AGN_RNC Nicotiana tabacum cDNA 5', mRNA sequenc                 | 2559.76 | 1 |
| tc Rep: Chromosome chr7 scaffold_44, whole genome shotgun sequence - Vitis vin          | 520.12  | 1 |

|                                                                                      |          |   |
|--------------------------------------------------------------------------------------|----------|---|
| gb TOBESTR034C08 TOBEST cDNA library 1 Nicotiana tabacum cDNA 5', mRNA sequ          | 4674.07  | 1 |
| gb KP1B.110G24F.050727T7 KP1B Nicotiana tabacum cDNA clone KP1B.110G24, m            | 90.28    | 1 |
| tc Rep: 60S ribosomal protein L13 - Solanum tuberosum (Potato), complete [TC416      | 18.4     | 1 |
| Unknown                                                                              | 31544.75 | 1 |
| tc Rep: Glutamate synthase (Ferredoxin) (Clone C(35)) - Nicotiana tabacum (Comm      | 58.42    | 1 |
| gb KF8C.101H07F.051214T7 KF8 Nicotiana tabacum cDNA clone KF8C.101H07, mRI           | 491.2    | 1 |
| Unknown                                                                              | 256.19   | 1 |
| Unknown                                                                              | 29.55    | 1 |
| gb KG9B.103O14F.051128T7 KG9B Nicotiana tabacum cDNA clone KG9B.103O14, r            | 48.51    | 1 |
| Unknown                                                                              | 48.26    | 1 |
| gb KG9B.005I19F.050721T7 KG9B Nicotiana tabacum cDNA clone KG9B.005I19, mF           | 30.22    | 1 |
| gb CHO_SL026xg23f1.ab1 CHO_SL Nicotiana tabacum cDNA, mRNA sequence [EH6             | 1463.89  | 1 |
| Unknown                                                                              | 185.33   | 1 |
| gb KT7B.107P18F.060124T7 KT7 Nicotiana tabacum cDNA clone KT7B.107P18, mRI           | 29.01    | 1 |
| tc Rep: Os01g0332900 protein - Oryza sativa subsp. japonica (Rice), partial (45%) [T | 24.49    | 1 |
| Unknown                                                                              | 20       | 1 |
| Unknown                                                                              | 86.91    | 1 |
| tc Rep: Chromosome chr1 scaffold_166, whole genome shotgun sequence - Vitis vi       | 43.05    | 1 |
| tc Rep: Chromosome chr7 scaffold_42, whole genome shotgun sequence - Vitis vin       | 58.19    | 1 |
| Unknown                                                                              | 63.38    | 1 |
| Unknown                                                                              | 145.34   | 1 |
| gb AGN_RNC024xj04f1.ab1 AGN_RNC Nicotiana tabacum cDNA 5', mRNA sequenc              | 30.59    | 1 |
| gb KF8C.104N06F.051214T7 KF8 Nicotiana tabacum cDNA clone KF8C.104N06, mRI           | 3330.51  | 1 |
| gb AGN_RPC019xd19f1.ab1 AGN_RPC Nicotiana tabacum cDNA 5', mRNA sequenc              | 23.65    | 1 |
| tc Rep: Chromosome chr18 scaffold_1, whole genome shotgun sequence - Vitis vin       | 557.46   | 1 |
| gb KF8C.104K08F.051214T7 KF8 Nicotiana tabacum cDNA clone KF8C.104K08, mRN           | 101.03   | 1 |
| Unknown                                                                              | 189.06   | 1 |
| Unknown                                                                              | 1624.33  | 1 |
| gb AGN_RNC010xp20f1.ab1 AGN_RNC Nicotiana tabacum cDNA 5', mRNA sequenc              | 527.45   | 1 |
| tc Rep: Chromosome chr18 scaffold_121, whole genome shotgun sequence - Vitis v       | 26.08    | 1 |
| gb KL4B.102D03F.051125T7 KL4B Nicotiana tabacum cDNA clone KL4B.102D03, mF           | 1588.11  | 1 |
| gb AGN_RPC015xe06f1.ab1 AGN_RPC Nicotiana tabacum cDNA 5', mRNA sequenc              | 442.48   | 1 |
| gb N.tabacum mRNA for phosphoglyceromutase [X70651]                                  | 1141.13  | 1 |
| gb KP1B.001L22F.050628T7 KP1B Nicotiana tabacum cDNA clone KP1B.001L22, mR           | 762.48   | 1 |

|                                                                                       |         |   |
|---------------------------------------------------------------------------------------|---------|---|
| gb AGN_RNC026xp07f1.ab1 AGN_RNC Nicotiana tabacum cDNA 5', mRNA sequenc               | 26.7    | 1 |
| gb BP531034 MAT005 Nicotiana tabacum cDNA clone BY23306, mRNA sequence [E             | 26.76   | 1 |
| Unknown                                                                               | 371.85  | 1 |
| tc Rep: Serine/threonine protein phosphatase - Vitis vinifera (Grape), partial (9%) [ | 420.11  | 1 |
| gb BP530134 MAT005 Nicotiana tabacum cDNA clone BY21119, mRNA sequence [E             | 170.63  | 1 |
| Unknown                                                                               | 32.46   | 1 |
| tc Rep: Predicted protein - Physcomitrella patens subsp. patens, partial (96%) [TC4   | 79.5    | 1 |
| tc Rep: Calcium binding protein - Sesbania rostrata, partial (41%) [TC45153]          | 305.87  | 1 |
| gb KL5B.117D22F.060217T7 KL5B Nicotiana tabacum cDNA clone KL5B.117D22, mF            | 107.23  | 1 |
| tc Rep: Alpha-amylase - Plantago major (Common plantain), partial (53%) [TC4459C      | 103.3   | 1 |
| gb KP1B.104A02F.050725T7 KP1B Nicotiana tabacum cDNA clone KP1B.104A02, m             | 123.36  | 1 |
| Unknown                                                                               | 17.64   | 1 |
| gb Nicotiana tabacum partial mRNA for glutamyl tRNA Reductase (hemA gene) [AN         | 105.09  | 1 |
| gb Nicotiana tabacum NtGPDL mRNA for putative glycerophosphoryl diester phosph        | 686.07  | 1 |
| gb KF8C.105B14F.051215T7 KF8 Nicotiana tabacum cDNA clone KF8C.105B14, mRN            | 224.41  | 1 |
| gb KT7C.113G06F.051221T7 KT7 Nicotiana tabacum cDNA clone KT7C.113G06, mR             | 3545.7  | 1 |
| Unknown                                                                               | 68.39   | 1 |
| tc Rep: cyclin K - Gallus gallus, partial (3%) [TC50933]                              | 40.79   | 1 |
| tc Rep: Chromosome chr14 scaffold_27, whole genome shotgun sequence - Vitis vi        | 45.35   | 1 |
| tc Rep: Small GTP-binding protein - Solanum lycopersicum (Tomato) (Lycopersicon       | 64.8    | 1 |
| Unknown                                                                               | 28.94   | 1 |
| tc Rep: Chromosome chr7 scaffold_42, whole genome shotgun sequence - Vitis vin        | 28.12   | 1 |
| gb KT7C.112B04F.051221T7 KT7 Nicotiana tabacum cDNA clone KT7C.112B04, mRI            | 30.22   | 1 |
| tc Rep: Chromosome chr8 scaffold_106, whole genome shotgun sequence - Vitis vi        | 100.24  | 1 |
| tc Rep: Brain protein 44-like - Zea mays (Maize), partial (89%) [TC53445]             | 511.52  | 1 |
| gb KL4B.112P14F.060131T7 KL4B Nicotiana tabacum cDNA clone KL4B.112P14, mR            | 1078.47 | 1 |
| gb TOBESTR006A09 TOBEST cDNA library 1 Nicotiana tabacum cDNA 5', mRNA seq            | 185.18  | 1 |
| gb KR3B.110C05F.051111T7 KR3B Nicotiana tabacum cDNA clone KR3B.110C05, m             | 30.68   | 1 |
| Unknown                                                                               | 220.61  | 1 |
| Unknown                                                                               | 478.2   | 1 |
| tc Rep: AT4g32020/F10N7_170 - Arabidopsis thaliana (Mouse-ear cress), partial (1      | 351.69  | 1 |
| Unknown                                                                               | 66.79   | 1 |
| gb Nicotiana tabacum callus-expressing factor (CEF1) mRNA, complete cds [AY286C       | 51.41   | 1 |
| Unknown                                                                               | 21.01   | 1 |

|                                                                                     |          |   |
|-------------------------------------------------------------------------------------|----------|---|
| tc Rep: Chromosome chr11 scaffold_56, whole genome shotgun sequence - Vitis vi      | 152.26   | 1 |
| gb AGN_RNC025xi12f1.ab1 AGN_RNC Nicotiana tabacum cDNA 5', mRNA sequence            | 32.23    | 1 |
| gb KL4B.105E10F.051104T7 KL4B Nicotiana tabacum cDNA clone KL4B.105E10, mR          | 84.43    | 1 |
| gb BP529465 MAT001 Nicotiana tabacum cDNA clone BY14363, mRNA sequence [E           | 81.49    | 1 |
| tc Rep: GAGA-motif binding transcriptional activator - Populus trichocarpa (Wester  | 18.79    | 1 |
| gb KT7C.112M21F.051221T7 KT7 Nicotiana tabacum cDNA clone KT7C.112M21, ml           | 60.93    | 1 |
| tc Rep: LIM-domain SF3 protein - Nicotiana tabacum (Common tobacco), complete       | 234.49   | 1 |
| gb KG9B.005L24F.050721T7 KG9B Nicotiana tabacum cDNA clone KG9B.005L24, m           | 140.21   | 1 |
| Unknown                                                                             | 27.87    | 1 |
| gb KG9B.103M11F.051128T7 KG9B Nicotiana tabacum cDNA clone KG9B.103M11,             | 107.84   | 1 |
| tc Rep: Membrane-anchored ubiquitin-fold protein 2 - Arabidopsis thaliana (Mouse    | 42.11    | 1 |
| gb KG9B.002G17F.050720T7 KG9B Nicotiana tabacum cDNA clone KG9B.002G17, n           | 23.23    | 1 |
| Unknown                                                                             | 2646.04  | 1 |
| tc Rep: Glutathione-regulated potassium-efflux system protein - Azoarcus sp. (strai | 28.6     | 1 |
| gb AM812698 COL, cold overnight library Nicotiana tabacum cDNA clone nt006139       | 23.76    | 1 |
| gb KN6B.100E22F.051019T7 KN6B Nicotiana tabacum cDNA clone KN6B.100E22, m           | 21.07    | 1 |
| tc Rep: FtsH-like protein - Solanum lycopersicum (Tomato) (Lycopersicon esculentu   | 21.31    | 1 |
| tc Rep: Chloroplast methionine sulfoxide reductase B1 precursor - Nicotiana tabacu  | 54.86    | 1 |
| gb TT-27_F19 Burley21 trichome library Nicotiana tabacum cDNA, mRNA sequence        | 139.75   | 1 |
| tc Rep: Chromosome chr9 scaffold_7, whole genome shotgun sequence - Vitis vinif     | 189.37   | 1 |
| gb KL5B.103N16F.060207T7 KL5B Nicotiana tabacum cDNA clone KL5B.103N16, mf          | 97.42    | 1 |
| tc Rep: Chromosome undetermined scaffold_129, whole genome shotgun sequenc          | 2675.92  | 1 |
| Unknown                                                                             | 35.43    | 1 |
| gb KT7C.102B06F.051216T7 KT7 Nicotiana tabacum cDNA clone KT7C.102B06, mRf          | 500.61   | 1 |
| Unknown                                                                             | 690.03   | 1 |
| gb FS417555 normalized full-length tobacco cDNA library Nicotiana tabacum cDNA      | 511.04   | 1 |
| Unknown                                                                             | 17.32    | 1 |
| tc Rep: Chromosome chr1 scaffold_75, whole genome shotgun sequence - Vitis vin      | 13433.65 | 1 |
| tc Rep: Alpha tubulin - Plantago major (Common plantain), partial (86%) [TC42970]   | 102.78   | 1 |
| tc Rep: Chromosome chr14 scaffold_26, whole genome shotgun sequence - Vitis vi      | 358      | 1 |
| gb KF8C.103M11F.051214T7 KF8 Nicotiana tabacum cDNA clone KF8C.103M11, mf           | 16987.05 | 1 |
| gb AGN_ELP011xg12f1.ab1 AGN_ELP Nicotiana tabacum cDNA 5', mRNA sequence            | 18.43    | 1 |
| gb KN6B.108G03F.060106T7 KN6B Nicotiana tabacum cDNA clone KN6B.108G03, n           | 1569.56  | 1 |
| gb KR3B.110P19F.051111T7 KR3B Nicotiana tabacum cDNA clone KR3B.110P19, ml          | 26       | 1 |

|                                                                                     |          |   |
|-------------------------------------------------------------------------------------|----------|---|
| gb BP132833 MAT001 Nicotiana tabacum cDNA clone BY5038, mRNA sequence [BF           | 106.45   | 1 |
| gb TT-38_N21 Samsun trichome library Nicotiana tabacum cDNA, mRNA sequence          | 44.75    | 1 |
| Unknown                                                                             | 10314.25 | 1 |
| gb KL4B.101L06F.051103T7 KL4B Nicotiana tabacum cDNA clone KL4B.101L06, mRI         | 2695.45  | 1 |
| tc Rep: Chromosome chr13 scaffold_74, whole genome shotgun sequence - Vitis vi      | 83.91    | 1 |
| tc Rep: Chromosome chr8 scaffold_29, whole genome shotgun sequence - Vitis vin      | 100.86   | 1 |
| gb KR3B.111P23F.060119T7 KR3B Nicotiana tabacum cDNA clone KR3B.111P23, mI          | 134.07   | 1 |
| tc Rep: CTR1-like protein kinase - Solanum lycopersicum (Tomato) (Lycopersicon es   | 52.44    | 1 |
| gb Nicotiana tabacum WERBP-1 mRNA, complete cds [AB017693]                          | 819.62   | 1 |
| gb KL4B.111L18F.060128T7 KL4B Nicotiana tabacum cDNA clone KL4B.111L18, mRI         | 131.26   | 1 |
| tc Rep: S-adenosylmethionine synthetase - Nicotiana suaveolens, complete [TC435     | 15261.4  | 1 |
| gb CHO_SL004xg01f1.ab1 CHO_SL Nicotiana tabacum cDNA, mRNA sequence [EH6            | 225.02   | 1 |
| gb KL4B.106F03F.051125T7 KL4B Nicotiana tabacum cDNA clone KL4B.106F03, mR          | 20.38    | 1 |
| gb KP1B.001P21F.050628T7 KP1B Nicotiana tabacum cDNA clone KP1B.001P21, mI          | 1172.01  | 1 |
| tc Rep: Photosystem I assembly protein ycf3 - Nicotiana glauca (Wood tobacco),      | 1179.6   | 1 |
| gb KF8C.103A10F.051214T7 KF8 Nicotiana tabacum cDNA clone KF8C.103A10, mRI          | 264.99   | 1 |
| gb KN6B.106G04F.060104T7 KN6B Nicotiana tabacum cDNA clone KN6B.106G04, n           | 103.69   | 1 |
| gb KF8C.105J07F.051215T7 KF8 Nicotiana tabacum cDNA clone KF8C.105J07, mRN,         | 494.1    | 1 |
| Unknown                                                                             | 2048.97  | 1 |
| gb KL5B.111F20F.060117T7 KL5B Nicotiana tabacum cDNA clone KL5B.111F20, mR          | 65.37    | 1 |
| gb AGN_RNC116xg09f1.ab1 AGN_RNC Nicotiana tabacum cDNA 5', mRNA sequenc             | 301.78   | 1 |
| tc Rep: ARG1 protein - Arabidopsis thaliana (Mouse-ear cress), partial (31%) [TC54f | 920.81   | 1 |
| Unknown                                                                             | 47.79    | 1 |
| gb FS432984 normalized full-length tobacco cDNA library Nicotiana tabacum cDNA      | 191.35   | 1 |
| gb TT-04_O15 K326 early senescent leaf library Nicotiana tabacum cDNA, mRNA se      | 89.86    | 1 |
| gb BP128961 MAT001 Nicotiana tabacum cDNA clone BY777, mRNA sequence [BP:           | 20.21    | 1 |
| gb TT-02_O18 K326 late senescent leaf library Nicotiana tabacum cDNA, mRNA seq      | 139.19   | 1 |
| gb FS391062 normalized full-length tobacco cDNA library Nicotiana tabacum cDNA      | 53.28    | 1 |
| gb Nicotiana tabacum adc mRNA for arginine decarboxylase, complete cds [AB110f      | 3347     | 1 |
| tc Rep: Chromosome undetermined scaffold_79, whole genome shotgun sequence          | 278.23   | 1 |
| gb KL4B.111E15F.060128T7 KL4B Nicotiana tabacum cDNA clone KL4B.111E15, mR          | 32.98    | 1 |
| tc Rep: Vacuolar membrane ATPase subunit c'' - Citrus limon (Lemon), partial (97%   | 135.29   | 1 |
| gb AM799542 seedling library, SL Nicotiana tabacum cDNA clone nt002063056, mF       | 149      | 1 |
| gb KR2B.110B10F.051229T7 KR2B Nicotiana tabacum cDNA clone KR2B.110B10, m           | 144.91   | 1 |



|                                                                                    |          |   |
|------------------------------------------------------------------------------------|----------|---|
| Unknown                                                                            | 47.03    | 1 |
| gb KR2B.108P18F.051229T7 KR2B Nicotiana tabacum cDNA clone KR2B.108P18, m          | 101.25   | 1 |
| gb KR3B.106M07F.051109T7 KR3B Nicotiana tabacum cDNA clone KR3B.106M07, r          | 179.07   | 1 |
| Unknown                                                                            | 7150.41  | 1 |
| tc Rep: Ribosomal protein L30e - Pisum sativum (Garden pea), complete [TC54597]    | 165.76   | 1 |
| tc Rep: Ferredoxin III - Musa acuminata (Banana), partial (90%) [TC51824]          | 34.04    | 1 |
| Unknown                                                                            | 989.08   | 1 |
| Unknown                                                                            | 73.66    | 1 |
| gb KF8C.104I01F.051214T7 KF8 Nicotiana tabacum cDNA clone KF8C.104I01, mRNA        | 147.03   | 1 |
| tc Rep: Chromosome undetermined scaffold_129, whole genome shotgun sequenc         | 3169.82  | 1 |
| gb AGN_RPC024xh14f1.ab1 AGN_RPC Nicotiana tabacum cDNA 5', mRNA sequenc            | 86.43    | 1 |
| Unknown                                                                            | 34.68    | 1 |
| gb KL4B.102L05F.051125T7 KL4B Nicotiana tabacum cDNA clone KL4B.102L05, mR         | 116      | 1 |
| tc Rep: Cysteine-rich protein - Nicotiana tabacum (Common tobacco), complete [T    | 47428.45 | 1 |
| Unknown                                                                            | 72.84    | 1 |
| Unknown                                                                            | 125.92   | 1 |
| tc Rep: Isocitrate lyase - Solanum lycopersicum (Tomato) (Lycopersicon esculentur  | 32.16    | 1 |
| Unknown                                                                            | 255.67   | 1 |
| tc Rep: Chromosome chr6 scaffold_3, whole genome shotgun sequence - Vitis vinif    | 132.04   | 1 |
| gb KP1B.102L12F.050722T7 KP1B Nicotiana tabacum cDNA clone KP1B.102L12, mR         | 8969.11  | 1 |
| tc Rep: Nascent polypeptide-associated complex subunit alpha-like protein 2 - Arak | 65.49    | 1 |
| Unknown                                                                            | 37.23    | 1 |
| Unknown                                                                            | 310.24   | 1 |
| Unknown                                                                            | 159.41   | 1 |
| gb TL13.109O07F.060320T7 TL13 Nicotiana tabacum cDNA clone TL13.109O07, mR         | 35.85    | 1 |
| Unknown                                                                            | 30.16    | 1 |
| gb AGN_RNC030xf11f1.ab1 AGN_RNC Nicotiana tabacum cDNA 5', mRNA sequenc            | 20.07    | 1 |
| tc Rep: Chromosome chr4 scaffold_208, whole genome shotgun sequence - Vitis vi     | 51.09    | 1 |
| tc Rep: Chromosome chr4 scaffold_6, whole genome shotgun sequence - Vitis vinif    | 178.2    | 1 |
| Unknown                                                                            | 117.05   | 1 |
| tc Rep: ATP-dependent Clp protease ATP-binding subunit clpA homolog CD4B, chlo     | 480.76   | 1 |
| Unknown                                                                            | 28.7     | 1 |
| gb AGN_ELP026xi20f1.ab1 AGN_ELP Nicotiana tabacum cDNA 5', mRNA sequence           | 92.61    | 1 |
| tc Rep: Chromosome chr8 scaffold_34, whole genome shotgun sequence - Vitis vin     | 25.52    | 1 |

|                                                                                      |         |   |
|--------------------------------------------------------------------------------------|---------|---|
| tc Rep: PHD5 - Glycine max (Soybean), partial (96%) [TC57518]                        | 169.98  | 1 |
| tc Rep: Chromosome undetermined scaffold_296, whole genome shotgun sequenc           | 23.87   | 1 |
| tc Rep: Chromosome chr10 scaffold_312, whole genome shotgun sequence - Vitis \       | 9306.46 | 1 |
| tc Rep: Chromosome undetermined scaffold_91, whole genome shotgun sequence           | 40.17   | 1 |
| Unknown                                                                              | 100.26  | 1 |
| gb Nicotiana tabacum NtH1 mRNA for histone H1, complete cds [AB029614]               | 89.04   | 1 |
| Unknown                                                                              | 4320.92 | 1 |
| gb Nicotiana tabacum mRNA for protoporphyrin IX oxidase, ppxl gene [Y13465]          | 220.83  | 1 |
| gb KP1B.102C18F.050722T7 KP1B Nicotiana tabacum cDNA clone KP1B.102C18, ml           | 1009.71 | 1 |
| tc Rep: Os01g0279200 protein - Oryza sativa subsp. japonica (Rice), partial (95%) [T | 30.71   | 1 |
| tc Rep: Chromosome chr2 scaffold_112, whole genome shotgun sequence - Vitis vi       | 4017.32 | 1 |
| tc Rep: Chromosome chr7 scaffold_20, whole genome shotgun sequence - Vitis vin       | 72.12   | 1 |
| gb KL4B.108P15F.051105T7 KL4B Nicotiana tabacum cDNA clone KL4B.108P15, mR           | 19.85   | 1 |
| Unknown                                                                              | 427.6   | 1 |
| gb AM789132 DL, diurnal library Nicotiana tabacum cDNA clone nt005072014, mRI        | 121.52  | 1 |
| tc Rep: Chromosome chr13 scaffold_45, whole genome shotgun sequence - Vitis vi       | 186.52  | 1 |
| tc Rep: RNA helicase - Arabidopsis thaliana (Mouse-ear cress), partial (6%) [TC6825  | 57.91   | 1 |
| tc Rep: Chromosome chr16 scaffold_94, whole genome shotgun sequence - Vitis vi       | 1033.7  | 1 |
| tc Rep: BZIP transcriptional activator RSG - Nicotiana tabacum (Common tobacco),     | 26.03   | 1 |
| tc Rep: Chromosome chr6 scaffold_15, whole genome shotgun sequence - Vitis vin       | 632.78  | 1 |
| tc Rep: Chromosome undetermined scaffold_123, whole genome shotgun sequenc           | 60.16   | 1 |
| tc Rep: Glutathione peroxidase - Vitis vinifera (Grape), partial (82%) [TC55722]     | 28.25   | 1 |
| tc Rep: Chromosome chr13 scaffold_210, whole genome shotgun sequence - Vitis \       | 40.16   | 1 |
| Unknown                                                                              | 29.51   | 1 |
| Unknown                                                                              | 50.8    | 1 |
| Unknown                                                                              | 192.49  | 1 |
| gb CHO_SL027xg05f1.ab1 CHO_SL Nicotiana tabacum cDNA, mRNA sequence [EH6             | 512.72  | 1 |
| Unknown                                                                              | 29.19   | 1 |
| tc Rep: Chromosome chr1 scaffold_5, whole genome shotgun sequence - Vitis vinif      | 143.2   | 1 |
| gb KT7C.101L06F.051216T7 KT7 Nicotiana tabacum cDNA clone KT7C.101L06, mRN           | 593.72  | 1 |
| tc Rep: Transformer-SR ribonucleoprotein - Nicotiana tabacum (Common tobacco),       | 25.29   | 1 |
| Unknown                                                                              | 31.32   | 1 |
| tc Rep: 40S ribosomal protein S4 - Solanum tuberosum (Potato), complete [TC4036      | 373.88  | 1 |
| tc Rep: Heme-binding-like protein At3g10130, chloroplast precursor - Arabidopsis t   | 79.83   | 1 |

|                                                                                      |         |   |
|--------------------------------------------------------------------------------------|---------|---|
| gb AGN_RPC015xk16f1.ab1 AGN_RPC Nicotiana tabacum cDNA 5', mRNA sequence             | 844.73  | 1 |
| gb KR2B.108C01F.051229T7 KR2B Nicotiana tabacum cDNA clone KR2B.108C01, m            | 285.61  | 1 |
| gb CHO_SL002xo10f1.ab1 CHO_SL Nicotiana tabacum cDNA, mRNA sequence [EH6             | 2654.9  | 1 |
| tc Rep: Os01g0706500 protein - Oryza sativa subsp. japonica (Rice), complete [TC7:   | 384.26  | 1 |
| Unknown                                                                              | 106.2   | 1 |
| tc Rep: CONSTANS interacting protein 2b - Solanum lycopersicum (Tomato) (Lycop       | 66.14   | 1 |
| gb TT-05_A21 K326 trichome library Nicotiana tabacum cDNA, mRNA sequence [FC         | 190.53  | 1 |
| gb TT-47_L06 Burley21 trichome library Nicotiana tabacum cDNA, mRNA sequence         | 57.09   | 1 |
| gb BP530879 MAT005 Nicotiana tabacum cDNA clone BY23143, mRNA sequence [E            | 45.98   | 1 |
| Unknown                                                                              | 23.04   | 1 |
| gb Nicotiana tabacum NtADH mRNA for allyl alcohol dehydrogenase, complete cds        | 1073.46 | 1 |
| Unknown                                                                              | 58.52   | 1 |
| gb KF8C.101C03F.051214T7 KF8 Nicotiana tabacum cDNA clone KF8C.101C03, mRN           | 5406.92 | 1 |
| gb TOBESTRO23F04 TOBEST cDNA library 1 Nicotiana tabacum cDNA 5', mRNA seq           | 1201.05 | 1 |
| gb TOBESTRO46E09 TOBEST cDNA library 1 Nicotiana tabacum cDNA 5', mRNA seq           | 71.83   | 1 |
| gb BP134550 MAT001 Nicotiana tabacum cDNA clone BY6958, mRNA sequence [BF            | 49.74   | 1 |
| tc Rep: Ran binding protein - Nicotiana benthamiana, complete [TC44128]              | 26.92   | 1 |
| Unknown                                                                              | 236.52  | 1 |
| gb KF8C.101G03F.051214T7 KF8 Nicotiana tabacum cDNA clone KF8C.101G03, mRN           | 1123.5  | 1 |
| tc Rep: OJ000223_09.9 protein - Oryza sativa subsp. japonica (Rice), partial (93%) [ | 37.43   | 1 |
| tc Rep: protein kinase family protein - Arabidopsis thaliana, partial (48%) [TC51224 | 25.13   | 1 |
| gb KT7C.101P04F.051216T7 KT7 Nicotiana tabacum cDNA clone KT7C.101P04, mRN           | 2396.45 | 1 |
| tc Rep: Acyltransferase family protein - Cytophaga hutchinsonii (strain ATCC 33406   | 1001.71 | 1 |
| tc Rep: Chromosome chr13 scaffold_17, whole genome shotgun sequence - Vitis vi       | 111.71  | 1 |
| gb KT7C.101L17F.051216T7 KT7 Nicotiana tabacum cDNA clone KT7C.101L17, mRN           | 170.3   | 1 |
| tc Rep: Chromosome chr7 scaffold_31, whole genome shotgun sequence - Vitis vin       | 97.68   | 1 |
| gb TT-03_E01 K326 trichome library Nicotiana tabacum cDNA, mRNA sequence [FG         | 28.7    | 1 |
| tc Rep: Chromosome chr8 scaffold_115, whole genome shotgun sequence - Vitis vi       | 43.32   | 1 |
| Unknown                                                                              | 19.55   | 1 |
| gb AM803627 seedling library, SL Nicotiana tabacum cDNA clone nt002334084, mF        | 1159.87 | 1 |
| Unknown                                                                              | 2681.85 | 1 |
| gb BP530854 MAT005 Nicotiana tabacum cDNA clone BY23117, mRNA sequence [E            | 28.63   | 1 |
| gb N.tabacum mRNA for zinc finger protein, BBF2aO [X97945]                           | 32.21   | 1 |
| gb TT-15_K03 Samsun trichome library Nicotiana tabacum cDNA, mRNA sequence           | 18.91   | 1 |

|                                                                                      |         |   |
|--------------------------------------------------------------------------------------|---------|---|
| gb N.tabacum mRNA for phosphoenolpyruvate carboxylase [X59016]                       | 2720.79 | 1 |
| tc Rep: Chromosome chr18 scaffold_1, whole genome shotgun sequence - Vitis vin       | 779.1   | 1 |
| Unknown                                                                              | 46.2    | 1 |
| tc Rep: Chromosome undetermined scaffold_108, whole genome shotgun sequenc           | 57.09   | 1 |
| gb AGN_RNC126xg10f1.ab1 AGN_RNC Nicotiana tabacum cDNA 5', mRNA sequenc              | 152.18  | 1 |
| Unknown                                                                              | 95.25   | 1 |
| gb CHO_SL005xe14f1.ab1 CHO_SL Nicotiana tabacum cDNA, mRNA sequence [EH6             | 40.56   | 1 |
| tc Rep: Protein TOC75, chloroplast precursor - Pisum sativum (Garden pea), partial   | 79.66   | 1 |
| gb KF8C.101M04F.051214T7 KF8 Nicotiana tabacum cDNA clone KF8C.101M04, mF            | 42.83   | 1 |
| gb CHO_SL020xm13f1.ab1 CHO_SL Nicotiana tabacum cDNA, mRNA sequence [EH6             | 44.57   | 1 |
| tc Rep: Chromosome chr2 scaffold_105, whole genome shotgun sequence - Vitis vi       | 234.27  | 1 |
| tc Rep: Cytoplasmic ribosomal protein S13-like - Solanum tuberosum (Potato), com     | 237.13  | 1 |
| gb TT-09_A07 K326 early senescent leaf library Nicotiana tabacum cDNA, mRNA se       | 130.95  | 1 |
| tc Rep: Chromosome chr1 scaffold_5, whole genome shotgun sequence - Vitis vinif      | 71.55   | 1 |
| tc Rep: Cytochrome c oxidase family protein-like - Solanum tuberosum (Potato), co    | 515.07  | 1 |
| gb KN6B.105L09F.060104T7 KN6B Nicotiana tabacum cDNA clone KN6B.105L09, m            | 17.55   | 1 |
| tc Rep: Chromosome chr17 scaffold_12, whole genome shotgun sequence - Vitis vi       | 498.6   | 1 |
| tc Rep: Phototropin-1 - Solanum lycopersicum (Tomato) (Lycopersicon esculentum)      | 217.03  | 1 |
| Unknown                                                                              | 43.51   | 1 |
| Unknown                                                                              | 228.46  | 1 |
| tc Rep: Chromosome chr2 scaffold_132, whole genome shotgun sequence - Vitis vi       | 233.47  | 1 |
| tc Rep: Phage integrase - Frankia sp. (strain Ccl3), partial (9%) [TC73383]          | 93.13   | 1 |
| gb KT7C.106O18F.051219T7 KT7 Nicotiana tabacum cDNA clone KT7C.106O18, mR            | 1063.27 | 1 |
| tc Rep: Chlorophyll a-b binding protein, chloroplast precursor - Petunia hybrida (Pe | 27.17   | 1 |
| gb FS418967 normalized full-length tobacco cDNA library Nicotiana tabacum cDNA       | 44.84   | 1 |
| Unknown                                                                              | 65.53   | 1 |
| gb KT7C.105N12F.051219T7 KT7 Nicotiana tabacum cDNA clone KT7C.105N12, mR            | 1012.42 | 1 |
| Unknown                                                                              | 640.95  | 1 |
| gb Nicotiana tabacum mRNA for aspartate aminotransferase, partial cds [AB12625]      | 100.33  | 1 |
| gb BP530798 MAT005 Nicotiana tabacum cDNA clone BY23059, mRNA sequence [E            | 402.89  | 1 |
| tc Rep: Triosephosphate isomerase - Solanum tuberosum (Potato), partial (49%) [T     | 1952.42 | 1 |
| Unknown                                                                              | 376.5   | 1 |
| tc Rep: Chromosome undetermined scaffold_30, whole genome shotgun sequence           | 32.16   | 1 |
| Unknown                                                                              | 253.3   | 1 |

|                                                                                         |         |   |
|-----------------------------------------------------------------------------------------|---------|---|
| gb TT-23_P04 K326 late senescent leaf library Nicotiana tabacum cDNA, mRNA seq          | 579.95  | 1 |
| Unknown                                                                                 | 216.29  | 1 |
| tc Rep: Chromosome chr1 scaffold_5, whole genome shotgun sequence - Vitis vinifera      | 525.42  | 1 |
| Unknown                                                                                 | 4611.31 | 1 |
| tc Rep: Chromosome chr8 scaffold_29, whole genome shotgun sequence - Vitis vinifera     | 104.59  | 1 |
| tc Rep: 14-3-3 protein - Nicotiana tabacum (Common tobacco), partial (98%) [TC44444]    | 25.57   | 1 |
| tc Rep: Hin19 - Nicotiana tabacum (Common tobacco), complete [TC51319]                  | 1369.84 | 1 |
| Unknown                                                                                 | 59.73   | 1 |
| gb AGN_RNC007xf06f1.ab1 AGN_RNC Nicotiana tabacum cDNA 5', mRNA sequencing              | 196.74  | 1 |
| tc Rep: Chromosome chr7 scaffold_20, whole genome shotgun sequence - Vitis vinifera     | 188.15  | 1 |
| tc Rep: Chromosome chr8 scaffold_23, whole genome shotgun sequence - Vitis vinifera     | 26.1    | 1 |
| tc Rep: Ribosomal protein L23 family protein - Solanum tuberosum (Potato), partial      | 53.33   | 1 |
| gb Nicotiana tabacum mRNA for cyclin B1 (cycB1 gene) [Z37978]                           | 32.07   | 1 |
| Unknown                                                                                 | 40.94   | 1 |
| Unknown                                                                                 | 23.16   | 1 |
| gb KP1B.103O13F.050725T7 KP1B Nicotiana tabacum cDNA clone KP1B.103O13, mRNA            | 171.64  | 1 |
| gb KG9B.003M18F.050720T7 KG9B Nicotiana tabacum cDNA clone KG9B.003M18, mRNA            | 49.75   | 1 |
| gb Nicotiana tabacum cDNA-AFLP-fragment BSTC21-4-280, cultivar Bright Yellow 2          | 45.33   | 1 |
| gb AM834279 seedling library, SL Nicotiana tabacum cDNA clone nt002087062, mRNA         | 19.68   | 1 |
| gb AGN_RNC019xc19f1.ab1 AGN_RNC Nicotiana tabacum cDNA 5', mRNA sequencing              | 434.05  | 1 |
| Unknown                                                                                 | 515.77  | 1 |
| Unknown                                                                                 | 362.98  | 1 |
| gb TT-13_C05 K326 late senescent leaf library Nicotiana tabacum cDNA, mRNA sequencing   | 750.86  | 1 |
| gb KP1B.001P15F.050628T7 KP1B Nicotiana tabacum cDNA clone KP1B.001P15, mRNA            | 25.81   | 1 |
| tc Rep: Cell division cycle protein 48 homolog - Capsicum annuum (Bell pepper), partial | 1373.7  | 1 |
| gb KR3B.110I14F.051111T7 KR3B Nicotiana tabacum cDNA clone KR3B.110I14, mRNA            | 1455.13 | 1 |
| Unknown                                                                                 | 97.51   | 1 |
| tc Rep: Chromosome chr13 scaffold_48, whole genome shotgun sequence - Vitis vinifera    | 19.76   | 1 |
| Unknown                                                                                 | 25.09   | 1 |
| tc Rep: Chromosome undetermined scaffold_279, whole genome shotgun sequencing           | 49.26   | 1 |
| tc Rep: Chromosome chr14 scaffold_21, whole genome shotgun sequence - Vitis vinifera    | 134.09  | 1 |
| gb KP1B.112H03F.060117T7 KP1B Nicotiana tabacum cDNA clone KP1B.112H03, mRNA            | 256.61  | 1 |
| gb KF8C.101H24F.051214T7 KF8C Nicotiana tabacum cDNA clone KF8C.101H24, mRNA            | 527.63  | 1 |
| gb KF8C.105N05F.051215T7 KF8C Nicotiana tabacum cDNA clone KF8C.105N05, mRNA            | 50154.1 | 1 |

|                                                                                       |         |   |
|---------------------------------------------------------------------------------------|---------|---|
| gb AGN_RNC014xm12f1.ab1 AGN_RNC Nicotiana tabacum cDNA 5', mRNA sequen                | 80.26   | 1 |
| Unknown                                                                               | 520.46  | 1 |
| gb AGN_RNC105xg07f1.ab1 AGN_RNC Nicotiana tabacum cDNA 5', mRNA sequenc               | 117.69  | 1 |
| Unknown                                                                               | 32.25   | 1 |
| gb KR3B.101J02F.051107T7 KR3B Nicotiana tabacum cDNA clone KR3B.101J02, mR            | 367.36  | 1 |
| gb KL5B.109A12F.060215T7 KL5B Nicotiana tabacum cDNA clone KL5B.109A12, mF            | 3235.21 | 1 |
| gb Nicotiana tabacum WD-repeat protein mRNA, complete cds [GQ260131]                  | 60.93   | 1 |
| tc Rep: Pm27 protein - Prunus mume (Japanese flowering apricot), partial (58%) [T     | 978.02  | 1 |
| Unknown                                                                               | 22.89   | 1 |
| Unknown                                                                               | 526.93  | 1 |
| Unknown                                                                               | 526.95  | 1 |
| tc Rep: Chromosome chr19 scaffold_4, whole genome shotgun sequence - Vitis vin        | 125.12  | 1 |
| gb FS414230 normalized full-length tobacco cDNA library Nicotiana tabacum cDNA        | 160.39  | 1 |
| Unknown                                                                               | 149.5   | 1 |
| gb KP1B.102I17F.050722T7 KP1B Nicotiana tabacum cDNA clone KP1B.102I17, mRI           | 19.59   | 1 |
| gb CHO_SL016xl10f1.ab1 CHO_SL Nicotiana tabacum cDNA, mRNA sequence [EH62             | 118.04  | 1 |
| Unknown                                                                               | 83.63   | 1 |
| tc Rep: Predicted protein - Coccidioides immitis, partial (12%) [TC55624]             | 40.65   | 1 |
| gb KG9B.101F22F.060120T7 KG9B Nicotiana tabacum cDNA clone KG9B.101F22, m             | 153.91  | 1 |
| tc Rep: Chromosome chr1 scaffold_5, whole genome shotgun sequence - Vitis vinif       | 50.6    | 1 |
| gb AGN_PNL233cf1_d7.trimmed.seq AGN_PNL Nicotiana tabacum cDNA 5', mRNA               | 773.28  | 1 |
| gb KF8C.105O04F.051215T7 KF8 Nicotiana tabacum cDNA clone KF8C.105O04, mRI            | 70.49   | 1 |
| gb KF8C.106P02F.051215T7 KF8 Nicotiana tabacum cDNA clone KF8C.106P02, mRN            | 144.27  | 1 |
| Unknown                                                                               | 1766.57 | 1 |
| gb TT-27_L08 Samsun trichome library Nicotiana tabacum cDNA, mRNA sequence [          | 178.05  | 1 |
| gb EST T1P015 Tobacco Leaves Express Library Nicotiana tabacum cDNA clone t1p3        | 40.63   | 1 |
| tc Rep: Eukaryotic translation initiation factor 2 beta subunit-like - Solanum tubero | 513.91  | 1 |
| gb AM838454 seedling library, SL Nicotiana tabacum cDNA clone nt002321027, mF         | 48.06   | 1 |
| tc Rep: Histone H4 [Contains: Osteogenic growth peptide (OGP)]. - Rattus norvegici    | 1120.1  | 1 |
| tc Rep: P40-like protein - Solanum tuberosum (Potato), partial (93%) [TC43627]        | 54.64   | 1 |
| gb TT-12_P07 tobacco leaf library Nicotiana tabacum cDNA, mRNA sequence [FG63         | 3187.88 | 1 |
| tc Rep: Cytosolic ascorbate peroxidase - Capsicum annuum (Bell pepper), partial (7)   | 3100.81 | 1 |
| gb KF8C.106J18F.051215T7 KF8 Nicotiana tabacum cDNA clone KF8C.106J18, mRN,           | 461.08  | 1 |
| tc Rep: NmrA-like family protein - Solanum demissum (Wild potato), partial (21%) [    | 300.96  | 1 |

|                                                                                      |          |   |
|--------------------------------------------------------------------------------------|----------|---|
| tc Rep: AML1 - Solanum tuberosum (Potato), partial (26%) [TC47870]                   | 19.61    | 1 |
| tc Rep: Chromosome chr7 scaffold_31, whole genome shotgun sequence - Vitis vin       | 106.64   | 1 |
| gb KG9B.004B18F.050721T7 KG9B Nicotiana tabacum cDNA clone KG9B.004B18, r            | 87.87    | 1 |
| gb AGN_RNC211xn23f1.ab1 AGN_RNC Nicotiana tabacum cDNA 5', mRNA sequenc              | 212.09   | 1 |
| tc Rep: Chromosome chr10 scaffold_179, whole genome shotgun sequence - Vitis v       | 512.76   | 1 |
| tc Rep: Chromosome chr16 scaffold_10, whole genome shotgun sequence - Vitis vi       | 56.69    | 1 |
| gb KL5B.104B08F.060207T7 KL5B Nicotiana tabacum cDNA clone KL5B.104B08, mR           | 117.88   | 1 |
| tc Rep: KH domain-containing protein-like - Oryza sativa subsp. japonica (Rice), par | 100.38   | 1 |
| Unknown                                                                              | 24.33    | 1 |
| Unknown                                                                              | 545.67   | 1 |
| Unknown                                                                              | 250.89   | 1 |
| Unknown                                                                              | 18.81    | 1 |
| tc Rep: Chromosome undetermined scaffold_30, whole genome shotgun sequence           | 168.78   | 1 |
| tc Rep: Glutathione S-transferase - Solanum commersonii (Commerson's wild potat      | 103.59   | 1 |
| tc Rep: Chromosome chr11 scaffold_13, whole genome shotgun sequence - Vitis vi       | 258.25   | 1 |
| tc Rep: SGT1 - Nicotiana benthamiana, partial (49%) [TC48609]                        | 27.06    | 1 |
| Unknown                                                                              | 194.86   | 1 |
| gb KP1B.112P05F.060117T7 KP1B Nicotiana tabacum cDNA clone KP1B.112P05, mF           | 183.48   | 1 |
| gb KG9B.005C19F.050721T7 KG9B Nicotiana tabacum cDNA clone KG9B.005C19, r            | 192.55   | 1 |
| Unknown                                                                              | 36.87    | 1 |
| Unknown                                                                              | 74.79    | 1 |
| gb KP1B.102H10F.050722T7 KP1B Nicotiana tabacum cDNA clone KP1B.102H10, m            | 262.58   | 1 |
| tc Rep: Chromosome chr7 scaffold_20, whole genome shotgun sequence - Vitis vin       | 41.99    | 1 |
| gb KG9B.103J22F.051128T7 KG9B Nicotiana tabacum cDNA clone KG9B.103J22, mF           | 107.11   | 1 |
| gb KN6B.115G01F.060127T7 KN6B Nicotiana tabacum cDNA clone KN6B.115G01, r            | 19.97    | 1 |
| gb KT7C.104N04F.051219T7 KT7 Nicotiana tabacum cDNA clone KT7C.104N04, mR            | 21.59    | 1 |
| gb KP1B.101E12F.050722T7 KP1B Nicotiana tabacum cDNA clone KP1B.101E12, mF           | 416.24   | 1 |
| gb CHO_SL006xj24f1.ab1 CHO_SL Nicotiana tabacum cDNA, mRNA sequence [EH61            | 91.81    | 1 |
| Unknown                                                                              | 48.41    | 1 |
| tc Rep: Chromosome undetermined scaffold_247, whole genome shotgun sequenc           | 29.37    | 1 |
| gb TT-36_B15 Samsun trichome library Nicotiana tabacum cDNA, mRNA sequence           | 56.77    | 1 |
| gb KL4B.104C21F.051104T7 KL4B Nicotiana tabacum cDNA clone KL4B.104C21, mR           | 631.68   | 1 |
| gb KF8B.200M19F.060120T7 KF8 Nicotiana tabacum cDNA clone KF8B.200M19, mF            | 91.09    | 1 |
| gb Nicotiana tabacum BYtuba mRNA for alpha tubulin, complete cds [AB052822]          | 44634.85 | 1 |

|                                                                                         |         |   |
|-----------------------------------------------------------------------------------------|---------|---|
| gb EST_FLW001xi17f1.ab1 EST_FLW Nicotiana tabacum cDNA, mRNA sequence [E-               | 172.03  | 1 |
| tc Rep: Chromosome chr5 scaffold_2, whole genome shotgun sequence - Vitis vinifera      | 581.43  | 1 |
| Unknown                                                                                 | 349.18  | 1 |
| gb Nicotiana tabacum rubisco activase precursor (Rca) mRNA, complete cds [U351:1]       | 17.16   | 1 |
| Unknown                                                                                 | 445.8   | 1 |
| gb AGN_ELP009xa18f1.ab1 AGN_ELP Nicotiana tabacum cDNA 5', mRNA sequence                | 27.25   | 1 |
| gb KP1B.108I18F.050726T7 KP1B Nicotiana tabacum cDNA clone KP1B.108I18, mRNA            | 68.22   | 1 |
| gb Nicotiana tabacum calcium-dependent protein kinase (CPK5) mRNA, complete cds         | 211.92  | 1 |
| gb KL4B.106D17F.051125T7 KL4B Nicotiana tabacum cDNA clone KL4B.106D17, mRNA            | 40.4    | 1 |
| gb KL4B.104G07F.051104T7 KL4B Nicotiana tabacum cDNA clone KL4B.104G07, mRNA            | 788.55  | 1 |
| tc Rep: Chromosome chr4 scaffold_39, whole genome shotgun sequence - Vitis vinifera     | 134.51  | 1 |
| Unknown                                                                                 | 565.88  | 1 |
| gb N.tabacum PKTL7 mRNA for protein kinase [X71057]                                     | 1525.61 | 1 |
| gb KT7C.105L12F.051219T7 KT7 Nicotiana tabacum cDNA clone KT7C.105L12, mRNA             | 75.5    | 1 |
| gb TT-20_O05 K326 late senescent leaf library Nicotiana tabacum cDNA, mRNA sequence     | 58.46   | 1 |
| tc Rep: Chromosome chr16 scaffold_86, whole genome shotgun sequence - Vitis vinifera    | 1572.7  | 1 |
| Unknown                                                                                 | 18.9    | 1 |
| gb D58-AD7 Ethylene Induced Tobacco Leaf cDNA Library Nicotiana tabacum cDNA            | 229.49  | 1 |
| Unknown                                                                                 | 43.53   | 1 |
| Unknown                                                                                 | 62.61   | 1 |
| Unknown                                                                                 | 193.99  | 1 |
| Unknown                                                                                 | 962.57  | 1 |
| Unknown                                                                                 | 80.74   | 1 |
| tc Rep: Predicted protein - Physcomitrella patens subsp. patens, partial (93%) [TC54]   | 999.1   | 1 |
| Unknown                                                                                 | 992.26  | 1 |
| Unknown                                                                                 | 123.38  | 1 |
| tc Rep: Chromosome chr4 scaffold_32, whole genome shotgun sequence - Vitis vinifera     | 929.95  | 1 |
| Unknown                                                                                 | 36.33   | 1 |
| tc Rep: Cholinephosphate cytidyltransferase - Pisum sativum (Garden pea), partial       | 3150.42 | 1 |
| tc Rep: Glutamate dehydrogenase A - Nicotiana plumbaginifolia (Leadwort-leaved tobacco) | 91.17   | 1 |
| Unknown                                                                                 | 17.65   | 1 |
| Unknown                                                                                 | 86.51   | 1 |
| tc Rep: Chromosome chr14 scaffold_27, whole genome shotgun sequence - Vitis vinifera    | 413.7   | 1 |
| Unknown                                                                                 | 467.73  | 1 |



|                                                                                    |         |   |
|------------------------------------------------------------------------------------|---------|---|
| Unknown                                                                            | 27.83   | 1 |
| gb KP1B.103L09F.050725T7 KP1B Nicotiana tabacum cDNA clone KP1B.103L09, mF         | 3985.69 | 1 |
| Unknown                                                                            | 81.57   | 1 |
| tc Rep: Lipoygenase - Nicotiana attenuata, partial (32%) [TC51546]                 | 71.54   | 1 |
| tc Rep: Chromosome chr5 scaffold_2, whole genome shotgun sequence - Vitis vinif    | 131.59  | 1 |
| gb KG9B.002B09F.050720T7 KG9B Nicotiana tabacum cDNA clone KG9B.002B09, r          | 23.59   | 1 |
| tc Rep: RRM-containing RNA-binding protein-like protein - Solanum tuberosum (Po    | 48.51   | 1 |
| gb Nicotiana tabacum SR1 6,7-dimethyl-8-ribityllumazine synthase precursor mRN     | 43.68   | 1 |
| gb TT-36_A02 K326 early senescent leaf library Nicotiana tabacum cDNA, mRNA se     | 107.92  | 1 |
| tc Rep: Chromosome chr11 scaffold_13, whole genome shotgun sequence - Vitis vi     | 48.44   | 1 |
| tc Rep: Chromosome chr16 scaffold_86, whole genome shotgun sequence - Vitis vi     | 140.24  | 1 |
| Unknown                                                                            | 23.03   | 1 |
| gb Nicotiana tabacum mRNA for ferredoxin-NADP oxidoreductase, complete cds [A      | 103.37  | 1 |
| tc Rep: Genomic DNA, chromosome 3, TAC clone:K24M9 - Arabidopsis thaliana (M       | 267.33  | 1 |
| gb TOBESTR133B11 TOBEST cDNA library 1 Nicotiana tabacum cDNA 5', mRNA seq         | 65.98   | 1 |
| gb BP530353 MAT005 Nicotiana tabacum cDNA clone BY21369, mRNA sequence [E          | 23.67   | 1 |
| Unknown                                                                            | 18.03   | 1 |
| gb KP1B.001M05F.050628T7 KP1B Nicotiana tabacum cDNA clone KP1B.001M05, r          | 42.58   | 1 |
| gb KP1B.101G19F.050722T7 KP1B Nicotiana tabacum cDNA clone KP1B.101G19, m          | 177.86  | 1 |
| gb KN6B.101N11F.051230T7 KN6B Nicotiana tabacum cDNA clone KN6B.101N11, r          | 649.2   | 1 |
| gb TL13.109B21F.060320T7 TL13 Nicotiana tabacum cDNA clone TL13.109B21, mR         | 64.12   | 1 |
| Unknown                                                                            | 1439.9  | 1 |
| gb AGN_ELP010xn14f1.ab1 AGN_ELP Nicotiana tabacum cDNA 5', mRNA sequence           | 31.51   | 1 |
| gb BL12.100O18F.060308T7 BL12 Nicotiana tabacum cDNA clone BL12.100O18, mF         | 85.35   | 1 |
| tc Rep: Chromosome chr5 scaffold_2, whole genome shotgun sequence - Vitis vinif    | 75.98   | 1 |
| gb KF8C.103P09F.051214T7 KF8 Nicotiana tabacum cDNA clone KF8C.103P09, mRN         | 144.81  | 1 |
| Unknown                                                                            | 213.84  | 1 |
| Unknown                                                                            | 247.09  | 1 |
| gb TT-38_E01 Samsun trichome library Nicotiana tabacum cDNA, mRNA sequence         | 24.08   | 1 |
| tc Rep: Chromosome chr11 scaffold_14, whole genome shotgun sequence - Vitis vi     | 349.11  | 1 |
| tc Rep: Chromosome undetermined scaffold_225, whole genome shotgun sequenc         | 235.16  | 1 |
| gb TOBESTR055D06 TOBEST cDNA library 1 Nicotiana tabacum cDNA 5', mRNA seq         | 581.21  | 1 |
| tc Rep: Chromosome chr15 scaffold_40, whole genome shotgun sequence - Vitis vi     | 37.48   | 1 |
| tc Rep: Mini zinc finger protein - Solanum lycopersicum (Tomato) (Lycopersicon esc | 22.96   | 1 |

|                                                                                        |         |   |
|----------------------------------------------------------------------------------------|---------|---|
| Unknown                                                                                | 4651.56 | 1 |
| Unknown                                                                                | 100.63  | 1 |
| tc Rep: Chromosome chr13 scaffold_17, whole genome shotgun sequence - Vitis vi         | 240.4   | 1 |
| gb TT-36_L19 K326 late senescent leaf library Nicotiana tabacum cDNA, mRNA seq         | 30.22   | 1 |
| Unknown                                                                                | 420.08  | 1 |
| tc Rep: Chromosome chr5 scaffold_2, whole genome shotgun sequence - Vitis vinif        | 58.36   | 1 |
| gb Nicotiana tabacum cDNA-AFLP-fragment BSTT21-1-270, cultivar Bright Yellow 2         | 21.96   | 1 |
| gb AM783661 seedling library, SL Nicotiana tabacum cDNA clone nt002328038, mF          | 107.15  | 1 |
| Unknown                                                                                | 512.12  | 1 |
| tc Rep: Histone H2A - Vitis vinifera (Grape), partial (97%) [TC42842]                  | 1017.21 | 1 |
| Unknown                                                                                | 54.49   | 1 |
| tc Rep: Chromosome chr8 scaffold_88, whole genome shotgun sequence - Vitis vin         | 190.01  | 1 |
| Unknown                                                                                | 324.72  | 1 |
| tc Rep: Chromosome undetermined scaffold_161, whole genome shotgun sequenc             | 376.01  | 1 |
| tc Rep: Mitochondrial carnitine/acylcarnitine carrier-like protein - Arabidopsis thali | 179.73  | 1 |
| Unknown                                                                                | 48.65   | 1 |
| Unknown                                                                                | 134.5   | 1 |
| Unknown                                                                                | 392.27  | 1 |
| gb TT-30_F12 tobacco leaf library Nicotiana tabacum cDNA, mRNA sequence [FG63          | 19.02   | 1 |
| gb KN6B.009J12F.050901T7 KN6B Nicotiana tabacum cDNA clone KN6B.009J12, mF             | 152.72  | 1 |
| tc Rep: Hydroxyphenylpyruvate reductase - Solenostemon scutellarioides (Coleus) (      | 217.2   | 1 |
| tc Rep: Chromosome chr18 scaffold_137, whole genome shotgun sequence - Vitis v         | 1641.16 | 1 |
| Unknown                                                                                | 25.77   | 1 |
| gb KN6B.114A23F.060127T7 KN6B Nicotiana tabacum cDNA clone KN6B.114A23, n              | 84.14   | 1 |
| gb Nicotiana tabacum EIG-I24 mRNA, complete cds [AB041514]                             | 1391.73 | 1 |
| gb KP1B.108O07F.050726T7 KP1B Nicotiana tabacum cDNA clone KP1B.108O07, m              | 163.99  | 1 |
| Unknown                                                                                | 54.66   | 1 |
| tc Rep: NAD-dependent epimerase/dehydratase family protein-like protein - Solan        | 11694.3 | 1 |
| tc Rep: 26S protease regulatory subunit 6B homolog - Solanum tuberosum (Potato)        | 468.59  | 1 |
| Unknown                                                                                | 169.65  | 1 |
| gb CHO_SL012xa06f1.ab1 CHO_SL Nicotiana tabacum cDNA 5', mRNA sequence [FC             | 1140.16 | 1 |
| gb KL4B.112G15F.060131T7 KL4B Nicotiana tabacum cDNA clone KL4B.112G15, mF             | 62.85   | 1 |
| tc Rep: Cytochrome b-c1 complex subunit 8 - Solanum tuberosum (Potato), comple         | 1796.08 | 1 |
| gb KF8C.109O24F.051215T7 KF8 Nicotiana tabacum cDNA clone KF8C.109O24, mRl             | 86.07   | 1 |

|                                                                                              |         |   |
|----------------------------------------------------------------------------------------------|---------|---|
| Unknown                                                                                      | 276.15  | 1 |
| gb KP1B.107I12F.050726T7 KP1B Nicotiana tabacum cDNA clone KP1B.107I12, mR                   | 104.29  | 1 |
| Unknown                                                                                      | 171.22  | 1 |
| tc Rep: Poly(A)-binding protein - Nicotiana tabacum (Common tobacco), complete               | 856.4   | 1 |
| Unknown                                                                                      | 45.99   | 1 |
| gb Nicotiana tabacum mRNA for ras-related protein RAB8-5, complete cds [AB079C               | 17079.9 | 1 |
| gb Nicotiana tabacum NTH23 mRNA, complete cds [AB004797]                                     | 231.16  | 1 |
| Unknown                                                                                      | 35.55   | 1 |
| tc Rep: Chromosome undetermined scaffold_123, whole genome shotgun sequenc                   | 56.14   | 1 |
| tc Rep: Chromosome chr12 scaffold_18, whole genome shotgun sequence - Vitis vi               | 25.52   | 1 |
| tc Rep: Heat shock protein 70-3 - Nicotiana tabacum (Common tobacco), partial (3:            | 610.65  | 1 |
| gb KT7C.104N15F.051219T7 KT7 Nicotiana tabacum cDNA clone KT7C.104N15, mR                    | 218.22  | 1 |
| Unknown                                                                                      | 266.77  | 1 |
| gb TT-40_D01 K326 late senescent leaf library Nicotiana tabacum cDNA, mRNA seq               | 11051.1 | 1 |
| gb AGN_PNL221bf1_d2.trimmed.seq AGN_PNL Nicotiana tabacum cDNA 5', mRNA                      | 31.94   | 1 |
| gb TT-16_K24 K326 early senescent leaf library Nicotiana tabacum cDNA, mRNA se               | 137.33  | 1 |
| gb CHO_SL019xb08f1.ab1 CHO_SL Nicotiana tabacum cDNA, mRNA sequence [EH6                     | 439.45  | 1 |
| Unknown                                                                                      | 251.59  | 1 |
| gb Nicotiana tabacum extracellular Ca <sup>2+</sup> sensing receptor (cas) mRNA, complete cc | 35.29   | 1 |
| tc Rep: Rab1-like small GTP-binding protein - Petunia hybrida (Petunia), complete [          | 254.16  | 1 |
| Unknown                                                                                      | 22.95   | 1 |
| gb CHO_SL010xl21f1.ab1 CHO_SL Nicotiana tabacum cDNA, mRNA sequence [EH61                    | 30.79   | 1 |
| gb KG9B.002F12F.050720T7 KG9B Nicotiana tabacum cDNA clone KG9B.002F12, m                    | 104.43  | 1 |
| gb TT-10_C03 Samsun trichome library Nicotiana tabacum cDNA, mRNA sequence                   | 48.79   | 1 |
| tc Rep: Chromosome chr15 scaffold_40, whole genome shotgun sequence - Vitis vi               | 1167.5  | 1 |
| tc Rep: Late embryogenesis abundant protein 5 - Nicotiana tabacum (Common tobac              | 498.39  | 1 |
| gb CHO_SL006xl08f1.ab1 CHO_SL Nicotiana tabacum cDNA 5', mRNA sequence [FG                   | 135.18  | 1 |
| gb TT-21_K02 K326 late senescent leaf library Nicotiana tabacum cDNA, mRNA seq               | 407.1   | 1 |
| tc Rep: Chromosome undetermined scaffold_52, whole genome shotgun sequence                   | 182.91  | 1 |
| Unknown                                                                                      | 80.57   | 1 |
| Unknown                                                                                      | 763.5   | 1 |
| gb AGN_RNC120xl16f1.ab1 AGN_RNC Nicotiana tabacum cDNA 5', mRNA sequenc                      | 23.01   | 1 |
| gb BP133167 MAT001 Nicotiana tabacum cDNA clone BY5404, mRNA sequence [BF                    | 185.06  | 1 |
| tc Rep: Lysine decarboxylase-like protein At5g11950 - Arabidopsis thaliana (Mouse-           | 80.6    | 1 |

|                                                                                      |         |   |
|--------------------------------------------------------------------------------------|---------|---|
| Unknown                                                                              | 18.74   | 1 |
| tc Rep: VAP27 - Nicotiana plumbaginifolia (Leadwort-leaved tobacco), partial (49%)   | 509.22  | 1 |
| gb N.tabacum mRNA for NAD-dependent isocitrate dehydrogenase [X96727]                | 3267.07 | 1 |
| tc AAD43171.1 - Arabidopsis thaliana (Mouse-ear cress), partial (79%) [TC47386]      | 554.67  | 1 |
| tc Rep: LRR protein - Solanum lycopersicum (Tomato) (Lycopersicon esculentum), p     | 536.59  | 1 |
| Unknown                                                                              | 76.72   | 1 |
| Unknown                                                                              | 19.03   | 1 |
| tc Rep: Calmodulin-related protein - Petunia hybrida (Petunia), partial (83%) [TC706 | 79.85   | 1 |
| tc Rep: Avr9/Cf-9 rapidly elicited protein 65 - Nicotiana tabacum (Common tobacco)   | 85.33   | 1 |
| tc Rep: Cellulose synthase - Populus tremula x Populus tremuloides, partial (33%) [T | 30.09   | 1 |
| tc Rep: DNA-directed RNA polymerase IIb - Nicotiana tabacum (Common tobacco),        | 139.74  | 1 |
| tc Rep: Chromosome chr4 scaffold_162, whole genome shotgun sequence - Vitis vi       | 24.27   | 1 |
| Unknown                                                                              | 414.88  | 1 |
| gb AGN_RNC110xf12f1.ab1 AGN_RNC Nicotiana tabacum cDNA 5', mRNA sequenc              | 182.49  | 1 |
| tc Rep: Allyl alcohol dehydrogenase - Nicotiana tabacum (Common tobacco), comp       | 359.4   | 1 |
| Unknown                                                                              | 36.98   | 1 |
| Unknown                                                                              | 289.48  | 1 |
| gb Nicotiana tabacum SR1 Nt-rab11a mRNA, complete cds [L29271]                       | 534.09  | 1 |
| tc Rep: Chromosome chr6 scaffold_3, whole genome shotgun sequence - Vitis vinif      | 70.32   | 1 |
| tc Rep: Heat shock cognate 70 kDa protein - Petunia hybrida (Petunia), partial (43%  | 170.34  | 1 |
| Unknown                                                                              | 63.44   | 1 |
| gb AGN_RNC127xg06f1.ab1 AGN_RNC Nicotiana tabacum cDNA 5', mRNA sequenc              | 258.56  | 1 |
| gb KR2B.110A15F.051229T7 KR2B Nicotiana tabacum cDNA clone KR2B.110A15, m            | 1653.78 | 1 |
| gb KR3B.112M13F.060119T7 KR3B Nicotiana tabacum cDNA clone KR3B.112M13, r            | 760.58  | 1 |
| gb AGN_PNL219cf1_d4.trimmed.seq AGN_PNL Nicotiana tabacum cDNA 5', mRNA              | 767.49  | 1 |
| gb TT-20_M23 Samsun trichome library Nicotiana tabacum cDNA, mRNA sequence           | 4132.55 | 1 |
| tc Rep: Proteasome subunit beta type - Vitis vinifera (Grape), complete [TC54925]    | 27.65   | 1 |
| gb TT-05_C12 K326 early senescent leaf library Nicotiana tabacum cDNA, mRNA se       | 112.46  | 1 |
| tc Rep: Os01g0861000 protein - Oryza sativa subsp. japonica (Rice), partial (20%) [T | 25.51   | 1 |
| gb AGN_RNC127xe18f1.ab1 AGN_RNC Nicotiana tabacum cDNA 5', mRNA sequenc              | 103.09  | 1 |
| Unknown                                                                              | 59.62   | 1 |
| gb AGN_ELP008xp13f1.ab1 AGN_ELP Nicotiana tabacum cDNA 5', mRNA sequence             | 48.86   | 1 |
| Unknown                                                                              | 19.33   | 1 |
| gb KL4B.111N06F.060128T7 KL4B Nicotiana tabacum cDNA clone KL4B.111N06, mf           | 26.91   | 1 |

|                                                                                                        |         |   |
|--------------------------------------------------------------------------------------------------------|---------|---|
| gb AM804984 seedling library, SL Nicotiana tabacum cDNA clone nt002163074, mRNA sequence [EH6]         | 514.56  | 1 |
| gb AGN_RNC117xc19r1.ab1 AGN_RNC Nicotiana tabacum cDNA 3', mRNA sequence [EH6]                         | 69.21   | 1 |
| gb KF8C.101G12F.051214T7 KF8 Nicotiana tabacum cDNA clone KF8C.101G12, mRNA sequence [EH6]             | 48.35   | 1 |
| tc Rep: Prephenate dehydratase - Ipomoea trifida (Morning glory), partial (51%) [TC47]                 | 24.93   | 1 |
| tc Rep: Chromosome chr1 scaffold_5, whole genome shotgun sequence - Vitis vinifera cv. 'Pinot Noir'    | 395.01  | 1 |
| Unknown                                                                                                | 702.78  | 1 |
| tc Rep: Aspartic proteinase - Theobroma cacao (Cacao) (Cocoa), partial (95%) [TC47]                    | 7597.34 | 1 |
| tc Rep: Chromosome chr11 scaffold_170, whole genome shotgun sequence - Vitis vinifera cv. 'Pinot Noir' | 10363.5 | 1 |
| tc Rep: Chromosome chr7 scaffold_31, whole genome shotgun sequence - Vitis vinifera cv. 'Pinot Noir'   | 67.49   | 1 |
| tc Rep: Chromosome chr4 scaffold_6, whole genome shotgun sequence - Vitis vinifera cv. 'Pinot Noir'    | 187.28  | 1 |
| Unknown                                                                                                | 28.36   | 1 |
| tc Rep: Chromosome chr5 scaffold_64, whole genome shotgun sequence - Vitis vinifera cv. 'Pinot Noir'   | 53.84   | 1 |
| gb CHO_SL018xn22f1.ab1 CHO_SL Nicotiana tabacum cDNA, mRNA sequence [EH6]                              | 2821.21 | 1 |
| Unknown                                                                                                | 62.54   | 1 |
| gb Nicotiana tabacum cDNA-AFLP fragment H-N_BT1M21-375 sequence [DQ46017]                              | 33.07   | 1 |
| Unknown                                                                                                | 57.34   | 1 |
| gb TT-06_G20 Burley21 trichome library Nicotiana tabacum cDNA, mRNA sequence [FC]                      | 1097.98 | 1 |
| tc Rep: SSU ribosomal protein S1P - Pediococcus pentosaceus (strain ATCC 25745 / DSM 17284)            | 18.52   | 1 |
| gb Nicotiana tabacum pollen specific LIM domain protein 1b mRNA, complete cds [FC]                     | 10220.2 | 1 |
| gb TT-11_G22 K326 trichome library Nicotiana tabacum cDNA, mRNA sequence [FC]                          | 146.06  | 1 |
| Unknown                                                                                                | 25.79   | 1 |
| tc Rep: Eukaryotic translation initiation factor 5A-1 - Nicotiana plumbaginifolia (Leaf)               | 224.43  | 1 |
| tc Rep: T23J18.17 - Arabidopsis thaliana (Mouse-ear cress), partial (12%) [TC48947]                    | 46.09   | 1 |
| tc Rep: Proton pump interactor - Arabidopsis thaliana (Mouse-ear cress), partial (12%) [TC48947]       | 673.07  | 1 |
| gb TT-39_G05 K326 early senescent leaf library Nicotiana tabacum cDNA, mRNA sequence [FC]              | 623.15  | 1 |
| Unknown                                                                                                | 87.23   | 1 |
| gb CHO_SL011xo17f1.ab1 CHO_SL Nicotiana tabacum cDNA, mRNA sequence [EH6]                              | 567.59  | 1 |
| gb CHO_SL008xe01f1.ab1 CHO_SL Nicotiana tabacum cDNA, mRNA sequence [EH6]                              | 113.35  | 1 |
| gb TT-29_E04 Samsun trichome library Nicotiana tabacum cDNA, mRNA sequence [FC]                        | 143.54  | 1 |
| tc Rep: Chromosome chr14 scaffold_9, whole genome shotgun sequence - Vitis vinifera cv. 'Pinot Noir'   | 211.63  | 1 |
| gb Nicotiana tabacum partial mRNA for cullin 1D (cul1D gene) [AJ344536]                                | 40.56   | 1 |
| tc Rep: Chromosome chr3 scaffold_8, whole genome shotgun sequence - Vitis vinifera cv. 'Pinot Noir'    | 63.28   | 1 |
| Unknown                                                                                                | 279.3   | 1 |
| tc Rep: Chromosome chr18 scaffold_59, whole genome shotgun sequence - Vitis vinifera cv. 'Pinot Noir'  | 982.63  | 1 |

|                                                                                     |         |   |
|-------------------------------------------------------------------------------------|---------|---|
| tc Rep: 60s acidic ribosomal protein - Prunus dulcis (Almond) (Prunus amygdalus), Ꞥ | 38.16   | 1 |
| Unknown                                                                             | 207.17  | 1 |
| Unknown                                                                             | 31.6    | 1 |
| Unknown                                                                             | 209.37  | 1 |
| gb KR2B.102B10F.051227T7 KR2B Nicotiana tabacum cDNA clone KR2B.102B10, m           | 1393.97 | 1 |
| tc Rep: Chromosome chr7 scaffold_20, whole genome shotgun sequence - Vitis vin      | 70.58   | 1 |
| Unknown                                                                             | 101.32  | 1 |
| tc Rep: Chromosome chr14 scaffold_9, whole genome shotgun sequence - Vitis vin      | 41.35   | 1 |
| tc Rep: Chromosome chr12 scaffold_18, whole genome shotgun sequence - Vitis vi      | 34.89   | 1 |
| gb KG9B.001M14F.050628T7 KG9B Nicotiana tabacum cDNA clone KG9B.001M14,             | 264.53  | 1 |
| gb KF8B.201A15F.060124T7 KF8 Nicotiana tabacum cDNA clone KF8B.201A15, mRN          | 22.86   | 1 |
| Unknown                                                                             | 516.51  | 1 |
| tc Rep: Chromosome chr17 scaffold_16, whole genome shotgun sequence - Vitis vi      | 20.8    | 1 |
| gb KG9B.005B04F.050721T7 KG9B Nicotiana tabacum cDNA clone KG9B.005B04, m           | 276.61  | 1 |
| tc Rep: Chromosome chr10 scaffold_50, whole genome shotgun sequence - Vitis vi      | 1094.74 | 1 |
| gb KP1B.001G12F.050628T7 KP1B Nicotiana tabacum cDNA clone KP1B.001G12, m           | 712.53  | 1 |
| tc Rep: Chromosome chr3 scaffold_199, whole genome shotgun sequence - Vitis vi      | 4393.18 | 1 |
| gb TT-02_E03 Samsun trichome library Nicotiana tabacum cDNA, mRNA sequence          | 1326.88 | 1 |
| tc Rep: Autophagy protein beclin1 - Nicotiana benthamiana, partial (47%) [TC50648   | 51.02   | 1 |
| gb AGN_RNC007xj09f1.ab1 AGN_RNC Nicotiana tabacum cDNA 5', mRNA sequenc             | 34.64   | 1 |
| Unknown                                                                             | 72.26   | 1 |
| Unknown                                                                             | 20.75   | 1 |
| tc Rep: Chromosome chr4 scaffold_6, whole genome shotgun sequence - Vitis vinif     | 191.26  | 1 |
| gb AM791353 seedling library, SL Nicotiana tabacum cDNA clone nt002082049, mF       | 18.81   | 1 |
| gb KR3B.110P02F.051111T7 KR3B Nicotiana tabacum cDNA clone KR3B.110P02, mI          | 22.65   | 1 |
| tc Rep: Chromosome chr19 scaffold_4, whole genome shotgun sequence - Vitis vin      | 25.82   | 1 |
| gb AGN_ELP026xc22f1.ab1 AGN_ELP Nicotiana tabacum cDNA 5', mRNA sequence            | 21.95   | 1 |
| gb TT-14_L16 tobacco leaf library Nicotiana tabacum cDNA, mRNA sequence [FG63       | 802.08  | 1 |
| gb KR3B.102P19F.051107T7 KR3B Nicotiana tabacum cDNA clone KR3B.102P19, mI          | 45.91   | 1 |
| tc Rep: Chromosome chr16 scaffold_10, whole genome shotgun sequence - Vitis vi      | 108.13  | 1 |
| Unknown                                                                             | 34.31   | 1 |
| tc Rep: Ubiquitin carrier protein - Capsicum annuum (Bell pepper), complete [TC50   | 572.89  | 1 |
| gb AGN_RNC112xa13f1.ab1 AGN_RNC Nicotiana tabacum cDNA 5', mRNA sequenc             | 22.89   | 1 |
| Unknown                                                                             | 1035.67 | 1 |

|                                                                                     |          |   |
|-------------------------------------------------------------------------------------|----------|---|
| tc Rep: Chromosome chr11 scaffold_56, whole genome shotgun sequence - Vitis vi      | 228.73   | 1 |
| Unknown                                                                             | 22.22    | 1 |
| gb KR3B.114I24F.060119T7 KR3B Nicotiana tabacum cDNA clone KR3B.114I24, mRI         | 25.72    | 1 |
| Unknown                                                                             | 11096.9  | 1 |
| tc Rep: Chromosome undetermined scaffold_155, whole genome shotgun sequenc          | 5331.15  | 1 |
| Unknown                                                                             | 27.34    | 1 |
| Unknown                                                                             | 237.86   | 1 |
| gb Nicotiana tabacum MADS-box protein MADS5 (NtMADS5) mRNA, complete cds            | 93.36    | 1 |
| Unknown                                                                             | 95.65    | 1 |
| gb AM833244 DL, diurnal library Nicotiana tabacum cDNA clone nt005091082, mRI       | 20.17    | 1 |
| tc Rep: Chromosome chr16 scaffold_10, whole genome shotgun sequence - Vitis vi      | 36.2     | 1 |
| tc Rep: Ubiquitin-fusion degradation protein-like - Arabidopsis thaliana (Mouse-ear | 85       | 1 |
| gb KF8C.109O22F.051215T7 KF8 Nicotiana tabacum cDNA clone KF8C.109O22, mRI          | 38.21    | 1 |
| tc Rep: Chromosome chr5 scaffold_2, whole genome shotgun sequence - Vitis vinif     | 555.67   | 1 |
| gb KT7C.104A06F.051219T7 KT7 Nicotiana tabacum cDNA clone KT7C.104A06, mRI          | 253.73   | 1 |
| Unknown                                                                             | 20.98    | 1 |
| tc Rep: 2-isopropylmalate synthase B - Solanum pennellii (Tomato) (Lycopersicon p   | 21.59    | 1 |
| gb TT-09_H15 Burley21 trichome library Nicotiana tabacum cDNA, mRNA sequence        | 94.06    | 1 |
| gb AGN_RNC014xn22f1.ab1 AGN_RNC Nicotiana tabacum cDNA 5', mRNA sequenc             | 204.61   | 1 |
| tc Rep: Betaine aldehyde dehydrogenase - Amaranthus hypochondriacus (Prince-of      | 44.98    | 1 |
| Unknown                                                                             | 17.68    | 1 |
| gb FS416721 normalized full-length tobacco cDNA library Nicotiana tabacum cDNA      | 146.53   | 1 |
| gb TT-03_G14 Burley21 trichome library Nicotiana tabacum cDNA, mRNA sequence        | 379.55   | 1 |
| tc Rep: Chromosome chr2 scaffold_176, whole genome shotgun sequence - Vitis vi      | 30.67    | 1 |
| gb TL13.103C23F.060313T7 TL13 Nicotiana tabacum cDNA clone TL13.103C23, mRI         | 40.19    | 1 |
| gb KF8B.202F11F.060124T7 KF8 Nicotiana tabacum cDNA clone KF8B.202F11, mRN          | 49327.65 | 1 |
| tc Rep: Syntaxin - Glycine max (Soybean), partial (87%) [TC44874]                   | 85.3     | 1 |
| gb KF8C.106A11F.051215T7 KF8 Nicotiana tabacum cDNA clone KF8C.106A11, mRN          | 52.98    | 1 |
| gb TT-16_C09 Samsun trichome library Nicotiana tabacum cDNA, mRNA sequence          | 29.63    | 1 |
| tc CPY18934 Solanum nigrum chloroplast tRNA-Ala, tRNA-Ile, 16S rRNA, tRNA-Val, i    | 88.73    | 1 |
| gb KL4B.101K21F.051103T7 KL4B Nicotiana tabacum cDNA clone KL4B.101K21, mR          | 54.89    | 1 |
| gb KL4B.102J10F.051125T7 KL4B Nicotiana tabacum cDNA clone KL4B.102J10, mRN         | 28.41    | 1 |
| gb Nicotiana tabacum geranylgeranylated protein NTGP3 mRNA, complete cds [U6        | 90.66    | 1 |
| tc Rep: Chromosome chr7 scaffold_31, whole genome shotgun sequence - Vitis vin      | 1066.97  | 1 |

|                                                                                     |         |   |
|-------------------------------------------------------------------------------------|---------|---|
| Unknown                                                                             | 35.75   | 1 |
| gb N.tabacum mRNA for protein phosphatase 2A, 65kD regulatory subunit [X97913       | 953.5   | 1 |
| Unknown                                                                             | 197.5   | 1 |
| tc Rep: WD40-like beta propeller repeat protein - Synechococcus sp. (strain JA-2-3E | 108.02  | 1 |
| gb BP132634 MAT001 Nicotiana tabacum cDNA clone BY4821, mRNA sequence [BF           | 96.31   | 1 |
| gb CHO_SL026xo06f1.ab1 CHO_SL Nicotiana tabacum cDNA, mRNA sequence [EH6            | 33.16   | 1 |
| gb KN6B.110N02F.060106T7 KN6B Nicotiana tabacum cDNA clone KN6B.110N02, r           | 58.98   | 1 |
| gb KP1B.037H23F.050628T7 KP1B Nicotiana tabacum cDNA clone KP1B.037H23, m           | 129.19  | 1 |
| gb EST_FLW005xi04f1.ab1 EST_FLW Nicotiana tabacum cDNA, mRNA sequence [E            | 32710.8 | 1 |
| gb KF8C.106C22F.051215T7 KF8 Nicotiana tabacum cDNA clone KF8C.106C22, mRN          | 1786.31 | 1 |
| Unknown                                                                             | 38.5    | 1 |
| Unknown                                                                             | 265.6   | 1 |
| Unknown                                                                             | 478.8   | 1 |
| tc Rep: Chromosome chr1 scaffold_5, whole genome shotgun sequence - Vitis vinif     | 207.12  | 1 |
| tc Rep: Actin depolymerizing factor - Nicotiana benthamiana, partial (22%) [TC6865  | 132.23  | 1 |
| gb KL4B.103E17F.051103T7 KL4B Nicotiana tabacum cDNA clone KL4B.103E17, mR          | 637.25  | 1 |
| gb TT-12_N13 Samsun trichome library Nicotiana tabacum cDNA, mRNA sequence          | 91.89   | 1 |
| gb TT-03_L11 K326 trichome library Nicotiana tabacum cDNA, mRNA sequence [FG        | 1304.71 | 1 |
| Unknown                                                                             | 147.3   | 1 |
| tc Rep: ABC oligo-dipeptide/nickel transporter, permease subunit precursor - Yersin | 773.41  | 1 |
| tc Rep: Chromosome chr4 scaffold_6, whole genome shotgun sequence - Vitis vinif     | 127.93  | 1 |
| gb Nicotiana tabacum Avr9 [AY220483]                                                | 1375.79 | 1 |
| Unknown                                                                             | 258.76  | 1 |
| gb Nicotiana tabacum phospholipase C2 mRNA, complete cds [AF223573]                 | 21.34   | 1 |
| Unknown                                                                             | 343.13  | 1 |
| tc Rep: Chloroplast 30S ribosomal protein S16 - Nicotiana glauca (Wood tobacco      | 782.91  | 1 |
| gb KN6B.105H12F.060104T7 KN6B Nicotiana tabacum cDNA clone KN6B.105H12, n           | 1510.33 | 1 |
| Unknown                                                                             | 598.78  | 1 |
| tc Rep: Chromosome chr19 scaffold_111, whole genome shotgun sequence - Vitis v      | 25.06   | 1 |
| Unknown                                                                             | 24.8    | 1 |
| tc Rep: Chromosome chr11 scaffold_13, whole genome shotgun sequence - Vitis vi      | 79.09   | 1 |
| gb BP534246 MAT005 Nicotiana tabacum cDNA clone BY32203, mRNA sequence [E           | 18.86   | 1 |
| gb Nicotiana tabacum mRNA for myo-inositol 1-phosphate synthase, complete cds       | 673.11  | 1 |
| Unknown                                                                             | 178.91  | 1 |



|                                                                                    |          |   |
|------------------------------------------------------------------------------------|----------|---|
| tc Rep: Heat shock protein 90 - Nicotiana tabacum (Common tobacco), complete [T    | 24.94    | 1 |
| Unknown                                                                            | 124.88   | 1 |
| gb AGN_RPC009xh11f1.ab1 AGN_RPC Nicotiana tabacum cDNA 5', mRNA sequenc            | 795.03   | 1 |
| tc Rep: Ribosomal protein L39 - Triticum aestivum (Wheat), complete [TC62239]      | 51.16    | 1 |
| tc Rep: UDP-glucuronate 4-epimerase 2 - Arabidopsis thaliana (Mouse-ear cress), p  | 3011.9   | 1 |
| tc Rep: MYC transcription factor - Solanum tuberosum (Potato), partial (29%) [TC4€ | 209.46   | 1 |
| gb TT-48_M13 Samsun trichome library Nicotiana tabacum cDNA, mRNA sequence         | 34.27    | 1 |
| tc Rep: Chromosome chr1 scaffold_166, whole genome shotgun sequence - Vitis vi     | 1470.22  | 1 |
| tc Rep: Chromosome chr18 scaffold_1, whole genome shotgun sequence - Vitis vin     | 43.14    | 1 |
| tc Rep: Chromosome chr19 scaffold_4, whole genome shotgun sequence - Vitis vin     | 556.01   | 1 |
| tc Rep: 40S ribosomal protein S4 - Solanum tuberosum (Potato), complete [TC4036    | 41.87    | 1 |
| Unknown                                                                            | 73.65    | 1 |
| Unknown                                                                            | 20.7     | 1 |
| Unknown                                                                            | 89.67    | 1 |
| Unknown                                                                            | 246.25   | 1 |
| tc Rep: Chromosome chr6 scaffold_3, whole genome shotgun sequence - Vitis vinif    | 50.06    | 1 |
| gb KR3B.112E20F.060119T7 KR3B Nicotiana tabacum cDNA clone KR3B.112E20, ml         | 79.47    | 1 |
| Unknown                                                                            | 268.17   | 1 |
| tc Rep: Chromosome chr7 scaffold_31, whole genome shotgun sequence - Vitis vin     | 18.48    | 1 |
| gb KF8C.105B07F.051215T7 KF8 Nicotiana tabacum cDNA clone KF8C.105B07, mRN         | 182.58   | 1 |
| tc Rep: Chromosome chr1 scaffold_46, whole genome shotgun sequence - Vitis vin     | 42.47    | 1 |
| gb KG9B.001N12F.050628T7 KG9B Nicotiana tabacum cDNA clone KG9B.001N12, n          | 72.89    | 1 |
| gb KP1B.102C05F.050722T7 KP1B Nicotiana tabacum cDNA clone KP1B.102C05, ml         | 551.44   | 1 |
| tc Rep: Chromosome chr6 scaffold_15, whole genome shotgun sequence - Vitis vin     | 21472.25 | 1 |
| gb KL5B.105P16F.060207T7 KL5B Nicotiana tabacum cDNA clone KL5B.105P16, mR         | 22.81    | 1 |
| gb Nicotiana tabacum Avr9 [AY220480]                                               | 1160.34  | 1 |
| Unknown                                                                            | 247.83   | 1 |
| gb KF8B.200C05F.060120T7 KF8 Nicotiana tabacum cDNA clone KF8B.200C05, mRN         | 34.86    | 1 |
| gb KG9B.002I22F.050720T7 KG9B Nicotiana tabacum cDNA clone KG9B.002I22, mR         | 131.42   | 1 |
| gb TT-48_K20 Burley21 trichome library Nicotiana tabacum cDNA, mRNA sequence       | 35.18    | 1 |
| Unknown                                                                            | 38.09    | 1 |
| tc Rep: Chromosome chr19 scaffold_66, whole genome shotgun sequence - Vitis vi     | 115.07   | 1 |
| Unknown                                                                            | 36.3     | 1 |
| gb CHO_SL016xl02f1.ab1 CHO_SL Nicotiana tabacum cDNA, mRNA sequence [EH62          | 564.84   | 1 |

|                                                                                         |          |   |
|-----------------------------------------------------------------------------------------|----------|---|
| Unknown                                                                                 | 22.54    | 1 |
| tc Rep: Chromosome chr8 scaffold_106, whole genome shotgun sequence - Vitis vi          | 32.3     | 1 |
| gb KF8B.201C21F.060124T7 KF8 Nicotiana tabacum cDNA clone KF8B.201C21, mRN              | 2837.54  | 1 |
| gb KG9B.001K05F.050628T7 KG9B Nicotiana tabacum cDNA clone KG9B.001K05, m               | 104.59   | 1 |
| tc Rep: Chromosome chr11 scaffold_14, whole genome shotgun sequence - Vitis vi          | 479.25   | 1 |
| tc Rep: Chromosome chr3 scaffold_95, whole genome shotgun sequence - Vitis vin          | 133.99   | 1 |
| Unknown                                                                                 | 37.07    | 1 |
| tc Rep: Chromosome chr5 scaffold_2, whole genome shotgun sequence - Vitis vinif         | 365.7    | 1 |
| gb TT-15_B05 Samsun trichome library Nicotiana tabacum cDNA, mRNA sequence              | 105.51   | 1 |
| gb KL4B.108C04F.051105T7 KL4B Nicotiana tabacum cDNA clone KL4B.108C04, mR              | 27.64    | 1 |
| gb KG9B.002B17F.050720T7 KG9B Nicotiana tabacum cDNA clone KG9B.002B17, r               | 139.22   | 1 |
| tc Rep: DNA-binding protein - Nicotiana tomentosiformis (Tobacco), partial (84%) [      | 92.89    | 1 |
| tc Rep: Chromosome chr1 scaffold_5, whole genome shotgun sequence - Vitis vinif         | 1626.86  | 1 |
| tc Rep: Striated muscle activator-like protein - Oryza sativa subsp. japonica (Rice), r | 1195.8   | 1 |
| tc Rep: Profilin - Solanum lycopersicum (Tomato) (Lycopersicon esculentum), comp        | 99.13    | 1 |
| gb BP131006 MAT001 Nicotiana tabacum cDNA clone BY3027, mRNA sequence [Bf               | 107.5    | 1 |
| gb KF8C.101G19F.051214T7 KF8 Nicotiana tabacum cDNA clone KF8C.101G19, mRl              | 36.75    | 1 |
| Unknown                                                                                 | 2713.34  | 1 |
| Unknown                                                                                 | 147.18   | 1 |
| gb KN6B.102M01F.051230T7 KN6B Nicotiana tabacum cDNA clone KN6B.102M01,                 | 34893.35 | 1 |
| tc Rep: Genomic DNA, chromosome 3, P1 clone: MXO21 - Arabidopsis thaliana (Mc           | 19.35    | 1 |
| gb KF8C.108E23F.051215T7 KF8 Nicotiana tabacum cDNA clone KF8C.108E23, mRN              | 11246.45 | 1 |
| gb AGN_PNL216cf1_d9.trimmed.seq AGN_PNL Nicotiana tabacum cDNA 5', mRNA                 | 110.14   | 1 |
| gb KF8C.101K12F.051214T7 KF8 Nicotiana tabacum cDNA clone KF8C.101K12, mRN              | 18375.5  | 1 |
| tc Rep: Erwinia induced protein 2 - Solanum tuberosum (Potato), complete [TC532-        | 100.96   | 1 |
| gb BP535201 MAT005 Nicotiana tabacum cDNA clone BY35035, mRNA sequence [E               | 450.95   | 1 |
| gb KT7C.110I19F.051221T7 KT7 Nicotiana tabacum cDNA clone KT7C.110I19, mRN/             | 206.11   | 1 |
| gb KT7C.108G08F.051219T7 KT7 Nicotiana tabacum cDNA clone KT7C.108G08, mR               | 1809.09  | 1 |
| Unknown                                                                                 | 37.16    | 1 |
| gb AGN_RNC126xb13r1.ab1 AGN_RNC Nicotiana tabacum cDNA 3', mRNA sequenc                 | 125.57   | 1 |
| tc Rep: Ribosomal protein L3A - Nicotiana tabacum (Common tobacco), complete [          | 72.02    | 1 |
| Unknown                                                                                 | 3322.88  | 1 |
| Unknown                                                                                 | 14685.65 | 1 |
| tc Rep: Chromosome undetermined scaffold_267, whole genome shotgun sequenc              | 168.94   | 1 |

|                                                                                    |          |   |
|------------------------------------------------------------------------------------|----------|---|
| Unknown                                                                            | 24.89    | 1 |
| Unknown                                                                            | 17.64    | 1 |
| tc Rep: Chromosome undetermined scaffold_69, whole genome shotgun sequence         | 10606.75 | 1 |
| tc Rep: Single-stranded nucleic acid binding R3H - Medicago truncatula (Barrel med | 4373.44  | 1 |
| Unknown                                                                            | 122.64   | 1 |
| Unknown                                                                            | 19.6     | 1 |
| Unknown                                                                            | 93.16    | 1 |
| Unknown                                                                            | 62.97    | 1 |
| Unknown                                                                            | 1662.08  | 1 |
| tc Rep: Polyubiquitin - Pinus sylvestris (Scots pine), partial (60%) [TC51659]     | 687.97   | 1 |
| Unknown                                                                            | 56.49    | 1 |
| gb CHO_SL015xp08f2.ab1 CHO_SL Nicotiana tabacum cDNA, mRNA sequence [EH6           | 70.06    | 1 |
| Unknown                                                                            | 143.26   | 1 |
| Unknown                                                                            | 474.84   | 1 |
| Unknown                                                                            | 1193.32  | 1 |
| tc Rep: Adenylyl-sulfate reductase precursor - Solanum lycopersicum (Tomato) (Lyc  | 1180.19  | 1 |
| tc Rep: Chromosome chr5 scaffold_156, whole genome shotgun sequence - Vitis vi     | 509.16   | 1 |
| Unknown                                                                            | 263.72   | 1 |
| gb KL4B.105E12F.051104T7 KL4B Nicotiana tabacum cDNA clone KL4B.105E12, mR         | 32.85    | 1 |
| tc Rep: Polypeptide with reverse transcriptase and RNaseH domains - Petunia hyb    | 138.79   | 1 |
| tc Rep: En/Spm-like transposon protein - Arabidopsis thaliana (Mouse-ear cress), p | 203.17   | 1 |
| tc GB AB053091.1 BAB40702.1 kinesin-like polypeptides 3 [Nicotiana tabacum] [N     | 41.24    | 1 |
| tc Rep: Chromosome chr16 scaffold_189, whole genome shotgun sequence - Vitis v     | 188.62   | 1 |
| tc Rep: Chromosome chr7 scaffold_42, whole genome shotgun sequence - Vitis vin     | 125.59   | 1 |
| gb AGN_PNL203ar1_g7.trimmed.seq AGN_PNL Nicotiana tabacum cDNA 3', mRNA            | 32.25    | 1 |
| tc Rep: Chromosome chr8 scaffold_23, whole genome shotgun sequence - Vitis vin     | 600.91   | 1 |
| tc Rep: Chromosome undetermined scaffold_838, whole genome shotgun sequenc         | 95.48    | 1 |
| tc Rep: Oxidoreductase - Setaria italica (Foxtail millet), partial (84%) [TC57787] | 57.99    | 1 |
| tc Rep: Chromosome chr3 scaffold_8, whole genome shotgun sequence - Vitis vinif    | 26.26    | 1 |
| Unknown                                                                            | 2432.89  | 1 |
| tc Rep: Fiber protein Fb15 - Gossypium barbadense (Sea-island cotton) (Egyptian cc | 2901.13  | 1 |
| tc Rep: Ubiquitin carrier protein - Solanum tuberosum (Potato), complete [TC4631(  | 193.29   | 1 |
| gb AGN_RNC116xe09f1.ab1 AGN_RNC Nicotiana tabacum cDNA 5', mRNA sequenc            | 796.23   | 1 |
| Unknown                                                                            | 2143.92  | 1 |

|                                                                                   |          |   |
|-----------------------------------------------------------------------------------|----------|---|
| gb KR3B.112O22F.060119T7 KR3B Nicotiana tabacum cDNA clone KR3B.112O22, m         | 1069.24  | 1 |
| tc Rep: Ribosomal protein L3A - Nicotiana tabacum (Common tobacco), partial (52   | 71.8     | 1 |
| gb TT-31_F22 K326 trichome library Nicotiana tabacum cDNA, mRNA sequence [FG      | 23.89    | 1 |
| gb KL5B.001A13F.050901T7 KL5B Nicotiana tabacum cDNA clone KL5B.001A13, mF        | 765.47   | 1 |
| Unknown                                                                           | 22.04    | 1 |
| tc Rep: Chromosome chr3 scaffold_157, whole genome shotgun sequence - Vitis vi    | 49.64    | 1 |
| tc Rep: Chromosome chr4 scaffold_208, whole genome shotgun sequence - Vitis vi    | 56.68    | 1 |
| gb KG9B.103M20F.051128T7 KG9B Nicotiana tabacum cDNA clone KG9B.103M20,           | 517.66   | 1 |
| tc Rep: Chromosome chr7 scaffold_42, whole genome shotgun sequence - Vitis vin    | 101.75   | 1 |
| gb KF8C.105M06F.051215T7 KF8 Nicotiana tabacum cDNA clone KF8C.105M06, mF         | 939.33   | 1 |
| gb AM784351 seedling library, SL Nicotiana tabacum cDNA clone nt002295065, mF     | 59.24    | 1 |
| gb KR2B.112K16F.051230T7 KR2B Nicotiana tabacum cDNA clone KR2B.112K16, mi        | 18.64    | 1 |
| Unknown                                                                           | 68.17    | 1 |
| Unknown                                                                           | 29       | 1 |
| tc Rep: Protein transport protein SEC61 subunit gamma - Oryza sativa subsp. japon | 1885.39  | 1 |
| tc Rep: Chromosome chr14 scaffold_21, whole genome shotgun sequence - Vitis vi    | 438.6    | 1 |
| gb KF8B.200O10F.060128T7 KF8 Nicotiana tabacum cDNA clone KF8B.200O10, mRl        | 120.95   | 1 |
| Unknown                                                                           | 969.86   | 1 |
| Unknown                                                                           | 630.52   | 1 |
| gb AGN_RPC023xp04f1.ab1 AGN_RPC Nicotiana tabacum cDNA 5', mRNA sequenc           | 31.87    | 1 |
| Unknown                                                                           | 311.48   | 1 |
| gb KN6B.100L06F.051019T7 KN6B Nicotiana tabacum cDNA clone KN6B.100L06, m         | 231.77   | 1 |
| Unknown                                                                           | 41.49    | 1 |
| gb AGN_PNL212cf1_d9.trimmed.seq AGN_PNL Nicotiana tabacum cDNA 5', mRNA           | 40.89    | 1 |
| gb KF8C.110P24F.051216T7 KF8 Nicotiana tabacum cDNA clone KF8C.110P24, mRN        | 1269.91  | 1 |
| Unknown                                                                           | 1018.46  | 1 |
| gb KL4B.108K12F.051105T7 KL4B Nicotiana tabacum cDNA clone KL4B.108K12, mR        | 274.6    | 1 |
| Unknown                                                                           | 38.49    | 1 |
| tc Rep: Small GTP-binding protein - Capsicum annuum (Bell pepper), complete [TC5  | 10847.75 | 1 |
| gb BP130610 MAT001 Nicotiana tabacum cDNA clone BY2594, mRNA sequence [BF         | 18.97    | 1 |
| tc Rep: Adenylyl-sulfate reductase precursor - Solanum lycopersicum (Tomato) (Lyc | 5751.9   | 1 |
| Unknown                                                                           | 16.61    | 1 |
| tc Rep: Chromosome chr19 scaffold_4, whole genome shotgun sequence - Vitis vin    | 2779.83  | 1 |
| gb Nicotiana tabacum obtusifoliol-14-demethylase (CYP51) mRNA, complete cds [A    | 61.29    | 1 |

|                                                                                      |         |   |
|--------------------------------------------------------------------------------------|---------|---|
| tc Rep: Ribulose biphosphate carboxylase large chain precursor - Nicotiana sylvest   | 594.4   | 1 |
| Unknown                                                                              | 52.54   | 1 |
| gb KF8C.106M16F.051215T7 KF8 Nicotiana tabacum cDNA clone KF8C.106M16, mF            | 36.33   | 1 |
| gb AGN_PNL229br1_f3.trimmed.seq AGN_PNL Nicotiana tabacum cDNA 3', mRNA              | 25.63   | 1 |
| tc Rep: Chromosome chr8 scaffold_34, whole genome shotgun sequence - Vitis vin       | 462.53  | 1 |
| Unknown                                                                              | 62.07   | 1 |
| Unknown                                                                              | 29.15   | 1 |
| gb AGN_RNC024xa10f1.ab1 AGN_RNC Nicotiana tabacum cDNA 5', mRNA sequenc              | 57.05   | 1 |
| gb KR2B.110N10F.051229T7 KR2B Nicotiana tabacum cDNA clone KR2B.110N10, m            | 9294.71 | 1 |
| gb Nicotiana tabacum Wisconsin 38 vitronectin-like adhesion protein mRNA, comp       | 1089.42 | 1 |
| tc Rep: Chromosome chr15 scaffold_19, whole genome shotgun sequence - Vitis vi       | 331.94  | 1 |
| tc Rep: Chromosome chr11 scaffold_13, whole genome shotgun sequence - Vitis vi       | 31.78   | 1 |
| Unknown                                                                              | 22.28   | 1 |
| gb FS403828 normalized full-length tobacco cDNA library Nicotiana tabacum cDNA       | 2858.53 | 1 |
| gb KT7B.107N02F.060124T7 KT7 Nicotiana tabacum cDNA clone KT7B.107N02, mR            | 32.03   | 1 |
| gb KR3B.106M07F.051109T7 KR3B Nicotiana tabacum cDNA clone KR3B.106M07, r            | 194.24  | 1 |
| tc Rep: Chromosome chr6 scaffold_3, whole genome shotgun sequence - Vitis vinif      | 565.58  | 1 |
| tc Rep: Serine/threonine protein phosphatase - Vitis vinifera (Grape), partial (47%) | 792.22  | 1 |
| Unknown                                                                              | 88.67   | 1 |
| gb TT-27_K03 K326 trichome library Nicotiana tabacum cDNA, mRNA sequence [FG         | 111.24  | 1 |
| gb KP1B.102J11F.050722T7 KP1B Nicotiana tabacum cDNA clone KP1B.102J11, mR           | 79.02   | 1 |
| Unknown                                                                              | 389.97  | 1 |
| Unknown                                                                              | 377.8   | 1 |
| tc Rep: Chromosome chr6 scaffold_15, whole genome shotgun sequence - Vitis vin       | 2366.56 | 1 |
| gb 10G12 Transformed tobacco Lambda Zap II library Nicotiana tabacum cDNA 5', r      | 181.21  | 1 |
| Unknown                                                                              | 24.85   | 1 |
| Unknown                                                                              | 55.16   | 1 |
| tc Rep: Similarity to EH domain containing proteins - Arabidopsis thaliana (Mouse-ε  | 556.02  | 1 |
| gb KR2B.101K12F.060128T7 KR2B Nicotiana tabacum cDNA clone KR2B.101K12, mI           | 228.9   | 1 |
| gb Nicotiana tabacum cDNA-AFLP-fragment BSTC11-1-240, cultivar Bright Yellow 2       | 29.22   | 1 |
| tc Rep: Chromosome undetermined scaffold_55, whole genome shotgun sequence           | 905.9   | 1 |
| gb KN6B.102K01F.051230T7 KN6B Nicotiana tabacum cDNA clone KN6B.102K01, r            | 299.07  | 1 |
| tc Rep: Chromosome chr1 scaffold_136, whole genome shotgun sequence - Vitis vi       | 21.26   | 1 |
| tc Rep: Chromosome chr7 scaffold_42, whole genome shotgun sequence - Vitis vin       | 175.81  | 1 |

|                                                                                     |         |   |
|-------------------------------------------------------------------------------------|---------|---|
| Unknown                                                                             | 98.65   | 1 |
| gb TL13.110O19F.060320T7 TL13 Nicotiana tabacum cDNA clone TL13.110O19, mR          | 504.73  | 1 |
| Unknown                                                                             | 129.44  | 1 |
| Unknown                                                                             | 1032.57 | 1 |
| Unknown                                                                             | 887.95  | 1 |
| tc Rep: Chromosome chr10 scaffold_50, whole genome shotgun sequence - Vitis vi      | 84.65   | 1 |
| gb KL5B.106L07F.060215T7 KL5B Nicotiana tabacum cDNA clone KL5B.106L07, mRl         | 56.41   | 1 |
| Unknown                                                                             | 3017.19 | 1 |
| gb TT-49_J11 K326 late senescent leaf library Nicotiana tabacum cDNA, mRNA seq      | 468.8   | 1 |
| Unknown                                                                             | 36.26   | 1 |
| gb KL4B.105A02F.051104T7 KL4B Nicotiana tabacum cDNA clone KL4B.105A02, mF          | 36.02   | 1 |
| tc Rep: Constitutive plastid-lipid associated protein - Solanum lycopersicum (Tomat | 68.37   | 1 |
| Unknown                                                                             | 124.68  | 1 |
| tc Rep: Chromosome chr5 scaffold_58, whole genome shotgun sequence - Vitis vin      | 243     | 1 |
| Unknown                                                                             | 1009.08 | 1 |
| gb TT-12_I21 tobacco leaf library Nicotiana tabacum cDNA, mRNA sequence [FG63       | 171.82  | 1 |
| gb AGN_RNC018xi14f1.ab1 AGN_RNC Nicotiana tabacum cDNA 5', mRNA sequence            | 139.99  | 1 |
| Unknown                                                                             | 76.29   | 1 |
| gb TT-07_G04 K326 trichome library Nicotiana tabacum cDNA, mRNA sequence [FC        | 17.45   | 1 |
| gb KG9B.107C11F.060120T7 KG9B Nicotiana tabacum cDNA clone KG9B.107C11, mR          | 751.64  | 1 |
| gb FS401498 normalized full-length tobacco cDNA library Nicotiana tabacum cDNA      | 93.12   | 1 |
| gb Nicotiana tabacum mRNA for protoporphyrin IX oxidase, ppxII gene [Y13466]        | 80.95   | 1 |
| Unknown                                                                             | 88.34   | 1 |
| Unknown                                                                             | 39.01   | 1 |
| tc Rep: Chromosome chr2 scaffold_112, whole genome shotgun sequence - Vitis vi      | 4740.5  | 1 |
| tc Rep: Mu opioid receptor mMOR-1R1 - Mus musculus (Mouse), partial (6%) [TC65      | 30.46   | 1 |
| Unknown                                                                             | 40.17   | 1 |
| Unknown                                                                             | 94.34   | 1 |
| gb AGN_ELP005xf15f1.ab1 AGN_ELP Nicotiana tabacum cDNA 5', mRNA sequence            | 56.73   | 1 |
| gb KL4B.103I05F.051103T7 KL4B Nicotiana tabacum cDNA clone KL4B.103I05, mRN         | 57.21   | 1 |
| tc Rep: Thaliana 60S ribosomal protein L7 - Solanum tuberosum (Potato), complete    | 28.28   | 1 |
| Unknown                                                                             | 99.36   | 1 |
| gb TT-27_O16 K326 late senescent leaf library Nicotiana tabacum cDNA, mRNA seq      | 76.86   | 1 |
| Unknown                                                                             | 994.9   | 1 |

|                                                                                      |         |   |
|--------------------------------------------------------------------------------------|---------|---|
| tc Rep: Chromosome chr17 scaffold_16, whole genome shotgun sequence - Vitis vi       | 138.73  | 1 |
| Unknown                                                                              | 29.12   | 1 |
| tc Rep: Mitochondrial processing peptidase-like - Solanum tuberosum (Potato), par    | 100.75  | 1 |
| tc Rep: Autophagy-related protein 3 - Vitis vinifera (Grape), complete [TC47245]     | 53.4    | 1 |
| gb AGN_RNC121xf18f1.ab1 AGN_RNC Nicotiana tabacum cDNA 5', mRNA sequenc              | 390.71  | 1 |
| gb KG9B.106J17F.051129T7 KG9B Nicotiana tabacum cDNA clone KG9B.106J17, mf           | 5741.26 | 1 |
| Unknown                                                                              | 26.69   | 1 |
| tc Rep: Pyridoxine biosynthesis protein - Glycine max (Soybean), partial (98%) [TC4  | 1502.31 | 1 |
| Unknown                                                                              | 120.73  | 1 |
| gb TT-21_B07 Burley21 trichome library Nicotiana tabacum cDNA, mRNA sequence         | 411.93  | 1 |
| gb Nicotiana tabacum chaperone GrpE type 1 (GrpE1) mRNA, nuclear gene encodir        | 84.41   | 1 |
| tc Rep: Heat shock protein 90 - Nicotiana tabacum (Common tobacco), partial (29%     | 533.66  | 1 |
| tc Rep: Chromosome chr17 scaffold_12, whole genome shotgun sequence - Vitis vi       | 18.96   | 1 |
| Unknown                                                                              | 190.36  | 1 |
| Unknown                                                                              | 59.82   | 1 |
| tc Rep: Avr9/Cf-9 rapidly elicited protein 31 - Nicotiana tabacum (Common tobaccc    | 22      | 1 |
| tc Rep: Endosomal protein-like - Arabidopsis thaliana (Mouse-ear cress), partial (33 | 849.58  | 1 |
| tc Rep: Chromosome undetermined scaffold_87, whole genome shotgun sequence           | 539.16  | 1 |
| tc Rep: Protein kinase - Medicago truncatula (Barrel medic), partial (37%) [TC58053  | 2204.86 | 1 |
| gb KR2B.104A09F.051227T7 KR2B Nicotiana tabacum cDNA clone KR2B.104A09, m            | 51.79   | 1 |
| tc Rep: Chromosome chr18 scaffold_59, whole genome shotgun sequence - Vitis vi       | 26.44   | 1 |
| Unknown                                                                              | 1118.08 | 1 |
| tc Rep: Chromosome chr18 scaffold_59, whole genome shotgun sequence - Vitis vi       | 83.04   | 1 |
| tc Rep: Ribosomal protein L3A - Nicotiana tabacum (Common tobacco), complete [       | 40.05   | 1 |
| gb KN6B.101D07F.051230T7 KN6B Nicotiana tabacum cDNA clone KN6B.101D07, n            | 33.77   | 1 |
| gb TT-20_G03 Samsun trichome library Nicotiana tabacum cDNA, mRNA sequence           | 942.5   | 1 |
| tc Rep: Chromosome chr10 scaffold_204, whole genome shotgun sequence - Vitis v       | 36.49   | 1 |
| tc Rep: Chromosome chr18 scaffold_1, whole genome shotgun sequence - Vitis vin       | 92.2    | 1 |
| gb BP129613 MAT001 Nicotiana tabacum cDNA clone BY1485, mRNA sequence [BF            | 23.18   | 1 |
| tc Rep: Chromosome chr14 scaffold_27, whole genome shotgun sequence - Vitis vi       | 895.83  | 1 |
| gb BP134806 MAT001 Nicotiana tabacum cDNA clone BY7249, mRNA sequence [BF            | 23.02   | 1 |
| gb FS416927 normalized full-length tobacco cDNA library Nicotiana tabacum cDNA       | 514.33  | 1 |
| Unknown                                                                              | 90.26   | 1 |
| gb TT-23_E16 K326 trichome library Nicotiana tabacum cDNA, mRNA sequence [FG         | 844.58  | 1 |

|                                                                                      |         |   |
|--------------------------------------------------------------------------------------|---------|---|
| tc Rep: NB-ARC domain containing protein - Solanum tuberosum (Potato), partial (i    | 80.3    | 1 |
| gb KT7B.100O10F.051010T7 KT7 Nicotiana tabacum cDNA clone KT7B.100O10, mR            | 960.62  | 1 |
| tc Rep: Chromosome undetermined scaffold_60, whole genome shotgun sequence           | 471.53  | 1 |
| gb TT-47_A04 Samsun trichome library Nicotiana tabacum cDNA, mRNA sequence           | 41.84   | 1 |
| gb KT7C.102L01F.051216T7 KT7 Nicotiana tabacum cDNA clone KT7C.102L01, mRN           | 63.67   | 1 |
| gb AGN_RNC014xf18r1.ab1 AGN_RNC Nicotiana tabacum cDNA 3', mRNA sequenc              | 18.36   | 1 |
| Unknown                                                                              | 17175.1 | 1 |
| tc Rep: Chromosome undetermined scaffold_611, whole genome shotgun sequenc           | 35.63   | 1 |
| gb KF8C.101E06F.051214T7 KF8 Nicotiana tabacum cDNA clone KF8C.101E06, mRN           | 32138   | 1 |
| Unknown                                                                              | 244.93  | 1 |
| gb Nicotiana tabacum basic helix-loop-helix protein mRNA, complete cds [EU88027      | 3142.46 | 1 |
| gb AGN_RNC022xp13f1.ab1 AGN_RNC Nicotiana tabacum cDNA 5', mRNA sequenc              | 55.78   | 1 |
| tc Rep: Chromosome chr5 scaffold_64, whole genome shotgun sequence - Vitis vin       | 800.28  | 1 |
| Unknown                                                                              | 20.64   | 1 |
| tc Rep: Chromosome chr17 scaffold_16, whole genome shotgun sequence - Vitis vi       | 627.4   | 1 |
| gb KP1B.105P02F.060116T7 KP1B Nicotiana tabacum cDNA clone KP1B.105P02, mI           | 184.31  | 1 |
| Unknown                                                                              | 43.66   | 1 |
| gb Nicotiana tabacum partial mRNA for chloroplast FtsZ-like protein (ftsZ gene), clc | 244.75  | 1 |
| gb BP135430 MAT001 Nicotiana tabacum cDNA clone BY7940, mRNA sequence [Bf            | 19.89   | 1 |
| Unknown                                                                              | 48.21   | 1 |
| gb AGN_RPC015xe14f1.ab1 AGN_RPC Nicotiana tabacum cDNA 5', mRNA sequenc              | 65.78   | 1 |
| gb KN6B.102C03F.051230T7 KN6B Nicotiana tabacum cDNA clone KN6B.102C03, n            | 235.42  | 1 |
| tc Rep: Branched-chain amino acid ABC transporter, ATP-binding protein - Roseova     | 754.59  | 1 |
| gb Nicotiana tabacum cDNA-AFLP-fragment BSTT32-4-220, cultivar Bright Yellow 2       | 35.58   | 1 |
| gb KP1B.105H02F.060116T7 KP1B Nicotiana tabacum cDNA clone KP1B.105H02, m            | 685.24  | 1 |
| Unknown                                                                              | 177.51  | 1 |
| gb KG9B.101D07F.060120T7 KG9B Nicotiana tabacum cDNA clone KG9B.101D07, n            | 72.67   | 1 |
| Unknown                                                                              | 19.44   | 1 |
| gb KG9B.002I22F.050720T7 KG9B Nicotiana tabacum cDNA clone KG9B.002I22, mR           | 31.28   | 1 |
| gb KG9B.005G05F.050721T7 KG9B Nicotiana tabacum cDNA clone KG9B.005G05, n            | 24.59   | 1 |
| Unknown                                                                              | 2039.51 | 1 |
| tc Rep: Chromosome chr2 scaffold_11, whole genome shotgun sequence - Vitis vin       | 755.78  | 1 |
| tc Rep: Chromosome chr18 scaffold_1, whole genome shotgun sequence - Vitis vin       | 755.46  | 1 |
| tc Rep: Chromosome chr17 scaffold_12, whole genome shotgun sequence - Vitis vi       | 63.85   | 1 |



|                                                                                          |          |   |
|------------------------------------------------------------------------------------------|----------|---|
| gb AGN_RPC012xh11f1.ab1 AGN_RPC Nicotiana tabacum cDNA 5', mRNA sequence                 | 62.63    | 1 |
| gb KR2B.108O20F.051229T7 KR2B Nicotiana tabacum cDNA clone KR2B.108O20, mRNA sequence    | 348.62   | 1 |
| tc Rep: Chromosome chr14 scaffold_21, whole genome shotgun sequence - Vitis vinifera     | 19.49    | 1 |
| Unknown                                                                                  | 522.21   | 1 |
| gb KP1B.105O03F.060116T7 KP1B Nicotiana tabacum cDNA clone KP1B.105O03, mRNA sequence    | 95.89    | 1 |
| Unknown                                                                                  | 43.5     | 1 |
| gb KN6B.009I22F.050901T7 KN6B Nicotiana tabacum cDNA clone KN6B.009I22, mRNA sequence    | 19015.1  | 1 |
| gb TT-04_E07 K326 trichome library Nicotiana tabacum cDNA, mRNA sequence [FG]            | 202.19   | 1 |
| gb KP1B.037L23F.050628T7 KP1B Nicotiana tabacum cDNA clone KP1B.037L23, mRNA sequence    | 579.06   | 1 |
| tc Rep: S-adenosylmethionine synthetase 3 - Solanum lycopersicum (Tomato) (Lycopersicon) | 20232.85 | 1 |
| gb KN6B.101L09F.051230T7 KN6B Nicotiana tabacum cDNA clone KN6B.101L09, mRNA sequence    | 168.36   | 1 |
| gb tbt_002261 Normalized Nicotiana tabacum cDNA library Nicotiana tabacum cDNA           | 644.37   | 1 |
| gb KG9B.102P01F.051126T7 KG9B Nicotiana tabacum cDNA clone KG9B.102P01, mRNA sequence    | 187.51   | 1 |
| tc Rep: Chromosome chr18 scaffold_1, whole genome shotgun sequence - Vitis vinifera      | 209.31   | 1 |
| Unknown                                                                                  | 22.06    | 1 |
| Unknown                                                                                  | 482.75   | 1 |
| gb KF8B.202F14F.060124T7 KF8 Nicotiana tabacum cDNA clone KF8B.202F14, mRNA sequence     | 49925.7  | 1 |
| Unknown                                                                                  | 26.3     | 1 |
| gb HAP5-7 Cultured tobacco cells Nicotiana tabacum cDNA 3' similar to Virus resist       | 23.72    | 1 |
| Unknown                                                                                  | 28.02    | 1 |
| gb KT7B.107A21F.060124T7 KT7 Nicotiana tabacum cDNA clone KT7B.107A21, mRNA sequence     | 68.38    | 1 |
| tc Rep: Ubiquitin carrier protein - Solanum tuberosum (Potato), complete [TC4404]        | 263.05   | 1 |
| Unknown                                                                                  | 175.38   | 1 |
| gb N.tabacum mRNA for caffeoyl-CoA O-methyltransferase [Z56282]                          | 493.04   | 1 |
| gb KT7C.110P04F.051221T7 KT7 Nicotiana tabacum cDNA clone KT7C.110P04, mRNA sequence     | 58.47    | 1 |
| tc Rep: Chromosome chr1 scaffold_5, whole genome shotgun sequence - Vitis vinifera       | 182.82   | 1 |
| gb KL4B.104J20F.051104T7 KL4B Nicotiana tabacum cDNA clone KL4B.104J20, mRNA sequence    | 92.15    | 1 |
| tc Rep: Chromosome undetermined scaffold_163, whole genome shotgun sequence              | 56.95    | 1 |
| gb KF8C.101K08F.051214T7 KF8 Nicotiana tabacum cDNA clone KF8C.101K08, mRNA sequence     | 210.52   | 1 |
| gb AGN_ELP026xk21f1.ab1 AGN_ELP Nicotiana tabacum cDNA 5', mRNA sequence                 | 382.84   | 1 |
| Unknown                                                                                  | 86.67    | 1 |
| tc Rep: Chromosome chr5 scaffold_2, whole genome shotgun sequence - Vitis vinifera       | 108.98   | 1 |
| tc Rep: NtEIG-E80 protein - Nicotiana tabacum (Common tobacco), partial (62%) [T]        | 306.15   | 1 |
| Unknown                                                                                  | 360.19   | 1 |

|                                                                                           |          |   |
|-------------------------------------------------------------------------------------------|----------|---|
| gb KL4B.106D01F.051125T7 KL4B Nicotiana tabacum cDNA clone KL4B.106D01, mF                | 183.82   | 1 |
| Unknown                                                                                   | 2171.2   | 1 |
| Unknown                                                                                   | 1253.25  | 1 |
| gb Nicotiana tabacum arcA mRNA for G protein beta subunit-like protein, complete          | 32.65    | 1 |
| tc Rep: Chromosome undetermined scaffold_77, whole genome shotgun sequence                | 97.94    | 1 |
| tc Rep: Ubiquitin carrier protein - Nicotiana tabacum (Common tobacco), complete          | 152.34   | 1 |
| Unknown                                                                                   | 550.9    | 1 |
| tc Rep: Vacuolar protein sorting-associated protein 26-like protein - Solanum tuber       | 267.61   | 1 |
| Unknown                                                                                   | 624.25   | 1 |
| gb TT-11_F16 K326 early senescent leaf library Nicotiana tabacum cDNA, mRNA sequence      | 2318.11  | 1 |
| Unknown                                                                                   | 22.4     | 1 |
| gb AGN_ELP008xf19f1.ab1 AGN_ELP Nicotiana tabacum cDNA 5', mRNA sequence                  | 31.92    | 1 |
| Unknown                                                                                   | 31.81    | 1 |
| gb KP1B.107H16F.050726T7 KP1B Nicotiana tabacum cDNA clone KP1B.107H16, m                 | 1573.11  | 1 |
| gb KN6B.105P08F.060104T7 KN6B Nicotiana tabacum cDNA clone KN6B.105P08, m                 | 1531.17  | 1 |
| gb KR3B.110I21F.051111T7 KR3B Nicotiana tabacum cDNA clone KR3B.110I21, mR                | 18.56    | 1 |
| tc Rep: Cullin 1-like protein C - Petunia integrifolia subsp. inflata, partial (18%) [TC5 | 108.53   | 1 |
| tc Rep: Plastid glucose-6-phosphate/phosphate translocator - Helianthus annuus (C         | 40.94    | 1 |
| gb TT-29_G11 K326 trichome library Nicotiana tabacum cDNA, mRNA sequence [FC              | 530.66   | 1 |
| tc Rep: Chromosome chr18 scaffold_59, whole genome shotgun sequence - Vitis vi            | 32.58    | 1 |
| Unknown                                                                                   | 983.01   | 1 |
| gb TT-06_M10 Samsun trichome library Nicotiana tabacum cDNA, mRNA sequence                | 542.11   | 1 |
| gb KL4B.104H17F.051104T7 KL4B Nicotiana tabacum cDNA clone KL4B.104H17, mF                | 486.24   | 1 |
| gb KP1B.001N14F.050628T7 KP1B Nicotiana tabacum cDNA clone KP1B.001N14, m                 | 244.64   | 1 |
| gb AGN_RNC121xg06f1.ab1 AGN_RNC Nicotiana tabacum cDNA 5', mRNA sequenc                   | 18.86    | 1 |
| tc Rep: Chromosome chr3 scaffold_8, whole genome shotgun sequence - Vitis vinif           | 603.27   | 1 |
| Unknown                                                                                   | 11128.85 | 1 |
| Unknown                                                                                   | 107.85   | 1 |
| Unknown                                                                                   | 31.28    | 1 |
| gb CHO_SL003xc11f1.ab1 CHO_SL Nicotiana tabacum cDNA, mRNA sequence [EH6:                 | 23.9     | 1 |
| Unknown                                                                                   | 42.57    | 1 |
| gb AGN_PNL218cf1_g10.trimmed.seq AGN_PNL Nicotiana tabacum cDNA 5', mRN/                  | 24.1     | 1 |
| Unknown                                                                                   | 22.18    | 1 |
| Unknown                                                                                   | 30.3     | 1 |

|                                                                                   |          |   |
|-----------------------------------------------------------------------------------|----------|---|
| Unknown                                                                           | 481.73   | 1 |
| Unknown                                                                           | 70.83    | 1 |
| tc Rep: Chromosome undetermined scaffold_80, whole genome shotgun sequence        | 245.4    | 1 |
| tc Rep: Chromosome chr12 scaffold_36, whole genome shotgun sequence - Vitis vi    | 505.07   | 1 |
| gb KP1B.104D17F.050725T7 KP1B Nicotiana tabacum cDNA clone KP1B.104D17, m         | 600.44   | 1 |
| gb CHO_SL001xm09f1.ab1 CHO_SL Nicotiana tabacum cDNA, mRNA sequence [EHf          | 135.03   | 1 |
| gb TT-38_O14 Samsun trichome library Nicotiana tabacum cDNA, mRNA sequence        | 211.29   | 1 |
| gb AGN_RPC019xj22f1.ab1 AGN_RPC Nicotiana tabacum cDNA 5', mRNA sequence          | 62.87    | 1 |
| tc Rep: NtSar1 protein - Nicotiana tabacum (Common tobacco), complete [TC4108:    | 2558.27  | 1 |
| gb KL4B.102P15F.051125T7 KL4B Nicotiana tabacum cDNA clone KL4B.102P15, mR        | 31.86    | 1 |
| gb KR2B.104G24F.051227T7 KR2B Nicotiana tabacum cDNA clone KR2B.104G24, m         | 412.26   | 1 |
| tc Rep: Transformer-SR ribonucleoprotein - Nicotiana tabacum (Common tobacco),    | 1014.39  | 1 |
| Unknown                                                                           | 36.65    | 1 |
| Unknown                                                                           | 256.83   | 1 |
| gb Nicotiana tabacum mRNA for phragmoplastin, dynamin-like protein [AJ244024]     | 2178.99  | 1 |
| gb AGN_RNC127xa14f1.ab1 AGN_RNC Nicotiana tabacum cDNA 5', mRNA sequenc           | 28.89    | 1 |
| gb KG9B.005P12F.050721T7 KG9B Nicotiana tabacum cDNA clone KG9B.005P12, m         | 134.88   | 1 |
| tc Rep: Tubulin folding cofactor A - Hordeum vulgare var. distichum (Two-rowed ba | 51.99    | 1 |
| tc Rep: Chromosome undetermined scaffold_245, whole genome shotgun sequenc        | 33.95    | 1 |
| gb KF8C.102B17F.051214T7 KF8 Nicotiana tabacum cDNA clone KF8C.102B17, mRN        | 33.58    | 1 |
| tc Rep: Chromosome chr5 scaffold_64, whole genome shotgun sequence - Vitis vin    | 28.72    | 1 |
| Unknown                                                                           | 23.37    | 1 |
| gb KL4B.104I18F.051104T7 KL4B Nicotiana tabacum cDNA clone KL4B.104I18, mRN       | 28.28    | 1 |
| tc Rep: Chromosome chr6 scaffold_3, whole genome shotgun sequence - Vitis vinif   | 66.21    | 1 |
| Unknown                                                                           | 32.88    | 1 |
| Unknown                                                                           | 361.63   | 1 |
| gb KP1B.109O17F.050727T7 KP1B Nicotiana tabacum cDNA clone KP1B.109O17, m         | 48.37    | 1 |
| Unknown                                                                           | 106.22   | 1 |
| gb KP1B.107M24F.050726T7 KP1B Nicotiana tabacum cDNA clone KP1B.107M24, r         | 57.89    | 1 |
| gb KN6B.110B21F.060106T7 KN6B Nicotiana tabacum cDNA clone KN6B.110B21, r         | 16.98    | 1 |
| tc Rep: EIL1 - Petunia hybrida (Petunia), partial (5%) [TC63787]                  | 238.67   | 1 |
| tc Rep: Chromosome undetermined scaffold_133, whole genome shotgun sequenc        | 179.51   | 1 |
| Unknown                                                                           | 11508.45 | 1 |
| Unknown                                                                           | 16.93    | 1 |

|                                                                                    |         |   |
|------------------------------------------------------------------------------------|---------|---|
| Unknown                                                                            | 45.52   | 1 |
| Unknown                                                                            | 245.08  | 1 |
| tc Rep: ATP synthase subunit a - Nicotiana tabacum (Common tobacco), complete      | 204.08  | 1 |
| tc Rep: Chromosome chr1 scaffold_5, whole genome shotgun sequence - Vitis vinif    | 41.56   | 1 |
| Unknown                                                                            | 19.82   | 1 |
| gb AGN_PNL224df1_b4.trimmed.seq AGN_PNL Nicotiana tabacum cDNA 5', mRNA            | 57.58   | 1 |
| Unknown                                                                            | 24.69   | 1 |
| gb TT-28_F14 K326 trichome library Nicotiana tabacum cDNA, mRNA sequence [FG       | 36.64   | 1 |
| tc Rep: NADH dehydrogenase - Arabidopsis thaliana (Mouse-ear cress), partial (75   | 400     | 1 |
| tc Rep: Ubiquitin carrier protein - Capsicum annuum (Bell pepper), complete [TC47. | 342.83  | 1 |
| Unknown                                                                            | 41.77   | 1 |
| gb TT-20_H01 Burley21 trichome library Nicotiana tabacum cDNA, mRNA sequence       | 1176.99 | 1 |
| Unknown                                                                            | 6746.11 | 1 |
| tc Rep: Dem protein - Solanum lycopersicum (Tomato) (Lycopersicon esculentum),     | 39.89   | 1 |
| tc Rep: AT5g64840/MXK3_6 - Arabidopsis thaliana (Mouse-ear cress), partial (73%)   | 63.49   | 1 |
| gb TT-21_K17 Samsun trichome library Nicotiana tabacum cDNA, mRNA sequence         | 607.1   | 1 |
| tc Rep: Chromosome chr8 scaffold_99, whole genome shotgun sequence - Vitis vin     | 926.38  | 1 |
| gb 15C04 Transformed tobacco Lambda Zap II library Nicotiana tabacum cDNA 5', r    | 24.79   | 1 |
| tc Rep: Hydroproline-rich glycoprotein like protein - Nicotiana tabacum (Common t  | 97.19   | 1 |
| gb KN6B.107O10F.060106T7 KN6B Nicotiana tabacum cDNA clone KN6B.107O10, r          | 113.85  | 1 |
| tc Rep: Chromosome chr19 scaffold_4, whole genome shotgun sequence - Vitis vin     | 98.68   | 1 |
| gb AGN_RNC108xf20f1.ab1 AGN_RNC Nicotiana tabacum cDNA 5', mRNA sequenc            | 46.07   | 1 |
| gb tbt_007895 Normalized Nicotiana tabacum cDNA library Nicotiana tabacum cDN      | 949.36  | 1 |
| Unknown                                                                            | 46.95   | 1 |
| tc Rep: Dehydroascorbate reductase - Solanum tuberosum (Potato), partial (60%) [   | 94.64   | 1 |
| tc Rep: Chromosome chr6 scaffold_3, whole genome shotgun sequence - Vitis vinif    | 1584.18 | 1 |
| Unknown                                                                            | 68.6    | 1 |
| Unknown                                                                            | 852.6   | 1 |
| tc Rep: Ribosomal protein S6-like protein - Solanum tuberosum (Potato), complete   | 21.47   | 1 |
| tc Rep: Chromosome undetermined scaffold_891, whole genome shotgun sequenc         | 458.66  | 1 |
| Unknown                                                                            | 50.44   | 1 |
| gb KF8C.108E23F.051215T7 KF8 Nicotiana tabacum cDNA clone KF8C.108E23, mRN         | 9399.86 | 1 |
| gb KN6B.102G20F.051230T7 KN6B Nicotiana tabacum cDNA clone KN6B.102G20, r          | 539.64  | 1 |
| tc Rep: Chromosome chr11 scaffold_56, whole genome shotgun sequence - Vitis vi     | 933.79  | 1 |

|                                                                                      |         |   |
|--------------------------------------------------------------------------------------|---------|---|
| Unknown                                                                              | 33.63   | 1 |
| tc Rep: Mitochondrial processing peptidase-like - Solanum tuberosum (Potato), par    | 264.04  | 1 |
| gb TT-14_C13 tobacco leaf library Nicotiana tabacum cDNA, mRNA sequence [FG63        | 104.79  | 1 |
| Unknown                                                                              | 192.33  | 1 |
| Unknown                                                                              | 35.45   | 1 |
| tc Rep: ALG2-interacting protein X - Nicotiana tabacum (Common tobacco), partial     | 23.92   | 1 |
| gb TT-13_G17 Samsun trichome library Nicotiana tabacum cDNA, mRNA sequence           | 98.88   | 1 |
| gb KL5B.115B07F.060217T7 KL5B Nicotiana tabacum cDNA clone KL5B.115B07, mR           | 42.81   | 1 |
| gb KL5B.001P11F.050901T7 KL5B Nicotiana tabacum cDNA clone KL5B.001P11, mR           | 405.16  | 1 |
| tc Rep: EIL1 - Nicotiana tabacum (Common tobacco), complete [TC41476]                | 97.85   | 1 |
| tc Rep: Chromosome chr5 scaffold_2, whole genome shotgun sequence - Vitis vinif      | 328.34  | 1 |
| gb TT-20_M23 Samsun trichome library Nicotiana tabacum cDNA, mRNA sequence           | 9264.01 | 1 |
| tc Rep: Chromosome chr8 scaffold_29, whole genome shotgun sequence - Vitis vin       | 223.01  | 1 |
| gb KN6B.115P21F.060127T7 KN6B Nicotiana tabacum cDNA clone KN6B.115P21, m            | 42.92   | 1 |
| gb KR3B.106G05F.051109T7 KR3B Nicotiana tabacum cDNA clone KR3B.106G05, m            | 227.13  | 1 |
| Unknown                                                                              | 1565.76 | 1 |
| gb KF8C.102B08F.051214T7 KF8 Nicotiana tabacum cDNA clone KF8C.102B08, mRN           | 27.05   | 1 |
| Unknown                                                                              | 23.1    | 1 |
| gb KR3B.109F02F.051111T7 KR3B Nicotiana tabacum cDNA clone KR3B.109F02, mF           | 18500.5 | 1 |
| Unknown                                                                              | 44.49   | 1 |
| gb KF8B.201N07F.060124T7 KF8 Nicotiana tabacum cDNA clone KF8B.201N07, mRI           | 27.26   | 1 |
| tc Rep: At2g43020/MFL8.12 - Arabidopsis thaliana (Mouse-ear cress), partial (94%)    | 585.44  | 1 |
| tc Rep: ER lumen protein retaining receptor - Vitis vinifera (Grape), complete [TC56 | 1142.27 | 1 |
| tc Rep: 40S ribosomal protein S4 - Solanum tuberosum (Potato), partial (68%) [TC6:   | 34.4    | 1 |
| gb KT7C.104K05F.051219T7 KT7 Nicotiana tabacum cDNA clone KT7C.104K05, mRN           | 762.61  | 1 |
| Unknown                                                                              | 57.62   | 1 |
| gb KL5B.111A10F.060117T7 KL5B Nicotiana tabacum cDNA clone KL5B.111A10, mF           | 3288.15 | 1 |
| Unknown                                                                              | 34.74   | 1 |
| tc Rep: 4-hydroxyphenylpyruvate dioxygenase - Daucus carota (Carrot), partial (47%   | 53.83   | 1 |
| tc Rep: Chromosome chr19 scaffold_111, whole genome shotgun sequence - Vitis v       | 97.94   | 1 |
| tc Rep: Chromosome chr8 scaffold_88, whole genome shotgun sequence - Vitis vin       | 9450.72 | 1 |
| Unknown                                                                              | 577.77  | 1 |
| Unknown                                                                              | 29.14   | 1 |
| tc Rep: Chromosome chr12 scaffold_18, whole genome shotgun sequence - Vitis vi       | 96.29   | 1 |

|                                                                                                             |         |   |
|-------------------------------------------------------------------------------------------------------------|---------|---|
| tc Rep: Chlorophyll a/b binding protein CP29 - Phaseolus aureus (Mung bean) (Vign                           | 255.88  | 1 |
| gb N.tabacum mRNA for ornithine decarboxylase [Y10472]                                                      | 639.21  | 1 |
| Unknown                                                                                                     | 41.57   | 1 |
| tc Rep: Chromosome chr18 scaffold_137, whole genome shotgun sequence - Vitis v                              | 73.12   | 1 |
| gb KF8C.105O11F.051215T7 KF8 Nicotiana tabacum cDNA clone KF8C.105O11, mRI                                  | 212.21  | 1 |
| gb AGN_PNL221df1_g3.trimmed.seq AGN_PNL Nicotiana tabacum cDNA 5', mRNA                                     | 541.44  | 1 |
| gb KG9B.002I22F.050720T7 KG9B Nicotiana tabacum cDNA clone KG9B.002I22, mR                                  | 48.57   | 1 |
| gb KT7B.100K06F.051010T7 KT7 Nicotiana tabacum cDNA clone KT7B.100K06, mRI                                  | 3475.54 | 1 |
| Unknown                                                                                                     | 112.74  | 1 |
| tc Rep: SNF1-related kinase complex anchoring protein SIP1 - Solanum lycopersicur                           | 144.48  | 1 |
| gb KP1B.109H22F.050727T7 KP1B Nicotiana tabacum cDNA clone KP1B.109H22, m                                   | 66.75   | 1 |
| Unknown                                                                                                     | 105.62  | 1 |
| tc Rep: Na <sup>+</sup> /H <sup>+</sup> antiporter precursor - Populus euphratica (Euphrates poplar), parti | 169.21  | 1 |
| tc Rep: MYB transcription factor - Catharanthus roseus (Rosy periwinkle) (Madagas                           | 24.01   | 1 |
| tc Rep: Chromosome chr2 scaffold_105, whole genome shotgun sequence - Vitis vi                              | 295.54  | 1 |
| gb Nicotiana tabacum mRNA for SET-domain-containing protein (set1 gene) [AJ294                              | 260.31  | 1 |
| gb KL4B.101A01F.051103T7 KL4B Nicotiana tabacum cDNA clone KL4B.101A01, mF                                  | 21.24   | 1 |
| gb AGN_PNL225bf1_h12.trimmed.seq AGN_PNL Nicotiana tabacum cDNA 5', mRN.                                    | 7877.44 | 1 |
| gb TT-22_M21 K326 late senescent leaf library Nicotiana tabacum cDNA, mRNA sec                              | 25.71   | 1 |
| gb Nicotiana tabacum mRNA for putative cytosolic cysteine synthase 7 (oas7 gene)                            | 1160.99 | 1 |
| tc Rep: Chromosome chr19 scaffold_4, whole genome shotgun sequence - Vitis vin                              | 185.29  | 1 |
| Unknown                                                                                                     | 21.02   | 1 |
| tc Rep: Glycine-rich protein-like - Oryza sativa subsp. japonica (Rice), partial (35%) [                    | 178.7   | 1 |
| gb AGN_RNC116xg18f1.ab1 AGN_RNC Nicotiana tabacum cDNA 5', mRNA sequenc                                     | 171.88  | 1 |
| Unknown                                                                                                     | 87.11   | 1 |
| tc Rep: Complex: S. cerevisiae L29 is part of the 60S subunit of the ribosome - Aspe                        | 18.22   | 1 |
| Unknown                                                                                                     | 81.01   | 1 |
| Unknown                                                                                                     | 269.07  | 1 |
| gb AGN_RPC013xb23f1.ab1 AGN_RPC Nicotiana tabacum cDNA 5', mRNA sequenc                                     | 30.06   | 1 |
| Unknown                                                                                                     | 400.69  | 1 |
| tc Rep: Malonyl-CoA:ACP transacylase - Perilla frutescens (Beefsteak plant) (Chines                         | 270.03  | 1 |
| tc Rep: Chromosome chr8 scaffold_34, whole genome shotgun sequence - Vitis vin                              | 1921.35 | 1 |
| gb KP1B.037B08F.050628T7 KP1B Nicotiana tabacum cDNA clone KP1B.037B08, ml                                  | 30.43   | 1 |
| gb KN6B.110M01F.060106T7 KN6B Nicotiana tabacum cDNA clone KN6B.110M01,                                     | 69.38   | 1 |

|                                                                                      |         |   |
|--------------------------------------------------------------------------------------|---------|---|
| Unknown                                                                              | 9070.69 | 1 |
| tc Rep: Chromosome chr1 scaffold_84, whole genome shotgun sequence - Vitis vin       | 42.45   | 1 |
| tc Rep: Chromosome chr17 scaffold_16, whole genome shotgun sequence - Vitis vi       | 86.11   | 1 |
| tc Rep: Voltage-dependent anion channel - Nicotiana tabacum (Common tobacco),        | 128.34  | 1 |
| Unknown                                                                              | 50.46   | 1 |
| tc Rep: AG-motif binding protein-2 - Nicotiana tabacum (Common tobacco), compl       | 96.87   | 1 |
| Unknown                                                                              | 258.7   | 1 |
| gb KT7B.103E12F.060124T7 KT7 Nicotiana tabacum cDNA clone KT7B.103E12, mRN           | 93.62   | 1 |
| Unknown                                                                              | 26.01   | 1 |
| gb CHO_SL023xa21f1.ab1 CHO_SL Nicotiana tabacum cDNA, mRNA sequence [EH6             | 3439.66 | 1 |
| gb KT7C.113L02F.051221T7 KT7 Nicotiana tabacum cDNA clone KT7C.113L02, mRN           | 21.71   | 1 |
| Unknown                                                                              | 205.82  | 1 |
| gb KL5B.112K19F.060210T7 KL5B Nicotiana tabacum cDNA clone KL5B.112K19, mR           | 1581.61 | 1 |
| Unknown                                                                              | 253.14  | 1 |
| Unknown                                                                              | 84.31   | 1 |
| Unknown                                                                              | 967.03  | 1 |
| gb AGN_PNL227cf1_f6.trimmed.seq AGN_PNL Nicotiana tabacum cDNA 5', mRNA :            | 22.38   | 1 |
| gb KR2B.001O08F.050815T7 KR2B Nicotiana tabacum cDNA clone KR2B.001O08, r            | 19.81   | 1 |
| Unknown                                                                              | 32.55   | 1 |
| Unknown                                                                              | 34.84   | 1 |
| Unknown                                                                              | 41.47   | 1 |
| gb KL4B.106E21F.051125T7 KL4B Nicotiana tabacum cDNA clone KL4B.106E21, mR           | 35.85   | 1 |
| tc Rep: Chromosome chr8 scaffold_34, whole genome shotgun sequence - Vitis vin       | 46.27   | 1 |
| tc Rep: 40S ribosomal protein S7 - Avicennia marina (Grey mangrove), complete [T     | 1012.11 | 1 |
| tc Rep: ChaC-like family protein-like - Solanum tuberosum (Potato), partial (94%) [T | 3180.31 | 1 |
| tc Rep: Chromosome chr14 scaffold_21, whole genome shotgun sequence - Vitis vi       | 32.37   | 1 |
| tc Rep: Zinc finger, RING-type; Thioredoxin-related - Medicago truncatula (Barrel m  | 86.29   | 1 |
| Unknown                                                                              | 226.61  | 1 |
| gb FS436570 normalized full-length tobacco cDNA library Nicotiana tabacum cDNA       | 76.97   | 1 |
| gb KP1B.103D12F.050725T7 KP1B Nicotiana tabacum cDNA clone KP1B.103D12, m            | 142     | 1 |
| tc Rep: Soluble inorganic pyrophosphatase - Solanum tuberosum (Potato), partial (!   | 981.01  | 1 |
| tc Rep: Chromosome chr6 scaffold_3, whole genome shotgun sequence - Vitis vinif      | 191.03  | 1 |
| Unknown                                                                              | 62.29   | 1 |
| gb KR3B.109H16F.051111T7 KR3B Nicotiana tabacum cDNA clone KR3B.109H16, m            | 27.74   | 1 |

|                                                                                               |         |   |
|-----------------------------------------------------------------------------------------------|---------|---|
| tc Rep: Chromosome chr5 scaffold_2, whole genome shotgun sequence - Vitis vinifera            | 1121.68 | 1 |
| tc Rep: Chromosome chr6 scaffold_25, whole genome shotgun sequence - Vitis vinifera           | 94.96   | 1 |
| Unknown                                                                                       | 35.19   | 1 |
| tc Rep: Chromosome chr13 scaffold_17, whole genome shotgun sequence - Vitis vinifera          | 584.56  | 1 |
| gb KG9B.103F10F.051128T7 KG9B Nicotiana tabacum cDNA clone KG9B.103F10, mRNA sequence         | 30.18   | 1 |
| gb KG9B.102C17F.051126T7 KG9B Nicotiana tabacum cDNA clone KG9B.102C17, mRNA sequence         | 327.31  | 1 |
| Unknown                                                                                       | 827.92  | 1 |
| gb KL4B.109B08F.051108T7 KL4B Nicotiana tabacum cDNA clone KL4B.109B08, mRNA sequence         | 191.54  | 1 |
| gb AGN_RNC123xf10f1.ab1 AGN_RNC Nicotiana tabacum cDNA 5', mRNA sequence                      | 210.67  | 1 |
| Unknown                                                                                       | 18.9    | 1 |
| tc Rep: Ly200 protein - Capsicum annuum (Bell pepper), complete [TC55451]                     | 41.35   | 1 |
| gb FS399667 normalized full-length tobacco cDNA library Nicotiana tabacum cDNA                | 1829.68 | 1 |
| tc Rep: Phosphoenolpyruvate carboxylase - Solanum tuberosum (Potato), partial (80%) [TC49360] | 109.33  | 1 |
| tc Rep: Glutathione S-transferase, class-phi - Solanum commersonii (Commerson's tobacco)      | 128.04  | 1 |
| gb TT-38_N08 Samsun trichome library Nicotiana tabacum cDNA, mRNA sequence                    | 169.68  | 1 |
| gb AGN_RNC013xl12f1.ab1 AGN_RNC Nicotiana tabacum cDNA 5', mRNA sequence                      | 67.13   | 1 |
| gb TT-16_K24 K326 early senescent leaf library Nicotiana tabacum cDNA, mRNA sequence          | 71.61   | 1 |
| gb KL4B.105H09F.051104T7 KL4B Nicotiana tabacum cDNA clone KL4B.105H09, mRNA sequence         | 165.99  | 1 |
| Unknown                                                                                       | 4319.57 | 1 |
| Unknown                                                                                       | 20.73   | 1 |
| gb KG9B.104B10F.060120T7 KG9B Nicotiana tabacum cDNA clone KG9B.104B10, mRNA sequence         | 152.38  | 1 |
| tc Rep: 3'-5' exonuclease domain-containing protein-like - Solanum tuberosum (Potato)         | 9897.3  | 1 |
| tc Rep: PttA - Petunia hybrida (Petunia), partial (39%) [TC49360]                             | 1292.13 | 1 |
| tc Rep: Predicted protein - Chlamydomonas reinhardtii, partial (4%) [TC73662]                 | 1913.55 | 1 |
| Unknown                                                                                       | 25.98   | 1 |
| gb AGN_RNC117xl01r1.ab1 AGN_RNC Nicotiana tabacum cDNA 3', mRNA sequence                      | 24.7    | 1 |
| gb CHO_SL011xo14f1.ab1 CHO_SL Nicotiana tabacum cDNA, mRNA sequence [EH60000]                 | 34.28   | 1 |
| gb AGN_ELP002xl14f1.ab1 AGN_ELP Nicotiana tabacum cDNA 5', mRNA sequence                      | 183.05  | 1 |
| tc Rep: Chromosome chr19 scaffold_4, whole genome shotgun sequence - Vitis vinifera           | 717.98  | 1 |
| gb Nicotiana tabacum mRNA for calmodulin NtCaM1, complete cds [AB050837]                      | 1098.29 | 1 |
| Unknown                                                                                       | 1601.16 | 1 |
| tc Rep: Chromosome chr19 scaffold_4, whole genome shotgun sequence - Vitis vinifera           | 2928.6  | 1 |
| gb KG9B.102A05F.051126T7 KG9B Nicotiana tabacum cDNA clone KG9B.102A05, mRNA sequence         | 107.34  | 1 |
| gb KR3B.111G24F.060119T7 KR3B Nicotiana tabacum cDNA clone KR3B.111G24, mRNA sequence         | 3556.91 | 1 |



|                                                                                      |          |   |
|--------------------------------------------------------------------------------------|----------|---|
| tc Rep: F2P3.9 protein - Arabidopsis thaliana (Mouse-ear cress), partial (24%) [TC63 | 27.29    | 1 |
| Unknown                                                                              | 22.1     | 1 |
| gb KN6B.108L12F.060106T7 KN6B Nicotiana tabacum cDNA clone KN6B.108L12, m            | 84.83    | 1 |
| gb CHO_SL012xm16f1.ab1 CHO_SL Nicotiana tabacum cDNA, mRNA sequence [EH6             | 563.07   | 1 |
| Unknown                                                                              | 73.09    | 1 |
| tc Rep: Chromosome chr16 scaffold_10, whole genome shotgun sequence - Vitis vi       | 167.77   | 1 |
| gb AGN_PNL226bf1_h4.trimmed.seq AGN_PNL Nicotiana tabacum cDNA 5', mRNA              | 23.72    | 1 |
| tc Rep: Chromosome chr4 scaffold_6, whole genome shotgun sequence - Vitis vinif      | 65.25    | 1 |
| gb KP1B.103J03F.050725T7 KP1B Nicotiana tabacum cDNA clone KP1B.103J03, mR           | 23.29    | 1 |
| gb FS405146 normalized full-length tobacco cDNA library Nicotiana tabacum cDNA       | 28.22    | 1 |
| gb KR3B.110C13F.051111T7 KR3B Nicotiana tabacum cDNA clone KR3B.110C13, m            | 8065.7   | 1 |
| tc Rep: Cellulose synthase - Solanum tuberosum (Potato), partial (40%) [TC50352]     | 26.51    | 1 |
| tc Rep: Chromosome chr19 scaffold_4, whole genome shotgun sequence - Vitis vin       | 28.43    | 1 |
| tc Rep: Chromosome chr7 scaffold_20, whole genome shotgun sequence - Vitis vin       | 1067.4   | 1 |
| tc Rep: Chromosome chr14 scaffold_27, whole genome shotgun sequence - Vitis vi       | 9518.3   | 1 |
| tc Rep: Chromosome chr15 scaffold_19, whole genome shotgun sequence - Vitis vi       | 549.89   | 1 |
| tc Rep: NtEIG-E80 protein - Nicotiana tabacum (Common tobacco), partial (87%) [T     | 34416.15 | 1 |
| Unknown                                                                              | 223.55   | 1 |
| gb AGN_RPC023xd13f1.ab1 AGN_RPC Nicotiana tabacum cDNA 5', mRNA sequenc              | 135.06   | 1 |
| gb KT7C.112O19F.051221T7 KT7 Nicotiana tabacum cDNA clone KT7C.112O19, mR            | 319.33   | 1 |
| gb Nicotiana tabacum sucrose-phosphate synthase isoform B (SPSB) mRNA, compl         | 481.08   | 1 |
| tc Rep: Ovule receptor-like kinase 28 precursor - Solanum chacoense (Chaco potat     | 29.75    | 1 |
| Unknown                                                                              | 177.7    | 1 |
| tc Rep: Calcium-dependent protein kinase CDPK1 - Solanum lycopersicum (Tomato        | 24.79    | 1 |
| Unknown                                                                              | 31.45    | 1 |
| gb Nicotiana tabacum urate oxidase mRNA, complete cds [DQ365933]                     | 19.06    | 1 |
| gb KR3B.106G20F.051109T7 KR3B Nicotiana tabacum cDNA clone KR3B.106G20, m            | 783.24   | 1 |
| Unknown                                                                              | 525.15   | 1 |
| gb TT-07_D22 K326 trichome library Nicotiana tabacum cDNA, mRNA sequence [FC         | 19.11    | 1 |
| gb KN6B.103M10F.060103T7 KN6B Nicotiana tabacum cDNA clone KN6B.103M10,              | 24.75    | 1 |
| Unknown                                                                              | 2778.77  | 1 |
| gb Nicotiana tabacum arginine decarboxylase mRNA, complete cds [AF321137]            | 9815.62  | 1 |
| tc Rep: Chromosome chr1 scaffold_5, whole genome shotgun sequence - Vitis vinif      | 159.41   | 1 |
| gb TOBESTR059A07 TOBEST cDNA library 1 Nicotiana tabacum cDNA 5', mRNA seq           | 273.11   | 1 |

|                                                                                    |          |   |
|------------------------------------------------------------------------------------|----------|---|
| tc Rep: Chromosome chr1 scaffold_180, whole genome shotgun sequence - Vitis vi     | 93.77    | 1 |
| gb KN6B.101A12F.051230T7 KN6B Nicotiana tabacum cDNA clone KN6B.101A12, n          | 43.48    | 1 |
| gb KL4B.113D21F.060131T7 KL4B Nicotiana tabacum cDNA clone KL4B.113D21, mF         | 18.86    | 1 |
| gb CHO_SL018xj10f1.ab1 CHO_SL Nicotiana tabacum cDNA, mRNA sequence [EH61          | 1599.46  | 1 |
| tc Rep: Chromosome chr8 scaffold_115, whole genome shotgun sequence - Vitis vi     | 208.23   | 1 |
| Unknown                                                                            | 29.38    | 1 |
| gb KF8C.102A10F.051214T7 KF8 Nicotiana tabacum cDNA clone KF8C.102A10, mRN         | 209.42   | 1 |
| Unknown                                                                            | 58.15    | 1 |
| tc Rep: Ubiquitin-conjugating enzyme family protein-like protein - Solanum tuberos | 106.53   | 1 |
| gb TT-47_G16 Samsun trichome library Nicotiana tabacum cDNA, mRNA sequence         | 133.09   | 1 |
| gb KF8C.102E08F.051214T7 KF8 Nicotiana tabacum cDNA clone KF8C.102E08, mRN         | 95.05    | 1 |
| gb TT-15_M17 Burley21 trichome library Nicotiana tabacum cDNA, mRNA sequenc        | 29.78    | 1 |
| Unknown                                                                            | 161.01   | 1 |
| gb KF8B.201P01F.060124T7 KF8 Nicotiana tabacum cDNA clone KF8B.201P01, mRN         | 139.66   | 1 |
| Unknown                                                                            | 24.93    | 1 |
| gb Nicotiana tabacum cytosolic aconitase (ACO) mRNA, complete cds [AF194945]       | 38.18    | 1 |
| gb CHO_SL023xn20f1.ab1 CHO_SL Nicotiana tabacum cDNA, mRNA sequence [EH6           | 2293.59  | 1 |
| gb KT7C.108D17F.051219T7 KT7 Nicotiana tabacum cDNA clone KT7C.108D17, mRN         | 186.87   | 1 |
| gb KF8B.200A11F.060120T7 KF8 Nicotiana tabacum cDNA clone KF8B.200A11, mRN         | 474.95   | 1 |
| tc Rep: Chromosome chr8 scaffold_68, whole genome shotgun sequence - Vitis vin     | 201.05   | 1 |
| gb TT-23_C05 Samsun trichome library Nicotiana tabacum cDNA, mRNA sequence         | 122.56   | 1 |
| Unknown                                                                            | 20.42    | 1 |
| gb BP534517 MAT005 Nicotiana tabacum cDNA clone BY33097, mRNA sequence [E          | 167.73   | 1 |
| gb KF8C.101E16F.051214T7 KF8 Nicotiana tabacum cDNA clone KF8C.101E16, mRN         | 214.85   | 1 |
| tc Rep: Chromosome undetermined scaffold_203, whole genome shotgun sequenc         | 11066.15 | 1 |
| Unknown                                                                            | 169.9    | 1 |
| tc Rep: Chromosome chr9 scaffold_65, whole genome shotgun sequence - Vitis vin     | 102.64   | 1 |
| gb AGN_RPC002xi02f1.ab1 AGN_RPC Nicotiana tabacum cDNA 5', mRNA sequence           | 49.57    | 1 |
| Unknown                                                                            | 31.01    | 1 |
| Unknown                                                                            | 17.58    | 1 |
| gb KP1B.107H01F.050726T7 KP1B Nicotiana tabacum cDNA clone KP1B.107H01, m          | 150.79   | 1 |
| Unknown                                                                            | 53.51    | 1 |
| gb TT-30_J08 K326 late senescent leaf library Nicotiana tabacum cDNA, mRNA seq     | 319.45   | 1 |
| Unknown                                                                            | 476.38   | 1 |

|                                                                                    |         |   |
|------------------------------------------------------------------------------------|---------|---|
| gb KL4B.106M13F.051125T7 KL4B Nicotiana tabacum cDNA clone KL4B.106M13, m          | 106.77  | 1 |
| tc Rep: Chromosome undetermined scaffold_1484, whole genome shotgun sequen         | 2429.48 | 1 |
| tc Rep: Chromosome chr4 scaffold_6, whole genome shotgun sequence - Vitis vinif    | 410.71  | 1 |
| tc Rep: Chromosome chr6 scaffold_3, whole genome shotgun sequence - Vitis vinif    | 263.08  | 1 |
| tc CPY18934 Solanum nigrum chloroplast tRNA-Ala, tRNA-Ile, 16S rRNA, tRNA-Val, l   | 1254.49 | 1 |
| gb BP533691 MAT005 Nicotiana tabacum cDNA clone BY31006, mRNA sequence [E          | 37.27   | 1 |
| Unknown                                                                            | 1673.72 | 1 |
| gb KL4B.110E10F.051106T7 KL4B Nicotiana tabacum cDNA clone KL4B.110E10, mR         | 60.18   | 1 |
| Unknown                                                                            | 21.88   | 1 |
| gb KG9B.101O01F.060120T7 KG9B Nicotiana tabacum cDNA clone KG9B.101O01, r          | 140.1   | 1 |
| Unknown                                                                            | 507.74  | 1 |
| gb AGN_RNC127xf14f1.ab1 AGN_RNC Nicotiana tabacum cDNA 5', mRNA sequenc            | 26.83   | 1 |
| gb AM824642 seedling library, SL Nicotiana tabacum cDNA clone nt002330037, mF      | 31      | 1 |
| tc Rep: Pyruvate dehydrogenase E1 beta subunit isoform 2 - Zea mays (Maize), part  | 190.34  | 1 |
| Unknown                                                                            | 41.27   | 1 |
| gb KL4B.113I12F.060131T7 KL4B Nicotiana tabacum cDNA clone KL4B.113I12, mRN        | 198.01  | 1 |
| tc Rep: Chromosome chr18 scaffold_1, whole genome shotgun sequence - Vitis vin     | 150.83  | 1 |
| gb AGN_RNC109xi21f1.ab1 AGN_RNC Nicotiana tabacum cDNA 5', mRNA sequenc            | 46.41   | 1 |
| gb TT-09_B10 K326 trichome library Nicotiana tabacum cDNA, mRNA sequence [FC       | 27.13   | 1 |
| Unknown                                                                            | 1299.28 | 1 |
| tc Rep: Chromosome chr17 scaffold_16, whole genome shotgun sequence - Vitis vi     | 42.08   | 1 |
| gb Nicotiana tabacum cDNA-AFLP-fragment BSTT2-32-460, cultivar Bright Yellow 2     | 252.72  | 1 |
| gb Nicotiana tabacum adenyl cyclase (Axi 141) mRNA, complete cds [AF026389]        | 17.43   | 1 |
| gb KL4B.111C19F.060128T7 KL4B Nicotiana tabacum cDNA clone KL4B.111C19, mR         | 30.76   | 1 |
| Unknown                                                                            | 603.42  | 1 |
| Unknown                                                                            | 831.53  | 1 |
| tc Rep: Chromosome chr19 scaffold_66, whole genome shotgun sequence - Vitis vi     | 379.32  | 1 |
| tc Rep: Chromosome chr11 scaffold_13, whole genome shotgun sequence - Vitis vi     | 18.16   | 1 |
| gb FS406426 normalized full-length tobacco cDNA library Nicotiana tabacum cDNA     | 107.07  | 1 |
| gb CHO_SL008xm11f1.ab1 CHO_SL Nicotiana tabacum cDNA, mRNA sequence [EHf           | 134.64  | 1 |
| tc Rep: Chromosome chr19 scaffold_126, whole genome shotgun sequence - Vitis v     | 1085.61 | 1 |
| gb AGN_RPC022xm24f1.ab1 AGN_RPC Nicotiana tabacum cDNA 5', mRNA sequenc            | 33.26   | 1 |
| tc Rep: Glycoprotein-like protein - Solanum tuberosum (Potato), partial (97%) [TC5 | 27.82   | 1 |
| Unknown                                                                            | 18.75   | 1 |

|                                                                                      |         |   |
|--------------------------------------------------------------------------------------|---------|---|
| gb Nicotiana tabacum receptor-like protein kinase (PRK2) mRNA, partial cds [AF246    | 2839.53 | 1 |
| Unknown                                                                              | 24.12   | 1 |
| Unknown                                                                              | 29.54   | 1 |
| Unknown                                                                              | 2036.14 | 1 |
| gb KL4B.103L05F.051103T7 KL4B Nicotiana tabacum cDNA clone KL4B.103L05, mR           | 1378.94 | 1 |
| tc Rep: Os01g0170400 protein - Oryza sativa subsp. japonica (Rice), partial (7%) [TC | 501.29  | 1 |
| tc Rep: Chromosome chr5 scaffold_2, whole genome shotgun sequence - Vitis vinif      | 267.13  | 1 |
| gb KG9B.001A11F.050628T7 KG9B Nicotiana tabacum cDNA clone KG9B.001A11, n            | 744.04  | 1 |
| Unknown                                                                              | 987.33  | 1 |
| gb TT-12_L01 Samsun trichome library Nicotiana tabacum cDNA, mRNA sequence [         | 6419.59 | 1 |
| gb AGN_RNC022xa22f1.ab1 AGN_RNC Nicotiana tabacum cDNA 5', mRNA sequenc              | 134.57  | 1 |
| gb AGN_RNC017xc08f1.ab1 AGN_RNC Nicotiana tabacum cDNA 5', mRNA sequenc              | 27.73   | 1 |
| Unknown                                                                              | 31.59   | 1 |
| Unknown                                                                              | 37.21   | 1 |
| Unknown                                                                              | 127.35  | 1 |
| Unknown                                                                              | 405.43  | 1 |
| gb KN6B.103P10F.060103T7 KN6B Nicotiana tabacum cDNA clone KN6B.103P10, n            | 36.06   | 1 |
| Unknown                                                                              | 233.28  | 1 |
| gb KL5B.114H13F.060217T7 KL5B Nicotiana tabacum cDNA clone KL5B.114H13, mF           | 36.42   | 1 |
| Unknown                                                                              | 943.03  | 1 |
| tc Rep: Glycolate oxidase - Solanum lycopersicum (Tomato) (Lycopersicon esculent     | 65.58   | 1 |
| gb KR2B.110H02F.051229T7 KR2B Nicotiana tabacum cDNA clone KR2B.110H02, m            | 17.46   | 1 |
| gb AGN_PNL202df1_a7.trimmed.seq AGN_PNL Nicotiana tabacum cDNA 5', mRNA              | 76.31   | 1 |
| gb TT-07_L12 Samsun trichome library Nicotiana tabacum cDNA, mRNA sequence [         | 34.91   | 1 |
| Unknown                                                                              | 150.16  | 1 |
| gb AGN_ELP006xd10f1.ab1 AGN_ELP Nicotiana tabacum cDNA 5', mRNA sequence             | 57.45   | 1 |
| Unknown                                                                              | 19.67   | 1 |
| gb KR2B.108I01F.051229T7 KR2B Nicotiana tabacum cDNA clone KR2B.108I01, mR           | 93.69   | 1 |
| tc Rep: Eukaryotic initiation factor 4A-9 - Nicotiana tabacum (Common tobacco), c    | 1148.53 | 1 |
| Unknown                                                                              | 248.9   | 1 |
| Unknown                                                                              | 189.08  | 1 |
| gb KG9B.001K05F.050628T7 KG9B Nicotiana tabacum cDNA clone KG9B.001K05, m            | 57.93   | 1 |
| gb KG9B.004E10F.050721T7 KG9B Nicotiana tabacum cDNA clone KG9B.004E10, m            | 156.65  | 1 |
| Unknown                                                                              | 26.12   | 1 |

|                                                                                   |         |   |
|-----------------------------------------------------------------------------------|---------|---|
| Unknown                                                                           | 19.82   | 1 |
| gb KG9B.005P12F.050721T7 KG9B Nicotiana tabacum cDNA clone KG9B.005P12, m         | 73.77   | 1 |
| gb Nicotiana tabacum JD1 (JD1) mRNA, complete cds [AF316320]                      | 577.34  | 1 |
| Unknown                                                                           | 32.09   | 1 |
| gb KL4B.101N15F.051103T7 KL4B Nicotiana tabacum cDNA clone KL4B.101N15, m         | 544.45  | 1 |
| Unknown                                                                           | 21.45   | 1 |
| gb FS419329 normalized full-length tobacco cDNA library Nicotiana tabacum cDNA    | 1786.63 | 1 |
| tc Rep: Tyrosyl-tRNA synthetase - Nicotiana tabacum (Common tobacco), partial (1  | 18.26   | 1 |
| tc Rep: Chromosome chr5 scaffold_2, whole genome shotgun sequence - Vitis vinif   | 1329.52 | 1 |
| tc Rep: Farnesyl pyrophosphate synthase - Solanum lycopersicum (Tomato) (Lycop    | 236.63  | 1 |
| Unknown                                                                           | 27.41   | 1 |
| gb FS417684 normalized full-length tobacco cDNA library Nicotiana tabacum cDNA    | 466.84  | 1 |
| Unknown                                                                           | 125.61  | 1 |
| tc Rep: CXE carboxylesterase - Malus pumila, partial (59%) [TC55745]              | 28.18   | 1 |
| tc Rep: Chromosome chr7 scaffold_42, whole genome shotgun sequence - Vitis vin    | 43.16   | 1 |
| tc Rep: Chromosome chr12 scaffold_18, whole genome shotgun sequence - Vitis vi    | 59.53   | 1 |
| Unknown                                                                           | 48.82   | 1 |
| Unknown                                                                           | 51.09   | 1 |
| gb CHO_SL019xe14f1.ab1 CHO_SL Nicotiana tabacum cDNA, mRNA sequence [EH6          | 613.12  | 1 |
| gb AGN_RNC124xh08f1.ab1 AGN_RNC Nicotiana tabacum cDNA 5', mRNA sequenc           | 23.28   | 1 |
| tc Rep: Acetyl-coenzyme A carboxylase carboxyl transferase subunit alpha - Lactob | 429.36  | 1 |
| tc Rep: Chromosome chr8 scaffold_29, whole genome shotgun sequence - Vitis vin    | 185.44  | 1 |
| gb AGN_RNC029xh18f1.ab1 AGN_RNC Nicotiana tabacum cDNA 5', mRNA sequenc           | 18.71   | 1 |
| tc Rep: Uncharacterized protein At2g18460.2 - Arabidopsis thaliana (Mouse-ear cre | 25.1    | 1 |
| Unknown                                                                           | 87.03   | 1 |
| tc Rep: 14-3-3 protein isoform g - Nicotiana tabacum (Common tobacco), complete   | 90.58   | 1 |
| Unknown                                                                           | 92.19   | 1 |
| Unknown                                                                           | 20.68   | 1 |
| tc Rep: Chromosome chr17 scaffold_101, whole genome shotgun sequence - Vitis v    | 519.45  | 1 |
| gb N.tabacum mRNA for pyruvate kinase (plastid isozyme) [Z28374]                  | 1887.86 | 1 |
| Unknown                                                                           | 103.82  | 1 |
| tc Rep: Chromosome chr7 scaffold_20, whole genome shotgun sequence - Vitis vin    | 913.14  | 1 |
| gb Nicotiana tabacum mRNA for vacuolar invertase (vi gene) [AJ305044]             | 59.15   | 1 |
| Unknown                                                                           | 492.37  | 1 |

|                                                                                     |          |   |
|-------------------------------------------------------------------------------------|----------|---|
| tc Rep: UDP-glucose glucosyltransferase - Catharanthus roseus (Rosy periwinkle) (N  | 241.21   | 1 |
| tc Rep: Signal peptidase 22 kDa subunit - Medicago truncatula (Barrel medic), parti | 1558.95  | 1 |
| tc Rep: Chromosome chr19 scaffold_35, whole genome shotgun sequence - Vitis vi      | 86.42    | 1 |
| gb AGN_RPC005xc12f1.ab1 AGN_RPC Nicotiana tabacum cDNA 5', mRNA sequence            | 56.71    | 1 |
| tc Rep: Chromosome chr8 scaffold_34, whole genome shotgun sequence - Vitis vin      | 76.95    | 1 |
| Unknown                                                                             | 25.8     | 1 |
| tc CAB63010.1 - Arabidopsis thaliana (Mouse-ear cress), partial (35%) [TC72930]     | 1667.59  | 1 |
| tc Rep: Chromosome chr9 scaffold_33, whole genome shotgun sequence - Vitis vin      | 10484.35 | 1 |
| Unknown                                                                             | 195.13   | 1 |
| gb BL12.104I03F.060309T7 BL12 Nicotiana tabacum cDNA clone BL12.104I03, mRN         | 584.01   | 1 |
| tc Rep: Chromosome undetermined scaffold_484, whole genome shotgun sequenc          | 594.59   | 1 |
| gb FS416927 normalized full-length tobacco cDNA library Nicotiana tabacum cDNA      | 614.16   | 1 |
| Unknown                                                                             | 103.03   | 1 |
| gb TOBESTR007A07 TOBEST cDNA library 1 Nicotiana tabacum cDNA 5', mRNA seq          | 69.87    | 1 |
| tc Rep: Transcription factor - Nicotiana tabacum (Common tobacco), partial (33%)    | 57.25    | 1 |
| tc Rep: Chromosome chr1 scaffold_180, whole genome shotgun sequence - Vitis vi      | 671.7    | 1 |
| Unknown                                                                             | 80.16    | 1 |
| tc Rep: Chromosome chr13 scaffold_17, whole genome shotgun sequence - Vitis vi      | 198.71   | 1 |
| gb KN6B.101H18F.051230T7 KN6B Nicotiana tabacum cDNA clone KN6B.101H18, n           | 453.63   | 1 |
| Unknown                                                                             | 22.1     | 1 |
| Unknown                                                                             | 54.45    | 1 |
| tc Rep: Chromosome chr4 scaffold_443, whole genome shotgun sequence - Vitis vi      | 75.09    | 1 |
| gb ntsm10 embryogenic microspores Nicotiana tabacum cDNA, mRNA sequence [E          | 211.1    | 1 |
| gb KF8C.101D18F.051214T7 KF8 Nicotiana tabacum cDNA clone KF8C.101D18, mRN          | 97.86    | 1 |
| tc Rep: Chromosome chr5 scaffold_2, whole genome shotgun sequence - Vitis vinif     | 1308.3   | 1 |
| gb AGN_PNL227df1_e5.trimmed.seq AGN_PNL Nicotiana tabacum cDNA 5', mRNA             | 27.61    | 1 |
| Unknown                                                                             | 25.41    | 1 |
| gb KL4B.106C07F.051125T7 KL4B Nicotiana tabacum cDNA clone KL4B.106C07, mR          | 30.34    | 1 |
| tc Rep: Phospho-2-dehydro-3-deoxyheptonate aldolase 2, chloroplast precursor - S    | 8574.15  | 1 |
| Unknown                                                                             | 39.6     | 1 |
| Unknown                                                                             | 436.49   | 1 |
| gb KR3B.105J07F.051109T7 KR3B Nicotiana tabacum cDNA clone KR3B.105J07, mR          | 37.21    | 1 |
| gb TT-07_L07 K326 late senescent leaf library Nicotiana tabacum cDNA, mRNA seq      | 110.58   | 1 |
| tc Rep: Chromosome chr16 scaffold_86, whole genome shotgun sequence - Vitis vi      | 21.2     | 1 |

|                                                                                        |         |   |
|----------------------------------------------------------------------------------------|---------|---|
| Unknown                                                                                | 61.25   | 1 |
| tc Rep: Chromosome chr6 scaffold_15, whole genome shotgun sequence - Vitis vin         | 41.38   | 1 |
| tc Rep: Chromosome chr1 scaffold_5, whole genome shotgun sequence - Vitis vinif        | 257.61  | 1 |
| gb Nicotiana tabacum hexokinase 1a (Hxk1a) mRNA, complete cds [AY553214]               | 1629.83 | 1 |
| gb Nicotiana tabacum mRNA for chloroplast ribosomal protein L4, complete cds [A        | 2739.71 | 1 |
| gb KT7B.114K15F.060127T7 KT7 Nicotiana tabacum cDNA clone KT7B.114K15, mRN             | 29.21   | 1 |
| gb KP1B.102O17F.050722T7 KP1B Nicotiana tabacum cDNA clone KP1B.102O17, m              | 761.73  | 1 |
| tc Rep: Probable pectate lyase P59 precursor - Solanum lycopersicum (Tomato) (Ly       | 45576.1 | 1 |
| gb KP1B.101O17F.050722T7 KP1B Nicotiana tabacum cDNA clone KP1B.101O17, m              | 22.82   | 1 |
| gb EST_CSP001xo12f1.ab1 EST_CSP Nicotiana tabacum cDNA, mRNA sequence [EH              | 36.51   | 1 |
| Unknown                                                                                | 120.53  | 1 |
| tc Rep: Chromosome chr12 scaffold_47, whole genome shotgun sequence - Vitis vi         | 511.96  | 1 |
| gb AGN_RNC010xm14f1.ab1 AGN_RNC Nicotiana tabacum cDNA 5', mRNA sequen                 | 199.26  | 1 |
| gb AGN_RNC116xo18f1.ab1 AGN_RNC Nicotiana tabacum cDNA 5', mRNA sequenc                | 23.87   | 1 |
| Unknown                                                                                | 58.63   | 1 |
| gb Nicotiana tabacum UDP-glucuronate decarboxylase 1 mRNA, complete cds [AY6           | 685.54  | 1 |
| gb KT7C.104B05F.051219T7 KT7 Nicotiana tabacum cDNA clone KT7C.104B05, mRN             | 80.78   | 1 |
| tc Rep: Diacylglycerol kinase-like protein - Arabidopsis thaliana (Mouse-ear cress), I | 80.49   | 1 |
| Unknown                                                                                | 24.68   | 1 |
| Unknown                                                                                | 4398.04 | 1 |
| Unknown                                                                                | 42.25   | 1 |
| Unknown                                                                                | 1833.69 | 1 |
| tc Rep: Chromosome undetermined scaffold_608, whole genome shotgun sequenc             | 57.88   | 1 |
| Unknown                                                                                | 49.37   | 1 |
| Unknown                                                                                | 101.19  | 1 |
| tc Rep: Chromosome chr16 scaffold_94, whole genome shotgun sequence - Vitis vi         | 170.08  | 1 |
| tc Rep: Os09g0505800 protein - Oryza sativa subsp. japonica (Rice), partial (86%) [T   | 40.28   | 1 |
| gb TT-23_B20 Samsun trichome library Nicotiana tabacum cDNA, mRNA sequence             | 745.65  | 1 |
| gb TT-10_G24 Burley21 trichome library Nicotiana tabacum cDNA, mRNA sequenc            | 9379.51 | 1 |
| Unknown                                                                                | 95.68   | 1 |
| gb AM818948 seedling library, SL Nicotiana tabacum cDNA clone nt002252015, mF          | 514.2   | 1 |
| gb KP1B.111H16F.060116T7 KP1B Nicotiana tabacum cDNA clone KP1B.111H16, m              | 57.99   | 1 |
| Unknown                                                                                | 152.91  | 1 |
| gb KL4B.100M14F.050922T7 KL4B Nicotiana tabacum cDNA clone KL4B.100M14, r              | 72.45   | 1 |

|                                                                                      |         |   |
|--------------------------------------------------------------------------------------|---------|---|
| gb KR2B.103H05F.051227T7 KR2B Nicotiana tabacum cDNA clone KR2B.103H05, m            | 47.99   | 1 |
| tc Rep: 60S ribosomal protein L38 - Solanum lycopersicum (Tomato) (Lycopersicon      | 287.91  | 1 |
| Unknown                                                                              | 286.21  | 1 |
| gb CHO_SL027xb23f1.ab1 CHO_SL Nicotiana tabacum cDNA, mRNA sequence [EH6             | 1600.38 | 1 |
| tc Rep: Chromosome chr3 scaffold_8, whole genome shotgun sequence - Vitis vinif      | 31.41   | 1 |
| gb KN6B.103I10F.060103T7 KN6B Nicotiana tabacum cDNA clone KN6B.103I10, mF           | 431.63  | 1 |
| tc Rep: Chromosome chr5 scaffold_2, whole genome shotgun sequence - Vitis vinif      | 52.56   | 1 |
| Unknown                                                                              | 19.6    | 1 |
| tc Rep: Predicted protein - Physcomitrella patens subsp. patens, partial (93%) [TC54 | 48.55   | 1 |
| Unknown                                                                              | 31.61   | 1 |
| gb KR3B.101E16F.051107T7 KR3B Nicotiana tabacum cDNA clone KR3B.101E16, mI           | 388.77  | 1 |
| Unknown                                                                              | 134.43  | 1 |
| gb AGN_RNC014xf08f1.ab1 AGN_RNC Nicotiana tabacum cDNA 5', mRNA sequenc              | 29.31   | 1 |
| gb AGN_PNL213cf1_g3.trimmed.seq AGN_PNL Nicotiana tabacum cDNA 5', mRNA              | 51.86   | 1 |
| gb KL4B.104H17F.051104T7 KL4B Nicotiana tabacum cDNA clone KL4B.104H17, mF           | 200.59  | 1 |
| gb CHO_SL004xd15f1.ab1 CHO_SL Nicotiana tabacum cDNA, mRNA sequence [EH6             | 31.66   | 1 |
| gb KG9B.001M19F.050628T7 KG9B Nicotiana tabacum cDNA clone KG9B.001M19,              | 35.39   | 1 |
| Unknown                                                                              | 30      | 1 |
| Unknown                                                                              | 79.95   | 1 |
| tc Rep: Chromosome chr5 scaffold_2, whole genome shotgun sequence - Vitis vinif      | 561.16  | 1 |
| Unknown                                                                              | 18.86   | 1 |
| tc Rep: Chromosome undetermined scaffold_69, whole genome shotgun sequence           | 896.24  | 1 |
| Unknown                                                                              | 20.69   | 1 |
| gb CHO_SL001xa19f1.ab1 CHO_SL Nicotiana tabacum cDNA, mRNA sequence [EH6             | 37.91   | 1 |
| gb EST T1P015 Tobacco Leaves Express Library Nicotiana tabacum cDNA clone t1p3       | 25.25   | 1 |
| Unknown                                                                              | 934.07  | 1 |
| gb KL4B.103G13F.051103T7 KL4B Nicotiana tabacum cDNA clone KL4B.103G13, mF           | 1148.75 | 1 |
| tc Rep: Metal transporter - Solanum lycopersicum (Tomato) (Lycopersicon esculent     | 66.8    | 1 |
| tc Rep: Chromosome chr10 scaffold_179, whole genome shotgun sequence - Vitis v       | 16.72   | 1 |
| Unknown                                                                              | 95.7    | 1 |
| Unknown                                                                              | 20.23   | 1 |
| gb KT7B.114H13F.060127T7 KT7 Nicotiana tabacum cDNA clone KT7B.114H13, mR            | 709.89  | 1 |
| gb KG9B.001J02F.050628T7 KG9B Nicotiana tabacum cDNA clone KG9B.001J02, mF           | 18.71   | 1 |
| gb TT-17_O12 Burley21 trichome library Nicotiana tabacum cDNA, mRNA sequenc          | 111.59  | 1 |



|                                                                                             |         |   |
|---------------------------------------------------------------------------------------------|---------|---|
| tc Rep: Chromosome chr1 scaffold_5, whole genome shotgun sequence - Vitis vinifera          | 91.8    | 1 |
| Unknown                                                                                     | 283.17  | 1 |
| gb AGN_RNC018xe23f1.ab1 AGN_RNC Nicotiana tabacum cDNA 5', mRNA sequencing                  | 28.11   | 1 |
| gb AGN_RNC007xd13r1.ab1 AGN_RNC Nicotiana tabacum cDNA 3', mRNA sequencing                  | 35.96   | 1 |
| Unknown                                                                                     | 69.51   | 1 |
| Unknown                                                                                     | 25.46   | 1 |
| Unknown                                                                                     | 1353.1  | 1 |
| gb KT7C.104K01F.051219T7 KT7 Nicotiana tabacum cDNA clone KT7C.104K01, mRNA                 | 8096.84 | 1 |
| tc Rep: Methionine synthase - Nicotiana suaveolens, partial (48%) [TC42734]                 | 11569   | 1 |
| tc Rep: Protein farnesyltransferase/geranylgeranyltransferase type-1 subunit alpha          | 104.13  | 1 |
| gb FS393498 normalized full-length tobacco cDNA library Nicotiana tabacum cDNA              | 57.54   | 1 |
| tc Rep: Ripening regulated protein-like - Solanum tuberosum (Potato), partial (56%)         | 98.51   | 1 |
| gb Nicotiana tabacum sucrose transporter-like protein (SUT3) mRNA, complete cds             | 207.99  | 1 |
| Unknown                                                                                     | 175.95  | 1 |
| tc Rep: Ribosomal protein L24E - Medicago truncatula (Barrel medic), complete [TC42734]     | 1144.73 | 1 |
| tc Rep: Chromosome chr8 scaffold_23, whole genome shotgun sequence - Vitis vinifera         | 275.05  | 1 |
| Unknown                                                                                     | 400.51  | 1 |
| tc Rep: Chromosome chr14 scaffold_21, whole genome shotgun sequence - Vitis vinifera        | 28.28   | 1 |
| gb Nicotiana tabacum NtTOM3 mRNA for tobamovirus multiplication 3, complete cds             | 2904.04 | 1 |
| Unknown                                                                                     | 32.11   | 1 |
| tc Rep: Salt tolerance protein 5-like protein - Solanum tuberosum (Potato), partial (56%)   | 121.41  | 1 |
| gb Nicotiana tabacum GA2ox2 mRNA for gibberellin 2-oxidase 2, complete cds [AB010000]       | 22.2    | 1 |
| tc Rep: Chromosome chr18 scaffold_1, whole genome shotgun sequence - Vitis vinifera         | 4248.78 | 1 |
| tc Rep: Chromosome chr13 scaffold_210, whole genome shotgun sequence - Vitis vinifera       | 1594.83 | 1 |
| Unknown                                                                                     | 196.1   | 1 |
| gb KF8C.109L18F.051215T7 KF8 Nicotiana tabacum cDNA clone KF8C.109L18, mRNA                 | 53.84   | 1 |
| Unknown                                                                                     | 29.21   | 1 |
| tc Rep: Chromosome chr1 scaffold_84, whole genome shotgun sequence - Vitis vinifera         | 77.73   | 1 |
| gb AGN_RNC020xo16f1.ab1 AGN_RNC Nicotiana tabacum cDNA 5', mRNA sequencing                  | 57.63   | 1 |
| tc Rep: 26S protease regulatory subunit 7 - Prunus persica (Peach), partial (34%) [TC42734] | 115.8   | 1 |
| gb KL4B.106D12F.051125T7 KL4B Nicotiana tabacum cDNA clone KL4B.106D12, mRNA                | 528.84  | 1 |
| tc Rep: Chromosome chr5 scaffold_72, whole genome shotgun sequence - Vitis vinifera         | 42.21   | 1 |
| Unknown                                                                                     | 1190.58 | 1 |
| Unknown                                                                                     | 25.88   | 1 |

|                                                                                       |          |   |
|---------------------------------------------------------------------------------------|----------|---|
| Unknown                                                                               | 24.18    | 1 |
| gb KG9B.004H15F.050721T7 KG9B Nicotiana tabacum cDNA clone KG9B.004H15, n             | 64.68    | 1 |
| gb TT-05_D19 Samsun trichome library Nicotiana tabacum cDNA, mRNA sequence            | 825.02   | 1 |
| gb N.tabacum Nelf-4A14 mRNA [X79141]                                                  | 3475.99  | 1 |
| gb KR3B.103F10F.051108T7 KR3B Nicotiana tabacum cDNA clone KR3B.103F10, mf            | 7836.53  | 1 |
| tc Rep: S25-PR6 - Nicotiana tabacum (Common tobacco), partial (98%) [TC47521]         | 37.62    | 1 |
| tc Rep: Avr9 elicitor response protein - Nicotiana tabacum (Common tobacco), part     | 30.83    | 1 |
| tc Rep: T8F5.5 protein - Arabidopsis thaliana (Mouse-ear cress), partial (43%) [TC55  | 201.42   | 1 |
| tc Rep: Chromosome undetermined scaffold_623, whole genome shotgun sequenc            | 456.85   | 1 |
| gb TT-09_J11 Samsun trichome library Nicotiana tabacum cDNA, mRNA sequence [          | 18.43    | 1 |
| Unknown                                                                               | 21.08    | 1 |
| Unknown                                                                               | 2368.7   | 1 |
| tc Rep: Probable pectate lyase P59 precursor - Solanum lycopersicum (Tomato) (Ly      | 21446.2  | 1 |
| tc Rep: Chromosome chr8 scaffold_23, whole genome shotgun sequence - Vitis vin        | 22.35    | 1 |
| Unknown                                                                               | 57.9     | 1 |
| gb KP1B.101N23F.050722T7 KP1B Nicotiana tabacum cDNA clone KP1B.101N23, m             | 44.71    | 1 |
| tc Rep: CDPK - Ipomoea nil (Japanese morning glory) (Pharbitis nil), partial (93%) [T | 127.66   | 1 |
| tc Rep: Chromosome chr17 scaffold_16, whole genome shotgun sequence - Vitis vi        | 1115.05  | 1 |
| gb TT-20_O05 K326 late senescent leaf library Nicotiana tabacum cDNA, mRNA seq        | 292.32   | 1 |
| tc GB AY532658.1 AAS92257.1 putative pyridoxine biosynthesis protein [Nicotian:       | 79.33    | 1 |
| gb TL13.105B12F.060313T7 TL13 Nicotiana tabacum cDNA clone TL13.105B12, mRl           | 16968.15 | 1 |
| gb Nicotiana tabacum NtVPE-1b mRNA for vacuolar processing enzyme-1b complei          | 31.67    | 1 |
| gb AGN_RNC022xo24f1.ab1 AGN_RNC Nicotiana tabacum cDNA 5', mRNA sequenc               | 183.48   | 1 |
| gb KP1B.109P14F.050727T7 KP1B Nicotiana tabacum cDNA clone KP1B.109P14, mf            | 43.71    | 1 |
| tc Rep: Chromosome chr13 scaffold_48, whole genome shotgun sequence - Vitis vi        | 43.91    | 1 |
| gb Nicotiana tabacum Nt-5beta-POR-B mRNA for progesterone 5beta reductase-B,          | 525.2    | 1 |
| tc Rep: Chromosome chr8 scaffold_23, whole genome shotgun sequence - Vitis vin        | 3212.4   | 1 |
| tc Rep: Chromosome chr14 scaffold_9, whole genome shotgun sequence - Vitis vin        | 88.96    | 1 |
| Unknown                                                                               | 24.45    | 1 |
| tc Rep: Chromosome chr9 scaffold_104, whole genome shotgun sequence - Vitis vi        | 73.12    | 1 |
| tc Rep: Chromosome chr11 scaffold_13, whole genome shotgun sequence - Vitis vi        | 25.96    | 1 |
| gb EST_FLW004xb16f1.ab1 EST_FLW Nicotiana tabacum cDNA, mRNA sequence [Ei             | 129.48   | 1 |
| Unknown                                                                               | 184.54   | 1 |
| tc Rep: Chromosome chr5 scaffold_2, whole genome shotgun sequence - Vitis vinif       | 2899.64  | 1 |

|                                                                                           |         |   |
|-------------------------------------------------------------------------------------------|---------|---|
| tc Rep: Chromosome chr4 scaffold_32, whole genome shotgun sequence - Vitis vin            | 533.24  | 1 |
| tc Rep: LEA1-like protein - Capsicum annuum (Bell pepper), partial (97%) [TC51846]        | 21.48   | 1 |
| tc Rep: BRCT domain protein - Neosartorya fischeri (strain ATCC 1020 / DSM 3700 / Unknown | 66.32   | 1 |
|                                                                                           | 113.41  | 1 |
| tc Rep: Chromosome chr5 scaffold_64, whole genome shotgun sequence - Vitis vin            | 1876.24 | 1 |
| tc Rep: Isoform 2 of Q5FBB7 - Homo sapiens (Human), partial (5%) [TC56658]                | 58.33   | 1 |
| gb KP1B.101J08F.050722T7 KP1B Nicotiana tabacum cDNA clone KP1B.101J08, mR                | 186.5   | 1 |
| gb CHO_SL028xk23f1.ab1 CHO_SL Nicotiana tabacum cDNA, mRNA sequence [EH6.                 | 462.88  | 1 |
| gb Nicotiana tabacum mRNA for TATA binding protein (TBP), complete cds [D8672;            | 595.94  | 1 |
| tc Rep: Chromosome chr11 scaffold_13, whole genome shotgun sequence - Vitis vi            | 103.41  | 1 |
| gb KT7C.102F22F.051216T7 KT7 Nicotiana tabacum cDNA clone KT7C.102F22, mRN                | 138.3   | 1 |
| Unknown                                                                                   | 26.52   | 1 |
| tc Rep: AT3g42050/F4M19_10 - Arabidopsis thaliana (Mouse-ear cress), complete             | 486.11  | 1 |
| tc Rep: Chromosome chr7 scaffold_20, whole genome shotgun sequence - Vitis vin            | 134.55  | 1 |
| gb AGN_RNC018xd16f1.ab1 AGN_RNC Nicotiana tabacum cDNA 5', mRNA sequenc                   | 22.46   | 1 |
| gb KP1B.110L05F.050727T7 KP1B Nicotiana tabacum cDNA clone KP1B.110L05, mR                | 16.98   | 1 |
| Unknown                                                                                   | 445.83  | 1 |
| tc Rep: ATP synthase subunit beta - Nicotiana sylvestris (Wood tobacco), partial (26      | 388.92  | 1 |
| gb Nicotiana tabacum cDNA-AFLP-fragment BSTT32-1-320, cultivar Bright Yellow 2            | 47.58   | 1 |
| gb KP1B.037D07F.050628T7 KP1B Nicotiana tabacum cDNA clone KP1B.037D07, m                 | 273.64  | 1 |
| gb Nicotiana tabacum ankyrin-repeat protein HBP1 mRNA, complete cds [AF35279              | 229.07  | 1 |
| gb TT-28_H14 Samsun trichome library Nicotiana tabacum cDNA, mRNA sequence                | 501.79  | 1 |
| Unknown                                                                                   | 704.65  | 1 |
| gb KL5B.111N24F.060117T7 KL5B Nicotiana tabacum cDNA clone KL5B.111N24, mF                | 10227.9 | 1 |
| Unknown                                                                                   | 22.74   | 1 |
| tc Rep: Chromosome chr7 scaffold_20, whole genome shotgun sequence - Vitis vin            | 25.89   | 1 |
| gb AGN_RPC021xh10f1.ab1 AGN_RPC Nicotiana tabacum cDNA 5', mRNA sequenc                   | 4807.83 | 1 |
| tc Rep: Chloride channel protein CLC-d - Arabidopsis thaliana (Mouse-ear cress), pa       | 150.54  | 1 |
| Unknown                                                                                   | 49.18   | 1 |
| gb AGN_PNL208ar1_e6.trimmed.seq AGN_PNL Nicotiana tabacum cDNA 3', mRNA                   | 17.36   | 1 |
| tc Rep: 6-phosphogluconate dehydrogenase, decarboxylating - Vitis vinifera (Grape         | 146.85  | 1 |
| tc Rep: Glutaredoxin related protein - Oryza sativa subsp. indica (Rice), partial (32%    | 104.4   | 1 |
| tc Rep: 40S ribosomal protein S15-like - Solanum tuberosum (Potato), complete [TC         | 87.01   | 1 |
| Unknown                                                                                   | 209.69  | 1 |

|                                                                                       |         |   |
|---------------------------------------------------------------------------------------|---------|---|
| tc Rep: Protein kinase SRK - Nicotiana tabacum (Common tobacco), partial (23%) [T     | 547.2   | 1 |
| tc Rep: Zinc finger, RING-type; Thioredoxin-related - Medicago truncatula (Barrel m   | 63.62   | 1 |
| gb KR3B.112E20F.060119T7 KR3B Nicotiana tabacum cDNA clone KR3B.112E20, mI            | 190.5   | 1 |
| Unknown                                                                               | 47.94   | 1 |
| gb KT7C.105D04F.051219T7 KT7 Nicotiana tabacum cDNA clone KT7C.105D04, mRI            | 987.58  | 1 |
| Unknown                                                                               | 27.47   | 1 |
| Unknown                                                                               | 58.71   | 1 |
| tc Rep: Chromosome chr10 scaffold_81, whole genome shotgun sequence - Vitis vi        | 517.9   | 1 |
| tc Rep: Chromosome chr11 scaffold_177, whole genome shotgun sequence - Vitis v        | 84.08   | 1 |
| gb KL4B.112G15F.060131T7 KL4B Nicotiana tabacum cDNA clone KL4B.112G15, mF            | 57.1    | 1 |
| gb AGN_PNL228df1_c8.trimmed.seq AGN_PNL Nicotiana tabacum cDNA 5', mRNA               | 779.93  | 1 |
| gb EST_FLW004xn20f1.ab1 EST_FLW Nicotiana tabacum cDNA, mRNA sequence [El             | 30.91   | 1 |
| gb FS436591 normalized full-length tobacco cDNA library Nicotiana tabacum cDNA        | 103.89  | 1 |
| gb CHO_SL013xc21f1.ab1 CHO_SL Nicotiana tabacum cDNA, mRNA sequence [EH6:             | 32.68   | 1 |
| tc Rep: Chromosome chr5 scaffold_72, whole genome shotgun sequence - Vitis vin        | 47.03   | 1 |
| Unknown                                                                               | 93.91   | 1 |
| tc Rep: CBL-interacting protein kinase 25 - Populus trichocarpa (Western balsam pc    | 910.11  | 1 |
| tc Rep: Chromosome undetermined scaffold_763, whole genome shotgun sequenc            | 193.18  | 1 |
| gb TT-14_C11 K326 late senescent leaf library Nicotiana tabacum cDNA, mRNA seq        | 80.16   | 1 |
| gb KL4B.111G19F.060128T7 KL4B Nicotiana tabacum cDNA clone KL4B.111G19, mF            | 112.64  | 1 |
| Unknown                                                                               | 475.5   | 1 |
| tc Rep: Salt tolerance protein 5-like protein - Solanum tuberosum (Potato), partial ( | 756.02  | 1 |
| Unknown                                                                               | 31.87   | 1 |
| Unknown                                                                               | 2580.39 | 1 |
| Unknown                                                                               | 28.86   | 1 |
| gb KG9B.105I05F.051128T7 KG9B Nicotiana tabacum cDNA clone KG9B.105I05, mF            | 43.02   | 1 |
| gb Nicotiana tabacum ankyrin-repeat protein HBP1 mRNA, complete cds [AF35279          | 377.42  | 1 |
| gb AGN_PNL215dr1_h5.trimmed.seq AGN_PNL Nicotiana tabacum cDNA 3', mRNA               | 22.41   | 1 |
| tc Rep: Chromosome chr3 scaffold_8, whole genome shotgun sequence - Vitis vinif       | 194.41  | 1 |
| gb Nicotiana tabacum A15 mRNA for hypothetical protein, complete cds [AB03253         | 246.28  | 1 |
| gb KT7C.102K16F.051216T7 KT7 Nicotiana tabacum cDNA clone KT7C.102K16, mRI            | 61.68   | 1 |
| gb KL4B.105B08F.051104T7 KL4B Nicotiana tabacum cDNA clone KL4B.105B08, mR            | 1218.9  | 1 |
| Unknown                                                                               | 18.87   | 1 |
| Unknown                                                                               | 3295.61 | 1 |

|                                                                                 |          |   |
|---------------------------------------------------------------------------------|----------|---|
| tc Rep: Genomic DNA, chromosome 3, P1 clone: MUO10 - Arabidopsis thaliana (Mc   | 59.11    | 1 |
| gb Nicotiana tabacum mRNA for FtsZ-like chloroplast protein [AJ133453]          | 81.59    | 1 |
| Unknown                                                                         | 39.86    | 1 |
| gb KT7C.105J02F.051219T7 KT7 Nicotiana tabacum cDNA clone KT7C.105J02, mRN      | 29.94    | 1 |
| gb KL4B.104C03F.051104T7 KL4B Nicotiana tabacum cDNA clone KL4B.104C03, mR      | 171.52   | 1 |
| gb KR3B.110C13F.051111T7 KR3B Nicotiana tabacum cDNA clone KR3B.110C13, m       | 1599.77  | 1 |
| gb TT-10_I04 Samsun trichome library Nicotiana tabacum cDNA, mRNA sequence [    | 17.33    | 1 |
| tc Rep: Chromosome chr1 scaffold_5, whole genome shotgun sequence - Vitis vinif | 62.3     | 1 |
| tc Rep: Chromosome chr15 scaffold_40, whole genome shotgun sequence - Vitis vi  | 21.55    | 1 |
| gb KN6B.104I06F.060103T7 KN6B Nicotiana tabacum cDNA clone KN6B.104I06, mF      | 26.99    | 1 |
| gb KG9B.102C13F.051126T7 KG9B Nicotiana tabacum cDNA clone KG9B.102C13, r       | 4190.3   | 1 |
| tc Rep: Ribosomal protein L15 - Vitis vinifera (Grape), partial (60%) [TC52772] | 456.63   | 1 |
| tc Rep: NADH:ubiquinone oxidoreductase-like - Solanum tuberosum (Potato), com   | 803.56   | 1 |
| Unknown                                                                         | 500.17   | 1 |
| gb KG9B.001F13F.050628T7 KG9B Nicotiana tabacum cDNA clone KG9B.001F13, m       | 389.01   | 1 |
| gb AGN_ELP024xn09f1.ab1 AGN_ELP Nicotiana tabacum cDNA 5', mRNA sequence        | 85.89    | 1 |
| Unknown                                                                         | 29.18    | 1 |
| gb KR3B.112F15F.060119T7 KR3B Nicotiana tabacum cDNA clone KR3B.112F15, mF      | 142.66   | 1 |
| tc Rep: Chromosome chr18 scaffold_61, whole genome shotgun sequence - Vitis vi  | 378.68   | 1 |
| Unknown                                                                         | 288.73   | 1 |
| gb KN6B.105M14F.060104T7 KN6B Nicotiana tabacum cDNA clone KN6B.105M14,         | 431.11   | 1 |
| Unknown                                                                         | 1505.89  | 1 |
| Unknown                                                                         | 72.77    | 1 |
| gb KF8C.108I23F.051215T7 KF8 Nicotiana tabacum cDNA clone KF8C.108I23, mRN      | 7148.89  | 1 |
| gb KR2B.108F04F.051229T7 KR2B Nicotiana tabacum cDNA clone KR2B.108F04, mF      | 940.28   | 1 |
| Unknown                                                                         | 1028.97  | 1 |
| gb AM808565 seedling library, SL Nicotiana tabacum cDNA clone nt002221007, mF   | 47.68    | 1 |
| Unknown                                                                         | 114.73   | 1 |
| gb FS412600 normalized full-length tobacco cDNA library Nicotiana tabacum cDNA  | 1635.69  | 1 |
| gb AGN_ELP012xf07f1.ab1 AGN_ELP Nicotiana tabacum cDNA 5', mRNA sequence        | 498.76   | 1 |
| Unknown                                                                         | 14660.95 | 1 |
| Unknown                                                                         | 44.84    | 1 |
| tc Rep: Mitogen-activated protein kinase - Solanum lycopersicum (Tomato) (Lycop | 22.83    | 1 |
| tc Rep: Chromosome chr5 scaffold_64, whole genome shotgun sequence - Vitis vin  | 106.78   | 1 |

|                                                                                      |          |   |
|--------------------------------------------------------------------------------------|----------|---|
| gb TT-48_A24 Samsun trichome library Nicotiana tabacum cDNA, mRNA sequence           | 103.75   | 1 |
| Unknown                                                                              | 2916.71  | 1 |
| tc Rep: Chromosome chr7 scaffold_44, whole genome shotgun sequence - Vitis vin       | 183.25   | 1 |
| Unknown                                                                              | 193.48   | 1 |
| tc Rep: Vacuolar proton pump subunit F - Corchorus olitorius, complete [TC50244]     | 10813.15 | 1 |
| gb AGN_RNC021xa02f1.ab1 AGN_RNC Nicotiana tabacum cDNA 5', mRNA sequenc              | 137.94   | 1 |
| Unknown                                                                              | 1048.11  | 1 |
| Unknown                                                                              | 10870.2  | 1 |
| gb KP1B.110N05F.050727T7 KP1B Nicotiana tabacum cDNA clone KP1B.110N05, m            | 687.17   | 1 |
| tc Rep: Heat shock protein 83 - Ipomoea nil (Japanese morning glory) (Pharbitis nil) | 120.21   | 1 |
| tc Rep: Chromosome chr1 scaffold_46, whole genome shotgun sequence - Vitis vin       | 731.37   | 1 |
| tc Rep: Chromosome chr6 scaffold_3, whole genome shotgun sequence - Vitis vinif      | 291.9    | 1 |
| tc Rep: Chromosome chr7 scaffold_20, whole genome shotgun sequence - Vitis vin       | 120      | 1 |
| tc Rep: Malate dehydrogenase - Solanum tuberosum (Potato), partial (46%) [TC430      | 511.43   | 1 |
| Unknown                                                                              | 154.46   | 1 |
| tc Rep: Chloroplast small heat shock protein class I - Capsicum frutescens (Cayenne  | 747.85   | 1 |
| gb AM791968 DL, diurnal library Nicotiana tabacum cDNA clone nt005134088, mRI        | 24.42    | 1 |
| tc Rep: Chromosome chr7 scaffold_20, whole genome shotgun sequence - Vitis vin       | 55.07    | 1 |
| gb Nicotiana tabacum chloroplast carbonic anhydrase gene, complete cds [M94135       | 8190.35  | 1 |
| gb KG9B.004J17F.050721T7 KG9B Nicotiana tabacum cDNA clone KG9B.004J17, mF           | 50.26    | 1 |
| tc Rep: Chromosome chr9 scaffold_104, whole genome shotgun sequence - Vitis vi       | 183.46   | 1 |
| tc Rep: Chromosome chr18 scaffold_1, whole genome shotgun sequence - Vitis vin       | 32.43    | 1 |
| Unknown                                                                              | 807.38   | 1 |
| Unknown                                                                              | 25.43    | 1 |
| Unknown                                                                              | 179.81   | 1 |
| tc Rep: Chromosome chr13 scaffold_48, whole genome shotgun sequence - Vitis vi       | 277.57   | 1 |
| gb KR2B.110K09F.051229T7 KR2B Nicotiana tabacum cDNA clone KR2B.110K09, mI           | 29.15    | 1 |
| gb KF8B.200I19F.060120T7 KF8 Nicotiana tabacum cDNA clone KF8B.200I19, mRN/          | 219.89   | 1 |
| gb KP1B.104N15F.050725T7 KP1B Nicotiana tabacum cDNA clone KP1B.104N15, m            | 562.1    | 1 |
| gb KL4B.105A02F.051104T7 KL4B Nicotiana tabacum cDNA clone KL4B.105A02, mF           | 82.92    | 1 |
| tc Rep: Chromosome chr5 scaffold_67, whole genome shotgun sequence - Vitis vin       | 56.76    | 1 |
| gb KR3B.105A04F.051109T7 KR3B Nicotiana tabacum cDNA clone KR3B.105A04, m            | 509.3    | 1 |
| tc Rep: Chromosome chr13 scaffold_210, whole genome shotgun sequence - Vitis v       | 227.72   | 1 |
| Unknown                                                                              | 71.08    | 1 |

|                                                                                                     |          |   |
|-----------------------------------------------------------------------------------------------------|----------|---|
| tc Rep: Expressed protein - <i>Oryza sativa</i> subsp. <i>japonica</i> (Rice), partial (7%) [TC6733 | 250.97   | 1 |
| Unknown                                                                                             | 111.96   | 1 |
| gb AGN_ELP025xj05f1.ab1 AGN_ELP <i>Nicotiana tabacum</i> cDNA 5', mRNA sequence                     | 8161.18  | 1 |
| gb  <i>Nicotiana tabacum</i> clone PR51 mRNA sequence [AF154660]                                    | 2783.87  | 1 |
| tc Rep: Chromosome chr15 scaffold_37, whole genome shotgun sequence - <i>Vitis vi</i>               | 20.95    | 1 |
| tc Rep: Microsomal omega-6-desaturase - <i>Nicotiana tabacum</i> (Common tobacco), p                | 20650.35 | 1 |
| gb TT-03_J06 K326 late senescent leaf library <i>Nicotiana tabacum</i> cDNA, mRNA sequ              | 27.5     | 1 |
| tc Rep: Short-chain dehydrogenase Tic32 - <i>Pisum sativum</i> (Garden pea), partial (23'           | 41.69    | 1 |
| gb KN6B.009J12F.050901T7 KN6B <i>Nicotiana tabacum</i> cDNA clone KN6B.009J12, mF                   | 19.12    | 1 |
| Unknown                                                                                             | 950.9    | 1 |
| tc Rep: Small subunit ribosomal protein - <i>Berberis thunbergii</i> (Japanese barberry), f         | 926.53   | 1 |
| gb KP1B.001B10F.050628T7 KP1B <i>Nicotiana tabacum</i> cDNA clone KP1B.001B10, mI                   | 1183.53  | 1 |
| gb KR3B.109G03F.051111T7 KR3B <i>Nicotiana tabacum</i> cDNA clone KR3B.109G03, m                    | 132.83   | 1 |
| tc Rep: Small GTP-binding protein Sar1BNt - <i>Nicotiana tabacum</i> (Common tobacco)               | 3908.71  | 1 |
| Unknown                                                                                             | 18.02    | 1 |
| Unknown                                                                                             | 1040.58  | 1 |
| gb KG9B.103C09F.051128T7 KG9B <i>Nicotiana tabacum</i> cDNA clone KG9B.103C09, m                    | 72.79    | 1 |
| tc Rep: Chromosome undetermined scaffold_134, whole genome shotgun sequenc                          | 46.05    | 1 |
| tc Rep: Chromosome chr6 scaffold_3, whole genome shotgun sequence - <i>Vitis vinif</i>              | 3344.87  | 1 |
| gb AGN_RNC020xk07f1.ab1 AGN_RNC <i>Nicotiana tabacum</i> cDNA 5', mRNA sequenc                      | 17.5     | 1 |
| tc Rep: Chromosome chr8 scaffold_34, whole genome shotgun sequence - <i>Vitis vin</i>               | 77.63    | 1 |
| tc Rep: Calnexin-like protein - <i>Solanum lycopersicum</i> (Tomato) ( <i>Lycopersicon esculi</i>   | 697.07   | 1 |
| gb KL4B.105D03F.051104T7 KL4B <i>Nicotiana tabacum</i> cDNA clone KL4B.105D03, mF                   | 9508.01  | 1 |
| tc Rep: Chromosome chr18 scaffold_1, whole genome shotgun sequence - <i>Vitis vin</i>               | 17.89    | 1 |
| gb KL4B.111P09F.060128T7 KL4B <i>Nicotiana tabacum</i> cDNA clone KL4B.111P09, mR                   | 76.32    | 1 |
| gb EST_FLW002xd24f1.ab1 EST_FLW <i>Nicotiana tabacum</i> cDNA, mRNA sequence [El                    | 394.42   | 1 |
| tc Rep: Chromosome chr10 scaffold_81, whole genome shotgun sequence - <i>Vitis vi</i>               | 2848.14  | 1 |
| tc Rep: Chromosome chr3 scaffold_8, whole genome shotgun sequence - <i>Vitis vinif</i>              | 176.58   | 1 |
| tc Rep: Chromosome chr18 scaffold_1, whole genome shotgun sequence - <i>Vitis vin</i>               | 187.24   | 1 |
| Unknown                                                                                             | 26759.2  | 1 |
| tc Rep: S-adenosylmethionine synthetase 2 - <i>Solanum lycopersicum</i> (Tomato) (Lyc               | 228.01   | 1 |
| Unknown                                                                                             | 120.5    | 1 |
| gb AGN_RNC127xj12f1.ab1 AGN_RNC <i>Nicotiana tabacum</i> cDNA 5', mRNA sequenc                      | 38.66    | 1 |
| tc Rep: Chromosome chr17 scaffold_12, whole genome shotgun sequence - <i>Vitis vi</i>               | 3599.62  | 1 |

|                                                                                   |          |   |
|-----------------------------------------------------------------------------------|----------|---|
| Unknown                                                                           | 90.44    | 1 |
| gb KG9B.104C04F.060120T7 KG9B Nicotiana tabacum cDNA clone KG9B.104C04, r         | 980.48   | 1 |
| tc Rep: 3-hydroxy-3-methylglutaryl coenzyme A synthase - Solanum lycopersicum (   | 1774.46  | 1 |
| tc Rep: Chromosome chr12 scaffold_36, whole genome shotgun sequence - Vitis vi    | 1179.26  | 1 |
| Unknown                                                                           | 84.74    | 1 |
| gb AGN_RNC128xg02f1.ab1 AGN_RNC Nicotiana tabacum cDNA 5', mRNA sequenc           | 72.24    | 1 |
| tc Rep: Chromosome chr16 scaffold_189, whole genome shotgun sequence - Vitis v    | 48.19    | 1 |
| gb Nicotiana tabacum phosphoinositide-specific phospholipase C mRNA, complete     | 19.11    | 1 |
| Unknown                                                                           | 750.89   | 1 |
| gb KL4B.102I08F.051125T7 KL4B Nicotiana tabacum cDNA clone KL4B.102I08, mRN       | 64.25    | 1 |
| gb TT-03_H09 K326 trichome library Nicotiana tabacum cDNA, mRNA sequence [FC      | 130.56   | 1 |
| gb KN6B.109A10F.060106T7 KN6B Nicotiana tabacum cDNA clone KN6B.109A10, n         | 385.37   | 1 |
| Unknown                                                                           | 157.07   | 1 |
| gb N.tabacum mRNA for pyruvate kinase [Z29492]                                    | 157.98   | 1 |
| gb KP1B.107M10F.050726T7 KP1B Nicotiana tabacum cDNA clone KP1B.107M10, r         | 39.39    | 1 |
| gb KP1B.105I23F.060116T7 KP1B Nicotiana tabacum cDNA clone KP1B.105I23, mRI       | 319.3    | 1 |
| tc Rep: Vacuolar ATP synthase 16 kDa proteolipid subunit - Nicotiana tabacum (Cor | 11127.05 | 1 |
| tc Rep: Chromosome chr8 scaffold_34, whole genome shotgun sequence - Vitis vin    | 181.61   | 1 |
| tc Rep: Pollen specific actin-depolymerizing factor 2 - Nicotiana tabacum (Common | 38105.3  | 1 |
| tc Rep: Chromosome chr15 scaffold_40, whole genome shotgun sequence - Vitis vi    | 380.76   | 1 |
| tc Rep: Lon protease homolog - Vitis vinifera (Grape), partial (48%) [TC45253]    | 47.05    | 1 |
| tc Rep: ADP-ribosylation factor - Daucus carota (Carrot), complete [TC50475]      | 247.68   | 1 |
| tc Rep: Cytochrome b-c1 complex subunit 7 - Solanum tuberosum (Potato), comple    | 5208.68  | 1 |
| gb N.tabacum mRNA for inorganic pyrophosphatase (TVP9 clone) [X83730]             | 209.15   | 1 |
| Unknown                                                                           | 273.61   | 1 |
| gb KL5B.104D12F.060207T7 KL5B Nicotiana tabacum cDNA clone KL5B.104D12, mF        | 51.94    | 1 |
| tc Rep: Chromosome chr8 scaffold_115, whole genome shotgun sequence - Vitis vi    | 191.81   | 1 |
| Unknown                                                                           | 192.49   | 1 |
| Unknown                                                                           | 399.98   | 1 |
| Unknown                                                                           | 1145.38  | 1 |
| gb FS383836 normalized full-length tobacco cDNA library Nicotiana tabacum cDNA    | 1054.45  | 1 |
| gb TT-37_H10 Burley21 trichome library Nicotiana tabacum cDNA, mRNA sequence      | 121.29   | 1 |
| Unknown                                                                           | 77.24    | 1 |
| Unknown                                                                           | 542.72   | 1 |



|                                                                                    |          |   |
|------------------------------------------------------------------------------------|----------|---|
| tc Rep: Chromosome chr7 scaffold_31, whole genome shotgun sequence - Vitis vin     | 193.58   | 1 |
| Unknown                                                                            | 126.61   | 1 |
| tc Rep: CCR4 associated factor 1-related protein - Capsicum annuum (Bell pepper),  | 102.84   | 1 |
| tc Rep: Chromosome chr17 scaffold_12, whole genome shotgun sequence - Vitis vi     | 6083.03  | 1 |
| gb AGN_ELP022xf13f1.ab1 AGN_ELP Nicotiana tabacum cDNA 5', mRNA sequence           | 24.18    | 1 |
| gb KP1B.101G15F.050722T7 KP1B Nicotiana tabacum cDNA clone KP1B.101G15, m          | 36.22    | 1 |
| gb AGN_ELP019xd01f1.ab1 AGN_ELP Nicotiana tabacum cDNA 5', mRNA sequence           | 883.7    | 1 |
| gb KP1B.101E24F.050722T7 KP1B Nicotiana tabacum cDNA clone KP1B.101E24, m          | 62.84    | 1 |
| tc Rep: Chromosome chr7 scaffold_42, whole genome shotgun sequence - Vitis vin     | 26.05    | 1 |
| Unknown                                                                            | 20.06    | 1 |
| Unknown                                                                            | 264      | 1 |
| Unknown                                                                            | 7869.44  | 1 |
| Unknown                                                                            | 43.21    | 1 |
| gb Nicotiana tabacum hexokinase 1a (Hxk1a) mRNA, complete cds [AY553214]           | 3068.37  | 1 |
| tc GB AB053091.1 BAB40702.1 kinesin-like polypeptides 3 [Nicotiana tabacum] [N     | 44.03    | 1 |
| tc Rep: Chromosome chr2 scaffold_132, whole genome shotgun sequence - Vitis vi     | 61.97    | 1 |
| tc Rep: Chromosome chr15 scaffold_37, whole genome shotgun sequence - Vitis vi     | 90.33    | 1 |
| gb KF8B.201P07F.060124T7 KF8 Nicotiana tabacum cDNA clone KF8B.201P07, mRN         | 255.51   | 1 |
| gb KN6B.102M01F.051230T7 KN6B Nicotiana tabacum cDNA clone KN6B.102M01,            | 36295.25 | 1 |
| gb KG9B.002K10F.050720T7 KG9B Nicotiana tabacum cDNA clone KG9B.002K10, m          | 26.47    | 1 |
| Unknown                                                                            | 29       | 1 |
| tc Rep: Chromosome chr5 scaffold_64, whole genome shotgun sequence - Vitis vin     | 17.43    | 1 |
| gb FS379071 normalized full-length tobacco cDNA library Nicotiana tabacum cDNA     | 71.02    | 1 |
| gb TL13.106A20F.060315T7 TL13 Nicotiana tabacum cDNA clone TL13.106A20, mRN        | 34.84    | 1 |
| tc Rep: Methionine synthase - Nicotiana suaveolens, partial (36%) [TC40848]        | 18920.85 | 1 |
| tc Rep: Chromosome chr9 scaffold_7, whole genome shotgun sequence - Vitis vinif    | 67.57    | 1 |
| tc Rep: 60S ribosomal protein L24 - Cicer arietinum (Chickpea) (Garbanzo), complet | 56.7     | 1 |
| gb AGN_ELP012xi11f1.ab1 AGN_ELP Nicotiana tabacum cDNA 5', mRNA sequence           | 38.81    | 1 |
| gb KR3B.113A02F.060119T7 KR3B Nicotiana tabacum cDNA clone KR3B.113A02, m          | 2898.29  | 1 |
| gb BP532939 MAT005 Nicotiana tabacum cDNA clone BY28373, mRNA sequence [E          | 73.09    | 1 |
| gb TT-25_004 Burley21 trichome library Nicotiana tabacum cDNA, mRNA sequence       | 254.36   | 1 |
| tc Rep: Chromosome chr6 scaffold_15, whole genome shotgun sequence - Vitis vin     | 2443.18  | 1 |
| Unknown                                                                            | 31.67    | 1 |
| gb AGN_RNC020xe06f1.ab1 AGN_RNC Nicotiana tabacum cDNA 5', mRNA sequenc            | 53.44    | 1 |

|                                                                                      |         |   |
|--------------------------------------------------------------------------------------|---------|---|
| gb KL4B.108H20F.051105T7 KL4B Nicotiana tabacum cDNA clone KL4B.108H20, mF           | 107.04  | 1 |
| tc Rep: Cytosolic ascorbate peroxidase - Nicotiana tabacum (Common tobacco), pa      | 1102.44 | 1 |
| gb AGN_RPC009xg19f1.ab1 AGN_RPC Nicotiana tabacum cDNA 5', mRNA sequence             | 29.69   | 1 |
| gb TT-11_J07 K326 early senescent leaf library Nicotiana tabacum cDNA, mRNA sec      | 24.82   | 1 |
| Unknown                                                                              | 246.76  | 1 |
| gb KF8B.100H08F.151010T7 KF8 Nicotiana tabacum cDNA clone KF8B.100H08, mRI           | 32.57   | 1 |
| gb TT-22_K08 Samsun trichome library Nicotiana tabacum cDNA, mRNA sequence           | 3722.18 | 1 |
| tc Rep: Chromosome chr10 scaffold_81, whole genome shotgun sequence - Vitis vi       | 573.64  | 1 |
| gb TT-04_G22 Burley21 trichome library Nicotiana tabacum cDNA, mRNA sequence         | 532.96  | 1 |
| Unknown                                                                              | 265.75  | 1 |
| gb KG9B.103D21F.051128T7 KG9B Nicotiana tabacum cDNA clone KG9B.103D21, n            | 53.76   | 1 |
| gb Nicotiana tabacum cDNA-AFLP-fragment BSTC1-32-280, cultivar Bright Yellow 2       | 3317.27 | 1 |
| gb TT-06_L13 Samsun trichome library Nicotiana tabacum cDNA, mRNA sequence           | 196.64  | 1 |
| Unknown                                                                              | 49.22   | 1 |
| tc Rep: Chromosome chr2 scaffold_187, whole genome shotgun sequence - Vitis vi       | 143.63  | 1 |
| gb N.tabacum mRNA for TAF-3 [Z48603]                                                 | 28.83   | 1 |
| gb KG9B.102L23F.051126T7 KG9B Nicotiana tabacum cDNA clone KG9B.102L23, m            | 523.65  | 1 |
| tc Rep: Chromosome chr1 scaffold_5, whole genome shotgun sequence - Vitis vinif      | 503.47  | 1 |
| tc Rep: 14-3-3 protein - Nicotiana tabacum (Common tobacco), complete [TC40281       | 362.04  | 1 |
| tc Rep: Reversibly glycosylated protein - Phaseolus vulgaris (Kidney bean) (French b | 5475.97 | 1 |
| Unknown                                                                              | 32.38   | 1 |
| Unknown                                                                              | 67.76   | 1 |
| Unknown                                                                              | 548.83  | 1 |
| Unknown                                                                              | 35.89   | 1 |
| gb TT-24_K09 Burley21 trichome library Nicotiana tabacum cDNA, mRNA sequence         | 2058.26 | 1 |
| Unknown                                                                              | 158.96  | 1 |
| gb KR2B.002L05F.051019T7 KR2B Nicotiana tabacum cDNA clone KR2B.002L05, mF           | 421.81  | 1 |
| tc Rep: Chromosome chr1 scaffold_75, whole genome shotgun sequence - Vitis vin       | 90.88   | 1 |
| tc Rep: Calcium homeostasis regulator CHoR1 - Solanum tuberosum (Potato), parti      | 164.5   | 1 |
| Unknown                                                                              | 22.76   | 1 |
| Unknown                                                                              | 221.97  | 1 |
| Unknown                                                                              | 310.95  | 1 |
| gb KP1B.103D12F.050725T7 KP1B Nicotiana tabacum cDNA clone KP1B.103D12, m            | 239.92  | 1 |
| gb AM803681 DL, diurnal library Nicotiana tabacum cDNA clone nt005177068, mRI        | 75429.7 | 1 |

|                                                                                                     |         |   |
|-----------------------------------------------------------------------------------------------------|---------|---|
| tc Rep: Chromosome chr6 scaffold_3, whole genome shotgun sequence - Vitis vinifera                  | 515.8   | 1 |
| Unknown                                                                                             | 24.01   | 1 |
| tc Rep: Ribosomal protein L11-like - Nicotiana tabacum (Common tobacco), complete                   | 189.83  | 1 |
| tc Rep: 40S ribosomal protein S4 - Solanum tuberosum (Potato), complete [TC4076]                    | 32.07   | 1 |
| gb KL4B.110M08F.051106T7 KL4B Nicotiana tabacum cDNA clone KL4B.110M08, mRNA                        | 798.82  | 1 |
| Unknown                                                                                             | 7073    | 1 |
| tc Rep: Chromosome chr18 scaffold_1, whole genome shotgun sequence - Vitis vinifera                 | 192.66  | 1 |
| gb KT7C.110B17F.051221T7 KT7 Nicotiana tabacum cDNA clone KT7C.110B17, mRNA                         | 166.65  | 1 |
| tc Rep: Chromosome chr8 scaffold_106, whole genome shotgun sequence - Vitis vinifera                | 1590.65 | 1 |
| tc Rep: Dihydrolipoyllysine-residue acetyltransferase component 3 of pyruvate dehydrogenase complex | 2741.87 | 1 |
| tc Rep: 14-3-3 protein - Nicotiana tabacum (Common tobacco), partial (77%) [TC43]                   | 525.93  | 1 |
| tc Rep: double-stranded DNA-binding family protein - Arabidopsis thaliana, partial                  | 479.5   | 1 |
| tc Rep: Mal d 1-associated protein - Malus domestica (Apple) (Malus sylvestris), partial            | 37.7    | 1 |
| tc Rep: Chromosome chr12 scaffold_18, whole genome shotgun sequence - Vitis vinifera                | 31.9    | 1 |
| Unknown                                                                                             | 27.71   | 1 |
| gb AGN_RNC016xa18f1.ab1 AGN_RNC Nicotiana tabacum cDNA 5', mRNA sequencing                          | 26.18   | 1 |
| Unknown                                                                                             | 272.83  | 1 |
| gb KG9B.002A13F.050720T7 KG9B Nicotiana tabacum cDNA clone KG9B.002A13, mRNA                        | 81.86   | 1 |
| gb KN6B.109M18F.060106T7 KN6B Nicotiana tabacum cDNA clone KN6B.109M18, mRNA                        | 115.8   | 1 |
| Unknown                                                                                             | 19.11   | 1 |
| gb KT7C.102J04F.051216T7 KT7 Nicotiana tabacum cDNA clone KT7C.102J04, mRNA                         | 40.66   | 1 |
| gb AGN_PNL228cf1_e8.trimmed.seq AGN_PNL Nicotiana tabacum cDNA 5', mRNA sequencing                  | 30.13   | 1 |
| Unknown                                                                                             | 81.79   | 1 |
| gb KR3B.103F10F.051108T7 KR3B Nicotiana tabacum cDNA clone KR3B.103F10, mRNA                        | 3772.02 | 1 |
| tc Rep: Cytochrome c oxidase polypeptide Vc-2 - Arabidopsis thaliana (Mouse-ear cress)              | 1017.91 | 1 |
| gb KG9B.005H19F.050721T7 KG9B Nicotiana tabacum cDNA clone KG9B.005H19, mRNA                        | 910.87  | 1 |
| tc Rep: Serine hydroxymethyltransferase - Populus tremuloides (Quaking aspen), partial              | 4358.03 | 1 |
| Unknown                                                                                             | 26.72   | 1 |
| tc Rep: Chromosome chr8 scaffold_88, whole genome shotgun sequence - Vitis vinifera                 | 135.09  | 1 |
| Unknown                                                                                             | 188.85  | 1 |
| gb AGN_RNC005xe02f1.ab1 AGN_RNC Nicotiana tabacum cDNA 5', mRNA sequencing                          | 46.24   | 1 |
| Unknown                                                                                             | 22.43   | 1 |
| Unknown                                                                                             | 5868.24 | 1 |
| Unknown                                                                                             | 38.56   | 1 |

|                                                                                      |          |   |
|--------------------------------------------------------------------------------------|----------|---|
| Unknown                                                                              | 25.11    | 1 |
| Unknown                                                                              | 53640.45 | 1 |
| tc Rep: Dihydrolipoamide dehydrogenase precursor - Solanum tuberosum (Potato),       | 1574.1   | 1 |
| gb AGN_RNC105xi18f1.ab1 AGN_RNC Nicotiana tabacum cDNA 5', mRNA sequence             | 36.52    | 1 |
| tc Rep: Sugar transport protein 10 - Arabidopsis thaliana (Mouse-ear cress), partial | 54020.75 | 1 |
| tc Rep: At5g22480 - Arabidopsis thaliana (Mouse-ear cress), partial (35%) [TC50117   | 41.3     | 1 |
| gb KF8C.106A01F.051215T7 KF8 Nicotiana tabacum cDNA clone KF8C.106A01, mRNA          | 272.3    | 1 |
| Unknown                                                                              | 508.48   | 1 |
| Unknown                                                                              | 90.8     | 1 |
| Unknown                                                                              | 19321.95 | 1 |
| gb CHO_SL014xg24f1.ab1 CHO_SL Nicotiana tabacum cDNA, mRNA sequence [EH6             | 28.4     | 1 |
| gb KP1B.107J12F.050726T7 KP1B Nicotiana tabacum cDNA clone KP1B.107J12, mRNA         | 104.02   | 1 |
| tc Rep: Chromosome chr18 scaffold_1, whole genome shotgun sequence - Vitis vin       | 347.32   | 1 |
| gb AGN_RPC014xd06f1.ab1 AGN_RPC Nicotiana tabacum cDNA 5', mRNA sequence             | 25.89    | 1 |
| gb KP1B.102P18F.050722T7 KP1B Nicotiana tabacum cDNA clone KP1B.102P18, mRNA         | 355.66   | 1 |
| Unknown                                                                              | 22.22    | 1 |
| Unknown                                                                              | 26.5     | 1 |
| tc Rep: Chromosome chr1 scaffold_5, whole genome shotgun sequence - Vitis vinif      | 53.45    | 1 |
| gb KG9B.106K08F.051129T7 KG9B Nicotiana tabacum cDNA clone KG9B.106K08, mRNA         | 91.33    | 1 |
| tc Rep: Chromosome undetermined scaffold_127, whole genome shotgun sequenc           | 44.8     | 1 |
| gb KF8B.200B01F.060120T7 KF8 Nicotiana tabacum cDNA clone KF8B.200B01, mRNA          | 61.89    | 1 |
| Unknown                                                                              | 53.62    | 1 |
| tc Rep: Chromosome chr18 scaffold_1, whole genome shotgun sequence - Vitis vin       | 10512.85 | 1 |
| Unknown                                                                              | 237.08   | 1 |
| Unknown                                                                              | 178.37   | 1 |
| gb KL4B.101H15F.051103T7 KL4B Nicotiana tabacum cDNA clone KL4B.101H15, mRNA         | 49.57    | 1 |
| tc Rep: CONSTANS interacting protein 6 - Solanum lycopersicum (Tomato) (Lycoper      | 20.82    | 1 |
| tc Rep: Serine/threonine-protein phosphatase PP2A catalytic subunit - Nicotiana ta   | 438.34   | 1 |
| Unknown                                                                              | 8227.04  | 1 |
| tc Rep: Chromosome chr13 scaffold_17, whole genome shotgun sequence - Vitis vi       | 78.76    | 1 |
| gb KP1B.107L17F.050726T7 KP1B Nicotiana tabacum cDNA clone KP1B.107L17, mRNA         | 22.78    | 1 |
| gb BP530524 MAT005 Nicotiana tabacum cDNA clone BY22160, mRNA sequence [E            | 32.02    | 1 |
| Unknown                                                                              | 999.98   | 1 |
| gb CHO_SL011xl02f1.ab1 CHO_SL Nicotiana tabacum cDNA, mRNA sequence [EH61            | 930.15   | 1 |

|                                                                                      |          |   |
|--------------------------------------------------------------------------------------|----------|---|
| Unknown                                                                              | 20.93    | 1 |
| tc Rep: Chromosome chr14 scaffold_211, whole genome shotgun sequence - Vitis v       | 140.18   | 1 |
| tc Rep: Chromosome chr8 scaffold_34, whole genome shotgun sequence - Vitis vin       | 20.04    | 1 |
| gb KL4B.102A16F.051125T7 KL4B Nicotiana tabacum cDNA clone KL4B.102A16, mF           | 10615.15 | 1 |
| tc Rep: Chromosome chr2 scaffold_11, whole genome shotgun sequence - Vitis vin       | 48.17    | 1 |
| tc Rep: PilT protein domain protein - Mycobacterium sp. (strain KMS), partial (9%) [ | 41.2     | 1 |
| Unknown                                                                              | 250.22   | 1 |
| Unknown                                                                              | 20.8     | 1 |
| Unknown                                                                              | 56.15    | 1 |
| gb KN6B.102E13F.051230T7 KN6B Nicotiana tabacum cDNA clone KN6B.102E13, m            | 132.48   | 1 |
| Unknown                                                                              | 87.18    | 1 |
| Unknown                                                                              | 230.57   | 1 |
| tc Rep: Chromosome chr8 scaffold_29, whole genome shotgun sequence - Vitis vin       | 197.1    | 1 |
| gb AGN_RPC022xe13f1.ab1 AGN_RPC Nicotiana tabacum cDNA 5', mRNA sequenc              | 10620.75 | 1 |
| gb TT-22_M06 Burley21 trichome library Nicotiana tabacum cDNA, mRNA sequenc          | 437.2    | 1 |
| tc Rep: Histone H4 [Contains: Osteogenic growth peptide (OGP)]. - Rattus norvegici   | 484.67   | 1 |
| gb KL4B.103C02F.051103T7 KL4B Nicotiana tabacum cDNA clone KL4B.103C02, mR           | 917.96   | 1 |
| Unknown                                                                              | 516.67   | 1 |
| gb AGN_RNC002xo09f1.ab1 AGN_RNC Nicotiana tabacum cDNA 5', mRNA sequenc              | 31.5     | 1 |
| gb KL5B.115M12F.060217T7 KL5B Nicotiana tabacum cDNA clone KL5B.115M12, r            | 29.35    | 1 |
| gb Nicotiana tabacum cig2 mRNA, complete cds [AB031321]                              | 105.04   | 1 |
| gb KN6B.113E10F.060127T7 KN6B Nicotiana tabacum cDNA clone KN6B.113E10, m            | 67.25    | 1 |
| gb KL4B.105M02F.051104T7 KL4B Nicotiana tabacum cDNA clone KL4B.105M02, m            | 84.89    | 1 |
| Unknown                                                                              | 2663.06  | 1 |
| Unknown                                                                              | 22.4     | 1 |
| Unknown                                                                              | 385.5    | 1 |
| gb AGN_RNC015xd21f1.ab1 AGN_RNC Nicotiana tabacum cDNA 5', mRNA sequenc              | 1067.86  | 1 |
| Unknown                                                                              | 60.98    | 1 |
| tc Rep: Calmodulin cam-210 - Daucus carota (Carrot), complete [TC44872]              | 130.25   | 1 |
| tc Rep: Voltage-dependent anion channel - Nicotiana tabacum (Common tobacco),        | 173.13   | 1 |
| gb KR3B.110I10F.051111T7 KR3B Nicotiana tabacum cDNA clone KR3B.110I10, mRl          | 50.18    | 1 |
| gb KN6B.103B01F.060103T7 KN6B Nicotiana tabacum cDNA clone KN6B.103B01, r            | 133.89   | 1 |
| Unknown                                                                              | 40.86    | 1 |
| gb KL4B.102M23F.051125T7 KL4B Nicotiana tabacum cDNA clone KL4B.102M23, r            | 619.63   | 1 |

|                                                                                     |         |   |
|-------------------------------------------------------------------------------------|---------|---|
| Unknown                                                                             | 19.16   | 1 |
| gb Nicotiana tabacum SAICAR synthetase (purC) mRNA, complete cds [AY429423]         | 18.24   | 1 |
| tc Rep: Pseudouridine synthase - Shewanella loihica (strain BAA-1088 / PV-4), parti | 482.22  | 1 |
| tc Rep: Chromosome chr4 scaffold_6, whole genome shotgun sequence - Vitis vinif     | 515.03  | 1 |
| tc Rep: 40S ribosomal protein S4 - Solanum tuberosum (Potato), complete [TC4041     | 411.67  | 1 |
| tc Rep: Chromosome chr8 scaffold_34, whole genome shotgun sequence - Vitis vin      | 23.78   | 1 |
| Unknown                                                                             | 79.74   | 1 |
| gb Nicotiana tabacum NtbZIP60 mRNA for basic region leucine zipper protein, com     | 2528.48 | 1 |
| Unknown                                                                             | 19.26   | 1 |
| Unknown                                                                             | 152.81  | 1 |
| gb KP1B.105O22F.060116T7 KP1B Nicotiana tabacum cDNA clone KP1B.105O22, m           | 96.92   | 1 |
| gb TT-17_L22 tobacco leaf library Nicotiana tabacum cDNA, mRNA sequence [FG63       | 27.83   | 1 |
| gb CHO_SL011xo14f1.ab1 CHO_SL Nicotiana tabacum cDNA, mRNA sequence [EH6            | 34.61   | 1 |
| tc Rep: Chromosome chr11 scaffold_14, whole genome shotgun sequence - Vitis vi      | 465.66  | 1 |
| tc Rep: Ribosomal protein S8 - Vitis vinifera (Grape), partial (94%) [TC64936]      | 119.33  | 1 |
| gb KN6B.101P10F.051230T7 KN6B Nicotiana tabacum cDNA clone KN6B.101P10, r           | 22.52   | 1 |
| gb KT7C.108L15F.051219T7 KT7 Nicotiana tabacum cDNA clone KT7C.108L15, mRN          | 122     | 1 |
| gb AGN_RNC114xj01f1.ab1 AGN_RNC Nicotiana tabacum cDNA 5', mRNA sequence            | 254.04  | 1 |
| gb CHO_SL028xe19f1.ab1 CHO_SL Nicotiana tabacum cDNA, mRNA sequence [EH6            | 32.25   | 1 |
| gb FS407121 normalized full-length tobacco cDNA library Nicotiana tabacum cDNA      | 943.28  | 1 |
| gb AGN_ELP012xc18f1.ab1 AGN_ELP Nicotiana tabacum cDNA 5', mRNA sequence            | 189.08  | 1 |
| gb AGN_ELP023xm08f1.ab1 AGN_ELP Nicotiana tabacum cDNA 5', mRNA sequence            | 48.49   | 1 |
| tc Rep: Glutaredoxin - Solanum lycopersicum (Tomato) (Lycopersicon esculentum),     | 45.22   | 1 |
| tc Rep: Chromosome chr1 scaffold_46, whole genome shotgun sequence - Vitis vin      | 151.18  | 1 |
| gb KN6B.102L11F.051230T7 KN6B Nicotiana tabacum cDNA clone KN6B.102L11, m           | 1083.47 | 1 |
| tc Rep: Chromosome chr2 scaffold_132, whole genome shotgun sequence - Vitis vi      | 387.18  | 1 |
| gb CHO_SL026xg23f1.ab1 CHO_SL Nicotiana tabacum cDNA, mRNA sequence [EH6            | 1131.2  | 1 |
| gb TT-41_L16 K326 early senescent leaf library Nicotiana tabacum cDNA, mRNA seq     | 39.89   | 1 |
| gb AGN_RNC127xl10f1.ab1 AGN_RNC Nicotiana tabacum cDNA 5', mRNA sequence            | 20.84   | 1 |
| gb KG9B.101D11F.060120T7 KG9B Nicotiana tabacum cDNA clone KG9B.101D11, n           | 574.51  | 1 |
| gb TT-06_K13 Samsun trichome library Nicotiana tabacum cDNA, mRNA sequence          | 133.78  | 1 |
| gb Nicotiana tabacum arm repeat-containing protein mRNA, complete cds [AY2192       | 99.17   | 1 |
| tc Rep: Metacaspase type II - Nicotiana benthamiana, partial (66%) [TC43115]        | 19.91   | 1 |
| Unknown                                                                             | 33.75   | 1 |

|                                                                                       |         |   |
|---------------------------------------------------------------------------------------|---------|---|
| gb Nicotiana tabacum mRNA for 14-3-3 c-2 protein, complete cds [AB119470]             | 2112.84 | 1 |
| tc Rep: Chromosome chr2 scaffold_11, whole genome shotgun sequence - Vitis vin        | 1393.35 | 1 |
| gb AGN_RNC022xm16f1.ab1 AGN_RNC Nicotiana tabacum cDNA 5', mRNA sequen                | 90.92   | 1 |
| gb TT-18_I13 K326 late senescent leaf library Nicotiana tabacum cDNA, mRNA sequ       | 25.01   | 1 |
| tc Rep: Fiber protein Fb15 - Gossypium barbadense (Sea-island cotton) (Egyptian cc    | 2711.54 | 1 |
| gb TOBESTR039E03 TOBEST cDNA library 1 Nicotiana tabacum cDNA 5', mRNA seq            | 35.39   | 1 |
| gb AGN_RNC022xc19f1.ab1 AGN_RNC Nicotiana tabacum cDNA 5', mRNA sequenc               | 21.17   | 1 |
| Unknown                                                                               | 30.81   | 1 |
| tc Rep: Chromosome chr13 scaffold_17, whole genome shotgun sequence - Vitis vi        | 390.41  | 1 |
| Unknown                                                                               | 147.43  | 1 |
| Unknown                                                                               | 41.64   | 1 |
| gb FS390471 normalized full-length tobacco cDNA library Nicotiana tabacum cDNA        | 476.01  | 1 |
| tc Rep: RNA Binding Protein 45 - Nicotiana plumbaginifolia (Leadwort-leaved tobac     | 228.15  | 1 |
| tc Rep: Ripening regulated protein DDTFR10-like - Solanum tuberosum (Potato), co      | 2580.07 | 1 |
| gb AM841116 seedling library, SL Nicotiana tabacum cDNA clone nt002150071, mF         | 694.76  | 1 |
| Unknown                                                                               | 18.7    | 1 |
| tc Rep: Transcription factor IIA, beta-barrel - Medicago truncatula (Barrel medic), p | 3274.07 | 1 |
| gb KL4B.104P21F.051104T7 KL4B Nicotiana tabacum cDNA clone KL4B.104P21, mR            | 470.05  | 1 |
| tc Rep: Chromosome undetermined scaffold_203, whole genome shotgun sequenc            | 15965.9 | 1 |
| Unknown                                                                               | 63.35   | 1 |
| Unknown                                                                               | 30.26   | 1 |
| tc Rep: Chromosome chr17 scaffold_16, whole genome shotgun sequence - Vitis vi        | 340.07  | 1 |
| tc Rep: Acetolactate synthase 1, chloroplast precursor - Nicotiana tabacum (Comm      | 120.78  | 1 |
| gb KL4B.103L20F.051103T7 KL4B Nicotiana tabacum cDNA clone KL4B.103L20, mRI           | 444.96  | 1 |
| tc Rep: Chromosome chr3 scaffold_8, whole genome shotgun sequence - Vitis vinif       | 152.01  | 1 |
| Unknown                                                                               | 129.31  | 1 |
| tc Rep: Chromosome chr13 scaffold_17, whole genome shotgun sequence - Vitis vi        | 946.83  | 1 |
| tc Rep: Chromosome chr13 scaffold_48, whole genome shotgun sequence - Vitis vi        | 28.3    | 1 |
| gb TT-40_L10 tobacco leaf library Nicotiana tabacum cDNA, mRNA sequence [FG63         | 3684.89 | 1 |
| Unknown                                                                               | 20.93   | 1 |
| gb KG9B.102P02F.051126T7 KG9B Nicotiana tabacum cDNA clone KG9B.102P02, m             | 478.76  | 1 |
| gb CHO_SL027xl15f1.ab1 CHO_SL Nicotiana tabacum cDNA, mRNA sequence [EH62             | 23.03   | 1 |
| tc Rep: Fas-associated factor 1-like protein - Capsicum annuum (Bell pepper), parti   | 218.76  | 1 |
| gb TOBESTR046G03 TOBEST cDNA library 1 Nicotiana tabacum cDNA 5', mRNA seq            | 60.27   | 1 |

|                                                                                             |          |   |
|---------------------------------------------------------------------------------------------|----------|---|
| gb Nicotiana tabacum Avr9 [AY220484]                                                        | 209.09   | 1 |
| tc Rep: ATP-dependent Clp protease proteolytic subunit - Vitis vinifera (Grape), par        | 25.9     | 1 |
| tc Rep: Cyprosin - Cynara cardunculus (Cardoon), partial (5%) [TC74489]                     | 21.83    | 1 |
| gb KL5B.115B21F.060217T7 KL5B Nicotiana tabacum cDNA clone KL5B.115B21, mR                  | 50.72    | 1 |
| gb AGN_RNC014xf09r1.ab1 AGN_RNC Nicotiana tabacum cDNA 3', mRNA sequenc                     | 18.57    | 1 |
| Unknown                                                                                     | 128.67   | 1 |
| Unknown                                                                                     | 127.37   | 1 |
| gb KT7C.110E06F.051221T7 KT7 Nicotiana tabacum cDNA clone KT7C.110E06, mRN                  | 28.46    | 1 |
| gb EST_FLW001xa21f1.ab1 EST_FLW Nicotiana tabacum cDNA, mRNA sequence [Ei                   | 20.86    | 1 |
| tc Rep: CCCH-type Zn-finger protein - Ostreococcus tauri, partial (8%) [TC76477]            | 18.66    | 1 |
| Unknown                                                                                     | 98.98    | 1 |
| gb KG9B.003P21F.050720T7 KG9B Nicotiana tabacum cDNA clone KG9B.003P21, m                   | 24.05    | 1 |
| gb Nicotiana tabacum Rac-like GTPase 1 mRNA, complete cds [AY029330]                        | 1041.41  | 1 |
| Unknown                                                                                     | 401.63   | 1 |
| gb KP1B.104E09F.050725T7 KP1B Nicotiana tabacum cDNA clone KP1B.104E09, mF                  | 93.99    | 1 |
| gb Nicotiana tabacum 3-deoxy-D-arabino-heptulosonate 7-phosphate synthase, co               | 694.49   | 1 |
| gb KG9B.102G14F.051126T7 KG9B Nicotiana tabacum cDNA clone KG9B.102G14, n                   | 533.46   | 1 |
| tc Rep: Histone H2A - Vitis vinifera (Grape), partial (97%) [TC42842]                       | 1836.58  | 1 |
| Unknown                                                                                     | 35561.15 | 1 |
| gb AM833705 seedling library, SL Nicotiana tabacum cDNA clone nt002132050, mF               | 183.5    | 1 |
| gb FS406206 normalized full-length tobacco cDNA library Nicotiana tabacum cDNA              | 85.31    | 1 |
| Unknown                                                                                     | 24.12    | 1 |
| tc Rep: Small basic intrinsic protein 1 - Vitis vinifera (Grape), partial (81%) [TC46304    | 47.32    | 1 |
| tc Rep: Splicing factor-like protein - Vitis riparia (Frost grape) (Vitis vulpina), partial | 187.74   | 1 |
| gb Nicotiana tabacum S-adenosyl-methionine-sterol-C-methyltransferase mRNA, c               | 18071.5  | 1 |
| tc Rep: Chromosome chr10 scaffold_50, whole genome shotgun sequence - Vitis vi              | 178.83   | 1 |
| gb KF8B.100O16F.051010T7 KF8 Nicotiana tabacum cDNA clone KF8B.100O16, mRi                  | 180.47   | 1 |
| tc Rep: Chromosome chr8 scaffold_99, whole genome shotgun sequence - Vitis vin              | 268.26   | 1 |
| tc Rep: 60s acidic ribosomal protein-like protein - Solanum tuberosum (Potato), coi         | 1173.73  | 1 |
| tc Rep: SJCHGC06320 protein - Schistosoma japonicum (Blood fluke), partial (7%) [T          | 87.13    | 1 |
| tc Rep: Predicted protein - Physcomitrella patens subsp. patens, partial (96%) [TC54        | 90.01    | 1 |
| tc Rep: Chromosome chr7 scaffold_31, whole genome shotgun sequence - Vitis vin              | 38.26    | 1 |
| tc Rep: Chromosome chr8 scaffold_23, whole genome shotgun sequence - Vitis vin              | 1178.94  | 1 |
| Unknown                                                                                     | 91.45    | 1 |



|                                                                                      |         |   |
|--------------------------------------------------------------------------------------|---------|---|
| tc Rep: Alpha-glucan water dikinase, chloroplast precursor - Solanum tuberosum (P    | 26.05   | 1 |
| gb AGN_RNC005xf07f1.ab1 AGN_RNC Nicotiana tabacum cDNA 5', mRNA sequenc              | 45.04   | 1 |
| tc Rep: Chromosome chr18 scaffold_1, whole genome shotgun sequence - Vitis vin       | 849.13  | 1 |
| gb KR3B.114O13F.060119T7 KR3B Nicotiana tabacum cDNA clone KR3B.114O13, r            | 60.75   | 1 |
| tc Rep: Chromosome chr5 scaffold_64, whole genome shotgun sequence - Vitis vin       | 54.52   | 1 |
| Unknown                                                                              | 270.6   | 1 |
| gb AGN_RPC023xf04f1.ab1 AGN_RPC Nicotiana tabacum cDNA 5', mRNA sequence             | 183.64  | 1 |
| Unknown                                                                              | 30.33   | 1 |
| gb KN6B.103N23F.060103T7 KN6B Nicotiana tabacum cDNA clone KN6B.103N23, r            | 141.71  | 1 |
| Unknown                                                                              | 20.69   | 1 |
| gb AM807618 seedling library, SL Nicotiana tabacum cDNA clone nt002189039, mF        | 277     | 1 |
| gb N.tabacum mRNA for aldehyde dehydrogenase [Y09876]                                | 1970.67 | 1 |
| tc Rep: GrpE protein - Arabidopsis thaliana (Mouse-ear cress), partial (52%) [TC450  | 56.35   | 1 |
| gb KG9B.005L07F.050721T7 KG9B Nicotiana tabacum cDNA clone KG9B.005L07, m            | 625.6   | 1 |
| Unknown                                                                              | 977.07  | 1 |
| tc Rep: Ribosomal protein L41 - Candida maltosa (Yeast), complete [TC54676]          | 56.95   | 1 |
| gb KP1B.101C01F.050722T7 KP1B Nicotiana tabacum cDNA clone KP1B.101C01, ml           | 152.74  | 1 |
| tc Rep: Chromosome chr5 scaffold_2, whole genome shotgun sequence - Vitis vinif      | 7623.95 | 1 |
| gb AGN_RNC127xk14f1.ab1 AGN_RNC Nicotiana tabacum cDNA 5', mRNA sequenc              | 31.2    | 1 |
| Unknown                                                                              | 110.85  | 1 |
| gb KG9B.005N18F.050721T7 KG9B Nicotiana tabacum cDNA clone KG9B.005N18, n            | 673.31  | 1 |
| tc Rep: Chromosome chr5 scaffold_2, whole genome shotgun sequence - Vitis vinif      | 94.59   | 1 |
| gb AGN_RNC123xe03f1.ab1 AGN_RNC Nicotiana tabacum cDNA 5', mRNA sequenc              | 50.08   | 1 |
| tc Rep: Chromosome chr3 scaffold_117, whole genome shotgun sequence - Vitis vi       | 19.82   | 1 |
| gb KN6B.103G24F.060103T7 KN6B Nicotiana tabacum cDNA clone KN6B.103G24, n            | 202.87  | 1 |
| gb AGN_RNC023xh11f1.ab1 AGN_RNC Nicotiana tabacum cDNA 5', mRNA sequenc              | 120.72  | 1 |
| tc Rep: Protein tyrosine phosphatase - Fagus sylvatica (Beechnut), partial (43%) [TC | 202.43  | 1 |
| gb Nicotiana tabacum elongation factor 1-alpha mRNA, complete cds [AF120093]         | 2311.89 | 1 |
| tc Rep: Beta-galactosidase - Vitis vinifera (Grape), partial (26%) [TC46252]         | 36.06   | 1 |
| Unknown                                                                              | 51.51   | 1 |
| tc Rep: Chromosome chr4 scaffold_6, whole genome shotgun sequence - Vitis vinif      | 27.19   | 1 |
| tc Rep: Chromosome chr3 scaffold_199, whole genome shotgun sequence - Vitis vi       | 51.48   | 1 |
| tc Rep: Chromosome chr17 scaffold_101, whole genome shotgun sequence - Vitis v       | 24.85   | 1 |
| gb TT-16_F21 K326 late senescent leaf library Nicotiana tabacum cDNA, mRNA seq       | 50.11   | 1 |

|                                                                                    |         |   |
|------------------------------------------------------------------------------------|---------|---|
| gb AGN_RNC026xj22f1.ab1 AGN_RNC Nicotiana tabacum cDNA 5', mRNA sequence           | 167.21  | 1 |
| Unknown                                                                            | 19.93   | 1 |
| gb KL4B.108F02F.051105T7 KL4B Nicotiana tabacum cDNA clone KL4B.108F02, mRNA       | 856.64  | 1 |
| tc Rep: Chromosome chr13 scaffold_48, whole genome shotgun sequence - Vitis vi     | 445.85  | 1 |
| tc Rep: RAB5B - Lotus japonicus, partial (90%) [TC42073]                           | 1178.22 | 1 |
| gb CHO_SL012xf08f1.ab1 CHO_SL Nicotiana tabacum cDNA, mRNA sequence [EH6:          | 10961.7 | 1 |
| tc Rep: Small GTP-binding protein - Nicotiana plumbaginifolia (Leadwort-leaved tob | 4327.31 | 1 |
| gb KR3B.001M09F.050815T7 KR3B Nicotiana tabacum cDNA clone KR3B.001M09, r          | 142.09  | 1 |
| gb KL4B.101M14F.051103T7 KL4B Nicotiana tabacum cDNA clone KL4B.101M14, m          | 34.93   | 1 |
| Unknown                                                                            | 2922.69 | 1 |
| tc GB X03481.1 CAA27200.1 putative ribosomal protein S12 [Nicotiana tabacum]       | 1673.24 | 1 |
| gb KT7C.112C08F.051221T7 KT7 Nicotiana tabacum cDNA clone KT7C.112C08, mRN         | 642.18  | 1 |
| Unknown                                                                            | 59.33   | 1 |
| gb BL12.103G21F.060309T7 BL12 Nicotiana tabacum cDNA clone BL12.103G21, mF         | 2839.83 | 1 |
| gb KF8C.103G19F.051214T7 KF8 Nicotiana tabacum cDNA clone KF8C.103G19, mRN         | 1600.35 | 1 |
| gb BP525578 MAT001 Nicotiana tabacum cDNA clone BY10260, mRNA sequence [E          | 46.17   | 1 |
| gb AM843516 seedling library, SL Nicotiana tabacum cDNA clone nt002111072, mF      | 321.51  | 1 |
| gb AGN_PNL206cf1_f5.trimmed.seq AGN_PNL Nicotiana tabacum cDNA 5', mRNA :          | 29.54   | 1 |
| Unknown                                                                            | 30.17   | 1 |
| tc Rep: Catalase isozyme 3 - Nicotiana plumbaginifolia (Leadwort-leaved tobacco),  | 3707.46 | 1 |
| Unknown                                                                            | 44.48   | 1 |
| gb KF8C.102I02F.051214T7 KF8 Nicotiana tabacum cDNA clone KF8C.102I02, mRN         | 59.08   | 1 |
| gb KT7C.108N19F.051219T7 KT7 Nicotiana tabacum cDNA clone KT7C.108N19, mR          | 233.47  | 1 |
| gb KP1B.113H24F.060117T7 KP1B Nicotiana tabacum cDNA clone KP1B.113H24, m          | 125.24  | 1 |
| Unknown                                                                            | 67.91   | 1 |
| tc Rep: Chromosome chr14 scaffold_26, whole genome shotgun sequence - Vitis vi     | 153.98  | 1 |
| gb KG9B.102F13F.051126T7 KG9B Nicotiana tabacum cDNA clone KG9B.102F13, m          | 60.59   | 1 |
| Unknown                                                                            | 49.93   | 1 |
| tc Rep: UDP-glucuronic acid decarboxylase 1 - Populus tomentosa (Chinese white p   | 2625.08 | 1 |
| tc Rep: Chromosome chr6 scaffold_3, whole genome shotgun sequence - Vitis vinif    | 330.19  | 1 |
| Unknown                                                                            | 131.17  | 1 |
| gb KG9B.103N07F.051128T7 KG9B Nicotiana tabacum cDNA clone KG9B.103N07, n          | 237.32  | 1 |
| Unknown                                                                            | 33.16   | 1 |
| gb KF8C.101E15F.051214T7 KF8 Nicotiana tabacum cDNA clone KF8C.101E15, mRN         | 462.96  | 1 |

|                                                                                      |          |   |
|--------------------------------------------------------------------------------------|----------|---|
| gb AM822487 COL, cold overnight library Nicotiana tabacum cDNA clone nt006178        | 34.11    | 1 |
| Unknown                                                                              | 31.39    | 1 |
| tc Rep: 40S ribosomal protein S19-like - Solanum tuberosum (Potato), complete [T     | 79.69    | 1 |
| tc Rep: Chromosome chr8 scaffold_34, whole genome shotgun sequence - Vitis vin       | 40.39    | 1 |
| gb KL5B.103B17F.060207T7 KL5B Nicotiana tabacum cDNA clone KL5B.103B17, mR           | 500.41   | 1 |
| gb Nicotiana tabacum mRNA, transcriptionally up-regulated region associated with     | 3921.61  | 1 |
| gb KP1B.101D13F.050722T7 KP1B Nicotiana tabacum cDNA clone KP1B.101D13, m            | 607.1    | 1 |
| gb KP1B.105G24F.060116T7 KP1B Nicotiana tabacum cDNA clone KP1B.105G24, m            | 1253.08  | 1 |
| tc Rep: Chromosome chr10 scaffold_433, whole genome shotgun sequence - Vitis v       | 31053.85 | 1 |
| gb KF8B.100D10F.151010T7 KF8 Nicotiana tabacum cDNA clone KF8B.100D10, mR            | 3451.52  | 1 |
| tc Rep: Transcriptional coactivator multiprotein bridging factor - Solanum lycopersi | 63.93    | 1 |
| gb KF8C.109H20F.051215T7 KF8 Nicotiana tabacum cDNA clone KF8C.109H20, mR            | 5276.74  | 1 |
| tc Rep: Chromosome chr19 scaffold_66, whole genome shotgun sequence - Vitis vi       | 20.76    | 1 |
| gb Nicotiana tabacum mRNA for cytosolic ascorbate peroxidase, complete cds [D8       | 1081.93  | 1 |
| gb Nicotiana tabacum cultivar Burley 21 arginine decarboxylase 1 (ADC1) mRNA, cc     | 8930.92  | 1 |
| tc Rep: Chromosome chr12 scaffold_38, whole genome shotgun sequence - Vitis vi       | 219.44   | 1 |
| tc Rep: Chromosome chr18 scaffold_61, whole genome shotgun sequence - Vitis vi       | 107.7    | 1 |
| gb KG9B.102K02F.051126T7 KG9B Nicotiana tabacum cDNA clone KG9B.102K02, m            | 519.07   | 1 |
| gb KG9B.105M08F.051128T7 KG9B Nicotiana tabacum cDNA clone KG9B.105M08,              | 864.73   | 1 |
| Unknown                                                                              | 33.26    | 1 |
| gb TT-48_L05 Burley21 trichome library Nicotiana tabacum cDNA, mRNA sequence         | 44.79    | 1 |
| tc Rep: Clp-like energy-dependent protease precursor - Solanum lycopersicum (Tor     | 38.36    | 1 |
| tc Rep: Chromosome undetermined scaffold_533, whole genome shotgun sequenc           | 1155.94  | 1 |
| gb KG9B.106G12F.051129T7 KG9B Nicotiana tabacum cDNA clone KG9B.106G12, n            | 145.38   | 1 |
| gb AGN_RNC030xa01f1.ab1 AGN_RNC Nicotiana tabacum cDNA 5', mRNA sequenc              | 24.19    | 1 |
| gb TT-47_P04 Burley21 trichome library Nicotiana tabacum cDNA, mRNA sequence         | 253.15   | 1 |
| Unknown                                                                              | 30.75    | 1 |
| gb KF8B.201I20F.060124T7 KF8 Nicotiana tabacum cDNA clone KF8B.201I20, mRN/          | 29.1     | 1 |
| gb AGN_RPC019xI08f1.ab1 AGN_RPC Nicotiana tabacum cDNA 5', mRNA sequence             | 64.39    | 1 |
| gb AGN_ELP008xk06f1.ab1 AGN_ELP Nicotiana tabacum cDNA 5', mRNA sequence             | 20.7     | 1 |
| gb BP534288 MAT005 Nicotiana tabacum cDNA clone BY32245, mRNA sequence [E            | 40.14    | 1 |
| gb KL4B.107L11F.051126T7 KL4B Nicotiana tabacum cDNA clone KL4B.107L11, mR           | 28.97    | 1 |
| Unknown                                                                              | 107.87   | 1 |
| Unknown                                                                              | 19.4     | 1 |

|                                                                                        |          |   |
|----------------------------------------------------------------------------------------|----------|---|
| tc Rep: DNA polymerase - Brassica napus (Rape), partial (18%) [TC65518]                | 26.63    | 1 |
| gb AGN_RNC016xi07r1.ab1 AGN_RNC Nicotiana tabacum cDNA 3', mRNA sequence [EH6]         | 23.46    | 1 |
| tc Rep: Beta-1,3-glucanase, acidic - Coffea arabica (Coffee), partial (73%) [TC46708]  | 24649.95 | 1 |
| gb 30F11 Transformed tobacco Lambda Zap II library Nicotiana tabacum cDNA 5', nt       | 393.09   | 1 |
| gb EST_CSP005xi13f1.ab1 EST_CSP Nicotiana tabacum cDNA, mRNA sequence [EH6]            | 146.49   | 1 |
| Unknown                                                                                | 28.77    | 1 |
| tc Rep: Ethylene-responsive small GTP-binding protein - Solanum lycopersicum (Tomato)  | 4108.67  | 1 |
| tc Rep: Chromosome chr2 scaffold_105, whole genome shotgun sequence - Vitis vinifera   | 17483.15 | 1 |
| gb CHO_SL025xn08f1.ab1 CHO_SL Nicotiana tabacum cDNA, mRNA sequence [EH6]              | 1021.5   | 1 |
| gb TT-21_K22 K326 late senescent leaf library Nicotiana tabacum cDNA, mRNA sequence    | 28.56    | 1 |
| gb Nicotiana tabacum blp4 mRNA for luminal binding protein (BiP) [X60057]              | 4775.39  | 1 |
| tc Rep: Chromosome chr7 scaffold_42, whole genome shotgun sequence - Vitis vinifera    | 31.57    | 1 |
| gb N.tabacum NeIF-4A15 mRNA [X79138]                                                   | 231.76   | 1 |
| gb AGN_RNC025xm15f1.ab1 AGN_RNC Nicotiana tabacum cDNA 5', mRNA sequence [EH6]         | 53.33    | 1 |
| tc Rep: Proteasome subunit alpha type - Solanum tuberosum (Potato), complete [T]       | 30.64    | 1 |
| gb AGN_PNL225df1_f1.trimmed.seq AGN_PNL Nicotiana tabacum cDNA 5', mRNA sequence       | 161.79   | 1 |
| tc Rep: Chromosome chr13 scaffold_48, whole genome shotgun sequence - Vitis vinifera   | 116.53   | 1 |
| Unknown                                                                                | 272.49   | 1 |
| Unknown                                                                                | 377.5    | 1 |
| tc Rep: 2,3-bisphosphoglycerate-independent phosphoglycerate mutase - Nicotiana glauca | 10713.95 | 1 |
| Unknown                                                                                | 21       | 1 |
| tc Rep: Chromosome chr17 scaffold_16, whole genome shotgun sequence - Vitis vinifera   | 205.68   | 1 |
| gb CHO_SL021xp22f1.ab1 CHO_SL Nicotiana tabacum cDNA, mRNA sequence [EH6]              | 76.69    | 1 |
| Unknown                                                                                | 34.5     | 1 |
| gb AGN_RPC022xl07f1.ab1 AGN_RPC Nicotiana tabacum cDNA 5', mRNA sequence               | 18.72    | 1 |
| gb AGN_PNL210cr1_c4.trimmed.seq AGN_PNL Nicotiana tabacum cDNA 3', mRNA sequence       | 21.57    | 1 |
| tc Rep: Chromosome undetermined scaffold_91, whole genome shotgun sequence             | 92.7     | 1 |
| tc Rep: Chromosome undetermined scaffold_203, whole genome shotgun sequence            | 108.85   | 1 |
| tc Rep: Chromosome chr17 scaffold_16, whole genome shotgun sequence - Vitis vinifera   | 46.78    | 1 |
| tc Rep: Chromosome chr4 scaffold_83, whole genome shotgun sequence - Vitis vinifera    | 112.34   | 1 |
| gb TT-04_J02 K326 early senescent leaf library Nicotiana tabacum cDNA, mRNA sequence   | 24.37    | 1 |
| gb TT-34_I06 Samsun trichome library Nicotiana tabacum cDNA, mRNA sequence [EH6]       | 148.04   | 1 |
| Unknown                                                                                | 86.27    | 1 |
| tc GB X06310.1 CAA29629.1 unnamed protein product [Nicotiana tabacum] [NP91]           | 541.47   | 1 |

|                                                                                       |          |   |
|---------------------------------------------------------------------------------------|----------|---|
| Unknown                                                                               | 49.7     | 1 |
| Unknown                                                                               | 3170.97  | 1 |
| gb KT7C.102N07F.051216T7 KT7 Nicotiana tabacum cDNA clone KT7C.102N07, mR             | 135.41   | 1 |
| Unknown                                                                               | 50.77    | 1 |
| Unknown                                                                               | 22.96    | 1 |
| tc Rep: Pyruvate kinase - Oryza sativa subsp. japonica (Rice), partial (71%) [TC44484 | 270.2    | 1 |
| gb KN6B.108A05F.060106T7 KN6B Nicotiana tabacum cDNA clone KN6B.108A05, n             | 71.34    | 1 |
| Unknown                                                                               | 185.12   | 1 |
| tc Rep: ER lumen protein retaining receptor - Petunia hybrida (Petunia), partial (27% | 1278.29  | 1 |
| tc Rep: Nitrate reductase [NADH] 2 - Nicotiana tabacum (Common tobacco), partia       | 293.39   | 1 |
| gb AGN_RNC020xg03f1.ab1 AGN_RNC Nicotiana tabacum cDNA 5', mRNA sequenc               | 29.98    | 1 |
| Unknown                                                                               | 201.29   | 1 |
| gb KP1B.001B15F.050628T7 KP1B Nicotiana tabacum cDNA clone KP1B.001B15, ml            | 336.32   | 1 |
| tc Rep: Chromosome chr19 scaffold_66, whole genome shotgun sequence - Vitis vi        | 26.21    | 1 |
| gb KP1B.101P01F.050722T7 KP1B Nicotiana tabacum cDNA clone KP1B.101P01, ml            | 4327.31  | 1 |
| tc Rep: Chromosome chr9 scaffold_7, whole genome shotgun sequence - Vitis vinif       | 200.72   | 1 |
| gb TT-09_B08 Samsun trichome library Nicotiana tabacum cDNA, mRNA sequence            | 686.09   | 1 |
| tc Rep: Ribosomal protein L37 - Glycine max (Soybean), partial (97%) [TC58707]        | 57.96    | 1 |
| Unknown                                                                               | 468.2    | 1 |
| gb TT-06_C03 Samsun trichome library Nicotiana tabacum cDNA, mRNA sequence            | 3130.07  | 1 |
| gb TT-39_E01 K326 late senescent leaf library Nicotiana tabacum cDNA, mRNA seq        | 410.44   | 1 |
| Unknown                                                                               | 548.57   | 1 |
| tc Rep: Glutathione synthetase, chloroplast precursor - Solanum lycopersicum (Ton     | 23.48    | 1 |
| Unknown                                                                               | 35.62    | 1 |
| gb KF8B.201M04F.060124T7 KF8 Nicotiana tabacum cDNA clone KF8B.201M04, mF             | 1715.36  | 1 |
| gb KT7C.108H18F.051219T7 KT7 Nicotiana tabacum cDNA clone KT7C.108H18, mRl            | 152.85   | 1 |
| tc Rep: Chromosome chr18 scaffold_1, whole genome shotgun sequence - Vitis vin        | 50.17    | 1 |
| Unknown                                                                               | 78.19    | 1 |
| tc Rep: Chromosome chr11 scaffold_56, whole genome shotgun sequence - Vitis vi        | 366.66   | 1 |
| gb N.tabacum mRNA for protein phosphatase 2A, 65kD regulatory subunit [X97913         | 488.74   | 1 |
| tc Rep: Chromosome chr18 scaffold_137, whole genome shotgun sequence - Vitis v        | 531.85   | 1 |
| tc Rep: Actin-101 - Solanum tuberosum (Potato), partial (19%) [TC62782]               | 10862.75 | 1 |
| gb Nicotiana tabacum mRNA for ethylene responsive element binding factor, comp        | 4683.18  | 1 |
| tc Rep: Alpha chain of nascent polypeptide associated complex - Nicotiana benthar     | 373.91   | 1 |

|                                                                                      |         |   |
|--------------------------------------------------------------------------------------|---------|---|
| tc Rep: Pyruvate kinase - Arabidopsis thaliana (Mouse-ear cress), partial (84%) [TC5 | 49.6    | 1 |
| tc Rep: Dehydrin-like protein - Solanum sogarandinum, partial (86%) [TC57177]        | 5019.95 | 1 |
| tc Rep: Chromosome chr8 scaffold_68, whole genome shotgun sequence - Vitis vin       | 22.69   | 1 |
| tc Rep: DnaJ homolog - Salix gilgiana (Willow), partial (41%) [TC58289]              | 277.95  | 1 |
| gb KF8B.100B11F.051010T7 KF8 Nicotiana tabacum cDNA clone KF8B.100B11, mRN           | 26.49   | 1 |
| tc Rep: Chromosome chr13 scaffold_48, whole genome shotgun sequence - Vitis vi       | 199.19  | 1 |
| gb KF8C.103J18F.051214T7 KF8 Nicotiana tabacum cDNA clone KF8C.103J18, mRN           | 1326.74 | 1 |
| Unknown                                                                              | 1578.17 | 1 |
| gb Nicotiana tabacum NtTOM1 mRNA for tobamovirus multiplication 1, complete c        | 93.65   | 1 |
| gb KP1B.108E01F.050726T7 KP1B Nicotiana tabacum cDNA clone KP1B.108E01, mF           | 495.74  | 1 |
| gb CHO_SL006xm14f1.ab1 CHO_SL Nicotiana tabacum cDNA, mRNA sequence [EH6             | 649.04  | 1 |
| tc Rep: Elongation factor 1-alpha - Nicotiana paniculata, partial (53%) [TC48055]    | 92.04   | 1 |
| gb KG9B.104P17F.060120T7 KG9B Nicotiana tabacum cDNA clone KG9B.104P17, m            | 101     | 1 |
| gb KL4B.104I05F.051104T7 KL4B Nicotiana tabacum cDNA clone KL4B.104I05, mRN          | 183.44  | 1 |
| Unknown                                                                              | 22.86   | 1 |
| tc Rep: Integrase core domain containing protein - Solanum demissum (Wild potato     | 61.19   | 1 |
| tc Rep: GTP-binding nuclear protein Ran-A1 - Nicotiana tabacum (Common tobaccc       | 2862.21 | 1 |
| gb AM830968 COL, cold overnight library Nicotiana tabacum cDNA clone nt006147        | 112.76  | 1 |
| Unknown                                                                              | 3303.57 | 1 |
| tc Rep: Chromosome undetermined scaffold_223, whole genome shotgun sequenc           | 1326.98 | 1 |
| gb AGN_RNC017xd12f1.ab1 AGN_RNC Nicotiana tabacum cDNA 5', mRNA sequenc              | 942.25  | 1 |
| Unknown                                                                              | 53.52   | 1 |
| tc Rep: Gamma hydroxybutyrate dehydrogenase - Arabidopsis thaliana (Mouse-ear        | 789.8   | 1 |
| tc Rep: Glycosyltransferase - Pseudomonas stutzeri (strain A1501), partial (5%) [TC  | 18.69   | 1 |
| gb Nicotiana tabacum cDNA-AFLP fragment N_BC2M23-2 sequence [DQ460091]               | 37.78   | 1 |
| gb KL4B.103D07F.051103T7 KL4B Nicotiana tabacum cDNA clone KL4B.103D07, mF           | 25.66   | 1 |
| gb AM783785 DL, diurnal library Nicotiana tabacum cDNA clone nt005196078, mRI        | 49.96   | 1 |
| tc Rep: Chromosome chr14 scaffold_27, whole genome shotgun sequence - Vitis vi       | 888.14  | 1 |
| Unknown                                                                              | 764.55  | 1 |
| tc Rep: Chromosome chr13 scaffold_17, whole genome shotgun sequence - Vitis vi       | 1591.41 | 1 |
| gb AGN_RNC021xp16f1.ab1 AGN_RNC Nicotiana tabacum cDNA 5', mRNA sequenc              | 107.52  | 1 |
| gb TOBESTR009E12 TOBEST cDNA library 1 Nicotiana tabacum cDNA 5', mRNA seq           | 361.48  | 1 |
| gb AGN_RNC026xn20f1.ab1 AGN_RNC Nicotiana tabacum cDNA 5', mRNA sequenc              | 362.51  | 1 |
| gb TT-40_L02 K326 early senescent leaf library Nicotiana tabacum cDNA, mRNA sec      | 27.42   | 1 |

|                                                                                      |         |   |
|--------------------------------------------------------------------------------------|---------|---|
| gb KR2B.111F22F.060128T7 KR2B Nicotiana tabacum cDNA clone KR2B.111F22, mF           | 1400.23 | 1 |
| gb AM799744 seedling library, SL Nicotiana tabacum cDNA clone nt002285028, mF        | 91.4    | 1 |
| tc Rep: Chromosome chr8 scaffold_68, whole genome shotgun sequence - Vitis vin       | 580.33  | 1 |
| Unknown                                                                              | 569.8   | 1 |
| tc Rep: Chromosome chr8 scaffold_23, whole genome shotgun sequence - Vitis vin       | 41.59   | 1 |
| tc Rep: Chromosome chr6 scaffold_3, whole genome shotgun sequence - Vitis vinif      | 37.16   | 1 |
| gb FS412189 normalized full-length tobacco cDNA library Nicotiana tabacum cDNA       | 42.52   | 1 |
| Unknown                                                                              | 164.43  | 1 |
| gb KL4B.111E15F.060128T7 KL4B Nicotiana tabacum cDNA clone KL4B.111E15, mR           | 41.27   | 1 |
| tc Rep: Proteasome subunit alpha type - Nicotiana tabacum (Common tobacco), co       | 137.22  | 1 |
| tc Rep: Chromosome chr14 scaffold_21, whole genome shotgun sequence - Vitis vi       | 215.99  | 1 |
| tc Rep: Superoxide dismutase [Mn], mitochondrial precursor - Capsicum annuum (f      | 114.68  | 1 |
| gb KP1B.102C18F.050722T7 KP1B Nicotiana tabacum cDNA clone KP1B.102C18, mI           | 334.4   | 1 |
| tc Rep: NADH ubiquinone oxidoreductase PSST subunit - Lupinus luteus (European       | 16619.1 | 1 |
| gb KT7C.113K05F.051221T7 KT7 Nicotiana tabacum cDNA clone KT7C.113K05, mR            | 59.83   | 1 |
| gb KG9B.004J08F.050721T7 KG9B Nicotiana tabacum cDNA clone KG9B.004J08, mF           | 27.56   | 1 |
| gb KP1B.104L24F.050725T7 KP1B Nicotiana tabacum cDNA clone KP1B.104L24, mF           | 80.82   | 1 |
| Unknown                                                                              | 185.71  | 1 |
| gb AGN_RNC016xd11f1.ab1 AGN_RNC Nicotiana tabacum cDNA 5', mRNA sequenc              | 29.55   | 1 |
| tc Rep: RNA Binding Protein 45 - Nicotiana plumbaginifolia (Leadwort-leaved tobac    | 479.57  | 1 |
| tc Rep: AT5g64840/MXK3_6 - Arabidopsis thaliana (Mouse-ear cress), partial (73%)     | 54.74   | 1 |
| tc Rep: Chromosome chr8 scaffold_99, whole genome shotgun sequence - Vitis vin       | 1383.71 | 1 |
| Unknown                                                                              | 168.18  | 1 |
| gb AGN_RNC018xl18f1.ab1 AGN_RNC Nicotiana tabacum cDNA 5', mRNA sequenc              | 800.26  | 1 |
| tc Rep: Chromosome chr5 scaffold_67, whole genome shotgun sequence - Vitis vin       | 467.63  | 1 |
| Unknown                                                                              | 38.27   | 1 |
| tc Rep: Chromosome chr6 scaffold_3, whole genome shotgun sequence - Vitis vinif      | 974.67  | 1 |
| gb AM835908 DL, diurnal library Nicotiana tabacum cDNA clone nt005254053, mR         | 776.56  | 1 |
| Unknown                                                                              | 79.94   | 1 |
| tc Rep: Chromosome chr4 scaffold_6, whole genome shotgun sequence - Vitis vinif      | 137.18  | 1 |
| tc Rep: Methionine aminopeptidase - Vitis vinifera (Grape), partial (55%) [TC55832]  | 23.15   | 1 |
| Unknown                                                                              | 47.86   | 1 |
| gb KG9B.107A16F.060120T7 KG9B Nicotiana tabacum cDNA clone KG9B.107A16, n            | 66.73   | 1 |
| tc Rep: Os07g0192300 protein - Oryza sativa subsp. japonica (Rice), partial (68%) [T | 183.42  | 1 |

|                                                                                      |          |   |
|--------------------------------------------------------------------------------------|----------|---|
| gb KR2B.110B08F.051229T7 KR2B Nicotiana tabacum cDNA clone KR2B.110B08, m            | 109.63   | 1 |
| gb AGN_RNC014xg12f1.ab1 AGN_RNC Nicotiana tabacum cDNA 5', mRNA sequenc              | 263.18   | 1 |
| gb Nicotiana tabacum cDNA-AFLP-fragment BSTT22-430, cultivar Bright Yellow 2 [A      | 654.43   | 1 |
| tc Rep: Aminomethyltransferase, mitochondrial precursor - Solanum tuberosum (P       | 140.35   | 1 |
| Unknown                                                                              | 31.54    | 1 |
| gb TT-22_D24 K326 early senescent leaf library Nicotiana tabacum cDNA, mRNA se       | 244.59   | 1 |
| tc Rep: Chromosome chr5 scaffold_64, whole genome shotgun sequence - Vitis vin       | 42.69    | 1 |
| gb AGN_RNC014xg05f1.ab1 AGN_RNC Nicotiana tabacum cDNA 5', mRNA sequenc              | 22.35    | 1 |
| gb Nicotiana tabacum cystathionine gamma-synthase precursor (metB) mRNA, con         | 1285.3   | 1 |
| tc Rep: Alpha-1,6-xylosyltransferase - Gossypium raimondii (New World cotton), pæ    | 10291.65 | 1 |
| Unknown                                                                              | 95.51    | 1 |
| gb Nicotiana tabacum mRNA for 21D7, complete cds [AB001422]                          | 35.77    | 1 |
| gb AGN_RNC003xc14f1.ab1 AGN_RNC Nicotiana tabacum cDNA 5', mRNA sequenc              | 53.2     | 1 |
| tc Rep: Alpha-soluble NSF attachment protein - Solanum tuberosum (Potato), parti     | 788.69   | 1 |
| tc Rep: Chromosome chr18 scaffold_1, whole genome shotgun sequence - Vitis vin       | 256.41   | 1 |
| gb KP1B.109J17F.050727T7 KP1B Nicotiana tabacum cDNA clone KP1B.109J17, mR           | 79.58    | 1 |
| tc Rep: Chromosome chr4 scaffold_6, whole genome shotgun sequence - Vitis vinif      | 130.63   | 1 |
| gb Nicotiana tabacum mRNA for putative cytosolic cysteine synthase 7 (oas7 gene)     | 10374.1  | 1 |
| Unknown                                                                              | 335.52   | 1 |
| tc Rep: Os05g0119300 protein - Oryza sativa subsp. japonica (Rice), partial (64%) [T | 2188.3   | 1 |
| gb KF8B.100K21F.051010T7 KF8 Nicotiana tabacum cDNA clone KF8B.100K21, mRN           | 3402.71  | 1 |
| tc Rep: Chromosome chr13 scaffold_17, whole genome shotgun sequence - Vitis vi       | 89.25    | 1 |
| gb AGN_RNC128xg24f1.ab1 AGN_RNC Nicotiana tabacum cDNA 5', mRNA sequenc              | 98.08    | 1 |
| tc Rep: Auxin conjugate hydrolase - Medicago truncatula (Barrel medic), partial (56  | 56.63    | 1 |
| gb KG9B.003N01F.050720T7 KG9B Nicotiana tabacum cDNA clone KG9B.003N01, n            | 259.76   | 1 |
| tc Rep: Adenylate kinase family-like protein - Solanum tuberosum (Potato), partial   | 1574.29  | 1 |
| tc Rep: Chromosome chr8 scaffold_29, whole genome shotgun sequence - Vitis vin       | 515.71   | 1 |
| Unknown                                                                              | 105.32   | 1 |
| gb EST_FLW002xn13f1.ab1 EST_FLW Nicotiana tabacum cDNA, mRNA sequence [El            | 536.87   | 1 |
| gb KG9B.104N08F.060120T7 KG9B Nicotiana tabacum cDNA clone KG9B.104N08, n            | 164.25   | 1 |
| gb KF8B.202O24F.060124T7 KF8 Nicotiana tabacum cDNA clone KF8B.202O24, mRl           | 359.2    | 1 |
| Unknown                                                                              | 138.16   | 1 |
| tc Rep: Expressed protein - Arabidopsis thaliana (Mouse-ear cress), partial (83%) [T | 33.41    | 1 |
| Unknown                                                                              | 21.67    | 1 |



|                                                                                    |          |   |
|------------------------------------------------------------------------------------|----------|---|
| Unknown                                                                            | 27.59    | 1 |
| Unknown                                                                            | 642      | 1 |
| gb KL4B.112G06F.060131T7 KL4B Nicotiana tabacum cDNA clone KL4B.112G06, mF         | 3081.18  | 1 |
| gb KG9B.103J21F.051128T7 KG9B Nicotiana tabacum cDNA clone KG9B.103J21, mF         | 185.92   | 1 |
| gb KG9B.002J23F.050720T7 KG9B Nicotiana tabacum cDNA clone KG9B.002J23, mF         | 5446.56  | 1 |
| gb KL4B.110B23F.051106T7 KL4B Nicotiana tabacum cDNA clone KL4B.110B23, mR         | 1282.86  | 1 |
| gb AGN_RNC007xa17f1.ab1 AGN_RNC Nicotiana tabacum cDNA 5', mRNA sequenc            | 66.02    | 1 |
| tc Rep: Chromosome chr15 scaffold_37, whole genome shotgun sequence - Vitis vi     | 64.63    | 1 |
| gb KG9B.102F20F.051126T7 KG9B Nicotiana tabacum cDNA clone KG9B.102F20, m          | 20.68    | 1 |
| gb Nicotiana tabacum dehydroascorbate reductase (DHAR) mRNA, complete cds [A       | 372.9    | 1 |
| Unknown                                                                            | 524.18   | 1 |
| tc Rep: Chromosome chr5 scaffold_2, whole genome shotgun sequence - Vitis vinif    | 20902.75 | 1 |
| gb Nicotiana tabacum mRNA for nucleosome assembly protein 1 - like protein 4 [A.   | 219.81   | 1 |
| tc Rep: Developmentally regulated GTP binding protein 1 - Pisum sativum (Garden    | 93.47    | 1 |
| tc Rep: UMP/CMP kinase like protein - Arabidopsis thaliana (Mouse-ear cress), part | 23.13    | 1 |
| gb CHO_SL026xi01f1.ab1 CHO_SL Nicotiana tabacum cDNA, mRNA sequence [EH62          | 30.43    | 1 |
| tc Rep: Callus-expressing factor - Nicotiana tabacum (Common tobacco), partial (71 | 52.76    | 1 |
| Unknown                                                                            | 60.12    | 1 |
| Unknown                                                                            | 242.87   | 1 |
| gb Nicotiana tabacum mRNA for N-ethylmaleimide sensitive fusion protein, comple    | 510.54   | 1 |
| Unknown                                                                            | 28.53    | 1 |
| gb AGN_ELP006xc12f1.ab1 AGN_ELP Nicotiana tabacum cDNA 5', mRNA sequence           | 21.55    | 1 |
| Unknown                                                                            | 517.98   | 1 |
| Unknown                                                                            | 30.5     | 1 |
| gb AGN_RPC020xb05f1.ab1 AGN_RPC Nicotiana tabacum cDNA 5', mRNA sequenc            | 87.68    | 1 |
| Unknown                                                                            | 27.61    | 1 |
| gb KN6B.110B11F.060106T7 KN6B Nicotiana tabacum cDNA clone KN6B.110B11, m          | 61.75    | 1 |
| tc Rep: Chromosome chr17 scaffold_101, whole genome shotgun sequence - Vitis v     | 20.84    | 1 |
| tc Rep: Chromosome chr9 scaffold_90, whole genome shotgun sequence - Vitis vin     | 29.26    | 1 |
| gb KR3B.101J01F.051107T7 KR3B Nicotiana tabacum cDNA clone KR3B.101J01, mR         | 157.57   | 1 |
| tc Rep: Chromosome chr8 scaffold_29, whole genome shotgun sequence - Vitis vin     | 160.86   | 1 |
| Unknown                                                                            | 1592.17  | 1 |
| gb Nicotiana tabacum calreticulin mRNA, complete cds [EU984501]                    | 325.48   | 1 |
| tc Rep: Chromosome chr4 scaffold_6, whole genome shotgun sequence - Vitis vinif    | 522.47   | 1 |

|                                                                                              |          |   |
|----------------------------------------------------------------------------------------------|----------|---|
| tc Rep: Cytosolic aconitase - <i>Nicotiana tabacum</i> (Common tobacco), partial (17%) [     | 529.36   | 1 |
| gb KP1B.102B23F.050722T7 KP1B <i>Nicotiana tabacum</i> cDNA clone KP1B.102B23, ml            | 1054.5   | 1 |
| tc Rep: Eukaryotic translation initiation factor 4E - <i>Nicotiana benthamiana</i> , comple  | 187.4    | 1 |
| gb KL4B.104H02F.051104T7 KL4B <i>Nicotiana tabacum</i> cDNA clone KL4B.104H02, mF            | 25.38    | 1 |
| gb AGN_PNL230bf1_e7.trimmed.seq AGN_PNL <i>Nicotiana tabacum</i> cDNA 5', mRNA               | 53579.45 | 1 |
| tc Rep: Beta-soluble nsf attachment protein - <i>Plasmodium yoelii yoelii</i> , partial (7%) | 24.24    | 1 |
| Unknown                                                                                      | 937.47   | 1 |
| Unknown                                                                                      | 39.45    | 1 |
| Unknown                                                                                      | 7930.07  | 1 |
| gb AM788929 seedling library, SL <i>Nicotiana tabacum</i> cDNA clone nt002233046, mF         | 199.56   | 1 |
| tc Rep: Rop subfamily GTPase - <i>Nicotiana tabacum</i> (Common tobacco), partial (98%       | 4826.18  | 1 |
| Unknown                                                                                      | 84.18    | 1 |
| gb AGN_RNC126xn17f1.ab1 AGN_RNC <i>Nicotiana tabacum</i> cDNA 5', mRNA sequenc               | 20.8     | 1 |
| Unknown                                                                                      | 8729.25  | 1 |
| Unknown                                                                                      | 17.01    | 1 |
| gb AGN_RNC029xc14f1.ab1 AGN_RNC <i>Nicotiana tabacum</i> cDNA 5', mRNA sequenc               | 25.89    | 1 |
| Unknown                                                                                      | 22.81    | 1 |
| tc Rep: TA4 protein - <i>Oryza sativa</i> subsp. japonica (Rice), partial (38%) [TC51802]    | 28.43    | 1 |
| tc Rep: Aerobic azoreductase - <i>Pigmentiphaga kullae</i> , partial (8%) [TC73062]          | 832.2    | 1 |
| gb CHO_SL015xd24f2.ab1 CHO_SL <i>Nicotiana tabacum</i> cDNA, mRNA sequence [EH6              | 351.37   | 1 |
| Unknown                                                                                      | 37.18    | 1 |
| gb KF8C.103I13F.051214T7 KF8 <i>Nicotiana tabacum</i> cDNA clone KF8C.103I13, mRN            | 8545.26  | 1 |
| tc Rep: Chromosome chr9 scaffold_90, whole genome shotgun sequence - <i>Vitis vin</i>        | 78.19    | 1 |
| gb  <i>Nicotiana tabacum</i> NtFAD3 mRNA for microsomal omega-3 acid desaturase, cor         | 4840.46  | 1 |
| gb BL12.104N17F.060309T7 BL12 <i>Nicotiana tabacum</i> cDNA clone BL12.104N17, mF            | 202.37   | 1 |
| Unknown                                                                                      | 186.04   | 1 |
| gb AGN_PNL203dr1_c8.trimmed.seq AGN_PNL <i>Nicotiana tabacum</i> cDNA 3', mRNA               | 20.53    | 1 |
| gb KL4B.107L17F.051126T7 KL4B <i>Nicotiana tabacum</i> cDNA clone KL4B.107L17, mRl           | 517.37   | 1 |
| tc Rep: Senescence-associated protein-like - <i>Oryza sativa</i> subsp. japonica (Rice), pai | 539.36   | 1 |
| Unknown                                                                                      | 66.79    | 1 |
| Unknown                                                                                      | 108.53   | 1 |
| gb AM783542 seedling library, SL <i>Nicotiana tabacum</i> cDNA clone nt002007045, mF         | 141.41   | 1 |
| Unknown                                                                                      | 23.97    | 1 |
| gb CHO_SL025xj15f1.ab1 CHO_SL <i>Nicotiana tabacum</i> cDNA, mRNA sequence [EH62             | 940.27   | 1 |

|                                                                                             |         |   |
|---------------------------------------------------------------------------------------------|---------|---|
| gb Nicotiana tabacum 3-dehydroquinase dehydratase [AY578143]                                | 57.55   | 1 |
| tc Rep: Tic20-like protein - Solanum tuberosum (Potato), partial (69%) [TC70352]            | 113     | 1 |
| gb Nicotiana tabacum S-adenosyl-L-methionine synthetase (SAMS) mRNA, complete cds [AF35279] | 7368.1  | 1 |
| gb KL4B.101M16F.051103T7 KL4B Nicotiana tabacum cDNA clone KL4B.101M16, r                   | 99.36   | 1 |
| tc Rep: Chromosome undetermined scaffold_11, whole genome shotgun sequence                  | 1007.02 | 1 |
| tc Rep: Chromosome chr5 scaffold_124, whole genome shotgun sequence - Vitis vi              | 403.85  | 1 |
| Unknown                                                                                     | 235.82  | 1 |
| gb KG9B.005I19F.050721T7 KG9B Nicotiana tabacum cDNA clone KG9B.005I19, mR                  | 167.4   | 1 |
| gb CHO_SL009xe06f1.ab1 CHO_SL Nicotiana tabacum cDNA, mRNA sequence [EH6                    | 187.61  | 1 |
| gb TT-29_F01 Burley21 trichome library Nicotiana tabacum cDNA, mRNA sequence                | 26.13   | 1 |
| tc Rep: Chromosome chr11 scaffold_13, whole genome shotgun sequence - Vitis vi              | 1353.52 | 1 |
| gb KG9B.003O07F.050720T7 KG9B Nicotiana tabacum cDNA clone KG9B.003O07, r                   | 184.96  | 1 |
| gb AGN_RNC017xf14f1.ab1 AGN_RNC Nicotiana tabacum cDNA 5', mRNA sequenc                     | 36.91   | 1 |
| gb TT-22_F21 K326 late senescent leaf library Nicotiana tabacum cDNA, mRNA seq              | 153.67  | 1 |
| Unknown                                                                                     | 510.09  | 1 |
| Unknown                                                                                     | 37.66   | 1 |
| Unknown                                                                                     | 24.34   | 1 |
| tc Rep: Chromosome chr4 scaffold_6, whole genome shotgun sequence - Vitis vinif             | 138.94  | 1 |
| Unknown                                                                                     | 37.41   | 1 |
| gb Nicotiana tabacum NtMPO2 mRNA for N-methylputrescine oxidase, complete c                 | 251.64  | 1 |
| gb KR3B.108H08F.051110T7 KR3B Nicotiana tabacum cDNA clone KR3B.108H08, m                   | 341.51  | 1 |
| gb AGN_RNC109xl22r1.ab1 AGN_RNC Nicotiana tabacum cDNA 3', mRNA sequenc                     | 28.24   | 1 |
| tc Rep: Chromosome chr4 scaffold_205, whole genome shotgun sequence - Vitis vi              | 16.91   | 1 |
| gb AGN_PNL228bf1_d12.trimmed.seq AGN_PNL Nicotiana tabacum cDNA 5', mRN.                    | 176.26  | 1 |
| gb AGN_ELP018xm14f1.ab1 AGN_ELP Nicotiana tabacum cDNA 5', mRNA sequenc                     | 50.54   | 1 |
| gb KT7C.110K22F.051221T7 KT7 Nicotiana tabacum cDNA clone KT7C.110K22, mRN                  | 55.51   | 1 |
| tc Rep: Chromosome chr1 scaffold_180, whole genome shotgun sequence - Vitis vi              | 112.2   | 1 |
| tc Rep: Chromosome chr5 scaffold_67, whole genome shotgun sequence - Vitis vin              | 1374.56 | 1 |
| tc Rep: Chromosome chr1 scaffold_5, whole genome shotgun sequence - Vitis vinif             | 1138.7  | 1 |
| gb N.tabacum mRNA for ribonucleotide reductase R2 protein [X92443]                          | 246.26  | 1 |
| gb Nicotiana tabacum ankyrin-repeat protein HBP1 mRNA, complete cds [AF35279]               | 476.5   | 1 |
| Unknown                                                                                     | 124.45  | 1 |
| gb KG9B.003N18F.050720T7 KG9B Nicotiana tabacum cDNA clone KG9B.003N18, n                   | 386.23  | 1 |
| gb TT-08_E01 K326 early senescent leaf library Nicotiana tabacum cDNA, mRNA se              | 57.82   | 1 |

|                                                                                            |          |   |
|--------------------------------------------------------------------------------------------|----------|---|
| tc Rep: Chromosome chr6 scaffold_3, whole genome shotgun sequence - Vitis vinifera         | 1059.07  | 1 |
| gb KG9B.105B23F.051128T7 KG9B Nicotiana tabacum cDNA clone KG9B.105B23, mRNA sequence      | 28.76    | 1 |
| gb KR2B.101F09F.060128T7 KR2B Nicotiana tabacum cDNA clone KR2B.101F09, mRNA sequence      | 12153.3  | 1 |
| Unknown                                                                                    | 24.36    | 1 |
| gb CHO_SL016xd21f1.ab1 CHO_SL Nicotiana tabacum cDNA, mRNA sequence [EH6]                  | 528.24   | 1 |
| tc Rep: Uncharacterized protein At5g47430.2 - Arabidopsis thaliana (Mouse-ear cress)       | 81.98    | 1 |
| Unknown                                                                                    | 52.87    | 1 |
| Unknown                                                                                    | 1360.13  | 1 |
| tc Rep: Chromosome chr8 scaffold_99, whole genome shotgun sequence - Vitis vinifera        | 2937.28  | 1 |
| tc Rep: S-adenosylmethionine decarboxylase proenzyme (AdoMetDC) (SamDC) [Cc]               | 21915.05 | 1 |
| gb Nicotiana tabacum vacuolar H <sup>+</sup> -ATPase B subunit mRNA, complete cds [AF2206] | 427.57   | 1 |
| tc Rep: Polygalacturonase inhibitor protein precursor - Solanum lycopersicum (Tomato)      | 19.04    | 1 |
| tc Rep: MYST-type acetyltransferase - Solanum chacoense (Chaco potato), partial (!)        | 115.16   | 1 |
| gb TT-40_D14 K326 early senescent leaf library Nicotiana tabacum cDNA, mRNA sequence       | 884.54   | 1 |
| Unknown                                                                                    | 21.57    | 1 |
| gb KF8C.103B05F.051214T7 KF8 Nicotiana tabacum cDNA clone KF8C.103B05, mRNA sequence       | 2362.9   | 1 |
| Unknown                                                                                    | 37.08    | 1 |
| gb KF8B.202F17F.060124T7 KF8 Nicotiana tabacum cDNA clone KF8B.202F17, mRNA sequence       | 51.2     | 1 |
| gb AGN_RPC016xj21f1.ab1 AGN_RPC Nicotiana tabacum cDNA 5', mRNA sequence                   | 101.24   | 1 |
| gb KG9B.106A17F.051129T7 KG9B Nicotiana tabacum cDNA clone KG9B.106A17, mRNA sequence      | 901.45   | 1 |
| tc Rep: Chromosome chr11 scaffold_13, whole genome shotgun sequence - Vitis vinifera       | 176.49   | 1 |
| gb KR2B.109J14F.051229T7 KR2B Nicotiana tabacum cDNA clone KR2B.109J14, mRNA sequence      | 501.16   | 1 |
| gb KR2B.101B04F.060128T7 KR2B Nicotiana tabacum cDNA clone KR2B.101B04, mRNA sequence      | 9689.17  | 1 |
| tc Rep: Chromosome chr8 scaffold_29, whole genome shotgun sequence - Vitis vinifera        | 1113.7   | 1 |
| gb KP1B.103L09F.050725T7 KP1B Nicotiana tabacum cDNA clone KP1B.103L09, mRNA sequence      | 1120.87  | 1 |
| gb KP1B.102M02F.050722T7 KP1B Nicotiana tabacum cDNA clone KP1B.102M02, mRNA sequence      | 902.23   | 1 |
| gb AGN_ELP025xb18f1.ab1 AGN_ELP Nicotiana tabacum cDNA 5', mRNA sequence                   | 104.13   | 1 |
| gb AGN_PNL221af1_b5.trimmed.seq AGN_PNL Nicotiana tabacum cDNA 5', mRNA sequence           | 18608.15 | 1 |
| gb TT-30_J08 K326 late senescent leaf library Nicotiana tabacum cDNA, mRNA sequence        | 248.6    | 1 |
| gb KR2B.001N16F.050815T7 KR2B Nicotiana tabacum cDNA clone KR2B.001N16, mRNA sequence      | 5513.15  | 1 |
| tc Rep: Chromosome chr5 scaffold_64, whole genome shotgun sequence - Vitis vinifera        | 1522.73  | 1 |
| Unknown                                                                                    | 475.87   | 1 |
| Unknown                                                                                    | 137.46   | 1 |
| gb KF8C.106A19F.051215T7 KF8 Nicotiana tabacum cDNA clone KF8C.106A19, mRNA sequence       | 45.19    | 1 |

|                                                                                     |          |   |
|-------------------------------------------------------------------------------------|----------|---|
| gb KP1B.102A05F.050722T7 KP1B Nicotiana tabacum cDNA clone KP1B.102A05, m           | 99.36    | 1 |
| tc Rep: T-complex protein 1, alpha subunit - Bruguiera sexangula, partial (11%) [TC | 55.1     | 1 |
| Unknown                                                                             | 58.51    | 1 |
| gb KR3B.107H04F.051110T7 KR3B Nicotiana tabacum cDNA clone KR3B.107H04, m           | 650.69   | 1 |
| tc Rep: Chromosome chr8 scaffold_106, whole genome shotgun sequence - Vitis vi      | 112.81   | 1 |
| tc Rep: Chromosome chr19 scaffold_126, whole genome shotgun sequence - Vitis v      | 2786.73  | 1 |
| gb KG9B.102H09F.051126T7 KG9B Nicotiana tabacum cDNA clone KG9B.102H09, n           | 18.18    | 1 |
| gb KT7C.110E22F.051221T7 KT7 Nicotiana tabacum cDNA clone KT7C.110E22, mRN          | 37.76    | 1 |
| Unknown                                                                             | 583.9    | 1 |
| gb KN6B.102E21F.051230T7 KN6B Nicotiana tabacum cDNA clone KN6B.102E21, m           | 223.11   | 1 |
| gb TOBESTR046E09 TOBEST cDNA library 1 Nicotiana tabacum cDNA 5', mRNA seq          | 47.68    | 1 |
| gb Nicotiana tabacum microsomal omega-6-desaturase (FAD2) mRNA, complete cc         | 35668.25 | 1 |
| gb AGN_RNC014xp12f1.ab1 AGN_RNC Nicotiana tabacum cDNA 5', mRNA sequenc             | 70.79    | 1 |
| tc Rep: DEAD-box ATP-dependent RNA helicase 56 - Oryza sativa subsp. japonica (R    | 205.62   | 1 |
| tc Rep: 60s acidic ribosomal protein-like protein - Solanum tuberosum (Potato), pai | 4797.74  | 1 |
| gb Nicotiana tabacum cDNA-AFLP fragment H-N_BC1M33-1 sequence [DQ460062]            | 38.94    | 1 |
| gb KL4B.101O02F.051103T7 KL4B Nicotiana tabacum cDNA clone KL4B.101O02, m           | 43.96    | 1 |
| gb CHO_SL028xm03f1.ab1 CHO_SL Nicotiana tabacum cDNA, mRNA sequence [EH6            | 53.92    | 1 |
| gb TT-41_D05 K326 early senescent leaf library Nicotiana tabacum cDNA, mRNA se      | 178.62   | 1 |
| gb KT7C.106J08F.051219T7 KT7 Nicotiana tabacum cDNA clone KT7C.106J08, mRN          | 27.26    | 1 |
| tc Rep: 60s acidic ribosomal protein-like protein - Solanum tuberosum (Potato), coi | 2507.36  | 1 |
| Unknown                                                                             | 464.71   | 1 |
| gb KG9B.103H20F.051128T7 KG9B Nicotiana tabacum cDNA clone KG9B.103H20, n           | 24.66    | 1 |
| Unknown                                                                             | 34.75    | 1 |
| gb CHO_SL008xk07f1.ab1 CHO_SL Nicotiana tabacum cDNA, mRNA sequence [EH6            | 185.41   | 1 |
| tc Rep: Chromosome chr7 scaffold_31, whole genome shotgun sequence - Vitis vin      | 86.05    | 1 |
| tc Rep: Chromosome chr17 scaffold_12, whole genome shotgun sequence - Vitis vi      | 73.33    | 1 |
| tc Rep: Chromosome chr3 scaffold_8, whole genome shotgun sequence - Vitis vinif     | 367.16   | 1 |
| gb TOBESTR086A03 TOBEST cDNA library 1 Nicotiana tabacum cDNA 5', mRNA seq          | 71.52    | 1 |
| tc Rep: Chromosome chr10 scaffold_138, whole genome shotgun sequence - Vitis v      | 144.56   | 1 |
| gb Nicotiana tabacum cDNA-AFLP-fragment BSTT12-4-420, cultivar Bright Yellow 2      | 51.1     | 1 |
| tc Rep: Chromosome chr18 scaffold_1, whole genome shotgun sequence - Vitis vin      | 70.46    | 1 |
| tc Rep: Chromosome chr5 scaffold_2, whole genome shotgun sequence - Vitis vinif     | 185.76   | 1 |
| gb KT7C.101B19F.051216T7 KT7 Nicotiana tabacum cDNA clone KT7C.101B19, mRN          | 31.53    | 1 |

|                                                                                    |          |   |
|------------------------------------------------------------------------------------|----------|---|
| tc Rep: Chromosome undetermined scaffold_87, whole genome shotgun sequence         | 127.81   | 1 |
| Unknown                                                                            | 138.22   | 1 |
| tc Rep: Chromosome chr3 scaffold_8, whole genome shotgun sequence - Vitis vinif    | 1473.73  | 1 |
| tc Rep: Chromosome undetermined scaffold_296, whole genome shotgun sequenc         | 27.29    | 1 |
| gb KL4B.112C24F.060131T7 KL4B Nicotiana tabacum cDNA clone KL4B.112C24, mR         | 354.88   | 1 |
| Unknown                                                                            | 29.17    | 1 |
| gb KF8B.100B17F.051010T7 KF8 Nicotiana tabacum cDNA clone KF8B.100B17, mRN         | 51504.25 | 1 |
| gb AGN_PNL223dr1_g6.trimmed.seq AGN_PNL Nicotiana tabacum cDNA 3', mRNA            | 34.06    | 1 |
| Unknown                                                                            | 75.95    | 1 |
| Unknown                                                                            | 230.31   | 1 |
| Unknown                                                                            | 27.11    | 1 |
| Unknown                                                                            | 83.24    | 1 |
| tc Rep: DNA-binding protein - Solanum lycopersicum (Tomato) (Lycopersicon escul    | 55.29    | 1 |
| Unknown                                                                            | 99.28    | 1 |
| gb KT7C.113A06F.051221T7 KT7 Nicotiana tabacum cDNA clone KT7C.113A06, mRI         | 25.66    | 1 |
| Unknown                                                                            | 16.37    | 1 |
| gb KF8C.105O02F.051215T7 KF8 Nicotiana tabacum cDNA clone KF8C.105O02, mRI         | 100.67   | 1 |
| Unknown                                                                            | 2278.43  | 1 |
| tc Rep: Chromosome undetermined scaffold_248, whole genome shotgun sequenc         | 821.14   | 1 |
| Unknown                                                                            | 43.18    | 1 |
| gb KL4B.105L10F.051104T7 KL4B Nicotiana tabacum cDNA clone KL4B.105L10, mRI        | 3702.77  | 1 |
| gb TT-15_L06 Samsun trichome library Nicotiana tabacum cDNA, mRNA sequence [       | 32.5     | 1 |
| tc Rep: Chromosome chr2 scaffold_105, whole genome shotgun sequence - Vitis vi     | 10505.1  | 1 |
| tc Rep: Genomic DNA, chromosome 5, BAC clone:F6N7 - Arabidopsis thaliana (Mou      | 170.65   | 1 |
| tc Rep: 60S ribosomal protein L31 - Nicotiana glutinosa (Tobacco), complete [TC59: | 25.53    | 1 |
| gb Nicotiana tabacum nuclease mRNA, partial cds [AY029749]                         | 55.27    | 1 |
| Unknown                                                                            | 26.89    | 1 |
| gb FS387202 normalized full-length tobacco cDNA library Nicotiana tabacum cDNA     | 2833.51  | 1 |
| gb KL4B.105B08F.051104T7 KL4B Nicotiana tabacum cDNA clone KL4B.105B08, mR         | 1107.53  | 1 |
| Unknown                                                                            | 33.41    | 1 |
| Unknown                                                                            | 43.65    | 1 |
| Unknown                                                                            | 18.94    | 1 |
| gb Nicotiana tabacum dehydroascorbate reductase (DHAR) mRNA, complete cds [A       | 181.59   | 1 |
| gb KR3B.109I23F.051111T7 KR3B Nicotiana tabacum cDNA clone KR3B.109I23, mRI        | 101.37   | 1 |

|                                                                                            |         |   |
|--------------------------------------------------------------------------------------------|---------|---|
| gb FS405424 normalized full-length tobacco cDNA library <i>Nicotiana tabacum</i> cDNA      | 450.13  | 1 |
| gb KG9B.106M17F.051129T7 KG9B <i>Nicotiana tabacum</i> cDNA clone KG9B.106M17,             | 180.69  | 1 |
| gb AGN_RNC007xi24f1.ab1 AGN_RNC <i>Nicotiana tabacum</i> cDNA 5', mRNA sequence            | 1097.1  | 1 |
| gb TT-07_C08 K326 trichome library <i>Nicotiana tabacum</i> cDNA, mRNA sequence [FC        | 35.27   | 1 |
| Unknown                                                                                    | 1073.45 | 1 |
| gb TT-36_L19 K326 late senescent leaf library <i>Nicotiana tabacum</i> cDNA, mRNA seq      | 25.23   | 1 |
| Unknown                                                                                    | 1180.8  | 1 |
| gb KR3B.101E04F.051107T7 KR3B <i>Nicotiana tabacum</i> cDNA clone KR3B.101E04, m           | 130.15  | 1 |
| tc Rep: Chromosome chr1 scaffold_22, whole genome shotgun sequence - <i>Vitis vin</i>      | 40.58   | 1 |
| gb AGN_PNL208dr1_a3.trimmed.seq AGN_PNL <i>Nicotiana tabacum</i> cDNA 3', mRNA             | 28.64   | 1 |
| Unknown                                                                                    | 19.72   | 1 |
| gb KT7B.100G10F.051010T7 KT7 <i>Nicotiana tabacum</i> cDNA clone KT7B.100G10, mR           | 4422.62 | 1 |
| gb  <i>Nicotiana tabacum</i> S-adenosyl-L-homocysteine hydrolase (SAHH3) mRNA, parti       | 9401.12 | 1 |
| tc Rep: Bypass1 - <i>Nicotiana benthamiana</i> , partial (68%) [TC45349]                   | 1467.83 | 1 |
| tc Rep: Chromosome chr4 scaffold_6, whole genome shotgun sequence - <i>Vitis vinif</i>     | 986.22  | 1 |
| gb AGN_PNL226af1_a6.trimmed.seq AGN_PNL <i>Nicotiana tabacum</i> cDNA 5', mRNA             | 122.87  | 1 |
| gb KN6B.108P09F.060106T7 KN6B <i>Nicotiana tabacum</i> cDNA clone KN6B.108P09, r           | 265.7   | 1 |
| gb KN6B.104I03F.060103T7 KN6B <i>Nicotiana tabacum</i> cDNA clone KN6B.104I03, mF          | 28.05   | 1 |
| gb KN6B.009M09F.050901T7 KN6B <i>Nicotiana tabacum</i> cDNA clone KN6B.009M09,             | 22.72   | 1 |
| Unknown                                                                                    | 57.01   | 1 |
| Unknown                                                                                    | 20.25   | 1 |
| tc Rep: At5g44450 - <i>Arabidopsis thaliana</i> (Mouse-ear cress), partial (79%) [TC54625  | 83.83   | 1 |
| Unknown                                                                                    | 26.49   | 1 |
| tc Rep: Chromosome chr8 scaffold_34, whole genome shotgun sequence - <i>Vitis vin</i>      | 29.15   | 1 |
| gb KG9B.106J18F.051129T7 KG9B <i>Nicotiana tabacum</i> cDNA clone KG9B.106J18, mF          | 71.4    | 1 |
| tc Rep: Chromosome chr5 scaffold_2, whole genome shotgun sequence - <i>Vitis vinif</i>     | 1178.45 | 1 |
| gb TT-41_F01 K326 late senescent leaf library <i>Nicotiana tabacum</i> cDNA, mRNA seq      | 45.01   | 1 |
| Unknown                                                                                    | 549.41  | 1 |
| tc Rep: Serine/threonine protein phosphatase - <i>Vitis vinifera</i> (Grape), complete [TC | 116.83  | 1 |
| tc Rep: Chromosome chr18 scaffold_1, whole genome shotgun sequence - <i>Vitis vin</i>      | 21.06   | 1 |
| gb AGN_RPC020xk06f1.ab1 AGN_RPC <i>Nicotiana tabacum</i> cDNA 5', mRNA sequence            | 82.12   | 1 |
| tc Rep: Chromosome chr14 scaffold_9, whole genome shotgun sequence - <i>Vitis vin</i>      | 94.53   | 1 |
| gb KP1B.101L14F.050722T7 KP1B <i>Nicotiana tabacum</i> cDNA clone KP1B.101L14, mF          | 92.33   | 1 |
| tc Rep: Chromosome undetermined scaffold_324, whole genome shotgun sequenc                 | 18.19   | 1 |

|                                                                                    |         |   |
|------------------------------------------------------------------------------------|---------|---|
| Unknown                                                                            | 2165.79 | 1 |
| tc Rep: Chromosome chr2 scaffold_112, whole genome shotgun sequence - Vitis vi     | 312.98  | 1 |
| gb AGN_RNC004xo16f1.ab1 AGN_RNC Nicotiana tabacum cDNA 5', mRNA sequenc            | 46.22   | 1 |
| gb FS433138 normalized full-length tobacco cDNA library Nicotiana tabacum cDNA     | 150.83  | 1 |
| gb N.tabacum 5-enolpyruvylshikimate-3-phosphate synthase mRNA, complete cds        | 97      | 1 |
| tc Rep: Silicatein - Halichondria okadai (Marine sponge), partial (15%) [TC67373]  | 70.89   | 1 |
| gb KL4B.100B12F.050922T7 KL4B Nicotiana tabacum cDNA clone KL4B.100B12, mR         | 515.25  | 1 |
| gb KL4B.103C20F.051103T7 KL4B Nicotiana tabacum cDNA clone KL4B.103C20, mR         | 31.72   | 1 |
| tc Rep: Chromosome chr13 scaffold_48, whole genome shotgun sequence - Vitis vi     | 85.04   | 1 |
| gb AGN_PNL225df1_f4.trimmed.seq AGN_PNL Nicotiana tabacum cDNA 5', mRNA            | 265.62  | 1 |
| tc Rep: MYB transcription factor MYB173 - Glycine max (Soybean), partial (55%) [TC | 2926.33 | 1 |
| gb KP1B.001H14F.050628T7 KP1B Nicotiana tabacum cDNA clone KP1B.001H14, m          | 161.2   | 1 |
| Unknown                                                                            | 41.52   | 1 |
| gb TT-07_O15 Samsun trichome library Nicotiana tabacum cDNA, mRNA sequence         | 683.27  | 1 |
| gb CHO_SL003xc11f1.ab1 CHO_SL Nicotiana tabacum cDNA, mRNA sequence [EH6:          | 129.51  | 1 |
| Unknown                                                                            | 35.17   | 1 |
| gb KR2B.103E15F.051227T7 KR2B Nicotiana tabacum cDNA clone KR2B.103E15, ml         | 671.53  | 1 |
| gb Nicotiana tabacum nack1 mRNA for kinesin-like protein NACK1, complete cds [A    | 82.02   | 1 |
| tc Rep: Ribosomal protein L3A - Nicotiana tabacum (Common tobacco), partial (59%   | 69      | 1 |
| gb KN6B.102D04F.051230T7 KN6B Nicotiana tabacum cDNA clone KN6B.102D04, n          | 294.95  | 1 |
| Unknown                                                                            | 60.68   | 1 |
| Unknown                                                                            | 683.99  | 1 |
| tc Rep: Chromosome chr3 scaffold_117, whole genome shotgun sequence - Vitis vi     | 127.09  | 1 |
| tc Rep: Chromosome undetermined scaffold_334, whole genome shotgun sequenc         | 376.13  | 1 |
| tc Rep: Chromosome chr7 scaffold_270, whole genome shotgun sequence - Vitis vi     | 690.98  | 1 |
| tc Rep: Ubiquinol-cytochrome c reductase complex 6.7 kDa protein - Solanum tube    | 107.32  | 1 |
| tc Rep: 60S ribosomal protein L24 - Cicer arietinum (Chickpea) (Garbanzo), complet | 51.49   | 1 |
| gb AB032546 Nicotiana tabacum immature pollen grains Nicotiana tabacum cDNA        | 86.21   | 1 |
| tc Rep: Chromosome undetermined scaffold_52, whole genome shotgun sequence         | 27.61   | 1 |
| gb KR3B.111A19F.060119T7 KR3B Nicotiana tabacum cDNA clone KR3B.111A19, m          | 36.64   | 1 |
| Unknown                                                                            | 58.45   | 1 |
| tc Rep: Calcium homeostasis regulator CHoR1 - Solanum tuberosum (Potato), parti.   | 357.63  | 1 |
| tc Rep: Pollen coat-like protein - Camellia sinensis (Tea), complete [TC76886]     | 1204.66 | 1 |
| tc Rep: Chromosome chr16 scaffold_10, whole genome shotgun sequence - Vitis vi     | 97.44   | 1 |



|                                                                                        |         |   |
|----------------------------------------------------------------------------------------|---------|---|
| tc Rep: Chromosome chr4 scaffold_6, whole genome shotgun sequence - Vitis vinifera     | 207.59  | 1 |
| Unknown                                                                                | 206.99  | 1 |
| Unknown                                                                                | 204.3   | 1 |
| gb KG9B.003P21F.050720T7 KG9B Nicotiana tabacum cDNA clone KG9B.003P21, mRNA           | 38.95   | 1 |
| tc Rep: Chromosome chr11 scaffold_13, whole genome shotgun sequence - Vitis vinifera   | 59.38   | 1 |
| tc Rep: Alpha-amylase - Plantago major (Common plantain), partial (53%) [TC4459C]      | 170.84  | 1 |
| gb KP1B.101F02F.050722T7 KP1B Nicotiana tabacum cDNA clone KP1B.101F02, mRNA           | 102.39  | 1 |
| gb KF8C.103B03F.051214T7 KF8 Nicotiana tabacum cDNA clone KF8C.103B03, mRNA            | 484     | 1 |
| gb KG9B.103K21F.051128T7 KG9B Nicotiana tabacum cDNA clone KG9B.103K21, mRNA           | 40.95   | 1 |
| tc Rep: At2g43020/MFL8.12 - Arabidopsis thaliana (Mouse-ear cress), partial (38%)      | 677.97  | 1 |
| tc Rep: Chromosome chr7 scaffold_31, whole genome shotgun sequence - Vitis vinifera    | 2233    | 1 |
| gb KF8C.103P24F.051214T7 KF8 Nicotiana tabacum cDNA clone KF8C.103P24, mRNA            | 500.22  | 1 |
| gb CHO_SL027xb23f1.ab1 CHO_SL Nicotiana tabacum cDNA, mRNA sequence [EH6]              | 1670.19 | 1 |
| gb AGN_PNL229bf1_a3.trimmed.seq AGN_PNL Nicotiana tabacum cDNA 5', mRNA                | 27.4    | 1 |
| gb AGN_RPC017xc15f1.ab1 AGN_RPC Nicotiana tabacum cDNA 5', mRNA sequence               | 1557.97 | 1 |
| gb KG9B.103M11F.051128T7 KG9B Nicotiana tabacum cDNA clone KG9B.103M11, mRNA           | 92.21   | 1 |
| Unknown                                                                                | 252.12  | 1 |
| Unknown                                                                                | 55.92   | 1 |
| Unknown                                                                                | 513.22  | 1 |
| tc Rep: At2g39050/T7F6.22 - Arabidopsis thaliana (Mouse-ear cress), partial (43%)      | 1029.41 | 1 |
| tc Rep: Eukaryotic translation initiation factor 3 subunit B - Nicotiana tabacum (Cor) | 21.19   | 1 |
| tc Rep: CBL-interacting protein kinase 7 - Populus trichocarpa (Western balsam poplar) | 7991.15 | 1 |
| tc Rep: Chromosome chr13 scaffold_17, whole genome shotgun sequence - Vitis vinifera   | 37.43   | 1 |
| Unknown                                                                                | 21.56   | 1 |
| gb KG9B.001H02F.050628T7 KG9B Nicotiana tabacum cDNA clone KG9B.001H02, mRNA           | 1092.16 | 1 |
| Unknown                                                                                | 562.09  | 1 |
| gb KG9B.102D18F.051126T7 KG9B Nicotiana tabacum cDNA clone KG9B.102D18, mRNA           | 465.51  | 1 |
| gb AGN_RNC112xp19r1.ab1 AGN_RNC Nicotiana tabacum cDNA 3', mRNA sequence               | 24.52   | 1 |
| tc Rep: Chromosome chr16 scaffold_86, whole genome shotgun sequence - Vitis vinifera   | 48.85   | 1 |
| gb AGN_RNC111xd18f1.ab1 AGN_RNC Nicotiana tabacum cDNA 5', mRNA sequence               | 47.93   | 1 |
| gb AGN_RNC110xk10f1.ab1 AGN_RNC Nicotiana tabacum cDNA 5', mRNA sequence               | 38.45   | 1 |
| gb KR2B.107D18F.051229T7 KR2B Nicotiana tabacum cDNA clone KR2B.107D18, mRNA           | 253.77  | 1 |
| tc Rep: Glutathione S-transferase, class-phi - Solanum commersonii (Commerson's sedge) | 102.59  | 1 |
| tc Rep: Chromosome chr2 scaffold_105, whole genome shotgun sequence - Vitis vinifera   | 91.11   | 1 |

|                                                                                      |          |   |
|--------------------------------------------------------------------------------------|----------|---|
| tc Rep: Chromosome chr19 scaffold_4, whole genome shotgun sequence - Vitis vin       | 2702.44  | 1 |
| gb TT-34_B01 K326 late senescent leaf library Nicotiana tabacum cDNA, mRNA seq       | 135.15   | 1 |
| gb KT7C.102B03F.051216T7 KT7 Nicotiana tabacum cDNA clone KT7C.102B03, mRf           | 19.97    | 1 |
| gb KR3B.107D14F.051110T7 KR3B Nicotiana tabacum cDNA clone KR3B.107D14, m            | 829.81   | 1 |
| gb KP1B.101M16F.050722T7 KP1B Nicotiana tabacum cDNA clone KP1B.101M16, r            | 1003.66  | 1 |
| gb TT-38_G05 tobacco leaf library Nicotiana tabacum cDNA, mRNA sequence [FG6:        | 38.74    | 1 |
| tc Rep: Mitochondrial phosphate transporter - Glycine max (Soybean), partial (44%    | 5132.18  | 1 |
| gb KG9B.107K13F.060120T7 KG9B Nicotiana tabacum cDNA clone KG9B.107K13, m            | 1930.67  | 1 |
| gb KR3B.113D07F.060119T7 KR3B Nicotiana tabacum cDNA clone KR3B.113D07, m            | 173.27   | 1 |
| gb KT7C.102O08F.051216T7 KT7 Nicotiana tabacum cDNA clone KT7C.102O08, mR            | 31.89    | 1 |
| gb AGN_RNC109xb08f1.ab1 AGN_RNC Nicotiana tabacum cDNA 5', mRNA sequenc              | 200.69   | 1 |
| tc Rep: Chromosome chr14 scaffold_27, whole genome shotgun sequence - Vitis vi       | 92.16    | 1 |
| gb KF8B.200N06F.060120T7 KF8 Nicotiana tabacum cDNA clone KF8B.200N06, mRl           | 1403.18  | 1 |
| Unknown                                                                              | 3546.7   | 1 |
| tc Rep: S-adenosylmethionine synthetase - Solanum tuberosum (Potato), partial (9!    | 87.57    | 1 |
| gb KL4B.111N08F.060128T7 KL4B Nicotiana tabacum cDNA clone KL4B.111N08, mF           | 68.75    | 1 |
| gb AGN_PNL231bf1_h8.trimmed.seq AGN_PNL Nicotiana tabacum cDNA 5', mRNA              | 11263.65 | 1 |
| gb Nicotiana tabacum mRNA for nucleosome assembly protein 1 - like protein 2 [A.     | 888.66   | 1 |
| gb AGN_RPC009xn03f1.ab1 AGN_RPC Nicotiana tabacum cDNA 5', mRNA sequenc              | 98.4     | 1 |
| tc Rep: Retrovirus-related Pol polyprotein from transposon TNT 1-94 [Includes: Pro   | 20.84    | 1 |
| tc Rep: Chromosome undetermined scaffold_80, whole genome shotgun sequence           | 188.95   | 1 |
| gb KF8C.109L20F.051215T7 KF8 Nicotiana tabacum cDNA clone KF8C.109L20, mRN           | 520.02   | 1 |
| Unknown                                                                              | 260.9    | 1 |
| Unknown                                                                              | 19.97    | 1 |
| tc Rep: Chromosome chr7 scaffold_20, whole genome shotgun sequence - Vitis vin       | 94.75    | 1 |
| gb KP1B.105D21F.060116T7 KP1B Nicotiana tabacum cDNA clone KP1B.105D21, m            | 430.65   | 1 |
| tc Rep: Proteasome subunit alpha type-6 - Nicotiana tabacum (Common tobacco),        | 216.06   | 1 |
| tc Rep: Tryptophan synthase beta subunit - Persicaria tinctoria, partial (83%) [TC49 | 530.13   | 1 |
| gb KG9B.102A13F.051126T7 KG9B Nicotiana tabacum cDNA clone KG9B.102A13, n            | 59.17    | 1 |
| tc Rep: Chromosome undetermined scaffold_91, whole genome shotgun sequence           | 105.43   | 1 |
| gb KG9B.102D21F.051126T7 KG9B Nicotiana tabacum cDNA clone KG9B.102D21, n            | 107.8    | 1 |
| tc Rep: Chromosome chr6 scaffold_3, whole genome shotgun sequence - Vitis vinif      | 466.8    | 1 |
| Unknown                                                                              | 916.41   | 1 |
| Unknown                                                                              | 202.45   | 1 |

|                                                                                       |         |   |
|---------------------------------------------------------------------------------------|---------|---|
| tc Rep: Induced stolon tip protein - Capsicum annuum (Bell pepper), partial (66%) [   | 1541.12 | 1 |
| tc Rep: Chromosome undetermined scaffold_200, whole genome shotgun sequenc            | 134.11  | 1 |
| Unknown                                                                               | 47.38   | 1 |
| gb KT7C.104B12F.051219T7 KT7 Nicotiana tabacum cDNA clone KT7C.104B12, mRf            | 824.95  | 1 |
| gb KL4B.104P21F.051104T7 KL4B Nicotiana tabacum cDNA clone KL4B.104P21, mR            | 146.08  | 1 |
| Unknown                                                                               | 450.11  | 1 |
| gb AGN_RNC020xa24f1.ab1 AGN_RNC Nicotiana tabacum cDNA 5', mRNA sequenc               | 26.09   | 1 |
| gb TT-01_E10 K326 late senescent leaf library Nicotiana tabacum cDNA, mRNA seq        | 2436.48 | 1 |
| gb TT-31_K08 K326 trichome library Nicotiana tabacum cDNA, mRNA sequence [FG          | 105.77  | 1 |
| tc Rep: Shikimate kinase, chloroplast precursor - Solanum lycopersicum (Tomato) (l    | 505.08  | 1 |
| gb KF8C.101D04F.051214T7 KF8 Nicotiana tabacum cDNA clone KF8C.101D04, mRf            | 5205.75 | 1 |
| Unknown                                                                               | 22.44   | 1 |
| gb CHO_SL028xj15f1.ab1 CHO_SL Nicotiana tabacum cDNA, mRNA sequence [EH62             | 144.82  | 1 |
| tc Rep: Chromosome chr9 scaffold_104, whole genome shotgun sequence - Vitis vi        | 1539.95 | 1 |
| Unknown                                                                               | 23.95   | 1 |
| gb KP1B.101E23F.050722T7 KP1B Nicotiana tabacum cDNA clone KP1B.101E23, mF            | 34.54   | 1 |
| Unknown                                                                               | 94.3    | 1 |
| gb BL12.102O24F.060309T7 BL12 Nicotiana tabacum cDNA clone BL12.102O24, mF            | 80.15   | 1 |
| gb KL4B.112I23F.060131T7 KL4B Nicotiana tabacum cDNA clone KL4B.112I23, mRN           | 66.1    | 1 |
| tc Rep: Chromosome chr4 scaffold_39, whole genome shotgun sequence - Vitis vin        | 4194.42 | 1 |
| gb KL4B.103O05F.051103T7 KL4B Nicotiana tabacum cDNA clone KL4B.103O05, mF            | 22.95   | 1 |
| gb AGN_RPC017xo19f1.ab1 AGN_RPC Nicotiana tabacum cDNA 5', mRNA sequenc               | 238.06  | 1 |
| Unknown                                                                               | 73.62   | 1 |
| tc Rep: Quinolinate phosphoribosyltransferase - Nicotiana tabacum (Common toba        | 33.46   | 1 |
| gb AM843409 seedling library, SL Nicotiana tabacum cDNA clone nt002193022, mF         | 23.15   | 1 |
| gb KR3B.104N14F.051108T7 KR3B Nicotiana tabacum cDNA clone KR3B.104N14, m             | 35.28   | 1 |
| Unknown                                                                               | 2885.87 | 1 |
| tc Rep: Bypass2 - Nicotiana benthamiana, partial (57%) [TC58115]                      | 58.76   | 1 |
| tc Rep: Joka2 - Nicotiana plumbaginifolia (Leadwort-leaved tobacco), partial (50%)    | 120.75  | 1 |
| Unknown                                                                               | 443.7   | 1 |
| Unknown                                                                               | 139.89  | 1 |
| tc Rep: Eukaryotic translation initiation factor 3 subunit A - Nicotiana tabacum (Cor | 152.38  | 1 |
| tc Rep: Voltage-dependent anion channel - Nicotiana tabacum (Common tobacco),         | 251.03  | 1 |
| gb KG9B.103F14F.051128T7 KG9B Nicotiana tabacum cDNA clone KG9B.103F14, m             | 1038.11 | 1 |

|                                                                                                     |          |   |
|-----------------------------------------------------------------------------------------------------|----------|---|
| gb TT-28_H09 K326 late senescent leaf library <i>Nicotiana tabacum</i> cDNA, mRNA seq               | 52.55    | 1 |
| gb KG9B.105F03F.051128T7 KG9B <i>Nicotiana tabacum</i> cDNA clone KG9B.105F03, m                    | 552.41   | 1 |
| tc Rep: 50S ribosomal protein L4 - <i>Arabidopsis thaliana</i> (Mouse-ear cress), partial (7        | 44.06    | 1 |
| tc Rep: Chromosome chr15 scaffold_37, whole genome shotgun sequence - <i>Vitis vi</i>               | 249.9    | 1 |
| Unknown                                                                                             | 48.94    | 1 |
| tc Rep: Molecular chaperone Hsp90-2 - <i>Nicotiana benthamiana</i> , partial (25%) [TC47            | 2878.78  | 1 |
| tc Rep: Cellulose synthase - <i>Populus tremula</i> x <i>Populus tremuloides</i> , partial (86%) [7 | 280.63   | 1 |
| Unknown                                                                                             | 45.12    | 1 |
| Unknown                                                                                             | 49.53    | 1 |
| tc Rep: Chromosome chr2 scaffold_11, whole genome shotgun sequence - <i>Vitis vin</i>               | 182.84   | 1 |
| tc Rep: Chromosome chr9 scaffold_104, whole genome shotgun sequence - <i>Vitis vi</i>               | 244.01   | 1 |
| gb KF8C.106J03F.051215T7 KF8 <i>Nicotiana tabacum</i> cDNA clone KF8C.106J03, mRN,                  | 132.4    | 1 |
| tc Rep: Gamma hydroxybutyrate dehydrogenase - <i>Arabidopsis thaliana</i> (Mouse-ear                | 462.32   | 1 |
| tc Rep: Joka2 - <i>Nicotiana plumbaginifolia</i> (Leadwort-leaved tobacco), partial (40%)           | 226.22   | 1 |
| Unknown                                                                                             | 18.72    | 1 |
| tc GB AJ937852.1 CAI78906.1 putative glutathione S-transferase [NP8635400]                          | 197.67   | 1 |
| gb KP1B.113B11F.060117T7 KP1B <i>Nicotiana tabacum</i> cDNA clone KP1B.113B11, ml                   | 55       | 1 |
| tc Rep: Temperature-induced lipocalin - <i>Solanum lycopersicum</i> (Tomato) (Lycopers              | 139.59   | 1 |
| tc Rep: Chromosome chr2 scaffold_187, whole genome shotgun sequence - <i>Vitis vi</i>               | 23.91    | 1 |
| gb KN6B.102M07F.051230T7 KN6B <i>Nicotiana tabacum</i> cDNA clone KN6B.102M07,                      | 517.52   | 1 |
| gb KL4B.104B16F.051104T7 KL4B <i>Nicotiana tabacum</i> cDNA clone KL4B.104B16, mR                   | 30.4     | 1 |
| gb KR3B.101F04F.051107T7 KR3B <i>Nicotiana tabacum</i> cDNA clone KR3B.101F04, mF                   | 30.65    | 1 |
| Unknown                                                                                             | 41.56    | 1 |
| gb BP528807 MAT001 <i>Nicotiana tabacum</i> cDNA clone BY13673, mRNA sequence [E                    | 26.69    | 1 |
| tc Rep: Chromosome chr18 scaffold_1, whole genome shotgun sequence - <i>Vitis vin</i>               | 64.19    | 1 |
| tc Rep: Chromosome chr1 scaffold_5, whole genome shotgun sequence - <i>Vitis vinif</i>              | 180.95   | 1 |
| Unknown                                                                                             | 223.57   | 1 |
| gb KF8C.106M20F.051215T7 KF8 <i>Nicotiana tabacum</i> cDNA clone KF8C.106M20, mF                    | 66.76    | 1 |
| tc Rep: Uncharacterized protein At4g38130.2 - <i>Arabidopsis thaliana</i> (Mouse-ear cre            | 27.26    | 1 |
| gb KP1B.101K20F.050722T7 KP1B <i>Nicotiana tabacum</i> cDNA clone KP1B.101K20, ml                   | 103.23   | 1 |
| Unknown                                                                                             | 11705.25 | 1 |
| gb AGN_RNC129xp14f1.ab1 AGN_RNC <i>Nicotiana tabacum</i> cDNA 5', mRNA sequenc                      | 182.41   | 1 |
| gb FS409302 normalized full-length tobacco cDNA library <i>Nicotiana tabacum</i> cDNA               | 5984.76  | 1 |
| gb  <i>Nicotiana tabacum</i> mRNA for hypothetical protein (T407 gene) [AM851016]                   | 950.05   | 1 |

|                                                                                               |          |   |
|-----------------------------------------------------------------------------------------------|----------|---|
| gb AGN_RNC116xi22f1.ab1 AGN_RNC Nicotiana tabacum cDNA 5', mRNA sequence                      | 23.43    | 1 |
| gb EST_FLW001xi04f1.ab1 EST_FLW Nicotiana tabacum cDNA, mRNA sequence [EH62]                  | 32.42    | 1 |
| Unknown                                                                                       | 485.96   | 1 |
| gb KL4B.101O02F.051103T7 KL4B Nicotiana tabacum cDNA clone KL4B.101O02, mRNA                  | 49.46    | 1 |
| tc Rep: Chromosome chr19 scaffold_4, whole genome shotgun sequence - Vitis vinifera           | 1964.38  | 1 |
| gb TL13.105E03F.060313T7 TL13 Nicotiana tabacum cDNA clone TL13.105E03, mRNA                  | 44.59    | 1 |
| gb KF8C.101C08F.051214T7 KF8 Nicotiana tabacum cDNA clone KF8C.101C08, mRNA                   | 85.71    | 1 |
| gb KT7B.107C22F.060124T7 KT7 Nicotiana tabacum cDNA clone KT7B.107C22, mRNA                   | 21.13    | 1 |
| tc Rep: Chromosome chr12 scaffold_47, whole genome shotgun sequence - Vitis vinifera          | 148.41   | 1 |
| gb CHO_SL027xj10f1.ab1 CHO_SL Nicotiana tabacum cDNA, mRNA sequence [EH62]                    | 144.26   | 1 |
| tc Rep: Chromosome chr8 scaffold_29, whole genome shotgun sequence - Vitis vinifera           | 238.84   | 1 |
| Unknown                                                                                       | 19.62    | 1 |
| gb KG9B.003B08F.050720T7 KG9B Nicotiana tabacum cDNA clone KG9B.003B08, mRNA                  | 21.38    | 1 |
| gb KP1B.102P18F.050722T7 KP1B Nicotiana tabacum cDNA clone KP1B.102P18, mRNA                  | 909.69   | 1 |
| gb CHO_SL008xn09f1.ab1 CHO_SL Nicotiana tabacum cDNA, mRNA sequence [EH62]                    | 25.02    | 1 |
| Unknown                                                                                       | 35594.25 | 1 |
| Unknown                                                                                       | 177.77   | 1 |
| tc Rep: Nucleosome assembly protein 1-like protein 4 - Nicotiana tabacum (Common tobacco)     | 400.51   | 1 |
| gb Nicotiana tabacum WREBP-2 mRNA, complete cds [AB017694]                                    | 152.22   | 1 |
| tc Rep: Chromosome chr10 scaffold_179, whole genome shotgun sequence - Vitis vinifera         | 725.78   | 1 |
| gb KL4B.104J05F.051104T7 KL4B Nicotiana tabacum cDNA clone KL4B.104J05, mRNA                  | 82.85    | 1 |
| tc Rep: Chromosome chr1 scaffold_136, whole genome shotgun sequence - Vitis vinifera          | 4402.81  | 1 |
| tc Rep: Heat-shock protein - Arabidopsis thaliana (Mouse-ear cress), partial (52%) [AF040001] | 64.25    | 1 |
| Unknown                                                                                       | 19.07    | 1 |
| Unknown                                                                                       | 63.63    | 1 |
| gb Nicotiana tabacum partial mRNA for cullin 1C (cul1C gene) [AJ344535]                       | 91.94    | 1 |
| tc Rep: Chloroplast threonine deaminase 1 - Solanum lycopersicum (Tomato) (Lycopersicon)      | 2273.61  | 1 |
| tc Rep: Xylose isomerase - Vitis vinifera (Grape), partial (43%) [TC71501]                    | 254.12   | 1 |
| tc Rep: Chaperone GrpE type 1 - Nicotiana tabacum (Common tobacco), partial (97%)             | 72.44    | 1 |
| gb TT-35_P15 K326 trichome library Nicotiana tabacum cDNA, mRNA sequence [FG780001]           | 25.43    | 1 |
| Unknown                                                                                       | 126.37   | 1 |
| gb KL5B.118N24F.060217T7 KL5B Nicotiana tabacum cDNA clone KL5B.118N24, mRNA                  | 90.07    | 1 |
| tc Rep: Sucrose-phosphate synthase isoform B - Nicotiana tabacum (Common tobacco)             | 2919.81  | 1 |
| gb CHO_SL003xk23f1.ab1 CHO_SL Nicotiana tabacum cDNA, mRNA sequence [EH62]                    | 48.52    | 1 |

|                                                                                      |         |   |
|--------------------------------------------------------------------------------------|---------|---|
| tc Rep: Multiprotein bridging factor 1c - Solanum lycopersicum (Tomato) (Lycopers    | 1645.17 | 1 |
| gb TT-17_O12 Burley21 trichome library Nicotiana tabacum cDNA, mRNA sequence         | 144.75  | 1 |
| tc Rep: Chromosome chr8 scaffold_34, whole genome shotgun sequence - Vitis vin       | 134.82  | 1 |
| tc Rep: Chromosome chr18 scaffold_1, whole genome shotgun sequence - Vitis vin       | 179.55  | 1 |
| tc Rep: Chromosome undetermined scaffold_248, whole genome shotgun sequenc           | 105.5   | 1 |
| gb KP1B.109I14F.050727T7 KP1B Nicotiana tabacum cDNA clone KP1B.109I14, mRI          | 19.04   | 1 |
| tc Rep: Chromosome chr16 scaffold_86, whole genome shotgun sequence - Vitis vi       | 135.17  | 1 |
| tc Rep: Chromosome chr13 scaffold_17, whole genome shotgun sequence - Vitis vi       | 42.57   | 1 |
| gb TT-38_J23 tobacco leaf library Nicotiana tabacum cDNA, mRNA sequence [FG63        | 1277.45 | 1 |
| Unknown                                                                              | 24.29   | 1 |
| tc Rep: Chromosome chr16 scaffold_94, whole genome shotgun sequence - Vitis vi       | 1867.19 | 1 |
| gb KT7C.112K05F.051221T7 KT7 Nicotiana tabacum cDNA clone KT7C.112K05, mRI           | 97.77   | 1 |
| tc Rep: Hsp20.1 protein - Solanum peruvianum (Peruvian tomato) (Lycopersicon pe      | 134.79  | 1 |
| tc Rep: Chromosome chr7 scaffold_44, whole genome shotgun sequence - Vitis vin       | 511.22  | 1 |
| gb Nicotiana tabacum cDNA-AFLP-fragment BSTT12-4-420, cultivar Bright Yellow 2       | 65.75   | 1 |
| gb FS436012 normalized full-length tobacco cDNA library Nicotiana tabacum cDNA       | 56.39   | 1 |
| tc Rep: Glutathione S-transferase - Euphorbia esula (Leafy spurge), partial (87%) [T | 4373.96 | 1 |
| tc Rep: Chromosome chr13 scaffold_120, whole genome shotgun sequence - Vitis v       | 109.49  | 1 |
| Unknown                                                                              | 82.45   | 1 |
| tc Rep: Chromosome undetermined scaffold_116, whole genome shotgun sequenc           | 1593.52 | 1 |
| gb EST_FLW001xn16f1.ab1 EST_FLW Nicotiana tabacum cDNA, mRNA sequence [Ei            | 1683.3  | 1 |
| tc Rep: Chromosome chr11 scaffold_13, whole genome shotgun sequence - Vitis vi       | 549.08  | 1 |
| gb KR2B.105N22F.051227T7 KR2B Nicotiana tabacum cDNA clone KR2B.105N22, m            | 50.85   | 1 |
| tc Rep: Chromosome chr6 scaffold_3, whole genome shotgun sequence - Vitis vinif      | 316.98  | 1 |
| gb KL4B.111O19F.060128T7 KL4B Nicotiana tabacum cDNA clone KL4B.111O19, mI           | 1340.44 | 1 |
| gb Nicotiana tabacum cDNA-AFLP-fragment BSTT2-32-210, cultivar Bright Yellow 2       | 35.84   | 1 |
| gb TT-36_C17 K326 early senescent leaf library Nicotiana tabacum cDNA, mRNA se       | 552.77  | 1 |
| gb TOBESTR089A07 TOBEST cDNA library 1 Nicotiana tabacum cDNA 5', mRNA seq           | 75.6    | 1 |
| tc Rep: Ubiquitin - Hevea brasiliensis (Para rubber tree), partial (67%) [TC48522]   | 1757.97 | 1 |
| tc Rep: Myosin XI - Nicotiana tabacum (Common tobacco), partial (3%) [TC55717]       | 65.71   | 1 |
| Unknown                                                                              | 392.5   | 1 |
| tc Rep: Triosephosphate isomerase - Solanum tuberosum (Potato), partial (49%) [T     | 496.09  | 1 |
| gb Nicotiana tabacum mRNA for nucleic acid binding protein (nbp1 gene) [AJ34453      | 91.33   | 1 |
| Unknown                                                                              | 782.26  | 1 |

|                                                                                                       |          |   |
|-------------------------------------------------------------------------------------------------------|----------|---|
| gb EST_FLW005xb18f1.ab1 EST_FLW Nicotiana tabacum cDNA, mRNA sequence [Ei                             | 178.07   | 1 |
| tc Rep: Glyceraldehyde-3-phosphate dehydrogenase - Capsicum annuum (Bell pepç                         | 136.7    | 1 |
| Unknown                                                                                               | 57.13    | 1 |
| tc Rep: Lysophospholipase-like protein - Arabidopsis thaliana (Mouse-ear cress), pa                   | 968.24   | 1 |
| gb KR3B.001L06F.050815T7 KR3B Nicotiana tabacum cDNA clone KR3B.001L06, mF                            | 24.88    | 1 |
| gb KR3B.109P05F.051111T7 KR3B Nicotiana tabacum cDNA clone KR3B.109P05, mi                            | 184.48   | 1 |
| tc Rep: Magnesium dependent soluble inorganic pyrophosphatase - Solanum tuber                         | 4511.76  | 1 |
| gb KT7C.109C01F.051221T7 KT7 Nicotiana tabacum cDNA clone KT7C.109C01, mRl                            | 258.25   | 1 |
| gb TOBESTR043F12 TOBEST cDNA library 1 Nicotiana tabacum cDNA 5', mRNA seq                            | 43.01    | 1 |
| tc Rep: Chromosome chr7 scaffold_31, whole genome shotgun sequence - Vitis vin                        | 183.01   | 1 |
| tc Rep: Chromosome chr1 scaffold_5, whole genome shotgun sequence - Vitis vinif                       | 158.43   | 1 |
| gb KF8C.102O07F.051214T7 KF8 Nicotiana tabacum cDNA clone KF8C.102O07, mRl                            | 13365.8  | 1 |
| gb TT-09_F04 Samsun trichome library Nicotiana tabacum cDNA, mRNA sequence                            | 599.19   | 1 |
| tc Rep: Chromosome chr9 scaffold_33, whole genome shotgun sequence - Vitis vin                        | 14305.55 | 1 |
| Unknown                                                                                               | 56.35    | 1 |
| gb Nicotiana tabacum A31 mRNA for chromomethylase-like protein, complete cds                          | 302.5    | 1 |
| Unknown                                                                                               | 21.08    | 1 |
| tc Rep: Chromosome chr4 scaffold_6, whole genome shotgun sequence - Vitis vinif                       | 24.36    | 1 |
| Unknown                                                                                               | 30.33    | 1 |
| Unknown                                                                                               | 37.43    | 1 |
| gb KN6B.102E03F.051230T7 KN6B Nicotiana tabacum cDNA clone KN6B.102E03, m                             | 142.63   | 1 |
| Unknown                                                                                               | 43.81    | 1 |
| tc Rep: Na <sup>+</sup> /H <sup>+</sup> antiporter - Mesembryanthemum crystallinum (Common ice plant) | 88.93    | 1 |
| Unknown                                                                                               | 24.35    | 1 |
| gb Nicotiana tabacum mRNA for gibberellin 3beta-hydroxylase, complete cds [ABO:                       | 67.33    | 1 |
| Unknown                                                                                               | 30.15    | 1 |
| gb FS416927 normalized full-length tobacco cDNA library Nicotiana tabacum cDNA                        | 1218.11  | 1 |
| Unknown                                                                                               | 10048.38 | 1 |
| Unknown                                                                                               | 37.49    | 1 |
| tc Rep: Chromosome chr9 scaffold_7, whole genome shotgun sequence - Vitis vinif                       | 1094.87  | 1 |
| gb TT-12_L04 K326 late senescent leaf library Nicotiana tabacum cDNA, mRNA seq                        | 26.12    | 1 |
| gb TL13.109B21F.060320T7 TL13 Nicotiana tabacum cDNA clone TL13.109B21, mRl                           | 517.41   | 1 |
| gb KP1B.104B24F.050725T7 KP1B Nicotiana tabacum cDNA clone KP1B.104B24, mi                            | 1084.98  | 1 |
| gb KL4B.109M15F.051105T7 KL4B Nicotiana tabacum cDNA clone KL4B.109M15, r                             | 29.86    | 1 |

|                                                                                   |          |   |
|-----------------------------------------------------------------------------------|----------|---|
| tc Rep: Fructose-bisphosphate aldolase - Solanum tuberosum (Potato), partial (55% | 4218.34  | 1 |
| gb CHO_SL015xi10f2.ab1 CHO_SL Nicotiana tabacum cDNA, mRNA sequence [EH61         | 56.28    | 1 |
| tc Rep: Chromosome chr18 scaffold_1, whole genome shotgun sequence - Vitis vin    | 24.3     | 1 |
| gb CHO_SL013xb17f1.ab1 CHO_SL Nicotiana tabacum cDNA, mRNA sequence [EH6          | 2436.19  | 1 |
| gb KP1B.107I12F.050726T7 KP1B Nicotiana tabacum cDNA clone KP1B.107I12, mRI       | 274.56   | 1 |
| gb KN6B.105C09F.060104T7 KN6B Nicotiana tabacum cDNA clone KN6B.105C09, r         | 96.4     | 1 |
| Unknown                                                                           | 235.68   | 1 |
| Unknown                                                                           | 183.85   | 1 |
| Unknown                                                                           | 22.41    | 1 |
| Unknown                                                                           | 19.32    | 1 |
| tc Rep: Chromosome chr1 scaffold_180, whole genome shotgun sequence - Vitis vi    | 47.81    | 1 |
| Unknown                                                                           | 51.3     | 1 |
| Unknown                                                                           | 20.01    | 1 |
| gb BP530129 MAT005 Nicotiana tabacum cDNA clone BY21114, mRNA sequence [E         | 651.87   | 1 |
| gb KF8B.100G13F.051010T7 KF8 Nicotiana tabacum cDNA clone KF8B.100G13, mRI        | 33379.55 | 1 |
| tc Rep: Chromosome chr13 scaffold_74, whole genome shotgun sequence - Vitis vi    | 22.88    | 1 |
| Unknown                                                                           | 649.89   | 1 |
| tc Rep: Chromosome chr2 scaffold_113, whole genome shotgun sequence - Vitis vi    | 294.8    | 1 |
| gb Nicotiana tabacum NtCHI1 mRNA for chalcone isomerase, complete cds [AB213      | 19.9     | 1 |
| Unknown                                                                           | 62.91    | 1 |
| Unknown                                                                           | 639.21   | 1 |
| tc Rep: Chromosome chr17 scaffold_12, whole genome shotgun sequence - Vitis vi    | 138.75   | 1 |
| gb KF8C.110B13F.051216T7 KF8 Nicotiana tabacum cDNA clone KF8C.110B13, mRN        | 2942.77  | 1 |
| tc Rep: Chromosome chr19 scaffold_4, whole genome shotgun sequence - Vitis vin    | 1678.6   | 1 |
| gb TOBESTR098B05 TOBEST cDNA library 1 Nicotiana tabacum cDNA 5', mRNA seq        | 67414.15 | 1 |
| gb BP128854 MAT001 Nicotiana tabacum cDNA clone BY661, mRNA sequence [BP:         | 100.79   | 1 |
| gb TT-47_F05 Burley21 trichome library Nicotiana tabacum cDNA, mRNA sequence      | 463.63   | 1 |
| Unknown                                                                           | 208.88   | 1 |
| gb BP129934 MAT001 Nicotiana tabacum cDNA clone BY1843, mRNA sequence [BF         | 471.29   | 1 |
| tc Rep: Polyprotein - Solanum melongena (Eggplant) (Aubergine), partial (58%) [TC | 21.74    | 1 |
| tc Rep: Chromosome chr12 scaffold_78, whole genome shotgun sequence - Vitis vi    | 500.1    | 1 |
| gb Nicotiana tabacum calcium-dependent protein kinase-like mRNA, partial sequer   | 110.06   | 1 |
| tc Rep: SLT1 protein - Nicotiana tabacum (Common tobacco), partial (37%) [TC529   | 31.81    | 1 |
| gb KF8C.108E01F.051215T7 KF8 Nicotiana tabacum cDNA clone KF8C.108E01, mRN        | 58.27    | 1 |



|                                                                                      |         |   |
|--------------------------------------------------------------------------------------|---------|---|
| Unknown                                                                              | 1284.86 | 1 |
| tc Rep: Chromosome chr19 scaffold_4, whole genome shotgun sequence - Vitis vin       | 1052.12 | 1 |
| Unknown                                                                              | 19.58   | 1 |
| tc Rep: ATP synthase subunit d, mitochondrial - Arabidopsis thaliana (Mouse-ear cr   | 603.22  | 1 |
| tc Rep: Protein yippee-like - Solanum tuberosum (Potato), complete [TC46422]         | 20.72   | 1 |
| tc Rep: Chromosome chr18 scaffold_137, whole genome shotgun sequence - Vitis v       | 80.99   | 1 |
| tc Rep: Chromosome undetermined scaffold_133, whole genome shotgun sequenc           | 268.31  | 1 |
| tc Rep: Os07g0192300 protein - Oryza sativa subsp. japonica (Rice), partial (68%) [T | 103.99  | 1 |
| Unknown                                                                              | 24.08   | 1 |
| gb KG9B.005B15F.050721T7 KG9B Nicotiana tabacum cDNA clone KG9B.005B15, nr           | 41.56   | 1 |
| tc Rep: Chromosome chr3 scaffold_157, whole genome shotgun sequence - Vitis vi       | 58.39   | 1 |
| tc Rep: Chromosome chr11 scaffold_13, whole genome shotgun sequence - Vitis vi       | 928.02  | 1 |
| gb TT-03_C06 K326 late senescent leaf library Nicotiana tabacum cDNA, mRNA seq       | 213.11  | 1 |
| gb KF8C.108M07F.051215T7 KF8 Nicotiana tabacum cDNA clone KF8C.108M07, mF            | 31.21   | 1 |
| gb AGN_PNL226df1_e5.trimmed.seq AGN_PNL Nicotiana tabacum cDNA 5', mRNA              | 124.44  | 1 |
| Unknown                                                                              | 48.71   | 1 |
| gb KF8C.105O05F.051215T7 KF8 Nicotiana tabacum cDNA clone KF8C.105O05, mRl           | 175.95  | 1 |
| Unknown                                                                              | 582.85  | 1 |
| tc Rep: NTGP5 - Nicotiana tabacum (Common tobacco), complete [TC75301]               | 102.38  | 1 |
| gb KP1B.111O06F.060116T7 KP1B Nicotiana tabacum cDNA clone KP1B.111O06, m            | 51.3    | 1 |
| Unknown                                                                              | 50.35   | 1 |
| Unknown                                                                              | 183.62  | 1 |
| tc Rep: Chromosome chr13 scaffold_48, whole genome shotgun sequence - Vitis vi       | 262.21  | 1 |
| gb TT-10_J17 K326 late senescent leaf library Nicotiana tabacum cDNA, mRNA seq       | 24.84   | 1 |
| tc Rep: Chromosome chr3 scaffold_8, whole genome shotgun sequence - Vitis vinif      | 115.9   | 1 |
| tc Rep: Ubiquitin carrier protein - Vitis vinifera (Grape), complete [TC44653]       | 514.29  | 1 |
| tc Rep: Uncharacterized protein At4g17310.2 - Arabidopsis thaliana (Mouse-ear cre    | 25.38   | 1 |
| Unknown                                                                              | 386.31  | 1 |
| gb KR2B.115K02F.051230T7 KR2B Nicotiana tabacum cDNA clone KR2B.115K02, ml           | 227.87  | 1 |
| Unknown                                                                              | 33.81   | 1 |
| gb KP1B.001N14F.050628T7 KP1B Nicotiana tabacum cDNA clone KP1B.001N14, m            | 214.28  | 1 |
| Unknown                                                                              | 872.57  | 1 |
| gb KP1B.107P21F.050726T7 KP1B Nicotiana tabacum cDNA clone KP1B.107P21, mF           | 133.51  | 1 |
| gb AGN_ELP005xb01f1.ab1 AGN_ELP Nicotiana tabacum cDNA 5', mRNA sequence             | 36.07   | 1 |

|                                                                                |          |   |
|--------------------------------------------------------------------------------|----------|---|
| tc Rep: Chromosome chr8 scaffold_106, whole genome shotgun sequence - Vitis vi | 525.46   | 1 |
| Unknown                                                                        | 357.67   | 1 |
| gb TT-12_E09 Burley21 trichome library Nicotiana tabacum cDNA, mRNA sequence   | 64.45    | 1 |
| Unknown                                                                        | 35.4     | 1 |
| gb KP1B.110C13F.050727T7 KP1B Nicotiana tabacum cDNA clone KP1B.110C13, m      | 488.47   | 1 |
| gb KL5B.104O21F.060207T7 KL5B Nicotiana tabacum cDNA clone KL5B.104O21, m      | 1057.94  | 1 |
| gb KF8C.101M24F.051214T7 KF8 Nicotiana tabacum cDNA clone KF8C.101M24, m       | 18224.15 | 1 |
| gb KL4B.110O19F.051106T7 KL4B Nicotiana tabacum cDNA clone KL4B.110O19, m      | 38       | 1 |
| Unknown                                                                        | 989.92   | 1 |
| tc Rep: Chromosome chr3 scaffold_95, whole genome shotgun sequence - Vitis vi  | 29.16    | 1 |
| Unknown                                                                        | 522.61   | 1 |
| tc Rep: Chromosome chr13 scaffold_210, whole genome shotgun sequence - Vitis v | 766.57   | 1 |
| tc Rep: Chromosome chr11 scaffold_13, whole genome shotgun sequence - Vitis vi | 27.1     | 1 |
| Unknown                                                                        | 443.26   | 1 |
| gb AGN_RPC005xi07f1.ab1 AGN_RPC Nicotiana tabacum cDNA 5', mRNA sequence       | 280.49   | 1 |
| gb CHO_SL023xo07f1.ab1 CHO_SL Nicotiana tabacum cDNA, mRNA sequence [EH6       | 262.53   | 1 |
| tc Rep: Chromosome undetermined scaffold_168, whole genome shotgun sequenc     | 24.12    | 1 |
| tc Rep: Chromosome chr9 scaffold_104, whole genome shotgun sequence - Vitis vi | 244.29   | 1 |
| Unknown                                                                        | 35.37    | 1 |
| Unknown                                                                        | 123.64   | 1 |
| gb KG9B.106L14F.051129T7 KG9B Nicotiana tabacum cDNA clone KG9B.106L14, m      | 28.69    | 1 |
| Unknown                                                                        | 40.3     | 1 |
| tc Rep: Chromosome chr1 scaffold_136, whole genome shotgun sequence - Vitis vi | 409.56   | 1 |
| Unknown                                                                        | 19.49    | 1 |
| gb AGN_RNC006xp17f1.ab1 AGN_RNC Nicotiana tabacum cDNA 5', mRNA sequenc        | 21.72    | 1 |
| gb KP1B.111I22F.060116T7 KP1B Nicotiana tabacum cDNA clone KP1B.111I22, m      | 80.34    | 1 |
| gb AM783100 seedling library, SL Nicotiana tabacum cDNA clone nt002102024, m   | 61.25    | 1 |
| Unknown                                                                        | 20.6     | 1 |
| Unknown                                                                        | 280.24   | 1 |
| gb KL4B.102I22F.051125T7 KL4B Nicotiana tabacum cDNA clone KL4B.102I22, m      | 273.68   | 1 |
| tc Rep: Chromosome chr14 scaffold_9, whole genome shotgun sequence - Vitis vi  | 655.36   | 1 |
| tc Rep: Membrane cofactor protein precursor - Callithrix jacchus (Common marmo | 21.16    | 1 |
| gb Nicotiana tabacum cDNA-AFLP-fragment BSTT3-42-370, cultivar Bright Yellow 2 | 181.97   | 1 |
| Unknown                                                                        | 169.33   | 1 |

|                                                                                       |          |   |
|---------------------------------------------------------------------------------------|----------|---|
| Unknown                                                                               | 6521.98  | 1 |
| Unknown                                                                               | 27.25    | 1 |
| Unknown                                                                               | 905.15   | 1 |
| gb Nicotiana tabacum microsomal omega-6-desaturase (FAD2) mRNA, complete cc           | 19132.75 | 1 |
| Unknown                                                                               | 24.37    | 1 |
| gb KL4B.109F14F.051108T7 KL4B Nicotiana tabacum cDNA clone KL4B.109F14, mR            | 128.19   | 1 |
| Unknown                                                                               | 1360.66  | 1 |
| gb KF8B.201D21F.060124T7 KF8 Nicotiana tabacum cDNA clone KF8B.201D21, mRI            | 649.52   | 1 |
| tc Rep: 14-3-3 protein - Nicotiana tabacum (Common tobacco), complete [TC40215        | 18626.3  | 1 |
| Unknown                                                                               | 18.3     | 1 |
| Unknown                                                                               | 73.64    | 1 |
| gb AGN_RNC022xp13f1.ab1 AGN_RNC Nicotiana tabacum cDNA 5', mRNA sequenc               | 25.9     | 1 |
| gb TT-23_N18 K326 late senescent leaf library Nicotiana tabacum cDNA, mRNA seq        | 1685.78  | 1 |
| Unknown                                                                               | 35.63    | 1 |
| Unknown                                                                               | 23.01    | 1 |
| Unknown                                                                               | 762.18   | 1 |
| Unknown                                                                               | 327.19   | 1 |
| gb KL4B.101A09F.051103T7 KL4B Nicotiana tabacum cDNA clone KL4B.101A09, mF            | 19.4     | 1 |
| gb FS377087 normalized full-length tobacco cDNA library Nicotiana tabacum cDNA        | 53.79    | 1 |
| tc Rep: Chromosome chr4 scaffold_39, whole genome shotgun sequence - Vitis vin        | 26.34    | 1 |
| Unknown                                                                               | 93.8     | 1 |
| Unknown                                                                               | 576.93   | 1 |
| gb KP1B.109K06F.050727T7 KP1B Nicotiana tabacum cDNA clone KP1B.109K06, mI            | 51.13    | 1 |
| gb TT-08_E04 K326 early senescent leaf library Nicotiana tabacum cDNA, mRNA se        | 210      | 1 |
| gb KR3B.113P03F.060119T7 KR3B Nicotiana tabacum cDNA clone KR3B.113P03, mI            | 1850.37  | 1 |
| tc Rep: RING E3 ligase protein - Arabidopsis thaliana (Mouse-ear cress), partial (159 | 101.67   | 1 |
| gb KL4B.107P19F.051126T7 KL4B Nicotiana tabacum cDNA clone KL4B.107P19, mR            | 30.33    | 1 |
| gb KF8C.104N08F.051214T7 KF8 Nicotiana tabacum cDNA clone KF8C.104N08, mRI            | 33137.7  | 1 |
| tc Rep: Pyruvate dehydrogenase E1 beta subunit isoform 1 - Zea mays (Maize), part     | 293.48   | 1 |
| gb TT-11_H14 K326 early senescent leaf library Nicotiana tabacum cDNA, mRNA se        | 517.91   | 1 |
| gb KL4B.109L22F.051108T7 KL4B Nicotiana tabacum cDNA clone KL4B.109L22, mRI           | 28.35    | 1 |
| Unknown                                                                               | 43.61    | 1 |
| tc Rep: ARF-like small GTPase-like protein - Solanum tuberosum (Potato), complete     | 9134.44  | 1 |
| gb TT-38_F18 Samsun trichome library Nicotiana tabacum cDNA, mRNA sequence            | 18.84    | 1 |

|                                                                                  |         |   |
|----------------------------------------------------------------------------------|---------|---|
| gb KN6B.104J07F.060103T7 KN6B Nicotiana tabacum cDNA clone KN6B.104J07, mF       | 18.9    | 1 |
| tc Rep: Chromosome undetermined scaffold_203, whole genome shotgun sequenc       | 19.31   | 1 |
| Unknown                                                                          | 184.91  | 1 |
| gb FS417360 normalized full-length tobacco cDNA library Nicotiana tabacum cDNA   | 838.15  | 1 |
| tc Rep: Chromosome undetermined scaffold_203, whole genome shotgun sequenc       | 21.01   | 1 |
| gb KF8C.106K08F.051215T7 KF8 Nicotiana tabacum cDNA clone KF8C.106K08, mRN       | 87.81   | 1 |
| tc Rep: Chromosome chr8 scaffold_68, whole genome shotgun sequence - Vitis vin   | 186     | 1 |
| gb Nicotiana tabacum mRNA for NAD-dependent isocitrate dehydrogenase, clone p    | 673.82  | 1 |
| gb KT7C.106G23F.051219T7 KT7 Nicotiana tabacum cDNA clone KT7C.106G23, mR        | 502.8   | 1 |
| tc Rep: Chromosome chr18 scaffold_121, whole genome shotgun sequence - Vitis v   | 264.23  | 1 |
| Unknown                                                                          | 48.77   | 1 |
| Unknown                                                                          | 236.02  | 1 |
| Unknown                                                                          | 515.59  | 1 |
| gb KL5B.117A02F.060217T7 KL5B Nicotiana tabacum cDNA clone KL5B.117A02, mF       | 26.25   | 1 |
| Unknown                                                                          | 2998.83 | 1 |
| gb TT-09_E09 K326 late senescent leaf library Nicotiana tabacum cDNA, mRNA seq   | 19.64   | 1 |
| gb TT-01_B04 K326 trichome library Nicotiana tabacum cDNA, mRNA sequence [FC     | 136.96  | 1 |
| gb AGN_PNL228cf1_a10.trimmed.seq AGN_PNL Nicotiana tabacum cDNA 5', mRN/         | 2764.14 | 1 |
| tc Rep: Chromosome undetermined scaffold_3075, whole genome shotgun sequen       | 37.2    | 1 |
| tc Rep: Chromosome chr17 scaffold_12, whole genome shotgun sequence - Vitis vi   | 65.14   | 1 |
| gb KT7B.103C07F.060124T7 KT7 Nicotiana tabacum cDNA clone KT7B.103C07, mRI       | 1281.67 | 1 |
| tc Rep: Inorganic pyrophosphatase - Nicotiana tabacum (Common tobacco), compl    | 47.66   | 1 |
| gb KL4B.104A02F.051104T7 KL4B Nicotiana tabacum cDNA clone KL4B.104A02, mF       | 4297.26 | 1 |
| gb KL5B.114F14F.060217T7 KL5B Nicotiana tabacum cDNA clone KL5B.114F14, mR       | 30.65   | 1 |
| Unknown                                                                          | 109.9   | 1 |
| Unknown                                                                          | 22.99   | 1 |
| gb KG9B.002C07F.050720T7 KG9B Nicotiana tabacum cDNA clone KG9B.002C07, r        | 131.29  | 1 |
| gb AM816107 seedling library, SL Nicotiana tabacum cDNA clone nt002273078, mF    | 255.12  | 1 |
| tc Rep: Chromosome chr13 scaffold_48, whole genome shotgun sequence - Vitis vi   | 327.77  | 1 |
| tc Rep: Chromosome chr18 scaffold_1, whole genome shotgun sequence - Vitis vin   | 31.43   | 1 |
| Unknown                                                                          | 526.24  | 1 |
| gb TT-22_B20 K326 trichome library Nicotiana tabacum cDNA, mRNA sequence [FC     | 140.06  | 1 |
| tc Rep: Adenine phosphoribosyltransferase-like - Solanum tuberosum (Potato), con | 532.61  | 1 |
| tc Rep: Squalene monooxygenase - Datura innoxia (Downy thornapple) (Datura me    | 11233.7 | 1 |

|                                                                                   |          |   |
|-----------------------------------------------------------------------------------|----------|---|
| gb TT-08_G17 Burley21 trichome library Nicotiana tabacum cDNA, mRNA sequence      | 11692.55 | 1 |
| Unknown                                                                           | 28.65    | 1 |
| gb KR3B.104B22F.051108T7 KR3B Nicotiana tabacum cDNA clone KR3B.104B22, m         | 114.58   | 1 |
| gb AGN_RNC012xp24f1.ab1 AGN_RNC Nicotiana tabacum cDNA 5', mRNA sequenc           | 530.28   | 1 |
| tc Rep: Tocopherol cyclase - Solanum tuberosum (Potato), partial (50%) [TC52369]  | 23.34    | 1 |
| tc Rep: Chromosome chr11 scaffold_13, whole genome shotgun sequence - Vitis vi    | 500.92   | 1 |
| Unknown                                                                           | 116.55   | 1 |
| Unknown                                                                           | 31.63    | 1 |
| gb TT-06_C12 tobacco leaf library Nicotiana tabacum cDNA, mRNA sequence [FG63     | 2069.43  | 1 |
| gb CHO_SL024xf08f1.ab1 CHO_SL Nicotiana tabacum cDNA, mRNA sequence [EH62         | 147.84   | 1 |
| gb KN6B.104O01F.060103T7 KN6B Nicotiana tabacum cDNA clone KN6B.104O01, r         | 1293.13  | 1 |
| tc Rep: Citrate synthase - Nicotiana tabacum (Common tobacco), partial (50%) [TC4 | 122.17   | 1 |
| tc Rep: Chromosome chr8 scaffold_106, whole genome shotgun sequence - Vitis vi    | 863.21   | 1 |
| gb KT7C.104M15F.051219T7 KT7 Nicotiana tabacum cDNA clone KT7C.104M15, mI         | 21.37    | 1 |
| tc Rep: Chromosome chr11 scaffold_13, whole genome shotgun sequence - Vitis vi    | 109.41   | 1 |
| Unknown                                                                           | 62.56    | 1 |
| gb KL4B.103F10F.051103T7 KL4B Nicotiana tabacum cDNA clone KL4B.103F10, mR        | 4853.76  | 1 |
| gb CHO_SL026xf21f1.ab1 CHO_SL Nicotiana tabacum cDNA, mRNA sequence [EH62         | 741.36   | 1 |
| Unknown                                                                           | 26.71    | 1 |
| gb KP1B.109K02F.050727T7 KP1B Nicotiana tabacum cDNA clone KP1B.109K02, mI        | 18.73    | 1 |
| tc Rep: Chromosome chr17 scaffold_12, whole genome shotgun sequence - Vitis vi    | 551.24   | 1 |
| gb KR3B.113P20F.060119T7 KR3B Nicotiana tabacum cDNA clone KR3B.113P20, mI        | 24.93    | 1 |
| Unknown                                                                           | 91.14    | 1 |
| gb AGN_RNC019xi20f1.ab1 AGN_RNC Nicotiana tabacum cDNA 5', mRNA sequence          | 127.17   | 1 |
| gb TT-30_H11 K326 late senescent leaf library Nicotiana tabacum cDNA, mRNA seq    | 183.19   | 1 |
| gb BP526356 MAT001 Nicotiana tabacum cDNA clone BY11073, mRNA sequence [E         | 17.92    | 1 |
| gb KL4B.111O01F.060128T7 KL4B Nicotiana tabacum cDNA clone KL4B.111O01, mI        | 1168.62  | 1 |
| gb Nicotiana tabacum NtmybA2 mRNA for Myb, complete cds [AB056123]                | 61.77    | 1 |
| tc Rep: Chromosome chr3 scaffold_157, whole genome shotgun sequence - Vitis vi    | 338.83   | 1 |
| gb TT-24_J23 tobacco leaf library Nicotiana tabacum cDNA, mRNA sequence [FG63     | 172.62   | 1 |
| Unknown                                                                           | 457.82   | 1 |
| tc Rep: Chromosome undetermined scaffold_127, whole genome shotgun sequenc        | 20.66    | 1 |
| gb KG9B.001G18F.050628T7 KG9B Nicotiana tabacum cDNA clone KG9B.001G18, n         | 2709.73  | 1 |
| gb EST_FLW005xl21f1.ab1 EST_FLW Nicotiana tabacum cDNA, mRNA sequence [E-         | 294.2    | 1 |

|                                                                                   |         |   |
|-----------------------------------------------------------------------------------|---------|---|
| Unknown                                                                           | 27.44   | 1 |
| tc Rep: 40S ribosomal protein S12 - Vitis vinifera (Grape), complete [TC53841]    | 19.03   | 1 |
| tc Rep: Chromosome chr6 scaffold_3, whole genome shotgun sequence - Vitis vinif   | 454.27  | 1 |
| gb Nicotiana tabacum mRNA for nucleosome assembly protein 1 - like protein 3 [A.  | 578.6   | 1 |
| tc Rep: AN11 - Petunia hybrida (Petunia), partial (50%) [TC52222]                 | 147.61  | 1 |
| gb Nicotiana tabacum S25-PR6 mRNA, complete cds [U44760]                          | 24.94   | 1 |
| gb KL5B.115A14F.060217T7 KL5B Nicotiana tabacum cDNA clone KL5B.115A14, mF        | 168.79  | 1 |
| Unknown                                                                           | 93.43   | 1 |
| tc Rep: Uncharacterized protein At1g53880.1 - Arabidopsis thaliana (Mouse-ear cre | 45.92   | 1 |
| tc Rep: Chromosome chr5 scaffold_2, whole genome shotgun sequence - Vitis vinif   | 27.29   | 1 |
| tc Rep: Chromosome chr17 scaffold_12, whole genome shotgun sequence - Vitis vi    | 142.89  | 1 |
| Unknown                                                                           | 189.65  | 1 |
| gb AGN_RNC007xo06f1.ab1 AGN_RNC Nicotiana tabacum cDNA 5', mRNA sequenc           | 226.41  | 1 |
| Unknown                                                                           | 58.33   | 1 |
| Unknown                                                                           | 22.09   | 1 |
| gb KG9B.105C22F.051128T7 KG9B Nicotiana tabacum cDNA clone KG9B.105C22, m         | 181.22  | 1 |
| tc Rep: Chromosome chr4 scaffold_6, whole genome shotgun sequence - Vitis vinif   | 42.42   | 1 |
| tc Rep: Chromosome chr8 scaffold_34, whole genome shotgun sequence - Vitis vin    | 27.85   | 1 |
| tc Rep: Chromosome chr8 scaffold_29, whole genome shotgun sequence - Vitis vin    | 80.87   | 1 |
| tc Rep: Chromosome chr18 scaffold_1, whole genome shotgun sequence - Vitis vin    | 1630.59 | 1 |
| gb AGN_PNL226df1_d2.trimmed.seq AGN_PNL Nicotiana tabacum cDNA 5', mRNA           | 9459.27 | 1 |
| tc Rep: Chromosome chr13 scaffold_17, whole genome shotgun sequence - Vitis vi    | 236.29  | 1 |
| gb AGN_RNC116xh11f1.ab1 AGN_RNC Nicotiana tabacum cDNA 5', mRNA sequenc           | 89.04   | 1 |
| gb KR3B.001C12F.050815T7 KR3B Nicotiana tabacum cDNA clone KR3B.001C12, m         | 836.49  | 1 |
| tc Rep: Ubiquitin conjugating enzyme 2 - Solanum lycopersicum (Tomato) (Lycoper   | 154.16  | 1 |
| Unknown                                                                           | 976.19  | 1 |
| tc Rep: Chromosome chr18 scaffold_1, whole genome shotgun sequence - Vitis vin    | 22.45   | 1 |
| tc Rep: Chromosome undetermined scaffold_267, whole genome shotgun sequenc        | 468.34  | 1 |
| tc Rep: Chromosome chr5 scaffold_72, whole genome shotgun sequence - Vitis vin    | 25.18   | 1 |
| Unknown                                                                           | 55.43   | 1 |
| gb AGN_RPC005xi08f1.ab1 AGN_RPC Nicotiana tabacum cDNA 5', mRNA sequence          | 37.6    | 1 |
| gb AGN_RNC125xp24f1.ab1 AGN_RNC Nicotiana tabacum cDNA 5', mRNA sequenc           | 551.57  | 1 |
| gb KR3B.114M20F.060119T7 KR3B Nicotiana tabacum cDNA clone KR3B.114M20, r         | 1716.86 | 1 |
| gb TT-31_N23 Samsun trichome library Nicotiana tabacum cDNA, mRNA sequence        | 633.09  | 1 |

|                                                                                               |          |   |
|-----------------------------------------------------------------------------------------------|----------|---|
| Unknown                                                                                       | 1705.42  | 1 |
| gb KT7C.112P22F.051221T7 KT7 Nicotiana tabacum cDNA clone KT7C.112P22, mRNA                   | 57.46    | 1 |
| gb KF8C.105J14F.051215T7 KF8 Nicotiana tabacum cDNA clone KF8C.105J14, mRNA                   | 1805.38  | 1 |
| gb KL4B.104K06F.051104T7 KL4B Nicotiana tabacum cDNA clone KL4B.104K06, mRNA                  | 10861.5  | 1 |
| tc Rep: Pathogenesis-related homeodomain protein - Petroselinum crispum (Parsley)             | 71.03    | 1 |
| tc Rep: Arginine/serine-rich-splicing factor RSP31 - Arabidopsis thaliana (Mouse-ear cress)   | 229.4    | 1 |
| gb KF8C.102O07F.051214T7 KF8 Nicotiana tabacum cDNA clone KF8C.102O07, mRNA                   | 7703.98  | 1 |
| tc Rep: Fructose-bisphosphate aldolase - Vitis vinifera (Grape), complete [TC54270]           | 64.11    | 1 |
| gb Nicotiana tabacum ferritin 2 (Fer2) mRNA, complete cds [AY141105]                          | 80.61    | 1 |
| tc Rep: Chromosome chr9 scaffold_7, whole genome shotgun sequence - Vitis vinifera            | 1275.3   | 1 |
| gb KL4B.101B07F.051103T7 KL4B Nicotiana tabacum cDNA clone KL4B.101B07, mRNA                  | 809.81   | 1 |
| gb TT-35_J09 K326 early senescent leaf library Nicotiana tabacum cDNA, mRNA sequence          | 911.5    | 1 |
| tc Rep: Mitochondrial small heat shock protein - Solanum lycopersicum (Tomato) (Lycopersicon) | 176.03   | 1 |
| tc Rep: Chromosome chr3 scaffold_8, whole genome shotgun sequence - Vitis vinifera            | 172.7    | 1 |
| gb TT-35_I12 tobacco leaf library Nicotiana tabacum cDNA, mRNA sequence [FG63]                | 23.12    | 1 |
| gb AGN_RNC211x11f1.ab1 AGN_RNC Nicotiana tabacum cDNA 5', mRNA sequence                       | 226.16   | 1 |
| Unknown                                                                                       | 155.51   | 1 |
| gb AGN_RNC026xp05f1.ab1 AGN_RNC Nicotiana tabacum cDNA 5', mRNA sequence                      | 93.16    | 1 |
| gb KR2B.107M04F.051229T7 KR2B Nicotiana tabacum cDNA clone KR2B.107M04, mRNA                  | 27.42    | 1 |
| Unknown                                                                                       | 40.06    | 1 |
| Unknown                                                                                       | 115.36   | 1 |
| tc Rep: Mannose-6-phosphate isomerase - Vitis vinifera (Grape), partial (88%) [TC7]           | 510.91   | 1 |
| tc Rep: Chromosome chr2 scaffold_140, whole genome shotgun sequence - Vitis vinifera          | 7492.8   | 1 |
| tc Rep: Metallothionein-like protein - Nicotiana tabacum (Common tobacco), complete cds       | 35785.3  | 1 |
| tc Rep: Cycloartenol synthase - Dioscorea zingiberensis, partial (24%) [TC52278]              | 75.41    | 1 |
| tc Rep: Chromosome chr7 scaffold_20, whole genome shotgun sequence - Vitis vinifera           | 555.87   | 1 |
| tc Rep: Chromosome chr13 scaffold_48, whole genome shotgun sequence - Vitis vinifera          | 121.48   | 1 |
| Unknown                                                                                       | 10537.65 | 1 |
| tc Rep: Chromosome chr7 scaffold_44, whole genome shotgun sequence - Vitis vinifera           | 27.72    | 1 |
| gb CHO_SL016xb06f1.ab1 CHO_SL Nicotiana tabacum cDNA, mRNA sequence [EH6]                     | 517.84   | 1 |
| gb AGN_PNL230bf1_e6.trimmed.seq AGN_PNL Nicotiana tabacum cDNA 5', mRNA sequence              | 2792.52  | 1 |
| Unknown                                                                                       | 1073.68  | 1 |
| gb CHO_SL015xh02f2.ab1 CHO_SL Nicotiana tabacum cDNA, mRNA sequence [EH6]                     | 146.32   | 1 |
| gb TT-47_D17 K326 early senescent leaf library Nicotiana tabacum cDNA, mRNA sequence          | 39.58    | 1 |

|                                                                                     |          |   |
|-------------------------------------------------------------------------------------|----------|---|
| tc Rep: Chromosome chr5 scaffold_72, whole genome shotgun sequence - Vitis vin      | 41.28    | 1 |
| gb KN6B.101B06F.051230T7 KN6B Nicotiana tabacum cDNA clone KN6B.101B06, n           | 267.17   | 1 |
| gb CHO_SL013xn02f1.ab1 CHO_SL Nicotiana tabacum cDNA, mRNA sequence [EH6            | 959.76   | 1 |
| Unknown                                                                             | 414.29   | 1 |
| gb CHO_SL027xj07f1.ab1 CHO_SL Nicotiana tabacum cDNA, mRNA sequence [EH6            | 24.93    | 1 |
| gb AGN_PNL212df1_f1.trimmed.seq AGN_PNL Nicotiana tabacum cDNA 5', mRNA             | 43517.95 | 1 |
| gb 10F11 Transformed tobacco Lambda Zap II library Nicotiana tabacum cDNA 5', n     | 42.13    | 1 |
| gb KG9B.105G06F.051128T7 KG9B Nicotiana tabacum cDNA clone KG9B.105G06, n           | 52.53    | 1 |
| Unknown                                                                             | 72.05    | 1 |
| tc Rep: Chromosome chr18 scaffold_1, whole genome shotgun sequence - Vitis vin      | 79.71    | 1 |
| Unknown                                                                             | 54.72    | 1 |
| Unknown                                                                             | 107.45   | 1 |
| Unknown                                                                             | 43.47    | 1 |
| gb TT-41_E09 Samsun trichome library Nicotiana tabacum cDNA, mRNA sequence          | 105.44   | 1 |
| tc Rep: AML1 - Medicago truncatula (Barrel medic), partial (23%) [TC52177]          | 32.44    | 1 |
| gb AGN_RNC004xk06f1.ab1 AGN_RNC Nicotiana tabacum cDNA 5', mRNA sequenc             | 45.63    | 1 |
| tc Rep: Glycoprotein endopeptidase-like protein - Solanum tuberosum (Potato), co    | 56.03    | 1 |
| gb CHO_SL007xl02f1.ab1 CHO_SL Nicotiana tabacum cDNA, mRNA sequence [EH6            | 423.08   | 1 |
| Unknown                                                                             | 182.1    | 1 |
| tc Rep: Chromosome chr6 scaffold_25, whole genome shotgun sequence - Vitis vin      | 320.13   | 1 |
| Unknown                                                                             | 475.39   | 1 |
| tc Rep: Luminal-binding protein 5 precursor - Nicotiana tabacum (Common tobacc      | 8207.34  | 1 |
| Unknown                                                                             | 22.25    | 1 |
| gb KF8C.103B09F.051214T7 KF8 Nicotiana tabacum cDNA clone KF8C.103B09, mRN          | 1398.96  | 1 |
| Unknown                                                                             | 26.46    | 1 |
| tc Rep: Glutathione S-transferase GST 23 - Glycine max (Soybean), partial (89%) [TC | 1087.39  | 1 |
| Unknown                                                                             | 24.31    | 1 |
| gb BP530590 MAT005 Nicotiana tabacum cDNA clone BY22227, mRNA sequence [E           | 34.76    | 1 |
| tc Rep: N.plumbaginifolia H+-translocating ATPase mRNA - Nicotiana plumbaginifol    | 254.92   | 1 |
| tc Rep: Chromosome chr6 scaffold_25, whole genome shotgun sequence - Vitis vin      | 163.89   | 1 |
| gb N.tabacum mRNA for phosphoglycerate kinase (chloroplast isoenzyme) [Z48977       | 102.79   | 1 |
| Unknown                                                                             | 31.96    | 1 |
| tc Rep: LEA1-like protein - Capsicum annuum (Bell pepper), partial (97%) [TC51846]  | 174.21   | 1 |
| tc Rep: UDP-glucuronate decarboxylase 1 - Nicotiana tabacum (Common tobacco),       | 16284.1  | 1 |



|                                                                                 |         |   |
|---------------------------------------------------------------------------------|---------|---|
| gb KL5B.106G19F.060215T7 KL5B Nicotiana tabacum cDNA clone KL5B.106G19, mF      | 130.5   | 1 |
| gb CHO_SL024xj20f1.ab1 CHO_SL Nicotiana tabacum cDNA, mRNA sequence [EH62       | 27.56   | 1 |
| gb KL4B.111K19F.060128T7 KL4B Nicotiana tabacum cDNA clone KL4B.111K19, mR      | 103.91  | 1 |
| Unknown                                                                         | 35.97   | 1 |
| tc Rep: Mitochondrial import receptor subunit TOM20 - Solanum tuberosum (Potat  | 161.54  | 1 |
| tc Rep: Chromosome chr3 scaffold_8, whole genome shotgun sequence - Vitis vinif | 21.07   | 1 |
| gb CHO_SL018xk07f1.ab1 CHO_SL Nicotiana tabacum cDNA, mRNA sequence [EH6        | 2834.81 | 1 |
| gb KN6B.009J12F.050901T7 KN6B Nicotiana tabacum cDNA clone KN6B.009J12, mI      | 498.08  | 1 |
| Unknown                                                                         | 144.55  | 1 |
| tc Rep: Chromosome chr13 scaffold_17, whole genome shotgun sequence - Vitis vi  | 888.05  | 1 |
| tc Rep: Chromosome undetermined scaffold_87, whole genome shotgun sequence      | 49.59   | 1 |
| tc Rep: Rar1 - Nicotiana tabacum (Common tobacco), complete [TC56002]           | 17.8    | 1 |
| tc Rep: Chromosome chr4 scaffold_6, whole genome shotgun sequence - Vitis vinif | 62.01   | 1 |
| tc Rep: Chromosome chr7 scaffold_42, whole genome shotgun sequence - Vitis vin  | 34.78   | 1 |
| gb KL4B.107D11F.051126T7 KL4B Nicotiana tabacum cDNA clone KL4B.107D11, mF      | 763.12  | 1 |
| gb AGN_ELP011xp03f1.ab1 AGN_ELP Nicotiana tabacum cDNA 5', mRNA sequence        | 67.29   | 1 |
| Unknown                                                                         | 1167.27 | 1 |
| Unknown                                                                         | 186.91  | 1 |
| tc Rep: Chromosome chr11 scaffold_13, whole genome shotgun sequence - Vitis vi  | 203.21  | 1 |
| tc Rep: Chromosome chr12 scaffold_18, whole genome shotgun sequence - Vitis vi  | 56.98   | 1 |
| gb KR3B.102P15F.051107T7 KR3B Nicotiana tabacum cDNA clone KR3B.102P15, mI      | 21.04   | 1 |
| tc Rep: Sigma factor - Nicotiana tabacum (Common tobacco), complete [TC74868]   | 81.28   | 1 |
| gb FS437774 normalized full-length tobacco cDNA library Nicotiana tabacum cDNA  | 49.51   | 1 |
| gb KR2B.111C20F.060128T7 KR2B Nicotiana tabacum cDNA clone KR2B.111C20, mI      | 56.47   | 1 |
| gb TT-25_L17 K326 late senescent leaf library Nicotiana tabacum cDNA, mRNA seq  | 31.76   | 1 |
| gb KG9B.102J05F.051126T7 KG9B Nicotiana tabacum cDNA clone KG9B.102J05, mF      | 1680.74 | 1 |
| gb KR3B.101P22F.051107T7 KR3B Nicotiana tabacum cDNA clone KR3B.101P22, mI      | 1142.54 | 1 |
| tc Rep: Chromosome chr18 scaffold_1, whole genome shotgun sequence - Vitis vin  | 213.51  | 1 |
| tc Rep: Chromosome chr6 scaffold_3, whole genome shotgun sequence - Vitis vinif | 460.27  | 1 |
| gb AGN_RNC014xn24f1.ab1 AGN_RNC Nicotiana tabacum cDNA 5', mRNA sequenc         | 144.67  | 1 |
| gb Nicotiana tabacum mRNA for S-adenosyl-L-homocysteine hydrolase, complete c   | 2060.56 | 1 |
| tc Rep: Chromosome chr15 scaffold_37, whole genome shotgun sequence - Vitis vi  | 477.67  | 1 |
| gb KT7C.109J05F.051221T7 KT7 Nicotiana tabacum cDNA clone KT7C.109J05, mRN      | 876.35  | 1 |
| gb KP1B.104O18F.050725T7 KP1B Nicotiana tabacum cDNA clone KP1B.104O18, m       | 27.73   | 1 |

|                                                                                     |          |   |
|-------------------------------------------------------------------------------------|----------|---|
| gb Nicotiana tabacum PAP mRNA for purple acid phosphatase, complete cds, isolat     | 18.92    | 1 |
| gb CHO_SL005xb10f1.ab1 CHO_SL Nicotiana tabacum cDNA, mRNA sequence [EH6            | 197.7    | 1 |
| gb KG9B.103K10F.051128T7 KG9B Nicotiana tabacum cDNA clone KG9B.103K10, m           | 979.55   | 1 |
| tc Rep: Chromosome chr18 scaffold_1, whole genome shotgun sequence - Vitis vin      | 3948.44  | 1 |
| gb KP1B.001P06F.050628T7 KP1B Nicotiana tabacum cDNA clone KP1B.001P06, mI          | 4200.96  | 1 |
| Unknown                                                                             | 60.48    | 1 |
| gb KF8C.105D01F.051215T7 KF8 Nicotiana tabacum cDNA clone KF8C.105D01, mRI          | 222.27   | 1 |
| Unknown                                                                             | 165.35   | 1 |
| Unknown                                                                             | 874.55   | 1 |
| gb BP526377 MAT001 Nicotiana tabacum cDNA clone BY11094, mRNA sequence [E           | 31.32    | 1 |
| Unknown                                                                             | 4666.11  | 1 |
| gb KR3B.109H16F.051111T7 KR3B Nicotiana tabacum cDNA clone KR3B.109H16, m           | 136.42   | 1 |
| tc Rep: Chromosome chr7 scaffold_20, whole genome shotgun sequence - Vitis vin      | 88.29    | 1 |
| tc Rep: Chromosome chr8 scaffold_23, whole genome shotgun sequence - Vitis vin      | 1524.98  | 1 |
| tc Rep: Chromosome chr11 scaffold_13, whole genome shotgun sequence - Vitis vi      | 27.61    | 1 |
| gb KR3B.111D19F.060119T7 KR3B Nicotiana tabacum cDNA clone KR3B.111D19, m           | 58.24    | 1 |
| tc Rep: Predicted protein - Ostreococcus lucimarinus (strain CCE9901), partial (5%) | 4574.94  | 1 |
| tc Rep: BTF3 - Nicotiana benthamiana, complete [TC61707]                            | 45.15    | 1 |
| tc Rep: Chromosome chr4 scaffold_6, whole genome shotgun sequence - Vitis vinif     | 2405.12  | 1 |
| gb KL4B.105A09F.051104T7 KL4B Nicotiana tabacum cDNA clone KL4B.105A09, mF          | 249.64   | 1 |
| Unknown                                                                             | 30.7     | 1 |
| tc Rep: Clp protease 2 proteolytic subunit precursor - Solanum lycopersicum (Toma   | 55.62    | 1 |
| Unknown                                                                             | 65.09    | 1 |
| gb TT-36_C22 Burley21 trichome library Nicotiana tabacum cDNA, mRNA sequence        | 17.13    | 1 |
| gb KL4B.113D18F.060131T7 KL4B Nicotiana tabacum cDNA clone KL4B.113D18, mF          | 63.87    | 1 |
| gb KG9B.102P17F.051126T7 KG9B Nicotiana tabacum cDNA clone KG9B.102P17, m           | 252.77   | 1 |
| tc Rep: Chromosome chr2 scaffold_105, whole genome shotgun sequence - Vitis vi      | 10181.39 | 1 |
| gb KT7C.104I04F.051219T7 KT7 Nicotiana tabacum cDNA clone KT7C.104I04, mRN/         | 1026.47  | 1 |
| Unknown                                                                             | 26.36    | 1 |
| gb Nicotiana tabacum 3-dehydroquinatase [AY578144]                                  | 250.21   | 1 |
| Unknown                                                                             | 50.34    | 1 |
| gb KG9B.001H23F.050628T7 KG9B Nicotiana tabacum cDNA clone KG9B.001H23, n           | 54.21    | 1 |
| Unknown                                                                             | 93.82    | 1 |
| tc Rep: Chromosome undetermined scaffold_254, whole genome shotgun sequenc          | 4739.07  | 1 |

|                                                                                      |         |   |
|--------------------------------------------------------------------------------------|---------|---|
| gb Nicotiana tabacum blp2 mRNA for luminal binding protein (BiP), partial [X60059    | 8250.76 | 1 |
| tc Rep: Peptide methionine sulfoxide reductase (Protein- methionine-S-oxide redu     | 27.53   | 1 |
| tc Rep: Aspartate aminotransferase - Vitis vinifera (Grape), partial (53%) [TC40773] | 79.88   | 1 |
| gb Nicotiana tabacum TBK11 mRNA for kinesin-like polypeptides 11, partial cds [AE    | 79.63   | 1 |
| tc Rep: ALY protein - Nicotiana benthamiana, partial (37%) [TC59866]                 | 449.81  | 1 |
| tc Rep: S-adenosylmethionine synthetase - Nicotiana suaveolens, partial (24%) [TC    | 1007.98 | 1 |
| tc Rep: Chromosome chr14 scaffold_27, whole genome shotgun sequence - Vitis vi       | 25.58   | 1 |
| Unknown                                                                              | 61.38   | 1 |
| gb AGN_RNC024xl08f1.ab1 AGN_RNC Nicotiana tabacum cDNA 5', mRNA sequenc              | 44.69   | 1 |
| gb KG9B.102L21F.051126T7 KG9B Nicotiana tabacum cDNA clone KG9B.102L21, m            | 79.03   | 1 |
| Unknown                                                                              | 28.78   | 1 |
| Unknown                                                                              | 112.07  | 1 |
| Unknown                                                                              | 32.07   | 1 |
| Unknown                                                                              | 263.94  | 1 |
| Unknown                                                                              | 18150.3 | 1 |
| Unknown                                                                              | 747.96  | 1 |
| tc Rep: Carotenoid cleavage dioxygenase 1B - Solanum lycopersicum (Tomato) (Lyc      | 121.18  | 1 |
| Unknown                                                                              | 32.04   | 1 |
| gb AGN_RNC012xh02f1.ab1 AGN_RNC Nicotiana tabacum cDNA 5', mRNA sequenc              | 71.47   | 1 |
| gb KN6B.104F22F.060103T7 KN6B Nicotiana tabacum cDNA clone KN6B.104F22, m            | 32.29   | 1 |
| gb Nicotiana tabacum mRNA for ras-related protein RAB8-4, complete cds [AB079C       | 3290.49 | 1 |
| gb ntsm9 embryogenic microspores Nicotiana tabacum cDNA, mRNA sequence [EB           | 86.63   | 1 |
| Unknown                                                                              | 252.2   | 1 |
| tc Rep: Protein kinase CK2 alpha subunit - Nicotiana tabacum (Common tobacco), c     | 190.69  | 1 |
| gb KP1B.037P02F.050628T7 KP1B Nicotiana tabacum cDNA clone KP1B.037P02, m            | 184.74  | 1 |
| Unknown                                                                              | 22.96   | 1 |
| Unknown                                                                              | 87.92   | 1 |
| tc Rep: Malonyl-CoA:ACP transacylase - Perilla frutescens (Beefsteak plant) (Chines  | 141.75  | 1 |
| tc Rep: Chromosome chr13 scaffold_48, whole genome shotgun sequence - Vitis vi       | 411.07  | 1 |
| tc Rep: Chromosome chr14 scaffold_54, whole genome shotgun sequence - Vitis vi       | 797.16  | 1 |
| Unknown                                                                              | 66.29   | 1 |
| tc Rep: Chromosome chr1 scaffold_46, whole genome shotgun sequence - Vitis vin       | 528.28  | 1 |
| Unknown                                                                              | 46.15   | 1 |
| tc Rep: Ubiquitin carrier protein - Nicotiana benthamiana, complete [TC50166]        | 130.55  | 1 |

|                                                                                      |          |   |
|--------------------------------------------------------------------------------------|----------|---|
| gb Nicotiana tabacum calcium [AF435452]                                              | 71.04    | 1 |
| gb KF8B.202G14F.060124T7 KF8 Nicotiana tabacum cDNA clone KF8B.202G14, mRI           | 44.22    | 1 |
| gb KG9B.105N12F.051128T7 KG9B Nicotiana tabacum cDNA clone KG9B.105N12, n            | 70.98    | 1 |
| tc Rep: Aldehyde dehydrogenase family 7 member A1 - Euphorbia characias (Spurg       | 106.7    | 1 |
| Unknown                                                                              | 24.51    | 1 |
| tc Rep: Chromosome undetermined scaffold_107, whole genome shotgun sequenc           | 40.11    | 1 |
| gb CHO_SL014xo09f1.ab1 CHO_SL Nicotiana tabacum cDNA, mRNA sequence [EH6             | 17.3     | 1 |
| Unknown                                                                              | 23.9     | 1 |
| tc Rep: Syntaxin-like protein - Solanum tuberosum (Potato), partial (44%) [TC46626   | 1077.73  | 1 |
| gb KG9B.003C10F.050720T7 KG9B Nicotiana tabacum cDNA clone KG9B.003C10, r            | 43.45    | 1 |
| tc Rep: Chromosome chr4 scaffold_6, whole genome shotgun sequence - Vitis vinif      | 502.6    | 1 |
| tc Rep: Avr9/Cf-9 rapidly elicited protein 31 - Nicotiana tabacum (Common tobaccc    | 74.96    | 1 |
| tc Rep: RNA-binding gricine-rich protein-1 - Nicotiana sylvestris (Wood tobacco), cc | 17174.15 | 1 |
| Unknown                                                                              | 26.22    | 1 |
| Unknown                                                                              | 42.86    | 1 |
| Unknown                                                                              | 466.72   | 1 |
| gb KT7C.102N05F.051216T7 KT7 Nicotiana tabacum cDNA clone KT7C.102N05, mR            | 32.16    | 1 |
| Unknown                                                                              | 173.61   | 1 |
| gb TOBESTR011H07 TOBEST cDNA library 1 Nicotiana tabacum cDNA 5', mRNA seq           | 14454.35 | 1 |
| gb TT-20_O05 K326 late senescent leaf library Nicotiana tabacum cDNA, mRNA seq       | 188.91   | 1 |
| gb Nicotiana tabacum partial mRNA for putative rac protein (rac3 gene) [AJ496227     | 22.22    | 1 |
| gb CHO_SL012xf09f1.ab1 CHO_SL Nicotiana tabacum cDNA, mRNA sequence [EH6:            | 21.86    | 1 |
| gb Nicotiana tabacum cDNA-AFLP-fragment BSTT22-430, cultivar Bright Yellow 2 [A      | 1642.58  | 1 |
| Unknown                                                                              | 266.83   | 1 |
| gb KF8C.105N24F.051215T7 KF8 Nicotiana tabacum cDNA clone KF8C.105N24, mRI           | 278.56   | 1 |
| tc Rep: Chromosome chr13 scaffold_210, whole genome shotgun sequence - Vitis \       | 373.76   | 1 |
| Unknown                                                                              | 1121.38  | 1 |
| tc Rep: Chromosome chr15 scaffold_40, whole genome shotgun sequence - Vitis vi       | 30.91    | 1 |
| Unknown                                                                              | 28.14    | 1 |
| gb CHO_SL013xf01f1.ab1 CHO_SL Nicotiana tabacum cDNA, mRNA sequence [EH6:            | 259.77   | 1 |
| Unknown                                                                              | 845.5    | 1 |
| tc Rep: Chromosome chr8 scaffold_99, whole genome shotgun sequence - Vitis vin       | 320.59   | 1 |
| gb AGN_RPC015xi06f1.ab1 AGN_RPC Nicotiana tabacum cDNA 5', mRNA sequence             | 37.06    | 1 |
| tc Rep: Chromosome chr11 scaffold_13, whole genome shotgun sequence - Vitis vi       | 63.16    | 1 |

|                                                                                      |         |   |
|--------------------------------------------------------------------------------------|---------|---|
| gb KN6B.101C02F.051230T7 KN6B Nicotiana tabacum cDNA clone KN6B.101C02, r            | 468.8   | 1 |
| tc Rep: Chromosome chr13 scaffold_17, whole genome shotgun sequence - Vitis vi       | 151.6   | 1 |
| tc Rep: Chromosome chr12 scaffold_36, whole genome shotgun sequence - Vitis vi       | 34.97   | 1 |
| gb TT-16_E09 Burley21 trichome library Nicotiana tabacum cDNA, mRNA sequence         | 764.17  | 1 |
| Unknown                                                                              | 6663.42 | 1 |
| tc Rep: Chromosome chr17 scaffold_16, whole genome shotgun sequence - Vitis vi       | 23.99   | 1 |
| Unknown                                                                              | 19.34   | 1 |
| tc Rep: Chromosome chr6 scaffold_3, whole genome shotgun sequence - Vitis vinif      | 149.07  | 1 |
| tc Rep: Chromosome chr8 scaffold_23, whole genome shotgun sequence - Vitis vin       | 185.65  | 1 |
| gb TT-19_E12 K326 trichome library Nicotiana tabacum cDNA, mRNA sequence [FG         | 210.34  | 1 |
| Unknown                                                                              | 170.88  | 1 |
| gb KG9B.102F14F.051126T7 KG9B Nicotiana tabacum cDNA clone KG9B.102F14, m            | 129.29  | 1 |
| gb KP1B.109D18F.050727T7 KP1B Nicotiana tabacum cDNA clone KP1B.109D18, m            | 2862.21 | 1 |
| tc Rep: Pantothenate kinase 2 - Arabidopsis thaliana (Mouse-ear cress), partial (56% | 49.18   | 1 |
| Unknown                                                                              | 22.87   | 1 |
| Unknown                                                                              | 18.57   | 1 |
| gb KT7C.108O12F.051219T7 KT7 Nicotiana tabacum cDNA clone KT7C.108O12, mR            | 33.11   | 1 |
| gb AGN_PNL224bf1_a9.trimmed.seq AGN_PNL Nicotiana tabacum cDNA 5', mRNA              | 9412.87 | 1 |
| Unknown                                                                              | 85.78   | 1 |
| Unknown                                                                              | 21.38   | 1 |
| tc Rep: Ribosomal protein L11-like - Nicotiana tabacum (Common tobacco), compl       | 24.29   | 1 |
| Unknown                                                                              | 39.01   | 1 |
| Unknown                                                                              | 100.52  | 1 |
| gb EST_FLW001xi04f1.ab1 EST_FLW Nicotiana tabacum cDNA, mRNA sequence [E             | 101.27  | 1 |
| Unknown                                                                              | 162.45  | 1 |
| gb Nicotiana tabacum mRNA for chloroplast FtsZ-like protein (ftsZ gene), clone Ftsz  | 86.21   | 1 |
| gb AGN_RNC019xc18f1.ab1 AGN_RNC Nicotiana tabacum cDNA 5', mRNA sequenc              | 50.22   | 1 |
| gb KT7C.104N24F.051219T7 KT7 Nicotiana tabacum cDNA clone KT7C.104N24, mR            | 97.15   | 1 |
| gb CHO_SL014xb10f1.ab1 CHO_SL Nicotiana tabacum cDNA, mRNA sequence [EH6             | 1243.11 | 1 |
| gb AGN_PNL221cr1_g7.trimmed.seq AGN_PNL Nicotiana tabacum cDNA 3', mRNA              | 139.51  | 1 |
| Unknown                                                                              | 953.02  | 1 |
| tc Rep: Probable pectate lyase P59 precursor - Solanum lycopersicum (Tomato) (Ly     | 11548.7 | 1 |
| tc Rep: MYB transcription factor MYB123 - Glycine max (Soybean), partial (29%) [T    | 25.88   | 1 |
| tc Rep: Protein kinase MK5 - Mesembryanthemum crystallinum (Common ice plant         | 272.63  | 1 |

|                                                                                       |         |   |
|---------------------------------------------------------------------------------------|---------|---|
| tc Rep: Chromosome undetermined scaffold_130, whole genome shotgun sequenc            | 30.16   | 1 |
| gb FS407656 normalized full-length tobacco cDNA library Nicotiana tabacum cDNA        | 2617.54 | 1 |
| gb TT-03_J18 K326 early senescent leaf library Nicotiana tabacum cDNA, mRNA sec       | 182.69  | 1 |
| Unknown                                                                               | 54.96   | 1 |
| gb KT7C.109P07F.051221T7 KT7 Nicotiana tabacum cDNA clone KT7C.109P07, mRN            | 113.91  | 1 |
| gb KT7C.106N03F.051219T7 KT7 Nicotiana tabacum cDNA clone KT7C.106N03, mR             | 17.63   | 1 |
| Unknown                                                                               | 213.96  | 1 |
| tc Rep: Ultraviolet hypersensitive 1 - Arabidopsis thaliana (Mouse-ear cress), partia | 41.06   | 1 |
| gb TT-12_L23 Samsun trichome library Nicotiana tabacum cDNA, mRNA sequence [          | 903.33  | 1 |
| gb AGN_RNC024xc18f1.ab1 AGN_RNC Nicotiana tabacum cDNA 5', mRNA sequenc               | 2212.81 | 1 |
| tc Rep: Chromosome chr7 scaffold_42, whole genome shotgun sequence - Vitis vin        | 24.66   | 1 |
| Unknown                                                                               | 124.9   | 1 |
| Unknown                                                                               | 104.16  | 1 |
| tc Rep: Potyviral helper component protease-interacting protein 2 - Solanum tuber     | 298.71  | 1 |
| tc Rep: Chromosome chr18 scaffold_1, whole genome shotgun sequence - Vitis vin        | 117.87  | 1 |
| Unknown                                                                               | 4076.58 | 1 |
| tc Rep: Chromosome chr15 scaffold_19, whole genome shotgun sequence - Vitis vi        | 147.43  | 1 |
| gb AGN_RNC129xf15r1.ab1 AGN_RNC Nicotiana tabacum cDNA 3', mRNA sequenc               | 21.09   | 1 |
| tc Rep: RPN9 - Nicotiana benthamiana, complete [TC56014]                              | 43.38   | 1 |
| Unknown                                                                               | 20.71   | 1 |
| tc Rep: Chromosome undetermined scaffold_186, whole genome shotgun sequenc            | 39.18   | 1 |
| Unknown                                                                               | 104.24  | 1 |
| gb KT7C.110C06F.051221T7 KT7 Nicotiana tabacum cDNA clone KT7C.110C06, mRN            | 26.76   | 1 |
| tc Rep: Callus-expressing factor - Nicotiana tabacum (Common tobacco), partial (5C    | 179.93  | 1 |
| gb TT-34_J22 Samsun trichome library Nicotiana tabacum cDNA, mRNA sequence [          | 271.87  | 1 |
| Unknown                                                                               | 3060.29 | 1 |
| gb KR2B.115K02F.051230T7 KR2B Nicotiana tabacum cDNA clone KR2B.115K02, mi            | 109.89  | 1 |
| tc Rep: Chromosome chr15 scaffold_19, whole genome shotgun sequence - Vitis vi        | 21.59   | 1 |
| gb AGN_ELP007xo11f1.ab1 AGN_ELP Nicotiana tabacum cDNA 5', mRNA sequence              | 19.83   | 1 |
| tc Rep: RBX1-like protein - Petunia integrifolia subsp. inflata, complete [TC53068]   | 389.68  | 1 |
| gb CHO_SL005xb10f1.ab1 CHO_SL Nicotiana tabacum cDNA, mRNA sequence [EH6              | 106.62  | 1 |
| gb KP1B.109I14F.050727T7 KP1B Nicotiana tabacum cDNA clone KP1B.109I14, mRI           | 17.24   | 1 |
| gb AM828261 DL, diurnal library Nicotiana tabacum cDNA clone nt005224018, mRI         | 586.36  | 1 |
| gb EST_YP002xo15f1.ab1 EST_YP Nicotiana tabacum cDNA, mRNA sequence [EH61             | 35.52   | 1 |

|                                                                                    |         |   |
|------------------------------------------------------------------------------------|---------|---|
| gb KN6B.115L21F.060127T7 KN6B Nicotiana tabacum cDNA clone KN6B.115L21, m          | 414.31  | 1 |
| Unknown                                                                            | 80.37   | 1 |
| gb KT7C.112F11F.051221T7 KT7 Nicotiana tabacum cDNA clone KT7C.112F11, mRN         | 1431.94 | 1 |
| Unknown                                                                            | 41.94   | 1 |
| gb KP1B.102F06F.050722T7 KP1B Nicotiana tabacum cDNA clone KP1B.102F06, mF         | 1360.97 | 1 |
| gb Nicotiana tabacum osmotic stress-activated protein kinase (OSAK) mRNA, comp     | 112.34  | 1 |
| tc Rep: Regulator of gene silencing - Nicotiana tabacum (Common tobacco), partial  | 27.91   | 1 |
| Unknown                                                                            | 163.15  | 1 |
| gb AGN_RPC015xn07f1.ab1 AGN_RPC Nicotiana tabacum cDNA 5', mRNA sequenc            | 25.11   | 1 |
| gb KT7C.106N04F.051219T7 KT7 Nicotiana tabacum cDNA clone KT7C.106N04, mR          | 135.02  | 1 |
| gb AM838831 seedling library, SL Nicotiana tabacum cDNA clone nt002239060, mF      | 29.73   | 1 |
| tc Rep: Cytochrome b-c1 complex subunit Rieske-5, mitochondrial precursor - Nico   | 8162.59 | 1 |
| gb FS416760 normalized full-length tobacco cDNA library Nicotiana tabacum cDNA     | 112.52  | 1 |
| gb AGN_PNL221af1_e9.trimmed.seq AGN_PNL Nicotiana tabacum cDNA 5', mRNA            | 879.45  | 1 |
| tc Rep: Chromosome chr18 scaffold_137, whole genome shotgun sequence - Vitis v     | 69.5    | 1 |
| tc Rep: Small GTPase Rab2 - Nicotiana tabacum (Common tobacco), complete [TC5      | 349.89  | 1 |
| tc Rep: Ammonium transporter 1 member 1 - Solanum lycopersicum (Tomato) (Lyc       | 7860.53 | 1 |
| Unknown                                                                            | 32.6    | 1 |
| tc Rep: Chromosome chr4 scaffold_6, whole genome shotgun sequence - Vitis vinif    | 122.82  | 1 |
| tc Rep: Chromosome chr19 scaffold_66, whole genome shotgun sequence - Vitis vi     | 242.47  | 1 |
| gb AM799615 seedling library, SL Nicotiana tabacum cDNA clone nt002172018, mF      | 28.32   | 1 |
| gb KL4B.104L10F.051104T7 KL4B Nicotiana tabacum cDNA clone KL4B.104L10, mRI        | 37.88   | 1 |
| gb BP534904 MAT005 Nicotiana tabacum cDNA clone BY34113, mRNA sequence [E          | 418.49  | 1 |
| gb KT7C.105B20F.051219T7 KT7 Nicotiana tabacum cDNA clone KT7C.105B20, mRI         | 69.92   | 1 |
| gb Nicotiana tabacum cDNA-AFLP-fragment BSTC31-2-190, cultivar Bright Yellow 2     | 51.34   | 1 |
| gb KG9B.103M20F.051128T7 KG9B Nicotiana tabacum cDNA clone KG9B.103M20,            | 801.21  | 1 |
| gb KT7C.112I04F.051221T7 KT7 Nicotiana tabacum cDNA clone KT7C.112I04, mRN/        | 59.83   | 1 |
| gb AGN_RPC002xi06f1.ab1 AGN_RPC Nicotiana tabacum cDNA 5', mRNA sequence           | 181.42  | 1 |
| tc Rep: Chromosome chr19 scaffold_4, whole genome shotgun sequence - Vitis vin     | 44.22   | 1 |
| tc Rep: Thioredoxin peroxidase - Nicotiana tabacum (Common tobacco), complete      | 39.47   | 1 |
| gb TT-08_O21 K326 late senescent leaf library Nicotiana tabacum cDNA, mRNA seq     | 58.84   | 1 |
| tc Rep: Actin - Nicotiana tabacum (Common tobacco), complete [TC53994]             | 5988.99 | 1 |
| gb AGN_RNC118xp08f1.ab1 AGN_RNC Nicotiana tabacum cDNA 5', mRNA sequenc            | 88.3    | 1 |
| tc Rep: 1-aminocyclopropane-1-carboxylate oxidase 3 - Petunia hybrida (Petunia), p | 28.75   | 1 |

|                                                                                      |         |   |
|--------------------------------------------------------------------------------------|---------|---|
| gb KL4B.107H24F.051126T7 KL4B Nicotiana tabacum cDNA clone KL4B.107H24, mF           | 21.96   | 1 |
| gb AM842133 COL, cold overnight library Nicotiana tabacum cDNA clone nt006001        | 31.02   | 1 |
| Unknown                                                                              | 44.98   | 1 |
| Unknown                                                                              | 180.28  | 1 |
| gb AM818734 COL, cold overnight library Nicotiana tabacum cDNA clone nt006087        | 98.89   | 1 |
| gb KG9B.104B06F.060120T7 KG9B Nicotiana tabacum cDNA clone KG9B.104B06, r            | 101.74  | 1 |
| tc Rep: Chromosome chr10 scaffold_179, whole genome shotgun sequence - Vitis v       | 131.35  | 1 |
| Unknown                                                                              | 23.24   | 1 |
| tc Rep: Chromosome chr19 scaffold_4, whole genome shotgun sequence - Vitis vin       | 2343.99 | 1 |
| tc Rep: Sulfate adenylyltransferase - Solanum tuberosum (Potato), partial (37%) [T   | 4138.03 | 1 |
| tc Rep: Chromosome chr11 scaffold_13, whole genome shotgun sequence - Vitis vi       | 379.33  | 1 |
| tc Rep: Chromosome chr4 scaffold_6, whole genome shotgun sequence - Vitis vinif      | 101.11  | 1 |
| tc Rep: Chromosome chr19 scaffold_4, whole genome shotgun sequence - Vitis vin       | 60.85   | 1 |
| gb AGN_RNC021xj04f1.ab1 AGN_RNC Nicotiana tabacum cDNA 5', mRNA sequence             | 22.34   | 1 |
| gb KL4B.104G11F.051104T7 KL4B Nicotiana tabacum cDNA clone KL4B.104G11, mF           | 452.7   | 1 |
| tc Rep: Glutamyl-tRNA reductase 1, chloroplast precursor - Cucumis sativus (Cucur    | 144.16  | 1 |
| tc Rep: tetra-peptide repeat homeobox-like (TPRXL) on chromosome 3 - Homo sapi       | 47029.1 | 1 |
| Unknown                                                                              | 504.63  | 1 |
| tc Rep: Chromosome chr2 scaffold_140, whole genome shotgun sequence - Vitis vi       | 133.88  | 1 |
| tc Rep: Expressed protein - Arabidopsis thaliana (Mouse-ear cress), partial (48%) [T | 35.85   | 1 |
| gb KR3B.105P17F.051109T7 KR3B Nicotiana tabacum cDNA clone KR3B.105P17, mI           | 509.75  | 1 |
| Unknown                                                                              | 18.84   | 1 |
| gb KN6B.101G11F.051230T7 KN6B Nicotiana tabacum cDNA clone KN6B.101G11, n            | 108.37  | 1 |
| tc Rep: Chromosome chr11 scaffold_13, whole genome shotgun sequence - Vitis vi       | 178.21  | 1 |
| gb KT7C.108D21F.051219T7 KT7 Nicotiana tabacum cDNA clone KT7C.108D21, mRI           | 421.12  | 1 |
| Unknown                                                                              | 21.34   | 1 |
| tc Rep: Chromosome chr19 scaffold_66, whole genome shotgun sequence - Vitis vi       | 1052.57 | 1 |
| Unknown                                                                              | 63.83   | 1 |
| Unknown                                                                              | 27.64   | 1 |
| Unknown                                                                              | 24.67   | 1 |
| gb KR2B.107D18F.051229T7 KR2B Nicotiana tabacum cDNA clone KR2B.107D18, m            | 107.05  | 1 |
| gb BP129711 MAT001 Nicotiana tabacum cDNA clone BY1592, mRNA sequence [BF            | 331.67  | 1 |
| Unknown                                                                              | 379.49  | 1 |
| tc Rep: Chromosome chr13 scaffold_17, whole genome shotgun sequence - Vitis vi       | 300.88  | 1 |



|                                                                                      |          |   |
|--------------------------------------------------------------------------------------|----------|---|
| tc Rep: Chromosome chr8 scaffold_34, whole genome shotgun sequence - Vitis vin       | 234.29   | 1 |
| gb KT7C.104G04F.051219T7 KT7 Nicotiana tabacum cDNA clone KT7C.104G04, mR            | 133.24   | 1 |
| tc Rep: Polyprotein - Glycine max (Soybean), partial (5%) [TC55953]                  | 60.32    | 1 |
| tc Rep: Chromosome undetermined scaffold_87, whole genome shotgun sequence           | 22.57    | 1 |
| Unknown                                                                              | 1170.75  | 1 |
| tc Rep: Chromosome chr6 scaffold_25, whole genome shotgun sequence - Vitis vin       | 188.8    | 1 |
| gb CHO_SL028xc16f1.ab1 CHO_SL Nicotiana tabacum cDNA, mRNA sequence [EH6.            | 81.27    | 1 |
| gb AGN_RNC108xa04f1.ab1 AGN_RNC Nicotiana tabacum cDNA 5', mRNA sequenc              | 129.65   | 1 |
| gb TT-01_C07 Burley21 trichome library Nicotiana tabacum cDNA, mRNA sequence         | 271.34   | 1 |
| gb KF8C.104L11F.051214T7 KF8 Nicotiana tabacum cDNA clone KF8C.104L11, mRN           | 133.39   | 1 |
| tc Rep: Chromosome chr14 scaffold_21, whole genome shotgun sequence - Vitis vi       | 31.63    | 1 |
| gb CHO_SL014xo02f1.ab1 CHO_SL Nicotiana tabacum cDNA, mRNA sequence [EH6             | 134.88   | 1 |
| gb TT-38_P23 K326 early senescent leaf library Nicotiana tabacum cDNA, mRNA se       | 1124.61  | 1 |
| tc Rep: Cp protein - Celosia cristata, complete [TC69499]                            | 26.51    | 1 |
| gb AGN_RNC007xa08f1.ab1 AGN_RNC Nicotiana tabacum cDNA 5', mRNA sequenc              | 56.64    | 1 |
| Unknown                                                                              | 33.03    | 1 |
| gb Nicotiana tabacum Bax inhibitor 1 (BI-1) mRNA, complete cds [AF390556]            | 15529.75 | 1 |
| gb AM824341 seedling library, SL Nicotiana tabacum cDNA clone nt002316042, mF        | 3237.09  | 1 |
| tc Rep: Chromosome chr11 scaffold_13, whole genome shotgun sequence - Vitis vi       | 20.87    | 1 |
| gb AM806952 DL, diurnal library Nicotiana tabacum cDNA clone nt005191060, mRI        | 29.59    | 1 |
| gb CHO_SL015xl08f2.ab1 CHO_SL Nicotiana tabacum cDNA, mRNA sequence [EH6]            | 1004.12  | 1 |
| gb KG9B.002G09F.050720T7 KG9B Nicotiana tabacum cDNA clone KG9B.002G09, n            | 635.65   | 1 |
| Unknown                                                                              | 31.34    | 1 |
| tc Rep: Chromosome chr10 scaffold_179, whole genome shotgun sequence - Vitis v       | 186      | 1 |
| gb TT-10_O03 K326 late senescent leaf library Nicotiana tabacum cDNA, mRNA seq       | 475.41   | 1 |
| tc Rep: Cellulose synthase catalytic subunit - Nicotiana alata (Winged tobacco) (Per | 61.55    | 1 |
| tc Rep: Chromosome chr12 scaffold_47, whole genome shotgun sequence - Vitis vi       | 32.32    | 1 |
| tc Rep: PH-regulated protein 1 - Candida dubliniensis (Yeast), partial (3%) [TC48134 | 47.28    | 1 |
| gb KN6B.103B01F.060103T7 KN6B Nicotiana tabacum cDNA clone KN6B.103B01, n            | 114.84   | 1 |
| gb KR3B.112G03F.060119T7 KR3B Nicotiana tabacum cDNA clone KR3B.112G03, m            | 59.49    | 1 |
| Unknown                                                                              | 61.71    | 1 |
| gb KL4B.111O01F.060128T7 KL4B Nicotiana tabacum cDNA clone KL4B.111O01, mF           | 984.28   | 1 |
| tc Rep: Chorismate synthase 1, chloroplast precursor - Solanum lycopersicum (Tom     | 846.43   | 1 |
| Unknown                                                                              | 27       | 1 |

|                                                                                                               |          |   |
|---------------------------------------------------------------------------------------------------------------|----------|---|
| gb AGN_RPC005xm05f1.ab1 AGN_RPC Nicotiana tabacum cDNA 5', mRNA sequenc                                       | 33.92    | 1 |
| tc Rep: Chromosome chr14 scaffold_21, whole genome shotgun sequence - Vitis vi                                | 4176.64  | 1 |
| gb KF8B.200P07F.060120T7 KF8 Nicotiana tabacum cDNA clone KF8B.200P07, mRN                                    | 1590.67  | 1 |
| Unknown                                                                                                       | 95.1     | 1 |
| tc Rep: Polyubiquitin - Thlaspi caerulescens (Alpine penny-cress) (Thlaspi calamar                            | 9677.81  | 1 |
| tc Rep: Chromosome chr2 scaffold_105, whole genome shotgun sequence - Vitis vi                                | 9490.25  | 1 |
| tc Rep: Chromosome chr15 scaffold_40, whole genome shotgun sequence - Vitis vi                                | 34.12    | 1 |
| Unknown                                                                                                       | 197.47   | 1 |
| tc Rep: Chromosome chr8 scaffold_88, whole genome shotgun sequence - Vitis vin                                | 458.24   | 1 |
| tc Rep: Chromosome chr1 scaffold_46, whole genome shotgun sequence - Vitis vin                                | 178.65   | 1 |
| gb tbt_010277 Normalized Nicotiana tabacum cDNA library Nicotiana tabacum cDN                                 | 27.78    | 1 |
| gb Nicotiana tabacum ADP-glucose pyrophosphorylase small subunit (AGP) mRNA,                                  | 36.39    | 1 |
| gb KP1B.103L09F.050725T7 KP1B Nicotiana tabacum cDNA clone KP1B.103L09, mR                                    | 1102.53  | 1 |
| Unknown                                                                                                       | 713.42   | 1 |
| gb KR3B.102L11F.051107T7 KR3B Nicotiana tabacum cDNA clone KR3B.102L11, mF                                    | 111.26   | 1 |
| tc Rep: Chromosome chr19 scaffold_4, whole genome shotgun sequence - Vitis vin                                | 1433.71  | 1 |
| gb KF8C.101E06F.051214T7 KF8 Nicotiana tabacum cDNA clone KF8C.101E06, mRN                                    | 38248.15 | 1 |
| gb KF8C.102F16F.051214T7 KF8 Nicotiana tabacum cDNA clone KF8C.102F16, mRN                                    | 710.03   | 1 |
| gb KF8C.102C04F.051214T7 KF8 Nicotiana tabacum cDNA clone KF8C.102C04, mRN                                    | 512.66   | 1 |
| gb KP1B.101G01F.050722T7 KP1B Nicotiana tabacum cDNA clone KP1B.101G01, m                                     | 4544.43  | 1 |
| Unknown                                                                                                       | 530.55   | 1 |
| gb TT-41_F16 K326 early senescent leaf library Nicotiana tabacum cDNA, mRNA ser                               | 1675.97  | 1 |
| gb KG9B.104B13F.060120T7 KG9B Nicotiana tabacum cDNA clone KG9B.104B13, m                                     | 1548.4   | 1 |
| tc Rep: Chromosome chr13 scaffold_45, whole genome shotgun sequence - Vitis vi                                | 28.77    | 1 |
| gb TT-10_M22 Samsun trichome library Nicotiana tabacum cDNA, mRNA sequence                                    | 85.23    | 1 |
| Unknown                                                                                                       | 599.1    | 1 |
| gb AGN_RNC108xp19f1.ab1 AGN_RNC Nicotiana tabacum cDNA 5', mRNA sequenc                                       | 28.23    | 1 |
| tc Rep: Multisubunit Na <sup>+</sup> /H <sup>+</sup> antiporter, MnhF subunit - Rickettsia bellii (strain RMI | 120.9    | 1 |
| gb KR3B.102F03F.051107T7 KR3B Nicotiana tabacum cDNA clone KR3B.102F03, mF                                    | 44.77    | 1 |
| Unknown                                                                                                       | 55.41    | 1 |
| tc Rep: Chromosome chr4 scaffold_6, whole genome shotgun sequence - Vitis vinif                               | 200.41   | 1 |
| gb KR3B.111F02F.060119T7 KR3B Nicotiana tabacum cDNA clone KR3B.111F02, mF                                    | 18.5     | 1 |
| Unknown                                                                                                       | 78.61    | 1 |
| tc Rep: Chromosome chr4 scaffold_6, whole genome shotgun sequence - Vitis vinif                               | 18382.85 | 1 |

|                                                                                        |         |   |
|----------------------------------------------------------------------------------------|---------|---|
| tc Rep: Chromosome chr7 scaffold_20, whole genome shotgun sequence - Vitis vin         | 112.71  | 1 |
| tc Rep: Chromosome chr3 scaffold_8, whole genome shotgun sequence - Vitis vinif        | 79.67   | 1 |
| gb AGN_RNC007xm13f1.ab1 AGN_RNC Nicotiana tabacum cDNA 5', mRNA sequen                 | 85.11   | 1 |
| tc Rep: Chromosome undetermined scaffold_975, whole genome shotgun sequenc             | 22.1    | 1 |
| Unknown                                                                                | 7162.46 | 1 |
| Unknown                                                                                | 122.67  | 1 |
| gb KL5B.104M05F.060207T7 KL5B Nicotiana tabacum cDNA clone KL5B.104M05, m              | 54.2    | 1 |
| tc Rep: Protein transport protein SEC61 subunit gamma - Oryza sativa subsp. japon      | 2428.71 | 1 |
| gb CHO_SL008xp13f1.ab1 CHO_SL Nicotiana tabacum cDNA, mRNA sequence [EH6               | 696.47  | 1 |
| gb TT-03_G14 Burley21 trichome library Nicotiana tabacum cDNA, mRNA sequenc            | 247.85  | 1 |
| tc Rep: Class II ethylene responsive element binding factor-like protein - Nicotiana l | 826.3   | 1 |
| tc Rep: DNA-binding protein - Solanum lycopersicum (Tomato) (Lycopersicon escul        | 35.52   | 1 |
| Unknown                                                                                | 1382.99 | 1 |
| gb TL13.101D12F.060313T7 TL13 Nicotiana tabacum cDNA clone TL13.101D12, mR             | 515.44  | 1 |
| Unknown                                                                                | 5080.34 | 1 |
| Unknown                                                                                | 201.27  | 1 |
| gb KF8C.103O22F.051214T7 KF8 Nicotiana tabacum cDNA clone KF8C.103O22, mRl             | 23.72   | 1 |
| gb KR3B.106F03F.051109T7 KR3B Nicotiana tabacum cDNA clone KR3B.106F03, mF             | 1293.43 | 1 |
| Unknown                                                                                | 187.75  | 1 |
| gb TT-05_K06 K326 late senescent leaf library Nicotiana tabacum cDNA, mRNA seq         | 17.34   | 1 |
| tc Rep: GRP-like protein 2 - Gossypium hirsutum (Upland cotton) (Gossypium mexic       | 1432.65 | 1 |
| Unknown                                                                                | 818.54  | 1 |
| gb AGN_PNL223df1_d6.trimmed.seq AGN_PNL Nicotiana tabacum cDNA 5', mRNA                | 648.7   | 1 |
| gb FS416181 normalized full-length tobacco cDNA library Nicotiana tabacum cDNA         | 64.96   | 1 |
| gb KR2B.001F05F.050815T7 KR2B Nicotiana tabacum cDNA clone KR2B.001F05, mF             | 189.92  | 1 |
| gb AGN_RNC008xp03f1.ab1 AGN_RNC Nicotiana tabacum cDNA 5', mRNA sequenc                | 1302.15 | 1 |
| Unknown                                                                                | 24.79   | 1 |
| Unknown                                                                                | 463.37  | 1 |
| tc Rep: Chromosome chr16 scaffold_10, whole genome shotgun sequence - Vitis vi         | 505.82  | 1 |
| tc Rep: Calmodulin cam-210 - Daucus carota (Carrot), complete [TC42995]                | 4445.4  | 1 |
| tc Rep: Pre-mRNA splicing factor-like protein - Solanum tuberosum (Potato), partia     | 321.08  | 1 |
| gb KR3B.110K20F.051111T7 KR3B Nicotiana tabacum cDNA clone KR3B.110K20, mI             | 153.34  | 1 |
| gb KG9B.105D18F.051128T7 KG9B Nicotiana tabacum cDNA clone KG9B.105D18, n              | 80.96   | 1 |
| gb AGN_RNC018xc01f1.ab1 AGN_RNC Nicotiana tabacum cDNA 5', mRNA sequenc                | 74.46   | 1 |

|                                                                                        |          |   |
|----------------------------------------------------------------------------------------|----------|---|
| Unknown                                                                                | 429.08   | 1 |
| gb BL12.103A13F.060309T7 BL12 Nicotiana tabacum cDNA clone BL12.103A13, mR             | 129.84   | 1 |
| gb KL4B.100K05F.050922T7 KL4B Nicotiana tabacum cDNA clone KL4B.100K05, mR             | 30.2     | 1 |
| Unknown                                                                                | 22.95    | 1 |
| tc Rep: ARF_AJECA ADP-RIBOSYLATION FACTOR - Emericella nidulans (Aspergillus n         | 26.96    | 1 |
| tc Rep: Chromosome chr3 scaffold_8, whole genome shotgun sequence - Vitis vinif        | 185.95   | 1 |
| gb AGN_RNC211xf07f1.ab1 AGN_RNC Nicotiana tabacum cDNA 5', mRNA sequenc                | 8633.3   | 1 |
| gb KF8C.101J06F.051214T7 KF8 Nicotiana tabacum cDNA clone KF8C.101J06, mRN             | 975.16   | 1 |
| Unknown                                                                                | 102.73   | 1 |
| tc Rep: Chromosome chr12 scaffold_103, whole genome shotgun sequence - Vitis v         | 786.08   | 1 |
| tc Rep: S-adenosylmethionine decarboxylase proenzyme (AdoMetDC) (SamDC) [Cc            | 2981.58  | 1 |
| tc Rep: AT5g44790/K23L20_14 - Arabidopsis thaliana (Mouse-ear cress), partial (18      | 56.22    | 1 |
| gb ntsm26 embryogenic microspores Nicotiana tabacum cDNA, mRNA sequence [E             | 454.79   | 1 |
| gb CHO_SL027xo13f1.ab1 CHO_SL Nicotiana tabacum cDNA, mRNA sequence [EH6               | 24.34    | 1 |
| gb AGN_RNC023xc06f1.ab1 AGN_RNC Nicotiana tabacum cDNA 5', mRNA sequenc                | 476.08   | 1 |
| tc Rep: Calcineurin B-like protein 2 - Arabidopsis thaliana (Mouse-ear cress), partial | 502.64   | 1 |
| Unknown                                                                                | 18.57    | 1 |
| tc Rep: Chromosome chr3 scaffold_8, whole genome shotgun sequence - Vitis vinif        | 63.94    | 1 |
| Unknown                                                                                | 138.46   | 1 |
| tc Rep: Chromosome chr1 scaffold_75, whole genome shotgun sequence - Vitis vin         | 23       | 1 |
| Unknown                                                                                | 1401.55  | 1 |
| Unknown                                                                                | 58624.35 | 1 |
| Unknown                                                                                | 47.97    | 1 |
| tc Rep: Transcription factor - Nicotiana tabacum (Common tobacco), partial (33%)       | 147.31   | 1 |
| tc Rep: Chromosome chr6 scaffold_3, whole genome shotgun sequence - Vitis vinif        | 257.46   | 1 |
| gb KN6B.101I22F.051230T7 KN6B Nicotiana tabacum cDNA clone KN6B.101I22, mF             | 923.78   | 1 |
| gb TT-47_I07 Burley21 trichome library Nicotiana tabacum cDNA, mRNA sequence           | 27.85    | 1 |
| gb FS421124 normalized full-length tobacco cDNA library Nicotiana tabacum cDNA         | 635.81   | 1 |
| Unknown                                                                                | 93.94    | 1 |
| tc Rep: Succinyl-CoA ligase alpha 2 subunit - Solanum lycopersicum (Tomato) (Lyco      | 504.97   | 1 |
| tc Rep: Chromosome chr1 scaffold_135, whole genome shotgun sequence - Vitis vi         | 10392.3  | 1 |
| tc Rep: MybSt1 - Solanum tuberosum (Potato), partial (96%) [TC51706]                   | 415.67   | 1 |
| gb KP1B.105L07F.060116T7 KP1B Nicotiana tabacum cDNA clone KP1B.105L07, mF             | 465.31   | 1 |
| Unknown                                                                                | 91.45    | 1 |

|                                                                                  |          |   |
|----------------------------------------------------------------------------------|----------|---|
| gb AGN_ELP022xi18f1.ab1 AGN_ELP Nicotiana tabacum cDNA 5', mRNA sequence         | 119.01   | 1 |
| Unknown                                                                          | 140.9    | 1 |
| Unknown                                                                          | 210.75   | 1 |
| tc Rep: Cp protein - Celosia cristata, complete [TC45097]                        | 47.9     | 1 |
| gb TT-13_P17 Samsun trichome library Nicotiana tabacum cDNA, mRNA sequence       | 49394.65 | 1 |
| gb KT7C.109B04F.051221T7 KT7 Nicotiana tabacum cDNA clone KT7C.109B04, mR        | 94.77    | 1 |
| gb KP1B.001I21F.050628T7 KP1B Nicotiana tabacum cDNA clone KP1B.001I21, mR       | 29.23    | 1 |
| gb AGN_RPC014xn11f1.ab1 AGN_RPC Nicotiana tabacum cDNA 5', mRNA sequence         | 108.41   | 1 |
| Unknown                                                                          | 37102.7  | 1 |
| Unknown                                                                          | 9473.72  | 1 |
| gb AGN_RNC023xp10f1.ab1 AGN_RNC Nicotiana tabacum cDNA 5', mRNA sequenc          | 63.79    | 1 |
| tc Rep: Chromosome chr18 scaffold_137, whole genome shotgun sequence - Vitis v   | 57.54    | 1 |
| Unknown                                                                          | 126.86   | 1 |
| tc Rep: Heat shock protein 90 - Nicotiana tabacum (Common tobacco), partial (29% | 270.7    | 1 |
| Unknown                                                                          | 34.3     | 1 |
| gb KG9B.001J02F.050628T7 KG9B Nicotiana tabacum cDNA clone KG9B.001J02, mF       | 26.98    | 1 |
| tc Rep: Gamma hydroxybutyrate dehydrogenase - Arabidopsis thaliana (Mouse-ear    | 218.72   | 1 |
| gb KF8C.101J01F.051214T7 KF8 Nicotiana tabacum cDNA clone KF8C.101J01, mRN       | 957.4    | 1 |
| gb KL4B.107P08F.051126T7 KL4B Nicotiana tabacum cDNA clone KL4B.107P08, mR       | 51.05    | 1 |
| tc Rep: Chromosome chr3 scaffold_8, whole genome shotgun sequence - Vitis vinif  | 104.16   | 1 |
| gb KG9B.005E09F.050721T7 KG9B Nicotiana tabacum cDNA clone KG9B.005E09, m        | 390.63   | 1 |
| gb KF8C.103B23F.051214T7 KF8 Nicotiana tabacum cDNA clone KF8C.103B23, mRN       | 375.43   | 1 |
| gb AM848538 DL, diurnal library Nicotiana tabacum cDNA clone nt005047013, mR     | 151.12   | 1 |
| Unknown                                                                          | 27.07    | 1 |
| tc Rep: Chromosome chr9 scaffold_7, whole genome shotgun sequence - Vitis vinif  | 61.78    | 1 |
| gb KP1B.107H01F.050726T7 KP1B Nicotiana tabacum cDNA clone KP1B.107H01, m        | 117.93   | 1 |
| gb CHO_SL008xf07f1.ab1 CHO_SL Nicotiana tabacum cDNA, mRNA sequence [EH62        | 787.62   | 1 |
| gb KL4B.107A04F.051126T7 KL4B Nicotiana tabacum cDNA clone KL4B.107A04, mF       | 711.46   | 1 |
| Unknown                                                                          | 23.3     | 1 |
| gb N.tabacum mRNA for delta proteasome subunit [Y09505]                          | 103.03   | 1 |
| gb KF8C.103O13F.051214T7 KF8 Nicotiana tabacum cDNA clone KF8C.103O13, mR        | 20223.9  | 1 |
| gb KG9B.106J08F.051129T7 KG9B Nicotiana tabacum cDNA clone KG9B.106J08, mF       | 151.62   | 1 |
| gb AGN_ELP017xo20f1.ab1 AGN_ELP Nicotiana tabacum cDNA 5', mRNA sequence         | 19.25    | 1 |
| gb KT7B.107I23F.060124T7 KT7 Nicotiana tabacum cDNA clone KT7B.107I23, mRN       | 88.28    | 1 |

|                                                                                       |         |   |
|---------------------------------------------------------------------------------------|---------|---|
| gb Tabacco Cab40 mRNA for major chlorophyll a [X52744]                                | 26.99   | 1 |
| tc Rep: Histone H4 [Contains: Osteogenic growth peptide (OGP)]. - Rattus norvegicus   | 1522.46 | 1 |
| gb KG9B.101P01F.060120T7 KG9B Nicotiana tabacum cDNA clone KG9B.101P01, m             | 489.23  | 1 |
| gb KP1B.103O07F.050725T7 KP1B Nicotiana tabacum cDNA clone KP1B.103O07, m             | 141.24  | 1 |
| tc Rep: Chromosome undetermined scaffold_80, whole genome shotgun sequence            | 32.22   | 1 |
| Unknown                                                                               | 23.01   | 1 |
| gb KG9B.001D20F.050628T7 KG9B Nicotiana tabacum cDNA clone KG9B.001D20, n             | 1442.74 | 1 |
| tc Rep: Ubiquitin carrier protein - Capsicum annuum (Bell pepper), complete [TC47     | 275.89  | 1 |
| gb KG9B.105D04F.051128T7 KG9B Nicotiana tabacum cDNA clone KG9B.105D04, n             | 1008.54 | 1 |
| gb KN6B.106O06F.060104T7 KN6B Nicotiana tabacum cDNA clone KN6B.106O06, r             | 8017.56 | 1 |
| tc Rep: Chromosome chr9 scaffold_33, whole genome shotgun sequence - Vitis vin        | 3334.78 | 1 |
| Unknown                                                                               | 2594.11 | 1 |
| gb KG9B.103N06F.051128T7 KG9B Nicotiana tabacum cDNA clone KG9B.103N06, n             | 68.61   | 1 |
| gb Nicotiana tabacum NtMFP mRNA for multifunctional protein, complete cds [AB         | 528.34  | 1 |
| Unknown                                                                               | 18.46   | 1 |
| Unknown                                                                               | 21.27   | 1 |
| tc Rep: Chromosome chr3 scaffold_8, whole genome shotgun sequence - Vitis vinif       | 35.69   | 1 |
| gb KF8C.103C05F.051214T7 KF8 Nicotiana tabacum cDNA clone KF8C.103C05, mRN            | 32.71   | 1 |
| gb N.tabacum mRNA for protein disulfide-isomerase precursor [Y11209]                  | 3944.4  | 1 |
| gb KF8C.106M22F.051215T7 KF8 Nicotiana tabacum cDNA clone KF8C.106M22, mF             | 71.72   | 1 |
| Unknown                                                                               | 230.53  | 1 |
| gb AM822174 DL, diurnal library Nicotiana tabacum cDNA clone nt005006055, mRI         | 56.9    | 1 |
| gb KP1B.108L23F.050726T7 KP1B Nicotiana tabacum cDNA clone KP1B.108L23, mR            | 23.54   | 1 |
| gb KT7C.101I10F.051216T7 KT7 Nicotiana tabacum cDNA clone KT7C.101I10, mRN            | 221.99  | 1 |
| gb KP1B.104H11F.050725T7 KP1B Nicotiana tabacum cDNA clone KP1B.104H11, m             | 65.53   | 1 |
| tc Rep: 60S ribosomal protein L6 - Mesembryanthemum crystallinum (Common ice          | 269.41  | 1 |
| Unknown                                                                               | 150.83  | 1 |
| gb TOBESTR047H11 TOBEST cDNA library 1 Nicotiana tabacum cDNA 5', mRNA seq            | 19162.2 | 1 |
| tc Rep: Light harvesting chlorophyll a/b-binding protein precursor - Nicotiana sylve: | 57.01   | 1 |
| gb KG9B.001E04F.050628T7 KG9B Nicotiana tabacum cDNA clone KG9B.001E04, m             | 1894.32 | 1 |
| Unknown                                                                               | 71.58   | 1 |
| Unknown                                                                               | 247.29  | 1 |
| Unknown                                                                               | 4405.64 | 1 |
| Unknown                                                                               | 413.85  | 1 |

|                                                                                    |          |   |
|------------------------------------------------------------------------------------|----------|---|
| gb KR3B.102D10F.051107T7 KR3B Nicotiana tabacum cDNA clone KR3B.102D10, m          | 404.61   | 1 |
| gb KR2B.001F05F.050815T7 KR2B Nicotiana tabacum cDNA clone KR2B.001F05, m          | 219.17   | 1 |
| Unknown                                                                            | 56.4     | 1 |
| gb KT7C.102C14F.051216T7 KT7 Nicotiana tabacum cDNA clone KT7C.102C14, mR          | 26.07    | 1 |
| tc Rep: Chromosome chr6 scaffold_25, whole genome shotgun sequence - Vitis vin     | 32.26    | 1 |
| gb KN6B.113A16F.060127T7 KN6B Nicotiana tabacum cDNA clone KN6B.113A16, n          | 481.04   | 1 |
| Unknown                                                                            | 115.27   | 1 |
| gb BP129638 MAT001 Nicotiana tabacum cDNA clone BY1514, mRNA sequence [BF          | 78.8     | 1 |
| gb KP1B.104B06F.050725T7 KP1B Nicotiana tabacum cDNA clone KP1B.104B06, ml         | 35.83    | 1 |
| tc Rep: Chromosome chr11 scaffold_56, whole genome shotgun sequence - Vitis vi     | 30.87    | 1 |
| tc Rep: Class II small heat shock protein Le-HSP17.6 - Solanum lycopersicum (Toma  | 64.91    | 1 |
| tc Rep: Ribosomal protein S8 - Vitis vinifera (Grape), partial (25%) [TC71744]     | 93.5     | 1 |
| Unknown                                                                            | 40.74    | 1 |
| gb KG9B.001G19F.050628T7 KG9B Nicotiana tabacum cDNA clone KG9B.001G19, n          | 66.01    | 1 |
| gb KL4B.110O19F.051106T7 KL4B Nicotiana tabacum cDNA clone KL4B.110O19, m          | 48.79    | 1 |
| gb AGN_PNL212ar1_c9.trimmed.seq AGN_PNL Nicotiana tabacum cDNA 3', mRNA            | 36.46    | 1 |
| Unknown                                                                            | 19.19    | 1 |
| gb N.tabacum mRNA for c subunit of V-type ATPase (980 bp) [X95752]                 | 2987.9   | 1 |
| Unknown                                                                            | 88.71    | 1 |
| gb KL4B.103C18F.051103T7 KL4B Nicotiana tabacum cDNA clone KL4B.103C18, mR         | 184.89   | 1 |
| gb KG9B.004I10F.050721T7 KG9B Nicotiana tabacum cDNA clone KG9B.004I10, mR         | 142.13   | 1 |
| tc Rep: Chromosome chr14 scaffold_128, whole genome shotgun sequence - Vitis v     | 26.41    | 1 |
| Unknown                                                                            | 653.96   | 1 |
| gb KP1B.109C10F.050727T7 KP1B Nicotiana tabacum cDNA clone KP1B.109C10, ml         | 92.23    | 1 |
| tc Rep: Chromosome chr11 scaffold_13, whole genome shotgun sequence - Vitis vi     | 2542.39  | 1 |
| gb AGN_RPC025xn11f1.ab1 AGN_RPC Nicotiana tabacum cDNA 5', mRNA sequenc            | 152.49   | 1 |
| gb KF8C.103N19F.051214T7 KF8 Nicotiana tabacum cDNA clone KF8C.103N19, mR          | 56365.15 | 1 |
| tc Rep: Chromosome chr5 scaffold_2, whole genome shotgun sequence - Vitis vinif    | 303.84   | 1 |
| tc Rep: Chromosome chr5 scaffold_2, whole genome shotgun sequence - Vitis vinif    | 993.73   | 1 |
| Unknown                                                                            | 1564.76  | 1 |
| tc Rep: Chromosome undetermined scaffold_142, whole genome shotgun sequenc         | 39.18    | 1 |
| gb KL5B.103C20F.060207T7 KL5B Nicotiana tabacum cDNA clone KL5B.103C20, mR         | 21.17    | 1 |
| tc Rep: Histidinol dehydrogenase - Vitis vinifera (Grape), partial (54%) [TC43398] | 139.29   | 1 |
| gb Nicotiana tabacum adenosine kinase isoform 2S mRNA, complete cds [AY69505       | 18212.3  | 1 |

|                                                                                    |          |   |
|------------------------------------------------------------------------------------|----------|---|
| gb KR3B.109A07F.051111T7 KR3B Nicotiana tabacum cDNA clone KR3B.109A07, m          | 1648.72  | 1 |
| Unknown                                                                            | 160.03   | 1 |
| gb AGN_RNC021xl08f1.ab1 AGN_RNC Nicotiana tabacum cDNA 5', mRNA sequenc            | 1633.89  | 1 |
| gb TT-49_L17 K326 late senescent leaf library Nicotiana tabacum cDNA, mRNA seqi    | 730.64   | 1 |
| gb KG9B.003L23F.050720T7 KG9B Nicotiana tabacum cDNA clone KG9B.003L23, m          | 249.58   | 1 |
| gb KP1B.101N01F.050722T7 KP1B Nicotiana tabacum cDNA clone KP1B.101N01, m          | 153.28   | 1 |
| tc Rep: Uncharacterized protein At1g77540 - Arabidopsis thaliana (Mouse-ear cres   | 112.02   | 1 |
| tc Rep: S-adenosylmethionine synthetase - Nicotiana suaveolens, complete [TC435    | 15213.15 | 1 |
| gb Nicotiana tabacum NtHSF2 mRNA for heat shock factor, complete cds [AB01448      | 402.99   | 1 |
| gb KP1B.107C03F.050726T7 KP1B Nicotiana tabacum cDNA clone KP1B.107C03, ml         | 248.55   | 1 |
| gb KP1B.113B24F.060117T7 KP1B Nicotiana tabacum cDNA clone KP1B.113B24, ml         | 128.44   | 1 |
| gb KF8C.108E12F.051215T7 KF8 Nicotiana tabacum cDNA clone KF8C.108E12, mRN         | 23.83    | 1 |
| Unknown                                                                            | 558.45   | 1 |
| gb BP129154 MAT001 Nicotiana tabacum cDNA clone BY986, mRNA sequence [BP:          | 472.53   | 1 |
| tc Rep: 3'-5'-exoribonuclease/RNA binding-like protein - Solanum tuberosum (Pota   | 82.22    | 1 |
| tc Rep: Actin - Phalaenopsis hybrid cultivar, partial (39%) [TC69811]              | 19236.85 | 1 |
| gb TT-21_I16 K326 trichome library Nicotiana tabacum cDNA, mRNA sequence [FGI      | 26.07    | 1 |
| Unknown                                                                            | 61.19    | 1 |
| tc Rep: Calcium-dependent protein kinase CPK1 adapter protein 2-like - Oryza sativ | 259      | 1 |
| gb KN6B.102E19F.051230T7 KN6B Nicotiana tabacum cDNA clone KN6B.102E19, m          | 1031.88  | 1 |
| tc Rep: Chromosome chr16 scaffold_86, whole genome shotgun sequence - Vitis vi     | 59.66    | 1 |
| gb Nicotiana tabacum NtMKP1 mRNA for MAP kinase phosphatase, complete cds [        | 1992.54  | 1 |
| tc Rep: Chromosome undetermined scaffold_838, whole genome shotgun sequenc         | 241.6    | 1 |
| tc Rep: Plastidic ATP/ADP-transporter - Solanum tuberosum (Potato), partial (20%)  | 543.58   | 1 |
| gb Nicotiana tabacum ACS4 mRNA, partial cds [EU123523]                             | 46.74    | 1 |
| Unknown                                                                            | 25.18    | 1 |
| gb Nicotiana tabacum cDNA-AFLP-fragment BSTC4-12-390, cultivar Bright Yellow 2     | 37.39    | 1 |
| gb KP1B.101H09F.050722T7 KP1B Nicotiana tabacum cDNA clone KP1B.101H09, m          | 56.83    | 1 |
| tc Rep: Chromosome chr2 scaffold_132, whole genome shotgun sequence - Vitis vi     | 94.84    | 1 |
| tc Rep: ETAG-A3 - Solanum lycopersicum (Tomato) (Lycopersicon esculentum), pari    | 43.78    | 1 |
| gb CHO_SL010xk15f1.ab1 CHO_SL Nicotiana tabacum cDNA, mRNA sequence [EH6           | 9800.72  | 1 |
| gb KF8C.101K12F.051214T7 KF8 Nicotiana tabacum cDNA clone KF8C.101K12, mRN         | 15771.5  | 1 |
| tc Rep: Mitochondrial phosphate transporter - Glycine max (Soybean), partial (44%  | 1407.04  | 1 |
| gb CHO_SL026xc11f1.ab1 CHO_SL Nicotiana tabacum cDNA, mRNA sequence [EH6           | 533.97   | 1 |



|                                                                                       |         |   |
|---------------------------------------------------------------------------------------|---------|---|
| gb KF8C.104J14F.051214T7 KF8 Nicotiana tabacum cDNA clone KF8C.104J14, mRNA           | 415.75  | 1 |
| Unknown                                                                               | 8936.17 | 1 |
| gb TT-33_C07 tobacco leaf library Nicotiana tabacum cDNA, mRNA sequence [FG63         | 40.78   | 1 |
| gb CHO_SL008xb09f1.ab1 CHO_SL Nicotiana tabacum cDNA, mRNA sequence [EH6              | 161.44  | 1 |
| Unknown                                                                               | 29.57   | 1 |
| gb AGN_RNC020xd19f1.ab1 AGN_RNC Nicotiana tabacum cDNA 5', mRNA sequenc               | 64.92   | 1 |
| tc Rep: Chromosome chr9 scaffold_33, whole genome shotgun sequence - Vitis vin        | 9857.42 | 1 |
| Unknown                                                                               | 29.97   | 1 |
| tc Rep: Chromosome undetermined scaffold_644, whole genome shotgun sequenc            | 1023.57 | 1 |
| gb KN6B.109N22F.060106T7 KN6B Nicotiana tabacum cDNA clone KN6B.109N22, r             | 26.85   | 1 |
| gb FS429988 normalized full-length tobacco cDNA library Nicotiana tabacum cDNA        | 2848.11 | 1 |
| gb Nicotiana tabacum cytosolic acetoacetyl-coenzyme A thiolase (AACT1) mRNA, c        | 1533.76 | 1 |
| gb KN6B.105M19F.060104T7 KN6B Nicotiana tabacum cDNA clone KN6B.105M19,               | 773.99  | 1 |
| gb KL4B.101O19F.051103T7 KL4B Nicotiana tabacum cDNA clone KL4B.101O19, m             | 826.36  | 1 |
| gb Nicotiana tabacum internal-motor kinesin mRNA, partial cds [DQ156499]              | 564.97  | 1 |
| gb KR2B.111N18F.060128T7 KR2B Nicotiana tabacum cDNA clone KR2B.111N18, m             | 94.99   | 1 |
| gb TT-11_G14 Samsun trichome library Nicotiana tabacum cDNA, mRNA sequence            | 63.3    | 1 |
| tc Rep: Chromosome chr15 scaffold_37, whole genome shotgun sequence - Vitis vi        | 75.79   | 1 |
| gb KF8C.104F18F.051214T7 KF8 Nicotiana tabacum cDNA clone KF8C.104F18, mRN            | 3458.81 | 1 |
| tc Rep: Chromosome chr7 scaffold_31, whole genome shotgun sequence - Vitis vin        | 86.59   | 1 |
| gb FS407121 normalized full-length tobacco cDNA library Nicotiana tabacum cDNA        | 2607.96 | 1 |
| Unknown                                                                               | 61.58   | 1 |
| Unknown                                                                               | 67.17   | 1 |
| Unknown                                                                               | 375.82  | 1 |
| Unknown                                                                               | 187.81  | 1 |
| tc Rep: Probable signal peptidase complex subunit 1 - Arabidopsis thaliana (Mouse-    | 3133.03 | 1 |
| Unknown                                                                               | 24.16   | 1 |
| Unknown                                                                               | 168.08  | 1 |
| Unknown                                                                               | 25.01   | 1 |
| tc Rep: Delta-12 fatty acid desaturase - Borago officinalis (Bourrache) (Borage), con | 71594.8 | 1 |
| Unknown                                                                               | 79.37   | 1 |
| tc Rep: Chromosome chr18 scaffold_1, whole genome shotgun sequence - Vitis vin        | 945.2   | 1 |
| Unknown                                                                               | 694.58  | 1 |
| gb FS389605 normalized full-length tobacco cDNA library Nicotiana tabacum cDNA        | 36.62   | 1 |

|                                                                                               |          |   |
|-----------------------------------------------------------------------------------------------|----------|---|
| Unknown                                                                                       | 189.4    | 1 |
| gb KP1B.102L07F.050722T7 KP1B Nicotiana tabacum cDNA clone KP1B.102L07, mRNA sequence [EHL6]  | 552.61   | 1 |
| tc Rep: Chromosome chr18 scaffold_1, whole genome shotgun sequence - Vitis vinifera           | 491.6    | 1 |
| Unknown                                                                                       | 199.15   | 1 |
| Unknown                                                                                       | 954.76   | 1 |
| gb KT7C.104B18F.051219T7 KT7 Nicotiana tabacum cDNA clone KT7C.104B18, mRNA sequence [EHL6]   | 30.81    | 1 |
| tc Rep: Chromosome chr17 scaffold_12, whole genome shotgun sequence - Vitis vinifera          | 31.48    | 1 |
| gb EST_CSP008xl12f1.ab1 EST_CSP Nicotiana tabacum cDNA, mRNA sequence [EHL6]                  | 632.36   | 1 |
| Unknown                                                                                       | 1082.3   | 1 |
| Unknown                                                                                       | 32.42    | 1 |
| gb TT-32_N03 K326 trichome library Nicotiana tabacum cDNA, mRNA sequence [FC]                 | 101.34   | 1 |
| gb KF8C.104P10F.051214T7 KF8 Nicotiana tabacum cDNA clone KF8C.104P10, mRNA sequence [EHL6]   | 560.2    | 1 |
| tc Rep: Chromosome chr13 scaffold_17, whole genome shotgun sequence - Vitis vinifera          | 643.26   | 1 |
| tc Rep: Chromosome chr18 scaffold_1, whole genome shotgun sequence - Vitis vinifera           | 914.88   | 1 |
| tc Rep: Chromosome chr8 scaffold_23, whole genome shotgun sequence - Vitis vinifera           | 153.14   | 1 |
| gb AGN_PNL207dr1_h7.trimmed.seq AGN_PNL Nicotiana tabacum cDNA 3', mRNA sequence [EHL6]       | 32.72    | 1 |
| gb CHO_SL024xo11f1.ab1 CHO_SL Nicotiana tabacum cDNA, mRNA sequence [EHL6]                    | 2066.93  | 1 |
| tc Rep: Chromosome chr19 scaffold_4, whole genome shotgun sequence - Vitis vinifera           | 1563     | 1 |
| gb KG9B.004P01F.050721T7 KG9B Nicotiana tabacum cDNA clone KG9B.004P01, mRNA sequence [EHL6]  | 923.83   | 1 |
| tc Rep: Dihydrolipoyl dehydrogenase - Solanum lycopersicum (Tomato) (Lycopersicon esculentum) | 2798.52  | 1 |
| gb AGN_ELP022xh17f1.ab1 AGN_ELP Nicotiana tabacum cDNA 5', mRNA sequence [EHL6]               | 167.84   | 1 |
| gb KF8B.200N06F.060120T7 KF8 Nicotiana tabacum cDNA clone KF8B.200N06, mRNA sequence [EHL6]   | 1170.66  | 1 |
| Unknown                                                                                       | 163.61   | 1 |
| gb KT7C.106I01F.051219T7 KT7 Nicotiana tabacum cDNA clone KT7C.106I01, mRNA sequence [EHL6]   | 20.72    | 1 |
| tc Rep: Thioredoxin - Limonium bicolor, partial (64%) [TC42824]                               | 30.77    | 1 |
| gb TT-47_E16 Burley21 trichome library Nicotiana tabacum cDNA, mRNA sequence [EHL6]           | 202.28   | 1 |
| gb AGN_RPC014xb03f1.ab1 AGN_RPC Nicotiana tabacum cDNA 5', mRNA sequence [EHL6]               | 108.79   | 1 |
| Unknown                                                                                       | 212.6    | 1 |
| Unknown                                                                                       | 526.42   | 1 |
| tc Rep: Probable phospholipid hydroperoxide glutathione peroxidase - Nicotiana sylvestris     | 4095.56  | 1 |
| Unknown                                                                                       | 382.11   | 1 |
| Unknown                                                                                       | 27.25    | 1 |
| Unknown                                                                                       | 2887.62  | 1 |
| tc Rep: Chromosome chr1 scaffold_75, whole genome shotgun sequence - Vitis vinifera           | 21650.75 | 1 |

|                                                                                       |         |   |
|---------------------------------------------------------------------------------------|---------|---|
| tc Rep: Chromosome chr12 scaffold_47, whole genome shotgun sequence - Vitis vi        | 31.03   | 1 |
| tc Rep: ORMDL family protein-like - Oryza sativa subsp. japonica (Rice), partial (97% | 69.52   | 1 |
| tc Rep: Thioredoxin h-like protein - Nicotiana tabacum (Common tobacco), comple       | 623.67  | 1 |
| tc Rep: 14-3-3-like protein C - Nicotiana tabacum (Common tobacco), complete [TC      | 20127.4 | 1 |
| Unknown                                                                               | 382.98  | 1 |
| gb FS393322 normalized full-length tobacco cDNA library Nicotiana tabacum cDNA        | 842.41  | 1 |
| tc Rep: Arginase 2 - Solanum lycopersicum (Tomato) (Lycopersicon esculentum), cc      | 124.24  | 1 |
| tc Rep: Chromosome chr1 scaffold_5, whole genome shotgun sequence - Vitis vinif       | 98.14   | 1 |
| tc Rep: Chromosome chr4 scaffold_205, whole genome shotgun sequence - Vitis vi        | 28.62   | 1 |
| tc Rep: Chromosome chr17 scaffold_12, whole genome shotgun sequence - Vitis vi        | 138.39  | 1 |
| tc Rep: Chromosome chr4 scaffold_6, whole genome shotgun sequence - Vitis vinif       | 81.78   | 1 |
| tc Rep: Chromosome chr14 scaffold_27, whole genome shotgun sequence - Vitis vi        | 80.47   | 1 |
| tc Rep: Chromosome chr6 scaffold_3, whole genome shotgun sequence - Vitis vinif       | 142.43  | 1 |
| gb KF8C.101G03F.051214T7 KF8 Nicotiana tabacum cDNA clone KF8C.101G03, mRI            | 661.21  | 1 |
| tc Rep: Chromosome chr10 scaffold_43, whole genome shotgun sequence - Vitis vi        | 30.46   | 1 |
| Unknown                                                                               | 452.23  | 1 |
| tc Rep: Chromosome chr5 scaffold_2, whole genome shotgun sequence - Vitis vinif       | 217.56  | 1 |
| gb TT-07_L06 K326 late senescent leaf library Nicotiana tabacum cDNA, mRNA seqi       | 23.04   | 1 |
| tc Rep: Chromosome chr1 scaffold_5, whole genome shotgun sequence - Vitis vinif       | 124.47  | 1 |
| tc Rep: Ubiquitin-conjugating enzyme E2-17 kDa - Solanum lycopersicum (Tomato)        | 4312.65 | 1 |
| tc Rep: Chromosome chr8 scaffold_34, whole genome shotgun sequence - Vitis vin        | 107.09  | 1 |
| gb AM848505 seedling library, SL Nicotiana tabacum cDNA clone nt002165079, mR         | 87.26   | 1 |
| Unknown                                                                               | 11095.2 | 1 |
| gb AGN_ELP008xd10f1.ab1 AGN_ELP Nicotiana tabacum cDNA 5', mRNA sequence              | 506.76  | 1 |
| tc Rep: Chromosome chr14 scaffold_9, whole genome shotgun sequence - Vitis vin        | 512.12  | 1 |
| Unknown                                                                               | 1185.07 | 1 |
| gb AGN_ELP023xe14f1.ab1 AGN_ELP Nicotiana tabacum cDNA 5', mRNA sequence              | 58.82   | 1 |
| gb KG9B.106K09F.051129T7 KG9B Nicotiana tabacum cDNA clone KG9B.106K09, m             | 857.53  | 1 |
| gb KL5B.114N09F.060217T7 KL5B Nicotiana tabacum cDNA clone KL5B.114N09, mR            | 215.59  | 1 |
| Unknown                                                                               | 137.82  | 1 |
| gb AGN_RPC004xc02f1.ab1 AGN_RPC Nicotiana tabacum cDNA 5', mRNA sequence              | 28.23   | 1 |
| Unknown                                                                               | 117.9   | 1 |
| tc Rep: Expressed protein - Arabidopsis thaliana (Mouse-ear cress), partial (59%) [T  | 50.85   | 1 |
| tc Rep: Chromosome chr11 scaffold_13, whole genome shotgun sequence - Vitis vi        | 264.75  | 1 |

|                                                                                         |          |   |
|-----------------------------------------------------------------------------------------|----------|---|
| Unknown                                                                                 | 25.81    | 1 |
| gb KL4B.105B13F.051104T7 KL4B Nicotiana tabacum cDNA clone KL4B.105B13, mR              | 26.99    | 1 |
| gb KP1B.104N22F.050725T7 KP1B Nicotiana tabacum cDNA clone KP1B.104N22, m               | 564.3    | 1 |
| Unknown                                                                                 | 77.11    | 1 |
| tc Rep: Chromosome chr3 scaffold_8, whole genome shotgun sequence - Vitis vinif         | 60.17    | 1 |
| gb KF8B.200H02F.060120T7 KF8 Nicotiana tabacum cDNA clone KF8B.200H02, mRI              | 24418.2  | 1 |
| Unknown                                                                                 | 26.26    | 1 |
| tc Rep: Calcium-dependent protein kinase 1 - Datura metel (Devil's trumpet) (Datur      | 17.81    | 1 |
| Unknown                                                                                 | 26.53    | 1 |
| Unknown                                                                                 | 37.95    | 1 |
| tc Rep: Actin-7 - Arabidopsis thaliana (Mouse-ear cress), complete [TC40665]            | 50.63    | 1 |
| Unknown                                                                                 | 96.64    | 1 |
| Unknown                                                                                 | 184.32   | 1 |
| tc Rep: Ubiquitin - Medicago truncatula (Barrel medic), partial (79%) [TC50721]         | 10684.05 | 1 |
| Unknown                                                                                 | 21.72    | 1 |
| gb FS409048 normalized full-length tobacco cDNA library Nicotiana tabacum cDNA          | 25.54    | 1 |
| tc LERYGTOM5 L.esculentum (rY mutant) GTOM5 mRNA for mutant phytoene syntl              | 21.92    | 1 |
| Unknown                                                                                 | 180.6    | 1 |
| gb BP131358 MAT001 Nicotiana tabacum cDNA clone BY3395, mRNA sequence [Bf               | 31.09    | 1 |
| tc Rep: Chromosome chr5 scaffold_2, whole genome shotgun sequence - Vitis vinif         | 158.64   | 1 |
| gb EST_FLW001xo10f1.ab1 EST_FLW Nicotiana tabacum cDNA, mRNA sequence [Ei               | 586.59   | 1 |
| gb AGN_RNC014xk22f1.ab1 AGN_RNC Nicotiana tabacum cDNA 5', mRNA sequenc                 | 39.34    | 1 |
| tc Rep: Predicted protein - Emericella nidulans (Aspergillus nidulans), partial (5%) [1 | 86.74    | 1 |
| Unknown                                                                                 | 229.65   | 1 |
| gb KP1B.101F06F.050722T7 KP1B Nicotiana tabacum cDNA clone KP1B.101F06, mF              | 67.03    | 1 |
| tc Rep: Chromosome chr1 scaffold_135, whole genome shotgun sequence - Vitis vi          | 35.57    | 1 |
| gb KF8C.104F18F.051214T7 KF8 Nicotiana tabacum cDNA clone KF8C.104F18, mRN              | 3236.85  | 1 |
| tc Rep: Chromosome chr8 scaffold_88, whole genome shotgun sequence - Vitis vin          | 3332.82  | 1 |
| Unknown                                                                                 | 34.32    | 1 |
| gb KL4B.101J21F.051103T7 KL4B Nicotiana tabacum cDNA clone KL4B.101J21, mRN             | 32.08    | 1 |
| gb KG9B.003H04F.050720T7 KG9B Nicotiana tabacum cDNA clone KG9B.003H04, n               | 28.87    | 1 |
| tc Rep: Chalcone--flavonone isomerase - Ipomoea purpurea (Common morning glo            | 102.97   | 1 |
| tc Rep: Thylakoid-bound ascorbate peroxidase - Nicotiana tabacum (Common toba           | 19.13    | 1 |
| tc Rep: Maturase K - Nicotiana glutinosa (Tobacco), partial (64%) [TC75865]             | 30.51    | 1 |

|                                                                                   |         |   |
|-----------------------------------------------------------------------------------|---------|---|
| gb CHO_SL014xb10f1.ab1 CHO_SL Nicotiana tabacum cDNA, mRNA sequence [EH6          | 998.79  | 1 |
| Unknown                                                                           | 125.71  | 1 |
| Unknown                                                                           | 21.37   | 1 |
| Unknown                                                                           | 513.02  | 1 |
| gb CHO_SL026xc04f1.ab1 CHO_SL Nicotiana tabacum cDNA, mRNA sequence [EH6:         | 819.88  | 1 |
| gb AGN_RPC022xo13f1.ab1 AGN_RPC Nicotiana tabacum cDNA 5', mRNA sequenc           | 36.81   | 1 |
| Unknown                                                                           | 738.09  | 1 |
| gb KN6B.104I12F.060103T7 KN6B Nicotiana tabacum cDNA clone KN6B.104I12, mF        | 398.45  | 1 |
| gb KL5B.104G13F.060207T7 KL5B Nicotiana tabacum cDNA clone KL5B.104G13, mF        | 266.21  | 1 |
| gb AGN_RPC018xd15f1.ab1 AGN_RPC Nicotiana tabacum cDNA 5', mRNA sequenc           | 27.74   | 1 |
| gb FS429988 normalized full-length tobacco cDNA library Nicotiana tabacum cDNA    | 1818.06 | 1 |
| Unknown                                                                           | 367.77  | 1 |
| tc Rep: Uncharacterized protein At1g04960.2 - Arabidopsis thaliana (Mouse-ear cre | 44.31   | 1 |
| Unknown                                                                           | 37.35   | 1 |
| Unknown                                                                           | 22.12   | 1 |
| Unknown                                                                           | 34.83   | 1 |
| gb AM817974 seedling library, SL Nicotiana tabacum cDNA clone nt002102049, mF     | 203.02  | 1 |
| gb AGN_RPC002xf04f1.ab1 AGN_RPC Nicotiana tabacum cDNA 5', mRNA sequence          | 37.09   | 1 |
| gb TT-03_L03 Samsun trichome library Nicotiana tabacum cDNA, mRNA sequence [      | 26.72   | 1 |
| gb Nicotiana tabacum poly(A)-binding protein (PABP) mRNA, complete cds [AF190     | 11612.2 | 1 |
| Unknown                                                                           | 39.95   | 1 |
| tc Rep: Cyc07 - Nicotiana tabacum (Common tobacco), partial (48%) [TC73875]       | 255.34  | 1 |
| gb KL4B.107J08F.051126T7 KL4B Nicotiana tabacum cDNA clone KL4B.107J08, mRN       | 40.37   | 1 |
| tc Rep: Chromosome chr11 scaffold_170, whole genome shotgun sequence - Vitis v    | 987.66  | 1 |
| Unknown                                                                           | 104.67  | 1 |
| gb CHO_SL022xd02f1.ab1 CHO_SL Nicotiana tabacum cDNA, mRNA sequence [EH6          | 201.79  | 1 |
| gb KR3B.107D17F.051110T7 KR3B Nicotiana tabacum cDNA clone KR3B.107D17, m         | 54.02   | 1 |
| gb TT-33_J14 Samsun trichome library Nicotiana tabacum cDNA, mRNA sequence [      | 3202.52 | 1 |
| tc Rep: Chromosome chr18 scaffold_1, whole genome shotgun sequence - Vitis vin    | 284.64  | 1 |
| gb KG9B.001A06F.050628T7 KG9B Nicotiana tabacum cDNA clone KG9B.001A06, n         | 24.23   | 1 |
| Unknown                                                                           | 24.8    | 1 |
| gb KF8C.110H03F.051216T7 KF8 Nicotiana tabacum cDNA clone KF8C.110H03, mRI        | 19784.4 | 1 |
| tc Rep: Chromosome chr17 scaffold_12, whole genome shotgun sequence - Vitis vi    | 134.31  | 1 |
| tc Rep: BcDNA.GH02712 - Drosophila melanogaster (Fruit fly), partial (7%) [TC5214 | 48.15   | 1 |

|                                                                                      |          |   |
|--------------------------------------------------------------------------------------|----------|---|
| tc Rep: Chromosome chr8 scaffold_23, whole genome shotgun sequence - Vitis vin       | 32.54    | 1 |
| Unknown                                                                              | 61.1     | 1 |
| gb Nicotiana tabacum cDNA-AFLP-fragment BSTT4-11-350, cultivar Bright Yellow 2       | 30.39    | 1 |
| Unknown                                                                              | 18.65    | 1 |
| Unknown                                                                              | 23.49    | 1 |
| gb TT-07_L06 K326 late senescent leaf library Nicotiana tabacum cDNA, mRNA seq       | 81.95    | 1 |
| tc Rep: Predicted protein - Physcomitrella patens subsp. patens, complete [TC4768    | 45.41    | 1 |
| gb FS381087 normalized full-length tobacco cDNA library Nicotiana tabacum cDNA       | 2922.27  | 1 |
| gb AM796827 DL, diurnal library Nicotiana tabacum cDNA clone nt005216065, mRI        | 21.15    | 1 |
| tc Rep: Chromosome chr19 scaffold_4, whole genome shotgun sequence - Vitis vin       | 126.62   | 1 |
| Unknown                                                                              | 26.52    | 1 |
| gb KG9B.106I24F.051129T7 KG9B Nicotiana tabacum cDNA clone KG9B.106I24, mR           | 191.45   | 1 |
| tc Rep: Chromosome chr16 scaffold_94, whole genome shotgun sequence - Vitis vi       | 18.37    | 1 |
| tc Rep: Predicted protein - Physcomitrella patens subsp. patens, partial (48%) [TC65 | 18500.15 | 1 |
| Unknown                                                                              | 2750.77  | 1 |
| gb BP526533 MAT001 Nicotiana tabacum cDNA clone BY11263, mRNA sequence [E            | 556.26   | 1 |
| tc Rep: Chromosome chr6 scaffold_3, whole genome shotgun sequence - Vitis vinif      | 198.6    | 1 |
| tc Rep: Chromosome chr18 scaffold_61, whole genome shotgun sequence - Vitis vi       | 29.93    | 1 |
| Unknown                                                                              | 93.02    | 1 |
| tc Rep: Chromosome chr13 scaffold_152, whole genome shotgun sequence - Vitis v       | 723.46   | 1 |
| tc Rep: Chromosome chr19 scaffold_4, whole genome shotgun sequence - Vitis vin       | 187.8    | 1 |
| gb KN6B.105A24F.060104T7 KN6B Nicotiana tabacum cDNA clone KN6B.105A24, n            | 277.13   | 1 |
| tc Rep: Chromosome chr11 scaffold_13, whole genome shotgun sequence - Vitis vi       | 449.37   | 1 |
| gb AGN_PNL205cr1_e5.trimmed.seq AGN_PNL Nicotiana tabacum cDNA 3', mRNA              | 100.44   | 1 |
| Unknown                                                                              | 88.08    | 1 |
| Unknown                                                                              | 104.21   | 1 |
| gb AGN_PNL228bf1_d5.trimmed.seq AGN_PNL Nicotiana tabacum cDNA 5', mRNA              | 9919.17  | 1 |
| Unknown                                                                              | 42.45    | 1 |
| tc Rep: Chromosome chr1 scaffold_136, whole genome shotgun sequence - Vitis vi       | 2545.85  | 1 |
| tc Rep: Chromosome chr3 scaffold_8, whole genome shotgun sequence - Vitis vinif      | 18.18    | 1 |
| tc Rep: NAD-dependent malic enzyme 62 kDa isoform, mitochondrial precursor - Sc      | 36.5     | 1 |
| tc Rep: Glucose-6-phosphate/phosphate translocator 1, chloroplast precursor - Ara    | 215.47   | 1 |
| gb AGN_RPC018xh17f1.ab1 AGN_RPC Nicotiana tabacum cDNA 5', mRNA sequenc              | 194.57   | 1 |
| tc Rep: ATPase - Camellia sinensis (Tea), complete [TC71603]                         | 1525.01  | 1 |

|                                                                                            |         |   |
|--------------------------------------------------------------------------------------------|---------|---|
| Unknown                                                                                    | 72.67   | 1 |
| Unknown                                                                                    | 41.27   | 1 |
| Unknown                                                                                    | 22.32   | 1 |
| tc Rep: Chromosome chr4 scaffold_6, whole genome shotgun sequence - Vitis vinifera         | 201.81  | 1 |
| gb CHO_SL014xb22f1.ab1 CHO_SL Nicotiana tabacum cDNA, mRNA sequence [EH658990]             | 3288.78 | 1 |
| tc Rep: Chromosome chr15 scaffold_19, whole genome shotgun sequence - Vitis vinifera       | 47.84   | 1 |
| tc Rep: Chromosome chr18 scaffold_1, whole genome shotgun sequence - Vitis vinifera        | 794.67  | 1 |
| gb Nicotiana tabacum cultivar Havana SR1 cytosine-5-methyltransferase (MET1) mRNA          | 21.03   | 1 |
| gb KP1B.037G07F.050623T7 KP1B Nicotiana tabacum cDNA clone KP1B.037G07, mRNA               | 21.81   | 1 |
| tc Rep: Enoyl-CoA hydratase/isomerase - Medicago truncatula (Barrel medic), partial        | 1064.82 | 1 |
| gb AGN_ELP025xp16f1.ab1 AGN_ELP Nicotiana tabacum cDNA 5', mRNA sequence                   | 238.82  | 1 |
| gb KT7C.112H06F.051221T7 KT7 Nicotiana tabacum cDNA clone KT7C.112H06, mRNA                | 1903.76 | 1 |
| Unknown                                                                                    | 28.86   | 1 |
| gb KN6B.106O01F.060104T7 KN6B Nicotiana tabacum cDNA clone KN6B.106O01, mRNA               | 23.19   | 1 |
| tc Rep: Predicted protein - Chlamydomonas reinhardtii, partial (9%) [TC58990]              | 31.24   | 1 |
| tc Rep: F17F8.6 - Arabidopsis thaliana (Mouse-ear cress), partial (68%) [TC47498]          | 95.26   | 1 |
| gb N.tabacum mRNA ap24 [X65700]                                                            | 18.07   | 1 |
| gb AGN_ELP007xh11f1.ab1 AGN_ELP Nicotiana tabacum cDNA 5', mRNA sequence                   | 20.94   | 1 |
| tc Rep: Oligopeptidase A - Medicago truncatula (Barrel medic), partial (98%) [TC46590]     | 22.75   | 1 |
| tc Rep: Histone H3 - Nematostella vectensis (Starlet sea anemone), partial (97%) [TC46590] | 28.02   | 1 |
| tc Rep: Chromosome chr16 scaffold_189, whole genome shotgun sequence - Vitis vinifera      | 433.72  | 1 |
| Unknown                                                                                    | 390.84  | 1 |
| gb KL4B.112G20F.060131T7 KL4B Nicotiana tabacum cDNA clone KL4B.112G20, mRNA               | 38.36   | 1 |
| tc Rep: Chromosome undetermined scaffold_87, whole genome shotgun sequence                 | 274.56  | 1 |
| gb KG9B.003D22F.050720T7 KG9B Nicotiana tabacum cDNA clone KG9B.003D22, mRNA               | 532.79  | 1 |
| gb KL4B.104C12F.051104T7 KL4B Nicotiana tabacum cDNA clone KL4B.104C12, mRNA               | 511.6   | 1 |
| gb AGN_RNC024xc06r1.ab1 AGN_RNC Nicotiana tabacum cDNA 3', mRNA sequence                   | 28.83   | 1 |
| gb AGN_RNC110xf13f1.ab1 AGN_RNC Nicotiana tabacum cDNA 5', mRNA sequence                   | 28.07   | 1 |
| tc Rep: Predicted protein - Physcomitrella patens subsp. patens, partial (6%) [TC65990]    | 28.94   | 1 |
| gb TT-28_H09 K326 late senescent leaf library Nicotiana tabacum cDNA, mRNA sequence        | 222.09  | 1 |
| gb KL4B.109E12F.051106T7 KL4B Nicotiana tabacum cDNA clone KL4B.109E12, mRNA               | 20.58   | 1 |
| gb CHO_SL015xe18f2.ab1 CHO_SL Nicotiana tabacum cDNA, mRNA sequence [EH658990]             | 25.96   | 1 |
| tc Rep: Chromosome chr18 scaffold_1, whole genome shotgun sequence - Vitis vinifera        | 207.88  | 1 |
| Unknown                                                                                    | 4360.61 | 1 |

|                                                                                              |         |   |
|----------------------------------------------------------------------------------------------|---------|---|
| tc Rep: Chromosome chr6 scaffold_3, whole genome shotgun sequence - Vitis vinifera           | 151.36  | 1 |
| tc Rep: 60S ribosomal protein L34 - Nicotiana tabacum (Common tobacco), complete             | 118.03  | 1 |
| Unknown                                                                                      | 80.72   | 1 |
| tc Rep: Transcription factor bZIP63 - Glycine max (Soybean), partial (41%) [TC7400C]         | 133.84  | 1 |
| tc Rep: Chromosome chr8 scaffold_29, whole genome shotgun sequence - Vitis vinifera          | 412.84  | 1 |
| tc Rep: Chromosome chr6 scaffold_25, whole genome shotgun sequence - Vitis vinifera          | 88.34   | 1 |
| Unknown                                                                                      | 761.26  | 1 |
| Unknown                                                                                      | 6306.85 | 1 |
| tc Rep: Chromosome chr2 scaffold_11, whole genome shotgun sequence - Vitis vinifera          | 244.16  | 1 |
| gb KL4B.105I22F.051104T7 KL4B Nicotiana tabacum cDNA clone KL4B.105I22, mRNA sequence        | 62.2    | 1 |
| tc Rep: Chromosome undetermined scaffold_174, whole genome shotgun sequence - Vitis vinifera | 520.11  | 1 |
| tc Rep: Chromosome chr5 scaffold_67, whole genome shotgun sequence - Vitis vinifera          | 1057.45 | 1 |
| gb N.tabacum mRNA for phosphoglycerate kinase (chloroplast isoenzyme) [Z48977]               | 43.69   | 1 |
| gb EST_FLW001xi17f1.ab1 EST_FLW Nicotiana tabacum cDNA, mRNA sequence [EHL]                  | 404.01  | 1 |
| Unknown                                                                                      | 222.13  | 1 |
| Unknown                                                                                      | 206.98  | 1 |
| gb AGN_RPC023xa05f1.ab1 AGN_RPC Nicotiana tabacum cDNA 5', mRNA sequence                     | 225.12  | 1 |
| tc Rep: Chromosome chr15 scaffold_19, whole genome shotgun sequence - Vitis vinifera         | 228.33  | 1 |
| tc Rep: Chromosome chr14 scaffold_9, whole genome shotgun sequence - Vitis vinifera          | 185.45  | 1 |
| gb KL4B.104M07F.051104T7 KL4B Nicotiana tabacum cDNA clone KL4B.104M07, mRNA sequence        | 21.51   | 1 |
| Unknown                                                                                      | 22.53   | 1 |
| gb KF8B.200A23F.060120T7 KF8 Nicotiana tabacum cDNA clone KF8B.200A23, mRNA sequence         | 57.2    | 1 |
| gb KG9B.102G04F.051126T7 KG9B Nicotiana tabacum cDNA clone KG9B.102G04, mRNA sequence        | 62.17   | 1 |
| gb AGN_ELP024xk02f1.ab1 AGN_ELP Nicotiana tabacum cDNA 5', mRNA sequence                     | 58.54   | 1 |
| gb KT7C.113I24F.051221T7 KT7 Nicotiana tabacum cDNA clone KT7C.113I24, mRNA sequence         | 165.39  | 1 |
| Unknown                                                                                      | 20.24   | 1 |
| Unknown                                                                                      | 31.15   | 1 |
| gb N.tabacum mRNA for inorganic pyrophosphatase (TVP5clone) [X77915]                         | 253.38  | 1 |
| Unknown                                                                                      | 43.63   | 1 |
| gb KL4B.107E16F.051126T7 KL4B Nicotiana tabacum cDNA clone KL4B.107E16, mRNA sequence        | 9523.83 | 1 |
| tc Rep: Chromosome chr12 scaffold_47, whole genome shotgun sequence - Vitis vinifera         | 258.03  | 1 |
| gb KN6B.101P09F.051230T7 KN6B Nicotiana tabacum cDNA clone KN6B.101P09, mRNA sequence        | 1030.87 | 1 |
| tc Rep: Chromosome chr17 scaffold_16, whole genome shotgun sequence - Vitis vinifera         | 950.71  | 1 |
| gb CHO_SL005xm05f1.ab1 CHO_SL Nicotiana tabacum cDNA, mRNA sequence [EHL]                    | 1414.11 | 1 |



|                                                                                      |         |   |
|--------------------------------------------------------------------------------------|---------|---|
| gb AGN_RPC018xe15f1.ab1 AGN_RPC Nicotiana tabacum cDNA 5', mRNA sequence             | 42.78   | 1 |
| tc Rep: Small GTPase Rab2 - Capsicum annuum (Bell pepper), complete [TC41836]        | 2855.41 | 1 |
| gb AGN_ELP014xc05f1.ab1 AGN_ELP Nicotiana tabacum cDNA 5', mRNA sequence             | 30.77   | 1 |
| Unknown                                                                              | 23.05   | 1 |
| tc Rep: Chromosome chr14 scaffold_9, whole genome shotgun sequence - Vitis vin       | 85.8    | 1 |
| gb BP528616 MAT001 Nicotiana tabacum cDNA clone BY13472, mRNA sequence [E            | 29.66   | 1 |
| gb KF8B.100M23F.051010T7 KF8 Nicotiana tabacum cDNA clone KF8B.100M23, mF            | 84.33   | 1 |
| tc Rep: Ankyrin repeat-rich protein - Solanum tuberosum (Potato), partial (34%) [T   | 22.94   | 1 |
| tc Rep: Chromosome chr5 scaffold_58, whole genome shotgun sequence - Vitis vin       | 352.34  | 1 |
| Unknown                                                                              | 712.38  | 1 |
| gb AGN_RPC025xl04f1.ab1 AGN_RPC Nicotiana tabacum cDNA 5', mRNA sequence             | 24.69   | 1 |
| tc Rep: Chromosome chr10 scaffold_81, whole genome shotgun sequence - Vitis vi       | 409.63  | 1 |
| Unknown                                                                              | 19.12   | 1 |
| tc Rep: Chromosome undetermined scaffold_525, whole genome shotgun sequenc           | 122.37  | 1 |
| gb AGN_RPC020xb19f1.ab1 AGN_RPC Nicotiana tabacum cDNA 5', mRNA sequence             | 732.18  | 1 |
| Unknown                                                                              | 18.26   | 1 |
| gb N.tabacum mRNA for LIM-domain protein [Y11002]                                    | 501.86  | 1 |
| Unknown                                                                              | 252.51  | 1 |
| Unknown                                                                              | 583.58  | 1 |
| gb KT7C.108F18F.051219T7 KT7 Nicotiana tabacum cDNA clone KT7C.108F18, mRN           | 871.91  | 1 |
| tc Rep: 40S ribosomal protein S15-like - Solanum tuberosum (Potato), complete [T     | 570.48  | 1 |
| gb TOBESTR050A01 TOBEST cDNA library 1 Nicotiana tabacum cDNA 5', mRNA seq           | 839.5   | 1 |
| Unknown                                                                              | 1190.43 | 1 |
| tc Rep: Os07g0680900 protein - Oryza sativa subsp. japonica (Rice), partial (67%) [T | 53.72   | 1 |
| gb TT-49_J01 K326 late senescent leaf library Nicotiana tabacum cDNA, mRNA seq       | 622.36  | 1 |
| Unknown                                                                              | 63.38   | 1 |
| gb KG9B.003G13F.050720T7 KG9B Nicotiana tabacum cDNA clone KG9B.003G13, n            | 26.28   | 1 |
| tc Rep: Chromosome chr14 scaffold_9, whole genome shotgun sequence - Vitis vin       | 141.48  | 1 |
| gb KR3B.110O13F.051111T7 KR3B Nicotiana tabacum cDNA clone KR3B.110O13, m            | 89.91   | 1 |
| gb Nicotiana tabacum cDNA-AFLP-fragment BSTT41-4-210, cultivar Bright Yellow 2       | 40.4    | 1 |
| gb KG9B.106M11F.051129T7 KG9B Nicotiana tabacum cDNA clone KG9B.106M11,              | 211.38  | 1 |
| tc Rep: Chromosome chr3 scaffold_8, whole genome shotgun sequence - Vitis vinif      | 29.2    | 1 |
| tc Rep: Chromosome chr19 scaffold_4, whole genome shotgun sequence - Vitis vin       | 687.89  | 1 |
| tc Rep: Chromosome chr12 scaffold_18, whole genome shotgun sequence - Vitis vi       | 71.95   | 1 |

|                                                                                      |         |   |
|--------------------------------------------------------------------------------------|---------|---|
| gb N.tabacum repeat region (Eco4) [X68590]                                           | 39.11   | 1 |
| tc Rep: Ly200 protein - Capsicum annuum (Bell pepper), complete [TC54024]            | 22.91   | 1 |
| tc Rep: Chromosome chr11 scaffold_177, whole genome shotgun sequence - Vitis v       | 63.13   | 1 |
| gb KN6B.105M11F.060104T7 KN6B Nicotiana tabacum cDNA clone KN6B.105M11,              | 2909.02 | 1 |
| tc Rep: Chromosome chr15 scaffold_40, whole genome shotgun sequence - Vitis vi       | 478.85  | 1 |
| Unknown                                                                              | 26.64   | 1 |
| tc Rep: helicase domain-containing protein - Arabidopsis thaliana, partial (7%) [TC6 | 28.31   | 1 |
| Unknown                                                                              | 92.69   | 1 |
| Unknown                                                                              | 184.16  | 1 |
| gb KF8B.100C21F.051010T7 KF8 Nicotiana tabacum cDNA clone KF8B.100C21, mRN           | 1347.5  | 1 |
| gb KG9B.005C17F.050721T7 KG9B Nicotiana tabacum cDNA clone KG9B.005C17, r            | 151.47  | 1 |
| tc Rep: NADH:cytochrome b5 reductase - Vernicia fordii (Tung) (Aleurites fordii), cc | 106.16  | 1 |
| Unknown                                                                              | 142.83  | 1 |
| tc Rep: Chromosome chr2 scaffold_11, whole genome shotgun sequence - Vitis vin       | 84.21   | 1 |
| tc Rep: Chromosome undetermined scaffold_171, whole genome shotgun sequenc           | 165.24  | 1 |
| gb KT7C.106N04F.051219T7 KT7 Nicotiana tabacum cDNA clone KT7C.106N04, mR            | 35.7    | 1 |
| gb KL4B.106I18F.051125T7 KL4B Nicotiana tabacum cDNA clone KL4B.106I18, mRN          | 23.86   | 1 |
| tc Rep: Chromosome chr6 scaffold_25, whole genome shotgun sequence - Vitis vin       | 17.94   | 1 |
| gb TT-20_G03 Samsun trichome library Nicotiana tabacum cDNA, mRNA sequence           | 2592.46 | 1 |
| Unknown                                                                              | 17.79   | 1 |
| gb AGN_RPC021xo04f1.ab1 AGN_RPC Nicotiana tabacum cDNA 5', mRNA sequenc              | 3330.38 | 1 |
| gb KR2B.002K11F.051019T7 KR2B Nicotiana tabacum cDNA clone KR2B.002K11, mI           | 118.52  | 1 |
| gb KF8C.103D11F.051214T7 KF8 Nicotiana tabacum cDNA clone KF8C.103D11, mRI           | 648.15  | 1 |
| gb Nicotiana tabacum GUT15 mRNA, complete cds [U84972]                               | 3200.72 | 1 |
| gb CHO_SL015xf03f2.ab1 CHO_SL Nicotiana tabacum cDNA, mRNA sequence [EH6:            | 438     | 1 |
| tc Rep: Chromosome chr5 scaffold_67, whole genome shotgun sequence - Vitis vin       | 48.77   | 1 |
| gb TT-50_E13 K326 late senescent leaf library Nicotiana tabacum cDNA, mRNA seq       | 36.27   | 1 |
| tc Rep: Chromosome chr3 scaffold_95, whole genome shotgun sequence - Vitis vin       | 2639.48 | 1 |
| tc Rep: Chromosome chr18 scaffold_1, whole genome shotgun sequence - Vitis vin       | 1445.07 | 1 |
| gb AGN_PNL201af1_d3.trimmed.seq AGN_PNL Nicotiana tabacum cDNA 5', mRNA              | 34472.8 | 1 |
| tc Rep: Chromosome chr14 scaffold_9, whole genome shotgun sequence - Vitis vin       | 2722.59 | 1 |
| Unknown                                                                              | 103.25  | 1 |
| gb KL4B.111C19F.060128T7 KL4B Nicotiana tabacum cDNA clone KL4B.111C19, mR           | 20.5    | 1 |
| Unknown                                                                              | 28.52   | 1 |

|                                                                                   |          |   |
|-----------------------------------------------------------------------------------|----------|---|
| tc Rep: Ribosomal protein S27 - Vitis vinifera (Grape), complete [TC56463]        | 52.21    | 1 |
| gb CHO_SL028xe08f1.ab1 CHO_SL Nicotiana tabacum cDNA, mRNA sequence [EH6          | 25.36    | 1 |
| tc Rep: 60S ribosomal protein L34 - Nicotiana tabacum (Common tobacco), partial i | 155.37   | 1 |
| gb N.tabacum NeIF-4A9 mRNA [X79135]                                               | 57.9     | 1 |
| Unknown                                                                           | 128.32   | 1 |
| tc Rep: Ferrochelatase - Vitis vinifera (Grape), partial (42%) [TC54815]          | 30.89    | 1 |
| tc Rep: AT3g06540/F5E6_13 - Arabidopsis thaliana (Mouse-ear cress), partial (37%) | 466.92   | 1 |
| Unknown                                                                           | 411.58   | 1 |
| Unknown                                                                           | 30.2     | 1 |
| Unknown                                                                           | 21.33    | 1 |
| tc Rep: Chromosome undetermined scaffold_1268, whole genome shotgun sequen        | 138.59   | 1 |
| Unknown                                                                           | 9444.84  | 1 |
| gb TT-29_M10 K326 late senescent leaf library Nicotiana tabacum cDNA, mRNA sec    | 22.25    | 1 |
| tc Rep: Chromosome chr5 scaffold_64, whole genome shotgun sequence - Vitis vin    | 10199.75 | 1 |
| Unknown                                                                           | 30.26    | 1 |
| gb KF8C.110M11F.051216T7 KF8 Nicotiana tabacum cDNA clone KF8C.110M11, mF         | 101.86   | 1 |
| gb KT7C.109E03F.051221T7 KT7 Nicotiana tabacum cDNA clone KT7C.109E03, mRN        | 937.6    | 1 |
| gb KG9B.003H12F.050720T7 KG9B Nicotiana tabacum cDNA clone KG9B.003H12, n         | 142.29   | 1 |
| gb Nicotiana tabacum mRNA for carbamoyl phosphate synthase small subunit [AJ3     | 434.26   | 1 |
| Unknown                                                                           | 20.87    | 1 |
| gb KL5B.118E14F.060217T7 KL5B Nicotiana tabacum cDNA clone KL5B.118E14, mR        | 456.45   | 1 |
| gb Nicotiana tabacum calcium-dependent protein kinase CPK4 mRNA, complete cd      | 1328.68  | 1 |
| tc Rep: Chromosome chr11 scaffold_13, whole genome shotgun sequence - Vitis vi    | 54.19    | 1 |
| gb AGN_ELP009xm05f1.ab1 AGN_ELP Nicotiana tabacum cDNA 5', mRNA sequence          | 56.05    | 1 |
| gb AGN_ELP012xm10f1.ab1 AGN_ELP Nicotiana tabacum cDNA 5', mRNA sequence          | 95.37    | 1 |
| gb KL4B.105P04F.051104T7 KL4B Nicotiana tabacum cDNA clone KL4B.105P04, mR        | 107.87   | 1 |
| gb KP1B.102C22F.050722T7 KP1B Nicotiana tabacum cDNA clone KP1B.102C22, ml        | 62.37    | 1 |
| Unknown                                                                           | 17.19    | 1 |
| Unknown                                                                           | 184.83   | 1 |
| gb KG9B.105K12F.051128T7 KG9B Nicotiana tabacum cDNA clone KG9B.105K12, m         | 250.1    | 1 |
| gb AM801363 seedling library, SL Nicotiana tabacum cDNA clone nt002027020, mF     | 256.34   | 1 |
| Unknown                                                                           | 50.01    | 1 |
| tc Rep: Ethylene-responsive transcription factor 3 - Nicotiana tabacum (Common t  | 7308.04  | 1 |
| gb KL4B.105E10F.051104T7 KL4B Nicotiana tabacum cDNA clone KL4B.105E10, mR        | 60.15    | 1 |

|                                                                                       |         |   |
|---------------------------------------------------------------------------------------|---------|---|
| Unknown                                                                               | 51.66   | 1 |
| tc Rep: Peptide-N4-(N-acetyl-beta-glucosaminyl)asparagine amidase A (PNGase A)        | 37.27   | 1 |
| Unknown                                                                               | 29.33   | 1 |
| gb EST_FLW005xi04f1.ab1 EST_FLW Nicotiana tabacum cDNA, mRNA sequence [E-             | 9806.58 | 1 |
| tc Rep: Aldose 1-epimerase-like protein - Arabidopsis thaliana (Mouse-ear cress), p   | 20.6    | 1 |
| Unknown                                                                               | 1683.85 | 1 |
| tc Rep: Eukaryotic translation initiation factor 5A-3 - Solanum tuberosum (Potato),   | 7317.95 | 1 |
| Unknown                                                                               | 71.46   | 1 |
| Unknown                                                                               | 25.34   | 1 |
| Unknown                                                                               | 188.47  | 1 |
| gb AM791671 DL, diurnal library Nicotiana tabacum cDNA clone nt005009046, mRI         | 23.75   | 1 |
| tc Rep: Chromosome chr14 scaffold_9, whole genome shotgun sequence - Vitis vin        | 3503.91 | 1 |
| gb AGN_RNC211xp11f1.ab1 AGN_RNC Nicotiana tabacum cDNA 5', mRNA sequenc               | 34.14   | 1 |
| tc Rep: U1snRNP-specific protein, U1A - Solanum tuberosum (Potato), partial (98%      | 89.48   | 1 |
| Unknown                                                                               | 10027.7 | 1 |
| tc Rep: Chromosome chr19 scaffold_4, whole genome shotgun sequence - Vitis vin        | 344.94  | 1 |
| Unknown                                                                               | 4676.01 | 1 |
| tc Rep: Pyruvate kinase - Oryza sativa subsp. japonica (Rice), partial (28%) [TC74474 | 254.42  | 1 |
| Unknown                                                                               | 31.85   | 1 |
| tc Rep: Prolyl 4-hydroxylase - Dianthus caryophyllus (Carnation) (Clove pink), partia | 93.94   | 1 |
| Unknown                                                                               | 184.49  | 1 |
| gb AGN_RNC125xp24f1.ab1 AGN_RNC Nicotiana tabacum cDNA 5', mRNA sequenc               | 535.25  | 1 |
| tc Rep: Chromosome chr4 scaffold_6, whole genome shotgun sequence - Vitis vinif       | 47.51   | 1 |
| tc Rep: Chromosome chr19 scaffold_66, whole genome shotgun sequence - Vitis vi        | 181.27  | 1 |
| gb KL4B.105O01F.051104T7 KL4B Nicotiana tabacum cDNA clone KL4B.105O01, mF            | 589.53  | 1 |
| Unknown                                                                               | 87.27   | 1 |
| tc Rep: Vacuolar ATP synthase catalytic subunit A - Daucus carota (Carrot), partial ( | 1407.6  | 1 |
| gb AM793907 seedling library, SL Nicotiana tabacum cDNA clone nt002270041, mF         | 43.35   | 1 |
| Unknown                                                                               | 26.87   | 1 |
| Unknown                                                                               | 229.06  | 1 |
| gb CHO_SL024xi23f1.ab1 CHO_SL Nicotiana tabacum cDNA, mRNA sequence [EH62             | 1127.7  | 1 |
| tc Rep: 40S ribosomal protein S23 - Fragaria ananassa (Strawberry), complete [TC4!    | 60.39   | 1 |
| gb KG9B.106A07F.051129T7 KG9B Nicotiana tabacum cDNA clone KG9B.106A07, n             | 57.54   | 1 |
| tc Rep: Chromosome chr19 scaffold_4, whole genome shotgun sequence - Vitis vin        | 258.47  | 1 |

|                                                                                      |          |   |
|--------------------------------------------------------------------------------------|----------|---|
| tc Rep: Malate dehydrogenase - Solanum tuberosum (Potato), partial (62%) [TC454      | 143.82   | 1 |
| gb KL4B.101K11F.051103T7 KL4B Nicotiana tabacum cDNA clone KL4B.101K11, mR           | 573.94   | 1 |
| gb KT7C.108A21F.051219T7 KT7 Nicotiana tabacum cDNA clone KT7C.108A21, mRI           | 134.9    | 1 |
| Unknown                                                                              | 39.61    | 1 |
| gb TT-05_D19 Samsun trichome library Nicotiana tabacum cDNA, mRNA sequence           | 3050.42  | 1 |
| tc Rep: Chromosome chr1 scaffold_5, whole genome shotgun sequence - Vitis vinif      | 135.24   | 1 |
| gb AM789234 seedling library, SL Nicotiana tabacum cDNA clone nt002190071, mR        | 5756.97  | 1 |
| tc Rep: Expressed protein - Arabidopsis thaliana (Mouse-ear cress), partial (5%) [TC | 759.19   | 1 |
| gb BP129233 MAT001 Nicotiana tabacum cDNA clone BY1074, mRNA sequence [BF            | 2097.46  | 1 |
| gb Nicotiana tabacum A26 mRNA for NtEPc-like protein, complete cds [AB032528]        | 21.39    | 1 |
| gb KN6B.102G19F.051230T7 KN6B Nicotiana tabacum cDNA clone KN6B.102G19, r            | 520.48   | 1 |
| tc Rep: Cystathionine gamma-synthase isoform 2 - Solanum tuberosum (Potato), pi      | 7966.72  | 1 |
| tc Rep: Ketol-acid reductoisomerase, chloroplast precursor - Spinacia oleracea (Spi  | 337.91   | 1 |
| tc Rep: Chromosome chr6 scaffold_3, whole genome shotgun sequence - Vitis vinif      | 494.84   | 1 |
| gb KL4B.107L17F.051126T7 KL4B Nicotiana tabacum cDNA clone KL4B.107L17, mRI          | 570      | 1 |
| Unknown                                                                              | 78.99    | 1 |
| gb KF8B.100E05F.051010T7 KF8 Nicotiana tabacum cDNA clone KF8B.100E05, mRN           | 22.98    | 1 |
| gb KF8C.109I04F.051215T7 KF8 Nicotiana tabacum cDNA clone KF8C.109I04, mRN/          | 31.05    | 1 |
| gb KP1B.102O01F.050722T7 KP1B Nicotiana tabacum cDNA clone KP1B.102O01, m            | 90.96    | 1 |
| tc Rep: Chromosome chr6 scaffold_3, whole genome shotgun sequence - Vitis vinif      | 684.87   | 1 |
| gb Nicotiana tabacum partial mRNA for hypothetical protein, clone PBF80non [AJ3-     | 47.7     | 1 |
| tc Rep: Chromosome undetermined scaffold_171, whole genome shotgun sequenc           | 21.03    | 1 |
| gb TOBESTR033H07 TOBEST cDNA library 1 Nicotiana tabacum cDNA 5', mRNA seq           | 51.16    | 1 |
| Unknown                                                                              | 19.48    | 1 |
| gb TT-09_I07 K326 early senescent leaf library Nicotiana tabacum cDNA, mRNA sec      | 21.06    | 1 |
| gb Nicotiana tabacum mRNA for protein phosphatase 2A catalytic subunit [AJ0074!      | 721.88   | 1 |
| gb KL4B.103B21F.051103T7 KL4B Nicotiana tabacum cDNA clone KL4B.103B21, mR           | 1040.12  | 1 |
| gb KN6B.105F14F.060104T7 KN6B Nicotiana tabacum cDNA clone KN6B.105F14, m            | 53.52    | 1 |
| gb KP1B.101G01F.050722T7 KP1B Nicotiana tabacum cDNA clone KP1B.101G01, m            | 7202.28  | 1 |
| gb AGN_RNC029xc12r1.ab1 AGN_RNC Nicotiana tabacum cDNA 3', mRNA sequenc              | 22.14    | 1 |
| gb Nicotiana tabacum NtFAD3 mRNA for microsomal omega-3 acid desaturase, cor         | 41833.85 | 1 |
| gb AGN_RNC024xc10f1.ab1 AGN_RNC Nicotiana tabacum cDNA 5', mRNA sequenc              | 77.83    | 1 |
| Unknown                                                                              | 70.83    | 1 |
| Unknown                                                                              | 35.37    | 1 |

|                                                                                      |         |   |
|--------------------------------------------------------------------------------------|---------|---|
| Unknown                                                                              | 230.4   | 1 |
| tc Rep: Chromosome chr7 scaffold_42, whole genome shotgun sequence - Vitis vin       | 114.25  | 1 |
| Unknown                                                                              | 375.43  | 1 |
| gb KF8B.100O01F.051010T7 KF8 Nicotiana tabacum cDNA clone KF8B.100O01, mRl           | 519.19  | 1 |
| gb CHO_SL023xh08f1.ab1 CHO_SL Nicotiana tabacum cDNA, mRNA sequence [EH6             | 84.55   | 1 |
| gb KF8C.105P14F.051215T7 KF8 Nicotiana tabacum cDNA clone KF8C.105P14, mRN           | 41.4    | 1 |
| tc Rep: Chromosome chr7 scaffold_31, whole genome shotgun sequence - Vitis vin       | 41.01   | 1 |
| Unknown                                                                              | 251.9   | 1 |
| tc Rep: Chromosome chr17 scaffold_12, whole genome shotgun sequence - Vitis vi       | 107.99  | 1 |
| gb AM829948 seedling library, SL Nicotiana tabacum cDNA clone nt002139094, mF        | 174.58  | 1 |
| tc Rep: Chromosome chr10 scaffold_179, whole genome shotgun sequence - Vitis v       | 19.85   | 1 |
| tc Rep: 60S ribosomal protein L7A-like protein - Solanum tuberosum (Potato), com     | 30.23   | 1 |
| gb KN6B.101A21F.051230T7 KN6B Nicotiana tabacum cDNA clone KN6B.101A21, n            | 35.23   | 1 |
| gb KG9B.103N02F.051128T7 KG9B Nicotiana tabacum cDNA clone KG9B.103N02, n            | 673.11  | 1 |
| tc Rep: Ribosomal protein PETRP - Capsicum annuum (Bell pepper), complete [TC4:      | 132.81  | 1 |
| Unknown                                                                              | 84.19   | 1 |
| gb TT-17_E04 Burley21 trichome library Nicotiana tabacum cDNA, mRNA sequence         | 2907.79 | 1 |
| gb BP129575 MAT001 Nicotiana tabacum cDNA clone BY1446, mRNA sequence [BF            | 23.32   | 1 |
| Unknown                                                                              | 96.75   | 1 |
| gb AGN_RNC013xb13f1.ab1 AGN_RNC Nicotiana tabacum cDNA 5', mRNA sequenc              | 31.92   | 1 |
| tc Rep: Chromosome chr1 scaffold_5, whole genome shotgun sequence - Vitis vinif      | 115.76  | 1 |
| tc Rep: 40S ribosomal protein S4 - Solanum tuberosum (Potato), complete [TC4076      | 129.89  | 1 |
| gb TT-47_D22 Burley21 trichome library Nicotiana tabacum cDNA, mRNA sequence         | 23.53   | 1 |
| tc Rep: Chromosome chr11 scaffold_13, whole genome shotgun sequence - Vitis vi       | 254.63  | 1 |
| tc Rep: Chromosome undetermined scaffold_448, whole genome shotgun sequenc           | 84.96   | 1 |
| gb AGN_RPC014xk09f1.ab1 AGN_RPC Nicotiana tabacum cDNA 5', mRNA sequence             | 33.01   | 1 |
| Unknown                                                                              | 270.7   | 1 |
| tc Rep: PSI-H precursor - Nicotiana sylvestris (Wood tobacco), partial (50%) [TC555- | 29.75   | 1 |
| gb KF8B.202H20F.060124T7 KF8 Nicotiana tabacum cDNA clone KF8B.202H20, mRl           | 45.2    | 1 |
| tc Rep: Expressed protein - Arabidopsis thaliana (Mouse-ear cress), partial (17%) [T | 36.95   | 1 |
| gb TT-23_F13 K326 trichome library Nicotiana tabacum cDNA, mRNA sequence [FG         | 1420.32 | 1 |
| gb TT-03_G14 Burley21 trichome library Nicotiana tabacum cDNA, mRNA sequence         | 263.65  | 1 |
| Unknown                                                                              | 32.44   | 1 |
| tc Rep: Chromosome chr18 scaffold_137, whole genome shotgun sequence - Vitis v       | 99.24   | 1 |

|                                                                                      |          |   |
|--------------------------------------------------------------------------------------|----------|---|
| tc Rep: Chromosome chr19 scaffold_4, whole genome shotgun sequence - Vitis vin       | 46.57    | 1 |
| Unknown                                                                              | 101.53   | 1 |
| gb KG9B.002F23F.050720T7 KG9B Nicotiana tabacum cDNA clone KG9B.002F23, m            | 104.54   | 1 |
| Unknown                                                                              | 38.18    | 1 |
| Unknown                                                                              | 31.26    | 1 |
| tc Rep: Chromosome chr8 scaffold_29, whole genome shotgun sequence - Vitis vin       | 186.96   | 1 |
| gb KR2B.109N16F.051229T7 KR2B Nicotiana tabacum cDNA clone KR2B.109N16, m            | 260.23   | 1 |
| gb TT-06_D09 Samsun trichome library Nicotiana tabacum cDNA, mRNA sequence           | 18.7     | 1 |
| gb KL4B.108E19F.051105T7 KL4B Nicotiana tabacum cDNA clone KL4B.108E19, mR           | 30.27    | 1 |
| tc Rep: Chromosome undetermined scaffold_91, whole genome shotgun sequence           | 36.26    | 1 |
| gb KT7C.109M19F.051221T7 KT7 Nicotiana tabacum cDNA clone KT7C.109M19, ml            | 1315.22  | 1 |
| Unknown                                                                              | 85.6     | 1 |
| gb AGN_RNC008xp03f1.ab1 AGN_RNC Nicotiana tabacum cDNA 5', mRNA sequenc              | 1199.03  | 1 |
| gb BP533801 MAT005 Nicotiana tabacum cDNA clone BY31121, mRNA sequence [E            | 254.2    | 1 |
| gb AGN_RPC010xa17f1.ab1 AGN_RPC Nicotiana tabacum cDNA 5', mRNA sequenc              | 253.09   | 1 |
| tc Rep: Chromosome chr17 scaffold_12, whole genome shotgun sequence - Vitis vi       | 18.68    | 1 |
| gb KG9B.001L02F.050628T7 KG9B Nicotiana tabacum cDNA clone KG9B.001L02, m            | 194.96   | 1 |
| gb AM827696 seedling library, SL Nicotiana tabacum cDNA clone nt002053082, mF        | 67.88    | 1 |
| gb CHO_SL008xi09f1.ab1 CHO_SL Nicotiana tabacum cDNA, mRNA sequence [EH62            | 350.39   | 1 |
| tc Rep: Urate oxidase - Nicotiana tabacum (Common tobacco), complete [TC40906        | 28.16    | 1 |
| gb AGN_RNC003xe02f1.ab1 AGN_RNC Nicotiana tabacum cDNA 5', mRNA sequenc              | 31.96    | 1 |
| Unknown                                                                              | 23.79    | 1 |
| Unknown                                                                              | 19.52    | 1 |
| tc Rep: Small subunit ribosomal protein - Berberis thunbergii (Japanese barberry), Ꞥ | 520.04   | 1 |
| tc Rep: Sulfate adenylyltransferase - Solanum tuberosum (Potato), partial (37%) [TC  | 5268.74  | 1 |
| gb AGN_RNC012xg16f1.ab1 AGN_RNC Nicotiana tabacum cDNA 5', mRNA sequenc              | 111.45   | 1 |
| Unknown                                                                              | 103.93   | 1 |
| tc Rep: Chromosome chr13 scaffold_48, whole genome shotgun sequence - Vitis vi       | 3314.99  | 1 |
| gb AGN_RPC006xp21f1.ab1 AGN_RPC Nicotiana tabacum cDNA 5', mRNA sequenc              | 26.21    | 1 |
| gb CHO_SL006xd12f1.ab1 CHO_SL Nicotiana tabacum cDNA, mRNA sequence [EH6             | 18055.15 | 1 |
| Unknown                                                                              | 94.41    | 1 |
| gb Nicotiana tabacum peptidyl-prolyl cis [EF051139]                                  | 36.62    | 1 |
| gb KG9B.104B16F.060120T7 KG9B Nicotiana tabacum cDNA clone KG9B.104B16, r            | 51.07    | 1 |
| Unknown                                                                              | 21.2     | 1 |

|                                                                                      |         |   |
|--------------------------------------------------------------------------------------|---------|---|
| gb AGN_RNC029xc03r1.ab1 AGN_RNC Nicotiana tabacum cDNA 3', mRNA sequenc              | 17.77   | 1 |
| gb BP133207 MAT001 Nicotiana tabacum cDNA clone BY5446, mRNA sequence [BF            | 112.93  | 1 |
| gb KT7B.100K11F.051010T7 KT7 Nicotiana tabacum cDNA clone KT7B.100K11, mRN           | 511.52  | 1 |
| tc Rep: Chromosome chr4 scaffold_83, whole genome shotgun sequence - Vitis vin       | 62.49   | 1 |
| gb AM783661 seedling library, SL Nicotiana tabacum cDNA clone nt002328038, mF        | 147.62  | 1 |
| tc Rep: Chromosome chr18 scaffold_1, whole genome shotgun sequence - Vitis vin       | 27.41   | 1 |
| tc Rep: Chromosome chr7 scaffold_31, whole genome shotgun sequence - Vitis vin       | 1364.1  | 1 |
| Unknown                                                                              | 746.77  | 1 |
| Unknown                                                                              | 25.41   | 1 |
| tc Rep: 60S ribosomal protein L19 - Capsicum annuum (Bell pepper), partial (80%) [   | 155.2   | 1 |
| Unknown                                                                              | 39.21   | 1 |
| Unknown                                                                              | 845.67  | 1 |
| gb KP1B.103P19F.050725T7 KP1B Nicotiana tabacum cDNA clone KP1B.103P19, mF           | 24.15   | 1 |
| Unknown                                                                              | 57559.3 | 1 |
| tc Rep: Chromosome chr14 scaffold_9, whole genome shotgun sequence - Vitis vin       | 28.08   | 1 |
| tc Rep: Chromosome chr14 scaffold_9, whole genome shotgun sequence - Vitis vin       | 34.65   | 1 |
| gb Nicotiana tabacum cDNA-AFLP-fragment BSTT22-1-195, cultivar Bright Yellow 2       | 156.73  | 1 |
| gb KT7C.110P12F.051221T7 KT7 Nicotiana tabacum cDNA clone KT7C.110P12, mRN           | 2784.58 | 1 |
| Unknown                                                                              | 22.31   | 1 |
| Unknown                                                                              | 516.04  | 1 |
| tc Rep: Thylakoid lumenal 15.0 kDa protein 2, chloroplast precursor - Arabidopsis tl | 80.09   | 1 |
| tc Rep: Chromosome chr14 scaffold_27, whole genome shotgun sequence - Vitis vi       | 63.43   | 1 |
| gb AGN_PNL205cf1_b2.trimmed.seq AGN_PNL Nicotiana tabacum cDNA 5', mRNA              | 18.42   | 1 |
| gb AGN_RPC015xi11f1.ab1 AGN_RPC Nicotiana tabacum cDNA 5', mRNA sequence             | 25.08   | 1 |
| tc Rep: Chromosome chr18 scaffold_1, whole genome shotgun sequence - Vitis vin       | 1585.68 | 1 |
| Unknown                                                                              | 60.25   | 1 |
| Unknown                                                                              | 1466.48 | 1 |
| Unknown                                                                              | 24.9    | 1 |
| Unknown                                                                              | 49.38   | 1 |
| gb ntsm8 embryogenic microspores Nicotiana tabacum cDNA, mRNA sequence [EB           | 108.14  | 1 |
| gb KG9B.101P14F.060120T7 KG9B Nicotiana tabacum cDNA clone KG9B.101P14, m            | 19.54   | 1 |
| tc Rep: Chromosome chr2 scaffold_11, whole genome shotgun sequence - Vitis vin       | 28.82   | 1 |
| tc Rep: Chromosome chr1 scaffold_75, whole genome shotgun sequence - Vitis vin       | 40.87   | 1 |
| gb AGN_PNL215dr1_f7.trimmed.seq AGN_PNL Nicotiana tabacum cDNA 3', mRNA              | 61      | 1 |



|                                                                                                   |         |   |
|---------------------------------------------------------------------------------------------------|---------|---|
| gb AM835641 COL, cold overnight library <i>Nicotiana tabacum</i> cDNA clone nt006016              | 29.4    | 1 |
| tc Rep: Chromosome chr6 scaffold_3, whole genome shotgun sequence - <i>Vitis vinifera</i>         | 107.42  | 1 |
| Unknown                                                                                           | 33.45   | 1 |
| Unknown                                                                                           | 14869.2 | 1 |
| gb AM845282 seedling library, SL <i>Nicotiana tabacum</i> cDNA clone nt002332051, mRNA sequence   | 935.96  | 1 |
| gb AGN_RPC020xa07f1.ab1 AGN_RPC <i>Nicotiana tabacum</i> cDNA 5', mRNA sequence                   | 182.18  | 1 |
| Unknown                                                                                           | 22.52   | 1 |
| gb KR3B.113P03F.060119T7 KR3B <i>Nicotiana tabacum</i> cDNA clone KR3B.113P03, mRNA sequence      | 1211.86 | 1 |
| Unknown                                                                                           | 134.1   | 1 |
| gb AGN_RNC007xl24f1.ab1 AGN_RNC <i>Nicotiana tabacum</i> cDNA 5', mRNA sequence                   | 295.29  | 1 |
| gb KT7C.110O11F.051221T7 KT7 <i>Nicotiana tabacum</i> cDNA clone KT7C.110O11, mRNA sequence       | 5186.49 | 1 |
| gb CHO_SL016xh03f1.ab1 CHO_SL <i>Nicotiana tabacum</i> cDNA, mRNA sequence [EH6]                  | 3849    | 1 |
| gb TT-36_P10 Samsun trichome library <i>Nicotiana tabacum</i> cDNA, mRNA sequence                 | 30.64   | 1 |
| tc Rep: 14-3-3 protein - <i>Nicotiana tabacum</i> (Common tobacco), partial (98%) [TC44]          | 52.53   | 1 |
| tc Rep: Chromosome chr14 scaffold_26, whole genome shotgun sequence - <i>Vitis vinifera</i>       | 21.81   | 1 |
| Unknown                                                                                           | 1056.09 | 1 |
| gb TT-38_K22 Burley21 trichome library <i>Nicotiana tabacum</i> cDNA, mRNA sequence               | 485.73  | 1 |
| gb KT7C.112M02F.051221T7 KT7 <i>Nicotiana tabacum</i> cDNA clone KT7C.112M02, mRNA sequence       | 796.72  | 1 |
| gb TT-30_F03 Samsun trichome library <i>Nicotiana tabacum</i> cDNA, mRNA sequence                 | 165.16  | 1 |
| gb  <i>Nicotiana tabacum</i> plastid phosphate [U66402]                                           | 199.61  | 1 |
| tc Rep: Like-Sm ribonucleoprotein-related, core - <i>Medicago truncatula</i> (Barrel medic)       | 30.07   | 1 |
| gb KT7C.102F13F.051216T7 KT7 <i>Nicotiana tabacum</i> cDNA clone KT7C.102F13, mRNA sequence       | 262.69  | 1 |
| Unknown                                                                                           | 107.96  | 1 |
| gb KG9B.104O21F.060120T7 KG9B <i>Nicotiana tabacum</i> cDNA clone KG9B.104O21, mRNA sequence      | 24.7    | 1 |
| tc Rep: Chromosome chr12 scaffold_36, whole genome shotgun sequence - <i>Vitis vinifera</i>       | 5394.17 | 1 |
| tc Rep: DnaJ-like protein isoform - <i>Solanum phureja</i> , partial (75%) [TC43875]              | 395.95  | 1 |
| gb KN6B.105G06F.060104T7 KN6B <i>Nicotiana tabacum</i> cDNA clone KN6B.105G06, mRNA sequence      | 211.11  | 1 |
| tc Rep: 1-acyl-sn-glycerol-3-phosphate acyltransferase - <i>Prunus dulcis</i> (Almond) (Prunella) | 3995.65 | 1 |
| gb TL13.106B21F.060315T7 TL13 <i>Nicotiana tabacum</i> cDNA clone TL13.106B21, mRNA sequence      | 159.4   | 1 |
| tc Rep: Peroxidase - <i>Nicotiana tabacum</i> (Common tobacco), partial (65%) [TC69233]           | 44.66   | 1 |
| gb FS425927 normalized full-length tobacco cDNA library <i>Nicotiana tabacum</i> cDNA             | 16986.4 | 1 |
| tc Rep: Chromosome chr5 scaffold_2, whole genome shotgun sequence - <i>Vitis vinifera</i>         | 134.74  | 1 |
| tc AAD27719.1 - <i>Arabidopsis thaliana</i> (Mouse-ear cress), partial (46%) [TC55496]            | 87.97   | 1 |
| gb KG9B.005F14F.050721T7 KG9B <i>Nicotiana tabacum</i> cDNA clone KG9B.005F14, mRNA sequence      | 29.3    | 1 |

|                                                                                      |          |   |
|--------------------------------------------------------------------------------------|----------|---|
| gb KF8B.200P08F.060120T7 KF8 Nicotiana tabacum cDNA clone KF8B.200P08, mRNA          | 28199.55 | 1 |
| Unknown                                                                              | 514.49   | 1 |
| gb CHO_SL022xi08f1.ab1 CHO_SL Nicotiana tabacum cDNA, mRNA sequence [EH61            | 194.49   | 1 |
| Unknown                                                                              | 57.53    | 1 |
| gb KP1B.103B19F.050725T7 KP1B Nicotiana tabacum cDNA clone KP1B.103B19, m            | 103.82   | 1 |
| tc Rep: Chromosome chr18 scaffold_24, whole genome shotgun sequence - Vitis vi       | 60.37    | 1 |
| tc Rep: Chromosome chr7 scaffold_31, whole genome shotgun sequence - Vitis vin       | 35.96    | 1 |
| gb KF8C.102P14F.051214T7 KF8 Nicotiana tabacum cDNA clone KF8C.102P14, mRNA          | 24.35    | 1 |
| gb TT-06_E05 K326 late senescent leaf library Nicotiana tabacum cDNA, mRNA seq       | 47.97    | 1 |
| gb CHO_SL022xi08f1.ab1 CHO_SL Nicotiana tabacum cDNA, mRNA sequence [EH61            | 224.94   | 1 |
| gb KG9B.103I21F.051128T7 KG9B Nicotiana tabacum cDNA clone KG9B.103I21, mR           | 39.51    | 1 |
| gb AGN_RPC018xk07f1.ab1 AGN_RPC Nicotiana tabacum cDNA 5', mRNA sequenc              | 18.94    | 1 |
| gb CHO_SL007xo02f1.ab1 CHO_SL Nicotiana tabacum cDNA, mRNA sequence [EH6             | 972.24   | 1 |
| Unknown                                                                              | 122.94   | 1 |
| tc Rep: Chromosome undetermined scaffold_69, whole genome shotgun sequence           | 10669.2  | 1 |
| gb CHO_SL002xf06f1.ab1 CHO_SL Nicotiana tabacum cDNA, mRNA sequence [EH62            | 24.71    | 1 |
| gb Nicotiana tabacum mRNA for peroxidase, complete cds, clone:NTPXC8.1 [AB044        | 30.14    | 1 |
| tc Rep: Chromosome undetermined scaffold_1179, whole genome shotgun sequen           | 9455.55  | 1 |
| gb TT-48_C09 K326 late senescent leaf library Nicotiana tabacum cDNA, mRNA seq       | 358.4    | 1 |
| tc Rep: BZIP transcription factor bZIP124 - Glycine max (Soybean), partial (54%) [TC | 572.48   | 1 |
| tc Rep: Chromosome chr14 scaffold_9, whole genome shotgun sequence - Vitis vin       | 22.82    | 1 |
| Unknown                                                                              | 17.98    | 1 |
| Unknown                                                                              | 81.63    | 1 |
| Unknown                                                                              | 332.8    | 1 |
| Unknown                                                                              | 107.21   | 1 |
| Unknown                                                                              | 34.7     | 1 |
| gb Nicotiana tabacum mRNA for shaggy-like kinase 59 [AJ002315]                       | 948.88   | 1 |
| tc Rep: Chromosome undetermined scaffold_91, whole genome shotgun sequence           | 157.53   | 1 |
| tc Rep: Chromosome chr1 scaffold_84, whole genome shotgun sequence - Vitis vin       | 76.74    | 1 |
| tc Rep: Ethylene-responsive element binding protein 6 - Nicotiana tabacum (Comm      | 531.54   | 1 |
| gb KR3B.108M05F.051110T7 KR3B Nicotiana tabacum cDNA clone KR3B.108M05, r            | 21958.8  | 1 |
| tc Rep: Chromosome chr4 scaffold_32, whole genome shotgun sequence - Vitis vin       | 20.32    | 1 |
| gb KP1B.110I21F.050727T7 KP1B Nicotiana tabacum cDNA clone KP1B.110I21, mR           | 174.23   | 1 |
| tc Rep: Chromosome chr14 scaffold_63, whole genome shotgun sequence - Vitis vi       | 512.01   | 1 |

|                                                                                      |         |   |
|--------------------------------------------------------------------------------------|---------|---|
| tc Rep: ATP synthase subunit delta', mitochondrial precursor - Ipomoea batatas (Sv   | 681.01  | 1 |
| Unknown                                                                              | 486.58  | 1 |
| tc Rep: G/HBF-1 - Glycine max (Soybean), complete [TC48109]                          | 653.44  | 1 |
| Unknown                                                                              | 377.37  | 1 |
| tc Rep: Serine acetyltransferase 1 - Nicotiana tabacum (Common tobacco), partial (   | 263.17  | 1 |
| Unknown                                                                              | 25.14   | 1 |
| Unknown                                                                              | 379.12  | 1 |
| Unknown                                                                              | 22.09   | 1 |
| tc Rep: T1K7.26 protein - Arabidopsis thaliana (Mouse-ear cress), partial (17%) [TC4 | 1157.25 | 1 |
| gb AM819928 seedling library, SL Nicotiana tabacum cDNA clone nt002008041, mF        | 19.62   | 1 |
| tc Rep: Cystathionine gamma-synthase isoform 2 - Solanum tuberosum (Potato), p:      | 1061.9  | 1 |
| Unknown                                                                              | 86.97   | 1 |
| tc Rep: RAD23-like - Solanum tuberosum (Potato), complete [TC48167]                  | 59.1    | 1 |
| gb KT7C.112H03F.051221T7 KT7 Nicotiana tabacum cDNA clone KT7C.112H03, mRl           | 184.15  | 1 |
| tc Rep: Eukaryotic initiation factor iso4E - Nicotiana tabacum (Common tobacco), p   | 1299.05 | 1 |
| Unknown                                                                              | 209.56  | 1 |
| gb KP1B.108L06F.050726T7 KP1B Nicotiana tabacum cDNA clone KP1B.108L06, mF           | 29.4    | 1 |
| gb AGN_RNC029xp09f1.ab1 AGN_RNC Nicotiana tabacum cDNA 5', mRNA sequenc              | 40.13   | 1 |
| tc Rep: Chromosome chr9 scaffold_7, whole genome shotgun sequence - Vitis vinif      | 48.97   | 1 |
| Unknown                                                                              | 21.52   | 1 |
| Unknown                                                                              | 20.19   | 1 |
| gb KP1B.111C19F.060116T7 KP1B Nicotiana tabacum cDNA clone KP1B.111C19, ml           | 22.68   | 1 |
| tc Rep: Chromosome undetermined scaffold_984, whole genome shotgun sequenc           | 2624.35 | 1 |
| tc Rep: Chromosome chr16 scaffold_10, whole genome shotgun sequence - Vitis vi       | 153.67  | 1 |
| tc Rep: Chromosome chr6 scaffold_3, whole genome shotgun sequence - Vitis vinif      | 86.75   | 1 |
| gb TT-29_J20 K326 trichome library Nicotiana tabacum cDNA, mRNA sequence [FG         | 131.51  | 1 |
| tc Rep: Chromosome undetermined scaffold_71, whole genome shotgun sequence           | 618.39  | 1 |
| tc Rep: Chromosome chr12 scaffold_18, whole genome shotgun sequence - Vitis vi       | 19.23   | 1 |
| gb Nicotiana tabacum NtNRAMP1 mRNA for metal transporter, complete cds [AB5i         | 30.39   | 1 |
| tc Rep: Chromosome undetermined scaffold_296, whole genome shotgun sequenc           | 33.01   | 1 |
| gb Nicotiana tabacum NtNRAMP1 mRNA for metal transporter, complete cds [AB5i         | 34.26   | 1 |
| Unknown                                                                              | 58.57   | 1 |
| gb AGN_RPC022xi19f1.ab1 AGN_RPC Nicotiana tabacum cDNA 5', mRNA sequence             | 556.4   | 1 |
| tc Rep: CBL-interacting protein kinase 25 - Populus trichocarpa (Western balsam pc   | 1137.94 | 1 |

|                                                                                      |          |   |
|--------------------------------------------------------------------------------------|----------|---|
| gb CHO_SL018xb09f1.ab1 CHO_SL Nicotiana tabacum cDNA, mRNA sequence [EH6             | 108.28   | 1 |
| Unknown                                                                              | 30.78    | 1 |
| Unknown                                                                              | 51301.6  | 1 |
| Unknown                                                                              | 250.26   | 1 |
| gb KL4B.101K06F.051103T7 KL4B Nicotiana tabacum cDNA clone KL4B.101K06, mR           | 519.26   | 1 |
| gb Nicotiana tabacum adc mRNA for arginine decarboxylase, complete cds [AB110        | 3527.65  | 1 |
| tc Rep: H+-transporting two-sector ATPase, C (AC39) subunit - Medicago truncatula    | 3297.93  | 1 |
| tc Rep: Serine hydroxymethyltransferase - Populus tremuloides (Quaking aspen), p     | 14924.95 | 1 |
| Unknown                                                                              | 23.11    | 1 |
| tc Rep: 26S protease regulatory subunit 6A homolog (TAT-binding protein homolog      | 614.91   | 1 |
| gb AGN_RNC024xp05f1.ab1 AGN_RNC Nicotiana tabacum cDNA 5', mRNA sequenc              | 18830.75 | 1 |
| Unknown                                                                              | 89.69    | 1 |
| tc Rep: Chromosome chr2 scaffold_132, whole genome shotgun sequence - Vitis vi       | 74.72    | 1 |
| tc Rep: Ribosomal protein L23 family protein - Solanum tuberosum (Potato), partia    | 86.9     | 1 |
| gb Tobacco mRNA fragment for nitrate reductase [X06134]                              | 25.77    | 1 |
| tc Rep: Predicted protein - Physcomitrella patens subsp. patens, partial (96%) [TC6  | 41.61    | 1 |
| gb KG9B.003J03F.050720T7 KG9B Nicotiana tabacum cDNA clone KG9B.003J03, mF           | 5073.25  | 1 |
| tc Rep: Chromosome chr8 scaffold_106, whole genome shotgun sequence - Vitis vi       | 1505.79  | 1 |
| Unknown                                                                              | 222.27   | 1 |
| gb AGN_RPC003xo05f1.ab1 AGN_RPC Nicotiana tabacum cDNA 5', mRNA sequenc              | 21.04    | 1 |
| tc Rep: Formate--tetrahydrofolate ligase - Spinacia oleracea (Spinach), partial (25% | 487.65   | 1 |
| gb AM784687 seedling library, SL Nicotiana tabacum cDNA clone nt002217060, mF        | 86.67    | 1 |
| gb tbt_009695 Normalized Nicotiana tabacum cDNA library Nicotiana tabacum cDN        | 136.01   | 1 |
| Unknown                                                                              | 22.3     | 1 |
| gb AM830119 seedling library, SL Nicotiana tabacum cDNA clone nt002310054, mF        | 1044.97  | 1 |
| gb KG9B.105M12F.051128T7 KG9B Nicotiana tabacum cDNA clone KG9B.105M12,              | 25.33    | 1 |
| Unknown                                                                              | 24.2     | 1 |
| gb TT-21_M06 K326 late senescent leaf library Nicotiana tabacum cDNA, mRNA seq       | 429.86   | 1 |
| tc Rep: Transcription factor bZIP63 - Glycine max (Soybean), partial (41%) [TC7400   | 891.88   | 1 |
| gb N.tabacum mRNA for pectate lyase [X67159]                                         | 50341    | 1 |
| gb Nicotiana tabacum mRNA for putative putative beta-(1,2)-xylosyltransferase (xy    | 28.92    | 1 |
| gb KP1B.101G10F.050722T7 KP1B Nicotiana tabacum cDNA clone KP1B.101G10, m            | 43.82    | 1 |
| Unknown                                                                              | 28.41    | 1 |
| Unknown                                                                              | 48.94    | 1 |

|                                                                                             |         |   |
|---------------------------------------------------------------------------------------------|---------|---|
| tc Rep: Calcium-binding protein CAST - Solanum tuberosum (Potato), partial (87%)            | 359.14  | 1 |
| tc Rep: Heat shock 70 kDa protein, mitochondrial precursor - Pisum sativum (Garde           | 80.93   | 1 |
| gb KF8C.103M04F.051214T7 KF8 Nicotiana tabacum cDNA clone KF8C.103M04, mF                   | 54.06   | 1 |
| tc Rep: Predicted protein - Physcomitrella patens subsp. patens, partial (96%) [TC64        | 129.74  | 1 |
| tc Rep: Splicing factor-like protein - Vitis riparia (Frost grape) (Vitis vulpina), partial | 70.63   | 1 |
| gb EST_YP003xg02f1.ab1 EST_YP Nicotiana tabacum cDNA, mRNA sequence [EH61                   | 82.49   | 1 |
| Unknown                                                                                     | 165.84  | 1 |
| tc Rep: Chromosome chr19 scaffold_4, whole genome shotgun sequence - Vitis vin              | 142.81  | 1 |
| gb AM824464 DL, diurnal library Nicotiana tabacum cDNA clone nt005080040, mRI               | 59.77   | 1 |
| tc Rep: Chromosome chr11 scaffold_56, whole genome shotgun sequence - Vitis vi              | 75.54   | 1 |
| tc Rep: Chloride channel Stlc1 - Solanum tuberosum (Potato), partial (27%) [TC551           | 607.99  | 1 |
| gb KG9B.107M14F.060120T7 KG9B Nicotiana tabacum cDNA clone KG9B.107M14,                     | 594.23  | 1 |
| gb TT-03_F12 K326 early senescent leaf library Nicotiana tabacum cDNA, mRNA seq             | 426.13  | 1 |
| gb Nicotiana tabacum mRNA for putative 16kDa membrane protein [AJ272037]                    | 47.95   | 1 |
| gb KR2B.109P14F.051229T7 KR2B Nicotiana tabacum cDNA clone KR2B.109P14, mI                  | 1087.5  | 1 |
| gb TT-03_B09 K326 trichome library Nicotiana tabacum cDNA, mRNA sequence [FC                | 459.59  | 1 |
| gb AM803568 COL, cold overnight library Nicotiana tabacum cDNA clone nt006165               | 27.2    | 1 |
| tc Rep: Chromosome chr9 scaffold_7, whole genome shotgun sequence - Vitis vinif             | 32.05   | 1 |
| Unknown                                                                                     | 76.03   | 1 |
| gb TT-21_K15 K326 early senescent leaf library Nicotiana tabacum cDNA, mRNA seq             | 530.21  | 1 |
| Unknown                                                                                     | 786.35  | 1 |
| Unknown                                                                                     | 2816.52 | 1 |
| Unknown                                                                                     | 179.64  | 1 |
| gb KP1B.001I07F.050628T7 KP1B Nicotiana tabacum cDNA clone KP1B.001I07, mRI                 | 249.53  | 1 |
| Unknown                                                                                     | 151.59  | 1 |
| tc Rep: Chromosome undetermined scaffold_310, whole genome shotgun sequenc                  | 24.02   | 1 |
| Unknown                                                                                     | 502.48  | 1 |
| Unknown                                                                                     | 51.06   | 1 |
| tc Rep: Histone H3 - Vitis vinifera (Grape), complete [TC47009]                             | 869.11  | 1 |
| Unknown                                                                                     | 37.4    | 1 |
| tc Rep: Chromosome chr14 scaffold_9, whole genome shotgun sequence - Vitis vin              | 23.71   | 1 |
| gb KG9B.105H20F.051128T7 KG9B Nicotiana tabacum cDNA clone KG9B.105H20, n                   | 283.09  | 1 |
| gb AGN_RNC211x121f1.ab1 AGN_RNC Nicotiana tabacum cDNA 5', mRNA sequenc                     | 4424.67 | 1 |
| tc Rep: Chromosome chr13 scaffold_210, whole genome shotgun sequence - Vitis v              | 564.36  | 1 |

|                                                                                              |          |   |
|----------------------------------------------------------------------------------------------|----------|---|
| Unknown                                                                                      | 123.24   | 1 |
| gb AGN_PNL206af1_g11.trimmed.seq AGN_PNL Nicotiana tabacum cDNA 5', mRNA                     | 25.97    | 1 |
| gb KL4B.102B08F.051125T7 KL4B Nicotiana tabacum cDNA clone KL4B.102B08, mRNA                 | 31.38    | 1 |
| tc Rep: Nucleic acid binding protein - Nicotiana tabacum (Common tobacco), partial           | 1642.32  | 1 |
| tc Rep: Chromosome chr18 scaffold_1, whole genome shotgun sequence - Vitis vinifera          | 141.5    | 1 |
| tc Rep: S-adenosylmethionine synthetase 3 - Solanum lycopersicum (Tomato) (Lycopersicon)     | 50106.4  | 1 |
| gb AGN_RNC012xc03f1.ab1 AGN_RNC Nicotiana tabacum cDNA 5', mRNA sequence                     | 185.77   | 1 |
| gb KN6B.103G02F.060103T7 KN6B Nicotiana tabacum cDNA clone KN6B.103G02, mRNA                 | 8329.68  | 1 |
| Unknown                                                                                      | 181.32   | 1 |
| tc Rep: Chromosome chr6 scaffold_25, whole genome shotgun sequence - Vitis vinifera          | 73.18    | 1 |
| tc Rep: Transport protein particle component Bet3-like protein - Oryza sativa subsp. indica  | 61.13    | 1 |
| gb KG9B.106E05F.051129T7 KG9B Nicotiana tabacum cDNA clone KG9B.106E05, mRNA                 | 208.28   | 1 |
| gb KR3B.105K07F.051109T7 KR3B Nicotiana tabacum cDNA clone KR3B.105K07, mRNA                 | 296.98   | 1 |
| tc Rep: ACS2 - Ricinus communis (Castor bean), partial (22%) [TC54234]                       | 91.61    | 1 |
| tc Rep: Ubiquitin carrier protein - Nicotiana benthamiana, complete [TC69183]                | 17.14    | 1 |
| tc Rep: Serine acetyltransferase 4 - Nicotiana tabacum (Common tobacco), complete            | 490.96   | 1 |
| Unknown                                                                                      | 107.24   | 1 |
| Unknown                                                                                      | 99.72    | 1 |
| tc Rep: Chromosome chr1 scaffold_84, whole genome shotgun sequence - Vitis vinifera          | 72.5     | 1 |
| Unknown                                                                                      | 146.96   | 1 |
| gb AGN_RNC017xp19f1.ab1 AGN_RNC Nicotiana tabacum cDNA 5', mRNA sequence                     | 90.08    | 1 |
| gb Nicotiana tabacum hydroxy-methyl-glutaryl-coenzyme A reductase (HMGR2) mRNA               | 48369.85 | 1 |
| gb Nicotiana tabacum cyclin-dependent kinase B1-2 (CdkB1-2) mRNA, complete cds               | 29.19    | 1 |
| gb TL13.109B21F.060320T7 TL13 Nicotiana tabacum cDNA clone TL13.109B21, mRNA                 | 379.86   | 1 |
| tc Rep: Chromosome chr5 scaffold_58, whole genome shotgun sequence - Vitis vinifera          | 7922.05  | 1 |
| gb Nicotiana tabacum Avr9 [AY220479]                                                         | 224.37   | 1 |
| tc Rep: 40S ribosomal protein S15-like - Solanum tuberosum (Potato), complete [TC100000]     | 234.35   | 1 |
| gb Tobacco (N.tabacum) GapC mRNA encoding cytosolic glyceraldehyde-3-phosphate dehydrogenase | 1174.17  | 1 |
| gb N.tabacum mRNA for aquaporin 1 [Y08161]                                                   | 1018.07  | 1 |
| Unknown                                                                                      | 88.98    | 1 |
| Unknown                                                                                      | 28.18    | 1 |
| tc Rep: U1 snRNP-interacting 70 kDa protein - Triticum aestivum (Wheat), partial (2/3)       | 251.89   | 1 |
| Unknown                                                                                      | 3680.16  | 1 |
| tc Rep: RNA-binding protein RZ-1 - Nicotiana glauca (Wood tobacco), complete [AF010000]      | 635.21   | 1 |

|                                                                                     |          |   |
|-------------------------------------------------------------------------------------|----------|---|
| Unknown                                                                             | 26.68    | 1 |
| tc Rep: Chromosome chr14 scaffold_21, whole genome shotgun sequence - Vitis vi      | 17.43    | 1 |
| Unknown                                                                             | 727.35   | 1 |
| Unknown                                                                             | 61.32    | 1 |
| tc Rep: Chromosome chr6 scaffold_15, whole genome shotgun sequence - Vitis vin      | 27.63    | 1 |
| gb KR2B.105G16F.051227T7 KR2B Nicotiana tabacum cDNA clone KR2B.105G16, m           | 63.15    | 1 |
| tc Rep: Chromosome chr7 scaffold_20, whole genome shotgun sequence - Vitis vin      | 2569.59  | 1 |
| tc Rep: Sulfite oxidase-like - Solanum tuberosum (Potato), partial (71%) [TC47831]  | 2864.09  | 1 |
| tc Rep: Chromosome chr8 scaffold_34, whole genome shotgun sequence - Vitis vin      | 106.85   | 1 |
| gb KT7B.114M24F.060127T7 KT7 Nicotiana tabacum cDNA clone KT7B.114M24, m            | 40       | 1 |
| gb TT-36_P15 Samsun trichome library Nicotiana tabacum cDNA, mRNA sequence          | 10214.55 | 1 |
| gb KR3B.107K07F.051110T7 KR3B Nicotiana tabacum cDNA clone KR3B.107K07, m           | 66.88    | 1 |
| tc Rep: Impa2 - Nicotiana benthamiana, partial (98%) [TC72049]                      | 3056.52  | 1 |
| Unknown                                                                             | 22.06    | 1 |
| tc Rep: Chromosome chr5 scaffold_72, whole genome shotgun sequence - Vitis vin      | 168.33   | 1 |
| gb AM845812 seedling library, SL Nicotiana tabacum cDNA clone nt002002037, m        | 120.24   | 1 |
| tc Rep: Chromosome chr19 scaffold_66, whole genome shotgun sequence - Vitis vi      | 59.02    | 1 |
| Unknown                                                                             | 28.47    | 1 |
| Unknown                                                                             | 78.81    | 1 |
| Unknown                                                                             | 93.68    | 1 |
| gb AGN_ELP023xo22f1.ab1 AGN_ELP Nicotiana tabacum cDNA 5', mRNA sequence            | 77.19    | 1 |
| gb AGN_ELP018xj16f1.ab1 AGN_ELP Nicotiana tabacum cDNA 5', mRNA sequence            | 2209.87  | 1 |
| gb CHO_SL002xn01f1.ab1 CHO_SL Nicotiana tabacum cDNA, mRNA sequence [EH6            | 6493.57  | 1 |
| Unknown                                                                             | 421.09   | 1 |
| Unknown                                                                             | 177.95   | 1 |
| gb TT-01_F11 K326 trichome library Nicotiana tabacum cDNA, mRNA sequence [FG        | 39.08    | 1 |
| gb tbt_010968 Normalized Nicotiana tabacum cDNA library Nicotiana tabacum cDN       | 15870.95 | 1 |
| gb KL5B.115L21F.060217T7 KL5B Nicotiana tabacum cDNA clone KL5B.115L21, mR          | 386.53   | 1 |
| gb KL5B.106E03F.060215T7 KL5B Nicotiana tabacum cDNA clone KL5B.106E03, mR          | 1075.21  | 1 |
| gb KL4B.103K02F.051103T7 KL4B Nicotiana tabacum cDNA clone KL4B.103K02, mR          | 842.21   | 1 |
| Unknown                                                                             | 20.02    | 1 |
| tc Rep: Digalactosyldiacylglycerol synthase 2, chloroplast - Glycine max (Soybean), | 10202.06 | 1 |
| gb CHO_SL017xp04f1.ab1 CHO_SL Nicotiana tabacum cDNA, mRNA sequence [EH6            | 57.07    | 1 |
| tc Rep: Chromosome chr11 scaffold_13, whole genome shotgun sequence - Vitis vi      | 131.62   | 1 |

|                                                                                      |         |   |
|--------------------------------------------------------------------------------------|---------|---|
| gb N.tabacum cDNA for glutamine synthetase (3' region) [X68604]                      | 1473.21 | 1 |
| Unknown                                                                              | 85.65   | 1 |
| gb KP1B.001B19F.050628T7 KP1B Nicotiana tabacum cDNA clone KP1B.001B19, mR           | 26.5    | 1 |
| tc Rep: Chromosome chr14 scaffold_27, whole genome shotgun sequence - Vitis vi       | 1491.75 | 1 |
| tc Rep: Chromosome chr15 scaffold_37, whole genome shotgun sequence - Vitis vi       | 259.65  | 1 |
| Unknown                                                                              | 276.54  | 1 |
| Unknown                                                                              | 269.08  | 1 |
| tc Rep: Chromosome undetermined scaffold_69, whole genome shotgun sequence           | 352.5   | 1 |
| gb KN6B.101B19F.051230T7 KN6B Nicotiana tabacum cDNA clone KN6B.101B19, mR           | 25.57   | 1 |
| tc Rep: Chromosome chr17 scaffold_12, whole genome shotgun sequence - Vitis vi       | 601.01  | 1 |
| Unknown                                                                              | 1121.29 | 1 |
| tc Rep: Endo-1,4-beta-glucanase - Solanum lycopersicum (Tomato) (Lycopersicon e      | 93.17   | 1 |
| gb KG9B.001H19F.050628T7 KG9B Nicotiana tabacum cDNA clone KG9B.001H19, n            | 925.36  | 1 |
| gb KL4B.100C13F.050922T7 KL4B Nicotiana tabacum cDNA clone KL4B.100C13, mR           | 143.07  | 1 |
| gb TOBESTR060C10 TOBEST cDNA library 1 Nicotiana tabacum cDNA 5', mRNA seq           | 70.6    | 1 |
| tc Rep: Chromosome chr9 scaffold_7, whole genome shotgun sequence - Vitis vinif      | 155.82  | 1 |
| tc Rep: Chromosome chr13 scaffold_17, whole genome shotgun sequence - Vitis vi       | 165.48  | 1 |
| gb KR2B.104F07F.051227T7 KR2B Nicotiana tabacum cDNA clone KR2B.104F07, mR           | 80.67   | 1 |
| tc Rep: Peptidyl-prolyl cis-trans isomerase - Solanum lycopersicum (Tomato) (Lycop   | 296.69  | 1 |
| tc Rep: RNA binding protein - Nicotiana sylvestris (Wood tobacco), complete [TC44    | 54.18   | 1 |
| Unknown                                                                              | 255.04  | 1 |
| gb KP1B.101J23F.050722T7 KP1B Nicotiana tabacum cDNA clone KP1B.101J23, mR           | 255.64  | 1 |
| tc Rep: Os05g0227700 protein - Oryza sativa subsp. japonica (Rice), partial (32%) [T | 207.03  | 1 |
| Unknown                                                                              | 151.93  | 1 |
| gb FS388031 normalized full-length tobacco cDNA library Nicotiana tabacum cDNA       | 521.18  | 1 |
| Unknown                                                                              | 64.76   | 1 |
| gb KG9B.106A17F.051129T7 KG9B Nicotiana tabacum cDNA clone KG9B.106A17, n            | 525.5   | 1 |
| tc Rep: Inorganic pyrophosphatase - Nicotiana tabacum (Common tobacco), compl        | 265.65  | 1 |
| tc Rep: Chromosome chr1 scaffold_46, whole genome shotgun sequence - Vitis vin       | 130.44  | 1 |
| tc Rep: Brain protein 44-like - Zea mays (Maize), partial (89%) [TC53445]            | 1918.09 | 1 |
| tc Rep: Regulatory protein, TetR:Tetracyclin repressor, C-terminal - Enterococcus fa | 77.5    | 1 |
| gb TT-09_B21 Samsun trichome library Nicotiana tabacum cDNA, mRNA sequence           | 88.12   | 1 |
| tc Rep: Chromosome chr2 scaffold_187, whole genome shotgun sequence - Vitis vi       | 49.41   | 1 |
| gb AGN_RPC010x18f1.ab1 AGN_RPC Nicotiana tabacum cDNA 5', mRNA sequence              | 71.6    | 1 |



|                                                                                       |          |   |
|---------------------------------------------------------------------------------------|----------|---|
| gb TT-02_K13 Samsun trichome library Nicotiana tabacum cDNA, mRNA sequence            | 27.14    | 1 |
| tc Rep: Chloroplast photosystem I reaction center V - Camellia sinensis (Tea), partia | 18.96    | 1 |
| tc Rep: Chromosome chr19 scaffold_4, whole genome shotgun sequence - Vitis vin        | 380.83   | 1 |
| tc Rep: Elongation factor 1-alpha - Nicotiana paniculata, partial (23%) [TC64911]     | 3603.4   | 1 |
| Unknown                                                                               | 71.29    | 1 |
| tc CHEVIARRN E.virginiana plastid ribosomal RNA operon, trnI and trnA pseudogen       | 231.53   | 1 |
| gb Nicotiana tabacum mRNA for putative alpha7 proteasome subunit (a7 gene) [AJ        | 23.01    | 1 |
| Unknown                                                                               | 21.88    | 1 |
| gb AGN_RPC007xp13f1.ab1 AGN_RPC Nicotiana tabacum cDNA 5', mRNA sequenc               | 19.49    | 1 |
| Unknown                                                                               | 19.65    | 1 |
| tc Rep: Chromosome chr4 scaffold_6, whole genome shotgun sequence - Vitis vinif       | 11122.25 | 1 |
| tc Rep: Hypersensitive-induced reaction protein - Capsicum annuum (Bell pepper),      | 833.23   | 1 |
| Unknown                                                                               | 116.64   | 1 |
| gb KP1B.108N20F.050726T7 KP1B Nicotiana tabacum cDNA clone KP1B.108N20, m             | 36.04    | 1 |
| gb Nicotiana tabacum mRNA for hsr203J, complete cds [AB091430]                        | 43.14    | 1 |
| tc Rep: Methionine aminopeptidase - Vitis vinifera (Grape), partial (92%) [TC51281]   | 34.58    | 1 |
| Unknown                                                                               | 140.21   | 1 |
| gb AGN_RNC025xo07f1.ab1 AGN_RNC Nicotiana tabacum cDNA 5', mRNA sequenc               | 74.59    | 1 |
| gb AGN_RNC017xo13f1.ab1 AGN_RNC Nicotiana tabacum cDNA 5', mRNA sequenc               | 50.4     | 1 |
| Unknown                                                                               | 54.98    | 1 |
| gb Nicotiana tabacum mRNA for malate dehydrogenase (md1 gene) [AJ299256]              | 111.79   | 1 |
| tc Rep: Late embryogenesis abundant protein 5 - Nicotiana tabacum (Common tobac       | 18585.7  | 1 |
| Unknown                                                                               | 36.95    | 1 |
| gb KG9B.102C13F.051126T7 KG9B Nicotiana tabacum cDNA clone KG9B.102C13, r             | 8894.49  | 1 |
| Unknown                                                                               | 2004.87  | 1 |
| tc Rep: Chromosome chr6 scaffold_3, whole genome shotgun sequence - Vitis vinif       | 1078.14  | 1 |
| tc Rep: Chromosome chr14 scaffold_27, whole genome shotgun sequence - Vitis vi        | 86.07    | 1 |
| Unknown                                                                               | 55.03    | 1 |
| gb KG9B.105O22F.051128T7 KG9B Nicotiana tabacum cDNA clone KG9B.105O22, r             | 3280.16  | 1 |
| gb CHO_SL018xo19f1.ab1 CHO_SL Nicotiana tabacum cDNA, mRNA sequence [EH6              | 395.28   | 1 |
| gb KP1B.103C08F.050725T7 KP1B Nicotiana tabacum cDNA clone KP1B.103C08, mI            | 72.44    | 1 |
| gb KG9B.105L09F.051128T7 KG9B Nicotiana tabacum cDNA clone KG9B.105L09, m             | 429.21   | 1 |
| gb CHO_SL025xf23f1.ab1 CHO_SL Nicotiana tabacum cDNA, mRNA sequence [EH6              | 31.48    | 1 |
| tc Rep: Chromosome chr5 scaffold_64, whole genome shotgun sequence - Vitis vin        | 508.39   | 1 |

|                                                                                       |         |   |
|---------------------------------------------------------------------------------------|---------|---|
| gb CHO_SL024xm08f1.ab1 CHO_SL Nicotiana tabacum cDNA, mRNA sequence [EH6              | 137.64  | 1 |
| gb KL4B.105L07F.051104T7 KL4B Nicotiana tabacum cDNA clone KL4B.105L07, mR            | 21.57   | 1 |
| tc Rep: AT3g06540/F5E6_13 - Arabidopsis thaliana (Mouse-ear cress), partial (8%)      | 1211.89 | 1 |
| gb KL4B.113H18F.060131T7 KL4B Nicotiana tabacum cDNA clone KL4B.113H18, mF            | 51.63   | 1 |
| gb TT-47_P04 Burley21 trichome library Nicotiana tabacum cDNA, mRNA sequence          | 1317.3  | 1 |
| tc Rep: Avr9/Cf-9 rapidly elicited protein 284 - Nicotiana tabacum (Common tobacc     | 1298.45 | 1 |
| gb AGN_RPC024xa10f1.ab1 AGN_RPC Nicotiana tabacum cDNA 5', mRNA sequenc               | 23.78   | 1 |
| gb KL4B.103G04F.051103T7 KL4B Nicotiana tabacum cDNA clone KL4B.103G04, mF            | 89.93   | 1 |
| gb KG9B.001E12F.050628T7 KG9B Nicotiana tabacum cDNA clone KG9B.001E12, m             | 23.28   | 1 |
| Unknown                                                                               | 20.9    | 1 |
| tc Rep: Chromosome chr19 scaffold_4, whole genome shotgun sequence - Vitis vin        | 48.8    | 1 |
| gb KL5B.001F15F.050901T7 KL5B Nicotiana tabacum cDNA clone KL5B.001F15, mR            | 2962.4  | 1 |
| tc Rep: Chromosome chr7 scaffold_20, whole genome shotgun sequence - Vitis vin        | 22.63   | 1 |
| gb TT-29_K04 Samsun trichome library Nicotiana tabacum cDNA, mRNA sequence            | 150.3   | 1 |
| Unknown                                                                               | 20.89   | 1 |
| tc Rep: Ubiquitin carboxyl-terminal hydrolase - Vitis vinifera (Grape), partial (31%) | 63.52   | 1 |
| gb KG9B.104F17F.060120T7 KG9B Nicotiana tabacum cDNA clone KG9B.104F17, m             | 1013    | 1 |
| tc Rep: RSH2 - Nicotiana tabacum (Common tobacco), partial (35%) [TC57269]            | 2856.5  | 1 |
| gb CHO_SL019xk08f1.ab1 CHO_SL Nicotiana tabacum cDNA, mRNA sequence [EH6              | 441.97  | 1 |
| tc Rep: Endonuclease/Exonuclease/phosphatase family protein, expressed - Oryza :      | 58.4    | 1 |
| Unknown                                                                               | 35.1    | 1 |
| tc Rep: Chromosome chr1 scaffold_166, whole genome shotgun sequence - Vitis vi        | 111.94  | 1 |
| tc Rep: ATP synthase subunit a - Nicotiana tabacum (Common tobacco), complete         | 142.55  | 1 |
| tc Rep: Heat shock protein 90 - Nicotiana tabacum (Common tobacco), partial (29%      | 69.51   | 1 |
| gb KG9B.102L14F.051126T7 KG9B Nicotiana tabacum cDNA clone KG9B.102L14, m             | 85.84   | 1 |
| tc Rep: Lipoprotein signal peptidase - Bradyrhizobium japonicum, partial (9%) [TC6    | 147.29  | 1 |
| Unknown                                                                               | 119.17  | 1 |
| tc Rep: Chromosome undetermined scaffold_235, whole genome shotgun sequenc            | 24.16   | 1 |
| tc Rep: Chromosome chr4 scaffold_83, whole genome shotgun sequence - Vitis vin        | 558.09  | 1 |
| gb KR2B.103A09F.051227T7 KR2B Nicotiana tabacum cDNA clone KR2B.103A09, m             | 567.6   | 1 |
| Unknown                                                                               | 123.18  | 1 |
| tc Rep: Glycine dehydrogenase [decarboxylating], mitochondrial precursor - Solanu     | 2949.05 | 1 |
| Unknown                                                                               | 77.01   | 1 |
| gb KF8C.102D20F.051214T7 KF8 Nicotiana tabacum cDNA clone KF8C.102D20, mR             | 644.18  | 1 |

|                                                                                     |          |   |
|-------------------------------------------------------------------------------------|----------|---|
| Unknown                                                                             | 355.32   | 1 |
| Unknown                                                                             | 172.26   | 1 |
| tc Rep: Chromosome undetermined scaffold_203, whole genome shotgun sequenc          | 10258.25 | 1 |
| gb Nicotiana tabacum cultivar Havana SR1 cytosine-5-methyltransferase (MET1) m      | 32.47    | 1 |
| tc Rep: Chromosome chr18 scaffold_1, whole genome shotgun sequence - Vitis vin      | 84.84    | 1 |
| Unknown                                                                             | 82.58    | 1 |
| Unknown                                                                             | 29.94    | 1 |
| tc Rep: G/HBF-1 - Glycine max (Soybean), partial (68%) [TC41471]                    | 495.22   | 1 |
| Unknown                                                                             | 106.4    | 1 |
| Unknown                                                                             | 632.37   | 1 |
| tc Rep: ASC1-like protein - Solanum lycopersicum (Tomato) (Lycopersicon esculent    | 436.42   | 1 |
| gb AGN_RPC008xi04f1.ab1 AGN_RPC Nicotiana tabacum cDNA 5', mRNA sequence            | 38.39    | 1 |
| tc Rep: F18O14.8 - Arabidopsis thaliana (Mouse-ear cress), partial (90%) [TC46547]  | 528.15   | 1 |
| gb KG9B.004E04F.050721T7 KG9B Nicotiana tabacum cDNA clone KG9B.004E04, m           | 57.95    | 1 |
| Unknown                                                                             | 157.14   | 1 |
| Unknown                                                                             | 575.95   | 1 |
| tc Rep: Chromosome chr1 scaffold_5, whole genome shotgun sequence - Vitis vinif     | 72.03    | 1 |
| gb AGN_RNC003xh03f1.ab1 AGN_RNC Nicotiana tabacum cDNA 5', mRNA sequenc             | 38       | 1 |
| gb KL4B.106F05F.051125T7 KL4B Nicotiana tabacum cDNA clone KL4B.106F05, mR          | 750.99   | 1 |
| Unknown                                                                             | 5697     | 1 |
| gb KR3B.108M02F.051110T7 KR3B Nicotiana tabacum cDNA clone KR3B.108M02, r           | 28.88    | 1 |
| tc Rep: Chromosome chr7 scaffold_44, whole genome shotgun sequence - Vitis vin      | 134.62   | 1 |
| tc Rep: Chromosome chr9 scaffold_49, whole genome shotgun sequence - Vitis vin      | 985.76   | 1 |
| Unknown                                                                             | 108.81   | 1 |
| gb KP1B.104M15F.050725T7 KP1B Nicotiana tabacum cDNA clone KP1B.104M15, r           | 551.68   | 1 |
| Unknown                                                                             | 520.62   | 1 |
| Unknown                                                                             | 1360.88  | 1 |
| tc Rep: Enhanced disease susceptibility 5 - Arabidopsis thaliana (Mouse-ear cress), | 37.21    | 1 |
| gb TL13.108B10F.060315T7 TL13 Nicotiana tabacum cDNA clone TL13.108B10, mRl         | 179.95   | 1 |
| gb KR3B.110K10F.051111T7 KR3B Nicotiana tabacum cDNA clone KR3B.110K10, ml          | 102.2    | 1 |
| Unknown                                                                             | 40.17    | 1 |
| gb KT7C.105E05F.051219T7 KT7 Nicotiana tabacum cDNA clone KT7C.105E05, mRN          | 35.13    | 1 |
| gb AGN_RNC003xe06f1.ab1 AGN_RNC Nicotiana tabacum cDNA 5', mRNA sequenc             | 57.47    | 1 |
| gb KF8C.102P17F.051214T7 KF8 Nicotiana tabacum cDNA clone KF8C.102P17, mRN          | 9897.97  | 1 |

|                                                                                                |         |   |
|------------------------------------------------------------------------------------------------|---------|---|
| gb TT-23_E11 Burley21 trichome library <i>Nicotiana tabacum</i> cDNA, mRNA sequence            | 51.69   | 1 |
| gb BP134667 MAT001 <i>Nicotiana tabacum</i> cDNA clone BY7087, mRNA sequence [BF               | 80.03   | 1 |
| gb KG9B.001K19F.050628T7 KG9B <i>Nicotiana tabacum</i> cDNA clone KG9B.001K19, m               | 262.96  | 1 |
| Unknown                                                                                        | 115.09  | 1 |
| tc Rep: 1-acyl-sn-glycerol-3-phosphate acyltransferase - <i>Prunus dulcis</i> (Almond) (Pr     | 3256.92 | 1 |
| tc Rep: Sodium/hydrogen exchanger - <i>Solanum lycopersicum</i> (Tomato) ( <i>Lycopersici</i>  | 432.73  | 1 |
| gb AGN_RNC127xb08f1.ab1 AGN_RNC <i>Nicotiana tabacum</i> cDNA 5', mRNA sequenc                 | 51.04   | 1 |
| Unknown                                                                                        | 816.29  | 1 |
| gb TT-11_H14 K326 early senescent leaf library <i>Nicotiana tabacum</i> cDNA, mRNA se          | 1185.07 | 1 |
| Unknown                                                                                        | 3551.59 | 1 |
| gb TT-28_J08 K326 trichome library <i>Nicotiana tabacum</i> cDNA, mRNA sequence [FG            | 20.73   | 1 |
| gb KF8C.102M21F.051214T7 KF8 <i>Nicotiana tabacum</i> cDNA clone KF8C.102M21, mF               | 19094.7 | 1 |
| Unknown                                                                                        | 257.93  | 1 |
| Unknown                                                                                        | 104.48  | 1 |
| Unknown                                                                                        | 144.32  | 1 |
| gb AGN_RNC023xe14f1.ab1 AGN_RNC <i>Nicotiana tabacum</i> cDNA 5', mRNA sequenc                 | 84.02   | 1 |
| gb TT-07_I07 Burley21 trichome library <i>Nicotiana tabacum</i> cDNA, mRNA sequence            | 1053.72 | 1 |
| Unknown                                                                                        | 533.94  | 1 |
| tc Rep: Photosystem II P680 chlorophyll A apoprotein - <i>Solanum lycopersicum</i> (Ton        | 67.13   | 1 |
| Unknown                                                                                        | 31.62   | 1 |
| gb KG9B.002E04F.050720T7 KG9B <i>Nicotiana tabacum</i> cDNA clone KG9B.002E04, m               | 518.73  | 1 |
| gb  <i>Nicotiana tabacum</i> pectin methylesterase (PPME1) mRNA, complete cds [AY772           | 89600.8 | 1 |
| tc Rep: Chromosome chr1 scaffold_75, whole genome shotgun sequence - <i>Vitis vin</i>          | 1495.9  | 1 |
| gb  <i>Nicotiana tabacum</i> D31 mRNA for 14-3-3 protein, complete cds [AB071967]              | 39100.1 | 1 |
| gb FS416927 normalized full-length tobacco cDNA library <i>Nicotiana tabacum</i> cDNA          | 1225    | 1 |
| Unknown                                                                                        | 50.84   | 1 |
| gb N. <i>tabacum</i> mRNA for ribonucleotide reductase, clone R1-2 [Y10862]                    | 19.24   | 1 |
| tc Rep: Chromosome chr13 scaffold_210, whole genome shotgun sequence - <i>Vitis v</i>          | 442.66  | 1 |
| tc Rep: Chromosome undetermined scaffold_147, whole genome shotgun sequenc                     | 107.47  | 1 |
| gb AGN_PNL230df1_g11.trimmed.seq AGN_PNL <i>Nicotiana tabacum</i> cDNA 5', mRN,                | 351.82  | 1 |
| tc Rep: Chromosome chr7 scaffold_20, whole genome shotgun sequence - <i>Vitis vin</i>          | 811.66  | 1 |
| tc Rep: Ubiquitin conjugating enzyme 2 - <i>Solanum lycopersicum</i> (Tomato) ( <i>Lycoper</i> | 626.78  | 1 |
| tc Rep: 60S ribosomal protein L19-like protein - <i>Solanum tuberosum</i> (Potato), parti      | 219.4   | 1 |
| tc Rep: Calmodulin binding heat shock protein - <i>Gossypium hirsutum</i> (Upland cotto        | 24.36   | 1 |

|                                                                                    |         |   |
|------------------------------------------------------------------------------------|---------|---|
| tc Rep: Chromosome chr15 scaffold_40, whole genome shotgun sequence - Vitis vi     | 89.83   | 1 |
| gb KG9B.001E17F.050628T7 KG9B Nicotiana tabacum cDNA clone KG9B.001E17, m          | 1867.47 | 1 |
| gb KL4B.110F15F.051106T7 KL4B Nicotiana tabacum cDNA clone KL4B.110F15, mR         | 93.84   | 1 |
| Unknown                                                                            | 4898.63 | 1 |
| gb KF8C.106A11F.051215T7 KF8 Nicotiana tabacum cDNA clone KF8C.106A11, mRN         | 1344.4  | 1 |
| gb Nicotiana tabacum cig3 mRNA, complete cds [AB041352]                            | 2778.45 | 1 |
| tc Rep: Chromosome chr8 scaffold_29, whole genome shotgun sequence - Vitis vin     | 104.99  | 1 |
| tc Rep: Chromosome undetermined scaffold_80, whole genome shotgun sequence         | 270.31  | 1 |
| tc Rep: Chromosome chr5 scaffold_64, whole genome shotgun sequence - Vitis vin     | 218.14  | 1 |
| gb AGN_RPC024xk11f1.ab1 AGN_RPC Nicotiana tabacum cDNA 5', mRNA sequence           | 135.31  | 1 |
| tc Rep: Chromosome chr5 scaffold_64, whole genome shotgun sequence - Vitis vin     | 19.66   | 1 |
| gb KL4B.103K19F.051103T7 KL4B Nicotiana tabacum cDNA clone KL4B.103K19, mR         | 81.11   | 1 |
| tc Rep: High mobility group protein 2 HMG2 - Ipomoea nil (Japanese morning glory   | 7725.68 | 1 |
| gb TT-04_H17 K326 early senescent leaf library Nicotiana tabacum cDNA, mRNA se     | 109.09  | 1 |
| gb AGN_PNL201br1_c10.trimmed.seq AGN_PNL Nicotiana tabacum cDNA 3', mRN,           | 109.24  | 1 |
| Unknown                                                                            | 29.37   | 1 |
| tc Rep: Urease accessory protein G - Solanum tuberosum (Potato), partial (94%) [T  | 61.42   | 1 |
| gb KL4B.103J08F.051103T7 KL4B Nicotiana tabacum cDNA clone KL4B.103J08, mRN        | 115.08  | 1 |
| gb KP1B.104L22F.050725T7 KP1B Nicotiana tabacum cDNA clone KP1B.104L22, mR         | 651.28  | 1 |
| gb KP1B.107M11F.050726T7 KP1B Nicotiana tabacum cDNA clone KP1B.107M11, r          | 212.8   | 1 |
| Unknown                                                                            | 67.92   | 1 |
| gb KN6B.100P17F.051019T7 KN6B Nicotiana tabacum cDNA clone KN6B.100P17, r          | 166.28  | 1 |
| tc Rep: Ras-related GTP-binding protein - Nicotiana tabacum (Common tobacco), c    | 8183.04 | 1 |
| Unknown                                                                            | 416.77  | 1 |
| tc Rep: Genomic DNA, chromosome 5, TAC clone:K17O22 - Arabidopsis thaliana (M      | 391.85  | 1 |
| gb AM819186 DL, diurnal library Nicotiana tabacum cDNA clone nt005051041, mRI      | 55.79   | 1 |
| gb KR3B.103O03F.051108T7 KR3B Nicotiana tabacum cDNA clone KR3B.103O03, r          | 37.79   | 1 |
| gb AGN_PNL219dr1_e8.trimmed.seq AGN_PNL Nicotiana tabacum cDNA 3', mRNA            | 29.76   | 1 |
| gb KP1B.107H01F.050726T7 KP1B Nicotiana tabacum cDNA clone KP1B.107H01, m          | 110.13  | 1 |
| Unknown                                                                            | 486.37  | 1 |
| Unknown                                                                            | 147.54  | 1 |
| tc Rep: Dehydroquinate dehydratase/shikimate dehydrogenase precursor - Nicotia     | 683.21  | 1 |
| gb CHO_SL009xa08f1.ab1 CHO_SL Nicotiana tabacum cDNA, mRNA sequence [EH6           | 271.1   | 1 |
| tc Rep: Oxysterol-binding protein - Solanum tuberosum (Potato), partial (47%) [TC5 | 172.89  | 1 |

|                                                                                                |         |   |
|------------------------------------------------------------------------------------------------|---------|---|
| tc Rep: Chromosome chr17 scaffold_101, whole genome shotgun sequence - Vitis vinifera          | 42.29   | 1 |
| Unknown                                                                                        | 18.96   | 1 |
| tc Rep: DNA-binding protein phosphatase 2C - Nicotiana tabacum (Common tobacco)                | 38.83   | 1 |
| tc Rep: 60S ribosomal protein L41 - Homo sapiens (Human), complete [TC69557]                   | 224.68  | 1 |
| Unknown                                                                                        | 515.66  | 1 |
| gb KR2B.102N04F.051227T7 KR2B Nicotiana tabacum cDNA clone KR2B.102N04, mRNA sequence          | 20.78   | 1 |
| gb AM840689 seedling library, SL Nicotiana tabacum cDNA clone nt002001079, mRNA sequence       | 31.18   | 1 |
| tc Rep: Chromosome chr8 scaffold_29, whole genome shotgun sequence - Vitis vinifera            | 3005.38 | 1 |
| Unknown                                                                                        | 67.15   | 1 |
| Unknown                                                                                        | 948.98  | 1 |
| tc Rep: Chromosome chr17 scaffold_101, whole genome shotgun sequence - Vitis vinifera          | 29.25   | 1 |
| Unknown                                                                                        | 143.77  | 1 |
| tc Rep: Chromosome undetermined SCAF8942, whole genome shotgun sequence - Vitis vinifera       | 436.75  | 1 |
| Unknown                                                                                        | 70.92   | 1 |
| Unknown                                                                                        | 63.45   | 1 |
| gb KR3B.101H09F.051107T7 KR3B Nicotiana tabacum cDNA clone KR3B.101H09, mRNA sequence          | 25.87   | 1 |
| gb KG9B.106D20F.051129T7 KG9B Nicotiana tabacum cDNA clone KG9B.106D20, mRNA sequence          | 26.15   | 1 |
| gb KN6B.115K16F.060127T7 KN6B Nicotiana tabacum cDNA clone KN6B.115K16, mRNA sequence          | 2697.26 | 1 |
| tc Rep: Probable transcriptional regulator - Pseudomonas aeruginosa (strain PA7), complete cds | 84.77   | 1 |
| Unknown                                                                                        | 51.37   | 1 |
| gb TT-07_I07 Burley21 trichome library Nicotiana tabacum cDNA, mRNA sequence                   | 1236.43 | 1 |
| tc Rep: NtEIG-E80 protein - Nicotiana tabacum (Common tobacco), complete [TC68888]             | 57366.1 | 1 |
| tc Rep: Induced stolon tip protein - Capsicum annuum (Bell pepper), partial (66%) [AF042000]   | 7542.56 | 1 |
| tc Rep: Chromosome chr6 scaffold_3, whole genome shotgun sequence - Vitis vinifera             | 225.05  | 1 |
| tc Rep: Os01g0945800 protein - Oryza sativa subsp. japonica (Rice), partial (75%) [T085000]    | 324.19  | 1 |
| gb KP1B.107L14F.050726T7 KP1B Nicotiana tabacum cDNA clone KP1B.107L14, mRNA sequence          | 22.23   | 1 |
| tc Rep: Chromosome chr9 scaffold_7, whole genome shotgun sequence - Vitis vinifera             | 124.03  | 1 |
| tc Rep: Chromosome chr13 scaffold_45, whole genome shotgun sequence - Vitis vinifera           | 35.56   | 1 |
| tc Rep: DnaJ-like protein - Solanum lycopersicum (Tomato) (Lycopersicon esculentum)            | 4715.85 | 1 |
| gb Nicotiana tabacum NIM1-like protein 1 (NML1) mRNA, complete cds [AY640382]                  | 162.34  | 1 |
| gb AGN_RPC022x10f1.ab1 AGN_RPC Nicotiana tabacum cDNA 5', mRNA sequence                        | 50.16   | 1 |
| tc Rep: GDA2 protein - Pisum sativum (Garden pea), partial (70%) [TC48476]                     | 29.89   | 1 |
| gb AGN_RNC105xi20f1.ab1 AGN_RNC Nicotiana tabacum cDNA 5', mRNA sequence                       | 34.69   | 1 |
| tc Rep: Induced stolon tip protein - Capsicum annuum (Bell pepper), partial (66%) [AF042000]   | 3173.16 | 1 |

|                                                                                      |         |   |
|--------------------------------------------------------------------------------------|---------|---|
| Unknown                                                                              | 2669.84 | 1 |
| tc Rep: B-type cyclin - Nicotiana tabacum (Common tobacco), partial (24%) [TC660!    | 46.64   | 1 |
| gb KG9B.002H24F.050720T7 KG9B Nicotiana tabacum cDNA clone KG9B.002H24, n            | 18.03   | 1 |
| gb AGN_RNC105xe02f1.ab1 AGN_RNC Nicotiana tabacum cDNA 5', mRNA sequenc              | 2804.73 | 1 |
| gb KP1B.110A01F.050727T7 KP1B Nicotiana tabacum cDNA clone KP1B.110A01, m            | 47.03   | 1 |
| Unknown                                                                              | 31.98   | 1 |
| gb KN6B.105G10F.060104T7 KN6B Nicotiana tabacum cDNA clone KN6B.105G10, n            | 76.75   | 1 |
| gb Nicotiana tabacum cDNA-AFLP-fragment BSTT31-540, cultivar Bright Yellow 2 [A      | 71.22   | 1 |
| Unknown                                                                              | 19.15   | 1 |
| Unknown                                                                              | 92.81   | 1 |
| Unknown                                                                              | 182.28  | 1 |
| tc Rep: SGT1-2 - Solanum lycopersicum (Tomato) (Lycopersicon esculentum), parti      | 97.15   | 1 |
| gb Nicotiana tabacum ankyrin-repeat protein HBP1 mRNA, complete cds [AF35279         | 540.04  | 1 |
| gb EST_FLW004xb16f1.ab1 EST_FLW Nicotiana tabacum cDNA, mRNA sequence [Ei            | 118.06  | 1 |
| Unknown                                                                              | 27.74   | 1 |
| gb AGN_RPC012xj12f1.ab1 AGN_RPC Nicotiana tabacum cDNA 5', mRNA sequence             | 26.11   | 1 |
| gb Nicotiana tabacum mRNA for putative esterase (T36 gene) [AM851012]                | 22.94   | 1 |
| gb KP1B.001L15F.050628T7 KP1B Nicotiana tabacum cDNA clone KP1B.001L15, mF           | 253.72  | 1 |
| gb TT-30_P14 Burley21 trichome library Nicotiana tabacum cDNA, mRNA sequence         | 99.72   | 1 |
| tc Rep: Chromosome chr18 scaffold_1, whole genome shotgun sequence - Vitis vin       | 489.41  | 1 |
| gb AM839155 COL, cold overnight library Nicotiana tabacum cDNA clone nt006221        | 78.58   | 1 |
| gb KF8C.101M05F.051214T7 KF8 Nicotiana tabacum cDNA clone KF8C.101M05, mF            | 517.51  | 1 |
| tc Rep: Chromosome chr3 scaffold_199, whole genome shotgun sequence - Vitis vi       | 247.54  | 1 |
| Unknown                                                                              | 180.21  | 1 |
| gb CHO_SL002xi14f1.ab1 CHO_SL Nicotiana tabacum cDNA, mRNA sequence [EH62            | 821.82  | 1 |
| tc Rep: Chromosome chr11 scaffold_13, whole genome shotgun sequence - Vitis vi       | 29.62   | 1 |
| tc Rep: Protein ABIL1 - Arabidopsis thaliana (Mouse-ear cress), partial (12%) [TC725 | 219.95  | 1 |
| gb KF8C.102P04F.051214T7 KF8 Nicotiana tabacum cDNA clone KF8C.102P04, mRN           | 27.37   | 1 |
| gb AGN_ELP014xd23f1.ab1 AGN_ELP Nicotiana tabacum cDNA 5', mRNA sequence             | 514.5   | 1 |
| gb KG9B.105J18F.051128T7 KG9B Nicotiana tabacum cDNA clone KG9B.105J18, mF           | 408.82  | 1 |
| Unknown                                                                              | 240.36  | 1 |
| gb TT-50_M03 K326 late senescent leaf library Nicotiana tabacum cDNA, mRNA sec       | 848.26  | 1 |
| tc Rep: Nitrate reductase [NADH] 1 - Nicotiana tabacum (Common tobacco), compl       | 85.97   | 1 |
| gb KP1B.110M19F.050727T7 KP1B Nicotiana tabacum cDNA clone KP1B.110M19, r            | 192.52  | 1 |

|                                                                                        |          |   |
|----------------------------------------------------------------------------------------|----------|---|
| tc Rep: Chromosome chr11 scaffold_13, whole genome shotgun sequence - Vitis vi         | 55.32    | 1 |
| gb KL4B.102J09F.051125T7 KL4B Nicotiana tabacum cDNA clone KL4B.102J09, mRNA           | 3814.1   | 1 |
| tc Rep: Chromosome chr17 scaffold_101, whole genome shotgun sequence - Vitis v         | 169.81   | 1 |
| gb Nicotiana tabacum cDNA-AFLP-fragment BSTC2-23-220, cultivar Bright Yellow 2         | 46.42    | 1 |
| Unknown                                                                                | 36.45    | 1 |
| tc Rep: Chromosome chr18 scaffold_61, whole genome shotgun sequence - Vitis vi         | 746.25   | 1 |
| tc Rep: Ly200 protein - Capsicum annuum (Bell pepper), complete [TC52727]              | 86.09    | 1 |
| tc Rep: Chromosome chr13 scaffold_210, whole genome shotgun sequence - Vitis v         | 3960.46  | 1 |
| Unknown                                                                                | 40.48    | 1 |
| tc Rep: Pre-mRNA-splicing factor SLU7 - Oryza sativa subsp. indica (Rice), partial (76 | 680.42   | 1 |
| Unknown                                                                                | 478.59   | 1 |
| Unknown                                                                                | 53.57    | 1 |
| Unknown                                                                                | 24.36    | 1 |
| Unknown                                                                                | 81.06    | 1 |
| Unknown                                                                                | 102.89   | 1 |
| Unknown                                                                                | 326.46   | 1 |
| tc Rep: Chromosome chr11 scaffold_13, whole genome shotgun sequence - Vitis vi         | 38.85    | 1 |
| tc Rep: Chromosome chr1 scaffold_5, whole genome shotgun sequence - Vitis vinif        | 53.15    | 1 |
| tc Rep: F5D14.18 protein - Arabidopsis thaliana (Mouse-ear cress), partial (11%) [TC   | 798.17   | 1 |
| tc Rep: SNF2-related; Zinc finger, RING-type; ATP-requiring DNA helicase RecQ - Me     | 28.89    | 1 |
| gb KG9B.002O05F.050720T7 KG9B Nicotiana tabacum cDNA clone KG9B.002O05, r              | 107.03   | 1 |
| tc Rep: NADH:ubiquinone oxidoreductase-like - Solanum tuberosum (Potato), comp         | 1031.07  | 1 |
| Unknown                                                                                | 21.52    | 1 |
| Unknown                                                                                | 682.09   | 1 |
| gb TT-47_N21 Burley21 trichome library Nicotiana tabacum cDNA, mRNA sequence           | 113.6    | 1 |
| gb TOBESTR020D12 TOBEST cDNA library 1 Nicotiana tabacum cDNA 5', mRNA seq             | 194.89   | 1 |
| Unknown                                                                                | 40.18    | 1 |
| tc Rep: Chromosome chr1 scaffold_5, whole genome shotgun sequence - Vitis vinif        | 36.37    | 1 |
| gb KG9B.103M10F.051128T7 KG9B Nicotiana tabacum cDNA clone KG9B.103M10,                | 2980.14  | 1 |
| Unknown                                                                                | 23.21    | 1 |
| Unknown                                                                                | 35.77    | 1 |
| Unknown                                                                                | 31.34    | 1 |
| Unknown                                                                                | 50.68    | 1 |
| tc Rep: Actin - Phalaenopsis hybrid cultivar, partial (39%) [TC69811]                  | 33203.05 | 1 |



|                                                                                       |         |   |
|---------------------------------------------------------------------------------------|---------|---|
| gb Nicotiana tabacum partial mRNA for putative chloroplast cysteine synthase 1 pr     | 90.95   | 1 |
| Unknown                                                                               | 251.3   | 1 |
| gb KN6B.102M01F.051230T7 KN6B Nicotiana tabacum cDNA clone KN6B.102M01,               | 39811.6 | 1 |
| tc Rep: ATP synthase delta chain - Buchnera aphidicola subsp. Schizaphis graminum     | 38.41   | 1 |
| tc Rep: Serine/threonine-protein phosphatase PP1 - Brassica napus (Rape), partial (   | 2762.99 | 1 |
| tc Rep: Chromosome chr6 scaffold_3, whole genome shotgun sequence - Vitis vinif       | 22.22   | 1 |
| gb BP133763 MAT001 Nicotiana tabacum cDNA clone BY6059, mRNA sequence [BF             | 64.35   | 1 |
| gb Nicotiana tabacum NtYSL1 mRNA for putative yellow stripe-like protein, comple      | 142.55  | 1 |
| tc Rep: Chromosome chr6 scaffold_15, whole genome shotgun sequence - Vitis vin        | 130.36  | 1 |
| Unknown                                                                               | 336.65  | 1 |
| gb KG9B.005J14F.050721T7 KG9B Nicotiana tabacum cDNA clone KG9B.005J14, mF            | 1548.76 | 1 |
| gb Nicotiana tabacum cDNA-AFLP-fragment BSTT12-4-420, cultivar Bright Yellow 2        | 67.03   | 1 |
| tc Rep: Pyrroline-5-carboxylate reductase - Actinidia chinensis (Kiwi) (Yangtao), par | 96.12   | 1 |
| tc Rep: Salt-induced AAA-Type ATPase - Mesembryanthemum crystallinum (Comm            | 139.07  | 1 |
| gb TL13.111K09F.060320T7 TL13 Nicotiana tabacum cDNA clone TL13.111K09, mRI           | 223.38  | 1 |
| Unknown                                                                               | 57.65   | 1 |
| gb KL4B.112I10F.060131T7 KL4B Nicotiana tabacum cDNA clone KL4B.112I10, mRN           | 1019.17 | 1 |
| gb TT-17_K11 K326 early senescent leaf library Nicotiana tabacum cDNA, mRNA se        | 72.47   | 1 |
| gb Nicotiana tabacum proline oxidase [AY639145]                                       | 4073.13 | 1 |
| tc Rep: Chromosome chr14 scaffold_9, whole genome shotgun sequence - Vitis vin        | 56.9    | 1 |
| gb KR2B.109P14F.051229T7 KR2B Nicotiana tabacum cDNA clone KR2B.109P14, ml            | 834.78  | 1 |
| Unknown                                                                               | 42.25   | 1 |
| Unknown                                                                               | 352.41  | 1 |
| Unknown                                                                               | 230.47  | 1 |
| tc Rep: Chromosome chr4 scaffold_32, whole genome shotgun sequence - Vitis vin        | 151.31  | 1 |
| tc Rep: Eukaryotic translation initiation factor 3 subunit A - Nicotiana tabacum (Cor | 103.99  | 1 |
| gb KL4B.105A10F.051104T7 KL4B Nicotiana tabacum cDNA clone KL4B.105A10, mF            | 2654.06 | 1 |
| gb KP1B.108C10F.050726T7 KP1B Nicotiana tabacum cDNA clone KP1B.108C10, ml            | 951.63  | 1 |
| gb KL4B.103E09F.051103T7 KL4B Nicotiana tabacum cDNA clone KL4B.103E09, mR            | 1589.8  | 1 |
| tc Rep: Chromosome chr11 scaffold_13, whole genome shotgun sequence - Vitis vi        | 166.44  | 1 |
| Unknown                                                                               | 26.79   | 1 |
| Unknown                                                                               | 19040.9 | 1 |
| tc Rep: StubSNF1 protein - Solanum tuberosum (Potato), partial (45%) [TC41271]        | 5123.64 | 1 |
| tc Rep: Chromosome undetermined scaffold_608, whole genome shotgun sequenc            | 31.59   | 1 |

|                                                                                        |          |   |
|----------------------------------------------------------------------------------------|----------|---|
| Unknown                                                                                | 107.59   | 1 |
| tc Rep: Pollen coat-like protein - Arabidopsis thaliana (Mouse-ear cress), partial (58 | 26.76    | 1 |
| Unknown                                                                                | 21.08    | 1 |
| gb CHO_SL023xn07f1.ab1 CHO_SL Nicotiana tabacum cDNA, mRNA sequence [EH6               | 43.54    | 1 |
| tc Rep: Ribosome recycling factor, chloroplast precursor - Daucus carota (Carrot), p   | 38.51    | 1 |
| tc Rep: Serine/threonine protein kinase SAPK8-like protein - Solanum tuberosum (F      | 35.93    | 1 |
| gb KG9B.001M19F.050628T7 KG9B Nicotiana tabacum cDNA clone KG9B.001M19,                | 59.62    | 1 |
| Unknown                                                                                | 590.49   | 1 |
| gb AGN_RNC030xm24f1.ab1 AGN_RNC Nicotiana tabacum cDNA 5', mRNA sequen                 | 55.64    | 1 |
| tc Rep: UDP-glucose:protein transglucosylase-like protein SIUPTG1 - Solanum lycop      | 681.95   | 1 |
| gb Nicotiana tabacum osmotic stress-activated protein kinase (OSAK) mRNA, comp         | 93.39    | 1 |
| tc Rep: BZIP transcription factor BZI-4 - Nicotiana tabacum (Common tobacco), con      | 4692.86  | 1 |
| tc Rep: Chromosome chr8 scaffold_34, whole genome shotgun sequence - Vitis vin         | 140.7    | 1 |
| Unknown                                                                                | 24.26    | 1 |
| Unknown                                                                                | 18.94    | 1 |
| Unknown                                                                                | 151.25   | 1 |
| tc Rep: Chromosome chr5 scaffold_2, whole genome shotgun sequence - Vitis vinif        | 3204.68  | 1 |
| gb TT-19_N02 Samsun trichome library Nicotiana tabacum cDNA, mRNA sequence             | 560.4    | 1 |
| gb BP534468 MAT005 Nicotiana tabacum cDNA clone BY33047, mRNA sequence [E              | 747.47   | 1 |
| gb AGN_RPC027xi20f1.ab1 AGN_RPC Nicotiana tabacum cDNA 5', mRNA sequence               | 1528.13  | 1 |
| tc Rep: E1 alpha subunit of pyruvate dehydrogenase - Petunia hybrida (Petunia), pa     | 5937.15  | 1 |
| tc Rep: F9L1.14 protein - Arabidopsis thaliana (Mouse-ear cress), partial (28%) [TC7   | 25.57    | 1 |
| Unknown                                                                                | 978.6    | 1 |
| tc Rep: Chromosome chr7 scaffold_20, whole genome shotgun sequence - Vitis vin         | 36.31    | 1 |
| tc Rep: Prephenate dehydratase family protein - Solanum demissum (Wild potato),        | 51.64    | 1 |
| Unknown                                                                                | 115.61   | 1 |
| gb TT-18_O05 K326 late senescent leaf library Nicotiana tabacum cDNA, mRNA seq         | 16432.95 | 1 |
| Unknown                                                                                | 23.62    | 1 |
| Unknown                                                                                | 31.07    | 1 |
| Unknown                                                                                | 151.31   | 1 |
| gb EST_FLW002xc16f1.ab1 EST_FLW Nicotiana tabacum cDNA, mRNA sequence [E]              | 206.79   | 1 |
| Unknown                                                                                | 20.7     | 1 |
| gb AGN_RPC020xk05f1.ab1 AGN_RPC Nicotiana tabacum cDNA 5', mRNA sequenc                | 31.5     | 1 |
| tc Rep: Predicted protein - Botryotinia fuckeliana (strain B05.10) (Noble rot fungus)  | 21.27    | 1 |

|                                                                                      |         |   |
|--------------------------------------------------------------------------------------|---------|---|
| Unknown                                                                              | 79.25   | 1 |
| gb KP1B.110D03F.050727T7 KP1B Nicotiana tabacum cDNA clone KP1B.110D03, m            | 250.92  | 1 |
| tc Rep: Chromosome chr9 scaffold_104, whole genome shotgun sequence - Vitis vi       | 42.33   | 1 |
| tc Rep: Chromosome chr18 scaffold_1, whole genome shotgun sequence - Vitis vin       | 2868.94 | 1 |
| Unknown                                                                              | 87.98   | 1 |
| gb Nicotiana tabacum NtWRKY-6 mRNA for WRKY DNA-binding protein, complete c          | 112.94  | 1 |
| tc Rep: Chromosome undetermined scaffold_339, whole genome shotgun sequenc           | 54      | 1 |
| Unknown                                                                              | 80.78   | 1 |
| tc Rep: Chromosome chr16 scaffold_86, whole genome shotgun sequence - Vitis vi       | 213.28  | 1 |
| tc Rep: Chromosome chr12 scaffold_36, whole genome shotgun sequence - Vitis vi       | 1164.69 | 1 |
| gb Nicotiana tabacum nack2 mRNA for kinesin-like protein NACK2, complete cds [A      | 38.18   | 1 |
| tc Rep: Cysteine synthase - Solanum tuberosum (Potato), partial (97%) [TC46420]      | 20.37   | 1 |
| tc Rep: Chromosome chr16 scaffold_86, whole genome shotgun sequence - Vitis vi       | 273.46  | 1 |
| Unknown                                                                              | 189.38  | 1 |
| tc Rep: Ubiquinol-cytochrome c reductase complex 6.7 kDa protein - Solanum tube      | 9775.27 | 1 |
| Unknown                                                                              | 44.97   | 1 |
| Unknown                                                                              | 1289.97 | 1 |
| tc Rep: NADH-ubiquinone oxidoreductase chain 1 - Stomoxys calcitrans (Stable fly),   | 1766.54 | 1 |
| gb KR2B.113M10F.060128T7 KR2B Nicotiana tabacum cDNA clone KR2B.113M10, r            | 118.54  | 1 |
| gb KL4B.106C07F.051125T7 KL4B Nicotiana tabacum cDNA clone KL4B.106C07, mR           | 73.04   | 1 |
| gb TT-09_J12 Burley21 trichome library Nicotiana tabacum cDNA, mRNA sequence         | 525.15  | 1 |
| Unknown                                                                              | 55.62   | 1 |
| gb KN6B.115A02F.060127T7 KN6B Nicotiana tabacum cDNA clone KN6B.115A02, n            | 103.84  | 1 |
| tc Rep: Chromosome chr3 scaffold_199, whole genome shotgun sequence - Vitis vi       | 2588.18 | 1 |
| tc Rep: Chromosome undetermined scaffold_144, whole genome shotgun sequenc           | 2856.84 | 1 |
| gb KL4B.101A05F.051103T7 KL4B Nicotiana tabacum cDNA clone KL4B.101A05, mF           | 249.73  | 1 |
| Unknown                                                                              | 17.71   | 1 |
| tc Rep: Chromosome chr6 scaffold_3, whole genome shotgun sequence - Vitis vinif      | 229.34  | 1 |
| tc Rep: Predicted protein - Physcomitrella patens subsp. patens, partial (69%) [TC5: | 522.44  | 1 |
| gb XXXP141 Nicotiana tabacum Pollen PCR-based subtractive library Nicotiana tabac    | 36.52   | 1 |
| gb FS391062 normalized full-length tobacco cDNA library Nicotiana tabacum cDNA       | 79.32   | 1 |
| tc Rep: Histone H4 [Contains: Osteogenic growth peptide (OGP)]. - Rattus norvegicus  | 1259.24 | 1 |
| gb KT7C.106J08F.051219T7 KT7 Nicotiana tabacum cDNA clone KT7C.106J08, mRN           | 23.61   | 1 |
| gb KT7C.102B06F.051216T7 KT7 Nicotiana tabacum cDNA clone KT7C.102B06, mRN           | 201.29  | 1 |

|                                                                                     |         |   |
|-------------------------------------------------------------------------------------|---------|---|
| tc Rep: SAT5 - Pisum sativum (Garden pea), partial (70%) [TC41109]                  | 521.39  | 1 |
| Unknown                                                                             | 114.62  | 1 |
| gb KN6B.105B12F.060104T7 KN6B Nicotiana tabacum cDNA clone KN6B.105B12, r           | 14449.7 | 1 |
| gb KL4B.105H12F.051104T7 KL4B Nicotiana tabacum cDNA clone KL4B.105H12, mF          | 161.09  | 1 |
| tc Rep: MRNA, complete cds, clone: RAFL25-18-P16 - Arabidopsis thaliana (Mouse-     | 52.15   | 1 |
| tc Rep: Sulfate adenylyltransferase - Solanum tuberosum (Potato), partial (95%) [TC | 1538.66 | 1 |
| tc Rep: Mitochondrial phosphate transporter - Lotus japonicus, partial (88%) [TC44. | 31.35   | 1 |
| Unknown                                                                             | 539.59  | 1 |
| tc Rep: Chromosome chr7 scaffold_20, whole genome shotgun sequence - Vitis vin      | 150.16  | 1 |
| tc Rep: Chromosome chr17 scaffold_101, whole genome shotgun sequence - Vitis v      | 220.47  | 1 |
| gb TT-19_G14 tobacco leaf library Nicotiana tabacum cDNA, mRNA sequence [FG6:       | 85.33   | 1 |
| tc Rep: Chromosome chr11 scaffold_170, whole genome shotgun sequence - Vitis v      | 383.5   | 1 |
| Unknown                                                                             | 2234.77 | 1 |
| Unknown                                                                             | 105.27  | 1 |
| tc Rep: Proteasome subunit beta type-6 precursor - Nicotiana tabacum (Common t      | 110.26  | 1 |
| Unknown                                                                             | 259.87  | 1 |
| gb KL4B.104H17F.051104T7 KL4B Nicotiana tabacum cDNA clone KL4B.104H17, mF          | 721.86  | 1 |
| Unknown                                                                             | 790.42  | 1 |
| gb KG9B.102A13F.051126T7 KG9B Nicotiana tabacum cDNA clone KG9B.102A13, n           | 152.64  | 1 |
| tc Rep: Chromosome chr13 scaffold_17, whole genome shotgun sequence - Vitis vi      | 1620.97 | 1 |
| gb 10D01 Transformed tobacco Lambda Zap II library Nicotiana tabacum cDNA 5', r     | 237.93  | 1 |
| gb KG9B.106L19F.051129T7 KG9B Nicotiana tabacum cDNA clone KG9B.106L19, m           | 92.75   | 1 |
| Unknown                                                                             | 309.3   | 1 |
| gb KR2B.105A21F.051227T7 KR2B Nicotiana tabacum cDNA clone KR2B.105A21, m           | 1143.52 | 1 |
| gb Nicotiana tabacum cDNA-AFLP-fragment BSTT44-3-240, cultivar Bright Yellow 2      | 48.24   | 1 |
| tc Rep: Chromosome chr7 scaffold_31, whole genome shotgun sequence - Vitis vin      | 570.93  | 1 |
| gb AGN_RNC025xc17f1.ab1 AGN_RNC Nicotiana tabacum cDNA 5', mRNA sequenc             | 18.2    | 1 |
| Unknown                                                                             | 61.82   | 1 |
| gb KG9B.002E04F.050720T7 KG9B Nicotiana tabacum cDNA clone KG9B.002E04, m           | 643.84  | 1 |
| gb Nicotiana tabacum S-adenosyl-L-homocysteine hydrolase (SAHH4) mRNA, comp         | 1601.49 | 1 |
| Unknown                                                                             | 2374.83 | 1 |
| gb Nicotiana tabacum mRNA for proteasome A-type subunit [Y16644]                    | 125.13  | 1 |
| gb KT7C.112B13F.051221T7 KT7 Nicotiana tabacum cDNA clone KT7C.112B13, mRf          | 5019.44 | 1 |
| gb AGN_RNC029xd05f1.ab1 AGN_RNC Nicotiana tabacum cDNA 5', mRNA sequenc             | 21.48   | 1 |

|                                                                                       |          |   |
|---------------------------------------------------------------------------------------|----------|---|
| tc Rep: 2-polyprenyl-3-methyl-5-hydroxy-6-methoxy-1, 4-benzoquinol methylase - T      | 100.21   | 1 |
| Unknown                                                                               | 26.64    | 1 |
| tc Rep: Ethylene-responsive small GTP-binding protein - Solanum lycopersicum (To      | 9590.44  | 1 |
| gb AGN_PNL222af1_c12.trimmed.seq AGN_PNL Nicotiana tabacum cDNA 5', mRNA              | 2702.05  | 1 |
| gb FS423299 normalized full-length tobacco cDNA library Nicotiana tabacum cDNA        | 62.33    | 1 |
| tc Rep: 50S ribosomal protein L17 - Syntrophomonas wolfei subsp. wolfei (strain Gc    | 1379.59  | 1 |
| gb KN6B.109M18F.060106T7 KN6B Nicotiana tabacum cDNA clone KN6B.109M18,               | 165.44   | 1 |
| Unknown                                                                               | 119.86   | 1 |
| gb KR3B.104I03F.051108T7 KR3B Nicotiana tabacum cDNA clone KR3B.104I03, mRl           | 57.2     | 1 |
| gb AGN_ELP012xj01f1.ab1 AGN_ELP Nicotiana tabacum cDNA 5', mRNA sequence              | 54.61    | 1 |
| gb CHO_SL017xj24f1.ab1 CHO_SL Nicotiana tabacum cDNA, mRNA sequence [EH61             | 37.4     | 1 |
| gb KL4B.101N15F.051103T7 KL4B Nicotiana tabacum cDNA clone KL4B.101N15, mF            | 1489.04  | 1 |
| gb KR2B.002L12F.051019T7 KR2B Nicotiana tabacum cDNA clone KR2B.002L12, mF            | 100.71   | 1 |
| tc Rep: Chromosome chr7 scaffold_20, whole genome shotgun sequence - Vitis vin        | 268.26   | 1 |
| tc Rep: Chromosome chr1 scaffold_84, whole genome shotgun sequence - Vitis vin        | 854.26   | 1 |
| Unknown                                                                               | 877.05   | 1 |
| gb Nicotiana tabacum mRNA for putative 16kDa membrane protein [AJ272037]              | 61.63    | 1 |
| gb Nicotiana tabacum microsomal omega-6-desaturase (FAD2) mRNA, complete cc           | 45283.55 | 1 |
| tc Rep: Chromosome chr4 scaffold_162, whole genome shotgun sequence - Vitis vi        | 287.32   | 1 |
| tc Rep: Chromosome chr8 scaffold_29, whole genome shotgun sequence - Vitis vin        | 433.58   | 1 |
| gb KF8B.202N08F.060124T7 KF8 Nicotiana tabacum cDNA clone KF8B.202N08, mRl            | 42.51    | 1 |
| tc Rep: Ribosomal protein L37 - Glycine max (Soybean), complete [TC54477]             | 326.91   | 1 |
| tc Rep: Chromosome chr5 scaffold_2, whole genome shotgun sequence - Vitis vinif       | 28.41    | 1 |
| gb KL5B.114K06F.060217T7 KL5B Nicotiana tabacum cDNA clone KL5B.114K06, mR            | 43.05    | 1 |
| Unknown                                                                               | 18.98    | 1 |
| gb KL5B.112H09F.060215T7 KL5B Nicotiana tabacum cDNA clone KL5B.112H09, mF            | 47.76    | 1 |
| tc Rep: Predicted protein - Physcomitrella patens subsp. patens, partial (9%) [TC688  | 33.87    | 1 |
| tc Rep: NADPH-cytochrome P450 oxidoreductase - Nicotiana tabacum (Common tc           | 38.94    | 1 |
| tc Rep: Progesterone 5-beta-reductase - Digitalis minor var. minor, partial (40%) [Ti | 2181.64  | 1 |
| gb AGN_PNL213cr1_d6.trimmed.seq AGN_PNL Nicotiana tabacum cDNA 3', mRNA               | 21.81    | 1 |
| tc Rep: 40S ribosomal protein S15-like - Solanum tuberosum (Potato), complete [Tc     | 70.28    | 1 |
| Unknown                                                                               | 273.19   | 1 |
| tc Rep: Chromosome chr17 scaffold_12, whole genome shotgun sequence - Vitis vi        | 699.91   | 1 |
| tc Rep: Chromosome chr8 scaffold_68, whole genome shotgun sequence - Vitis vin        | 27.24    | 1 |

|                                                                                           |          |   |
|-------------------------------------------------------------------------------------------|----------|---|
| Unknown                                                                                   | 692.58   | 1 |
| tc Rep: Voltage-dependent anion channel - Nicotiana tabacum (Common tobacco),             | 375.48   | 1 |
| Unknown                                                                                   | 92.19    | 1 |
| gb AGN_ELP016xe16f1.ab1 AGN_ELP Nicotiana tabacum cDNA 5', mRNA sequence                  | 96.8     | 1 |
| Unknown                                                                                   | 34.49    | 1 |
| Unknown                                                                                   | 87.05    | 1 |
| tc Rep: 14-3-3-like protein B - Nicotiana tabacum (Common tobacco), partial (50%)         | 49.46    | 1 |
| Unknown                                                                                   | 62.74    | 1 |
| tc Rep: Metallothionein-like protein - Nicotiana tabacum (Common tobacco), complete       | 42437.55 | 1 |
| Unknown                                                                                   | 36.09    | 1 |
| Unknown                                                                                   | 39546.6  | 1 |
| gb TL13.110G08F.060320T7 TL13 Nicotiana tabacum cDNA clone TL13.110G08, mRNA              | 152.73   | 1 |
| gb KT7C.102G19F.051216T7 KT7 Nicotiana tabacum cDNA clone KT7C.102G19, mRNA               | 199.69   | 1 |
| gb CHO_SL004xm10f1.ab1 CHO_SL Nicotiana tabacum cDNA, mRNA sequence [EHL100000]           | 135.63   | 1 |
| gb KR3B.103F05F.051108T7 KR3B Nicotiana tabacum cDNA clone KR3B.103F05, mRNA              | 33.28    | 1 |
| gb BP530311 MAT005 Nicotiana tabacum cDNA clone BY21319, mRNA sequence [EHL100000]        | 89.95    | 1 |
| gb N.tabacum mRNA for glutamine synthetase, gln1-3 [X95933]                               | 244.59   | 1 |
| gb Nicotiana tabacum mRNA for proteasome A-type subunit [Y16644]                          | 242      | 1 |
| tc Rep: Chromosome chr14 scaffold_27, whole genome shotgun sequence - Vitis vinifera      | 713.77   | 1 |
| Unknown                                                                                   | 157.11   | 1 |
| Unknown                                                                                   | 140.58   | 1 |
| tc Rep: CPR1-like cysteine proteinase - Nicotiana tabacum (Common tobacco), complete      | 61.8     | 1 |
| Unknown                                                                                   | 200.99   | 1 |
| Unknown                                                                                   | 65.93    | 1 |
| gb KP1B.110N09F.050727T7 KP1B Nicotiana tabacum cDNA clone KP1B.110N09, mRNA              | 973.82   | 1 |
| Unknown                                                                                   | 475.61   | 1 |
| tc Rep: Proteasome subunit alpha type - Vitis vinifera (Grape), partial (74%) [TC584]     | 25.47    | 1 |
| Unknown                                                                                   | 57.31    | 1 |
| gb AGN_RNC129xd21r1.ab1 AGN_RNC Nicotiana tabacum cDNA 3', mRNA sequence                  | 40.26    | 1 |
| gb KL5B.117K21F.060217T7 KL5B Nicotiana tabacum cDNA clone KL5B.117K21, mRNA              | 2511.41  | 1 |
| gb basic chitinase [Nicotiana tabacum=tobacco, cv Samsun nn, floral bud day 7 experiment] | 133.79   | 1 |
| gb Nicotiana tabacum clone PR20 mRNA sequence [AF154644]                                  | 21.44    | 1 |
| tc Rep: Histone H3 - Vitis vinifera (Grape), complete [TC47009]                           | 159.68   | 1 |
| Unknown                                                                                   | 59.2     | 1 |

|                                                                                     |         |   |
|-------------------------------------------------------------------------------------|---------|---|
| gb AGN_PNL222dr1_c8.trimmed.seq AGN_PNL Nicotiana tabacum cDNA 3', mRNA             | 573.27  | 1 |
| Unknown                                                                             | 1373.47 | 1 |
| gb AGN_PNL210df1_h6.trimmed.seq AGN_PNL Nicotiana tabacum cDNA 5', mRNA             | 38.6    | 1 |
| tc Rep: H+-transporting two-sector ATPase, C (AC39) subunit - Medicago truncatula   | 9378.59 | 1 |
| gb KT7C.105K23F.051219T7 KT7 Nicotiana tabacum cDNA clone KT7C.105K23, mRNA         | 24.66   | 1 |
| gb KF8B.200P08F.060120T7 KF8 Nicotiana tabacum cDNA clone KF8B.200P08, mRNA         | 23446.8 | 1 |
| gb KP1B.001F10F.050628T7 KP1B Nicotiana tabacum cDNA clone KP1B.001F10, mRNA        | 406.92  | 1 |
| tc Rep: Ly200 protein - Capsicum annuum (Bell pepper), complete [TC65471]           | 21.66   | 1 |
| Unknown                                                                             | 61.48   | 1 |
| Unknown                                                                             | 123.05  | 1 |
| Unknown                                                                             | 2724.7  | 1 |
| Unknown                                                                             | 923.77  | 1 |
| gb Nicotiana tabacum obtusifolios-14-demethylase (CYP51) mRNA, complete cds [A      | 72.45   | 1 |
| Unknown                                                                             | 792.76  | 1 |
| tc Rep: Two-component response regulator-like PRR37 - Oryza sativa subsp. indica    | 46.44   | 1 |
| gb N.tabacum mRNA for phosphoglycerate kinase (cytosolic isoenzyme) [Z48976]        | 1914.08 | 1 |
| tc Rep: Chromosome chr15 scaffold_19, whole genome shotgun sequence - Vitis vi      | 66.78   | 1 |
| Unknown                                                                             | 41.83   | 1 |
| gb TT-47_I23 Burley21 trichome library Nicotiana tabacum cDNA, mRNA sequence        | 810.12  | 1 |
| Unknown                                                                             | 43.11   | 1 |
| tc Rep: Chromosome undetermined scaffold_91, whole genome shotgun sequence          | 221.52  | 1 |
| tc Rep: Fas-associated factor 1-like protein - Capsicum annuum (Bell pepper), parti | 472.54  | 1 |
| gb AGN_ELP019xp05f1.ab1 AGN_ELP Nicotiana tabacum cDNA 5', mRNA sequence            | 19.18   | 1 |
| gb KP1B.107F12F.050726T7 KP1B Nicotiana tabacum cDNA clone KP1B.107F12, mRNA        | 21.15   | 1 |
| tc Rep: Chromosome chr2 scaffold_132, whole genome shotgun sequence - Vitis vi      | 2244.71 | 1 |
| tc Rep: Acireductone dioxygenase - Solanum tuberosum (Potato), complete [TC405      | 1019.7  | 1 |
| Unknown                                                                             | 229.64  | 1 |
| gb KG9B.005L07F.050721T7 KG9B Nicotiana tabacum cDNA clone KG9B.005L07, m           | 840.87  | 1 |
| Unknown                                                                             | 30.92   | 1 |
| Unknown                                                                             | 241.2   | 1 |
| gb KG9B.004M18F.050721T7 KG9B Nicotiana tabacum cDNA clone KG9B.004M18,             | 64.96   | 1 |
| Unknown                                                                             | 26.02   | 1 |
| tc Rep: Chromosome chr3 scaffold_8, whole genome shotgun sequence - Vitis vinif     | 28.25   | 1 |
| tc Rep: Cell division cycle protein 48 homolog - Capsicum annuum (Bell pepper), pa  | 4801.17 | 1 |

|                                                                                       |         |   |
|---------------------------------------------------------------------------------------|---------|---|
| gb KP1B.112G11F.060117T7 KP1B Nicotiana tabacum cDNA clone KP1B.112G11, m             | 248.92  | 1 |
| Unknown                                                                               | 65.56   | 1 |
| tc Rep: Chromosome chr6 scaffold_3, whole genome shotgun sequence - Vitis vinifera    | 495.91  | 1 |
| tc Rep: Vacuolar proton pump subunit F - Corchorus olitorius, complete [TC69780]      | 1270.49 | 1 |
| tc Rep: Chromosome chr13 scaffold_17, whole genome shotgun sequence - Vitis vinifera  | 35.83   | 1 |
| tc Rep: Nudix hydrolase 17, mitochondrial precursor - Arabidopsis thaliana (Mouse)    | 119.15  | 1 |
| Unknown                                                                               | 93.77   | 1 |
| gb KP1B.107P09F.050726T7 KP1B Nicotiana tabacum cDNA clone KP1B.107P09, m             | 9960.34 | 1 |
| tc Rep: Chromosome chr4 scaffold_83, whole genome shotgun sequence - Vitis vinifera   | 58.31   | 1 |
| gb Nicotiana tabacum blp1 mRNA for luminal binding protein (BiP), partial [X60060]    | 16599   | 1 |
| gb Nicotiana tabacum mRNA for protein kinase Ck2 regulatory subunit 2 (ck2beta2)      | 484.63  | 1 |
| tc Rep: Chromosome chr19 scaffold_111, whole genome shotgun sequence - Vitis vinifera | 157.52  | 1 |
| Unknown                                                                               | 29.29   | 1 |
| gb Nicotiana tabacum diacylglycerol acylCoA acyltransferase (DAGAT) mRNA, complete    | 593.06  | 1 |
| Unknown                                                                               | 22.37   | 1 |
| tc Rep: ORF45 protein - Spinacia oleracea (Spinach), partial (60%) [TC76983]          | 24.07   | 1 |
| Unknown                                                                               | 100.92  | 1 |
| tc Rep: GPI-anchored protein - Vigna radiata, partial (24%) [TC66563]                 | 910     | 1 |
| tc Rep: Ubiquitin carrier protein - Arachis hypogaea (Peanut), complete [TC49627]     | 419.62  | 1 |
| gb CHO_SL006xm14f1.ab1 CHO_SL Nicotiana tabacum cDNA, mRNA sequence [EH6252]          | 969.9   | 1 |
| Unknown                                                                               | 27.69   | 1 |
| gb AGN_RNC023xo09f1.ab1 AGN_RNC Nicotiana tabacum cDNA 5', mRNA sequence [EH6252]     | 123.79  | 1 |
| gb KP1B.001O22F.050628T7 KP1B Nicotiana tabacum cDNA clone KP1B.001O22, mRNA sequence | 649.21  | 1 |
| gb TT-25_O16 Samsun trichome library Nicotiana tabacum cDNA, mRNA sequence            | 778.64  | 1 |
| gb CHO_SL025xf17f1.ab1 CHO_SL Nicotiana tabacum cDNA, mRNA sequence [EH6252]          | 540.94  | 1 |
| Unknown                                                                               | 18.7    | 1 |
| gb KR2B.115C11F.051230T7 KR2B Nicotiana tabacum cDNA clone KR2B.115C11, mRNA sequence | 172.04  | 1 |
| gb ntsm10 embryogenic microspores Nicotiana tabacum cDNA, mRNA sequence [E6252]       | 224.65  | 1 |
| gb KT7C.105A16F.051219T7 KT7 Nicotiana tabacum cDNA clone KT7C.105A16, mRNA sequence  | 174.84  | 1 |
| gb KG9B.106P22F.051129T7 KG9B Nicotiana tabacum cDNA clone KG9B.106P22, mRNA sequence | 2393.36 | 1 |
| gb TT-40_F13 K326 early senescent leaf library Nicotiana tabacum cDNA, mRNA sequence  | 278.5   | 1 |
| Unknown                                                                               | 33.1    | 1 |
| gb BP132909 MAT001 Nicotiana tabacum cDNA clone BY5120, mRNA sequence [BF6252]        | 18.5    | 1 |
| gb CHO_SL008xb22f1.ab1 CHO_SL Nicotiana tabacum cDNA, mRNA sequence [EH6252]          | 23.27   | 1 |



|                                                                                       |          |   |
|---------------------------------------------------------------------------------------|----------|---|
| Unknown                                                                               | 43.53    | 1 |
| Unknown                                                                               | 626.81   | 1 |
| gb KN6B.109C02F.060106T7 KN6B Nicotiana tabacum cDNA clone KN6B.109C02, r             | 26.19    | 1 |
| Unknown                                                                               | 4256.2   | 1 |
| tc Rep: Chromosome chr6 scaffold_3, whole genome shotgun sequence - Vitis vinif       | 4552.52  | 1 |
| tc Rep: Chromosome chr7 scaffold_31, whole genome shotgun sequence - Vitis vin        | 24.65    | 1 |
| gb CHO_SL006xc12f1.ab1 CHO_SL Nicotiana tabacum cDNA, mRNA sequence [EH6              | 1058.21  | 1 |
| gb AM802729 COL, cold overnight library Nicotiana tabacum cDNA clone nt006217         | 87.26    | 1 |
| gb KP1B.104K12F.050725T7 KP1B Nicotiana tabacum cDNA clone KP1B.104K12, m             | 11083.95 | 1 |
| tc Rep: Granule-bound starch synthase 1, chloroplast precursor - Solanum tuberosu     | 45.66    | 1 |
| gb KG9B.001I09F.050628T7 KG9B Nicotiana tabacum cDNA clone KG9B.001I09, m             | 964.55   | 1 |
| gb Nicotiana tabacum mitogen-activated protein kinase Ntf4-1 mRNA, complete cc        | 1392.31  | 1 |
| Unknown                                                                               | 60.27    | 1 |
| gb AGN_PNL216cf1_b9.trimmed.seq AGN_PNL Nicotiana tabacum cDNA 5', mRNA               | 1111.34  | 1 |
| tc Rep: lipase class 3 family protein - Arabidopsis thaliana, partial (65%) [TC44539] | 387.26   | 1 |
| tc Rep: Microtubule-associated protein 1 light chain 3 - Gossypium hirsutum (Uplar    | 1543.86  | 1 |
| gb KG9B.103C11F.051128T7 KG9B Nicotiana tabacum cDNA clone KG9B.103C11, r             | 45.49    | 1 |
| Unknown                                                                               | 187.85   | 1 |
| gb KR3B.001P23F.050815T7 KR3B Nicotiana tabacum cDNA clone KR3B.001P23, m             | 653.04   | 1 |
| tc Rep: Possible DNA polymerase III delta prime subunit - Bifidobacterium adolesce    | 72.95    | 1 |
| tc Rep: Transcription factor - Enterocytozoon bieneusi H348, partial (11%) [TC7714    | 588.85   | 1 |
| Unknown                                                                               | 25.57    | 1 |
| tc Rep: Peptide methionine sulfoxide reductase (Protein- methionine-S-oxide redu      | 74.66    | 1 |
| gb CHO_SL017xb13f1.ab1 CHO_SL Nicotiana tabacum cDNA, mRNA sequence [EH6              | 190.73   | 1 |
| tc Rep: Superoxide dismutase [Mn], mitochondrial precursor - Capsicum annuum (f       | 89.43    | 1 |
| Unknown                                                                               | 73.03    | 1 |
| gb KL4B.101M16F.051103T7 KL4B Nicotiana tabacum cDNA clone KL4B.101M16, r             | 98.1     | 1 |
| gb KG9B.003L23F.050720T7 KG9B Nicotiana tabacum cDNA clone KG9B.003L23, m             | 136.65   | 1 |
| Unknown                                                                               | 42.77    | 1 |
| gb AGN_RPC025xj09f1.ab1 AGN_RPC Nicotiana tabacum cDNA 5', mRNA sequence              | 23.41    | 1 |
| tc Rep: Histone H4 [Contains: Osteogenic growth peptide (OGP)]. - Rattus norvegici    | 1039.44  | 1 |
| tc Rep: Chromosome chr9 scaffold_7, whole genome shotgun sequence - Vitis vinif       | 45882    | 1 |
| Unknown                                                                               | 21.22    | 1 |
| tc Rep: Chromosome chr8 scaffold_23, whole genome shotgun sequence - Vitis vin        | 107.19   | 1 |

|                                                                                         |          |   |
|-----------------------------------------------------------------------------------------|----------|---|
| gb KF8B.100D07F.051010T7 KF8 Nicotiana tabacum cDNA clone KF8B.100D07, mR               | 1183.42  | 1 |
| gb KF8C.103M14F.051214T7 KF8 Nicotiana tabacum cDNA clone KF8C.103M14, mF               | 35.49    | 1 |
| Unknown                                                                                 | 441.56   | 1 |
| tc Rep: Chromosome chr19 scaffold_4, whole genome shotgun sequence - Vitis vin          | 580.75   | 1 |
| Unknown                                                                                 | 31.63    | 1 |
| tc Rep: Chromosome chr10 scaffold_138, whole genome shotgun sequence - Vitis v          | 970.62   | 1 |
| gb KN6B.102A05F.051230T7 KN6B Nicotiana tabacum cDNA clone KN6B.102A05, n               | 52.38    | 1 |
| gb KF8C.108G03F.051215T7 KF8 Nicotiana tabacum cDNA clone KF8C.108G03, mR               | 65.33    | 1 |
| gb AGN_RPC017xn01f1.ab1 AGN_RPC Nicotiana tabacum cDNA 5', mRNA sequenc                 | 61.32    | 1 |
| gb KT7C.110M19F.051221T7 KT7 Nicotiana tabacum cDNA clone KT7C.110M19, mI               | 793.68   | 1 |
| Unknown                                                                                 | 240.71   | 1 |
| Unknown                                                                                 | 2774.6   | 1 |
| Unknown                                                                                 | 80.31    | 1 |
| Unknown                                                                                 | 22.81    | 1 |
| gb TT-30_H15 Burley21 trichome library Nicotiana tabacum cDNA, mRNA sequenc             | 28.78    | 1 |
| Unknown                                                                                 | 62.3     | 1 |
| tc Rep: Ubiquitin carrier protein - Vitis vinifera (Grape), complete [TC56781]          | 627.28   | 1 |
| Unknown                                                                                 | 211.97   | 1 |
| gb KP1B.107J22F.050726T7 KP1B Nicotiana tabacum cDNA clone KP1B.107J22, mR              | 273.14   | 1 |
| gb BP135342 MAT001 Nicotiana tabacum cDNA clone BY7842, mRNA sequence [Bf               | 14037.65 | 1 |
| tc Rep: Chromosome chr8 scaffold_41, whole genome shotgun sequence - Vitis vin          | 24.95    | 1 |
| tc Rep: 40S ribosomal protein S24 - Vitis vinifera (Grape), partial (96%) [TC48753]     | 33.59    | 1 |
| Unknown                                                                                 | 38.55    | 1 |
| tc Rep: DNA-binding protein - Nicotiana tabacum (Common tobacco), partial (63%)         | 2702.32  | 1 |
| tc Rep: Chromosome chr1 scaffold_46, whole genome shotgun sequence - Vitis vin          | 453.99   | 1 |
| Unknown                                                                                 | 388.5    | 1 |
| gb Nicotiana tabacum mRNA for phage-type RNA polymerase (rpoT1-tom gene) [A.            | 82.66    | 1 |
| gb KF8B.202M24F.060124T7 KF8 Nicotiana tabacum cDNA clone KF8B.202M24, mF               | 39.55    | 1 |
| gb AGN_PNL205df1_a12.trimmed.seq AGN_PNL Nicotiana tabacum cDNA 5', mRN                 | 207.12   | 1 |
| Unknown                                                                                 | 29.74    | 1 |
| gb TT-13_P17 Samsun trichome library Nicotiana tabacum cDNA, mRNA sequence              | 9440.15  | 1 |
| tc Rep: Eukaryotic translation initiation factor 3 subunit K - Oryza sativa subsp. japc | 84.9     | 1 |
| gb CHO_SL007xl24f1.ab1 CHO_SL Nicotiana tabacum cDNA, mRNA sequence [EH62               | 69.11    | 1 |
| tc Rep: Protein ULTRAPETALA 1 - Arabidopsis thaliana (Mouse-ear cress), partial (5:     | 1689.25  | 1 |

|                                                                                   |         |   |
|-----------------------------------------------------------------------------------|---------|---|
| gb KG9B.106M19F.051129T7 KG9B Nicotiana tabacum cDNA clone KG9B.106M19,           | 27.68   | 1 |
| gb KL4B.112K18F.060131T7 KL4B Nicotiana tabacum cDNA clone KL4B.112K18, mR        | 473.52  | 1 |
| Unknown                                                                           | 41.72   | 1 |
| tc Rep: Plastid glucose-6-phosphate/phosphate translocator - Helianthus annuus (C | 721.77  | 1 |
| gb AGN_RNC017xg05f1.ab1 AGN_RNC Nicotiana tabacum cDNA 5', mRNA sequenc           | 1161.1  | 1 |
| gb KG9B.103F04F.051128T7 KG9B Nicotiana tabacum cDNA clone KG9B.103F04, m         | 30.2    | 1 |
| Unknown                                                                           | 379.39  | 1 |
| tc Rep: Ribosomal protein S27 - Vitis vinifera (Grape), complete [TC58062]        | 64.23   | 1 |
| Unknown                                                                           | 685.19  | 1 |
| tc Rep: Succinyl CoA ligase beta subunit - Solanum lycopersicum (Tomato) (Lycoper | 506.42  | 1 |
| tc Rep: Chromosome chr14 scaffold_21, whole genome shotgun sequence - Vitis vi    | 1178.66 | 1 |
| tc Rep: Chromosome chr6 scaffold_3, whole genome shotgun sequence - Vitis vinif   | 243.96  | 1 |
| gb Nicotiana tabacum clone PR19 mRNA sequence [AF154643]                          | 18.87   | 1 |
| tc Rep: Predicted protein - Physcomitrella patens subsp. patens, complete [TC5815 | 46.61   | 1 |
| Unknown                                                                           | 94.24   | 1 |
| gb KL5B.001F22F.050901T7 KL5B Nicotiana tabacum cDNA clone KL5B.001F22, mR        | 23.04   | 1 |
| gb KL4B.109O09F.051105T7 KL4B Nicotiana tabacum cDNA clone KL4B.109O09, mR        | 523.87  | 1 |
| tc Rep: Chromosome chr4 scaffold_83, whole genome shotgun sequence - Vitis vin    | 99.67   | 1 |
| Unknown                                                                           | 42.79   | 1 |
| gb TT-09_J12 Burley21 trichome library Nicotiana tabacum cDNA, mRNA sequence      | 150.33  | 1 |
| Unknown                                                                           | 22.81   | 1 |
| Unknown                                                                           | 21.37   | 1 |
| Unknown                                                                           | 35.65   | 1 |
| gb KL4B.108M21F.051105T7 KL4B Nicotiana tabacum cDNA clone KL4B.108M21, mR        | 114.63  | 1 |
| tc Rep: Chromosome chr9 scaffold_33, whole genome shotgun sequence - Vitis vin    | 52682.3 | 1 |
| tc Rep: Chromosome chr14 scaffold_9, whole genome shotgun sequence - Vitis vin    | 244.88  | 1 |
| gb KL4B.102L15F.051125T7 KL4B Nicotiana tabacum cDNA clone KL4B.102L15, mR        | 1591.03 | 1 |
| tc Rep: Chromosome undetermined scaffold_383, whole genome shotgun sequenc        | 116.45  | 1 |
| Unknown                                                                           | 47.61   | 1 |
| tc Rep: Chromosome chr9 scaffold_7, whole genome shotgun sequence - Vitis vinif   | 538.93  | 1 |
| Unknown                                                                           | 21.87   | 1 |
| gb AGN_RNC107xj15r1.ab1 AGN_RNC Nicotiana tabacum cDNA 3', mRNA sequenc           | 21.06   | 1 |
| Unknown                                                                           | 21.68   | 1 |
| Unknown                                                                           | 43.66   | 1 |

|                                                                                         |         |   |
|-----------------------------------------------------------------------------------------|---------|---|
| tc Rep: Salt-induced AAA-Type ATPase - Mesembryanthemum crystallinum (Comm              | 80.65   | 1 |
| tc Rep: 26S protease regulatory subunit 6A homolog (TAT-binding protein homolog         | 442.75  | 1 |
| Unknown                                                                                 | 690.32  | 1 |
| gb KF8B.200B10F.060120T7 KF8 Nicotiana tabacum cDNA clone KF8B.200B10, mRNA             | 54.9    | 1 |
| tc Rep: 40S ribosomal protein S23 - Fragaria ananassa (Strawberry), complete [TC5-      | 206.18  | 1 |
| tc Rep: Chromosome chr2 scaffold_132, whole genome shotgun sequence - Vitis vi          | 807.56  | 1 |
| Unknown                                                                                 | 33.82   | 1 |
| tc Rep: Ubiquitin carboxyl-terminal hydrolase - Vitis vinifera (Grape), partial (7%) [T | 59.86   | 1 |
| Unknown                                                                                 | 53.91   | 1 |
| tc Rep: Ubiquitin extension protein - Solanum tuberosum (Potato), complete [TC51        | 98.62   | 1 |
| Unknown                                                                                 | 2722.76 | 1 |
| gb TT-12_H24 K326 late senescent leaf library Nicotiana tabacum cDNA, mRNA seq          | 173.75  | 1 |
| tc Rep: N-(5'-phosphoribosyl)anthranilate isomerase - Vitis vinifera (Grape), partial   | 521.5   | 1 |
| Unknown                                                                                 | 75.83   | 1 |
| tc Rep: Chromosome chr8 scaffold_34, whole genome shotgun sequence - Vitis vin          | 29.81   | 1 |
| gb KR3B.104M16F.051108T7 KR3B Nicotiana tabacum cDNA clone KR3B.104M16, r               | 291.48  | 1 |
| Unknown                                                                                 | 65.36   | 1 |
| gb BP534280 MAT005 Nicotiana tabacum cDNA clone BY32237, mRNA sequence [E               | 57.48   | 1 |
| gb KT7C.113E07F.051221T7 KT7 Nicotiana tabacum cDNA clone KT7C.113E07, mRNA             | 272.6   | 1 |
| gb KG9B.103O07F.051128T7 KG9B Nicotiana tabacum cDNA clone KG9B.103O07, r               | 539.67  | 1 |
| gb AGN_PNL229bf1_a1.trimmed.seq AGN_PNL Nicotiana tabacum cDNA 5', mRNA                 | 79      | 1 |
| gb KL4B.103K19F.051103T7 KL4B Nicotiana tabacum cDNA clone KL4B.103K19, mR              | 51.24   | 1 |
| Unknown                                                                                 | 37.94   | 1 |
| Unknown                                                                                 | 30.23   | 1 |
| tc Rep: Ribosomal protein L24E - Medicago truncatula (Barrel medic), complete [TC       | 151.53  | 1 |
| gb KF8C.106B04F.051215T7 KF8 Nicotiana tabacum cDNA clone KF8C.106B04, mRNA             | 86.13   | 1 |
| Unknown                                                                                 | 1122.1  | 1 |
| tc Rep: EMB1579 (EMBRYO DEFECTIVE 1579); binding - Arabidopsis thaliana, partia         | 133.8   | 1 |
| Unknown                                                                                 | 613.11  | 1 |
| Unknown                                                                                 | 19.17   | 1 |
| Unknown                                                                                 | 28.4    | 1 |
| gb CHO_SL011xi16f1.ab1 CHO_SL Nicotiana tabacum cDNA, mRNA sequence [EH61               | 1732.8  | 1 |
| gb KF8C.101K11F.051214T7 KF8 Nicotiana tabacum cDNA clone KF8C.101K11, mRNA             | 43.96   | 1 |
| gb TT-23_O11 Samsun trichome library Nicotiana tabacum cDNA, mRNA sequence              | 1547.81 | 1 |

|                                                                                      |         |   |
|--------------------------------------------------------------------------------------|---------|---|
| tc Rep: Glutathione S-transferase - Euphorbia esula (Leafy spurge), partial (87%) [T | 4321.05 | 1 |
| gb BP534488 MAT005 Nicotiana tabacum cDNA clone BY33067, mRNA sequence [E            | 246.76  | 1 |
| Unknown                                                                              | 20.82   | 1 |
| gb KG9B.105G09F.051128T7 KG9B Nicotiana tabacum cDNA clone KG9B.105G09, n            | 151.38  | 1 |
| gb AGN_RNC007xf16f1.ab1 AGN_RNC Nicotiana tabacum cDNA 5', mRNA sequenc              | 74.96   | 1 |
| tc Rep: At1g04290/F19P19_27 - Arabidopsis thaliana (Mouse-ear cress), partial (80    | 125.96  | 1 |
| gb KN6B.103G24F.060103T7 KN6B Nicotiana tabacum cDNA clone KN6B.103G24, n            | 227.14  | 1 |
| gb KP1B.101E18F.050722T7 KP1B Nicotiana tabacum cDNA clone KP1B.101E18, mF           | 694.8   | 1 |
| gb AM796086 seedling library, SL Nicotiana tabacum cDNA clone nt002064010, mF        | 333.98  | 1 |
| Unknown                                                                              | 65.74   | 1 |
| tc Rep: Os05g0119300 protein - Oryza sativa subsp. japonica (Rice), partial (63%) [T | 9994.08 | 1 |
| Unknown                                                                              | 79.56   | 1 |
| gb KF8C.103N03F.051214T7 KF8 Nicotiana tabacum cDNA clone KF8C.103N03, mRI           | 3007.89 | 1 |
| tc Rep: Chromosome chr8 scaffold_23, whole genome shotgun sequence - Vitis vin       | 175.69  | 1 |
| tc Rep: Luminal-binding protein 3 - Nicotiana tabacum (Common tobacco), partial (    | 11114.4 | 1 |
| gb KN6B.105L17F.060104T7 KN6B Nicotiana tabacum cDNA clone KN6B.105L17, m            | 100.49  | 1 |
| gb TT-09_J21 Burley21 trichome library Nicotiana tabacum cDNA, mRNA sequence         | 324.4   | 1 |
| gb TT-16_J10 Burley21 trichome library Nicotiana tabacum cDNA, mRNA sequence         | 34.46   | 1 |
| tc Rep: Chromosome chr12 scaffold_18, whole genome shotgun sequence - Vitis vi       | 57.57   | 1 |
| tc Rep: 40S ribosomal protein S5 - Capsicum annuum (Bell pepper), partial (96%) [T   | 71.3    | 1 |
| gb Nicotiana tabacum GNOM-like 1 protein mRNA, complete cds [EF520731]               | 3287.13 | 1 |
| Unknown                                                                              | 51.79   | 1 |
| tc Rep: Ribonuclease E - Lyngbya sp. PCC 8106, partial (3%) [TC65320]                | 32.44   | 1 |
| tc Rep: ADP ribosylation factor 002 - Daucus carota (Carrot), partial (93%) [TC5148! | 13479.5 | 1 |
| gb KL4B.105C19F.051104T7 KL4B Nicotiana tabacum cDNA clone KL4B.105C19, mR           | 423.77  | 1 |
| Unknown                                                                              | 123.43  | 1 |
| tc Rep: Chromosome chr8 scaffold_34, whole genome shotgun sequence - Vitis vin       | 129.52  | 1 |
| Unknown                                                                              | 66.57   | 1 |
| tc Rep: Regulator of ribonuclease-like protein 3 - Arabidopsis thaliana (Mouse-ear c | 23.8    | 1 |
| tc Rep: Chromosome chr5 scaffold_58, whole genome shotgun sequence - Vitis vin       | 513.02  | 1 |
| tc Rep: Ribosomal protein S10, eukaryotic and archaeal form - Medicago truncatula    | 200.49  | 1 |
| tc Rep: Inositol-3-phosphate synthase - Nicotiana tabacum (Common tobacco), par      | 468.14  | 1 |
| gb AGN_RPC005xd06f1.ab1 AGN_RPC Nicotiana tabacum cDNA 5', mRNA sequenc              | 100.62  | 1 |
| gb TT-22_D24 K326 early senescent leaf library Nicotiana tabacum cDNA, mRNA se       | 239.81  | 1 |

|                                                                                       |          |   |
|---------------------------------------------------------------------------------------|----------|---|
| gb KF8C.101E14F.051214T7 KF8 Nicotiana tabacum cDNA clone KF8C.101E14, mRN            | 22488.65 | 1 |
| gb KR3B.106M07F.051109T7 KR3B Nicotiana tabacum cDNA clone KR3B.106M07, r             | 277.48   | 1 |
| Unknown                                                                               | 19.57    | 1 |
| tc Rep: Eukaryotic peptide chain release factor subunit 1-3 - Oryza sativa subsp. jap | 59.07    | 1 |
| Unknown                                                                               | 25.83    | 1 |
| gb KN6B.105B09F.060104T7 KN6B Nicotiana tabacum cDNA clone KN6B.105B09, r             | 101.55   | 1 |
| tc Rep: Triosephosphate isomerase - Solanum tuberosum (Potato), complete [TC40        | 5840.61  | 1 |
| tc Rep: Chromosome chr8 scaffold_29, whole genome shotgun sequence - Vitis vin        | 153.2    | 1 |
| gb Nicotiana tabacum mRNA for NtSar1 protein, complete cds [D87821]                   | 19715.4  | 1 |
| gb TT-30_F06 K326 late senescent leaf library Nicotiana tabacum cDNA, mRNA seq        | 22.96    | 1 |
| gb KN6B.009O23F.050901T7 KN6B Nicotiana tabacum cDNA clone KN6B.009O23, r             | 2388.72  | 1 |
| tc Rep: Predicted protein - Chlamydomonas reinhardtii, partial (3%) [TC45915]         | 375.89   | 1 |
| gb AGN_RPC005xd04f1.ab1 AGN_RPC Nicotiana tabacum cDNA 5', mRNA sequenc               | 365.35   | 1 |
| tc Rep: Chromosome chr15 scaffold_37, whole genome shotgun sequence - Vitis vi        | 511.32   | 1 |
| tc Rep: Chromosome undetermined scaffold_257, whole genome shotgun sequenc            | 148.98   | 1 |
| gb Nicotiana tabacum ribosomal protein L3A (RPL3A) mRNA, complete cds [AY3957         | 34.75    | 1 |
| gb KL5B.011G19F.051129T7 KL5B Nicotiana tabacum cDNA clone KL5B.011G19, mF            | 179.58   | 1 |
| Unknown                                                                               | 102.78   | 1 |
| gb Nicotiana tabacum NtJAZ2 mRNA for jasmonate ZIM-domain protein 2, complet          | 531.82   | 1 |
| tc Rep: Chromosome chr17 scaffold_12, whole genome shotgun sequence - Vitis vi        | 124.39   | 1 |
| Unknown                                                                               | 41.47    | 1 |
| Unknown                                                                               | 105.9    | 1 |
| tc Rep: POM30-like protein - Solanum tuberosum (Potato), partial (36%) [TC64626]      | 523.28   | 1 |
| Unknown                                                                               | 1680.26  | 1 |
| Unknown                                                                               | 535.51   | 1 |
| tc Rep: Hypersensitive-induced response protein - Oryza sativa (Rice), partial (96%)  | 73.67    | 1 |
| tc Rep: Chromosome chr7 scaffold_44, whole genome shotgun sequence - Vitis vin        | 42.02    | 1 |
| tc Rep: Acyl-CoA binding protein - Digitalis lanata (Foxglove), partial (97%) [TC6334 | 7678.46  | 1 |
| tc Rep: 60S ribosomal protein L21-like protein - Solanum tuberosum (Potato), com      | 130.75   | 1 |
| tc Rep: Chromosome chr5 scaffold_2, whole genome shotgun sequence - Vitis vinif       | 1790.8   | 1 |
| Unknown                                                                               | 17371.85 | 1 |
| tc Rep: 50S ribosomal protein L33 - Vitis vinifera (Grape), partial (86%) [TC62776]   | 37.61    | 1 |
| Unknown                                                                               | 2127     | 1 |
| gb KR2B.107E11F.051229T7 KR2B Nicotiana tabacum cDNA clone KR2B.107E11, ml            | 21.13    | 1 |

|                                                                                              |         |   |
|----------------------------------------------------------------------------------------------|---------|---|
| gb AGN_RPC007xn02f1.ab1 AGN_RPC Nicotiana tabacum cDNA 5', mRNA sequence                     | 29.08   | 1 |
| Unknown                                                                                      | 1179.18 | 1 |
| Unknown                                                                                      | 22.96   | 1 |
| tc Rep: 40S ribosomal protein S15a-1 - Arabidopsis thaliana (Mouse-ear cress), complete cds  | 67.26   | 1 |
| gb Nicotiana tabacum mRNA for protoporphyrin IX oxidase, ppxII gene [Y13466]                 | 82.88   | 1 |
| gb AM847113 DL, diurnal library Nicotiana tabacum cDNA clone nt005140079, mRNA sequence      | 25.11   | 1 |
| gb TOBESTR123H09 TOBEST cDNA library 1 Nicotiana tabacum cDNA 5', mRNA sequence              | 513.19  | 1 |
| tc Rep: Delta-1-pyrroline-5-carboxylate synthetase (P5CS) [Includes: Glutamate 5-kinase]     | 42.17   | 1 |
| tc Rep: Chromosome undetermined scaffold_171, whole genome shotgun sequence                  | 264.18  | 1 |
| gb KG9B.103J17F.051128T7 KG9B Nicotiana tabacum cDNA clone KG9B.103J17, mRNA sequence        | 1297.36 | 1 |
| gb KP1B.037J03F.050628T7 KP1B Nicotiana tabacum cDNA clone KP1B.037J03, mRNA sequence        | 38.22   | 1 |
| tc Rep: Chromosome undetermined scaffold_298, whole genome shotgun sequence                  | 380.34  | 1 |
| gb TT-27_O15 K326 late senescent leaf library Nicotiana tabacum cDNA, mRNA sequence          | 18.34   | 1 |
| gb Nicotiana tabacum apyrase-like protein (APY1) mRNA, complete cds [EF051589]               | 5180.85 | 1 |
| gb KP1B.113I05F.060117T7 KP1B Nicotiana tabacum cDNA clone KP1B.113I05, mRNA sequence        | 698.76  | 1 |
| gb KF8B.200E12F.060128T7 KF8 Nicotiana tabacum cDNA clone KF8B.200E12, mRNA sequence         | 1950.3  | 1 |
| gb BP129934 MAT001 Nicotiana tabacum cDNA clone BY1843, mRNA sequence [BF000000]             | 92.93   | 1 |
| gb FS437228 normalized full-length tobacco cDNA library Nicotiana tabacum cDNA               | 3342.41 | 1 |
| tc Rep: Glutamate/malate translocator - Nicotiana tabacum (Common tobacco), complete cds     | 88.6    | 1 |
| tc Rep: Chromosome chr5 scaffold_156, whole genome shotgun sequence - Vitis vinifera         | 152.55  | 1 |
| tc Rep: Guanine nucleotide-binding protein subunit beta - Nicotiana tabacum (Common tobacco) | 110.47  | 1 |
| Unknown                                                                                      | 178.6   | 1 |
| tc Rep: Chromosome undetermined scaffold_346, whole genome shotgun sequence                  | 40.09   | 1 |
| gb AGN_PNL229bf1_b6.trimmed.seq AGN_PNL Nicotiana tabacum cDNA 5', mRNA sequence             | 45.64   | 1 |
| tc Rep: Expressed protein - Oryza sativa subsp. japonica (Rice), partial (57%) [TC705000]    | 13019.9 | 1 |
| Unknown                                                                                      | 106.31  | 1 |
| gb KG9B.105N09F.051128T7 KG9B Nicotiana tabacum cDNA clone KG9B.105N09, mRNA sequence        | 136.3   | 1 |
| tc Rep: Chromosome undetermined scaffold_123, whole genome shotgun sequence                  | 257.29  | 1 |
| gb AGN_RNC129xp14f1.ab1 AGN_RNC Nicotiana tabacum cDNA 5', mRNA sequence                     | 128.54  | 1 |
| gb TT-11_C11 K326 trichome library Nicotiana tabacum cDNA, mRNA sequence [FG000000]          | 8569.66 | 1 |
| Unknown                                                                                      | 6679.68 | 1 |
| gb AGN_RPC021xc19f1.ab1 AGN_RPC Nicotiana tabacum cDNA 5', mRNA sequence                     | 60.05   | 1 |
| gb KG9B.101P02F.060120T7 KG9B Nicotiana tabacum cDNA clone KG9B.101P02, mRNA sequence        | 950.14  | 1 |
| gb TT-10_L06 K326 early senescent leaf library Nicotiana tabacum cDNA, mRNA sequence         | 25.15   | 1 |

|                                                                                      |         |   |
|--------------------------------------------------------------------------------------|---------|---|
| gb Nicotiana tabacum B38 mRNA for Dnal homolog, complete cds [AB032545]              | 974.3   | 1 |
| Unknown                                                                              | 11150.1 | 1 |
| gb CHO_SL010xi12f1.ab1 CHO_SL Nicotiana tabacum cDNA, mRNA sequence [EH61            | 3224.87 | 1 |
| gb KF8B.100F20F.151010T7 KF8 Nicotiana tabacum cDNA clone KF8B.100F20, mRN           | 2803.87 | 1 |
| tc Rep: Chromosome chr12 scaffold_38, whole genome shotgun sequence - Vitis vi       | 152.36  | 1 |
| gb KR3B.113N05F.060119T7 KR3B Nicotiana tabacum cDNA clone KR3B.113N05, m            | 514.72  | 1 |
| tc Rep: Chromosome chr11 scaffold_56, whole genome shotgun sequence - Vitis vi       | 22.31   | 1 |
| gb CHO_SL020xp20f1.ab1 CHO_SL Nicotiana tabacum cDNA, mRNA sequence [EH6             | 142.9   | 1 |
| tc Rep: 2-oxoglutarate dehydrogenase E2 subunit - Arabidopsis thaliana (Mouse-ea     | 181.57  | 1 |
| gb KL4B.109A09F.051105T7 KL4B Nicotiana tabacum cDNA clone KL4B.109A09, mF           | 164.7   | 1 |
| gb BP531659 MAT005 Nicotiana tabacum cDNA clone BY25183, mRNA sequence [E            | 17.96   | 1 |
| Unknown                                                                              | 3437.2  | 1 |
| Unknown                                                                              | 134.55  | 1 |
| gb AGN_ELP009xm05f1.ab1 AGN_ELP Nicotiana tabacum cDNA 5', mRNA sequence             | 78.61   | 1 |
| tc Rep: Chromosome chr11 scaffold_56, whole genome shotgun sequence - Vitis vi       | 119.47  | 1 |
| tc Rep: Chromosome chr7 scaffold_20, whole genome shotgun sequence - Vitis vin       | 19.7    | 1 |
| gb Nicotiana tabacum NtYSL1 mRNA for putative yellow stripe-like protein, comple     | 151.65  | 1 |
| Unknown                                                                              | 23.69   | 1 |
| gb KP1B.102P18F.050722T7 KP1B Nicotiana tabacum cDNA clone KP1B.102P18, mF           | 822.31  | 1 |
| Unknown                                                                              | 64.95   | 1 |
| Unknown                                                                              | 507.86  | 1 |
| tc Rep: HSR203J - Nicotiana tabacum (Common tobacco), partial (59%) [TC48050]        | 28.52   | 1 |
| Unknown                                                                              | 27.77   | 1 |
| gb TOBESTR062H06 TOBEST cDNA library 1 Nicotiana tabacum cDNA 5', mRNA seq           | 18.93   | 1 |
| Unknown                                                                              | 428.13  | 1 |
| Unknown                                                                              | 106.59  | 1 |
| gb KP1B.102J04F.050722T7 KP1B Nicotiana tabacum cDNA clone KP1B.102J04, mR           | 127.78  | 1 |
| gb KT7C.108B12F.051219T7 KT7 Nicotiana tabacum cDNA clone KT7C.108B12, mR            | 1845.75 | 1 |
| Unknown                                                                              | 27.86   | 1 |
| gb KN6B.102L11F.051230T7 KN6B Nicotiana tabacum cDNA clone KN6B.102L11, m            | 152.12  | 1 |
| tc Rep: Gamma response I protein-like - Oryza sativa subsp. japonica (Rice), partial | 26.31   | 1 |
| tc Rep: Chromosome chr8 scaffold_23, whole genome shotgun sequence - Vitis vin       | 129.28  | 1 |
| tc Rep: CPD photolyase - Spinacia oleracea (Spinach), partial (30%) [TC50636]        | 496.47  | 1 |
| gb TT-35_B02 K326 early senescent leaf library Nicotiana tabacum cDNA, mRNA se       | 961.82  | 1 |



|                                                                                       |         |   |
|---------------------------------------------------------------------------------------|---------|---|
| Unknown                                                                               | 28.13   | 1 |
| gb KF8C.108H04F.051215T7 KF8 Nicotiana tabacum cDNA clone KF8C.108H04, mRNA           | 28.94   | 1 |
| Unknown                                                                               | 72.21   | 1 |
| gb KL5B.111M22F.060117T7 KL5B Nicotiana tabacum cDNA clone KL5B.111M22, mRNA          | 649.06  | 1 |
| gb Nicotiana tabacum mRNA for 14-3-3 f-1 protein, complete cds [AB119476]             | 18316.3 | 1 |
| Unknown                                                                               | 105.93  | 1 |
| Unknown                                                                               | 67.39   | 1 |
| tc Rep: Predicted protein - Physcomitrella patens subsp. patens, partial (9%) [TC594] | 517.9   | 1 |
| gb KG9B.102G14F.051126T7 KG9B Nicotiana tabacum cDNA clone KG9B.102G14, mRNA          | 668.46  | 1 |
| gb BP132748 MAT001 Nicotiana tabacum cDNA clone BY4943, mRNA sequence [BF132748]      | 18.26   | 1 |
| tc Rep: Molecular chaperone Hsp90-2 - Nicotiana benthamiana, partial (76%) [TC42]     | 871.66  | 1 |
| tc Rep: Cyc07 - Nicotiana tabacum (Common tobacco), partial (72%) [TC72415]           | 524.33  | 1 |
| gb KN6B.102A05F.051230T7 KN6B Nicotiana tabacum cDNA clone KN6B.102A05, mRNA          | 97.22   | 1 |
| tc Rep: Chromosome chr8 scaffold_29, whole genome shotgun sequence - Vitis vinifera   | 31.42   | 1 |
| gb CHO_SL017xj01f1.ab1 CHO_SL Nicotiana tabacum cDNA, mRNA sequence [EH61]            | 30.55   | 1 |
| Unknown                                                                               | 61.36   | 1 |
| tc Rep: Similarity - Yarrowia lipolytica (Candida lipolytica), partial (7%) [TC65945] | 375.72  | 1 |
| gb KL4B.102B04F.051125T7 KL4B Nicotiana tabacum cDNA clone KL4B.102B04, mRNA          | 18.85   | 1 |
| tc Rep: ribosomal protein L16 - Paramecium aurelia, partial (15%) [TC43985]           | 45.34   | 1 |
| Unknown                                                                               | 239.05  | 1 |
| gb AGN_RNC116xe20f1.ab1 AGN_RNC Nicotiana tabacum cDNA 5', mRNA sequence              | 19.23   | 1 |
| tc Rep: Chromosome undetermined scaffold_70, whole genome shotgun sequence            | 13968.6 | 1 |
| gb AGN_RPC027xk03f1.ab1 AGN_RPC Nicotiana tabacum cDNA 5', mRNA sequence              | 43.08   | 1 |
| Unknown                                                                               | 29.88   | 1 |
| Unknown                                                                               | 525.91  | 1 |
| Unknown                                                                               | 993.05  | 1 |
| gb N.tabacum NeIF-4A14 mRNA [X79141]                                                  | 8135.52 | 1 |
| Unknown                                                                               | 46.88   | 1 |
| gb KN6B.105K11F.060104T7 KN6B Nicotiana tabacum cDNA clone KN6B.105K11, mRNA          | 64.58   | 1 |
| tc Rep: Nucleobase-ascorbate transporter 6 - Arabidopsis thaliana (Mouse-ear cress)   | 58.92   | 1 |
| Unknown                                                                               | 61.03   | 1 |
| gb AGN_RNC021xj19f1.ab1 AGN_RNC Nicotiana tabacum cDNA 5', mRNA sequence              | 36.27   | 1 |
| gb KF8C.101O13F.051214T7 KF8 Nicotiana tabacum cDNA clone KF8C.101O13, mRNA           | 191.08  | 1 |
| gb Nicotiana tabacum cDNA-AFLP-fragment BSTT33-1-270, cultivar Bright Yellow 2        | 477.13  | 1 |

|                                                                                      |         |   |
|--------------------------------------------------------------------------------------|---------|---|
| gb AM832190 DL, diurnal library Nicotiana tabacum cDNA clone nt005007062, mR         | 35.43   | 1 |
| tc Rep: Chromosome chr1 scaffold_5, whole genome shotgun sequence - Vitis vinif      | 245.8   | 1 |
| tc Rep: Enolase - Solanum lycopersicum (Tomato) (Lycopersicon esculentum), parti     | 485.25  | 1 |
| gb TT-22_O05 K326 early senescent leaf library Nicotiana tabacum cDNA, mRNA se       | 44.31   | 1 |
| gb TL13.106C03F.060315T7 TL13 Nicotiana tabacum cDNA clone TL13.106C03, mRl          | 19.91   | 1 |
| gb TT-31_F05 Samsun trichome library Nicotiana tabacum cDNA, mRNA sequence           | 58.95   | 1 |
| gb Nicotiana tabacum sphingolipid delta-8 desaturase (DXDES) mRNA, complete cd       | 133.9   | 1 |
| Unknown                                                                              | 22.26   | 1 |
| gb KP1B.113H03F.060117T7 KP1B Nicotiana tabacum cDNA clone KP1B.113H03, m            | 19.04   | 1 |
| gb CHO_SL025xe13f1.ab1 CHO_SL Nicotiana tabacum cDNA, mRNA sequence [EH6             | 155.13  | 1 |
| tc Rep: 101 kDa heat shock protein - Nicotiana tabacum (Common tobacco), partial     | 73.43   | 1 |
| Unknown                                                                              | 48.27   | 1 |
| Unknown                                                                              | 54.63   | 1 |
| tc Rep: TPS11 - Solanum lycopersicum (Tomato) (Lycopersicon esculentum), partial     | 56.03   | 1 |
| Unknown                                                                              | 35.96   | 1 |
| gb Tabacco Cab21 mRNA for major chlorophyll a [X52743]                               | 26.54   | 1 |
| gb KT7C.102H09F.051216T7 KT7 Nicotiana tabacum cDNA clone KT7C.102H09, mRl           | 1250.83 | 1 |
| gb AGN_RNC211xf07f1.ab1 AGN_RNC Nicotiana tabacum cDNA 5', mRNA sequenc              | 2726.88 | 1 |
| Unknown                                                                              | 208.93  | 1 |
| Unknown                                                                              | 47.59   | 1 |
| Unknown                                                                              | 46.64   | 1 |
| gb Nicotiana tabacum calcium-dependent protein kinase CDPK5 (CDPK5) mRNA, co         | 57.49   | 1 |
| gb AGN_RNC020xa07f1.ab1 AGN_RNC Nicotiana tabacum cDNA 5', mRNA sequenc              | 22.5    | 1 |
| Unknown                                                                              | 36.7    | 1 |
| Unknown                                                                              | 763.67  | 1 |
| tc Rep: Peptidyl-prolyl cis-trans isomerase - Solanum tuberosum (Potato), partial (9 | 516.59  | 1 |
| tc Rep: Enod93 protein - Sonneratia alba, partial (80%) [TC68459]                    | 27.62   | 1 |
| gb AGN_ELP024xp15f1.ab1 AGN_ELP Nicotiana tabacum cDNA 5', mRNA sequence             | 18.97   | 1 |
| gb KF8C.103L11F.051214T7 KF8 Nicotiana tabacum cDNA clone KF8C.103L11, mRN           | 26.49   | 1 |
| gb KR3B.108F08F.051110T7 KR3B Nicotiana tabacum cDNA clone KR3B.108F08, mF           | 87.45   | 1 |
| tc Rep: Methylenetetrahydrofolate reductase - Vitis vinifera (Grape), partial (34%)  | 1233.47 | 1 |
| tc Rep: Hydroxyacylglutathione hydrolase cytoplasmic-like - Solanum tuberosum (P     | 25.12   | 1 |
| tc Rep: Chromosome chr6 scaffold_3, whole genome shotgun sequence - Vitis vinif      | 25.37   | 1 |
| gb KP1B.101C11F.050722T7 KP1B Nicotiana tabacum cDNA clone KP1B.101C11, ml           | 32.07   | 1 |

|                                                                                      |          |   |
|--------------------------------------------------------------------------------------|----------|---|
| Unknown                                                                              | 21.76    | 1 |
| tc Rep: Pyruvate kinase - Arabidopsis thaliana (Mouse-ear cress), partial (84%) [TC5 | 62.95    | 1 |
| gb TOBESTR030H01 TOBEST cDNA library 1 Nicotiana tabacum cDNA 5', mRNA seq           | 36.16    | 1 |
| Unknown                                                                              | 19.01    | 1 |
| Unknown                                                                              | 25.24    | 1 |
| Unknown                                                                              | 21.67    | 1 |
| gb KF8B.100B22F.151010T7 KF8 Nicotiana tabacum cDNA clone KF8B.100B22, mRN           | 21.88    | 1 |
| gb AGN_RNC118xn10r1.ab1 AGN_RNC Nicotiana tabacum cDNA 3', mRNA sequenc              | 78.44    | 1 |
| tc Rep: Chromosome chr1 scaffold_46, whole genome shotgun sequence - Vitis vin       | 46.46    | 1 |
| Unknown                                                                              | 11392    | 1 |
| gb KR3B.106J18F.051109T7 KR3B Nicotiana tabacum cDNA clone KR3B.106J18, mR           | 183.16   | 1 |
| gb AGN_PNL228ar1_h4.trimmed.seq AGN_PNL Nicotiana tabacum cDNA 3', mRNA              | 71.4     | 1 |
| tc Rep: Transcription factor JERF1 - Solanum lycopersicum (Tomato) (Lycopersicon     | 1032.99  | 1 |
| gb EST_CSP005xf15f1.ab1 EST_CSP Nicotiana tabacum cDNA, mRNA sequence [EH            | 87.41    | 1 |
| Unknown                                                                              | 553.71   | 1 |
| tc Rep: 4D11_4 - Brassica rapa subsp. pekinensis (Chinese cabbage), partial (26%) [1 | 39.23    | 1 |
| tc Rep: Chloroplast heavy metal P-type ATPase precursor - Arabidopsis thaliana (M    | 1176.03  | 1 |
| Unknown                                                                              | 61.67    | 1 |
| tc Rep: Ribosomal protein S10, eukaryotic and archaeal form - Medicago truncatula    | 505.74   | 1 |
| Unknown                                                                              | 1806.08  | 1 |
| Unknown                                                                              | 22.31    | 1 |
| tc Rep: Chromosome chr2 scaffold_196, whole genome shotgun sequence - Vitis vi       | 221.15   | 1 |
| Unknown                                                                              | 246.7    | 1 |
| Unknown                                                                              | 32.09    | 1 |
| Unknown                                                                              | 37.07    | 1 |
| tc Rep: Ferrochelatase - Vitis vinifera (Grape), partial (16%) [TC55575]             | 228.42   | 1 |
| gb AGN_RNC127xi20f1.ab1 AGN_RNC Nicotiana tabacum cDNA 5', mRNA sequenc              | 86.47    | 1 |
| tc Rep: ATP synthase subunit d, mitochondrial - Arabidopsis thaliana (Mouse-ear cr   | 2877.03  | 1 |
| gb Nicotiana tabacum NtLCB2 mRNA for serine palmitoyltransferase subunit2, coi       | 11712.05 | 1 |
| Unknown                                                                              | 21.26    | 1 |
| tc Rep: Chromosome chr14 scaffold_9, whole genome shotgun sequence - Vitis vin       | 528.37   | 1 |
| gb N.tabacum mRNA for glutamate-1-semialdehyde aminotransferase [X65974]             | 20.32    | 1 |
| Unknown                                                                              | 2430.15  | 1 |
| tc Rep: Ascorbate peroxidase - Capsicum annuum (Bell pepper), complete [TC4715:      | 1167.33  | 1 |

|                                                                                      |          |   |
|--------------------------------------------------------------------------------------|----------|---|
| gb KG9B.002B01F.050720T7 KG9B Nicotiana tabacum cDNA clone KG9B.002B01, r            | 213.33   | 1 |
| tc Rep: Superoxide dismutase [Mn], mitochondrial precursor - Capsicum annuum (f      | 263.03   | 1 |
| gb FS416927 normalized full-length tobacco cDNA library Nicotiana tabacum cDNA       | 2913.01  | 1 |
| Unknown                                                                              | 33.58    | 1 |
| gb TT-24_A21 K326 trichome library Nicotiana tabacum cDNA, mRNA sequence [FC         | 607.04   | 1 |
| tc Rep: Endoglucanase-like protein - Saccharophagus degradans (strain 2-40 / ATCC    | 92.49    | 1 |
| gb N.tabacum mRNA for GTP-binding protein, SAR1 [X97967]                             | 7095.38  | 1 |
| tc Rep: Metallothionein-like protein type 2 - Nicotiana plumbaginifolia (Leadwort-lk | 48.06    | 1 |
| gb KF8B.100M11F.051010T7 KF8 Nicotiana tabacum cDNA clone KF8B.100M11, mF            | 170.99   | 1 |
| gb KR3B.101A06F.051107T7 KR3B Nicotiana tabacum cDNA clone KR3B.101A06, m            | 43.95    | 1 |
| tc Rep: Glycoprotein-like protein - Solanum tuberosum (Potato), partial (55%) [TC6   | 33.74    | 1 |
| Unknown                                                                              | 101      | 1 |
| gb AGN_ELP024xf21f1.ab1 AGN_ELP Nicotiana tabacum cDNA 5', mRNA sequence             | 61.1     | 1 |
| Unknown                                                                              | 74.62    | 1 |
| tc Rep: Chromosome undetermined scaffold_69, whole genome shotgun sequence           | 127.84   | 1 |
| tc Rep: Ubiquitin activating enzyme 2 - Nicotiana tabacum (Common tobacco), corr     | 226.5    | 1 |
| Unknown                                                                              | 265.94   | 1 |
| tc Rep: Chromosome undetermined scaffold_222, whole genome shotgun sequenc           | 31.84    | 1 |
| gb AGN_RNC116xi22f1.ab1 AGN_RNC Nicotiana tabacum cDNA 5', mRNA sequenc              | 61.92    | 1 |
| gb KR3B.110G23F.051111T7 KR3B Nicotiana tabacum cDNA clone KR3B.110G23, m            | 1303.8   | 1 |
| Unknown                                                                              | 640.3    | 1 |
| Unknown                                                                              | 74.11    | 1 |
| gb CHO_SL004xn19f1.ab1 CHO_SL Nicotiana tabacum cDNA, mRNA sequence [EH6             | 86.92    | 1 |
| gb KL4B.108P15F.051105T7 KL4B Nicotiana tabacum cDNA clone KL4B.108P15, mR           | 35.95    | 1 |
| tc Rep: Chromosome chr7 scaffold_20, whole genome shotgun sequence - Vitis vin       | 25.43    | 1 |
| gb KT7B.100A12F.051010T7 KT7 Nicotiana tabacum cDNA clone KT7B.100A12, mRl           | 257.91   | 1 |
| gb AGN_RNC025xb07f1.ab1 AGN_RNC Nicotiana tabacum cDNA 5', mRNA sequenc              | 103.42   | 1 |
| gb KG9B.005C06F.050721T7 KG9B Nicotiana tabacum cDNA clone KG9B.005C06, r            | 26.6     | 1 |
| gb KF8C.102B01F.051214T7 KF8 Nicotiana tabacum cDNA clone KF8C.102B01, mRN           | 96.89    | 1 |
| gb KP1B.111O22F.060116T7 KP1B Nicotiana tabacum cDNA clone KP1B.111O22, m            | 191.87   | 1 |
| gb Nicotiana tabacum S-adenosylmethionine synthase mRNA, complete cds [AF321         | 18678.15 | 1 |
| gb KP1B.101E15F.050722T7 KP1B Nicotiana tabacum cDNA clone KP1B.101E15, mF           | 66.98    | 1 |
| gb KL4B.101I19F.051103T7 KL4B Nicotiana tabacum cDNA clone KL4B.101I19, mRN          | 20.64    | 1 |
| Unknown                                                                              | 403.87   | 1 |

|                                                                                      |         |   |
|--------------------------------------------------------------------------------------|---------|---|
| gb KG9B.105F07F.051128T7 KG9B Nicotiana tabacum cDNA clone KG9B.105F07, m            | 41.85   | 1 |
| gb KL4B.107F01F.051126T7 KL4B Nicotiana tabacum cDNA clone KL4B.107F01, mR           | 91.66   | 1 |
| gb AGN_RNC026xj02f1.ab1 AGN_RNC Nicotiana tabacum cDNA 5', mRNA sequenc              | 1163.15 | 1 |
| tc Rep: Chromosome chr5 scaffold_58, whole genome shotgun sequence - Vitis vin       | 2521.32 | 1 |
| gb KT7C.108F18F.051219T7 KT7 Nicotiana tabacum cDNA clone KT7C.108F18, mRN           | 594.73  | 1 |
| tc Rep: Chromosome undetermined scaffold_257, whole genome shotgun sequenc           | 115.39  | 1 |
| Unknown                                                                              | 23.55   | 1 |
| Unknown                                                                              | 33.32   | 1 |
| gb KP1B.110K21F.050727T7 KP1B Nicotiana tabacum cDNA clone KP1B.110K21, mI           | 25.47   | 1 |
| tc Rep: Chromosome undetermined scaffold_53, whole genome shotgun sequence           | 48.98   | 1 |
| gb Nicotiana tabacum peptidyl-prolyl cis [EF051139]                                  | 33      | 1 |
| gb Nicotiana tabacum calcium [AF435452]                                              | 92.66   | 1 |
| tc Rep: Chromosome chr11 scaffold_13, whole genome shotgun sequence - Vitis vi       | 57.37   | 1 |
| tc Rep: Ubiquitin carrier protein - Nicotiana benthamiana, complete [TC50166]        | 127.65  | 1 |
| Unknown                                                                              | 20.85   | 1 |
| Unknown                                                                              | 22.76   | 1 |
| tc Rep: Chromosome chr12 scaffold_47, whole genome shotgun sequence - Vitis vi       | 532.1   | 1 |
| gb EST_FLW001xa18f1.ab1 EST_FLW Nicotiana tabacum cDNA, mRNA sequence [Ei            | 649.7   | 1 |
| Unknown                                                                              | 40292.5 | 1 |
| tc Rep: Predicted protein - Physcomitrella patens subsp. patens, partial (32%) [TC48 | 85.2    | 1 |
| Unknown                                                                              | 260.1   | 1 |
| Unknown                                                                              | 1536.5  | 1 |
| Unknown                                                                              | 227.04  | 1 |
| tc Rep: Progesterone 5beta-reductase - Isoplexis chalcantha, partial (47%) [TC4716   | 2549.3  | 1 |
| tc Rep: Chromosome chr6 scaffold_3, whole genome shotgun sequence - Vitis vinif      | 1569.92 | 1 |
| Unknown                                                                              | 99.94   | 1 |
| gb AM821017 seedling library, SL Nicotiana tabacum cDNA clone nt002264067, mF        | 147.26  | 1 |
| gb KF8B.200C17F.060120T7 KF8 Nicotiana tabacum cDNA clone KF8B.200C17, mRN           | 527.88  | 1 |
| tc Rep: Chromosome chr4 scaffold_6, whole genome shotgun sequence - Vitis vinif      | 49.35   | 1 |
| gb Nicotiana tabacum mRNA for 14-3-3 i-1 protein, complete cds [AB119480]            | 492.01  | 1 |
| gb CHO_SL023xa21f1.ab1 CHO_SL Nicotiana tabacum cDNA, mRNA sequence [EH6             | 498.23  | 1 |
| Unknown                                                                              | 34.83   | 1 |
| tc Rep: Beta-carbonic anhydrase - Nicotiana tabacum (Common tobacco), complet        | 824.97  | 1 |
| gb AGN_ELP006xn23f1.ab1 AGN_ELP Nicotiana tabacum cDNA 5', mRNA sequence             | 71.98   | 1 |

|                                                                                       |          |   |
|---------------------------------------------------------------------------------------|----------|---|
| tc Rep: Fumarate hydratase - Synechococcus sp. WH 5701, partial (4%) [TC45005]        | 18.24    | 1 |
| gb CHO_SL016xb13f1.ab1 CHO_SL Nicotiana tabacum cDNA, mRNA sequence [EH6              | 21.73    | 1 |
| gb EST_FLW001xl23f1.ab1 EST_FLW Nicotiana tabacum cDNA, mRNA sequence [E-             | 760.41   | 1 |
| gb BL12.001G14F.060117T7 BL12 Nicotiana tabacum cDNA clone BL12.001G14, mF            | 552.47   | 1 |
| Unknown                                                                               | 24.2     | 1 |
| tc Rep: Pyrophosphate--fructose 6-phosphate 1-phosphotransferase subunit alpha        | 185.72   | 1 |
| gb TT-17_K11 K326 early senescent leaf library Nicotiana tabacum cDNA, mRNA se        | 71.41    | 1 |
| tc Rep: Chromosome chr5 scaffold_124, whole genome shotgun sequence - Vitis vi        | 32.18    | 1 |
| gb AGN_RNC017xc21f1.ab1 AGN_RNC Nicotiana tabacum cDNA 5', mRNA sequenc               | 32.22    | 1 |
| Unknown                                                                               | 58.57    | 1 |
| tc Rep: DNAJ heat shock protein - Nicotiana tabacum (Common tobacco), partial (9      | 155.07   | 1 |
| gb AM828280 seedling library, SL Nicotiana tabacum cDNA clone nt002181074, mF         | 98.86    | 1 |
| gb AGN_RPC011xi02f1.ab1 AGN_RPC Nicotiana tabacum cDNA 5', mRNA sequence              | 136.04   | 1 |
| Unknown                                                                               | 79.83    | 1 |
| gb AGN_RNC025xl24f1.ab1 AGN_RNC Nicotiana tabacum cDNA 5', mRNA sequenc               | 497.32   | 1 |
| Unknown                                                                               | 37.07    | 1 |
| tc Rep: Thiosulfate sulfurtransferase - Datisca glomerata (Durango root), partial (84 | 30.99    | 1 |
| Unknown                                                                               | 29.78    | 1 |
| gb N.tabacum mRNA for cyclin A-like protein (clone 30) [X92967]                       | 56.34    | 1 |
| gb N.tabacum mRNA for PRT1 protein [Y11996]                                           | 136.28   | 1 |
| Unknown                                                                               | 267.08   | 1 |
| gb KR3B.103O02F.051108T7 KR3B Nicotiana tabacum cDNA clone KR3B.103O02, m             | 456.17   | 1 |
| Unknown                                                                               | 35.57    | 1 |
| gb Nicotiana tabacum mRNA for glyceraldehyde-3-phosphate dehydrogenase [AJ1:          | 517.03   | 1 |
| gb KG9B.005H16F.050721T7 KG9B Nicotiana tabacum cDNA clone KG9B.005H16, n             | 30.96    | 1 |
| gb FS429628 normalized full-length tobacco cDNA library Nicotiana tabacum cDNA        | 10740.45 | 1 |
| gb KT7C.110G02F.051221T7 KT7 Nicotiana tabacum cDNA clone KT7C.110G02, mR             | 119.41   | 1 |
| tc Rep: Chromosome undetermined scaffold_221, whole genome shotgun sequenc            | 324.19   | 1 |
| gb Nicotiana tabacum B37 mRNA for MCM protein-like protein, complete cds [AB0         | 21.12    | 1 |
| tc Rep: ATP-dependent Clp protease ATP-binding subunit clpA homolog CD4B, chlo        | 62.5     | 1 |
| tc Rep: Chromosome undetermined scaffold_55, whole genome shotgun sequence            | 144.41   | 1 |
| gb AGN_RNC021xj15f1.ab1 AGN_RNC Nicotiana tabacum cDNA 5', mRNA sequenc               | 26.37    | 1 |
| gb KG9B.106G24F.051129T7 KG9B Nicotiana tabacum cDNA clone KG9B.106G24, n             | 80.61    | 1 |
| tc Rep: Chromosome chr2 scaffold_132, whole genome shotgun sequence - Vitis vi        | 812.59   | 1 |

|                                                                                                    |          |   |
|----------------------------------------------------------------------------------------------------|----------|---|
| tc Rep: Chromosome chr6 scaffold_3, whole genome shotgun sequence - Vitis vinifera                 | 27.03    | 1 |
| tc Rep: F3O9.16 - Arabidopsis thaliana (Mouse-ear cress), partial (48%) [TC63404]                  | 163.4    | 1 |
| tc Rep: Fiber protein Fb12 - Gossypium barbadense (Sea-island cotton) (Egyptian cotton)            | 1727.93  | 1 |
| Unknown                                                                                            | 995.84   | 1 |
| tc Rep: Chromosome chr2 scaffold_112, whole genome shotgun sequence - Vitis vinifera               | 46263.35 | 1 |
| tc Rep: DNA binding protein homolog - Solanum tuberosum (Potato), partial (13%)                    | 80.46    | 1 |
| tc Rep: Methylmalonate-semialdehyde dehydrogenase [acylating], mitochondrial protein               | 125.73   | 1 |
| gb TT-24_M03 K326 trichome library Nicotiana tabacum cDNA, mRNA sequence [F01103]                  | 133.79   | 1 |
| gb TT-31_B14 K326 trichome library Nicotiana tabacum cDNA, mRNA sequence [F01103]                  | 134.25   | 1 |
| gb TT-18_E11 K326 early senescent leaf library Nicotiana tabacum cDNA, mRNA sequence [F01103]      | 23.25    | 1 |
| tc Rep: Protein phosphatase 2C - Solanum lycopersicum (Tomato) (Lycopersicon esculentum)           | 249.88   | 1 |
| Unknown                                                                                            | 26.56    | 1 |
| gb Nicotiana tabacum Fas-associated factor-like protein mRNA, partial cds [AY740518]               | 209.36   | 1 |
| gb KP1B.001N23F.050628T7 KP1B Nicotiana tabacum cDNA clone KP1B.001N23, mRNA sequence [F01103]     | 31983.1  | 1 |
| tc Rep: F-ATPase family transporter: protons - Ostreococcus lucimarinus (strain CC1000)            | 23.42    | 1 |
| gb KP1B.109P05F.050727T7 KP1B Nicotiana tabacum cDNA clone KP1B.109P05, mRNA sequence [F01103]     | 61.44    | 1 |
| gb KL4B.101J19F.051103T7 KL4B Nicotiana tabacum cDNA clone KL4B.101J19, mRNA sequence [F01103]     | 77.57    | 1 |
| tc Rep: Cellulose synthase 3 - Eucalyptus grandis (Flooded gum), partial (58%) [TC63404]           | 502.04   | 1 |
| Unknown                                                                                            | 124.81   | 1 |
| Unknown                                                                                            | 1926.15  | 1 |
| gb KF8C.102H19F.051214T7 KF8 Nicotiana tabacum cDNA clone KF8C.102H19, mRNA sequence [F01103]      | 57.29    | 1 |
| gb AM819908 DL, diurnal library Nicotiana tabacum cDNA clone nt005005087, mRNA sequence [F01103]   | 79.97    | 1 |
| gb Nicotiana tabacum cinnamyl alcohol dehydrogenase 1 (CAD1-7) mRNA, complete cds [F01103]         | 986.55   | 1 |
| tc Rep: Predicted protein - Physcomitrella patens subsp. patens, partial (90%) [TC63404]           | 99.17    | 1 |
| tc Rep: Chromosome undetermined scaffold_448, whole genome shotgun sequence - Arabidopsis thaliana | 264.85   | 1 |
| gb AGN_PNL227af1_d11.trimmed.seq AGN_PNL Nicotiana tabacum cDNA 5', mRNA sequence [F01103]         | 36.28    | 1 |
| tc Rep: 40S ribosomal protein S15-like - Solanum tuberosum (Potato), complete cds [F01103]         | 111.03   | 1 |
| gb KT7C.104K01F.051219T7 KT7 Nicotiana tabacum cDNA clone KT7C.104K01, mRNA sequence [F01103]      | 2762.76  | 1 |
| gb BP130751 MAT001 Nicotiana tabacum cDNA clone BY2751, mRNA sequence [F01103]                     | 41.23    | 1 |
| tc Rep: Chromosome undetermined scaffold_235, whole genome shotgun sequence - Arabidopsis thaliana | 55.75    | 1 |
| gb CHO_SL009xf05f1.ab1 CHO_SL Nicotiana tabacum cDNA, mRNA sequence [EH63404]                      | 977.39   | 1 |
| Unknown                                                                                            | 236.7    | 1 |
| Unknown                                                                                            | 26.13    | 1 |
| gb KF8C.106G12F.051215T7 KF8 Nicotiana tabacum cDNA clone KF8C.106G12, mRNA sequence [F01103]      | 443.54   | 1 |

|                                                                                               |         |   |
|-----------------------------------------------------------------------------------------------|---------|---|
| gb TT-01_A03 Burley21 trichome library Nicotiana tabacum cDNA, mRNA sequence                  | 679.89  | 1 |
| Unknown                                                                                       | 28.12   | 1 |
| gb KG9B.103D08F.051128T7 KG9B Nicotiana tabacum cDNA clone KG9B.103D08, n                     | 362.26  | 1 |
| tc Rep: Phosphosulfolactate synthase-related protein - Solanum lycopersicum (Tomato)          | 309.78  | 1 |
| gb N.tabacum mRNA for cyclin A-like protein (clone 19) [X92966]                               | 46.19   | 1 |
| Unknown                                                                                       | 23.66   | 1 |
| tc Rep: Chromosome chr6 scaffold_3, whole genome shotgun sequence - Vitis vinifera            | 410.59  | 1 |
| Unknown                                                                                       | 256.96  | 1 |
| gb CHO_SL014xb10f1.ab1 CHO_SL Nicotiana tabacum cDNA, mRNA sequence [EH666666]                | 1054.03 | 1 |
| Unknown                                                                                       | 78.06   | 1 |
| gb KG9B.001B21F.050628T7 KG9B Nicotiana tabacum cDNA clone KG9B.001B21, r                     | 185.61  | 1 |
| gb KG9B.003B22F.050720T7 KG9B Nicotiana tabacum cDNA clone KG9B.003B22, r                     | 132.02  | 1 |
| gb KF8B.201A07F.060124T7 KF8 Nicotiana tabacum cDNA clone KF8B.201A07, mR                     | 21.4    | 1 |
| tc Rep: Chromosome chr5 scaffold_64, whole genome shotgun sequence - Vitis vinifera           | 34.82   | 1 |
| gb KG9B.103P09F.051128T7 KG9B Nicotiana tabacum cDNA clone KG9B.103P09, m                     | 322.27  | 1 |
| gb TT-41_F01 K326 late senescent leaf library Nicotiana tabacum cDNA, mRNA seq                | 35.71   | 1 |
| Unknown                                                                                       | 52.92   | 1 |
| tc Rep: Chromosome chr2 scaffold_11, whole genome shotgun sequence - Vitis vinifera           | 40.23   | 1 |
| Unknown                                                                                       | 32.6    | 1 |
| Unknown                                                                                       | 62.53   | 1 |
| tc Rep: Chromosome chr15 scaffold_40, whole genome shotgun sequence - Vitis vinifera          | 1032.46 | 1 |
| Unknown                                                                                       | 18.96   | 1 |
| gb Nicotiana tabacum clone D222-BH4 CYP71AU1 mRNA, complete cds [DQ350357]                    | 92.43   | 1 |
| gb KP1B.101O10F.050722T7 KP1B Nicotiana tabacum cDNA clone KP1B.101O10, m                     | 513.57  | 1 |
| Unknown                                                                                       | 245.98  | 1 |
| tc Rep: Chromosome chr3 scaffold_8, whole genome shotgun sequence - Vitis vinifera            | 2865.6  | 1 |
| tc Rep: Chromosome chr6 scaffold_3, whole genome shotgun sequence - Vitis vinifera            | 32.39   | 1 |
| tc Rep: Chromosome undetermined scaffold_298, whole genome shotgun sequence - Vitis vinifera  | 45.56   | 1 |
| tc Rep: Ribulose-5-phosphate-3-epimerase - Pisum sativum (Garden pea), partial (90%) [U00000] | 192.02  | 1 |
| tc Rep: AML1 - Medicago truncatula (Barrel medic), partial (38%) [TC58030]                    | 69.96   | 1 |
| gb KR3B.114P19F.060119T7 KR3B Nicotiana tabacum cDNA clone KR3B.114P19, m                     | 226.36  | 1 |
| Unknown                                                                                       | 20.76   | 1 |
| gb AGN_RPC015xi19f1.ab1 AGN_RPC Nicotiana tabacum cDNA 5', mRNA sequence                      | 28.12   | 1 |
| gb FS391824 normalized full-length tobacco cDNA library Nicotiana tabacum cDNA                | 32.25   | 1 |



|                                                                                              |         |   |
|----------------------------------------------------------------------------------------------|---------|---|
| Unknown                                                                                      | 61.74   | 1 |
| tc Rep: Predicted protein - Chlamydomonas reinhardtii, partial (5%) [TC56158]                | 514.51  | 1 |
| tc Rep: MYB-CC type transfactor - Solanum tuberosum (Potato), partial (89%) [TC56158]        | 469.89  | 1 |
| gb AGN_RPC007xg16f1.ab1 AGN_RPC Nicotiana tabacum cDNA 5', mRNA sequence                     | 48.24   | 1 |
| Unknown                                                                                      | 2986.99 | 1 |
| tc LERYGTOM5 L.esculentum (rY mutant) GTOM5 mRNA for mutant phytoene synthase                | 25.72   | 1 |
| gb AGN_ELP008xn07f1.ab1 AGN_ELP Nicotiana tabacum cDNA 5', mRNA sequence                     | 79.95   | 1 |
| gb KP1B.107P23F.050726T7 KP1B Nicotiana tabacum cDNA clone KP1B.107P23, mRNA sequence        | 1116.21 | 1 |
| gb BP135456 MAT001 Nicotiana tabacum cDNA clone BY7971, mRNA sequence [BF135456]             | 23.18   | 1 |
| Unknown                                                                                      | 19.09   | 1 |
| gb Nicotiana tabacum callus associated protein (CAP) mRNA, partial cds [U01961]              | 45.03   | 1 |
| gb KF8C.101E15F.051214T7 KF8 Nicotiana tabacum cDNA clone KF8C.101E15, mRNA sequence         | 1206.88 | 1 |
| Unknown                                                                                      | 44.82   | 1 |
| tc Rep: Glycine dehydrogenase [decarboxylating], mitochondrial precursor - Solanum tuberosum | 15693.2 | 1 |
| Unknown                                                                                      | 7930.03 | 1 |
| Unknown                                                                                      | 42.28   | 1 |
| gb Nicotiana tabacum Avr9 [AF211537]                                                         | 624.3   | 1 |
| gb KP1B.107F16F.050726T7 KP1B Nicotiana tabacum cDNA clone KP1B.107F16, mRNA sequence        | 1755.19 | 1 |
| Unknown                                                                                      | 41.23   | 1 |
| gb AGN_PNL224bf1_d7.trimmed.seq AGN_PNL Nicotiana tabacum cDNA 5', mRNA sequence             | 60.95   | 1 |
| Unknown                                                                                      | 18.23   | 1 |
| tc Rep: Common plant regulatory factor 7 - Petroselinum crispum (Parsley) (Petroselinum)     | 1044.3  | 1 |
| gb TT-04_C17 K326 trichome library Nicotiana tabacum cDNA, mRNA sequence [FG63]              | 4747.74 | 1 |
| gb TL13.102D10F.060313T7 TL13 Nicotiana tabacum cDNA clone TL13.102D10, mRNA sequence        | 232.38  | 1 |
| tc Rep: Chromosome chr8 scaffold_29, whole genome shotgun sequence - Vitis vinifera          | 68.94   | 1 |
| tc Rep: Ribulose-5-phosphate-3-epimerase - Pisum sativum (Garden pea), partial (90%)         | 135.3   | 1 |
| Unknown                                                                                      | 28.73   | 1 |
| tc Rep: Ran binding protein - Nicotiana benthamiana, partial (89%) [TC70300]                 | 85.05   | 1 |
| Unknown                                                                                      | 43.25   | 1 |
| tc Rep: Tubby-like F-box protein 7 - Arabidopsis thaliana (Mouse-ear cress), partial         | 71.93   | 1 |
| tc Rep: 26S proteasome regulatory particle non-ATPase subunit5 - Oryza sativa subunit5       | 534.03  | 1 |
| gb 3H05 Transformed tobacco Lambda Zap II library Nicotiana tabacum cDNA 5', mRNA sequence   | 59.33   | 1 |
| tc Rep: Chromosome chr1 scaffold_5, whole genome shotgun sequence - Vitis vinifera           | 97.55   | 1 |
| gb TT-09_F08 tobacco leaf library Nicotiana tabacum cDNA, mRNA sequence [FG63]               | 41.63   | 1 |

|                                                                                                         |         |   |
|---------------------------------------------------------------------------------------------------------|---------|---|
| tc Rep: Ribosomal protein L11-like - <i>Nicotiana tabacum</i> (Common tobacco), complete cds            | 176.92  | 1 |
| tc Rep: Adenylate kinase family-like protein - <i>Solanum tuberosum</i> (Potato), partial cds           | 615.47  | 1 |
| tc Rep: Peptidyl-prolyl cis-trans isomerase - <i>Vitis vinifera</i> (Grape), partial (82%) [TC60543]    | 505.41  | 1 |
| Unknown                                                                                                 | 1617.05 | 1 |
| tc Rep: Cyc07 - <i>Nicotiana tabacum</i> (Common tobacco), partial (72%) [TC72415]                      | 756.43  | 1 |
| gb KP1B.101J04F.050722T7 KP1B <i>Nicotiana tabacum</i> cDNA clone KP1B.101J04, mRNA                     | 29.73   | 1 |
| gb KG9B.104P06F.060120T7 KG9B <i>Nicotiana tabacum</i> cDNA clone KG9B.104P06, mRNA                     | 226.08  | 1 |
| gb AGN_RNC021xm19f1.ab1 AGN_RNC <i>Nicotiana tabacum</i> cDNA 5', mRNA sequence                         | 24.64   | 1 |
| tc Rep: PRP38 - <i>Medicago truncatula</i> (Barrel medic), partial (90%) [TC60543]                      | 443.5   | 1 |
| gb AGN_RNC114xb17f1.ab1 AGN_RNC <i>Nicotiana tabacum</i> cDNA 5', mRNA sequence                         | 365.24  | 1 |
| tc Rep: Ubiquitin carrier protein - <i>Mesembryanthemum crystallinum</i> (Common ice plant)             | 8953.59 | 1 |
| tc Rep: Chromosome chr2 scaffold_132, whole genome shotgun sequence - <i>Vitis vinifera</i>             | 27.11   | 1 |
| gb AGN_RNC007xc16f1.ab1 AGN_RNC <i>Nicotiana tabacum</i> cDNA 5', mRNA sequence                         | 489.32  | 1 |
| gb AM809125 seedling library, SL <i>Nicotiana tabacum</i> cDNA clone nt002125036, mRNA                  | 503.16  | 1 |
| tc Rep: YUP8H12R.36 - <i>Arabidopsis thaliana</i> (Mouse-ear cress), partial (9%) [TC5021]              | 32.02   | 1 |
| tc Rep: Chlorophyll a-b binding protein 7, chloroplast precursor - <i>Solanum lycopersicon</i>          | 78.56   | 1 |
| tc Rep: Small basic intrinsic protein 1 - <i>Vitis vinifera</i> (Grape), partial (76%) [TC70667]        | 26.15   | 1 |
| tc Rep: Chromosome chr1 scaffold_46, whole genome shotgun sequence - <i>Vitis vinifera</i>              | 64.68   | 1 |
| tc Rep: Per1-like family protein - <i>Solanum tuberosum</i> (Potato), partial (97%) [TC40543]           | 32.41   | 1 |
| gb KG9B.004H05F.050721T7 KG9B <i>Nicotiana tabacum</i> cDNA clone KG9B.004H05, mRNA                     | 25.23   | 1 |
| Unknown                                                                                                 | 44.28   | 1 |
| tc Rep: Chromosome chr17 scaffold_16, whole genome shotgun sequence - <i>Vitis vinifera</i>             | 180.61  | 1 |
| gb N.tabacum npp1 mRNA for protein phosphatase type 1 [Z93768]                                          | 2622.26 | 1 |
| Unknown                                                                                                 | 34.32   | 1 |
| tc Rep: Predicted protein - <i>Physcomitrella patens</i> subsp. <i>patens</i> , partial (40%) [TC43627] | 2870.93 | 1 |
| gb AGN_RNC021xp22f1.ab1 AGN_RNC <i>Nicotiana tabacum</i> cDNA 5', mRNA sequence                         | 26.03   | 1 |
| tc Rep: P40-like protein - <i>Solanum tuberosum</i> (Potato), partial (93%) [TC43627]                   | 36.77   | 1 |
| gb  <i>Nicotiana tabacum</i> UDP-glucuronate decarboxylase 1 mRNA, complete cds [AY60543]               | 1454.72 | 1 |
| Unknown                                                                                                 | 547.58  | 1 |
| gb KR3B.106B02F.051109T7 KR3B <i>Nicotiana tabacum</i> cDNA clone KR3B.106B02, mRNA                     | 387.95  | 1 |
| tc Rep: Hexaprenyldihydroxybenzoate methyltransferase, mitochondrial precursor                          | 128.9   | 1 |
| Unknown                                                                                                 | 2822.87 | 1 |
| gb KL4B.108M21F.051105T7 KL4B <i>Nicotiana tabacum</i> cDNA clone KL4B.108M21, mRNA                     | 41.3    | 1 |
| tc Rep: Histone deacetylase HDT1 - <i>Solanum chacoense</i> (Chaco potato), partial (88%)               | 78.46   | 1 |

|                                                                                      |         |   |
|--------------------------------------------------------------------------------------|---------|---|
| tc Rep: Predicted protein - Chlamydomonas reinhardtii, partial (12%) [TC75316]       | 248.37  | 1 |
| gb TL13.101G08F.060313T7 TL13 Nicotiana tabacum cDNA clone TL13.101G08, mR           | 1988.4  | 1 |
| tc Rep: Probable U6 snRNA-associated Sm-like protein LSm4 - Nicotiana tabacum (C     | 271.66  | 1 |
| gb KP1B.112B14F.060117T7 KP1B Nicotiana tabacum cDNA clone KP1B.112B14, mI           | 39.46   | 1 |
| tc Rep: Actin-related protein 3 - Nicotiana tabacum (Common tobacco), complete [     | 18.21   | 1 |
| tc Rep: GRAS1 - Solanum lycopersicum (Tomato) (Lycopersicon esculentum), partia      | 18.9    | 1 |
| tc Rep: NmrA-like family protein - Solanum demissum (Wild potato), complete [TC4     | 198.96  | 1 |
| gb AGN_ELP009xo18f1.ab1 AGN_ELP Nicotiana tabacum cDNA 5', mRNA sequence             | 29.59   | 1 |
| tc Rep: 1,4-alpha-glucan-maltohydrolase - Solanum lycopersicum (Tomato) (Lycoper     | 616.02  | 1 |
| tc Rep: Chromosome chr5 scaffold_58, whole genome shotgun sequence - Vitis vin       | 900.07  | 1 |
| gb TT-21_J07 Samsun trichome library Nicotiana tabacum cDNA, mRNA sequence [         | 851.92  | 1 |
| Unknown                                                                              | 29.92   | 1 |
| gb BP136794 MAT001 Nicotiana tabacum cDNA clone BY9418, mRNA sequence [Bf            | 512.89  | 1 |
| gb KG9B.105H19F.051128T7 KG9B Nicotiana tabacum cDNA clone KG9B.105H19, n            | 342.39  | 1 |
| Unknown                                                                              | 99.9    | 1 |
| tc Rep: ATP synthase subunit d, mitochondrial - Arabidopsis thaliana (Mouse-ear cr   | 2944.23 | 1 |
| Unknown                                                                              | 23.11   | 1 |
| Unknown                                                                              | 19.72   | 1 |
| Unknown                                                                              | 346.99  | 1 |
| gb KR3B.113F23F.060119T7 KR3B Nicotiana tabacum cDNA clone KR3B.113F23, mI           | 243.68  | 1 |
| Unknown                                                                              | 18.61   | 1 |
| Unknown                                                                              | 278.54  | 1 |
| Unknown                                                                              | 97.75   | 1 |
| tc Rep: Tobamovirus multiplication 1 - Nicotiana tabacum (Common tobacco), part      | 138.06  | 1 |
| Unknown                                                                              | 102.91  | 1 |
| gb AGN_RNC015xc08f1.ab1 AGN_RNC Nicotiana tabacum cDNA 5', mRNA sequenc              | 182.83  | 1 |
| tc Rep: Glyceraldehyde-3-phosphate dehydrogenase - Nicotiana tabacum (Common         | 336.59  | 1 |
| tc Rep: Chromosome chr18 scaffold_137, whole genome shotgun sequence - Vitis v       | 174.72  | 1 |
| tc Rep: KH domain-containing protein-like - Oryza sativa subsp. japonica (Rice), par | 21.56   | 1 |
| Unknown                                                                              | 88.38   | 1 |
| tc Rep: Ribosomal protein S19 - Nicotiana tabacum (Common tobacco), complete [       | 165.48  | 1 |
| tc Rep: Chromosome chr6 scaffold_3, whole genome shotgun sequence - Vitis vinif      | 68.21   | 1 |
| tc Rep: Chromosome chr1 scaffold_5, whole genome shotgun sequence - Vitis vinif      | 376.82  | 1 |
| Unknown                                                                              | 676.25  | 1 |

|                                                                                   |         |   |
|-----------------------------------------------------------------------------------|---------|---|
| tc Rep: Chromosome chr19 scaffold_4, whole genome shotgun sequence - Vitis vin    | 1511.33 | 1 |
| tc Rep: Chromosome chr12 scaffold_78, whole genome shotgun sequence - Vitis vi    | 230.79  | 1 |
| gb KG9B.103L11F.051128T7 KG9B Nicotiana tabacum cDNA clone KG9B.103L11, m         | 66.32   | 1 |
| tc Rep: Chromosome chr13 scaffold_74, whole genome shotgun sequence - Vitis vi    | 80.63   | 1 |
| tc Rep: ATP synthase subunit beta, mitochondrial precursor - Nicotiana plumbagini | 445.85  | 1 |
| tc Rep: Chromosome chr11 scaffold_13, whole genome shotgun sequence - Vitis vi    | 915.44  | 1 |
| tc Rep: Chromosome chr9 scaffold_7, whole genome shotgun sequence - Vitis vinif   | 57.8    | 1 |
| tc Rep: DnaJ-like protein - Solanum tuberosum (Potato), partial (41%) [TC52062]   | 146.38  | 1 |
| tc Rep: Chromosome chr9 scaffold_7, whole genome shotgun sequence - Vitis vinif   | 650.55  | 1 |
| tc Rep: Chromosome chr2 scaffold_112, whole genome shotgun sequence - Vitis vi    | 38.74   | 1 |
| tc Rep: Plasma membrane ATPase 4 - Nicotiana glauca (Leadwort-leaved t            | 71.02   | 1 |
| gb KN6B.106O06F.060104T7 KN6B Nicotiana tabacum cDNA clone KN6B.106O06, r         | 7816.97 | 1 |
| Unknown                                                                           | 30.74   | 1 |
| gb KT7B.107M20F.060124T7 KT7 Nicotiana tabacum cDNA clone KT7B.107M20, ml         | 22.95   | 1 |
| Unknown                                                                           | 29.23   | 1 |
| gb Nicotiana tabacum cDNA-AFLP-fragment BSTT24-1-320, cultivar Bright Yellow 2    | 89.17   | 1 |
| gb CHO_SL013xn02f1.ab1 CHO_SL Nicotiana tabacum cDNA, mRNA sequence [EH6          | 765.11  | 1 |
| Unknown                                                                           | 382.56  | 1 |
| Unknown                                                                           | 148.39  | 1 |
| gb AGN_ELP012xk06f1.ab1 AGN_ELP Nicotiana tabacum cDNA 5', mRNA sequence          | 182.87  | 1 |
| Unknown                                                                           | 43.08   | 1 |
| tc Rep: Chromosome chr4 scaffold_6, whole genome shotgun sequence - Vitis vinif   | 513.17  | 1 |
| tc Rep: Ankyrin domain protein - Nicotiana glauca (Common tobacco), partial (47   | 174.54  | 1 |
| gb N.tabacum mRNA for ubiquitin activating enzyme E1 [Y10804]                     | 301.52  | 1 |
| tc Rep: Chromosome chr7 scaffold_31, whole genome shotgun sequence - Vitis vin    | 85.98   | 1 |
| gb AGN_RNC016xb07f1.ab1 AGN_RNC Nicotiana tabacum cDNA 5', mRNA sequenc           | 139.09  | 1 |
| Unknown                                                                           | 26      | 1 |
| Unknown                                                                           | 21.96   | 1 |
| Unknown                                                                           | 27.46   | 1 |
| gb Peg19C Early stage of anther development specific suppression subtractive cDN. | 352.56  | 1 |
| Unknown                                                                           | 58.03   | 1 |
| gb CHO_SL011xi16f1.ab1 CHO_SL Nicotiana tabacum cDNA, mRNA sequence [EH61         | 1676.78 | 1 |
| gb AGN_PNL227af1_b12.trimmed.seq AGN_PNL Nicotiana tabacum cDNA 5', mRN.          | 1691.29 | 1 |
| gb KG9B.104B08F.060120T7 KG9B Nicotiana tabacum cDNA clone KG9B.104B08, r         | 916.4   | 1 |

|                                                                                     |         |   |
|-------------------------------------------------------------------------------------|---------|---|
| gb KF8C.109L11F.051215T7 KF8 Nicotiana tabacum cDNA clone KF8C.109L11, mRN          | 11532.4 | 1 |
| tc Rep: Chromosome chr5 scaffold_67, whole genome shotgun sequence - Vitis vin      | 24.54   | 1 |
| Unknown                                                                             | 457.79  | 1 |
| tc Rep: Chromosome chr3 scaffold_8, whole genome shotgun sequence - Vitis vinif     | 247.48  | 1 |
| gb KF8B.201F18F.060124T7 KF8 Nicotiana tabacum cDNA clone KF8B.201F18, mRN          | 136.45  | 1 |
| Unknown                                                                             | 83.4    | 1 |
| tc Rep: Chromosome undetermined scaffold_257, whole genome shotgun sequenc          | 4651.02 | 1 |
| gb KN6B.100I14F.051019T7 KN6B Nicotiana tabacum cDNA clone KN6B.100I14, mF          | 36.82   | 1 |
| tc Rep: Chromosome chr10 scaffold_312, whole genome shotgun sequence - Vitis v      | 16489.9 | 1 |
| Unknown                                                                             | 34379.6 | 1 |
| gb AGN_RNC026xk17f1.ab1 AGN_RNC Nicotiana tabacum cDNA 5', mRNA sequenc             | 133.66  | 1 |
| gb KT7C.108N19F.051219T7 KT7 Nicotiana tabacum cDNA clone KT7C.108N19, mR           | 234.59  | 1 |
| Unknown                                                                             | 20.98   | 1 |
| tc Rep: Chromosome chr5 scaffold_72, whole genome shotgun sequence - Vitis vin      | 134.92  | 1 |
| tc Rep: Cell division cycle protein 48 homolog - Capsicum annuum (Bell pepper), pa  | 1111.55 | 1 |
| gb Nicotiana tabacum PK12 protein kinase (PK12) mRNA, complete cds [U73937]         | 113.83  | 1 |
| gb TT-30_N17 Burley21 trichome library Nicotiana tabacum cDNA, mRNA sequence        | 127.89  | 1 |
| tc Rep: Beta-ketoacyl-ACP synthase III - Jatropha curcas, partial (38%) [TC52485]   | 8641.23 | 1 |
| gb AM830473 seedling library, SL Nicotiana tabacum cDNA clone nt002049033, mF       | 49.84   | 1 |
| tc Rep: Chromosome chr14 scaffold_21, whole genome shotgun sequence - Vitis vi      | 72.73   | 1 |
| Unknown                                                                             | 46.28   | 1 |
| gb TT-10_C12 Burley21 trichome library Nicotiana tabacum cDNA, mRNA sequence        | 23.71   | 1 |
| Unknown                                                                             | 49.83   | 1 |
| tc Rep: Eukaryotic peptide chain release factor subunit 1-3-like - Solanum tuberosu | 24.62   | 1 |
| gb KT7C.108J02F.051219T7 KT7 Nicotiana tabacum cDNA clone KT7C.108J02, mRN          | 1585.58 | 1 |
| tc Rep: Plasma membrane ATPase 4 - Nicotiana plumbaginifolia (Leadwort-leaved t     | 68.78   | 1 |
| gb CHO_SL022xm01f1.ab1 CHO_SL Nicotiana tabacum cDNA, mRNA sequence [EH6            | 2905.6  | 1 |
| tc Rep: Chromosome undetermined scaffold_129, whole genome shotgun sequenc          | 370.86  | 1 |
| tc Rep: Chromosome chr11 scaffold_13, whole genome shotgun sequence - Vitis vi      | 249.93  | 1 |
| gb AGN_PNL210af1_h12.trimmed.seq AGN_PNL Nicotiana tabacum cDNA 5', mRN             | 44.38   | 1 |
| Unknown                                                                             | 564.37  | 1 |
| Unknown                                                                             | 531.68  | 1 |
| tc Rep: Chromosome chr8 scaffold_23, whole genome shotgun sequence - Vitis vin      | 31.85   | 1 |
| tc Rep: Chromosome chr14 scaffold_21, whole genome shotgun sequence - Vitis vi      | 517.71  | 1 |

|                                                                                      |         |   |
|--------------------------------------------------------------------------------------|---------|---|
| gb AGN_ELP009xl12f1.ab1 AGN_ELP Nicotiana tabacum cDNA 5', mRNA sequence             | 18.28   | 1 |
| tc Rep: Alcohol dehydrogenase class III-like protein - Solanum tuberosum (Potato),   | 176.24  | 1 |
| gb KF8B.202P17F.060124T7 KF8 Nicotiana tabacum cDNA clone KF8B.202P17, mRNA          | 56.74   | 1 |
| tc Rep: Heat shock factor 2-binding protein. - Gallus gallus, partial (6%) [TC66474] | 25.4    | 1 |
| gb KG9B.005M08F.050721T7 KG9B Nicotiana tabacum cDNA clone KG9B.005M08,              | 41.66   | 1 |
| Unknown                                                                              | 903     | 1 |
| gb KF8C.101D17F.051214T7 KF8 Nicotiana tabacum cDNA clone KF8C.101D17, mRNA          | 2689.41 | 1 |
| gb TT-31_K24 K326 trichome library Nicotiana tabacum cDNA, mRNA sequence [FG         | 55.3    | 1 |
| gb Nicotiana tabacum SR1 Nt-rab7b mRNA, complete cds [L29275]                        | 250.39  | 1 |
| gb Nicotiana tabacum putative mitotic phosphoprotein N' end family protein-like n    | 115.31  | 1 |
| Unknown                                                                              | 42.17   | 1 |
| tc Rep: Chromosome undetermined scaffold_2548, whole genome shotgun sequen           | 25.37   | 1 |
| Unknown                                                                              | 26.66   | 1 |
| Unknown                                                                              | 17.86   | 1 |
| gb AGN_RPC024xg23f1.ab1 AGN_RPC Nicotiana tabacum cDNA 5', mRNA sequence             | 79.74   | 1 |
| gb TT-23_H10 K326 early senescent leaf library Nicotiana tabacum cDNA, mRNA se       | 276.21  | 1 |
| gb KN6B.100O16F.051019T7 KN6B Nicotiana tabacum cDNA clone KN6B.100O16, r            | 256.48  | 1 |
| gb KT7C.101C21F.051216T7 KT7 Nicotiana tabacum cDNA clone KT7C.101C21, mRNA          | 47.1    | 1 |
| Unknown                                                                              | 122.44  | 1 |
| Unknown                                                                              | 421.73  | 1 |
| Unknown                                                                              | 525.48  | 1 |
| gb KN6B.106B02F.060104T7 KN6B Nicotiana tabacum cDNA clone KN6B.106B02, r            | 31.14   | 1 |
| gb BP534117 MAT005 Nicotiana tabacum cDNA clone BY32072, mRNA sequence [E            | 25.26   | 1 |
| gb Nicotiana tabacum vacuolar H+-ATPase B subunit mRNA, complete cds [AF2206         | 505.83  | 1 |
| gb KF8C.105D01F.051215T7 KF8 Nicotiana tabacum cDNA clone KF8C.105D01, mRNA          | 978.37  | 1 |
| tc Rep: Chromosome undetermined scaffold_345, whole genome shotgun sequenc           | 65.94   | 1 |
| gb BP534541 MAT005 Nicotiana tabacum cDNA clone BY33121, mRNA sequence [E            | 91.63   | 1 |
| gb TOBESTR023F04 TOBEST cDNA library 1 Nicotiana tabacum cDNA 5', mRNA seq           | 784.64  | 1 |
| Unknown                                                                              | 18317.6 | 1 |
| gb AGN_RPC015xd09f1.ab1 AGN_RPC Nicotiana tabacum cDNA 5', mRNA sequence             | 24.87   | 1 |
| tc Rep: Chromosome chr18 scaffold_1, whole genome shotgun sequence - Vitis vin       | 144.23  | 1 |
| gb KR3B.108H08F.051110T7 KR3B Nicotiana tabacum cDNA clone KR3B.108H08, m            | 409.13  | 1 |
| gb KR2B.109K19F.051229T7 KR2B Nicotiana tabacum cDNA clone KR2B.109K19, m            | 36.95   | 1 |
| gb AGN_RPC020xn11f1.ab1 AGN_RPC Nicotiana tabacum cDNA 5', mRNA sequence             | 99.95   | 1 |

|                                                                                      |          |   |
|--------------------------------------------------------------------------------------|----------|---|
| Unknown                                                                              | 66.04    | 1 |
| Unknown                                                                              | 21.39    | 1 |
| gb AGN_RNC020xm19f1.ab1 AGN_RNC Nicotiana tabacum cDNA 5', mRNA sequen               | 889.57   | 1 |
| gb KP1B.001G02F.050628T7 KP1B Nicotiana tabacum cDNA clone KP1B.001G02, m            | 33.56    | 1 |
| tc Rep: Chromosome chr8 scaffold_23, whole genome shotgun sequence - Vitis vin       | 528.7    | 1 |
| tc Rep: AML1 - Solanum lycopersicum (Tomato) (Lycopersicon esculentum), partial      | 11549    | 1 |
| gb KT7C.112F11F.051221T7 KT7 Nicotiana tabacum cDNA clone KT7C.112F11, mRN           | 936.62   | 1 |
| Unknown                                                                              | 36.38    | 1 |
| Unknown                                                                              | 26.33    | 1 |
| tc Rep: Os08g0518300 protein - Oryza sativa subsp. japonica (Rice), partial (8%) [TC | 42.02    | 1 |
| Unknown                                                                              | 3742.22  | 1 |
| Unknown                                                                              | 128.34   | 1 |
| tc Rep: Impa2 - Nicotiana benthamiana, partial (98%) [TC72049]                       | 4741.67  | 1 |
| gb KP1B.101O18F.050722T7 KP1B Nicotiana tabacum cDNA clone KP1B.101O18, m            | 67.49    | 1 |
| gb AGN_RPC021xI03f1.ab1 AGN_RPC Nicotiana tabacum cDNA 5', mRNA sequence             | 36.66    | 1 |
| gb KR2B.107P02F.051229T7 KR2B Nicotiana tabacum cDNA clone KR2B.107P02, m            | 2643.33  | 1 |
| gb KG9B.001F13F.050628T7 KG9B Nicotiana tabacum cDNA clone KG9B.001F13, m            | 168.6    | 1 |
| gb Nicotiana tabacum putative UDP-glucuronate decarboxylase 4 mRNA, partial cd       | 2961.5   | 1 |
| gb CHO_SL005xm18f1.ab1 CHO_SL Nicotiana tabacum cDNA, mRNA sequence [EH6             | 1757.5   | 1 |
| tc Rep: Mitochondrial phosphate transporter - Lotus japonicus, partial (88%) [TC44.  | 18531.65 | 1 |
| gb CHO_SL013xg16f1.ab1 CHO_SL Nicotiana tabacum cDNA, mRNA sequence [EH6             | 523.05   | 1 |
| tc Rep: Hsp20.1 protein - Solanum peruvianum (Peruvian tomato) (Lycopersicon pe      | 18.98    | 1 |
| tc Rep: Chromosome chr12 scaffold_78, whole genome shotgun sequence - Vitis vi       | 51.11    | 1 |
| tc Rep: Chromosome chr8 scaffold_34, whole genome shotgun sequence - Vitis vin       | 144.46   | 1 |
| gb FS411604 normalized full-length tobacco cDNA library Nicotiana tabacum cDNA       | 24.44    | 1 |
| tc Rep: Chromosome chr13 scaffold_17, whole genome shotgun sequence - Vitis vi       | 1447.96  | 1 |
| tc Rep: Chromosome chr6 scaffold_3, whole genome shotgun sequence - Vitis vinif      | 150.92   | 1 |
| Unknown                                                                              | 23.75    | 1 |
| Unknown                                                                              | 116.41   | 1 |
| Unknown                                                                              | 81.36    | 1 |
| gb KF8C.102A21F.051214T7 KF8 Nicotiana tabacum cDNA clone KF8C.102A21, mRN           | 53080.1  | 1 |
| tc Rep: Elongation factor 1-alpha - Nicotiana tabacum (Common tobacco), partial (:   | 189.46   | 1 |
| Unknown                                                                              | 511.39   | 1 |
| tc Rep: Chromosome chr18 scaffold_1, whole genome shotgun sequence - Vitis vin       | 245.59   | 1 |

|                                                                                     |          |   |
|-------------------------------------------------------------------------------------|----------|---|
| tc Rep: Chromosome chr2 scaffold_132, whole genome shotgun sequence - Vitis vi      | 33698.05 | 1 |
| gb AGN_RPC019xj05f1.ab1 AGN_RPC Nicotiana tabacum cDNA 5', mRNA sequence            | 27.37    | 1 |
| Unknown                                                                             | 92.95    | 1 |
| gb KG9B.001K12F.050628T7 KG9B Nicotiana tabacum cDNA clone KG9B.001K12, m           | 23.04    | 1 |
| gb KL5B.116F12F.060217T7 KL5B Nicotiana tabacum cDNA clone KL5B.116F12, mR          | 86.32    | 1 |
| tc Rep: Centrin - Nicotiana tabacum (Common tobacco), complete [TC41163]            | 39.67    | 1 |
| tc Rep: Chromosome chr18 scaffold_1, whole genome shotgun sequence - Vitis vin      | 388.22   | 1 |
| gb Nicotiana tabacum mRNA for thioredoxin peroxidase [AJ309009]                     | 625.38   | 1 |
| gb BP132942 MAT001 Nicotiana tabacum cDNA clone BY5155, mRNA sequence [BF           | 33.82    | 1 |
| tc Rep: Chromosome chr15 scaffold_19, whole genome shotgun sequence - Vitis vi      | 33.41    | 1 |
| gb AGN_RNC109xb01f1.ab1 AGN_RNC Nicotiana tabacum cDNA 5', mRNA sequenc             | 171.05   | 1 |
| tc Rep: Chromosome chr4 scaffold_39, whole genome shotgun sequence - Vitis vin      | 346.55   | 1 |
| gb KL4B.101G02F.051103T7 KL4B Nicotiana tabacum cDNA clone KL4B.101G02, mF          | 48.63    | 1 |
| Unknown                                                                             | 18.05    | 1 |
| gb TOBESTR017C04 TOBEST cDNA library 1 Nicotiana tabacum cDNA 5', mRNA seq          | 49.77    | 1 |
| gb AGN_RNC019xg12f1.ab1 AGN_RNC Nicotiana tabacum cDNA 5', mRNA sequenc             | 116.9    | 1 |
| Unknown                                                                             | 44.48    | 1 |
| tc Rep: Chromosome chr1 scaffold_46, whole genome shotgun sequence - Vitis vin      | 61.09    | 1 |
| tc Rep: Chromosome chr5 scaffold_2, whole genome shotgun sequence - Vitis vinif     | 24.39    | 1 |
| tc Rep: Chromosome chr8 scaffold_115, whole genome shotgun sequence - Vitis vi      | 519.25   | 1 |
| gb CHO_SL025xc21f1.ab1 CHO_SL Nicotiana tabacum cDNA, mRNA sequence [EH6.           | 2588.02  | 1 |
| gb TOBESTR094D04 TOBEST cDNA library 1 Nicotiana tabacum cDNA 5', mRNA seq          | 144.36   | 1 |
| gb KP1B.101N06F.050722T7 KP1B Nicotiana tabacum cDNA clone KP1B.101N06, m           | 185.55   | 1 |
| tc Rep: Chromosome chr1 scaffold_75, whole genome shotgun sequence - Vitis vin      | 140.03   | 1 |
| Unknown                                                                             | 41.23    | 1 |
| gb TT-27_J08 K326 late senescent leaf library Nicotiana tabacum cDNA, mRNA seq      | 1714.38  | 1 |
| gb TL13.102I09F.060313T7 TL13 Nicotiana tabacum cDNA clone TL13.102I09, mRN         | 58.67    | 1 |
| tc Rep: AMP-binding protein - Arabidopsis thaliana (Mouse-ear cress), partial (29%) | 160.69   | 1 |
| gb AGN_RNC010xj15f1.ab1 AGN_RNC Nicotiana tabacum cDNA 5', mRNA sequence            | 17.29    | 1 |
| tc Rep: Ras-related protein Rab5 - Nicotiana tabacum (Common tobacco), complet      | 206.36   | 1 |
| gb AGN_PNL221cf1_d10.trimmed.seq AGN_PNL Nicotiana tabacum cDNA 5', mRN             | 23.71    | 1 |
| gb Nicotiana tabacum mRNA for transcription factor Ntlim1, complete cds [AB0234     | 28.9     | 1 |
| tc Rep: Chromosome chr7 scaffold_31, whole genome shotgun sequence - Vitis vin      | 105.81   | 1 |
| tc Rep: Chromosome chr18 scaffold_1, whole genome shotgun sequence - Vitis vin      | 89.22    | 1 |



|                                                                                       |          |   |
|---------------------------------------------------------------------------------------|----------|---|
| tc Rep: Chromosome chr5 scaffold_124, whole genome shotgun sequence - Vitis vi        | 123.27   | 1 |
| gb TT-27_L12 Burley21 trichome library Nicotiana tabacum cDNA, mRNA sequence          | 31.55    | 1 |
| tc Rep: Chromosome undetermined scaffold_734, whole genome shotgun sequenc            | 428.99   | 1 |
| Unknown                                                                               | 44.76    | 1 |
| gb KR2B.110C17F.051229T7 KR2B Nicotiana tabacum cDNA clone KR2B.110C17, m             | 24.71    | 1 |
| tc Rep: Nucleoside diphosphate kinase 2, chloroplast precursor - Nicotiana tabacun    | 343.17   | 1 |
| gb KG9B.003K05F.050720T7 KG9B Nicotiana tabacum cDNA clone KG9B.003K05, m             | 37.07    | 1 |
| gb AGN_RNC106xd06r1.ab1 AGN_RNC Nicotiana tabacum cDNA 3', mRNA sequenc               | 47.43    | 1 |
| Unknown                                                                               | 23.94    | 1 |
| tc Rep: SLT1 protein - Nicotiana tabacum (Common tobacco), partial (41%) [TC530€      | 83.63    | 1 |
| tc Rep: Common plant regulatory factor 7 - Petroselinum crispum (Parsley) (Petrosi    | 1185.69  | 1 |
| gb KN6B.107N21F.060106T7 KN6B Nicotiana tabacum cDNA clone KN6B.107N21, r             | 60.6     | 1 |
| Unknown                                                                               | 25.1     | 1 |
| tc Rep: Chromosome chr17 scaffold_16, whole genome shotgun sequence - Vitis vi        | 423.57   | 1 |
| tc Rep: RNA-binding protein - Medicago truncatula (Barrel medic), partial (50%) [TC   | 460.12   | 1 |
| gb KF8C.102A06F.051214T7 KF8 Nicotiana tabacum cDNA clone KF8C.102A06, mRN            | 1022.51  | 1 |
| Unknown                                                                               | 497.76   | 1 |
| Unknown                                                                               | 406.8    | 1 |
| Unknown                                                                               | 141.03   | 1 |
| gb TDF16 Tobacco BY-2 ESTs modulated by Rhodococcus fascians Nicotiana tabacu         | 3124.07  | 1 |
| Unknown                                                                               | 1301.08  | 1 |
| tc Rep: Chromosome chr4 scaffold_39, whole genome shotgun sequence - Vitis vin        | 263.96   | 1 |
| gb Nicotiana tabacum cDNA-AFLP-fragment BSTT33-3-245, cultivar Bright Yellow 2        | 22.49    | 1 |
| Unknown                                                                               | 34.15    | 1 |
| Unknown                                                                               | 1073.85  | 1 |
| Unknown                                                                               | 43.85    | 1 |
| tc Rep: Elicitor-inducible protein EIG-J7 - Capsicum annuum (Bell pepper), partial (8 | 3137.84  | 1 |
| Unknown                                                                               | 1103.02  | 1 |
| gb TT-38_D17 tobacco leaf library Nicotiana tabacum cDNA, mRNA sequence [FG6:         | 424.79   | 1 |
| gb KR3B.109F02F.051111T7 KR3B Nicotiana tabacum cDNA clone KR3B.109F02, mF            | 12519.15 | 1 |
| tc Rep: Proline oxidase/dehydrogenase 1 - Nicotiana tabacum (Common tobacco),         | 1348.28  | 1 |
| tc Rep: Chromosome chr13 scaffold_152, whole genome shotgun sequence - Vitis v        | 28.75    | 1 |
| gb TT-18_H11 K326 early senescent leaf library Nicotiana tabacum cDNA, mRNA se        | 159.77   | 1 |
| gb KL4B.111C04F.060128T7 KL4B Nicotiana tabacum cDNA clone KL4B.111C04, mR            | 101.44   | 1 |

|                                                                                                |         |   |
|------------------------------------------------------------------------------------------------|---------|---|
| tc Rep: Chromosome undetermined scaffold_1169, whole genome shotgun sequence                   | 52.62   | 1 |
| gb EST_CSP001xg06f1.ab1 EST_CSP Nicotiana tabacum cDNA, mRNA sequence [EH61]                   | 32.85   | 1 |
| gb TT-19_N13 Burley21 trichome library Nicotiana tabacum cDNA, mRNA sequence [FG]              | 642.47  | 1 |
| tc Rep: Potassium channel NKT1 - Nicotiana tabacum (Common tobacco), complete cds              | 1442.57 | 1 |
| gb AGN_RPC007xc24f1.ab1 AGN_RPC Nicotiana tabacum cDNA 5', mRNA sequence [EH61]                | 129.85  | 1 |
| gb AGN_PNL213ar1_b8.trimmed.seq AGN_PNL Nicotiana tabacum cDNA 3', mRNA sequence [EH61]        | 94.36   | 1 |
| tc Rep: Chromosome chr12 scaffold_36, whole genome shotgun sequence - Vitis vinifera           | 22.9    | 1 |
| gb TL13.111M15F.060320T7 TL13 Nicotiana tabacum cDNA clone TL13.111M15, mRNA sequence [EH61]   | 573.91  | 1 |
| gb FS412034 normalized full-length tobacco cDNA library Nicotiana tabacum cDNA                 | 18.17   | 1 |
| tc Rep: Chromosome chr18 scaffold_61, whole genome shotgun sequence - Vitis vinifera           | 1046.43 | 1 |
| tc Rep: Chromosome chr8 scaffold_34, whole genome shotgun sequence - Vitis vinifera            | 721.27  | 1 |
| tc Rep: Glutamine synthetase - Nicotiana plumbaginifolia (Leadwort-leaved tobacco)             | 3266.36 | 1 |
| tc Rep: Chromosome undetermined scaffold_349, whole genome shotgun sequence                    | 45.64   | 1 |
| gb TT-47_I23 Burley21 trichome library Nicotiana tabacum cDNA, mRNA sequence [FG]              | 444.25  | 1 |
| tc Rep: Chromosome undetermined scaffold_143, whole genome shotgun sequence                    | 19.14   | 1 |
| Unknown                                                                                        | 821.91  | 1 |
| tc Rep: Cell division cycle protein 48 homolog - Glycine max (Soybean), partial (42%)          | 510.06  | 1 |
| tc Rep: GDP-D-mannose pyrophosphorylase - Nicotiana tabacum (Common tobacco)                   | 328.27  | 1 |
| gb KR3B.111D18F.060119T7 KR3B Nicotiana tabacum cDNA clone KR3B.111D18, mRNA sequence [EH61]   | 171.15  | 1 |
| tc Rep: Chromosome chr10 scaffold_43, whole genome shotgun sequence - Vitis vinifera           | 763.59  | 1 |
| gb EST_YP003xn17f1.ab1 EST_YP Nicotiana tabacum cDNA, mRNA sequence [EH61]                     | 19.54   | 1 |
| Unknown                                                                                        | 610.88  | 1 |
| tc Rep: Chromosome chr5 scaffold_64, whole genome shotgun sequence - Vitis vinifera            | 208     | 1 |
| Unknown                                                                                        | 126.47  | 1 |
| tc Rep: Chromosome chr3 scaffold_95, whole genome shotgun sequence - Vitis vinifera            | 27.06   | 1 |
| tc Rep: 50S ribosomal protein L33 - Vitis vinifera (Grape), partial (86%) [TC61399]            | 19.74   | 1 |
| Unknown                                                                                        | 40.17   | 1 |
| gb TT-29_J20 K326 trichome library Nicotiana tabacum cDNA, mRNA sequence [FG]                  | 109.98  | 1 |
| gb BP530118 MAT005 Nicotiana tabacum cDNA clone BY21102, mRNA sequence [EH61]                  | 9479.35 | 1 |
| gb KF8C.106A11F.051215T7 KF8 Nicotiana tabacum cDNA clone KF8C.106A11, mRNA sequence [EH61]    | 667.73  | 1 |
| tc Rep: Chromosome chr7 scaffold_275, whole genome shotgun sequence - Vitis vinifera           | 734.51  | 1 |
| Unknown                                                                                        | 1166.48 | 1 |
| gb AJ632774 Nicotiana tabacum leaf Nicotiana tabacum cDNA clone Nt02-F06, mRNA sequence [EH61] | 25.69   | 1 |
| gb KP1B.105D14F.060116T7 KP1B Nicotiana tabacum cDNA clone KP1B.105D14, mRNA sequence [EH61]   | 183.73  | 1 |

|                                                                                        |          |   |
|----------------------------------------------------------------------------------------|----------|---|
| gb EST_FLW001xk07f1.ab1 EST_FLW Nicotiana tabacum cDNA, mRNA sequence [E]              | 679.22   | 1 |
| tc Rep: Catalase isozyme 3 - Nicotiana plumbaginifolia (Leadwort-leaved tobacco),      | 9346.91  | 1 |
| tc Rep: Peroxisomal acyl-CoA oxidase 1A - Solanum lycopersicum (Tomato) (Lycopersicon) | 906.82   | 1 |
| tc Rep: PRL1 protein - Arabidopsis thaliana (Mouse-ear cress), partial (83%) [TC587]   | 331.85   | 1 |
| Unknown                                                                                | 756.19   | 1 |
| gb Nicotiana tabacum Mg protoporphyrin chelatase subunit (Chl I) mRNA, complete        | 26.95    | 1 |
| gb AM832067 DL, diurnal library Nicotiana tabacum cDNA clone nt005227057, mRNA         | 22.3     | 1 |
| gb AGN_PNL225dr1_b12.trimmed.seq AGN_PNL Nicotiana tabacum cDNA 3', mRNA               | 120.42   | 1 |
| gb KL4B.103L20F.051103T7 KL4B Nicotiana tabacum cDNA clone KL4B.103L20, mRNA           | 517.02   | 1 |
| Unknown                                                                                | 41.25    | 1 |
| gb FS392203 normalized full-length tobacco cDNA library Nicotiana tabacum cDNA         | 226.89   | 1 |
| Unknown                                                                                | 198.69   | 1 |
| Unknown                                                                                | 75.2     | 1 |
| gb KF8B.200B01F.060120T7 KF8 Nicotiana tabacum cDNA clone KF8B.200B01, mRNA            | 42.22    | 1 |
| Unknown                                                                                | 23.92    | 1 |
| gb TT-08_N19 Samsun trichome library Nicotiana tabacum cDNA, mRNA sequence             | 42.31    | 1 |
| tc Rep: Chromosome chr12 scaffold_57, whole genome shotgun sequence - Vitis vinifera   | 201.59   | 1 |
| tc Rep: Chromosome undetermined scaffold_171, whole genome shotgun sequence            | 1034.32  | 1 |
| Unknown                                                                                | 4729.49  | 1 |
| tc Rep: ADP ribosylation factor 002 - Daucus carota (Carrot), partial (93%) [TC5148]   | 13808.05 | 1 |
| gb Nicotiana tabacum mRNA for Avr9 elicitor response protein [AJ006228]                | 52.57    | 1 |
| tc Rep: Ycf3 - Ranunculus macranthus (Large buttercup), partial (71%) [TC72285]        | 41.13    | 1 |
| tc Rep: Chromosome chr18 scaffold_1, whole genome shotgun sequence - Vitis vinifera    | 144.04   | 1 |
| gb AM802310 seedling library, SL Nicotiana tabacum cDNA clone nt002093050, mRNA        | 157.73   | 1 |
| tc Rep: Chromosome chr3 scaffold_8, whole genome shotgun sequence - Vitis vinifera     | 234.37   | 1 |
| Unknown                                                                                | 117.16   | 1 |
| gb KR3B.108J11F.051110T7 KR3B Nicotiana tabacum cDNA clone KR3B.108J11, mRNA           | 148.38   | 1 |
| gb TT-07_I17 tobacco leaf library Nicotiana tabacum cDNA, mRNA sequence [FG63]         | 151.83   | 1 |
| Unknown                                                                                | 108.61   | 1 |
| gb KL5B.001H06F.050901T7 KL5B Nicotiana tabacum cDNA clone KL5B.001H06, mRNA           | 938.95   | 1 |
| tc Rep: Chromosome chr5 scaffold_2, whole genome shotgun sequence - Vitis vinifera     | 723.35   | 1 |
| Unknown                                                                                | 23.29    | 1 |
| gb Nicotiana tabacum GTP-binding protein (Ran-A1) mRNA, complete cds [L16767]          | 2873.9   | 1 |
| gb KP1B.101O07F.050722T7 KP1B Nicotiana tabacum cDNA clone KP1B.101O07, mRNA           | 33.26    | 1 |

|                                                                                       |          |   |
|---------------------------------------------------------------------------------------|----------|---|
| gb KP1B.101G06F.050722T7 KP1B Nicotiana tabacum cDNA clone KP1B.101G06, m             | 1150.02  | 1 |
| gb KL4B.109G08F.051106T7 KL4B Nicotiana tabacum cDNA clone KL4B.109G08, mF            | 38.1     | 1 |
| Unknown                                                                               | 101.06   | 1 |
| gb KP1B.104L17F.050725T7 KP1B Nicotiana tabacum cDNA clone KP1B.104L17, mF            | 138.13   | 1 |
| Unknown                                                                               | 113.67   | 1 |
| gb CHO_SL008xc16f1.ab1 CHO_SL Nicotiana tabacum cDNA, mRNA sequence [EH6:             | 576.98   | 1 |
| tc Rep: Chromosome chr2 scaffold_140, whole genome shotgun sequence - Vitis vi        | 3212.76  | 1 |
| tc Rep: inositol or phosphatidylinositol phosphatase/ phosphoric monoester hydro      | 23.72    | 1 |
| gb KL5B.110N11F.060117T7 KL5B Nicotiana tabacum cDNA clone KL5B.110N11, mF            | 184.79   | 1 |
| gb KF8C.104K05F.051214T7 KF8 Nicotiana tabacum cDNA clone KF8C.104K05, mRN            | 181.44   | 1 |
| tc Rep: Luminal-binding protein 3 - Nicotiana tabacum (Common tobacco), partial (     | 10914.55 | 1 |
| Unknown                                                                               | 26.39    | 1 |
| gb TT-36_F22 K326 early senescent leaf library Nicotiana tabacum cDNA, mRNA seq       | 158.58   | 1 |
| tc Rep: Chromosome chr18 scaffold_1, whole genome shotgun sequence - Vitis vin        | 163.66   | 1 |
| tc Rep: SNF7 family protein, expressed - Oryza sativa subsp. japonica (Rice), partial | 1034.11  | 1 |
| gb KN6B.103P05F.060103T7 KN6B Nicotiana tabacum cDNA clone KN6B.103P05, m             | 24.45    | 1 |
| Unknown                                                                               | 33.14    | 1 |
| gb AGN_RNC127xd05f1.ab1 AGN_RNC Nicotiana tabacum cDNA 5', mRNA sequenc               | 20.45    | 1 |
| Unknown                                                                               | 511.97   | 1 |
| Unknown                                                                               | 35.16    | 1 |
| Unknown                                                                               | 65.33    | 1 |
| tc Rep: Nuclear transport factor 2 - Arabidopsis thaliana (Mouse-ear cress), partial  | 1200.9   | 1 |
| gb N.tabacum PKTL7 mRNA for protein kinase [X71057]                                   | 189.65   | 1 |
| tc Rep: Chromosome chr18 scaffold_61, whole genome shotgun sequence - Vitis vi        | 221.24   | 1 |
| Unknown                                                                               | 25014.75 | 1 |
| gb KF8C.102A21F.051214T7 KF8 Nicotiana tabacum cDNA clone KF8C.102A21, mRN            | 53803.5  | 1 |
| tc Rep: Ripening regulated protein-like - Solanum tuberosum (Potato), complete [T     | 97.55    | 1 |
| gb TT-17_J16 K326 late senescent leaf library Nicotiana tabacum cDNA, mRNA seq        | 3338.33  | 1 |
| tc Rep: Chromosome chr6 scaffold_15, whole genome shotgun sequence - Vitis vin        | 28.55    | 1 |
| gb AGN_RNC018xn19f1.ab1 AGN_RNC Nicotiana tabacum cDNA 5', mRNA sequenc               | 32.13    | 1 |
| Unknown                                                                               | 102.81   | 1 |
| Unknown                                                                               | 19.44    | 1 |
| gb AGN_RNC010xc01r1.ab1 AGN_RNC Nicotiana tabacum cDNA 3', mRNA sequenc               | 55.42    | 1 |
| gb Nicotiana tabacum cDNA-AFLP fragment N_BC2M34-310 sequence [DQ460102]              | 471.29   | 1 |

|                                                                                       |          |   |
|---------------------------------------------------------------------------------------|----------|---|
| tc Rep: Acyl-CoA binding protein - Digitalis lanata (Foxglove), partial (97%) [TC6334 | 510.22   | 1 |
| Unknown                                                                               | 1138.27  | 1 |
| tc Rep: Chromosome chr5 scaffold_2, whole genome shotgun sequence - Vitis vinifera    | 2013.15  | 1 |
| Unknown                                                                               | 20748.85 | 1 |
| Unknown                                                                               | 106.9    | 1 |
| Unknown                                                                               | 44.28    | 1 |
| gb CHO_SL019xi02f1.ab1 CHO_SL Nicotiana tabacum cDNA, mRNA sequence [EH62             | 489.44   | 1 |
| tc Rep: Luminal-binding protein 8 - Nicotiana tabacum (Common tobacco), complete      | 8226.14  | 1 |
| gb AGN_PNL224af1_h1.trimmed.seq AGN_PNL Nicotiana tabacum cDNA 5', mRNA               | 51.66    | 1 |
| gb AM783324 COL, cold overnight library Nicotiana tabacum cDNA clone nt006021         | 96.21    | 1 |
| tc Rep: Chromosome chr11 scaffold_13, whole genome shotgun sequence - Vitis vinifera  | 43.43    | 1 |
| tc Rep: Chromosome chr19 scaffold_4, whole genome shotgun sequence - Vitis vinifera   | 1576.36  | 1 |
| Unknown                                                                               | 45.96    | 1 |
| tc Rep: Acireductone dioxygenase - Solanum tuberosum (Potato), complete [TC405        | 7594.06  | 1 |
| gb KN6B.105P12F.060104T7 KN6B Nicotiana tabacum cDNA clone KN6B.105P12, mRNA          | 36.03    | 1 |
| tc Rep: Nt-rab7c protein - Nicotiana tabacum (Common tobacco), partial (52%) [TC      | 18407.6  | 1 |
| gb Nicotiana tabacum cDNA-AFLP-fragment BSTT1-31-215, cultivar Bright Yellow 2        | 32.21    | 1 |
| gb TT-34_N02 Burley21 trichome library Nicotiana tabacum cDNA, mRNA sequence          | 348      | 1 |
| Unknown                                                                               | 962.33   | 1 |
| gb TT-01_B03 Samsun trichome library Nicotiana tabacum cDNA, mRNA sequence            | 24.73    | 1 |
| gb KF8C.102F19F.051214T7 KF8 Nicotiana tabacum cDNA clone KF8C.102F19, mRNA           | 101.3    | 1 |
| Unknown                                                                               | 84.87    | 1 |
| tc Rep: Acyltransferase family protein - Cytophaga hutchinsonii (strain ATCC 33406    | 210.73   | 1 |
| gb BP131040 MAT001 Nicotiana tabacum cDNA clone BY3062, mRNA sequence [BF             | 147.42   | 1 |
| gb CHO_SL018xn22f1.ab1 CHO_SL Nicotiana tabacum cDNA, mRNA sequence [EH6              | 2094.89  | 1 |
| gb KR3B.108D01F.051110T7 KR3B Nicotiana tabacum cDNA clone KR3B.108D01, mRNA          | 22.4     | 1 |
| gb KN6B.105P19F.060104T7 KN6B Nicotiana tabacum cDNA clone KN6B.105P19, mRNA          | 41.09    | 1 |
| gb TT-17_I13 Samsun trichome library Nicotiana tabacum cDNA, mRNA sequence [          | 43.23    | 1 |
| Unknown                                                                               | 13902.5  | 1 |
| gb AGN_RPC019xa16f1.ab1 AGN_RPC Nicotiana tabacum cDNA 5', mRNA sequence              | 1139.21  | 1 |
| tc Rep: Galactinol synthase - Brassica napus (Rape), partial (65%) [TC72414]          | 27.67    | 1 |
| gb AGN_RPC011xd05f1.ab1 AGN_RPC Nicotiana tabacum cDNA 5', mRNA sequence              | 185.72   | 1 |
| Unknown                                                                               | 122.98   | 1 |
| tc Rep: Chromosome chr18 scaffold_61, whole genome shotgun sequence - Vitis vinifera  | 757.99   | 1 |

|                                                                                       |          |   |
|---------------------------------------------------------------------------------------|----------|---|
| Unknown                                                                               | 21.7     | 1 |
| gb TT-47_H20 Samsun trichome library Nicotiana tabacum cDNA, mRNA sequence            | 64.43    | 1 |
| tc Rep: Chromosome chr6 scaffold_3, whole genome shotgun sequence - Vitis vinif       | 159.35   | 1 |
| tc Rep: Chromosome chr12 scaffold_18, whole genome shotgun sequence - Vitis vi        | 519.15   | 1 |
| Unknown                                                                               | 8538.06  | 1 |
| tc Rep: Chromosome chr6 scaffold_3, whole genome shotgun sequence - Vitis vinif       | 18.26    | 1 |
| tc Rep: Chromosome chr7 scaffold_20, whole genome shotgun sequence - Vitis vin        | 29.55    | 1 |
| tc Rep: Chromosome chr9 scaffold_7, whole genome shotgun sequence - Vitis vinif       | 49.68    | 1 |
| tc Rep: Glycoprotein-like protein - Solanum tuberosum (Potato), partial (97%) [TC5    | 53.49    | 1 |
| tc Rep: Chromosome chr17 scaffold_12, whole genome shotgun sequence - Vitis vi        | 839.87   | 1 |
| Unknown                                                                               | 27.68    | 1 |
| tc Rep: Branched-chain amino acid aminotransferase - Solanum tuberosum (Potato)       | 102.07   | 1 |
| Unknown                                                                               | 246.75   | 1 |
| Unknown                                                                               | 41.69    | 1 |
| gb KF8B.202A03F.060124T7 KF8 Nicotiana tabacum cDNA clone KF8B.202A03, mR             | 10466.9  | 1 |
| tc Rep: DnaJ-like protein - Solanum tuberosum (Potato), partial (46%) [TC44527]       | 8103.07  | 1 |
| Unknown                                                                               | 3303.59  | 1 |
| gb AGN_RNC026xd16f1.ab1 AGN_RNC Nicotiana tabacum cDNA 5', mRNA sequenc               | 40.32    | 1 |
| tc Rep: Chromosome chr17 scaffold_16, whole genome shotgun sequence - Vitis vi        | 83.93    | 1 |
| gb KP1B.102J04F.050722T7 KP1B Nicotiana tabacum cDNA clone KP1B.102J04, mR            | 34.81    | 1 |
| gb Nicotiana tabacum NtADH mRNA for allyl alcohol dehydrogenase, complete cds         | 1092.09  | 1 |
| gb AGN_RNC005xc17f1.ab1 AGN_RNC Nicotiana tabacum cDNA 5', mRNA sequenc               | 224.59   | 1 |
| gb BP534488 MAT005 Nicotiana tabacum cDNA clone BY33067, mRNA sequence [E             | 179.65   | 1 |
| tc Rep: Chromosome chr13 scaffold_48, whole genome shotgun sequence - Vitis vi        | 23.99    | 1 |
| tc Rep: MYB-CC type transfactor - Solanum tuberosum (Potato), partial (97%) [TC4      | 31.12    | 1 |
| tc GB U66264.1 AAC49970.1 ubiquitin [Nicotiana tabacum] [NP917335]                    | 30228.45 | 1 |
| Unknown                                                                               | 44.15    | 1 |
| tc Rep: Tousled-like protein kinase - Nicotiana glutinosa (Tobacco), partial (44%) [T | 20.79    | 1 |
| Unknown                                                                               | 79.07    | 1 |
| tc Rep: Chromosome chr1 scaffold_5, whole genome shotgun sequence - Vitis vinif       | 91.15    | 1 |
| tc Rep: AT4g05320/C17L7_240 - Arabidopsis thaliana (Mouse-ear cress), partial (98     | 648.43   | 1 |
| gb KR3B.111J10F.060119T7 KR3B Nicotiana tabacum cDNA clone KR3B.111J10, mR            | 47.73    | 1 |
| tc Rep: ATP synthase subunit delta', mitochondrial precursor - Ipomoea batatas (Sw    | 663.41   | 1 |
| Unknown                                                                               | 27.66    | 1 |

|                                                                                      |          |   |
|--------------------------------------------------------------------------------------|----------|---|
| tc Rep: Predicted protein - Physcomitrella patens subsp. patens, partial (93%) [TC54 | 42.28    | 1 |
| Unknown                                                                              | 58.05    | 1 |
| tc Rep: Homolog of defender against apoptotic death 1 homolog - Nicotiana suave      | 886.84   | 1 |
| tc Rep: NtK-1-like - Solanum tuberosum (Potato), complete [TC43192]                  | 10458.85 | 1 |
| gb AGN_RNC125xn09f1.ab1 AGN_RNC Nicotiana tabacum cDNA 5', mRNA sequenc              | 133.29   | 1 |
| Unknown                                                                              | 2483.77  | 1 |
| gb Nicotiana tabacum cDNA-AFLP-fragment BSTC1-12-275, cultivar Bright Yellow 2       | 2858.45  | 1 |
| gb KP1B.111O22F.060116T7 KP1B Nicotiana tabacum cDNA clone KP1B.111O22, m            | 189.37   | 1 |
| gb KG9B.001M18F.050628T7 KG9B Nicotiana tabacum cDNA clone KG9B.001M18,              | 44.89    | 1 |
| Unknown                                                                              | 156.24   | 1 |
| Unknown                                                                              | 31.76    | 1 |
| tc Rep: Chromosome undetermined scaffold_143, whole genome shotgun sequenc           | 387.3    | 1 |
| gb AGN_PNL222br1_d1.trimmed.seq AGN_PNL Nicotiana tabacum cDNA 3', mRNA              | 112.16   | 1 |
| tc Rep: 3-isopropylmalate dehydrogenase 2, chloroplast precursor - Arabidopsis thi   | 26.7     | 1 |
| tc Rep: Os05g0119300 protein - Oryza sativa subsp. japonica (Rice), partial (63%) [T | 474.78   | 1 |
| gb KR3B.112J23F.060119T7 KR3B Nicotiana tabacum cDNA clone KR3B.112J23, mR           | 79.85    | 1 |
| gb TT-35_B15 K326 early senescent leaf library Nicotiana tabacum cDNA, mRNA se       | 298.07   | 1 |
| gb TT-34_K15 Burley21 trichome library Nicotiana tabacum cDNA, mRNA sequence         | 69.41    | 1 |
| tc Rep: Chromosome chr18 scaffold_1, whole genome shotgun sequence - Vitis vin       | 21.47    | 1 |
| gb Nicotiana tabacum relA [AY046898]                                                 | 682.45   | 1 |
| tc Rep: Chromosome chr8 scaffold_23, whole genome shotgun sequence - Vitis vin       | 39.59    | 1 |
| tc Rep: RanBP2-type zinc finger protein At1g67325 - Arabidopsis thaliana (Mouse-e    | 478.97   | 1 |
| gb AGN_ELP005xb08f1.ab1 AGN_ELP Nicotiana tabacum cDNA 5', mRNA sequence             | 73       | 1 |
| tc Rep: Chromosome chr8 scaffold_34, whole genome shotgun sequence - Vitis vin       | 196.99   | 1 |
| Unknown                                                                              | 22.69    | 1 |
| Unknown                                                                              | 97.73    | 1 |
| Unknown                                                                              | 25.71    | 1 |
| gb Nicotiana tabacum S25-PR6 mRNA, complete cds [U44760]                             | 31.17    | 1 |
| tc Rep: F3L24.22 protein - Arabidopsis thaliana (Mouse-ear cress), partial (78%) [TC | 35.12    | 1 |
| Unknown                                                                              | 265.1    | 1 |
| Unknown                                                                              | 29.95    | 1 |
| Unknown                                                                              | 20.74    | 1 |
| Unknown                                                                              | 68.78    | 1 |
| gb KN6B.102J12F.051230T7 KN6B Nicotiana tabacum cDNA clone KN6B.102J12, mI           | 24.84    | 1 |

|                                                                                          |         |   |
|------------------------------------------------------------------------------------------|---------|---|
| tc Rep: Diacylglycerol acylCoA acyltransferase - Nicotiana tabacum (Common tobacco)      | 135.15  | 1 |
| tc Rep: Chromosome chr5 scaffold_2, whole genome shotgun sequence - Vitis vinifera       | 241.15  | 1 |
| tc Rep: Chromosome chr4 scaffold_6, whole genome shotgun sequence - Vitis vinifera       | 53.62   | 1 |
| gb AM782197 seedling library, SL Nicotiana tabacum cDNA clone nt002176022, mRNA          | 49.35   | 1 |
| tc Rep: Chromosome chr17 scaffold_12, whole genome shotgun sequence - Vitis vinifera     | 27.17   | 1 |
| Unknown                                                                                  | 1538.11 | 1 |
| tc Rep: Chromosome chr17 scaffold_16, whole genome shotgun sequence - Vitis vinifera     | 38.73   | 1 |
| tc Rep: Polyubiquitin - Thlaspi caerulescens (Alpine penny-cress) (Thlaspi calaminaria)  | 686.87  | 1 |
| tc Rep: Chromosome chr18 scaffold_1, whole genome shotgun sequence - Vitis vinifera      | 23.31   | 1 |
| Unknown                                                                                  | 27.16   | 1 |
| tc Rep: Chromosome chr6 scaffold_3, whole genome shotgun sequence - Vitis vinifera       | 2326.56 | 1 |
| tc Rep: MYB-CC type transfactor - Solanum tuberosum (Potato), partial (97%) [TC4:1]      | 21.36   | 1 |
| Unknown                                                                                  | 197.39  | 1 |
| Unknown                                                                                  | 36.06   | 1 |
| Unknown                                                                                  | 377.67  | 1 |
| gb KR3B.113N15F.060119T7 KR3B Nicotiana tabacum cDNA clone KR3B.113N15, mRNA             | 1451.56 | 1 |
| gb AGN_RNC009xg09f1.ab1 AGN_RNC Nicotiana tabacum cDNA 5', mRNA sequence                 | 28.5    | 1 |
| tc Rep: Chromosome chr19 scaffold_35, whole genome shotgun sequence - Vitis vinifera     | 2721.98 | 1 |
| gb CHO_SL004xg01f1.ab1 CHO_SL Nicotiana tabacum cDNA, mRNA sequence [EH6:1]              | 145.84  | 1 |
| gb TT-30_F22 Samsun trichome library Nicotiana tabacum cDNA, mRNA sequence [EH6:1]       | 3686.88 | 1 |
| tc Rep: Chromosome chr7 scaffold_20, whole genome shotgun sequence - Vitis vinifera      | 59.58   | 1 |
| gb AGN_ELP022xa22f1.ab1 AGN_ELP Nicotiana tabacum cDNA 5', mRNA sequence                 | 45.25   | 1 |
| gb AGN_RPC014xb21f1.ab1 AGN_RPC Nicotiana tabacum cDNA 5', mRNA sequence                 | 38.46   | 1 |
| tc Rep: Succinate dehydrogenase subunit 3 - Solanum lycopersicum (Tomato) (Lycopersicon) | 2808.97 | 1 |
| gb KL4B.103H20F.051103T7 KL4B Nicotiana tabacum cDNA clone KL4B.103H20, mRNA             | 47.89   | 1 |
| Unknown                                                                                  | 220.26  | 1 |
| Unknown                                                                                  | 103.71  | 1 |
| gb KG9B.103L12F.051128T7 KG9B Nicotiana tabacum cDNA clone KG9B.103L12, mRNA             | 197.9   | 1 |
| gb KF8C.108A02F.051215T7 KF8C Nicotiana tabacum cDNA clone KF8C.108A02, mRNA             | 9828.19 | 1 |
| tc Rep: Cytochrome c1-1, heme protein, mitochondrial precursor - Solanum tuberosum       | 4078.27 | 1 |
| tc Rep: Chromosome undetermined scaffold_2463, whole genome shotgun sequence             | 486.72  | 1 |
| gb Nicotiana tabacum phospholipase C2 mRNA, complete cds [AF223573]                      | 52.66   | 1 |
| gb AGN_RNC013xn09f1.ab1 AGN_RNC Nicotiana tabacum cDNA 5', mRNA sequence                 | 35.62   | 1 |
| gb N.tabacum mRNA for pyruvate kinase [Z29492]                                           | 264.41  | 1 |



|                                                                                   |          |   |
|-----------------------------------------------------------------------------------|----------|---|
| gb KR2B.107G14F.051229T7 KR2B Nicotiana tabacum cDNA clone KR2B.107G14, m         | 57.99    | 1 |
| gb AGN_ELP019xk13f1.ab1 AGN_ELP Nicotiana tabacum cDNA 5', mRNA sequence          | 197.21   | 1 |
| gb TT-23_K11 K326 late senescent leaf library Nicotiana tabacum cDNA, mRNA seq    | 201.81   | 1 |
| Unknown                                                                           | 178.26   | 1 |
| Unknown                                                                           | 85.46    | 1 |
| gb TT-13_H21 Samsun trichome library Nicotiana tabacum cDNA, mRNA sequence        | 510.34   | 1 |
| Unknown                                                                           | 50.4     | 1 |
| gb TT-26_M20 Samsun trichome library Nicotiana tabacum cDNA, mRNA sequence        | 8304.63  | 1 |
| gb Nicotiana tabacum cDNA-AFLP-fragment BSTT2-12-440, cultivar Bright Yellow 2    | 32.2     | 1 |
| gb KR3B.001E07F.050815T7 KR3B Nicotiana tabacum cDNA clone KR3B.001E07, ml        | 136.29   | 1 |
| tc Rep: Mature anther-specific protein LAT61 - Solanum lycopersicum (Tomato) (Ly  | 41.88    | 1 |
| gb Nicotiana tabacum blp4 mRNA for luminal binding protein (BiP) [X60057]         | 5073.58  | 1 |
| gb KT7C.104I03F.051219T7 KT7 Nicotiana tabacum cDNA clone KT7C.104I03, mRN/       | 575.8    | 1 |
| Unknown                                                                           | 23.45    | 1 |
| Unknown                                                                           | 27.98    | 1 |
| Unknown                                                                           | 45547.15 | 1 |
| tc Rep: Chromosome undetermined scaffold_53, whole genome shotgun sequence        | 19.27    | 1 |
| gb TT-10_J09 K326 late senescent leaf library Nicotiana tabacum cDNA, mRNA seq    | 488.95   | 1 |
| gb AGN_RNC022xb02f1.ab1 AGN_RNC Nicotiana tabacum cDNA 5', mRNA sequenc           | 25.67    | 1 |
| Unknown                                                                           | 62.71    | 1 |
| tc Rep: Chromosome chr4 scaffold_373, whole genome shotgun sequence - Vitis vi    | 194.69   | 1 |
| Unknown                                                                           | 25.21    | 1 |
| gb KL5B.118B19F.060217T7 KL5B Nicotiana tabacum cDNA clone KL5B.118B19, mR        | 152.78   | 1 |
| tc Rep: Chromosome chr7 scaffold_31, whole genome shotgun sequence - Vitis vin    | 95.7     | 1 |
| Unknown                                                                           | 31.21    | 1 |
| Unknown                                                                           | 4106.82  | 1 |
| Unknown                                                                           | 67.58    | 1 |
| tc Rep: 26S proteasome regulatory particle non-ATPase subunit 12 - Camellia sinen | 36.08    | 1 |
| gb Nicotiana tabacum mRNA for protein kinase CK2 alpha chain (ck2A2 gene) [AJ43   | 123.64   | 1 |
| Unknown                                                                           | 387.26   | 1 |
| gb KP1B.037F02F.050628T7 KP1B Nicotiana tabacum cDNA clone KP1B.037F02, mF        | 54.06    | 1 |
| tc Rep: Proteasome subunit beta type-1 - Petunia hybrida (Petunia), complete [TC4 | 117.77   | 1 |
| tc Rep: Guanine nucleotide-binding protein subunit beta-2 - Nicotiana tabacum (Co | 86.94    | 1 |
| Unknown                                                                           | 273.31   | 1 |

|                                                                                      |         |   |
|--------------------------------------------------------------------------------------|---------|---|
| gb CHO_SL018xl20f1.ab1 CHO_SL Nicotiana tabacum cDNA, mRNA sequence [EH61            | 86.76   | 1 |
| tc Rep: Copper-transporting P-type ATPase - Brassica napus (Rape), partial (37%) [T  | 346.79  | 1 |
| tc Rep: Chromosome chr11 scaffold_13, whole genome shotgun sequence - Vitis vi       | 122.65  | 1 |
| tc Rep: Chromosome chr14 scaffold_9, whole genome shotgun sequence - Vitis vin       | 635.32  | 1 |
| tc Rep: Chromosome chr14 scaffold_21, whole genome shotgun sequence - Vitis vi       | 121.91  | 1 |
| tc Rep: Chromosome chr12 scaffold_47, whole genome shotgun sequence - Vitis vi       | 291.43  | 1 |
| tc Rep: Chromosome chr15 scaffold_82, whole genome shotgun sequence - Vitis vi       | 39893.4 | 1 |
| tc Rep: Chromosome chr18 scaffold_137, whole genome shotgun sequence - Vitis v       | 96.31   | 1 |
| gb BP128844 MAT001 Nicotiana tabacum cDNA clone BY650, mRNA sequence [BP:            | 31.55   | 1 |
| tc Rep: Chromosome chr14 scaffold_9, whole genome shotgun sequence - Vitis vin       | 595.52  | 1 |
| Unknown                                                                              | 23.36   | 1 |
| tc Rep: Chromosome chr8 scaffold_29, whole genome shotgun sequence - Vitis vin       | 84.26   | 1 |
| Unknown                                                                              | 30.43   | 1 |
| Unknown                                                                              | 747.98  | 1 |
| gb KN6B.100O04F.051019T7 KN6B Nicotiana tabacum cDNA clone KN6B.100O04, r            | 29.61   | 1 |
| tc Rep: Glyoxalase/bleomycin resistance protein/dioxygenase - Sphingomonas witt      | 587.47  | 1 |
| gb KL4B.103F22F.051103T7 KL4B Nicotiana tabacum cDNA clone KL4B.103F22, mR           | 550.33  | 1 |
| gb 27E04 Transformed tobacco Lambda Zap II library Nicotiana tabacum cDNA 5', n      | 170.57  | 1 |
| Unknown                                                                              | 2704.08 | 1 |
| Unknown                                                                              | 6109.6  | 1 |
| tc Rep: Chloride channel Stcl1 - Solanum tuberosum (Potato), partial (27%) [TC551    | 988.98  | 1 |
| Unknown                                                                              | 78.33   | 1 |
| gb EST_CSP001xg06f1.ab1 EST_CSP Nicotiana tabacum cDNA, mRNA sequence [EH            | 22.18   | 1 |
| gb KL4B.103C02F.051103T7 KL4B Nicotiana tabacum cDNA clone KL4B.103C02, mR           | 934.69  | 1 |
| gb KR3B.110K15F.051111T7 KR3B Nicotiana tabacum cDNA clone KR3B.110K15, mI           | 1347.54 | 1 |
| tc Rep: Chromosome partitioning parB family protein - Clostridium tetani, partial (6 | 24.39   | 1 |
| tc Rep: Syntaxin-52 - Arabidopsis thaliana (Mouse-ear cress), partial (86%) [TC4342  | 1024.75 | 1 |
| Unknown                                                                              | 21.8    | 1 |
| Unknown                                                                              | 181.42  | 1 |
| gb KL5B.118O02F.060217T7 KL5B Nicotiana tabacum cDNA clone KL5B.118O02, mI           | 1504.38 | 1 |
| tc Rep: Chromosome chr17 scaffold_16, whole genome shotgun sequence - Vitis vi       | 755.8   | 1 |
| tc Rep: Chromosome chr5 scaffold_2, whole genome shotgun sequence - Vitis vinif      | 656.23  | 1 |
| gb CHO_SL014xb22f1.ab1 CHO_SL Nicotiana tabacum cDNA, mRNA sequence [EH6             | 3647.46 | 1 |
| tc Rep: GTP cyclohydrolase I - Solanum lycopersicum (Tomato) (Lycopersicon escul     | 1035.97 | 1 |

|                                                                                     |         |   |
|-------------------------------------------------------------------------------------|---------|---|
| gb CHO_SL011xk16f1.ab1 CHO_SL Nicotiana tabacum cDNA, mRNA sequence [EH6            | 1983.07 | 1 |
| Unknown                                                                             | 933.01  | 1 |
| gb KF8C.101J01F.051214T7 KF8 Nicotiana tabacum cDNA clone KF8C.101J01, mRN          | 422.89  | 1 |
| tc Rep: 40S ribosomal protein S24 - Vitis vinifera (Grape), partial (96%) [TC50264] | 67.91   | 1 |
| Unknown                                                                             | 514.4   | 1 |
| gb KF8C.102O14F.051214T7 KF8 Nicotiana tabacum cDNA clone KF8C.102O14, mRl          | 551.88  | 1 |
| tc Rep: Chromosome chr4 scaffold_6, whole genome shotgun sequence - Vitis vinif     | 151.06  | 1 |
| gb KF8C.102C14F.051214T7 KF8 Nicotiana tabacum cDNA clone KF8C.102C14, mRN          | 107.39  | 1 |
| gb KF8B.100A11F.051010T7 KF8 Nicotiana tabacum cDNA clone KF8B.100A11, mRl          | 348.54  | 1 |
| gb TOBESTR057A06 TOBEST cDNA library 1 Nicotiana tabacum cDNA 5', mRNA seq          | 220.73  | 1 |
| gb KG9B.002O02F.050720T7 KG9B Nicotiana tabacum cDNA clone KG9B.002O02, r           | 52.65   | 1 |
| Unknown                                                                             | 32.99   | 1 |
| gb TT-08_003 K326 early senescent leaf library Nicotiana tabacum cDNA, mRNA se      | 31.94   | 1 |
| gb KR2B.115F21F.051230T7 KR2B Nicotiana tabacum cDNA clone KR2B.115F21, mf          | 26.14   | 1 |
| Unknown                                                                             | 32.01   | 1 |
| Unknown                                                                             | 24.7    | 1 |
| tc Rep: Chromosome chr19 scaffold_4, whole genome shotgun sequence - Vitis vin      | 139.38  | 1 |
| gb Nicotiana tabacum mRNA for ras-related protein RAB8-2, complete cds [AB079C      | 1477.54 | 1 |
| Unknown                                                                             | 443.48  | 1 |
| gb KR2B.104E14F.051227T7 KR2B Nicotiana tabacum cDNA clone KR2B.104E14, ml          | 181.86  | 1 |
| gb TT-50_E13 K326 late senescent leaf library Nicotiana tabacum cDNA, mRNA seq      | 4574.07 | 1 |
| gb KT7C.102A17F.051216T7 KT7 Nicotiana tabacum cDNA clone KT7C.102A17, mRl          | 397.48  | 1 |
| gb TT-09_K18 Burley21 trichome library Nicotiana tabacum cDNA, mRNA sequence        | 241.32  | 1 |
| tc Rep: Chromosome chr2 scaffold_140, whole genome shotgun sequence - Vitis vi      | 120.36  | 1 |
| Unknown                                                                             | 260.31  | 1 |
| Unknown                                                                             | 2883.79 | 1 |
| tc Rep: Chromosome undetermined scaffold_131, whole genome shotgun sequenc          | 160.77  | 1 |
| tc Rep: UDP-glucuronic acid 4-epimerase - Zea mays (Maize), partial (84%) [TC5277   | 11347.2 | 1 |
| Unknown                                                                             | 28.59   | 1 |
| gb TT-05_F02 Samsun trichome library Nicotiana tabacum cDNA, mRNA sequence          | 19.12   | 1 |
| tc Rep: Chromosome chr9 scaffold_33, whole genome shotgun sequence - Vitis vin      | 5357.3  | 1 |
| Unknown                                                                             | 1207.34 | 1 |
| Unknown                                                                             | 28.71   | 1 |
| gb KG9B.002J02F.050720T7 KG9B Nicotiana tabacum cDNA clone KG9B.002J02, mf          | 175.88  | 1 |

|                                                                                      |         |   |
|--------------------------------------------------------------------------------------|---------|---|
| Unknown                                                                              | 980.96  | 1 |
| gb KT7C.105E22F.051219T7 KT7 Nicotiana tabacum cDNA clone KT7C.105E22, mRNA          | 126.86  | 1 |
| Unknown                                                                              | 106.99  | 1 |
| Unknown                                                                              | 38.1    | 1 |
| tc Rep: Enolase - Solanum lycopersicum (Tomato) (Lycopersicon esculentum), parti     | 1530.62 | 1 |
| gb Nicotiana tabacum mRNA for putative hydrolase (C171 gene) [AM851007]              | 52.84   | 1 |
| gb Nicotiana tabacum Avr9 [AF211537]                                                 | 53.66   | 1 |
| gb TT-08_A23 tobacco leaf library Nicotiana tabacum cDNA, mRNA sequence [FG6:        | 513.91  | 1 |
| gb EST_FLW001xl22f1.ab1 EST_FLW Nicotiana tabacum cDNA, mRNA sequence [E:            | 18.74   | 1 |
| gb BP128827 MAT001 Nicotiana tabacum cDNA clone BY631, mRNA sequence [BP:            | 23.4    | 1 |
| tc Rep: Acireductone dioxygenase - Solanum tuberosum (Potato), complete [TC443       | 4615.85 | 1 |
| gb KF8B.100D08F.151010T7 KF8 Nicotiana tabacum cDNA clone KF8B.100D08, mRN           | 283.04  | 1 |
| gb TT-10_P03 K326 late senescent leaf library Nicotiana tabacum cDNA, mRNA seq       | 103.01  | 1 |
| gb KF8B.202A23F.060124T7 KF8 Nicotiana tabacum cDNA clone KF8B.202A23, mRN           | 9030.24 | 1 |
| Unknown                                                                              | 32.84   | 1 |
| Unknown                                                                              | 60.72   | 1 |
| tc Rep: Chromosome chr5 scaffold_156, whole genome shotgun sequence - Vitis vi       | 28410.3 | 1 |
| gb EST_FLW004xa24f1.ab1 EST_FLW Nicotiana tabacum cDNA, mRNA sequence [E:            | 16069.4 | 1 |
| tc Rep: Sensor protein - Marinobacter sp. ELB17, partial (4%) [TC42609]              | 184.53  | 1 |
| gb BP533680 MAT005 Nicotiana tabacum cDNA clone BY30378, mRNA sequence [E            | 46.64   | 1 |
| Unknown                                                                              | 631.67  | 1 |
| tc Rep: Chromosome chr2 scaffold_187, whole genome shotgun sequence - Vitis vi       | 174.57  | 1 |
| gb KG9B.102I18F.051126T7 KG9B Nicotiana tabacum cDNA clone KG9B.102I18, mRN          | 101.22  | 1 |
| gb TT-47_K11 K326 late senescent leaf library Nicotiana tabacum cDNA, mRNA seq       | 325.16  | 1 |
| tc Rep: Mitochondrial import receptor subunit TOM6 homolog - Arabidopsis thaliai     | 79.64   | 1 |
| gb KF8C.103C17F.051214T7 KF8 Nicotiana tabacum cDNA clone KF8C.103C17, mRN           | 1264.17 | 1 |
| gb AGN_PNL229af1_c8.trimmed.seq AGN_PNL Nicotiana tabacum cDNA 5', mRNA              | 28.55   | 1 |
| gb TL13.002I13F.060117T7 TL13 Nicotiana tabacum cDNA clone TL13.002I13, mRN          | 105.85  | 1 |
| tc Rep: Chromosome chr13 scaffold_17, whole genome shotgun sequence - Vitis vi       | 728.31  | 1 |
| tc Rep: Single-stranded nucleic acid binding R3H - Medicago truncatula (Barrel med   | 8572.56 | 1 |
| tc Rep: ATP-dependent Clp protease proteolytic subunit - Vitis vinifera (Grape), par | 281.14  | 1 |
| gb KP1B.102C06F.050722T7 KP1B Nicotiana tabacum cDNA clone KP1B.102C06, mRN          | 32.89   | 1 |
| gb EST_YP003xi04f1.ab1 EST_YP Nicotiana tabacum cDNA, mRNA sequence [EH61f           | 447.34  | 1 |
| gb TT-15_M17 Burley21 trichome library Nicotiana tabacum cDNA, mRNA sequenc          | 129.29  | 1 |

|                                                                                       |          |   |
|---------------------------------------------------------------------------------------|----------|---|
| tc Rep: Chromosome chr16 scaffold_10, whole genome shotgun sequence - Vitis vi        | 718.83   | 1 |
| tc Rep: Chromosome chr1 scaffold_166, whole genome shotgun sequence - Vitis vi        | 78.44    | 1 |
| gb KG9B.001K18F.050628T7 KG9B Nicotiana tabacum cDNA clone KG9B.001K18, m             | 592.76   | 1 |
| Unknown                                                                               | 804.65   | 1 |
| tc Rep: Chromosome chr9 scaffold_7, whole genome shotgun sequence - Vitis vinif       | 481.63   | 1 |
| Unknown                                                                               | 465.48   | 1 |
| gb Nicotiana tabacum mRNA for cytosolic ascorbate peroxidase, complete cds [D85       | 1528.76  | 1 |
| gb TT-36_I13 Burley21 trichome library Nicotiana tabacum cDNA, mRNA sequence          | 34.54    | 1 |
| tc Rep: 60S ribosomal protein L41 - Homo sapiens (Human), complete [TC71128]          | 86.12    | 1 |
| gb BP530129 MAT005 Nicotiana tabacum cDNA clone BY21114, mRNA sequence [E             | 307.94   | 1 |
| gb EST_FLW002xl09f1.ab1 EST_FLW Nicotiana tabacum cDNA, mRNA sequence [E              | 1675.47  | 1 |
| gb AGN_PNL224dr1_g6.trimmed.seq AGN_PNL Nicotiana tabacum cDNA 3', mRNA               | 44.99    | 1 |
| tc Rep: Bax inhibitor 1 - Nicotiana tabacum (Common tobacco), complete [TC4129C       | 8974.62  | 1 |
| Unknown                                                                               | 23.71    | 1 |
| gb KP1B.001H22F.050628T7 KP1B Nicotiana tabacum cDNA clone KP1B.001H22, m             | 44.69    | 1 |
| tc Rep: L-galactose dehydrogenase - Nicotiana langsdorffii x Nicotiana sanderae (O    | 1358.87  | 1 |
| tc Rep: Ubiquitin carrier protein - Vitis vinifera (Grape), partial (75%) [TC47081]   | 144.13   | 1 |
| Unknown                                                                               | 758.5    | 1 |
| gb N.tabacum mRNA for transformer-SR ribonucleoprotein [Y09506]                       | 226.76   | 1 |
| gb KN6B.009I02F.050901T7 KN6B Nicotiana tabacum cDNA clone KN6B.009I02, mF            | 244.94   | 1 |
| gb CHO_SL003xp03f1.ab1 CHO_SL Nicotiana tabacum cDNA, mRNA sequence [EH6              | 20.17    | 1 |
| tc Rep: Joka2 - Nicotiana plumbaginifolia (Leadwort-leaved tobacco), partial (78%)    | 23.22    | 1 |
| gb KG9B.002B01F.050720T7 KG9B Nicotiana tabacum cDNA clone KG9B.002B01, m             | 66.15    | 1 |
| Unknown                                                                               | 51.32    | 1 |
| gb KP1B.102P18F.050722T7 KP1B Nicotiana tabacum cDNA clone KP1B.102P18, mF            | 19915.05 | 1 |
| Unknown                                                                               | 248.6    | 1 |
| gb AGN_RNC005xc17f1.ab1 AGN_RNC Nicotiana tabacum cDNA 5', mRNA sequenc               | 210.68   | 1 |
| Unknown                                                                               | 33769.9  | 1 |
| Unknown                                                                               | 4067.36  | 1 |
| Unknown                                                                               | 25.67    | 1 |
| gb KG9B.106M06F.051129T7 KG9B Nicotiana tabacum cDNA clone KG9B.106M06,               | 45.37    | 1 |
| gb EST_YP004xo19f1.ab1 EST_YP Nicotiana tabacum cDNA, mRNA sequence [EH61             | 519.46   | 1 |
| tc Rep: Splicing factor U2AF 65 kDa subunit - Caenorhabditis briggsae, partial (6%) [ | 765.7    | 1 |
| tc Rep: Chromosome chr12 scaffold_47, whole genome shotgun sequence - Vitis vi        | 41.89    | 1 |

|                                                                                            |          |   |
|--------------------------------------------------------------------------------------------|----------|---|
| gb BP192620 Nicotiana tabacum BY-2 Nicotiana tabacum cDNA clone n4, mRNA se                | 24.17    | 1 |
| gb KP1B.110N09F.050727T7 KP1B Nicotiana tabacum cDNA clone KP1B.110N09, m                  | 751.74   | 1 |
| gb TT-38_G05 tobacco leaf library Nicotiana tabacum cDNA, mRNA sequence [FG6:              | 34.16    | 1 |
| gb KN6B.105C10F.060104T7 KN6B Nicotiana tabacum cDNA clone KN6B.105C10, r                  | 21452.25 | 1 |
| Unknown                                                                                    | 354.06   | 1 |
| gb KF8C.106A10F.051215T7 KF8 Nicotiana tabacum cDNA clone KF8C.106A10, mRN                 | 78.25    | 1 |
| tc Rep: Chromosome chr4 scaffold_6, whole genome shotgun sequence - Vitis vinif            | 544.64   | 1 |
| gb Nicotiana tabacum putative chloroplast ribonucleoprotein-like mRNA, partial se          | 172.77   | 1 |
| gb KG9B.003K18F.050720T7 KG9B Nicotiana tabacum cDNA clone KG9B.003K18, m                  | 118.87   | 1 |
| Unknown                                                                                    | 56.2     | 1 |
| gb FS411044 normalized full-length tobacco cDNA library Nicotiana tabacum cDNA             | 99.58    | 1 |
| tc Rep: Endoplasmic reticulum chaperone protein - Catharanthus roseus (Rosy periwinkle) (N | 342.97   | 1 |
| gb N.tabacum mRNA for pyruvate decarboxylase 2 [X81855]                                    | 157.07   | 1 |
| gb KF8B.201M04F.060124T7 KF8 Nicotiana tabacum cDNA clone KF8B.201M04, mF                  | 1595.65  | 1 |
| tc Rep: Chromosome chr8 scaffold_68, whole genome shotgun sequence - Vitis vin             | 26.67    | 1 |
| tc Rep: Os05g0557700 protein - Oryza sativa subsp. japonica (Rice), partial (23%) [T       | 27.49    | 1 |
| gb KP1B.107F21F.050726T7 KP1B Nicotiana tabacum cDNA clone KP1B.107F21, mF                 | 26.81    | 1 |
| tc Rep: 40S ribosomal protein S2-3 - Arabidopsis thaliana (Mouse-ear cress), partial       | 187.79   | 1 |
| Unknown                                                                                    | 835.99   | 1 |
| Unknown                                                                                    | 238.61   | 1 |
| tc Rep: Chromosome chr7 scaffold_42, whole genome shotgun sequence - Vitis vin             | 27.3     | 1 |
| tc Rep: Chromosome undetermined scaffold_77, whole genome shotgun sequence                 | 72.14    | 1 |
| gb EST_FLW002xn07f1.ab1 EST_FLW Nicotiana tabacum cDNA, mRNA sequence [Ei                  | 30.52    | 1 |
| Unknown                                                                                    | 51.47    | 1 |
| tc Rep: Thioredoxin - Limonium bicolor, partial (64%) [TC42824]                            | 63.13    | 1 |
| gb N.tabacum mRNA for GTP-binding protein, SAR1 [X97967]                                   | 13089.45 | 1 |
| tc Rep: UDP-glucose:protein transglucosylase-like - Solanum tuberosum (Potato), c          | 1317.7   | 1 |
| Unknown                                                                                    | 60.52    | 1 |
| tc Rep: Chromosome chr18 scaffold_1, whole genome shotgun sequence - Vitis vin             | 1031.91  | 1 |
| Unknown                                                                                    | 37.61    | 1 |
| gb TT-04_H17 K326 early senescent leaf library Nicotiana tabacum cDNA, mRNA se             | 37.7     | 1 |
| Unknown                                                                                    | 518.09   | 1 |
| gb TT-49_L11 Burley21 trichome library Nicotiana tabacum cDNA, mRNA sequence               | 568.91   | 1 |
| gb BP533240 MAT005 Nicotiana tabacum cDNA clone BY29305, mRNA sequence [E                  | 21.24    | 1 |

|                                                                                                  |         |   |
|--------------------------------------------------------------------------------------------------|---------|---|
| Unknown                                                                                          | 159.26  | 1 |
| Unknown                                                                                          | 52.43   | 1 |
| tc Rep: Chromosome chr7 scaffold_20, whole genome shotgun sequence - Vitis vinifera              | 34.82   | 1 |
| tc Rep: GDP-mannose-3',5'-epimerase - Vitis vinifera (Grape), partial (44%) [TC4462]             | 3205.04 | 1 |
| gb AGN_ELP003xf11f1.ab1 AGN_ELP Nicotiana tabacum cDNA 5', mRNA sequence                         | 20.87   | 1 |
| tc Rep: AGAP000318-PA - Anopheles gambiae str. PEST, partial (9%) [TC72511]                      | 25.04   | 1 |
| Unknown                                                                                          | 29.38   | 1 |
| gb KG9B.005B15F.050721T7 KG9B Nicotiana tabacum cDNA clone KG9B.005B15, mRNA sequence            | 199.52  | 1 |
| Unknown                                                                                          | 139.86  | 1 |
| gb KG9B.003K21F.050720T7 KG9B Nicotiana tabacum cDNA clone KG9B.003K21, mRNA sequence            | 23.04   | 1 |
| tc Rep: RAN GTPase-activating protein 2 - Nicotiana benthamiana, partial (19%) [TC72511]         | 138     | 1 |
| gb AGN_RNC008xd08f1.ab1 AGN_RNC Nicotiana tabacum cDNA 5', mRNA sequence                         | 32.53   | 1 |
| gb Tobacco (N.tabacum) endochitinase mRNA, partial cds [M15173]                                  | 56.95   | 1 |
| tc Rep: 3-phosphoshikimate 1-carboxyvinyltransferase 1, chloroplast precursor - Nicotiana glauca | 145.84  | 1 |
| gb KG9B.001N04F.050628T7 KG9B Nicotiana tabacum cDNA clone KG9B.001N04, mRNA sequence            | 35.36   | 1 |
| gb KN6B.102A09F.051230T7 KN6B Nicotiana tabacum cDNA clone KN6B.102A09, mRNA sequence            | 123.93  | 1 |
| gb Nicotiana tabacum mRNA for 14-3-3 a-1 protein, complete cds [AB119466]                        | 7097.38 | 1 |
| tc Rep: Chromosome chr1 scaffold_5, whole genome shotgun sequence - Vitis vinifera               | 46.69   | 1 |
| tc Rep: Predicted protein - Physcomitrella patens subsp. patens, partial (72%) [TC62088]         | 85.74   | 1 |
| tc Rep: Chromosome chr2 scaffold_11, whole genome shotgun sequence - Vitis vinifera              | 71.87   | 1 |
| Unknown                                                                                          | 264.25  | 1 |
| tc Rep: TPR repeat - Medicago truncatula (Barrel medic), partial (75%) [TC62088]                 | 18.87   | 1 |
| Unknown                                                                                          | 138.27  | 1 |
| tc Rep: Chromosome chr5 scaffold_2, whole genome shotgun sequence - Vitis vinifera               | 249.1   | 1 |
| gb KP1B.104N18F.050725T7 KP1B Nicotiana tabacum cDNA clone KP1B.104N18, mRNA sequence            | 1183.64 | 1 |
| gb KL4B.105F18F.051104T7 KL4B Nicotiana tabacum cDNA clone KL4B.105F18, mRNA sequence            | 13984.7 | 1 |
| tc Rep: Chromosome chr16 scaffold_10, whole genome shotgun sequence - Vitis vinifera             | 152.62  | 1 |
| gb KP1B.101L08F.050722T7 KP1B Nicotiana tabacum cDNA clone KP1B.101L08, mRNA sequence            | 2913.68 | 1 |
| gb KN6B.110B11F.060106T7 KN6B Nicotiana tabacum cDNA clone KN6B.110B11, mRNA sequence            | 56.87   | 1 |
| tc Rep: EF hand family protein - Solanum demissum (Wild potato), complete [TC58:105.97]          | 105.97  | 1 |
| gb CHO_SL013xb17f1.ab1 CHO_SL Nicotiana tabacum cDNA, mRNA sequence [EH62088]                    | 50.12   | 1 |
| Unknown                                                                                          | 138.75  | 1 |
| tc Rep: Plasma membrane ATPase 1 - Nicotiana glauca (Leadwort-leaved tobacco)                    | 26.32   | 1 |
| gb KG9B.102A23F.051126T7 KG9B Nicotiana tabacum cDNA clone KG9B.102A23, mRNA sequence            | 2911.92 | 1 |

|                                                                                        |         |   |
|----------------------------------------------------------------------------------------|---------|---|
| Unknown                                                                                | 17.09   | 1 |
| gb TT-36_F05 K326 late senescent leaf library Nicotiana tabacum cDNA, mRNA seq         | 2784.75 | 1 |
| tc Rep: Chromosome undetermined scaffold_1021, whole genome shotgun sequen             | 108.75  | 1 |
| Unknown                                                                                | 107.33  | 1 |
| tc Rep: Chromosome chr1 scaffold_136, whole genome shotgun sequence - Vitis vi         | 81.63   | 1 |
| gb Nicotiana tabacum NtINV mRNA for invertase, partial cds [AB055500]                  | 17845   | 1 |
| gb CHO_SL020xm13f1.ab1 CHO_SL Nicotiana tabacum cDNA, mRNA sequence [EHf               | 334.47  | 1 |
| gb KP1B.103C08F.050725T7 KP1B Nicotiana tabacum cDNA clone KP1B.103C08, ml             | 70.6    | 1 |
| Unknown                                                                                | 35.08   | 1 |
| Unknown                                                                                | 1563.39 | 1 |
| tc Rep: Chromosome chr6 scaffold_3, whole genome shotgun sequence - Vitis vinif        | 106.87  | 1 |
| tc Rep: Chromosome chr4 scaffold_39, whole genome shotgun sequence - Vitis vin         | 686.54  | 1 |
| tc Rep: Chromosome chr11 scaffold_13, whole genome shotgun sequence - Vitis vi         | 489.26  | 1 |
| Unknown                                                                                | 118.57  | 1 |
| tc Rep: Chromosome chr5 scaffold_2, whole genome shotgun sequence - Vitis vinif        | 227.49  | 1 |
| Unknown                                                                                | 225     | 1 |
| tc Rep: Chromosome chr10 scaffold_138, whole genome shotgun sequence - Vitis v         | 558.34  | 1 |
| tc Rep: Histone H3.2 - Encephalartos altensteinii (Altenstein's bread tree) (Cycad), c | 25.5    | 1 |
| Unknown                                                                                | 2862.37 | 1 |
| Unknown                                                                                | 27.48   | 1 |
| Unknown                                                                                | 20.73   | 1 |
| gb Nicotiana tabacum bZIP transcription factor (BZI-1) mRNA, complete cds [AY061       | 455.51  | 1 |
| gb KR3B.113A04F.060119T7 KR3B Nicotiana tabacum cDNA clone KR3B.113A04, m              | 102.98  | 1 |
| gb Nicotiana tabacum mRNA for hypothetical protein [AJ133502]                          | 465.42  | 1 |
| tc Rep: Predicted protein - Chlamydomonas reinhardtii, partial (9%) [TC69281]          | 267.65  | 1 |
| tc Rep: Chromosome chr10 scaffold_312, whole genome shotgun sequence - Vitis v         | 3755.07 | 1 |
| Unknown                                                                                | 211.71  | 1 |
| tc Rep: Eukaryotic translation initiation factor eIF4E - Nicotiana tabacum (Common     | 268.65  | 1 |
| gb BP134733 MAT001 Nicotiana tabacum cDNA clone BY7163, mRNA sequence [BF              | 20.91   | 1 |
| tc Rep: H+-transporting two-sector ATPase, C (AC39) subunit - Medicago truncatula      | 3276.36 | 1 |
| tc Rep: Chromosome chr12 scaffold_36, whole genome shotgun sequence - Vitis vi         | 4040.26 | 1 |
| Unknown                                                                                | 145.12  | 1 |
| tc Rep: Expressed protein - Oryza sativa subsp. japonica (Rice), partial (60%) [TC474  | 98.69   | 1 |
| tc Rep: Glutathione S-transferase - Capsicum annuum (Bell pepper), partial (85%) [T    | 20.41   | 1 |



|                                                                                                |         |   |
|------------------------------------------------------------------------------------------------|---------|---|
| gb TT-20_A05 K326 late senescent leaf library Nicotiana tabacum cDNA, mRNA seq                 | 23.91   | 1 |
| gb AGN_PNL223br1_a3.trimmed.seq AGN_PNL Nicotiana tabacum cDNA 3', mRNA                        | 80.69   | 1 |
| tc Rep: Chromosome chr5 scaffold_2, whole genome shotgun sequence - Vitis vinifera             | 3075.27 | 1 |
| tc Rep: Ubiquitin carrier protein - Solanum tuberosum (Potato), complete [TC463101]            | 463.84  | 1 |
| tc Rep: Chromosome chr9 scaffold_7, whole genome shotgun sequence - Vitis vinifera             | 377.14  | 1 |
| Unknown                                                                                        | 24.47   | 1 |
| tc Rep: Predicted protein - Physcomitrella patens subsp. patens, complete [TC533801]           | 22.44   | 1 |
| gb KN6B.102G12F.051230T7 KN6B Nicotiana tabacum cDNA clone KN6B.102G12, mRNA                   | 3322.54 | 1 |
| tc Rep: Ubiquitin carboxyl-terminal hydrolase - Vitis vinifera (Grape), partial (7%) [T000001] | 65.27   | 1 |
| gb TT-09_M01 Samsun trichome library Nicotiana tabacum cDNA, mRNA sequence                     | 242.7   | 1 |
| gb CHO_SL014xg01f1.ab1 CHO_SL Nicotiana tabacum cDNA, mRNA sequence [EH600001]                 | 397.92  | 1 |
| gb Nicotiana tabacum glutamate [AY123847]                                                      | 138.82  | 1 |
| tc Rep: Chromosome chr1 scaffold_5, whole genome shotgun sequence - Vitis vinifera             | 2758.1  | 1 |
| tc Rep: Chromosome chr2 scaffold_11, whole genome shotgun sequence - Vitis vinifera            | 749.99  | 1 |
| Unknown                                                                                        | 88.33   | 1 |
| gb TT-39_O03 K326 early senescent leaf library Nicotiana tabacum cDNA, mRNA sequence           | 128.45  | 1 |
| Unknown                                                                                        | 1484.6  | 1 |
| Unknown                                                                                        | 118.03  | 1 |
| tc Rep: Bypass2 - Nicotiana benthamiana, complete [TC47299]                                    | 80.35   | 1 |
| tc Rep: Chromosome chr5 scaffold_67, whole genome shotgun sequence - Vitis vinifera            | 3358.36 | 1 |
| Unknown                                                                                        | 586.89  | 1 |
| Unknown                                                                                        | 1254.93 | 1 |
| gb FS408454 normalized full-length tobacco cDNA library Nicotiana tabacum cDNA                 | 258.1   | 1 |
| tc Rep: Chromosome chr3 scaffold_8, whole genome shotgun sequence - Vitis vinifera             | 42.71   | 1 |
| Unknown                                                                                        | 29.78   | 1 |
| gb AGN_ELP006xn06f1.ab1 AGN_ELP Nicotiana tabacum cDNA 5', mRNA sequence                       | 36.74   | 1 |
| Unknown                                                                                        | 40.14   | 1 |
| gb Nicotiana tabacum fatty acid hydroperoxide lyase mRNA, complete cds [DQ129001]              | 900.67  | 1 |
| gb KR2B.115K01F.051230T7 KR2B Nicotiana tabacum cDNA clone KR2B.115K01, mRNA                   | 26.61   | 1 |
| tc Rep: Chromosome chr11 scaffold_13, whole genome shotgun sequence - Vitis vinifera           | 53.39   | 1 |
| tc Rep: Chromosome chr14 scaffold_190, whole genome shotgun sequence - Vitis vinifera          | 30.96   | 1 |
| Unknown                                                                                        | 20.55   | 1 |
| gb KR3B.106G05F.051109T7 KR3B Nicotiana tabacum cDNA clone KR3B.106G05, mRNA                   | 810.66  | 1 |
| gb KR2B.101B04F.060128T7 KR2B Nicotiana tabacum cDNA clone KR2B.101B04, mRNA                   | 2625.67 | 1 |

|                                                                                       |          |   |
|---------------------------------------------------------------------------------------|----------|---|
| gb AGN_RNC025xl24f1.ab1 AGN_RNC Nicotiana tabacum cDNA 5', mRNA sequence              | 511.38   | 1 |
| Unknown                                                                               | 90.68    | 1 |
| gb KP1B.108O07F.050726T7 KP1B Nicotiana tabacum cDNA clone KP1B.108O07, m             | 135.01   | 1 |
| Unknown                                                                               | 76.98    | 1 |
| gb KL4B.101I21F.051103T7 KL4B Nicotiana tabacum cDNA clone KL4B.101I21, mRN           | 151.57   | 1 |
| Unknown                                                                               | 20.77    | 1 |
| Unknown                                                                               | 48.31    | 1 |
| gb Nicotiana tabacum clone PR26 mRNA sequence [AF154645]                              | 47.97    | 1 |
| gb CHO_SL013xk01f1.ab1 CHO_SL Nicotiana tabacum cDNA, mRNA sequence [EH6              | 891.12   | 1 |
| Unknown                                                                               | 72.79    | 1 |
| Unknown                                                                               | 1149.79  | 1 |
| tc Rep: Chromosome chr6 scaffold_3, whole genome shotgun sequence - Vitis vinif       | 2719.44  | 1 |
| gb KL4B.101I23F.051103T7 KL4B Nicotiana tabacum cDNA clone KL4B.101I23, mRN           | 28.75    | 1 |
| gb KR3B.111N12F.060119T7 KR3B Nicotiana tabacum cDNA clone KR3B.111N12, m             | 685.17   | 1 |
| gb KF8C.110J01F.051216T7 KF8 Nicotiana tabacum cDNA clone KF8C.110J01, mRN,           | 15026.65 | 1 |
| Unknown                                                                               | 453.26   | 1 |
| gb KP1B.104N22F.050725T7 KP1B Nicotiana tabacum cDNA clone KP1B.104N22, m             | 3420.21  | 1 |
| gb KG9B.002C21F.050720T7 KG9B Nicotiana tabacum cDNA clone KG9B.002C21, r             | 22.92    | 1 |
| gb KR3B.108M01F.051110T7 KR3B Nicotiana tabacum cDNA clone KR3B.108M01, r             | 10834.85 | 1 |
| gb KN6B.102L11F.051230T7 KN6B Nicotiana tabacum cDNA clone KN6B.102L11, m             | 3738.55  | 1 |
| Unknown                                                                               | 34.73    | 1 |
| tc Rep: E-class P450, group I - Medicago truncatula (Barrel medic), partial (17%) [TC | 90.39    | 1 |
| gb KR3B.112M13F.060119T7 KR3B Nicotiana tabacum cDNA clone KR3B.112M13, r             | 540.08   | 1 |
| Unknown                                                                               | 40.08    | 1 |
| tc Rep: Chromosome chr19 scaffold_66, whole genome shotgun sequence - Vitis vi        | 182.67   | 1 |
| gb KF8C.101J09F.051214T7 KF8 Nicotiana tabacum cDNA clone KF8C.101J09, mRN,           | 937.13   | 1 |
| tc Rep: Chromosome chr12 scaffold_36, whole genome shotgun sequence - Vitis vi        | 382.19   | 1 |
| tc Rep: ADP-ribosylation factor - Hyacinthus orientalis (Common hyacinth), partial (  | 44701.85 | 1 |
| gb CHO_SL027xa24f1.ab1 CHO_SL Nicotiana tabacum cDNA, mRNA sequence [EH6              | 259.13   | 1 |
| gb KG9B.106H16F.051129T7 KG9B Nicotiana tabacum cDNA clone KG9B.106H16, n             | 376.32   | 1 |
| tc Rep: Alpha-amylase precursor - Solanum tuberosum (Potato), complete [TC4059        | 186.09   | 1 |
| Unknown                                                                               | 31.69    | 1 |
| gb AM790664 seedling library, SL Nicotiana tabacum cDNA clone nt002250054, mF         | 31.98    | 1 |
| gb KL4B.102K23F.051125T7 KL4B Nicotiana tabacum cDNA clone KL4B.102K23, mR            | 29246.25 | 1 |

|                                                                                       |          |   |
|---------------------------------------------------------------------------------------|----------|---|
| Unknown                                                                               | 21.41    | 1 |
| gb N.tabacum mRNA for acidic chitinase PR-P [X51426]                                  | 42.32    | 1 |
| gb Nicotiana tabacum geranylgeranylated protein NTGP2 mRNA, complete cds [U6          | 1590.56  | 1 |
| Unknown                                                                               | 34.86    | 1 |
| Unknown                                                                               | 81.25    | 1 |
| gb KT7C.104P01F.051219T7 KT7 Nicotiana tabacum cDNA clone KT7C.104P01, mRN            | 2990.07  | 1 |
| tc Rep: Chromosome chr18 scaffold_1, whole genome shotgun sequence - Vitis vin        | 557.37   | 1 |
| tc Rep: UDP-glucuronic acid 4-epimerase - Zea mays (Maize), partial (53%) [TC4874     | 6561.96  | 1 |
| tc Rep: Chromosome undetermined scaffold_254, whole genome shotgun sequenc            | 25.57    | 1 |
| gb KF8B.200H02F.060120T7 KF8 Nicotiana tabacum cDNA clone KF8B.200H02, mRI            | 34814.55 | 1 |
| Unknown                                                                               | 229.48   | 1 |
| Unknown                                                                               | 518.49   | 1 |
| gb AGN_RNC026xj12f1.ab1 AGN_RNC Nicotiana tabacum cDNA 5', mRNA sequenc               | 53.95    | 1 |
| gb CHO_SL016xd16f1.ab1 CHO_SL Nicotiana tabacum cDNA, mRNA sequence [EH6              | 23.95    | 1 |
| Unknown                                                                               | 22.93    | 1 |
| gb KR3B.107E09F.051110T7 KR3B Nicotiana tabacum cDNA clone KR3B.107E09, mI            | 414.16   | 1 |
| gb KL4B.102E02F.051125T7 KL4B Nicotiana tabacum cDNA clone KL4B.102E02, mR            | 27.62    | 1 |
| gb Nicotiana tabacum NtVDAC2 mRNA for voltage-dependent anion channel, comp           | 237.73   | 1 |
| Unknown                                                                               | 1153.33  | 1 |
| gb AM827545 seedling library, SL Nicotiana tabacum cDNA clone nt002038039, mF         | 26.39    | 1 |
| gb N.tabacum mRNA for alcohol dehydrogenase [X81853]                                  | 2766.67  | 1 |
| tc Rep: Chromosome chr3 scaffold_8, whole genome shotgun sequence - Vitis vinif       | 513.95   | 1 |
| gb KG9B.002A07F.050720T7 KG9B Nicotiana tabacum cDNA clone KG9B.002A07, n             | 628.28   | 1 |
| gb AGN_PNL212cr1_e11.trimmed.seq AGN_PNL Nicotiana tabacum cDNA 3', mRN               | 37.75    | 1 |
| gb Nicotiana tabacum cDNA-AFLP-fragment BSTT12-2-230, cultivar Bright Yellow 2        | 62.23    | 1 |
| gb KP1B.111A19F.060116T7 KP1B Nicotiana tabacum cDNA clone KP1B.111A19, m             | 25.08    | 1 |
| tc Rep: P18 - Solanum chacoense (Chaco potato), complete [TC54135]                    | 212.19   | 1 |
| Unknown                                                                               | 60.19    | 1 |
| Unknown                                                                               | 907.11   | 1 |
| gb KF8C.106P09F.051215T7 KF8 Nicotiana tabacum cDNA clone KF8C.106P09, mRN            | 491.19   | 1 |
| gb KL4B.103E19F.051103T7 KL4B Nicotiana tabacum cDNA clone KL4B.103E19, mR            | 25.39    | 1 |
| gb KN6B.104N20F.060103T7 KN6B Nicotiana tabacum cDNA clone KN6B.104N20, r             | 135.25   | 1 |
| gb AM807444 seedling library, SL Nicotiana tabacum cDNA clone nt002277076, mF         | 25.04    | 1 |
| tc Rep: Light harvesting chlorophyll a/b-binding protein precursor - Nicotiana sylve: | 36.7     | 1 |

|                                                                                        |          |   |
|----------------------------------------------------------------------------------------|----------|---|
| tc Rep: WERBP-1 protein - Nicotiana tabacum (Common tobacco), partial (29%) [TC        | 791.84   | 1 |
| tc Rep: ER lumen protein retaining receptor - Vitis vinifera (Grape), partial (54%) [T | 1185.74  | 1 |
| tc Rep: Chromosome chr8 scaffold_34, whole genome shotgun sequence - Vitis vin         | 73.08    | 1 |
| Unknown                                                                                | 984.73   | 1 |
| gb CHO_SL023xa21f1.ab1 CHO_SL Nicotiana tabacum cDNA, mRNA sequence [EH6               | 721.76   | 1 |
| tc Rep: Chromosome chr16 scaffold_94, whole genome shotgun sequence - Vitis vi         | 17.88    | 1 |
| tc Rep: Chromosome chr5 scaffold_2, whole genome shotgun sequence - Vitis vinif        | 25489.05 | 1 |
| Unknown                                                                                | 67.3     | 1 |
| tc Rep: Chromosome chr14 scaffold_9, whole genome shotgun sequence - Vitis vin         | 50.16    | 1 |
| gb AGN_RNC105xb24f1.ab1 AGN_RNC Nicotiana tabacum cDNA 5', mRNA sequenc                | 21.88    | 1 |
| tc Rep: SGS3-like protein - Solanum lycopersicum (Tomato) (Lycopersicon esculent       | 48.09    | 1 |
| Unknown                                                                                | 169.53   | 1 |
| Unknown                                                                                | 816.57   | 1 |
| gb Nicotiana tabacum NtP4H2.2 mRNA for type 2 proly 4-hydroxylase, complete cd         | 1768.63  | 1 |
| tc Rep: Glycine-rich RNA-binding protein - Ricinus communis (Castor bean), partial     | 732.68   | 1 |
| Unknown                                                                                | 67.2     | 1 |
| gb KR2B.107K23F.051229T7 KR2B Nicotiana tabacum cDNA clone KR2B.107K23, m              | 462.88   | 1 |
| tc Rep: Chromosome chr19 scaffold_4, whole genome shotgun sequence - Vitis vin         | 372.99   | 1 |
| gb KL4B.105N07F.051104T7 KL4B Nicotiana tabacum cDNA clone KL4B.105N07, m              | 71.38    | 1 |
| tc Rep: Chromosome chr8 scaffold_41, whole genome shotgun sequence - Vitis vin         | 54.49    | 1 |
| Unknown                                                                                | 1447.78  | 1 |
| tc Rep: Glucose-6-phosphate isomerase - Solanum lycopersicum (Tomato) (Lycoper         | 498.73   | 1 |
| gb KN6B.101J14F.051230T7 KN6B Nicotiana tabacum cDNA clone KN6B.101J14, m              | 268.94   | 1 |
| tc Rep: P40-like protein - Solanum tuberosum (Potato), partial (93%) [TC71777]         | 72.9     | 1 |
| tc Rep: Cysteine proteinase inhibitor - Petunia hybrida (Petunia), partial (86%) [TC4  | 683.08   | 1 |
| gb KF8C.110N09F.051216T7 KF8 Nicotiana tabacum cDNA clone KF8C.110N09, m               | 43238.75 | 1 |
| tc Rep: UDP-glucuronate 4-epimerase 5 - Arabidopsis thaliana (Mouse-ear cress), p      | 2440.37  | 1 |
| Unknown                                                                                | 151.21   | 1 |
| tc Rep: DWARF1/DIMINUTO - Solanum lycopersicum (Tomato) (Lycopersicon esculi           | 527.52   | 1 |
| gb TT-14_D11 Burley21 trichome library Nicotiana tabacum cDNA, mRNA sequence           | 56.39    | 1 |
| tc Rep: Chromosome chr5 scaffold_2, whole genome shotgun sequence - Vitis vinif        | 1546.57  | 1 |
| Unknown                                                                                | 20.22    | 1 |
| tc Rep: Chromosome chr5 scaffold_2, whole genome shotgun sequence - Vitis vinif        | 580.3    | 1 |
| tc Rep: TPK1 - Nicotiana tabacum (Common tobacco), complete [TC64081]                  | 74.63    | 1 |

|                                                                                         |          |   |
|-----------------------------------------------------------------------------------------|----------|---|
| tc Rep: Chromosome chr14 scaffold_27, whole genome shotgun sequence - Vitis vi          | 109.09   | 1 |
| gb CHO_SL004xp09f1.ab1 CHO_SL Nicotiana tabacum cDNA, mRNA sequence [EH6                | 106.87   | 1 |
| gb KT7B.107I23F.060124T7 KT7 Nicotiana tabacum cDNA clone KT7B.107I23, mRN              | 126.44   | 1 |
| tc Rep: Chromosome chr17 scaffold_12, whole genome shotgun sequence - Vitis vi          | 141.35   | 1 |
| Unknown                                                                                 | 270.32   | 1 |
| tc Rep: Histone H4 - Tetraodon nigroviridis (Green puffer), partial (45%) [TC59268]     | 1741.64  | 1 |
| tc Rep: Chromosome chr16 scaffold_10, whole genome shotgun sequence - Vitis vi          | 684.26   | 1 |
| Unknown                                                                                 | 67.6     | 1 |
| gb KP1B.107E12F.050726T7 KP1B Nicotiana tabacum cDNA clone KP1B.107E12, mF              | 48.46    | 1 |
| Unknown                                                                                 | 83.5     | 1 |
| tc Rep: Citrate synthase - Nicotiana tabacum (Common tobacco), partial (46%) [TC4       | 11130.35 | 1 |
| tc Rep: Chromosome chr8 scaffold_34, whole genome shotgun sequence - Vitis vin          | 110.77   | 1 |
| tc Rep: Predicted protein - Emericella nidulans (Aspergillus nidulans), partial (5%) [1 | 102.06   | 1 |
| gb TT-20_A05 K326 late senescent leaf library Nicotiana tabacum cDNA, mRNA seq          | 122.38   | 1 |
| Unknown                                                                                 | 1511.92  | 1 |
| Unknown                                                                                 | 466.91   | 1 |
| Unknown                                                                                 | 21.42    | 1 |
| gb AGN_RNC026xh22f1.ab1 AGN_RNC Nicotiana tabacum cDNA 5', mRNA sequenc                 | 24.33    | 1 |
| gb KG9B.003N01F.050720T7 KG9B Nicotiana tabacum cDNA clone KG9B.003N01, n               | 179.09   | 1 |
| gb KT7C.106N02F.051219T7 KT7 Nicotiana tabacum cDNA clone KT7C.106N02, mR               | 249.42   | 1 |
| gb TT-41_E06 K326 early senescent leaf library Nicotiana tabacum cDNA, mRNA se          | 31.7     | 1 |
| Unknown                                                                                 | 20.66    | 1 |
| gb KL4B.102M10F.051125T7 KL4B Nicotiana tabacum cDNA clone KL4B.102M10, m               | 19.13    | 1 |
| Unknown                                                                                 | 27.91    | 1 |
| Unknown                                                                                 | 103.52   | 1 |
| tc Rep: Ferredoxin--NADP reductase, root-type isozyme, chloroplast precursor - Nic      | 30.59    | 1 |
| gb AGN_RNC013xm11f1.ab1 AGN_RNC Nicotiana tabacum cDNA 5', mRNA sequen                  | 530.57   | 1 |
| gb KP1B.001I07F.050628T7 KP1B Nicotiana tabacum cDNA clone KP1B.001I07, mRI             | 246.4    | 1 |
| gb 20.2D01 Transformed tobacco Lambda Zap II library Nicotiana tabacum cDNA 5'          | 535.95   | 1 |
| Unknown                                                                                 | 442.47   | 1 |
| tc Rep: Glycine dehydrogenase [decarboxylating], mitochondrial precursor - Solanu       | 14322.7  | 1 |
| tc Rep: Chromosome chr1 scaffold_166, whole genome shotgun sequence - Vitis vi          | 144.7    | 1 |
| gb AM786200 seedling library, SL Nicotiana tabacum cDNA clone nt002063089, mF           | 1362.71  | 1 |
| tc Rep: Decreased apical dominance protein - Petunia hybrida (Petunia), partial (47     | 51.42    | 1 |

|                                                                                      |          |   |
|--------------------------------------------------------------------------------------|----------|---|
| Unknown                                                                              | 54.56    | 1 |
| tc Rep: 50S ribosomal protein L27, chloroplast precursor - Nicotiana tabacum (Com    | 33.84    | 1 |
| tc Rep: Nuclear-localized RNA binding protein - Capsicum annuum (Bell pepper), pa    | 35.33    | 1 |
| Unknown                                                                              | 2376.78  | 1 |
| gb KG9B.106L01F.051129T7 KG9B Nicotiana tabacum cDNA clone KG9B.106L01, m            | 212.35   | 1 |
| gb TOBESTR046E09 TOBEST cDNA library 1 Nicotiana tabacum cDNA 5', mRNA seq           | 92.76    | 1 |
| gb KG9B.105L07F.051128T7 KG9B Nicotiana tabacum cDNA clone KG9B.105L07, m            | 181.74   | 1 |
| Unknown                                                                              | 21.13    | 1 |
| tc Rep: Chromosome chr19 scaffold_4, whole genome shotgun sequence - Vitis vin       | 67.12    | 1 |
| Unknown                                                                              | 29.24    | 1 |
| Unknown                                                                              | 211.42   | 1 |
| tc Rep: Chromosome chr5 scaffold_72, whole genome shotgun sequence - Vitis vin       | 104.67   | 1 |
| gb KP1B.109K19F.050727T7 KP1B Nicotiana tabacum cDNA clone KP1B.109K19, m            | 523.91   | 1 |
| Unknown                                                                              | 1090.87  | 1 |
| Unknown                                                                              | 68.28    | 1 |
| tc Rep: Chromosome chr5 scaffold_2, whole genome shotgun sequence - Vitis vinif      | 97.65    | 1 |
| gb Nicotiana tabacum mRNA for hypothetical protein (c17 gene) [AJ966358]             | 17.89    | 1 |
| Unknown                                                                              | 40.31    | 1 |
| tc Rep: Chromosome chr13 scaffold_74, whole genome shotgun sequence - Vitis vi       | 21.66    | 1 |
| gb KN6B.103M03F.060103T7 KN6B Nicotiana tabacum cDNA clone KN6B.103M03,              | 81.6     | 1 |
| tc Rep: Chromosome chr18 scaffold_61, whole genome shotgun sequence - Vitis vi       | 882.85   | 1 |
| tc Rep: RWD domain-containing protein - Solanum tuberosum (Potato), partial (93%     | 19.65    | 1 |
| gb AGN_RNC114xj01f1.ab1 AGN_RNC Nicotiana tabacum cDNA 5', mRNA sequence             | 146.33   | 1 |
| gb TT-25_H03 Samsun trichome library Nicotiana tabacum cDNA, mRNA sequence           | 72.67    | 1 |
| Unknown                                                                              | 262.01   | 1 |
| tc Rep: Pm27 protein - Prunus mume (Japanese flowering apricot), partial (57%) [T    | 550.21   | 1 |
| tc Rep: Vacuolar ATP synthase 16 kDa proteolipid subunit - Nicotiana tabacum (Cor    | 2678.67  | 1 |
| tc Rep: Polygalacturonase-like protein-like - Solanum tuberosum (Potato), partial (5 | 202.23   | 1 |
| tc Rep: Chromosome chr7 scaffold_20, whole genome shotgun sequence - Vitis vin       | 43.01    | 1 |
| gb KF8C.102C22F.051214T7 KF8 Nicotiana tabacum cDNA clone KF8C.102C22, mRN           | 140413.5 | 1 |
| gb KR2B.108M01F.051229T7 KR2B Nicotiana tabacum cDNA clone KR2B.108M01, r            | 176.04   | 1 |
| Unknown                                                                              | 27.24    | 1 |
| Unknown                                                                              | 175.57   | 1 |
| tc Rep: Low temperature and salt responsive protein - Solanum tuberosum (Potato      | 1231.2   | 1 |

|                                                                                        |          |   |
|----------------------------------------------------------------------------------------|----------|---|
| tc Rep: 60S ribosomal protein L6 - Mesembryanthemum crystallinum (Common ice           | 107.2    | 1 |
| tc Rep: Chromosome chr6 scaffold_25, whole genome shotgun sequence - Vitis vin         | 749.65   | 1 |
| gb AGN_RNC003xn20f1.ab1 AGN_RNC Nicotiana tabacum cDNA 5', mRNA sequenc                | 24.78    | 1 |
| gb AGN_RPC007xp13f1.ab1 AGN_RPC Nicotiana tabacum cDNA 5', mRNA sequenc                | 28.2     | 1 |
| gb KL4B.105P21F.051104T7 KL4B Nicotiana tabacum cDNA clone KL4B.105P21, mR             | 158.35   | 1 |
| Unknown                                                                                | 42.73    | 1 |
| tc Rep: Ethylene-responsive element binding protein 5 - Nicotiana tabacum (Comm        | 211.29   | 1 |
| gb TT-48_J10 Samsun trichome library Nicotiana tabacum cDNA, mRNA sequence [           | 416.61   | 1 |
| tc Rep: Enolase - Solanum lycopersicum (Tomato) (Lycopersicon esculentum), parti       | 259.22   | 1 |
| Unknown                                                                                | 45.76    | 1 |
| gb TT-30_L15 K326 trichome library Nicotiana tabacum cDNA, mRNA sequence [FG           | 41.13    | 1 |
| tc Rep: Glutamine synthetase - Nicotiana plumbaginifolia (Leadwort-leaved tobacc       | 1679.35  | 1 |
| tc Rep: Chromosome chr4 scaffold_6, whole genome shotgun sequence - Vitis vinif        | 135.09   | 1 |
| tc Rep: Chromosome chr5 scaffold_2, whole genome shotgun sequence - Vitis vinif        | 882.02   | 1 |
| tc Rep: Nucleic acid binding protein - Brassica campestris (Field mustard), partial (7 | 17.42    | 1 |
| gb CHO_SL022xi08f1.ab1 CHO_SL Nicotiana tabacum cDNA, mRNA sequence [EH61              | 213.9    | 1 |
| gb KF8C.110G08F.051216T7 KF8 Nicotiana tabacum cDNA clone KF8C.110G08, mRI             | 367.2    | 1 |
| Unknown                                                                                | 88.92    | 1 |
| Unknown                                                                                | 29.41    | 1 |
| gb TT-15_007 Samsun trichome library Nicotiana tabacum cDNA, mRNA sequence             | 98.18    | 1 |
| Unknown                                                                                | 140.19   | 1 |
| gb KL4B.105L10F.051104T7 KL4B Nicotiana tabacum cDNA clone KL4B.105L10, mRI            | 17074.6  | 1 |
| tc Rep: Chromosome undetermined scaffold_438, whole genome shotgun sequenc             | 107.5    | 1 |
| Unknown                                                                                | 23.35    | 1 |
| tc Rep: Chromosome chr17 scaffold_12, whole genome shotgun sequence - Vitis vi         | 95.79    | 1 |
| Unknown                                                                                | 321.95   | 1 |
| gb AGN_RNC025xl24f1.ab1 AGN_RNC Nicotiana tabacum cDNA 5', mRNA sequenc                | 502.26   | 1 |
| gb TT-19_K15 tobacco leaf library Nicotiana tabacum cDNA, mRNA sequence [FG63          | 5899.97  | 1 |
| Unknown                                                                                | 12457    | 1 |
| Unknown                                                                                | 69.29    | 1 |
| gb Nicotiana tabacum adenosine kinase isoform 2T mRNA, complete cds [AY69505           | 11131.65 | 1 |
| gb KT7C.113M12F.051221T7 KT7 Nicotiana tabacum cDNA clone KT7C.113M12, mI              | 1118.3   | 1 |
| Unknown                                                                                | 22.7     | 1 |
| Unknown                                                                                | 19.34    | 1 |

|                                                                                   |          |   |
|-----------------------------------------------------------------------------------|----------|---|
| gb KR2B.115B01F.051230T7 KR2B Nicotiana tabacum cDNA clone KR2B.115B01, m         | 165.92   | 1 |
| Unknown                                                                           | 18.6     | 1 |
| gb AGN_RNC108xf20f1.ab1 AGN_RNC Nicotiana tabacum cDNA 5', mRNA sequenc           | 133.73   | 1 |
| tc Rep: AT5g19750/T29J13_170 - Arabidopsis thaliana (Mouse-ear cress), partial (3 | 26.8     | 1 |
| Unknown                                                                           | 19039.75 | 1 |
| Unknown                                                                           | 891.54   | 1 |
| Unknown                                                                           | 70.23    | 1 |
| Unknown                                                                           | 25.42    | 1 |
| gb KT7C.112O16F.051221T7 KT7 Nicotiana tabacum cDNA clone KT7C.112O16, mR         | 105.66   | 1 |
| Unknown                                                                           | 48.12    | 1 |
| tc Rep: Chromosome chr7 scaffold_44, whole genome shotgun sequence - Vitis vin    | 69.32    | 1 |
| tc Rep: Chromosome chr7 scaffold_31, whole genome shotgun sequence - Vitis vin    | 137.53   | 1 |
| tc Rep: Chromosome chr1 scaffold_5, whole genome shotgun sequence - Vitis vinif   | 652.67   | 1 |
| gb BP128651 MAT001 Nicotiana tabacum cDNA clone BY423, mRNA sequence [BP:         | 222.5    | 1 |
| Unknown                                                                           | 219.53   | 1 |
| tc Rep: Chromosome chr2 scaffold_105, whole genome shotgun sequence - Vitis vi    | 505.05   | 1 |
| gb KP1B.109H15F.050727T7 KP1B Nicotiana tabacum cDNA clone KP1B.109H15, m         | 241.97   | 1 |
| Unknown                                                                           | 187.53   | 1 |
| gb N.tabacum NTP303 pollen specific mRNA [X61146]                                 | 61177.85 | 1 |
| tc Rep: Chromosome chr1 scaffold_135, whole genome shotgun sequence - Vitis vi    | 18.85    | 1 |
| Unknown                                                                           | 20.01    | 1 |
| Unknown                                                                           | 52.87    | 1 |
| gb KL4B.101K21F.051103T7 KL4B Nicotiana tabacum cDNA clone KL4B.101K21, mR        | 58.68    | 1 |
| gb KL4B.102G10F.051125T7 KL4B Nicotiana tabacum cDNA clone KL4B.102G10, mF        | 840.47   | 1 |
| gb KR2B.105H17F.051227T7 KR2B Nicotiana tabacum cDNA clone KR2B.105H17, m         | 82.02    | 1 |
| Unknown                                                                           | 9962.55  | 1 |
| tc Rep: CDC5-like protein - Solanum lycopersicum (Tomato) (Lycopersicon esculent  | 190.89   | 1 |
| tc Rep: Chromosome chr17 scaffold_101, whole genome shotgun sequence - Vitis v    | 84.93    | 1 |
| tc Rep: Chromosome chr18 scaffold_1, whole genome shotgun sequence - Vitis vin    | 749.6    | 1 |
| Unknown                                                                           | 22.16    | 1 |
| gb KF8C.106O11F.051215T7 KF8 Nicotiana tabacum cDNA clone KF8C.106O11, mRl        | 27.78    | 1 |
| Unknown                                                                           | 1580.43  | 1 |
| Unknown                                                                           | 17959.2  | 1 |
| Unknown                                                                           | 78.06    | 1 |



|                                                                                      |         |   |
|--------------------------------------------------------------------------------------|---------|---|
| tc Rep: Chromosome chr17 scaffold_16, whole genome shotgun sequence - Vitis vi       | 552.64  | 1 |
| Unknown                                                                              | 177.19  | 1 |
| tc Rep: Delta-1-pyrroline-5-carboxylate synthetase (P5CS) [Includes: Glutamate 5-k   | 2858    | 1 |
| Unknown                                                                              | 38.95   | 1 |
| gb BP530158 MAT005 Nicotiana tabacum cDNA clone BY21148, mRNA sequence [E            | 633.55  | 1 |
| gb KR3B.114C14F.060119T7 KR3B Nicotiana tabacum cDNA clone KR3B.114C14, m            | 64.45   | 1 |
| tc Rep: Chromosome chr13 scaffold_74, whole genome shotgun sequence - Vitis vi       | 131.37  | 1 |
| gb KN6B.103A01F.060103T7 KN6B Nicotiana tabacum cDNA clone KN6B.103A01, n            | 641.62  | 1 |
| gb ntsm20 embryogenic microspores Nicotiana tabacum cDNA, mRNA sequence [E           | 34.3    | 1 |
| gb KR3B.102K01F.051107T7 KR3B Nicotiana tabacum cDNA clone KR3B.102K01, m            | 234.99  | 1 |
| tc Rep: Chromosome chr17 scaffold_16, whole genome shotgun sequence - Vitis vi       | 436.45  | 1 |
| Unknown                                                                              | 28.81   | 1 |
| gb FS422353 normalized full-length tobacco cDNA library Nicotiana tabacum cDNA       | 1884.47 | 1 |
| tc Rep: MYB-CC type transfactor - Solanum tuberosum (Potato), partial (64%) [TC6:    | 208.95  | 1 |
| gb KF8B.202D12F.060124T7 KF8 Nicotiana tabacum cDNA clone KF8B.202D12, mR            | 31.23   | 1 |
| tc Rep: Chromosome chr5 scaffold_2, whole genome shotgun sequence - Vitis vinif      | 96.82   | 1 |
| tc Rep: Potyviral capsid protein interacting protein 1 - Nicotiana tabacum (Commor   | 40.79   | 1 |
| gb TT-14_N07 Samsun trichome library Nicotiana tabacum cDNA, mRNA sequence           | 81.12   | 1 |
| Unknown                                                                              | 864.04  | 1 |
| tc Rep: Chromosome chr12 scaffold_103, whole genome shotgun sequence - Vitis v       | 1837.41 | 1 |
| gb CHO_SL012xd11f1.ab1 CHO_SL Nicotiana tabacum cDNA, mRNA sequence [EH6             | 9560.95 | 1 |
| tc Rep: Fiber protein Fb2 - Gossypium barbadense (Sea-island cotton) (Egyptian cot   | 262.91  | 1 |
| gb KN6B.109N09F.060106T7 KN6B Nicotiana tabacum cDNA clone KN6B.109N09, r            | 45.84   | 1 |
| tc Rep: Chromosome chr4 scaffold_373, whole genome shotgun sequence - Vitis vi       | 54.91   | 1 |
| tc Rep: DNA-directed RNA polymerase subunit beta" - Nicotiana tomentosiformis (      | 131.52  | 1 |
| tc Rep: F6A14.10 protein - Arabidopsis thaliana (Mouse-ear cress), partial (78%) [TC | 20.74   | 1 |
| tc Rep: Chromosome chr9 scaffold_7, whole genome shotgun sequence - Vitis vinif      | 152.61  | 1 |
| tc Rep: binding - Arabidopsis thaliana, partial (72%) [TC49231]                      | 27.31   | 1 |
| tc Rep: Chromosome chr11 scaffold_13, whole genome shotgun sequence - Vitis vi       | 23.18   | 1 |
| gb KF8C.106P01F.051215T7 KF8 Nicotiana tabacum cDNA clone KF8C.106P01, mR            | 3365.9  | 1 |
| tc Rep: Glucose-6-phosphate isomerase - Solanum tuberosum (Potato), complete [       | 1217.02 | 1 |
| tc Rep: Chromosome chr15 scaffold_82, whole genome shotgun sequence - Vitis vi       | 28173.2 | 1 |
| gb KN6B.104I12F.060103T7 KN6B Nicotiana tabacum cDNA clone KN6B.104I12, mF           | 60.41   | 1 |
| gb TT-20_E11 Samsun trichome library Nicotiana tabacum cDNA, mRNA sequence           | 1122.05 | 1 |

|                                                                                         |          |   |
|-----------------------------------------------------------------------------------------|----------|---|
| gb KL4B.105L08F.051104T7 KL4B Nicotiana tabacum cDNA clone KL4B.105L08, mR              | 78.17    | 1 |
| tc Rep: Molecular chaperone Hsp90-2 - Nicotiana benthamiana, partial (35%) [TC45        | 1111.44  | 1 |
| tc Rep: Chromosome chr7 scaffold_42, whole genome shotgun sequence - Vitis vin          | 110.98   | 1 |
| tc Rep: Ubiquitin carrier protein - Vitis vinifera (Grape), partial (69%) [TC62639]     | 253.95   | 1 |
| gb AM793637 COL, cold overnight library Nicotiana tabacum cDNA clone nt006155           | 35.76    | 1 |
| gb KL4B.102P10F.051125T7 KL4B Nicotiana tabacum cDNA clone KL4B.102P10, mR              | 19.01    | 1 |
| tc Rep: Microtubule-associated protein MAP65-1a - Nicotiana tabacum (Common t           | 29.43    | 1 |
| tc Rep: Chromosome chr6 scaffold_25, whole genome shotgun sequence - Vitis vin          | 106.41   | 1 |
| gb KG9B.104J04F.060120T7 KG9B Nicotiana tabacum cDNA clone KG9B.104J04, mF              | 227.26   | 1 |
| Unknown                                                                                 | 67.35    | 1 |
| gb KT7C.106O09F.051219T7 KT7 Nicotiana tabacum cDNA clone KT7C.106O09, mR               | 32.65    | 1 |
| gb TOBESTR130D05 TOBEST cDNA library 1 Nicotiana tabacum cDNA 5', mRNA seq              | 539.41   | 1 |
| tc Rep: Chromosome chr18 scaffold_61, whole genome shotgun sequence - Vitis vi          | 86.88    | 1 |
| gb Nicotiana tabacum NtbZIP60 mRNA for basic region leucine zipper protein, com         | 3006.53  | 1 |
| gb KF8B.100E16F.051010T7 KF8 Nicotiana tabacum cDNA clone KF8B.100E16, mRN              | 43786.65 | 1 |
| gb Nicotiana tabacum mRNA for omega-3 fatty acid desaturase, complete cds [D79          | 7905.51  | 1 |
| gb AGN_ELP025xl06f1.ab1 AGN_ELP Nicotiana tabacum cDNA 5', mRNA sequence                | 30.33    | 1 |
| Unknown                                                                                 | 267.07   | 1 |
| tc Rep: STY-L protein - Antirrhinum majus (Garden snapdragon), partial (40%) [TC5:      | 51.74    | 1 |
| Unknown                                                                                 | 1136.24  | 1 |
| tc Rep: Adenylyl cyclase-associated protein - Vitis vinifera (Grape), partial (43%) [TC | 28.74    | 1 |
| gb KF8C.102B07F.051214T7 KF8 Nicotiana tabacum cDNA clone KF8C.102B07, mRN              | 951.32   | 1 |
| tc Rep: Ferrochelatase-2, chloroplast precursor - Hordeum vulgare (Barley), partial     | 86.24    | 1 |
| gb TT-38_H12 K326 early senescent leaf library Nicotiana tabacum cDNA, mRNA se          | 50.46    | 1 |
| Unknown                                                                                 | 1125.08  | 1 |
| Unknown                                                                                 | 29.51    | 1 |
| Unknown                                                                                 | 37.31    | 1 |
| Unknown                                                                                 | 66.71    | 1 |
| tc Rep: RAN - Nicotiana glauca (Wood tobacco), complete [TC41527]                       | 93       | 1 |
| tc Rep: Arabidopsis thaliana genomic DNA, chromosome 5, TAC clone:K9D7 - Arabi          | 111.8    | 1 |
| Unknown                                                                                 | 61.98    | 1 |
| Unknown                                                                                 | 182.84   | 1 |
| gb KF8C.103M15F.051214T7 KF8 Nicotiana tabacum cDNA clone KF8C.103M15, mF               | 55486.8  | 1 |
| gb KR2B.110D06F.051229T7 KR2B Nicotiana tabacum cDNA clone KR2B.110D06, m               | 266.82   | 1 |

|                                                                                       |         |   |
|---------------------------------------------------------------------------------------|---------|---|
| gb BP529129 MAT001 Nicotiana tabacum cDNA clone BY14015, mRNA sequence [E             | 42.41   | 1 |
| tc Rep: 28 kDa small subunit ribosomal protein - Capsicum annuum (Bell pepper), c     | 17.7    | 1 |
| gb Nicotiana tabacum partial mRNA for putative calcium dependent protein kinase       | 31.14   | 1 |
| gb CHO_SL003xl06f1.ab1 CHO_SL Nicotiana tabacum cDNA, mRNA sequence [EH62             | 377.01  | 1 |
| Unknown                                                                               | 173     | 1 |
| gb KN6B.009L20F.050901T7 KN6B Nicotiana tabacum cDNA clone KN6B.009L20, m             | 29.41   | 1 |
| tc Rep: Chitinase 134 - Nicotiana tabacum (Common tobacco), partial (98%) [TC708      | 36.28   | 1 |
| gb KN6B.113H03F.060127T7 KN6B Nicotiana tabacum cDNA clone KN6B.113H03, n             | 74.4    | 1 |
| Unknown                                                                               | 97.37   | 1 |
| Unknown                                                                               | 155.08  | 1 |
| gb KL4B.104M03F.051104T7 KL4B Nicotiana tabacum cDNA clone KL4B.104M03, r             | 203.04  | 1 |
| gb KG9B.105H03F.051128T7 KG9B Nicotiana tabacum cDNA clone KG9B.105H03, n             | 495.54  | 1 |
| Unknown                                                                               | 48.53   | 1 |
| tc Rep: Serine hydroxymethyltransferase, mitochondrial precursor - Solanum tuber      | 3809.15 | 1 |
| tc Rep: Adenosylhomocysteinase - Nicotiana sylvestris (Wood tobacco), partial (57%    | 21791.1 | 1 |
| gb TL13.103C23F.060313T7 TL13 Nicotiana tabacum cDNA clone TL13.103C23, mRl           | 60.88   | 1 |
| gb FSI_51 flooding-treated Nicotiana tabacum cDNA library Nicotiana tabacum cDN       | 259.08  | 1 |
| tc Rep: Chromosome chr5 scaffold_2, whole genome shotgun sequence - Vitis vinif       | 608.92  | 1 |
| tc Rep: Phytoene dehydrogenase-like protein - Oryza sativa subsp. japonica (Rice),    | 128.89  | 1 |
| gb KF8C.109F12F.051215T7 KF8 Nicotiana tabacum cDNA clone KF8C.109F12, mRN            | 46299   | 1 |
| gb AGN_RNC023xl07f1.ab1 AGN_RNC Nicotiana tabacum cDNA 5', mRNA sequence              | 39.46   | 1 |
| Unknown                                                                               | 244.74  | 1 |
| tc Rep: 28 kDa small subunit ribosomal protein - Capsicum annuum (Bell pepper), c     | 169.34  | 1 |
| tc Rep: Chromosome chr7 scaffold_20, whole genome shotgun sequence - Vitis vin        | 29.15   | 1 |
| Unknown                                                                               | 237.06  | 1 |
| Unknown                                                                               | 1027.32 | 1 |
| Unknown                                                                               | 48.63   | 1 |
| gb TT-41_K18 Samsun trichome library Nicotiana tabacum cDNA, mRNA sequence            | 136.62  | 1 |
| tc Rep: Chromosome chr8 scaffold_34, whole genome shotgun sequence - Vitis vin        | 25.69   | 1 |
| tc Rep: Elongation factor 1-gamma 2 - Oryza sativa subsp. japonica (Rice), partial (9 | 330.77  | 1 |
| gb Nicotiana tabacum mRNA for vacuolar invertase (vi gene) [AJ305044]                 | 84.96   | 1 |
| Unknown                                                                               | 69.17   | 1 |
| tc Rep: Chromosome chr5 scaffold_72, whole genome shotgun sequence - Vitis vin        | 22.46   | 1 |
| gb CHO_SL024xb11f1.ab1 CHO_SL Nicotiana tabacum cDNA, mRNA sequence [EH6              | 197.77  | 1 |

|                                                                                  |          |   |
|----------------------------------------------------------------------------------|----------|---|
| gb KG9B.003H12F.050720T7 KG9B Nicotiana tabacum cDNA clone KG9B.003H12, n        | 179.42   | 1 |
| gb KG9B.105I09F.051128T7 KG9B Nicotiana tabacum cDNA clone KG9B.105I09, mF       | 981.48   | 1 |
| gb KN6B.104H04F.060103T7 KN6B Nicotiana tabacum cDNA clone KN6B.104H04, n        | 65.39    | 1 |
| gb CHO_SL015xh04f2.ab1 CHO_SL Nicotiana tabacum cDNA, mRNA sequence [EH6         | 21.05    | 1 |
| gb KG9B.002B01F.050720T7 KG9B Nicotiana tabacum cDNA clone KG9B.002B01, r        | 150.1    | 1 |
| Unknown                                                                          | 21.13    | 1 |
| gb AM807789 COL, cold overnight library Nicotiana tabacum cDNA clone nt006056    | 57.75    | 1 |
| Unknown                                                                          | 2112.25  | 1 |
| tc Rep: Chromosome chr8 scaffold_88, whole genome shotgun sequence - Vitis vin   | 1503.63  | 1 |
| gb AM819791 seedling library, SL Nicotiana tabacum cDNA clone nt002152035, mF    | 327.55   | 1 |
| gb KF8C.101H12F.051214T7 KF8 Nicotiana tabacum cDNA clone KF8C.101H12, mRf       | 18.19    | 1 |
| tc Rep: Chromosome chr12 scaffold_103, whole genome shotgun sequence - Vitis v   | 151.71   | 1 |
| gb KG9B.102B16F.051126T7 KG9B Nicotiana tabacum cDNA clone KG9B.102B16, r        | 72.73    | 1 |
| gb FS422353 normalized full-length tobacco cDNA library Nicotiana tabacum cDNA   | 2036.35  | 1 |
| Unknown                                                                          | 4341.57  | 1 |
| tc Rep: Profilin - Solanum lycopersicum (Tomato) (Lycopersicon esculentum), comp | 2891.99  | 1 |
| gb KR2B.112B23F.051230T7 KR2B Nicotiana tabacum cDNA clone KR2B.112B23, m        | 30.49    | 1 |
| gb KG9B.102B10F.051126T7 KG9B Nicotiana tabacum cDNA clone KG9B.102B10, r        | 222.4    | 1 |
| gb KT7C.110D02F.051221T7 KT7 Nicotiana tabacum cDNA clone KT7C.110D02, mRf       | 146.35   | 1 |
| gb Nicotiana tabacum cDNA-AFLP fragment H-N_BC4M31-261 sequence [DQ46016         | 22.43    | 1 |
| tc Rep: Chromosome chr11 scaffold_13, whole genome shotgun sequence - Vitis vi   | 390.05   | 1 |
| tc Rep: Chromosome chr6 scaffold_15, whole genome shotgun sequence - Vitis vin   | 266.59   | 1 |
| gb CHO_SL012xk03f1.ab1 CHO_SL Nicotiana tabacum cDNA, mRNA sequence [EH6         | 3282.58  | 1 |
| tc Rep: DEAD-box ATP-dependent RNA helicase 53 - Oryza sativa subsp. japonica (R | 35.5     | 1 |
| tc Rep: Plasma membrane proton ATPase 5 - Nicotiana glauca (Leadwort-l           | 32038.65 | 1 |
| tc Rep: Chromosome chr8 scaffold_29, whole genome shotgun sequence - Vitis vin   | 236.74   | 1 |
| gb KL4B.104J20F.051104T7 KL4B Nicotiana tabacum cDNA clone KL4B.104J20, mRN      | 127.81   | 1 |
| gb KR3B.109J15F.051111T7 KR3B Nicotiana tabacum cDNA clone KR3B.109J15, mR       | 572.55   | 1 |
| gb KF8C.101I13F.051214T7 KF8 Nicotiana tabacum cDNA clone KF8C.101I13, mRN       | 1471.39  | 1 |
| Unknown                                                                          | 23.75    | 1 |
| Unknown                                                                          | 95.64    | 1 |
| Unknown                                                                          | 259.49   | 1 |
| gb KP1B.108F23F.050726T7 KP1B Nicotiana tabacum cDNA clone KP1B.108F23, mF       | 144.06   | 1 |
| Unknown                                                                          | 26.72    | 1 |

|                                                                                        |         |   |
|----------------------------------------------------------------------------------------|---------|---|
| gb KT7C.108F09F.051219T7 KT7 Nicotiana tabacum cDNA clone KT7C.108F09, mRNA            | 2602.06 | 1 |
| Unknown                                                                                | 21.84   | 1 |
| Unknown                                                                                | 10626.9 | 1 |
| gb KP1B.111B04F.060116T7 KP1B Nicotiana tabacum cDNA clone KP1B.111B04, mRNA           | 600.83  | 1 |
| gb KT7B.100M10F.051010T7 KT7 Nicotiana tabacum cDNA clone KT7B.100M10, mRNA            | 32.75   | 1 |
| gb KF8B.100E17F.051010T7 KF8 Nicotiana tabacum cDNA clone KF8B.100E17, mRNA            | 529.76  | 1 |
| tc Rep: Chromosome chr16 scaffold_271, whole genome shotgun sequence - Vitis vinifera  | 1159.02 | 1 |
| Unknown                                                                                | 29.37   | 1 |
| Unknown                                                                                | 1021.36 | 1 |
| Unknown                                                                                | 37.06   | 1 |
| gb KG9B.001H20F.050628T7 KG9B Nicotiana tabacum cDNA clone KG9B.001H20, mRNA           | 88.42   | 1 |
| gb KP1B.001O05F.050628T7 KP1B Nicotiana tabacum cDNA clone KP1B.001O05, mRNA           | 104.65  | 1 |
| gb KG9B.001G24F.050628T7 KG9B Nicotiana tabacum cDNA clone KG9B.001G24, mRNA           | 86.01   | 1 |
| gb AM838397 seedling library, SL Nicotiana tabacum cDNA clone nt002112049, mRNA        | 2209.66 | 1 |
| Unknown                                                                                | 3116.78 | 1 |
| tc Rep: Chromosome chr10 scaffold_297, whole genome shotgun sequence - Vitis vinifera  | 221.05  | 1 |
| gb KN6B.107N03F.060106T7 KN6B Nicotiana tabacum cDNA clone KN6B.107N03, mRNA           | 213.52  | 1 |
| tc Rep: CONSTANS interacting protein 2a - Solanum lycopersicum (Tomato) (Lycopersicon) | 5022.8  | 1 |
| Unknown                                                                                | 60.96   | 1 |
| gb AGN_ELP014xd23f1.ab1 AGN_ELP Nicotiana tabacum cDNA 5', mRNA sequence               | 2932.4  | 1 |
| gb KL5B.111A10F.060117T7 KL5B Nicotiana tabacum cDNA clone KL5B.111A10, mRNA           | 2602.24 | 1 |
| gb KT7C.110C22F.051221T7 KT7 Nicotiana tabacum cDNA clone KT7C.110C22, mRNA            | 924.02  | 1 |
| Unknown                                                                                | 202.65  | 1 |
| tc Rep: Protein kinase Pti1 - Glycine max (Soybean), partial (69%) [TC45973]           | 3030.78 | 1 |
| Unknown                                                                                | 16.08   | 1 |
| gb Nicotiana tabacum cDNA-AFLP-fragment BSTT22-1-360, cultivar Bright Yellow 2         | 84.35   | 1 |
| gb KN6B.105M18F.060104T7 KN6B Nicotiana tabacum cDNA clone KN6B.105M18, mRNA           | 24.81   | 1 |
| gb KR2B.108G23F.051229T7 KR2B Nicotiana tabacum cDNA clone KR2B.108G23, mRNA           | 973.01  | 1 |
| tc Rep: Chromosome chr18 scaffold_1, whole genome shotgun sequence - Vitis vinifera    | 58.25   | 1 |
| tc Rep: Mitochondrial import receptor subunit TOM7-1 - Solanum tuberosum (Potato)      | 176.37  | 1 |
| Unknown                                                                                | 68.19   | 1 |
| gb TL13.105M01F.060313T7 TL13 Nicotiana tabacum cDNA clone TL13.105M01, mRNA           | 122.57  | 1 |
| gb KG9B.003L11F.050720T7 KG9B Nicotiana tabacum cDNA clone KG9B.003L11, mRNA           | 39.8    | 1 |
| gb TOBESTR071C10 TOBEST cDNA library 1 Nicotiana tabacum cDNA 5', mRNA sequence        | 270.21  | 1 |

|                                                                                        |          |   |
|----------------------------------------------------------------------------------------|----------|---|
| Unknown                                                                                | 31.86    | 1 |
| Unknown                                                                                | 399.37   | 1 |
| gb KG9B.105B16F.051128T7 KG9B Nicotiana tabacum cDNA clone KG9B.105B16, r              | 35.05    | 1 |
| Unknown                                                                                | 30.75    | 1 |
| gb KL4B.107A04F.051126T7 KL4B Nicotiana tabacum cDNA clone KL4B.107A04, mF             | 510.88   | 1 |
| Unknown                                                                                | 24.9     | 1 |
| gb KN6B.104B18F.060103T7 KN6B Nicotiana tabacum cDNA clone KN6B.104B18, r              | 36.15    | 1 |
| tc Rep: 6,7-dimethyl-8-ribityllumazine synthase - Nicotiana tabacum (Common tob.       | 52.76    | 1 |
| tc Rep: Uncharacterized protein At2g43190.3 - Arabidopsis thaliana (Mouse-ear cre      | 269.05   | 1 |
| gb CHO_SL015xf10f2.ab1 CHO_SL Nicotiana tabacum cDNA, mRNA sequence [EH6:              | 72.89    | 1 |
| tc Rep: Chromosome undetermined scaffold_60, whole genome shotgun sequence             | 48.38    | 1 |
| Unknown                                                                                | 34.91    | 1 |
| gb KL4B.102B08F.051125T7 KL4B Nicotiana tabacum cDNA clone KL4B.102B08, mR             | 49.31    | 1 |
| Unknown                                                                                | 2994.36  | 1 |
| gb KN6B.108C13F.060106T7 KN6B Nicotiana tabacum cDNA clone KN6B.108C13, r              | 45.88    | 1 |
| gb KL4B.100G09F.050922T7 KL4B Nicotiana tabacum cDNA clone KL4B.100G09, mF             | 470.92   | 1 |
| tc Rep: Cytochrome b561 - Citrullus lanatus (Watermelon) (Citrullus vulgaris), parti   | 148.59   | 1 |
| gb TT-12_I21 tobacco leaf library Nicotiana tabacum cDNA, mRNA sequence [FG63          | 144.61   | 1 |
| Unknown                                                                                | 43.33    | 1 |
| tc Rep: Signal recognition particle receptor beta subunit-like protein - Arabidopsis t | 68.65    | 1 |
| tc Rep: Chromosome chr14 scaffold_21, whole genome shotgun sequence - Vitis vi         | 403.59   | 1 |
| gb KN6B.104I22F.060103T7 KN6B Nicotiana tabacum cDNA clone KN6B.104I22, mF             | 674.02   | 1 |
| gb AGN_PNL226df1_h12.trimmed.seq AGN_PNL Nicotiana tabacum cDNA 5', mRN.               | 2940.04  | 1 |
| gb KL4B.105A02F.051104T7 KL4B Nicotiana tabacum cDNA clone KL4B.105A02, mF             | 50.78    | 1 |
| gb AGN_RNC018xi16f1.ab1 AGN_RNC Nicotiana tabacum cDNA 5', mRNA sequenc                | 100.78   | 1 |
| Unknown                                                                                | 145.86   | 1 |
| gb KG9B.106H08F.051129T7 KG9B Nicotiana tabacum cDNA clone KG9B.106H08, n              | 133.77   | 1 |
| gb CHO_SL008xh08f1.ab1 CHO_SL Nicotiana tabacum cDNA, mRNA sequence [EH6               | 217.74   | 1 |
| gb AM836818 seedling library, SL Nicotiana tabacum cDNA clone nt002035064, mF          | 540.93   | 1 |
| gb KN6B.102M01F.051230T7 KN6B Nicotiana tabacum cDNA clone KN6B.102M01,                | 40191.75 | 1 |
| tc Rep: Chromosome chr7 scaffold_20, whole genome shotgun sequence - Vitis vin         | 63.49    | 1 |
| tc Rep: Non-intrinsic ABC protein - Nicotiana benthamiana, partial (30%) [TC71223]     | 107.5    | 1 |
| Unknown                                                                                | 31.07    | 1 |
| Unknown                                                                                | 23.83    | 1 |

|                                                                                        |         |   |
|----------------------------------------------------------------------------------------|---------|---|
| tc Rep: Chromosome chr2 scaffold_11, whole genome shotgun sequence - Vitis vin         | 1674.32 | 1 |
| gb KG9B.103F01F.051128T7 KG9B Nicotiana tabacum cDNA clone KG9B.103F01, m              | 256.76  | 1 |
| tc Rep: Chromosome chr6 scaffold_3, whole genome shotgun sequence - Vitis vinif        | 21.52   | 1 |
| tc Rep: Ubiquitin-like protein SMT3 - Oryza sativa subsp. japonica (Rice), partial (87 | 366.44  | 1 |
| Unknown                                                                                | 28.19   | 1 |
| gb Nicotiana tabacum mRNA for protein kinase 1 (pk1 gene) [AJ608156]                   | 211.79  | 1 |
| tc Rep: Endoplasmin homolog precursor - Catharanthus roseus (Rosy periwinkle) (N       | 19.4    | 1 |
| tc Rep: 50S ribosomal protein L3, chloroplast precursor - Nicotiana tabacum (Comn      | 18.58   | 1 |
| tc Rep: Chromosome chr4 scaffold_73, whole genome shotgun sequence - Vitis vin         | 91.16   | 1 |
| tc Rep: DEAD-box ATP-dependent RNA helicase 8 - Arabidopsis thaliana (Mouse-ear        | 126.12  | 1 |
| tc Rep: Chromosome chr15 scaffold_40, whole genome shotgun sequence - Vitis vi         | 26.34   | 1 |
| tc Rep: Peptide deformylase, chloroplast precursor - Solanum lycopersicum (Tomat       | 25.64   | 1 |
| gb Nicotiana tabacum ethylene-responsive element binding protein 5 mRNA, comp          | 532.45  | 1 |
| tc Rep: Allyl alcohol dehydrogenase - Nicotiana tabacum (Common tobacco), partic       | 89.2    | 1 |
| Unknown                                                                                | 6550.06 | 1 |
| Unknown                                                                                | 22.59   | 1 |
| tc Rep: Ubiquitin carrier protein - Vitis vinifera (Grape), partial (88%) [TC66484]    | 103.71  | 1 |
| Unknown                                                                                | 818.62  | 1 |
| Unknown                                                                                | 619.26  | 1 |
| gb AGN_RPC003xd07f1.ab1 AGN_RPC Nicotiana tabacum cDNA 5', mRNA sequenc                | 58.17   | 1 |
| tc Rep: Expressed protein - Arabidopsis thaliana (Mouse-ear cress), partial (5%) [TC   | 753.43  | 1 |
| gb KT7C.105B24F.051219T7 KT7 Nicotiana tabacum cDNA clone KT7C.105B24, mRI             | 1108.73 | 1 |
| Unknown                                                                                | 118.66  | 1 |
| tc Rep: NRC1 - Solanum lycopersicum (Tomato) (Lycopersicon esculentum), partial        | 35.5    | 1 |
| gb KG9B.004A05F.050721T7 KG9B Nicotiana tabacum cDNA clone KG9B.004A05, n              | 95.25   | 1 |
| tc Rep: Chromosome chr6 scaffold_25, whole genome shotgun sequence - Vitis vin         | 276.32  | 1 |
| gb KF8C.106P09F.051215T7 KF8 Nicotiana tabacum cDNA clone KF8C.106P09, mRN             | 935.35  | 1 |
| tc Rep: GDP dissociation inhibitor 1-like - Solanum tuberosum (Potato), partial (41%   | 285.7   | 1 |
| tc Rep: Chromosome undetermined scaffold_252, whole genome shotgun sequenc             | 159.49  | 1 |
| tc Rep: Glutathione peroxidase - Vitis vinifera (Grape), complete [TC72413]            | 4089.54 | 1 |
| Unknown                                                                                | 114.34  | 1 |
| tc Rep: 60S ribosomal protein L41 - Homo sapiens (Human), complete [TC69610]           | 219.89  | 1 |
| gb TT-15_P19 K326 late senescent leaf library Nicotiana tabacum cDNA, mRNA seq         | 80.37   | 1 |
| tc Rep: Chromosome undetermined scaffold_768, whole genome shotgun sequenc             | 95.01   | 1 |

|                                                                                      |          |   |
|--------------------------------------------------------------------------------------|----------|---|
| tc Rep: 40S ribosomal protein S15-like - Solanum tuberosum (Potato), complete [T     | 475.03   | 1 |
| gb KG9B.105G16F.051128T7 KG9B Nicotiana tabacum cDNA clone KG9B.105G16, n            | 1185.41  | 1 |
| Unknown                                                                              | 42.27    | 1 |
| gb Nicotiana tabacum inosine-5'-phosphate dehydrogenase (guaB) mRNA, partial c       | 50.4     | 1 |
| Unknown                                                                              | 23.04    | 1 |
| tc Rep: Chromosome chr8 scaffold_106, whole genome shotgun sequence - Vitis vi       | 121.91   | 1 |
| gb AM809865 DL, diurnal library Nicotiana tabacum cDNA clone nt005093022, mRI        | 74.06    | 1 |
| gb TOBESTR014E12 TOBEST cDNA library 1 Nicotiana tabacum cDNA 5', mRNA seq           | 88.22    | 1 |
| gb TT-12_L04 K326 late senescent leaf library Nicotiana tabacum cDNA, mRNA seq       | 67.09    | 1 |
| gb KG9B.102L17F.051126T7 KG9B Nicotiana tabacum cDNA clone KG9B.102L17, m            | 446.89   | 1 |
| tc Rep: Phosphate/phosphoenolpyruvate translocator - Nicotiana tabacum (Comm         | 51.74    | 1 |
| tc Rep: Chromosome chr9 scaffold_7, whole genome shotgun sequence - Vitis vinif      | 49809.75 | 1 |
| tc Rep: 26S protease regulatory subunit 6B homolog - Solanum tuberosum (Potato)      | 178.11   | 1 |
| Unknown                                                                              | 10302.3  | 1 |
| tc Rep: Protein translation factor SUI1 homolog - Sporobolus stapfianus (Ressurrecti | 289.78   | 1 |
| tc Rep: Chromosome chr5 scaffold_2, whole genome shotgun sequence - Vitis vinif      | 422.98   | 1 |
| tc Rep: Autophagy-related protein 3 - Arabidopsis thaliana (Mouse-ear cress), parti  | 25.34    | 1 |
| gb KF8C.102F16F.051214T7 KF8 Nicotiana tabacum cDNA clone KF8C.102F16, mRN           | 240.43   | 1 |
| tc Rep: Chromosome chr17 scaffold_16, whole genome shotgun sequence - Vitis vi       | 22.79    | 1 |
| Unknown                                                                              | 45.48    | 1 |
| gb KG9B.105H03F.051128T7 KG9B Nicotiana tabacum cDNA clone KG9B.105H03, n            | 1023.58  | 1 |
| gb Nicotiana tabacum CYI 1a mRNA, complete cds [AF019202]                            | 54.44    | 1 |
| tc Rep: 2-oxoacid dehydrogenase family protein - Arabidopsis thaliana, partial (55%  | 58.06    | 1 |
| tc Rep: Chromosome chr16 scaffold_271, whole genome shotgun sequence - Vitis v       | 1358.59  | 1 |
| Unknown                                                                              | 71.2     | 1 |
| Unknown                                                                              | 21.3     | 1 |
| tc Rep: Chromosome chr19 scaffold_4, whole genome shotgun sequence - Vitis vin       | 97.82    | 1 |
| Unknown                                                                              | 26.49    | 1 |
| tc Rep: Chromosome chr19 scaffold_4, whole genome shotgun sequence - Vitis vin       | 24.26    | 1 |
| Unknown                                                                              | 105.12   | 1 |
| Unknown                                                                              | 81.4     | 1 |
| Unknown                                                                              | 1359.37  | 1 |
| tc Rep: Chromosome chr5 scaffold_67, whole genome shotgun sequence - Vitis vin       | 69.06    | 1 |
| tc Rep: Chromosome chr1 scaffold_5, whole genome shotgun sequence - Vitis vinif      | 199.89   | 1 |



|                                                                                      |          |   |
|--------------------------------------------------------------------------------------|----------|---|
| Unknown                                                                              | 79.29    | 1 |
| Unknown                                                                              | 2975.16  | 1 |
| Unknown                                                                              | 2753.94  | 1 |
| Unknown                                                                              | 116.71   | 1 |
| tc Rep: Chromosome undetermined scaffold_69, whole genome shotgun sequence           | 10638.45 | 1 |
| tc Rep: ORF459 - Beta vulgaris subsp. vulgaris, partial (63%) [TC62558]              | 36.15    | 1 |
| tc Rep: Chromosome chr14 scaffold_21, whole genome shotgun sequence - Vitis vi       | 32.22    | 1 |
| tc Rep: Proteasome subunit alpha type - Solanum tuberosum (Potato), partial (98%     | 66.22    | 1 |
| gb KF8C.105J14F.051215T7 KF8 Nicotiana tabacum cDNA clone KF8C.105J14, mRN           | 2755.88  | 1 |
| gb Nicotiana tabacum mRNA for alpha-tubulin (tubA2 gene) [AJ421412]                  | 49053.45 | 1 |
| gb N.tabacum mRNA for voltage-dependent chloride channel [X95576]                    | 508.05   | 1 |
| tc Rep: Os11g0496400 protein - Oryza sativa subsp. japonica (Rice), partial (45%) [T | 5187.91  | 1 |
| gb KF8C.109O04F.051215T7 KF8 Nicotiana tabacum cDNA clone KF8C.109O04, mRI           | 6670.05  | 1 |
| Unknown                                                                              | 1126.79  | 1 |
| gb AGN_ELP006xa11f1.ab1 AGN_ELP Nicotiana tabacum cDNA 5', mRNA sequence             | 63.88    | 1 |
| gb Nicotiana tabacum DNA topoisomerase II mRNA, complete cds [AY169238]              | 55.7     | 1 |
| tc Rep: Glutamate/malate translocator - Nicotiana tabacum (Common tobacco), co       | 92.82    | 1 |
| Unknown                                                                              | 29.1     | 1 |
| gb TOBESTR046E09 TOBEST cDNA library 1 Nicotiana tabacum cDNA 5', mRNA sequ          | 82.1     | 1 |
| gb KF8C.102G18F.051214T7 KF8 Nicotiana tabacum cDNA clone KF8C.102G18, mRI           | 54122    | 1 |
| gb TT-21_L02 Samsun trichome library Nicotiana tabacum cDNA, mRNA sequence [         | 133.83   | 1 |
| Unknown                                                                              | 63.39    | 1 |
| tc Rep: Chromosome chr13 scaffold_17, whole genome shotgun sequence - Vitis vi       | 471.62   | 1 |
| gb KF8C.109G06F.051215T7 KF8 Nicotiana tabacum cDNA clone KF8C.109G06, mRI           | 25.62    | 1 |
| gb Nicotiana tabacum cDNA-AFLP fragment H-N_BT3M23-215 sequence [DQ46019             | 55.43    | 1 |
| gb KR3B.001D06F.050815T7 KR3B Nicotiana tabacum cDNA clone KR3B.001D06, m            | 222.37   | 1 |
| tc Rep: Hexose transporter 6 - Vitis vinifera (Grape), partial (50%) [TC56604]       | 143.11   | 1 |
| tc Rep: Chromosome chr12 scaffold_18, whole genome shotgun sequence - Vitis vi       | 33.25    | 1 |
| Unknown                                                                              | 8641.39  | 1 |
| tc MRARRHA M.racemosus (Zygomycetes) 25S ribosomal RNA gene, partial (9%) [T         | 661.06   | 1 |
| tc Rep: RPN9 - Nicotiana benthamiana, partial (43%) [TC52004]                        | 60.62    | 1 |
| Unknown                                                                              | 47.19    | 1 |
| Unknown                                                                              | 563      | 1 |
| tc Rep: Coatomer subunit epsilon-1 - Arabidopsis thaliana (Mouse-ear cress), parti   | 744.61   | 1 |

|                                                                                     |          |   |
|-------------------------------------------------------------------------------------|----------|---|
| tc Rep: Chromosome chr18 scaffold_1, whole genome shotgun sequence - Vitis vin      | 630.38   | 1 |
| Unknown                                                                             | 529.75   | 1 |
| Unknown                                                                             | 53.87    | 1 |
| gb KR3B.110K20F.051111T7 KR3B Nicotiana tabacum cDNA clone KR3B.110K20, m           | 30.11    | 1 |
| gb KP1B.107I22F.050726T7 KP1B Nicotiana tabacum cDNA clone KP1B.107I22, mRI         | 1404.7   | 1 |
| gb TT-40_F21 tobacco leaf library Nicotiana tabacum cDNA, mRNA sequence [FG63       | 76.87    | 1 |
| tc Rep: Chromosome undetermined scaffold_644, whole genome shotgun sequenc          | 261.56   | 1 |
| Unknown                                                                             | 67.6     | 1 |
| tc Rep: Pyridoxal kinase - Solanum tuberosum (Potato), partial (33%) [TC65370]      | 196.96   | 1 |
| gb KN6B.104P14F.060103T7 KN6B Nicotiana tabacum cDNA clone KN6B.104P14, r           | 31.31    | 1 |
| gb AGN_RNC011xk14r1.ab1 AGN_RNC Nicotiana tabacum cDNA 3', mRNA sequenc             | 40.36    | 1 |
| gb KR3B.105E09F.051109T7 KR3B Nicotiana tabacum cDNA clone KR3B.105E09, ml          | 49.04    | 1 |
| gb Nicotiana tabacum mRNA for NtSar1 protein, complete cds [D87821]                 | 11240.65 | 1 |
| Unknown                                                                             | 30.78    | 1 |
| tc Rep: Chromosome chr1 scaffold_5, whole genome shotgun sequence - Vitis vinif     | 135.77   | 1 |
| gb AGN_PNL211df1_f11.trimmed.seq AGN_PNL Nicotiana tabacum cDNA 5', mRN             | 40.7     | 1 |
| tc Rep: Peptidyl-prolyl cis-trans isomerase 1 - Malus domestica (Apple) (Malus sylv | 24       | 1 |
| tc Rep: Ribosomal protein L24E - Medicago truncatula (Barrel medic), complete [TC   | 384.43   | 1 |
| gb AM792691 DL, diurnal library Nicotiana tabacum cDNA clone nt005153020, mRI       | 67.2     | 1 |
| Unknown                                                                             | 20.43    | 1 |
| tc Rep: Chromosome chr1 scaffold_5, whole genome shotgun sequence - Vitis vinif     | 336.82   | 1 |
| Unknown                                                                             | 207.28   | 1 |
| gb KT7B.107O17F.060124T7 KT7 Nicotiana tabacum cDNA clone KT7B.107O17, mR           | 2789.26  | 1 |
| tc Rep: Mitochondrial ribosomal protein S13 - Nicotiana tabacum (Common tobacc      | 95.96    | 1 |
| gb TOBESTR057D10 TOBEST cDNA library 1 Nicotiana tabacum cDNA 5', mRNA seq          | 159.73   | 1 |
| tc Rep: Chromosome chr4 scaffold_443, whole genome shotgun sequence - Vitis vi      | 73.78    | 1 |
| Unknown                                                                             | 46.81    | 1 |
| tc Rep: Chromosome chr7 scaffold_42, whole genome shotgun sequence - Vitis vin      | 104.57   | 1 |
| tc Rep: F3O9.16 - Arabidopsis thaliana (Mouse-ear cress), partial (48%) [TC63404]   | 379.84   | 1 |
| tc Rep: Sulfite reductase - Nicotiana tabacum (Common tobacco), partial (16%) [TC   | 3387.09  | 1 |
| Unknown                                                                             | 230.26   | 1 |
| gb AGN_RPC015xj05f1.ab1 AGN_RPC Nicotiana tabacum cDNA 5', mRNA sequence            | 31.91    | 1 |
| gb TT-05_N04 K326 trichome library Nicotiana tabacum cDNA, mRNA sequence [FC        | 44.55    | 1 |
| tc Rep: Alpha-tubulin - Nicotiana tabacum (Common tobacco), complete [TC41070]      | 42134.85 | 1 |

|                                                                                   |          |   |
|-----------------------------------------------------------------------------------|----------|---|
| tc Rep: RNA-binding protein RZ-1 - Nicotiana glauca (Wood tobacco), complete [    | 964.07   | 1 |
| gb KF8C.101J22F.051214T7 KF8 Nicotiana tabacum cDNA clone KF8C.101J22, mRN        | 383.11   | 1 |
| tc Rep: Ferric-chelate reductase - Solanum lycopersicum (Tomato) (Lycopersicon es | 28.15    | 1 |
| Unknown                                                                           | 18041.45 | 1 |
| tc Rep: Ribosomal protein S6-like protein - Solanum tuberosum (Potato), complete  | 223.13   | 1 |
| gb Nicotiana tabacum TORK1 mRNA for potassium channel TORK1, complete cds [A      | 29.86    | 1 |
| gb AGN_RNC005xe12f1.ab1 AGN_RNC Nicotiana tabacum cDNA 5', mRNA sequenc           | 49.39    | 1 |
| Unknown                                                                           | 519.93   | 1 |
| gb CHO_SL004xl02f1.ab1 CHO_SL Nicotiana tabacum cDNA, mRNA sequence [EH61         | 43.75    | 1 |
| gb AGN_RNC012xp06f1.ab1 AGN_RNC Nicotiana tabacum cDNA 5', mRNA sequenc           | 377.79   | 1 |
| Unknown                                                                           | 118.78   | 1 |
| gb AGN_RNC129xb18r1.ab1 AGN_RNC Nicotiana tabacum cDNA 3', mRNA sequenc           | 25.93    | 1 |
| Unknown                                                                           | 88.2     | 1 |
| Unknown                                                                           | 48.75    | 1 |
| gb KF8B.202J14F.060124T7 KF8 Nicotiana tabacum cDNA clone KF8B.202J14, mRN        | 1482.54  | 1 |
| gb Nicotiana tabacum mRNA, complete cds, 1290 bp sequence [AB024511]              | 511.84   | 1 |
| gb AGN_ELP022xg17f1.ab1 AGN_ELP Nicotiana tabacum cDNA 5', mRNA sequence          | 35.45    | 1 |
| gb KP1B.102P01F.050722T7 KP1B Nicotiana tabacum cDNA clone KP1B.102P01, mF        | 24.85    | 1 |
| Unknown                                                                           | 134.39   | 1 |
| gb BL12.101D20F.060309T7 BL12 Nicotiana tabacum cDNA clone BL12.101D20, mF        | 29.65    | 1 |
| tc Rep: Chromosome chr15 scaffold_40, whole genome shotgun sequence - Vitis vi    | 29.07    | 1 |
| Unknown                                                                           | 24.35    | 1 |
| gb KR3B.107D17F.051110T7 KR3B Nicotiana tabacum cDNA clone KR3B.107D17, m         | 32.12    | 1 |
| tc Rep: 60S ribosomal protein L7A-like protein - Solanum tuberosum (Potato), com  | 30.66    | 1 |
| gb AGN_RNC024xc18f1.ab1 AGN_RNC Nicotiana tabacum cDNA 5', mRNA sequenc           | 6535.26  | 1 |
| tc Rep: Vacuolar H(+)-ATPase subunit B - Suaeda salsa (Seepweed) (Chenopodium s   | 303.81   | 1 |
| gb TT-11_H13 K326 late senescent leaf library Nicotiana tabacum cDNA, mRNA seq    | 1132.91  | 1 |
| tc Rep: Chromosome chr15 scaffold_37, whole genome shotgun sequence - Vitis vi    | 195.21   | 1 |
| gb N.tabacum Nthsp70 mRNA for heat shock protein 70 [X63106]                      | 33.73    | 1 |
| gb AGN_RPC005xl10f1.ab1 AGN_RPC Nicotiana tabacum cDNA 5', mRNA sequence          | 19.98    | 1 |
| gb KL4B.111A04F.060128T7 KL4B Nicotiana tabacum cDNA clone KL4B.111A04, mF        | 35.42    | 1 |
| Unknown                                                                           | 181.12   | 1 |
| gb KG9B.105B20F.051128T7 KG9B Nicotiana tabacum cDNA clone KG9B.105B20, r         | 1901.48  | 1 |
| tc Rep: Chromosome chr14 scaffold_9, whole genome shotgun sequence - Vitis vin    | 29.57    | 1 |

|                                                                                      |         |   |
|--------------------------------------------------------------------------------------|---------|---|
| tc Rep: Chromosome chr16 scaffold_10, whole genome shotgun sequence - Vitis vi       | 44.26   | 1 |
| gb CHO_SL028xk23f1.ab1 CHO_SL Nicotiana tabacum cDNA, mRNA sequence [EH6             | 473.62  | 1 |
| tc Rep: Chromosome chr15 scaffold_40, whole genome shotgun sequence - Vitis vi       | 563.58  | 1 |
| Unknown                                                                              | 203.74  | 1 |
| gb KG9B.001G15F.050628T7 KG9B Nicotiana tabacum cDNA clone KG9B.001G15, n            | 1844.69 | 1 |
| Unknown                                                                              | 1921.39 | 1 |
| tc Rep: Chromosome chr2 scaffold_105, whole genome shotgun sequence - Vitis vi       | 179.6   | 1 |
| Unknown                                                                              | 21.61   | 1 |
| tc Rep: Ubiquitin-conjugating enzyme E2-17 kDa - Solanum lycopersicum (Tomato)       | 1271.08 | 1 |
| tc Rep: Chromosome chr8 scaffold_99, whole genome shotgun sequence - Vitis vin       | 25.82   | 1 |
| tc Rep: Chromosome chr14 scaffold_9, whole genome shotgun sequence - Vitis vin       | 82.24   | 1 |
| Unknown                                                                              | 2496.86 | 1 |
| gb Tobacco (N.tabacum) GapA mRNA encoding A-subunit of chloroplast glyceradeh        | 21.25   | 1 |
| Unknown                                                                              | 379.77  | 1 |
| tc Rep: Chromosome chr9 scaffold_7, whole genome shotgun sequence - Vitis vinif      | 83.54   | 1 |
| Unknown                                                                              | 135.62  | 1 |
| Unknown                                                                              | 32.46   | 1 |
| gb TT-36_B15 Samsun trichome library Nicotiana tabacum cDNA, mRNA sequence           | 81.35   | 1 |
| gb AGN_RPC006xp21f1.ab1 AGN_RPC Nicotiana tabacum cDNA 5', mRNA sequenc              | 155.65  | 1 |
| gb Nicotiana tabacum kinesin-like protein (tck1) mRNA, complete cds [U52078]         | 112.48  | 1 |
| gb KL4B.103C22F.051103T7 KL4B Nicotiana tabacum cDNA clone KL4B.103C22, mR           | 54.39   | 1 |
| gb FS382718 normalized full-length tobacco cDNA library Nicotiana tabacum cDNA       | 91.71   | 1 |
| tc Rep: Formate--tetrahydrofolate ligase - Spinacia oleracea (Spinach), partial (25% | 147.65  | 1 |
| gb KG9B.107B23F.060120T7 KG9B Nicotiana tabacum cDNA clone KG9B.107B23, n            | 87.8    | 1 |
| gb TT-04_H10 K326 late senescent leaf library Nicotiana tabacum cDNA, mRNA seq       | 24.86   | 1 |
| Unknown                                                                              | 56.81   | 1 |
| gb BP528671 MAT001 Nicotiana tabacum cDNA clone BY13532, mRNA sequence [E            | 143.46  | 1 |
| gb AGN_RNC020xb11f1.ab1 AGN_RNC Nicotiana tabacum cDNA 5', mRNA sequenc              | 18.14   | 1 |
| Unknown                                                                              | 22.84   | 1 |
| gb Nicotiana tabacum mRNA for putative reductase (MC118 gene) [AM851011]             | 44.77   | 1 |
| tc Rep: Brain and reproductive organ-expressed protein-like - Arabidopsis thaliana   | 23.58   | 1 |
| gb AGN_RNC107xa04r1.ab1 AGN_RNC Nicotiana tabacum cDNA 3', mRNA sequenc              | 18.71   | 1 |
| tc Rep: Thioredoxin peroxidase - Nicotiana tabacum (Common tobacco), partial (85     | 44.05   | 1 |
| tc Rep: 40S ribosomal protein S12 - Vitis vinifera (Grape), partial (96%) [TC67348]  | 31.34   | 1 |

|                                                                                    |         |   |
|------------------------------------------------------------------------------------|---------|---|
| gb EST_FLW002xp07f1.ab1 EST_FLW Nicotiana tabacum cDNA, mRNA sequence [Ei          | 32.74   | 1 |
| tc Rep: Ci21A protein - Solanum tuberosum (Potato), partial (94%) [TC69256]        | 346.69  | 1 |
| Unknown                                                                            | 951.46  | 1 |
| gb TT-31_J19 K326 trichome library Nicotiana tabacum cDNA, mRNA sequence [FG       | 26.46   | 1 |
| Unknown                                                                            | 62.62   | 1 |
| tc Rep: ATP:citrate lyase - Capsicum annuum (Bell pepper), partial (76%) [TC45257] | 31.66   | 1 |
| tc Rep: Triosephosphate isomerase, chloroplast precursor - Fragaria ananassa (Stra | 3973.99 | 1 |
| tc Rep: Chromosome chr3 scaffold_8, whole genome shotgun sequence - Vitis vinif    | 158.18  | 1 |
| tc Rep: Chromosome undetermined scaffold_1331, whole genome shotgun sequen         | 203.78  | 1 |
| Unknown                                                                            | 159.79  | 1 |
| Unknown                                                                            | 103.78  | 1 |
| Unknown                                                                            | 150.51  | 1 |
| Unknown                                                                            | 897.25  | 1 |
| gb TT-05_M07 K326 late senescent leaf library Nicotiana tabacum cDNA, mRNA sec     | 143.74  | 1 |
| gb FS409145 normalized full-length tobacco cDNA library Nicotiana tabacum cDNA     | 21.19   | 1 |
| gb AM840564 seedling library, SL Nicotiana tabacum cDNA clone nt002013085, mF      | 162.77  | 1 |
| gb KG9B.105O22F.051128T7 KG9B Nicotiana tabacum cDNA clone KG9B.105O22, r          | 3338    | 1 |
| tc Rep: Chromosome chr11 scaffold_13, whole genome shotgun sequence - Vitis vi     | 27.74   | 1 |
| tc Rep: Chromosome chr14 scaffold_21, whole genome shotgun sequence - Vitis vi     | 70.83   | 1 |
| Unknown                                                                            | 545.72  | 1 |
| Unknown                                                                            | 502.67  | 1 |
| gb KR3B.110K16F.051111T7 KR3B Nicotiana tabacum cDNA clone KR3B.110K16, ml         | 37.7    | 1 |
| gb TT-27_D09 tobacco leaf library Nicotiana tabacum cDNA, mRNA sequence [FG6:      | 370.55  | 1 |
| Unknown                                                                            | 53.94   | 1 |
| gb KP1B.107G01F.050726T7 KP1B Nicotiana tabacum cDNA clone KP1B.107G01, m          | 91.48   | 1 |
| tc Rep: Chromosome chr9 scaffold_7, whole genome shotgun sequence - Vitis vinif    | 58.89   | 1 |
| tc Rep: Chromosome chr4 scaffold_32, whole genome shotgun sequence - Vitis vin     | 189.36  | 1 |
| gb KP1B.108G24F.050726T7 KP1B Nicotiana tabacum cDNA clone KP1B.108G24, m          | 2623.76 | 1 |
| tc Rep: Lactoylglutathione lyase - Solanum lycopersicum (Tomato) (Lycopersicon es  | 507.08  | 1 |
| tc Rep: DNA-directed RNA polymerase IIb - Nicotiana tabacum (Common tobacco),      | 57.55   | 1 |
| gb AGN_RNC116xg16f1.ab1 AGN_RNC Nicotiana tabacum cDNA 5', mRNA sequenc            | 18.57   | 1 |
| Unknown                                                                            | 497.48  | 1 |
| Unknown                                                                            | 24.93   | 1 |
| tc Rep: 40S ribosomal protein S23 - Fragaria ananassa (Strawberry), complete [TC5i | 113.96  | 1 |

|                                                                                     |         |   |
|-------------------------------------------------------------------------------------|---------|---|
| Unknown                                                                             | 85.84   | 1 |
| gb KR3B.105C01F.051109T7 KR3B Nicotiana tabacum cDNA clone KR3B.105C01, m           | 522.39  | 1 |
| gb AM780197 seedling library, SL Nicotiana tabacum cDNA clone nt002317013, mF       | 54.5    | 1 |
| tc Rep: Chromosome chr5 scaffold_67, whole genome shotgun sequence - Vitis vin      | 204.86  | 1 |
| tc Rep: Spermidine synthase 1 - Datura stramonium (Jimsonweed) (Common thorn.       | 942.64  | 1 |
| Unknown                                                                             | 75.78   | 1 |
| tc Rep: Class II small heat shock protein Le-HSP17.6 - Solanum lycopersicum (Toma   | 180.97  | 1 |
| gb CHO_SL028xe24f1.ab1 CHO_SL Nicotiana tabacum cDNA, mRNA sequence [EH6            | 35.23   | 1 |
| gb KF8C.103J18F.051214T7 KF8 Nicotiana tabacum cDNA clone KF8C.103J18, mRN,         | 2709.88 | 1 |
| gb KP1B.108G15F.050726T7 KP1B Nicotiana tabacum cDNA clone KP1B.108G15, m           | 35.68   | 1 |
| tc Rep: Genomic DNA, chromosome 5, TAC clone:K2A18 - Arabidopsis thaliana (Mo       | 203.85  | 1 |
| Unknown                                                                             | 59.11   | 1 |
| gb AGN_RNC017xd14f1.ab1 AGN_RNC Nicotiana tabacum cDNA 5', mRNA sequenc             | 2925.97 | 1 |
| gb ntsm10 embryogenic microspores Nicotiana tabacum cDNA, mRNA sequence [E          | 177.11  | 1 |
| Unknown                                                                             | 8875.84 | 1 |
| tc Rep: AT3g42050/F4M19_10 - Arabidopsis thaliana (Mouse-ear cress), complete       | 212.63  | 1 |
| Unknown                                                                             | 140.73  | 1 |
| Unknown                                                                             | 247.76  | 1 |
| gb KG9B.002E03F.050720T7 KG9B Nicotiana tabacum cDNA clone KG9B.002E03, m           | 1171.93 | 1 |
| gb TT-36_P10 Samsun trichome library Nicotiana tabacum cDNA, mRNA sequence          | 109.87  | 1 |
| Unknown                                                                             | 63.44   | 1 |
| tc Rep: Chromosome chr15 scaffold_82, whole genome shotgun sequence - Vitis vi      | 63.32   | 1 |
| Unknown                                                                             | 86.33   | 1 |
| gb KL4B.112M07F.060131T7 KL4B Nicotiana tabacum cDNA clone KL4B.112M07, m           | 167.77  | 1 |
| gb AGN_PNL226bf1_d6.trimmed.seq AGN_PNL Nicotiana tabacum cDNA 5', mRNA             | 33.82   | 1 |
| Unknown                                                                             | 234.18  | 1 |
| Unknown                                                                             | 28.54   | 1 |
| gb AM794263 COL, cold overnight library Nicotiana tabacum cDNA clone nt006206       | 97.5    | 1 |
| Unknown                                                                             | 996.31  | 1 |
| Unknown                                                                             | 27.65   | 1 |
| gb KG9B.102E19F.051126T7 KG9B Nicotiana tabacum cDNA clone KG9B.102E19, m           | 100.65  | 1 |
| Unknown                                                                             | 378.03  | 1 |
| gb Nicotiana tabacum mRNA for gamma tubulin (gtub gene) [AJ278739]                  | 35.53   | 1 |
| tc Rep: Predicted protein - Physcomitrella patens subsp. patens, partial (25%) [TC6 | 207.17  | 1 |

|                                                                                   |         |   |
|-----------------------------------------------------------------------------------|---------|---|
| Unknown                                                                           | 183.15  | 1 |
| tc Rep: Chromosome chr1 scaffold_84, whole genome shotgun sequence - Vitis vin    | 167.66  | 1 |
| Unknown                                                                           | 27.44   | 1 |
| gb CHO_SL002xi14f1.ab1 CHO_SL Nicotiana tabacum cDNA, mRNA sequence [EH62         | 431.24  | 1 |
| gb TT-06_M07 K326 late senescent leaf library Nicotiana tabacum cDNA, mRNA seq    | 69.28   | 1 |
| Unknown                                                                           | 284.49  | 1 |
| gb TOBESTR120F08 TOBEST cDNA library 1 Nicotiana tabacum cDNA 5', mRNA sequ       | 168.21  | 1 |
| tc Rep: Phosphoenolpyruvate carboxylase - Nicotiana sylvestris (Wood tobacco), pa | 98.14   | 1 |
| Unknown                                                                           | 23.04   | 1 |
| gb CHO_SL015xj07f2.ab1 CHO_SL Nicotiana tabacum cDNA, mRNA sequence [EH61         | 120.75  | 1 |
| gb KR3B.112M13F.060119T7 KR3B Nicotiana tabacum cDNA clone KR3B.112M13, r         | 250.77  | 1 |
| gb TT-06_A07 Samsun trichome library Nicotiana tabacum cDNA, mRNA sequence        | 54.98   | 1 |
| tc Rep: Chromosome chr9 scaffold_7, whole genome shotgun sequence - Vitis vinif   | 29.94   | 1 |
| Unknown                                                                           | 40.57   | 1 |
| tc Rep: Chromosome undetermined scaffold_114, whole genome shotgun sequenc        | 50.54   | 1 |
| Unknown                                                                           | 21.59   | 1 |
| gb KF8C.104G19F.051214T7 KF8 Nicotiana tabacum cDNA clone KF8C.104G19, mRI        | 1650.45 | 1 |
| tc Rep: Chromosome chr14 scaffold_21, whole genome shotgun sequence - Vitis vi    | 4138.79 | 1 |
| tc Rep: Chromosome chr8 scaffold_23, whole genome shotgun sequence - Vitis vin    | 232.51  | 1 |
| gb AGN_ELP012xa10f1.ab1 AGN_ELP Nicotiana tabacum cDNA 5', mRNA sequence          | 27.96   | 1 |
| Unknown                                                                           | 23.76   | 1 |
| Unknown                                                                           | 49.47   | 1 |
| gb Nicotiana tabacum cultivar Samsun respiratory burst oxidase protein mRNA, par  | 536.31  | 1 |
| gb KF8C.110N22F.051216T7 KF8 Nicotiana tabacum cDNA clone KF8C.110N22, mRI        | 75.81   | 1 |
| Unknown                                                                           | 548.8   | 1 |
| gb TT-12_O24 Burley21 trichome library Nicotiana tabacum cDNA, mRNA sequenc       | 640.37  | 1 |
| Unknown                                                                           | 2539.65 | 1 |
| tc Rep: Chromosome chr10 scaffold_43, whole genome shotgun sequence - Vitis vi    | 1083.94 | 1 |
| Unknown                                                                           | 136.42  | 1 |
| tc Rep: B2-type cyclin dependent kinase - Solanum lycopersicum (Tomato) (Lycoper  | 100.1   | 1 |
| gb KR3B.105H05F.051109T7 KR3B Nicotiana tabacum cDNA clone KR3B.105H05, m         | 3969.89 | 1 |
| tc Rep: Pyruvate decarboxylase - Solanum tuberosum (Potato), complete [TC48760    | 22.03   | 1 |
| gb AGN_RNC009xg01f1.ab1 AGN_RNC Nicotiana tabacum cDNA 5', mRNA sequenc           | 904.6   | 1 |
| Unknown                                                                           | 5812.16 | 1 |

|                                                                                       |         |   |
|---------------------------------------------------------------------------------------|---------|---|
| gb KG9B.101D11F.060120T7 KG9B Nicotiana tabacum cDNA clone KG9B.101D11, n             | 816.06  | 1 |
| gb KT7B.107P18F.060124T7 KT7 Nicotiana tabacum cDNA clone KT7B.107P18, mRf            | 30.59   | 1 |
| gb KR2B.115F20F.051230T7 KR2B Nicotiana tabacum cDNA clone KR2B.115F20, mF            | 49.13   | 1 |
| tc Rep: AT4g05320/C17L7_240 - Arabidopsis thaliana (Mouse-ear cress), partial (98     | 3951.3  | 1 |
| gb AGN_ELP010xd20f1.ab1 AGN_ELP Nicotiana tabacum cDNA 5', mRNA sequence              | 113.72  | 1 |
| gb KR2B.102E02F.051227T7 KR2B Nicotiana tabacum cDNA clone KR2B.102E02, ml            | 46.3    | 1 |
| gb TT-03_F07 tobacco leaf library Nicotiana tabacum cDNA, mRNA sequence [FG63         | 184.36  | 1 |
| Unknown                                                                               | 515.19  | 1 |
| tc Rep: Arginine decarboxylase 1 - Nicotiana tabacum (Common tobacco), partial (2     | 3581.77 | 1 |
| Unknown                                                                               | 32.95   | 1 |
| tc Rep: AGAP000318-PA - Anopheles gambiae str. PEST, partial (9%) [TC72511]           | 71.02   | 1 |
| tc Rep: Chromosome chr4 scaffold_39, whole genome shotgun sequence - Vitis vin        | 100.25  | 1 |
| gb KT7C.104G18F.051219T7 KT7 Nicotiana tabacum cDNA clone KT7C.104G18, mR             | 1433.18 | 1 |
| tc Rep: CDPK-like protein - Solanum tuberosum (Potato), partial (77%) [TC63214]       | 22.97   | 1 |
| tc Rep: 1,4-alpha-glucan-maltohydrolase - Solanum lycopersicum (Tomato) (Lycopers     | 255.07  | 1 |
| gb KP1B.108I18F.050726T7 KP1B Nicotiana tabacum cDNA clone KP1B.108I18, mRf           | 57.28   | 1 |
| gb AGN_ELP019xm04f1.ab1 AGN_ELP Nicotiana tabacum cDNA 5', mRNA sequence              | 79.8    | 1 |
| Unknown                                                                               | 38.28   | 1 |
| Unknown                                                                               | 28.7    | 1 |
| tc Rep: Xaa-Pro aminopeptidase 2 - Solanum lycopersicum (Tomato) (Lycopersicon        | 1101.58 | 1 |
| tc Rep: Chromosome chr19 scaffold_66, whole genome shotgun sequence - Vitis vi        | 1896.5  | 1 |
| Unknown                                                                               | 22.76   | 1 |
| tc Rep: Chromosome chr9 scaffold_7, whole genome shotgun sequence - Vitis vinif       | 1024.18 | 1 |
| gb N.tabacum mRNA for transformer-SR ribonucleoprotein [Y09506]                       | 396.31  | 1 |
| Unknown                                                                               | 1048.33 | 1 |
| Unknown                                                                               | 1504.87 | 1 |
| tc Rep: Chromosome chr19 scaffold_35, whole genome shotgun sequence - Vitis vi        | 138.65  | 1 |
| gb AM806329 seedling library, SL Nicotiana tabacum cDNA clone nt002240007, mF         | 33.72   | 1 |
| gb KG9B.101O02F.060120T7 KG9B Nicotiana tabacum cDNA clone KG9B.101O02, r             | 2852.49 | 1 |
| gb AGN_RNC023xe15f1.ab1 AGN_RNC Nicotiana tabacum cDNA 5', mRNA sequenc               | 32.37   | 1 |
| tc Rep: Ubiquitin carboxyl-terminal hydrolase - Vitis vinifera (Grape), partial (23%) | 202.9   | 1 |
| gb AGN_RNC005xf04f1.ab1 AGN_RNC Nicotiana tabacum cDNA 5', mRNA sequenc               | 870.66  | 1 |
| gb TT-07_G15 tobacco leaf library Nicotiana tabacum cDNA, mRNA sequence [FG6:         | 65.66   | 1 |
| Unknown                                                                               | 105.76  | 1 |



|                                                                                    |          |   |
|------------------------------------------------------------------------------------|----------|---|
| gb Nicotiana tabacum putative chloroplast thiazole biosynthetic protein (ThiI) mRN | 41.86    | 1 |
| tc Rep: Chromosome chr12 scaffold_38, whole genome shotgun sequence - Vitis vi     | 257.53   | 1 |
| gb Nicotiana tabacum heterotrimeric GTP-binding protein subunit beta 1 mRNA, cc    | 41.4     | 1 |
| gb AB257509 MAT001 Nicotiana tabacum cDNA clone BY4861 similar to KED, mRN         | 181.74   | 1 |
| gb Nicotiana tabacum cyclin-dependent kinase B1-2 (CdkB1-2) mRNA, complete cd      | 18.59    | 1 |
| gb KT7B.100M14F.051010T7 KT7 Nicotiana tabacum cDNA clone KT7B.100M14, ml          | 522.19   | 1 |
| tc Rep: Chromosome chr2 scaffold_112, whole genome shotgun sequence - Vitis vi     | 222.25   | 1 |
| tc Rep: Chromosome chr2 scaffold_132, whole genome shotgun sequence - Vitis vi     | 509.47   | 1 |
| tc Rep: T23O15.3/T23O15.3 - Arabidopsis thaliana (Mouse-ear cress), partial (33%)  | 1568.58  | 1 |
| tc Rep: Endomembrane protein EMP70 precursor isolog; 68664-64364 - Arabidopsis     | 4462.03  | 1 |
| gb CHO_SL007xb23f1.ab1 CHO_SL Nicotiana tabacum cDNA, mRNA sequence [EH6           | 1559.08  | 1 |
| tc Rep: Silicatein - Halichondria okadai (Marine sponge), partial (15%) [TC67373]  | 240.52   | 1 |
| tc Rep: Chromosome chr1 scaffold_5, whole genome shotgun sequence - Vitis vinif    | 4995.82  | 1 |
| tc Rep: Chromosome undetermined scaffold_147, whole genome shotgun sequenc         | 478.89   | 1 |
| Unknown                                                                            | 56.47    | 1 |
| tc Rep: Aspartic proteinase precursor - Cucurbita pepo (Vegetable marrow) (Summ    | 19285.8  | 1 |
| gb Nicotiana tabacum anther-specific myb-related protein 2 (mybAS2) mRNA, com      | 1099.82  | 1 |
| Unknown                                                                            | 284.28   | 1 |
| tc Rep: Chromosome chr7 scaffold_31, whole genome shotgun sequence - Vitis vin     | 750.32   | 1 |
| Unknown                                                                            | 19.84    | 1 |
| tc Rep: Chromosome chr6 scaffold_3, whole genome shotgun sequence - Vitis vinif    | 1521.83  | 1 |
| gb KL4B.103I18F.051103T7 KL4B Nicotiana tabacum cDNA clone KL4B.103I18, mRN        | 38969.75 | 1 |
| gb AGN_RNC008xk13f1.ab1 AGN_RNC Nicotiana tabacum cDNA 5', mRNA sequenc            | 100.4    | 1 |
| gb KL4B.100C09F.050922T7 KL4B Nicotiana tabacum cDNA clone KL4B.100C09, mR         | 21098.3  | 1 |
| gb CB_NPSSHcDNA_26 CB_NPSSHcDNA Library Nicotiana tabacum cDNA clone NP2           | 621.57   | 1 |
| Unknown                                                                            | 19.92    | 1 |
| tc Rep: Cytochrome b5 - Nicotiana tabacum (Common tobacco), complete [TC7205       | 4758.8   | 1 |
| gb BP534328 MAT005 Nicotiana tabacum cDNA clone BY32285, mRNA sequence [E          | 34.03    | 1 |
| Unknown                                                                            | 41.5     | 1 |
| gb TT-06_I16 K326 trichome library Nicotiana tabacum cDNA, mRNA sequence [FGI      | 58.38    | 1 |
| tc Rep: Chromosome chr18 scaffold_1, whole genome shotgun sequence - Vitis vin     | 3374.37  | 1 |
| gb KG9B.004E04F.050721T7 KG9B Nicotiana tabacum cDNA clone KG9B.004E04, m          | 153.2    | 1 |
| Unknown                                                                            | 22.21    | 1 |
| Unknown                                                                            | 291.98   | 1 |

|                                                                                      |         |   |
|--------------------------------------------------------------------------------------|---------|---|
| Unknown                                                                              | 336.15  | 1 |
| tc Rep: Aspartate aminotransferase - Vitis vinifera (Grape), partial (97%) [TC43521] | 151.31  | 1 |
| Unknown                                                                              | 61.05   | 1 |
| gb KF8C.104F20F.051214T7 KF8 Nicotiana tabacum cDNA clone KF8C.104F20, mRN           | 37007.2 | 1 |
| Unknown                                                                              | 23.97   | 1 |
| Unknown                                                                              | 2774.29 | 1 |
| gb KR3B.109F13F.051111T7 KR3B Nicotiana tabacum cDNA clone KR3B.109F13, mF           | 59.5    | 1 |
| tc Rep: Fumarylacetoacetase - Medicago truncatula (Barrel medic), partial (55%) [T   | 31      | 1 |
| gb KL4B.102A12F.051125T7 KL4B Nicotiana tabacum cDNA clone KL4B.102A12, mF           | 243.01  | 1 |
| tc Rep: Chromosome chr1 scaffold_5, whole genome shotgun sequence - Vitis vinif      | 590.91  | 1 |
| Unknown                                                                              | 93.94   | 1 |
| tc Rep: BTF3 - Nicotiana benthamiana, complete [TC68489]                             | 32.49   | 1 |
| Unknown                                                                              | 21.59   | 1 |
| Unknown                                                                              | 25.08   | 1 |
| tc Rep: Chromosome chr7 scaffold_44, whole genome shotgun sequence - Vitis vin       | 20.47   | 1 |
| Unknown                                                                              | 70.82   | 1 |
| Unknown                                                                              | 87      | 1 |
| gb KT7C.110F03F.051221T7 KT7 Nicotiana tabacum cDNA clone KT7C.110F03, mRN           | 225.57  | 1 |
| gb TT-40_K09 K326 early senescent leaf library Nicotiana tabacum cDNA, mRNA se       | 291.93  | 1 |
| gb KT7B.103H05F.060124T7 KT7 Nicotiana tabacum cDNA clone KT7B.103H05, mR            | 38.49   | 1 |
| gb BL12.001C03F.060117T7 BL12 Nicotiana tabacum cDNA clone BL12.001C03, mR           | 82.01   | 1 |
| tc Rep: DCK/dGK-like deoxyribonucleoside kinase - Solanum lycopersicum (Tomato       | 28.72   | 1 |
| tc Rep: Chromosome undetermined scaffold_91, whole genome shotgun sequence           | 136.77  | 1 |
| Unknown                                                                              | 105.69  | 1 |
| gb AGN_RPC015xi03f1.ab1 AGN_RPC Nicotiana tabacum cDNA 5', mRNA sequence             | 91.99   | 1 |
| gb AGN_PNL210af1_f11.trimmed.seq AGN_PNL Nicotiana tabacum cDNA 5', mRNA             | 68.69   | 1 |
| gb CHO_SL013xg13f1.ab1 CHO_SL Nicotiana tabacum cDNA, mRNA sequence [EH6             | 184     | 1 |
| gb TT-06_N13 K326 late senescent leaf library Nicotiana tabacum cDNA, mRNA seq       | 422.6   | 1 |
| Unknown                                                                              | 50.64   | 1 |
| gb Nicotiana tabacum mRNA for mitochondrial 2-oxoglutarate [AJ299250]                | 1576.9  | 1 |
| Unknown                                                                              | 27.35   | 1 |
| tc Rep: Ubiquitin carrier protein - Gossypium hirsutum (Upland cotton) (Gossypium    | 1392.25 | 1 |
| tc Rep: Chromosome chr5 scaffold_124, whole genome shotgun sequence - Vitis vi       | 35.33   | 1 |
| gb KG9B.105I20F.051128T7 KG9B Nicotiana tabacum cDNA clone KG9B.105I20, mR           | 25.84   | 1 |

|                                                                                       |         |   |
|---------------------------------------------------------------------------------------|---------|---|
| Unknown                                                                               | 31.38   | 1 |
| gb CHO_SL022xp22f1.ab1 CHO_SL Nicotiana tabacum cDNA, mRNA sequence [EH6              | 95.88   | 1 |
| gb KL4B.111M23F.060128T7 KL4B Nicotiana tabacum cDNA clone KL4B.111M23, r             | 22.2    | 1 |
| tc Rep: Chromosome chr8 scaffold_88, whole genome shotgun sequence - Vitis vin        | 8258.06 | 1 |
| Unknown                                                                               | 19.43   | 1 |
| gb AGN_RNC211xb13f1.ab1 AGN_RNC Nicotiana tabacum cDNA 5', mRNA sequenc               | 224.94  | 1 |
| Unknown                                                                               | 62.26   | 1 |
| gb KP1B.113A16F.060117T7 KP1B Nicotiana tabacum cDNA clone KP1B.113A16, m             | 251.52  | 1 |
| tc Rep: Water channel protein - Nicotiana excelsior, complete [TC40274]               | 26.16   | 1 |
| tc Rep: Eukaryotic translation initiation factor 5A-1/2 - Solanum tuberosum (Potatc   | 1883.66 | 1 |
| Unknown                                                                               | 22.66   | 1 |
| tc Rep: Ubiquitin fusion-degradation protein-like - Solanum tuberosum (Potato), pa    | 24.97   | 1 |
| Unknown                                                                               | 2950.81 | 1 |
| Unknown                                                                               | 254.46  | 1 |
| Unknown                                                                               | 2638.24 | 1 |
| Unknown                                                                               | 557.39  | 1 |
| Unknown                                                                               | 490.63  | 1 |
| tc Rep: Elongation factor EF-2 - Arabidopsis thaliana (Mouse-ear cress), partial (27% | 273.44  | 1 |
| tc Rep: Chromosome chr13 scaffold_17, whole genome shotgun sequence - Vitis vi        | 2632.13 | 1 |
| tc Rep: ABC transporter - Populus tremula x Populus tremuloides, partial (42%) [TC    | 20.5    | 1 |
| gb KG9B.104F17F.060120T7 KG9B Nicotiana tabacum cDNA clone KG9B.104F17, m             | 34.54   | 1 |
| tc Rep: Glutaredoxin - Solanum lycopersicum (Tomato) (Lycopersicon esculentum),       | 289.3   | 1 |
| tc Rep: Chromosome chr18 scaffold_24, whole genome shotgun sequence - Vitis vi        | 43.39   | 1 |
| gb Nicotiana tabacum SR1 Nt-rab11a mRNA, complete cds [L29271]                        | 744.16  | 1 |
| gb KP1B.103C06F.050725T7 KP1B Nicotiana tabacum cDNA clone KP1B.103C06, ml            | 1570.6  | 1 |
| gb KT7C.105D06F.051219T7 KT7 Nicotiana tabacum cDNA clone KT7C.105D06, mRl            | 89.63   | 1 |
| gb KG9B.107P08F.060120T7 KG9B Nicotiana tabacum cDNA clone KG9B.107P08, m             | 145.94  | 1 |
| tc Rep: Histone H2B-like protein - Solanum tuberosum (Potato), partial (98%) [TC53    | 393.87  | 1 |
| gb AGN_RNC002xm03f1.ab1 AGN_RNC Nicotiana tabacum cDNA 5', mRNA sequen                | 24.82   | 1 |
| Unknown                                                                               | 56.45   | 1 |
| tc Rep: Chromosome chr5 scaffold_64, whole genome shotgun sequence - Vitis vin        | 80.7    | 1 |
| gb AGN_ELP015xh06f1.ab1 AGN_ELP Nicotiana tabacum cDNA 5', mRNA sequence              | 19.08   | 1 |
| tc Rep: Ras-related protein RAB8-4 - Nicotiana tabacum (Common tobacco), compl        | 467.35  | 1 |
| Unknown                                                                               | 20.66   | 1 |

|                                                                                       |          |   |
|---------------------------------------------------------------------------------------|----------|---|
| Unknown                                                                               | 21.64    | 1 |
| gb AGN_PNL231af1_b2.trimmed.seq AGN_PNL Nicotiana tabacum cDNA 5', mRNA               | 22535.75 | 1 |
| Unknown                                                                               | 678.1    | 1 |
| Unknown                                                                               | 379.91   | 1 |
| tc Rep: Chromosome chr19 scaffold_4, whole genome shotgun sequence - Vitis vin        | 2388.94  | 1 |
| Unknown                                                                               | 61.97    | 1 |
| tc Rep: Chromosome chr18 scaffold_61, whole genome shotgun sequence - Vitis vi        | 50.33    | 1 |
| gb TT-08_004 Samsun trichome library Nicotiana tabacum cDNA, mRNA sequence            | 350.05   | 1 |
| gb KR3B.110K10F.051111T7 KR3B Nicotiana tabacum cDNA clone KR3B.110K10, mI            | 85.27    | 1 |
| gb KF8C.110H13F.051216T7 KF8 Nicotiana tabacum cDNA clone KF8C.110H13, mRI            | 26.39    | 1 |
| gb AM779996 seedling library, SL Nicotiana tabacum cDNA clone nt002097061, mF         | 150.9    | 1 |
| gb AGN_RPC017xd20f1.ab1 AGN_RPC Nicotiana tabacum cDNA 5', mRNA sequenc               | 47.74    | 1 |
| tc Rep: NRC1 - Solanum lycopersicum (Tomato) (Lycopersicon esculentum), partial       | 26.51    | 1 |
| Unknown                                                                               | 21.55    | 1 |
| Unknown                                                                               | 505.27   | 1 |
| tc Rep: Chromosome chr10 scaffold_179, whole genome shotgun sequence - Vitis v        | 112.19   | 1 |
| Unknown                                                                               | 23       | 1 |
| gb AM835066 seedling library, SL Nicotiana tabacum cDNA clone nt002084073, mF         | 94.21    | 1 |
| tc Rep: Chromosome chr7 scaffold_31, whole genome shotgun sequence - Vitis vin        | 216.76   | 1 |
| gb KR3B.106M07F.051109T7 KR3B Nicotiana tabacum cDNA clone KR3B.106M07, r             | 500.86   | 1 |
| gb KG9B.102O14F.051126T7 KG9B Nicotiana tabacum cDNA clone KG9B.102O14, r             | 859.35   | 1 |
| gb KG9B.103F12F.051128T7 KG9B Nicotiana tabacum cDNA clone KG9B.103F12, m             | 165.62   | 1 |
| gb KN6B.101L22F.051230T7 KN6B Nicotiana tabacum cDNA clone KN6B.101L22, m             | 740.92   | 1 |
| tc Rep: NADPH-dependent mannose 6-phosphate reductase - Orobanche ramosa (f           | 50.93    | 1 |
| tc Rep: Chromosome chr8 scaffold_34, whole genome shotgun sequence - Vitis vin        | 466.78   | 1 |
| tc Rep: Ozone-responsive stress-related protein-like - Oryza sativa subsp. japonica l | 640.05   | 1 |
| gb KL4B.101L06F.051103T7 KL4B Nicotiana tabacum cDNA clone KL4B.101L06, mRI           | 7793.21  | 1 |
| gb KL4B.101J12F.051103T7 KL4B Nicotiana tabacum cDNA clone KL4B.101J12, mRN           | 386.13   | 1 |
| tc Rep: Chromosome chr4 scaffold_333, whole genome shotgun sequence - Vitis vi        | 28.09    | 1 |
| gb KR3B.101A04F.051107T7 KR3B Nicotiana tabacum cDNA clone KR3B.101A04, m             | 126.24   | 1 |
| gb 12.2A02 Transformed tobacco Lambda Zap II library Nicotiana tabacum cDNA 5'        | 4644.71  | 1 |
| gb TL13.106E17F.060315T7 TL13 Nicotiana tabacum cDNA clone TL13.106E17, mRI           | 605.72   | 1 |
| gb Nicotiana tabacum mRNA for hypothetical protein (mc304 gene) [AJ966361]            | 1758.98  | 1 |
| Unknown                                                                               | 43.83    | 1 |

|                                                                                      |         |   |
|--------------------------------------------------------------------------------------|---------|---|
| Unknown                                                                              | 46.54   | 1 |
| tc Rep: Chromosome chr6 scaffold_3, whole genome shotgun sequence - Vitis vinifera   | 119.87  | 1 |
| Unknown                                                                              | 27.14   | 1 |
| tc Rep: Ubiquitin carrier protein - Solanum tuberosum (Potato), partial (98%) [TC41] | 25.57   | 1 |
| Unknown                                                                              | 95.41   | 1 |
| gb AGN_RNC029xh08f1.ab1 AGN_RNC Nicotiana tabacum cDNA 5', mRNA sequence             | 94.09   | 1 |
| gb TT-08_I07 K326 trichome library Nicotiana tabacum cDNA, mRNA sequence [FGI]       | 63.12   | 1 |
| tc Rep: Low molecular weight heat-shock protein - Nicotiana tabacum (Common tobacco) | 27.36   | 1 |
| Unknown                                                                              | 1124.47 | 1 |
| tc Rep: UDP-N-acetylmuramoyl-tripeptide--D-alanyl-D-alanine ligase - Brucella suis   | 84.99   | 1 |
| gb KF8C.102A04F.051214T7 KF8 Nicotiana tabacum cDNA clone KF8C.102A04, mRNA          | 758.26  | 1 |
| gb N.tabacum mRNA for ras-related GTP-binding protein [X72212]                       | 2232.78 | 1 |
| gb TL13.101P14F.060313T7 TL13 Nicotiana tabacum cDNA clone TL13.101P14, mRNA         | 99.38   | 1 |
| tc Rep: Chromosome chr6 scaffold_3, whole genome shotgun sequence - Vitis vinifera   | 47.77   | 1 |
| gb AM840678 seedling library, SL Nicotiana tabacum cDNA clone nt002181068, mRNA      | 23.09   | 1 |
| Unknown                                                                              | 151.2   | 1 |
| gb AGN_RNC017xd21f1.ab1 AGN_RNC Nicotiana tabacum cDNA 5', mRNA sequence             | 458.29  | 1 |
| gb Nicotiana tabacum cytosolic aconitase (ACO) mRNA, complete cds [AF194945]         | 19.04   | 1 |
| Unknown                                                                              | 284.9   | 1 |
| gb KG9B.106K08F.051129T7 KG9B Nicotiana tabacum cDNA clone KG9B.106K08, mRNA         | 61      | 1 |
| tc Rep: Heat shock protein 70-3 - Nicotiana tabacum (Common tobacco), partial (3'    | 765.14  | 1 |
| gb Nicotiana tabacum mRNA for NAD-dependent isocitrate dehydrogenase, clone p        | 491.87  | 1 |
| gb 30G03 Transformed tobacco Lambda Zap II library Nicotiana tabacum cDNA 5', r      | 844.18  | 1 |
| gb AGN_RNC116xe09f1.ab1 AGN_RNC Nicotiana tabacum cDNA 5', mRNA sequence             | 260.45  | 1 |
| gb CHO_SL025xj11f1.ab1 CHO_SL Nicotiana tabacum cDNA, mRNA sequence [EH62]           | 512.05  | 1 |
| Unknown                                                                              | 36.68   | 1 |
| Unknown                                                                              | 32.38   | 1 |
| gb KL4B.103D12F.051103T7 KL4B Nicotiana tabacum cDNA clone KL4B.103D12, mRNA         | 76.04   | 1 |
| gb BP535201 MAT005 Nicotiana tabacum cDNA clone BY35035, mRNA sequence [E            | 793.94  | 1 |
| tc Rep: HyPRP2 - Gossypium hirsutum (Upland cotton) (Gossypium mexicanum), pa        | 18.75   | 1 |
| gb TT-07_D03 Samsun trichome library Nicotiana tabacum cDNA, mRNA sequence           | 134.43  | 1 |
| Unknown                                                                              | 85.45   | 1 |
| gb KF8B.201H23F.060124T7 KF8 Nicotiana tabacum cDNA clone KF8B.201H23, mRNA          | 20.78   | 1 |
| gb AM818672 DL, diurnal library Nicotiana tabacum cDNA clone nt005209092, mRNA       | 49.49   | 1 |

|                                                                                        |          |   |
|----------------------------------------------------------------------------------------|----------|---|
| tc Rep: Chromosome chr18 scaffold_1, whole genome shotgun sequence - Vitis vin         | 40.04    | 1 |
| gb 3H05 Transformed tobacco Lambda Zap II library Nicotiana tabacum cDNA 5', m         | 89.55    | 1 |
| Unknown                                                                                | 18       | 1 |
| tc Rep: Chromosome chr18 scaffold_1, whole genome shotgun sequence - Vitis vin         | 137.89   | 1 |
| tc Rep: Mitochondrial small heat shock protein - Solanum lycopersicum (Tomato) (l      | 833.07   | 1 |
| tc Rep: Pyruvate kinase - Vitis vinifera (Grape), partial (19%) [TC70531]              | 3312.58  | 1 |
| Unknown                                                                                | 26.42    | 1 |
| gb TOBESTR023C01 TOBEST cDNA library 1 Nicotiana tabacum cDNA 5', mRNA seq             | 370.45   | 1 |
| Unknown                                                                                | 87.22    | 1 |
| Unknown                                                                                | 118.82   | 1 |
| tc Rep: TCTR2 protein - Solanum lycopersicum (Tomato) (Lycopersicon esculentum         | 184.16   | 1 |
| tc Rep: 60S ribosomal protein L35 - Euphorbia esula (Leafy spurge), complete [TC54     | 169.5    | 1 |
| gb TT-20_005 K326 late senescent leaf library Nicotiana tabacum cDNA, mRNA seq         | 522.68   | 1 |
| Unknown                                                                                | 139.79   | 1 |
| Unknown                                                                                | 548.9    | 1 |
| tc Rep: Chromosome undetermined scaffold_533, whole genome shotgun sequenc             | 131.01   | 1 |
| tc Rep: ZTL - Ipomoea nil (Japanese morning glory) (Pharbitis nil), partial (96%) [TC4 | 270.93   | 1 |
| gb TT-11_N02 Samsun trichome library Nicotiana tabacum cDNA, mRNA sequence             | 450.79   | 1 |
| gb KN6B.100O15F.051019T7 KN6B Nicotiana tabacum cDNA clone KN6B.100O15, r              | 80.16    | 1 |
| gb KL4B.106B16F.051125T7 KL4B Nicotiana tabacum cDNA clone KL4B.106B16, mR             | 55.78    | 1 |
| tc Rep: Chromosome undetermined scaffold_363, whole genome shotgun sequenc             | 2253.42  | 1 |
| tc Rep: Uncharacterized protein At1g73350.2 - Arabidopsis thaliana (Mouse-ear cre      | 42.38    | 1 |
| Unknown                                                                                | 44.23    | 1 |
| gb AGN_PNL222df1_e5.trimmed.seq AGN_PNL Nicotiana tabacum cDNA 5', mRNA                | 3099.98  | 1 |
| tc Rep: Chromosome chr5 scaffold_156, whole genome shotgun sequence - Vitis vi         | 24180.15 | 1 |
| Unknown                                                                                | 952.84   | 1 |
| tc Rep: Chromosome chr6 scaffold_3, whole genome shotgun sequence - Vitis vinif        | 58.2     | 1 |
| gb AGN_RNC023xi12f1.ab1 AGN_RNC Nicotiana tabacum cDNA 5', mRNA sequenc                | 25.75    | 1 |
| Unknown                                                                                | 40.27    | 1 |
| gb KF8C.108O20F.051215T7 KF8 Nicotiana tabacum cDNA clone KF8C.108O20, mRl             | 93.43    | 1 |
| Unknown                                                                                | 21.23    | 1 |
| tc Rep: Nt-rab7c protein - Nicotiana tabacum (Common tobacco), partial (97%) [TC       | 160.84   | 1 |
| tc Rep: 26S proteasome regulatory particle non-ATPase subunit5 - Oryza sativa sub      | 743.97   | 1 |
| tc Rep: Tuber-specific protein - Capsicum annuum (Bell pepper), partial (37%) [TC4:    | 46.26    | 1 |

|                                                                                      |         |   |
|--------------------------------------------------------------------------------------|---------|---|
| gb KG9B.102G16F.051126T7 KG9B Nicotiana tabacum cDNA clone KG9B.102G16, n            | 1888.05 | 1 |
| gb TT-07_D06 K326 late senescent leaf library Nicotiana tabacum cDNA, mRNA seq       | 21.85   | 1 |
| gb KL4B.104D09F.051104T7 KL4B Nicotiana tabacum cDNA clone KL4B.104D09, mF           | 85.8    | 1 |
| gb KG9B.003L13F.050720T7 KG9B Nicotiana tabacum cDNA clone KG9B.003L13, m            | 22.93   | 1 |
| Unknown                                                                              | 205.57  | 1 |
| Unknown                                                                              | 233.14  | 1 |
| tc Rep: Ubiquitin carrier protein - Arachis hypogaea (Peanut), partial (11%) [TC668C | 1233.82 | 1 |
| gb KP1B.037J20F.050628T7 KP1B Nicotiana tabacum cDNA clone KP1B.037J20, mR           | 20.98   | 1 |
| Unknown                                                                              | 25.56   | 1 |
| tc Rep: Chromosome chr16 scaffold_189, whole genome shotgun sequence - Vitis \       | 79.45   | 1 |
| tc Rep: PRL1 protein - Arabidopsis thaliana (Mouse-ear cress), partial (83%) [TC587  | 86.25   | 1 |
| Unknown                                                                              | 21.18   | 1 |
| gb KT7C.109C11F.051221T7 KT7 Nicotiana tabacum cDNA clone KT7C.109C11, mR            | 110.32  | 1 |
| gb TT-05_F22 K326 late senescent leaf library Nicotiana tabacum cDNA, mRNA seq       | 128.77  | 1 |
| tc Rep: Chromosome chr11 scaffold_13, whole genome shotgun sequence - Vitis vi       | 21.73   | 1 |
| gb AGN_RNC003xm07f1.ab1 AGN_RNC Nicotiana tabacum cDNA 5', mRNA sequen               | 38.3    | 1 |
| Unknown                                                                              | 18.47   | 1 |
| gb KP1B.102L17F.050722T7 KP1B Nicotiana tabacum cDNA clone KP1B.102L17, mR           | 27.66   | 1 |
| gb AGN_RNC020xf15f1.ab1 AGN_RNC Nicotiana tabacum cDNA 5', mRNA sequenc              | 115.24  | 1 |
| tc Rep: Eukaryotic initiation factor 4A-3 - Nicotiana plumbaginifolia (Leadwort-leav | 1050.38 | 1 |
| tc Rep: Spliceosomal protein - Solanum tuberosum (Potato), partial (35%) [TC5154:    | 235.89  | 1 |
| gb Nicotiana tabacum WREBP-2 mRNA, complete cds [AB017694]                           | 96.68   | 1 |
| tc Rep: Chromosome chr10 scaffold_179, whole genome shotgun sequence - Vitis \       | 563.5   | 1 |
| gb KF8C.101N10F.051214T7 KF8 Nicotiana tabacum cDNA clone KF8C.101N10, mR            | 255.01  | 1 |
| tc Rep: CONSTANS interacting protein 2b - Solanum lycopersicum (Tomato) (Lycop       | 561.24  | 1 |
| tc Rep: Chromosome chr18 scaffold_137, whole genome shotgun sequence - Vitis \       | 208.78  | 1 |
| gb KF8C.106E15F.051215T7 KF8 Nicotiana tabacum cDNA clone KF8C.106E15, mR            | 671.25  | 1 |
| Unknown                                                                              | 25.7    | 1 |
| tc Rep: Ribosomal protein L33 - Castanea sativa (Sweet chestnut), complete [TC531    | 353.29  | 1 |
| gb AGN_ELP025xg20f1.ab1 AGN_ELP Nicotiana tabacum cDNA 5', mRNA sequence             | 58.71   | 1 |
| gb BL12.103D22F.060309T7 BL12 Nicotiana tabacum cDNA clone BL12.103D22, mF           | 524.25  | 1 |
| gb TT-36_A04 Samsun trichome library Nicotiana tabacum cDNA, mRNA sequence           | 82.91   | 1 |
| Unknown                                                                              | 237.78  | 1 |
| gb KG9B.103F19F.051128T7 KG9B Nicotiana tabacum cDNA clone KG9B.103F19, m            | 110.75  | 1 |

|                                                                                          |         |   |
|------------------------------------------------------------------------------------------|---------|---|
| tc Rep: AN14 - Zea mays (Maize), partial (75%) [TC45728]                                 | 708.79  | 1 |
| gb KT7B.100M05F.051010T7 KT7 Nicotiana tabacum cDNA clone KT7B.100M05, m                 | 40.07   | 1 |
| gb KL4B.108B07F.051105T7 KL4B Nicotiana tabacum cDNA clone KL4B.108B07, mR               | 216.21  | 1 |
| Unknown                                                                                  | 781.57  | 1 |
| gb TT-36_N18 Burley21 trichome library Nicotiana tabacum cDNA, mRNA sequence             | 178.16  | 1 |
| Unknown                                                                                  | 3523.23 | 1 |
| gb TT-48_F18 Samsun trichome library Nicotiana tabacum cDNA, mRNA sequence               | 3324.32 | 1 |
| tc Rep: Chromosome chr19 scaffold_4, whole genome shotgun sequence - Vitis vin           | 75.78   | 1 |
| tc Rep: Arm repeat containing protein homolog-like - Oryza sativa subsp. japonica (      | 75.81   | 1 |
| Unknown                                                                                  | 23.59   | 1 |
| gb KP1B.107N10F.050726T7 KP1B Nicotiana tabacum cDNA clone KP1B.107N10, m                | 739.25  | 1 |
| tc Rep: Chromosome chr2 scaffold_132, whole genome shotgun sequence - Vitis vi           | 240.49  | 1 |
| Unknown                                                                                  | 58.03   | 1 |
| gb Nicotiana tabacum mRNA for phosphate translocator [X75088]                            | 768.38  | 1 |
| gb TT-21_P08 tobacco leaf library Nicotiana tabacum cDNA, mRNA sequence [FG63            | 18.05   | 1 |
| Unknown                                                                                  | 2479.59 | 1 |
| Unknown                                                                                  | 4151.93 | 1 |
| Unknown                                                                                  | 63.89   | 1 |
| tc Rep: Chromosome chr12 scaffold_38, whole genome shotgun sequence - Vitis vi           | 545.96  | 1 |
| tc Rep: Chromosome chr2 scaffold_105, whole genome shotgun sequence - Vitis vi           | 30.29   | 1 |
| Unknown                                                                                  | 97.26   | 1 |
| tc Rep: Chloroplast photosystem I reaction center V - Camellia sinensis (Tea), partic    | 49      | 1 |
| tc Rep: Ribosomal protein L11-like - Nicotiana tabacum (Common tobacco), comple          | 94.32   | 1 |
| tc Rep: Thioredoxin - Limonium bicolor, partial (65%) [TC49822]                          | 23.43   | 1 |
| gb KL4B.103H13F.051103T7 KL4B Nicotiana tabacum cDNA clone KL4B.103H13, mF               | 2625.9  | 1 |
| tc Rep: Ribosomal protein S10 containing protein - Tetrahymena thermophila SB21          | 35      | 1 |
| gb KR2B.111L06F.060128T7 KR2B Nicotiana tabacum cDNA clone KR2B.111L06, mF               | 17.96   | 1 |
| Unknown                                                                                  | 158.75  | 1 |
| Unknown                                                                                  | 781.14  | 1 |
| Unknown                                                                                  | 2472.43 | 1 |
| gb TT-31_E17 K326 late senescent leaf library Nicotiana tabacum cDNA, mRNA seq           | 21.74   | 1 |
| tc Rep: Peptidyl-prolyl cis-trans isomerase - Vitis vinifera (Grape), partial (91%) [TC4 | 14167.6 | 1 |
| Unknown                                                                                  | 55.21   | 1 |
| tc Rep: Chromosome chr18 scaffold_61, whole genome shotgun sequence - Vitis vi           | 52.29   | 1 |



|                                                                                      |          |   |
|--------------------------------------------------------------------------------------|----------|---|
| tc Rep: Ripening regulated protein DDTFR19 - Solanum lycopersicum (Tomato) (Lyc      | 114.52   | 1 |
| Unknown                                                                              | 103.82   | 1 |
| tc Rep: Chromosome chr16 scaffold_10, whole genome shotgun sequence - Vitis vi       | 22.72    | 1 |
| gb AGN_RPC022xe13f1.ab1 AGN_RPC Nicotiana tabacum cDNA 5', mRNA sequence             | 8525.87  | 1 |
| Unknown                                                                              | 27.67    | 1 |
| tc Rep: Chromosome chr1 scaffold_5, whole genome shotgun sequence - Vitis vinif      | 3078.9   | 1 |
| tc Rep: Chromosome chr17 scaffold_12, whole genome shotgun sequence - Vitis vi       | 813.08   | 1 |
| gb TOBESTR043D08 TOBEST cDNA library 1 Nicotiana tabacum cDNA 5', mRNA seq           | 37321.95 | 1 |
| tc Rep: Chromosome undetermined scaffold_44, whole genome shotgun sequence           | 23.58    | 1 |
| gb AM817228 seedling library, SL Nicotiana tabacum cDNA clone nt002051027, mF        | 25.35    | 1 |
| gb KP1B.108B21F.050726T7 KP1B Nicotiana tabacum cDNA clone KP1B.108B21, ml           | 101.35   | 1 |
| Unknown                                                                              | 52.15    | 1 |
| gb KN6B.102G12F.051230T7 KN6B Nicotiana tabacum cDNA clone KN6B.102G12, r            | 3094.8   | 1 |
| Unknown                                                                              | 100.8    | 1 |
| Unknown                                                                              | 46.85    | 1 |
| gb Nicotiana tabacum Tobacco mosaic virus helicase domain-binding protein mRN        | 223.7    | 1 |
| Unknown                                                                              | 961.28   | 1 |
| Unknown                                                                              | 22.13    | 1 |
| tc Rep: Chromosome chr6 scaffold_15, whole genome shotgun sequence - Vitis vin       | 53993.5  | 1 |
| tc Rep: SWIb domain-containing protein - Solanum chacoense (Chaco potato), com       | 50.32    | 1 |
| gb KF8B.200J22F.060120T7 KF8 Nicotiana tabacum cDNA clone KF8B.200J22, mRN           | 251.68   | 1 |
| tc Rep: Nuclear transport factor 2 - Arabidopsis thaliana (Mouse-ear cress), partial | 1011.77  | 1 |
| Unknown                                                                              | 239.9    | 1 |
| tc Rep: Chromosome chr6 scaffold_3, whole genome shotgun sequence - Vitis vinif      | 672.43   | 1 |
| gb TT-03_L14 Samsun trichome library Nicotiana tabacum cDNA, mRNA sequence [         | 3955.02  | 1 |
| gb AGN_ELP024xd21f1.ab1 AGN_ELP Nicotiana tabacum cDNA 5', mRNA sequence             | 30.19    | 1 |
| Unknown                                                                              | 1607.83  | 1 |
| Unknown                                                                              | 766.22   | 1 |
| gb KT7C.106G04F.051219T7 KT7 Nicotiana tabacum cDNA clone KT7C.106G04, mR            | 19.08    | 1 |
| gb KN6B.100C14F.051019T7 KN6B Nicotiana tabacum cDNA clone KN6B.100C14, r            | 214.46   | 1 |
| gb KL4B.112O03F.060131T7 KL4B Nicotiana tabacum cDNA clone KL4B.112O03, mF           | 78.24    | 1 |
| tc Rep: Glucose-1-phosphate adenylyltransferase - Nicotiana tabacum (Common to       | 18.1     | 1 |
| tc Rep: Chromosome chr5 scaffold_72, whole genome shotgun sequence - Vitis vin       | 144.09   | 1 |
| Unknown                                                                              | 124.67   | 1 |

|                                                                                       |         |   |
|---------------------------------------------------------------------------------------|---------|---|
| gb AGN_ELP007xg03f1.ab1 AGN_ELP Nicotiana tabacum cDNA 5', mRNA sequence              | 47.74   | 1 |
| Unknown                                                                               | 55.3    | 1 |
| tc Rep: Chromosome chr2 scaffold_187, whole genome shotgun sequence - Vitis vi        | 123.29  | 1 |
| gb Nicotiana tabacum pollen specific actin-depolymerizing factor 1 (ADF1) mRNA, c     | 18226.8 | 1 |
| gb BP530854 MAT005 Nicotiana tabacum cDNA clone BY23117, mRNA sequence [E             | 48.94   | 1 |
| tc Rep: Protein transport protein SEC61 subunit gamma - Oryza sativa subsp. japon     | 1858.3  | 1 |
| tc Rep: Tonoplast intrinsic protein bobTIP26-1 - Brassica oleracea var. botrytis (Cau | 138.04  | 1 |
| Unknown                                                                               | 80.22   | 1 |
| Unknown                                                                               | 44.42   | 1 |
| gb TT-35_B02 K326 early senescent leaf library Nicotiana tabacum cDNA, mRNA se        | 92.74   | 1 |
| gb KT7C.108P21F.051219T7 KT7 Nicotiana tabacum cDNA clone KT7C.108P21, mRN            | 194.7   | 1 |
| gb KT7C.105L12F.051219T7 KT7 Nicotiana tabacum cDNA clone KT7C.105L12, mRN            | 98.24   | 1 |
| gb KL4B.100E12F.050922T7 KL4B Nicotiana tabacum cDNA clone KL4B.100E12, mR            | 29.82   | 1 |
| Unknown                                                                               | 139.94  | 1 |
| gb AGN_RNC004xc19r1.ab1 AGN_RNC Nicotiana tabacum cDNA 3', mRNA sequenc               | 25.67   | 1 |
| Unknown                                                                               | 373.02  | 1 |
| Unknown                                                                               | 140.47  | 1 |
| tc Rep: Chromosome chr7 scaffold_31, whole genome shotgun sequence - Vitis vin        | 49.07   | 1 |
| gb KN6B.109O12F.060106T7 KN6B Nicotiana tabacum cDNA clone KN6B.109O12, r             | 43.24   | 1 |
| tc Rep: Chromosome chr10 scaffold_179, whole genome shotgun sequence - Vitis v        | 9546.57 | 1 |
| tc Rep: Chromosome undetermined scaffold_134, whole genome shotgun sequenc            | 20.08   | 1 |
| gb KP1B.109O15F.050727T7 KP1B Nicotiana tabacum cDNA clone KP1B.109O15, m             | 866.44  | 1 |
| tc Rep: Beta-amylase 1 - Nicotiana langsdorffii x Nicotiana sanderae (Ornamental t    | 44.16   | 1 |
| Unknown                                                                               | 216.7   | 1 |
| tc Rep: Genomic DNA, chromosome 3, P1 clone: MUO10 - Arabidopsis thaliana (Mc         | 29.86   | 1 |
| gb AM818734 COL, cold overnight library Nicotiana tabacum cDNA clone nt006087         | 114.35  | 1 |
| gb KL4B.110N18F.051106T7 KL4B Nicotiana tabacum cDNA clone KL4B.110N18, m             | 29.43   | 1 |
| tc Rep: Septin - Candida albicans (Yeast), partial (3%) [TC45048]                     | 26.57   | 1 |
| Unknown                                                                               | 659.4   | 1 |
| Unknown                                                                               | 179     | 1 |
| tc Rep: Chromosome chr7 scaffold_20, whole genome shotgun sequence - Vitis vin        | 569.86  | 1 |
| Unknown                                                                               | 98.36   | 1 |
| Unknown                                                                               | 195.06  | 1 |
| tc Rep: Chromosome chr14 scaffold_9, whole genome shotgun sequence - Vitis vin        | 444.54  | 1 |

|                                                                                      |          |   |
|--------------------------------------------------------------------------------------|----------|---|
| gb CHO_SL004xm23f1.ab1 CHO_SL Nicotiana tabacum cDNA, mRNA sequence [EH6             | 1655.36  | 1 |
| gb KL4B.111A08F.060128T7 KL4B Nicotiana tabacum cDNA clone KL4B.111A08, mF           | 64.97    | 1 |
| tc Rep: Chromosome undetermined scaffold_139, whole genome shotgun sequenc           | 1415.38  | 1 |
| tc Rep: Chromosome chr3 scaffold_8, whole genome shotgun sequence - Vitis vinif      | 590.58   | 1 |
| gb TT-18_L23 Burley21 trichome library Nicotiana tabacum cDNA, mRNA sequence         | 49.97    | 1 |
| tc Rep: Chromosome chr3 scaffold_199, whole genome shotgun sequence - Vitis vi       | 145.14   | 1 |
| gb KP1B.101E12F.050722T7 KP1B Nicotiana tabacum cDNA clone KP1B.101E12, mF           | 568.51   | 1 |
| tc Rep: LEA1-like protein - Capsicum annuum (Bell pepper), partial (97%) [TC51846]   | 35.57    | 1 |
| Unknown                                                                              | 267.54   | 1 |
| gb KT7B.103H05F.060124T7 KT7 Nicotiana tabacum cDNA clone KT7B.103H05, mR            | 41.07    | 1 |
| gb BP532909 MAT005 Nicotiana tabacum cDNA clone BY28342, mRNA sequence [E            | 95.32    | 1 |
| Unknown                                                                              | 13769    | 1 |
| gb BP132789 MAT001 Nicotiana tabacum cDNA clone BY4987, mRNA sequence [Bf            | 67.75    | 1 |
| gb KN6B.106I24F.060104T7 KN6B Nicotiana tabacum cDNA clone KN6B.106I24, mF           | 92.38    | 1 |
| tc Rep: Predicted protein - Physcomitrella patens subsp. patens, partial (66%) [TC6! | 94.9     | 1 |
| Unknown                                                                              | 236.05   | 1 |
| gb AGN_PNL216af1_h10.trimmed.seq AGN_PNL Nicotiana tabacum cDNA 5', mRN              | 784.9    | 1 |
| tc Rep: Chromosome chr11 scaffold_13, whole genome shotgun sequence - Vitis vi       | 549.12   | 1 |
| Unknown                                                                              | 107.47   | 1 |
| gb BL12.001M03F.060117T7 BL12 Nicotiana tabacum cDNA clone BL12.001M03, m            | 1179.33  | 1 |
| gb KG9B.002B01F.050720T7 KG9B Nicotiana tabacum cDNA clone KG9B.002B01, r            | 645.11   | 1 |
| tc Rep: Chromosome chr6 scaffold_15, whole genome shotgun sequence - Vitis vin       | 38.77    | 1 |
| gb KF8B.100L06F.151010T7 KF8 Nicotiana tabacum cDNA clone KF8B.100L06, mRN           | 86.26    | 1 |
| gb Nicotiana tabacum cDNA-AFLP-fragment BSTC4-41-230, cultivar Bright Yellow 2       | 174.49   | 1 |
| gb KP1B.110A22F.050727T7 KP1B Nicotiana tabacum cDNA clone KP1B.110A22, m            | 137.97   | 1 |
| gb CHO_SL005xa16f1.ab1 CHO_SL Nicotiana tabacum cDNA, mRNA sequence [EH6             | 244.03   | 1 |
| Unknown                                                                              | 319.51   | 1 |
| Unknown                                                                              | 27.82    | 1 |
| gb KT7C.110F08F.051221T7 KT7 Nicotiana tabacum cDNA clone KT7C.110F08, mRN           | 971.45   | 1 |
| Unknown                                                                              | 90.01    | 1 |
| gb KL5B.116A10F.060217T7 KL5B Nicotiana tabacum cDNA clone KL5B.116A10, mF           | 61.52    | 1 |
| Unknown                                                                              | 1617.63  | 1 |
| tc Rep: Chromosome chr14 scaffold_27, whole genome shotgun sequence - Vitis vi       | 19191.05 | 1 |
| gb KG9B.002H24F.050720T7 KG9B Nicotiana tabacum cDNA clone KG9B.002H24, n            | 20.65    | 1 |

|                                                                                    |          |   |
|------------------------------------------------------------------------------------|----------|---|
| Unknown                                                                            | 19.23    | 1 |
| tc Rep: Thioredoxin peroxidase - Nicotiana tabacum (Common tobacco), partial (85   | 25.69    | 1 |
| gb TT-39_L02 K326 late senescent leaf library Nicotiana tabacum cDNA, mRNA seq     | 38.92    | 1 |
| gb Nicotiana tabacum mRNA for carbamoyl phosphate synthase small subunit [AJ3      | 193.42   | 1 |
| Unknown                                                                            | 85.36    | 1 |
| gb BP530687 MAT005 Nicotiana tabacum cDNA clone BY22326, mRNA sequence [E          | 17.62    | 1 |
| gb TT-36_L19 K326 late senescent leaf library Nicotiana tabacum cDNA, mRNA seq     | 48.68    | 1 |
| Unknown                                                                            | 91.09    | 1 |
| Unknown                                                                            | 179.23   | 1 |
| gb AGN_PNL221df1_g3.trimmed.seq AGN_PNL Nicotiana tabacum cDNA 5', mRNA            | 244.45   | 1 |
| gb AGN_RPC008xm20f1.ab1 AGN_RPC Nicotiana tabacum cDNA 5', mRNA sequenc            | 166.83   | 1 |
| Unknown                                                                            | 22.02    | 1 |
| tc Rep: Chromosome chr14 scaffold_21, whole genome shotgun sequence - Vitis vi     | 109.26   | 1 |
| tc Rep: Chromosome chr2 scaffold_132, whole genome shotgun sequence - Vitis vi     | 659.15   | 1 |
| tc Rep: Chromosome chr13 scaffold_210, whole genome shotgun sequence - Vitis v     | 47.4     | 1 |
| gb CHO_SL023xa21f1.ab1 CHO_SL Nicotiana tabacum cDNA, mRNA sequence [EH6           | 56.47    | 1 |
| gb TT-04_L05 Samsun trichome library Nicotiana tabacum cDNA, mRNA sequence [       | 538.98   | 1 |
| Unknown                                                                            | 26.89    | 1 |
| tc Rep: Histone H2B-like protein - Solanum tuberosum (Potato), complete [TC5538:   | 39.47    | 1 |
| gb TL13.101C08F.060313T7 TL13 Nicotiana tabacum cDNA clone TL13.101C08, mRl        | 2829.35  | 1 |
| gb AGN_RNC116xc13f1.ab1 AGN_RNC Nicotiana tabacum cDNA 5', mRNA sequenc            | 17622.1  | 1 |
| Unknown                                                                            | 32593.85 | 1 |
| gb KF8C.101A13F.051214T7 KF8 Nicotiana tabacum cDNA clone KF8C.101A13, mRl         | 4664.06  | 1 |
| Unknown                                                                            | 27.68    | 1 |
| gb KL5B.111K19F.060117T7 KL5B Nicotiana tabacum cDNA clone KL5B.111K19, mR         | 14798.7  | 1 |
| tc Rep: Chromosome undetermined scaffold_52, whole genome shotgun sequence         | 39.06    | 1 |
| tc Rep: Chromosome chr4 scaffold_6, whole genome shotgun sequence - Vitis vinif    | 69.55    | 1 |
| gb AGN_RPC014xi17f1.ab1 AGN_RPC Nicotiana tabacum cDNA 5', mRNA sequence           | 68.1     | 1 |
| tc Rep: Delta-1-pyrroline-5-carboxylate synthetase (P5CS) [Includes: Glutamate 5-k | 2726.93  | 1 |
| Unknown                                                                            | 56.82    | 1 |
| tc Rep: Chromosome undetermined scaffold_89, whole genome shotgun sequence         | 280.25   | 1 |
| gb CHO_SL005xa23f1.ab1 CHO_SL Nicotiana tabacum cDNA, mRNA sequence [EH6           | 580.28   | 1 |
| Unknown                                                                            | 27.24    | 1 |
| gb KL4B.110O11F.051106T7 KL4B Nicotiana tabacum cDNA clone KL4B.110O11, mR         | 25.69    | 1 |

|                                                                                       |          |   |
|---------------------------------------------------------------------------------------|----------|---|
| gb KL4B.101H07F.051103T7 KL4B Nicotiana tabacum cDNA clone KL4B.101H07, mF            | 746.29   | 1 |
| Unknown                                                                               | 135.38   | 1 |
| Unknown                                                                               | 429.64   | 1 |
| Unknown                                                                               | 112.85   | 1 |
| tc Rep: Chromosome chr17 scaffold_16, whole genome shotgun sequence - Vitis vi        | 26.52    | 1 |
| tc Rep: Elongation factor 1-alpha - Nicotiana paniculata, partial (34%) [TC52938]     | 1288.59  | 1 |
| tc Rep: Selenocysteine methyltransferase - Camellia sinensis (Tea), partial (43%) [T  | 80.44    | 1 |
| tc Rep: Chromosome chr13 scaffold_149, whole genome shotgun sequence - Vitis v        | 258.97   | 1 |
| tc Rep: Aspartate aminotransferase - Nicotiana tabacum (Common tobacco), comp         | 995.04   | 1 |
| gb TT-20_O19 K326 early senescent leaf library Nicotiana tabacum cDNA, mRNA se        | 535.3    | 1 |
| gb AGN_PNL204dr1_a9.trimmed.seq AGN_PNL Nicotiana tabacum cDNA 3', mRNA               | 26.79    | 1 |
| gb KF8B.202M15F.060124T7 KF8 Nicotiana tabacum cDNA clone KF8B.202M15, mF             | 37649.5  | 1 |
| gb KP1B.109I09F.050727T7 KP1B Nicotiana tabacum cDNA clone KP1B.109I09, mR            | 266.48   | 1 |
| tc Rep: Light harvesting chlorophyll a/b-binding protein precursor - Nicotiana sylve: | 128.53   | 1 |
| gb AGN_PNL221df1_b7.trimmed.seq AGN_PNL Nicotiana tabacum cDNA 5', mRNA               | 28614.15 | 1 |
| gb KF8C.105B21F.051215T7 KF8 Nicotiana tabacum cDNA clone KF8C.105B21, mR             | 245.62   | 1 |
| tc Rep: Chromosome undetermined scaffold_221, whole genome shotgun sequenc            | 101.23   | 1 |
| gb TT-12_H17 Samsun trichome library Nicotiana tabacum cDNA, mRNA sequence            | 32.76    | 1 |
| gb KG9B.107A02F.060120T7 KG9B Nicotiana tabacum cDNA clone KG9B.107A02, n             | 983.76   | 1 |
| gb KN6B.110L20F.060106T7 KN6B Nicotiana tabacum cDNA clone KN6B.110L20, m             | 47.12    | 1 |
| gb KL5B.116C11F.060217T7 KL5B Nicotiana tabacum cDNA clone KL5B.116C11, mR            | 32.87    | 1 |
| Unknown                                                                               | 81.54    | 1 |
| tc Rep: LeOPT1 - Solanum lycopersicum (Tomato) (Lycopersicon esculentum), parti       | 396.04   | 1 |
| gb KF8C.102A19F.051214T7 KF8 Nicotiana tabacum cDNA clone KF8C.102A19, mR             | 7544.71  | 1 |
| tc Rep: Chromosome chr7 scaffold_42, whole genome shotgun sequence - Vitis vin        | 527.29   | 1 |
| Unknown                                                                               | 1138.96  | 1 |
| Unknown                                                                               | 556.01   | 1 |
| gb TT-07_K11 K326 late senescent leaf library Nicotiana tabacum cDNA, mRNA seq        | 86.33    | 1 |
| gb AGN_RNC121xg07f1.ab1 AGN_RNC Nicotiana tabacum cDNA 5', mRNA sequenc               | 44.78    | 1 |
| tc Rep: Chromosome chr4 scaffold_6, whole genome shotgun sequence - Vitis vinif       | 20.47    | 1 |
| Unknown                                                                               | 81.87    | 1 |
| Unknown                                                                               | 32.79    | 1 |
| Unknown                                                                               | 25.59    | 1 |
| gb KP1B.104P16F.050725T7 KP1B Nicotiana tabacum cDNA clone KP1B.104P16, mF            | 546.02   | 1 |

|                                                                                              |         |   |
|----------------------------------------------------------------------------------------------|---------|---|
| gb TT-41_B11 K326 late senescent leaf library Nicotiana tabacum cDNA, mRNA seq               | 116.54  | 1 |
| gb Nicotiana tabacum chloroplast carbonic anhydrase gene, complete cds [M94135]              | 8349.84 | 1 |
| gb KL4B.113A05F.060131T7 KL4B Nicotiana tabacum cDNA clone KL4B.113A05, mF                   | 229.65  | 1 |
| Unknown                                                                                      | 100.47  | 1 |
| Unknown                                                                                      | 426.54  | 1 |
| Unknown                                                                                      | 262.43  | 1 |
| tc Rep: Acetyl-CoA synthetase - Solanum tuberosum (Potato), partial (58%) [TC5180]           | 2642.49 | 1 |
| gb TT-17_K19 K326 late senescent leaf library Nicotiana tabacum cDNA, mRNA seq               | 82.17   | 1 |
| tc Rep: Methionine synthase - Nicotiana suaveolens, partial (20%) [TC64608]                  | 22767.9 | 1 |
| tc Rep: Chromosome chr6 scaffold_3, whole genome shotgun sequence - Vitis vinifera           | 1487.92 | 1 |
| gb AGN_RNC005xg15f1.ab1 AGN_RNC Nicotiana tabacum cDNA 5', mRNA sequence                     | 43.4    | 1 |
| gb KF8C.103M14F.051214T7 KF8 Nicotiana tabacum cDNA clone KF8C.103M14, mF                    | 113.33  | 1 |
| gb Nicotiana tabacum putative ethylene receptor (NTHK2) mRNA, complete cds [AL051001]        | 182.5   | 1 |
| tc Rep: Chromosome chr11 scaffold_13, whole genome shotgun sequence - Vitis vinifera         | 20.09   | 1 |
| gb KR2B.110I09F.051229T7 KR2B Nicotiana tabacum cDNA clone KR2B.110I09, mR                   | 84.57   | 1 |
| tc Rep: Acetolactate synthase 2, chloroplast precursor - Nicotiana tabacum (Comm)            | 1034.81 | 1 |
| gb KR2B.109J07F.051229T7 KR2B Nicotiana tabacum cDNA clone KR2B.109J07, mR                   | 144.17  | 1 |
| Unknown                                                                                      | 96.24   | 1 |
| tc Rep: Chromosome chr1 scaffold_5, whole genome shotgun sequence - Vitis vinifera           | 21.31   | 1 |
| Unknown                                                                                      | 27.96   | 1 |
| Unknown                                                                                      | 21.14   | 1 |
| tc Rep: MYB transcription factor MYB143 - Glycine max (Soybean), partial (53%) [TC100000]    | 9458.4  | 1 |
| Unknown                                                                                      | 2817.85 | 1 |
| tc Rep: Chromosome chr9 scaffold_7, whole genome shotgun sequence - Vitis vinifera           | 233.12  | 1 |
| Unknown                                                                                      | 4956.01 | 1 |
| tc Rep: Chromosome undetermined scaffold_133, whole genome shotgun sequence - Vitis vinifera | 43.54   | 1 |
| tc Rep: EIN3-binding F-box protein 2 - Solanum lycopersicum (Tomato) (Lycopersicon)          | 1601.56 | 1 |
| tc Rep: LYTB-like protein-like - Solanum tuberosum (Potato), partial (17%) [TC74040]         | 20.35   | 1 |
| tc Rep: Thaliana 60S ribosomal protein L7 - Solanum tuberosum (Potato), complete             | 25.23   | 1 |
| gb CHO_SL025xa09f1.ab1 CHO_SL Nicotiana tabacum cDNA, mRNA sequence [EH648000]               | 360.68  | 1 |
| tc Rep: Common plant regulatory factor 7 - Petroselinum crispum (Parsley) (Petroselinum)     | 1570.86 | 1 |
| Unknown                                                                                      | 422.89  | 1 |
| gb TL13.110G08F.060320T7 TL13 Nicotiana tabacum cDNA clone TL13.110G08, mR                   | 217.39  | 1 |
| tc Rep: Chromosome chr8 scaffold_150, whole genome shotgun sequence - Vitis vinifera         | 61.5    | 1 |

|                                                                                      |         |   |
|--------------------------------------------------------------------------------------|---------|---|
| gb KT7B.100G14F.051010T7 KT7 Nicotiana tabacum cDNA clone KT7B.100G14, mR            | 111.57  | 1 |
| gb AGN_RNC127xf10f1.ab1 AGN_RNC Nicotiana tabacum cDNA 5', mRNA sequenc              | 32.07   | 1 |
| Unknown                                                                              | 141.93  | 1 |
| tc Rep: Pleckstrin homology domain-containing protein 1 - Arabidopsis thaliana (M    | 53.78   | 1 |
| gb KG9B.005A19F.050721T7 KG9B Nicotiana tabacum cDNA clone KG9B.005A19, n            | 121.22  | 1 |
| gb TT-29_N16 tobacco leaf library Nicotiana tabacum cDNA, mRNA sequence [FG6:        | 35.7    | 1 |
| Unknown                                                                              | 521.6   | 1 |
| Unknown                                                                              | 151.27  | 1 |
| gb KR2B.113N20F.060128T7 KR2B Nicotiana tabacum cDNA clone KR2B.113N20, m            | 51.81   | 1 |
| gb N.tabacum mRNA for chloroplast glucose-6-phosphate dehydrogenase [X99405:         | 518.2   | 1 |
| gb Nicotiana tabacum peroxisome biogenesis factor 10 (PEX10) mRNA, complete c        | 35.86   | 1 |
| tc Rep: Predicted protein - Physcomitrella patens subsp. patens, partial (65%) [TC4: | 23.44   | 1 |
| Unknown                                                                              | 74.24   | 1 |
| Unknown                                                                              | 24.99   | 1 |
| gb CHO_SL013xk10f1.ab1 CHO_SL Nicotiana tabacum cDNA, mRNA sequence [EH6:            | 71.46   | 1 |
| tc Rep: Delta-tonoplast intrinsic protein - Gossypium hirsutum (Upland cotton) (Go   | 100.64  | 1 |
| Unknown                                                                              | 80.72   | 1 |
| gb Nicotiana tabacum 14-3-3 isoform f T14-3f mRNA, complete cds [U91727]             | 2678.16 | 1 |
| gb AM808208 seedling library, SL Nicotiana tabacum cDNA clone nt002145096, mF        | 21.37   | 1 |
| tc Rep: Nudix hydrolase 17, mitochondrial precursor - Arabidopsis thaliana (Mouse    | 519.19  | 1 |
| gb TT-28_P10 K326 trichome library Nicotiana tabacum cDNA, mRNA sequence [FG         | 72.76   | 1 |
| tc Rep: Calcineurin B-like interacting protein kinase - Solanum lycopersicum (Tomat  | 109.64  | 1 |
| tc Rep: Chromosome chr18 scaffold_1, whole genome shotgun sequence - Vitis vin       | 24.36   | 1 |
| tc Rep: Pectin methylesterase - Nicotiana tabacum (Common tobacco), partial (34%     | 42.3    | 1 |
| gb KL4B.103H13F.051103T7 KL4B Nicotiana tabacum cDNA clone KL4B.103H13, mF           | 2368.57 | 1 |
| tc Rep: CBS1 - Hyacinthus orientalis (Common hyacinth), partial (93%) [TC50285]      | 38.92   | 1 |
| Unknown                                                                              | 41.25   | 1 |
| gb AGN_RNC023xa09f1.ab1 AGN_RNC Nicotiana tabacum cDNA 5', mRNA sequenc              | 24.39   | 1 |
| tc Rep: Chromosome chr18 scaffold_59, whole genome shotgun sequence - Vitis vi       | 54.45   | 1 |
| tc Rep: Fiber protein Fb2 - Gossypium barbadense (Sea-island cotton) (Egyptian cot   | 542.14  | 1 |
| tc Rep: Ribosomal protein L17 - Branchiostoma belcheri tsingtauense, partial (50%)   | 21.4    | 1 |
| Unknown                                                                              | 112.46  | 1 |
| tc Rep: Chromosome chr2 scaffold_140, whole genome shotgun sequence - Vitis vi       | 6111.62 | 1 |
| tc Rep: Probable histone-arginine methyltransferase CARM1 - Oryza sativa subsp. ii   | 38.99   | 1 |

|                                                                                      |         |   |
|--------------------------------------------------------------------------------------|---------|---|
| Unknown                                                                              | 83.83   | 1 |
| tc Rep: Glycolate oxidase - Cucurbita cv. Kurokawa Amakuri, partial (44%) [TC42274   | 51.84   | 1 |
| gb AGN_RPC006xo06f1.ab1 AGN_RPC Nicotiana tabacum cDNA 5', mRNA sequence             | 1585.01 | 1 |
| gb TT-48_C07 K326 late senescent leaf library Nicotiana tabacum cDNA, mRNA seq       | 54      | 1 |
| Unknown                                                                              | 80.82   | 1 |
| gb ntsm5 embryogenic microspores Nicotiana tabacum cDNA, mRNA sequence [EB           | 121.36  | 1 |
| tc Rep: 40S ribosomal protein S19-like - Solanum tuberosum (Potato), complete [TC    | 487.59  | 1 |
| Unknown                                                                              | 65.04   | 1 |
| tc Rep: Proteasome subunit alpha type - Nicotiana tabacum (Common tobacco), co       | 21.76   | 1 |
| Unknown                                                                              | 37.95   | 1 |
| tc Rep: Histone H4 [Contains: Osteogenic growth peptide (OGP)]. - Rattus norvegicus  | 394.61  | 1 |
| tc Rep: Chromosome chr13 scaffold_45, whole genome shotgun sequence - Vitis vin      | 796.05  | 1 |
| Unknown                                                                              | 400.44  | 1 |
| Unknown                                                                              | 63.77   | 1 |
| gb KN6B.109M07F.060106T7 KN6B Nicotiana tabacum cDNA clone KN6B.109M07,              | 80.11   | 1 |
| Unknown                                                                              | 33.99   | 1 |
| tc Rep: Chromosome chr6 scaffold_15, whole genome shotgun sequence - Vitis vin       | 24.74   | 1 |
| tc Rep: Chromosome chr7 scaffold_42, whole genome shotgun sequence - Vitis vin       | 92.2    | 1 |
| tc Rep: Adenylate kinase family-like protein - Solanum tuberosum (Potato), partial   | 1850.76 | 1 |
| gb TT-08_M12 Samsun trichome library Nicotiana tabacum cDNA, mRNA sequence           | 105.86  | 1 |
| tc Rep: AG-motif binding protein-2 - Nicotiana tabacum (Common tobacco), compl       | 980.33  | 1 |
| gb TT-23_L07 Burley21 trichome library Nicotiana tabacum cDNA, mRNA sequence         | 100.49  | 1 |
| tc Rep: 40S ribosomal protein S16 - Euphorbia esula (Leafy spurge), partial (97%) [T | 1115.35 | 1 |
| Unknown                                                                              | 245.07  | 1 |
| tc GB DQ536198.1 ABK81124.1 spermidine synthase; tSPDS [NP8635107]                   | 4740.66 | 1 |
| Unknown                                                                              | 18.05   | 1 |
| tc Rep: Homolog of Homo sapiens "Histone 1, H2ai - Takifugu rubripes, partial (30%   | 173.8   | 1 |
| Unknown                                                                              | 261.64  | 1 |
| gb KG9B.102L17F.051126T7 KG9B Nicotiana tabacum cDNA clone KG9B.102L17, m            | 293.28  | 1 |
| tc Rep: Chromosome chr3 scaffold_8, whole genome shotgun sequence - Vitis vinif      | 22.68   | 1 |
| Unknown                                                                              | 44.02   | 1 |
| gb AGN_RNC017xi07f1.ab1 AGN_RNC Nicotiana tabacum cDNA 5', mRNA sequence             | 23.7    | 1 |
| tc Rep: ATP-dependent Clp protease ATP-binding subunit clpA homolog CD4B, chlo       | 609.31  | 1 |
| Unknown                                                                              | 57.02   | 1 |



|                                                                                      |         |   |
|--------------------------------------------------------------------------------------|---------|---|
| Unknown                                                                              | 1277.26 | 1 |
| tc Rep: Histone H1 - Solanum lycopersicum (Tomato) (Lycopersicon esculentum), p      | 24.14   | 1 |
| gb CHO_SL015xc14f2.ab1 CHO_SL Nicotiana tabacum cDNA, mRNA sequence [EH6             | 784.67  | 1 |
| tc Rep: Genomic DNA, chromosome 5, BAC clone:F6N7 - Arabidopsis thaliana (Mou        | 570.47  | 1 |
| gb TT-22_O04 K326 early senescent leaf library Nicotiana tabacum cDNA, mRNA se       | 922.08  | 1 |
| gb KR2B.001N02F.050815T7 KR2B Nicotiana tabacum cDNA clone KR2B.001N02, m            | 793.96  | 1 |
| Unknown                                                                              | 27.71   | 1 |
| Unknown                                                                              | 252.53  | 1 |
| tc Rep: DNA-directed RNA polymerase - Glycine max (Soybean), partial (25%) [TC7C     | 25.27   | 1 |
| tc Rep: Chromosome chr2 scaffold_187, whole genome shotgun sequence - Vitis vi       | 593.25  | 1 |
| gb KF8C.103A11F.051214T7 KF8 Nicotiana tabacum cDNA clone KF8C.103A11, mRN           | 149.12  | 1 |
| gb KT7C.106J06F.051219T7 KT7 Nicotiana tabacum cDNA clone KT7C.106J06, mRN           | 507.46  | 1 |
| gb TT-23_L09 K326 late senescent leaf library Nicotiana tabacum cDNA, mRNA seqi      | 67.82   | 1 |
| tc Rep: Chromosome chr19 scaffold_4, whole genome shotgun sequence - Vitis vin       | 29.03   | 1 |
| tc Rep: 26S protease regulatory subunit 6B homolog - Solanum tuberosum (Potato)      | 29.8    | 1 |
| Unknown                                                                              | 249.37  | 1 |
| gb KP1B.110N09F.050727T7 KP1B Nicotiana tabacum cDNA clone KP1B.110N09, m            | 217.06  | 1 |
| Unknown                                                                              | 8929.38 | 1 |
| gb TT-12_E19 Samsun trichome library Nicotiana tabacum cDNA, mRNA sequence           | 79.45   | 1 |
| Unknown                                                                              | 195.2   | 1 |
| gb AM808541 seedling library, SL Nicotiana tabacum cDNA clone nt002203031, mF        | 60.08   | 1 |
| tc Rep: Os09g0554000 protein - Oryza sativa subsp. japonica (Rice), partial (37%) [T | 52.2    | 1 |
| tc Rep: Chromosome chr18 scaffold_1, whole genome shotgun sequence - Vitis vin       | 119.25  | 1 |
| Unknown                                                                              | 707.23  | 1 |
| Unknown                                                                              | 73.86   | 1 |
| Unknown                                                                              | 25.37   | 1 |
| Unknown                                                                              | 52.49   | 1 |
| gb KL4B.104O13F.051104T7 KL4B Nicotiana tabacum cDNA clone KL4B.104O13, mF           | 50.56   | 1 |
| gb KR3B.110O13F.051111T7 KR3B Nicotiana tabacum cDNA clone KR3B.110O13, m            | 185.56  | 1 |
| gb KT7C.110J10F.051221T7 KT7 Nicotiana tabacum cDNA clone KT7C.110J10, mRN           | 129.11  | 1 |
| Unknown                                                                              | 38.48   | 1 |
| gb TT-34_B02 Samsun trichome library Nicotiana tabacum cDNA, mRNA sequence           | 30.26   | 1 |
| Unknown                                                                              | 72.36   | 1 |
| Unknown                                                                              | 506.09  | 1 |

|                                                                                     |         |   |
|-------------------------------------------------------------------------------------|---------|---|
| gb TT-24_N22 Samsun trichome library Nicotiana tabacum cDNA, mRNA sequence          | 387.15  | 1 |
| tc Rep: Protein phosphatase 2C - Nicotiana benthamiana, partial (69%) [TC54430]     | 107.92  | 1 |
| gb FS413263 normalized full-length tobacco cDNA library Nicotiana tabacum cDNA      | 680.95  | 1 |
| tc Rep: 60S ribosomal protein L34 - Nicotiana tabacum (Common tobacco), comple      | 67.24   | 1 |
| gb CHO_SL013xh02f1.ab1 CHO_SL Nicotiana tabacum cDNA, mRNA sequence [EH6            | 23.72   | 1 |
| gb KT7C.102N01F.051216T7 KT7 Nicotiana tabacum cDNA clone KT7C.102N01, mR           | 85.54   | 1 |
| gb Nicotiana tabacum putative red chlorophyll catabolite reductase mRNA, comple     | 21.44   | 1 |
| gb FS438234 normalized full-length tobacco cDNA library Nicotiana tabacum cDNA      | 78.26   | 1 |
| gb KF8C.104F02F.051214T7 KF8 Nicotiana tabacum cDNA clone KF8C.104F02, mRN          | 2950.84 | 1 |
| tc Rep: Cytochrome P450 52 - Aspergillus niger, partial (3%) [TC75821]              | 376.36  | 1 |
| tc Rep: Chromosome chr19 scaffold_4, whole genome shotgun sequence - Vitis vin      | 159.66  | 1 |
| gb Nicotiana tabacum RhoGAP1 mRNA, complete cds [DQ813657]                          | 941.11  | 1 |
| tc Rep: Chromosome chr16 scaffold_86, whole genome shotgun sequence - Vitis vi      | 405.82  | 1 |
| gb KL4B.109D12F.051108T7 KL4B Nicotiana tabacum cDNA clone KL4B.109D12, mF          | 29.25   | 1 |
| Unknown                                                                             | 28.06   | 1 |
| gb CHO_SL010xl06f1.ab1 CHO_SL Nicotiana tabacum cDNA, mRNA sequence [EH61           | 561.35  | 1 |
| gb AGN_PNL220bf1_b1.trimmed.seq AGN_PNL Nicotiana tabacum cDNA 5', mRNA             | 152.72  | 1 |
| Unknown                                                                             | 1571.16 | 1 |
| tc Rep: Dihydrolipoyllysine-residue acetyltransferase component 2 of pyruvate deh   | 5490.39 | 1 |
| gb KG9B.005I12F.050721T7 KG9B Nicotiana tabacum cDNA clone KG9B.005I12, mR          | 292.47  | 1 |
| gb KP1B.103E06F.050725T7 KP1B Nicotiana tabacum cDNA clone KP1B.103E06, mF          | 32.41   | 1 |
| gb CHO_SL020xm13f1.ab1 CHO_SL Nicotiana tabacum cDNA, mRNA sequence [EH6            | 103.18  | 1 |
| gb KN6B.104B07F.060103T7 KN6B Nicotiana tabacum cDNA clone KN6B.104B07, mR          | 1170.23 | 1 |
| gb TT-10_M22 Samsun trichome library Nicotiana tabacum cDNA, mRNA sequence          | 41.93   | 1 |
| tc Rep: Allyl alcohol dehydrogenase - Nicotiana tabacum (Common tobacco), partia    | 150.21  | 1 |
| tc Rep: Chromosome chr19 scaffold_66, whole genome shotgun sequence - Vitis vi      | 476.18  | 1 |
| gb KG9B.105P22F.051128T7 KG9B Nicotiana tabacum cDNA clone KG9B.105P22, m           | 585.48  | 1 |
| Unknown                                                                             | 1036.64 | 1 |
| tc Rep: Ribosomal protein L24-like protein - Solanum tuberosum (Potato), partial (2 | 1229.11 | 1 |
| gb KT7C.110O15F.051221T7 KT7 Nicotiana tabacum cDNA clone KT7C.110O15, mR           | 21.33   | 1 |
| gb TT-21_K15 K326 early senescent leaf library Nicotiana tabacum cDNA, mRNA se      | 24.77   | 1 |
| Unknown                                                                             | 2744.94 | 1 |
| gb AGN_RPC007xg20f1.ab1 AGN_RPC Nicotiana tabacum cDNA 5', mRNA sequence            | 43.07   | 1 |
| gb FS403398 normalized full-length tobacco cDNA library Nicotiana tabacum cDNA      | 101.06  | 1 |

|                                                                                        |         |   |
|----------------------------------------------------------------------------------------|---------|---|
| Unknown                                                                                | 32.8    | 1 |
| tc Rep: 26S proteasome subunit 4-like - Solanum tuberosum (Potato), complete [TC       | 263.37  | 1 |
| gb TT-50_I09 K326 late senescent leaf library Nicotiana tabacum cDNA, mRNA seq         | 150.75  | 1 |
| gb KF8C.103M14F.051214T7 KF8 Nicotiana tabacum cDNA clone KF8C.103M14, mF              | 150.48  | 1 |
| gb CHO_SL027xe15f1.ab1 CHO_SL Nicotiana tabacum cDNA, mRNA sequence [EH6               | 25.69   | 1 |
| gb KP1B.107J17F.050726T7 KP1B Nicotiana tabacum cDNA clone KP1B.107J17, mR             | 136.96  | 1 |
| gb TT-04_B13 Samsun trichome library Nicotiana tabacum cDNA, mRNA sequence             | 25.88   | 1 |
| gb TT-08_C20 Burley21 trichome library Nicotiana tabacum cDNA, mRNA sequence           | 20.04   | 1 |
| Unknown                                                                                | 640.92  | 1 |
| tc AAC32911.1 - Arabidopsis thaliana (Mouse-ear cress), partial (24%) [TC63379]        | 69.41   | 1 |
| Unknown                                                                                | 980.82  | 1 |
| Unknown                                                                                | 24.13   | 1 |
| gb KP1B.107F21F.050726T7 KP1B Nicotiana tabacum cDNA clone KP1B.107F21, mF             | 23.83   | 1 |
| tc Rep: Nucleosome assembly protein 1-like protein 1 - Nicotiana tabacum (Comm         | 51.53   | 1 |
| gb CHO_SL020xa06f1.ab1 CHO_SL Nicotiana tabacum cDNA, mRNA sequence [EH6               | 342.9   | 1 |
| gb KF8C.101H24F.051214T7 KF8 Nicotiana tabacum cDNA clone KF8C.101H24, mR              | 181.45  | 1 |
| gb KP1B.108B21F.050726T7 KP1B Nicotiana tabacum cDNA clone KP1B.108B21, m              | 60.84   | 1 |
| Unknown                                                                                | 26.61   | 1 |
| gb KT7B.107G19F.060124T7 KT7 Nicotiana tabacum cDNA clone KT7B.107G19, mR              | 575.62  | 1 |
| tc Rep: Chromosome chr1 scaffold_75, whole genome shotgun sequence - Vitis vin         | 18127.2 | 1 |
| tc Rep: Endoglucanase-like protein - Saccharophagus degradans (strain 2-40 / ATCC      | 56.14   | 1 |
| gb KL4B.100L09F.050922T7 KL4B Nicotiana tabacum cDNA clone KL4B.100L09, mR             | 107.8   | 1 |
| tc Rep: Vacuolar ATP synthase catalytic subunit A - Daucus carota (Carrot), partial (  | 1153.91 | 1 |
| tc Rep: Chromosome chr4 scaffold_39, whole genome shotgun sequence - Vitis vin         | 3852.26 | 1 |
| Unknown                                                                                | 440.38  | 1 |
| tc Rep: Inositol-1,4,5-triphosphate-5-phosphatase - Solanum lycopersicum (Tomat        | 21.8    | 1 |
| tc Rep: Chromosome chr14 scaffold_9, whole genome shotgun sequence - Vitis vin         | 72.85   | 1 |
| Unknown                                                                                | 7621.34 | 1 |
| gb KL4B.104N10F.051104T7 KL4B Nicotiana tabacum cDNA clone KL4B.104N10, mF             | 561.77  | 1 |
| tc Rep: SKP1-like protein - Nicotiana clevelandii (Wild tobacco), complete [TC50857    | 1206.63 | 1 |
| tc Rep: Chromosome chr18 scaffold_1, whole genome shotgun sequence - Vitis vin         | 453.9   | 1 |
| Unknown                                                                                | 78.25   | 1 |
| tc Rep: Cellulose synthase - Solanum tuberosum (Potato), partial (40%) [TC50352]       | 91.67   | 1 |
| tc Rep: Ubiquitin-like protein SMT3 - Oryza sativa subsp. japonica (Rice), partial (85 | 4055.48 | 1 |

|                                                                                      |          |   |
|--------------------------------------------------------------------------------------|----------|---|
| Unknown                                                                              | 520.68   | 1 |
| gb Nicotiana tabacum EIL5 mRNA, complete cds [AY248907]                              | 55.05    | 1 |
| Unknown                                                                              | 134.96   | 1 |
| gb KN6B.104G15F.060103T7 KN6B Nicotiana tabacum cDNA clone KN6B.104G15, n            | 1128.02  | 1 |
| tc Rep: Targeting protein for Xklp2 containing protein, expressed - Oryza sativa sub | 1102.37  | 1 |
| gb Nicotiana tabacum EIL2 mRNA, complete cds [AY248904]                              | 65.76    | 1 |
| gb KF8C.101C13F.051214T7 KF8 Nicotiana tabacum cDNA clone KF8C.101C13, mRN           | 22.13    | 1 |
| gb KT7C.109A05F.051221T7 KT7 Nicotiana tabacum cDNA clone KT7C.109A05, mRI           | 188.27   | 1 |
| gb AGN_PNL226df1_e5.trimmed.seq AGN_PNL Nicotiana tabacum cDNA 5', mRNA              | 255.46   | 1 |
| tc Rep: Chromosome chr17 scaffold_12, whole genome shotgun sequence - Vitis vi       | 25.65    | 1 |
| gb KL4B.106A05F.051125T7 KL4B Nicotiana tabacum cDNA clone KL4B.106A05, mF           | 41.56    | 1 |
| gb FS408551 normalized full-length tobacco cDNA library Nicotiana tabacum cDNA       | 9621.67  | 1 |
| tc Rep: Fructose-bisphosphate aldolase - Vitis vinifera (Grape), complete [TC54270]  | 85.1     | 1 |
| gb ZA-2 tobacco suppression subtractive hybridization cDNA library Nicotiana taba    | 171.47   | 1 |
| Unknown                                                                              | 2093.86  | 1 |
| gb AGN_ELP008xk23f1.ab1 AGN_ELP Nicotiana tabacum cDNA 5', mRNA sequence             | 21.18    | 1 |
| gb TT-41_B09 Samsun trichome library Nicotiana tabacum cDNA, mRNA sequence           | 79.8     | 1 |
| gb KR3B.110I21F.051111T7 KR3B Nicotiana tabacum cDNA clone KR3B.110I21, mRI          | 28.69    | 1 |
| Unknown                                                                              | 14937.05 | 1 |
| Unknown                                                                              | 426.72   | 1 |
| Unknown                                                                              | 376.32   | 1 |
| tc Rep: Aminoalcoholphosphotransferase - Brassica campestris (Field mustard), par    | 1606.48  | 1 |
| Unknown                                                                              | 2675.4   | 1 |
| tc Rep: Chromosome chr19 scaffold_4, whole genome shotgun sequence - Vitis vin       | 1468.38  | 1 |
| gb KG9B.002N07F.050720T7 KG9B Nicotiana tabacum cDNA clone KG9B.002N07, n            | 4915.45  | 1 |
| Unknown                                                                              | 2445.5   | 1 |
| Unknown                                                                              | 26.13    | 1 |
| Unknown                                                                              | 28.51    | 1 |
| gb KP1B.101K20F.050722T7 KP1B Nicotiana tabacum cDNA clone KP1B.101K20, mI           | 370.26   | 1 |
| gb AM837768 COL, cold overnight library Nicotiana tabacum cDNA clone nt006109        | 24.61    | 1 |
| gb KN6B.104G15F.060103T7 KN6B Nicotiana tabacum cDNA clone KN6B.104G15, n            | 1247.01  | 1 |
| Unknown                                                                              | 75.57    | 1 |
| Unknown                                                                              | 24.82    | 1 |
| tc Rep: Bifunctional dihydrofolate reductase-thymidylate synthase (DHFR-TS) [Inclu   | 68.46    | 1 |

|                                                                                               |         |   |
|-----------------------------------------------------------------------------------------------|---------|---|
| tc Rep: Signal recognition particle 54 kDa protein 2 - Solanum lycopersicum (Tomato)          | 329.8   | 1 |
| tc Rep: Glycosyl hydrolase family-like protein - Salvia miltiorrhiza (Chinese sage), partial  | 23.45   | 1 |
| tc Rep: Chromosome chr1 scaffold_22, whole genome shotgun sequence - Vitis vinifera           | 82.88   | 1 |
| Unknown                                                                                       | 36.06   | 1 |
| gb TT-25_J09 K326 late senescent leaf library Nicotiana tabacum cDNA, mRNA sequence           | 44.31   | 1 |
| tc Rep: Fumarase - Solanum tuberosum (Potato), partial (69%) [TC58517]                        | 1031.11 | 1 |
| gb TT-09_A07 K326 early senescent leaf library Nicotiana tabacum cDNA, mRNA sequence          | 152.73  | 1 |
| Unknown                                                                                       | 40.64   | 1 |
| tc Rep: Serpin-like protein - Citrus paradisi (Grapefruit), partial (86%) [TC43466]           | 21.54   | 1 |
| gb AGN_ELP006xa10f1.ab1 AGN_ELP Nicotiana tabacum cDNA 5', mRNA sequence                      | 77.71   | 1 |
| tc Rep: BTF3 - Nicotiana benthamiana, complete [TC68489]                                      | 34      | 1 |
| tc Rep: Chromosome chr12 scaffold_18, whole genome shotgun sequence - Vitis vinifera          | 121.54  | 1 |
| tc Rep: Possible high light inducible protein - Prochlorococcus marinus (strain MIT 8001)     | 31.13   | 1 |
| Unknown                                                                                       | 658.26  | 1 |
| tc Rep: Chromosome chr1 scaffold_46, whole genome shotgun sequence - Vitis vinifera           | 23.02   | 1 |
| gb KF8C.101M19F.051214T7 KF8 Nicotiana tabacum cDNA clone KF8C.101M19, mRNA sequence          | 415.21  | 1 |
| gb KF8C.101C08F.051214T7 KF8 Nicotiana tabacum cDNA clone KF8C.101C08, mRNA sequence          | 895.07  | 1 |
| gb Nicotiana tabacum partial mRNA for glutamyl tRNA Reductase (hemA gene) [AN010001]          | 1526.08 | 1 |
| tc Rep: Pyruvate kinase - Vitis vinifera (Grape), partial (91%) [TC46839]                     | 25.98   | 1 |
| gb KF8B.202C03F.060124T7 KF8 Nicotiana tabacum cDNA clone KF8B.202C03, mRNA sequence          | 4029.88 | 1 |
| tc Rep: 60S ribosomal protein l2 - Oryza sativa subsp. indica (Rice), partial (36%) [TC68489] | 229.55  | 1 |
| tc Rep: Chromosome undetermined scaffold_734, whole genome shotgun sequence - Vitis vinifera  | 498.55  | 1 |
| tc Rep: 2OG-Fe(II) oxygenase - Medicago truncatula (Barrel medic), partial (8%) [TC68489]     | 60.41   | 1 |
| tc Rep: Chromosome chr14 scaffold_27, whole genome shotgun sequence - Vitis vinifera          | 789.54  | 1 |
| gb KR3B.103H22F.051108T7 KR3B Nicotiana tabacum cDNA clone KR3B.103H22, mRNA sequence         | 331.3   | 1 |
| tc Rep: Chromosome chr6 scaffold_3, whole genome shotgun sequence - Vitis vinifera            | 101.03  | 1 |
| tc Rep: Predicted protein - Physcomitrella patens subsp. patens, partial (43%) [TC68489]      | 520.48  | 1 |
| gb KL4B.105C19F.051104T7 KL4B Nicotiana tabacum cDNA clone KL4B.105C19, mRNA sequence         | 85.97   | 1 |
| gb AGN_RNC021xc12f1.ab1 AGN_RNC Nicotiana tabacum cDNA 5', mRNA sequence                      | 136.37  | 1 |
| Unknown                                                                                       | 795.26  | 1 |
| gb KR3B.111A24F.060119T7 KR3B Nicotiana tabacum cDNA clone KR3B.111A24, mRNA sequence         | 185.44  | 1 |
| Unknown                                                                                       | 2270.29 | 1 |
| tc Rep: Chromosome chr14 scaffold_27, whole genome shotgun sequence - Vitis vinifera          | 1258.73 | 1 |
| gb KG9B.001F17F.050628T7 KG9B Nicotiana tabacum cDNA clone KG9B.001F17, mRNA sequence         | 31.97   | 1 |

|                                                                                                       |         |   |
|-------------------------------------------------------------------------------------------------------|---------|---|
| tc Rep: Thioredoxin H-type 1 - <i>Nicotiana tabacum</i> (Common tobacco), partial (71%)               | 42.25   | 1 |
| gb AGN_RPC013xb19f1.ab1 AGN_RPC <i>Nicotiana tabacum</i> cDNA 5', mRNA sequence                       | 57.66   | 1 |
| Unknown                                                                                               | 87.99   | 1 |
| gb TT-18_F15 K326 early senescent leaf library <i>Nicotiana tabacum</i> cDNA, mRNA sequence           | 81.78   | 1 |
| tc Rep: Chromosome chr5 scaffold_64, whole genome shotgun sequence - <i>Vitis vinifera</i>            | 95.98   | 1 |
| Unknown                                                                                               | 666.95  | 1 |
| Unknown                                                                                               | 438.13  | 1 |
| gb KR2B.104L20F.051227T7 KR2B <i>Nicotiana tabacum</i> cDNA clone KR2B.104L20, mRNA sequence          | 60.13   | 1 |
| tc Rep: Chromosome chr8 scaffold_23, whole genome shotgun sequence - <i>Vitis vinifera</i>            | 197.82  | 1 |
| gb KT7C.108N21F.051219T7 KT7 <i>Nicotiana tabacum</i> cDNA clone KT7C.108N21, mRNA sequence           | 92.33   | 1 |
| tc Rep: Bromodomain-containing RNA-binding protein 1 - <i>Nicotiana benthamiana</i> , mRNA sequence   | 2775.92 | 1 |
| Unknown                                                                                               | 53.53   | 1 |
| tc Rep: Probable phospholipid hydroperoxide glutathione peroxidase - <i>Nicotiana tabacum</i>         | 4668.53 | 1 |
| tc Rep: Chromosome chr19 scaffold_35, whole genome shotgun sequence - <i>Vitis vinifera</i>           | 515.42  | 1 |
| tc Rep: Cytochrome c oxidase family protein-like - <i>Solanum tuberosum</i> (Potato), cDNA sequence   | 250.55  | 1 |
| gb TT-07_O15 Samsun trichome library <i>Nicotiana tabacum</i> cDNA, mRNA sequence                     | 1049.06 | 1 |
| Unknown                                                                                               | 108.49  | 1 |
| tc Rep: Ribulose biphosphate carboxylase small chain, chloroplast precursor - <i>Nicotiana glauca</i> | 261.64  | 1 |
| gb KN6B.101E05F.051230T7 KN6B <i>Nicotiana tabacum</i> cDNA clone KN6B.101E05, mRNA sequence          | 141.75  | 1 |
| tc Rep: Chromosome chr5 scaffold_2, whole genome shotgun sequence - <i>Vitis vinifera</i>             | 18.23   | 1 |
| Unknown                                                                                               | 202.5   | 1 |
| tc Rep: Chromosome chr5 scaffold_2, whole genome shotgun sequence - <i>Vitis vinifera</i>             | 261.51  | 1 |
| Unknown                                                                                               | 107.26  | 1 |
| gb KL4B.108J06F.051105T7 KL4B <i>Nicotiana tabacum</i> cDNA clone KL4B.108J06, mRNA sequence          | 27.06   | 1 |
| gb BP131514 MAT001 <i>Nicotiana tabacum</i> cDNA clone BY3567, mRNA sequence [BFL]                    | 21.11   | 1 |
| gb KT7C.112M02F.051221T7 KT7 <i>Nicotiana tabacum</i> cDNA clone KT7C.112M02, mRNA sequence           | 1089.37 | 1 |
| tc Rep: Shaggy-like kinase - <i>Ricinus communis</i> (Castor bean), partial (40%) [TC5354]            | 497.57  | 1 |
| Unknown                                                                                               | 205.55  | 1 |
| tc Rep: Chromosome chr16 scaffold_10, whole genome shotgun sequence - <i>Vitis vinifera</i>           | 22.81   | 1 |
| tc Rep: Predicted protein - <i>Physcomitrella patens</i> subsp. <i>patens</i> , partial (43%) [TC68]  | 40.16   | 1 |
| gb KN6B.105A01F.060104T7 KN6B <i>Nicotiana tabacum</i> cDNA clone KN6B.105A01, mRNA sequence          | 18.13   | 1 |
| Unknown                                                                                               | 1066.29 | 1 |
| tc Rep: Chromosome chr14 scaffold_27, whole genome shotgun sequence - <i>Vitis vinifera</i>           | 104.88  | 1 |
| gb KF8C.102E09F.051214T7 KF8 <i>Nicotiana tabacum</i> cDNA clone KF8C.102E09, mRNA sequence           | 135.1   | 1 |

|                                                                                    |          |   |
|------------------------------------------------------------------------------------|----------|---|
| gb KL4B.103M04F.051103T7 KL4B Nicotiana tabacum cDNA clone KL4B.103M04, m          | 756.39   | 1 |
| gb KF8B.202M15F.060124T7 KF8 Nicotiana tabacum cDNA clone KF8B.202M15, mF          | 43215.5  | 1 |
| tc Rep: Chromosome chr2 scaffold_140, whole genome shotgun sequence - Vitis vi     | 26.86    | 1 |
| gb KP1B.109K06F.050727T7 KP1B Nicotiana tabacum cDNA clone KP1B.109K06, mF         | 175.42   | 1 |
| Unknown                                                                            | 62.05    | 1 |
| Unknown                                                                            | 46.63    | 1 |
| gb TT-30_J08 K326 late senescent leaf library Nicotiana tabacum cDNA, mRNA sequ    | 770.62   | 1 |
| tc Rep: Phosphate/phosphoenolpyruvate translocator - Nicotiana tabacum (Comm       | 72.47    | 1 |
| gb Nicotiana tabacum cysteine-rich protein mRNA, complete cds [AF213464]           | 10468.15 | 1 |
| gb Nicotiana tabacum NtPOX1 mRNA for peroxidase, complete cds [AB178953]           | 72.83    | 1 |
| tc Rep: 14-3-3-like protein A - Nicotiana tabacum (Common tobacco), partial (59%)  | 59.93    | 1 |
| Unknown                                                                            | 86.29    | 1 |
| gb KF8C.106N01F.051215T7 KF8 Nicotiana tabacum cDNA clone KF8C.106N01, mRI         | 47361.9  | 1 |
| tc Rep: Chromosome chr10 scaffold_81, whole genome shotgun sequence - Vitis vi     | 79.08    | 1 |
| Unknown                                                                            | 29.33    | 1 |
| gb ntsm32 embryogenic microspores Nicotiana tabacum cDNA, mRNA sequence [E         | 17.85    | 1 |
| tc Rep: Chromosome chr1 scaffold_46, whole genome shotgun sequence - Vitis vin     | 20.98    | 1 |
| gb TT-06_G20 Burley21 trichome library Nicotiana tabacum cDNA, mRNA sequence       | 2502.83  | 1 |
| gb KL4B.101J19F.051103T7 KL4B Nicotiana tabacum cDNA clone KL4B.101J19, mRN        | 137.85   | 1 |
| Unknown                                                                            | 199.16   | 1 |
| Unknown                                                                            | 1502.9   | 1 |
| gb CHO_SL022xm01f1.ab1 CHO_SL Nicotiana tabacum cDNA, mRNA sequence [EHf           | 3208.79  | 1 |
| gb KN6B.114I07F.060127T7 KN6B Nicotiana tabacum cDNA clone KN6B.114I07, mF         | 46.71    | 1 |
| gb KF8C.101K10F.051214T7 KF8 Nicotiana tabacum cDNA clone KF8C.101K10, mRN         | 60       | 1 |
| Unknown                                                                            | 18.83    | 1 |
| tc Rep: 40S ribosomal protein S16 - Euphorbia esula (Leafy spurge), complete [TC54 | 272.5    | 1 |
| Unknown                                                                            | 73.28    | 1 |
| gb TT-09_B08 Samsun trichome library Nicotiana tabacum cDNA, mRNA sequence         | 90.8     | 1 |
| gb KG9B.106J02F.051129T7 KG9B Nicotiana tabacum cDNA clone KG9B.106J02, mF         | 518.31   | 1 |
| tc Rep: Chromosome chr1 scaffold_5, whole genome shotgun sequence - Vitis vinif    | 23574.6  | 1 |
| Unknown                                                                            | 19.71    | 1 |
| gb KR2B.108F12F.051229T7 KR2B Nicotiana tabacum cDNA clone KR2B.108F12, mF         | 64.16    | 1 |
| tc Rep: Chromosome chr9 scaffold_65, whole genome shotgun sequence - Vitis vin     | 21.58    | 1 |
| gb KP1B.037O02F.050623T7 KP1B Nicotiana tabacum cDNA clone KP1B.037O02, m          | 43.46    | 1 |

|                                                                                      |         |   |
|--------------------------------------------------------------------------------------|---------|---|
| gb TT-40_P15 Samsun trichome library Nicotiana tabacum cDNA, mRNA sequence           | 238.01  | 1 |
| gb CHO_SL010xl21f1.ab1 CHO_SL Nicotiana tabacum cDNA, mRNA sequence [EH61            | 31.43   | 1 |
| Unknown                                                                              | 184.15  | 1 |
| Unknown                                                                              | 1179.56 | 1 |
| tc Rep: Chromosome chr19 scaffold_66, whole genome shotgun sequence - Vitis vi       | 19.44   | 1 |
| Unknown                                                                              | 28.92   | 1 |
| gb AGN_RNC013xl19f1.ab1 AGN_RNC Nicotiana tabacum cDNA 5', mRNA sequenc              | 23.05   | 1 |
| Unknown                                                                              | 184.54  | 1 |
| Unknown                                                                              | 305.17  | 1 |
| gb KT7B.100E11F.051010T7 KT7 Nicotiana tabacum cDNA clone KT7B.100E11, mRN           | 817.36  | 1 |
| gb Nicotiana tabacum mRNA for bromodomain-containing RNA-binding protein 1 (         | 65.96   | 1 |
| Unknown                                                                              | 41.89   | 1 |
| Unknown                                                                              | 33.58   | 1 |
| gb Nicotiana tabacum mRNA for BY-2 kinesin-like protein 10, complete cds [AB003      | 155.73  | 1 |
| tc Rep: Chromosome chr6 scaffold_28, whole genome shotgun sequence - Vitis vin       | 33.28   | 1 |
| Unknown                                                                              | 77.44   | 1 |
| gb KP1B.037C22F.050623T7 KP1B Nicotiana tabacum cDNA clone KP1B.037C22, mI           | 700.19  | 1 |
| tc Rep: DnaJ-like protein - Solanum lycopersicum (Tomato) (Lycopersicon esculent     | 8640.44 | 1 |
| Unknown                                                                              | 392.21  | 1 |
| tc Rep: Chromosome chr4 scaffold_6, whole genome shotgun sequence - Vitis vinif      | 4004.34 | 1 |
| tc Rep: Chromosome undetermined scaffold_143, whole genome shotgun sequenc           | 23.57   | 1 |
| gb AGN_PNL233br1_b11.trimmed.seq AGN_PNL Nicotiana tabacum cDNA 3', mRN.             | 287.29  | 1 |
| Unknown                                                                              | 1430.65 | 1 |
| gb Nicotiana tabacum SR1 Nt-rab11a mRNA, complete cds [L29271]                       | 525.52  | 1 |
| tc Rep: Expressed protein - Arabidopsis thaliana (Mouse-ear cress), partial (50%) [T | 71.35   | 1 |
| gb KN6B.101A12F.051230T7 KN6B Nicotiana tabacum cDNA clone KN6B.101A12, n            | 55.08   | 1 |
| Unknown                                                                              | 27.87   | 1 |
| gb TT-37_C13 tobacco leaf library Nicotiana tabacum cDNA, mRNA sequence [FG63        | 77.41   | 1 |
| gb AGN_RPC024xn15f1.ab1 AGN_RPC Nicotiana tabacum cDNA 5', mRNA sequenc              | 174.66  | 1 |
| Unknown                                                                              | 749.44  | 1 |
| gb KG9B.001J01F.050628T7 KG9B Nicotiana tabacum cDNA clone KG9B.001J01, mF           | 242.66  | 1 |
| gb AGN_RNC030xg05f1.ab1 AGN_RNC Nicotiana tabacum cDNA 5', mRNA sequenc              | 101.25  | 1 |
| tc Rep: 60S ribosomal protein L10 - Solanum lycopersicum (Tomato) (Lycopersicon      | 937.34  | 1 |
| Unknown                                                                              | 35.67   | 1 |



|                                                                                                    |          |   |
|----------------------------------------------------------------------------------------------------|----------|---|
| gb FS396507 normalized full-length tobacco cDNA library <i>Nicotiana tabacum</i> cDNA              | 280.64   | 1 |
| tc Rep: 6-phosphogluconate dehydrogenase, decarboxylating - <i>Spinacia oleracea</i> (S            | 23.69    | 1 |
| gb  <i>Nicotiana tabacum</i> adenylyl cyclase (Axi 141) mRNA, complete cds [AF026389]              | 108.94   | 1 |
| gb AGN_RNC024xj10f1.ab1 AGN_RNC <i>Nicotiana tabacum</i> cDNA 5', mRNA sequence                    | 215.35   | 1 |
| Unknown                                                                                            | 105.24   | 1 |
| tc Rep: Chromosome chr6 scaffold_3, whole genome shotgun sequence - <i>Vitis vinifera</i>          | 298.1    | 1 |
| Unknown                                                                                            | 30.17    | 1 |
| gb TT-04_J11 Burley21 trichome library <i>Nicotiana tabacum</i> cDNA, mRNA sequence                | 3240.78  | 1 |
| gb KL4B.101K10F.051103T7 KL4B <i>Nicotiana tabacum</i> cDNA clone KL4B.101K10, mRNA                | 103.13   | 1 |
| tc Rep: Pyruvate kinase - <i>Vitis vinifera</i> (Grape), partial (58%) [TC41042]                   | 4518.97  | 1 |
| gb KL5B.103N15F.060207T7 KL5B <i>Nicotiana tabacum</i> cDNA clone KL5B.103N15, mRNA                | 527.1    | 1 |
| tc Rep: Os01g0371800 protein - <i>Oryza sativa</i> subsp. <i>japonica</i> (Rice), partial (17%) [T | 25.16    | 1 |
| gb KF8C.105G12F.051215T7 KF8 <i>Nicotiana tabacum</i> cDNA clone KF8C.105G12, mRNA                 | 16.83    | 1 |
| tc Rep: Chromosome chr13 scaffold_17, whole genome shotgun sequence - <i>Vitis vinifera</i>        | 578.17   | 1 |
| Unknown                                                                                            | 28.89    | 1 |
| Unknown                                                                                            | 20.65    | 1 |
| gb KT7C.108B19F.051219T7 KT7 <i>Nicotiana tabacum</i> cDNA clone KT7C.108B19, mRNA                 | 973.11   | 1 |
| gb KG9B.102H18F.051126T7 KG9B <i>Nicotiana tabacum</i> cDNA clone KG9B.102H18, mRNA                | 2884.87  | 1 |
| Unknown                                                                                            | 117.74   | 1 |
| gb CHO_SL023xb16f1.ab1 CHO_SL <i>Nicotiana tabacum</i> cDNA, mRNA sequence [EH6                    | 46.33    | 1 |
| tc Rep: Chromosome chr2 scaffold_105, whole genome shotgun sequence - <i>Vitis vinifera</i>        | 34.73    | 1 |
| tc Rep: Chromosome chr13 scaffold_17, whole genome shotgun sequence - <i>Vitis vinifera</i>        | 39.24    | 1 |
| gb KL4B.102O16F.051125T7 KL4B <i>Nicotiana tabacum</i> cDNA clone KL4B.102O16, mRNA                | 46.87    | 1 |
| Unknown                                                                                            | 160.36   | 1 |
| tc Rep: Chromosome chr2 scaffold_11, whole genome shotgun sequence - <i>Vitis vinifera</i>         | 231.63   | 1 |
| Unknown                                                                                            | 22.29    | 1 |
| tc Rep: Luminal-binding protein 3 - <i>Nicotiana tabacum</i> (Common tobacco), partial (           | 10537.35 | 1 |
| gb TT-04_N05 Samsun trichome library <i>Nicotiana tabacum</i> cDNA, mRNA sequence                  | 47.62    | 1 |
| gb KP1B.101H12F.050722T7 KP1B <i>Nicotiana tabacum</i> cDNA clone KP1B.101H12, mRNA                | 102.69   | 1 |
| tc Rep: Chromosome chr12 scaffold_18, whole genome shotgun sequence - <i>Vitis vinifera</i>        | 72.02    | 1 |
| gb KF8C.104J24F.051214T7 KF8 <i>Nicotiana tabacum</i> cDNA clone KF8C.104J24, mRNA                 | 25.23    | 1 |
| Unknown                                                                                            | 59       | 1 |
| gb TT-11_C20 K326 trichome library <i>Nicotiana tabacum</i> cDNA, mRNA sequence [FC                | 133.67   | 1 |
| gb KF8B.201P16F.060124T7 KF8 <i>Nicotiana tabacum</i> cDNA clone KF8B.201P16, mRNA                 | 130.07   | 1 |

|                                                                                      |          |   |
|--------------------------------------------------------------------------------------|----------|---|
| tc Rep: Fiber protein Fb15 - Gossypium barbadense (Sea-island cotton) (Egyptian cc   | 442.7    | 1 |
| Unknown                                                                              | 170.06   | 1 |
| Unknown                                                                              | 74.32    | 1 |
| gb AGN_RNC007xa15f1.ab1 AGN_RNC Nicotiana tabacum cDNA 5', mRNA sequenc              | 27.95    | 1 |
| gb Nicotiana tabacum Nict2 mRNA for pollen-specific calcium-binding protein, com     | 3934.52  | 1 |
| Unknown                                                                              | 51.34    | 1 |
| tc Rep: Arogenate dehydrogenase 2, chloroplast precursor - Arabidopsis thaliana (N   | 424.22   | 1 |
| tc Rep: Chromosome chr8 scaffold_34, whole genome shotgun sequence - Vitis vin       | 1505.91  | 1 |
| gb AM787843 seedling library, SL Nicotiana tabacum cDNA clone nt002165074, mF        | 3080.01  | 1 |
| gb CHO_SL002xh18f1.ab1 CHO_SL Nicotiana tabacum cDNA, mRNA sequence [EH6             | 53263.6  | 1 |
| tc Rep: Serine hydroxymethyltransferase, mitochondrial precursor - Solanum tuber     | 3455.25  | 1 |
| Unknown                                                                              | 29.27    | 1 |
| Unknown                                                                              | 21.41    | 1 |
| Unknown                                                                              | 18722.65 | 1 |
| gb KF8C.109C04F.051215T7 KF8 Nicotiana tabacum cDNA clone KF8C.109C04, mRN           | 49289    | 1 |
| gb TL13.109N17F.060320T7 TL13 Nicotiana tabacum cDNA clone TL13.109N17, mR           | 2867.71  | 1 |
| gb CHO_SL008xb09f1.ab1 CHO_SL Nicotiana tabacum cDNA, mRNA sequence [EH6             | 237.47   | 1 |
| gb TT-16_E09 Burley21 trichome library Nicotiana tabacum cDNA, mRNA sequence         | 510.89   | 1 |
| tc Rep: Chromosome chr12 scaffold_93, whole genome shotgun sequence - Vitis vi       | 439.02   | 1 |
| gb Nicotiana tabacum putative UDP-glucose dehydrogenase 1 mRNA, complete cds         | 2830.55  | 1 |
| gb KR3B.112N15F.060119T7 KR3B Nicotiana tabacum cDNA clone KR3B.112N15, m            | 19.35    | 1 |
| tc Rep: Chromosome chr8 scaffold_29, whole genome shotgun sequence - Vitis vin       | 144.85   | 1 |
| gb AGN_RNC105xc17f1.ab1 AGN_RNC Nicotiana tabacum cDNA 5', mRNA sequenc              | 119.77   | 1 |
| gb TL13.110N07F.060320T7 TL13 Nicotiana tabacum cDNA clone TL13.110N07, mR           | 270.5    | 1 |
| tc Rep: Os11g0425600 protein - Oryza sativa subsp. japonica (Rice), partial (69%) [T | 1097.24  | 1 |
| gb KL4B.102O04F.051125T7 KL4B Nicotiana tabacum cDNA clone KL4B.102O04, mF           | 53.62    | 1 |
| tc Rep: Predicted protein - Physcomitrella patens subsp. patens, partial (63%) [TC5: | 380.23   | 1 |
| gb AGN_RNC012xg17f1.ab1 AGN_RNC Nicotiana tabacum cDNA 5', mRNA sequenc              | 20.55    | 1 |
| gb KP1B.107J04F.050726T7 KP1B Nicotiana tabacum cDNA clone KP1B.107J04, mR           | 25.39    | 1 |
| Unknown                                                                              | 81.82    | 1 |
| gb KL4B.108L14F.051105T7 KL4B Nicotiana tabacum cDNA clone KL4B.108L14, mRI          | 185.35   | 1 |
| tc Rep: Chromosome chr15 scaffold_19, whole genome shotgun sequence - Vitis vi       | 2081.1   | 1 |
| tc Rep: Chromosome undetermined scaffold_247, whole genome shotgun sequenc           | 385.88   | 1 |
| tc Rep: Chromosome chr17 scaffold_12, whole genome shotgun sequence - Vitis vi       | 25.39    | 1 |

|                                                                                    |         |   |
|------------------------------------------------------------------------------------|---------|---|
| tc Rep: PFE18 protein - Ananas comosus (Pineapple), partial (46%) [TC53747]        | 263.74  | 1 |
| gb KF8C.103H15F.051214T7 KF8 Nicotiana tabacum cDNA clone KF8C.103H15, mRN         | 55.79   | 1 |
| gb Nicotiana tabacum ntp805 (pntp805) mRNA, complete cds [AY366400]                | 56713.9 | 1 |
| gb TOBESTR027C02 TOBEST cDNA library 1 Nicotiana tabacum cDNA 5', mRNA seq         | 53.7    | 1 |
| tc Rep: Proteasome subunit alpha type - Solanum tuberosum (Potato), partial (98%   | 124.1   | 1 |
| gb KP1B.109D12F.050727T7 KP1B Nicotiana tabacum cDNA clone KP1B.109D12, m          | 103.55  | 1 |
| tc Rep: N-carbamoylputrescine amidase - Solanum tuberosum (Potato), complete [     | 660.67  | 1 |
| Unknown                                                                            | 186.52  | 1 |
| tc Rep: Acetyl-CoA carboxylase - Medicago sativa (Alfalfa), partial (5%) [TC49232] | 62.86   | 1 |
| tc Rep: Chromosome chr7 scaffold_42, whole genome shotgun sequence - Vitis vin     | 534.32  | 1 |
| tc Rep: Chromosome chr7 scaffold_44, whole genome shotgun sequence - Vitis vin     | 24.9    | 1 |
| Unknown                                                                            | 184.94  | 1 |
| gb KF8B.201I21F.060124T7 KF8 Nicotiana tabacum cDNA clone KF8B.201I21, mRN/        | 66      | 1 |
| Unknown                                                                            | 20.78   | 1 |
| gb TT-05_L05 K326 trichome library Nicotiana tabacum cDNA, mRNA sequence [FG       | 118.24  | 1 |
| gb KL4B.105B08F.051104T7 KL4B Nicotiana tabacum cDNA clone KL4B.105B08, mR         | 663.95  | 1 |
| Unknown                                                                            | 455.54  | 1 |
| gb KF8C.102K09F.051214T7 KF8 Nicotiana tabacum cDNA clone KF8C.102K09, mRN         | 514.23  | 1 |
| tc Rep: Chromosome undetermined scaffold_139, whole genome shotgun sequenc         | 135.04  | 1 |
| Unknown                                                                            | 18.15   | 1 |
| tc Rep: ATP synthase subunit O, mitochondrial precursor - Ipomoea batatas (Sweet   | 518.05  | 1 |
| tc Rep: Type III chlorophyll a/b-binding protein - Nicotiana tabacum (Common toba  | 20.43   | 1 |
| gb AGN_RNC115xl03f1.ab1 AGN_RNC Nicotiana tabacum cDNA 5', mRNA sequenc            | 24.67   | 1 |
| gb Nicotiana tabacum acetyl-CoA carboxylase (biotin carboxylase subunit) mRNA, c   | 82.79   | 1 |
| gb KL4B.110B13F.051106T7 KL4B Nicotiana tabacum cDNA clone KL4B.110B13, mR         | 10918.4 | 1 |
| Unknown                                                                            | 57.73   | 1 |
| gb KL4B.105K12F.051104T7 KL4B Nicotiana tabacum cDNA clone KL4B.105K12, mR         | 51.49   | 1 |
| tc Rep: Chromosome chr2 scaffold_176, whole genome shotgun sequence - Vitis vi     | 57.77   | 1 |
| tc Rep: Chromosome chr6 scaffold_3, whole genome shotgun sequence - Vitis vinif    | 761.16  | 1 |
| Unknown                                                                            | 18.9    | 1 |
| gb Nicotiana tabacum S-adenosyl-methionine cycloartenol-C24-methyltransferase      | 781.4   | 1 |
| Unknown                                                                            | 37.38   | 1 |
| tc Rep: Chromosome chr5 scaffold_67, whole genome shotgun sequence - Vitis vin     | 752.27  | 1 |
| gb KL4B.106N22F.051125T7 KL4B Nicotiana tabacum cDNA clone KL4B.106N22, mF         | 538.64  | 1 |

|                                                                                       |         |   |
|---------------------------------------------------------------------------------------|---------|---|
| Unknown                                                                               | 54.29   | 1 |
| tc Rep: UDP-apiose/xylose synthase - Solanum tuberosum (Potato), partial (42%) [T     | 2741.79 | 1 |
| gb Nicotiana tabacum mRNA for proteasome A-type subunit [Y16644]                      | 97.48   | 1 |
| gb Nicotiana tabacum putative chloroplast thiazole biosynthetic protein (Thil) mRN    | 36.96   | 1 |
| gb TT-03_B09 K326 trichome library Nicotiana tabacum cDNA, mRNA sequence [FC          | 140.41  | 1 |
| tc Rep: Chromosome chr18 scaffold_1, whole genome shotgun sequence - Vitis vin        | 9655.86 | 1 |
| Unknown                                                                               | 50756.2 | 1 |
| gb TT-14_G23 Samsun trichome library Nicotiana tabacum cDNA, mRNA sequence            | 2686.33 | 1 |
| gb KR2B.115P20F.051230T7 KR2B Nicotiana tabacum cDNA clone KR2B.115P20, m             | 978.18  | 1 |
| gb KN6B.110B04F.060106T7 KN6B Nicotiana tabacum cDNA clone KN6B.110B04, r             | 45.94   | 1 |
| Unknown                                                                               | 246.93  | 1 |
| gb KF8C.103O23F.051214T7 KF8 Nicotiana tabacum cDNA clone KF8C.103O23, mRl            | 70.47   | 1 |
| gb AGN_RNC025xl24f1.ab1 AGN_RNC Nicotiana tabacum cDNA 5', mRNA sequenc               | 481.08  | 1 |
| tc Rep: Chromosome chr11 scaffold_13, whole genome shotgun sequence - Vitis vi        | 60.37   | 1 |
| Unknown                                                                               | 26.57   | 1 |
| gb Nicotiana tabacum putative high mobility group protein 2-like mRNA, partial sec    | 9218.73 | 1 |
| tc Rep: Predicted protein - Physcomitrella patens subsp. patens, partial (93%) [TC6:  | 781.2   | 1 |
| gb TT-02_I17 Burley21 trichome library Nicotiana tabacum cDNA, mRNA sequence          | 1734.66 | 1 |
| tc Rep: Probable protein VP2 - Torque teno virus (isolate Human/Japan/TRM1/199:       | 49.17   | 1 |
| gb KF8B.100B16F.151010T7 KF8 Nicotiana tabacum cDNA clone KF8B.100B16, mRN            | 23.2    | 1 |
| tc Rep: Chromosome chr18 scaffold_121, whole genome shotgun sequence - Vitis v        | 94.87   | 1 |
| gb TT-02_C03 Burley21 trichome library Nicotiana tabacum cDNA, mRNA sequence          | 62.01   | 1 |
| Unknown                                                                               | 79.47   | 1 |
| Unknown                                                                               | 571.6   | 1 |
| Unknown                                                                               | 49.18   | 1 |
| gb Nicotiana tabacum mRNA for thylakoid-bound ascorbate peroxidase, complete          | 187.83  | 1 |
| gb AGN_ELP004xg14f1.ab1 AGN_ELP Nicotiana tabacum cDNA 5', mRNA sequence              | 100.18  | 1 |
| Unknown                                                                               | 208.69  | 1 |
| gb TT-02_K24 K326 early senescent leaf library Nicotiana tabacum cDNA, mRNA se        | 41.39   | 1 |
| tc Rep: Expressed protein - Oryza sativa subsp. japonica (Rice), partial (21%) [TC705 | 21.26   | 1 |
| gb Nicotiana tabacum glycine-rich protein (ntGRP15) mRNA, partial cds [U74325]        | 47.31   | 1 |
| Unknown                                                                               | 1678.54 | 1 |
| Unknown                                                                               | 1329.37 | 1 |
| Unknown                                                                               | 284.04  | 1 |

|                                                                                       |         |   |
|---------------------------------------------------------------------------------------|---------|---|
| Unknown                                                                               | 25.16   | 1 |
| gb TT-18_J08 Samsun trichome library Nicotiana tabacum cDNA, mRNA sequence [          | 67.87   | 1 |
| gb AGN_RNC008xp03f1.ab1 AGN_RNC Nicotiana tabacum cDNA 5', mRNA sequenc               | 1226.96 | 1 |
| Unknown                                                                               | 393.62  | 1 |
| Unknown                                                                               | 25.31   | 1 |
| tc Rep: Ataxin-2 related protein - Ipomoea nil (Japanese morning glory) (Pharbitis n  | 281.5   | 1 |
| gb KR3B.106C01F.051109T7 KR3B Nicotiana tabacum cDNA clone KR3B.106C01, m             | 493.01  | 1 |
| gb KL5B.001L18F.050901T7 KL5B Nicotiana tabacum cDNA clone KL5B.001L18, mRI           | 31.56   | 1 |
| gb KL5B.106L07F.060215T7 KL5B Nicotiana tabacum cDNA clone KL5B.106L07, mRI           | 188.41  | 1 |
| gb FS413762 normalized full-length tobacco cDNA library Nicotiana tabacum cDNA        | 153.1   | 1 |
| gb TL13.102J20F.060313T7 TL13 Nicotiana tabacum cDNA clone TL13.102J20, mRN           | 109.08  | 1 |
| gb 15B09 Transformed tobacco Lambda Zap II library Nicotiana tabacum cDNA 5', r       | 134.72  | 1 |
| Unknown                                                                               | 1473.43 | 1 |
| Unknown                                                                               | 1155.52 | 1 |
| tc Rep: Aromatic amino acid decarboxylase 2 - Solanum lycopersicum (Tomato) (Ly       | 743.36  | 1 |
| Unknown                                                                               | 18224.5 | 1 |
| gb TT-04_N01 K326 early senescent leaf library Nicotiana tabacum cDNA, mRNA se        | 78.63   | 1 |
| tc Rep: DNA-binding protein - Solanum lycopersicum (Tomato) (Lycopersicon esculi      | 102.85  | 1 |
| Unknown                                                                               | 40.56   | 1 |
| Unknown                                                                               | 42.42   | 1 |
| tc Rep: Chromosome chr12 scaffold_103, whole genome shotgun sequence - Vitis v        | 48.09   | 1 |
| gb ntsm25 embryogenic microspores Nicotiana tabacum cDNA, mRNA sequence [E            | 21.56   | 1 |
| tc Rep: 4-coumarate:CoA ligase-like - Nicotiana sylvestris (Wood tobacco), partial (' | 23.22   | 1 |
| Unknown                                                                               | 1048.65 | 1 |
| gb KT7C.105K09F.051219T7 KT7 Nicotiana tabacum cDNA clone KT7C.105K09, mRN            | 68.25   | 1 |
| gb KL4B.102D11F.051125T7 KL4B Nicotiana tabacum cDNA clone KL4B.102D11, mF            | 16267.9 | 1 |
| gb KN6B.102A21F.051230T7 KN6B Nicotiana tabacum cDNA clone KN6B.102A21, n             | 70.24   | 1 |
| gb Nicotiana tabacum GMPase mRNA for GDP-D-mannose pyrophosphorylase, con             | 183.19  | 1 |
| tc Rep: Chromosome chr17 scaffold_12, whole genome shotgun sequence - Vitis vi        | 524.28  | 1 |
| tc Rep: Chromosome chr19 scaffold_4, whole genome shotgun sequence - Vitis vin        | 16977.9 | 1 |
| Unknown                                                                               | 196.29  | 1 |
| tc Rep: Chromosome chr4 scaffold_6, whole genome shotgun sequence - Vitis vinif       | 222.63  | 1 |
| tc Rep: Ran binding protein-1 - Solanum lycopersicum (Tomato) (Lycopersicon escu      | 18.47   | 1 |
| gb KR2B.001F12F.050815T7 KR2B Nicotiana tabacum cDNA clone KR2B.001F12, mF            | 250.68  | 1 |

|                                                                                   |          |   |
|-----------------------------------------------------------------------------------|----------|---|
| Unknown                                                                           | 38.09    | 1 |
| Unknown                                                                           | 32.45    | 1 |
| gb CHO_SL024xd04f1.ab1 CHO_SL Nicotiana tabacum cDNA, mRNA sequence [EH6          | 89.14    | 1 |
| gb Tobacco (N.tabacum) endochitinase mRNA, partial cds [M15173]                   | 44.87    | 1 |
| Unknown                                                                           | 88.26    | 1 |
| gb KL4B.102A16F.051125T7 KL4B Nicotiana tabacum cDNA clone KL4B.102A16, mF        | 13647.35 | 1 |
| tc Rep: Probable histone H2AXa - Arabidopsis thaliana (Mouse-ear cress), complete | 517.85   | 1 |
| gb AGN_RPC023xj11f1.ab1 AGN_RPC Nicotiana tabacum cDNA 5', mRNA sequence          | 30.8     | 1 |
| gb TT-15_K03 Samsun trichome library Nicotiana tabacum cDNA, mRNA sequence        | 20.52    | 1 |
| gb Nicotiana tabacum clone 7 poly(A)-binding protein (PABP) mRNA, partial cds [AF | 9387.75  | 1 |
| tc Rep: Chromosome chr8 scaffold_29, whole genome shotgun sequence - Vitis vin    | 134.45   | 1 |
| tc Rep: Chromosome chr18 scaffold_137, whole genome shotgun sequence - Vitis v    | 21.22    | 1 |
| gb KT7C.101N20F.051216T7 KT7 Nicotiana tabacum cDNA clone KT7C.101N20, mR         | 2368.74  | 1 |
| Unknown                                                                           | 31.72    | 1 |
| Unknown                                                                           | 40.38    | 1 |
| gb KN6B.114I07F.060127T7 KN6B Nicotiana tabacum cDNA clone KN6B.114I07, mF        | 31.21    | 1 |
| Unknown                                                                           | 53.94    | 1 |
| gb AM798360 COL, cold overnight library Nicotiana tabacum cDNA clone nt006071     | 52.59    | 1 |
| gb BP131165 MAT001 Nicotiana tabacum cDNA clone BY3193, mRNA sequence [BF         | 177.26   | 1 |
| Unknown                                                                           | 27.33    | 1 |
| Unknown                                                                           | 27.61    | 1 |
| gb KT7B.107M01F.060124T7 KT7 Nicotiana tabacum cDNA clone KT7B.107M01, ml         | 21.49    | 1 |
| tc Rep: Chromosome undetermined scaffold_91, whole genome shotgun sequence        | 129.55   | 1 |
| gb N.tabacum mRNA for p45Ntf4 [X83880]                                            | 724.94   | 1 |
| Unknown                                                                           | 31.88    | 1 |
| Unknown                                                                           | 32.6     | 1 |
| gb KL4B.105K07F.051104T7 KL4B Nicotiana tabacum cDNA clone KL4B.105K07, mR        | 533.59   | 1 |
| tc Rep: DnaJ homolog - Salix gilgiana (Willow), partial (41%) [TC58289]           | 495.66   | 1 |
| Unknown                                                                           | 27.6     | 1 |
| Unknown                                                                           | 125.9    | 1 |
| tc Rep: Chromosome chr17 scaffold_12, whole genome shotgun sequence - Vitis vi    | 80.45    | 1 |
| Unknown                                                                           | 73.12    | 1 |
| tc Rep: Histone H2B - Gossypium hirsutum (Upland cotton) (Gossypium mexicanum)    | 2683.96  | 1 |
| gb CHO_SL010xl06f1.ab1 CHO_SL Nicotiana tabacum cDNA, mRNA sequence [EH61         | 301.55   | 1 |

|                                                                                     |          |   |
|-------------------------------------------------------------------------------------|----------|---|
| tc Rep: Ras-related GTP-binding protein - Nicotiana tabacum (Common tobacco), c     | 2997.4   | 1 |
| gb KG9B.002L13F.050720T7 KG9B Nicotiana tabacum cDNA clone KG9B.002L13, m           | 27.3     | 1 |
| gb TT-05_E03 K326 trichome library Nicotiana tabacum cDNA, mRNA sequence [FG        | 39.48    | 1 |
| Unknown                                                                             | 7785.69  | 1 |
| tc Rep: VAP27 - Nicotiana plumbaginifolia (Leadwort-leaved tobacco), partial (46%)  | 222.88   | 1 |
| gb TT-08_A20 Samsun trichome library Nicotiana tabacum cDNA, mRNA sequence          | 85.32    | 1 |
| Unknown                                                                             | 242.49   | 1 |
| gb KT7C.105M17F.051219T7 KT7 Nicotiana tabacum cDNA clone KT7C.105M17, ml           | 245.25   | 1 |
| tc Rep: Chromosome chr16 scaffold_94, whole genome shotgun sequence - Vitis vi      | 54.11    | 1 |
| gb KF8C.104I02F.051214T7 KF8 Nicotiana tabacum cDNA clone KF8C.104I02, mRN/         | 9070.43  | 1 |
| gb KG9B.105C09F.051128T7 KG9B Nicotiana tabacum cDNA clone KG9B.105C09, r           | 256.02   | 1 |
| Unknown                                                                             | 21.1     | 1 |
| Unknown                                                                             | 769.76   | 1 |
| Unknown                                                                             | 32.83    | 1 |
| Unknown                                                                             | 57.4     | 1 |
| Unknown                                                                             | 91.58    | 1 |
| Unknown                                                                             | 2862.02  | 1 |
| tc Rep: Chromosome chr11 scaffold_13, whole genome shotgun sequence - Vitis vi      | 86.74    | 1 |
| tc Rep: Betaine aldehyde dehydrogenase - Panax ginseng (Korean ginseng), partial (  | 406.57   | 1 |
| Unknown                                                                             | 65.74    | 1 |
| tc Rep: S-adenosylmethionine decarboxylase proenzyme (AdoMetDC) (SamDC) [Cc         | 18544.95 | 1 |
| gb AGN_RNC127xb09f1.ab1 AGN_RNC Nicotiana tabacum cDNA 5', mRNA sequenc             | 29.47    | 1 |
| Unknown                                                                             | 694.69   | 1 |
| tc Rep: EBP1 - Solanum tuberosum (Potato), complete [TC47559]                       | 22.91    | 1 |
| Unknown                                                                             | 50.32    | 1 |
| gb KT7C.109M07F.051221T7 KT7 Nicotiana tabacum cDNA clone KT7C.109M07, ml           | 500.05   | 1 |
| tc Rep: Chromosome undetermined scaffold_142, whole genome shotgun sequenc          | 148.47   | 1 |
| tc Rep: Ubiquitin carrier protein - Solanum tuberosum (Potato), complete [TC4631(   | 454.72   | 1 |
| tc Rep: Chromosome chr17 scaffold_12, whole genome shotgun sequence - Vitis vi      | 552.61   | 1 |
| gb KP1B.113N24F.060117T7 KP1B Nicotiana tabacum cDNA clone KP1B.113N24, m           | 915.53   | 1 |
| Unknown                                                                             | 36.48    | 1 |
| tc Rep: 3-hydroxy-3-methylglutaryl coenzyme A reductase - Artemisia annua (Swee     | 1105.79  | 1 |
| Unknown                                                                             | 686.5    | 1 |
| tc Rep: Guanine nucleotide-binding protein subunit beta-like protein - Nicotiana pl | 69.23    | 1 |

|                                                                                      |          |   |
|--------------------------------------------------------------------------------------|----------|---|
| gb AGN_RNC108xa19r1.ab1 AGN_RNC Nicotiana tabacum cDNA 3', mRNA sequenc              | 83.41    | 1 |
| gb KF8B.100G17F.051010T7 KF8 Nicotiana tabacum cDNA clone KF8B.100G17, mRI           | 45140.45 | 1 |
| tc Rep: Chromosome undetermined scaffold_339, whole genome shotgun sequenc           | 23.15    | 1 |
| Unknown                                                                              | 81.44    | 1 |
| gb KP1B.001N14F.050628T7 KP1B Nicotiana tabacum cDNA clone KP1B.001N14, m            | 79.24    | 1 |
| gb KL5B.109B20F.060215T7 KL5B Nicotiana tabacum cDNA clone KL5B.109B20, mR           | 1034.11  | 1 |
| gb TT-04_L12 K326 late senescent leaf library Nicotiana tabacum cDNA, mRNA seqi      | 857.16   | 1 |
| gb KF8C.104N01F.051214T7 KF8 Nicotiana tabacum cDNA clone KF8C.104N01, mRI           | 24.24    | 1 |
| gb KG9B.001L10F.050628T7 KG9B Nicotiana tabacum cDNA clone KG9B.001L10, m            | 88.51    | 1 |
| tc Rep: Heat shock protein 90 - Nicotiana tabacum (Common tobacco), partial (16%     | 233.55   | 1 |
| tc Rep: H+-transporting two-sector ATPase, B/B' subunit - Pelobacter propionicus (:  | 187.41   | 1 |
| gb KL4B.102C04F.051125T7 KL4B Nicotiana tabacum cDNA clone KL4B.102C04, mR           | 85.07    | 1 |
| tc Rep: Pleiotropic drug resistance protein 1 - Nicotiana plumbaginifolia (Leadwort- | 235417   | 1 |
| tc Rep: Chromosome chr14 scaffold_21, whole genome shotgun sequence - Vitis vi       | 27.3     | 1 |
| tc Rep: Chromosome chr2 scaffold_113, whole genome shotgun sequence - Vitis vi       | 19.15    | 1 |
| gb KF8C.110N19F.051216T7 KF8 Nicotiana tabacum cDNA clone KF8C.110N19, mRI           | 189.62   | 1 |
| gb KN6B.100N07F.051019T7 KN6B Nicotiana tabacum cDNA clone KN6B.100N07, r            | 110.25   | 1 |
| tc Rep: Heat shock protein 90 - Nicotiana tabacum (Common tobacco), complete [T      | 314.6    | 1 |
| gb KL4B.102I08F.051125T7 KL4B Nicotiana tabacum cDNA clone KL4B.102I08, mRN          | 37.66    | 1 |
| tc Rep: Ubiquitin-conjugating enzyme E2-17 kDa - Solanum lycopersicum (Tomato)       | 859.73   | 1 |
| gb AGN_PNL221bf1_h2.trimmed.seq AGN_PNL Nicotiana tabacum cDNA 5', mRNA              | 25.78    | 1 |
| tc Rep: NtSar1 protein - Nicotiana tabacum (Common tobacco), complete [TC4081        | 8454.97  | 1 |
| Unknown                                                                              | 37.89    | 1 |
| gb KF8C.101E13F.051214T7 KF8 Nicotiana tabacum cDNA clone KF8C.101E13, mRN           | 32.23    | 1 |
| gb AGN_ELP022xi24f1.ab1 AGN_ELP Nicotiana tabacum cDNA 5', mRNA sequence             | 33.65    | 1 |
| Unknown                                                                              | 920.11   | 1 |
| gb KT7C.101D22F.051216T7 KT7 Nicotiana tabacum cDNA clone KT7C.101D22, mRI           | 23.07    | 1 |
| gb AGN_RNC024xj02f1.ab1 AGN_RNC Nicotiana tabacum cDNA 5', mRNA sequenc              | 27.65    | 1 |
| Unknown                                                                              | 22.26    | 1 |
| tc Rep: Branched-chain amino acid ABC transporter, ATP-binding protein - Roseova     | 3632.49  | 1 |
| Unknown                                                                              | 33.52    | 1 |
| gb EST_FLW001xm03f1.ab1 EST_FLW Nicotiana tabacum cDNA, mRNA sequence [E             | 24.04    | 1 |
| Unknown                                                                              | 1915.83  | 1 |
| gb AGN_RNC022xm16f1.ab1 AGN_RNC Nicotiana tabacum cDNA 5', mRNA sequen               | 136.16   | 1 |



|                                                                                       |         |   |
|---------------------------------------------------------------------------------------|---------|---|
| gb KG9B.001G16F.050628T7 KG9B Nicotiana tabacum cDNA clone KG9B.001G16, n             | 178.56  | 1 |
| Unknown                                                                               | 236.58  | 1 |
| tc Rep: Chromosome chr18 scaffold_1, whole genome shotgun sequence - Vitis vin        | 170.18  | 1 |
| tc Rep: Chromosome chr7 scaffold_44, whole genome shotgun sequence - Vitis vin        | 23.68   | 1 |
| gb Nicotiana tabacum auxin-repressed protein-like protein (Arpl1;1) mRNA, compl       | 774.15  | 1 |
| tc Rep: Chromosome chr18 scaffold_1, whole genome shotgun sequence - Vitis vin        | 36.04   | 1 |
| Unknown                                                                               | 168.36  | 1 |
| gb KF8C.101F11F.051214T7 KF8 Nicotiana tabacum cDNA clone KF8C.101F11, mRN            | 78.94   | 1 |
| gb TL13.110I15F.060320T7 TL13 Nicotiana tabacum cDNA clone TL13.110I15, mRN           | 804.28  | 1 |
| Unknown                                                                               | 1044.75 | 1 |
| tc Rep: Chromosome chr8 scaffold_88, whole genome shotgun sequence - Vitis vin        | 50.11   | 1 |
| gb KT7C.110M21F.051221T7 KT7 Nicotiana tabacum cDNA clone KT7C.110M21, m              | 241.87  | 1 |
| gb KF8C.108C05F.051215T7 KF8 Nicotiana tabacum cDNA clone KF8C.108C05, mRN            | 421.42  | 1 |
| tc Rep: Delta-aminolevulinic acid dehydratase - Vitis vinifera (Grape), partial (48%) | 1008.02 | 1 |
| gb KP1B.037G02F.050623T7 KP1B Nicotiana tabacum cDNA clone KP1B.037G02, m             | 691.37  | 1 |
| Unknown                                                                               | 24.28   | 1 |
| Unknown                                                                               | 468.44  | 1 |
| gb TT-06_P09 Burley21 trichome library Nicotiana tabacum cDNA, mRNA sequence          | 26.65   | 1 |
| tc Rep: Transaldolase - Solanum lycopersicum (Tomato) (Lycopersicon esculentum)       | 133.38  | 1 |
| tc Rep: Chromosome undetermined scaffold_342, whole genome shotgun sequenc            | 847.75  | 1 |
| gb KT7C.108E22F.051219T7 KT7 Nicotiana tabacum cDNA clone KT7C.108E22, mRN            | 43.56   | 1 |
| tc Rep: Tobamovirus multiplication 1 homolog - Solanum lycopersicum (Tomato) (L       | 433.99  | 1 |
| Unknown                                                                               | 1081.68 | 1 |
| gb KR3B.101F21F.051107T7 KR3B Nicotiana tabacum cDNA clone KR3B.101F21, m             | 21.34   | 1 |
| Unknown                                                                               | 159.05  | 1 |
| gb Nicotiana tabacum A22 mRNA for hypothetical protein, complete cds [AB18604         | 108.17  | 1 |
| tc Rep: ChaC-like family protein-like - Solanum tuberosum (Potato), partial (94%) [T  | 1203.7  | 1 |
| Unknown                                                                               | 556.14  | 1 |
| gb CHO_SL022xi01f1.ab1 CHO_SL Nicotiana tabacum cDNA, mRNA sequence [EH61             | 258.94  | 1 |
| gb KL4B.101J19F.051103T7 KL4B Nicotiana tabacum cDNA clone KL4B.101J19, mRN           | 21.91   | 1 |
| tc Rep: Chromosome chr9 scaffold_33, whole genome shotgun sequence - Vitis vin        | 1841.06 | 1 |
| gb KP1B.001H09F.050628T7 KP1B Nicotiana tabacum cDNA clone KP1B.001H09, m             | 2530.31 | 1 |
| gb AGN_ELP026xa20f1.ab1 AGN_ELP Nicotiana tabacum cDNA 5', mRNA sequence              | 819.1   | 1 |
| gb KN6B.009D17F.050901T7 KN6B Nicotiana tabacum cDNA clone KN6B.009D17, n             | 68.76   | 1 |

|                                                                                          |          |   |
|------------------------------------------------------------------------------------------|----------|---|
| Unknown                                                                                  | 1030.93  | 1 |
| gb AGN_ELP026xe19f1.ab1 AGN_ELP Nicotiana tabacum cDNA 5', mRNA sequence                 | 24.86    | 1 |
| tc Rep: Allantoate amidohydrolase - Glycine max (Soybean), partial (60%) [TC40936]       | 203.64   | 1 |
| tc Rep: Chromosome chr17 scaffold_12, whole genome shotgun sequence - Vitis vinifera     | 757.7    | 1 |
| gb TT-17_M23 K326 early senescent leaf library Nicotiana tabacum cDNA, mRNA sequence     | 451.78   | 1 |
| gb KP1B.109E18F.050727T7 KP1B Nicotiana tabacum cDNA clone KP1B.109E18, mRNA sequence    | 575.77   | 1 |
| tc Rep: Chromosome chr3 scaffold_8, whole genome shotgun sequence - Vitis vinifera       | 110.1    | 1 |
| tc Rep: Chromosome undetermined scaffold_69, whole genome shotgun sequence               | 94.52    | 1 |
| tc Rep: Syntaxin-52 - Arabidopsis thaliana (Mouse-ear cress), complete [TC40892]         | 482.81   | 1 |
| gb KL4B.102D07F.051125T7 KL4B Nicotiana tabacum cDNA clone KL4B.102D07, mRNA sequence    | 243.98   | 1 |
| Unknown                                                                                  | 120.2    | 1 |
| Unknown                                                                                  | 47.35    | 1 |
| tc Rep: Avr9/Cf-9 rapidly elicited protein 76 - Nicotiana tabacum (Common tobacco)       | 53.94    | 1 |
| gb CHO_SL022xc24f1.ab1 CHO_SL Nicotiana tabacum cDNA, mRNA sequence [EH66]               | 501.38   | 1 |
| Unknown                                                                                  | 79.8     | 1 |
| tc Rep: Chromosome chr14 scaffold_21, whole genome shotgun sequence - Vitis vinifera     | 31.51    | 1 |
| Unknown                                                                                  | 466.63   | 1 |
| gb KT7C.110B02F.051221T7 KT7 Nicotiana tabacum cDNA clone KT7C.110B02, mRNA sequence     | 21645.6  | 1 |
| tc Rep: Chromosome chr18 scaffold_1, whole genome shotgun sequence - Vitis vinifera      | 203.83   | 1 |
| tc Rep: Chromosome chr17 scaffold_16, whole genome shotgun sequence - Vitis vinifera     | 636.28   | 1 |
| gb KR3B.109K20F.051111T7 KR3B Nicotiana tabacum cDNA clone KR3B.109K20, mRNA sequence    | 39.15    | 1 |
| tc Rep: ChaC-like family protein-like - Solanum tuberosum (Potato), partial (94%) [T10]  | 4006.68  | 1 |
| tc Rep: Chromosome chr7 scaffold_42, whole genome shotgun sequence - Vitis vinifera      | 12596.75 | 1 |
| tc Rep: F14D16.17 - Arabidopsis thaliana (Mouse-ear cress), partial (6%) [TC75073]       | 55.69    | 1 |
| Unknown                                                                                  | 23769.2  | 1 |
| Unknown                                                                                  | 26.69    | 1 |
| gb KN6B.103A01F.060103T7 KN6B Nicotiana tabacum cDNA clone KN6B.103A01, mRNA sequence    | 992.74   | 1 |
| gb KF8C.101L11F.051214T7 KF8 Nicotiana tabacum cDNA clone KF8C.101L11, mRNA sequence     | 64.65    | 1 |
| gb AM790765 seedling library, SL Nicotiana tabacum cDNA clone nt002016048, mRNA sequence | 21.83    | 1 |
| Unknown                                                                                  | 99.91    | 1 |
| tc Rep: Chromosome chr11 scaffold_13, whole genome shotgun sequence - Vitis vinifera     | 132.84   | 1 |
| gb AM793576 seedling library, SL Nicotiana tabacum cDNA clone nt002297024, mRNA sequence | 151.01   | 1 |
| gb AGN_PNL216df1_a7.trimmed.seq AGN_PNL Nicotiana tabacum cDNA 5', mRNA sequence         | 27.24    | 1 |
| Unknown                                                                                  | 18.19    | 1 |

|                                                                                      |         |   |
|--------------------------------------------------------------------------------------|---------|---|
| gb TT-07_J21 Samsun trichome library Nicotiana tabacum cDNA, mRNA sequence [         | 2784.45 | 1 |
| Unknown                                                                              | 102.63  | 1 |
| gb AGN_ELP024xh01f1.ab1 AGN_ELP Nicotiana tabacum cDNA 5', mRNA sequence             | 34.64   | 1 |
| gb Nicotiana tabacum fertilization-independent endosperm protein (FIE) mRNA, co      | 18.17   | 1 |
| tc Rep: Chromosome chr14 scaffold_9, whole genome shotgun sequence - Vitis vin       | 135.66  | 1 |
| Unknown                                                                              | 230.41  | 1 |
| gb FS408169 normalized full-length tobacco cDNA library Nicotiana tabacum cDNA       | 693.74  | 1 |
| gb AGN_RPC020xg11f1.ab1 AGN_RPC Nicotiana tabacum cDNA 5', mRNA sequence             | 496.95  | 1 |
| Unknown                                                                              | 25.2    | 1 |
| gb AGN_PNL221bf1_c2.trimmed.seq AGN_PNL Nicotiana tabacum cDNA 5', mRNA              | 856.55  | 1 |
| tc Rep: CRABS CLAW protein - Quercus glauca, partial (8%) [TC70877]                  | 105.92  | 1 |
| gb KR2B.115K01F.051230T7 KR2B Nicotiana tabacum cDNA clone KR2B.115K01, m            | 52.29   | 1 |
| gb Nicotiana tabacum NtMATE1 mRNA for multi antimicrobial extrusion family pro       | 50.14   | 1 |
| gb AGN_RNC123xj03f1.ab1 AGN_RNC Nicotiana tabacum cDNA 5', mRNA sequence             | 268.4   | 1 |
| gb AM788420 seedling library, SL Nicotiana tabacum cDNA clone nt002001046, mF        | 31.3    | 1 |
| gb KG9B.106G11F.051129T7 KG9B Nicotiana tabacum cDNA clone KG9B.106G11, n            | 177.62  | 1 |
| gb AM802537 COL, cold overnight library Nicotiana tabacum cDNA clone nt006166        | 22.51   | 1 |
| tc Rep: Avr9 elicitor response protein - Nicotiana tabacum (Common tobacco), part    | 547.92  | 1 |
| Unknown                                                                              | 41.6    | 1 |
| gb TT-41_E08 Samsun trichome library Nicotiana tabacum cDNA, mRNA sequence           | 268.72  | 1 |
| tc Rep: Retrotransposon gag protein - Solanum demissum (Wild potato), partial (4%    | 30.15   | 1 |
| Unknown                                                                              | 120.63  | 1 |
| gb KR2B.113H17F.060128T7 KR2B Nicotiana tabacum cDNA clone KR2B.113H17, m            | 563.24  | 1 |
| gb Nicotiana tabacum S-adenosyl-L-methionine synthetase (SAMS) mRNA, complet         | 8388.7  | 1 |
| gb KG9B.002A18F.050720T7 KG9B Nicotiana tabacum cDNA clone KG9B.002A18, n            | 870.39  | 1 |
| gb AGN_RNC021xb24f1.ab1 AGN_RNC Nicotiana tabacum cDNA 5', mRNA sequenc              | 111.2   | 1 |
| Unknown                                                                              | 18.97   | 1 |
| tc Rep: Os03g0702000 protein - Oryza sativa subsp. japonica (Rice), partial (32%) [T | 186.01  | 1 |
| tc GB AJ298071.1 CAC18552.1 cell division cycle protein [Nicotiana tabacum] [NP      | 23.54   | 1 |
| gb KL4B.105N14F.051104T7 KL4B Nicotiana tabacum cDNA clone KL4B.105N14, mF           | 929.25  | 1 |
| gb TT-50_M03 K326 late senescent leaf library Nicotiana tabacum cDNA, mRNA sec       | 377.89  | 1 |
| tc Rep: Chromosome undetermined scaffold_1484, whole genome shotgun sequen           | 3509.98 | 1 |
| gb FS416927 normalized full-length tobacco cDNA library Nicotiana tabacum cDNA       | 1077.29 | 1 |
| Unknown                                                                              | 42.91   | 1 |

|                                                                                      |          |   |
|--------------------------------------------------------------------------------------|----------|---|
| Unknown                                                                              | 569.35   | 1 |
| gb KF8C.104O18F.051214T7 KF8 Nicotiana tabacum cDNA clone KF8C.104O18, mR            | 116.11   | 1 |
| gb CHO_SL023xf22f1.ab1 CHO_SL Nicotiana tabacum cDNA, mRNA sequence [EH6             | 1550.26  | 1 |
| gb CHO_SL013xm10f1.ab1 CHO_SL Nicotiana tabacum cDNA, mRNA sequence [EH6             | 189.41   | 1 |
| Unknown                                                                              | 101.33   | 1 |
| tc Rep: Chromosome chr17 scaffold_12, whole genome shotgun sequence - Vitis vi       | 237.56   | 1 |
| tc Rep: Chromosome chr8 scaffold_34, whole genome shotgun sequence - Vitis vin       | 1883.38  | 1 |
| tc Rep: Tubby-like protein - Cicer arietinum (Chickpea) (Garbanzo), partial (13%) [T | 592.41   | 1 |
| tc Rep: Microtubule bundling polypeptide TMBP200 - Nicotiana tabacum (Commor         | 1295.98  | 1 |
| tc Rep: Chromosome undetermined scaffold_91, whole genome shotgun sequence           | 506.92   | 1 |
| tc Rep: Chromosome chr3 scaffold_199, whole genome shotgun sequence - Vitis vi       | 1220.73  | 1 |
| gb KG9B.106K09F.051129T7 KG9B Nicotiana tabacum cDNA clone KG9B.106K09, m            | 3221.98  | 1 |
| gb BP133832 MAT001 Nicotiana tabacum cDNA clone BY6138, mRNA sequence [Bf            | 178.51   | 1 |
| gb AGN_RNC014xn22f1.ab1 AGN_RNC Nicotiana tabacum cDNA 5', mRNA sequenc              | 100.78   | 1 |
| gb TT-50_C15 K326 late senescent leaf library Nicotiana tabacum cDNA, mRNA seq       | 37.82    | 1 |
| gb TT-19_L02 K326 early senescent leaf library Nicotiana tabacum cDNA, mRNA ser      | 51.68    | 1 |
| tc Rep: Adenylate kinase, chloroplast precursor - Solanum tuberosum (Potato), par    | 1053.13  | 1 |
| gb KT7B.107M01F.060124T7 KT7 Nicotiana tabacum cDNA clone KT7B.107M01, ml            | 20.03    | 1 |
| gb BP527163 MAT001 Nicotiana tabacum cDNA clone BY11938, mRNA sequence [E            | 23.72    | 1 |
| tc Rep: Chromosome chr17 scaffold_16, whole genome shotgun sequence - Vitis vi       | 77.57    | 1 |
| gb KF8C.105G05F.051215T7 KF8 Nicotiana tabacum cDNA clone KF8C.105G05, mR            | 1118.4   | 1 |
| Unknown                                                                              | 10210.05 | 1 |
| gb FS424594 normalized full-length tobacco cDNA library Nicotiana tabacum cDNA       | 23.03    | 1 |
| tc Rep: 60S ribosomal protein L12 - Capsicum annuum (Bell pepper), complete [TC5     | 86.17    | 1 |
| gb KL4B.103F10F.051103T7 KL4B Nicotiana tabacum cDNA clone KL4B.103F10, mR           | 25536.1  | 1 |
| Unknown                                                                              | 239.45   | 1 |
| Unknown                                                                              | 128.72   | 1 |
| gb CHO_SL013xa08f1.ab1 CHO_SL Nicotiana tabacum cDNA, mRNA sequence [EH6             | 251.33   | 1 |
| tc Rep: Chromosome chr4 scaffold_6, whole genome shotgun sequence - Vitis vinif      | 980.26   | 1 |
| Unknown                                                                              | 527.53   | 1 |
| gb AGN_ELP012xd15f1.ab1 AGN_ELP Nicotiana tabacum cDNA 5', mRNA sequence             | 33.08    | 1 |
| gb TT-12_E09 Burley21 trichome library Nicotiana tabacum cDNA, mRNA sequence         | 183.81   | 1 |
| Unknown                                                                              | 104.11   | 1 |
| Unknown                                                                              | 511.98   | 1 |

|                                                                                      |          |   |
|--------------------------------------------------------------------------------------|----------|---|
| gb Nicotiana tabacum cDNA-AFLP-fragment BSTC1-41-230, cultivar Bright Yellow 2       | 122.38   | 1 |
| tc Rep: Chromosome chr7 scaffold_42, whole genome shotgun sequence - Vitis vin       | 839.2    | 1 |
| gb KF8C.110D01F.051216T7 KF8 Nicotiana tabacum cDNA clone KF8C.110D01, mRI           | 19.08    | 1 |
| gb KP1B.101P05F.050722T7 KP1B Nicotiana tabacum cDNA clone KP1B.101P05, mI           | 67.43    | 1 |
| Unknown                                                                              | 4830.97  | 1 |
| tc Rep: Histone H3 - Vitis vinifera (Grape), complete [TC47009]                      | 141.68   | 1 |
| Unknown                                                                              | 18.96    | 1 |
| gb KN6B.110M04F.060106T7 KN6B Nicotiana tabacum cDNA clone KN6B.110M04,              | 92.33    | 1 |
| tc Rep: Chromosome chr5 scaffold_156, whole genome shotgun sequence - Vitis vi       | 415.21   | 1 |
| Unknown                                                                              | 85.87    | 1 |
| gb KG9B.002O20F.050720T7 KG9B Nicotiana tabacum cDNA clone KG9B.002O20, r            | 114.32   | 1 |
| gb Nicotiana tabacum mRNA for hypothetical protein (c18 gene) [AJ966359]             | 167.48   | 1 |
| Unknown                                                                              | 134.83   | 1 |
| Unknown                                                                              | 19.65    | 1 |
| gb KL4B.104A12F.051104T7 KL4B Nicotiana tabacum cDNA clone KL4B.104A12, mF           | 522.52   | 1 |
| gb BP525566 MAT001 Nicotiana tabacum cDNA clone BY10248, mRNA sequence [E            | 28.45    | 1 |
| gb KL4B.102C03F.051125T7 KL4B Nicotiana tabacum cDNA clone KL4B.102C03, mR           | 14130.35 | 1 |
| tc Rep: Homolog of Homo sapiens "Histone 1, H2ai - Takifugu rubripes, partial (30%   | 416.34   | 1 |
| gb KG9B.101F04F.060120T7 KG9B Nicotiana tabacum cDNA clone KG9B.101F04, m            | 422.4    | 1 |
| gb KR2B.111P22F.060128T7 KR2B Nicotiana tabacum cDNA clone KR2B.111P22, mI           | 52.67    | 1 |
| tc Rep: Chromosome chr16 scaffold_94, whole genome shotgun sequence - Vitis vi       | 21.49    | 1 |
| tc Rep: Polyubiquitin - Thlaspi caerulescens (Alpine penny-cress) (Thlaspi calaminar | 316.03   | 1 |
| Unknown                                                                              | 22.8     | 1 |
| gb CHO_SL015xm16f2.ab1 CHO_SL Nicotiana tabacum cDNA, mRNA sequence [EHf             | 2996.93  | 1 |
| gb N.tabacum mRNA for inorganic pyrophosphatase (TVP31 clone) [X83729]               | 412.85   | 1 |
| gb TT-29_O01 tobacco leaf library Nicotiana tabacum cDNA, mRNA sequence [FG6:        | 26.02    | 1 |
| tc Rep: Chromosome chr1 scaffold_180, whole genome shotgun sequence - Vitis vi       | 814.23   | 1 |
| gb KF8B.100P06F.151010T7 KF8 Nicotiana tabacum cDNA clone KF8B.100P06, mRN           | 184.95   | 1 |
| Unknown                                                                              | 48.44    | 1 |
| gb TT-38_F24 Samsun trichome library Nicotiana tabacum cDNA, mRNA sequence           | 48.31    | 1 |
| gb TT-36_L21 K326 early senescent leaf library Nicotiana tabacum cDNA, mRNA ser      | 51.65    | 1 |
| tc Rep: Ras-related protein Rab11A - Nicotiana tabacum (Common tobacco), compl       | 410.39   | 1 |
| tc Rep: GLUTATHIONE-REGULATED POTASSIUM-EFFLUX SYSTEM K+/H+ ANTIPORTE                | 52.95    | 1 |
| Unknown                                                                              | 5667.76  | 1 |

|                                                                                      |         |   |
|--------------------------------------------------------------------------------------|---------|---|
| gb AGN_ELP017xm07f1.ab1 AGN_ELP Nicotiana tabacum cDNA 5', mRNA sequence             | 157.8   | 1 |
| Unknown                                                                              | 20.75   | 1 |
| Unknown                                                                              | 947.68  | 1 |
| tc Rep: Serine acetyltransferase 1 - Nicotiana tabacum (Common tobacco), partial (   | 25.9    | 1 |
| gb TT-05_H21 K326 late senescent leaf library Nicotiana tabacum cDNA, mRNA seq       | 30.57   | 1 |
| gb Nicotiana tabacum mRNA for NAD-malate dehydrogenase [AJ006974]                    | 8958.5  | 1 |
| tc Rep: Chromosome chr4 scaffold_39, whole genome shotgun sequence - Vitis vin       | 2586.71 | 1 |
| tc Rep: Chromosome undetermined scaffold_60, whole genome shotgun sequence           | 142.59  | 1 |
| tc Rep: Syntaxin-like protein - Solanum tuberosum (Potato), partial (38%) [TC46504   | 84.95   | 1 |
| tc Rep: Chromosome chr19 scaffold_4, whole genome shotgun sequence - Vitis vin       | 112.66  | 1 |
| tc Rep: Predicted protein - Physcomitrella patens subsp. patens, partial (35%) [TC5: | 52.01   | 1 |
| gb KF8C.106N19F.051215T7 KF8 Nicotiana tabacum cDNA clone KF8C.106N19, mRI           | 52.69   | 1 |
| tc Rep: Plastid quinol oxidase - Solanum lycopersicum (Tomato) (Lycopersicon escu    | 360.38  | 1 |
| gb Nicotiana tabacum chloroplast NADP-malic enzyme precursor, mRNA, complete         | 997.68  | 1 |
| tc Rep: Pyruvate kinase, cytosolic isozyme - Nicotiana tabacum (Common tobacco),     | 1184.38 | 1 |
| gb KL4B.103E18F.051103T7 KL4B Nicotiana tabacum cDNA clone KL4B.103E18, mR           | 147.15  | 1 |
| Unknown                                                                              | 29.89   | 1 |
| gb KL4B.104A04F.051104T7 KL4B Nicotiana tabacum cDNA clone KL4B.104A04, mF           | 28.29   | 1 |
| tc Rep: Predicted protein - Nematostella vectensis (Starlet sea anemone), partial (1 | 47.48   | 1 |
| gb KG9B.101D19F.060120T7 KG9B Nicotiana tabacum cDNA clone KG9B.101D19, n            | 20.36   | 1 |
| gb Nicotiana tabacum mRNA for mitochondrial 2-oxoglutarate [AJ299250]                | 756.22  | 1 |
| tc Rep: Chromosome undetermined scaffold_91, whole genome shotgun sequence           | 896.45  | 1 |
| gb BP531480 MAT005 Nicotiana tabacum cDNA clone BY24380, mRNA sequence [E            | 442.66  | 1 |
| gb AGN_RNC020xn18f1.ab1 AGN_RNC Nicotiana tabacum cDNA 5', mRNA sequenc              | 21.15   | 1 |
| Unknown                                                                              | 20.04   | 1 |
| Unknown                                                                              | 32.74   | 1 |
| gb KG9B.005D18F.050721T7 KG9B Nicotiana tabacum cDNA clone KG9B.005D18, n            | 3979.66 | 1 |
| Unknown                                                                              | 34.66   | 1 |
| tc Rep: 60s acidic ribosomal protein-like protein - Solanum tuberosum (Potato), pai  | 4489.49 | 1 |
| gb KP1B.107G18F.050726T7 KP1B Nicotiana tabacum cDNA clone KP1B.107G18, m            | 48.62   | 1 |
| tc Rep: Ubiquitin carrier protein - Capsicum annuum (Bell pepper), complete [TC51    | 3697.16 | 1 |
| gb KL4B.102H07F.051125T7 KL4B Nicotiana tabacum cDNA clone KL4B.102H07, mF           | 223.49  | 1 |
| gb AM780931 seedling library, SL Nicotiana tabacum cDNA clone nt002043053, mF        | 25.36   | 1 |
| gb Nicotiana tabacum mRNA for chloroplast FtsZ-like protein (ftsZ gene), clone Ftsz  | 110.85  | 1 |

|                                                                                         |          |   |
|-----------------------------------------------------------------------------------------|----------|---|
| gb KF8C.103J17F.051214T7 KF8 Nicotiana tabacum cDNA clone KF8C.103J17, mRNA             | 121.87   | 1 |
| gb Nicotiana tabacum mRNA for putative zinc transporter (C477 gene) [AM851010]          | 144.69   | 1 |
| Unknown                                                                                 | 226.87   | 1 |
| gb KF8C.102I23F.051214T7 KF8 Nicotiana tabacum cDNA clone KF8C.102I23, mRNA             | 17779.35 | 1 |
| Unknown                                                                                 | 1399.27  | 1 |
| gb KL4B.105O20F.051104T7 KL4B Nicotiana tabacum cDNA clone KL4B.105O20, mRNA            | 130.63   | 1 |
| Unknown                                                                                 | 36.69    | 1 |
| Unknown                                                                                 | 90.97    | 1 |
| tc Rep: Chromosome chr5 scaffold_72, whole genome shotgun sequence - Vitis vinifera     | 167.24   | 1 |
| Unknown                                                                                 | 35.24    | 1 |
| tc Rep: Chromosome chr5 scaffold_64, whole genome shotgun sequence - Vitis vinifera     | 744.54   | 1 |
| gb Nicotiana tabacum guanylate kinase (GK-1) mRNA, complete cds [AF205130]              | 1033.24  | 1 |
| gb tbt_000462 Normalized Nicotiana tabacum cDNA library Nicotiana tabacum cDNA          | 5659.21  | 1 |
| tc Rep: VTC2-like protein - Actinidia chinensis (Kiwi) (Yangtao), partial (56%) [TC423] | 40.78    | 1 |
| gb TT-19_K15 tobacco leaf library Nicotiana tabacum cDNA, mRNA sequence [FG63]          | 1175.75  | 1 |
| gb KF8C.104F18F.051214T7 KF8 Nicotiana tabacum cDNA clone KF8C.104F18, mRNA             | 1964.63  | 1 |
| gb AM789086 COL, cold overnight library Nicotiana tabacum cDNA clone nt006143           | 20.67    | 1 |
| gb TT-01_D04 Samsun trichome library Nicotiana tabacum cDNA, mRNA sequence              | 827.33   | 1 |
| Unknown                                                                                 | 371.63   | 1 |
| Unknown                                                                                 | 787.1    | 1 |
| gb TT-39_I22 K326 late senescent leaf library Nicotiana tabacum cDNA, mRNA sequence     | 261.67   | 1 |
| tc Rep: Transcription factor JERF1 - Solanum lycopersicum (Tomato) (Lycopersicon        | 79.84    | 1 |
| Unknown                                                                                 | 30.98    | 1 |
| tc Rep: Chromosome undetermined scaffold_53, whole genome shotgun sequence              | 735.61   | 1 |
| gb AM801892 COL, cold overnight library Nicotiana tabacum cDNA clone nt006056           | 28.75    | 1 |
| gb KP1B.037O12F.050623T7 KP1B Nicotiana tabacum cDNA clone KP1B.037O12, mRNA            | 79.67    | 1 |
| tc Rep: Capsid protein - Olive latent virus 1, partial (5%) [TC57852]                   | 188.64   | 1 |
| gb KR3B.113B04F.060119T7 KR3B Nicotiana tabacum cDNA clone KR3B.113B04, mRNA            | 975.91   | 1 |
| Unknown                                                                                 | 190.82   | 1 |
| gb Nicotiana tabacum peroxisomal acetoacetyl-coenzyme A thiolase (AACT2) mRNA           | 178.61   | 1 |
| gb KP1B.110E09F.050727T7 KP1B Nicotiana tabacum cDNA clone KP1B.110E09, mRNA            | 33.02    | 1 |
| gb KG9B.004N13F.050721T7 KG9B Nicotiana tabacum cDNA clone KG9B.004N13, mRNA            | 55.27    | 1 |
| gb KT7B.107H09F.060124T7 KT7 Nicotiana tabacum cDNA clone KT7B.107H09, mRNA             | 269.8    | 1 |
| tc Rep: Ovule receptor-like kinase 28 precursor - Solanum chacoense (Chaco potato)      | 89.25    | 1 |

|                                                                                     |          |   |
|-------------------------------------------------------------------------------------|----------|---|
| tc Rep: Chromosome undetermined scaffold_2685, whole genome shotgun sequen          | 179.24   | 1 |
| tc Rep: Mature anther-specific protein LAT61 - Solanum lycopersicum (Tomato) (Ly    | 22.54    | 1 |
| gb KF8C.102B01F.051214T7 KF8 Nicotiana tabacum cDNA clone KF8C.102B01, mRN          | 128.1    | 1 |
| tc Rep: Chromosome chr4 scaffold_443, whole genome shotgun sequence - Vitis vi      | 507.74   | 1 |
| Unknown                                                                             | 767.9    | 1 |
| tc Rep: Uncharacterized protein At5g46250.3 - Arabidopsis thaliana (Mouse-ear cre   | 578.06   | 1 |
| gb AGN_RNC024xj15r1.ab1 AGN_RNC Nicotiana tabacum cDNA 3', mRNA sequenc             | 89.92    | 1 |
| tc Rep: Chromosome chr10 scaffold_76, whole genome shotgun sequence - Vitis vi      | 1823.06  | 1 |
| gb N.tabacum npp2 mRNA for protein phosphatase type 1 [Z93769]                      | 1544.15  | 1 |
| gb TT-11_F18 K326 early senescent leaf library Nicotiana tabacum cDNA, mRNA ser     | 80.38    | 1 |
| tc Rep: Chromosome chr6 scaffold_3, whole genome shotgun sequence - Vitis vinif     | 28.78    | 1 |
| gb KL4B.103B21F.051103T7 KL4B Nicotiana tabacum cDNA clone KL4B.103B21, mR          | 2897.23  | 1 |
| gb KG9B.001L18F.050628T7 KG9B Nicotiana tabacum cDNA clone KG9B.001L18, m           | 114.61   | 1 |
| tc Rep: Chromosome chr8 scaffold_23, whole genome shotgun sequence - Vitis vin      | 24.46    | 1 |
| gb Nicotiana tabacum mRNA for hypothetical protein (mc307 gene) [AJ966362]          | 850.28   | 1 |
| Unknown                                                                             | 17.97    | 1 |
| gb KT7C.106A21F.051219T7 KT7 Nicotiana tabacum cDNA clone KT7C.106A21, mRI          | 31.12    | 1 |
| gb KF8C.102D11F.051214T7 KF8 Nicotiana tabacum cDNA clone KF8C.102D11, mRI          | 134.71   | 1 |
| tc Rep: Beta-amylase 1 - Nicotiana langsdorffii x Nicotiana sanderae (Ornamental ti | 73.22    | 1 |
| Unknown                                                                             | 98.69    | 1 |
| Unknown                                                                             | 735.81   | 1 |
| tc Rep: 14-3-3 protein - Nicotiana tabacum (Common tobacco), complete [TC51445      | 563.2    | 1 |
| tc Rep: GAGA-motif binding transcriptional activator - Populus trichocarpa (Wester  | 2707.34  | 1 |
| tc Rep: Chromosome chr14 scaffold_21, whole genome shotgun sequence - Vitis vi      | 964.71   | 1 |
| gb KG9B.101D07F.060120T7 KG9B Nicotiana tabacum cDNA clone KG9B.101D07, n           | 221.99   | 1 |
| gb KF8B.100L14F.151010T7 KF8 Nicotiana tabacum cDNA clone KF8B.100L14, mRN          | 50.63    | 1 |
| tc Rep: RAN GTPase-activating protein 1 - Nicotiana benthamiana, partial (23%) [TC  | 265.06   | 1 |
| gb KG9B.103G15F.051128T7 KG9B Nicotiana tabacum cDNA clone KG9B.103G15, n           | 79.04    | 1 |
| gb Nicotiana tabacum Tobacco mosaic virus helicase domain-binding protein mRN/      | 145.63   | 1 |
| tc Rep: Prohibitin - Nicotiana tabacum (Common tobacco), complete [TC52074]         | 21.92    | 1 |
| gb Nicotiana tabacum guanylate kinase (GK-1) mRNA, complete cds [AF205130]          | 5445.24  | 1 |
| Unknown                                                                             | 115.08   | 1 |
| tc Rep: Chromosome undetermined scaffold_203, whole genome shotgun sequenc          | 35453.05 | 1 |
| tc Rep: ATP synthase subunit beta, mitochondrial precursor - Nicotiana plumbagini   | 87.3     | 1 |



|                                                                                   |         |   |
|-----------------------------------------------------------------------------------|---------|---|
| gb KL4B.104B18F.051104T7 KL4B Nicotiana tabacum cDNA clone KL4B.104B18, mR        | 24.25   | 1 |
| tc Rep: Chromosome chr10 scaffold_81, whole genome shotgun sequence - Vitis vi    | 61.98   | 1 |
| gb KG9B.107G06F.060120T7 KG9B Nicotiana tabacum cDNA clone KG9B.107G06, n         | 22.74   | 1 |
| tc Rep: Chromosome chr3 scaffold_8, whole genome shotgun sequence - Vitis vinif   | 37.54   | 1 |
| Unknown                                                                           | 2826.36 | 1 |
| gb KG9B.107L18F.060120T7 KG9B Nicotiana tabacum cDNA clone KG9B.107L18, m         | 895.95  | 1 |
| gb Nicotiana tabacum calcium [AF435450]                                           | 30.34   | 1 |
| tc Rep: STYLOSA protein - Antirrhinum majus (Garden snapdragon), partial (29%) [T | 120.56  | 1 |
| gb KF8C.106P02F.051215T7 KF8 Nicotiana tabacum cDNA clone KF8C.106P02, mRN        | 127.84  | 1 |
| Unknown                                                                           | 203.28  | 1 |
| gb KF8C.104H23F.051214T7 KF8 Nicotiana tabacum cDNA clone KF8C.104H23, mRI        | 2111.04 | 1 |
| tc Rep: Chromosome chr11 scaffold_13, whole genome shotgun sequence - Vitis vi    | 147.18  | 1 |
| tc Rep: AN14 - Zea mays (Maize), partial (75%) [TC44451]                          | 519.1   | 1 |
| Unknown                                                                           | 80.62   | 1 |
| gb EST_YP002xa17f1.ab1 EST_YP Nicotiana tabacum cDNA, mRNA sequence [EH61         | 125.3   | 1 |
| gb TT-22_F04 Samsun trichome library Nicotiana tabacum cDNA, mRNA sequence        | 22.97   | 1 |
| tc Rep: Ribosomal protein L3A - Nicotiana tabacum (Common tobacco), partial (59%  | 44.99   | 1 |
| tc Rep: Threonine synthase, chloroplast precursor - Solanum tuberosum (Potato), p | 16.31   | 1 |
| tc Rep: Chromosome chr14 scaffold_9, whole genome shotgun sequence - Vitis vin    | 127.12  | 1 |
| gb AM843365 seedling library, SL Nicotiana tabacum cDNA clone nt002201085, mF     | 59.61   | 1 |
| Unknown                                                                           | 31.3    | 1 |
| Unknown                                                                           | 23.2    | 1 |
| tc Rep: Fructose-bisphosphate aldolase - Solanum tuberosum (Potato), partial (65% | 288.23  | 1 |
| Unknown                                                                           | 514.67  | 1 |
| gb BP528348 MAT001 Nicotiana tabacum cDNA clone BY13188, mRNA sequence [E         | 122.39  | 1 |
| tc Rep: TPK1 - Nicotiana tabacum (Common tobacco), complete [TC64081]             | 56.72   | 1 |
| tc Rep: Chromosome chr5 scaffold_64, whole genome shotgun sequence - Vitis vin    | 494.03  | 1 |
| gb KF8B.100P16F.151010T7 KF8 Nicotiana tabacum cDNA clone KF8B.100P16, mRN        | 507.97  | 1 |
| Unknown                                                                           | 749.75  | 1 |
| Unknown                                                                           | 61.79   | 1 |
| gb KP1B.001F04F.050628T7 KP1B Nicotiana tabacum cDNA clone KP1B.001F04, mF        | 329.96  | 1 |
| Unknown                                                                           | 158.32  | 1 |
| Unknown                                                                           | 29.68   | 1 |
| gb TT-22_N03 K326 early senescent leaf library Nicotiana tabacum cDNA, mRNA se    | 26.19   | 1 |

|                                                                                      |         |   |
|--------------------------------------------------------------------------------------|---------|---|
| Unknown                                                                              | 63.64   | 1 |
| Unknown                                                                              | 491.41  | 1 |
| Unknown                                                                              | 21.05   | 1 |
| Unknown                                                                              | 18.69   | 1 |
| Unknown                                                                              | 25.77   | 1 |
| gb AGN_RNC017xg05f1.ab1 AGN_RNC Nicotiana tabacum cDNA 5', mRNA sequenc              | 3165.36 | 1 |
| gb AGN_RNC014xe03f1.ab1 AGN_RNC Nicotiana tabacum cDNA 5', mRNA sequenc              | 70.34   | 1 |
| tc Rep: Chromosome chr18 scaffold_1, whole genome shotgun sequence - Vitis vin       | 136.37  | 1 |
| Unknown                                                                              | 103.02  | 1 |
| gb KL5B.001P11F.050901T7 KL5B Nicotiana tabacum cDNA clone KL5B.001P11, mR           | 268.15  | 1 |
| gb TT-07_H19 Samsun trichome library Nicotiana tabacum cDNA, mRNA sequence           | 281.48  | 1 |
| tc Rep: Chromosome chr1 scaffold_180, whole genome shotgun sequence - Vitis vi       | 94.61   | 1 |
| Unknown                                                                              | 500.83  | 1 |
| gb KT7C.112H24F.051221T7 KT7 Nicotiana tabacum cDNA clone KT7C.112H24, mR            | 1992.27 | 1 |
| gb FS407656 normalized full-length tobacco cDNA library Nicotiana tabacum cDNA       | 1775.58 | 1 |
| tc Rep: Os06g0186900 protein - Oryza sativa subsp. japonica (Rice), partial (41%) [T | 42.61   | 1 |
| tc Rep: Betaine aldehyde dehydrogenase - Panax ginseng (Korean ginseng), partial (   | 737.4   | 1 |
| Unknown                                                                              | 36273.1 | 1 |
| tc Rep: Neutral leucine aminopeptidase preprotein precursor - Solanum lycopersici    | 564.55  | 1 |
| gb KR3B.001D06F.050815T7 KR3B Nicotiana tabacum cDNA clone KR3B.001D06, m            | 134.49  | 1 |
| gb KP1B.108B16F.050726T7 KP1B Nicotiana tabacum cDNA clone KP1B.108B16, ml           | 271.21  | 1 |
| tc Rep: Transcription Factor IIF, Rap30/Rap74, interaction - Medicago truncatula (B  | 214.36  | 1 |
| Unknown                                                                              | 28.88   | 1 |
| Unknown                                                                              | 848.32  | 1 |
| gb AGN_RNC211xk21f1.ab1 AGN_RNC Nicotiana tabacum cDNA 5', mRNA sequenc              | 2673.21 | 1 |
| gb TT-18_N15 Burley21 trichome library Nicotiana tabacum cDNA, mRNA sequenc          | 86.08   | 1 |
| tc Rep: Chromosome chr11 scaffold_13, whole genome shotgun sequence - Vitis vi       | 130.81  | 1 |
| Unknown                                                                              | 65.86   | 1 |
| gb AJ632923 Nicotiana tabacum leaf Nicotiana tabacum cDNA clone Nt05-B07, mR         | 26.73   | 1 |
| gb AGN_RNC007xf18f1.ab1 AGN_RNC Nicotiana tabacum cDNA 5', mRNA sequenc              | 47.2    | 1 |
| gb Nicotiana tabacum partial mRNA for villin 2 (vln2 gene) [AJ577853]                | 4157.97 | 1 |
| tc Rep: Polyubiquitin - Fragaria ananassa (Strawberry), partial (48%) [TC46813]      | 18125.3 | 1 |
| tc Rep: Chromosome undetermined scaffold_310, whole genome shotgun sequenc           | 757.32  | 1 |
| gb CHO_SL005xh14f1.ab1 CHO_SL Nicotiana tabacum cDNA, mRNA sequence [EH6             | 66.45   | 1 |

|                                                                                         |         |   |
|-----------------------------------------------------------------------------------------|---------|---|
| tc Rep: Chromosome chr5 scaffold_64, whole genome shotgun sequence - Vitis vin          | 1023.16 | 1 |
| tc Rep: Splicing factor-like - Oryza sativa subsp. japonica (Rice), partial (12%) [TC68 | 249.09  | 1 |
| gb KN6B.106I23F.060104T7 KN6B Nicotiana tabacum cDNA clone KN6B.106I23, mF              | 458.14  | 1 |
| Unknown                                                                                 | 865.51  | 1 |
| Unknown                                                                                 | 31.8    | 1 |
| tc Rep: Chromosome chr5 scaffold_64, whole genome shotgun sequence - Vitis vin          | 37.42   | 1 |
| tc Rep: 60S ribosomal protein L34 - Nicotiana tabacum (Common tobacco), comple          | 66.95   | 1 |
| gb TT-07_C15 K326 early senescent leaf library Nicotiana tabacum cDNA, mRNA se          | 2673.14 | 1 |
| Unknown                                                                                 | 92.17   | 1 |
| tc Rep: Chromosome chr3 scaffold_199, whole genome shotgun sequence - Vitis vi          | 103.69  | 1 |
| tc Rep: Mitochondrial processing peptidase - Solanum tuberosum (Potato), partial i      | 93.99   | 1 |
| tc Rep: Chromosome undetermined scaffold_332, whole genome shotgun sequenc              | 68.72   | 1 |
| Unknown                                                                                 | 65.67   | 1 |
| tc Rep: Serine hydroxymethyltransferase - Vitis vinifera (Grape), partial (55%) [TC5t   | 19.8    | 1 |
| gb KN6B.009A01F.050901T7 KN6B Nicotiana tabacum cDNA clone KN6B.009A01, n               | 40.17   | 1 |
| tc Rep: Chromosome chr16 scaffold_10, whole genome shotgun sequence - Vitis vi          | 64.02   | 1 |
| gb KR3B.109O22F.051111T7 KR3B Nicotiana tabacum cDNA clone KR3B.109O22, m               | 56.31   | 1 |
| Unknown                                                                                 | 96.28   | 1 |
| Unknown                                                                                 | 4579.52 | 1 |
| Unknown                                                                                 | 104.16  | 1 |
| gb KT7B.107A11F.060124T7 KT7 Nicotiana tabacum cDNA clone KT7B.107A11, mRI              | 20.93   | 1 |
| tc Rep: Chromosome chr7 scaffold_31, whole genome shotgun sequence - Vitis vin          | 35.66   | 1 |
| tc Rep: Farnesyl pyrophosphate synthase - Solanum lycopersicum (Tomato) (Lycop          | 133.64  | 1 |
| Unknown                                                                                 | 208.58  | 1 |
| gb TT-16_H13 K326 early senescent leaf library Nicotiana tabacum cDNA, mRNA se          | 32.97   | 1 |
| Unknown                                                                                 | 35.93   | 1 |
| tc Rep: Asparagine synthetase - Helianthus annuus (Common sunflower), partial (2        | 68.82   | 1 |
| gb KL4B.103P04F.051103T7 KL4B Nicotiana tabacum cDNA clone KL4B.103P04, mR              | 6937.11 | 1 |
| tc Rep: ATP:citrate lyase - Capsicum annuum (Bell pepper), partial (24%) [TC62642]      | 471.89  | 1 |
| gb KT7C.108M22F.051219T7 KT7 Nicotiana tabacum cDNA clone KT7C.108M22, mI               | 65.53   | 1 |
| gb KF8B.200I11F.060120T7 KF8 Nicotiana tabacum cDNA clone KF8B.200I11, mRN              | 43573.3 | 1 |
| gb KL4B.101K21F.051103T7 KL4B Nicotiana tabacum cDNA clone KL4B.101K21, mR              | 85.48   | 1 |
| tc Rep: Dihydrolipoyllysine-residue acetyltransferase component 3 of pyruvate deh       | 1556.96 | 1 |
| gb TT-08_D07 Burley21 trichome library Nicotiana tabacum cDNA, mRNA sequence            | 130.68  | 1 |

|                                                                                       |          |   |
|---------------------------------------------------------------------------------------|----------|---|
| tc Rep: Chromosome undetermined scaffold_3075, whole genome shotgun sequen            | 81.57    | 1 |
| Unknown                                                                               | 11135.25 | 1 |
| Unknown                                                                               | 186.5    | 1 |
| tc Rep: Chromosome chr5 scaffold_2, whole genome shotgun sequence - Vitis vinif       | 111.49   | 1 |
| Unknown                                                                               | 152.47   | 1 |
| gb AGN_PNL208bf1_c6.trimmed.seq AGN_PNL Nicotiana tabacum cDNA 5', mRNA               | 218.6    | 1 |
| tc Rep: Chromosome undetermined scaffold_161, whole genome shotgun sequenc            | 31.74    | 1 |
| Unknown                                                                               | 119.91   | 1 |
| gb AGN_PNL227cf1_g8.trimmed.seq AGN_PNL Nicotiana tabacum cDNA 5', mRNA               | 16999.55 | 1 |
| gb Nicotiana tabacum MADS-box protein MADS5 (NtMADS5) mRNA, complete cds              | 87.02    | 1 |
| Unknown                                                                               | 158.36   | 1 |
| Unknown                                                                               | 88.8     | 1 |
| tc Rep: Phosphoglycerate kinase, chloroplast precursor - Nicotiana tabacum (Comn      | 19.32    | 1 |
| Unknown                                                                               | 26.37    | 1 |
| Unknown                                                                               | 935.42   | 1 |
| tc Rep: Phosphatidic acid phosphatase alpha - Vigna unguiculata (Cowpea), partial (   | 84.36    | 1 |
| gb AM816248 DL, diurnal library Nicotiana tabacum cDNA clone nt005094030, mRI         | 9804.92  | 1 |
| tc Rep: Chromosome undetermined scaffold_3017, whole genome shotgun sequen            | 272.44   | 1 |
| Unknown                                                                               | 822.82   | 1 |
| Unknown                                                                               | 50112.6  | 1 |
| Unknown                                                                               | 559.26   | 1 |
| tc Rep: Chromosome chr8 scaffold_23, whole genome shotgun sequence - Vitis vin        | 67.62    | 1 |
| tc Rep: Superoxide dismutase [Cu-Zn] - Nicotiana plumbaginifolia (Leadwort-leavec     | 1016.59  | 1 |
| Unknown                                                                               | 566.4    | 1 |
| gb KF8B.201D11F.060124T7 KF8 Nicotiana tabacum cDNA clone KF8B.201D11, mRI            | 370.82   | 1 |
| tc Rep: Cryptic phage CTXphi transcriptional repressor rstR - Vibrio cholerae, partia | 406      | 1 |
| gb AM785983 seedling library, SL Nicotiana tabacum cDNA clone nt002287087, mF         | 18.71    | 1 |
| gb KF8C.103C08F.051214T7 KF8 Nicotiana tabacum cDNA clone KF8C.103C08, mRN            | 473.53   | 1 |
| tc Rep: Chromosome chr6 scaffold_25, whole genome shotgun sequence - Vitis vin        | 1816.18  | 1 |
| tc Rep: Os09g0505800 protein - Oryza sativa subsp. japonica (Rice), partial (86%) [T  | 16.95    | 1 |
| tc Rep: Sterol desaturase family protein - Solanum demissum (Wild potato), partial    | 344.33   | 1 |
| gb TT-29_O23 Samsun trichome library Nicotiana tabacum cDNA, mRNA sequence            | 521.62   | 1 |
| gb TOBESTR053C09 TOBEST cDNA library 1 Nicotiana tabacum cDNA 5', mRNA seqi           | 30.67    | 1 |
| gb AGN_RNC004xn01f1.ab1 AGN_RNC Nicotiana tabacum cDNA 5', mRNA sequenc               | 630.59   | 1 |

|                                                                                   |         |   |
|-----------------------------------------------------------------------------------|---------|---|
| gb KG9B.106H08F.051129T7 KG9B Nicotiana tabacum cDNA clone KG9B.106H08, n         | 35.45   | 1 |
| tc Rep: Cytochrome c1-1, heme protein, mitochondrial precursor - Solanum tubero   | 229.7   | 1 |
| tc Rep: Phospho-2-dehydro-3-deoxyheptonate aldolase 2, chloroplast precursor - S  | 906.82  | 1 |
| gb KT7B.100K11F.051010T7 KT7 Nicotiana tabacum cDNA clone KT7B.100K11, mRN        | 897.34  | 1 |
| tc Rep: Chromosome chr16 scaffold_10, whole genome shotgun sequence - Vitis vi    | 159.24  | 1 |
| tc Rep: Chromosome chr14 scaffold_27, whole genome shotgun sequence - Vitis vi    | 113.36  | 1 |
| tc Rep: Chromosome chr1 scaffold_136, whole genome shotgun sequence - Vitis vi    | 498.53  | 1 |
| gb CHO_SL002xi14f1.ab1 CHO_SL Nicotiana tabacum cDNA, mRNA sequence [EH62         | 249.77  | 1 |
| Unknown                                                                           | 24.77   | 1 |
| Unknown                                                                           | 2715.54 | 1 |
| gb KG9B.004N23F.050721T7 KG9B Nicotiana tabacum cDNA clone KG9B.004N23, n         | 27.72   | 1 |
| gb KL4B.103N16F.051103T7 KL4B Nicotiana tabacum cDNA clone KL4B.103N16, mF        | 267.66  | 1 |
| Unknown                                                                           | 129.97  | 1 |
| Unknown                                                                           | 33.92   | 1 |
| tc Rep: Chromosome chr14 scaffold_27, whole genome shotgun sequence - Vitis vi    | 31.72   | 1 |
| tc Rep: Chromosome chr2 scaffold_11, whole genome shotgun sequence - Vitis vin    | 4702.13 | 1 |
| gb AGN_PNL221df1_h2.trimmed.seq AGN_PNL Nicotiana tabacum cDNA 5', mRNA           | 77.63   | 1 |
| gb AGN_ELP026xh16f1.ab1 AGN_ELP Nicotiana tabacum cDNA 5', mRNA sequence          | 3011.04 | 1 |
| gb AGN_RPC007xi20f1.ab1 AGN_RPC Nicotiana tabacum cDNA 5', mRNA sequence          | 9894.43 | 1 |
| tc Rep: Chromosome chr6 scaffold_3, whole genome shotgun sequence - Vitis vinif   | 139.56  | 1 |
| gb AGN_RPC024xe08f1.ab1 AGN_RPC Nicotiana tabacum cDNA 5', mRNA sequence          | 71.89   | 1 |
| Unknown                                                                           | 93.66   | 1 |
| gb KG9B.106C11F.051129T7 KG9B Nicotiana tabacum cDNA clone KG9B.106C11, m         | 142.51  | 1 |
| gb KF8C.106J12F.051215T7 KF8 Nicotiana tabacum cDNA clone KF8C.106J12, mRN        | 97.18   | 1 |
| gb KP1B.105L15F.060116T7 KP1B Nicotiana tabacum cDNA clone KP1B.105L15, mF        | 79.42   | 1 |
| tc Rep: Chromosome chr4 scaffold_6, whole genome shotgun sequence - Vitis vinif   | 174.57  | 1 |
| gb AGN_RPC011xp08f1.ab1 AGN_RPC Nicotiana tabacum cDNA 5', mRNA sequence          | 529.88  | 1 |
| gb KL4B.108H04F.051105T7 KL4B Nicotiana tabacum cDNA clone KL4B.108H04, mF        | 95.6    | 1 |
| gb AGN_RNC014xf15r1.ab1 AGN_RNC Nicotiana tabacum cDNA 3', mRNA sequenc           | 101.34  | 1 |
| tc Rep: Uncharacterized protein At2g33847.2 - Arabidopsis thaliana (Mouse-ear cre | 55.46   | 1 |
| tc Rep: Chromosome chr17 scaffold_12, whole genome shotgun sequence - Vitis vi    | 28.81   | 1 |
| gb KT7C.109K13F.051221T7 KT7 Nicotiana tabacum cDNA clone KT7C.109K13, mRN        | 1530.87 | 1 |
| gb EST_FLW001xe19f1.ab1 EST_FLW Nicotiana tabacum cDNA, mRNA sequence [El         | 43.83   | 1 |
| Unknown                                                                           | 22.76   | 1 |

|                                                                                                                                                                        |                         |             |
|------------------------------------------------------------------------------------------------------------------------------------------------------------------------|-------------------------|-------------|
| tc Rep: Oligouridylate binding protein - Nicotiana plumbaginifolia (Leadwort-leavec<br>Unknown                                                                         | 5641.94<br>310.61       | 1<br>1      |
| tc Rep: Chromosome undetermined scaffold_332, whole genome shotgun sequenc                                                                                             | 22.43                   | 1           |
| tc Rep: Anther ethylene-upregulated protein ER1 - Nicotiana tabacum (Common to<br>gb EST_CSP005xb11f1.ab1 EST_CSP Nicotiana tabacum cDNA, mRNA sequence [EH<br>Unknown | 71.5<br>47.73<br>766.65 | 1<br>1<br>1 |
| Unknown                                                                                                                                                                | 172.43                  | 1           |
| tc Rep: Histidinol dehydrogenase - Vitis vinifera (Grape), partial (94%) [TC73650]                                                                                     | 53.22                   | 1           |
| tc Rep: 3-dehydroquinate dehydratase / shikimate dehydrogenase isoform 2 - Nico                                                                                        | 23.86                   | 1           |
| tc Rep: Chromosome undetermined scaffold_489, whole genome shotgun sequenc                                                                                             | 539.23                  | 1           |
| tc Rep: Chromosome chr8 scaffold_23, whole genome shotgun sequence - Vitis vin                                                                                         | 268.34                  | 1           |
| tc Rep: Chromosome chr19 scaffold_4, whole genome shotgun sequence - Vitis vin                                                                                         | 154.05                  | 1           |
| tc Rep: Chromosome chr12 scaffold_36, whole genome shotgun sequence - Vitis vi                                                                                         | 1591.96                 | 1           |
| tc Rep: PHD5 - Glycine max (Soybean), partial (96%) [TC57518]                                                                                                          | 20.76                   | 1           |
| tc Rep: Spliceosomal protein - Solanum tuberosum (Potato), partial (35%) [TC5154:<br>Unknown                                                                           | 215.11<br>179.51        | 1<br>1      |
| gb KR3B.109O08F.051111T7 KR3B Nicotiana tabacum cDNA clone KR3B.109O08, m                                                                                              | 2163.94                 | 1           |
| gb KF8C.103F16F.051214T7 KF8 Nicotiana tabacum cDNA clone KF8C.103F16, mRN                                                                                             | 35.74                   | 1           |
| gb KL4B.101H07F.051103T7 KL4B Nicotiana tabacum cDNA clone KL4B.101H07, mF                                                                                             | 46.51                   | 1           |
| gb KP1B.105A01F.060116T7 KP1B Nicotiana tabacum cDNA clone KP1B.105A01, m                                                                                              | 189.69                  | 1           |
| gb KG9B.106F01F.051129T7 KG9B Nicotiana tabacum cDNA clone KG9B.106F01, m                                                                                              | 267.74                  | 1           |
| gb KP1B.037L14F.050628T7 KP1B Nicotiana tabacum cDNA clone KP1B.037L14, mR                                                                                             | 515.96                  | 1           |
| tc Rep: Pol polyprotein - Citrus paradisi (Grapefruit), partial (12%) [TC60940]                                                                                        | 86.19                   | 1           |
| gb Nicotiana tabacum fertilization-independent endosperm protein (FIE) mRNA, co                                                                                        | 29.37                   | 1           |
| gb KF8C.106P03F.051215T7 KF8 Nicotiana tabacum cDNA clone KF8C.106P03, mRN                                                                                             | 49329.35                | 1           |
| gb TT-28_F07 Samsun trichome library Nicotiana tabacum cDNA, mRNA sequence                                                                                             | 36.61                   | 1           |
| gb TT-03_F17 K326 early senescent leaf library Nicotiana tabacum cDNA, mRNA ser                                                                                        | 456.42                  | 1           |
| tc Rep: Chromosome chr5 scaffold_67, whole genome shotgun sequence - Vitis vin                                                                                         | 351.83                  | 1           |
| gb AGN_ELP026xp07f1.ab1 AGN_ELP Nicotiana tabacum cDNA 5', mRNA sequence                                                                                               | 3633.99                 | 1           |
| tc Rep: Chromosome chr6 scaffold_3, whole genome shotgun sequence - Vitis vinif                                                                                        | 850.75                  | 1           |
| gb Nicotiana tabacum NtWRKY-9 mRNA for WRKY DNA-binding protein, complete c                                                                                            | 1121.97                 | 1           |
| Unknown                                                                                                                                                                | 472.76                  | 1           |
| tc Rep: Chromosome chr19 scaffold_4, whole genome shotgun sequence - Vitis vin                                                                                         | 143.92                  | 1           |
| tc Rep: Ubiquitin carrier protein - Vitis vinifera (Grape), complete [TC56781]                                                                                         | 2995.08                 | 1           |

|                                                                                         |          |   |
|-----------------------------------------------------------------------------------------|----------|---|
| gb KP1B.107M05F.050726T7 KP1B Nicotiana tabacum cDNA clone KP1B.107M05, r               | 185.72   | 1 |
| tc Rep: NT3 - Nicotiana tabacum (Common tobacco), partial (22%) [TC56605]               | 486.12   | 1 |
| tc Rep: Chromosome chr9 scaffold_7, whole genome shotgun sequence - Vitis vinifera      | 457.77   | 1 |
| tc Rep: Polygalacturonase inhibitor protein precursor - Solanum lycopersicum (Tomato)   | 498.45   | 1 |
| gb Nicotiana tabacum cDNA-AFLP-fragment BSTC3-33-350, cultivar Bright Yellow 2          | 243.53   | 1 |
| gb KG9B.103E14F.051128T7 KG9B Nicotiana tabacum cDNA clone KG9B.103E14, m               | 515.57   | 1 |
| Unknown                                                                                 | 34.76    | 1 |
| tc Rep: Chromosome chr8 scaffold_68, whole genome shotgun sequence - Vitis vinifera     | 187.42   | 1 |
| tc Rep: Chromosome chr9 scaffold_7, whole genome shotgun sequence - Vitis vinifera      | 25.03    | 1 |
| tc Rep: Embryonic flower 2 - Solanum lycopersicum (Tomato) (Lycopersicon esculentum)    | 417.95   | 1 |
| gb AM789368 seedling library, SL Nicotiana tabacum cDNA clone nt002018082, mF           | 522.29   | 1 |
| gb N.tabacum mRNA for phosphoglycerate kinase (chloroplast isoenzyme) [Z48977]          | 37.41    | 1 |
| tc Rep: Chromosome chr11 scaffold_56, whole genome shotgun sequence - Vitis vinifera    | 105.31   | 1 |
| tc Rep: Chromosome chr9 scaffold_90, whole genome shotgun sequence - Vitis vinifera     | 1024.61  | 1 |
| tc Rep: Chromosome chr16 scaffold_271, whole genome shotgun sequence - Vitis vinifera   | 1124.27  | 1 |
| gb AM812458 DL, diurnal library Nicotiana tabacum cDNA clone nt005112026, mRI           | 25.03    | 1 |
| Unknown                                                                                 | 31.27    | 1 |
| gb KP1B.037E06F.050623T7 KP1B Nicotiana tabacum cDNA clone KP1B.037E06, mF              | 32.23    | 1 |
| Unknown                                                                                 | 479.16   | 1 |
| tc Rep: Chromosome chr8 scaffold_29, whole genome shotgun sequence - Vitis vinifera     | 984.59   | 1 |
| gb AGN_PNL216bf1_g6.trimmed.seq AGN_PNL Nicotiana tabacum cDNA 5', mRNA                 | 62.46    | 1 |
| gb KL5B.112O22F.060215T7 KL5B Nicotiana tabacum cDNA clone KL5B.112O22, mF              | 59.14    | 1 |
| Unknown                                                                                 | 1552.87  | 1 |
| tc Rep: Calcineurin B-like protein 2-1 - Populus euphratica (Euphrates poplar), partial | 2147.19  | 1 |
| gb CHO_SL022xd02f1.ab1 CHO_SL Nicotiana tabacum cDNA, mRNA sequence [EH6]               | 465.12   | 1 |
| gb FS406815 normalized full-length tobacco cDNA library Nicotiana tabacum cDNA          | 58.19    | 1 |
| tc Rep: Phosphomevalonate kinase - Hevea brasiliensis (Para rubber tree), partial (:)   | 19.61    | 1 |
| tc Rep: Chromosome chr5 scaffold_72, whole genome shotgun sequence - Vitis vinifera     | 45.13    | 1 |
| tc Rep: Chromosome chr19 scaffold_4, whole genome shotgun sequence - Vitis vinifera     | 983.81   | 1 |
| gb BP133500 MAT001 Nicotiana tabacum cDNA clone BY5775, mRNA sequence [BF]              | 43284.85 | 1 |
| Unknown                                                                                 | 14698.55 | 1 |
| gb KR3B.114I17F.060119T7 KR3B Nicotiana tabacum cDNA clone KR3B.114I17, mRI             | 59.87    | 1 |
| Unknown                                                                                 | 77.81    | 1 |
| tc Rep: Chromosome chr19 scaffold_66, whole genome shotgun sequence - Vitis vinifera    | 84.74    | 1 |

|                                                                                        |         |   |
|----------------------------------------------------------------------------------------|---------|---|
| tc Rep: Chromosome chr3 scaffold_8, whole genome shotgun sequence - Vitis vinifera     | 241.33  | 1 |
| gb TT-38_H14 tobacco leaf library Nicotiana tabacum cDNA, mRNA sequence [FG6: Unknown] | 46.19   | 1 |
| Unknown                                                                                | 563.08  | 1 |
| tc Rep: Chromosome chr6 scaffold_15, whole genome shotgun sequence - Vitis vinifera    | 29.42   | 1 |
| gb Nicotiana tabacum cDNA-AFLP-fragment BSTT21-1-550, cultivar Bright Yellow 2         | 77.61   | 1 |
| gb AGN_ELP012xb20f1.ab1 AGN_ELP Nicotiana tabacum cDNA 5', mRNA sequence               | 21.82   | 1 |
| Unknown                                                                                | 1526.21 | 1 |
| Unknown                                                                                | 47.58   | 1 |
| gb CHO_SL006xj24f1.ab1 CHO_SL Nicotiana tabacum cDNA, mRNA sequence [EH61              | 2744.78 | 1 |
| gb CHO_SL022xm10f1.ab1 CHO_SL Nicotiana tabacum cDNA, mRNA sequence [EH61              | 45.13   | 1 |
| Unknown                                                                                | 20.84   | 1 |
| Unknown                                                                                | 43.12   | 1 |
| Unknown                                                                                | 105.31  | 1 |
| gb TT-29_D19 Samsun trichome library Nicotiana tabacum cDNA, mRNA sequence             | 969.12  | 1 |
| tc Rep: Phosphoserine aminotransferase - Arabidopsis thaliana (Mouse-ear cress),       | 1783.47 | 1 |
| gb AGN_RNC020xm19f1.ab1 AGN_RNC Nicotiana tabacum cDNA 5', mRNA sequen                 | 28.64   | 1 |
| gb EST_CSP005xn06f1.ab1 EST_CSP Nicotiana tabacum cDNA, mRNA sequence [EH              | 80.32   | 1 |
| Unknown                                                                                | 37.63   | 1 |
| gb KT7B.100B11F.051010T7 KT7 Nicotiana tabacum cDNA clone KT7B.100B11, mRf             | 61.32   | 1 |
| tc Rep: Chromosome chr2 scaffold_105, whole genome shotgun sequence - Vitis vi         | 505.6   | 1 |
| gb KP1B.001G12F.050628T7 KP1B Nicotiana tabacum cDNA clone KP1B.001G12, m              | 1177.87 | 1 |
| Unknown                                                                                | 252.31  | 1 |
| Unknown                                                                                | 57.35   | 1 |
| tc Rep: Chromosome undetermined scaffold_100, whole genome shotgun sequenc             | 92.06   | 1 |
| Unknown                                                                                | 171.14  | 1 |
| gb KN6B.105E09F.060104T7 KN6B Nicotiana tabacum cDNA clone KN6B.105E09, m              | 140.59  | 1 |
| tc Rep: Chromosome chr4 scaffold_162, whole genome shotgun sequence - Vitis vi         | 1085.23 | 1 |
| tc Rep: Chromosome chr19 scaffold_4, whole genome shotgun sequence - Vitis vi          | 457.72  | 1 |
| gb KG9B.102D18F.051126T7 KG9B Nicotiana tabacum cDNA clone KG9B.102D18, n              | 67.56   | 1 |
| Unknown                                                                                | 119.79  | 1 |
| gb FS409302 normalized full-length tobacco cDNA library Nicotiana tabacum cDNA         | 4166.64 | 1 |
| Unknown                                                                                | 133.55  | 1 |
| tc Rep: Chromosome chr14 scaffold_21, whole genome shotgun sequence - Vitis vi         | 569.87  | 1 |
| gb Nicotiana tabacum tetratricoredoxin mRNA, complete cds [AY064253]                   | 26.49   | 1 |



|                                                                                      |         |   |
|--------------------------------------------------------------------------------------|---------|---|
| gb KF8C.105F01F.051215T7 KF8 Nicotiana tabacum cDNA clone KF8C.105F01, mRN           | 2166.43 | 1 |
| Unknown                                                                              | 531.74  | 1 |
| gb KP1B.101L11F.050722T7 KP1B Nicotiana tabacum cDNA clone KP1B.101L11, mR           | 752.04  | 1 |
| Unknown                                                                              | 1512.81 | 1 |
| tc Rep: PttA' - Petunia hybrida (Petunia), partial (16%) [TC73454]                   | 286.14  | 1 |
| Unknown                                                                              | 157.22  | 1 |
| Unknown                                                                              | 1003.67 | 1 |
| Unknown                                                                              | 57.9    | 1 |
| Unknown                                                                              | 31.89   | 1 |
| Unknown                                                                              | 45.67   | 1 |
| tc Rep: GII2364 protein - Gloeobacter violaceus, partial (11%) [TC64550]             | 35.24   | 1 |
| gb TT-36_L21 K326 early senescent leaf library Nicotiana tabacum cDNA, mRNA seq      | 30.51   | 1 |
| gb N.tabacum dhps mRNA [X79675]                                                      | 207.47  | 1 |
| gb Nicotiana tabacum NtEIG-E80 mRNA, complete cds [AB041515]                         | 9613.23 | 1 |
| Unknown                                                                              | 205.03  | 1 |
| gb ntsm55 embryogenic microspores Nicotiana tabacum cDNA, mRNA sequence [E           | 218.85  | 1 |
| gb N.tabacum npp2 mRNA for protein phosphatase type 1 [Z93769]                       | 1331.83 | 1 |
| tc Rep: CA-responsive protein - Brassica oleracea (Wild cabbage), partial (7%) [TC56 | 28.21   | 1 |
| Unknown                                                                              | 44.03   | 1 |
| Unknown                                                                              | 141.98  | 1 |
| gb KL4B.103J09F.051103T7 KL4B Nicotiana tabacum cDNA clone KL4B.103J09, mRN          | 19.6    | 1 |
| gb AGN_PNL226bf1_d1.trimmed.seq AGN_PNL Nicotiana tabacum cDNA 5', mRNA              | 1104.04 | 1 |
| Unknown                                                                              | 1561.33 | 1 |
| gb KN6B.114I07F.060127T7 KN6B Nicotiana tabacum cDNA clone KN6B.114I07, mF           | 92.42   | 1 |
| gb KR3B.101B02F.051107T7 KR3B Nicotiana tabacum cDNA clone KR3B.101B02, m            | 1592.57 | 1 |
| tc Rep: RNA Binding Protein 45 - Nicotiana plumbaginifolia (Leadwort-leaved tobac    | 70.37   | 1 |
| gb TT-14_C13 tobacco leaf library Nicotiana tabacum cDNA, mRNA sequence [FG63        | 82.4    | 1 |
| tc Rep: STY-L protein - Antirrhinum majus (Garden snapdragon), partial (52%) [TC52   | 29.87   | 1 |
| gb KF8C.102A12F.051214T7 KF8 Nicotiana tabacum cDNA clone KF8C.102A12, mRN           | 76.84   | 1 |
| gb AGN_RNC025xm15f1.ab1 AGN_RNC Nicotiana tabacum cDNA 5', mRNA sequen               | 93.02   | 1 |
| gb AM789132 DL, diurnal library Nicotiana tabacum cDNA clone nt005072014, mRI        | 105.84  | 1 |
| Unknown                                                                              | 478.84  | 1 |
| gb TOBESTR043G10 TOBEST cDNA library 1 Nicotiana tabacum cDNA 5', mRNA seq           | 1009.86 | 1 |
| tc Rep: Chromosome chr7 scaffold_31, whole genome shotgun sequence - Vitis vin       | 871.96  | 1 |

|                                                                                         |          |   |
|-----------------------------------------------------------------------------------------|----------|---|
| tc Rep: Mitochondrial import receptor subunit TOM7-1 - Solanum tuberosum (Potato)       | 190.39   | 1 |
| gb CHO_SL026xf21f1.ab1 CHO_SL Nicotiana tabacum cDNA, mRNA sequence [EH62]              | 870.07   | 1 |
| Unknown                                                                                 | 20.08    | 1 |
| Unknown                                                                                 | 72.93    | 1 |
| gb Nicotiana tabacum basic helix-loop-helix protein mRNA, complete cds [EU88027]        | 4387.37  | 1 |
| tc Rep: Chromosome chr8 scaffold_106, whole genome shotgun sequence - Vitis vinifera    | 62.36    | 1 |
| tc Rep: Chromosome chr10 scaffold_43, whole genome shotgun sequence - Vitis vinifera    | 848.58   | 1 |
| tc Rep: Chromosome chr18 scaffold_24, whole genome shotgun sequence - Vitis vinifera    | 10185.17 | 1 |
| tc Rep: Chromosome chr16 scaffold_86, whole genome shotgun sequence - Vitis vinifera    | 398.83   | 1 |
| gb TT-04_N05 Samsun trichome library Nicotiana tabacum cDNA, mRNA sequence              | 159.96   | 1 |
| Unknown                                                                                 | 115.01   | 1 |
| gb AGN_PNL227af1_b10.trimmed.seq AGN_PNL Nicotiana tabacum cDNA 5', mRNA                | 134.84   | 1 |
| gb KF8C.102O14F.051214T7 KF8 Nicotiana tabacum cDNA clone KF8C.102O14, mRNA             | 1020.64  | 1 |
| tc Rep: Eukaryotic translation initiation factor 5A-1 - Nicotiana glauca                | 142.4    | 1 |
| tc Rep: Chromosome chr4 scaffold_39, whole genome shotgun sequence - Vitis vinifera     | 29.22    | 1 |
| gb KN6B.105G06F.060104T7 KN6B Nicotiana tabacum cDNA clone KN6B.105G06, mRNA            | 629.7    | 1 |
| gb CHO_SL004xl02f1.ab1 CHO_SL Nicotiana tabacum cDNA, mRNA sequence [EH61]              | 46.86    | 1 |
| gb AGN_RPC021xi20f1.ab1 AGN_RPC Nicotiana tabacum cDNA 5', mRNA sequence                | 103.43   | 1 |
| gb TT-11_H23 K326 early senescent leaf library Nicotiana tabacum cDNA, mRNA sequence    | 134.44   | 1 |
| tc Rep: Aluminum-induced protein - Codonopsis lanceolata, partial (97%) [TC40256]       | 67.44    | 1 |
| gb Nicotiana tabacum putative chloroplast ribonucleoprotein-like mRNA, partial sequence | 80.62    | 1 |
| Unknown                                                                                 | 117.35   | 1 |
| gb KF8C.103I13F.051214T7 KF8 Nicotiana tabacum cDNA clone KF8C.103I13, mRNA             | 1802.63  | 1 |
| tc Rep: Ammonium transporter 1 member 1 - Solanum lycopersicum (Tomato) (Lycopersicon)  | 243.73   | 1 |
| gb KR3B.001B04F.050815T7 KR3B Nicotiana tabacum cDNA clone KR3B.001B04, mRNA            | 787.49   | 1 |
| tc Rep: Hydrolase, alpha/beta hydrolase fold family precursor - Shewanella amazona      | 107.6    | 1 |
| tc Rep: Chromosome chr9 scaffold_7, whole genome shotgun sequence - Vitis vinifera      | 664.85   | 1 |
| gb TT-38_O13 Samsun trichome library Nicotiana tabacum cDNA, mRNA sequence              | 261.78   | 1 |
| gb AGN_PNL211df1_d4.trimmed.seq AGN_PNL Nicotiana tabacum cDNA 5', mRNA                 | 127.69   | 1 |
| gb AGN_RPC014xi23f1.ab1 AGN_RPC Nicotiana tabacum cDNA 5', mRNA sequence                | 99.26    | 1 |
| gb KL4B.101O20F.051103T7 KL4B Nicotiana tabacum cDNA clone KL4B.101O20, mRNA            | 21.36    | 1 |
| gb KT7B.100G14F.051010T7 KT7 Nicotiana tabacum cDNA clone KT7B.100G14, mRNA             | 92.18    | 1 |
| gb KF8C.105H23F.051215T7 KF8 Nicotiana tabacum cDNA clone KF8C.105H23, mRNA             | 2722.13  | 1 |
| Unknown                                                                                 | 31.2     | 1 |

|                                                                                       |         |   |
|---------------------------------------------------------------------------------------|---------|---|
| gb CHO_SL010xe03f1.ab1 CHO_SL Nicotiana tabacum cDNA, mRNA sequence [EH6              | 545.53  | 1 |
| gb TT-39_B05 Samsun trichome library Nicotiana tabacum cDNA, mRNA sequence            | 124.5   | 1 |
| tc Rep: COG0245: 2C-methyl-D-erythritol 2,4-cyclodiphosphate synthase - Pasteuri      | 559.42  | 1 |
| tc Rep: 60S ribosomal protein L31 - Nicotiana glutinosa (Tobacco), partial (98%) [TC  | 59.97   | 1 |
| gb AGN_PNL223df1_e10.trimmed.seq AGN_PNL Nicotiana tabacum cDNA 5', mRN               | 859.28  | 1 |
| Unknown                                                                               | 190.39  | 1 |
| tc Rep: Metal transporter - Solanum lycopersicum (Tomato) (Lycopersicon esculent      | 35.27   | 1 |
| tc Rep: Phytochelatin synthetase-like protein - Phaseolus vulgaris (Kidney bean) (Fr  | 26.95   | 1 |
| Unknown                                                                               | 108.49  | 1 |
| gb KG9B.105D04F.051128T7 KG9B Nicotiana tabacum cDNA clone KG9B.105D04, n             | 458.71  | 1 |
| Unknown                                                                               | 182.73  | 1 |
| gb TT-40_P15 Samsun trichome library Nicotiana tabacum cDNA, mRNA sequence            | 137.13  | 1 |
| tc Rep: 60S ribosomal protein L37a - Capsicum chinense (Scotch bonnet) (Bonnet p      | 200.51  | 1 |
| gb KL4B.109I20F.051106T7 KL4B Nicotiana tabacum cDNA clone KL4B.109I20, mRN           | 690.16  | 1 |
| Unknown                                                                               | 39.12   | 1 |
| gb KF8C.105F11F.051215T7 KF8 Nicotiana tabacum cDNA clone KF8C.105F11, mRN            | 395.47  | 1 |
| Unknown                                                                               | 26.69   | 1 |
| gb KL4B.112P08F.060131T7 KL4B Nicotiana tabacum cDNA clone KL4B.112P08, mR            | 25.88   | 1 |
| gb KF8B.200B21F.060120T7 KF8 Nicotiana tabacum cDNA clone KF8B.200B21, mRN            | 41.91   | 1 |
| gb KL4B.106A13F.051125T7 KL4B Nicotiana tabacum cDNA clone KL4B.106A13, mF            | 169.97  | 1 |
| tc Rep: Chromosome undetermined scaffold_168, whole genome shotgun sequenc            | 536.31  | 1 |
| gb KN6B.105M02F.060104T7 KN6B Nicotiana tabacum cDNA clone KN6B.105M02,               | 25.52   | 1 |
| gb Tobacco (N.tabacum) GapC mRNA encoding cytosolic glyceraldehyde-3-phospho          | 1308.17 | 1 |
| tc Rep: Chromosome chr14 scaffold_21, whole genome shotgun sequence - Vitis vi        | 20.92   | 1 |
| gb KF8C.110B02F.051216T7 KF8 Nicotiana tabacum cDNA clone KF8C.110B02, mRN            | 4583.45 | 1 |
| tc Rep: 60S ribosomal protein L10a-1 - Arabidopsis thaliana (Mouse-ear cress), part   | 129.02  | 1 |
| tc Rep: NAD-dependent malic enzyme 59 kDa isoform, mitochondrial precursor - Sc       | 864.88  | 1 |
| Unknown                                                                               | 17.62   | 1 |
| gb AM790347 DL, diurnal library Nicotiana tabacum cDNA clone nt005227037, mRI         | 1147.49 | 1 |
| Unknown                                                                               | 22.68   | 1 |
| tc Rep: Orotate phosphoribosyltransferase - Sulfolobus solfataricus, partial (8%) [T( | 67.22   | 1 |
| Unknown                                                                               | 219.04  | 1 |
| Unknown                                                                               | 209.03  | 1 |
| Unknown                                                                               | 22.78   | 1 |

|                                                                                   |         |   |
|-----------------------------------------------------------------------------------|---------|---|
| gb FS381087 normalized full-length tobacco cDNA library Nicotiana tabacum cDNA    | 4649.33 | 1 |
| gb AGN_ELP006xd03f1.ab1 AGN_ELP Nicotiana tabacum cDNA 5', mRNA sequence          | 38.53   | 1 |
| gb TOBESTR120F08 TOBEST cDNA library 1 Nicotiana tabacum cDNA 5', mRNA seq        | 698.89  | 1 |
| Unknown                                                                           | 62.75   | 1 |
| gb KG9B.102G13F.051126T7 KG9B Nicotiana tabacum cDNA clone KG9B.102G13, n         | 58.98   | 1 |
| tc Rep: Chromosome chr9 scaffold_7, whole genome shotgun sequence - Vitis vinif   | 2819.37 | 1 |
| tc Rep: Chromosome chr7 scaffold_44, whole genome shotgun sequence - Vitis vinif  | 50.31   | 1 |
| tc Rep: Dicarboxylate/tricarboxylate carrier - Nicotiana tabacum (Common tobacco) | 234.93  | 1 |
| tc Rep: Chromosome chr3 scaffold_8, whole genome shotgun sequence - Vitis vinif   | 227.55  | 1 |
| gb AGN_RNC019xk19f1.ab1 AGN_RNC Nicotiana tabacum cDNA 5', mRNA sequenc           | 25.61   | 1 |
| Unknown                                                                           | 249.63  | 1 |
| gb KL4B.103D04F.051103T7 KL4B Nicotiana tabacum cDNA clone KL4B.103D04, mF        | 1292.19 | 1 |
| gb N.tabacum mRNA for ornithine decarboxylase [Y10472]                            | 10546.4 | 1 |
| Unknown                                                                           | 3894.83 | 1 |
| gb KT7C.109N01F.051221T7 KT7 Nicotiana tabacum cDNA clone KT7C.109N01, mR         | 100.8   | 1 |
| gb KG9B.106F06F.051129T7 KG9B Nicotiana tabacum cDNA clone KG9B.106F06, m         | 24.99   | 1 |
| gb AGN_RNC002xm03f1.ab1 AGN_RNC Nicotiana tabacum cDNA 5', mRNA sequen            | 39.38   | 1 |
| Unknown                                                                           | 43.52   | 1 |
| tc Rep: SGT1 - Nicotiana benthamiana, partial (49%) [TC48609]                     | 186.89  | 1 |
| Unknown                                                                           | 78.26   | 1 |
| Unknown                                                                           | 32.72   | 1 |
| tc Rep: Ribosomal protein L33 - Castanea sativa (Sweet chestnut), complete [TC492 | 72.55   | 1 |
| Unknown                                                                           | 238.27  | 1 |
| gb 6.2B09 Transformed tobacco Lambda Zap II library Nicotiana tabacum cDNA 5', l  | 209.44  | 1 |
| tc Rep: Chromosome chr12 scaffold_38, whole genome shotgun sequence - Vitis vi    | 51      | 1 |
| Unknown                                                                           | 4041.04 | 1 |
| tc Rep: Chromosome chr16 scaffold_10, whole genome shotgun sequence - Vitis vi    | 47.88   | 1 |
| Unknown                                                                           | 21.98   | 1 |
| Unknown                                                                           | 1960.98 | 1 |
| gb KG9B.003O07F.050720T7 KG9B Nicotiana tabacum cDNA clone KG9B.003O07, r         | 94.99   | 1 |
| Unknown                                                                           | 17.95   | 1 |
| tc Rep: Chromosome chr7 scaffold_42, whole genome shotgun sequence - Vitis vinif  | 46      | 1 |
| tc Rep: Chromosome chr14 scaffold_27, whole genome shotgun sequence - Vitis vi    | 26.67   | 1 |
| tc Rep: Chromosome chr16 scaffold_86, whole genome shotgun sequence - Vitis vi    | 81.61   | 1 |

|                                                                                      |         |   |
|--------------------------------------------------------------------------------------|---------|---|
| tc Rep: Chromosome chr15 scaffold_40, whole genome shotgun sequence - Vitis vi       | 189.07  | 1 |
| gb KT7C.105P01F.051219T7 KT7 Nicotiana tabacum cDNA clone KT7C.105P01, mRN           | 103.81  | 1 |
| gb TT-15_O08 K326 late senescent leaf library Nicotiana tabacum cDNA, mRNA seq       | 367.9   | 1 |
| Unknown                                                                              | 223.4   | 1 |
| Unknown                                                                              | 104.83  | 1 |
| gb KT7C.110O01F.051221T7 KT7 Nicotiana tabacum cDNA clone KT7C.110O01, mR            | 522.31  | 1 |
| gb KT7B.100O20F.051010T7 KT7 Nicotiana tabacum cDNA clone KT7B.100O20, mR            | 302.21  | 1 |
| Unknown                                                                              | 50.24   | 1 |
| gb KG9B.105A19F.051128T7 KG9B Nicotiana tabacum cDNA clone KG9B.105A19, n            | 8182.38 | 1 |
| gb BP134817 MAT001 Nicotiana tabacum cDNA clone BY7260, mRNA sequence [BF            | 80.9    | 1 |
| gb Nicotiana tabacum mitogen-activated protein kinase Ntf4-1 mRNA, complete cc       | 1199.56 | 1 |
| gb AGN_RNC127xp13f1.ab1 AGN_RNC Nicotiana tabacum cDNA 5', mRNA sequenc              | 50.62   | 1 |
| Unknown                                                                              | 24.33   | 1 |
| Unknown                                                                              | 25.25   | 1 |
| tc Rep: Chromosome chr13 scaffold_17, whole genome shotgun sequence - Vitis vi       | 3227.76 | 1 |
| gb AM833831 DL, diurnal library Nicotiana tabacum cDNA clone nt005173074, mRI        | 217.92  | 1 |
| gb Nicotiana tabacum mRNA for phosphate translocator [X75088]                        | 413.9   | 1 |
| tc Rep: Chromosome chr2 scaffold_112, whole genome shotgun sequence - Vitis vi       | 33.43   | 1 |
| tc Rep: Phosphatidic acid phosphatase alpha - Vigna unguiculata (Cowpea), partial (  | 181.59  | 1 |
| gb TT-04_O15 K326 early senescent leaf library Nicotiana tabacum cDNA, mRNA se       | 283.77  | 1 |
| gb KT7C.106B13F.051219T7 KT7 Nicotiana tabacum cDNA clone KT7C.106B13, mRI           | 16738.6 | 1 |
| Unknown                                                                              | 26      | 1 |
| gb BP136509 MAT001 Nicotiana tabacum cDNA clone BY9112, mRNA sequence [BF            | 25.37   | 1 |
| gb KP1B.101N21F.050722T7 KP1B Nicotiana tabacum cDNA clone KP1B.101N21, m            | 66.59   | 1 |
| gb KP1B.105B05F.060116T7 KP1B Nicotiana tabacum cDNA clone KP1B.105B05, mI           | 120.53  | 1 |
| gb KF8C.101N16F.051214T7 KF8 Nicotiana tabacum cDNA clone KF8C.101N16, mRI           | 151.4   | 1 |
| tc Rep: Os05g0113500 protein - Oryza sativa subsp. japonica (Rice), partial (15%) [T | 3325.48 | 1 |
| gb TT-41_E09 Samsun trichome library Nicotiana tabacum cDNA, mRNA sequence           | 90.04   | 1 |
| Unknown                                                                              | 32.16   | 1 |
| gb TT-04_G09 K326 early senescent leaf library Nicotiana tabacum cDNA, mRNA se       | 41.35   | 1 |
| gb KN6B.102H23F.051230T7 KN6B Nicotiana tabacum cDNA clone KN6B.102H23, n            | 36.05   | 1 |
| tc Rep: Inorganic pyrophosphatase - Nicotiana tabacum (Common tobacco), compl        | 104.12  | 1 |
| Unknown                                                                              | 182.01  | 1 |
| gb KP1B.104D05F.050725T7 KP1B Nicotiana tabacum cDNA clone KP1B.104D05, m            | 77.49   | 1 |

|                                                                                      |          |   |
|--------------------------------------------------------------------------------------|----------|---|
| gb CHO_SL014xp06f1.ab1 CHO_SL Nicotiana tabacum cDNA, mRNA sequence [EH6             | 263.02   | 1 |
| Unknown                                                                              | 193.4    | 1 |
| gb KG9B.106G16F.051129T7 KG9B Nicotiana tabacum cDNA clone KG9B.106G16, n            | 3042.99  | 1 |
| gb AGN_ELP022xa22f1.ab1 AGN_ELP Nicotiana tabacum cDNA 5', mRNA sequence             | 41.31    | 1 |
| tc Rep: 40S ribosomal protein S4 - Solanum tuberosum (Potato), complete [TC4036      | 40.42    | 1 |
| Unknown                                                                              | 2425.02  | 1 |
| Unknown                                                                              | 43       | 1 |
| Unknown                                                                              | 147.36   | 1 |
| tc Rep: Chromosome chr2 scaffold_140, whole genome shotgun sequence - Vitis vi       | 235.94   | 1 |
| gb KL4B.107I09F.051126T7 KL4B Nicotiana tabacum cDNA clone KL4B.107I09, mRN          | 101.42   | 1 |
| gb CHO_SL015xf03f2.ab1 CHO_SL Nicotiana tabacum cDNA, mRNA sequence [EH6:            | 400.49   | 1 |
| gb KG9B.002J23F.050720T7 KG9B Nicotiana tabacum cDNA clone KG9B.002J23, mF           | 5128.09  | 1 |
| gb AGN_RPC010xj11f1.ab1 AGN_RPC Nicotiana tabacum cDNA 5', mRNA sequence             | 84.32    | 1 |
| tc Rep: Chromosome chr5 scaffold_2, whole genome shotgun sequence - Vitis vinif      | 1860.27  | 1 |
| gb AGN_RNC211xl23f1.ab1 AGN_RNC Nicotiana tabacum cDNA 5', mRNA sequenc              | 1104.26  | 1 |
| gb AM782821 seedling library, SL Nicotiana tabacum cDNA clone nt002335061, mF        | 392.3    | 1 |
| gb KL4B.104J12F.051104T7 KL4B Nicotiana tabacum cDNA clone KL4B.104J12, mRN          | 224.2    | 1 |
| Unknown                                                                              | 25.97    | 1 |
| tc Rep: Chromosome chr15 scaffold_40, whole genome shotgun sequence - Vitis vi       | 55.6     | 1 |
| tc Rep: Malate dehydrogenase - Nicotiana tabacum (Common tobacco), partial (58'      | 111.32   | 1 |
| Unknown                                                                              | 33.8     | 1 |
| Unknown                                                                              | 667.59   | 1 |
| tc Rep: Chromosome chr16 scaffold_10, whole genome shotgun sequence - Vitis vi       | 515.47   | 1 |
| gb KN6B.101B18F.051230T7 KN6B Nicotiana tabacum cDNA clone KN6B.101B18, n            | 2719.92  | 1 |
| Unknown                                                                              | 10285.9  | 1 |
| tc Rep: Chromosome chr7 scaffold_42, whole genome shotgun sequence - Vitis vin       | 77.58    | 1 |
| gb FS406206 normalized full-length tobacco cDNA library Nicotiana tabacum cDNA       | 127.71   | 1 |
| Unknown                                                                              | 28494.34 | 1 |
| gb KG9B.102J17F.051126T7 KG9B Nicotiana tabacum cDNA clone KG9B.102J17, mF           | 17.88    | 1 |
| tc Rep: Os04g0644200 protein - Oryza sativa subsp. japonica (Rice), partial (3%) [TC | 1059.96  | 1 |
| Unknown                                                                              | 152.18   | 1 |
| Unknown                                                                              | 71.38    | 1 |
| tc Rep: Chromosome chr9 scaffold_7, whole genome shotgun sequence - Vitis vinif      | 96.95    | 1 |
| tc Rep: Chromosome chr1 scaffold_5, whole genome shotgun sequence - Vitis vinif      | 1060.34  | 1 |

|                                                                                  |         |   |
|----------------------------------------------------------------------------------|---------|---|
| Unknown                                                                          | 253.69  | 1 |
| Unknown                                                                          | 1613.56 | 1 |
| gb BP530068 MAT005 Nicotiana tabacum cDNA clone BY21050, mRNA sequence [E        | 22.06   | 1 |
| Unknown                                                                          | 1827.79 | 1 |
| tc Rep: Chromosome chr6 scaffold_3, whole genome shotgun sequence - Vitis vinif  | 31.93   | 1 |
| tc Rep: Chromosome chr1 scaffold_5, whole genome shotgun sequence - Vitis vinif  | 598.68  | 1 |
| Unknown                                                                          | 163     | 1 |
| tc Rep: Protein kinase - Nicotiana tabacum (Common tobacco), partial (43%) [TC74 | 3485.68 | 1 |
| gb AGN_ELP022xo07f1.ab1 AGN_ELP Nicotiana tabacum cDNA 5', mRNA sequence         | 17.55   | 1 |
| Unknown                                                                          | 178.38  | 1 |
| gb TT-11_H13 K326 late senescent leaf library Nicotiana tabacum cDNA, mRNA seq   | 182.52  | 1 |
| gb TL13.002J10F.060117T7 TL13 Nicotiana tabacum cDNA clone TL13.002J10, mRN      | 256.33  | 1 |
| tc CAB62118.1 - Arabidopsis thaliana (Mouse-ear cress), partial (9%) [TC67043]   | 35.31   | 1 |
| gb Nicotiana tabacum NtRb1 mRNA, complete cds [AB015221]                         | 955     | 1 |
| gb FS377589 normalized full-length tobacco cDNA library Nicotiana tabacum cDNA   | 2549.83 | 1 |
| gb TT-50_B23 Samsun trichome library Nicotiana tabacum cDNA, mRNA sequence       | 206.32  | 1 |
| gb AGN_PNL227ar1_a9.trimmed.seq AGN_PNL Nicotiana tabacum cDNA 3', mRNA          | 264.14  | 1 |
| Unknown                                                                          | 2670.62 | 1 |
| gb KG9B.003P01F.050720T7 KG9B Nicotiana tabacum cDNA clone KG9B.003P01, m        | 829.35  | 1 |
| Unknown                                                                          | 46.57   | 1 |
| tc Rep: Chromosome chr4 scaffold_6, whole genome shotgun sequence - Vitis vinif  | 231.25  | 1 |
| gb KG9B.102H04F.051126T7 KG9B Nicotiana tabacum cDNA clone KG9B.102H04, n        | 8264.01 | 1 |
| gb TT-10_O09 K326 early senescent leaf library Nicotiana tabacum cDNA, mRNA se   | 522.02  | 1 |
| gb BP533083 MAT005 Nicotiana tabacum cDNA clone BY29136, mRNA sequence [E        | 470.53  | 1 |
| gb TT-41_B11 K326 late senescent leaf library Nicotiana tabacum cDNA, mRNA seq   | 377.71  | 1 |
| tc Rep: Chromosome chr10 scaffold_179, whole genome shotgun sequence - Vitis \   | 267.85  | 1 |
| gb EST_FLW001xk07f1.ab1 EST_FLW Nicotiana tabacum cDNA, mRNA sequence [E         | 483.25  | 1 |
| tc Rep: Chromosome undetermined scaffold_100, whole genome shotgun sequenc       | 65      | 1 |
| gb KG9B.101A23F.060120T7 KG9B Nicotiana tabacum cDNA clone KG9B.101A23, n        | 261.6   | 1 |
| Unknown                                                                          | 93.59   | 1 |
| Unknown                                                                          | 191.74  | 1 |
| Unknown                                                                          | 625.75  | 1 |
| gb KF8B.100J14F.151010T7 KF8 Nicotiana tabacum cDNA clone KF8B.100J14, mRN       | 22.86   | 1 |
| tc Rep: Chromosome undetermined scaffold_139, whole genome shotgun sequenc       | 21.5    | 1 |

|                                                                                          |         |   |
|------------------------------------------------------------------------------------------|---------|---|
| gb KL4B.106J20F.051125T7 KL4B Nicotiana tabacum cDNA clone KL4B.106J20, mRNA             | 20.53   | 1 |
| tc Rep: GRF zinc finger family protein - Oryza sativa subsp. japonica (Rice), partial (2 | 464.99  | 1 |
| tc Rep: Chromosome chr18 scaffold_59, whole genome shotgun sequence - Vitis vi           | 1583.65 | 1 |
| gb AGN_PNL229df1_e6.trimmed.seq AGN_PNL Nicotiana tabacum cDNA 5', mRNA                  | 237.54  | 1 |
| Unknown                                                                                  | 22.18   | 1 |
| Unknown                                                                                  | 143.45  | 1 |
| Unknown                                                                                  | 26.58   | 1 |
| Unknown                                                                                  | 184.09  | 1 |
| gb KG9B.105B06F.051128T7 KG9B Nicotiana tabacum cDNA clone KG9B.105B06, mRNA             | 19.48   | 1 |
| gb TT-19_K15 tobacco leaf library Nicotiana tabacum cDNA, mRNA sequence [FG63            | 5369.43 | 1 |
| tc Rep: Chromosome chr4 scaffold_32, whole genome shotgun sequence - Vitis vin           | 86.64   | 1 |
| Unknown                                                                                  | 77.28   | 1 |
| tc Rep: Chromosome undetermined scaffold_235, whole genome shotgun sequenc               | 49.33   | 1 |
| gb KR3B.102N16F.051107T7 KR3B Nicotiana tabacum cDNA clone KR3B.102N16, mRNA             | 4092.58 | 1 |
| gb KR3B.107H04F.051110T7 KR3B Nicotiana tabacum cDNA clone KR3B.107H04, mRNA             | 1825.9  | 1 |
| tc Rep: Chromosome chr12 scaffold_18, whole genome shotgun sequence - Vitis vi           | 104.85  | 1 |
| tc Rep: Chromosome chr6 scaffold_3, whole genome shotgun sequence - Vitis vinif          | 759.09  | 1 |
| gb BP525990 MAT001 Nicotiana tabacum cDNA clone BY10688, mRNA sequence [E                | 25.8    | 1 |
| gb KR3B.108D14F.051110T7 KR3B Nicotiana tabacum cDNA clone KR3B.108D14, mRNA             | 752.06  | 1 |
| Unknown                                                                                  | 100     | 1 |
| Unknown                                                                                  | 236.1   | 1 |
| gb KP1B.001L22F.050628T7 KP1B Nicotiana tabacum cDNA clone KP1B.001L22, mRNA             | 104.08  | 1 |
| Unknown                                                                                  | 148.96  | 1 |
| tc Rep: Glucose-6-phosphate/phosphate translocator 1, chloroplast precursor - Ara        | 232.99  | 1 |
| gb AGN_RNC124xo11f1.ab1 AGN_RNC Nicotiana tabacum cDNA 5', mRNA sequenc                  | 24.52   | 1 |
| gb AGN_RNC009xb01f1.ab1 AGN_RNC Nicotiana tabacum cDNA 5', mRNA sequenc                  | 182.63  | 1 |
| gb EST_CSP005xh22f1.ab1 EST_CSP Nicotiana tabacum cDNA, mRNA sequence [EH                | 142.07  | 1 |
| gb Nicotiana tabacum mRNA for WIPK, complete cds [D61377]                                | 191.21  | 1 |
| gb KP1B.001B10F.050628T7 KP1B Nicotiana tabacum cDNA clone KP1B.001B10, mRNA             | 1128.47 | 1 |
| gb ntsm55 embryogenic microspores Nicotiana tabacum cDNA, mRNA sequence [E               | 257.15  | 1 |
| tc Rep: Chromosome chr4 scaffold_162, whole genome shotgun sequence - Vitis vi           | 124.86  | 1 |
| tc Rep: At1g26740/T24P13_11 - Arabidopsis thaliana (Mouse-ear cress), partial (37        | 231.13  | 1 |
| tc Rep: Chromosome chr13 scaffold_48, whole genome shotgun sequence - Vitis vi           | 22.17   | 1 |
| gb KN6B.104B07F.060103T7 KN6B Nicotiana tabacum cDNA clone KN6B.104B07, mRNA             | 1219.21 | 1 |



|                                                                                    |          |   |
|------------------------------------------------------------------------------------|----------|---|
| tc Rep: Chromosome chr6 scaffold_25, whole genome shotgun sequence - Vitis vin     | 157.07   | 1 |
| tc Rep: Chromosome chr5 scaffold_64, whole genome shotgun sequence - Vitis vin     | 40.93    | 1 |
| gb KF8C.101M10F.051214T7 KF8 Nicotiana tabacum cDNA clone KF8C.101M10, mF          | 43.12    | 1 |
| Unknown                                                                            | 21.28    | 1 |
| gb KP1B.112I24F.060117T7 KP1B Nicotiana tabacum cDNA clone KP1B.112I24, mRI        | 1383.42  | 1 |
| tc Rep: Salicylic acid-activated MAP kinase - Nicotiana tabacum (Common tobacco)   | 184.9    | 1 |
| tc Rep: Chromosome chr7 scaffold_20, whole genome shotgun sequence - Vitis vin     | 464.16   | 1 |
| Unknown                                                                            | 41.21    | 1 |
| tc Rep: Chromosome chr4 scaffold_32, whole genome shotgun sequence - Vitis vin     | 587.5    | 1 |
| Unknown                                                                            | 24.63    | 1 |
| gb N.tabacum mRNA for ribonucleotide reductase, clone R1-1 [Y10861]                | 50.45    | 1 |
| tc Rep: Chromosome chr12 scaffold_57, whole genome shotgun sequence - Vitis vi     | 503.93   | 1 |
| gb AGN_RNC021xf21f1.ab1 AGN_RNC Nicotiana tabacum cDNA 5', mRNA sequenc            | 418.45   | 1 |
| tc Rep: Chromosome chr19 scaffold_4, whole genome shotgun sequence - Vitis vin     | 1779.75  | 1 |
| Unknown                                                                            | 28.42    | 1 |
| gb KL4B.103J22F.051103T7 KL4B Nicotiana tabacum cDNA clone KL4B.103J22, mRN        | 427.77   | 1 |
| gb KT7B.103B20F.060124T7 KT7 Nicotiana tabacum cDNA clone KT7B.103B20, mRI         | 20.15    | 1 |
| gb TT-48_F19 Burley21 trichome library Nicotiana tabacum cDNA, mRNA sequence       | 26.67    | 1 |
| tc Rep: Chromosome chr14 scaffold_26, whole genome shotgun sequence - Vitis vi     | 9414.19  | 1 |
| gb CHO_SL007xk13f2.ab1 CHO_SL Nicotiana tabacum cDNA, mRNA sequence [EH6.          | 31.74    | 1 |
| tc Rep: Chromosome chr7 scaffold_42, whole genome shotgun sequence - Vitis vin     | 44.55    | 1 |
| gb TT-31_B14 K326 trichome library Nicotiana tabacum cDNA, mRNA sequence [FC       | 57.42    | 1 |
| gb KT7B.103G18F.060124T7 KT7 Nicotiana tabacum cDNA clone KT7B.103G18, mR          | 32.39    | 1 |
| gb KN6B.115H07F.060127T7 KN6B Nicotiana tabacum cDNA clone KN6B.115H07, n          | 60.09    | 1 |
| tc Rep: Chromosome chr12 scaffold_36, whole genome shotgun sequence - Vitis vi     | 25.42    | 1 |
| gb ntsm1 embryogenic microspores Nicotiana tabacum cDNA, mRNA sequence [EB         | 101.57   | 1 |
| tc Rep: Chromosome chr7 scaffold_31, whole genome shotgun sequence - Vitis vin     | 1592.78  | 1 |
| tc Rep: Chromosome chr11 scaffold_13, whole genome shotgun sequence - Vitis vi     | 566.64   | 1 |
| gb KT7C.102J01F.051216T7 KT7 Nicotiana tabacum cDNA clone KT7C.102J01, mRN.        | 70.52    | 1 |
| gb KN6B.100O15F.051019T7 KN6B Nicotiana tabacum cDNA clone KN6B.100O15, r          | 40.59    | 1 |
| Unknown                                                                            | 151.67   | 1 |
| tc Rep: ATP synthase subunit d, mitochondrial - Arabidopsis thaliana (Mouse-ear cr | 462.03   | 1 |
| Unknown                                                                            | 17084.85 | 1 |
| tc Rep: Chromosome chr9 scaffold_7, whole genome shotgun sequence - Vitis vinif    | 169.84   | 1 |

|                                                                                       |         |   |
|---------------------------------------------------------------------------------------|---------|---|
| gb TT-32_M09 K326 late senescent leaf library Nicotiana tabacum cDNA, mRNA seq        | 223.15  | 1 |
| gb AGN_RNC023xk18f1.ab1 AGN_RNC Nicotiana tabacum cDNA 5', mRNA sequenc               | 23      | 1 |
| tc Rep: Ribosomal protein L11-like - Nicotiana tabacum (Common tobacco), comple       | 402.58  | 1 |
| tc Rep: Plastoglobulin-1, chloroplast precursor - Pisum sativum (Garden pea), parti   | 145.98  | 1 |
| Unknown                                                                               | 9461.27 | 1 |
| gb KG9B.005P17F.050721T7 KG9B Nicotiana tabacum cDNA clone KG9B.005P17, m             | 1819.8  | 1 |
| Unknown                                                                               | 57.59   | 1 |
| tc Rep: COME operon protein 1 - Streptococcus pyogenes serotype M4 (strain MGA        | 460.32  | 1 |
| gb KR2B.112K16F.051230T7 KR2B Nicotiana tabacum cDNA clone KR2B.112K16, ml            | 140.38  | 1 |
| tc Rep: Oxysterol-binding protein, expressed - Oryza sativa subsp. japonica (Rice), p | 24.24   | 1 |
| Unknown                                                                               | 116.09  | 1 |
| gb TT-11_D05 K326 early senescent leaf library Nicotiana tabacum cDNA, mRNA se        | 26.66   | 1 |
| gb KN6B.102M01F.051230T7 KN6B Nicotiana tabacum cDNA clone KN6B.102M01,               | 38362.5 | 1 |
| tc Rep: NADH dehydrogenase - Arabidopsis thaliana (Mouse-ear cress), partial (74      | 331.15  | 1 |
| gb KL4B.101G23F.051103T7 KL4B Nicotiana tabacum cDNA clone KL4B.101G23, mF            | 61.94   | 1 |
| gb KP1B.110N11F.050727T7 KP1B Nicotiana tabacum cDNA clone KP1B.110N11, m             | 8033.46 | 1 |
| tc Rep: Chromosome undetermined scaffold_129, whole genome shotgun sequenc            | 189.92  | 1 |
| gb KN6B.102D06F.051230T7 KN6B Nicotiana tabacum cDNA clone KN6B.102D06, n             | 83.2    | 1 |
| Unknown                                                                               | 22.5    | 1 |
| Unknown                                                                               | 108.7   | 1 |
| gb TT-07_E11 K326 early senescent leaf library Nicotiana tabacum cDNA, mRNA sei       | 79.55   | 1 |
| gb TT-36_E22 Burley21 trichome library Nicotiana tabacum cDNA, mRNA sequence          | 151.8   | 1 |
| gb TT-29_L17 K326 late senescent leaf library Nicotiana tabacum cDNA, mRNA seqi       | 22.39   | 1 |
| tc Rep: DnaJ-like protein - Glycine max (Soybean), partial (55%) [TC64413]            | 799.19  | 1 |
| tc Rep: Ly200 protein - Capsicum annuum (Bell pepper), complete [TC52727]             | 58.31   | 1 |
| gb KR3B.111A19F.060119T7 KR3B Nicotiana tabacum cDNA clone KR3B.111A19, m             | 32.76   | 1 |
| Unknown                                                                               | 211.73  | 1 |
| tc Rep: Chromosome undetermined scaffold_235, whole genome shotgun sequenc            | 25.42   | 1 |
| gb KL5B.105P01F.060224T7 KL5B Nicotiana tabacum cDNA clone KL5B.105P01, mR            | 146.43  | 1 |
| gb N.tabacum mRNA for 14-3-3-like protein (A) [Y11212]                                | 1237.08 | 1 |
| gb AGN_PNL219af1_f4.trimmed.seq AGN_PNL Nicotiana tabacum cDNA 5', mRNA               | 1599.38 | 1 |
| tc Rep: Vesicle transport v-SNARE 11-like - Solanum tuberosum (Potato), complete      | 766.28  | 1 |
| tc Rep: Chromosome chr10 scaffold_76, whole genome shotgun sequence - Vitis vi        | 4428.33 | 1 |
| gb KR3B.107K23F.051110T7 KR3B Nicotiana tabacum cDNA clone KR3B.107K23, ml            | 36.18   | 1 |

|                                                                                    |         |   |
|------------------------------------------------------------------------------------|---------|---|
| Unknown                                                                            | 20.97   | 1 |
| tc Rep: Zinc finger A20 and AN1 domain-containing stress-associated protein 8 - Or | 3572.72 | 1 |
| tc Rep: Chromosome chr4 scaffold_32, whole genome shotgun sequence - Vitis vin     | 248.11  | 1 |
| Unknown                                                                            | 19.11   | 1 |
| gb KP1B.113H03F.060117T7 KP1B Nicotiana tabacum cDNA clone KP1B.113H03, m          | 31.85   | 1 |
| tc Rep: Bax inhibitor - Solanum lycopersicum (Tomato) (Lycopersicon esculentum),   | 1147.59 | 1 |
| Unknown                                                                            | 179.48  | 1 |
| Unknown                                                                            | 355.61  | 1 |
| Unknown                                                                            | 42.04   | 1 |
| gb KR3B.111G08F.060119T7 KR3B Nicotiana tabacum cDNA clone KR3B.111G08, m          | 1176.43 | 1 |
| tc Rep: Chromosome chr12 scaffold_36, whole genome shotgun sequence - Vitis vi     | 588.55  | 1 |
| gb TT-36_L19 K326 late senescent leaf library Nicotiana tabacum cDNA, mRNA seqi    | 27.92   | 1 |
| gb Nicotiana tabacum cDNA-AFLP-fragment BSTC3-42-285, cultivar Bright Yellow 2     | 440.3   | 1 |
| Unknown                                                                            | 34.79   | 1 |
| gb AM803406 seedling library, SL Nicotiana tabacum cDNA clone nt002129011, mF      | 21.84   | 1 |
| tc Rep: Chromosome chr5 scaffold_2, whole genome shotgun sequence - Vitis vinif    | 1236.34 | 1 |
| tc Rep: Chromosome chr18 scaffold_24, whole genome shotgun sequence - Vitis vi     | 58.03   | 1 |
| gb AGN_ELP025xh21f1.ab1 AGN_ELP Nicotiana tabacum cDNA 5', mRNA sequence           | 1844.06 | 1 |
| gb AGN_RNC030xe05f1.ab1 AGN_RNC Nicotiana tabacum cDNA 5', mRNA sequenc            | 58.97   | 1 |
| gb TL13.102M08F.060313T7 TL13 Nicotiana tabacum cDNA clone TL13.102M08, m          | 840.89  | 1 |
| tc Rep: Chromosome chr2 scaffold_132, whole genome shotgun sequence - Vitis vi     | 593.41  | 1 |
| gb KN6B.103B02F.060103T7 KN6B Nicotiana tabacum cDNA clone KN6B.103B02, n          | 3371.41 | 1 |
| Unknown                                                                            | 46.71   | 1 |
| tc Rep: Chromosome chr13 scaffold_17, whole genome shotgun sequence - Vitis vi     | 19.1    | 1 |
| tc Rep: Chromosome chr1 scaffold_46, whole genome shotgun sequence - Vitis vin     | 212.82  | 1 |
| gb AGN_ELP021xe05f1.ab1 AGN_ELP Nicotiana tabacum cDNA 5', mRNA sequence           | 54.03   | 1 |
| Unknown                                                                            | 6612.04 | 1 |
| tc Rep: Adenylate kinase, chloroplast - Zea mays (Maize), partial (91%) [TC42642]  | 25.83   | 1 |
| gb KR3B.105E15F.051109T7 KR3B Nicotiana tabacum cDNA clone KR3B.105E15, mI         | 107.18  | 1 |
| gb AM818174 seedling library, SL Nicotiana tabacum cDNA clone nt002012037, mF      | 50.09   | 1 |
| Unknown                                                                            | 219.72  | 1 |
| gb AGN_RNC022xi06f1.ab1 AGN_RNC Nicotiana tabacum cDNA 5', mRNA sequenc            | 63.19   | 1 |
| gb FS423755 normalized full-length tobacco cDNA library Nicotiana tabacum cDNA     | 2686.27 | 1 |
| tc Rep: Fumarylacetoacetase - Medicago truncatula (Barrel medic), partial (73%) [T | 84.27   | 1 |

|                                                                                      |         |   |
|--------------------------------------------------------------------------------------|---------|---|
| Unknown                                                                              | 481.87  | 1 |
| tc Rep: Chromosome chr7 scaffold_20, whole genome shotgun sequence - Vitis vin       | 137.96  | 1 |
| tc Rep: Diadenosine 5',5'''-P1,P4-tetraphosphate hydrolase - Lupinus angustifolius ( | 380.45  | 1 |
| tc Rep: Papain-like cysteine peptidase XBCP3 - Arabidopsis thaliana (Mouse-ear cre   | 7651.71 | 1 |
| tc Rep: Chromosome chr4 scaffold_32, whole genome shotgun sequence - Vitis vin       | 29.77   | 1 |
| gb KN6B.104D18F.060103T7 KN6B Nicotiana tabacum cDNA clone KN6B.104D18, n            | 518.81  | 1 |
| tc Rep: Chromosome chr15 scaffold_37, whole genome shotgun sequence - Vitis vi       | 24.99   | 1 |
| tc Rep: Chromosome chr6 scaffold_28, whole genome shotgun sequence - Vitis vin       | 532.04  | 1 |
| Unknown                                                                              | 24.44   | 1 |
| tc Rep: Chromosome chr17 scaffold_16, whole genome shotgun sequence - Vitis vi       | 508.88  | 1 |
| tc Rep: Chromosome chr9 scaffold_7, whole genome shotgun sequence - Vitis vinif      | 27.49   | 1 |
| gb TOBESTR130D05 TOBEST cDNA library 1 Nicotiana tabacum cDNA 5', mRNA seq           | 1109.41 | 1 |
| gb BP534995 MAT005 Nicotiana tabacum cDNA clone BY34204, mRNA sequence [E            | 133.99  | 1 |
| Unknown                                                                              | 80.35   | 1 |
| gb TT-39_L16 K326 early senescent leaf library Nicotiana tabacum cDNA, mRNA seq      | 127.41  | 1 |
| gb AGN_PNL225af1_b9.trimmed.seq AGN_PNL Nicotiana tabacum cDNA 5', mRNA              | 26.8    | 1 |
| gb KP1B.104N22F.050725T7 KP1B Nicotiana tabacum cDNA clone KP1B.104N22, m            | 7627.96 | 1 |
| gb KG9B.002L06F.050720T7 KG9B Nicotiana tabacum cDNA clone KG9B.002L06, m            | 1604.2  | 1 |
| Unknown                                                                              | 625.82  | 1 |
| tc Rep: Transcription factor APFI-like - Solanum tuberosum (Potato), partial (97%) [ | 412.67  | 1 |
| Unknown                                                                              | 7606.1  | 1 |
| gb TT-18_O23 K326 late senescent leaf library Nicotiana tabacum cDNA, mRNA seq       | 33.41   | 1 |
| tc Rep: Mitogen-activated protein kinase - Solanum lycopersicum (Tomato) (Lycop      | 743.36  | 1 |
| Unknown                                                                              | 29.59   | 1 |
| gb KP1B.102C20F.050722T7 KP1B Nicotiana tabacum cDNA clone KP1B.102C20, ml           | 366.11  | 1 |
| tc Rep: Chromosome chr16 scaffold_10, whole genome shotgun sequence - Vitis vi       | 1521.51 | 1 |
| tc Rep: Chromosome chr19 scaffold_126, whole genome shotgun sequence - Vitis v       | 30.99   | 1 |
| tc Rep: 60S ribosomal protein L19 - Capsicum annuum (Bell pepper), partial (32%) [   | 117.15  | 1 |
| tc Rep: Extensin - Nicotiana tabacum (Common tobacco), partial (98%) [TC76880]       | 176.91  | 1 |
| gb TT-09_B16 Samsun trichome library Nicotiana tabacum cDNA, mRNA sequence           | 222.1   | 1 |
| gb AGN_PNL229af1_a9.trimmed.seq AGN_PNL Nicotiana tabacum cDNA 5', mRNA              | 133.67  | 1 |
| gb TT-08_L08 K326 late senescent leaf library Nicotiana tabacum cDNA, mRNA seq       | 102.21  | 1 |
| Unknown                                                                              | 63.83   | 1 |
| tc Rep: Calcium-dependent protein kinase 8 - Nicotiana plumbaginifolia (Leadwort-    | 3284.45 | 1 |

|                                                                                      |         |   |
|--------------------------------------------------------------------------------------|---------|---|
| Unknown                                                                              | 970.39  | 1 |
| tc Rep: Chromosome undetermined scaffold_123, whole genome shotgun sequenc           | 19.17   | 1 |
| Unknown                                                                              | 80.48   | 1 |
| gb AGN_ELP018xl03f1.ab1 AGN_ELP Nicotiana tabacum cDNA 5', mRNA sequence             | 18.01   | 1 |
| tc Rep: Predicted protein - Physcomitrella patens subsp. patens, partial (43%) [TC5: | 153.02  | 1 |
| gb KR3B.111M22F.060119T7 KR3B Nicotiana tabacum cDNA clone KR3B.111M22, r            | 622.56  | 1 |
| gb AGN_RPC017xk02f1.ab1 AGN_RPC Nicotiana tabacum cDNA 5', mRNA sequence             | 67.81   | 1 |
| gb Nicotiana tabacum cDNA-AFLP-fragment BSTT2-14-500, cultivar Bright Yellow 2       | 33.92   | 1 |
| gb TT-22_G14 K326 early senescent leaf library Nicotiana tabacum cDNA, mRNA se       | 216.27  | 1 |
| gb AGN_RNC108xf20f1.ab1 AGN_RNC Nicotiana tabacum cDNA 5', mRNA sequenc              | 58.83   | 1 |
| tc Rep: Chromosome chr13 scaffold_210, whole genome shotgun sequence - Vitis \       | 48.9    | 1 |
| Unknown                                                                              | 24.93   | 1 |
| Unknown                                                                              | 18.27   | 1 |
| Unknown                                                                              | 41      | 1 |
| gb FTP P15 Tobacco stigma cDNA Nicotiana tabacum cDNA similar to PIP1 aquapor        | 134.99  | 1 |
| tc Rep: Chromosome chr3 scaffold_8, whole genome shotgun sequence - Vitis vinif      | 491.73  | 1 |
| Unknown                                                                              | 3086.38 | 1 |
| tc Rep: Chromosome chr7 scaffold_20, whole genome shotgun sequence - Vitis vin       | 91.71   | 1 |
| gb KF8C.103F17F.051214T7 KF8 Nicotiana tabacum cDNA clone KF8C.103F17, mRN           | 92.58   | 1 |
| gb KF8C.105J06F.051215T7 KF8 Nicotiana tabacum cDNA clone KF8C.105J06, mRN           | 2922.38 | 1 |
| gb KR2B.101F09F.060128T7 KR2B Nicotiana tabacum cDNA clone KR2B.101F09, mf           | 14946.2 | 1 |
| tc Rep: CXE carboxylesterase - Actinidia deliciosa (Kiwi), partial (57%) [TC50334]   | 55.64   | 1 |
| Unknown                                                                              | 28.56   | 1 |
| gb KP1B.104H11F.050725T7 KP1B Nicotiana tabacum cDNA clone KP1B.104H11, m            | 73.91   | 1 |
| gb AM826041 seedling library, SL Nicotiana tabacum cDNA clone nt002236018, mF        | 34.05   | 1 |
| tc Rep: 40S ribosomal protein S4 - Solanum tuberosum (Potato), complete [TC4292      | 27.61   | 1 |
| gb AGN_RPC020xp05f1.ab1 AGN_RPC Nicotiana tabacum cDNA 5', mRNA sequenc              | 198.82  | 1 |
| tc Rep: Chromosome chr9 scaffold_49, whole genome shotgun sequence - Vitis vin       | 338.2   | 1 |
| tc Rep: FACT complex subunit SPT16 - Zea mays (Maize), partial (46%) [TC57557]       | 437.44  | 1 |
| tc Rep: Alpha chain of nascent polypeptide associated complex - Nicotiana benth      | 107.08  | 1 |
| gb KR3B.114C14F.060119T7 KR3B Nicotiana tabacum cDNA clone KR3B.114C14, m            | 51.55   | 1 |
| tc Rep: Hexokinase 6 - Nicotiana tabacum (Common tobacco), complete [TC53358]        | 25.11   | 1 |
| tc Rep: Cullin 1A - Nicotiana tabacum (Common tobacco), partial (17%) [TC43631]      | 1255.82 | 1 |
| tc Rep: Acyl-[acyl-carrier-protein] desaturase, chloroplast precursor - Solanum tub  | 739.62  | 1 |

|                                                                                     |         |   |
|-------------------------------------------------------------------------------------|---------|---|
| tc Rep: Chromosome chr17 scaffold_16, whole genome shotgun sequence - Vitis vi      | 42.88   | 1 |
| gb KL5B.117D22F.060217T7 KL5B Nicotiana tabacum cDNA clone KL5B.117D22, mF          | 43.7    | 1 |
| Unknown                                                                             | 32.66   | 1 |
| tc Rep: Chromosome chr16 scaffold_86, whole genome shotgun sequence - Vitis vi      | 25.35   | 1 |
| tc Rep: MGC84401 protein - Xenopus laevis (African clawed frog), partial (5%) [TC7. | 23.98   | 1 |
| tc Rep: STYLOSA protein - Antirrhinum majus (Garden snapdragon), partial (45%) [T   | 185.6   | 1 |
| gb KT7C.110F01F.051221T7 KT7 Nicotiana tabacum cDNA clone KT7C.110F01, mRN          | 932.43  | 1 |
| gb KL4B.104F08F.051104T7 KL4B Nicotiana tabacum cDNA clone KL4B.104F08, mR          | 182.24  | 1 |
| tc Rep: Chromosome undetermined scaffold_69, whole genome shotgun sequence          | 262.78  | 1 |
| gb AM844046 seedling library, SL Nicotiana tabacum cDNA clone nt002335074, mF       | 300.62  | 1 |
| gb Nicotiana tabacum cDNA-AFLP-fragment BSTT12-4-420, cultivar Bright Yellow 2      | 64.49   | 1 |
| Unknown                                                                             | 27.5    | 1 |
| tc Rep: Phosphosulfolactate synthase-related protein - Solanum lycopersicum (Tom    | 312.54  | 1 |
| gb KL4B.112M18F.060131T7 KL4B Nicotiana tabacum cDNA clone KL4B.112M18, m           | 49.25   | 1 |
| gb KG9B.001M04F.050628T7 KG9B Nicotiana tabacum cDNA clone KG9B.001M04,             | 26.76   | 1 |
| Unknown                                                                             | 31.35   | 1 |
| gb KR3B.105E21F.051109T7 KR3B Nicotiana tabacum cDNA clone KR3B.105E21, mI          | 69.79   | 1 |
| gb AGN_PNL232ar1_h2.trimmed.seq AGN_PNL Nicotiana tabacum cDNA 3', mRNA             | 34.76   | 1 |
| gb KP1B.108H05F.050726T7 KP1B Nicotiana tabacum cDNA clone KP1B.108H05, m           | 108.23  | 1 |
| gb KP1B.037C20F.050623T7 KP1B Nicotiana tabacum cDNA clone KP1B.037C20, mI          | 80.13   | 1 |
| gb KR2B.115P20F.051230T7 KR2B Nicotiana tabacum cDNA clone KR2B.115P20, mI          | 2000.42 | 1 |
| gb KF8B.100G01F.051010T7 KF8 Nicotiana tabacum cDNA clone KF8B.100G01, mRI          | 185.11  | 1 |
| gb Nicotiana tabacum mRNA for NAD-dependent isocitrate dehydrogenase, clone f       | 266.61  | 1 |
| tc Rep: Jasmonic acid-amino acid-conjugating enzyme - Nicotiana attenuata, compl    | 24.75   | 1 |
| tc Rep: Chromosome undetermined scaffold_143, whole genome shotgun sequenc          | 87.22   | 1 |
| gb AGN_RPC015xi11f1.ab1 AGN_RPC Nicotiana tabacum cDNA 5', mRNA sequence            | 51.1    | 1 |
| gb KF8C.102M10F.051214T7 KF8 Nicotiana tabacum cDNA clone KF8C.102M10, mF           | 43      | 1 |
| gb KR2B.001C18F.050815T7 KR2B Nicotiana tabacum cDNA clone KR2B.001C18, m           | 106.26  | 1 |
| gb BP133968 MAT001 Nicotiana tabacum cDNA clone BY6288, mRNA sequence [BF           | 21.23   | 1 |
| Unknown                                                                             | 23.89   | 1 |
| tc Rep: Chromosome chr2 scaffold_105, whole genome shotgun sequence - Vitis vi      | 105.79  | 1 |
| gb KN6B.103H03F.060103T7 KN6B Nicotiana tabacum cDNA clone KN6B.103H03, n           | 189.99  | 1 |
| tc Rep: Chromosome chr17 scaffold_12, whole genome shotgun sequence - Vitis vi      | 149.47  | 1 |
| tc Rep: Calcium-dependent protein kinase 4 - Capsicum annuum (Bell pepper), part    | 22.48   | 1 |

|                                                                                              |          |   |
|----------------------------------------------------------------------------------------------|----------|---|
| Unknown                                                                                      | 111.18   | 1 |
| gb TT-25_O16 Samsun trichome library Nicotiana tabacum cDNA, mRNA sequence                   | 2972.62  | 1 |
| Unknown                                                                                      | 232      | 1 |
| gb KG9B.003L14F.050720T7 KG9B Nicotiana tabacum cDNA clone KG9B.003L14, m                    | 85.35    | 1 |
| tc Rep: GTP cyclohydrolase I - Solanum lycopersicum (Tomato) (Lycopersicon escul             | 961.4    | 1 |
| Unknown                                                                                      | 1566.41  | 1 |
| tc Rep: Chromosome chr11 scaffold_13, whole genome shotgun sequence - Vitis vi               | 11168.3  | 1 |
| tc Rep: Chromosome chr5 scaffold_67, whole genome shotgun sequence - Vitis vin               | 2827.95  | 1 |
| tc Rep: Chromosome chr3 scaffold_117, whole genome shotgun sequence - Vitis vi               | 59.71    | 1 |
| gb Nicotiana tabacum Rac-like GTPase 1 mRNA, complete cds [AY029330]                         | 1793.21  | 1 |
| tc GB AJ291736.1 CAC43321.1 putative beta proteasome subunit [Nicotiana tabac                | 29.33    | 1 |
| tc Rep: Chromosome chr8 scaffold_88, whole genome shotgun sequence - Vitis vin               | 25.62    | 1 |
| gb KN6B.104G15F.060103T7 KN6B Nicotiana tabacum cDNA clone KN6B.104G15, r                    | 867.78   | 1 |
| gb KF8B.202A04F.060124T7 KF8 Nicotiana tabacum cDNA clone KF8B.202A04, mRI                   | 42020.05 | 1 |
| Unknown                                                                                      | 74.57    | 1 |
| gb KG9B.002E23F.050720T7 KG9B Nicotiana tabacum cDNA clone KG9B.002E23, m                    | 135.86   | 1 |
| Unknown                                                                                      | 349.55   | 1 |
| Unknown                                                                                      | 22.45    | 1 |
| Unknown                                                                                      | 514.57   | 1 |
| tc Rep: Endoplasmic reticulum chaperone precursor - Catharanthus roseus (Rosy periwinkle) (N | 559.17   | 1 |
| gb AGN_RNC030xn21f1.ab1 AGN_RNC Nicotiana tabacum cDNA 5', mRNA sequenc                      | 24.58    | 1 |
| gb Nicotiana tabacum peroxisomal targeting signal 1 receptor (PEX5) mRNA, compl              | 91.42    | 1 |
| gb AGN_PNL212af1_e7.trimmed.seq AGN_PNL Nicotiana tabacum cDNA 5', mRNA                      | 1565.09  | 1 |
| gb KP1B.108B20F.050726T7 KP1B Nicotiana tabacum cDNA clone KP1B.108B20, ml                   | 739.37   | 1 |
| Unknown                                                                                      | 9069.23  | 1 |
| tc Rep: Ubiquitin carrier protein - Vitis vinifera (Grape), complete [TC44653]               | 567.74   | 1 |
| gb AM799834 COL, cold overnight library Nicotiana tabacum cDNA clone nt006142                | 26.23    | 1 |
| Unknown                                                                                      | 272.85   | 1 |
| gb KP1B.037G05F.050623T7 KP1B Nicotiana tabacum cDNA clone KP1B.037G05, m                    | 101.74   | 1 |
| gb FS412805 normalized full-length tobacco cDNA library Nicotiana tabacum cDNA               | 141.21   | 1 |
| tc Rep: Chromosome chr4 scaffold_32, whole genome shotgun sequence - Vitis vin               | 2761.69  | 1 |
| gb AM784309 DL, diurnal library Nicotiana tabacum cDNA clone nt005204030, mRI                | 33.6     | 1 |
| tc Rep: Chromosome undetermined scaffold_129, whole genome shotgun sequenc                   | 213.77   | 1 |
| tc Rep: Glyceraldehyde-3-phosphate dehydrogenase - Capsicum annuum (Bell pepp                | 48.64    | 1 |

|                                                                                     |          |   |
|-------------------------------------------------------------------------------------|----------|---|
| gb KG9B.104N24F.060120T7 KG9B Nicotiana tabacum cDNA clone KG9B.104N24, n           | 66.58    | 1 |
| gb EST_FLW002xj10f1.ab1 EST_FLW Nicotiana tabacum cDNA, mRNA sequence [EF           | 24.12    | 1 |
| gb KL4B.108H18F.051105T7 KL4B Nicotiana tabacum cDNA clone KL4B.108H18, mF          | 94.73    | 1 |
| tc Rep: Chromosome chr3 scaffold_8, whole genome shotgun sequence - Vitis vinif     | 32.93    | 1 |
| Unknown                                                                             | 40.19    | 1 |
| gb KG9B.103D08F.051128T7 KG9B Nicotiana tabacum cDNA clone KG9B.103D08, n           | 49.8     | 1 |
| gb KL4B.101G02F.051103T7 KL4B Nicotiana tabacum cDNA clone KL4B.101G02, mF          | 36.53    | 1 |
| tc Rep: Mitochondrial F1-ATPase gamma subunit - Ipomoea nil (Japanese morning gl    | 408.29   | 1 |
| Unknown                                                                             | 65.56    | 1 |
| gb FS435586 normalized full-length tobacco cDNA library Nicotiana tabacum cDNA      | 23.83    | 1 |
| gb KR3B.101F03F.051107T7 KR3B Nicotiana tabacum cDNA clone KR3B.101F03, mF          | 79.65    | 1 |
| Unknown                                                                             | 45.48    | 1 |
| gb Nicotiana tabacum S-adenosyl-L-methionine synthetase (SAMS) mRNA, complet        | 3262.46  | 1 |
| gb KP1B.102J04F.050722T7 KP1B Nicotiana tabacum cDNA clone KP1B.102J04, mR          | 28.65    | 1 |
| gb KL5B.118K17F.060217T7 KL5B Nicotiana tabacum cDNA clone KL5B.118K17, mR          | 81.89    | 1 |
| gb AGN_RNC014xk11f1.ab1 AGN_RNC Nicotiana tabacum cDNA 5', mRNA sequenc             | 21.5     | 1 |
| gb TT-40_E03 Burley21 trichome library Nicotiana tabacum cDNA, mRNA sequence        | 35.09    | 1 |
| Unknown                                                                             | 21.12    | 1 |
| gb KT7C.110M10F.051221T7 KT7 Nicotiana tabacum cDNA clone KT7C.110M10, ml           | 1136.67  | 1 |
| gb KT7C.109M07F.051221T7 KT7 Nicotiana tabacum cDNA clone KT7C.109M07, ml           | 209.48   | 1 |
| tc Rep: Chromosome chr6 scaffold_15, whole genome shotgun sequence - Vitis vin      | 917.61   | 1 |
| Unknown                                                                             | 38.77    | 1 |
| Unknown                                                                             | 62.12    | 1 |
| tc Rep: Chromosome chr12 scaffold_36, whole genome shotgun sequence - Vitis vi      | 18.17    | 1 |
| gb AGN_RNC007xc16f1.ab1 AGN_RNC Nicotiana tabacum cDNA 5', mRNA sequenc             | 184.67   | 1 |
| gb TT-38_N12 Burley21 trichome library Nicotiana tabacum cDNA, mRNA sequence        | 476.88   | 1 |
| Unknown                                                                             | 31.69    | 1 |
| Unknown                                                                             | 91.4     | 1 |
| Unknown                                                                             | 15785.45 | 1 |
| gb AGN_ELP005xo16f1.ab1 AGN_ELP Nicotiana tabacum cDNA 5', mRNA sequence            | 29       | 1 |
| Unknown                                                                             | 134.72   | 1 |
| Unknown                                                                             | 27.82    | 1 |
| gb KF8C.103I12F.051214T7 KF8 Nicotiana tabacum cDNA clone KF8C.103I12, mRN/         | 43.45    | 1 |
| tc Rep: Heat shock cognate 70 kDa protein - Petunia hybrida (Petunia), partial (14% | 45.23    | 1 |



|                                                                                      |         |   |
|--------------------------------------------------------------------------------------|---------|---|
| Unknown                                                                              | 19.66   | 1 |
| Unknown                                                                              | 23.73   | 1 |
| Unknown                                                                              | 33.73   | 1 |
| tc Rep: Chromosome chr17 scaffold_12, whole genome shotgun sequence - Vitis vi       | 120.61  | 1 |
| gb KG9B.004G03F.050721T7 KG9B Nicotiana tabacum cDNA clone KG9B.004G03, n            | 399.17  | 1 |
| Unknown                                                                              | 22.83   | 1 |
| tc Rep: Calmodulin-related protein - Arabidopsis thaliana (Mouse-ear cress), partial | 579.44  | 1 |
| tc Rep: 40S ribosomal protein S9 - Catharanthus roseus (Rosy periwinkle) (Madagas    | 99.93   | 1 |
| gb Nicotiana tabacum calcium-dependent protein kinase-like mRNA, partial sequer      | 26.83   | 1 |
| gb KG9B.104F18F.060120T7 KG9B Nicotiana tabacum cDNA clone KG9B.104F18, m            | 77.78   | 1 |
| gb EST_FLW001xc13f1.ab1 EST_FLW Nicotiana tabacum cDNA, mRNA sequence [E             | 1161.86 | 1 |
| gb TT-29_J20 K326 trichome library Nicotiana tabacum cDNA, mRNA sequence [FG         | 121.19  | 1 |
| Unknown                                                                              | 507.15  | 1 |
| tc Rep: Rac-like GTP-binding protein RHO1 precursor - Pisum sativum (Garden pea)     | 1012.65 | 1 |
| gb KL4B.105A08F.051104T7 KL4B Nicotiana tabacum cDNA clone KL4B.105A08, mF           | 623.19  | 1 |
| tc Rep: 40S ribosomal protein S9 - Catharanthus roseus (Rosy periwinkle) (Madagas    | 38.55   | 1 |
| gb AGN_RNC008xp03f1.ab1 AGN_RNC Nicotiana tabacum cDNA 5', mRNA sequenc              | 1178.39 | 1 |
| gb Nicotiana tabacum NtCK2a2 mRNA for casein kinase 2 catalytic subunit, comple      | 87.31   | 1 |
| tc Rep: Chromosome chr8 scaffold_23, whole genome shotgun sequence - Vitis vin       | 28313.6 | 1 |
| Unknown                                                                              | 416.11  | 1 |
| tc Rep: YA4 - Antirrhinum majus (Garden snapdragon), partial (50%) [TC77063]         | 80.32   | 1 |
| tc Rep: Eukaryotic translation initiation factor 4E - Solanum lycopersicum (Tomato)  | 59.14   | 1 |
| Unknown                                                                              | 19.11   | 1 |
| gb KF8C.101B06F.051214T7 KF8 Nicotiana tabacum cDNA clone KF8C.101B06, mRN           | 244.3   | 1 |
| Unknown                                                                              | 93.74   | 1 |
| gb TT-25_N08 Samsun trichome library Nicotiana tabacum cDNA, mRNA sequence           | 27.28   | 1 |
| gb Nicotiana tabacum mRNA for protein kinase 2 (pk2 gene) [AJ608157]                 | 2875.61 | 1 |
| gb CHO_SL023xf22f1.ab1 CHO_SL Nicotiana tabacum cDNA, mRNA sequence [EH6:            | 1074.76 | 1 |
| Unknown                                                                              | 27.19   | 1 |
| Unknown                                                                              | 153.85  | 1 |
| gb CHO_SL007xc15f2.ab1 CHO_SL Nicotiana tabacum cDNA, mRNA sequence [EH6:            | 26.14   | 1 |
| gb KL5B.112P02F.060215T7 KL5B Nicotiana tabacum cDNA clone KL5B.112P02, mR           | 717.6   | 1 |
| gb KT7C.110I19F.051221T7 KT7 Nicotiana tabacum cDNA clone KT7C.110I19, mRN           | 195.55  | 1 |
| Unknown                                                                              | 43.64   | 1 |

|                                                                                      |          |   |
|--------------------------------------------------------------------------------------|----------|---|
| gb Nicotiana tabacum SAICAR synthetase (purC) mRNA, complete cds [AY429423]          | 29.1     | 1 |
| Unknown                                                                              | 649.83   | 1 |
| Unknown                                                                              | 2745.85  | 1 |
| tc Rep: Chromosome chr18 scaffold_1, whole genome shotgun sequence - Vitis vin       | 30.52    | 1 |
| tc Rep: NtK-1-like - Solanum tuberosum (Potato), partial (41%) [TC67891]             | 5759.12  | 1 |
| gb AGN_PNL224af1_a4.trimmed.seq AGN_PNL Nicotiana tabacum cDNA 5', mRNA              | 118.48   | 1 |
| Unknown                                                                              | 3220.19  | 1 |
| gb KL5B.105J24F.060207T7 KL5B Nicotiana tabacum cDNA clone KL5B.105J24, mRN          | 44.75    | 1 |
| Unknown                                                                              | 563.59   | 1 |
| tc Rep: L-aspartate oxidase-like protein - Arabidopsis thaliana (Mouse-ear cress), p | 62.88    | 1 |
| tc Rep: Cytochrome b-c1 complex subunit Rieske-2, mitochondrial precursor - Nico     | 15945.75 | 1 |
| Unknown                                                                              | 60.13    | 1 |
| gb BP534468 MAT005 Nicotiana tabacum cDNA clone BY33047, mRNA sequence [E            | 1282.8   | 1 |
| Unknown                                                                              | 21.39    | 1 |
| gb basic chitinase [Nicotiana tabacum=tobacco, cv Samsun nn, floral bud day 7 exp    | 218.48   | 1 |
| Unknown                                                                              | 54.43    | 1 |
| Unknown                                                                              | 31.68    | 1 |
| tc Rep: Chromosome chr16 scaffold_86, whole genome shotgun sequence - Vitis vi       | 55.73    | 1 |
| tc Rep: Chromosome chr2 scaffold_105, whole genome shotgun sequence - Vitis vi       | 22.16    | 1 |
| tc Rep: 4-coumarate--CoA ligase 1 - Nicotiana tabacum (Common tobacco), partial      | 16.34    | 1 |
| gb Nicotiana tabacum geranylgeranylated protein NTGP2 mRNA, complete cds [U6         | 3136.48  | 1 |
| Unknown                                                                              | 17.15    | 1 |
| Unknown                                                                              | 21.61    | 1 |
| gb N.tabacum mRNA for pyruvate kinase [Z29492]                                       | 580.34   | 1 |
| Unknown                                                                              | 25.08    | 1 |
| gb KT7B.100B14F.051010T7 KT7 Nicotiana tabacum cDNA clone KT7B.100B14, mRN           | 3252.93  | 1 |
| tc Rep: Protein phosphatase inhibitor - Medicago truncatula (Barrel medic), partial  | 27.72    | 1 |
| tc Rep: DEM2 - Solanum lycopersicum (Tomato) (Lycopersicon esculentum), partial      | 46.89    | 1 |
| gb KF8B.202A23F.060124T7 KF8 Nicotiana tabacum cDNA clone KF8B.202A23, mRN           | 5422.48  | 1 |
| gb KF8C.104O14F.051214T7 KF8 Nicotiana tabacum cDNA clone KF8C.104O14, mRN           | 269.06   | 1 |
| gb KR3B.103D10F.051108T7 KR3B Nicotiana tabacum cDNA clone KR3B.103D10, m            | 141.78   | 1 |
| gb KL4B.104G07F.051104T7 KL4B Nicotiana tabacum cDNA clone KL4B.104G07, mF           | 500.54   | 1 |
| gb TOBESTR018E07 TOBEST cDNA library 1 Nicotiana tabacum cDNA 5', mRNA seq           | 30.46    | 1 |
| Unknown                                                                              | 64.44    | 1 |

|                                                                                        |          |   |
|----------------------------------------------------------------------------------------|----------|---|
| gb KP1B.107C03F.050726T7 KP1B Nicotiana tabacum cDNA clone KP1B.107C03, mI             | 140.89   | 1 |
| gb TL13.110I04F.060320T7 TL13 Nicotiana tabacum cDNA clone TL13.110I04, mRN            | 275.36   | 1 |
| gb AGN_RNC116xm16f1.ab1 AGN_RNC Nicotiana tabacum cDNA 5', mRNA sequen                 | 37.56    | 1 |
| Unknown                                                                                | 39.52    | 1 |
| tc Rep: SUI1 protein - Coffea arabica (Coffee), complete [TC50228]                     | 1030.49  | 1 |
| tc Rep: Os03g0719500 protein - Oryza sativa subsp. japonica (Rice), partial (52%) [T   | 27.03    | 1 |
| tc Rep: Chromosome chr17 scaffold_16, whole genome shotgun sequence - Vitis vi         | 222.19   | 1 |
| gb KF8C.106O13F.051215T7 KF8 Nicotiana tabacum cDNA clone KF8C.106O13, mRI             | 90.8     | 1 |
| Unknown                                                                                | 3897.14  | 1 |
| Unknown                                                                                | 420.18   | 1 |
| Unknown                                                                                | 50.49    | 1 |
| Unknown                                                                                | 25.35    | 1 |
| Unknown                                                                                | 127.81   | 1 |
| tc Rep: Deacetylase-like protein - Solanum tuberosum (Potato), partial (68%) [TC44     | 530.37   | 1 |
| gb KF8C.101E14F.051214T7 KF8 Nicotiana tabacum cDNA clone KF8C.101E14, mRN             | 27125.95 | 1 |
| Unknown                                                                                | 48353.8  | 1 |
| gb KP1B.104P01F.050725T7 KP1B Nicotiana tabacum cDNA clone KP1B.104P01, mI             | 29.09    | 1 |
| Unknown                                                                                | 25.73    | 1 |
| tc Rep: MRNA, , clone: RAFL25-03-N20 - Arabidopsis thaliana (Mouse-ear cress), pa      | 258.52   | 1 |
| tc Rep: Polyubiquitin - Fragaria ananassa (Strawberry), partial (60%) [TC50969]        | 3087.15  | 1 |
| tc Rep: Granule-bound starch synthase 1, chloroplast precursor - Solanum tuberosu      | 137.08   | 1 |
| gb N.tabacum mRNA for caffeoyl-CoA O-methyltransferase [Z56282]                        | 255.44   | 1 |
| Unknown                                                                                | 71.98    | 1 |
| gb Nicotiana tabacum cDNA-AFLP-fragment BSTT4-24-270, cultivar Bright Yellow 2         | 1876.28  | 1 |
| gb 20.2H05 Transformed tobacco Lambda Zap II library Nicotiana tabacum cDNA 5'         | 68.43    | 1 |
| Unknown                                                                                | 5600.42  | 1 |
| Unknown                                                                                | 86.6     | 1 |
| Unknown                                                                                | 530.68   | 1 |
| gb KF8C.104K05F.051214T7 KF8 Nicotiana tabacum cDNA clone KF8C.104K05, mRN             | 27.35    | 1 |
| gb KL4B.101E04F.051103T7 KL4B Nicotiana tabacum cDNA clone KL4B.101E04, mR             | 88.05    | 1 |
| tc Rep: Chromosome chr14 scaffold_27, whole genome shotgun sequence - Vitis vi         | 85.67    | 1 |
| tc Rep: Chromosome chr1 scaffold_75, whole genome shotgun sequence - Vitis vin         | 247.26   | 1 |
| tc Rep: Glycylpeptide N-tetradecanoyltransferase - Vitis vinifera (Grape), partial (93 | 1095.69  | 1 |
| Unknown                                                                                | 174.36   | 1 |

|                                                                                       |         |   |
|---------------------------------------------------------------------------------------|---------|---|
| gb CHO_SL023xf22f1.ab1 CHO_SL Nicotiana tabacum cDNA, mRNA sequence [EH6:             | 882.74  | 1 |
| tc Rep: Predicted protein - Physcomitrella patens subsp. patens, partial (86%) [TC6:  | 100.69  | 1 |
| tc Rep: Translationally-controlled tumor protein homolog - Nicotiana tabacum (Cor     | 19469.9 | 1 |
| tc Rep: Lecithine cholesterol acyltransferase-like protein - Medicago truncatula (Ba  | 7433.61 | 1 |
| tc Rep: Heat shock protein 82 - Nicotiana tabacum (Common tobacco), partial (19%      | 346.3   | 1 |
| Unknown                                                                               | 3760.65 | 1 |
| gb Nicotiana tabacum cDNA-AFLP fragment H-N_BT3M14-319 sequence [DQ46019              | 21.56   | 1 |
| Unknown                                                                               | 27.13   | 1 |
| gb KP1B.001O09F.050628T7 KP1B Nicotiana tabacum cDNA clone KP1B.001O09, m             | 27.47   | 1 |
| gb AGN_RNC004xe11f1.ab1 AGN_RNC Nicotiana tabacum cDNA 5', mRNA sequenc               | 220.6   | 1 |
| tc Rep: Ubiquitin carboxyl-terminal hydrolase - Vitis vinifera (Grape), partial (18%) | 293.69  | 1 |
| gb TT-22_M06 Burley21 trichome library Nicotiana tabacum cDNA, mRNA sequenc           | 451.09  | 1 |
| tc Rep: Chromosome chr1 scaffold_135, whole genome shotgun sequence - Vitis vi        | 89.56   | 1 |
| gb AGN_PNL223df1_b2.trimmed.seq AGN_PNL Nicotiana tabacum cDNA 5', mRNA               | 107.03  | 1 |
| tc Rep: Chromosome chr8 scaffold_23, whole genome shotgun sequence - Vitis vin        | 110.09  | 1 |
| gb KN6B.105G11F.060104T7 KN6B Nicotiana tabacum cDNA clone KN6B.105G11, r             | 239.97  | 1 |
| gb KN6B.009B01F.050901T7 KN6B Nicotiana tabacum cDNA clone KN6B.009B01, r             | 459.9   | 1 |
| Unknown                                                                               | 97.29   | 1 |
| gb KL4B.103I17F.051103T7 KL4B Nicotiana tabacum cDNA clone KL4B.103I17, mRN           | 2757.01 | 1 |
| gb CHO_SL014xn09f1.ab1 CHO_SL Nicotiana tabacum cDNA, mRNA sequence [EH6              | 49.21   | 1 |
| gb KG9B.105I02F.051128T7 KG9B Nicotiana tabacum cDNA clone KG9B.105I02, mR            | 193.21  | 1 |
| gb KG9B.102M10F.051126T7 KG9B Nicotiana tabacum cDNA clone KG9B.102M10,               | 1152.34 | 1 |
| gb KL4B.103B21F.051103T7 KL4B Nicotiana tabacum cDNA clone KL4B.103B21, mR            | 951.23  | 1 |
| gb Nicotiana tabacum mRNA for peroxidase, complete cds, clone:NTPXC7.5 [AB044         | 24.63   | 1 |
| tc Rep: NADH-ubiquinone oxidoreductase chain 1 - Naegleria gruberi, partial (6%) [    | 61.81   | 1 |
| gb BP533599 MAT005 Nicotiana tabacum cDNA clone BY30291, mRNA sequence [E             | 19.45   | 1 |
| tc Rep: Inositol-3-phosphate synthase - Nicotiana tabacum (Common tobacco), par       | 3264.47 | 1 |
| tc Rep: Chromosome chr19 scaffold_66, whole genome shotgun sequence - Vitis vi        | 257.44  | 1 |
| gb TT-19_O08 K326 early senescent leaf library Nicotiana tabacum cDNA, mRNA se        | 202.99  | 1 |
| tc Rep: Elicitor-inducible cytochrome P450 - Nicotiana tabacum (Common tobacco)       | 32.53   | 1 |
| gb KG9B.104B19F.060120T7 KG9B Nicotiana tabacum cDNA clone KG9B.104B19, r             | 17.23   | 1 |
| tc Rep: Ribosomal protein L9 - Bigeloviella natans (Pedinomonas minutissima) (Chl     | 52.11   | 1 |
| Unknown                                                                               | 31.52   | 1 |
| tc Rep: Sensor protein - Ralstonia eutropha (strain ATCC 17699 / H16 / DSM 428 / S    | 176.32  | 1 |

|                                                                                      |         |   |
|--------------------------------------------------------------------------------------|---------|---|
| tc Rep: Chromosome undetermined scaffold_252, whole genome shotgun sequenc           | 19090.5 | 1 |
| tc Rep: Predicted protein - Physcomitrella patens subsp. patens, partial (82%) [TC4: | 237     | 1 |
| gb Nicotiana tabacum cDNA-AFLP-fragment BSTT21-1-268, cultivar Bright Yellow 2       | 192.66  | 1 |
| Unknown                                                                              | 54.68   | 1 |
| Unknown                                                                              | 2065.87 | 1 |
| gb KG9B.002N08F.050720T7 KG9B Nicotiana tabacum cDNA clone KG9B.002N08, n            | 136.51  | 1 |
| tc Rep: Cytochrome c - Oryza sativa subsp. indica (Rice), complete [TC58147]         | 60.93   | 1 |
| Unknown                                                                              | 661.64  | 1 |
| Unknown                                                                              | 26.47   | 1 |
| tc Rep: Chromosome chr12 scaffold_18, whole genome shotgun sequence - Vitis vi       | 86.47   | 1 |
| gb KN6B.009K14F.050901T7 KN6B Nicotiana tabacum cDNA clone KN6B.009K14, r            | 2291.34 | 1 |
| gb AGN_RPC014xi23f1.ab1 AGN_RPC Nicotiana tabacum cDNA 5', mRNA sequence             | 100.09  | 1 |
| Unknown                                                                              | 377.32  | 1 |
| tc Rep: Chromosome undetermined scaffold_466, whole genome shotgun sequenc           | 517.12  | 1 |
| tc Rep: Chromosome chr1 scaffold_75, whole genome shotgun sequence - Vitis vin       | 479     | 1 |
| gb N.tabacum SUT1a mRNA for sucrose transporter [X82276]                             | 41.5    | 1 |
| Unknown                                                                              | 104.77  | 1 |
| gb FS415057 normalized full-length tobacco cDNA library Nicotiana tabacum cDNA       | 248.32  | 1 |
| gb KT7C.102F03F.051216T7 KT7 Nicotiana tabacum cDNA clone KT7C.102F03, mRN           | 93.19   | 1 |
| tc Rep: Heat stress transcription factor B-2a - Arabidopsis thaliana (Mouse-ear cres | 124.38  | 1 |
| Unknown                                                                              | 144.35  | 1 |
| tc Rep: Os05g0119300 protein - Oryza sativa subsp. japonica (Rice), partial (61%) [T | 4649.29 | 1 |
| tc Rep: Erwinia induced protein 2 - Solanum tuberosum (Potato), complete [TC5658     | 1534.08 | 1 |
| gb KG9B.103K24F.051128T7 KG9B Nicotiana tabacum cDNA clone KG9B.103K24, m            | 508.28  | 1 |
| tc Rep: Salt-induced AAA-Type ATPase - Mesembryanthemum crystallinum (Comm           | 249.75  | 1 |
| gb KL4B.106B16F.051125T7 KL4B Nicotiana tabacum cDNA clone KL4B.106B16, mR           | 94.28   | 1 |
| Unknown                                                                              | 23.08   | 1 |
| gb KL5B.116A22F.060217T7 KL5B Nicotiana tabacum cDNA clone KL5B.116A22, mF           | 32.51   | 1 |
| tc Rep: Chromosome chr19 scaffold_4, whole genome shotgun sequence - Vitis vin       | 185.37  | 1 |
| tc Rep: At4g27040 - Arabidopsis thaliana (Mouse-ear cress), complete [TC56578]       | 90.77   | 1 |
| Unknown                                                                              | 117.15  | 1 |
| gb AGN_RPC004xo04f1.ab1 AGN_RPC Nicotiana tabacum cDNA 5', mRNA sequenc              | 91.29   | 1 |
| tc Rep: 6-phosphogluconolactonase - Oryza brachyantha, partial (82%) [TC41006]       | 35.34   | 1 |
| gb KL4B.102P19F.051125T7 KL4B Nicotiana tabacum cDNA clone KL4B.102P19, mR           | 21.2    | 1 |

|                                                                                             |         |   |
|---------------------------------------------------------------------------------------------|---------|---|
| Unknown                                                                                     | 29.64   | 1 |
| tc Rep: Ribosomal protein L41 - <i>Candida maltosa</i> (Yeast), complete [TC60925]          | 38.69   | 1 |
| tc Rep: Carbonic anhydrase, chloroplast precursor - <i>Nicotiana tabacum</i> (Common t      | 428.45  | 1 |
| gb TL13.105J04F.060313T7 TL13 <i>Nicotiana tabacum</i> cDNA clone TL13.105J04, mRN          | 187.9   | 1 |
| Unknown                                                                                     | 8301.91 | 1 |
| Unknown                                                                                     | 3979.22 | 1 |
| gb KL4B.100B12F.050922T7 KL4B <i>Nicotiana tabacum</i> cDNA clone KL4B.100B12, mR           | 756.17  | 1 |
| tc Rep: Chromosome chr14 scaffold_27, whole genome shotgun sequence - <i>Vitis vi</i>       | 2121.46 | 1 |
| gb KL5B.115I05F.060302T7 KL5B <i>Nicotiana tabacum</i> cDNA clone KL5B.115I05, mRN          | 7631.19 | 1 |
| gb KT7C.104L17F.051219T7 KT7 <i>Nicotiana tabacum</i> cDNA clone KT7C.104L17, mRN           | 722.26  | 1 |
| gb  <i>Nicotiana tabacum</i> small ras-related protein (Ran-B1) mRNA, complete cds [L16     | 822.88  | 1 |
| Unknown                                                                                     | 25.06   | 1 |
| gb AGN_RNC001xf09f1.ab1 AGN_RNC <i>Nicotiana tabacum</i> cDNA 5', mRNA sequenci             | 220.39  | 1 |
| gb CHO_SL013xd09f1.ab1 CHO_SL <i>Nicotiana tabacum</i> cDNA, mRNA sequence [EH6             | 84.09   | 1 |
| tc Rep: Chromosome chr11 scaffold_13, whole genome shotgun sequence - <i>Vitis vi</i>       | 19.69   | 1 |
| gb BP131286 MAT001 <i>Nicotiana tabacum</i> cDNA clone BY3322, mRNA sequence [BF            | 472.56  | 1 |
| gb AGN_RNC111xc18r1.ab1 AGN_RNC <i>Nicotiana tabacum</i> cDNA 3', mRNA sequenc              | 22.3    | 1 |
| tc Rep: Chromosome chr17 scaffold_12, whole genome shotgun sequence - <i>Vitis vi</i>       | 195.64  | 1 |
| gb AGN_ELP014xc17f1.ab1 AGN_ELP <i>Nicotiana tabacum</i> cDNA 5', mRNA sequence             | 49.56   | 1 |
| Unknown                                                                                     | 32.59   | 1 |
| Unknown                                                                                     | 99.96   | 1 |
| Unknown                                                                                     | 1053.08 | 1 |
| tc Rep: Chromosome chr5 scaffold_2, whole genome shotgun sequence - <i>Vitis vinif</i>      | 93.22   | 1 |
| gb  <i>Nicotiana tabacum</i> mRNA for calmodulin NtCaM7, complete cds [AB050843]            | 1694.48 | 1 |
| Unknown                                                                                     | 266.76  | 1 |
| tc Rep: Eukaryotic translation initiation factor 5A-1/2 - <i>Solanum tuberosum</i> (Potatc  | 1139.55 | 1 |
| gb KL4B.104K08F.051104T7 KL4B <i>Nicotiana tabacum</i> cDNA clone KL4B.104K08, mR           | 1128.47 | 1 |
| tc Rep: Potyvirus VPg interacting protein - <i>Nicotiana benthamiana</i> , partial (43%) [T | 724.39  | 1 |
| tc Rep: Proteasome subunit beta type-6 precursor - <i>Nicotiana tabacum</i> (Common t       | 516.33  | 1 |
| gb  <i>Nicotiana tabacum</i> SR1 Nt-rab7c mRNA, complete cds [L29276]                       | 113.99  | 1 |
| gb AGN_PNL222ar1_c5.trimmed.seq AGN_PNL <i>Nicotiana tabacum</i> cDNA 3', mRNA              | 94.82   | 1 |
| tc Rep: Chemokine receptor 4 - <i>Hydromantes italicus</i> (Italian cave salamander), par   | 165.68  | 1 |
| tc Rep: Chromosome chr7 scaffold_44, whole genome shotgun sequence - <i>Vitis vin</i>       | 136.56  | 1 |
| tc Rep: SPFH domain / Band 7 family protein - <i>Solanum demissum</i> (Wild potato), pa     | 3940.94 | 1 |

|                                                                                      |         |   |
|--------------------------------------------------------------------------------------|---------|---|
| gb CHO_SL007xk19f2.ab1 CHO_SL Nicotiana tabacum cDNA, mRNA sequence [EH6             | 741.51  | 1 |
| gb KN6B.101I21F.051230T7 KN6B Nicotiana tabacum cDNA clone KN6B.101I21, mF           | 40.72   | 1 |
| Unknown                                                                              | 20.43   | 1 |
| tc Rep: 40S ribosomal protein S9 - Catharanthus roseus (Rosy periwinkle) (Madagas    | 127.52  | 1 |
| Unknown                                                                              | 23.29   | 1 |
| gb CHO_SL024xb11f1.ab1 CHO_SL Nicotiana tabacum cDNA, mRNA sequence [EH6             | 39.16   | 1 |
| Unknown                                                                              | 24.33   | 1 |
| Unknown                                                                              | 2170.52 | 1 |
| gb KP1B.111F04F.060116T7 KP1B Nicotiana tabacum cDNA clone KP1B.111F04, mF           | 453.43  | 1 |
| gb BP534671 MAT005 Nicotiana tabacum cDNA clone BY33256, mRNA sequence [E            | 8873.03 | 1 |
| Unknown                                                                              | 49.05   | 1 |
| gb KG9B.102G11F.051126T7 KG9B Nicotiana tabacum cDNA clone KG9B.102G11, n            | 104.81  | 1 |
| Unknown                                                                              | 111.9   | 1 |
| gb KG9B.106L19F.051129T7 KG9B Nicotiana tabacum cDNA clone KG9B.106L19, m            | 144.4   | 1 |
| Unknown                                                                              | 152.83  | 1 |
| Unknown                                                                              | 25.91   | 1 |
| tc Rep: Chromosome chr18 scaffold_1, whole genome shotgun sequence - Vitis vin       | 730.19  | 1 |
| tc Rep: Nuclear transport factor 2 - Arabidopsis thaliana (Mouse-ear cress), partial | 693.5   | 1 |
| gb TL13.101P16F.060313T7 TL13 Nicotiana tabacum cDNA clone TL13.101P16, mRI          | 51.41   | 1 |
| tc Rep: Arabinogalactan-protein precursor - Nicotiana alata (Winged tobacco) (Pers   | 32.71   | 1 |
| gb AGN_RNC104xf12f1.ab1 AGN_RNC Nicotiana tabacum cDNA 5', mRNA sequenc              | 58.06   | 1 |
| tc Rep: Non-cell-autonomous heat shock cognate protein 70 - Cucurbita maxima (P      | 7860.26 | 1 |
| gb Nicotiana tabacum NT3 mRNA, complete cds [AF124369]                               | 305.87  | 1 |
| tc Rep: Chromosome chr15 scaffold_37, whole genome shotgun sequence - Vitis vi       | 25.25   | 1 |
| gb KP1B.104I19F.050725T7 KP1B Nicotiana tabacum cDNA clone KP1B.104I19, mRI          | 212.76  | 1 |
| Unknown                                                                              | 52.53   | 1 |
| gb Nicotiana tabacum CaMB-channel protein mRNA, complete cds [U65390]                | 137.64  | 1 |
| gb KG9B.106E06F.051129T7 KG9B Nicotiana tabacum cDNA clone KG9B.106E06, m            | 13354.8 | 1 |
| gb KL4B.102L09F.051125T7 KL4B Nicotiana tabacum cDNA clone KL4B.102L09, mRI          | 1193.53 | 1 |
| Unknown                                                                              | 32.09   | 1 |
| tc Rep: Chromosome chr12 scaffold_18, whole genome shotgun sequence - Vitis vi       | 19.08   | 1 |
| gb Nicotiana tabacum phospholipase C2 mRNA, complete cds [AF223573]                  | 64.58   | 1 |
| Unknown                                                                              | 213.48  | 1 |
| Unknown                                                                              | 183.29  | 1 |

|                                                                                         |          |   |
|-----------------------------------------------------------------------------------------|----------|---|
| gb KG9B.001G16F.050628T7 KG9B Nicotiana tabacum cDNA clone KG9B.001G16, n               | 508.73   | 1 |
| gb TT-03_E05 K326 early senescent leaf library Nicotiana tabacum cDNA, mRNA se          | 7691.17  | 1 |
| tc Rep: Chromosome chr1 scaffold_136, whole genome shotgun sequence - Vitis vi          | 310.92   | 1 |
| tc Rep: RAD23-like - Solanum tuberosum (Potato), complete [TC48167]                     | 44.83    | 1 |
| gb Nicotiana tabacum mRNA for sulfite reductase, complete cds [D83583]                  | 3216.16  | 1 |
| gb AGN_RNC015xl13f1.ab1 AGN_RNC Nicotiana tabacum cDNA 5', mRNA sequenc                 | 93.71    | 1 |
| gb AM820007 seedling library, SL Nicotiana tabacum cDNA clone nt002065007, mR           | 95.53    | 1 |
| gb N.tabacum mRNA ap24 [X65700]                                                         | 29.5     | 1 |
| Unknown                                                                                 | 199.08   | 1 |
| tc Rep: Chromosome undetermined scaffold_129, whole genome shotgun sequenc              | 1662.44  | 1 |
| gb AM786095 DL, diurnal library Nicotiana tabacum cDNA clone nt005209016, mRI           | 50.46    | 1 |
| gb AGN_PNL221dr1_a10.trimmed.seq AGN_PNL Nicotiana tabacum cDNA 3', mRN.                | 38.02    | 1 |
| Unknown                                                                                 | 72.77    | 1 |
| tc Rep: Chromosome chr4 scaffold_83, whole genome shotgun sequence - Vitis vin          | 51.99    | 1 |
| tc Rep: Proteasome subunit beta type-1 - Petunia hybrida (Petunia), complete [TC4       | 52.56    | 1 |
| gb TT-21_C04 K326 late senescent leaf library Nicotiana tabacum cDNA, mRNA seq          | 25.72    | 1 |
| gb KL4B.104P10F.051104T7 KL4B Nicotiana tabacum cDNA clone KL4B.104P10, mR              | 55.18    | 1 |
| tc Rep: Ubiquitin carboxyl-terminal hydrolase - Vitis vinifera (Grape), partial (6%) [T | 113.14   | 1 |
| gb KT7C.108N20F.051219T7 KT7 Nicotiana tabacum cDNA clone KT7C.108N20, mR               | 522.97   | 1 |
| gb KL4B.104J01F.051104T7 KL4B Nicotiana tabacum cDNA clone KL4B.104J01, mRN             | 189.41   | 1 |
| gb CHO_SL008xj22f1.ab1 CHO_SL Nicotiana tabacum cDNA, mRNA sequence [EH62               | 1174.55  | 1 |
| gb AGN_ELP008xl06f1.ab1 AGN_ELP Nicotiana tabacum cDNA 5', mRNA sequence                | 104.1    | 1 |
| Unknown                                                                                 | 63.56    | 1 |
| Unknown                                                                                 | 61.57    | 1 |
| tc Rep: Chromosome chr12 scaffold_36, whole genome shotgun sequence - Vitis vi          | 272.22   | 1 |
| gb KG9B.102M06F.051126T7 KG9B Nicotiana tabacum cDNA clone KG9B.102M06,                 | 37.2     | 1 |
| Unknown                                                                                 | 36.87    | 1 |
| gb KP1B.105L07F.060116T7 KP1B Nicotiana tabacum cDNA clone KP1B.105L07, mR              | 509.6    | 1 |
| Unknown                                                                                 | 96.28    | 1 |
| gb AM827414 DL, diurnal library Nicotiana tabacum cDNA clone nt005243064, mRI           | 31.54    | 1 |
| gb TT-49_O20 K326 late senescent leaf library Nicotiana tabacum cDNA, mRNA seq          | 5970.83  | 1 |
| gb KT7B.107O10F.060124T7 KT7 Nicotiana tabacum cDNA clone KT7B.107O10, mR               | 275.12   | 1 |
| gb KT7C.109D22F.051221T7 KT7 Nicotiana tabacum cDNA clone KT7C.109D22, mRI              | 87.74    | 1 |
| tc Rep: S-adenosylmethionine decarboxylase proenzyme (AdoMetDC) (SamDC) [Cc             | 10290.05 | 1 |



|                                                                                                                 |         |   |
|-----------------------------------------------------------------------------------------------------------------|---------|---|
| tc Rep: Adenylate kinase A - <i>Oryza sativa</i> subsp. <i>japonica</i> (Rice), complete [TC42196]              | 56.83   | 1 |
| gb AGN_RNC026xj22f1.ab1 AGN_RNC <i>Nicotiana tabacum</i> cDNA 5', mRNA sequence [E026xj22f1]                    | 187.97  | 1 |
| tc Rep: Malate dehydrogenase - <i>Solanum tuberosum</i> (Potato), partial (62%) [TC454]                         | 744.69  | 1 |
| gb BP526819 MAT001 <i>Nicotiana tabacum</i> cDNA clone BY11566, mRNA sequence [E026xj22f1]                      | 18.26   | 1 |
| tc Rep: Chromosome chr2 scaffold_132, whole genome shotgun sequence - <i>Vitis vinifera</i>                     | 2919.91 | 1 |
| tc Rep: Chromosome undetermined scaffold_30, whole genome shotgun sequence                                      | 470.69  | 1 |
| tc Rep: Os01g0332900 protein - <i>Oryza sativa</i> subsp. <i>japonica</i> (Rice), partial (45%) [T0332900]      | 54.16   | 1 |
| tc Rep: Chromosome chr1 scaffold_84, whole genome shotgun sequence - <i>Vitis vinifera</i>                      | 495.99  | 1 |
| Unknown                                                                                                         | 231.28  | 1 |
| gb  <i>Nicotiana tabacum</i> JEI1 mRNA for hypothetical protein, complete cds [AB300771]                        | 55.17   | 1 |
| tc Rep: RNA-binding protein precursor - <i>Nicotiana tabacum</i> (Common tobacco), complete cds                 | 22.09   | 1 |
| Unknown                                                                                                         | 65.26   | 1 |
| tc Rep: C-type cytochrome biogenesis protein - <i>Glycine max</i> (Soybean), partial (75%) [E026xj22f1]         | 23.3    | 1 |
| gb BP132437 MAT001 <i>Nicotiana tabacum</i> cDNA clone BY4605, mRNA sequence [BF026xj22f1]                      | 92.75   | 1 |
| tc Rep: Chromosome chr18 scaffold_59, whole genome shotgun sequence - <i>Vitis vinifera</i>                     | 1114.22 | 1 |
| gb KR3B.110D19F.051111T7 KR3B <i>Nicotiana tabacum</i> cDNA clone KR3B.110D19, mRNA sequence [E026xj22f1]       | 32.6    | 1 |
| Unknown                                                                                                         | 1173.03 | 1 |
| tc Rep: Chromosome chr8 scaffold_34, whole genome shotgun sequence - <i>Vitis vinifera</i>                      | 58.44   | 1 |
| tc Rep: 3-hydroxy-3-methylglutaryl coenzyme A synthase - <i>Solanum lycopersicum</i> (Tomato)                   | 979.8   | 1 |
| Unknown                                                                                                         | 95.87   | 1 |
| gb  <i>Nicotiana tabacum</i> mRNA for bromodomain-containing RNA-binding protein 1 (BRP1)                       | 1275.09 | 1 |
| tc Rep: Uncharacterized 12.4 kDa protein in 33 kDa protein region - Human adenovirus 5                          | 41.19   | 1 |
| tc Rep: Chromosome chr5 scaffold_2, whole genome shotgun sequence - <i>Vitis vinifera</i>                       | 435.17  | 1 |
| tc Rep: HrpN-interacting protein from <i>Malus</i> - <i>Malus domestica</i> (Apple) ( <i>Malus sylvestris</i> ) | 17.28   | 1 |
| tc Rep: ER6 protein - <i>Solanum lycopersicum</i> (Tomato) ( <i>Lycopersicon esculentum</i> ), complete cds     | 192.39  | 1 |
| tc Rep: Chromosome chr6 scaffold_3, whole genome shotgun sequence - <i>Vitis vinifera</i>                       | 401.29  | 1 |
| Unknown                                                                                                         | 988.72  | 1 |
| gb AGN_RNC012xc03f1.ab1 AGN_RNC <i>Nicotiana tabacum</i> cDNA 5', mRNA sequence [E026xj22f1]                    | 59.46   | 1 |
| Unknown                                                                                                         | 22.42   | 1 |
| gb KG9B.005A12F.050721T7 KG9B <i>Nicotiana tabacum</i> cDNA clone KG9B.005A12, mRNA sequence [E026xj22f1]       | 212.08  | 1 |
| gb BP526949 MAT001 <i>Nicotiana tabacum</i> cDNA clone BY11708, mRNA sequence [E026xj22f1]                      | 44.76   | 1 |
| tc Rep: Granule-bound starch synthase 1, chloroplast precursor - <i>Solanum tuberosum</i>                       | 384.45  | 1 |
| tc Rep: ATP-dependent Clp protease proteolytic subunit - <i>Fritillaria agrestis</i> (Stinkbug)                 | 84.65   | 1 |
| tc Rep: Chromosome chr12 scaffold_36, whole genome shotgun sequence - <i>Vitis vinifera</i>                     | 91.51   | 1 |

|                                                                                    |         |   |
|------------------------------------------------------------------------------------|---------|---|
| tc Rep: Chromosome chr14 scaffold_9, whole genome shotgun sequence - Vitis vin     | 983.35  | 1 |
| gb 18.2A08 Transformed tobacco Lambda Zap II library Nicotiana tabacum cDNA 5'     | 29.44   | 1 |
| tc Rep: 40S ribosomal protein S25 - Solanum lycopersicum (Tomato) (Lycopersicon    | 184.55  | 1 |
| tc Rep: Chromosome chr5 scaffold_2, whole genome shotgun sequence - Vitis vinif    | 406.61  | 1 |
| tc Rep: Phosphoglucomutase, cytoplasmic - Solanum tuberosum (Potato), partial (4   | 104.71  | 1 |
| Unknown                                                                            | 107.81  | 1 |
| Unknown                                                                            | 697.16  | 1 |
| tc Rep: Arabidopsis thaliana genomic DNA, chromosome 3, TAC clone: K10D20 - Ar     | 82.56   | 1 |
| gb KN6B.103M17F.060103T7 KN6B Nicotiana tabacum cDNA clone KN6B.103M17,            | 18.12   | 1 |
| gb AM789623 seedling library, SL Nicotiana tabacum cDNA clone nt002159082, mF      | 523     | 1 |
| tc Rep: Mitochondrial processing peptidase - Solanum tuberosum (Potato), partial ( | 1102.38 | 1 |
| Unknown                                                                            | 58.28   | 1 |
| tc Rep: Chromosome chr17 scaffold_12, whole genome shotgun sequence - Vitis vi     | 24.33   | 1 |
| tc Rep: Chromosome chr18 scaffold_1, whole genome shotgun sequence - Vitis vin     | 131.5   | 1 |
| gb BP525818 MAT001 Nicotiana tabacum cDNA clone BY10512, mRNA sequence [E          | 104.13  | 1 |
| Unknown                                                                            | 123.83  | 1 |
| gb Nicotiana tabacum DnaJ-like protein mRNA, complete cds [AF191497]               | 236.42  | 1 |
| gb AGN_ELP011xp07f1.ab1 AGN_ELP Nicotiana tabacum cDNA 5', mRNA sequence           | 538.06  | 1 |
| gb KL5B.106L07F.060215T7 KL5B Nicotiana tabacum cDNA clone KL5B.106L07, mR         | 59.4    | 1 |
| Unknown                                                                            | 23.4    | 1 |
| gb AGN_RPC005xg20f1.ab1 AGN_RPC Nicotiana tabacum cDNA 5', mRNA sequence           | 145.65  | 1 |
| tc Rep: Chromosome chr7 scaffold_44, whole genome shotgun sequence - Vitis vin     | 156.98  | 1 |
| tc Rep: Chromosome chr7 scaffold_42, whole genome shotgun sequence - Vitis vin     | 151.72  | 1 |
| Unknown                                                                            | 532.88  | 1 |
| gb Nicotiana tabacum arm repeat-containing protein mRNA, complete cds [AY2192      | 115.35  | 1 |
| gb Nicotiana tabacum cinnamyl alcohol dehydrogenase 1 (CAD1-1) mRNA, complet       | 17.44   | 1 |
| tc Rep: Drm3-like protein - Solanum tuberosum (Potato), partial (88%) [TC52491]    | 42.93   | 1 |
| gb KG9B.005F09F.050721T7 KG9B Nicotiana tabacum cDNA clone KG9B.005F09, m          | 754.71  | 1 |
| gb KP1B.105G14F.060116T7 KP1B Nicotiana tabacum cDNA clone KP1B.105G14, m          | 86.38   | 1 |
| gb TT-29_E24 tobacco leaf library Nicotiana tabacum cDNA, mRNA sequence [FG63      | 370.8   | 1 |
| tc Rep: Chromosome chr2 scaffold_105, whole genome shotgun sequence - Vitis vi     | 562.3   | 1 |
| gb KN6B.100K06F.051019T7 KN6B Nicotiana tabacum cDNA clone KN6B.100K06, m          | 28.75   | 1 |
| gb TT-10_L06 K326 early senescent leaf library Nicotiana tabacum cDNA, mRNA sec    | 19.71   | 1 |
| gb KF8C.106B20F.051215T7 KF8 Nicotiana tabacum cDNA clone KF8C.106B20, mRN         | 19.56   | 1 |

|                                                                                     |         |   |
|-------------------------------------------------------------------------------------|---------|---|
| gb KP1B.105P05F.060116T7 KP1B Nicotiana tabacum cDNA clone KP1B.105P05, m           | 726.09  | 1 |
| gb CHO_SL005xe14f1.ab1 CHO_SL Nicotiana tabacum cDNA, mRNA sequence [EH6            | 17.65   | 1 |
| Unknown                                                                             | 240.24  | 1 |
| tc Rep: Chromosome chr11 scaffold_56, whole genome shotgun sequence - Vitis vi      | 803.43  | 1 |
| tc Rep: Rar1 - Nicotiana tabacum (Common tobacco), complete [TC40955]               | 25.14   | 1 |
| gb KL4B.104P21F.051104T7 KL4B Nicotiana tabacum cDNA clone KL4B.104P21, mR          | 251.57  | 1 |
| Unknown                                                                             | 610.01  | 1 |
| gb KG9B.004F01F.050721T7 KG9B Nicotiana tabacum cDNA clone KG9B.004F01, m           | 25.72   | 1 |
| tc Rep: Chromosome chr8 scaffold_88, whole genome shotgun sequence - Vitis vin      | 4181.15 | 1 |
| tc Rep: Fasciclin-like arabinogalactan protein 3 - Gossypium hirsutum (Upland cottc | 52.34   | 1 |
| tc Rep: Chromosome chr14 scaffold_27, whole genome shotgun sequence - Vitis vi      | 107.03  | 1 |
| tc Rep: NADH glutamate synthase precursor - Phaseolus vulgaris (Kidney bean) (Fre   | 30.3    | 1 |
| Unknown                                                                             | 22.64   | 1 |
| gb AGN_PNL214ar1_d9.trimmed.seq AGN_PNL Nicotiana tabacum cDNA 3', mRNA             | 108.81  | 1 |
| gb CHO_SL009xh09f1.ab1 CHO_SL Nicotiana tabacum cDNA, mRNA sequence [EH6            | 59.58   | 1 |
| gb Nicotiana tabacum partial mRNA for serine acetyltransferase 4 (sat4 gene) [AJ4:  | 210.54  | 1 |
| Unknown                                                                             | 1743.2  | 1 |
| tc Rep: Chromosome chr4 scaffold_6, whole genome shotgun sequence - Vitis vinif     | 1869.62 | 1 |
| tc Rep: Chromosome chr5 scaffold_2, whole genome shotgun sequence - Vitis vinif     | 536.45  | 1 |
| Unknown                                                                             | 25.94   | 1 |
| gb KR3B.103A01F.051108T7 KR3B Nicotiana tabacum cDNA clone KR3B.103A01, m           | 89.25   | 1 |
| gb KG9B.002C03F.050720T7 KG9B Nicotiana tabacum cDNA clone KG9B.002C03, r           | 467.63  | 1 |
| gb TT-49_L09 K326 late senescent leaf library Nicotiana tabacum cDNA, mRNA seq      | 32.69   | 1 |
| tc Rep: Chromosome undetermined scaffold_91, whole genome shotgun sequence          | 481.74  | 1 |
| gb KG9B.003N16F.050720T7 KG9B Nicotiana tabacum cDNA clone KG9B.003N16, n           | 105.8   | 1 |
| gb AGN_PNL230bf1_e6.trimmed.seq AGN_PNL Nicotiana tabacum cDNA 5', mRNA             | 4532.15 | 1 |
| tc Rep: Protein kinase - Carica papaya (Papaya), partial (11%) [TC66002]            | 100.25  | 1 |
| tc Rep: Nucleic acid binding protein - Nicotiana tabacum (Common tobacco), partia   | 1814.82 | 1 |
| gb AM808565 seedling library, SL Nicotiana tabacum cDNA clone nt002221007, mR       | 60.52   | 1 |
| gb AGN_RNC025xm06f1.ab1 AGN_RNC Nicotiana tabacum cDNA 5', mRNA sequen              | 27.26   | 1 |
| tc Rep: 40S ribosomal protein S24 - Vitis vinifera (Grape), partial (96%) [TC54072] | 70.25   | 1 |
| Unknown                                                                             | 242.66  | 1 |
| tc Rep: Cytochrome c oxidase subunit Vb - Pisum sativum (Garden pea), partial (68:  | 18.86   | 1 |
| Unknown                                                                             | 356.31  | 1 |

|                                                                                       |          |   |
|---------------------------------------------------------------------------------------|----------|---|
| gb KF8C.109P17F.051215T7 KF8 Nicotiana tabacum cDNA clone KF8C.109P17, mRNA           | 30.34    | 1 |
| Unknown                                                                               | 60.62    | 1 |
| gb KL5B.113A20F.060217T7 KL5B Nicotiana tabacum cDNA clone KL5B.113A20, mRNA          | 32.93    | 1 |
| tc Rep: Transcription factor APFI-like - Solanum tuberosum (Potato), partial (94%) [  | 621.54   | 1 |
| Unknown                                                                               | 536.37   | 1 |
| Unknown                                                                               | 11855.55 | 1 |
| gb AGN_RNC007xe20f1.ab1 AGN_RNC Nicotiana tabacum cDNA 5', mRNA sequence              | 2843.31  | 1 |
| gb TT-03_M04 K326 trichome library Nicotiana tabacum cDNA, mRNA sequence [F           | 56.49    | 1 |
| Unknown                                                                               | 49567.25 | 1 |
| gb TT-25_O04 Burley21 trichome library Nicotiana tabacum cDNA, mRNA sequence          | 309.09   | 1 |
| tc Rep: Chromosome chr13 scaffold_120, whole genome shotgun sequence - Vitis v        | 58.81    | 1 |
| tc Rep: Carotenoid cleavage dioxygenase 1 - Petunia hybrida (Petunia), partial (33%   | 59.84    | 1 |
| Unknown                                                                               | 517.23   | 1 |
| gb AM809585 seedling library, SL Nicotiana tabacum cDNA clone nt002013044, mRNA       | 158.22   | 1 |
| gb KP1B.110K05F.050727T7 KP1B Nicotiana tabacum cDNA clone KP1B.110K05, mRNA          | 41.16    | 1 |
| tc Rep: N-carbamoylputrescine amidase - Solanum tuberosum (Potato), partial (89%      | 138.18   | 1 |
| gb TT-40_P15 Samsun trichome library Nicotiana tabacum cDNA, mRNA sequence [          | 152      | 1 |
| tc Rep: ASH1 protein - Cupiennius salei (Wandering spider), partial (7%) [TC72324]    | 241.02   | 1 |
| tc Rep: Chromosome chr1 scaffold_75, whole genome shotgun sequence - Vitis vinif      | 5976.4   | 1 |
| tc Rep: Chromosome chr6 scaffold_3, whole genome shotgun sequence - Vitis vinif       | 32.73    | 1 |
| gb TT-05_I02 Burley21 trichome library Nicotiana tabacum cDNA, mRNA sequence          | 835.86   | 1 |
| gb TL13.107M09F.060315T7 TL13 Nicotiana tabacum cDNA clone TL13.107M09, mRNA          | 68.48    | 1 |
| gb Nicotiana tabacum ORF mRNA, complete cds [U66266]                                  | 1171.06  | 1 |
| gb AGN_RNC021xo20f1.ab1 AGN_RNC Nicotiana tabacum cDNA 5', mRNA sequence              | 18.58    | 1 |
| gb AM839551 COL, cold overnight library Nicotiana tabacum cDNA clone nt006145         | 25.47    | 1 |
| gb KR3B.111I14F.060119T7 KR3B Nicotiana tabacum cDNA clone KR3B.111I14, mRNA          | 336.73   | 1 |
| gb Nicotiana tabacum mRNA for 14-3-3 e-2 protein, complete cds [AB119475]             | 85.77    | 1 |
| tc Rep: 50S ribosomal protein L4 - Arabidopsis thaliana (Mouse-ear cress), partial (7 | 40.97    | 1 |
| Unknown                                                                               | 438.6    | 1 |
| tc Rep: Proteasome regulatory subunit-like - Arabidopsis thaliana (Mouse-ear cress    | 85.79    | 1 |
| tc Rep: S-adenosylmethionine decarboxylase proenzyme (AdoMetDC) (SamDC) [Cc           | 38865.1  | 1 |
| Unknown                                                                               | 75.73    | 1 |
| gb Nicotiana tabacum beta tubulin-like mRNA, partial sequence [EF051136]              | 55927.45 | 1 |
| Unknown                                                                               | 433.71   | 1 |

|                                                                                    |          |   |
|------------------------------------------------------------------------------------|----------|---|
| gb KF8C.109C04F.051215T7 KF8 Nicotiana tabacum cDNA clone KF8C.109C04, mRN         | 33341.6  | 1 |
| tc Rep: Chromosome chr7 scaffold_31, whole genome shotgun sequence - Vitis vin     | 1116.63  | 1 |
| gb Nicotiana tabacum DSK2 mRNA, complete cds [DQ672264]                            | 29.74    | 1 |
| Unknown                                                                            | 109.11   | 1 |
| gb KR3B.001N20F.050815T7 KR3B Nicotiana tabacum cDNA clone KR3B.001N20, m          | 50.03    | 1 |
| gb KP1B.104P12F.050725T7 KP1B Nicotiana tabacum cDNA clone KP1B.104P12, mI         | 100.13   | 1 |
| gb KN6B.100O04F.051019T7 KN6B Nicotiana tabacum cDNA clone KN6B.100O04, r          | 135.2    | 1 |
| gb KT7C.106D03F.051219T7 KT7 Nicotiana tabacum cDNA clone KT7C.106D03, mRI         | 276.32   | 1 |
| tc Rep: Fumarylacetoacetase - Medicago truncatula (Barrel medic), partial (55%) [T | 26.29    | 1 |
| gb TOBESTR057A11 TOBEST cDNA library 1 Nicotiana tabacum cDNA 5', mRNA seq         | 2803.6   | 1 |
| gb KT7B.103H13F.060124T7 KT7 Nicotiana tabacum cDNA clone KT7B.103H13, mR          | 1025.49  | 1 |
| tc Rep: Chromosome chr9 scaffold_7, whole genome shotgun sequence - Vitis vinif    | 384.29   | 1 |
| gb KF8C.101G14F.051214T7 KF8 Nicotiana tabacum cDNA clone KF8C.101G14, mRI         | 50663.2  | 1 |
| tc Rep: Chromosome chr17 scaffold_12, whole genome shotgun sequence - Vitis vi     | 208.28   | 1 |
| gb KR2B.112D12F.051230T7 KR2B Nicotiana tabacum cDNA clone KR2B.112D12, m          | 1518.95  | 1 |
| gb KR3B.109A07F.051111T7 KR3B Nicotiana tabacum cDNA clone KR3B.109A07, m          | 2171.19  | 1 |
| gb KP1B.101D14F.050722T7 KP1B Nicotiana tabacum cDNA clone KP1B.101D14, m          | 2215.02  | 1 |
| tc Rep: Chromosome chr2 scaffold_11, whole genome shotgun sequence - Vitis vin     | 35.46    | 1 |
| gb AGN_RNC024xi05r1.ab1 AGN_RNC Nicotiana tabacum cDNA 3', mRNA sequenc            | 21.72    | 1 |
| Unknown                                                                            | 18709.35 | 1 |
| gb TOBESTR063G03 TOBEST cDNA library 1 Nicotiana tabacum cDNA 5', mRNA seq         | 462.62   | 1 |
| gb KG9B.005F19F.050721T7 KG9B Nicotiana tabacum cDNA clone KG9B.005F19, m          | 203.46   | 1 |
| tc Rep: Chromosome undetermined scaffold_247, whole genome shotgun sequenc         | 29.4     | 1 |
| tc Rep: Chromosome chr1 scaffold_180, whole genome shotgun sequence - Vitis vi     | 116.18   | 1 |
| Unknown                                                                            | 98.2     | 1 |
| gb Nicotiana tabacum extracellular Ca2+ sensing receptor (cas) mRNA, complete cc   | 96.92    | 1 |
| tc Rep: Chromosome chr7 scaffold_42, whole genome shotgun sequence - Vitis vin     | 81.59    | 1 |
| tc Rep: Chromosome chr9 scaffold_7, whole genome shotgun sequence - Vitis vinif    | 129.24   | 1 |
| gb KN6B.104B13F.060103T7 KN6B Nicotiana tabacum cDNA clone KN6B.104B13, r          | 42.97    | 1 |
| gb KP1B.105A13F.060116T7 KP1B Nicotiana tabacum cDNA clone KP1B.105A13, m          | 134.45   | 1 |
| gb KF8B.201G17F.060124T7 KF8 Nicotiana tabacum cDNA clone KF8B.201G17, mRI         | 22.57    | 1 |
| tc Rep: Nuclear RNA binding protein - Nicotiana tabacum (Common tobacco), parti    | 73.85    | 1 |
| tc Rep: Chromosome chr6 scaffold_3, whole genome shotgun sequence - Vitis vinif    | 269.07   | 1 |
| Unknown                                                                            | 213.23   | 1 |

|                                                                                                |         |   |
|------------------------------------------------------------------------------------------------|---------|---|
| Unknown                                                                                        | 18.92   | 1 |
| gb Nicotiana tabacum mRNA for protein kinase 2 beta chain (ck2B1 gene) [AJ438261]              | 444.13  | 1 |
| tc Rep: Cellulose synthase - Solanum tuberosum (Potato), partial (9%) [TC56534]                | 57.93   | 1 |
| gb TT-04_E09 Samsun trichome library Nicotiana tabacum cDNA, mRNA sequence [E09]               | 38.67   | 1 |
| tc Rep: 14-3-3 i-2 protein - Nicotiana tabacum (Common tobacco), partial (39%) [TC56534]       | 187.89  | 1 |
| tc Rep: Granule-bound starch synthase 1, chloroplast precursor - Solanum tuberosum             | 237.56  | 1 |
| gb KL4B.107M19F.051126T7 KL4B Nicotiana tabacum cDNA clone KL4B.107M19, mRNA sequence [E09]    | 49      | 1 |
| gb BP526621 MAT001 Nicotiana tabacum cDNA clone BY11358, mRNA sequence [E09]                   | 22.66   | 1 |
| gb TT-35_A18 Samsun trichome library Nicotiana tabacum cDNA, mRNA sequence [E09]               | 178.66  | 1 |
| gb AGN_RNC123xj03f1.ab1 AGN_RNC Nicotiana tabacum cDNA 5', mRNA sequence [E09]                 | 134.51  | 1 |
| tc Rep: Chromosome chr1 scaffold_84, whole genome shotgun sequence - Vitis vinifera            | 26.22   | 1 |
| gb AGN_RNC024xg22f1.ab1 AGN_RNC Nicotiana tabacum cDNA 5', mRNA sequence [E09]                 | 644.74  | 1 |
| Unknown                                                                                        | 30.82   | 1 |
| Unknown                                                                                        | 19.87   | 1 |
| tc Rep: Ubiquitin carrier protein - Vitis vinifera (Grape), complete [TC48976]                 | 1131.53 | 1 |
| gb AGN_RNC006xi21f1.ab1 AGN_RNC Nicotiana tabacum cDNA 5', mRNA sequence [E09]                 | 32.48   | 1 |
| tc Rep: Chromosome chr18 scaffold_1, whole genome shotgun sequence - Vitis vinifera            | 391.02  | 1 |
| tc Rep: ADP-ribosylation factor - Daucus carota (Carrot), partial (96%) [TC46343]              | 184.79  | 1 |
| tc Rep: Chromosome undetermined scaffold_53, whole genome shotgun sequence - Vitis vinifera    | 1192.08 | 1 |
| Unknown                                                                                        | 66.63   | 1 |
| tc Rep: Chromosome chr12 scaffold_36, whole genome shotgun sequence - Vitis vinifera           | 9458.26 | 1 |
| tc Rep: Peroxiredoxin - Ipomoea batatas (Sweet potato) (Batate), complete [TC4621]             | 45.76   | 1 |
| Unknown                                                                                        | 521.01  | 1 |
| tc Rep: Chromosome chr5 scaffold_72, whole genome shotgun sequence - Vitis vinifera            | 331.57  | 1 |
| tc Rep: Chromosome chr5 scaffold_2, whole genome shotgun sequence - Vitis vinifera             | 1421.91 | 1 |
| gb KT7C.109G08F.051221T7 KT7 Nicotiana tabacum cDNA clone KT7C.109G08, mRNA sequence [E09]     | 251.52  | 1 |
| Unknown                                                                                        | 79.89   | 1 |
| gb Nicotiana tabacum mRNA for caffeoyl-CoA O-methyltransferase 5, CCoAOMT-5 gene               | 73.58   | 1 |
| tc Rep: Polypeptide with reverse transcriptase and RNaseH domains - Petunia hybrid             | 26.56   | 1 |
| tc Rep: Cytochrome b6 - Nicotiana glauca (Wood tobacco), partial (48%) [TC7411]                | 27.07   | 1 |
| Unknown                                                                                        | 79.73   | 1 |
| tc Rep: Ubiquitin carboxyl-terminal hydrolase - Vitis vinifera (Grape), partial (58%) [TC7411] | 92.07   | 1 |
| gb EST_CSP003xo16f1.ab1 EST_CSP Nicotiana tabacum cDNA, mRNA sequence [E09]                    | 35.05   | 1 |
| Unknown                                                                                        | 1363.76 | 1 |

|                                                                                                 |          |   |
|-------------------------------------------------------------------------------------------------|----------|---|
| tc Rep: Chromosome chr5 scaffold_2, whole genome shotgun sequence - Vitis vinifera              | 103.25   | 1 |
| Unknown                                                                                         | 31.48    | 1 |
| gb KP1B.112H03F.060117T7 KP1B Nicotiana tabacum cDNA clone KP1B.112H03, mRNA sequence           | 413.84   | 1 |
| gb KL4B.104D22F.051104T7 KL4B Nicotiana tabacum cDNA clone KL4B.104D22, mRNA sequence           | 106.58   | 1 |
| gb CHO_SL026xb05f1.ab1 CHO_SL Nicotiana tabacum cDNA, mRNA sequence [EH6]                       | 192.86   | 1 |
| gb KF8C.106B04F.051215T7 KF8 Nicotiana tabacum cDNA clone KF8C.106B04, mRNA sequence            | 87.15    | 1 |
| Unknown                                                                                         | 545.47   | 1 |
| tc Rep: Biotin carboxylase carrier protein - Solanum lycopersicum (Tomato) (Lycopersicon)       | 54.93    | 1 |
| Unknown                                                                                         | 11867.95 | 1 |
| tc Rep: Voltage-dependent anion channel - Nicotiana tabacum (Common tobacco), mRNA sequence     | 221.25   | 1 |
| tc Rep: FOG: CBS domain protein - Vibrio sp. MED222, partial (4%) [TC50283]                     | 34.7     | 1 |
| tc Rep: Chromosome chr7 scaffold_31, whole genome shotgun sequence - Vitis vinifera             | 982.8    | 1 |
| gb KL4B.102A03F.051125T7 KL4B Nicotiana tabacum cDNA clone KL4B.102A03, mRNA sequence           | 26.59    | 1 |
| gb TT-13_H21 Samsun trichome library Nicotiana tabacum cDNA, mRNA sequence                      | 546.61   | 1 |
| Unknown                                                                                         | 180.49   | 1 |
| gb KR3B.109F14F.051111T7 KR3B Nicotiana tabacum cDNA clone KR3B.109F14, mRNA sequence           | 103.01   | 1 |
| tc Rep: Chromosome chr13 scaffold_48, whole genome shotgun sequence - Vitis vinifera            | 31.03    | 1 |
| Unknown                                                                                         | 516.81   | 1 |
| tc Rep: CXE carboxylesterase - Actinidia eriantha, partial (45%) [TC41276]                      | 79.45    | 1 |
| gb KF8C.101H16F.051214T7 KF8 Nicotiana tabacum cDNA clone KF8C.101H16, mRNA sequence            | 47.89    | 1 |
| gb Nicotiana tabacum potyviral capsid protein interacting protein 1 (CPIP1) mRNA, mRNA sequence | 19.11    | 1 |
| gb KR3B.103K10F.051108T7 KR3B Nicotiana tabacum cDNA clone KR3B.103K10, mRNA sequence           | 18.82    | 1 |
| tc Rep: Chromosome chr15 scaffold_37, whole genome shotgun sequence - Vitis vinifera            | 29.07    | 1 |
| gb KN6B.102N01F.051230T7 KN6B Nicotiana tabacum cDNA clone KN6B.102N01, mRNA sequence           | 20.56    | 1 |
| tc Rep: Chromosome chr11 scaffold_13, whole genome shotgun sequence - Vitis vinifera            | 558.97   | 1 |
| gb AGN_RPC011xo17f1.ab1 AGN_RPC Nicotiana tabacum cDNA 5', mRNA sequence                        | 49.14    | 1 |
| Unknown                                                                                         | 11149.6  | 1 |
| gb TT-21_L03 Burley21 trichome library Nicotiana tabacum cDNA, mRNA sequence                    | 258.32   | 1 |
| gb KF8B.100N14F.151010T7 KF8 Nicotiana tabacum cDNA clone KF8B.100N14, mRNA sequence            | 44.37    | 1 |
| Unknown                                                                                         | 26.33    | 1 |
| tc Rep: Chromosome undetermined scaffold_296, whole genome shotgun sequence - Vitis vinifera    | 48.02    | 1 |
| Unknown                                                                                         | 13457.95 | 1 |
| Unknown                                                                                         | 16508.35 | 1 |
| tc Rep: Ribosomal protein L3A - Nicotiana tabacum (Common tobacco), partial (59%)               | 31.91    | 1 |

|                                                                                     |         |   |
|-------------------------------------------------------------------------------------|---------|---|
| gb AGN_ELP026xk21f1.ab1 AGN_ELP Nicotiana tabacum cDNA 5', mRNA sequence            | 294.22  | 1 |
| gb AGN_RNC116xo18f1.ab1 AGN_RNC Nicotiana tabacum cDNA 5', mRNA sequenc             | 20.31   | 1 |
| Unknown                                                                             | 21.38   | 1 |
| gb KG9B.103A12F.051128T7 KG9B Nicotiana tabacum cDNA clone KG9B.103A12, n           | 80.56   | 1 |
| tc Rep: Alpha chain of nascent polypeptide associated complex - Nicotiana benthar   | 29.8    | 1 |
| tc Rep: Chromosome chr8 scaffold_106, whole genome shotgun sequence - Vitis vi      | 79.78   | 1 |
| gb AGN_RNC112xn05f1.ab1 AGN_RNC Nicotiana tabacum cDNA 5', mRNA sequenc             | 68.04   | 1 |
| Unknown                                                                             | 1537.65 | 1 |
| gb Nicotiana tabacum mRNA for putative zinc transporter (C477 gene) [AM851010]      | 515.86  | 1 |
| tc Rep: Chromosome chr8 scaffold_99, whole genome shotgun sequence - Vitis vin      | 2301.12 | 1 |
| Unknown                                                                             | 31.06   | 1 |
| gb BP128741 MAT001 Nicotiana tabacum cDNA clone BY522, mRNA sequence [BP:           | 27.83   | 1 |
| Unknown                                                                             | 25.47   | 1 |
| Unknown                                                                             | 169.42  | 1 |
| gb KN6B.110O02F.060106T7 KN6B Nicotiana tabacum cDNA clone KN6B.110O02, r           | 99.35   | 1 |
| gb KP1B.113M20F.060117T7 KP1B Nicotiana tabacum cDNA clone KP1B.113M20, r           | 170.88  | 1 |
| gb AGN_PNL210bf1_h1.trimmed.seq AGN_PNL Nicotiana tabacum cDNA 5', mRNA             | 44.64   | 1 |
| gb TT-03_A08 K326 early senescent leaf library Nicotiana tabacum cDNA, mRNA se      | 1123.73 | 1 |
| tc Rep: Auxin conjugate hydrolase - Medicago truncatula (Barrel medic), partial (56 | 23.62   | 1 |
| gb Nicotiana tabacum mRNA for protein kinase (NPK2), complete cds [D31964]          | 74.86   | 1 |
| gb TT-24_I03 Samsun trichome library Nicotiana tabacum cDNA, mRNA sequence [        | 25.09   | 1 |
| Unknown                                                                             | 57.87   | 1 |
| tc Rep: Enolase - Solanum lycopersicum (Tomato) (Lycopersicon esculentum), parti    | 72.4    | 1 |
| Unknown                                                                             | 1561.83 | 1 |
| gb TT-24_N21 K326 trichome library Nicotiana tabacum cDNA, mRNA sequence [FC        | 31.31   | 1 |
| Unknown                                                                             | 136.85  | 1 |
| Unknown                                                                             | 38.16   | 1 |
| gb Nicotiana tabacum cDNA-AFLP-fragment BSTT4-23-480, cultivar Bright Yellow 2      | 101.19  | 1 |
| tc Rep: Chromosome chr12 scaffold_18, whole genome shotgun sequence - Vitis vi      | 21.24   | 1 |
| gb KG9B.103K15F.051128T7 KG9B Nicotiana tabacum cDNA clone KG9B.103K15, m           | 38.43   | 1 |
| tc Rep: NAD-dependent epimerase/dehydratase family protein-like protein - Solan     | 8914.59 | 1 |
| Unknown                                                                             | 28.21   | 1 |
| tc Rep: Chromosome chr11 scaffold_14, whole genome shotgun sequence - Vitis vi      | 41.19   | 1 |
| gb N.tabacum mRNA for NAD-dependent isocitrate dehydrogenase [X96727]               | 1565.63 | 1 |



|                                                                                       |         |   |
|---------------------------------------------------------------------------------------|---------|---|
| gb Nicotiana tabacum NtTPC1B mRNA for two-pore calcium channel, complete cds          | 51.79   | 1 |
| gb TOBESTR029D10 TOBEST cDNA library 1 Nicotiana tabacum cDNA 5', mRNA seq            | 1217.02 | 1 |
| gb KN6B.100G11F.051019T7 KN6B Nicotiana tabacum cDNA clone KN6B.100G11, r             | 3233.17 | 1 |
| tc Rep: Signal recognition particle 54 kDa protein 1 - Solanum lycopersicum (Tomat    | 1489.89 | 1 |
| Unknown                                                                               | 604.2   | 1 |
| gb KG9B.003P13F.050720T7 KG9B Nicotiana tabacum cDNA clone KG9B.003P13, m             | 238.62  | 1 |
| Unknown                                                                               | 390.27  | 1 |
| tc Rep: ATP-dependent RNA helicase-like protein DB10 - Nicotiana sylvestris (Wooc     | 524.59  | 1 |
| gb KP1B.110I19F.050727T7 KP1B Nicotiana tabacum cDNA clone KP1B.110I19, mRI           | 219.48  | 1 |
| gb TT-29_E24 tobacco leaf library Nicotiana tabacum cDNA, mRNA sequence [FG63         | 162.7   | 1 |
| gb KN6B.103K11F.060103T7 KN6B Nicotiana tabacum cDNA clone KN6B.103K11, r             | 59.34   | 1 |
| gb CHO_SL028xg02f1.ab1 CHO_SL Nicotiana tabacum cDNA, mRNA sequence [EH6              | 2913.95 | 1 |
| tc Rep: 60s acidic ribosomal protein-like protein - Solanum tuberosum (Potato), pai   | 5775.65 | 1 |
| tc Rep: Genomic DNA, chromosome 5, TAC clone: K19P17 - Arabidopsis thaliana (M        | 143.18  | 1 |
| tc Rep: Chromosome chr19 scaffold_4, whole genome shotgun sequence - Vitis vin        | 93.01   | 1 |
| gb TT-02_F09 Samsun trichome library Nicotiana tabacum cDNA, mRNA sequence            | 95.8    | 1 |
| tc Rep: zinc finger (C3HC4-type RING finger) family protein - Arabidopsis thaliana, p | 120.96  | 1 |
| Unknown                                                                               | 17.24   | 1 |
| gb KF8C.109K05F.051215T7 KF8 Nicotiana tabacum cDNA clone KF8C.109K05, mRN            | 38.07   | 1 |
| Unknown                                                                               | 26.72   | 1 |
| gb AGN_PNL210br1_g4.trimmed.seq AGN_PNL Nicotiana tabacum cDNA 3', mRNA               | 139.94  | 1 |
| tc Rep: Chromosome chr8 scaffold_34, whole genome shotgun sequence - Vitis vin        | 72.56   | 1 |
| gb KP1B.001P21F.050628T7 KP1B Nicotiana tabacum cDNA clone KP1B.001P21, mI            | 985.12  | 1 |
| tc Rep: MRNA, complete cds, clone: RAFL25-18-P16 - Arabidopsis thaliana (Mouse-       | 28.59   | 1 |
| gb KP1B.037G02F.050623T7 KP1B Nicotiana tabacum cDNA clone KP1B.037G02, m             | 905.21  | 1 |
| gb TOBESTR068F07 TOBEST cDNA library 1 Nicotiana tabacum cDNA 5', mRNA seq            | 915.31  | 1 |
| gb AGN_ELP006xa10f1.ab1 AGN_ELP Nicotiana tabacum cDNA 5', mRNA sequence              | 28.76   | 1 |
| gb AGN_ELP006xa11f1.ab1 AGN_ELP Nicotiana tabacum cDNA 5', mRNA sequence              | 100.56  | 1 |
| tc Rep: Hexokinase 6 - Nicotiana tabacum (Common tobacco), complete [TC53358]         | 25.31   | 1 |
| tc Rep: Chromosome chr6 scaffold_25, whole genome shotgun sequence - Vitis vin        | 109.81  | 1 |
| Unknown                                                                               | 58.07   | 1 |
| gb KT7C.101N20F.051216T7 KT7 Nicotiana tabacum cDNA clone KT7C.101N20, mR             | 5197.05 | 1 |
| Unknown                                                                               | 32.21   | 1 |
| tc Rep: PttA' - Petunia hybrida (Petunia), partial (24%) [TC70893]                    | 118.34  | 1 |

|                                                                                       |         |   |
|---------------------------------------------------------------------------------------|---------|---|
| gb KP1B.102L23F.050722T7 KP1B Nicotiana tabacum cDNA clone KP1B.102L23, mR            | 8538.08 | 1 |
| tc Rep: Chromosome chr11 scaffold_13, whole genome shotgun sequence - Vitis vi        | 92.71   | 1 |
| Unknown                                                                               | 592.51  | 1 |
| gb Nicotiana tabacum NtUGPase mRNA for UDP-glucose pyrophosphorylase, partia          | 222.57  | 1 |
| Unknown                                                                               | 20.53   | 1 |
| gb AGN_RNC105xg14f1.ab1 AGN_RNC Nicotiana tabacum cDNA 5', mRNA sequenc               | 42.52   | 1 |
| tc Rep: Chromosome chr14 scaffold_21, whole genome shotgun sequence - Vitis vi        | 46.2    | 1 |
| Unknown                                                                               | 3169.71 | 1 |
| Unknown                                                                               | 142.36  | 1 |
| tc Rep: Uncharacterized protein At5g64816 precursor - Arabidopsis thaliana (Mous      | 54.19   | 1 |
| gb KN6B.101J07F.051230T7 KN6B Nicotiana tabacum cDNA clone KN6B.101J07, mI            | 256.57  | 1 |
| gb KR2B.101M21F.060128T7 KR2B Nicotiana tabacum cDNA clone KR2B.101M21, r             | 42.63   | 1 |
| tc Rep: Chromosome chr19 scaffold_66, whole genome shotgun sequence - Vitis vi        | 23.17   | 1 |
| gb KG9B.004D22F.050721T7 KG9B Nicotiana tabacum cDNA clone KG9B.004D22, n             | 88.43   | 1 |
| tc Rep: Genomic DNA, chromosome 3, P1 clone: MJK13 - Arabidopsis thaliana (Moi        | 22.16   | 1 |
| Unknown                                                                               | 995.99  | 1 |
| Unknown                                                                               | 81.03   | 1 |
| tc Rep: Protein kinase CK2 alpha chain - Nicotiana tabacum (Common tobacco), cor      | 27.56   | 1 |
| gb EST_CSP001xb13f1.ab1 EST_CSP Nicotiana tabacum cDNA, mRNA sequence [EH             | 525.75  | 1 |
| tc Rep: Chromosome undetermined scaffold_1169, whole genome shotgun sequen            | 66.32   | 1 |
| Unknown                                                                               | 111.13  | 1 |
| Unknown                                                                               | 517.87  | 1 |
| gb CHO_SL028xg02f1.ab1 CHO_SL Nicotiana tabacum cDNA, mRNA sequence [EH6              | 2700.04 | 1 |
| gb TT-38_F10 tobacco leaf library Nicotiana tabacum cDNA, mRNA sequence [FG63         | 36.89   | 1 |
| tc Rep: Os09g0505800 protein - Oryza sativa subsp. japonica (Rice), partial (86%) [T  | 50.89   | 1 |
| gb KT7C.108C02F.051219T7 KT7 Nicotiana tabacum cDNA clone KT7C.108C02, mR             | 24.78   | 1 |
| Unknown                                                                               | 825.19  | 1 |
| gb KL4B.105M19F.051104T7 KL4B Nicotiana tabacum cDNA clone KL4B.105M19, n             | 94.91   | 1 |
| Unknown                                                                               | 76.65   | 1 |
| Unknown                                                                               | 4093.72 | 1 |
| gb KL4B.102K07F.051125T7 KL4B Nicotiana tabacum cDNA clone KL4B.102K07, mR            | 449.73  | 1 |
| tc Rep: Chromosome chr12 scaffold_18, whole genome shotgun sequence - Vitis vi        | 243.91  | 1 |
| tc Rep: AT4g32020/F10N7_170 - Arabidopsis thaliana (Mouse-ear cress), partial (18     | 675.25  | 1 |
| tc Rep: Expressed protein - Oryza sativa subsp. japonica (Rice), partial (91%) [TC511 | 36.15   | 1 |

|                                                                                   |          |   |
|-----------------------------------------------------------------------------------|----------|---|
| gb AGN_ELP017xe10f1.ab1 AGN_ELP Nicotiana tabacum cDNA 5', mRNA sequence          | 27.7     | 1 |
| gb TT-49_B08 Burley21 trichome library Nicotiana tabacum cDNA, mRNA sequence      | 362.44   | 1 |
| tc Rep: Chromosome chr14 scaffold_26, whole genome shotgun sequence - Vitis vi    | 710.43   | 1 |
| Unknown                                                                           | 31.26    | 1 |
| Unknown                                                                           | 116.3    | 1 |
| Unknown                                                                           | 70.79    | 1 |
| gb KT7B.114G03F.060127T7 KT7 Nicotiana tabacum cDNA clone KT7B.114G03, mR         | 71.28    | 1 |
| gb TT-06_E16 K326 late senescent leaf library Nicotiana tabacum cDNA, mRNA seq    | 34.94    | 1 |
| Unknown                                                                           | 20465.15 | 1 |
| Unknown                                                                           | 25.95    | 1 |
| tc Rep: Hsc70 - Solanum lycopersicum (Tomato) (Lycopersicon esculentum), partial  | 49.8     | 1 |
| Unknown                                                                           | 26.6     | 1 |
| Unknown                                                                           | 31.82    | 1 |
| tc Rep: Arginine decarboxylase 2 - Nicotiana tabacum (Common tobacco), complet    | 11260.8  | 1 |
| Unknown                                                                           | 984.59   | 1 |
| tc Rep: F22G5.1 - Arabidopsis thaliana (Mouse-ear cress), partial (51%) [TC62580] | 29.88    | 1 |
| gb KL4B.107L17F.051126T7 KL4B Nicotiana tabacum cDNA clone KL4B.107L17, mRI       | 178.65   | 1 |
| gb KF8C.110C04F.051216T7 KF8 Nicotiana tabacum cDNA clone KF8C.110C04, mRN        | 854.75   | 1 |
| gb KL4B.100H13F.050922T7 KL4B Nicotiana tabacum cDNA clone KL4B.100H13, mF        | 58.36    | 1 |
| gb KL4B.105G10F.051104T7 KL4B Nicotiana tabacum cDNA clone KL4B.105G10, mF        | 88.84    | 1 |
| gb Nicotiana tabacum hexokinase 3 (Hxk3) mRNA, complete cds [AY553216]            | 2583.37  | 1 |
| tc Rep: Chromosome chr7 scaffold_20, whole genome shotgun sequence - Vitis vin    | 159.15   | 1 |
| gb KG9B.002C22F.050720T7 KG9B Nicotiana tabacum cDNA clone KG9B.002C22, m         | 215.17   | 1 |
| gb Nicotiana tabacum anther ethylene-upregulated protein ER1 (ER1) mRNA, parti    | 45.8     | 1 |
| Unknown                                                                           | 76.94    | 1 |
| Unknown                                                                           | 20.93    | 1 |
| gb KL4B.102L15F.051125T7 KL4B Nicotiana tabacum cDNA clone KL4B.102L15, mRI       | 637.1    | 1 |
| tc Rep: Flagellin - Escherichia coli, partial (5%) [TC72631]                      | 28       | 1 |
| Unknown                                                                           | 444.3    | 1 |
| gb KT7C.105D19F.051219T7 KT7 Nicotiana tabacum cDNA clone KT7C.105D19, mRI        | 128.81   | 1 |
| gb BP526356 MAT001 Nicotiana tabacum cDNA clone BY11073, mRNA sequence [E         | 57.84    | 1 |
| Unknown                                                                           | 242.19   | 1 |
| gb AGN_RNC023xf11f1.ab1 AGN_RNC Nicotiana tabacum cDNA 5', mRNA sequenc           | 24.56    | 1 |
| gb KG9B.103I01F.051128T7 KG9B Nicotiana tabacum cDNA clone KG9B.103I01, mR        | 111.46   | 1 |

|                                                                                    |         |   |
|------------------------------------------------------------------------------------|---------|---|
| gb AGN_RNC106xf10f1.ab1 AGN_RNC Nicotiana tabacum cDNA 5', mRNA sequenc            | 9321.23 | 1 |
| tc Rep: Diacylglycerol kinase variant A - Solanum lycopersicum (Tomato) (Lycopersi | 2730.44 | 1 |
| gb TOBESTR061H08 TOBEST cDNA library 1 Nicotiana tabacum cDNA 5', mRNA seq         | 29.09   | 1 |
| Unknown                                                                            | 1410.41 | 1 |
| tc Rep: Chromosome chr2 scaffold_176, whole genome shotgun sequence - Vitis vi     | 335.75  | 1 |
| gb AGN_ELP017xm11f1.ab1 AGN_ELP Nicotiana tabacum cDNA 5', mRNA sequenc            | 94.42   | 1 |
| gb Nicotiana tabacum phospholipase C1 mRNA, complete cds [AF223351]                | 9654.21 | 1 |
| gb KR3B.107O20F.051110T7 KR3B Nicotiana tabacum cDNA clone KR3B.107O20, m          | 139.9   | 1 |
| tc Rep: Chromosome chr1 scaffold_5, whole genome shotgun sequence - Vitis vinif    | 146.58  | 1 |
| gb Nicotiana tabacum NtRDR6 mRNA for RNA-dependent RNA polymerase 6, comp          | 22.6    | 1 |
| tc Rep: Chromosome undetermined scaffold_1099, whole genome shotgun sequen         | 1833.94 | 1 |
| tc Rep: Chromosome undetermined scaffold_125, whole genome shotgun sequenc         | 2417.96 | 1 |
| tc Rep: Dihydrolipoyllysine-residue acetyltransferase component 2 of pyruvate deh  | 525.55  | 1 |
| tc GB AJ311779.1 CAC84548.1 dicarboxylate/tricarboxylate carrier [Nicotiana tab    | 27.64   | 1 |
| tc Rep: M19 protein - Murine cytomegalovirus (strain K181), partial (11%) [TC5787: | 107.19  | 1 |
| Unknown                                                                            | 866.38  | 1 |
| gb Nicotiana tabacum plastid phosphate [U66402]                                    | 177.05  | 1 |
| gb KP1B.110H07F.050727T7 KP1B Nicotiana tabacum cDNA clone KP1B.110H07, m          | 54.1    | 1 |
| gb KT7C.106B03F.051219T7 KT7 Nicotiana tabacum cDNA clone KT7C.106B03, mR          | 11308.9 | 1 |
| gb TT-24_E16 K326 late senescent leaf library Nicotiana tabacum cDNA, mRNA seq     | 25.69   | 1 |
| gb KL4B.101K17F.051103T7 KL4B Nicotiana tabacum cDNA clone KL4B.101K17, mR         | 70.6    | 1 |
| gb TT-05_A21 K326 trichome library Nicotiana tabacum cDNA, mRNA sequence [FC       | 267.4   | 1 |
| tc Rep: Chromosome chr14 scaffold_27, whole genome shotgun sequence - Vitis vi     | 128.89  | 1 |
| gb AGN_ELP024xn17f1.ab1 AGN_ELP Nicotiana tabacum cDNA 5', mRNA sequence           | 448.3   | 1 |
| tc Rep: Chromosome chr8 scaffold_23, whole genome shotgun sequence - Vitis vin     | 651.7   | 1 |
| tc Rep: Chromosome undetermined scaffold_147, whole genome shotgun sequenc         | 22.96   | 1 |
| gb BP528728 MAT001 Nicotiana tabacum cDNA clone BY13589, mRNA sequence [E          | 84.62   | 1 |
| gb AGN_RNC127xb20f1.ab1 AGN_RNC Nicotiana tabacum cDNA 5', mRNA sequenc            | 841.38  | 1 |
| tc Rep: Chromosome undetermined scaffold_1268, whole genome shotgun sequen         | 153.16  | 1 |
| tc Rep: Acyltransferase homolog - Petunia hybrida (Petunia), partial (65%) [TC5160 | 32.59   | 1 |
| gb AGN_PNL222af1_e7.trimmed.seq AGN_PNL Nicotiana tabacum cDNA 5', mRNA            | 56.45   | 1 |
| Unknown                                                                            | 17.06   | 1 |
| Unknown                                                                            | 35.4    | 1 |
| tc Rep: Chromosome chr18 scaffold_1, whole genome shotgun sequence - Vitis vin     | 192.46  | 1 |

|                                                                                    |         |   |
|------------------------------------------------------------------------------------|---------|---|
| gb Nicotiana tabacum nuclease mRNA, partial cds [AY029749]                         | 57.38   | 1 |
| Unknown                                                                            | 755.86  | 1 |
| Unknown                                                                            | 27.95   | 1 |
| gb AGN_ELP017xg15f1.ab1 AGN_ELP Nicotiana tabacum cDNA 5', mRNA sequence           | 92.19   | 1 |
| tc Rep: Chromosome chr2 scaffold_176, whole genome shotgun sequence - Vitis vi     | 141.14  | 1 |
| gb KF8C.103N20F.051214T7 KF8 Nicotiana tabacum cDNA clone KF8C.103N20, mR          | 27.35   | 1 |
| gb Nicotiana tabacum cDNA-AFLP-fragment BSTT21-1-220, cultivar Bright Yellow 2     | 48.75   | 1 |
| gb TT-48_C09 K326 late senescent leaf library Nicotiana tabacum cDNA, mRNA seq     | 507.57  | 1 |
| gb KR3B.104D11F.051108T7 KR3B Nicotiana tabacum cDNA clone KR3B.104D11, m          | 1717.12 | 1 |
| gb TT-05_J09 Samsun trichome library Nicotiana tabacum cDNA, mRNA sequence [       | 252.55  | 1 |
| Unknown                                                                            | 51.56   | 1 |
| gb TT-23_H09 Samsun trichome library Nicotiana tabacum cDNA, mRNA sequence         | 64.06   | 1 |
| tc Rep: Chromosome chr11 scaffold_13, whole genome shotgun sequence - Vitis vi     | 35.28   | 1 |
| Unknown                                                                            | 26.14   | 1 |
| tc Rep: Chromosome chr6 scaffold_3, whole genome shotgun sequence - Vitis vinif    | 21.56   | 1 |
| tc Rep: Chromosome chr8 scaffold_34, whole genome shotgun sequence - Vitis vin     | 70.38   | 1 |
| tc Rep: Ribosomal protein L39 - Triticum aestivum (Wheat), complete [TC62239]      | 52.12   | 1 |
| Unknown                                                                            | 42.49   | 1 |
| gb TT-36_B15 Samsun trichome library Nicotiana tabacum cDNA, mRNA sequence         | 95.86   | 1 |
| tc Rep: Growth-on protein GRO11 - Euphorbia esula (Leafy spurge), partial (21%) [T | 30.96   | 1 |
| Unknown                                                                            | 72.83   | 1 |
| gb KL4B.111C19F.060128T7 KL4B Nicotiana tabacum cDNA clone KL4B.111C19, mR         | 43.64   | 1 |
| gb Nicotiana tabacum PCNA mRNA for proliferating cell nuclear antigen, complete    | 19.09   | 1 |
| gb KR2B.115B01F.051230T7 KR2B Nicotiana tabacum cDNA clone KR2B.115B01, m          | 124.02  | 1 |
| tc Rep: Chromosome chr4 scaffold_6, whole genome shotgun sequence - Vitis vinif    | 64.4    | 1 |
| gb AGN_PNL210df1_g3.trimmed.seq AGN_PNL Nicotiana tabacum cDNA 5', mRNA            | 377.93  | 1 |
| tc Rep: Chromosome chr14 scaffold_27, whole genome shotgun sequence - Vitis vi     | 242.23  | 1 |
| gb KP1B.105G14F.060116T7 KP1B Nicotiana tabacum cDNA clone KP1B.105G14, m          | 94.89   | 1 |
| Unknown                                                                            | 1889.92 | 1 |
| Unknown                                                                            | 24.45   | 1 |
| Unknown                                                                            | 40.63   | 1 |
| Unknown                                                                            | 2904.33 | 1 |
| tc Rep: Chromosome chr11 scaffold_13, whole genome shotgun sequence - Vitis vi     | 22.06   | 1 |
| gb TT-29_O01 tobacco leaf library Nicotiana tabacum cDNA, mRNA sequence [FG6:      | 122.82  | 1 |

|                                                                                       |         |   |
|---------------------------------------------------------------------------------------|---------|---|
| gb KG9B.001D20F.050628T7 KG9B Nicotiana tabacum cDNA clone KG9B.001D20, n             | 339.39  | 1 |
| Unknown                                                                               | 79.04   | 1 |
| tc Rep: JAB - Solanum lycopersicum (Tomato) (Lycopersicon esculentum), partial (8     | 107.48  | 1 |
| gb KL4B.103L20F.051103T7 KL4B Nicotiana tabacum cDNA clone KL4B.103L20, mRI           | 391.53  | 1 |
| Unknown                                                                               | 859.06  | 1 |
| gb KG9B.003O19F.050720T7 KG9B Nicotiana tabacum cDNA clone KG9B.003O19, r             | 22.4    | 1 |
| gb TT-21_B07 Burley21 trichome library Nicotiana tabacum cDNA, mRNA sequence          | 411.21  | 1 |
| Unknown                                                                               | 219.34  | 1 |
| tc Rep: Chromosome chr17 scaffold_12, whole genome shotgun sequence - Vitis vi        | 512.45  | 1 |
| tc Rep: Chromosome chr11 scaffold_13, whole genome shotgun sequence - Vitis vi        | 101.55  | 1 |
| gb KF8C.101C05F.051214T7 KF8 Nicotiana tabacum cDNA clone KF8C.101C05, mRN            | 499.38  | 1 |
| gb Nicotiana tabacum cDNA-AFLP-fragment BSTC3-41-290, cultivar Bright Yellow 2        | 3369.91 | 1 |
| gb KF8C.101G18F.051214T7 KF8 Nicotiana tabacum cDNA clone KF8C.101G18, mRI            | 199.08  | 1 |
| tc Rep: Chromosome chr12 scaffold_18, whole genome shotgun sequence - Vitis vi        | 24.64   | 1 |
| gb KR3B.113P03F.060119T7 KR3B Nicotiana tabacum cDNA clone KR3B.113P03, mI            | 1114.71 | 1 |
| gb KN6B.108G03F.060106T7 KN6B Nicotiana tabacum cDNA clone KN6B.108G03, n             | 1855.2  | 1 |
| tc Rep: Chromosome chr13 scaffold_17, whole genome shotgun sequence - Vitis vi        | 273.02  | 1 |
| tc Rep: Cathepsin B-like cysteine proteinase - Nicotiana rustica (Aztec tobacco), par | 4070.85 | 1 |
| tc Rep: Pto-like serine/threonine kinase - Capsicum chinense (Scotch bonnet) (Bonr    | 66.45   | 1 |
| gb KL4B.106M24F.051125T7 KL4B Nicotiana tabacum cDNA clone KL4B.106M24, n             | 512.33  | 1 |
| tc Rep: Endoplasmin homolog precursor - Catharanthus roseus (Rosy periwinkle) (N      | 517.63  | 1 |
| tc Rep: SKP1-like protein - Nicotiana clevelandii (Wild tobacco), complete [TC50857   | 3566.56 | 1 |
| Unknown                                                                               | 723.38  | 1 |
| gb N.tabacum npp4 mRNA for protein phosphatase type 2A [Z93771]                       | 550.2   | 1 |
| tc Rep: Chromosome chr2 scaffold_176, whole genome shotgun sequence - Vitis vi        | 753.22  | 1 |
| tc Rep: Chromosome chr9 scaffold_7, whole genome shotgun sequence - Vitis vinif       | 65.28   | 1 |
| gb AGN_ELP005xm21f1.ab1 AGN_ELP Nicotiana tabacum cDNA 5', mRNA sequence              | 19.04   | 1 |
| Unknown                                                                               | 187.5   | 1 |
| gb KP1B.109B14F.050727T7 KP1B Nicotiana tabacum cDNA clone KP1B.109B14, mI            | 85.68   | 1 |
| Unknown                                                                               | 160.72  | 1 |
| Unknown                                                                               | 79.82   | 1 |
| tc Rep: Copper-transporting P-type ATPase - Brassica napus (Rape), partial (37%) [T   | 265.18  | 1 |
| gb KP1B.108P09F.050726T7 KP1B Nicotiana tabacum cDNA clone KP1B.108P09, mI            | 4140.98 | 1 |
| gb AGN_ELP005xp12f1.ab1 AGN_ELP Nicotiana tabacum cDNA 5', mRNA sequence              | 26.56   | 1 |

|                                                                                  |         |   |
|----------------------------------------------------------------------------------|---------|---|
| tc Rep: Ubiquitin carrier protein - Glycine max (Soybean), complete [TC51935]    | 38.1    | 1 |
| Unknown                                                                          | 18.8    | 1 |
| Unknown                                                                          | 35.64   | 1 |
| gb KR3B.110I10F.051111T7 KR3B Nicotiana tabacum cDNA clone KR3B.110I10, mRl      | 83.92   | 1 |
| Unknown                                                                          | 20.94   | 1 |
| Unknown                                                                          | 100.49  | 1 |
| tc Rep: Chromosome chr15 scaffold_37, whole genome shotgun sequence - Vitis vi   | 1494.73 | 1 |
| tc Rep: Chromosome chr8 scaffold_68, whole genome shotgun sequence - Vitis vin   | 1174.84 | 1 |
| gb TT-50_M03 K326 late senescent leaf library Nicotiana tabacum cDNA, mRNA sec   | 542.37  | 1 |
| tc Rep: Chromosome chr13 scaffold_210, whole genome shotgun sequence - Vitis v   | 551.36  | 1 |
| gb CHO_SL002xg07f1.ab1 CHO_SL Nicotiana tabacum cDNA, mRNA sequence [EH6         | 233.33  | 1 |
| Unknown                                                                          | 593.42  | 1 |
| Unknown                                                                          | 541.88  | 1 |
| gb KN6B.115A22F.060127T7 KN6B Nicotiana tabacum cDNA clone KN6B.115A22, n        | 250.98  | 1 |
| gb KN6B.102F13F.051230T7 KN6B Nicotiana tabacum cDNA clone KN6B.102F13, m        | 947.51  | 1 |
| gb KP1B.109C17F.050727T7 KP1B Nicotiana tabacum cDNA clone KP1B.109C17, ml       | 252.31  | 1 |
| tc Rep: Chromosome chr17 scaffold_16, whole genome shotgun sequence - Vitis vi   | 42.13   | 1 |
| tc Rep: Chromosome chr6 scaffold_25, whole genome shotgun sequence - Vitis vin   | 12122.2 | 1 |
| Unknown                                                                          | 26.85   | 1 |
| gb CHO_SL022xd02f1.ab1 CHO_SL Nicotiana tabacum cDNA, mRNA sequence [EH6         | 742.07  | 1 |
| Unknown                                                                          | 80.88   | 1 |
| gb AGN_RNC003xl16f1.ab1 AGN_RNC Nicotiana tabacum cDNA 5', mRNA sequenc          | 24.58   | 1 |
| gb Nicotiana tabacum NtSIP1 mRNA for 6b-interacting protein 1, complete cds [ABl | 103.04  | 1 |
| tc Rep: Chromosome chr14 scaffold_27, whole genome shotgun sequence - Vitis vi   | 26.82   | 1 |
| gb KF8C.110N22F.051216T7 KF8 Nicotiana tabacum cDNA clone KF8C.110N22, mRl       | 18.31   | 1 |
| tc Rep: Chromosome chr10 scaffold_76, whole genome shotgun sequence - Vitis vi   | 25.87   | 1 |
| tc Rep: Nt-rab6 protein - Nicotiana tabacum (Common tobacco), complete [TC564€   | 467.28  | 1 |
| gb KF8C.106P01F.051215T7 KF8 Nicotiana tabacum cDNA clone KF8C.106P01, mRN       | 2705.3  | 1 |
| gb KP1B.102P06F.050722T7 KP1B Nicotiana tabacum cDNA clone KP1B.102P06, ml       | 2923.28 | 1 |
| Unknown                                                                          | 118.08  | 1 |
| tc Rep: Chromosome chr18 scaffold_137, whole genome shotgun sequence - Vitis v   | 56.47   | 1 |
| Unknown                                                                          | 6494.96 | 1 |
| gb KP1B.110A06F.050727T7 KP1B Nicotiana tabacum cDNA clone KP1B.110A06, m        | 27.1    | 1 |
| Unknown                                                                          | 1401.56 | 1 |

|                                                                                                 |          |   |
|-------------------------------------------------------------------------------------------------|----------|---|
| Unknown                                                                                         | 251.47   | 1 |
| tc Rep: Chromosome chr5 scaffold_2, whole genome shotgun sequence - Vitis vinifera              | 407.96   | 1 |
| gb AGN_PNL215bf1_f10.trimmed.seq AGN_PNL Nicotiana tabacum cDNA 5', mRNA                        | 37.62    | 1 |
| Unknown                                                                                         | 730.65   | 1 |
| gb KF8C.106C09F.051215T7 KF8 Nicotiana tabacum cDNA clone KF8C.106C09, mRNA                     | 30.17    | 1 |
| tc Rep: Proline-rich protein family-like - Oryza sativa subsp. japonica (Rice), partial (       | 30.94    | 1 |
| gb KF8B.100E05F.051010T7 KF8 Nicotiana tabacum cDNA clone KF8B.100E05, mRNA                     | 58.54    | 1 |
| Unknown                                                                                         | 238.16   | 1 |
| tc Rep: Predicted protein - Physcomitrella patens subsp. patens, complete [TC5517               | 107.12   | 1 |
| tc Rep: Poly(A)-binding protein II-like - Brassica campestris (Field mustard), partial (        | 744.03   | 1 |
| Unknown                                                                                         | 48.69    | 1 |
| tc Rep: Chromosome chr1 scaffold_5, whole genome shotgun sequence - Vitis vinifera              | 528.78   | 1 |
| gb KL4B.101K21F.051103T7 KL4B Nicotiana tabacum cDNA clone KL4B.101K21, mRNA                    | 80.83    | 1 |
| tc Rep: Calnexin-like protein - Solanum lycopersicum (Tomato) (Lycopersicon esculentum)         | 1088.24  | 1 |
| Unknown                                                                                         | 149.49   | 1 |
| tc Rep: Chromosome chr8 scaffold_88, whole genome shotgun sequence - Vitis vinifera             | 30.23    | 1 |
| tc Rep: Sucrose-6-phosphate phosphatase - Nicotiana tabacum (Common tobacco)                    | 116.02   | 1 |
| Unknown                                                                                         | 75.47    | 1 |
| tc Rep: GDP-mannose pyrophosphorylase - Solanum tuberosum (Potato), partial (8                  | 217.14   | 1 |
| Unknown                                                                                         | 253      | 1 |
| gb KF8C.104I02F.051214T7 KF8 Nicotiana tabacum cDNA clone KF8C.104I02, mRNA                     | 11565.85 | 1 |
| Unknown                                                                                         | 52.11    | 1 |
| gb EST_FLW005xi04f1.ab1 EST_FLW Nicotiana tabacum cDNA, mRNA sequence [EFLW005xi04f1]           | 6592.05  | 1 |
| tc Rep: Carotenoid cleavage dioxygenase 1 - Lactuca sativa (Garden lettuce), partial (          | 23.88    | 1 |
| Unknown                                                                                         | 330.23   | 1 |
| Unknown                                                                                         | 22.58    | 1 |
| tc Rep: Striated muscle activator-like protein - Oryza sativa subsp. japonica (Rice), partial ( | 12232.7  | 1 |
| Unknown                                                                                         | 2848.74  | 1 |
| tc Rep: Chromosome chr4 scaffold_6, whole genome shotgun sequence - Vitis vinifera              | 563.54   | 1 |
| Unknown                                                                                         | 758.1    | 1 |
| Unknown                                                                                         | 97.64    | 1 |
| Unknown                                                                                         | 138.78   | 1 |
| gb Nicotiana tabacum NtROS1 mRNA for repressor of silencing 1, complete cds [AB011000]          | 149.35   | 1 |
| gb KL4B.106D03F.051125T7 KL4B Nicotiana tabacum cDNA clone KL4B.106D03, mRNA                    | 1564.64  | 1 |



|                                                                                      |          |   |
|--------------------------------------------------------------------------------------|----------|---|
| Unknown                                                                              | 263.27   | 1 |
| tc Rep: Chromosome undetermined scaffold_257, whole genome shotgun sequenc           | 4735.15  | 1 |
| Unknown                                                                              | 4550.37  | 1 |
| Unknown                                                                              | 560.84   | 1 |
| gb CHO_SL003xc11f1.ab1 CHO_SL Nicotiana tabacum cDNA, mRNA sequence [EH6:            | 17.56    | 1 |
| gb KL4B.109C14F.051106T7 KL4B Nicotiana tabacum cDNA clone KL4B.109C14, mR           | 104.4    | 1 |
| gb TT-04_P08 K326 late senescent leaf library Nicotiana tabacum cDNA, mRNA seq       | 44.37    | 1 |
| gb KP1B.112E21F.060117T7 KP1B Nicotiana tabacum cDNA clone KP1B.112E21, mF           | 1700.43  | 1 |
| Unknown                                                                              | 2650.83  | 1 |
| Unknown                                                                              | 560.57   | 1 |
| gb AGN_RNC014xh16f1.ab1 AGN_RNC Nicotiana tabacum cDNA 5', mRNA sequenc              | 189.14   | 1 |
| tc Rep: NADH glutamate synthase precursor - Phaseolus vulgaris (Kidney bean) (Fre    | 80.6     | 1 |
| Unknown                                                                              | 686.83   | 1 |
| Unknown                                                                              | 42.29    | 1 |
| gb KT7C.110A10F.051221T7 KT7 Nicotiana tabacum cDNA clone KT7C.110A10, mR            | 33.42    | 1 |
| Unknown                                                                              | 37292.75 | 1 |
| gb AGN_RPC005xi10f1.ab1 AGN_RPC Nicotiana tabacum cDNA 5', mRNA sequence             | 183.2    | 1 |
| tc Rep: Lecithine cholesterol acyltransferase-like protein - Solanum lycopersicum (T | 255.02   | 1 |
| gb KR2B.107H19F.051229T7 KR2B Nicotiana tabacum cDNA clone KR2B.107H19, m            | 54.61    | 1 |
| gb KP1B.108A18F.050726T7 KP1B Nicotiana tabacum cDNA clone KP1B.108A18, m            | 121.33   | 1 |
| tc Rep: DnaJ - Viola baoshanensis, partial (95%) [TC46205]                           | 1117.3   | 1 |
| gb BP530317 MAT005 Nicotiana tabacum cDNA clone BY21327, mRNA sequence [E            | 2362.36  | 1 |
| tc Rep: Chromosome chr8 scaffold_68, whole genome shotgun sequence - Vitis vin       | 34.7     | 1 |
| tc Rep: Chromosome chr13 scaffold_286, whole genome shotgun sequence - Vitis v       | 844.54   | 1 |
| gb KT7C.102F22F.051216T7 KT7 Nicotiana tabacum cDNA clone KT7C.102F22, mR            | 86.38    | 1 |
| tc Rep: SRC2-like protein - Nicotiana benthamiana, partial (73%) [TC75258]           | 70.58    | 1 |
| gb CHO_SL010xe03f1.ab1 CHO_SL Nicotiana tabacum cDNA, mRNA sequence [EH6             | 638.75   | 1 |
| tc Rep: NAD-dependent isocitrate dehydrogenase precursor - Nicotiana tabacum (C      | 1578.98  | 1 |
| Unknown                                                                              | 71.6     | 1 |
| Unknown                                                                              | 23824.25 | 1 |
| tc Rep: 40S ribosomal protein S19-like - Solanum tuberosum (Potato), complete [T     | 82.09    | 1 |
| gb KT7C.105I02F.051219T7 KT7 Nicotiana tabacum cDNA clone KT7C.105I02, mRN           | 128.33   | 1 |
| Unknown                                                                              | 264.78   | 1 |
| Unknown                                                                              | 27.8     | 1 |

|                                                                                        |         |   |
|----------------------------------------------------------------------------------------|---------|---|
| gb KF8C.105G15F.051215T7 KF8 Nicotiana tabacum cDNA clone KF8C.105G15, mR              | 248.9   | 1 |
| tc Rep: Chromosome chr4 scaffold_32, whole genome shotgun sequence - Vitis vin         | 113.04  | 1 |
| Unknown                                                                                | 48.04   | 1 |
| tc Rep: Ribosomal protein PETRP - Capsicum annuum (Bell pepper), complete [TC4:        | 29.7    | 1 |
| gb KT7C.110O15F.051221T7 KT7 Nicotiana tabacum cDNA clone KT7C.110O15, mR              | 34.13   | 1 |
| Unknown                                                                                | 16.35   | 1 |
| Unknown                                                                                | 90.55   | 1 |
| tc Rep: Cysteine synthase - Solanum tuberosum (Potato), partial (83%) [TC40893]        | 37.75   | 1 |
| Unknown                                                                                | 97.12   | 1 |
| gb AGN_RNC009xn17f1.ab1 AGN_RNC Nicotiana tabacum cDNA 5', mRNA sequenc                | 17.45   | 1 |
| Unknown                                                                                | 615.83  | 1 |
| gb KL4B.105H09F.051104T7 KL4B Nicotiana tabacum cDNA clone KL4B.105H09, mF             | 190.9   | 1 |
| Unknown                                                                                | 152.83  | 1 |
| gb KP1B.108B17F.050726T7 KP1B Nicotiana tabacum cDNA clone KP1B.108B17, ml             | 63.27   | 1 |
| tc Rep: Nodulin-like protein - Poncirus trifoliata (Hardy orange), partial (4%) [TC734 | 44.59   | 1 |
| Unknown                                                                                | 954.34  | 1 |
| Unknown                                                                                | 114.49  | 1 |
| tc Rep: Nam-like protein 6 - Petunia hybrida (Petunia), partial (86%) [TC66061]        | 78.91   | 1 |
| tc Rep: 14-3-3 i-2 protein - Nicotiana tabacum (Common tobacco), partial (39%) [TC     | 61.52   | 1 |
| Unknown                                                                                | 1096.64 | 1 |
| Unknown                                                                                | 107.15  | 1 |
| tc Rep: Adenylate kinase family-like protein - Solanum tuberosum (Potato), partial     | 3207.46 | 1 |
| gb EST T1P020 Tobacco Leaves Express Library Nicotiana tabacum cDNA clone JS11         | 490.67  | 1 |
| gb KP1B.102G19F.050722T7 KP1B Nicotiana tabacum cDNA clone KP1B.102G19, m              | 215.97  | 1 |
| gb TT-20_L14 Burley21 trichome library Nicotiana tabacum cDNA, mRNA sequence           | 44.49   | 1 |
| tc Rep: Chromosome chr1 scaffold_135, whole genome shotgun sequence - Vitis vi         | 20.82   | 1 |
| tc Rep: Chromosome chr15 scaffold_37, whole genome shotgun sequence - Vitis vi         | 19.53   | 1 |
| gb Nicotiana tabacum alpha-expansin precursor (Nt-EXPA6) mRNA, partial cds [AFC        | 22.51   | 1 |
| Unknown                                                                                | 28.79   | 1 |
| gb KL4B.105D03F.051104T7 KL4B Nicotiana tabacum cDNA clone KL4B.105D03, mF             | 9751.74 | 1 |
| Unknown                                                                                | 50.47   | 1 |
| tc Rep: At2g37480 - Arabidopsis thaliana (Mouse-ear cress), partial (24%) [TC50022     | 1382.16 | 1 |
| tc Rep: Ribosomal protein L41 - Candida maltosa (Yeast), complete [TC51829]            | 134.36  | 1 |
| Unknown                                                                                | 140.12  | 1 |

|                                                                                    |          |   |
|------------------------------------------------------------------------------------|----------|---|
| tc Rep: Inositol-3-phosphate synthase - Nicotiana tabacum (Common tobacco), par    | 114.12   | 1 |
| tc Rep: ATP synthase subunit gamma, mitochondrial precursor - Ipomoea batatas ('   | 226.86   | 1 |
| tc Rep: Ribosomal protein L37 - Glycine max (Soybean), complete [TC56573]          | 106.91   | 1 |
| Unknown                                                                            | 190.27   | 1 |
| tc Rep: Succinyl CoA ligase beta subunit - Solanum lycopersicum (Tomato) (Lycoper  | 486.25   | 1 |
| gb KL5B.111G02F.060117T7 KL5B Nicotiana tabacum cDNA clone KL5B.111G02, mF         | 51.76    | 1 |
| gb KP1B.109D12F.050727T7 KP1B Nicotiana tabacum cDNA clone KP1B.109D12, m          | 79.55    | 1 |
| gb KL4B.105D03F.051104T7 KL4B Nicotiana tabacum cDNA clone KL4B.105D03, mF         | 10628.75 | 1 |
| gb AM811238 seedling library, SL Nicotiana tabacum cDNA clone nt002230064, mF      | 17.83    | 1 |
| gb KF8C.103D08F.051214T7 KF8 Nicotiana tabacum cDNA clone KF8C.103D08, mRI         | 11955.3  | 1 |
| Unknown                                                                            | 112.1    | 1 |
| Unknown                                                                            | 111.25   | 1 |
| gb KG9B.105K03F.051128T7 KG9B Nicotiana tabacum cDNA clone KG9B.105K03, m          | 41.18    | 1 |
| Unknown                                                                            | 510.35   | 1 |
| tc Rep: Chromosome chr19 scaffold_66, whole genome shotgun sequence - Vitis vi     | 141.35   | 1 |
| gb Nicotiana tabacum clone PR33 mRNA sequence [AF154648]                           | 116.63   | 1 |
| tc Rep: Chromosome chr14 scaffold_128, whole genome shotgun sequence - Vitis v     | 2723.61  | 1 |
| tc Rep: ADP ribosylation factor 002 - Daucus carota (Carrot), complete [TC49072]   | 9518.09  | 1 |
| gb AGN_PNL201cf1_e10.trimmed.seq AGN_PNL Nicotiana tabacum cDNA 5', mRN/           | 385.87   | 1 |
| Unknown                                                                            | 3267.79  | 1 |
| Unknown                                                                            | 70.28    | 1 |
| gb KT7C.105B14F.051219T7 KT7 Nicotiana tabacum cDNA clone KT7C.105B14, mRI         | 86.74    | 1 |
| gb KL4B.110F24F.051106T7 KL4B Nicotiana tabacum cDNA clone KL4B.110F24, mR         | 23.49    | 1 |
| tc Rep: T6D22.12 - Arabidopsis thaliana (Mouse-ear cress), partial (54%) [TC51666] | 592.44   | 1 |
| gb KT7C.104L12F.051219T7 KT7 Nicotiana tabacum cDNA clone KT7C.104L12, mRN         | 980.74   | 1 |
| gb KG9B.106O05F.051129T7 KG9B Nicotiana tabacum cDNA clone KG9B.106O05, r          | 1016.01  | 1 |
| Unknown                                                                            | 135.08   | 1 |
| tc Rep: Chromosome chr17 scaffold_16, whole genome shotgun sequence - Vitis vi     | 251.29   | 1 |
| tc Rep: Chromosome chr18 scaffold_1, whole genome shotgun sequence - Vitis vin     | 21.01    | 1 |
| gb AGN_RPC018xg11f1.ab1 AGN_RPC Nicotiana tabacum cDNA 5', mRNA sequence           | 2808.34  | 1 |
| tc Rep: Chromosome chr6 scaffold_3, whole genome shotgun sequence - Vitis vinif    | 231.31   | 1 |
| Unknown                                                                            | 63.69    | 1 |
| gb Nicotiana tabacum pectin methylesterase (PPME1) mRNA, complete cds [AY772       | 45665.5  | 1 |
| Unknown                                                                            | 62.06    | 1 |

|                                                                                      |         |   |
|--------------------------------------------------------------------------------------|---------|---|
| gb KT7C.106G08F.051219T7 KT7 Nicotiana tabacum cDNA clone KT7C.106G08, mRNA          | 605.12  | 1 |
| Unknown                                                                              | 1134.73 | 1 |
| tc Rep: 60S ribosomal protein L6 - Mesembryanthemum crystallinum (Common ice         | 132.1   | 1 |
| Unknown                                                                              | 38.24   | 1 |
| tc Rep: Chromosome chr2 scaffold_11, whole genome shotgun sequence - Vitis vin       | 730.48  | 1 |
| Unknown                                                                              | 30.55   | 1 |
| gb AGN_PNL221ar1_e10.trimmed.seq AGN_PNL Nicotiana tabacum cDNA 3', mRNA             | 402.21  | 1 |
| gb KP1B.001F10F.050628T7 KP1B Nicotiana tabacum cDNA clone KP1B.001F10, mRNA         | 461.83  | 1 |
| gb AGN_PNL232bf1_b2.trimmed.seq AGN_PNL Nicotiana tabacum cDNA 5', mRNA              | 114.81  | 1 |
| gb AGN_RNC008xp03f1.ab1 AGN_RNC Nicotiana tabacum cDNA 5', mRNA sequenc              | 1398.09 | 1 |
| tc Rep: Chromosome chr16 scaffold_10, whole genome shotgun sequence - Vitis vi       | 164.08  | 1 |
| tc Rep: ALG2-interacting protein X - Nicotiana tabacum (Common tobacco), partial     | 135.24  | 1 |
| Unknown                                                                              | 514.55  | 1 |
| Unknown                                                                              | 626.82  | 1 |
| Unknown                                                                              | 43.49   | 1 |
| gb KG9B.005L24F.050721T7 KG9B Nicotiana tabacum cDNA clone KG9B.005L24, mRNA         | 754.3   | 1 |
| gb KG9B.102D21F.051126T7 KG9B Nicotiana tabacum cDNA clone KG9B.102D21, mRNA         | 147.69  | 1 |
| gb TT-34_A21 Burley21 trichome library Nicotiana tabacum cDNA, mRNA sequence         | 34.96   | 1 |
| gb AM787875 COL, cold overnight library Nicotiana tabacum cDNA clone nt006146        | 23.63   | 1 |
| Unknown                                                                              | 47.05   | 1 |
| Unknown                                                                              | 99.83   | 1 |
| gb TT-06_C12 tobacco leaf library Nicotiana tabacum cDNA, mRNA sequence [FG63        | 11366   | 1 |
| tc Rep: ATP synthase subunit beta - Nicotiana sylvestris (Wood tobacco), partial (26 | 821.45  | 1 |
| gb KT7C.105E05F.051219T7 KT7 Nicotiana tabacum cDNA clone KT7C.105E05, mRNA          | 19.81   | 1 |
| tc Rep: Chromosome chr8 scaffold_23, whole genome shotgun sequence - Vitis vin       | 945.92  | 1 |
| gb KT7C.106K21F.051219T7 KT7 Nicotiana tabacum cDNA clone KT7C.106K21, mRNA          | 2399.58 | 1 |
| tc Rep: Chromosome chr7 scaffold_192, whole genome shotgun sequence - Vitis vi       | 127.03  | 1 |
| tc Rep: Cystathionine gamma-synthase isoform 2 - Solanum tuberosum (Potato), p       | 2588.6  | 1 |
| Unknown                                                                              | 158.07  | 1 |
| gb KR3B.106L15F.051109T7 KR3B Nicotiana tabacum cDNA clone KR3B.106L15, mRNA         | 79.48   | 1 |
| tc Rep: Chromosome chr8 scaffold_115, whole genome shotgun sequence - Vitis vi       | 178.35  | 1 |
| tc Rep: Chromosome chr18 scaffold_61, whole genome shotgun sequence - Vitis vi       | 558.21  | 1 |
| tc Rep: Chromosome chr14 scaffold_21, whole genome shotgun sequence - Vitis vi       | 342.79  | 1 |
| gb AGN_PNL226cf1_c12.trimmed.seq AGN_PNL Nicotiana tabacum cDNA 5', mRNA             | 120.8   | 1 |

|                                                                                      |         |   |
|--------------------------------------------------------------------------------------|---------|---|
| gb KN6B.101N24F.051230T7 KN6B Nicotiana tabacum cDNA clone KN6B.101N24, r            | 691.72  | 1 |
| Unknown                                                                              | 30.84   | 1 |
| Unknown                                                                              | 50.79   | 1 |
| Unknown                                                                              | 2902.1  | 1 |
| gb KF8B.200N17F.060120T7 KF8 Nicotiana tabacum cDNA clone KF8B.200N17, mR            | 26.21   | 1 |
| tc Rep: WSSV375 - White spot syndrome virus (WSSV), partial (25%) [TC76905]          | 34.58   | 1 |
| gb TT-47_B22 Samsun trichome library Nicotiana tabacum cDNA, mRNA sequence           | 18.9    | 1 |
| gb AM803975 seedling library, SL Nicotiana tabacum cDNA clone nt002191015, mF        | 21.93   | 1 |
| gb AGN_PNL225br1_g2.trimmed.seq AGN_PNL Nicotiana tabacum cDNA 3', mRNA              | 236.64  | 1 |
| Unknown                                                                              | 31.89   | 1 |
| gb EST_FLW002xp11f1.ab1 EST_FLW Nicotiana tabacum cDNA, mRNA sequence [E             | 1590.09 | 1 |
| tc Rep: Chromosome chr3 scaffold_8, whole genome shotgun sequence - Vitis vinif      | 122.84  | 1 |
| gb KP1B.108H13F.050726T7 KP1B Nicotiana tabacum cDNA clone KP1B.108H13, m            | 134.87  | 1 |
| gb KP1B.001C10F.050628T7 KP1B Nicotiana tabacum cDNA clone KP1B.001C10, mI           | 64.2    | 1 |
| gb AGN_RNC127xb20f1.ab1 AGN_RNC Nicotiana tabacum cDNA 5', mRNA sequenc              | 1572.93 | 1 |
| tc Rep: Chromosome chr16 scaffold_10, whole genome shotgun sequence - Vitis vi       | 1815.85 | 1 |
| Unknown                                                                              | 59.62   | 1 |
| gb AGN_ELP008xp13f1.ab1 AGN_ELP Nicotiana tabacum cDNA 5', mRNA sequence             | 61.48   | 1 |
| gb KP1B.101A13F.050722T7 KP1B Nicotiana tabacum cDNA clone KP1B.101A13, m            | 104.26  | 1 |
| gb CHO_SL025xj11f1.ab1 CHO_SL Nicotiana tabacum cDNA, mRNA sequence [EH62            | 2808.66 | 1 |
| tc Rep: Chromosome chr11 scaffold_13, whole genome shotgun sequence - Vitis vi       | 274.9   | 1 |
| tc Rep: Chloroplast threonine deaminase 1 - Solanum lycopersicum (Tomato) (Lyc       | 530.82  | 1 |
| Unknown                                                                              | 18.69   | 1 |
| gb FS417555 normalized full-length tobacco cDNA library Nicotiana tabacum cDNA       | 523.39  | 1 |
| gb KL4B.108H18F.051105T7 KL4B Nicotiana tabacum cDNA clone KL4B.108H18, mF           | 59.99   | 1 |
| gb AGN_RPC014xo22f1.ab1 AGN_RPC Nicotiana tabacum cDNA 5', mRNA sequenc              | 781.04  | 1 |
| tc Rep: VAP27 - Nicotiana plumbaginifolia (Leadwort-leaved tobacco), partial (96%)   | 375.45  | 1 |
| tc Rep: Cellulose synthase catalytic subunit - Nicotiana alata (Winged tobacco) (Per | 53.86   | 1 |
| gb KP1B.110I21F.050727T7 KP1B Nicotiana tabacum cDNA clone KP1B.110I21, mR           | 220.14  | 1 |
| gb KF8B.200D19F.060120T7 KF8 Nicotiana tabacum cDNA clone KF8B.200D19, mR            | 752.88  | 1 |
| tc Rep: Pyridoxal kinase - Solanum tuberosum (Potato), partial (33%) [TC65370]       | 684.25  | 1 |
| Unknown                                                                              | 103.96  | 1 |
| Unknown                                                                              | 377.76  | 1 |
| tc Rep: Aquaporin 1 - Nicotiana tabacum (Common tobacco), complete [TC63014]         | 628.1   | 1 |

|                                                                                    |          |   |
|------------------------------------------------------------------------------------|----------|---|
| Unknown                                                                            | 433.62   | 1 |
| tc Rep: Chromosome chr13 scaffold_48, whole genome shotgun sequence - Vitis vi     | 525.54   | 1 |
| Unknown                                                                            | 229.52   | 1 |
| Unknown                                                                            | 508.96   | 1 |
| gb KN6B.100E12F.051019T7 KN6B Nicotiana tabacum cDNA clone KN6B.100E12, m          | 24.96    | 1 |
| tc Rep: Chromosome chr11 scaffold_13, whole genome shotgun sequence - Vitis vi     | 95.32    | 1 |
| tc Rep: Chromosome undetermined scaffold_226, whole genome shotgun sequenc         | 1347.1   | 1 |
| tc Rep: Chromosome chr4 scaffold_6, whole genome shotgun sequence - Vitis vinif    | 571.47   | 1 |
| Unknown                                                                            | 176.28   | 1 |
| gb KP1B.107M11F.050726T7 KP1B Nicotiana tabacum cDNA clone KP1B.107M11, r          | 207.21   | 1 |
| Unknown                                                                            | 53.98    | 1 |
| gb AGN_RNC021xo20f1.ab1 AGN_RNC Nicotiana tabacum cDNA 5', mRNA sequenc            | 48.35    | 1 |
| gb KT7C.113A13F.051221T7 KT7 Nicotiana tabacum cDNA clone KT7C.113A13, mRI         | 212.04   | 1 |
| tc Rep: Thaliana 60S ribosomal protein L7 - Solanum tuberosum (Potato), complete   | 29.3     | 1 |
| Unknown                                                                            | 67.89    | 1 |
| gb Nicotiana tabacum NtFAD3 mRNA for microsomal omega-3 acid desaturase, cor       | 17212.35 | 1 |
| gb KG9B.001P18F.050628T7 KG9B Nicotiana tabacum cDNA clone KG9B.001P18, m          | 20.47    | 1 |
| gb CHO_SL025xj11f1.ab1 CHO_SL Nicotiana tabacum cDNA, mRNA sequence [EH62          | 2262.74  | 1 |
| gb AGN_ELP006xj06f1.ab1 AGN_ELP Nicotiana tabacum cDNA 5', mRNA sequence           | 28.77    | 1 |
| tc Rep: Chromosome chr3 scaffold_117, whole genome shotgun sequence - Vitis vi     | 349.37   | 1 |
| tc Rep: Homolog of defender against apoptotic death 1 homolog - Nicotiana suave    | 256.64   | 1 |
| tc Rep: GDP-D-mannose pyrophosphorylase - Viola baoshanensis, partial (48%) [TC    | 183.35   | 1 |
| gb Nicotiana tabacum putative high mobility group protein 2-like mRNA, partial sec | 3238.75  | 1 |
| tc Rep: Salt-induced AAA-Type ATPase - Mesembryanthemum crystallinum (Comm         | 1010.8   | 1 |
| gb BP532403 MAT005 Nicotiana tabacum cDNA clone BY27199, mRNA sequence [E          | 232.42   | 1 |
| tc Rep: Chromosome undetermined scaffold_69, whole genome shotgun sequence         | 4547.28  | 1 |
| gb KT7B.107P03F.060124T7 KT7 Nicotiana tabacum cDNA clone KT7B.107P03, mRI         | 50.97    | 1 |
| Unknown                                                                            | 117.14   | 1 |
| Unknown                                                                            | 27.21    | 1 |
| gb Nicotiana tabacum EF-1-alpha-related GTP-binding protein (SUP1) mRNA, comp      | 23.64    | 1 |
| Unknown                                                                            | 105.13   | 1 |
| Unknown                                                                            | 175.28   | 1 |
| Unknown                                                                            | 207.09   | 1 |
| tc Rep: Chromosome chr6 scaffold_3, whole genome shotgun sequence - Vitis vinif    | 2865.07  | 1 |

|                                                                                         |         |   |
|-----------------------------------------------------------------------------------------|---------|---|
| Unknown                                                                                 | 3088.26 | 1 |
| gb TT-06_B02 Samsun trichome library Nicotiana tabacum cDNA, mRNA sequence              | 445.49  | 1 |
| tc Rep: Cytosine-specific methyltransferase - Vitis vinifera (Grape), partial (20%) [TC | 32.95   | 1 |
| Unknown                                                                                 | 66.61   | 1 |
| Unknown                                                                                 | 37.74   | 1 |
| tc Rep: Tryptophan synthase beta subunit - Persicaria tinctoria, partial (83%) [TC49    | 2419.52 | 1 |
| gb KF8C.104F15F.051214T7 KF8 Nicotiana tabacum cDNA clone KF8C.104F15, mRN              | 24.86   | 1 |
| gb KR3B.114O14F.060119T7 KR3B Nicotiana tabacum cDNA clone KR3B.114O14, m               | 127.81  | 1 |
| Unknown                                                                                 | 255.26  | 1 |
| gb TT-29_C09 K326 trichome library Nicotiana tabacum cDNA, mRNA sequence [FC            | 76.65   | 1 |
| gb KP1B.101B11F.050722T7 KP1B Nicotiana tabacum cDNA clone KP1B.101B11, m               | 777.23  | 1 |
| gb KT7B.107J11F.060124T7 KT7 Nicotiana tabacum cDNA clone KT7B.107J11, mRN              | 524.47  | 1 |
| gb KT7C.112F07F.051221T7 KT7 Nicotiana tabacum cDNA clone KT7C.112F07, mRN              | 1851.95 | 1 |
| gb AGN_RNC017xb07f1.ab1 AGN_RNC Nicotiana tabacum cDNA 5', mRNA sequenc                 | 43.67   | 1 |
| Unknown                                                                                 | 65.29   | 1 |
| tc Rep: ALY protein - Nicotiana benthamiana, partial (20%) [TC72720]                    | 2315.46 | 1 |
| gb KG9B.001A24F.050628T7 KG9B Nicotiana tabacum cDNA clone KG9B.001A24, n               | 145.22  | 1 |
| Unknown                                                                                 | 227.14  | 1 |
| gb KG9B.106J11F.051129T7 KG9B Nicotiana tabacum cDNA clone KG9B.106J11, m               | 107.11  | 1 |
| tc Rep: CBL-interacting protein kinase 25 - Populus trichocarpa (Western balsam pc      | 534.58  | 1 |
| tc Rep: Chromosome chr10 scaffold_179, whole genome shotgun sequence - Vitis \          | 212.47  | 1 |
| tc Rep: Chromosome chr1 scaffold_5, whole genome shotgun sequence - Vitis vinif         | 4586.26 | 1 |
| Unknown                                                                                 | 31.26   | 1 |
| tc Rep: Succinate dehydrogenase subunit 3 - Solanum lycopersicum (Tomato) (Lyco         | 2655.38 | 1 |
| Unknown                                                                                 | 1141    | 1 |
| gb Nicotiana tabacum cDNA-AFLP-fragment BSTT24-2-320, cultivar Bright Yellow 2          | 175.43  | 1 |
| gb KF8C.108F01F.051215T7 KF8 Nicotiana tabacum cDNA clone KF8C.108F01, mRN              | 21.48   | 1 |
| gb KF8C.101N16F.051214T7 KF8 Nicotiana tabacum cDNA clone KF8C.101N16, mRI              | 23.37   | 1 |
| gb TT-24_N22 Samsun trichome library Nicotiana tabacum cDNA, mRNA sequence              | 240.44  | 1 |
| Unknown                                                                                 | 731.15  | 1 |
| gb KR2B.002O22F.051019T7 KR2B Nicotiana tabacum cDNA clone KR2B.002O22, m               | 8412.54 | 1 |
| tc Rep: Predicted protein - Aspergillus terreus (strain NIH 2624), partial (10%) [TC5   | 29.32   | 1 |
| tc Rep: Os06g0661900 protein - Oryza sativa subsp. japonica (Rice), partial (26%) [T    | 1287.34 | 1 |
| tc Rep: Chromosome undetermined scaffold_438, whole genome shotgun sequenc              | 44.5    | 1 |

|                                                                                     |         |   |
|-------------------------------------------------------------------------------------|---------|---|
| gb TT-17_E04 Burley21 trichome library Nicotiana tabacum cDNA, mRNA sequence        | 4194.22 | 1 |
| tc Rep: Chromosome chr11 scaffold_13, whole genome shotgun sequence - Vitis vi      | 25.46   | 1 |
| tc Rep: Ribosomal protein L15 - Vitis vinifera (Grape), partial (60%) [TC52772]     | 169.88  | 1 |
| tc Rep: Chromosome undetermined scaffold_133, whole genome shotgun sequenc          | 1123.09 | 1 |
| tc Rep: Glycoprotein-like protein - Solanum tuberosum (Potato), partial (55%) [TC6  | 39.87   | 1 |
| gb KP1B.037G15F.050623T7 KP1B Nicotiana tabacum cDNA clone KP1B.037G15, m           | 80.51   | 1 |
| Unknown                                                                             | 18.62   | 1 |
| tc Rep: DNA-binding protein - Nicotiana tabacum (Common tobacco), complete [TC      | 243.13  | 1 |
| tc Rep: Chromosome chr13 scaffold_74, whole genome shotgun sequence - Vitis vi      | 1537.18 | 1 |
| gb AGN_RNC011xb17f1.ab1 AGN_RNC Nicotiana tabacum cDNA 5', mRNA sequenc             | 509.01  | 1 |
| tc Rep: Chromosome chr9 scaffold_90, whole genome shotgun sequence - Vitis vin      | 708.25  | 1 |
| tc Rep: Pectate lyase precursor - Nicotiana tabacum (Common tobacco), complete      | 73262.2 | 1 |
| tc Rep: Histone H4 [Contains: Osteogenic growth peptide (OGP)]. - Rattus norvegici  | 204.29  | 1 |
| tc Rep: Chromosome undetermined scaffold_142, whole genome shotgun sequenc          | 33.31   | 1 |
| tc Rep: Water channel protein - Nicotiana excelsior, complete [TC40230]             | 27.13   | 1 |
| gb KP1B.110K12F.050727T7 KP1B Nicotiana tabacum cDNA clone KP1B.110K12, mI          | 58.23   | 1 |
| gb AGN_RNC020xh17f1.ab1 AGN_RNC Nicotiana tabacum cDNA 5', mRNA sequenc             | 64.14   | 1 |
| Unknown                                                                             | 345.98  | 1 |
| gb Nicotiana tabacum NtGPD L mRNA for putative glycerophosphoryl diester phosp      | 1061.26 | 1 |
| Unknown                                                                             | 102.62  | 1 |
| Unknown                                                                             | 405.73  | 1 |
| gb AGN_RNC023xg21f1.ab1 AGN_RNC Nicotiana tabacum cDNA 5', mRNA sequenc             | 22.75   | 1 |
| Unknown                                                                             | 256.81  | 1 |
| gb KL4B.102J02F.051125T7 KL4B Nicotiana tabacum cDNA clone KL4B.102J02, mRN         | 1104.05 | 1 |
| Unknown                                                                             | 36.03   | 1 |
| gb KP1B.104L05F.050725T7 KP1B Nicotiana tabacum cDNA clone KP1B.104L05, mR          | 253.43  | 1 |
| tc Rep: Chromosome chr12 scaffold_38, whole genome shotgun sequence - Vitis vi      | 184.76  | 1 |
| Unknown                                                                             | 828.82  | 1 |
| tc Rep: 60S ribosomal protein L41 - Homo sapiens (Human), complete [TC65131]        | 7587.38 | 1 |
| Unknown                                                                             | 351.72  | 1 |
| tc Rep: Chromosome chr4 scaffold_6, whole genome shotgun sequence - Vitis vinif     | 235.48  | 1 |
| gb BP534288 MAT005 Nicotiana tabacum cDNA clone BY32245, mRNA sequence [E           | 185.17  | 1 |
| tc Rep: Chromosome chr18 scaffold_1, whole genome shotgun sequence - Vitis vin      | 1003.64 | 1 |
| tc Rep: Zinc finger, RING-type; Thioredoxin-related - Medicago truncatula (Barrel m | 18.22   | 1 |



|                                                                                      |          |   |
|--------------------------------------------------------------------------------------|----------|---|
| Unknown                                                                              | 20689.8  | 1 |
| tc Rep: Proline-rich protein - Solanum tuberosum (Potato), partial (66%) [TC64223]   | 51.54    | 1 |
| gb AGN_PNL229cf1_a7.trimmed.seq AGN_PNL Nicotiana tabacum cDNA 5', mRNA              | 386.37   | 1 |
| tc Rep: Phosphoenolpyruvate carboxykinase - Solanum lycopersicum (Tomato) (Lyc       | 32.91    | 1 |
| tc Rep: Chromosome chr13 scaffold_17, whole genome shotgun sequence - Vitis vi       | 73.59    | 1 |
| tc Rep: Chromosome chr7 scaffold_44, whole genome shotgun sequence - Vitis vin       | 454.09   | 1 |
| gb TT-35_B11 K326 early senescent leaf library Nicotiana tabacum cDNA, mRNA se       | 136.85   | 1 |
| Unknown                                                                              | 135.42   | 1 |
| Unknown                                                                              | 34.25    | 1 |
| tc Rep: Chromosome chr12 scaffold_18, whole genome shotgun sequence - Vitis vi       | 31.16    | 1 |
| gb KL4B.101F22F.051103T7 KL4B Nicotiana tabacum cDNA clone KL4B.101F22, mR           | 113.2    | 1 |
| gb KN6B.105M14F.060104T7 KN6B Nicotiana tabacum cDNA clone KN6B.105M14,              | 246.77   | 1 |
| tc Rep: Chromosome chr9 scaffold_7, whole genome shotgun sequence - Vitis vinif      | 449.94   | 1 |
| Unknown                                                                              | 25.31    | 1 |
| Unknown                                                                              | 85.76    | 1 |
| Unknown                                                                              | 18.6     | 1 |
| tc Rep: Chromosome chr2 scaffold_11, whole genome shotgun sequence - Vitis vin       | 438.91   | 1 |
| tc Rep: Chromosome chr4 scaffold_6, whole genome shotgun sequence - Vitis vinif      | 264.46   | 1 |
| tc Rep: Ubiquitin-conjugating enzyme family protein-like protein - Solanum tubero:   | 492.51   | 1 |
| Unknown                                                                              | 778.99   | 1 |
| tc Rep: Chromosome undetermined scaffold_77, whole genome shotgun sequence           | 48.94    | 1 |
| Unknown                                                                              | 2678.79  | 1 |
| gb KL4B.102A16F.051125T7 KL4B Nicotiana tabacum cDNA clone KL4B.102A16, mF           | 10972.75 | 1 |
| gb BP134254 MAT001 Nicotiana tabacum cDNA clone BY6612, mRNA sequence [BF            | 56.36    | 1 |
| tc Rep: Os01g0950800 protein - Oryza sativa subsp. japonica (Rice), partial (30%) [T | 516.69   | 1 |
| gb KN6B.105P14F.060104T7 KN6B Nicotiana tabacum cDNA clone KN6B.105P14, r            | 325.68   | 1 |
| gb KG9B.105A19F.051128T7 KG9B Nicotiana tabacum cDNA clone KG9B.105A19, n            | 1742.17  | 1 |
| Unknown                                                                              | 26.22    | 1 |
| gb KG9B.107B04F.060120T7 KG9B Nicotiana tabacum cDNA clone KG9B.107B04, r            | 23.41    | 1 |
| Unknown                                                                              | 545.58   | 1 |
| tc Rep: Chromosome undetermined scaffold_79, whole genome shotgun sequence           | 41.9     | 1 |
| tc Rep: Chromosome chr19 scaffold_111, whole genome shotgun sequence - Vitis v       | 51.2     | 1 |
| gb BP128766 MAT001 Nicotiana tabacum cDNA clone BY549, mRNA sequence [BP:            | 70.68    | 1 |
| gb KP1B.103B19F.050725T7 KP1B Nicotiana tabacum cDNA clone KP1B.103B19, ml           | 65       | 1 |

|                                                                                                         |         |   |
|---------------------------------------------------------------------------------------------------------|---------|---|
| gb TT-23_L09 K326 late senescent leaf library <i>Nicotiana tabacum</i> cDNA, mRNA seq                   | 39.23   | 1 |
| gb KG9B.105A02F.051128T7 KG9B <i>Nicotiana tabacum</i> cDNA clone KG9B.105A02, n                        | 263.74  | 1 |
| gb 3C05 Transformed tobacco Lambda Zap II library <i>Nicotiana tabacum</i> cDNA 5', m                   | 3372.33 | 1 |
| gb KR3B.101B15F.051107T7 KR3B <i>Nicotiana tabacum</i> cDNA clone KR3B.101B15, m                        | 94.12   | 1 |
| tc Rep: Chromosome chr12 scaffold_47, whole genome shotgun sequence - <i>Vitis vi</i>                   | 98.42   | 1 |
| tc Rep: Chromosome chr4 scaffold_333, whole genome shotgun sequence - <i>Vitis vi</i>                   | 25.72   | 1 |
| tc Rep: Chromosome chr4 scaffold_6, whole genome shotgun sequence - <i>Vitis vinif</i>                  | 135.5   | 1 |
| tc Rep: Chromosome chr17 scaffold_16, whole genome shotgun sequence - <i>Vitis vi</i>                   | 49.75   | 1 |
| Unknown                                                                                                 | 34.72   | 1 |
| Unknown                                                                                                 | 154.52  | 1 |
| tc Rep: ATPase - <i>Camellia sinensis</i> (Tea), complete [TC71603]                                     | 700.71  | 1 |
| Unknown                                                                                                 | 513.79  | 1 |
| Unknown                                                                                                 | 31.59   | 1 |
| gb AGN_RPC012xf15f1.ab1 AGN_RPC <i>Nicotiana tabacum</i> cDNA 5', mRNA sequence                         | 121.53  | 1 |
| tc Rep: 60S ribosomal protein L15 - <i>Petunia hybrida</i> ( <i>Petunia</i> ), complete [TC41795]       | 145.28  | 1 |
| gb AM794030 COL, cold overnight library <i>Nicotiana tabacum</i> cDNA clone nt006077                    | 22.88   | 1 |
| gb KP1B.105G14F.060116T7 KP1B <i>Nicotiana tabacum</i> cDNA clone KP1B.105G14, m                        | 72.34   | 1 |
| gb BP132658 MAT001 <i>Nicotiana tabacum</i> cDNA clone BY4846, mRNA sequence [BF                        | 58.6    | 1 |
| Unknown                                                                                                 | 33.24   | 1 |
| tc Rep: Malate dehydrogenase, glyoxysomal precursor - <i>Citrullus lanatus</i> ( <i>Waterme</i>         | 250.25  | 1 |
| tc Rep: Chromosome chr14 scaffold_21, whole genome shotgun sequence - <i>Vitis vi</i>                   | 34.91   | 1 |
| Unknown                                                                                                 | 148.73  | 1 |
| gb  <i>Nicotiana tabacum</i> mRNA for proteasome A-type subunit [Y16644]                                | 184.61  | 1 |
| tc Rep: Predicted protein - <i>Physcomitrella patens</i> subsp. <i>patens</i> , partial (63%) [TC5:     | 26.57   | 1 |
| Unknown                                                                                                 | 572.42  | 1 |
| Unknown                                                                                                 | 30.41   | 1 |
| Unknown                                                                                                 | 86.91   | 1 |
| Unknown                                                                                                 | 18396.7 | 1 |
| tc Rep: Sucrose synthase - <i>Solanum lycopersicum</i> ( <i>Tomato</i> ) ( <i>Lycopersicon esculent</i> | 375.79  | 1 |
| Unknown                                                                                                 | 256.59  | 1 |
| Unknown                                                                                                 | 57.82   | 1 |
| tc Rep: Chromosome chr16 scaffold_10, whole genome shotgun sequence - <i>Vitis vi</i>                   | 124.72  | 1 |
| gb KN6B.110L17F.060106T7 KN6B <i>Nicotiana tabacum</i> cDNA clone KN6B.110L17, m                        | 19217.6 | 1 |
| gb KP1B.109O08F.050727T7 KP1B <i>Nicotiana tabacum</i> cDNA clone KP1B.109O08, m                        | 110.44  | 1 |

|                                                                                      |         |   |
|--------------------------------------------------------------------------------------|---------|---|
| Unknown                                                                              | 28.66   | 1 |
| tc Rep: Chromosome chr15 scaffold_40, whole genome shotgun sequence - Vitis vi       | 122.84  | 1 |
| gb KL5B.104B08F.060207T7 KL5B Nicotiana tabacum cDNA clone KL5B.104B08, mR           | 143.43  | 1 |
| Unknown                                                                              | 26.56   | 1 |
| Unknown                                                                              | 444.93  | 1 |
| tc Rep: Predicted protein - Chlamydomonas reinhardtii, partial (9%) [TC69281]        | 367.15  | 1 |
| tc Rep: Anionic peroxidase swpb1 - Ipomoea batatas (Sweet potato) (Batate), parti:   | 272.65  | 1 |
| Unknown                                                                              | 29.59   | 1 |
| gb KF8C.104H20F.051214T7 KF8 Nicotiana tabacum cDNA clone KF8C.104H20, mRI           | 19.01   | 1 |
| gb TT-50_L03 Samsun trichome library Nicotiana tabacum cDNA, mRNA sequence [         | 24.51   | 1 |
| Unknown                                                                              | 434.74  | 1 |
| tc Rep: Flavin reductase domain protein, FMN-binding - Arthrobacter sp. (strain FB:  | 31.31   | 1 |
| gb KL4B.107K22F.051126T7 KL4B Nicotiana tabacum cDNA clone KL4B.107K22, mR           | 23.28   | 1 |
| tc Rep: Chromosome chr18 scaffold_1, whole genome shotgun sequence - Vitis vin       | 458.83  | 1 |
| tc Rep: Chromosome chr5 scaffold_64, whole genome shotgun sequence - Vitis vin       | 223.98  | 1 |
| Unknown                                                                              | 90.92   | 1 |
| gb FS435766 normalized full-length tobacco cDNA library Nicotiana tabacum cDNA       | 21.66   | 1 |
| Unknown                                                                              | 125.34  | 1 |
| Unknown                                                                              | 86.22   | 1 |
| gb TT-20_D22 Burley21 trichome library Nicotiana tabacum cDNA, mRNA sequence         | 1203.52 | 1 |
| Unknown                                                                              | 24.76   | 1 |
| Unknown                                                                              | 477.54  | 1 |
| Unknown                                                                              | 224.28  | 1 |
| gb KL4B.103E08F.051103T7 KL4B Nicotiana tabacum cDNA clone KL4B.103E08, mR           | 83.1    | 1 |
| tc Rep: Os03g0254900 protein - Oryza sativa subsp. japonica (Rice), partial (62%) [T | 7544.73 | 1 |
| tc Rep: WD domain protein-like - Arabidopsis thaliana (Mouse-ear cress), partial (3: | 192.2   | 1 |
| Unknown                                                                              | 19.6    | 1 |
| tc Rep: Chromosome undetermined scaffold_3112, whole genome shotgun sequen           | 27.61   | 1 |
| Unknown                                                                              | 167.28  | 1 |
| tc Rep: Bypass1 - Nicotiana benthamiana, partial (61%) [TC44015]                     | 1562.92 | 1 |
| gb CHO_SL023xo07f1.ab1 CHO_SL Nicotiana tabacum cDNA, mRNA sequence [EH6             | 231.1   | 1 |
| tc Rep: 60S ribosomal protein L34 - Nicotiana tabacum (Common tobacco), comple       | 236.99  | 1 |
| tc Rep: Chromosome chr19 scaffold_4, whole genome shotgun sequence - Vitis vin       | 249.78  | 1 |
| gb TT-03_B19 Samsun trichome library Nicotiana tabacum cDNA, mRNA sequence           | 477.26  | 1 |

|                                                                                        |         |   |
|----------------------------------------------------------------------------------------|---------|---|
| gb KN6B.009J12F.050901T7 KN6B Nicotiana tabacum cDNA clone KN6B.009J12, mI             | 633.01  | 1 |
| Unknown                                                                                | 94.14   | 1 |
| tc Rep: ATP citrate lyase alpha subunit - Glycyrrhiza uralensis, partial (38%) [TC4144 | 20.25   | 1 |
| tc Rep: K+ potassium transporter - Limnobacter sp. MED105, partial (3%) [TC60498       | 129     | 1 |
| gb TT-19_B02 Burley21 trichome library Nicotiana tabacum cDNA, mRNA sequence           | 67.54   | 1 |
| gb Nicotiana tabacum chloroplast pigment-binding protein CP29 (Lhcb4) mRNA, co         | 291.08  | 1 |
| Unknown                                                                                | 23.01   | 1 |
| gb TT-12_A08 Samsun trichome library Nicotiana tabacum cDNA, mRNA sequence             | 513.92  | 1 |
| gb KP1B.105M23F.060116T7 KP1B Nicotiana tabacum cDNA clone KP1B.105M23, r              | 476.87  | 1 |
| tc Rep: Chromosome chr13 scaffold_17, whole genome shotgun sequence - Vitis vi         | 27.38   | 1 |
| gb KF8C.104H02F.051214T7 KF8 Nicotiana tabacum cDNA clone KF8C.104H02, mRI             | 68.75   | 1 |
| gb AGN_RPC009xd19f1.ab1 AGN_RPC Nicotiana tabacum cDNA 5', mRNA sequenc                | 63.85   | 1 |
| tc Rep: Proton/glutamate symporter - Salinibacter ruber (strain DSM 13855), partia     | 71.12   | 1 |
| gb KT7B.100K02F.051010T7 KT7 Nicotiana tabacum cDNA clone KT7B.100K02, mRI             | 323.52  | 1 |
| Unknown                                                                                | 577.61  | 1 |
| Unknown                                                                                | 52.24   | 1 |
| gb KP1B.108C22F.050726T7 KP1B Nicotiana tabacum cDNA clone KP1B.108C22, mI             | 345.8   | 1 |
| tc Rep: Ferritin-1, chloroplast precursor - Nicotiana tabacum (Common tobacco), c      | 571.57  | 1 |
| Unknown                                                                                | 85.84   | 1 |
| tc Rep: Chromosome chr2 scaffold_132, whole genome shotgun sequence - Vitis vi         | 34.39   | 1 |
| Unknown                                                                                | 441.25  | 1 |
| tc Rep: Predicted protein - Monosiga brevicollis MX1, partial (5%) [TC67653]           | 474.26  | 1 |
| Unknown                                                                                | 1143.24 | 1 |
| gb KG9B.101K13F.060120T7 KG9B Nicotiana tabacum cDNA clone KG9B.101K13, m              | 274.95  | 1 |
| gb EST_YP003xp04f1.ab1 EST_YP Nicotiana tabacum cDNA, mRNA sequence [EH61              | 176.02  | 1 |
| gb AGN_RNC021xf17f1.ab1 AGN_RNC Nicotiana tabacum cDNA 5', mRNA sequenc                | 71.21   | 1 |
| tc Rep: Uncharacterized protein At5g09230.6 - Arabidopsis thaliana (Mouse-ear cre      | 115.51  | 1 |
| Unknown                                                                                | 235.83  | 1 |
| tc Rep: Chromosome chr6 scaffold_3, whole genome shotgun sequence - Vitis vinif        | 29.28   | 1 |
| gb KF8C.103F17F.051214T7 KF8 Nicotiana tabacum cDNA clone KF8C.103F17, mRN             | 137.14  | 1 |
| Unknown                                                                                | 630.25  | 1 |
| gb KG9B.001E11F.050628T7 KG9B Nicotiana tabacum cDNA clone KG9B.001E11, m              | 563.14  | 1 |
| gb KP1B.101L10F.050722T7 KP1B Nicotiana tabacum cDNA clone KP1B.101L10, mF             | 1176.76 | 1 |
| gb CHO_SL003xa08f1.ab1 CHO_SL Nicotiana tabacum cDNA, mRNA sequence [EH6               | 7628.77 | 1 |

|                                                                                       |         |   |
|---------------------------------------------------------------------------------------|---------|---|
| gb BP532057 MAT005 Nicotiana tabacum cDNA clone BY26222, mRNA sequence [E             | 26.97   | 1 |
| tc Rep: Arabidopsis thaliana genomic DNA, chromosome 5, TAC clone:K9D7 - Arabi        | 280.1   | 1 |
| tc Rep: Chromosome chr16 scaffold_94, whole genome shotgun sequence - Vitis vi        | 939.09  | 1 |
| Unknown                                                                               | 69.7    | 1 |
| Unknown                                                                               | 447.22  | 1 |
| Unknown                                                                               | 863.23  | 1 |
| Unknown                                                                               | 86.41   | 1 |
| tc Rep: Protein transport protein SEC61 subunit gamma - Oryza sativa subsp. japon     | 1181.35 | 1 |
| tc Rep: Chromosome chr3 scaffold_95, whole genome shotgun sequence - Vitis vin        | 482.6   | 1 |
| Unknown                                                                               | 220.2   | 1 |
| gb AM812473 seedling library, SL Nicotiana tabacum cDNA clone nt002287006, mF         | 144.3   | 1 |
| gb Nicotiana tabacum NtWAF mRNA for hypothetical protein, complete cds [AB084         | 32.37   | 1 |
| gb TT-36_O24 Samsun trichome library Nicotiana tabacum cDNA, mRNA sequence            | 19.15   | 1 |
| tc Rep: Nudix hydrolase 17, mitochondrial precursor - Arabidopsis thaliana (Mouse     | 923.17  | 1 |
| tc Rep: Integral membrane protein - Leifsonia xyli subsp. xyli, partial (7%) [TC57723 | 238.32  | 1 |
| gb CHO_SL007xf08f1.ab1 CHO_SL Nicotiana tabacum cDNA, mRNA sequence [EH62             | 3317.35 | 1 |
| tc Rep: Eukaryotic initiation factor 4A-6 - Nicotiana tabacum (Common tobacco), p     | 815.72  | 1 |
| tc Rep: Chromosome chr13 scaffold_48, whole genome shotgun sequence - Vitis vi        | 195.18  | 1 |
| tc Rep: Mitochondrial carrier-like protein - Solanum tuberosum (Potato), partial (54  | 59.84   | 1 |
| Unknown                                                                               | 48.17   | 1 |
| Unknown                                                                               | 18.93   | 1 |
| gb KT7B.103C07F.060124T7 KT7 Nicotiana tabacum cDNA clone KT7B.103C07, mRI            | 2463.56 | 1 |
| tc Rep: Mitochondrial F1-ATPase gamma subunit - Ipomoea nil (Japanese morning i       | 1392.6  | 1 |
| gb KP1B.101L08F.050722T7 KP1B Nicotiana tabacum cDNA clone KP1B.101L08, mF            | 3240.41 | 1 |
| gb KG9B.105O10F.051128T7 KG9B Nicotiana tabacum cDNA clone KG9B.105O10, r             | 1113.12 | 1 |
| gb KT7C.109M16F.051221T7 KT7 Nicotiana tabacum cDNA clone KT7C.109M16, ml             | 515.51  | 1 |
| Unknown                                                                               | 189.44  | 1 |
| Unknown                                                                               | 92.51   | 1 |
| Unknown                                                                               | 24.49   | 1 |
| gb AGN_RNC007xg14f1.ab1 AGN_RNC Nicotiana tabacum cDNA 5', mRNA sequenc               | 223.95  | 1 |
| gb N.tabacum Nelf-4A11 mRNA [X79136]                                                  | 219.87  | 1 |
| gb TT-07_E11 K326 early senescent leaf library Nicotiana tabacum cDNA, mRNA ser       | 132.46  | 1 |
| tc Rep: Chromosome 15 contig 1, DNA sequence - Ostreococcus tauri, partial (30%)      | 101.63  | 1 |
| Unknown                                                                               | 18.56   | 1 |

|                                                                                     |         |   |
|-------------------------------------------------------------------------------------|---------|---|
| tc Rep: Chromosome chr4 scaffold_73, whole genome shotgun sequence - Vitis vin      | 256.95  | 1 |
| gb KF8C.101J21F.051214T7 KF8 Nicotiana tabacum cDNA clone KF8C.101J21, mRN          | 2445.1  | 1 |
| gb AGN_RNC116xi23f1.ab1 AGN_RNC Nicotiana tabacum cDNA 5', mRNA sequenc             | 30.08   | 1 |
| Unknown                                                                             | 32.76   | 1 |
| tc Rep: Chromosome chr5 scaffold_58, whole genome shotgun sequence - Vitis vin      | 35.39   | 1 |
| Unknown                                                                             | 61.53   | 1 |
| Unknown                                                                             | 228.21  | 1 |
| gb KP1B.104D09F.050725T7 KP1B Nicotiana tabacum cDNA clone KP1B.104D09, m           | 574.4   | 1 |
| Unknown                                                                             | 21.09   | 1 |
| gb KT7C.108A08F.051219T7 KT7 Nicotiana tabacum cDNA clone KT7C.108A08, mRI          | 155.02  | 1 |
| gb TDF16 Tobacco BY-2 ESTs modulated by Rhodococcus fascians Nicotiana tabacu       | 2403.66 | 1 |
| gb KP1B.109H20F.050727T7 KP1B Nicotiana tabacum cDNA clone KP1B.109H20, m           | 34.14   | 1 |
| tc Rep: Chromosome chr6 scaffold_15, whole genome shotgun sequence - Vitis vin      | 261.61  | 1 |
| gb AGN_RNC013xc01f1.ab1 AGN_RNC Nicotiana tabacum cDNA 5', mRNA sequenc             | 928.14  | 1 |
| gb TT-23_K17 K326 late senescent leaf library Nicotiana tabacum cDNA, mRNA seq      | 133.35  | 1 |
| gb Nicotiana tabacum mRNA for nucleosome assembly protein 1 - like protein 1 [A.    | 43.62   | 1 |
| tc Rep: Cyc07 - Nicotiana tabacum (Common tobacco), complete [TC44577]              | 408.18  | 1 |
| tc Rep: Alanine aminotransferase - Capsicum annuum (Bell pepper), partial (41%) [   | 267.64  | 1 |
| gb AGN_RPC016xd16f1.ab1 AGN_RPC Nicotiana tabacum cDNA 5', mRNA sequenc             | 21.08   | 1 |
| gb Nicotiana tabacum mRNA for microtubule-associated protein MAP65-1c (map6!        | 17.19   | 1 |
| Unknown                                                                             | 29.84   | 1 |
| Unknown                                                                             | 100.61  | 1 |
| gb Nicotiana tabacum L-galactose-1-phosphate phosphatase mRNA, complete cds         | 820.29  | 1 |
| tc Rep: Predicted protein - Populus tremula x Populus alba, partial (80%) [TC43847] | 58.48   | 1 |
| gb Nicotiana tabacum cDNA-AFLP-fragment BSTT31-4-590, cultivar Bright Yellow 2      | 388.06  | 1 |
| gb KP1B.104D09F.050725T7 KP1B Nicotiana tabacum cDNA clone KP1B.104D09, m           | 517.94  | 1 |
| tc Rep: Chromosome chr18 scaffold_24, whole genome shotgun sequence - Vitis vi      | 65.93   | 1 |
| gb AGN_RNC116xe01f1.ab1 AGN_RNC Nicotiana tabacum cDNA 5', mRNA sequenc             | 44.6    | 1 |
| Unknown                                                                             | 170.56  | 1 |
| tc Rep: S-adenosylmethionine decarboxylase proenzyme (AdoMetDC) (SamDC) [Cc         | 2771.79 | 1 |
| tc Rep: Heme-binding-like protein At3g10130, chloroplast precursor - Arabidopsis t  | 135.88  | 1 |
| Unknown                                                                             | 648.29  | 1 |
| gb KG9B.104D21F.060120T7 KG9B Nicotiana tabacum cDNA clone KG9B.104D21, n           | 20.9    | 1 |
| Unknown                                                                             | 52.06   | 1 |

|                                                                                     |         |   |
|-------------------------------------------------------------------------------------|---------|---|
| tc Rep: Chromosome chr17 scaffold_16, whole genome shotgun sequence - Vitis vi      | 21.26   | 1 |
| gb AGN_PNL223df1_d4.trimmed.seq AGN_PNL Nicotiana tabacum cDNA 5', mRNA             | 6142.46 | 1 |
| tc Rep: Betaine aldehyde dehydrogenase - Panax ginseng (Korean ginseng), partial (  | 64.7    | 1 |
| tc Rep: Chromosome undetermined scaffold_763, whole genome shotgun sequenc          | 194.67  | 1 |
| gb KF8C.101F22F.051214T7 KF8 Nicotiana tabacum cDNA clone KF8C.101F22, mRN          | 334.47  | 1 |
| gb KR3B.101E16F.051107T7 KR3B Nicotiana tabacum cDNA clone KR3B.101E16, ml          | 519.2   | 1 |
| Unknown                                                                             | 42.09   | 1 |
| gb BL12.101J09F.060309T7 BL12 Nicotiana tabacum cDNA clone BL12.101J09, mRN         | 585.89  | 1 |
| Unknown                                                                             | 137.87  | 1 |
| tc Rep: Chromosome chr1 scaffold_46, whole genome shotgun sequence - Vitis vin      | 224.74  | 1 |
| gb TT-22_A22 K326 late senescent leaf library Nicotiana tabacum cDNA, mRNA seq      | 66.99   | 1 |
| Unknown                                                                             | 33.28   | 1 |
| gb CHO_SL014xk02f1.ab1 CHO_SL Nicotiana tabacum cDNA, mRNA sequence [EH6            | 181.3   | 1 |
| Unknown                                                                             | 18.69   | 1 |
| tc Rep: Ribosomal protein S27 - Vitis vinifera (Grape), complete [TC56735]          | 73.88   | 1 |
| Unknown                                                                             | 49.65   | 1 |
| gb KR3B.113P03F.060119T7 KR3B Nicotiana tabacum cDNA clone KR3B.113P03, ml          | 1585.64 | 1 |
| gb AGN_RPC008xj24f1.ab1 AGN_RPC Nicotiana tabacum cDNA 5', mRNA sequence            | 65.76   | 1 |
| tc Rep: Chromosome chr13 scaffold_17, whole genome shotgun sequence - Vitis vi      | 219.95  | 1 |
| tc Rep: Pectin methylesterase precursor - Nicotiana plumbaginifolia (Leadwort-lea   | 923.63  | 1 |
| tc Rep: Chromosome chr7 scaffold_42, whole genome shotgun sequence - Vitis vin      | 104.97  | 1 |
| gb KL4B.105D03F.051104T7 KL4B Nicotiana tabacum cDNA clone KL4B.105D03, mF          | 9991.6  | 1 |
| gb AGN_RNC020xh06f1.ab1 AGN_RNC Nicotiana tabacum cDNA 5', mRNA sequenc             | 497.02  | 1 |
| tc Rep: U2 snRNP auxiliary factor, large subunit - Nicotiana plumbaginifolia (Leadw | 79.35   | 1 |
| gb AM802231 seedling library, SL Nicotiana tabacum cDNA clone nt002188047, mF       | 829.83  | 1 |
| tc Rep: Chromosome chr9 scaffold_33, whole genome shotgun sequence - Vitis vin      | 516.36  | 1 |
| gb Nicotiana tabacum calcium-dependent protein kinase (CPK5) mRNA, complete c       | 7911.7  | 1 |
| tc Rep: Plastid-lipid-Associated Protein - Nicotiana tabacum (Common tobacco), pa   | 142.82  | 1 |
| gb TT-34_M06 tobacco leaf library Nicotiana tabacum cDNA, mRNA sequence [FG6        | 8456.05 | 1 |
| Unknown                                                                             | 46.46   | 1 |
| gb KL4B.101E24F.051103T7 KL4B Nicotiana tabacum cDNA clone KL4B.101E24, mR          | 167.28  | 1 |
| gb CHO_SL003xl06f1.ab1 CHO_SL Nicotiana tabacum cDNA, mRNA sequence [EH62           | 152.35  | 1 |
| tc Rep: Chromosome chr4 scaffold_6, whole genome shotgun sequence - Vitis vinif     | 628.3   | 1 |
| gb AGN_RNC024xf04f1.ab1 AGN_RNC Nicotiana tabacum cDNA 5', mRNA sequenc             | 75.38   | 1 |

|                                                                                       |          |   |
|---------------------------------------------------------------------------------------|----------|---|
| gb KR3B.112G03F.060119T7 KR3B Nicotiana tabacum cDNA clone KR3B.112G03, m             | 122.05   | 1 |
| gb TT-06_D16 K326 trichome library Nicotiana tabacum cDNA, mRNA sequence [FC          | 79.67    | 1 |
| tc Rep: Chromosome chr4 scaffold_83, whole genome shotgun sequence - Vitis vin        | 55.09    | 1 |
| Unknown                                                                               | 26.08    | 1 |
| gb BP134553 MAT001 Nicotiana tabacum cDNA clone BY6961, mRNA sequence [BF             | 511.05   | 1 |
| tc Rep: Chromosome chr3 scaffold_8, whole genome shotgun sequence - Vitis vinif       | 194      | 1 |
| Unknown                                                                               | 8512.7   | 1 |
| tc Rep: Aconitase - Solanum pennellii (Tomato) (Lycopersicon pennellii), partial (40' | 934.3    | 1 |
| tc Rep: Predicted protein - Physcomitrella patens subsp. patens, complete [TC5815     | 27       | 1 |
| gb KT7C.105D13F.051219T7 KT7 Nicotiana tabacum cDNA clone KT7C.105D13, mRl            | 20.01    | 1 |
| gb KL4B.105G06F.051104T7 KL4B Nicotiana tabacum cDNA clone KL4B.105G06, mF            | 51.36    | 1 |
| tc Rep: Beta tubulin - Setaria viridis, partial (76%) [TC46386]                       | 4313.96  | 1 |
| gb CHO_SL005xm18f1.ab1 CHO_SL Nicotiana tabacum cDNA, mRNA sequence [EH6              | 44346.85 | 1 |
| Unknown                                                                               | 674.3    | 1 |
| gb KG9B.104O21F.060120T7 KG9B Nicotiana tabacum cDNA clone KG9B.104O21, r             | 2686.04  | 1 |
| Unknown                                                                               | 739.92   | 1 |
| Unknown                                                                               | 85.68    | 1 |
| gb CHO_SL010xk15f1.ab1 CHO_SL Nicotiana tabacum cDNA, mRNA sequence [EH6              | 20164.5  | 1 |
| tc Rep: Chromosome chr19 scaffold_4, whole genome shotgun sequence - Vitis vin        | 70.3     | 1 |
| gb CHO_SL028xe07f1.ab1 CHO_SL Nicotiana tabacum cDNA, mRNA sequence [EH6              | 267.77   | 1 |
| gb KL4B.112E14F.060131T7 KL4B Nicotiana tabacum cDNA clone KL4B.112E14, mR            | 53.37    | 1 |
| gb CHO_SL014xb10f1.ab1 CHO_SL Nicotiana tabacum cDNA, mRNA sequence [EH6              | 17.2     | 1 |
| gb AGN_RPC025xh13f1.ab1 AGN_RPC Nicotiana tabacum cDNA 5', mRNA sequence              | 28.33    | 1 |
| tc Rep: Chromosome chr18 scaffold_1, whole genome shotgun sequence - Vitis vin        | 37.85    | 1 |
| Unknown                                                                               | 57.3     | 1 |
| gb KL4B.101F01F.051103T7 KL4B Nicotiana tabacum cDNA clone KL4B.101F01, mR            | 48.09    | 1 |
| gb KG9B.103D07F.051128T7 KG9B Nicotiana tabacum cDNA clone KG9B.103D07, n             | 768.82   | 1 |
| tc Rep: Uncharacterized protein At1g03900 - Arabidopsis thaliana (Mouse-ear cres:     | 171.39   | 1 |
| gb BP525788 MAT001 Nicotiana tabacum cDNA clone BY10478, mRNA sequence [E             | 272.28   | 1 |
| Unknown                                                                               | 37.68    | 1 |
| gb KP1B.109O02F.050727T7 KP1B Nicotiana tabacum cDNA clone KP1B.109O02, m             | 92.53    | 1 |
| tc Rep: Nthsp18p - Nicotiana tabacum (Common tobacco), complete [TC72115]             | 18.42    | 1 |
| gb KF8C.105B01F.051215T7 KF8 Nicotiana tabacum cDNA clone KF8C.105B01, mRN            | 1574.82  | 1 |
| gb KL5B.116F12F.060217T7 KL5B Nicotiana tabacum cDNA clone KL5B.116F12, mR            | 75.49    | 1 |



|                                                                                         |          |   |
|-----------------------------------------------------------------------------------------|----------|---|
| tc GB AF053076.1 AAC06242.1 late embryogenis abundant protein 5 [Nicotiana ta           | 1544.34  | 1 |
| Unknown                                                                                 | 117.42   | 1 |
| tc Rep: Photosystem I psaH protein precursor - Nicotiana sylvestris (Wood tobacco       | 26.72    | 1 |
| Unknown                                                                                 | 204.6    | 1 |
| Unknown                                                                                 | 10860.85 | 1 |
| gb AM793808 seedling library, SL Nicotiana tabacum cDNA clone nt002044052, mF           | 21.14    | 1 |
| gb TT-36_I01 Samsun trichome library Nicotiana tabacum cDNA, mRNA sequence [            | 95.07    | 1 |
| tc Rep: Chromosome chr17 scaffold_101, whole genome shotgun sequence - Vitis v          | 56.27    | 1 |
| Unknown                                                                                 | 92.31    | 1 |
| gb AGN_PNL231br1_e4.trimmed.seq AGN_PNL Nicotiana tabacum cDNA 3', mRNA                 | 160.88   | 1 |
| Unknown                                                                                 | 984.43   | 1 |
| gb AGN_PNL231br1_b4.trimmed.seq AGN_PNL Nicotiana tabacum cDNA 3', mRNA                 | 17.23    | 1 |
| gb KP1B.001H09F.050628T7 KP1B Nicotiana tabacum cDNA clone KP1B.001H09, m               | 928.45   | 1 |
| Unknown                                                                                 | 148.23   | 1 |
| tc Rep: Predicted protein - Nematostella vectensis (Starlet sea anemone), partial (3    | 56665.3  | 1 |
| gb KG9B.103I01F.051128T7 KG9B Nicotiana tabacum cDNA clone KG9B.103I01, mF              | 152.13   | 1 |
| Unknown                                                                                 | 2759.75  | 1 |
| gb KR3B.112C03F.060119T7 KR3B Nicotiana tabacum cDNA clone KR3B.112C03, m               | 25.23    | 1 |
| tc Rep: Chromosome chr15 scaffold_40, whole genome shotgun sequence - Vitis vi          | 162.27   | 1 |
| gb KF8C.101A08F.051214T7 KF8 Nicotiana tabacum cDNA clone KF8C.101A08, mRN              | 87.65    | 1 |
| Unknown                                                                                 | 99.77    | 1 |
| gb TT-39_B06 K326 late senescent leaf library Nicotiana tabacum cDNA, mRNA seq          | 256.13   | 1 |
| tc Rep: Syntaxin-like protein - Solanum tuberosum (Potato), partial (50%) [TC6657C      | 2927.75  | 1 |
| tc Rep: eukaryotic translation initiation factor 2 family protein / eIF-2 family protei | 259.54   | 1 |
| gb KT7C.106J01F.051219T7 KT7 Nicotiana tabacum cDNA clone KT7C.106J01, mRN              | 23.65    | 1 |
| tc Rep: Chromosome chr4 scaffold_6, whole genome shotgun sequence - Vitis vinif         | 283.58   | 1 |
| Unknown                                                                                 | 254.56   | 1 |
| gb KG9B.004C13F.050721T7 KG9B Nicotiana tabacum cDNA clone KG9B.004C13, r               | 506.41   | 1 |
| tc Rep: Chromosome chr11 scaffold_14, whole genome shotgun sequence - Vitis vi          | 15925.65 | 1 |
| gb KT7C.105L01F.051219T7 KT7 Nicotiana tabacum cDNA clone KT7C.105L01, mRN              | 171.53   | 1 |
| gb FS433680 normalized full-length tobacco cDNA library Nicotiana tabacum cDNA          | 114.84   | 1 |
| tc Rep: Inositol polyphosphate kinase - Solanum tuberosum (Potato), partial (36%)       | 134.76   | 1 |
| gb KT7C.106P02F.051219T7 KT7 Nicotiana tabacum cDNA clone KT7C.106P02, mRN              | 61.44    | 1 |
| tc Rep: Chromosome undetermined scaffold_30, whole genome shotgun sequence              | 912.86   | 1 |

|                                                                                     |          |   |
|-------------------------------------------------------------------------------------|----------|---|
| gb KN6B.104A12F.060103T7 KN6B Nicotiana tabacum cDNA clone KN6B.104A12, n           | 419.23   | 1 |
| Unknown                                                                             | 36.23    | 1 |
| tc Rep: Chromosome chr1 scaffold_5, whole genome shotgun sequence - Vitis vinif     | 145.06   | 1 |
| gb N.tabacum npp3 mRNA for protein phosphatase type 1 [Z93770]                      | 57.09    | 1 |
| Unknown                                                                             | 262.22   | 1 |
| tc Rep: Chromosome chr6 scaffold_3, whole genome shotgun sequence - Vitis vinif     | 20.82    | 1 |
| tc Rep: SGT1-2 - Solanum lycopersicum (Tomato) (Lycopersicon esculentum), parti     | 57.8     | 1 |
| gb EST_CSP008xd16f1.ab1 EST_CSP Nicotiana tabacum cDNA, mRNA sequence [EH           | 64.61    | 1 |
| tc Rep: Chromosome chr4 scaffold_6, whole genome shotgun sequence - Vitis vinif     | 449.36   | 1 |
| gb KG9B.103C13F.051128T7 KG9B Nicotiana tabacum cDNA clone KG9B.103C13, r           | 49.23    | 1 |
| gb AGN_ELP022xk22f1.ab1 AGN_ELP Nicotiana tabacum cDNA 5', mRNA sequence            | 120.34   | 1 |
| gb KP1B.105F01F.060116T7 KP1B Nicotiana tabacum cDNA clone KP1B.105F01, mF          | 529.95   | 1 |
| tc Rep: Ribosomal protein L24-like protein - Solanum tuberosum (Potato), partial (2 | 89.09    | 1 |
| gb AGN_PNL230br1_b2.trimmed.seq AGN_PNL Nicotiana tabacum cDNA 3', mRNA             | 145.68   | 1 |
| tc Rep: Chromosome chr12 scaffold_38, whole genome shotgun sequence - Vitis vi      | 1171.65  | 1 |
| gb Nicotiana tabacum AGP4 mRNA for AG-motif binding protein-4, complete cds [A      | 1115.7   | 1 |
| gb Nicotiana tabacum NtTOM3 mRNA for tobamovirus multiplication 3, complete c       | 10380.05 | 1 |
| gb AGN_RNC021xh10f1.ab1 AGN_RNC Nicotiana tabacum cDNA 5', mRNA sequenc             | 21.08    | 1 |
| gb BP137050 MAT001 Nicotiana tabacum cDNA clone BY9702, mRNA sequence [Bf           | 181.23   | 1 |
| tc Rep: ATP synthase delta chain - Buchnera aphidicola subsp. Schizaphis graminur   | 92       | 1 |
| gb KF8C.103I08F.051214T7 KF8 Nicotiana tabacum cDNA clone KF8C.103I08, mRN/         | 468.31   | 1 |
| gb AGN_RNC026xn20f1.ab1 AGN_RNC Nicotiana tabacum cDNA 5', mRNA sequenc             | 621.5    | 1 |
| tc Rep: Chromosome chr8 scaffold_23, whole genome shotgun sequence - Vitis vin      | 107.61   | 1 |
| tc Rep: Chromosome chr13 scaffold_17, whole genome shotgun sequence - Vitis vi      | 29.34    | 1 |
| gb KR3B.104F16F.051108T7 KR3B Nicotiana tabacum cDNA clone KR3B.104F16, mF          | 52.74    | 1 |
| gb FS435443 normalized full-length tobacco cDNA library Nicotiana tabacum cDNA      | 220.24   | 1 |
| tc Rep: Chromosome chr15 scaffold_40, whole genome shotgun sequence - Vitis vi      | 113.53   | 1 |
| Unknown                                                                             | 174.54   | 1 |
| gb KF8C.102H18F.051214T7 KF8 Nicotiana tabacum cDNA clone KF8C.102H18, mRI          | 2682.92  | 1 |
| Unknown                                                                             | 737.92   | 1 |
| Unknown                                                                             | 40.18    | 1 |
| tc Rep: Chromosome chr18 scaffold_1, whole genome shotgun sequence - Vitis vin      | 17567.2  | 1 |
| gb TT-40_M13 Burley21 trichome library Nicotiana tabacum cDNA, mRNA sequenc         | 313.07   | 1 |
| gb Nicotiana tabacum mRNA for 14-3-3 a-1 protein, complete cds [AB119466]           | 3720.45  | 1 |

|                                                                                   |         |   |
|-----------------------------------------------------------------------------------|---------|---|
| gb Nicotiana tabacum NtMFP mRNA for multifunctional protein, complete cds [AB4    | 47.74   | 1 |
| tc Rep: DNA mismatch repair protein - Solanum lycopersicum (Tomato) (Lycopersic   | 22.91   | 1 |
| tc Rep: Chromosome undetermined scaffold_77, whole genome shotgun sequence        | 139.25  | 1 |
| tc Rep: 40S ribosomal protein S25 - Solanum lycopersicum (Tomato) (Lycopersicon   | 178.84  | 1 |
| gb KL4B.105A10F.051104T7 KL4B Nicotiana tabacum cDNA clone KL4B.105A10, mF        | 2655.93 | 1 |
| gb Nicotiana tabacum DNA-directed RNA polymerase IIb (NT193) mRNA, complete       | 94.63   | 1 |
| gb KP1B.102E02F.050722T7 KP1B Nicotiana tabacum cDNA clone KP1B.102E02, mF        | 55.31   | 1 |
| tc Rep: Chromosome undetermined scaffold_142, whole genome shotgun sequenc        | 112.85  | 1 |
| gb AGN_ELP010xg05f1.ab1 AGN_ELP Nicotiana tabacum cDNA 5', mRNA sequence          | 56.38   | 1 |
| tc Rep: Chromosome chr15 scaffold_19, whole genome shotgun sequence - Vitis vi    | 320.76  | 1 |
| tc Rep: Chromosome chr12 scaffold_38, whole genome shotgun sequence - Vitis vi    | 1076.56 | 1 |
| gb KR2B.110H02F.051229T7 KR2B Nicotiana tabacum cDNA clone KR2B.110H02, m         | 31.47   | 1 |
| gb Nicotiana tabacum plastid phosphate [U66401]                                   | 274.83  | 1 |
| tc Rep: Ribosomal protein L33 - Castanea sativa (Sweet chestnut), complete [TC492 | 146.81  | 1 |
| Unknown                                                                           | 25.34   | 1 |
| Unknown                                                                           | 44.48   | 1 |
| gb AM831732 seedling library, SL Nicotiana tabacum cDNA clone nt002273057, mF     | 18.92   | 1 |
| tc Rep: Chromosome chr18 scaffold_1, whole genome shotgun sequence - Vitis vin    | 109.33  | 1 |
| gb TT-49_H10 K326 late senescent leaf library Nicotiana tabacum cDNA, mRNA seq    | 256.83  | 1 |
| Unknown                                                                           | 1595.32 | 1 |
| Unknown                                                                           | 92.53   | 1 |
| Unknown                                                                           | 684.95  | 1 |
| gb KT7C.112H06F.051221T7 KT7 Nicotiana tabacum cDNA clone KT7C.112H06, mR         | 2426.7  | 1 |
| Unknown                                                                           | 4218.18 | 1 |
| Unknown                                                                           | 177.37  | 1 |
| tc Rep: Chromosome chr13 scaffold_17, whole genome shotgun sequence - Vitis vi    | 562.99  | 1 |
| tc Rep: Chromosome chr8 scaffold_23, whole genome shotgun sequence - Vitis vin    | 151.77  | 1 |
| tc Rep: Chromosome chr6 scaffold_3, whole genome shotgun sequence - Vitis vinif   | 525.03  | 1 |
| gb KN6B.105M12F.060104T7 KN6B Nicotiana tabacum cDNA clone KN6B.105M12,           | 464.76  | 1 |
| gb KN6B.100E17F.051019T7 KN6B Nicotiana tabacum cDNA clone KN6B.100E17, m         | 993.75  | 1 |
| gb AM835801 seedling library, SL Nicotiana tabacum cDNA clone nt002090022, mF     | 31.81   | 1 |
| Unknown                                                                           | 41.6    | 1 |
| gb TT-14_N05 K326 late senescent leaf library Nicotiana tabacum cDNA, mRNA seq    | 42.45   | 1 |
| Unknown                                                                           | 408.44  | 1 |

|                                                                                      |          |   |
|--------------------------------------------------------------------------------------|----------|---|
| gb KP1B.109O08F.050727T7 KP1B Nicotiana tabacum cDNA clone KP1B.109O08, m            | 152.44   | 1 |
| tc Rep: Dehydroquinase synthase - Solanum lycopersicum (Tomato) (Lycopersicon        | 508.91   | 1 |
| Unknown                                                                              | 2857.19  | 1 |
| gb KT7C.101K21F.051216T7 KT7 Nicotiana tabacum cDNA clone KT7C.101K21, mRN           | 2989.93  | 1 |
| tc Rep: Chromosome chr18 scaffold_1, whole genome shotgun sequence - Vitis vin       | 32.48    | 1 |
| gb KG9B.106E24F.051129T7 KG9B Nicotiana tabacum cDNA clone KG9B.106E24, m            | 89.36    | 1 |
| gb TT-36_P22 tobacco leaf library Nicotiana tabacum cDNA, mRNA sequence [FG63        | 602.5    | 1 |
| gb Nicotiana tabacum phospholipase C2 mRNA, complete cds [AF223573]                  | 27.1     | 1 |
| tc Rep: Beta tubulin - Setaria viridis, partial (47%) [TC42115]                      | 9592     | 1 |
| gb KF8C.106C20F.051215T7 KF8 Nicotiana tabacum cDNA clone KF8C.106C20, mRN           | 564.47   | 1 |
| gb KL5B.011M16F.051129T7 KL5B Nicotiana tabacum cDNA clone KL5B.011M16, m            | 573.03   | 1 |
| gb KR3B.103C13F.051108T7 KR3B Nicotiana tabacum cDNA clone KR3B.103C13, m            | 5263.62  | 1 |
| Unknown                                                                              | 29.52    | 1 |
| Unknown                                                                              | 54.58    | 1 |
| gb KF8B.201C11F.060124T7 KF8 Nicotiana tabacum cDNA clone KF8B.201C11, mRN           | 27.88    | 1 |
| tc Rep: Chromosome chr4 scaffold_32, whole genome shotgun sequence - Vitis vin       | 49.87    | 1 |
| Unknown                                                                              | 58.98    | 1 |
| gb KG9B.106D04F.051129T7 KG9B Nicotiana tabacum cDNA clone KG9B.106D04, n            | 146.2    | 1 |
| gb KG9B.005J14F.050721T7 KG9B Nicotiana tabacum cDNA clone KG9B.005J14, m            | 564.23   | 1 |
| tc Rep: Isocitrate dehydrogenase [NADP] (Oxalosuccinate decarboxylase) (IDH) (N/     | 55.72    | 1 |
| tc Rep: Chromosome chr12 scaffold_18, whole genome shotgun sequence - Vitis vi       | 80.51    | 1 |
| Unknown                                                                              | 139      | 1 |
| gb TT-41_F01 K326 late senescent leaf library Nicotiana tabacum cDNA, mRNA seq       | 51.83    | 1 |
| gb KF8B.202P11F.060124T7 KF8 Nicotiana tabacum cDNA clone KF8B.202P11, mRN           | 20854.95 | 1 |
| Unknown                                                                              | 29.91    | 1 |
| Unknown                                                                              | 1031.78  | 1 |
| Unknown                                                                              | 86.33    | 1 |
| gb KL4B.102D19F.051125T7 KL4B Nicotiana tabacum cDNA clone KL4B.102D19, m            | 258.27   | 1 |
| tc Rep: Expressed protein - Arabidopsis thaliana (Mouse-ear cress), partial (20%) [T | 138.94   | 1 |
| gb KT7B.100B15F.051010T7 KT7 Nicotiana tabacum cDNA clone KT7B.100B15, mRN           | 51830.9  | 1 |
| tc Rep: Chromosome chr15 scaffold_37, whole genome shotgun sequence - Vitis vi       | 33.52    | 1 |
| gb KF8C.103D10F.051214T7 KF8 Nicotiana tabacum cDNA clone KF8C.103D10, mRN           | 82.05    | 1 |
| tc Rep: Carotenoid cleavage dioxygenase 1B - Solanum lycopersicum (Tomato) (Lyc      | 108.68   | 1 |
| Unknown                                                                              | 10836.45 | 1 |

|                                                                                                 |         |   |
|-------------------------------------------------------------------------------------------------|---------|---|
| tc Rep: Chromosome chr5 scaffold_2, whole genome shotgun sequence - Vitis vinifera              | 95.99   | 1 |
| tc Rep: UP-9A - Nicotiana tabacum (Common tobacco), complete [TC51728]                          | 44.66   | 1 |
| gb AGN_RNC127xf06f1.ab1 AGN_RNC Nicotiana tabacum cDNA 5', mRNA sequence                        | 55.54   | 1 |
| Unknown                                                                                         | 122.34  | 1 |
| Unknown                                                                                         | 259.76  | 1 |
| gb AGN_RNC111xf20f1.ab1 AGN_RNC Nicotiana tabacum cDNA 5', mRNA sequence                        | 20.91   | 1 |
| tc Rep: Chromosome chr8 scaffold_68, whole genome shotgun sequence - Vitis vinifera             | 43.34   | 1 |
| gb KL4B.108D06F.051105T7 KL4B Nicotiana tabacum cDNA clone KL4B.108D06, mRNA                    | 20.76   | 1 |
| gb KL4B.101M04F.051103T7 KL4B Nicotiana tabacum cDNA clone KL4B.101M04, mRNA                    | 524.76  | 1 |
| tc Rep: Ripening regulated protein DDTFR10-like - Solanum tuberosum (Potato), partial           | 593.23  | 1 |
| Unknown                                                                                         | 62.45   | 1 |
| tc Rep: Chromosome chr10 scaffold_138, whole genome shotgun sequence - Vitis vinifera           | 121.35  | 1 |
| gb KG9B.102L19F.051126T7 KG9B Nicotiana tabacum cDNA clone KG9B.102L19, mRNA                    | 57.63   | 1 |
| tc Rep: High mobility group protein 2 HMG2 - Ipomoea nil (Japanese morning glory)               | 5535.92 | 1 |
| tc Rep: Chromosome chr17 scaffold_12, whole genome shotgun sequence - Vitis vinifera            | 92.52   | 1 |
| gb AM802407 DL, diurnal library Nicotiana tabacum cDNA clone nt005088022, mRNA                  | 64.81   | 1 |
| gb Nicotiana tabacum partial mRNA for villin 1 (vln1 gene) [AJ577852]                           | 4563.2  | 1 |
| tc Rep: Thiosulfate sulfurtransferase - Datisca glomerata (Durango root), partial (588 bp)      | 31.2    | 1 |
| Unknown                                                                                         | 214.35  | 1 |
| tc Rep: Extracellular solute-binding protein, family 1 precursor - Roseiflexus sp. (str)        | 31.59   | 1 |
| gb KG9B.101N18F.060120T7 KG9B Nicotiana tabacum cDNA clone KG9B.101N18, mRNA                    | 199.03  | 1 |
| tc Rep: Chromosome chr8 scaffold_150, whole genome shotgun sequence - Vitis vinifera            | 578.94  | 1 |
| tc Rep: Vacuolar protein sorting-associated protein 26-like protein - Solanum tuberosum         | 150.3   | 1 |
| tc Rep: Chromosome chr4 scaffold_83, whole genome shotgun sequence - Vitis vinifera             | 105.8   | 1 |
| gb KG9B.001A15F.050628T7 KG9B Nicotiana tabacum cDNA clone KG9B.001A15, mRNA                    | 133.04  | 1 |
| Unknown                                                                                         | 312.21  | 1 |
| Unknown                                                                                         | 43.3    | 1 |
| gb KL4B.111N06F.060128T7 KL4B Nicotiana tabacum cDNA clone KL4B.111N06, mRNA                    | 27.25   | 1 |
| tc Rep: 14-3-3 e-1 protein - Nicotiana tabacum (Common tobacco), complete [TC40000]             | 34.62   | 1 |
| tc Rep: Chromosome chr9 scaffold_7, whole genome shotgun sequence - Vitis vinifera              | 379.64  | 1 |
| Unknown                                                                                         | 435.67  | 1 |
| Unknown                                                                                         | 30.16   | 1 |
| gb KF8C.104D06F.051214T7 KF8 Nicotiana tabacum cDNA clone KF8C.104D06, mRNA                     | 152.01  | 1 |
| tc Rep: Eukaryotic initiation factor 4A-3 - Nicotiana plumbaginifolia (Leadwort-leaved tobacco) | 948.4   | 1 |

|                                                                                      |         |   |
|--------------------------------------------------------------------------------------|---------|---|
| gb CHO_SL018xn22f1.ab1 CHO_SL Nicotiana tabacum cDNA, mRNA sequence [EH6             | 35.97   | 1 |
| tc Rep: At4g40042 - Arabidopsis thaliana (Mouse-ear cress), partial (88%) [TC65781   | 721.01  | 1 |
| Unknown                                                                              | 100.94  | 1 |
| Unknown                                                                              | 26.39   | 1 |
| gb BP128992 MAT001 Nicotiana tabacum cDNA clone BY816, mRNA sequence [BP:            | 103.13  | 1 |
| gb KP1B.104H11F.050725T7 KP1B Nicotiana tabacum cDNA clone KP1B.104H11, m            | 60.01   | 1 |
| Unknown                                                                              | 126.07  | 1 |
| tc Rep: Predicted protein - Physcomitrella patens subsp. patens, partial (7%) [TC748 | 218.29  | 1 |
| tc Rep: Alanine aminotransferase - Capsicum annuum (Bell pepper), partial (41%) [    | 99.89   | 1 |
| Unknown                                                                              | 109.4   | 1 |
| Unknown                                                                              | 56.24   | 1 |
| Unknown                                                                              | 472.16  | 1 |
| tc Rep: Chromosome undetermined scaffold_334, whole genome shotgun sequenc           | 107.27  | 1 |
| gb UFRST92 tobacco root and stem SSH cDNA Library Nicotiana tabacum cDNA, mF         | 120.12  | 1 |
| Unknown                                                                              | 101.81  | 1 |
| Unknown                                                                              | 745.75  | 1 |
| Unknown                                                                              | 3317.22 | 1 |
| gb KF8C.101G01F.051214T7 KF8 Nicotiana tabacum cDNA clone KF8C.101G01, mRI           | 536.73  | 1 |
| tc Rep: EIN2 - Petunia hybrida (Petunia), partial (19%) [TC50365]                    | 18.97   | 1 |
| tc Rep: Chromosome chr5 scaffold_2, whole genome shotgun sequence - Vitis vinif      | 967.99  | 1 |
| Unknown                                                                              | 980.85  | 1 |
| tc Rep: Mevalonate kinase - Hevea brasiliensis (Para rubber tree), partial (91%) [TC | 144.12  | 1 |
| gb KG9B.004C13F.050721T7 KG9B Nicotiana tabacum cDNA clone KG9B.004C13, m            | 62.68   | 1 |
| tc Rep: Proteasome subunit alpha type - Vitis vinifera (Grape), partial (74%) [TC440 | 198.87  | 1 |
| tc Rep: Isoform 2 of Q8L828 - Arabidopsis thaliana (Mouse-ear cress), partial (13%   | 654.48  | 1 |
| tc Rep: OrfB protein - Nicotiana tabacum (Common tobacco), complete [TC46100]        | 289.47  | 1 |
| Unknown                                                                              | 219.56  | 1 |
| tc Rep: Glyceraldehyde-3-phosphate dehydrogenase - Nicotiana tabacum (Commor         | 91.69   | 1 |
| Unknown                                                                              | 56.4    | 1 |
| gb KL4B.101L06F.051103T7 KL4B Nicotiana tabacum cDNA clone KL4B.101L06, mRI          | 1329.98 | 1 |
| gb BP534527 MAT005 Nicotiana tabacum cDNA clone BY33107, mRNA sequence [E            | 219.37  | 1 |
| tc Rep: ADP-ribosylation factor - Hyacinthus orientalis (Common hyacinth), partial ( | 10597.6 | 1 |
| tc Rep: Predicted protein - Physcomitrella patens subsp. patens, partial (87%) [TC66 | 194.14  | 1 |
| Unknown                                                                              | 18.06   | 1 |

|                                                                                        |          |   |
|----------------------------------------------------------------------------------------|----------|---|
| gb KL5B.109O08F.060215T7 KL5B Nicotiana tabacum cDNA clone KL5B.109O08, mF             | 2410.7   | 1 |
| tc Rep: Chromosome chr8 scaffold_88, whole genome shotgun sequence - Vitis vin         | 248.53   | 1 |
| Unknown                                                                                | 128.84   | 1 |
| gb KL5B.103D14F.060207T7 KL5B Nicotiana tabacum cDNA clone KL5B.103D14, mF             | 163.56   | 1 |
| gb AGN_RNC012xp10f1.ab1 AGN_RNC Nicotiana tabacum cDNA 5', mRNA sequenc                | 70.12    | 1 |
| Unknown                                                                                | 1526.26  | 1 |
| gb TT-03_J18 K326 early senescent leaf library Nicotiana tabacum cDNA, mRNA sec        | 82.42    | 1 |
| tc Rep: Histone H2A - Euphorbia esula (Leafy spurge), partial (95%) [TC53700]          | 404.78   | 1 |
| Unknown                                                                                | 35.24    | 1 |
| tc Rep: Chromosome chr7 scaffold_20, whole genome shotgun sequence - Vitis vin         | 143.75   | 1 |
| gb TT-07_C15 K326 early senescent leaf library Nicotiana tabacum cDNA, mRNA se         | 496.83   | 1 |
| gb KF8C.105A17F.051215T7 KF8 Nicotiana tabacum cDNA clone KF8C.105A17, mRN             | 55.44    | 1 |
| gb KL4B.103P04F.051103T7 KL4B Nicotiana tabacum cDNA clone KL4B.103P04, mR             | 11728.35 | 1 |
| tc Rep: Chromosome chr14 scaffold_27, whole genome shotgun sequence - Vitis vi         | 437.11   | 1 |
| gb KP1B.108C05F.050726T7 KP1B Nicotiana tabacum cDNA clone KP1B.108C05, mI             | 164.38   | 1 |
| gb TT-29_G12 K326 late senescent leaf library Nicotiana tabacum cDNA, mRNA seq         | 116.53   | 1 |
| Unknown                                                                                | 8754.4   | 1 |
| gb Nicotiana tabacum calcium-dependent protein kinase CDPK5 (CDPK5) mRNA, co           | 21.25    | 1 |
| gb KN6B.101I24F.051230T7 KN6B Nicotiana tabacum cDNA clone KN6B.101I24, mF             | 53.13    | 1 |
| gb TT-09_K02 Samsun trichome library Nicotiana tabacum cDNA, mRNA sequence             | 1529.43  | 1 |
| gb KG9B.002P06F.050720T7 KG9B Nicotiana tabacum cDNA clone KG9B.002P06, m              | 155.29   | 1 |
| Unknown                                                                                | 201.23   | 1 |
| gb KR2B.107K23F.051229T7 KR2B Nicotiana tabacum cDNA clone KR2B.107K23, mI             | 922.76   | 1 |
| Unknown                                                                                | 159.9    | 1 |
| Unknown                                                                                | 228.86   | 1 |
| gb AGN_RNC124xe12f1.ab1 AGN_RNC Nicotiana tabacum cDNA 5', mRNA sequenc                | 49.81    | 1 |
| tc Rep: Ferredoxin - Impatiens balsamina (Balsam), partial (79%) [TC48877]             | 919.11   | 1 |
| tc Rep: Chromosome chr11 scaffold_13, whole genome shotgun sequence - Vitis vi         | 250.73   | 1 |
| Unknown                                                                                | 2135.8   | 1 |
| Unknown                                                                                | 27.32    | 1 |
| tc Rep: Galactose-1-phosphate uridylyltransferase - Vitis vinifera (Grape), partial (9 | 1863.77  | 1 |
| gb KT7C.101J05F.051216T7 KT7 Nicotiana tabacum cDNA clone KT7C.101J05, mRN             | 116.11   | 1 |
| gb TT-27_F19 Burley21 trichome library Nicotiana tabacum cDNA, mRNA sequence           | 252.87   | 1 |
| gb KT7B.107L23F.060124T7 KT7 Nicotiana tabacum cDNA clone KT7B.107L23, mRN             | 91.26    | 1 |

|                                                                                           |         |   |
|-------------------------------------------------------------------------------------------|---------|---|
| gb ntsm41 embryogenic microspores <i>Nicotiana tabacum</i> cDNA, mRNA sequence [E         | 80.91   | 1 |
| Unknown                                                                                   | 37.89   | 1 |
| gb TT-08_H01 Burley21 trichome library <i>Nicotiana tabacum</i> cDNA, mRNA sequence       | 149.71  | 1 |
| gb BP128500 MAT001 <i>Nicotiana tabacum</i> cDNA clone BY252, mRNA sequence [BP:          | 30.43   | 1 |
| gb  <i>Nicotiana tabacum</i> ferritin mRNA, complete cds [AY083924]                       | 919.85  | 1 |
| gb KF8C.103H08F.051214T7 KF8 <i>Nicotiana tabacum</i> cDNA clone KF8C.103H08, mRI         | 989.28  | 1 |
| tc Rep: Extensin - <i>Nicotiana tabacum</i> (Common tobacco), partial (98%) [TC76880]     | 150.43  | 1 |
| gb KF8C.106O02F.051215T7 KF8 <i>Nicotiana tabacum</i> cDNA clone KF8C.106O02, mRI         | 56.72   | 1 |
| gb KR2B.109M17F.051229T7 KR2B <i>Nicotiana tabacum</i> cDNA clone KR2B.109M17, r          | 181.68  | 1 |
| gb KT7C.110P16F.051221T7 KT7 <i>Nicotiana tabacum</i> cDNA clone KT7C.110P16, mRI         | 31.72   | 1 |
| Unknown                                                                                   | 56.53   | 1 |
| tc Rep: Chromosome chr19 scaffold_4, whole genome shotgun sequence - <i>Vitis vin</i>     | 613.99  | 1 |
| Unknown                                                                                   | 45.93   | 1 |
| Unknown                                                                                   | 39.27   | 1 |
| Unknown                                                                                   | 62.99   | 1 |
| Unknown                                                                                   | 104.18  | 1 |
| tc Rep: ADP,ATP carrier protein 1, mitochondrial precursor - <i>Gossypium hirsutum</i> (l | 18698.5 | 1 |
| Unknown                                                                                   | 513.02  | 1 |
| tc Rep: BH1020 protein - <i>Bacillus halodurans</i> , partial (6%) [TC76180]              | 208.54  | 1 |
| Unknown                                                                                   | 218.45  | 1 |
| gb CHO_SL005xf23f1.ab1 CHO_SL <i>Nicotiana tabacum</i> cDNA, mRNA sequence [EH6:          | 97.78   | 1 |
| tc Rep: At2g36630/F1O11.26 - <i>Arabidopsis thaliana</i> (Mouse-ear cress), partial (21%  | 864.61  | 1 |
| gb KR3B.108K21F.051110T7 KR3B <i>Nicotiana tabacum</i> cDNA clone KR3B.108K21, mI         | 32.65   | 1 |
| gb TT-41_B17 Samsun trichome library <i>Nicotiana tabacum</i> cDNA, mRNA sequence         | 72.35   | 1 |
| tc Rep: Chromosome chr3 scaffold_8, whole genome shotgun sequence - <i>Vitis vinif</i>    | 29.53   | 1 |
| gb AM831626 DL, diurnal library <i>Nicotiana tabacum</i> cDNA clone nt005230023, mRI      | 24.82   | 1 |
| Unknown                                                                                   | 2902.32 | 1 |
| tc Rep: Chromosome undetermined scaffold_528, whole genome shotgun sequenc                | 438.01  | 1 |
| tc Rep: Chromosome chr5 scaffold_67, whole genome shotgun sequence - <i>Vitis vin</i>     | 1592.25 | 1 |
| tc Rep: Bromodomain-containing RNA-binding protein 2 - <i>Nicotiana tabacum</i> (Com      | 2408.03 | 1 |
| tc Rep: Chromosome chr11 scaffold_14, whole genome shotgun sequence - <i>Vitis vi</i>     | 491.11  | 1 |
| Unknown                                                                                   | 146.87  | 1 |
| gb KF8C.101D01F.051214T7 KF8 <i>Nicotiana tabacum</i> cDNA clone KF8C.101D01, mRI         | 28321.3 | 1 |
| Unknown                                                                                   | 2712.93 | 1 |



|                                                                                         |         |   |
|-----------------------------------------------------------------------------------------|---------|---|
| Unknown                                                                                 | 63.59   | 1 |
| Unknown                                                                                 | 81.21   | 1 |
| Unknown                                                                                 | 2656.63 | 1 |
| gb AGN_RNC106xk10r1.ab1 AGN_RNC Nicotiana tabacum cDNA 3', mRNA sequenc                 | 17.58   | 1 |
| tc Rep: SUMO protein - Solanum lycopersicum (Tomato) (Lycopersicon esculentum           | 788.84  | 1 |
| gb FS436463 normalized full-length tobacco cDNA library Nicotiana tabacum cDNA          | 52.76   | 1 |
| gb KN6B.102G06F.051230T7 KN6B Nicotiana tabacum cDNA clone KN6B.102G06, n               | 4891.31 | 1 |
| Unknown                                                                                 | 189.28  | 1 |
| tc Rep: T-complex protein 1, alpha subunit - Bruguiera sexangula, partial (38%) [TC     | 90      | 1 |
| tc Rep: 60S ribosomal protein I2 - Oryza sativa subsp. indica (Rice), partial (36%) [TC | 90.87   | 1 |
| Unknown                                                                                 | 101.85  | 1 |
| tc Rep: Chromosome chr12 scaffold_103, whole genome shotgun sequence - Vitis v          | 1131.7  | 1 |
| gb KG9B.103K07F.051128T7 KG9B Nicotiana tabacum cDNA clone KG9B.103K07, m               | 706.84  | 1 |
| tc Rep: CDK/cyclin inhibitor - Nicotiana sylvestris (Wood tobacco), complete [TC61      | 589.07  | 1 |
| gb KR3B.104G23F.051108T7 KR3B Nicotiana tabacum cDNA clone KR3B.104G23, m               | 84.32   | 1 |
| gb KG9B.002G08F.050720T7 KG9B Nicotiana tabacum cDNA clone KG9B.002G08, n               | 226.06  | 1 |
| Unknown                                                                                 | 862.15  | 1 |
| tc Rep: AT3g20300/MQC12_5 - Arabidopsis thaliana (Mouse-ear cress), partial (18         | 79.17   | 1 |
| Unknown                                                                                 | 22.62   | 1 |
| gb KP1B.102J06F.050722T7 KP1B Nicotiana tabacum cDNA clone KP1B.102J06, mR              | 650.47  | 1 |
| Unknown                                                                                 | 253.74  | 1 |
| Unknown                                                                                 | 937.04  | 1 |
| gb KG9B.005H08F.050721T7 KG9B Nicotiana tabacum cDNA clone KG9B.005H08, n               | 250.84  | 1 |
| gb AGN_ELP014xc17f1.ab1 AGN_ELP Nicotiana tabacum cDNA 5', mRNA sequence                | 60.05   | 1 |
| Unknown                                                                                 | 1529.81 | 1 |
| Unknown                                                                                 | 5817.67 | 1 |
| gb N.tabacum mRNA for L-Glutamate:tRNA-Glu ligase [X83524]                              | 268.18  | 1 |
| tc Rep: CAX-interacting protein 4 - Arabidopsis thaliana (Mouse-ear cress), partial (   | 271.62  | 1 |
| tc Rep: Chromosome chr18 scaffold_1, whole genome shotgun sequence - Vitis vin          | 2946.68 | 1 |
| tc Rep: 60S ribosomal protein L21-like protein - Solanum tuberosum (Potato), com        | 967.55  | 1 |
| gb KN6B.104C22F.060103T7 KN6B Nicotiana tabacum cDNA clone KN6B.104C22, n               | 23.2    | 1 |
| Unknown                                                                                 | 710.89  | 1 |
| gb AGN_PNL215df1_e5.trimmed.seq AGN_PNL Nicotiana tabacum cDNA 5', mRNA                 | 42.53   | 1 |
| Unknown                                                                                 | 90.96   | 1 |

|                                                                                      |          |   |
|--------------------------------------------------------------------------------------|----------|---|
| tc Rep: Chromosome chr14 scaffold_21, whole genome shotgun sequence - Vitis vi       | 20.86    | 1 |
| tc Rep: Mitochondrial-processing peptidase subunit alpha, mitochondrial precursor    | 1508.11  | 1 |
| tc Rep: Chromosome chr2 scaffold_112, whole genome shotgun sequence - Vitis vi       | 182.86   | 1 |
| gb KP1B.101E03F.050722T7 KP1B Nicotiana tabacum cDNA clone KP1B.101E03, mF           | 215      | 1 |
| tc Rep: Chromosome chr8 scaffold_34, whole genome shotgun sequence - Vitis vin       | 496.47   | 1 |
| tc Rep: Molecular chaperone Hsp90-2 - Nicotiana benthamiana, partial (25%) [TC45     | 365.6    | 1 |
| gb Peg94C Early stage of anther development specific suppression subtractive cDN.    | 56.13    | 1 |
| Unknown                                                                              | 26.91    | 1 |
| gb KT7C.112J04F.051221T7 KT7 Nicotiana tabacum cDNA clone KT7C.112J04, mRN           | 469.31   | 1 |
| Unknown                                                                              | 26.32    | 1 |
| Unknown                                                                              | 18.96    | 1 |
| tc Rep: Uncharacterized aarF domain-containing protein kinase At5g05200, chlorop     | 25.62    | 1 |
| gb KF8B.201B11F.060124T7 KF8 Nicotiana tabacum cDNA clone KF8B.201B11, mRN           | 44.88    | 1 |
| gb KG9B.001M18F.050628T7 KG9B Nicotiana tabacum cDNA clone KG9B.001M18,              | 32.36    | 1 |
| tc Rep: Chloroplast methionine sulfoxide reductase B1 precursor - Nicotiana tabac    | 397.08   | 1 |
| gb KF8B.100P17F.051010T7 KF8 Nicotiana tabacum cDNA clone KF8B.100P17, mRN           | 151.44   | 1 |
| Unknown                                                                              | 58.05    | 1 |
| tc Rep: Chromosome chr18 scaffold_1, whole genome shotgun sequence - Vitis vin       | 11226.8  | 1 |
| tc Rep: Chromosome chr9 scaffold_7, whole genome shotgun sequence - Vitis vinif      | 23.9     | 1 |
| tc Rep: Chromosome chr10 scaffold_76, whole genome shotgun sequence - Vitis vi       | 172.54   | 1 |
| tc Rep: Chromosome chr1 scaffold_75, whole genome shotgun sequence - Vitis vin       | 90.91    | 1 |
| gb CHO_SL010xe03f1.ab1 CHO_SL Nicotiana tabacum cDNA, mRNA sequence [EH6             | 1194.86  | 1 |
| tc GB AJ291736.1 CAC43321.1 putative beta proteasome subunit [Nicotiana tabac        | 27.69    | 1 |
| tc Rep: Serine/threonine protein phosphatase - Vitis vinifera (Grape), partial (24%) | 254.74   | 1 |
| gb KP1B.001J22F.050628T7 KP1B Nicotiana tabacum cDNA clone KP1B.001J22, mR           | 112.44   | 1 |
| tc Rep: Multidrug Resistance associated Protein 1 - Catharanthus roseus (Rosy peri   | 101.24   | 1 |
| gb AB032546 Nicotiana tabacum immature pollen grains Nicotiana tabacum cDNA          | 32223.15 | 1 |
| gb KR2B.001N12F.050815T7 KR2B Nicotiana tabacum cDNA clone KR2B.001N12, m            | 107.53   | 1 |
| tc Rep: Superoxide dismutase [Cu-Zn] - Populus tremula x Populus tremuloides, par    | 19.42    | 1 |
| gb KG9B.002K23F.050720T7 KG9B Nicotiana tabacum cDNA clone KG9B.002K23, m            | 490.24   | 1 |
| tc Rep: Chromosome chr4 scaffold_39, whole genome shotgun sequence - Vitis vin       | 1566.38  | 1 |
| gb AGN_PNL219ar1_c5.trimmed.seq AGN_PNL Nicotiana tabacum cDNA 3', mRNA              | 88.15    | 1 |
| Unknown                                                                              | 26.2     | 1 |
| gb KL4B.104F10F.051104T7 KL4B Nicotiana tabacum cDNA clone KL4B.104F10, mR           | 100.68   | 1 |

|                                                                                     |         |   |
|-------------------------------------------------------------------------------------|---------|---|
| tc Rep: Chromosome undetermined scaffold_100, whole genome shotgun sequenc          | 27.04   | 1 |
| gb KF8C.105K17F.051215T7 KF8 Nicotiana tabacum cDNA clone KF8C.105K17, mRN          | 24.87   | 1 |
| gb CHO_SL023xn20f1.ab1 CHO_SL Nicotiana tabacum cDNA, mRNA sequence [EH6            | 1115.57 | 1 |
| gb KP1B.105G14F.060116T7 KP1B Nicotiana tabacum cDNA clone KP1B.105G14, m           | 23.42   | 1 |
| Unknown                                                                             | 18721.4 | 1 |
| gb KL4B.106I23F.051125T7 KL4B Nicotiana tabacum cDNA clone KL4B.106I23, mRN         | 29.77   | 1 |
| gb KR2B.001F01F.050815T7 KR2B Nicotiana tabacum cDNA clone KR2B.001F01, mF          | 192.81  | 1 |
| tc Rep: Chromosome chr14 scaffold_21, whole genome shotgun sequence - Vitis vi      | 112.1   | 1 |
| Unknown                                                                             | 139.42  | 1 |
| tc Rep: UDP-glucose glucosyltransferase - Catharanthus roseus (Rosy periwinkle) (N  | 55.53   | 1 |
| gb KP1B.103J10F.050725T7 KP1B Nicotiana tabacum cDNA clone KP1B.103J10, mR          | 520.63  | 1 |
| Unknown                                                                             | 32.29   | 1 |
| gb KF8C.106J19F.051215T7 KF8 Nicotiana tabacum cDNA clone KF8C.106J19, mRN,         | 227.93  | 1 |
| Unknown                                                                             | 17.78   | 1 |
| tc Rep: Alpha-soluble NSF attachment protein - Solanum tuberosum (Potato), parti    | 1237.3  | 1 |
| tc Rep: S-adenosylmethionine decarboxylase - Prunus persica (Peach), partial (52%   | 243.61  | 1 |
| gb KL4B.113C20F.060131T7 KL4B Nicotiana tabacum cDNA clone KL4B.113C20, mR          | 100.26  | 1 |
| gb BL12.101F22F.060309T7 BL12 Nicotiana tabacum cDNA clone BL12.101F22, mRl         | 60.76   | 1 |
| tc Rep: Chromosome chr1 scaffold_5, whole genome shotgun sequence - Vitis vinif     | 60.84   | 1 |
| Unknown                                                                             | 797.22  | 1 |
| gb KL4B.102E08F.051125T7 KL4B Nicotiana tabacum cDNA clone KL4B.102E08, mR          | 186.45  | 1 |
| tc Rep: AT5g51450/MFG13_16 - Arabidopsis thaliana (Mouse-ear cress), partial (21    | 355.47  | 1 |
| Unknown                                                                             | 23.35   | 1 |
| gb FS433102 normalized full-length tobacco cDNA library Nicotiana tabacum cDNA      | 32.15   | 1 |
| gb KR2B.002I08F.051019T7 KR2B Nicotiana tabacum cDNA clone KR2B.002I08, mRl         | 112.6   | 1 |
| gb KT7C.104J03F.051219T7 KT7 Nicotiana tabacum cDNA clone KT7C.104J03, mRN          | 804.24  | 1 |
| gb KL4B.113D22F.060131T7 KL4B Nicotiana tabacum cDNA clone KL4B.113D22, mF          | 285.37  | 1 |
| gb KF8B.200N01F.060120T7 KF8 Nicotiana tabacum cDNA clone KF8B.200N01, mRl          | 18.26   | 1 |
| tc Rep: 40S ribosomal protein S15a-1 - Arabidopsis thaliana (Mouse-ear cress), corr | 122.62  | 1 |
| gb KR2B.001D18F.050815T7 KR2B Nicotiana tabacum cDNA clone KR2B.001D18, m           | 60.75   | 1 |
| Unknown                                                                             | 25.03   | 1 |
| tc Rep: Chromosome chr18 scaffold_1, whole genome shotgun sequence - Vitis vin      | 393.86  | 1 |
| Unknown                                                                             | 24.56   | 1 |
| tc Rep: EF hand family protein - Solanum demissum (Wild potato), partial (92%) [TC  | 1495.95 | 1 |

|                                                                                       |          |   |
|---------------------------------------------------------------------------------------|----------|---|
| tc Rep: Hypoxia-responsive family protein - Citrus sinensis (Sweet orange), partial ( | 1525.26  | 1 |
| gb KG9B.005C11F.050721T7 KG9B Nicotiana tabacum cDNA clone KG9B.005C11, r             | 32.55    | 1 |
| gb KP1B.101D02F.050722T7 KP1B Nicotiana tabacum cDNA clone KP1B.101D02, m             | 142.76   | 1 |
| gb KT7B.107E21F.060124T7 KT7 Nicotiana tabacum cDNA clone KT7B.107E21, mRN            | 3233.74  | 1 |
| tc Rep: GAMYB-like2 - Solanum lycopersicum (Tomato) (Lycopersicon esculentum),        | 1521.43  | 1 |
| gb EST_CSP004xc12f1.ab1 EST_CSP Nicotiana tabacum cDNA, mRNA sequence [EH             | 144.53   | 1 |
| tc Rep: Microsomal omega-6-desaturase - Nicotiana tabacum (Common tobacco), i         | 19400.15 | 1 |
| tc Rep: Chromosome chr6 scaffold_25, whole genome shotgun sequence - Vitis vin        | 121.41   | 1 |
| gb KF8B.201A19F.060124T7 KF8 Nicotiana tabacum cDNA clone KF8B.201A19, mRN            | 25.61    | 1 |
| gb AGN_PNL229af1_c1.trimmed.seq AGN_PNL Nicotiana tabacum cDNA 5', mRNA               | 22.82    | 1 |
| tc Rep: Alcohol dehydrogenase class III-like protein - Solanum tuberosum (Potato),    | 147.01   | 1 |
| tc Rep: Chromosome chr8 scaffold_23, whole genome shotgun sequence - Vitis vin        | 233.32   | 1 |
| tc Rep: Chromosome chr17 scaffold_101, whole genome shotgun sequence - Vitis v        | 524.46   | 1 |
| tc Rep: Chromosome chr11 scaffold_170, whole genome shotgun sequence - Vitis v        | 330.09   | 1 |
| gb TT-11_O20 Burley21 trichome library Nicotiana tabacum cDNA, mRNA sequence          | 80.04    | 1 |
| tc Rep: Hsp20.1 protein - Solanum peruvianum (Peruvian tomato) (Lycopersicon pe       | 136.28   | 1 |
| gb KR3B.104I14F.051108T7 KR3B Nicotiana tabacum cDNA clone KR3B.104I14, mRN           | 29.88    | 1 |
| Unknown                                                                               | 63.77    | 1 |
| gb KT7C.108D17F.051219T7 KT7 Nicotiana tabacum cDNA clone KT7C.108D17, mRN            | 370.39   | 1 |
| Unknown                                                                               | 36.56    | 1 |
| tc Rep: Chromosome chr7 scaffold_20, whole genome shotgun sequence - Vitis vin        | 1746.62  | 1 |
| tc Rep: Chromosome chr2 scaffold_132, whole genome shotgun sequence - Vitis vi        | 25.67    | 1 |
| gb CHO_SL015xd16f2.ab1 CHO_SL Nicotiana tabacum cDNA, mRNA sequence [EH6              | 254.85   | 1 |
| tc Rep: Chromosome chr14 scaffold_27, whole genome shotgun sequence - Vitis vi        | 1581.05  | 1 |
| gb N.tabacum mRNA for acidic chitinase PR-P [X51426]                                  | 58.22    | 1 |
| Unknown                                                                               | 57.82    | 1 |
| Unknown                                                                               | 128.62   | 1 |
| tc Rep: Chromosome chr1 scaffold_46, whole genome shotgun sequence - Vitis vin        | 239.07   | 1 |
| gb TT-36_L21 K326 early senescent leaf library Nicotiana tabacum cDNA, mRNA seq       | 22.76    | 1 |
| tc Rep: Ubiquitin carrier protein - Arachis hypogaea (Peanut), complete [TC48462]     | 141.68   | 1 |
| gb KF8C.105M11F.051215T7 KF8 Nicotiana tabacum cDNA clone KF8C.105M11, mRN            | 10276.9  | 1 |
| tc Rep: Chromosome chr5 scaffold_98, whole genome shotgun sequence - Vitis vin        | 99.97    | 1 |
| gb Nicotiana tabacum mRNA for ras-related protein RAB8-4, complete cds [AB079C        | 4421.82  | 1 |
| gb Nicotiana tabacum dehydroascorbate reductase (DHAR) mRNA, complete cds [A          | 84.34    | 1 |

|                                                                                     |         |   |
|-------------------------------------------------------------------------------------|---------|---|
| tc Rep: Protein kinase SRK - Nicotiana tabacum (Common tobacco), partial (44%) [T   | 26.81   | 1 |
| tc Rep: Chromosome chr8 scaffold_34, whole genome shotgun sequence - Vitis vin      | 184.3   | 1 |
| tc Rep: F5D14.18 protein - Arabidopsis thaliana (Mouse-ear cress), partial (15%) [T | 73.57   | 1 |
| Unknown                                                                             | 60.89   | 1 |
| tc Rep: Dynein light chain - Lupinus albus (White lupin), partial (71%) [TC70067]   | 77.66   | 1 |
| Unknown                                                                             | 37.17   | 1 |
| Unknown                                                                             | 180.22  | 1 |
| tc Rep: Osr40g2 protein - Oryza sativa (Rice), partial (27%) [TC56940]              | 1927.93 | 1 |
| Unknown                                                                             | 106.96  | 1 |
| Unknown                                                                             | 81.82   | 1 |
| tc Rep: MRNA, , clone: RAFL25-03-N20 - Arabidopsis thaliana (Mouse-ear cress), pa   | 235.49  | 1 |
| tc Rep: ALY protein - Nicotiana benthamiana, complete [TC50221]                     | 204.28  | 1 |
| gb KP1B.110G13F.050727T7 KP1B Nicotiana tabacum cDNA clone KP1B.110G13, m           | 31.44   | 1 |
| gb AGN_PNL222af1_c12.trimmed.seq AGN_PNL Nicotiana tabacum cDNA 5', mRN/            | 2897.67 | 1 |
| Unknown                                                                             | 263.69  | 1 |
| tc Rep: Chromosome chr2 scaffold_132, whole genome shotgun sequence - Vitis vi      | 1693.03 | 1 |
| gb FS417555 normalized full-length tobacco cDNA library Nicotiana tabacum cDNA      | 1007.85 | 1 |
| gb KP1B.001I21F.050628T7 KP1B Nicotiana tabacum cDNA clone KP1B.001I21, mRI         | 30.14   | 1 |
| gb TT-13_M02 K326 late senescent leaf library Nicotiana tabacum cDNA, mRNA sec      | 53.8    | 1 |
| gb EST_FLW001xk08f1.ab1 EST_FLW Nicotiana tabacum cDNA, mRNA sequence [Ei           | 37.99   | 1 |
| gb Nicotiana tabacum NtSIP2 mRNA for 6b-interacting protein 2, complete cds [AB.    | 49.89   | 1 |
| Unknown                                                                             | 2315.39 | 1 |
| tc Rep: At2g37790 - Arabidopsis thaliana (Mouse-ear cress), partial (50%) [TC4543C  | 72.91   | 1 |
| Unknown                                                                             | 95.36   | 1 |
| Unknown                                                                             | 37.04   | 1 |
| gb TT-04_H19 K326 trichome library Nicotiana tabacum cDNA, mRNA sequence [FC        | 135.36  | 1 |
| gb Nicotiana tabacum BYtuba mRNA for alpha tubulin, complete cds [AB052822]         | 45013.8 | 1 |
| Unknown                                                                             | 596.31  | 1 |
| Unknown                                                                             | 36.49   | 1 |
| tc Rep: Chromosome chr2 scaffold_11, whole genome shotgun sequence - Vitis vin      | 43.21   | 1 |
| gb AGN_RNC019x115f1.ab1 AGN_RNC Nicotiana tabacum cDNA 5', mRNA sequence            | 31.19   | 1 |
| tc Rep: Chromosome chr18 scaffold_1, whole genome shotgun sequence - Vitis vin      | 3250.42 | 1 |
| gb KG9B.001O11F.050628T7 KG9B Nicotiana tabacum cDNA clone KG9B.001O11, r           | 25.16   | 1 |
| tc Rep: Predicted protein - Chaetomium globosum (Soil fungus), partial (10%) [TC62  | 110.69  | 1 |

|                                                                                    |          |   |
|------------------------------------------------------------------------------------|----------|---|
| Unknown                                                                            | 87.55    | 1 |
| gb CHO_SL015xd16f2.ab1 CHO_SL Nicotiana tabacum cDNA, mRNA sequence [EH6           | 3250.31  | 1 |
| gb Nicotiana tabacum ferritin 2 (Fer2) mRNA, complete cds [AY141105]               | 66.66    | 1 |
| Unknown                                                                            | 153.66   | 1 |
| gb KL4B.110M02F.051106T7 KL4B Nicotiana tabacum cDNA clone KL4B.110M02, r          | 118.1    | 1 |
| tc Rep: 1,4-alpha-glucan branching enzyme - Solanum tuberosum (Potato), partial (  | 27.85    | 1 |
| Unknown                                                                            | 42.81    | 1 |
| tc Rep: Chromosome chr14 scaffold_21, whole genome shotgun sequence - Vitis vi     | 227.01   | 1 |
| tc Rep: Chromosome chr9 scaffold_7, whole genome shotgun sequence - Vitis vinif    | 154.41   | 1 |
| Unknown                                                                            | 114.1    | 1 |
| gb KG9B.102A05F.051126T7 KG9B Nicotiana tabacum cDNA clone KG9B.102A05, n          | 68.39    | 1 |
| gb KF8C.106G13F.051215T7 KF8 Nicotiana tabacum cDNA clone KF8C.106G13, mRI         | 296.41   | 1 |
| tc Rep: Chromosome chr19 scaffold_4, whole genome shotgun sequence - Vitis vin     | 7331.72  | 1 |
| tc Rep: Programmed cell death protein 6 (Probable calcium-binding protein ALG- 2,  | 39.06    | 1 |
| gb TT-09_H15 Burley21 trichome library Nicotiana tabacum cDNA, mRNA sequence       | 172.64   | 1 |
| gb AGN_ELP012xa20f1.ab1 AGN_ELP Nicotiana tabacum cDNA 5', mRNA sequence           | 40.92    | 1 |
| tc Rep: Protein tyrosine phosphatase - Phaseolus vulgaris (Kidney bean) (French be | 23.38    | 1 |
| tc Rep: Chromosome chr18 scaffold_61, whole genome shotgun sequence - Vitis vi     | 62.37    | 1 |
| Unknown                                                                            | 142.34   | 1 |
| gb AM818654 COL, cold overnight library Nicotiana tabacum cDNA clone nt006195      | 8090.53  | 1 |
| Unknown                                                                            | 48.24    | 1 |
| Unknown                                                                            | 32.29    | 1 |
| gb Nicotiana tabacum proline oxidase [AY639146]                                    | 1421.62  | 1 |
| tc Rep: Chromosome chr16 scaffold_86, whole genome shotgun sequence - Vitis vi     | 35667.85 | 1 |
| gb TOBESTR029D10 TOBEST cDNA library 1 Nicotiana tabacum cDNA 5', mRNA seq         | 861.47   | 1 |
| Unknown                                                                            | 743.11   | 1 |
| tc Rep: Chromosome chr12 scaffold_47, whole genome shotgun sequence - Vitis vi     | 1512.29  | 1 |
| gb AGN_RNC102xe07f1.ab1 AGN_RNC Nicotiana tabacum cDNA 5', mRNA sequenc            | 27.64    | 1 |
| gb KF8C.105M04F.051215T7 KF8 Nicotiana tabacum cDNA clone KF8C.105M04, mF          | 60.19    | 1 |
| gb BP136083 MAT001 Nicotiana tabacum cDNA clone BY8654, mRNA sequence [BF          | 27.51    | 1 |
| gb KG9B.103K10F.051128T7 KG9B Nicotiana tabacum cDNA clone KG9B.103K10, m          | 273.56   | 1 |
| Unknown                                                                            | 883.96   | 1 |
| tc Rep: Chromosome chr10 scaffold_179, whole genome shotgun sequence - Vitis v     | 588.21   | 1 |
| gb TT-35_J14 Burley21 trichome library Nicotiana tabacum cDNA, mRNA sequence       | 23.47    | 1 |

|                                                                                   |         |   |
|-----------------------------------------------------------------------------------|---------|---|
| tc Rep: Chromosome chr4 scaffold_6, whole genome shotgun sequence - Vitis vinif   | 1455.18 | 1 |
| gb AM817228 seedling library, SL Nicotiana tabacum cDNA clone nt002051027, mF     | 43      | 1 |
| gb KR3B.110P06F.051111T7 KR3B Nicotiana tabacum cDNA clone KR3B.110P06, ml        | 82.33   | 1 |
| tc Rep: WERBP-1 protein - Nicotiana tabacum (Common tobacco), partial (41%) [TC   | 300.09  | 1 |
| Unknown                                                                           | 21.3    | 1 |
| gb KT7C.104G04F.051219T7 KT7 Nicotiana tabacum cDNA clone KT7C.104G04, mR         | 64.02   | 1 |
| gb CHO_SL022xd02f1.ab1 CHO_SL Nicotiana tabacum cDNA, mRNA sequence [EH6          | 538.11  | 1 |
| Unknown                                                                           | 65.88   | 1 |
| Unknown                                                                           | 4056.6  | 1 |
| Unknown                                                                           | 128.88  | 1 |
| gb CHO_SL010xj06f1.ab1 CHO_SL Nicotiana tabacum cDNA, mRNA sequence [EH61         | 610.13  | 1 |
| gb TT-24_E16 K326 late senescent leaf library Nicotiana tabacum cDNA, mRNA seq    | 86.19   | 1 |
| tc Rep: Chromosome undetermined scaffold_77, whole genome shotgun sequence        | 527.18  | 1 |
| gb FS418200 normalized full-length tobacco cDNA library Nicotiana tabacum cDNA    | 179.97  | 1 |
| gb KL4B.104J05F.051104T7 KL4B Nicotiana tabacum cDNA clone KL4B.104J05, mRN       | 97.09   | 1 |
| tc Rep: RNA Binding Protein 45 - Nicotiana plumbaginifolia (Leadwort-leaved tobac | 215.72  | 1 |
| Unknown                                                                           | 32.28   | 1 |
| Unknown                                                                           | 1449.64 | 1 |
| gb KT7B.107B02F.060124T7 KT7 Nicotiana tabacum cDNA clone KT7B.107B02, mRf        | 56.64   | 1 |
| gb KR3B.102G14F.051107T7 KR3B Nicotiana tabacum cDNA clone KR3B.102G14, m         | 174.41  | 1 |
| tc Rep: Chromosome chr7 scaffold_31, whole genome shotgun sequence - Vitis vin    | 21.95   | 1 |
| tc Rep: Chromosome chr18 scaffold_1, whole genome shotgun sequence - Vitis vin    | 3230.48 | 1 |
| tc Rep: Chromosome chr1 scaffold_5, whole genome shotgun sequence - Vitis vinif   | 124.11  | 1 |
| gb KL5B.103C20F.060207T7 KL5B Nicotiana tabacum cDNA clone KL5B.103C20, mR        | 51.66   | 1 |
| gb TT-38_G14 tobacco leaf library Nicotiana tabacum cDNA, mRNA sequence [FG6:     | 39.67   | 1 |
| tc Rep: Chromosome chr9 scaffold_104, whole genome shotgun sequence - Vitis vi    | 22.59   | 1 |
| gb KR2B.112G07F.051230T7 KR2B Nicotiana tabacum cDNA clone KR2B.112G07, m         | 941.8   | 1 |
| tc Rep: Chromosome chr14 scaffold_54, whole genome shotgun sequence - Vitis vi    | 280.71  | 1 |
| Unknown                                                                           | 155.4   | 1 |
| gb KG9B.105A06F.051128T7 KG9B Nicotiana tabacum cDNA clone KG9B.105A06, n         | 45.3    | 1 |
| gb KP1B.109H16F.050727T7 KP1B Nicotiana tabacum cDNA clone KP1B.109H16, m         | 662.92  | 1 |
| gb Nicotiana tabacum Ntmy170 mRNA for myosin XI, complete cds [AB180675]          | 32.52   | 1 |
| gb AGN_RNC025xc19f1.ab1 AGN_RNC Nicotiana tabacum cDNA 5', mRNA sequenc           | 178.14  | 1 |
| gb Nicotiana tabacum mRNA for FtsZ-like chloroplast protein [AJ133453]            | 74.51   | 1 |

|                                                                                      |         |   |
|--------------------------------------------------------------------------------------|---------|---|
| Unknown                                                                              | 46.13   | 1 |
| tc Rep: Chromosome chr7 scaffold_20, whole genome shotgun sequence - Vitis vin       | 52.46   | 1 |
| gb KG9B.003K23F.050720T7 KG9B Nicotiana tabacum cDNA clone KG9B.003K23, m            | 22.2    | 1 |
| tc Rep: HrcQ - Pseudomonas cichorii, partial (5%) [TC42590]                          | 25.7    | 1 |
| Unknown                                                                              | 21.05   | 1 |
| tc Rep: Cell growth defect factor-like - Solanum tuberosum (Potato), partial (59%) [ | 268.25  | 1 |
| Unknown                                                                              | 506.32  | 1 |
| Unknown                                                                              | 133.84  | 1 |
| Unknown                                                                              | 39.61   | 1 |
| gb BP530047 MAT005 Nicotiana tabacum cDNA clone BY21025, mRNA sequence [E            | 101.46  | 1 |
| tc Rep: Elongation factor 1-alpha - Nicotiana paniculata, partial (23%) [TC64911]    | 642.78  | 1 |
| tc Rep: Chromosome chr2 scaffold_112, whole genome shotgun sequence - Vitis vi       | 32.73   | 1 |
| gb AGN_RNC012xl06f1.ab1 AGN_RNC Nicotiana tabacum cDNA 5', mRNA sequence             | 34.12   | 1 |
| Unknown                                                                              | 613.06  | 1 |
| tc Rep: Acetolactate synthase 2, chloroplast precursor - Nicotiana tabacum (Comm     | 56.01   | 1 |
| tc Rep: Chromosome chr14 scaffold_211, whole genome shotgun sequence - Vitis v       | 66.13   | 1 |
| tc Rep: Chromosome chr15 scaffold_37, whole genome shotgun sequence - Vitis vi       | 22.45   | 1 |
| gb KG9B.001B09F.050628T7 KG9B Nicotiana tabacum cDNA clone KG9B.001B09, r            | 137.08  | 1 |
| Unknown                                                                              | 732.68  | 1 |
| tc Rep: MYBR6 - Malus domestica (Apple) (Malus sylvestris), partial (22%) [TC6069;   | 41.32   | 1 |
| gb AGN_ELP014xl20f1.ab1 AGN_ELP Nicotiana tabacum cDNA 5', mRNA sequence             | 100.81  | 1 |
| gb TT-05_H10 K326 early senescent leaf library Nicotiana tabacum cDNA, mRNA se       | 21.5    | 1 |
| tc Rep: Chromosome chr8 scaffold_29, whole genome shotgun sequence - Vitis vin       | 2265.77 | 1 |
| gb AGN_RNC211xf15f1.ab1 AGN_RNC Nicotiana tabacum cDNA 5', mRNA sequenc              | 220.98  | 1 |
| Unknown                                                                              | 38.81   | 1 |
| gb 18.2F04 Transformed tobacco Lambda Zap II library Nicotiana tabacum cDNA 5',      | 35.19   | 1 |
| tc Rep: Chromosome chr11 scaffold_170, whole genome shotgun sequence - Vitis v       | 103.7   | 1 |
| gb TT-05_B15 Burley21 trichome library Nicotiana tabacum cDNA, mRNA sequence         | 70.51   | 1 |
| tc Rep: Arabinosidase ARA-1 - Solanum lycopersicum (Tomato) (Lycopersicon escul      | 2342.78 | 1 |
| tc Rep: Histone H3 - Vitis vinifera (Grape), complete [TC47864]                      | 205.94  | 1 |
| gb KN6B.102G17F.051230T7 KN6B Nicotiana tabacum cDNA clone KN6B.102G17, r            | 75.59   | 1 |
| tc Rep: Dihydrolipoamide dehydrogenase precursor - Solanum tuberosum (Potato),       | 2184.06 | 1 |
| gb N.tabacum mRNA for subunit of NADH:ubiquinone oxidoreductase complex I [YI        | 617.81  | 1 |
| tc Rep: Chromosome undetermined scaffold_127, whole genome shotgun sequenc           | 46.93   | 1 |



|                                                                                      |         |   |
|--------------------------------------------------------------------------------------|---------|---|
| tc Rep: Chromosome chr13 scaffold_48, whole genome shotgun sequence - Vitis vi       | 20.79   | 1 |
| Unknown                                                                              | 63.24   | 1 |
| tc Rep: 40S ribosomal protein S2-3 - Arabidopsis thaliana (Mouse-ear cress), partial | 570.84  | 1 |
| gb KG9B.107L18F.060120T7 KG9B Nicotiana tabacum cDNA clone KG9B.107L18, m            | 711.14  | 1 |
| tc Rep: Ribosome recycling factor, chloroplast precursor - Daucus carota (Carrot), p | 27.51   | 1 |
| tc Rep: Chromosome chr1 scaffold_46, whole genome shotgun sequence - Vitis vin       | 103.13  | 1 |
| Unknown                                                                              | 103.31  | 1 |
| gb BP526432 MAT001 Nicotiana tabacum cDNA clone BY11154, mRNA sequence [E            | 54.71   | 1 |
| Unknown                                                                              | 985.56  | 1 |
| Unknown                                                                              | 25.89   | 1 |
| gb D58-BG10 Ethylene Induced Tobacco Leaf cDNA Library Nicotiana tabacum cDN.        | 22.84   | 1 |
| gb KR2B.115M23F.051230T7 KR2B Nicotiana tabacum cDNA clone KR2B.115M23, r            | 95.04   | 1 |
| tc Rep: Chromosome chr14 scaffold_21, whole genome shotgun sequence - Vitis vi       | 26.6    | 1 |
| Unknown                                                                              | 11236.9 | 1 |
| gb KR3B.112G18F.060119T7 KR3B Nicotiana tabacum cDNA clone KR3B.112G18, m            | 48.21   | 1 |
| gb TT-49_L17 K326 late senescent leaf library Nicotiana tabacum cDNA, mRNA seqi      | 517.19  | 1 |
| gb Nicotiana tabacum geranylgeranylated protein NTGP3 mRNA, complete cds [U6         | 79.1    | 1 |
| tc Rep: BTF3 - Nicotiana benthamiana, partial (75%) [TC52337]                        | 133.31  | 1 |
| Unknown                                                                              | 11169.6 | 1 |
| gb BP135456 MAT001 Nicotiana tabacum cDNA clone BY7971, mRNA sequence [Bf            | 17.71   | 1 |
| gb KP1B.001O09F.050628T7 KP1B Nicotiana tabacum cDNA clone KP1B.001O09, m            | 104.22  | 1 |
| gb AGN_RNC119xm14f1.ab1 AGN_RNC Nicotiana tabacum cDNA 5', mRNA sequen               | 3007.76 | 1 |
| tc Rep: Chromosome chr17 scaffold_16, whole genome shotgun sequence - Vitis vi       | 45.01   | 1 |
| Unknown                                                                              | 35.54   | 1 |
| gb KR3B.101G24F.051107T7 KR3B Nicotiana tabacum cDNA clone KR3B.101G24, m            | 118.42  | 1 |
| tc Rep: Cytochrome c1-1, heme protein, mitochondrial precursor - Solanum tubero      | 3125.59 | 1 |
| gb TOBESTR027A02 TOBEST cDNA library 1 Nicotiana tabacum cDNA 5', mRNA seqi          | 97.31   | 1 |
| tc Rep: Chromosome undetermined scaffold_342, whole genome shotgun sequenc           | 433.96  | 1 |
| tc Rep: VAP27 - Nicotiana plumbaginifolia (Leadwort-leaved tobacco), partial (46%)   | 219.72  | 1 |
| Unknown                                                                              | 102.45  | 1 |
| Unknown                                                                              | 20.27   | 1 |
| tc Rep: Pollen coat-like protein - Camellia sinensis (Tea), complete [TC60885]       | 53.76   | 1 |
| tc Rep: Chromosome chr14 scaffold_21, whole genome shotgun sequence - Vitis vi       | 250.39  | 1 |
| Unknown                                                                              | 2558.73 | 1 |

|                                                                                     |         |   |
|-------------------------------------------------------------------------------------|---------|---|
| gb AGN_RNC127xg02f1.ab1 AGN_RNC Nicotiana tabacum cDNA 5', mRNA sequenc             | 8515.05 | 1 |
| gb TT-08_G07 tobacco leaf library Nicotiana tabacum cDNA, mRNA sequence [FG6:       | 137.6   | 1 |
| Unknown                                                                             | 127.35  | 1 |
| gb AM791244 DL, diurnal library Nicotiana tabacum cDNA clone nt005034008, mRI       | 61.36   | 1 |
| Unknown                                                                             | 926.76  | 1 |
| gb Nicotiana tabacum ethylene receptor ETR1 homolog mRNA, complete cds [AF02        | 155.95  | 1 |
| gb Tobacco mRNA fragment for nitrate reductase [X06134]                             | 51.64   | 1 |
| gb BP134784 MAT001 Nicotiana tabacum cDNA clone BY7223, mRNA sequence [BF           | 29.88   | 1 |
| tc Rep: Translationally-controlled tumor protein homolog - Nicotiana tabacum (Cor   | 1592.24 | 1 |
| tc Rep: GAGA-motif binding transcriptional activator - Populus trichocarpa (Wester  | 22.42   | 1 |
| tc Rep: Probable N(2),N(2)-dimethylguanosine tRNA methyltransferase (tRNA(guar      | 32.52   | 1 |
| tc Rep: Chromosome chr10 scaffold_43, whole genome shotgun sequence - Vitis vi      | 480.4   | 1 |
| tc Rep: Chromosome chr18 scaffold_1, whole genome shotgun sequence - Vitis vin      | 1111.53 | 1 |
| gb Nicotiana tabacum NtRSH1 mRNA for RelA-SpoT like protein RSH1, complete cd       | 152.68  | 1 |
| gb KT7C.106E15F.051219T7 KT7 Nicotiana tabacum cDNA clone KT7C.106E15, mRN          | 2198.65 | 1 |
| tc Rep: Chromosome chr4 scaffold_83, whole genome shotgun sequence - Vitis vin      | 210.01  | 1 |
| Unknown                                                                             | 67.49   | 1 |
| gb Nicotiana tabacum NtNRT1.2-t mRNA for nitrate transporter, complete cds [AB1     | 39.97   | 1 |
| tc Rep: Chromosome chr1 scaffold_5, whole genome shotgun sequence - Vitis vinif     | 138.79  | 1 |
| Unknown                                                                             | 32.43   | 1 |
| gb Nicotiana tabacum mRNA for putative putative beta-(1,2)-xylosyltransferase (xy   | 35.33   | 1 |
| tc Rep: Chromosome chr8 scaffold_115, whole genome shotgun sequence - Vitis vi      | 24.81   | 1 |
| tc Rep: Eukaryotic peptide chain release factor subunit 1-3-like - Solanum tuberosu | 43.73   | 1 |
| tc Rep: Chromosome chr7 scaffold_31, whole genome shotgun sequence - Vitis vin      | 153.7   | 1 |
| tc Rep: Chromosome chr7 scaffold_31, whole genome shotgun sequence - Vitis vin      | 697.48  | 1 |
| tc Rep: Chromosome chr11 scaffold_13, whole genome shotgun sequence - Vitis vi      | 949.81  | 1 |
| gb Nicotiana tabacum inosine-5'-phosphate dehydrogenase (guaB) mRNA, partial c      | 27.68   | 1 |
| tc Rep: Chromosome chr6 scaffold_3, whole genome shotgun sequence - Vitis vinif     | 444.11  | 1 |
| gb TT-19_E12 K326 trichome library Nicotiana tabacum cDNA, mRNA sequence [FG        | 122.87  | 1 |
| gb BL12.103G21F.060309T7 BL12 Nicotiana tabacum cDNA clone BL12.103G21, mF          | 1574.71 | 1 |
| Unknown                                                                             | 2403.4  | 1 |
| Unknown                                                                             | 547.32  | 1 |
| tc Rep: Signal recognition particle 54 kDa protein 1 - Solanum lycopersicum (Tomat  | 3086.07 | 1 |
| Unknown                                                                             | 64.26   | 1 |

|                                                                                        |          |   |
|----------------------------------------------------------------------------------------|----------|---|
| gb AGN_PNL210bf1_h6.trimmed.seq AGN_PNL Nicotiana tabacum cDNA 5', mRNA                | 40.39    | 1 |
| tc Rep: Chromosome chr2 scaffold_105, whole genome shotgun sequence - Vitis vinifera   | 37344.75 | 1 |
| Unknown                                                                                | 357.87   | 1 |
| gb KF8C.104K10F.051214T7 KF8 Nicotiana tabacum cDNA clone KF8C.104K10, mRNA            | 18.22    | 1 |
| tc Rep: Ornithine decarboxylase - Nicotiana tabacum (Common tobacco), complete         | 8147.9   | 1 |
| Unknown                                                                                | 238.78   | 1 |
| gb KF8B.201I20F.060124T7 KF8 Nicotiana tabacum cDNA clone KF8B.201I20, mRNA            | 37.49    | 1 |
| tc Rep: Chromosome undetermined scaffold_310, whole genome shotgun sequence            | 1758.99  | 1 |
| gb AGN_RNC013xe15f1.ab1 AGN_RNC Nicotiana tabacum cDNA 5', mRNA sequence               | 805.97   | 1 |
| tc Rep: 5-phosphoribosyl-1-pyrophosphate amidotransferase - Nicotiana tabacum          | 3106.04  | 1 |
| tc Rep: Chromosome chr6 scaffold_15, whole genome shotgun sequence - Vitis vinifera    | 94.63    | 1 |
| tc Rep: Alcohol dehydrogenase - Nicotiana tabacum (Common tobacco), partial (69        | 2923.73  | 1 |
| gb AGN_RPC014xb03f1.ab1 AGN_RPC Nicotiana tabacum cDNA 5', mRNA sequence               | 837.96   | 1 |
| Unknown                                                                                | 1037.89  | 1 |
| tc Rep: Actin-97 - Solanum tuberosum (Potato), partial (57%) [TC46429]                 | 52085.95 | 1 |
| tc Rep: Fiber protein Fb2 - Gossypium barbadense (Sea-island cotton) (Egyptian cotton) | 4588.84  | 1 |
| gb KT7C.104B19F.051219T7 KT7 Nicotiana tabacum cDNA clone KT7C.104B19, mRNA            | 2623.76  | 1 |
| tc Rep: Chromosome chr18 scaffold_1, whole genome shotgun sequence - Vitis vinifera    | 425.54   | 1 |
| tc Rep: RelA-SpoT like protein RSH1 - Nicotiana tabacum (Common tobacco), partial      | 35.97    | 1 |
| Unknown                                                                                | 127.91   | 1 |
| Unknown                                                                                | 22.98    | 1 |
| tc Rep: Chromosome chr18 scaffold_1, whole genome shotgun sequence - Vitis vinifera    | 524.61   | 1 |
| Unknown                                                                                | 21.01    | 1 |
| gb KN6B.103D20F.060103T7 KN6B Nicotiana tabacum cDNA clone KN6B.103D20, mRNA           | 69.03    | 1 |
| gb KL4B.103N16F.051103T7 KL4B Nicotiana tabacum cDNA clone KL4B.103N16, mRNA           | 178.26   | 1 |
| gb KN6B.104L12F.060103T7 KN6B Nicotiana tabacum cDNA clone KN6B.104L12, mRNA           | 74.13    | 1 |
| gb KF8B.100B18F.151010T7 KF8 Nicotiana tabacum cDNA clone KF8B.100B18, mRNA            | 261.38   | 1 |
| gb BP530524 MAT005 Nicotiana tabacum cDNA clone BY22160, mRNA sequence [E              | 43.06    | 1 |
| tc Rep: Uncharacterized protein At5g64816 precursor - Arabidopsis thaliana (Mouse)     | 57.29    | 1 |
| Unknown                                                                                | 18.99    | 1 |
| gb KN6B.101O14F.051230T7 KN6B Nicotiana tabacum cDNA clone KN6B.101O14, mRNA           | 228.72   | 1 |
| gb AGN_RNC010xl14f1.ab1 AGN_RNC Nicotiana tabacum cDNA 5', mRNA sequence               | 50.25    | 1 |
| Unknown                                                                                | 52.15    | 1 |
| tc Rep: Chromosome chr8 scaffold_34, whole genome shotgun sequence - Vitis vinifera    | 274.4    | 1 |

|                                                                                        |         |   |
|----------------------------------------------------------------------------------------|---------|---|
| Unknown                                                                                | 269.6   | 1 |
| Unknown                                                                                | 49.61   | 1 |
| gb KL4B.104E10F.051104T7 KL4B Nicotiana tabacum cDNA clone KL4B.104E10, mR             | 24.42   | 1 |
| tc Rep: Chromosome chr14 scaffold_27, whole genome shotgun sequence - Vitis vi         | 1751.31 | 1 |
| Unknown                                                                                | 22.28   | 1 |
| tc Rep: CXE carboxylesterase - Actinidia eriantha, partial (45%) [TC41276]             | 72.36   | 1 |
| tc Rep: Chromosome chr17 scaffold_263, whole genome shotgun sequence - Vitis v         | 101.08  | 1 |
| tc Rep: Chromosome chr16 scaffold_86, whole genome shotgun sequence - Vitis vi         | 34.28   | 1 |
| tc Rep: Glycolipid transfer protein-like - Oryza sativa subsp. japonica (Rice), comple | 22.46   | 1 |
| gb KT7C.106G23F.051219T7 KT7 Nicotiana tabacum cDNA clone KT7C.106G23, mR              | 1531.46 | 1 |
| gb KT7C.106D22F.051219T7 KT7 Nicotiana tabacum cDNA clone KT7C.106D22, mRl             | 42.08   | 1 |
| gb KG9B.004D19F.050721T7 KG9B Nicotiana tabacum cDNA clone KG9B.004D19, n              | 35.21   | 1 |
| Unknown                                                                                | 29.77   | 1 |
| tc Rep: Alpha chain of nascent polypeptide associated complex - Nicotiana benthar      | 221.25  | 1 |
| tc Rep: Chromosome chr18 scaffold_1, whole genome shotgun sequence - Vitis vin         | 505.94  | 1 |
| Unknown                                                                                | 42.34   | 1 |
| Unknown                                                                                | 147.46  | 1 |
| Unknown                                                                                | 350.87  | 1 |
| tc Rep: Chromosome chr19 scaffold_126, whole genome shotgun sequence - Vitis v         | 22.69   | 1 |
| gb KN6B.103F12F.060103T7 KN6B Nicotiana tabacum cDNA clone KN6B.103F12, m              | 3982.48 | 1 |
| gb AM819871 COL, cold overnight library Nicotiana tabacum cDNA clone nt006113          | 739.78  | 1 |
| Unknown                                                                                | 52.18   | 1 |
| Unknown                                                                                | 104.26  | 1 |
| gb Nicotiana tabacum mRNA for putative rac protein (rac gene) [AJ250174]               | 4727.28 | 1 |
| Unknown                                                                                | 131.88  | 1 |
| gb AGN_ELP019xb01f1.ab1 AGN_ELP Nicotiana tabacum cDNA 5', mRNA sequence               | 31.26   | 1 |
| Unknown                                                                                | 133.78  | 1 |
| gb AM799412 DL, diurnal library Nicotiana tabacum cDNA clone nt005141043, mRl          | 244.03  | 1 |
| gb TT-25_E01 tobacco leaf library Nicotiana tabacum cDNA, mRNA sequence [FG63          | 42.74   | 1 |
| Unknown                                                                                | 219.25  | 1 |
| tc Rep: Mutator-like transposase - Arabidopsis thaliana (Mouse-ear cress), partial (:  | 46.67   | 1 |
| gb KG9B.001P01F.050628T7 KG9B Nicotiana tabacum cDNA clone KG9B.001P01, m              | 519.54  | 1 |
| gb CHO_SL015xj07f2.ab1 CHO_SL Nicotiana tabacum cDNA, mRNA sequence [EH61              | 98.37   | 1 |
| gb KP1B.102O16F.050722T7 KP1B Nicotiana tabacum cDNA clone KP1B.102O16, m              | 51.81   | 1 |

|                                                                                    |         |   |
|------------------------------------------------------------------------------------|---------|---|
| tc Rep: Fiber protein Fb2 - Gossypium barbadense (Sea-island cotton) (Egyptian cot | 7543.15 | 1 |
| tc Rep: Chromosome chr5 scaffold_2, whole genome shotgun sequence - Vitis vinif    | 2732.06 | 1 |
| Unknown                                                                            | 675.07  | 1 |
| Unknown                                                                            | 64.24   | 1 |
| Unknown                                                                            | 142.52  | 1 |
| gb KG9B.105G09F.051128T7 KG9B Nicotiana tabacum cDNA clone KG9B.105G09, n          | 67.83   | 1 |
| gb KP1B.101G22F.050722T7 KP1B Nicotiana tabacum cDNA clone KP1B.101G22, m          | 180.4   | 1 |
| Unknown                                                                            | 27.81   | 1 |
| gb AGN_RNC009xp18f1.ab1 AGN_RNC Nicotiana tabacum cDNA 5', mRNA sequenc            | 535.98  | 1 |
| gb TT-07_N14 K326 late senescent leaf library Nicotiana tabacum cDNA, mRNA seq     | 639.88  | 1 |
| gb TT-47_D12 K326 late senescent leaf library Nicotiana tabacum cDNA, mRNA seq     | 31.88   | 1 |
| gb KG9B.004D22F.050721T7 KG9B Nicotiana tabacum cDNA clone KG9B.004D22, n          | 87.17   | 1 |
| Unknown                                                                            | 169.13  | 1 |
| Unknown                                                                            | 71.6    | 1 |
| gb KP1B.101D12F.050722T7 KP1B Nicotiana tabacum cDNA clone KP1B.101D12, m          | 87.1    | 1 |
| Unknown                                                                            | 418.51  | 1 |
| tc Rep: Protein kinase Ck2 regulatory subunit 2 - Nicotiana tabacum (Common toba   | 1577.51 | 1 |
| Unknown                                                                            | 231.18  | 1 |
| Unknown                                                                            | 290.69  | 1 |
| Unknown                                                                            | 26.88   | 1 |
| tc Rep: Chromosome chr8 scaffold_106, whole genome shotgun sequence - Vitis vi     | 2828.68 | 1 |
| Unknown                                                                            | 852.76  | 1 |
| gb KT7C.110K14F.051221T7 KT7 Nicotiana tabacum cDNA clone KT7C.110K14, mRN         | 642.46  | 1 |
| Unknown                                                                            | 79.44   | 1 |
| Unknown                                                                            | 673.9   | 1 |
| tc Rep: Chromosome chr15 scaffold_19, whole genome shotgun sequence - Vitis vi     | 28.83   | 1 |
| gb TT-36_B15 Samsun trichome library Nicotiana tabacum cDNA, mRNA sequence         | 188.01  | 1 |
| gb TT-07_I07 Burley21 trichome library Nicotiana tabacum cDNA, mRNA sequence       | 103.45  | 1 |
| Unknown                                                                            | 5765.34 | 1 |
| Unknown                                                                            | 18.67   | 1 |
| gb CHO_SL009xa08f1.ab1 CHO_SL Nicotiana tabacum cDNA, mRNA sequence [EH6           | 829.83  | 1 |
| tc Rep: Chromosome chr16 scaffold_10, whole genome shotgun sequence - Vitis vi     | 61.69   | 1 |
| tc Rep: Chromosome chr2 scaffold_187, whole genome shotgun sequence - Vitis vi     | 1988.29 | 1 |
| Unknown                                                                            | 609.44  | 1 |

|                                                                                         |         |   |
|-----------------------------------------------------------------------------------------|---------|---|
| Unknown                                                                                 | 22.62   | 1 |
| gb KL4B.108P19F.051105T7 KL4B Nicotiana tabacum cDNA clone KL4B.108P19, mR              | 9701.21 | 1 |
| tc AAD10662.1 - Arabidopsis thaliana (Mouse-ear cress), partial (58%) [TC67894]         | 238.19  | 1 |
| tc Rep: Chromosome chr1 scaffold_46, whole genome shotgun sequence - Vitis vin          | 858.77  | 1 |
| gb TT-09_G07 K326 late senescent leaf library Nicotiana tabacum cDNA, mRNA seq          | 26.69   | 1 |
| tc Rep: Chromosome chr8 scaffold_34, whole genome shotgun sequence - Vitis vin          | 168.3   | 1 |
| gb KP1B.103M16F.050725T7 KP1B Nicotiana tabacum cDNA clone KP1B.103M16, r               | 52.36   | 1 |
| gb TT-06_H17 Burley21 trichome library Nicotiana tabacum cDNA, mRNA sequence            | 26.96   | 1 |
| gb AGN_PNL226cf1_g4.trimmed.seq AGN_PNL Nicotiana tabacum cDNA 5', mRNA                 | 80.56   | 1 |
| gb Nicotiana tabacum cig2 mRNA, complete cds [AB031321]                                 | 81.52   | 1 |
| gb KL4B.105B03F.051104T7 KL4B Nicotiana tabacum cDNA clone KL4B.105B03, mR              | 147.87  | 1 |
| tc Rep: Chromosome chr18 scaffold_1, whole genome shotgun sequence - Vitis vin          | 324.64  | 1 |
| Unknown                                                                                 | 88.02   | 1 |
| Unknown                                                                                 | 84.47   | 1 |
| gb AGN_RNC001xi15f1.ab1 AGN_RNC Nicotiana tabacum cDNA 5', mRNA sequenc                 | 17.09   | 1 |
| Unknown                                                                                 | 21.83   | 1 |
| gb KF8C.105P02F.051215T7 KF8 Nicotiana tabacum cDNA clone KF8C.105P02, mRN              | 143.22  | 1 |
| Unknown                                                                                 | 35.46   | 1 |
| gb AGN_RPC004xg02f1.ab1 AGN_RPC Nicotiana tabacum cDNA 5', mRNA sequenc                 | 18.59   | 1 |
| tc Rep: GAL83 - Nicotiana attenuata, partial (77%) [TC57681]                            | 79.52   | 1 |
| Unknown                                                                                 | 23.15   | 1 |
| gb AGN_PNL209cr1_a3.trimmed.seq AGN_PNL Nicotiana tabacum cDNA 3', mRNA                 | 18.82   | 1 |
| tc Rep: Vicilin-like storage protein - Picea glauca (White spruce), partial (22%) [TC4: | 114.94  | 1 |
| tc Rep: 30S ribosomal protein S6 alpha, chloroplast precursor [Contains: 30S riboso     | 100.72  | 1 |
| Unknown                                                                                 | 30.58   | 1 |
| gb KG9B.106J08F.051129T7 KG9B Nicotiana tabacum cDNA clone KG9B.106J08, mF              | 85.09   | 1 |
| Unknown                                                                                 | 914.99  | 1 |
| Unknown                                                                                 | 222.66  | 1 |
| gb BP529347 MAT001 Nicotiana tabacum cDNA clone BY14241, mRNA sequence [E               | 392.9   | 1 |
| Unknown                                                                                 | 151.39  | 1 |
| gb Nicotiana tabacum sterol-C5(6)-desaturase mRNA, complete cds [AF081794]              | 152.85  | 1 |
| tc Rep: Chromosome chr5 scaffold_156, whole genome shotgun sequence - Vitis vi          | 20.25   | 1 |
| gb BL12.104M18F.060309T7 BL12 Nicotiana tabacum cDNA clone BL12.104M18, m               | 210.29  | 1 |
| gb AGN_RNC009xh05f1.ab1 AGN_RNC Nicotiana tabacum cDNA 5', mRNA sequenc                 | 47.8    | 1 |

|                                                                                       |          |   |
|---------------------------------------------------------------------------------------|----------|---|
| Unknown                                                                               | 1117.07  | 1 |
| Unknown                                                                               | 41.92    | 1 |
| gb AM840784 COL, cold overnight library Nicotiana tabacum cDNA clone nt006214         | 224.21   | 1 |
| Unknown                                                                               | 275.79   | 1 |
| gb AM830869 seedling library, SL Nicotiana tabacum cDNA clone nt002031015, mF         | 70.53    | 1 |
| gb CHO_SL017xb07f1.ab1 CHO_SL Nicotiana tabacum cDNA, mRNA sequence [EH6              | 742.85   | 1 |
| Unknown                                                                               | 217.12   | 1 |
| gb TT-06_C03 Samsun trichome library Nicotiana tabacum cDNA, mRNA sequence            | 196.15   | 1 |
| gb KG9B.106G11F.051129T7 KG9B Nicotiana tabacum cDNA clone KG9B.106G11, n             | 103.04   | 1 |
| tc Rep: Glucose-6-phosphate 1-dehydrogenase, chloroplast precursor - Nicotiana ta     | 2848.87  | 1 |
| Unknown                                                                               | 226.54   | 1 |
| Unknown                                                                               | 48.12    | 1 |
| tc Rep: Chromosome undetermined scaffold_147, whole genome shotgun sequenc            | 155.22   | 1 |
| gb EST_CSP014xa03f1.ab1 EST_CSP Nicotiana tabacum cDNA, mRNA sequence [EH             | 30.84    | 1 |
| tc Rep: Chromosome chr3 scaffold_8, whole genome shotgun sequence - Vitis vinif       | 1519.76  | 1 |
| tc Rep: Chromosome chr18 scaffold_1, whole genome shotgun sequence - Vitis vin        | 395.94   | 1 |
| Unknown                                                                               | 477.35   | 1 |
| gb Nicotiana tabacum NtVPE-3 mRNA for vacuolar processing enzyme-3 complete           | 1073.03  | 1 |
| Unknown                                                                               | 18.4     | 1 |
| Unknown                                                                               | 376.99   | 1 |
| tc Rep: Chromosome chr9 scaffold_49, whole genome shotgun sequence - Vitis vin        | 186.62   | 1 |
| Unknown                                                                               | 41.48    | 1 |
| gb KT7C.104L09F.051219T7 KT7 Nicotiana tabacum cDNA clone KT7C.104L09, mRN            | 1073.01  | 1 |
| tc Rep: Chromosome chr11 scaffold_13, whole genome shotgun sequence - Vitis vi        | 331.79   | 1 |
| gb AGN_ELP009xo12f1.ab1 AGN_ELP Nicotiana tabacum cDNA 5', mRNA sequence              | 101.88   | 1 |
| tc Rep: Fructokinase-2 - Solanum lycopersicum (Tomato) (Lycopersicon esculenturr      | 12623.95 | 1 |
| gb KG9B.102D19F.051126T7 KG9B Nicotiana tabacum cDNA clone KG9B.102D19, n             | 43.42    | 1 |
| tc Rep: NADPH-cytochrome P450 oxidoreductase - Nicotiana tabacum (Common tc           | 37.82    | 1 |
| Unknown                                                                               | 84.31    | 1 |
| gb TT-08_P05 Samsun trichome library Nicotiana tabacum cDNA, mRNA sequence            | 40.84    | 1 |
| tc Rep: Transcription initiation factor - Plantago major (Common plantain), partial ( | 403.76   | 1 |
| gb TOBESTR094D04 TOBEST cDNA library 1 Nicotiana tabacum cDNA 5', mRNA seq            | 105.73   | 1 |
| gb KG9B.106K11F.051129T7 KG9B Nicotiana tabacum cDNA clone KG9B.106K11, m             | 24.49    | 1 |
| Unknown                                                                               | 71.12    | 1 |

|                                                                                              |         |   |
|----------------------------------------------------------------------------------------------|---------|---|
| gb KF8C.110O24F.051216T7 KF8 Nicotiana tabacum cDNA clone KF8C.110O24, mRNA                  | 194.46  | 1 |
| gb KP1B.113O10F.060117T7 KP1B Nicotiana tabacum cDNA clone KP1B.113O10, mRNA                 | 95.38   | 1 |
| tc Rep: Chromosome chr10 scaffold_81, whole genome shotgun sequence - Vitis vinifera         | 45.96   | 1 |
| Unknown                                                                                      | 30.98   | 1 |
| gb KF8C.110C21F.051216T7 KF8 Nicotiana tabacum cDNA clone KF8C.110C21, mRNA                  | 24.62   | 1 |
| gb KG9B.102P18F.051126T7 KG9B Nicotiana tabacum cDNA clone KG9B.102P18, mRNA                 | 163.36  | 1 |
| Unknown                                                                                      | 183.57  | 1 |
| tc Rep: Chromosome chr15 scaffold_37, whole genome shotgun sequence - Vitis vinifera         | 68.38   | 1 |
| tc Rep: Phosphoglucomutase, cytoplasmic - Solanum tuberosum (Potato), partial (70%)          | 5510.12 | 1 |
| Unknown                                                                                      | 20.46   | 1 |
| gb KP1B.101J07F.050722T7 KP1B Nicotiana tabacum cDNA clone KP1B.101J07, mRNA                 | 1358.72 | 1 |
| tc Rep: Dihydrolipoyl dehydrogenase - Capsicum annuum (Bell pepper), partial (39%)           | 1164.43 | 1 |
| Unknown                                                                                      | 385.17  | 1 |
| gb TT-50_B23 Samsun trichome library Nicotiana tabacum cDNA, mRNA sequence                   | 264.45  | 1 |
| gb FS383363 normalized full-length tobacco cDNA library Nicotiana tabacum cDNA               | 32.54   | 1 |
| gb KP1B.107G18F.050726T7 KP1B Nicotiana tabacum cDNA clone KP1B.107G18, mRNA                 | 22      | 1 |
| tc Rep: Glyoxalase/bleomycin resistance protein/dioxygenase - Sphingomonas wittichii         | 41.31   | 1 |
| Unknown                                                                                      | 77.09   | 1 |
| tc Rep: 60S acidic ribosomal protein P0 - Solanum tuberosum (Potato), partial (83%)          | 252.4   | 1 |
| Unknown                                                                                      | 43.67   | 1 |
| tc Rep: Glycosyl hydrolase family-like protein - Salvia miltiorrhiza (Chinese sage), partial | 25.95   | 1 |
| gb AGN_RNC116xj11f1.ab1 AGN_RNC Nicotiana tabacum cDNA 5', mRNA sequence                     | 49.12   | 1 |
| Unknown                                                                                      | 122.88  | 1 |
| Unknown                                                                                      | 237.53  | 1 |
| Unknown                                                                                      | 663.85  | 1 |
| gb AGN_PNL210af1_d2.trimmed.seq AGN_PNL Nicotiana tabacum cDNA 5', mRNA                      | 1130.55 | 1 |
| tc Rep: Chromosome undetermined scaffold_133, whole genome shotgun sequence                  | 116.02  | 1 |
| Unknown                                                                                      | 377.8   | 1 |
| Unknown                                                                                      | 121.75  | 1 |
| Unknown                                                                                      | 196.48  | 1 |
| gb TT-07_N20 Samsun trichome library Nicotiana tabacum cDNA, mRNA sequence                   | 820.06  | 1 |
| Unknown                                                                                      | 25.01   | 1 |
| tc Rep: Chromosome chr2 scaffold_11, whole genome shotgun sequence - Vitis vinifera          | 138.56  | 1 |
| gb BL12.001I10F.060117T7 BL12 Nicotiana tabacum cDNA clone BL12.001I10, mRNA                 | 34.98   | 1 |



|                                                                                    |         |   |
|------------------------------------------------------------------------------------|---------|---|
| gb AGN_PNL212ar1_b4.trimmed.seq AGN_PNL Nicotiana tabacum cDNA 3', mRNA            | 135.99  | 1 |
| gb KG9B.101J02F.060120T7 KG9B Nicotiana tabacum cDNA clone KG9B.101J02, m          | 22.56   | 1 |
| Unknown                                                                            | 103.48  | 1 |
| gb TOBESTR015D12 TOBEST cDNA library 1 Nicotiana tabacum cDNA 5', mRNA seq         | 1496.42 | 1 |
| Unknown                                                                            | 45.01   | 1 |
| gb FS405773 normalized full-length tobacco cDNA library Nicotiana tabacum cDNA     | 3288.07 | 1 |
| tc Rep: Plastid enolase - Helianthus annuus (Common sunflower), partial (41%) [TC  | 273.04  | 1 |
| Unknown                                                                            | 72.57   | 1 |
| gb BP533488 MAT005 Nicotiana tabacum cDNA clone BY30178, mRNA sequence [E          | 346.38  | 1 |
| Unknown                                                                            | 9396.39 | 1 |
| Unknown                                                                            | 49.71   | 1 |
| gb CHO_SL018xn22f1.ab1 CHO_SL Nicotiana tabacum cDNA, mRNA sequence [EH6           | 3266.59 | 1 |
| gb KR2B.002D13F.051019T7 KR2B Nicotiana tabacum cDNA clone KR2B.002D13, m          | 2945.69 | 1 |
| tc Rep: Profilin - Solanum lycopersicum (Tomato) (Lycopersicon esculentum), comp   | 689.55  | 1 |
| tc Rep: Chromosome chr14 scaffold_27, whole genome shotgun sequence - Vitis vi     | 3332.86 | 1 |
| tc Rep: Ribosomal protein S14-like - Solanum tuberosum (Potato), partial (96%) [TC | 120.27  | 1 |
| tc Rep: Citrate synthase, glyoxysomal precursor - Cucurbita maxima (Pumpkin) (Wii  | 265.36  | 1 |
| tc Rep: Chromosome chr14 scaffold_21, whole genome shotgun sequence - Vitis vi     | 45.44   | 1 |
| tc Rep: Histone H2A - Vitis vinifera (Grape), partial (88%) [TC71367]              | 24.42   | 1 |
| gb BP530801 MAT005 Nicotiana tabacum cDNA clone BY23062, mRNA sequence [E          | 103.38  | 1 |
| Unknown                                                                            | 50.7    | 1 |
| gb Nicotiana tabacum cDNA-AFLP-fragment BSTT4-43-390, cultivar Bright Yellow 2     | 22.54   | 1 |
| Unknown                                                                            | 50.28   | 1 |
| tc Rep: AT3g06820/F3E22_4 - Arabidopsis thaliana (Mouse-ear cress), partial (46%)  | 72.24   | 1 |
| tc Rep: Chromosome chr18 scaffold_1, whole genome shotgun sequence - Vitis vin     | 1421.76 | 1 |
| gb Nicotiana tabacum sucrose-6-phosphate phosphatase (SPP2) mRNA, complete c       | 261.52  | 1 |
| tc Rep: Chromosome chr9 scaffold_7, whole genome shotgun sequence - Vitis vinif    | 10493.5 | 1 |
| gb Nicotiana tabacum Avr9 [AY220479]                                               | 186.85  | 1 |
| Unknown                                                                            | 298.84  | 1 |
| gb N.tabacum mRNA pNLA-35 [X79794]                                                 | 176.49  | 1 |
| gb KG9B.105O13F.051128T7 KG9B Nicotiana tabacum cDNA clone KG9B.105O13, r          | 179.83  | 1 |
| gb KP1B.037P02F.050628T7 KP1B Nicotiana tabacum cDNA clone KP1B.037P02, m          | 43.33   | 1 |
| tc Rep: Chromosome chr4 scaffold_39, whole genome shotgun sequence - Vitis vin     | 242.01  | 1 |
| Unknown                                                                            | 28.38   | 1 |

|                                                                                         |         |   |
|-----------------------------------------------------------------------------------------|---------|---|
| gb BP531361 MAT005 Nicotiana tabacum cDNA clone BY24256, mRNA sequence [E               | 46.21   | 1 |
| Unknown                                                                                 | 316.47  | 1 |
| Unknown                                                                                 | 508.23  | 1 |
| Unknown                                                                                 | 19.73   | 1 |
| Unknown                                                                                 | 85.94   | 1 |
| gb KP1B.109A05F.050727T7 KP1B Nicotiana tabacum cDNA clone KP1B.109A05, m               | 221.48  | 1 |
| gb KR2B.112B19F.051230T7 KR2B Nicotiana tabacum cDNA clone KR2B.112B19, m               | 414.51  | 1 |
| gb KR3B.106M07F.051109T7 KR3B Nicotiana tabacum cDNA clone KR3B.106M07, r               | 151.28  | 1 |
| tc Rep: AT3g47831/T23J7 - Arabidopsis thaliana (Mouse-ear cress), partial (89%) [T      | 225.24  | 1 |
| tc Rep: Chromosome chr18 scaffold_137, whole genome shotgun sequence - Vitis v          | 267.14  | 1 |
| gb KR3B.103O01F.051108T7 KR3B Nicotiana tabacum cDNA clone KR3B.103O01, r               | 1483.22 | 1 |
| gb TT-28_H11 tobacco leaf library Nicotiana tabacum cDNA, mRNA sequence [FG6:           | 44.53   | 1 |
| Unknown                                                                                 | 248.32  | 1 |
| gb AGN_RNC013xn01f1.ab1 AGN_RNC Nicotiana tabacum cDNA 5', mRNA sequenc                 | 81.16   | 1 |
| tc Rep: Chromosome undetermined scaffold_143, whole genome shotgun sequenc              | 382.62  | 1 |
| gb Nicotiana tabacum VTC2-like protein mRNA, complete cds [EU700061]                    | 9032.92 | 1 |
| gb KF8C.101E17F.051214T7 KF8 Nicotiana tabacum cDNA clone KF8C.101E17, mRN              | 1529.51 | 1 |
| gb AM811421 seedling library, SL Nicotiana tabacum cDNA clone nt002215062, mF           | 19.9    | 1 |
| Unknown                                                                                 | 21.89   | 1 |
| gb TOBESTR046E09 TOBEST cDNA library 1 Nicotiana tabacum cDNA 5', mRNA seq              | 78.46   | 1 |
| gb KN6B.105P08F.060104T7 KN6B Nicotiana tabacum cDNA clone KN6B.105P08, r               | 1112.82 | 1 |
| tc Rep: Protein kinase-like protein - Vitis aestivalis (Grape), partial (51%) [TC57156] | 712.46  | 1 |
| gb AGN_PNL222cr1_c3.trimmed.seq AGN_PNL Nicotiana tabacum cDNA 3', mRNA                 | 235.35  | 1 |
| gb Nicotiana tabacum partial mRNA for chloroplast FtsZ-like protein (ftsZ gene), clc    | 383.07  | 1 |
| tc Rep: Chromosome chr13 scaffold_17, whole genome shotgun sequence - Vitis vi          | 1732.37 | 1 |
| Unknown                                                                                 | 18.44   | 1 |
| tc Rep: Chromosome chr5 scaffold_67, whole genome shotgun sequence - Vitis vin          | 505.08  | 1 |
| tc Rep: Chromosome chr4 scaffold_6, whole genome shotgun sequence - Vitis vinif         | 1869.84 | 1 |
| gb TT-13_A18 tobacco leaf library Nicotiana tabacum cDNA, mRNA sequence [FG6:           | 95.66   | 1 |
| gb KT7C.106O18F.051219T7 KT7 Nicotiana tabacum cDNA clone KT7C.106O18, mR               | 49.5    | 1 |
| gb KG9B.101O13F.060120T7 KG9B Nicotiana tabacum cDNA clone KG9B.101O13, r               | 35.69   | 1 |
| tc Rep: Os03g0742400 protein - Oryza sativa subsp. japonica (Rice), partial (71%) [T    | 2848.06 | 1 |
| tc Rep: SUI1 protein - Coffea arabica (Coffee), complete [TC71048]                      | 55.9    | 1 |
| tc Rep: 40S ribosomal protein S15-like - Solanum tuberosum (Potato), complete [TC       | 311.4   | 1 |

|                                                                                              |          |   |
|----------------------------------------------------------------------------------------------|----------|---|
| gb TT-11_G22 K326 trichome library <i>Nicotiana tabacum</i> cDNA, mRNA sequence [FC          | 268.86   | 1 |
| tc Rep: Growth regulator like protein - <i>Arabidopsis thaliana</i> (Mouse-ear cress), part  | 114.22   | 1 |
| tc Rep: Chromosome chr3 scaffold_8, whole genome shotgun sequence - <i>Vitis vinifera</i>    | 20.94    | 1 |
| Unknown                                                                                      | 824.73   | 1 |
| tc Rep: Chromosome chr16 scaffold_10, whole genome shotgun sequence - <i>Vitis vinifera</i>  | 280.51   | 1 |
| tc Rep: ATP-dependent Clp protease proteolytic subunit - <i>Nicotiana sylvestris</i> (Wood   | 1835.53  | 1 |
| tc Rep: Hydroxyproline-rich glycoprotein - <i>Chlamydomonas reinhardtii</i> , partial (6%)   | 2599.53  | 1 |
| Unknown                                                                                      | 4696.44  | 1 |
| Unknown                                                                                      | 1993.96  | 1 |
| gb AGN_RNC127xh11f1.ab1 AGN_RNC <i>Nicotiana tabacum</i> cDNA 5', mRNA sequence              | 34.9     | 1 |
| Unknown                                                                                      | 266.27   | 1 |
| Unknown                                                                                      | 30.86    | 1 |
| gb  <i>Nicotiana tabacum</i> cDNA-AFLP-fragment BSTT1-21-250, cultivar Bright Yellow 2       | 148.46   | 1 |
| gb KN6B.104D21F.060103T7 KN6B <i>Nicotiana tabacum</i> cDNA clone KN6B.104D21, n             | 23.42    | 1 |
| tc Rep: Chromosome chr10 scaffold_50, whole genome shotgun sequence - <i>Vitis vinifera</i>  | 25.44    | 1 |
| tc Rep: Chromosome chr16 scaffold_86, whole genome shotgun sequence - <i>Vitis vinifera</i>  | 121.93   | 1 |
| gb KR2B.115D09F.051230T7 KR2B <i>Nicotiana tabacum</i> cDNA clone KR2B.115D09, m             | 92.41    | 1 |
| gb  <i>Nicotiana tabacum</i> npp1 mRNA for protein phosphatase type 1 [Z93768]               | 2002.47  | 1 |
| tc Rep: Cytochrome b-c1 complex subunit 7 - <i>Solanum tuberosum</i> (Potato), complete      | 2875.36  | 1 |
| gb AM820707 COL, cold overnight library <i>Nicotiana tabacum</i> cDNA clone nt006042         | 126.62   | 1 |
| Unknown                                                                                      | 89.24    | 1 |
| gb AGN_PNL231df1_g2.trimmed.seq AGN_PNL <i>Nicotiana tabacum</i> cDNA 5', mRNA               | 1565.58  | 1 |
| tc Rep: Chromosome chr9 scaffold_65, whole genome shotgun sequence - <i>Vitis vinifera</i>   | 55.07    | 1 |
| gb CHO_SL012xd11f1.ab1 CHO_SL <i>Nicotiana tabacum</i> cDNA, mRNA sequence [EH6              | 4251.44  | 1 |
| gb KG9B.107L23F.060120T7 KG9B <i>Nicotiana tabacum</i> cDNA clone KG9B.107L23, m             | 943.65   | 1 |
| gb 29A04 Transformed tobacco Lambda Zap II library <i>Nicotiana tabacum</i> cDNA 5', r       | 283.43   | 1 |
| tc Rep: Chromosome chr6 scaffold_25, whole genome shotgun sequence - <i>Vitis vinifera</i>   | 10892.55 | 1 |
| Unknown                                                                                      | 6299.97  | 1 |
| gb KR3B.107C16F.051110T7 KR3B <i>Nicotiana tabacum</i> cDNA clone KR3B.107C16, m             | 269.34   | 1 |
| tc Rep: Chromosome chr19 scaffold_35, whole genome shotgun sequence - <i>Vitis vinifera</i>  | 9131.95  | 1 |
| tc Rep: Probable ubiquitin-fold modifier 1 precursor - <i>Oryza sativa</i> subsp. japonica ( | 2730.12  | 1 |
| Unknown                                                                                      | 175.61   | 1 |
| gb TT-26_M08 K326 late senescent leaf library <i>Nicotiana tabacum</i> cDNA, mRNA sequence   | 987.61   | 1 |
| tc Rep: Chromosome chr3 scaffold_8, whole genome shotgun sequence - <i>Vitis vinifera</i>    | 59.44    | 1 |

|                                                                                    |         |   |
|------------------------------------------------------------------------------------|---------|---|
| gb KR2B.112G14F.051230T7 KR2B Nicotiana tabacum cDNA clone KR2B.112G14, m          | 517.21  | 1 |
| Unknown                                                                            | 914.34  | 1 |
| gb AGN_ELP024xf11f1.ab1 AGN_ELP Nicotiana tabacum cDNA 5', mRNA sequence           | 68.57   | 1 |
| gb KT7C.104A20F.051219T7 KT7 Nicotiana tabacum cDNA clone KT7C.104A20, mR          | 39.06   | 1 |
| gb KG9B.005N08F.050721T7 KG9B Nicotiana tabacum cDNA clone KG9B.005N08, n          | 467.45  | 1 |
| tc Rep: Calcium/calmodulin-dependent protein kinase CaMK3 - Nicotiana tabacum      | 28.5    | 1 |
| gb KF8C.103J07F.051214T7 KF8 Nicotiana tabacum cDNA clone KF8C.103J07, mRN         | 64.46   | 1 |
| gb KG9B.001N04F.050628T7 KG9B Nicotiana tabacum cDNA clone KG9B.001N04, n          | 26.07   | 1 |
| gb KG9B.103D09F.051128T7 KG9B Nicotiana tabacum cDNA clone KG9B.103D09, n          | 60.51   | 1 |
| Unknown                                                                            | 531.98  | 1 |
| Unknown                                                                            | 101.19  | 1 |
| gb AGN_RNC007xl06f1.ab1 AGN_RNC Nicotiana tabacum cDNA 5', mRNA sequenc            | 43.15   | 1 |
| gb KF8C.102F19F.051214T7 KF8 Nicotiana tabacum cDNA clone KF8C.102F19, mRN         | 188.46  | 1 |
| gb KP1B.104C19F.050725T7 KP1B Nicotiana tabacum cDNA clone KP1B.104C19, mI         | 17334.7 | 1 |
| gb KT7B.100P11F.051010T7 KT7 Nicotiana tabacum cDNA clone KT7B.100P11, mR          | 85.57   | 1 |
| Unknown                                                                            | 112.77  | 1 |
| Unknown                                                                            | 1140.72 | 1 |
| Unknown                                                                            | 17783.5 | 1 |
| tc Rep: Chromosome chr5 scaffold_2, whole genome shotgun sequence - Vitis vinif    | 2128.55 | 1 |
| gb N.tabacum mRNA for phosphoglycerate kinase (chloroplast isoenzyme) [Z48977      | 28.94   | 1 |
| gb KF8C.103C02F.051214T7 KF8 Nicotiana tabacum cDNA clone KF8C.103C02, mRN         | 1165.75 | 1 |
| Unknown                                                                            | 33.55   | 1 |
| gb KT7C.106H18F.051219T7 KT7 Nicotiana tabacum cDNA clone KT7C.106H18, mR          | 169.41  | 1 |
| tc Rep: Xylose isomerase - Vitis vinifera (Grape), partial (50%) [TC40722]         | 269.86  | 1 |
| Unknown                                                                            | 382.68  | 1 |
| tc Rep: NmrA-like family protein - Solanum demissum (Wild potato), partial (21%) [ | 294.29  | 1 |
| tc Rep: UDP-glucose dehydrogenase - Cinnamomum osmophloeum, partial (93%) [        | 3295.87 | 1 |
| gb KR3B.112H24F.060119T7 KR3B Nicotiana tabacum cDNA clone KR3B.112H24, m          | 1024    | 1 |
| Unknown                                                                            | 71.26   | 1 |
| tc Rep: Chromosome chr11 scaffold_13, whole genome shotgun sequence - Vitis vi     | 22.77   | 1 |
| tc Rep: NADH dehydrogenase subunit 2 - Apalacris nigrogeniculata, partial (7%) [TC | 226.66  | 1 |
| Unknown                                                                            | 851.5   | 1 |
| Unknown                                                                            | 28.97   | 1 |
| gb AGN_RPC016xe03f1.ab1 AGN_RPC Nicotiana tabacum cDNA 5', mRNA sequenc            | 425.61  | 1 |

|                                                                                      |         |   |
|--------------------------------------------------------------------------------------|---------|---|
| gb KN6B.105J11F.060104T7 KN6B Nicotiana tabacum cDNA clone KN6B.105J11, mF           | 370.23  | 1 |
| tc Rep: 26S proteasome subunit 7-like protein - Lactuca sativa (Garden lettuce), cor | 206.3   | 1 |
| tc Rep: Gibberellic acid receptor - Gossypium hirsutum (Upland cotton) (Gossypium    | 28.57   | 1 |
| Unknown                                                                              | 45.54   | 1 |
| gb N.tabacum mRNA for L-Glutamate:tRNA-Glu ligase [X83524]                           | 190.41  | 1 |
| Unknown                                                                              | 392.67  | 1 |
| gb Nicotiana tabacum partial sat1 gene for serine acetyltransferase 1, genomic RN/   | 21.88   | 1 |
| gb Nicotiana tabacum trehalose-phosphate phosphatase mRNA, complete cds [AY5         | 2706.36 | 1 |
| Unknown                                                                              | 81.59   | 1 |
| tc Rep: Chromosome undetermined scaffold_1205, whole genome shotgun sequen           | 544.15  | 1 |
| tc Rep: Chromosome chr5 scaffold_72, whole genome shotgun sequence - Vitis vin       | 177.15  | 1 |
| Unknown                                                                              | 68.64   | 1 |
| tc Rep: Asparagine synthetase - Striga hermonthica (Purple witchweed), partial (34   | 995.63  | 1 |
| gb Nicotiana tabacum Avr9 [AF211536]                                                 | 459.98  | 1 |
| Unknown                                                                              | 278.84  | 1 |
| tc Rep: Chromosome chr8 scaffold_23, whole genome shotgun sequence - Vitis vin       | 151.15  | 1 |
| tc Rep: Predicted protein - Physcomitrella patens subsp. patens, partial (3%) [TC474 | 101.69  | 1 |
| tc Rep: Chromosome chr2 scaffold_11, whole genome shotgun sequence - Vitis vin       | 16600.7 | 1 |
| gb TT-06_N13 K326 late senescent leaf library Nicotiana tabacum cDNA, mRNA seq       | 177.53  | 1 |
| gb KR3B.110P06F.051111T7 KR3B Nicotiana tabacum cDNA clone KR3B.110P06, mF           | 179.66  | 1 |
| tc Rep: Chromosome chr19 scaffold_4, whole genome shotgun sequence - Vitis vin       | 3934.77 | 1 |
| gb KG9B.106H12F.051129T7 KG9B Nicotiana tabacum cDNA clone KG9B.106H12, n            | 304.64  | 1 |
| tc Rep: Chromosome chr16 scaffold_10, whole genome shotgun sequence - Vitis vi       | 46.57   | 1 |
| gb BP129674 MAT001 Nicotiana tabacum cDNA clone BY1554, mRNA sequence [BF            | 451.02  | 1 |
| tc Rep: NTMTP1A - Nicotiana tabacum (Common tobacco), complete [TC40171]             | 763     | 1 |
| Unknown                                                                              | 20.95   | 1 |
| gb KL5B.109A12F.060215T7 KL5B Nicotiana tabacum cDNA clone KL5B.109A12, mF           | 2421.64 | 1 |
| gb KL4B.109C03F.051105T7 KL4B Nicotiana tabacum cDNA clone KL4B.109C03, mR           | 408.46  | 1 |
| gb TT-10_O13 K326 late senescent leaf library Nicotiana tabacum cDNA, mRNA seq       | 68.95   | 1 |
| tc Rep: Chromosome chr19 scaffold_4, whole genome shotgun sequence - Vitis vin       | 645.47  | 1 |
| gb KL4B.105L08F.051104T7 KL4B Nicotiana tabacum cDNA clone KL4B.105L08, mRI          | 61.75   | 1 |
| gb ntsm8 embryogenic microspores Nicotiana tabacum cDNA, mRNA sequence [EB           | 114.11  | 1 |
| gb AM793040 seedling library, SL Nicotiana tabacum cDNA clone nt002063082, mF        | 31.15   | 1 |
| gb KR2B.104A23F.051227T7 KR2B Nicotiana tabacum cDNA clone KR2B.104A23, m            | 71.92   | 1 |

|                                                                                       |          |   |
|---------------------------------------------------------------------------------------|----------|---|
| gb KT7C.102E05F.051216T7 KT7 Nicotiana tabacum cDNA clone KT7C.102E05, mRNA           | 192.42   | 1 |
| gb CHO_SL002xh18f1.ab1 CHO_SL Nicotiana tabacum cDNA, mRNA sequence [EH6              | 34720.65 | 1 |
| Unknown                                                                               | 1924.72  | 1 |
| Unknown                                                                               | 500.48   | 1 |
| gb KL4B.101N08F.051103T7 KL4B Nicotiana tabacum cDNA clone KL4B.101N08, mRNA          | 354.73   | 1 |
| gb TT-21_K22 K326 late senescent leaf library Nicotiana tabacum cDNA, mRNA seq        | 27.16    | 1 |
| Unknown                                                                               | 194.89   | 1 |
| gb Nicotiana tabacum mRNA cytosolic glucose-6-phosphate dehydrogenase TCG6 [          | 93.2     | 1 |
| gb KR3B.109F16F.051111T7 KR3B Nicotiana tabacum cDNA clone KR3B.109F16, mRNA          | 26.06    | 1 |
| gb AGN_RNC003xf15f1.ab1 AGN_RNC Nicotiana tabacum cDNA 5', mRNA sequence              | 58.13    | 1 |
| tc Rep: Tonoplast intrinsic protein bobTIP26-1 - Brassica oleracea var. botrytis (Cau | 261.37   | 1 |
| gb AM829948 seedling library, SL Nicotiana tabacum cDNA clone nt002139094, mRNA       | 197.8    | 1 |
| Unknown                                                                               | 52.63    | 1 |
| gb 18.2F11 Transformed tobacco Lambda Zap II library Nicotiana tabacum cDNA 5',       | 1001.41  | 1 |
| gb KG9B.103H16F.051128T7 KG9B Nicotiana tabacum cDNA clone KG9B.103H16, mRNA          | 2129.36  | 1 |
| Unknown                                                                               | 127.51   | 1 |
| tc Rep: Chromosome chr17 scaffold_12, whole genome shotgun sequence - Vitis vi        | 98.88    | 1 |
| gb BP528938 MAT001 Nicotiana tabacum cDNA clone BY13812, mRNA sequence [E             | 136.55   | 1 |
| gb AM793251 seedling library, SL Nicotiana tabacum cDNA clone nt002213012, mRNA       | 142.68   | 1 |
| tc Rep: Chromosome chr16 scaffold_10, whole genome shotgun sequence - Vitis vi        | 472.98   | 1 |
| gb KN6B.104G23F.060103T7 KN6B Nicotiana tabacum cDNA clone KN6B.104G23, mRNA          | 17243.75 | 1 |
| Unknown                                                                               | 26.63    | 1 |
| tc Rep: Chromosome undetermined scaffold_437, whole genome shotgun sequenc            | 31.38    | 1 |
| Unknown                                                                               | 45.73    | 1 |
| Unknown                                                                               | 207.11   | 1 |
| gb BP129537 MAT001 Nicotiana tabacum cDNA clone BY1408, mRNA sequence [BF             | 28.45    | 1 |
| tc AAD10662.1 - Arabidopsis thaliana (Mouse-ear cress), partial (58%) [TC67894]       | 63.24    | 1 |
| tc Rep: NADH-ubiquinone oxidoreductase 75 kDa subunit, mitochondrial precursor        | 132.7    | 1 |
| tc Rep: Chromosome chr17 scaffold_101, whole genome shotgun sequence - Vitis v        | 1526.33  | 1 |
| tc Rep: Protein phosphatase 2C - Fagus sylvatica (Beechnut), partial (54%) [TC4462:   | 1169.63  | 1 |
| Unknown                                                                               | 148.15   | 1 |
| gb KG9B.107N18F.060120T7 KG9B Nicotiana tabacum cDNA clone KG9B.107N18, mRNA          | 136.83   | 1 |
| gb KP1B.109O15F.050727T7 KP1B Nicotiana tabacum cDNA clone KP1B.109O15, mRNA          | 633.96   | 1 |
| Unknown                                                                               | 1505.44  | 1 |

|                                                                                     |         |   |
|-------------------------------------------------------------------------------------|---------|---|
| tc Rep: Chromosome chr14 scaffold_9, whole genome shotgun sequence - Vitis vin      | 904.73  | 1 |
| Unknown                                                                             | 24.67   | 1 |
| tc Rep: Chromosome chr2 scaffold_132, whole genome shotgun sequence - Vitis vi      | 4960.6  | 1 |
| tc Rep: Pyruvate kinase - Medicago truncatula (Barrel medic), partial (48%) [TC451: | 909.38  | 1 |
| tc Rep: NADH-ubiquinone oxidoreductase chain 1 - Arion anthracius, partial (10%) [  | 42.67   | 1 |
| tc Rep: Syntaxin-52 - Arabidopsis thaliana (Mouse-ear cress), complete [TC76446]    | 376.34  | 1 |
| gb KF8C.103O14F.051214T7 KF8 Nicotiana tabacum cDNA clone KF8C.103O14, mRl          | 99.17   | 1 |
| gb KG9B.107G19F.060120T7 KG9B Nicotiana tabacum cDNA clone KG9B.107G19, n           | 1919.07 | 1 |
| tc Rep: Histone H4 [Contains: Osteogenic growth peptide (OGP)]. - Rattus norvegici  | 812.74  | 1 |
| tc Rep: Chromosome chr13 scaffold_48, whole genome shotgun sequence - Vitis vi      | 67.09   | 1 |
| Unknown                                                                             | 89.29   | 1 |
| tc Rep: Uncharacterized protein At5g64130.3 - Arabidopsis thaliana (Mouse-ear cre   | 1147.53 | 1 |
| Unknown                                                                             | 191.92  | 1 |
| Unknown                                                                             | 23      | 1 |
| gb KP1B.109G14F.050727T7 KP1B Nicotiana tabacum cDNA clone KP1B.109G14, m           | 85.51   | 1 |
| gb BL12.104B18F.060309T7 BL12 Nicotiana tabacum cDNA clone BL12.104B18, mR          | 126.4   | 1 |
| tc Rep: MADF; Homeodomain-like - Medicago truncatula (Barrel medic), partial (20    | 575.71  | 1 |
| Unknown                                                                             | 64.66   | 1 |
| Unknown                                                                             | 47.47   | 1 |
| tc Rep: Peptide methionine sulfoxide reductase (Protein- methionine-S-oxide redu    | 120.05  | 1 |
| gb KG9B.104N03F.060120T7 KG9B Nicotiana tabacum cDNA clone KG9B.104N03, n           | 53.04   | 1 |
| gb KP1B.103B13F.050725T7 KP1B Nicotiana tabacum cDNA clone KP1B.103B13, ml          | 40.9    | 1 |
| tc Rep: Chromosome chr4 scaffold_32, whole genome shotgun sequence - Vitis vin      | 413.52  | 1 |
| tc Rep: Tic20-like protein - Solanum tuberosum (Potato), partial (77%) [TC49054]    | 568.5   | 1 |
| tc Rep: Homolog of Homo sapiens "Megakaryocyte stimulating factor - Takifugu rul    | 58.48   | 1 |
| Unknown                                                                             | 33.13   | 1 |
| Unknown                                                                             | 226.92  | 1 |
| Unknown                                                                             | 26.81   | 1 |
| Unknown                                                                             | 1763.65 | 1 |
| Unknown                                                                             | 31.04   | 1 |
| Unknown                                                                             | 42.86   | 1 |
| tc Rep: Chromosome chr4 scaffold_32, whole genome shotgun sequence - Vitis vin      | 26.75   | 1 |
| gb N.tabacum mRNA for subunit of NADH:ubiquinone oxidoreductase complex I [Yl       | 218.4   | 1 |
| tc Rep: Calcium-dependent protein kinases 5 - Solanum tuberosum (Potato), partia    | 1037.94 | 1 |

|                                                                                       |         |   |
|---------------------------------------------------------------------------------------|---------|---|
| gb Nicotiana tabacum NtPITSLRE alpha mRNA for homolog of mammalian PITSLRE            | 52.44   | 1 |
| gb BP131286 MAT001 Nicotiana tabacum cDNA clone BY3322, mRNA sequence [BF             | 3120.26 | 1 |
| gb Nicotiana tabacum cyclin B-like protein mRNA, complete cds [AY776171]              | 71.53   | 1 |
| Unknown                                                                               | 219.1   | 1 |
| gb AGN_RNC211xh01f1.ab1 AGN_RNC Nicotiana tabacum cDNA 5', mRNA sequenc               | 4060.51 | 1 |
| Unknown                                                                               | 870.08  | 1 |
| tc Rep: Chromosome chr9 scaffold_7, whole genome shotgun sequence - Vitis vinif       | 260.46  | 1 |
| Unknown                                                                               | 107.36  | 1 |
| gb KG9B.103C12F.051128T7 KG9B Nicotiana tabacum cDNA clone KG9B.103C12, r             | 162.38  | 1 |
| tc Rep: Chromosome chr10 scaffold_43, whole genome shotgun sequence - Vitis vi        | 268.73  | 1 |
| tc Rep: Chromosome chr15 scaffold_19, whole genome shotgun sequence - Vitis vi        | 189.56  | 1 |
| gb TT-05_A08 tobacco leaf library Nicotiana tabacum cDNA, mRNA sequence [FG6:         | 113.42  | 1 |
| gb KL4B.103G09F.051103T7 KL4B Nicotiana tabacum cDNA clone KL4B.103G09, mF            | 597.38  | 1 |
| tc Rep: RNA-binding protein-like - Oryza sativa subsp. japonica (Rice), partial (10%) | 44.01   | 1 |
| gb ntsm10 embryogenic microspores Nicotiana tabacum cDNA, mRNA sequence [E            | 110.56  | 1 |
| tc Rep: Chromosome chr18 scaffold_1, whole genome shotgun sequence - Vitis vin        | 513.36  | 1 |
| gb AM800056 seedling library, SL Nicotiana tabacum cDNA clone nt002096042, mF         | 76.25   | 1 |
| Unknown                                                                               | 436.34  | 1 |
| tc Rep: Zinc finger protein - Zea mays (Maize), partial (68%) [TC43008]               | 3174.3  | 1 |
| tc Rep: Protein kinase Ck2 regulatory subunit 2 - Nicotiana tabacum (Common toba      | 197.8   | 1 |
| gb KR3B.111I05F.060119T7 KR3B Nicotiana tabacum cDNA clone KR3B.111I05, mRl           | 27.58   | 1 |
| gb TT-10_H14 Burley21 trichome library Nicotiana tabacum cDNA, mRNA sequence          | 46.48   | 1 |
| Unknown                                                                               | 44.17   | 1 |
| gb KL4B.106N10F.051125T7 KL4B Nicotiana tabacum cDNA clone KL4B.106N10, mF            | 2900.3  | 1 |
| gb KF8C.106L14F.051215T7 KF8 Nicotiana tabacum cDNA clone KF8C.106L14, mRN            | 490.26  | 1 |
| tc Rep: Chromosome chr7 scaffold_20, whole genome shotgun sequence - Vitis vin        | 670.09  | 1 |
| gb KP1B.001E04F.050628T7 KP1B Nicotiana tabacum cDNA clone KP1B.001E04, mF            | 754.02  | 1 |
| tc Rep: Ribosomal protein S8 - Vitis vinifera (Grape), partial (96%) [TC40909]        | 105.6   | 1 |
| Unknown                                                                               | 103.37  | 1 |
| tc Rep: Chromosome chr4 scaffold_83, whole genome shotgun sequence - Vitis vin        | 222.52  | 1 |
| tc Rep: DWARF1/DIMINUTO - Solanum lycopersicum (Tomato) (Lycopersicon esculi          | 101.57  | 1 |
| tc Rep: Chromosome undetermined scaffold_226, whole genome shotgun sequenc            | 591.18  | 1 |
| gb EST_CSP004xa06f1.ab1 EST_CSP Nicotiana tabacum cDNA, mRNA sequence [EH             | 86.08   | 1 |
| tc Rep: Chromosome undetermined scaffold_383, whole genome shotgun sequenc            | 359.34  | 1 |



|                                                                                                          |         |   |
|----------------------------------------------------------------------------------------------------------|---------|---|
| tc Rep: MYB transcription factor MYB123 - Glycine max (Soybean), partial (29%) [TC41734]                 | 35.02   | 1 |
| tc Rep: Hypersensitive-induced reaction protein - Capsicum annuum (Bell pepper), partial (96%) [TC41734] | 708.45  | 1 |
| tc Rep: Cytochrome b561 family protein - marine gamma proteobacterium HTCC21                             | 33.28   | 1 |
| Unknown                                                                                                  | 26.98   | 1 |
| gb BL12.101H02F.060309T7 BL12 Nicotiana tabacum cDNA clone BL12.101H02, mRNA                             | 9758.84 | 1 |
| Unknown                                                                                                  | 1119    | 1 |
| tc Rep: Chromosome chr3 scaffold_8, whole genome shotgun sequence - Vitis vinifera                       | 178.41  | 1 |
| tc Rep: Chromosome chr1 scaffold_136, whole genome shotgun sequence - Vitis vinifera                     | 693.97  | 1 |
| gb AGN_RNC014xe20f1.ab1 AGN_RNC Nicotiana tabacum cDNA 5', mRNA sequence                                 | 176.77  | 1 |
| tc Rep: Chromosome undetermined scaffold_296, whole genome shotgun sequence - Vitis vinifera             | 434     | 1 |
| gb TT-18_O10 Burley21 trichome library Nicotiana tabacum cDNA, mRNA sequence                             | 1684.93 | 1 |
| gb AGN_RNC022xb20f1.ab1 AGN_RNC Nicotiana tabacum cDNA 5', mRNA sequence                                 | 74.12   | 1 |
| gb Nicotiana tabacum DNA-binding protein phosphatase 2C (DBP1) mRNA, complete cds [DQ340760]             | 111.52  | 1 |
| tc BAA90353.1 - Arabidopsis thaliana (Mouse-ear cress), partial (78%) [TC41734]                          | 159.41  | 1 |
| gb KP1B.001J22F.050628T7 KP1B Nicotiana tabacum cDNA clone KP1B.001J22, mRNA                             | 63.99   | 1 |
| Unknown                                                                                                  | 139.35  | 1 |
| gb N.tabacum RL2 mRNA for 60S ribosomal protein L2 [X62500]                                              | 20.73   | 1 |
| tc Rep: Chromosome chr18 scaffold_1, whole genome shotgun sequence - Vitis vinifera                      | 410.19  | 1 |
| tc Rep: Chromosome chr12 scaffold_78, whole genome shotgun sequence - Vitis vinifera                     | 21.2    | 1 |
| gb AGN_ELP009xd12f1.ab1 AGN_ELP Nicotiana tabacum cDNA 5', mRNA sequence                                 | 24.25   | 1 |
| gb CHO_SL022xi08f1.ab1 CHO_SL Nicotiana tabacum cDNA, mRNA sequence [EH61]                               | 162.27  | 1 |
| tc Rep: Chromosome chr8 scaffold_23, whole genome shotgun sequence - Vitis vinifera                      | 879.3   | 1 |
| tc Rep: Chromosome chr8 scaffold_29, whole genome shotgun sequence - Vitis vinifera                      | 258.67  | 1 |
| tc Rep: Histone H2A - Vitis vinifera (Grape), partial (96%) [TC55406]                                    | 165.53  | 1 |
| gb KG9B.103J21F.051128T7 KG9B Nicotiana tabacum cDNA clone KG9B.103J21, mRNA                             | 34.07   | 1 |
| gb Nicotiana tabacum sucrose-phosphate synthase isoform B (SPSB) mRNA, complete cds [DQ340760]           | 245.27  | 1 |
| Unknown                                                                                                  | 57.04   | 1 |
| tc Rep: Os01g0610400 protein - Oryza sativa subsp. japonica (Rice), partial (84%) [TC41734]              | 37.81   | 1 |
| Unknown                                                                                                  | 46.62   | 1 |
| gb CHO_SL006xj24f1.ab1 CHO_SL Nicotiana tabacum cDNA, mRNA sequence [EH61]                               | 1635.98 | 1 |
| gb AGN_ELP022xm08f1.ab1 AGN_ELP Nicotiana tabacum cDNA 5', mRNA sequence                                 | 85.01   | 1 |
| gb KN6B.009M21F.050901T7 KN6B Nicotiana tabacum cDNA clone KN6B.009M21, mRNA                             | 390.99  | 1 |
| Unknown                                                                                                  | 23.6    | 1 |
| gb Nicotiana tabacum protein kinase SRK mRNA, complete cds [DQ340760]                                    | 448.57  | 1 |

|                                                                                         |          |   |
|-----------------------------------------------------------------------------------------|----------|---|
| Unknown                                                                                 | 87.83    | 1 |
| tc Rep: Chromosome chr2 scaffold_11, whole genome shotgun sequence - Vitis vin          | 31       | 1 |
| Unknown                                                                                 | 26.31    | 1 |
| gb CHO_SL013xn19f1.ab1 CHO_SL Nicotiana tabacum cDNA, mRNA sequence [EH6                | 92.12    | 1 |
| tc Rep: Chromosome chr6 scaffold_3, whole genome shotgun sequence - Vitis vinif         | 142.29   | 1 |
| Unknown                                                                                 | 81.38    | 1 |
| tc Rep: Thioredoxin peroxidase - Capsicum annuum (Bell pepper), complete [TC448         | 162.57   | 1 |
| Unknown                                                                                 | 156.72   | 1 |
| tc Rep: Phosphoenolpyruvate carboxylase - Ricinus communis (Castor bean), partia        | 134.94   | 1 |
| tc Rep: Isocitrate dehydrogenase (NAD+) precursor - Nicotiana tabacum (Common           | 967.7    | 1 |
| tc Rep: Peptidyl-prolyl cis-trans isomerase - Solanum lycopersicum (Tomato) (Lyco       | 47.48    | 1 |
| tc Rep: 60S ribosomal protein l2 - Oryza sativa subsp. indica (Rice), partial (36%) [TC | 164.84   | 1 |
| Unknown                                                                                 | 28.75    | 1 |
| tc Rep: Phosphate translocator precursor - Nicotiana tabacum (Common tobacco),          | 134.97   | 1 |
| tc Rep: Cytochrome b-c1 complex subunit Rieske-2, mitochondrial precursor - Nico        | 18351.35 | 1 |
| gb KG9B.103M12F.051128T7 KG9B Nicotiana tabacum cDNA clone KG9B.103M12,                 | 607.95   | 1 |
| gb KN6B.101A12F.051230T7 KN6B Nicotiana tabacum cDNA clone KN6B.101A12, n               | 31.91    | 1 |
| gb KR2B.113B15F.060128T7 KR2B Nicotiana tabacum cDNA clone KR2B.113B15, m               | 2334.34  | 1 |
| Unknown                                                                                 | 87.02    | 1 |
| tc Rep: ATP synthase A chain - Psychroflexus torquis ATCC 700755, partial (6%) [TC      | 250.82   | 1 |
| Unknown                                                                                 | 25.16    | 1 |
| gb Nicotiana tabacum clone PR15 mRNA sequence [AF154640]                                | 52383.1  | 1 |
| Unknown                                                                                 | 139.47   | 1 |
| gb KG9B.102A15F.051126T7 KG9B Nicotiana tabacum cDNA clone KG9B.102A15, n               | 34.12    | 1 |
| Unknown                                                                                 | 35.94    | 1 |
| tc Rep: Metallothionein-like protein type 2 - Nicotiana glutinosa (Tobacco), partial (  | 458.9    | 1 |
| Unknown                                                                                 | 18.53    | 1 |
| Unknown                                                                                 | 1002.53  | 1 |
| tc Rep: Chromosome chr14 scaffold_9, whole genome shotgun sequence - Vitis vin          | 26.02    | 1 |
| tc Rep: UDP-glucose:protein transglucosylase-like - Solanum tuberosum (Potato), p       | 1100.78  | 1 |
| gb FTP P2 Tobacco anther cDNA Nicotiana tabacum cDNA similar to NIP aquaporin,          | 11210.55 | 1 |
| tc Rep: Lecithine cholesterol acyltransferase-like protein - Solanum lycopersicum (T    | 96.42    | 1 |
| gb TT-24_K09 Burley21 trichome library Nicotiana tabacum cDNA, mRNA sequence            | 4091.35  | 1 |
| tc Rep: CBL-interacting protein kinase 9 - Populus trichocarpa (Western balsam pop      | 53.08    | 1 |

|                                                                                    |         |   |
|------------------------------------------------------------------------------------|---------|---|
| gb CHO_SL023xl17f1.ab1 CHO_SL Nicotiana tabacum cDNA, mRNA sequence [EH62          | 220.78  | 1 |
| gb TT-29_F23 K326 trichome library Nicotiana tabacum cDNA, mRNA sequence [FG       | 80.85   | 1 |
| Unknown                                                                            | 25.45   | 1 |
| gb KL4B.103H23F.051103T7 KL4B Nicotiana tabacum cDNA clone KL4B.103H23, mF         | 239.4   | 1 |
| tc Rep: Chemotaxis protein CheW - Methanosarcina mazei (Methanosarcina frisia),    | 828.88  | 1 |
| Unknown                                                                            | 768.79  | 1 |
| gb KT7B.100G05F.051010T7 KT7 Nicotiana tabacum cDNA clone KT7B.100G05, mR          | 906.95  | 1 |
| gb KL4B.101J13F.051103T7 KL4B Nicotiana tabacum cDNA clone KL4B.101J13, mRN        | 938.01  | 1 |
| gb KR3B.001M04F.050815T7 KR3B Nicotiana tabacum cDNA clone KR3B.001M04, r          | 22.77   | 1 |
| tc Rep: Chromosome chr9 scaffold_104, whole genome shotgun sequence - Vitis vi     | 47.53   | 1 |
| gb KG9B.102E11F.051126T7 KG9B Nicotiana tabacum cDNA clone KG9B.102E11, m          | 42.49   | 1 |
| gb TT-07_A10 K326 trichome library Nicotiana tabacum cDNA, mRNA sequence [FC       | 213.03  | 1 |
| gb KN6B.103O22F.060103T7 KN6B Nicotiana tabacum cDNA clone KN6B.103O22, r          | 483.84  | 1 |
| tc Rep: Chromosome chr4 scaffold_32, whole genome shotgun sequence - Vitis vin     | 47.97   | 1 |
| Unknown                                                                            | 31.27   | 1 |
| Unknown                                                                            | 254.72  | 1 |
| Unknown                                                                            | 51.83   | 1 |
| tc Rep: Chromosome chr8 scaffold_99, whole genome shotgun sequence - Vitis vin     | 2467.72 | 1 |
| Unknown                                                                            | 60.17   | 1 |
| tc Rep: Alpha chain of nascent polypeptide associated complex - Nicotiana benthar  | 86.49   | 1 |
| tc Rep: ADP ribosylation factor 002 - Daucus carota (Carrot), complete [TC77221]   | 23.52   | 1 |
| Unknown                                                                            | 158.04  | 1 |
| gb AGN_PNL220br1_g11.trimmed.seq AGN_PNL Nicotiana tabacum cDNA 3', mRN.           | 72.89   | 1 |
| Unknown                                                                            | 29.78   | 1 |
| Unknown                                                                            | 2682.74 | 1 |
| tc Rep: Chromosome chr6 scaffold_3, whole genome shotgun sequence - Vitis vinif    | 20.62   | 1 |
| tc Rep: Serine-glyoxylate aminotransferase - Spirodela polyrrhiza (Giant duckweed) | 23.87   | 1 |
| gb CHO_SL028xd07f1.ab1 CHO_SL Nicotiana tabacum cDNA, mRNA sequence [EH6           | 155.41  | 1 |
| gb AGN_PNL215br1_b10.trimmed.seq AGN_PNL Nicotiana tabacum cDNA 3', mRN.           | 22.13   | 1 |
| tc Rep: Chromosome chr13 scaffold_17, whole genome shotgun sequence - Vitis vi     | 182.26  | 1 |
| gb KT7C.113I03F.051221T7 KT7 Nicotiana tabacum cDNA clone KT7C.113I03, mRN,        | 38.86   | 1 |
| Unknown                                                                            | 18.06   | 1 |
| gb FS382929 normalized full-length tobacco cDNA library Nicotiana tabacum cDNA     | 21.83   | 1 |
| gb KF8B.100B16F.151010T7 KF8 Nicotiana tabacum cDNA clone KF8B.100B16, mRN         | 24.39   | 1 |

|                                                                                    |         |   |
|------------------------------------------------------------------------------------|---------|---|
| gb CHO_SL008xl05f1.ab1 CHO_SL Nicotiana tabacum cDNA, mRNA sequence [EH62          | 24.54   | 1 |
| gb AGN_PNL228af1_h10.trimmed.seq AGN_PNL Nicotiana tabacum cDNA 5', mRN,           | 16582.8 | 1 |
| Unknown                                                                            | 35.22   | 1 |
| gb AGN_RNC101xc24f1.ab1 AGN_RNC Nicotiana tabacum cDNA 5', mRNA sequenc            | 73.93   | 1 |
| tc Rep: DSBA oxidoreductase precursor - Ochrobactrum anthropi (strain ATCC 4918    | 18.59   | 1 |
| Unknown                                                                            | 104.57  | 1 |
| gb KG9B.005I19F.050721T7 KG9B Nicotiana tabacum cDNA clone KG9B.005I19, mR         | 41.24   | 1 |
| gb KG9B.102D13F.051126T7 KG9B Nicotiana tabacum cDNA clone KG9B.102D13, n          | 116.62  | 1 |
| Unknown                                                                            | 19.25   | 1 |
| gb KL4B.108D20F.051105T7 KL4B Nicotiana tabacum cDNA clone KL4B.108D20, mF         | 32.73   | 1 |
| gb KP1B.001O22F.050628T7 KP1B Nicotiana tabacum cDNA clone KP1B.001O22, m          | 399.65  | 1 |
| gb KG9B.104B16F.060120T7 KG9B Nicotiana tabacum cDNA clone KG9B.104B16, r          | 56.41   | 1 |
| gb KG9B.104L10F.060120T7 KG9B Nicotiana tabacum cDNA clone KG9B.104L10, m          | 32.82   | 1 |
| Unknown                                                                            | 198.59  | 1 |
| Unknown                                                                            | 20.77   | 1 |
| gb KP1B.102E02F.050722T7 KP1B Nicotiana tabacum cDNA clone KP1B.102E02, mF         | 26.84   | 1 |
| tc Rep: TA4 protein - Oryza sativa subsp. japonica (Rice), partial (38%) [TC47117] | 1546.34 | 1 |
| gb TT-16_G20 K326 late senescent leaf library Nicotiana tabacum cDNA, mRNA seq     | 71.78   | 1 |
| gb KN6B.110P12F.060106T7 KN6B Nicotiana tabacum cDNA clone KN6B.110P12, r          | 216.1   | 1 |
| tc Rep: Chromosome undetermined scaffold_127, whole genome shotgun sequenc         | 28.39   | 1 |
| tc Rep: Chromosome chr12 scaffold_38, whole genome shotgun sequence - Vitis vi     | 151.59  | 1 |
| tc Rep: Chromosome chr14 scaffold_9, whole genome shotgun sequence - Vitis vin     | 31.8    | 1 |
| Unknown                                                                            | 27.79   | 1 |
| gb KP1B.102P22F.050722T7 KP1B Nicotiana tabacum cDNA clone KP1B.102P22, mF         | 102.32  | 1 |
| gb BL12.001I10F.060117T7 BL12 Nicotiana tabacum cDNA clone BL12.001I10, mRN        | 101.24  | 1 |
| Unknown                                                                            | 87.51   | 1 |
| Unknown                                                                            | 4388.22 | 1 |
| tc Rep: Chromosome chr4 scaffold_6, whole genome shotgun sequence - Vitis vinif    | 759.89  | 1 |
| Unknown                                                                            | 30.36   | 1 |
| Unknown                                                                            | 36.08   | 1 |
| gb KL4B.113C19F.060131T7 KL4B Nicotiana tabacum cDNA clone KL4B.113C19, mR         | 511.89  | 1 |
| tc RICRGSBHA Rice gene encoding three ribosomal RNA's: the 17S, 3' end; 5.8S, cor  | 137464  | 1 |
| Unknown                                                                            | 31.55   | 1 |
| Unknown                                                                            | 61.45   | 1 |

|                                                                                   |          |   |
|-----------------------------------------------------------------------------------|----------|---|
| gb CHO_SL024xg05f1.ab1 CHO_SL Nicotiana tabacum cDNA, mRNA sequence [EH6          | 178.39   | 1 |
| gb KP1B.102D24F.050722T7 KP1B Nicotiana tabacum cDNA clone KP1B.102D24, m         | 61.22    | 1 |
| gb KR3B.104B12F.051108T7 KR3B Nicotiana tabacum cDNA clone KR3B.104B12, m         | 2719.1   | 1 |
| gb KL5B.114E19F.060217T7 KL5B Nicotiana tabacum cDNA clone KL5B.114E19, mR        | 1107.92  | 1 |
| gb KG9B.005B18F.050721T7 KG9B Nicotiana tabacum cDNA clone KG9B.005B18, r         | 96.32    | 1 |
| tc Rep: Chromosome chr12 scaffold_18, whole genome shotgun sequence - Vitis vi    | 114.61   | 1 |
| tc Rep: Chromosome chr3 scaffold_117, whole genome shotgun sequence - Vitis vi    | 119.72   | 1 |
| Unknown                                                                           | 55.34    | 1 |
| tc GB AY596684.1 AAT69047.1 F1-ATPase alpha subunit [NP8634928]                   | 7953.46  | 1 |
| Unknown                                                                           | 621.93   | 1 |
| tc Rep: Chromosome undetermined scaffold_3328, whole genome shotgun sequen        | 18.17    | 1 |
| Unknown                                                                           | 17.95    | 1 |
| Unknown                                                                           | 53.94    | 1 |
| gb KN6B.114I07F.060127T7 KN6B Nicotiana tabacum cDNA clone KN6B.114I07, mF        | 79.84    | 1 |
| Unknown                                                                           | 30.11    | 1 |
| gb CHO_SL008xe15f1.ab1 CHO_SL Nicotiana tabacum cDNA, mRNA sequence [EH6          | 173.41   | 1 |
| Unknown                                                                           | 22.36    | 1 |
| tc Rep: Uncharacterized protein At5g64130.3 - Arabidopsis thaliana (Mouse-ear cre | 413.86   | 1 |
| tc Rep: Chromosome chr5 scaffold_64, whole genome shotgun sequence - Vitis vin    | 41.95    | 1 |
| Unknown                                                                           | 903.72   | 1 |
| gb Nicotiana tabacum pollen specific LIM domain protein 1a mRNA, complete cds [   | 48146.25 | 1 |
| Unknown                                                                           | 500.44   | 1 |
| gb AGN_RNC116xe22f1.ab1 AGN_RNC Nicotiana tabacum cDNA 5', mRNA sequenc           | 375.12   | 1 |
| gb KR3B.112E08F.060119T7 KR3B Nicotiana tabacum cDNA clone KR3B.112E08, ml        | 95.53    | 1 |
| Unknown                                                                           | 3518.24  | 1 |
| Unknown                                                                           | 57.09    | 1 |
| gb AGN_RNC121xb17f1.ab1 AGN_RNC Nicotiana tabacum cDNA 5', mRNA sequenc           | 145.85   | 1 |
| gb KL4B.101C10F.051103T7 KL4B Nicotiana tabacum cDNA clone KL4B.101C10, mR        | 190.96   | 1 |
| gb TT-22_H05 K326 trichome library Nicotiana tabacum cDNA, mRNA sequence [FC      | 648.03   | 1 |
| gb FS429988 normalized full-length tobacco cDNA library Nicotiana tabacum cDNA    | 823.35   | 1 |
| tc Rep: Chromosome chr18 scaffold_1, whole genome shotgun sequence - Vitis vin    | 5144.98  | 1 |
| gb KG9B.107O05F.060120T7 KG9B Nicotiana tabacum cDNA clone KG9B.107O05, r         | 41.24    | 1 |
| tc Rep: Chromosome chr7 scaffold_20, whole genome shotgun sequence - Vitis vin    | 34.04    | 1 |
| Unknown                                                                           | 235.81   | 1 |

|                                                                                          |         |   |
|------------------------------------------------------------------------------------------|---------|---|
| tc Rep: Chromosome chr13 scaffold_48, whole genome shotgun sequence - Vitis vi           | 51.64   | 1 |
| gb tbt_000462 Normalized Nicotiana tabacum cDNA library Nicotiana tabacum cDN            | 1111.2  | 1 |
| Unknown                                                                                  | 106.74  | 1 |
| tc Rep: Chromosome chr1 scaffold_5, whole genome shotgun sequence - Vitis vinif          | 186.57  | 1 |
| tc Rep: Poly(A)-binding protein II-like - Brassica campestris (Field mustard), partial ( | 375.55  | 1 |
| Unknown                                                                                  | 124.34  | 1 |
| gb KG9B.105P06F.051128T7 KG9B Nicotiana tabacum cDNA clone KG9B.105P06, m                | 162     | 1 |
| gb AGN_RNC008xi01f1.ab1 AGN_RNC Nicotiana tabacum cDNA 5', mRNA sequence                 | 41.3    | 1 |
| tc Rep: Chromosome chr17 scaffold_12, whole genome shotgun sequence - Vitis vi           | 78.42   | 1 |
| tc Rep: Chromosome chr8 scaffold_23, whole genome shotgun sequence - Vitis vin           | 73.31   | 1 |
| Unknown                                                                                  | 521.6   | 1 |
| Unknown                                                                                  | 207.84  | 1 |
| gb KR2B.109F05F.051229T7 KR2B Nicotiana tabacum cDNA clone KR2B.109F05, m                | 560.63  | 1 |
| tc Rep: Chromosome chr3 scaffold_8, whole genome shotgun sequence - Vitis vinif          | 187.01  | 1 |
| tc Rep: Mitochondrial carrier-like protein - Solanum tuberosum (Potato), partial (8%     | 254.7   | 1 |
| gb KG9B.002J02F.050720T7 KG9B Nicotiana tabacum cDNA clone KG9B.002J02, m                | 191.88  | 1 |
| gb AGN_ELP017xg05f1.ab1 AGN_ELP Nicotiana tabacum cDNA 5', mRNA sequence                 | 284.55  | 1 |
| gb KF8C.101E14F.051214T7 KF8 Nicotiana tabacum cDNA clone KF8C.101E14, mRN               | 19630.4 | 1 |
| gb BL12.103A12F.060309T7 BL12 Nicotiana tabacum cDNA clone BL12.103A12, mR               | 387.2   | 1 |
| Unknown                                                                                  | 21.64   | 1 |
| gb KG9B.001J08F.050628T7 KG9B Nicotiana tabacum cDNA clone KG9B.001J08, m                | 2024.53 | 1 |
| gb KR3B.106I07F.051109T7 KR3B Nicotiana tabacum cDNA clone KR3B.106I07, mR               | 129.44  | 1 |
| gb N.tabacum mRNA for cyclin A-like protein (clone 30) [X92967]                          | 37.57   | 1 |
| gb AM783645 DL, diurnal library Nicotiana tabacum cDNA clone nt005005046, mR             | 166.83  | 1 |
| Unknown                                                                                  | 96.11   | 1 |
| gb FS406615 normalized full-length tobacco cDNA library Nicotiana tabacum cDNA           | 1519.42 | 1 |
| gb KP1B.102E11F.050722T7 KP1B Nicotiana tabacum cDNA clone KP1B.102E11, m                | 27.22   | 1 |
| tc Rep: ATP synthase subunit beta, mitochondrial precursor - Nicotiana plumbagini        | 1020.47 | 1 |
| tc Rep: Chromosome chr19 scaffold_66, whole genome shotgun sequence - Vitis vi           | 188.02  | 1 |
| gb TT-07_D01 K326 early senescent leaf library Nicotiana tabacum cDNA, mRNA se           | 203.61  | 1 |
| gb KL5B.109B20F.060215T7 KL5B Nicotiana tabacum cDNA clone KL5B.109B20, mR               | 1190.57 | 1 |
| gb KL4B.110M21F.051106T7 KL4B Nicotiana tabacum cDNA clone KL4B.110M21, m                | 781.6   | 1 |
| gb KL4B.103L01F.051103T7 KL4B Nicotiana tabacum cDNA clone KL4B.103L01, mR               | 20.67   | 1 |
| tc Rep: Chromosome chr8 scaffold_88, whole genome shotgun sequence - Vitis vin           | 21.96   | 1 |

|                                                                                     |          |   |
|-------------------------------------------------------------------------------------|----------|---|
| Unknown                                                                             | 20.77    | 1 |
| gb AGN_PNL221df1_h10.trimmed.seq AGN_PNL Nicotiana tabacum cDNA 5', mRN.            | 473.94   | 1 |
| gb Nicotiana tabacum mitochondrial Rieske Fe-S protein mRNA, complete cds [M7:      | 17794.35 | 1 |
| Unknown                                                                             | 255.6    | 1 |
| tc Rep: 60S ribosomal protein L13a-like protein - Solanum tuberosum (Potato), con   | 132.48   | 1 |
| tc Rep: Bypass2 - Nicotiana benthamiana, complete [TC47299]                         | 26.56    | 1 |
| Unknown                                                                             | 2984.72  | 1 |
| gb KP1B.109E07F.050727T7 KP1B Nicotiana tabacum cDNA clone KP1B.109E07, mF          | 108.11   | 1 |
| Unknown                                                                             | 70       | 1 |
| gb KP1B.101K12F.050722T7 KP1B Nicotiana tabacum cDNA clone KP1B.101K12, mF          | 83.63    | 1 |
| Unknown                                                                             | 174.17   | 1 |
| tc Rep: GDA2 protein - Pisum sativum (Garden pea), partial (77%) [TC41998]          | 24.09    | 1 |
| gb KR2B.102L10F.051227T7 KR2B Nicotiana tabacum cDNA clone KR2B.102L10, mF          | 231.72   | 1 |
| Unknown                                                                             | 23.8     | 1 |
| gb TT-05_M08 Samsun trichome library Nicotiana tabacum cDNA, mRNA sequence          | 51.27    | 1 |
| Unknown                                                                             | 25.8     | 1 |
| Unknown                                                                             | 29.77    | 1 |
| Unknown                                                                             | 72.35    | 1 |
| Unknown                                                                             | 86.04    | 1 |
| tc Rep: Vacuolar proton-ATPase subunit-like protein - Lotus japonicus, partial (58% | 2166.34  | 1 |
| gb KL5B.118O02F.060217T7 KL5B Nicotiana tabacum cDNA clone KL5B.118O02, mF          | 536.87   | 1 |
| Unknown                                                                             | 21.83    | 1 |
| Unknown                                                                             | 20.99    | 1 |
| Unknown                                                                             | 229.24   | 1 |
| Unknown                                                                             | 954.43   | 1 |
| gb CHO_SL008xh22f1.ab1 CHO_SL Nicotiana tabacum cDNA, mRNA sequence [EH6            | 34.64    | 1 |
| tc Rep: Chromosome chr1 scaffold_22, whole genome shotgun sequence - Vitis vin      | 33.13    | 1 |
| tc Rep: MADS-box protein 15 - Petunia hybrida (Petunia), partial (82%) [TC43610]    | 398.79   | 1 |
| tc Rep: Calreticulin precursor - Nicotiana plumbaginifolia (Leadwort-leaved tobacc  | 397.17   | 1 |
| tc Rep: Chromosome undetermined scaffold_771, whole genome shotgun sequenc          | 20.86    | 1 |
| gb KN6B.103B02F.060103T7 KN6B Nicotiana tabacum cDNA clone KN6B.103B02, r           | 3153.83  | 1 |
| gb KF8B.100H01F.051010T7 KF8 Nicotiana tabacum cDNA clone KF8B.100H01, mR           | 4597.93  | 1 |
| gb KP1B.108B08F.050726T7 KP1B Nicotiana tabacum cDNA clone KP1B.108B08, m           | 53.4     | 1 |
| tc Rep: Small GTP-binding protein domain containing protein, expressed - Oryza sat  | 1461.63  | 1 |

|                                                                                   |         |   |
|-----------------------------------------------------------------------------------|---------|---|
| gb TT-49_O20 K326 late senescent leaf library Nicotiana tabacum cDNA, mRNA seq    | 4484.25 | 1 |
| tc Rep: Hsc70 - Solanum lycopersicum (Tomato) (Lycopersicon esculentum), partial  | 172.91  | 1 |
| tc Rep: Glycine rich protein-interacting protein - Nicotiana tabacum (Common toba | 183.7   | 1 |
| tc Rep: Chromosome chr18 scaffold_1, whole genome shotgun sequence - Vitis vin    | 568.7   | 1 |
| tc Rep: Chromosome chr2 scaffold_140, whole genome shotgun sequence - Vitis vi    | 11635.1 | 1 |
| tc Rep: Chromosome undetermined scaffold_142, whole genome shotgun sequenc        | 36.48   | 1 |
| tc Rep: Chromosome undetermined scaffold_734, whole genome shotgun sequenc        | 32.48   | 1 |
| tc Rep: ATP synthase subunit gamma, mitochondrial precursor - Ipomoea batatas ('  | 973.9   | 1 |
| tc Rep: Chromosome chr7 scaffold_20, whole genome shotgun sequence - Vitis vin    | 144.53  | 1 |
| Unknown                                                                           | 394.93  | 1 |
| gb Nicotiana tabacum NtGPDH mRNA for putative glycerophosphoryl diester phosp     | 67.61   | 1 |
| tc Rep: Chromosome chr13 scaffold_17, whole genome shotgun sequence - Vitis vi    | 183.51  | 1 |
| tc Rep: Genomic DNA, chromosome 5, BAC clone:F6N7 - Arabidopsis thaliana (Mou     | 173.31  | 1 |
| Unknown                                                                           | 2742.88 | 1 |
| Unknown                                                                           | 1001.14 | 1 |
| gb XXXP159 Nicotiana tabacum Pollen PCR-based subtractive library Nicotiana tabac | 151.48  | 1 |
| Unknown                                                                           | 67.08   | 1 |
| Unknown                                                                           | 18.74   | 1 |
| gb ntsm20 embryogenic microspores Nicotiana tabacum cDNA, mRNA sequence [E        | 25.87   | 1 |
| gb KG9B.106M11F.051129T7 KG9B Nicotiana tabacum cDNA clone KG9B.106M11,           | 183.76  | 1 |
| gb KL4B.102H18F.051125T7 KL4B Nicotiana tabacum cDNA clone KL4B.102H18, mF        | 30.29   | 1 |
| gb KG9B.005J05F.050721T7 KG9B Nicotiana tabacum cDNA clone KG9B.005J05, mF        | 131.77  | 1 |
| gb KF8B.201M14F.060124T7 KF8 Nicotiana tabacum cDNA clone KF8B.201M14, mF         | 45.53   | 1 |
| gb KT7C.105J18F.051219T7 KT7 Nicotiana tabacum cDNA clone KT7C.105J18, mRN        | 26.76   | 1 |
| tc Rep: Chromosome chr1 scaffold_84, whole genome shotgun sequence - Vitis vin    | 102.21  | 1 |
| gb KL4B.107B08F.051126T7 KL4B Nicotiana tabacum cDNA clone KL4B.107B08, mR        | 969.24  | 1 |
| Unknown                                                                           | 110.09  | 1 |
| tc Rep: 60S ribosomal protein L10 - Solanum lycopersicum (Tomato) (Lycopersicon   | 171.92  | 1 |
| tc Rep: Chromosome chr18 scaffold_137, whole genome shotgun sequence - Vitis v    | 162.86  | 1 |
| tc Rep: Chromosome chr2 scaffold_11, whole genome shotgun sequence - Vitis vin    | 131.53  | 1 |
| gb Nicotiana tabacum cDNA-AFLP-fragment BSTT12-4-420, cultivar Bright Yellow 2    | 47.93   | 1 |
| gb KG9B.106B12F.051129T7 KG9B Nicotiana tabacum cDNA clone KG9B.106B12, mR        | 1525.8  | 1 |
| Unknown                                                                           | 805.53  | 1 |
| Unknown                                                                           | 80.03   | 1 |



|                                                                                      |         |   |
|--------------------------------------------------------------------------------------|---------|---|
| gb AGN_RPC004xo04f1.ab1 AGN_RPC Nicotiana tabacum cDNA 5', mRNA sequence             | 40.98   | 1 |
| gb KG9B.103K10F.051128T7 KG9B Nicotiana tabacum cDNA clone KG9B.103K10, mRNA         | 512.1   | 1 |
| gb KG9B.102E04F.051126T7 KG9B Nicotiana tabacum cDNA clone KG9B.102E04, mRNA         | 85.89   | 1 |
| Unknown                                                                              | 33.98   | 1 |
| tc Rep: Adenosine kinase isoform 2S - Nicotiana tabacum (Common tobacco), complete   | 526.77  | 1 |
| gb KF8C.108A06F.051215T7 KF8 Nicotiana tabacum cDNA clone KF8C.108A06, mRNA          | 28.66   | 1 |
| tc Rep: At4g08320 - Arabidopsis thaliana (Mouse-ear cress), partial (27%) [TC69685]  | 42.9    | 1 |
| Unknown                                                                              | 538.93  | 1 |
| gb Nicotiana tabacum centrin (CEN1) mRNA, complete cds [AF072519]                    | 29.17   | 1 |
| gb CHO_SL017xn06f1.ab1 CHO_SL Nicotiana tabacum cDNA, mRNA sequence [EH6]            | 186.55  | 1 |
| tc Rep: Chromosome chr3 scaffold_8, whole genome shotgun sequence - Vitis vinifera   | 85.11   | 1 |
| gb BP534049 MAT005 Nicotiana tabacum cDNA clone BY32003, mRNA sequence [E]           | 42.27   | 1 |
| tc Rep: RRM-containing RNA-binding protein-like protein - Solanum tuberosum (Potato) | 25.52   | 1 |
| Unknown                                                                              | 27      | 1 |
| tc Rep: NTGP3 - Nicotiana tabacum (Common tobacco), complete [TC53712]               | 81.9    | 1 |
| gb AM827537 DL, diurnal library Nicotiana tabacum cDNA clone nt005089091, mRNA       | 105.95  | 1 |
| gb AGN_ELP011xe21f1.ab1 AGN_ELP Nicotiana tabacum cDNA 5', mRNA sequence             | 129.54  | 1 |
| tc Rep: Chromosome chr7 scaffold_20, whole genome shotgun sequence - Vitis vinifera  | 152.39  | 1 |
| Unknown                                                                              | 31.48   | 1 |
| Unknown                                                                              | 66.99   | 1 |
| gb AM811486 DL, diurnal library Nicotiana tabacum cDNA clone nt005190038, mRNA       | 52.78   | 1 |
| gb KR2B.001I12F.050815T7 KR2B Nicotiana tabacum cDNA clone KR2B.001I12, mRNA         | 29.37   | 1 |
| Unknown                                                                              | 182.94  | 1 |
| Unknown                                                                              | 43.46   | 1 |
| gb AGN_PNL226bf1_c11.trimmed.seq AGN_PNL Nicotiana tabacum cDNA 5', mRNA             | 70.77   | 1 |
| gb KG9B.002C07F.050720T7 KG9B Nicotiana tabacum cDNA clone KG9B.002C07, mRNA         | 119.23  | 1 |
| Unknown                                                                              | 18.06   | 1 |
| gb AGN_RPC015xe14f1.ab1 AGN_RPC Nicotiana tabacum cDNA 5', mRNA sequence             | 43.31   | 1 |
| Unknown                                                                              | 19.1    | 1 |
| Unknown                                                                              | 434.23  | 1 |
| gb KF8C.102H18F.051214T7 KF8 Nicotiana tabacum cDNA clone KF8C.102H18, mRNA          | 2592.84 | 1 |
| gb TT-11_B01 Samsun trichome library Nicotiana tabacum cDNA, mRNA sequence           | 32.69   | 1 |
| tc Rep: Chromosome chr11 scaffold_13, whole genome shotgun sequence - Vitis vinifera | 46.96   | 1 |
| tc Rep: ATPase - Camellia sinensis (Tea), complete [TC71603]                         | 635.8   | 1 |

|                                                                                          |         |   |
|------------------------------------------------------------------------------------------|---------|---|
| gb KP1B.107F20F.050726T7 KP1B Nicotiana tabacum cDNA clone KP1B.107F20, mF               | 41.22   | 1 |
| gb KL4B.101G14F.051103T7 KL4B Nicotiana tabacum cDNA clone KL4B.101G14, mF               | 912.09  | 1 |
| Unknown                                                                                  | 878.54  | 1 |
| Unknown                                                                                  | 24.46   | 1 |
| gb KL5B.103D14F.060207T7 KL5B Nicotiana tabacum cDNA clone KL5B.103D14, mF               | 180.18  | 1 |
| tc Rep: Chromosome chr4 scaffold_32, whole genome shotgun sequence - Vitis vin           | 101.67  | 1 |
| Unknown                                                                                  | 549.77  | 1 |
| gb AGN_RPC020xo11f1.ab1 AGN_RPC Nicotiana tabacum cDNA 5', mRNA sequenc                  | 81.15   | 1 |
| Unknown                                                                                  | 493.7   | 1 |
| gb EST_FLW001xk08f1.ab1 EST_FLW Nicotiana tabacum cDNA, mRNA sequence [El                | 19.65   | 1 |
| tc Rep: Chromosome chr15 scaffold_40, whole genome shotgun sequence - Vitis vi           | 27.57   | 1 |
| gb TT-12_G09 tobacco leaf library Nicotiana tabacum cDNA, mRNA sequence [FG6:            | 20.69   | 1 |
| tc Rep: Non-specific lipid-transfer protein - Zinnia elegans (Zinnia), partial (25%) [TC | 31.96   | 1 |
| tc Rep: Chromosome chr2 scaffold_11, whole genome shotgun sequence - Vitis vin           | 40.59   | 1 |
| gb Nicotiana tabacum putative calmodulin binding protein-like mRNA, partial sequi        | 71.62   | 1 |
| tc Rep: Heat shock factor binding protein 2 - Zea mays (Maize), partial (72%) [TC53:     | 609.97  | 1 |
| gb KL4B.106P14F.051125T7 KL4B Nicotiana tabacum cDNA clone KL4B.106P14, mR               | 50.07   | 1 |
| gb KG9B.001E24F.050628T7 KG9B Nicotiana tabacum cDNA clone KG9B.001E24, m                | 40.31   | 1 |
| tc Rep: 40S ribosomal protein S15-like - Solanum tuberosum (Potato), complete [TC        | 88.53   | 1 |
| gb AM822222 seedling library, SL Nicotiana tabacum cDNA clone nt002195045, mF            | 45.08   | 1 |
| tc Rep: Chromosome chr9 scaffold_90, whole genome shotgun sequence - Vitis vin           | 267.18  | 1 |
| gb KT7C.105A10F.051219T7 KT7 Nicotiana tabacum cDNA clone KT7C.105A10, mRI               | 28.22   | 1 |
| Unknown                                                                                  | 38.38   | 1 |
| Unknown                                                                                  | 178.82  | 1 |
| gb AGN_RNC030xg21f1.ab1 AGN_RNC Nicotiana tabacum cDNA 5', mRNA sequenc                  | 131.05  | 1 |
| tc Rep: Extensin-like protein - Solanum lycopersicum (Tomato) (Lycopersicon escul        | 8249.71 | 1 |
| Unknown                                                                                  | 513.33  | 1 |
| tc Rep: Cinnamyl alcohol dehydrogenase 1 - Nicotiana tabacum (Common tobacco)            | 119.48  | 1 |
| gb TT-36_M19 K326 late senescent leaf library Nicotiana tabacum cDNA, mRNA sec           | 94.48   | 1 |
| Unknown                                                                                  | 20.87   | 1 |
| gb KP1B.103O09F.050725T7 KP1B Nicotiana tabacum cDNA clone KP1B.103O09, m                | 22.55   | 1 |
| gb AGN_RNC118xk11f1.ab1 AGN_RNC Nicotiana tabacum cDNA 5', mRNA sequenc                  | 148.51  | 1 |
| gb TT-40_H23 tobacco leaf library Nicotiana tabacum cDNA, mRNA sequence [FG6:            | 667.11  | 1 |
| gb KG9B.004H10F.050721T7 KG9B Nicotiana tabacum cDNA clone KG9B.004H10, n                | 195.89  | 1 |

|                                                                                  |          |   |
|----------------------------------------------------------------------------------|----------|---|
| gb TOBESTR050A01 TOBEST cDNA library 1 Nicotiana tabacum cDNA 5', mRNA sequ      | 1283.16  | 1 |
| tc Rep: Chromosome chr18 scaffold_1, whole genome shotgun sequence - Vitis vin   | 159.46   | 1 |
| gb Nicotiana tabacum NtbZIP60 mRNA for basic region leucine zipper protein, com  | 6907.68  | 1 |
| gb AGN_RPC025xk21f1.ab1 AGN_RPC Nicotiana tabacum cDNA 5', mRNA sequence         | 17118.75 | 1 |
| Unknown                                                                          | 157.37   | 1 |
| gb KP1B.107G01F.050726T7 KP1B Nicotiana tabacum cDNA clone KP1B.107G01, m        | 129.78   | 1 |
| gb KG9B.005A19F.050721T7 KG9B Nicotiana tabacum cDNA clone KG9B.005A19, n        | 747.39   | 1 |
| gb AGN_ELP012xk14f1.ab1 AGN_ELP Nicotiana tabacum cDNA 5', mRNA sequence         | 19.78    | 1 |
| gb Nicotiana tabacum putative spindle disassembly related protein CDC48 mRNA, c  | 56.53    | 1 |
| gb N.tabacum npp3 mRNA for protein phosphatase type 1 [Z93770]                   | 29.45    | 1 |
| Unknown                                                                          | 91.66    | 1 |
| gb Nicotiana tabacum peroxisomal acetoacetyl-coenzyme A thiolase (AACT2) mRN.    | 97.92    | 1 |
| gb AGN_RNC007xg14f1.ab1 AGN_RNC Nicotiana tabacum cDNA 5', mRNA sequenc          | 173.7    | 1 |
| Unknown                                                                          | 28.8     | 1 |
| gb AGN_RNC015xp08f1.ab1 AGN_RNC Nicotiana tabacum cDNA 5', mRNA sequenc          | 185.5    | 1 |
| Unknown                                                                          | 40.9     | 1 |
| Unknown                                                                          | 1176.26  | 1 |
| gb KT7B.103J24F.060124T7 KT7 Nicotiana tabacum cDNA clone KT7B.103J24, mRN       | 124.76   | 1 |
| Unknown                                                                          | 846.33   | 1 |
| gb AGN_RNC023xf11f1.ab1 AGN_RNC Nicotiana tabacum cDNA 5', mRNA sequenc          | 84.64    | 1 |
| gb TOBESTR046E09 TOBEST cDNA library 1 Nicotiana tabacum cDNA 5', mRNA sequ      | 65.58    | 1 |
| tc Rep: Phosphatidylinositol synthase - Solanum tuberosum (Potato), complete [TC | 638.98   | 1 |
| gb AGN_RNC014xf06f1.ab1 AGN_RNC Nicotiana tabacum cDNA 5', mRNA sequenc          | 494.7    | 1 |
| tc Rep: 60S ribosomal protein L34 - Nicotiana tabacum (Common tobacco), partial  | 41.37    | 1 |
| gb AGN_RPC015xk16f1.ab1 AGN_RPC Nicotiana tabacum cDNA 5', mRNA sequence         | 594.01   | 1 |
| gb AGN_RPC003xb12f1.ab1 AGN_RPC Nicotiana tabacum cDNA 5', mRNA sequenc          | 20.1     | 1 |
| tc Rep: Chromosome chr14 scaffold_164, whole genome shotgun sequence - Vitis v   | 250.56   | 1 |
| tc Rep: Chromosome chr9 scaffold_7, whole genome shotgun sequence - Vitis vinif  | 168.04   | 1 |
| Unknown                                                                          | 21.26    | 1 |
| tc Rep: Chromosome chr3 scaffold_8, whole genome shotgun sequence - Vitis vinif  | 253.48   | 1 |
| gb CHO_SL005xj24f1.ab1 CHO_SL Nicotiana tabacum cDNA, mRNA sequence [EH61        | 45.45    | 1 |
| tc Rep: Chromosome chr8 scaffold_34, whole genome shotgun sequence - Vitis vin   | 54.29    | 1 |
| gb KG9B.102N08F.051126T7 KG9B Nicotiana tabacum cDNA clone KG9B.102N08, n        | 802.62   | 1 |
| Unknown                                                                          | 330.17   | 1 |

|                                                                                     |         |   |
|-------------------------------------------------------------------------------------|---------|---|
| gb KF8C.109L20F.051215T7 KF8 Nicotiana tabacum cDNA clone KF8C.109L20, mRNA         | 119.03  | 1 |
| gb AM833236 DL, diurnal library Nicotiana tabacum cDNA clone nt005124044, mRNA      | 47.96   | 1 |
| Unknown                                                                             | 148.68  | 1 |
| gb KF8B.100E17F.051010T7 KF8 Nicotiana tabacum cDNA clone KF8B.100E17, mRNA         | 2113.54 | 1 |
| gb BP130642 MAT001 Nicotiana tabacum cDNA clone BY2632, mRNA sequence [Bf           | 85.83   | 1 |
| Unknown                                                                             | 82.17   | 1 |
| Unknown                                                                             | 22.49   | 1 |
| Unknown                                                                             | 258.5   | 1 |
| tc Rep: Kinase-associated protein phosphatase 1 - Solanum peruvianum (Peruvian t    | 99.12   | 1 |
| Unknown                                                                             | 144.72  | 1 |
| Unknown                                                                             | 53.52   | 1 |
| gb AGN_RPC018xb10f1.ab1 AGN_RPC Nicotiana tabacum cDNA 5', mRNA sequenc             | 57.57   | 1 |
| tc Rep: Uncharacterized protein At3g49720 - Arabidopsis thaliana (Mouse-ear cres    | 850.22  | 1 |
| tc Rep: Chromosome chr10 scaffold_50, whole genome shotgun sequence - Vitis vi      | 1159.68 | 1 |
| Unknown                                                                             | 32.67   | 1 |
| gb KL4B.111O15F.060128T7 KL4B Nicotiana tabacum cDNA clone KL4B.111O15, m           | 203.21  | 1 |
| Unknown                                                                             | 24.79   | 1 |
| Unknown                                                                             | 528.61  | 1 |
| Unknown                                                                             | 42.04   | 1 |
| Unknown                                                                             | 184.03  | 1 |
| Unknown                                                                             | 405.73  | 1 |
| tc Rep: At3g12480-like protein - Boechera drummondii (Rock-cress) (Arabis drumm     | 370.2   | 1 |
| Unknown                                                                             | 363.17  | 1 |
| gb AM830869 seedling library, SL Nicotiana tabacum cDNA clone nt002031015, m        | 103.92  | 1 |
| tc Rep: Predicted protein - Physcomitrella patens subsp. patens, partial (81%) [TC4 | 82.43   | 1 |
| tc Rep: L-lysine permease - Bifidobacterium adolescentis (strain ATCC 15703 / DSM   | 24.26   | 1 |
| Unknown                                                                             | 517.95  | 1 |
| Unknown                                                                             | 45.13   | 1 |
| gb KL4B.103M12F.051103T7 KL4B Nicotiana tabacum cDNA clone KL4B.103M12, m           | 31.23   | 1 |
| gb KG9B.001O11F.050628T7 KG9B Nicotiana tabacum cDNA clone KG9B.001O11, r           | 47.85   | 1 |
| Unknown                                                                             | 132.5   | 1 |
| gb Nicotiana tabacum NtVDAC3 mRNA for voltage-dependent anion channel, comp         | 509.98  | 1 |
| gb KP1B.108A10F.050726T7 KP1B Nicotiana tabacum cDNA clone KP1B.108A10, m           | 78.03   | 1 |
| tc Rep: COV1-like protein - Solanum chacoense (Chaco potato), complete [TC77072     | 23.58   | 1 |

|                                                                                      |         |   |
|--------------------------------------------------------------------------------------|---------|---|
| tc Rep: Chromosome chr8 scaffold_23, whole genome shotgun sequence - Vitis vin       | 235.13  | 1 |
| tc Rep: Chromosome chr9 scaffold_7, whole genome shotgun sequence - Vitis vinif      | 53.18   | 1 |
| gb KT7C.106J14F.051219T7 KT7 Nicotiana tabacum cDNA clone KT7C.106J14, mRN           | 17.47   | 1 |
| gb AM800292 seedling library, SL Nicotiana tabacum cDNA clone nt002002017, mF        | 100.88  | 1 |
| gb KR3B.104K14F.051108T7 KR3B Nicotiana tabacum cDNA clone KR3B.104K14, mi           | 24.19   | 1 |
| tc Rep: Chromosome chr19 scaffold_4, whole genome shotgun sequence - Vitis vin       | 31.44   | 1 |
| gb KL4B.102K12F.051125T7 KL4B Nicotiana tabacum cDNA clone KL4B.102K12, mR           | 27.14   | 1 |
| Unknown                                                                              | 83.43   | 1 |
| tc Rep: ChaC-like family protein-like - Solanum tuberosum (Potato), partial (94%) [T | 2335.65 | 1 |
| tc Rep: Chromosome undetermined scaffold_466, whole genome shotgun sequenc           | 248.81  | 1 |
| gb KL4B.107E16F.051126T7 KL4B Nicotiana tabacum cDNA clone KL4B.107E16, mR           | 1853.17 | 1 |
| gb BP133134 MAT001 Nicotiana tabacum cDNA clone BY5366, mRNA sequence [Bf            | 62.03   | 1 |
| Unknown                                                                              | 76.31   | 1 |
| tc Rep: Gip1-like protein - Petunia hybrida (Petunia), partial (93%) [TC55977]       | 21.8    | 1 |
| gb AGN_RNC211xg09f1.ab1 AGN_RNC Nicotiana tabacum cDNA 5', mRNA sequenc              | 52.23   | 1 |
| tc Rep: Chromosome chr17 scaffold_12, whole genome shotgun sequence - Vitis vi       | 17.83   | 1 |
| Unknown                                                                              | 8738.97 | 1 |
| gb AGN_RNC025xm06f1.ab1 AGN_RNC Nicotiana tabacum cDNA 5', mRNA sequen               | 33.09   | 1 |
| tc Rep: Chromosome chr18 scaffold_61, whole genome shotgun sequence - Vitis vi       | 115.69  | 1 |
| gb KF8C.106A10F.051215T7 KF8 Nicotiana tabacum cDNA clone KF8C.106A10, mRN           | 31.98   | 1 |
| Unknown                                                                              | 470.66  | 1 |
| Unknown                                                                              | 40.69   | 1 |
| tc Rep: Zinc finger, ZZ-type; Zinc finger, C2H2-type - Medicago truncatula (Barrel m | 81.6    | 1 |
| tc Rep: Unconventional myosin - Helianthus annuus (Common sunflower), partial (;     | 23.9    | 1 |
| Unknown                                                                              | 19.18   | 1 |
| tc AAD20127.1 - Arabidopsis thaliana (Mouse-ear cress), partial (24%) [TC67580]      | 591.34  | 1 |
| gb CHO_SL025xh14f1.ab1 CHO_SL Nicotiana tabacum cDNA, mRNA sequence [EH6             | 44.97   | 1 |
| Unknown                                                                              | 133.77  | 1 |
| gb AGN_PNL210bf1_f1.trimmed.seq AGN_PNL Nicotiana tabacum cDNA 5', mRNA              | 134.5   | 1 |
| tc Rep: Chromosome chr10 scaffold_50, whole genome shotgun sequence - Vitis vi       | 1084.99 | 1 |
| gb CHO_SL007xb02f1.ab1 CHO_SL Nicotiana tabacum cDNA, mRNA sequence [EH6             | 184.87  | 1 |
| gb KT7C.110F08F.051221T7 KT7 Nicotiana tabacum cDNA clone KT7C.110F08, mRN           | 2223.6  | 1 |
| gb AGN_RNC004xe11f1.ab1 AGN_RNC Nicotiana tabacum cDNA 5', mRNA sequenc              | 128.01  | 1 |
| Unknown                                                                              | 121.98  | 1 |

|                                                                                      |         |   |
|--------------------------------------------------------------------------------------|---------|---|
| Unknown                                                                              | 86.28   | 1 |
| tc Rep: Chromosome undetermined scaffold_252, whole genome shotgun sequenc           | 124.26  | 1 |
| Unknown                                                                              | 247.49  | 1 |
| tc Rep: Chromosome chr7 scaffold_20, whole genome shotgun sequence - Vitis vin       | 274.05  | 1 |
| tc Rep: SufE-like protein, chloroplast precursor - Arabidopsis thaliana (Mouse-ear c | 233.94  | 1 |
| gb AGN_RNC108xh11f1.ab1 AGN_RNC Nicotiana tabacum cDNA 5', mRNA sequenc              | 34.41   | 1 |
| tc Rep: Chromosome chr13 scaffold_48, whole genome shotgun sequence - Vitis vi       | 383.9   | 1 |
| gb TT-36_F05 K326 late senescent leaf library Nicotiana tabacum cDNA, mRNA seqi      | 589.37  | 1 |
| gb KL4B.111F18F.060128T7 KL4B Nicotiana tabacum cDNA clone KL4B.111F18, mR           | 76.35   | 1 |
| gb KP1B.001E04F.050628T7 KP1B Nicotiana tabacum cDNA clone KP1B.001E04, mF           | 59.34   | 1 |
| gb TT-05_K04 Burley21 trichome library Nicotiana tabacum cDNA, mRNA sequence         | 591.76  | 1 |
| Unknown                                                                              | 21.57   | 1 |
| Unknown                                                                              | 20.58   | 1 |
| tc Rep: Plastid quinol oxidase - Solanum lycopersicum (Tomato) (Lycopersicon escu    | 787.11  | 1 |
| Unknown                                                                              | 1228.57 | 1 |
| tc Rep: lipase-related - Arabidopsis thaliana, partial (26%) [TC64373]               | 103.36  | 1 |
| tc Rep: NADH-ubiquinone oxidoreductase 75 kDa subunit, mitochondrial precursor       | 460.28  | 1 |
| gb Nicotiana tabacum DnaJ-like protein mRNA, complete cds [AF191497]                 | 177.76  | 1 |
| tc Rep: Chromosome chr15 scaffold_37, whole genome shotgun sequence - Vitis vi       | 469.46  | 1 |
| gb BP131939 MAT001 Nicotiana tabacum cDNA clone BY4053, mRNA sequence [Bf            | 49.7    | 1 |
| tc Rep: Probable phospholipid hydroperoxide glutathione peroxidase - Nicotiana ta    | 4832.24 | 1 |
| gb KN6B.109B22F.060106T7 KN6B Nicotiana tabacum cDNA clone KN6B.109B22, n            | 199.24  | 1 |
| gb Nicotiana tabacum mRNA for ras-related protein RAB8-1, complete cds [AB079C       | 2732.19 | 1 |
| tc Rep: Dihydrolipoyllysine-residue acetyltransferase component 2 of pyruvate deh    | 4205.63 | 1 |
| Unknown                                                                              | 191.7   | 1 |
| gb KP1B.107E17F.050726T7 KP1B Nicotiana tabacum cDNA clone KP1B.107E17, mF           | 174.03  | 1 |
| Unknown                                                                              | 862.94  | 1 |
| Unknown                                                                              | 19.69   | 1 |
| tc Rep: SGS3-like protein - Solanum lycopersicum (Tomato) (Lycopersicon esculenti    | 24.73   | 1 |
| gb CHO_SL028xd22f1.ab1 CHO_SL Nicotiana tabacum cDNA, mRNA sequence [EH6             | 34.22   | 1 |
| gb KG9B.004B19F.050721T7 KG9B Nicotiana tabacum cDNA clone KG9B.004B19, n            | 975.67  | 1 |
| tc Rep: Ubiquitin fusion protein - Arachis hypogaea (Peanut), complete [TC53803]     | 79.07   | 1 |
| Unknown                                                                              | 145.36  | 1 |
| gb D35-AC12 Ethylene Induced Tobacco Leaf cDNA Library Nicotiana tabacum cDN,        | 407.1   | 1 |

|                                                                                      |          |   |
|--------------------------------------------------------------------------------------|----------|---|
| Unknown                                                                              | 28.38    | 1 |
| tc Rep: Ubiquitin carrier protein - Vitis vinifera (Grape), complete [TC56781]       | 745.9    | 1 |
| Unknown                                                                              | 8223.87  | 1 |
| gb TT-29_D08 K326 trichome library Nicotiana tabacum cDNA, mRNA sequence [FC         | 548.44   | 1 |
| gb 26.2D12 Transformed tobacco Lambda Zap II library Nicotiana tabacum cDNA 5'       | 510.28   | 1 |
| Unknown                                                                              | 189.38   | 1 |
| tc Rep: AT5g66850/MUD21_11 - Arabidopsis thaliana (Mouse-ear cress), partial (17     | 3039.62  | 1 |
| Unknown                                                                              | 110.01   | 1 |
| gb KP1B.107H13F.050726T7 KP1B Nicotiana tabacum cDNA clone KP1B.107H13, m            | 177.28   | 1 |
| gb KF8C.104H23F.051214T7 KF8 Nicotiana tabacum cDNA clone KF8C.104H23, mRI           | 4010.1   | 1 |
| tc Rep: Chromosome chr7 scaffold_20, whole genome shotgun sequence - Vitis vin       | 4316.87  | 1 |
| tc Rep: Succinyl CoA ligase beta subunit - Solanum lycopersicum (Tomato) (Lycoper    | 41.62    | 1 |
| Unknown                                                                              | 46.68    | 1 |
| gb AGN_RNC211xj15f1.ab1 AGN_RNC Nicotiana tabacum cDNA 5', mRNA sequence             | 65.88    | 1 |
| tc Rep: Chromosome chr12 scaffold_78, whole genome shotgun sequence - Vitis vi       | 1019.65  | 1 |
| gb AGN_ELP025xd18f1.ab1 AGN_ELP Nicotiana tabacum cDNA 5', mRNA sequence             | 140.62   | 1 |
| tc Rep: Chromosome chr3 scaffold_8, whole genome shotgun sequence - Vitis vinif      | 190.13   | 1 |
| gb Nicotiana tabacum mRNA for histone H3, complete cds [AB015760]                    | 1593.56  | 1 |
| tc Rep: Shaggy-like kinase 59 - Nicotiana tabacum (Common tobacco), complete [T      | 381.81   | 1 |
| gb Nicotiana tabacum cDNA-AFLP-fragment BSTT2-23-370, cultivar Bright Yellow 2       | 43.57    | 1 |
| tc Rep: Tubby-like F-box protein 7 - Arabidopsis thaliana (Mouse-ear cress), partial | 91.42    | 1 |
| gb AGN_PNL231af1_b2.trimmed.seq AGN_PNL Nicotiana tabacum cDNA 5', mRNA              | 12783.4  | 1 |
| Unknown                                                                              | 33.08    | 1 |
| tc Rep: Chromosome chr10 scaffold_433, whole genome shotgun sequence - Vitis v       | 18272.65 | 1 |
| gb AGN_PNL229af1_c1.trimmed.seq AGN_PNL Nicotiana tabacum cDNA 5', mRNA              | 27.68    | 1 |
| Unknown                                                                              | 267.12   | 1 |
| tc Rep: Chromosome chr17 scaffold_16, whole genome shotgun sequence - Vitis vi       | 23.58    | 1 |
| tc Rep: Chromosome chr4 scaffold_6, whole genome shotgun sequence - Vitis vinif      | 978.51   | 1 |
| gb AGN_ELP015xb20f1.ab1 AGN_ELP Nicotiana tabacum cDNA 5', mRNA sequence             | 41.47    | 1 |
| Unknown                                                                              | 186.12   | 1 |
| gb KP1B.104E07F.050725T7 KP1B Nicotiana tabacum cDNA clone KP1B.104E07, mF           | 2723.56  | 1 |
| tc Rep: Chromosome chr8 scaffold_34, whole genome shotgun sequence - Vitis vin       | 144.78   | 1 |
| Unknown                                                                              | 1572.96  | 1 |
| gb BP534904 MAT005 Nicotiana tabacum cDNA clone BY34113, mRNA sequence [E            | 2195.88  | 1 |

|                                                                                       |         |   |
|---------------------------------------------------------------------------------------|---------|---|
| Unknown                                                                               | 140.68  | 1 |
| Unknown                                                                               | 2716.11 | 1 |
| Unknown                                                                               | 18.98   | 1 |
| Unknown                                                                               | 24.52   | 1 |
| gb AGN_RNC211xc05f1.ab1 AGN_RNC Nicotiana tabacum cDNA 5', mRNA sequenc               | 2828.75 | 1 |
| tc Rep: Chromosome undetermined scaffold_259, whole genome shotgun sequenc            | 93.71   | 1 |
| gb KL4B.102J02F.051125T7 KL4B Nicotiana tabacum cDNA clone KL4B.102J02, mRN           | 1188.06 | 1 |
| gb FS411833 normalized full-length tobacco cDNA library Nicotiana tabacum cDNA        | 9407.13 | 1 |
| Unknown                                                                               | 85.48   | 1 |
| tc Rep: Chromosome chr17 scaffold_101, whole genome shotgun sequence - Vitis v        | 18.57   | 1 |
| Unknown                                                                               | 1054.94 | 1 |
| gb TT-12_E09 Burley21 trichome library Nicotiana tabacum cDNA, mRNA sequence          | 31.72   | 1 |
| gb KL4B.105G15F.051104T7 KL4B Nicotiana tabacum cDNA clone KL4B.105G15, mF            | 226.05  | 1 |
| gb AGN_RNC020xj24f1.ab1 AGN_RNC Nicotiana tabacum cDNA 5', mRNA sequenc               | 136.97  | 1 |
| gb CHO_SL023xn07f1.ab1 CHO_SL Nicotiana tabacum cDNA, mRNA sequence [EH6              | 24.26   | 1 |
| gb Nicotiana tabacum mRNA for alpha-tubulin (tubA3 gene) [AJ421413]                   | 10741.4 | 1 |
| tc Rep: Mini-chromosome maintenance protein - Medicago sativa (Alfalfa), partial      | 70.17   | 1 |
| gb KP1B.112P14F.060117T7 KP1B Nicotiana tabacum cDNA clone KP1B.112P14, mF            | 543.67  | 1 |
| tc Rep: Ribosomal Pr 117 - Triticum aestivum (Wheat), partial (95%) [TC71894]         | 58      | 1 |
| tc Rep: Similarity to kinesin heavy chain - Arabidopsis thaliana (Mouse-ear cress), p | 79.72   | 1 |
| Unknown                                                                               | 22.69   | 1 |
| Unknown                                                                               | 24.84   | 1 |
| Unknown                                                                               | 80.11   | 1 |
| gb Nicotiana tabacum mRNA for putative DNAJ protein [AJ299254]                        | 264.7   | 1 |
| Unknown                                                                               | 512.09  | 1 |
| gb Nicotiana tabacum Bax inhibitor 1 (BI-1) mRNA, complete cds [AF390556]             | 140.05  | 1 |
| gb KF8C.104D13F.051214T7 KF8C Nicotiana tabacum cDNA clone KF8C.104D13, mRN           | 161.47  | 1 |
| Unknown                                                                               | 28.87   | 1 |
| gb KT7C.110O09F.051221T7 KT7C Nicotiana tabacum cDNA clone KT7C.110O09, mR            | 29.85   | 1 |
| Unknown                                                                               | 34.75   | 1 |
| gb KG9B.102F13F.051126T7 KG9B Nicotiana tabacum cDNA clone KG9B.102F13, m             | 36.59   | 1 |
| Unknown                                                                               | 35.19   | 1 |
| gb TT-50_A15 Samsun trichome library Nicotiana tabacum cDNA, mRNA sequence            | 39.05   | 1 |
| gb AGN_PNL210cf1_h6.trimmed.seq AGN_PNL Nicotiana tabacum cDNA 5', mRNA               | 68.01   | 1 |



|                                                                                      |         |   |
|--------------------------------------------------------------------------------------|---------|---|
| tc Rep: Chromosome undetermined scaffold_184, whole genome shotgun sequenc           | 4659.34 | 1 |
| tc Rep: PII protein - Nicotiana tabacum (Common tobacco), partial (65%) [TC72036     | 102.39  | 1 |
| gb KG9B.105B07F.051128T7 KG9B Nicotiana tabacum cDNA clone KG9B.105B07, nr           | 4513.12 | 1 |
| Unknown                                                                              | 5508.4  | 1 |
| gb KT7C.108O06F.051219T7 KT7 Nicotiana tabacum cDNA clone KT7C.108O06, mR            | 78.87   | 1 |
| Unknown                                                                              | 810.38  | 1 |
| gb EST_YP003xb07f1.ab1 EST_YP Nicotiana tabacum cDNA, mRNA sequence [EH61            | 119.66  | 1 |
| gb Nicotiana tabacum mRNA for shaggy-like kinase 111 [AJ002314]                      | 1300.41 | 1 |
| gb TT-04_O04 K326 trichome library Nicotiana tabacum cDNA, mRNA sequence [FC         | 68.12   | 1 |
| gb KN6B.115D14F.060127T7 KN6B Nicotiana tabacum cDNA clone KN6B.115D14, n            | 68.71   | 1 |
| gb TT-36_F01 Samsun trichome library Nicotiana tabacum cDNA, mRNA sequence           | 441.31  | 1 |
| gb KP1B.102H10F.050722T7 KP1B Nicotiana tabacum cDNA clone KP1B.102H10, m            | 129.8   | 1 |
| gb TT-05_M07 K326 late senescent leaf library Nicotiana tabacum cDNA, mRNA sec       | 130.36  | 1 |
| gb FS433138 normalized full-length tobacco cDNA library Nicotiana tabacum cDNA       | 179.25  | 1 |
| gb AGN_RNC018xm19f1.ab1 AGN_RNC Nicotiana tabacum cDNA 5', mRNA sequen               | 608.24  | 1 |
| tc Rep: Dihydroneopterin aldolase - Solanum lycopersicum (Tomato) (Lycopersicon      | 30.37   | 1 |
| tc Rep: Os01g0706500 protein - Oryza sativa subsp. japonica (Rice), complete [TC5(   | 61.96   | 1 |
| gb KP1B.113I05F.060117T7 KP1B Nicotiana tabacum cDNA clone KP1B.113I05, mRI          | 106.31  | 1 |
| gb TT-24_G19 K326 late senescent leaf library Nicotiana tabacum cDNA, mRNA seq       | 380.98  | 1 |
| Unknown                                                                              | 412.66  | 1 |
| Unknown                                                                              | 31.6    | 1 |
| Unknown                                                                              | 29.7    | 1 |
| Unknown                                                                              | 2703.83 | 1 |
| gb AGN_RNC123xg10r1.ab1 AGN_RNC Nicotiana tabacum cDNA 3', mRNA sequenc              | 20.36   | 1 |
| gb KL4B.102H16F.051125T7 KL4B Nicotiana tabacum cDNA clone KL4B.102H16, mF           | 1193.33 | 1 |
| tc Rep: Plastidial delta-12 oleate desaturase - Olea europaea (Common olive), parti  | 28.68   | 1 |
| tc Rep: 26S proteasome subunit 11 - Platanus acerifolia (London plane tree), partial | 185.46  | 1 |
| tc Rep: Chromosome undetermined scaffold_1132, whole genome shotgun sequen           | 32.07   | 1 |
| gb TT-36_L05 K326 late senescent leaf library Nicotiana tabacum cDNA, mRNA seqi      | 141.25  | 1 |
| Unknown                                                                              | 33.56   | 1 |
| Unknown                                                                              | 529.79  | 1 |
| gb KT7C.106O17F.051219T7 KT7 Nicotiana tabacum cDNA clone KT7C.106O17, mR            | 84.72   | 1 |
| gb KT7C.110A05F.051221T7 KT7 Nicotiana tabacum cDNA clone KT7C.110A05, mRI           | 313.59  | 1 |
| Unknown                                                                              | 63.5    | 1 |

|                                                                                              |          |   |
|----------------------------------------------------------------------------------------------|----------|---|
| gb AGN_RPC022xd24f1.ab1 AGN_RPC Nicotiana tabacum cDNA 5', mRNA sequence                     | 18.81    | 1 |
| gb KL4B.104D04F.051104T7 KL4B Nicotiana tabacum cDNA clone KL4B.104D04, mRNA                 | 32.14    | 1 |
| Unknown                                                                                      | 626.71   | 1 |
| Unknown                                                                                      | 32.89    | 1 |
| Unknown                                                                                      | 18357.15 | 1 |
| tc Rep: Chromosome chr12 scaffold_47, whole genome shotgun sequence - Vitis vinifera         | 526.14   | 1 |
| tc Rep: Calcineurin B-like interacting protein kinase - Solanum lycopersicum (Tomato)        | 189.97   | 1 |
| tc Rep: Chromosome chr11 scaffold_13, whole genome shotgun sequence - Vitis vinifera         | 155.92   | 1 |
| gb CHO_SL013xm13f1.ab1 CHO_SL Nicotiana tabacum cDNA, mRNA sequence [EHL66811]               | 578      | 1 |
| Unknown                                                                                      | 18.86    | 1 |
| gb TT-22_G18 tobacco leaf library Nicotiana tabacum cDNA, mRNA sequence [FG62889.2]          | 2889.2   | 1 |
| tc Rep: Chromosome chr18 scaffold_1, whole genome shotgun sequence - Vitis vinifera          | 90.69    | 1 |
| tc Rep: Chromosome chr11 scaffold_13, whole genome shotgun sequence - Vitis vinifera         | 71.79    | 1 |
| Unknown                                                                                      | 117.02   | 1 |
| gb KL5B.111A15F.060117T7 KL5B Nicotiana tabacum cDNA clone KL5B.111A15, mRNA                 | 38.53    | 1 |
| Unknown                                                                                      | 103.8    | 1 |
| tc Rep: Heat stress transcription factor B-2a - Arabidopsis thaliana (Mouse-ear cress)       | 122.71   | 1 |
| gb CHO_SL008xc16f1.ab1 CHO_SL Nicotiana tabacum cDNA, mRNA sequence [EHL66811]               | 472.09   | 1 |
| gb Nicotiana tabacum ipi2 mRNA for isopentenyl diphosphate isomerase 2, complete cds         | 189.87   | 1 |
| tc Rep: Chromosome undetermined scaffold_734, whole genome shotgun sequence - Vitis vinifera | 47.35    | 1 |
| gb KL4B.103F18F.051103T7 KL4B Nicotiana tabacum cDNA clone KL4B.103F18, mRNA                 | 110.03   | 1 |
| Unknown                                                                                      | 130.63   | 1 |
| tc Rep: Importin alpha 1 - Capsicum annuum (Bell pepper), partial (35%) [TC54948]            | 1090.78  | 1 |
| gb AM792648 seedling library, SL Nicotiana tabacum cDNA clone nt002178014, mRNA              | 109.51   | 1 |
| Unknown                                                                                      | 29.86    | 1 |
| Unknown                                                                                      | 29.11    | 1 |
| gb AGN_ELP022xm08f1.ab1 AGN_ELP Nicotiana tabacum cDNA 5', mRNA sequence                     | 18.85    | 1 |
| Unknown                                                                                      | 55.4     | 1 |
| tc Rep: Ethylene-responsive transcription factor 3 - Nicotiana tabacum (Common tobacco)      | 2369.05  | 1 |
| Unknown                                                                                      | 98.51    | 1 |
| gb Nicotiana tabacum ankyrin-repeat protein HBP1 mRNA, complete cds [AF35279]                | 413.09   | 1 |
| tc Rep: Chromosome chr6 scaffold_28, whole genome shotgun sequence - Vitis vinifera          | 21.15    | 1 |
| tc Rep: Chromosome chr7 scaffold_20, whole genome shotgun sequence - Vitis vinifera          | 20.9     | 1 |
| gb Nicotiana tabacum cDNA-AFLP-fragment BSTC3-42-285, cultivar Bright Yellow 2               | 573.04   | 1 |

|                                                                                       |         |   |
|---------------------------------------------------------------------------------------|---------|---|
| gb Nicotiana tabacum NtNRAMP1 mRNA for metal transporter, complete cds [AB5i          | 23.87   | 1 |
| tc Rep: Chromosome chr5 scaffold_2, whole genome shotgun sequence - Vitis vinif       | 65.89   | 1 |
| tc Rep: Chromosome chr14 scaffold_21, whole genome shotgun sequence - Vitis vi        | 21.66   | 1 |
| gb KG9B.002C16F.050720T7 KG9B Nicotiana tabacum cDNA clone KG9B.002C16, r             | 168.84  | 1 |
| tc Rep: Serine/threonine-protein phosphatase PP2A-5 catalytic subunit - Nicotiana     | 718.48  | 1 |
| tc Rep: Casein kinase - Beta vulgaris (Sugar beet), partial (72%) [TC73343]           | 61.12   | 1 |
| gb TT-47_H24 K326 late senescent leaf library Nicotiana tabacum cDNA, mRNA seq        | 443.88  | 1 |
| Unknown                                                                               | 269.96  | 1 |
| Unknown                                                                               | 801.53  | 1 |
| Unknown                                                                               | 29.81   | 1 |
| tc Rep: ATP synthase subunit O, mitochondrial precursor - Ipomoea batatas (Sweet      | 23.61   | 1 |
| Unknown                                                                               | 38.5    | 1 |
| gb KN6B.115E04F.060127T7 KN6B Nicotiana tabacum cDNA clone KN6B.115E04, m             | 108.39  | 1 |
| Unknown                                                                               | 235.23  | 1 |
| gb KG9B.004L12F.050721T7 KG9B Nicotiana tabacum cDNA clone KG9B.004L12, m             | 214.71  | 1 |
| gb KG9B.106J08F.051129T7 KG9B Nicotiana tabacum cDNA clone KG9B.106J08, m             | 104.92  | 1 |
| gb KG9B.002M07F.050720T7 KG9B Nicotiana tabacum cDNA clone KG9B.002M07,               | 411.78  | 1 |
| Unknown                                                                               | 145.02  | 1 |
| tc Rep: Chromosome chr17 scaffold_12, whole genome shotgun sequence - Vitis vi        | 2714.28 | 1 |
| Unknown                                                                               | 105.85  | 1 |
| tc Rep: Chromosome chr2 scaffold_11, whole genome shotgun sequence - Vitis vin        | 177.36  | 1 |
| Unknown                                                                               | 18.36   | 1 |
| Unknown                                                                               | 26.66   | 1 |
| tc Rep: Eukaryotic translation initiation factor 2 beta subunit-like - Solanum tubero | 650.36  | 1 |
| gb Nicotiana tabacum DNA-binding protein 2 (WRKY2) mRNA, complete cds [AF09€          | 86.12   | 1 |
| tc Rep: Pectin methylesterase precursor - Nicotiana glauca (Leadwort-lea              | 1600.05 | 1 |
| Unknown                                                                               | 260.19  | 1 |
| Unknown                                                                               | 95.49   | 1 |
| tc Rep: Chromosome chr5 scaffold_156, whole genome shotgun sequence - Vitis vi        | 9894.16 | 1 |
| gb Nicotiana tabacum partial mRNA for cullin 1C (cul1C gene) [AJ344535]               | 36.47   | 1 |
| gb TT-05_M18 Samsun trichome library Nicotiana tabacum cDNA, mRNA sequence            | 39.3    | 1 |
| Unknown                                                                               | 572.7   | 1 |
| Unknown                                                                               | 42.82   | 1 |
| gb KG9B.105D01F.051128T7 KG9B Nicotiana tabacum cDNA clone KG9B.105D01, n             | 62.57   | 1 |

|                                                                                     |         |   |
|-------------------------------------------------------------------------------------|---------|---|
| tc Rep: Chromosome undetermined scaffold_409, whole genome shotgun sequenc          | 49.22   | 1 |
| gb AGN_ELP003xl18f1.ab1 AGN_ELP Nicotiana tabacum cDNA 5', mRNA sequence            | 657.53  | 1 |
| tc Rep: Chromosome undetermined scaffold_51, whole genome shotgun sequence          | 37.57   | 1 |
| Unknown                                                                             | 133.35  | 1 |
| tc Rep: Aspartic proteinase precursor - Cucurbita pepo (Vegetable marrow) (Summ     | 25.72   | 1 |
| gb KG9B.003D18F.050720T7 KG9B Nicotiana tabacum cDNA clone KG9B.003D18, n           | 25.78   | 1 |
| tc Rep: NADH:ubiquinone oxidoreductase-like - Solanum tuberosum (Potato), com       | 633.7   | 1 |
| gb TL13.110O19F.060320T7 TL13 Nicotiana tabacum cDNA clone TL13.110O19, mR          | 300.16  | 1 |
| Unknown                                                                             | 294.12  | 1 |
| gb CHO_SL017xh04f1.ab1 CHO_SL Nicotiana tabacum cDNA, mRNA sequence [EH6            | 3232.82 | 1 |
| gb Nicotiana tabacum MAPK mRNA for MAP kinase homolog, partial cds [AB19547         | 23.04   | 1 |
| gb FS407121 normalized full-length tobacco cDNA library Nicotiana tabacum cDNA      | 2702.87 | 1 |
| tc Rep: Os01g0706500 protein - Oryza sativa subsp. japonica (Rice), complete [TC7:  | 88.13   | 1 |
| tc Rep: Chromosome undetermined scaffold_147, whole genome shotgun sequenc          | 333.13  | 1 |
| gb KF8C.102G07F.051214T7 KF8 Nicotiana tabacum cDNA clone KF8C.102G07, mRI          | 142.54  | 1 |
| gb KP1B.037D10F.050628T7 KP1B Nicotiana tabacum cDNA clone KP1B.037D10, m           | 56.08   | 1 |
| gb KP1B.001N14F.050628T7 KP1B Nicotiana tabacum cDNA clone KP1B.001N14, m           | 59.56   | 1 |
| Unknown                                                                             | 76.07   | 1 |
| gb KR2B.002L21F.051019T7 KR2B Nicotiana tabacum cDNA clone KR2B.002L21, mF          | 45.9    | 1 |
| Unknown                                                                             | 19.49   | 1 |
| tc Rep: Chromosome chr18 scaffold_1, whole genome shotgun sequence - Vitis vin      | 85.77   | 1 |
| gb KL4B.110E24F.051106T7 KL4B Nicotiana tabacum cDNA clone KL4B.110E24, mR          | 29.15   | 1 |
| gb TT-07_D01 K326 early senescent leaf library Nicotiana tabacum cDNA, mRNA se      | 177.24  | 1 |
| tc Rep: Chromosome chr7 scaffold_31, whole genome shotgun sequence - Vitis vin      | 29.24   | 1 |
| Unknown                                                                             | 1803.5  | 1 |
| Unknown                                                                             | 139.6   | 1 |
| gb AGN_RPC023xo08f1.ab1 AGN_RPC Nicotiana tabacum cDNA 5', mRNA sequenc             | 24.45   | 1 |
| Unknown                                                                             | 30.44   | 1 |
| tc Rep: Protein kinase MK5 - Mesembryanthemum crystallinum (Common ice plant        | 274.45  | 1 |
| tc Rep: Embryo-specific 3 - Medicago truncatula (Barrel medic), partial (63%) [TC52 | 232.94  | 1 |
| Unknown                                                                             | 50.78   | 1 |
| Unknown                                                                             | 46.21   | 1 |
| Unknown                                                                             | 158.25  | 1 |
| Unknown                                                                             | 37.97   | 1 |

|                                                                                        |         |   |
|----------------------------------------------------------------------------------------|---------|---|
| Unknown                                                                                | 168.2   | 1 |
| Unknown                                                                                | 343.68  | 1 |
| tc Rep: 60S ribosomal protein L19 - Capsicum annuum (Bell pepper), partial (32%) [     | 168.96  | 1 |
| Unknown                                                                                | 152.08  | 1 |
| tc Rep: 3-isopropylmalate dehydrogenase 2, chloroplast precursor - Arabidopsis th      | 30.62   | 1 |
| tc Rep: Chromosome undetermined scaffold_183, whole genome shotgun sequenc             | 63.97   | 1 |
| Unknown                                                                                | 50.73   | 1 |
| gb KT7B.107C11F.060124T7 KT7 Nicotiana tabacum cDNA clone KT7B.107C11, mRI             | 271.1   | 1 |
| tc Rep: Shaggy-related protein kinase NtK-1 - Nicotiana tabacum (Common tobacc         | 881.28  | 1 |
| tc Rep: Chromosome chr1 scaffold_75, whole genome shotgun sequence - Vitis vin         | 581.5   | 1 |
| Unknown                                                                                | 18310.8 | 1 |
| tc Rep: Chromosome chr14 scaffold_9, whole genome shotgun sequence - Vitis vin         | 224.23  | 1 |
| Unknown                                                                                | 138.82  | 1 |
| tc Rep: Chromosome undetermined scaffold_226, whole genome shotgun sequenc             | 125.54  | 1 |
| Unknown                                                                                | 71.93   | 1 |
| gb Nicotiana tabacum centrin (CEN1) mRNA, complete cds [AF072519]                      | 24.86   | 1 |
| gb CHO_SL015xk10f2.ab1 CHO_SL Nicotiana tabacum cDNA, mRNA sequence [EH6               | 139.59  | 1 |
| gb TT-15_A22 Burley21 trichome library Nicotiana tabacum cDNA, mRNA sequence           | 330.38  | 1 |
| gb CHO_SL008xa12f1.ab1 CHO_SL Nicotiana tabacum cDNA, mRNA sequence [EH6               | 5236.92 | 1 |
| Unknown                                                                                | 360.11  | 1 |
| tc Rep: Small GTP-binding protein domain containing protein, expressed - Oryza sat     | 8156.25 | 1 |
| gb Nicotiana tabacum clone PR18 mRNA sequence [AF154642]                               | 63.6    | 1 |
| gb KP1B.108G24F.050726T7 KP1B Nicotiana tabacum cDNA clone KP1B.108G24, m              | 2050.48 | 1 |
| tc Rep: Peptidyl-prolyl cis-trans isomerase - Solanum tuberosum (Potato), partial (S   | 1521.22 | 1 |
| tc Rep: Chromosome chr7 scaffold_42, whole genome shotgun sequence - Vitis vinif       | 927.91  | 1 |
| gb TT-01_F03 Samsun trichome library Nicotiana tabacum cDNA, mRNA sequence             | 106.27  | 1 |
| Unknown                                                                                | 84.96   | 1 |
| Unknown                                                                                | 513.15  | 1 |
| tc Rep: Chromosome chr9 scaffold_7, whole genome shotgun sequence - Vitis vinif        | 2691.53 | 1 |
| tc Rep: ADP-ribosylation factor 1 - Arabidopsis thaliana (Mouse-ear cress), partial (: | 2287.16 | 1 |
| tc Rep: Chromosome chr6 scaffold_3, whole genome shotgun sequence - Vitis vinif        | 79.3    | 1 |
| tc Rep: Chromosome chr8 scaffold_34, whole genome shotgun sequence - Vitis vin         | 210.82  | 1 |
| Unknown                                                                                | 26.12   | 1 |
| gb KP1B.001J17F.050628T7 KP1B Nicotiana tabacum cDNA clone KP1B.001J17, mR             | 146.92  | 1 |

|                                                                                               |         |   |
|-----------------------------------------------------------------------------------------------|---------|---|
| gb FS429988 normalized full-length tobacco cDNA library <i>Nicotiana tabacum</i> cDNA         | 744.05  | 1 |
| Unknown                                                                                       | 20.56   | 1 |
| gb KT7C.105C02F.051219T7 KT7 <i>Nicotiana tabacum</i> cDNA clone KT7C.105C02, mRNA            | 134.01  | 1 |
| gb AGN_RNC007xi21f1.ab1 AGN_RNC <i>Nicotiana tabacum</i> cDNA 5', mRNA sequence               | 21.91   | 1 |
| gb BL12.103D11F.060309T7 BL12 <i>Nicotiana tabacum</i> cDNA clone BL12.103D11, mRNA           | 4468.21 | 1 |
| tc Rep: Chromosome chr14 scaffold_21, whole genome shotgun sequence - <i>Vitis vinifera</i>   | 45.93   | 1 |
| Unknown                                                                                       | 22.77   | 1 |
| tc Rep: Chromosome chr19 scaffold_126, whole genome shotgun sequence - <i>Vitis vinifera</i>  | 124.43  | 1 |
| tc Rep: Chromosome undetermined scaffold_89, whole genome shotgun sequence                    | 200.5   | 1 |
| tc Rep: Chromosome chr9 scaffold_7, whole genome shotgun sequence - <i>Vitis vinifera</i>     | 90.69   | 1 |
| Unknown                                                                                       | 23.31   | 1 |
| gb KR2B.102J17F.051227T7 KR2B <i>Nicotiana tabacum</i> cDNA clone KR2B.102J17, mRNA           | 47.04   | 1 |
| Unknown                                                                                       | 31.41   | 1 |
| tc Rep: Chromosome undetermined scaffold_69, whole genome shotgun sequence                    | 521.56  | 1 |
| tc Rep: Hydrogenase-4 component E - <i>Campylobacter concisus</i> (strain 13826), partial     | 41.25   | 1 |
| gb  <i>Nicotiana tabacum</i> DNA-binding protein 2 (WRKY2) mRNA, complete cds [AF096101]      | 100.61  | 1 |
| gb KP1B.102G07F.050722T7 KP1B <i>Nicotiana tabacum</i> cDNA clone KP1B.102G07, mRNA           | 119.14  | 1 |
| tc Rep: Glyceraldehyde-3-phosphate dehydrogenase - <i>Capsicum annuum</i> (Bell pepper)       | 176.75  | 1 |
| gb AGN_PNL221br1_c2.trimmed.seq AGN_PNL <i>Nicotiana tabacum</i> cDNA 3', mRNA                | 28.86   | 1 |
| gb KP1B.101K05F.050722T7 KP1B <i>Nicotiana tabacum</i> cDNA clone KP1B.101K05, mRNA           | 80.84   | 1 |
| gb BP131465 MAT001 <i>Nicotiana tabacum</i> cDNA clone BY3516, mRNA sequence [BF001001]       | 126.18  | 1 |
| Unknown                                                                                       | 38.94   | 1 |
| tc Rep: Chromosome chr9 scaffold_7, whole genome shotgun sequence - <i>Vitis vinifera</i>     | 22.41   | 1 |
| gb KR2B.115G13F.051230T7 KR2B <i>Nicotiana tabacum</i> cDNA clone KR2B.115G13, mRNA           | 104.83  | 1 |
| tc Rep: Chromosome chr11 scaffold_56, whole genome shotgun sequence - <i>Vitis vinifera</i>   | 38.14   | 1 |
| gb KL4B.104H15F.051104T7 KL4B <i>Nicotiana tabacum</i> cDNA clone KL4B.104H15, mRNA           | 46.6    | 1 |
| Unknown                                                                                       | 433.81  | 1 |
| Unknown                                                                                       | 85.36   | 1 |
| gb KN6B.009K14F.050901T7 KN6B <i>Nicotiana tabacum</i> cDNA clone KN6B.009K14, mRNA           | 440.81  | 1 |
| Unknown                                                                                       | 302.36  | 1 |
| tc Rep: Chromosome chr18 scaffold_1, whole genome shotgun sequence - <i>Vitis vinifera</i>    | 2262.12 | 1 |
| gb KL4B.106F14F.051125T7 KL4B <i>Nicotiana tabacum</i> cDNA clone KL4B.106F14, mRNA           | 287.29  | 1 |
| gb  <i>Nicotiana tabacum</i> multicopy suppressor of IRA1 (MSI1) mRNA, complete cds [E001001] | 181.67  | 1 |
| Unknown                                                                                       | 21.87   | 1 |

|                                                                                                        |         |   |
|--------------------------------------------------------------------------------------------------------|---------|---|
| Unknown                                                                                                | 625     | 1 |
| tc Rep: SLL1 protein - <i>Primula vulgaris</i> , partial (73%) [TC56544]                               | 3082.96 | 1 |
| gb TT-20_P09 Samsun trichome library <i>Nicotiana tabacum</i> cDNA, mRNA sequence                      | 98.48   | 1 |
| Unknown                                                                                                | 19.12   | 1 |
| Unknown                                                                                                | 144.75  | 1 |
| Unknown                                                                                                | 136.41  | 1 |
| Unknown                                                                                                | 36.71   | 1 |
| tc Rep: 26S proteasome regulatory subunit S2 - <i>Arabidopsis thaliana</i> (Mouse-ear cr               | 38.98   | 1 |
| tc Rep: Maturase K - <i>Bryanthus gmelini</i> (Heath), partial (7%) [TC74232]                          | 72.11   | 1 |
| tc Rep: ATP synthetase, delta chain - <i>Leifsonia xyli</i> subsp. <i>xyli</i> , partial (5%) [TC53587 | 207.09  | 1 |
| Unknown                                                                                                | 357.36  | 1 |
| gb KG9B.103P03F.051128T7 KG9B <i>Nicotiana tabacum</i> cDNA clone KG9B.103P03, m                       | 32.47   | 1 |
| gb AGN_PNL219af1_g9.trimmed.seq AGN_PNL <i>Nicotiana tabacum</i> cDNA 5', mRNA                         | 365.19  | 1 |
| gb  <i>Nicotiana tabacum</i> geranylgeranylated protein NTGP5 mRNA, complete cds [U6                   | 59.61   | 1 |
| gb CHO_SL001xo03f1.ab1 CHO_SL <i>Nicotiana tabacum</i> cDNA, mRNA sequence [EH6                        | 47.01   | 1 |
| tc Rep: WD domain protein-like - <i>Arabidopsis thaliana</i> (Mouse-ear cress), partial (6             | 717.87  | 1 |
| tc Rep: F2401.12 - <i>Arabidopsis thaliana</i> (Mouse-ear cress), partial (24%) [TC53009]              | 25.63   | 1 |
| tc Rep: Chromosome chr6 scaffold_3, whole genome shotgun sequence - <i>Vitis vinif</i>                 | 1324.4  | 1 |
| tc Rep: Chromosome chr15 scaffold_40, whole genome shotgun sequence - <i>Vitis vi</i>                  | 992.38  | 1 |
| gb KR3B.109I13F.051111T7 KR3B <i>Nicotiana tabacum</i> cDNA clone KR3B.109I13, mRi                     | 535.71  | 1 |
| Unknown                                                                                                | 467.11  | 1 |
| gb KP1B.101M19F.050722T7 KP1B <i>Nicotiana tabacum</i> cDNA clone KP1B.101M19, r                       | 22.77   | 1 |
| tc Rep: Protein TOC75, chloroplast precursor - <i>Pisum sativum</i> (Garden pea), partial              | 24.71   | 1 |
| tc Rep: Chromosome chr18 scaffold_137, whole genome shotgun sequence - <i>Vitis v</i>                  | 21.96   | 1 |
| tc Rep: Chromosome chr2 scaffold_11, whole genome shotgun sequence - <i>Vitis vin</i>                  | 60.58   | 1 |
| tc Rep: Omega-3 fatty acid desaturase - <i>Nicotiana tabacum</i> (Common tobacco), cor                 | 850.74  | 1 |
| tc Rep: F1N21.10 - <i>Arabidopsis thaliana</i> (Mouse-ear cress), partial (25%) [TC67342]              | 50.27   | 1 |
| tc Rep: Chromosome chr19 scaffold_4, whole genome shotgun sequence - <i>Vitis vin</i>                  | 92.17   | 1 |
| gb AGN_ELP006xp09f1.ab1 AGN_ELP <i>Nicotiana tabacum</i> cDNA 5', mRNA sequence                        | 160.82  | 1 |
| tc Rep: Chromosome chr7 scaffold_42, whole genome shotgun sequence - <i>Vitis vin</i>                  | 26.14   | 1 |
| gb  <i>Nicotiana tabacum</i> aspartic protease mRNA, complete cds [DQ648018]                           | 81.93   | 1 |
| Unknown                                                                                                | 180.74  | 1 |
| Unknown                                                                                                | 80.46   | 1 |
| gb KN6B.100O05F.051019T7 KN6B <i>Nicotiana tabacum</i> cDNA clone KN6B.100O05, r                       | 1151.15 | 1 |

|                                                                                      |          |   |
|--------------------------------------------------------------------------------------|----------|---|
| gb TT-29_M09 Burley21 trichome library Nicotiana tabacum cDNA, mRNA sequenc          | 26.91    | 1 |
| Unknown                                                                              | 1439.66  | 1 |
| gb AGN_ELP012xl03f1.ab1 AGN_ELP Nicotiana tabacum cDNA 5', mRNA sequence             | 58.93    | 1 |
| gb KP1B.001A12F.050628T7 KP1B Nicotiana tabacum cDNA clone KP1B.001A12, m            | 29.15    | 1 |
| gb AGN_ELP024xg01f1.ab1 AGN_ELP Nicotiana tabacum cDNA 5', mRNA sequence             | 60.58    | 1 |
| tc Rep: Glutamate dehydrogenase A - Nicotiana glauca (Leadwort-leaved t              | 154.83   | 1 |
| gb AM842139 COL, cold overnight library Nicotiana tabacum cDNA clone nt006046        | 98.23    | 1 |
| Unknown                                                                              | 102.18   | 1 |
| Unknown                                                                              | 1193.23  | 1 |
| tc Rep: 60S ribosomal protein L21-like protein - Solanum tuberosum (Potato), com     | 85.63    | 1 |
| gb BP535041 MAT005 Nicotiana tabacum cDNA clone BY34252, mRNA sequence [E            | 26.85    | 1 |
| tc Rep: 50S ribosomal protein L29, chloroplast precursor - Zea mays (Maize), partia  | 56.45    | 1 |
| gb KT7B.100G14F.051010T7 KT7 Nicotiana tabacum cDNA clone KT7B.100G14, mR            | 115.19   | 1 |
| gb KP1B.001D12F.050628T7 KP1B Nicotiana tabacum cDNA clone KP1B.001D12, m            | 22.05    | 1 |
| gb KL4B.101D05F.051103T7 KL4B Nicotiana tabacum cDNA clone KL4B.101D05, mF           | 514.45   | 1 |
| gb AGN_RNC025xe05f1.ab1 AGN_RNC Nicotiana tabacum cDNA 5', mRNA sequenc              | 1855.41  | 1 |
| gb AGN_RNC129xp14f1.ab1 AGN_RNC Nicotiana tabacum cDNA 5', mRNA sequenc              | 106.76   | 1 |
| gb KL4B.100K21F.050922T7 KL4B Nicotiana tabacum cDNA clone KL4B.100K21, mR           | 18.16    | 1 |
| tc Rep: Chromosome chr17 scaffold_16, whole genome shotgun sequence - Vitis vi       | 643.54   | 1 |
| Unknown                                                                              | 79.95    | 1 |
| tc Rep: Signal recognition particle 14 kDa protein - Arabidopsis thaliana (Mouse-ea  | 231.63   | 1 |
| Unknown                                                                              | 59.79    | 1 |
| gb Nicotiana tabacum Fas-associated factor-like protein mRNA, partial cds [AY7405    | 554.32   | 1 |
| gb FS406426 normalized full-length tobacco cDNA library Nicotiana tabacum cDNA       | 55.96    | 1 |
| tc Rep: Chromosome chr13 scaffold_48, whole genome shotgun sequence - Vitis vi       | 19822.75 | 1 |
| gb KL4B.111B13F.060128T7 KL4B Nicotiana tabacum cDNA clone KL4B.111B13, mR           | 23.9     | 1 |
| Unknown                                                                              | 263.94   | 1 |
| tc Rep: Chromosome chr19 scaffold_4, whole genome shotgun sequence - Vitis vin       | 28.69    | 1 |
| tc Rep: UDP-D-apiose/UDP-D-xylose synthase - Nicotiana benthamiana, partial (41%     | 4337.35  | 1 |
| gb KR2B.110D07F.051229T7 KR2B Nicotiana tabacum cDNA clone KR2B.110D07, m            | 62.46    | 1 |
| tc Rep: Water stress induced protein - Brassica oleracea (Wild cabbage), partial (91 | 4023.57  | 1 |
| tc Rep: Chromosome chr14 scaffold_54, whole genome shotgun sequence - Vitis vi       | 397.3    | 1 |
| Unknown                                                                              | 737.12   | 1 |
| tc Rep: Chromosome chr4 scaffold_39, whole genome shotgun sequence - Vitis vin       | 186.83   | 1 |



|                                                                                      |          |   |
|--------------------------------------------------------------------------------------|----------|---|
| gb KL4B.102L05F.051125T7 KL4B Nicotiana tabacum cDNA clone KL4B.102L05, mRI          | 1301.36  | 1 |
| gb KR3B.104E14F.051108T7 KR3B Nicotiana tabacum cDNA clone KR3B.104E14, mI           | 201.99   | 1 |
| Unknown                                                                              | 22.46    | 1 |
| tc Rep: UDP-glucuronate decarboxylase 1 - Nicotiana tabacum (Common tobacco),        | 12634.05 | 1 |
| Unknown                                                                              | 179.33   | 1 |
| Unknown                                                                              | 126.61   | 1 |
| tc Rep: Chromosome undetermined scaffold_533, whole genome shotgun sequenc           | 113.97   | 1 |
| tc Rep: RNA export 1 - Nicotiana benthamiana, complete [TC48695]                     | 153.99   | 1 |
| gb KF8B.200H02F.060120T7 KF8 Nicotiana tabacum cDNA clone KF8B.200H02, mRI           | 19301.85 | 1 |
| gb KP1B.102N18F.050722T7 KP1B Nicotiana tabacum cDNA clone KP1B.102N18, m            | 123.76   | 1 |
| tc Rep: NAD(P)H:quinone oxidoreductase (NAD(P)H:QR) - Solanum tuberosum (Pot         | 35.27    | 1 |
| tc Rep: COG3307: Lipid A core - O-antigen ligase and related enzymes - Yersinia int  | 376.36   | 1 |
| gb KG9B.001B09F.050628T7 KG9B Nicotiana tabacum cDNA clone KG9B.001B09, r            | 182.42   | 1 |
| tc Rep: Chromosome chr13 scaffold_210, whole genome shotgun sequence - Vitis v       | 100.31   | 1 |
| tc Rep: Methionine synthase - Nicotiana suaveolens, partial (11%) [TC72168]          | 13959.95 | 1 |
| Unknown                                                                              | 141.53   | 1 |
| gb TT-32_H01 tobacco leaf library Nicotiana tabacum cDNA, mRNA sequence [FG6:        | 206.27   | 1 |
| gb KL4B.104P10F.051104T7 KL4B Nicotiana tabacum cDNA clone KL4B.104P10, mR           | 28.27    | 1 |
| gb Nicotiana tabacum squalene synthase mRNA, complete cds [U60057]                   | 9692.98  | 1 |
| gb FS433957 normalized full-length tobacco cDNA library Nicotiana tabacum cDNA       | 61.52    | 1 |
| tc Rep: Chromosome chr6 scaffold_3, whole genome shotgun sequence - Vitis vinif      | 5050.04  | 1 |
| tc Rep: Os01g0279200 protein - Oryza sativa subsp. japonica (Rice), partial (95%) [T | 63.67    | 1 |
| gb KL4B.101H16F.051103T7 KL4B Nicotiana tabacum cDNA clone KL4B.101H16, mF           | 107.33   | 1 |
| Unknown                                                                              | 101.95   | 1 |
| tc Rep: Chromosome undetermined scaffold_147, whole genome shotgun sequenc           | 476.61   | 1 |
| Unknown                                                                              | 23.1     | 1 |
| gb KR3B.110I10F.051111T7 KR3B Nicotiana tabacum cDNA clone KR3B.110I10, mRI          | 26.43    | 1 |
| gb AGN_RNC013xe15f1.ab1 AGN_RNC Nicotiana tabacum cDNA 5', mRNA sequenc              | 332.81   | 1 |
| gb AM828280 seedling library, SL Nicotiana tabacum cDNA clone nt002181074, mF        | 31.52    | 1 |
| gb KF8C.102D02F.051214T7 KF8 Nicotiana tabacum cDNA clone KF8C.102D02, mRI           | 144.52   | 1 |
| Unknown                                                                              | 119.01   | 1 |
| gb KG9B.103G12F.051128T7 KG9B Nicotiana tabacum cDNA clone KG9B.103G12, n            | 152.26   | 1 |
| Unknown                                                                              | 184.63   | 1 |
| tc Rep: Chromosome chr5 scaffold_2, whole genome shotgun sequence - Vitis vinif      | 86.8     | 1 |

|                                                                                     |         |   |
|-------------------------------------------------------------------------------------|---------|---|
| tc Rep: Succinyl-CoA ligase alpha 1 subunit-like - Solanum tuberosum (Potato), part | 65.82   | 1 |
| gb KF8C.101G15F.051214T7 KF8 Nicotiana tabacum cDNA clone KF8C.101G15, mRI          | 523.48  | 1 |
| tc Rep: Glutamyl-tRNA reductase - Nicotiana tabacum (Common tobacco), complet       | 1303.68 | 1 |
| gb KG9B.003N07F.050720T7 KG9B Nicotiana tabacum cDNA clone KG9B.003N07, n           | 915.64  | 1 |
| gb KR3B.102E17F.051107T7 KR3B Nicotiana tabacum cDNA clone KR3B.102E17, ml          | 507.06  | 1 |
| gb CHO_SL024xp10f1.ab1 CHO_SL Nicotiana tabacum cDNA, mRNA sequence [EH6            | 143.53  | 1 |
| gb KL4B.113M01F.060131T7 KL4B Nicotiana tabacum cDNA clone KL4B.113M01, r           | 146.47  | 1 |
| gb AM793740 seedling library, SL Nicotiana tabacum cDNA clone nt002088018, mF       | 73.69   | 1 |
| gb KG9B.003E07F.050720T7 KG9B Nicotiana tabacum cDNA clone KG9B.003E07, m           | 224.13  | 1 |
| Unknown                                                                             | 434.32  | 1 |
| tc Rep: T23E18.20 - Arabidopsis thaliana (Mouse-ear cress), partial (29%) [TC64017  | 186.93  | 1 |
| gb KN6B.104I04F.060103T7 KN6B Nicotiana tabacum cDNA clone KN6B.104I04, mF          | 183.82  | 1 |
| gb TT-20_004 Samsun trichome library Nicotiana tabacum cDNA, mRNA sequence          | 1025.33 | 1 |
| tc Rep: UDP-apiose/xylose synthase - Solanum tuberosum (Potato), partial (90%) [T   | 9783.69 | 1 |
| Unknown                                                                             | 1126.96 | 1 |
| tc Rep: Enoyl-CoA hydratase/isomerase - Bordetella bronchiseptica (Alcaligenes br   | 23.18   | 1 |
| tc Rep: ASH1 protein - Cupiennius salei (Wandering spider), partial (7%) [TC72324]  | 471.29  | 1 |
| gb CHO_SL021xn16f1.ab1 CHO_SL Nicotiana tabacum cDNA, mRNA sequence [EH6            | 18.64   | 1 |
| gb N.tabacum mRNA for phosphoglyceromutase [X70651]                                 | 4449.54 | 1 |
| tc Rep: Chromosome chr11 scaffold_56, whole genome shotgun sequence - Vitis vi      | 27.2    | 1 |
| tc Rep: Pre-mRNA splicing factor - Solanum tuberosum (Potato), partial (26%) [TC7:  | 102.34  | 1 |
| Unknown                                                                             | 20.82   | 1 |
| Unknown                                                                             | 50.71   | 1 |
| Unknown                                                                             | 163.75  | 1 |
| Unknown                                                                             | 1112.55 | 1 |
| gb TT-09_A07 K326 early senescent leaf library Nicotiana tabacum cDNA, mRNA se      | 177.34  | 1 |
| gb KP1B.101J08F.050722T7 KP1B Nicotiana tabacum cDNA clone KP1B.101J08, mR          | 509.04  | 1 |
| tc Rep: Chromosome chr16 scaffold_10, whole genome shotgun sequence - Vitis vi      | 273.61  | 1 |
| gb KF8B.201F08F.060124T7 KF8 Nicotiana tabacum cDNA clone KF8B.201F08, mRN          | 10516.4 | 1 |
| Unknown                                                                             | 107.02  | 1 |
| gb TT-34_N23 tobacco leaf library Nicotiana tabacum cDNA, mRNA sequence [FG6:       | 22      | 1 |
| Unknown                                                                             | 25.49   | 1 |
| Unknown                                                                             | 95.19   | 1 |
| tc Rep: Chromosome chr12 scaffold_18, whole genome shotgun sequence - Vitis vi      | 16.88   | 1 |

|                                                                                       |         |   |
|---------------------------------------------------------------------------------------|---------|---|
| gb AGN_ELP012xj21f1.ab1 AGN_ELP Nicotiana tabacum cDNA 5', mRNA sequence              | 354.64  | 1 |
| tc Rep: Expressed protein - Oryza sativa subsp. japonica (Rice), partial (19%) [TC608 | 53.92   | 1 |
| Unknown                                                                               | 130.04  | 1 |
| tc Rep: Chromosome chr1 scaffold_136, whole genome shotgun sequence - Vitis vi        | 16852.7 | 1 |
| Unknown                                                                               | 447.36  | 1 |
| Unknown                                                                               | 1121.65 | 1 |
| gb KR2B.104F24F.051227T7 KR2B Nicotiana tabacum cDNA clone KR2B.104F24, mf            | 48.56   | 1 |
| Unknown                                                                               | 19.26   | 1 |
| tc Rep: Glucose-6-phosphate isomerase - Solanum tuberosum (Potato), complete [        | 49.13   | 1 |
| Unknown                                                                               | 46.19   | 1 |
| gb Nicotiana tabacum cDNA-AFLP fragment H-N_BC4M23-283 sequence [DQ46015              | 52.67   | 1 |
| gb TOBESTR024A06 TOBEST cDNA library 1 Nicotiana tabacum cDNA 5', mRNA seq            | 188.28  | 1 |
| gb TT-20_F08 tobacco leaf library Nicotiana tabacum cDNA, mRNA sequence [FG63         | 34.36   | 1 |
| Unknown                                                                               | 509.54  | 1 |
| gb KR3B.001M18F.050815T7 KR3B Nicotiana tabacum cDNA clone KR3B.001M18, r             | 124.63  | 1 |
| tc Rep: Chromosome chr6 scaffold_3, whole genome shotgun sequence - Vitis vinif       | 1549.67 | 1 |
| Unknown                                                                               | 40.78   | 1 |
| gb FS419162 normalized full-length tobacco cDNA library Nicotiana tabacum cDNA        | 34.86   | 1 |
| tc Rep: Chromosome chr12 scaffold_18, whole genome shotgun sequence - Vitis vi        | 276.58  | 1 |
| tc Rep: Protein transport SEC13-like protein - Solanum tuberosum (Potato), partial    | 1104.04 | 1 |
| Unknown                                                                               | 86.09   | 1 |
| tc Rep: Chromosome chr3 scaffold_8, whole genome shotgun sequence - Vitis vinif       | 24.99   | 1 |
| tc Rep: Chromosome chr13 scaffold_48, whole genome shotgun sequence - Vitis vi        | 40.57   | 1 |
| tc Rep: Chromosome chr17 scaffold_12, whole genome shotgun sequence - Vitis vi        | 386.65  | 1 |
| Unknown                                                                               | 1575.25 | 1 |
| gb AGN_RPC018xc10f1.ab1 AGN_RPC Nicotiana tabacum cDNA 5', mRNA sequence              | 247.3   | 1 |
| tc Rep: Chromosome chr11 scaffold_13, whole genome shotgun sequence - Vitis vi        | 27.88   | 1 |
| Unknown                                                                               | 880.2   | 1 |
| Unknown                                                                               | 25.05   | 1 |
| tc Rep: Alpha chain of nascent polypeptide associated complex - Nicotiana benthar     | 122.07  | 1 |
| tc Rep: Chromosome chr13 scaffold_17, whole genome shotgun sequence - Vitis vi        | 104.07  | 1 |
| tc Rep: Chromosome chr10 scaffold_297, whole genome shotgun sequence - Vitis v        | 47.37   | 1 |
| Unknown                                                                               | 1582.96 | 1 |
| tc Rep: Chromosome chr14 scaffold_27, whole genome shotgun sequence - Vitis vi        | 91.58   | 1 |

|                                                                                       |          |   |
|---------------------------------------------------------------------------------------|----------|---|
| gb CHO_SL024xo11f1.ab1 CHO_SL Nicotiana tabacum cDNA, mRNA sequence [EH6              | 1107.24  | 1 |
| tc Rep: D-ribose ABC transporter, substrate-binding protein precursor - Clostridium   | 107.12   | 1 |
| gb AGN_RPC014xl21f1.ab1 AGN_RPC Nicotiana tabacum cDNA 5', mRNA sequence              | 63.69    | 1 |
| gb KG9B.106N15F.051129T7 KG9B Nicotiana tabacum cDNA clone KG9B.106N15, n             | 215.34   | 1 |
| Unknown                                                                               | 266.75   | 1 |
| gb KP1B.102P22F.050722T7 KP1B Nicotiana tabacum cDNA clone KP1B.102P22, m             | 72.3     | 1 |
| gb AGN_RPC004xc15f1.ab1 AGN_RPC Nicotiana tabacum cDNA 5', mRNA sequence              | 18.97    | 1 |
| tc Rep: Chromosome chr18 scaffold_1, whole genome shotgun sequence - Vitis vin        | 554.44   | 1 |
| tc Rep: Expressed protein - Oryza sativa subsp. japonica (Rice), partial (7%) [TC6859 | 1284.26  | 1 |
| tc Rep: Serine/threonine protein phosphatase 5 - Solanum lycopersicum (Tomato)        | 53.93    | 1 |
| gb CHO_SL015xj19f2.ab1 CHO_SL Nicotiana tabacum cDNA, mRNA sequence [EH61             | 173.07   | 1 |
| Unknown                                                                               | 691.81   | 1 |
| gb N.tabacum npp2 mRNA for protein phosphatase type 1 [Z93769]                        | 5579.87  | 1 |
| gb KP1B.111E13F.060116T7 KP1B Nicotiana tabacum cDNA clone KP1B.111E13, m             | 106.46   | 1 |
| gb Nicotiana tabacum cDNA-AFLP-fragment BSTC4-41-220, cultivar Bright Yellow 2        | 151.75   | 1 |
| tc Rep: ADP ribosylation factor 002 - Daucus carota (Carrot), complete [TC64847]      | 10606.75 | 1 |
| Unknown                                                                               | 20.88    | 1 |
| Unknown                                                                               | 19.1     | 1 |
| tc Rep: Lipxygenase - Nicotiana attenuata, partial (32%) [TC51546]                    | 42       | 1 |
| gb AGN_PNL222bf1_a11.trimmed.seq AGN_PNL Nicotiana tabacum cDNA 5', mRN               | 24.81    | 1 |
| Unknown                                                                               | 26.59    | 1 |
| tc Rep: Chromosome chr11 scaffold_118, whole genome shotgun sequence - Vitis v        | 533.52   | 1 |
| gb KN6B.103N06F.060103T7 KN6B Nicotiana tabacum cDNA clone KN6B.103N06, r             | 25.6     | 1 |
| tc Rep: Chromosome chr6 scaffold_3, whole genome shotgun sequence - Vitis vinif       | 134.67   | 1 |
| tc Rep: Chromosome chr18 scaffold_137, whole genome shotgun sequence - Vitis v        | 4105.18  | 1 |
| Unknown                                                                               | 81.6     | 1 |
| tc Rep: Avr9/Cf-9 rapidly elicited protein 216 - Nicotiana tabacum (Common tobac      | 255.99   | 1 |
| Unknown                                                                               | 517.65   | 1 |
| gb KG9B.102H18F.051126T7 KG9B Nicotiana tabacum cDNA clone KG9B.102H18, n             | 1039.46  | 1 |
| gb KL5B.115K01F.060302T7 KL5B Nicotiana tabacum cDNA clone KL5B.115K01, mR            | 42.52    | 1 |
| gb AGN_RNC007xf09f1.ab1 AGN_RNC Nicotiana tabacum cDNA 5', mRNA sequenc               | 62.71    | 1 |
| Unknown                                                                               | 766.86   | 1 |
| tc Rep: Chromosome chr9 scaffold_33, whole genome shotgun sequence - Vitis vin        | 1583.57  | 1 |
| gb AGN_RNC010xj24f1.ab1 AGN_RNC Nicotiana tabacum cDNA 5', mRNA sequenc               | 49.12    | 1 |

|                                                                                        |         |   |
|----------------------------------------------------------------------------------------|---------|---|
| Unknown                                                                                | 33.18   | 1 |
| Unknown                                                                                | 777.29  | 1 |
| gb TT-34_B02 Samsun trichome library Nicotiana tabacum cDNA, mRNA sequence             | 26.97   | 1 |
| gb KL4B.106F12F.051125T7 KL4B Nicotiana tabacum cDNA clone KL4B.106F12, mR             | 20.62   | 1 |
| gb KG9B.105I17F.051128T7 KG9B Nicotiana tabacum cDNA clone KG9B.105I17, mR             | 271.87  | 1 |
| gb AGN_RNC116xf14f1.ab1 AGN_RNC Nicotiana tabacum cDNA 5', mRNA sequenc                | 63.68   | 1 |
| Unknown                                                                                | 19.37   | 1 |
| Unknown                                                                                | 2599.69 | 1 |
| tc Rep: Chromosome chr17 scaffold_16, whole genome shotgun sequence - Vitis vi         | 159.03  | 1 |
| gb KP1B.110I21F.050727T7 KP1B Nicotiana tabacum cDNA clone KP1B.110I21, mRI            | 105.52  | 1 |
| gb TT-06_P10 Samsun trichome library Nicotiana tabacum cDNA, mRNA sequence             | 31.46   | 1 |
| Unknown                                                                                | 21.16   | 1 |
| gb KR2B.111C20F.060128T7 KR2B Nicotiana tabacum cDNA clone KR2B.111C20, m              | 29.82   | 1 |
| Unknown                                                                                | 99.64   | 1 |
| Unknown                                                                                | 54.86   | 1 |
| gb CHO_SL002xh18f1.ab1 CHO_SL Nicotiana tabacum cDNA, mRNA sequence [EH6               | 52362.2 | 1 |
| tc Rep: Glucose-6-phosphate/phosphate translocator 1, chloroplast precursor - Ara      | 158.36  | 1 |
| gb TT-04_N01 K326 early senescent leaf library Nicotiana tabacum cDNA, mRNA se         | 139.38  | 1 |
| tc Rep: PSP, proline-rich - Medicago truncatula (Barrel medic), partial (21%) [TC659   | 239.04  | 1 |
| gb AGN_RPC003xm05f1.ab1 AGN_RPC Nicotiana tabacum cDNA 5', mRNA sequenc                | 16.67   | 1 |
| gb KN6B.110I24F.060106T7 KN6B Nicotiana tabacum cDNA clone KN6B.110I24, mF             | 146.96  | 1 |
| Unknown                                                                                | 21.83   | 1 |
| gb TOBESTR050A12 TOBEST cDNA library 1 Nicotiana tabacum cDNA 5', mRNA seqi            | 1068.86 | 1 |
| gb KL4B.111M01F.060128T7 KL4B Nicotiana tabacum cDNA clone KL4B.111M01, m              | 134.76  | 1 |
| tc Rep: 40S ribosomal protein S23 - Fragaria ananassa (Strawberry), complete [TC5i     | 100.21  | 1 |
| Unknown                                                                                | 224.47  | 1 |
| tc Rep: Chromosome chr8 scaffold_88, whole genome shotgun sequence - Vitis vin         | 147.73  | 1 |
| Unknown                                                                                | 287.8   | 1 |
| gb KG9B.004D12F.050721T7 KG9B Nicotiana tabacum cDNA clone KG9B.004D12, n              | 56.12   | 1 |
| gb TT-12_P21 K326 late senescent leaf library Nicotiana tabacum cDNA, mRNA seq         | 1140.63 | 1 |
| tc Rep: Pyruvate kinase - Medicago truncatula (Barrel medic), complete [TC49477]       | 471.4   | 1 |
| tc Rep: Signal recognition particle receptor beta subunit-like protein - Arabidopsis t | 65.28   | 1 |
| Unknown                                                                                | 23.48   | 1 |
| tc Rep: Chromosome chr15 scaffold_40, whole genome shotgun sequence - Vitis vi         | 88.13   | 1 |

|                                                                                              |          |   |
|----------------------------------------------------------------------------------------------|----------|---|
| tc Rep: Chromosome chr9 scaffold_7, whole genome shotgun sequence - Vitis vinifera           | 129.72   | 1 |
| tc Rep: Chromosome chr4 scaffold_6, whole genome shotgun sequence - Vitis vinifera           | 16.28    | 1 |
| tc Rep: Chromosome chr19 scaffold_4, whole genome shotgun sequence - Vitis vinifera          | 906.05   | 1 |
| gb KT7C.104C07F.051219T7 KT7 Nicotiana tabacum cDNA clone KT7C.104C07, mRNA                  | 776.47   | 1 |
| Unknown                                                                                      | 1309.63  | 1 |
| gb AGN_PNL225df1_c5.trimmed.seq AGN_PNL Nicotiana tabacum cDNA 5', mRNA                      | 734.09   | 1 |
| tc Rep: Chromosome chr16 scaffold_10, whole genome shotgun sequence - Vitis vinifera         | 829.2    | 1 |
| tc NTU82638 Nicotiana tabacum small subunit ribosomal RNA gene, mitochondrial                | 55187.35 | 1 |
| tc Rep: Chromosome chr18 scaffold_1, whole genome shotgun sequence - Vitis vinifera          | 34.42    | 1 |
| gb KR3B.112B20F.060119T7 KR3B Nicotiana tabacum cDNA clone KR3B.112B20, mRNA                 | 378.86   | 1 |
| gb TOBESTR034B01 TOBEST cDNA library 1 Nicotiana tabacum cDNA 5', mRNA sequence              | 1339.02  | 1 |
| tc Rep: Chromosome chr3 scaffold_8, whole genome shotgun sequence - Vitis vinifera           | 710.08   | 1 |
| gb TT-04_I24 K326 late senescent leaf library Nicotiana tabacum cDNA, mRNA sequence          | 59.55    | 1 |
| gb KR2B.107D18F.051229T7 KR2B Nicotiana tabacum cDNA clone KR2B.107D18, mRNA                 | 107.14   | 1 |
| Unknown                                                                                      | 256.99   | 1 |
| gb AM833236 DL, diurnal library Nicotiana tabacum cDNA clone nt005124044, mRNA               | 21.08    | 1 |
| gb KT7C.109M22F.051221T7 KT7 Nicotiana tabacum cDNA clone KT7C.109M22, mRNA                  | 24.94    | 1 |
| Unknown                                                                                      | 51.47    | 1 |
| Unknown                                                                                      | 469.17   | 1 |
| tc Rep: Chromosome chr18 scaffold_1, whole genome shotgun sequence - Vitis vinifera          | 122.21   | 1 |
| tc Rep: Dehydroquinate synthase - Solanum lycopersicum (Tomato) (Lycopersicon esculentum)    | 191.19   | 1 |
| Unknown                                                                                      | 74.4     | 1 |
| gb TT-20_H08 K326 late senescent leaf library Nicotiana tabacum cDNA, mRNA sequence          | 65.3     | 1 |
| Unknown                                                                                      | 230.47   | 1 |
| gb AGN_ELP019xm04f1.ab1 AGN_ELP Nicotiana tabacum cDNA 5', mRNA sequence                     | 62.14    | 1 |
| tc Rep: Nod factor-like protein - Plantago major (Common plantain), partial (16%) [AF010000] | 39.87    | 1 |
| gb KF8B.200P05F.060120T7 KF8 Nicotiana tabacum cDNA clone KF8B.200P05, mRNA                  | 87.43    | 1 |
| gb AGN_RNC014xo18f1.ab1 AGN_RNC Nicotiana tabacum cDNA 5', mRNA sequence                     | 1544.99  | 1 |
| tc Rep: Chromosome chr17 scaffold_16, whole genome shotgun sequence - Vitis vinifera         | 244.17   | 1 |
| gb Nicotiana tabacum JEI1 mRNA for hypothetical protein, complete cds [AB300771]             | 632.98   | 1 |
| tc Rep: Chromosome undetermined scaffold_125, whole genome shotgun sequence - Vitis vinifera | 979.16   | 1 |
| gb CHO_SL013xh20f1.ab1 CHO_SL Nicotiana tabacum cDNA, mRNA sequence [EH620000]               | 58.69    | 1 |
| Unknown                                                                                      | 96.27    | 1 |
| Unknown                                                                                      | 184.46   | 1 |

|                                                                                         |         |   |
|-----------------------------------------------------------------------------------------|---------|---|
| tc Rep: Chromosome chr17 scaffold_16, whole genome shotgun sequence - Vitis vi          | 25.87   | 1 |
| gb Nicotiana tabacum vacuole-associated annexin VCaB42 (Anx3) mRNA, complete            | 130.07  | 1 |
| gb KP1B.107P12F.050726T7 KP1B Nicotiana tabacum cDNA clone KP1B.107P12, mR              | 135.05  | 1 |
| tc Rep: Predicted protein - Chlamydomonas reinhardtii, partial (12%) [TC75316]          | 170.78  | 1 |
| gb KF8B.200P07F.060120T7 KF8 Nicotiana tabacum cDNA clone KF8B.200P07, mRN              | 464.87  | 1 |
| tc Rep: Chromosome chr8 scaffold_68, whole genome shotgun sequence - Vitis vin          | 1158.01 | 1 |
| Unknown                                                                                 | 27.3    | 1 |
| gb CHO_SL011xg05f1.ab1 CHO_SL Nicotiana tabacum cDNA, mRNA sequence [EH6                | 518.95  | 1 |
| Unknown                                                                                 | 23.14   | 1 |
| gb CHO_SL022xi08f1.ab1 CHO_SL Nicotiana tabacum cDNA, mRNA sequence [EH61               | 172.73  | 1 |
| tc Rep: Chromosome chr4 scaffold_6, whole genome shotgun sequence - Vitis vinif         | 27.83   | 1 |
| gb KF8B.201A20F.060124T7 KF8 Nicotiana tabacum cDNA clone KF8B.201A20, mRN              | 80.37   | 1 |
| gb Nicotiana tabacum topoisomerase I (TOP I) mRNA, complete cds [AF115482]              | 1165.77 | 1 |
| Unknown                                                                                 | 18.88   | 1 |
| tc Rep: Cyclin-like F-box - Medicago truncatula (Barrel medic), partial (64%) [TC549    | 255.5   | 1 |
| gb AGN_RNC017xd12f1.ab1 AGN_RNC Nicotiana tabacum cDNA 5', mRNA sequenc                 | 1599.73 | 1 |
| gb KT7C.104H17F.051219T7 KT7 Nicotiana tabacum cDNA clone KT7C.104H17, mRN              | 328.81  | 1 |
| tc Rep: Chromosome undetermined scaffold_147, whole genome shotgun sequenc              | 88.79   | 1 |
| tc Rep: Protein kinase-like protein - Vitis aestivalis (Grape), partial (82%) [TC48691] | 941.13  | 1 |
| gb KL4B.109B14F.051108T7 KL4B Nicotiana tabacum cDNA clone KL4B.109B14, mRN             | 23.12   | 1 |
| gb AGN_PNL214dr1_b6.trimmed.seq AGN_PNL Nicotiana tabacum cDNA 3', mRNA                 | 33.32   | 1 |
| Unknown                                                                                 | 49.97   | 1 |
| gb Nicotiana tabacum A20 mRNA for hypothetical protein, complete cds [AB03253           | 27.1    | 1 |
| Unknown                                                                                 | 88.01   | 1 |
| Unknown                                                                                 | 106.38  | 1 |
| Unknown                                                                                 | 145.06  | 1 |
| tc Rep: Chromosome chr1 scaffold_136, whole genome shotgun sequence - Vitis vi          | 30.01   | 1 |
| tc Rep: Chromosome chr9 scaffold_7, whole genome shotgun sequence - Vitis vinif         | 38.15   | 1 |
| Unknown                                                                                 | 23.62   | 1 |
| Unknown                                                                                 | 238.73  | 1 |
| Unknown                                                                                 | 21.17   | 1 |
| tc Rep: Chromosome chr8 scaffold_106, whole genome shotgun sequence - Vitis vi          | 152.47  | 1 |
| gb N.tabacum NtK-1 mRNA [X77763]                                                        | 296.24  | 1 |
| tc Rep: Ubiquitin fusion protein - Arachis hypogaea (Peanut), complete [TC54478]        | 236.05  | 1 |

|                                                                                      |         |   |
|--------------------------------------------------------------------------------------|---------|---|
| tc Rep: Chromosome chr4 scaffold_333, whole genome shotgun sequence - Vitis vi       | 30.35   | 1 |
| gb TT-06_O22 K326 late senescent leaf library Nicotiana tabacum cDNA, mRNA seq       | 2679.4  | 1 |
| Unknown                                                                              | 48.48   | 1 |
| tc Rep: Predicted protein - Physcomitrella patens subsp. patens, partial (19%) [TC54 | 66.53   | 1 |
| gb BP129575 MAT001 Nicotiana tabacum cDNA clone BY1446, mRNA sequence [BF            | 32.65   | 1 |
| Unknown                                                                              | 3144.59 | 1 |
| Unknown                                                                              | 171.96  | 1 |
| gb AGN_ELP007xh11f1.ab1 AGN_ELP Nicotiana tabacum cDNA 5', mRNA sequence             | 20.45   | 1 |
| tc Rep: Chromosome chr5 scaffold_67, whole genome shotgun sequence - Vitis vin       | 132.63  | 1 |
| gb KF8B.202O12F.060124T7 KF8 Nicotiana tabacum cDNA clone KF8B.202O12, mRi           | 152.83  | 1 |
| gb KT7C.113C13F.051221T7 KT7 Nicotiana tabacum cDNA clone KT7C.113C13, mRi           | 81.11   | 1 |
| gb N.tabacum mRNA for pyruvate kinase (plastid isozyme) [Z28373]                     | 45.5    | 1 |
| gb AGN_RNC015xg11f1.ab1 AGN_RNC Nicotiana tabacum cDNA 5', mRNA sequenc              | 98.16   | 1 |
| tc Rep: Chromosome undetermined scaffold_168, whole genome shotgun sequenc           | 27.7    | 1 |
| gb KN6B.113A23F.060127T7 KN6B Nicotiana tabacum cDNA clone KN6B.113A23, n            | 28.12   | 1 |
| gb TT-24_M01 K326 trichome library Nicotiana tabacum cDNA, mRNA sequence [F1         | 66.11   | 1 |
| gb CHO_SL007xl24f1.ab1 CHO_SL Nicotiana tabacum cDNA, mRNA sequence [EH62            | 983.13  | 1 |
| Unknown                                                                              | 1102.53 | 1 |
| Unknown                                                                              | 41.24   | 1 |
| Unknown                                                                              | 80.53   | 1 |
| gb AGN_PNL226ar1_d7.trimmed.seq AGN_PNL Nicotiana tabacum cDNA 3', mRNA              | 137.64  | 1 |
| Unknown                                                                              | 18.74   | 1 |
| gb KF8C.101J07F.051214T7 KF8 Nicotiana tabacum cDNA clone KF8C.101J07, mRN           | 49.93   | 1 |
| Unknown                                                                              | 1765.7  | 1 |
| tc Rep: Ubiquitin - Hevea brasiliensis (Para rubber tree), partial (67%) [TC48522]   | 2501.15 | 1 |
| gb KR3B.107H08F.051110T7 KR3B Nicotiana tabacum cDNA clone KR3B.107H08, m            | 415.56  | 1 |
| gb KP1B.101P10F.050722T7 KP1B Nicotiana tabacum cDNA clone KP1B.101P10, mI           | 399.02  | 1 |
| gb KR2B.101F09F.060128T7 KR2B Nicotiana tabacum cDNA clone KR2B.101F09, mI           | 7701.34 | 1 |
| gb KG9B.107G17F.060120T7 KG9B Nicotiana tabacum cDNA clone KG9B.107G17, n            | 997.02  | 1 |
| Unknown                                                                              | 8865.1  | 1 |
| tc Rep: Carbonic anhydrase - Solanum lycopersicum (Tomato) (Lycopersicon escul       | 20.9    | 1 |
| tc Rep: Chromosome chr18 scaffold_1, whole genome shotgun sequence - Vitis vin       | 43.03   | 1 |
| gb EST_CSP004xo20f1.ab1 EST_CSP Nicotiana tabacum cDNA, mRNA sequence [EH            | 35.92   | 1 |
| tc Rep: NADPH--cytochrome P450 reductase - Phaseolus aureus (Mung bean) (Vign        | 144.29  | 1 |



|                                                                                          |          |   |
|------------------------------------------------------------------------------------------|----------|---|
| gb AGN_RPC012xb10f1.ab1 AGN_RPC Nicotiana tabacum cDNA 5', mRNA sequence                 | 21.21    | 1 |
| Unknown                                                                                  | 2722.47  | 1 |
| tc Rep: Chromosome chr3 scaffold_8, whole genome shotgun sequence - Vitis vinifera       | 31.32    | 1 |
| tc Rep: Isopentenyl diphosphate isomerase 2 - Nicotiana tabacum (Common tobacco)         | 139.65   | 1 |
| Unknown                                                                                  | 130.72   | 1 |
| Unknown                                                                                  | 64.36    | 1 |
| Unknown                                                                                  | 32.98    | 1 |
| tc Rep: UTP--glucose-1-phosphate uridylyltransferase - Solanum tuberosum (Potato)        | 57.79    | 1 |
| Unknown                                                                                  | 92.35    | 1 |
| tc Rep: Autophagy-related protein 3 - Vitis vinifera (Grape), complete [TC47245]         | 42.14    | 1 |
| Unknown                                                                                  | 19.04    | 1 |
| gb EST_CSP004xe10f1.ab1 EST_CSP Nicotiana tabacum cDNA, mRNA sequence [EH000001]         | 118.38   | 1 |
| tc Rep: Chromosome chr8 scaffold_68, whole genome shotgun sequence - Vitis vinifera      | 195.45   | 1 |
| gb Nicotiana tabacum clone 7 poly(A)-binding protein (PABP) mRNA, partial cds [AF000001] | 87.61    | 1 |
| tc Rep: Chromosome chr10 scaffold_433, whole genome shotgun sequence - Vitis vinifera    | 468.76   | 1 |
| Unknown                                                                                  | 67.63    | 1 |
| gb AGN_RNC012xc16f1.ab1 AGN_RNC Nicotiana tabacum cDNA 5', mRNA sequence                 | 31.24    | 1 |
| Unknown                                                                                  | 44.7     | 1 |
| tc Rep: Chromosome chr12 scaffold_47, whole genome shotgun sequence - Vitis vinifera     | 76.24    | 1 |
| Unknown                                                                                  | 1129.05  | 1 |
| gb KR3B.102K16F.051107T7 KR3B Nicotiana tabacum cDNA clone KR3B.102K16, mRNA sequence    | 90.35    | 1 |
| gb AGN_RNC110xf12f1.ab1 AGN_RNC Nicotiana tabacum cDNA 5', mRNA sequence                 | 96.7     | 1 |
| gb Nicotiana tabacum mRNA for protein kinase NPK5, complete cds [D26602]                 | 546.65   | 1 |
| gb KT7C.104P02F.051219T7 KT7 Nicotiana tabacum cDNA clone KT7C.104P02, mRNA sequence     | 106.9    | 1 |
| tc Rep: Actin - Phalaenopsis hybrid cultivar, partial (39%) [TC69811]                    | 22878.35 | 1 |
| Unknown                                                                                  | 18.88    | 1 |
| tc Rep: Chromosome chr5 scaffold_2, whole genome shotgun sequence - Vitis vinifera       | 137.66   | 1 |
| gb TT-38_D16 Burley21 trichome library Nicotiana tabacum cDNA, mRNA sequence             | 83.86    | 1 |
| tc Rep: RNA-binding protein AKIP1-like - Solanum tuberosum (Potato), partial (29%)       | 185.76   | 1 |
| tc Rep: Chromosome chr14 scaffold_9, whole genome shotgun sequence - Vitis vinifera      | 59.86    | 1 |
| Unknown                                                                                  | 110.21   | 1 |
| gb Nicotiana tabacum partial mRNA for hypothetical protein, clone PBF80non [AJ300001]    | 41.97    | 1 |
| tc Rep: Chromosome chr6 scaffold_3, whole genome shotgun sequence - Vitis vinifera       | 79.45    | 1 |
| Unknown                                                                                  | 23.64    | 1 |

|                                                                                  |         |   |
|----------------------------------------------------------------------------------|---------|---|
| tc Rep: 40S ribosomal protein S5 - Capsicum annuum (Bell pepper), complete [TC4C | 131.5   | 1 |
| gb KL4B.111H15F.060128T7 KL4B Nicotiana tabacum cDNA clone KL4B.111H15, mF       | 57.62   | 1 |
| gb KG9B.103D21F.051128T7 KG9B Nicotiana tabacum cDNA clone KG9B.103D21, n        | 52.32   | 1 |
| tc Rep: Prohibitin - Nicotiana tabacum (Common tobacco), complete [TC52074]      | 20.97   | 1 |
| gb AM789925 COL, cold overnight library Nicotiana tabacum cDNA clone nt006213    | 32      | 1 |
| tc Rep: Chromosome chr16 scaffold_86, whole genome shotgun sequence - Vitis vi   | 84.41   | 1 |
| Unknown                                                                          | 23.87   | 1 |
| gb AGN_ELP024xi02f1.ab1 AGN_ELP Nicotiana tabacum cDNA 5', mRNA sequence         | 18.95   | 1 |
| gb CHO_SL023xa21f1.ab1 CHO_SL Nicotiana tabacum cDNA, mRNA sequence [EH6         | 7444.3  | 1 |
| gb AGN_RNC007xk10f1.ab1 AGN_RNC Nicotiana tabacum cDNA 5', mRNA sequenc          | 51.45   | 1 |
| tc Rep: Predicted protein - Chlamydomonas reinhardtii, partial (3%) [TC56068]    | 1037.75 | 1 |
| gb AGN_RNC022xe16f1.ab1 AGN_RNC Nicotiana tabacum cDNA 5', mRNA sequenc          | 20.94   | 1 |
| gb TT-47_L19 Samsun trichome library Nicotiana tabacum cDNA, mRNA sequence [     | 44.51   | 1 |
| gb KN6B.100K15F.051019T7 KN6B Nicotiana tabacum cDNA clone KN6B.100K15, n        | 124.24  | 1 |
| gb KL4B.104H18F.051104T7 KL4B Nicotiana tabacum cDNA clone KL4B.104H18, mF       | 342.42  | 1 |
| tc Rep: Chromosome undetermined scaffold_11, whole genome shotgun sequence       | 126.84  | 1 |
| tc Rep: Chromosome chr13 scaffold_48, whole genome shotgun sequence - Vitis vi   | 24.14   | 1 |
| gb KG9B.003E17F.050720T7 KG9B Nicotiana tabacum cDNA clone KG9B.003E17, m        | 20.63   | 1 |
| gb 2A03 Transformed tobacco Lambda Zap II library Nicotiana tabacum cDNA 5', m   | 265.9   | 1 |
| Unknown                                                                          | 45.25   | 1 |
| tc Rep: Chromosome chr7 scaffold_20, whole genome shotgun sequence - Vitis vin   | 81.87   | 1 |
| gb TOBESTR030H01 TOBEST cDNA library 1 Nicotiana tabacum cDNA 5', mRNA seq       | 19.27   | 1 |
| Unknown                                                                          | 1551.86 | 1 |
| gb Nicotiana tabacum heat shock protein 90 (OINtHsp90) mRNA, complete cds [AY    | 257.73  | 1 |
| gb TT-36_J10 tobacco leaf library Nicotiana tabacum cDNA, mRNA sequence [FG63    | 56.45   | 1 |
| gb KR3B.101I10F.051107T7 KR3B Nicotiana tabacum cDNA clone KR3B.101I10, mRl      | 472.76  | 1 |
| gb KG9B.103H05F.051128T7 KG9B Nicotiana tabacum cDNA clone KG9B.103H05, n        | 19.9    | 1 |
| gb KF8C.103J19F.051214T7 KF8 Nicotiana tabacum cDNA clone KF8C.103J19, mRN       | 185.7   | 1 |
| gb KG9B.002K06F.050720T7 KG9B Nicotiana tabacum cDNA clone KG9B.002K06, m        | 84.51   | 1 |
| Unknown                                                                          | 373.11  | 1 |
| Unknown                                                                          | 116.97  | 1 |
| gb AGN_RPC009xp03f1.ab1 AGN_RPC Nicotiana tabacum cDNA 5', mRNA sequenc          | 288.11  | 1 |
| tc Rep: Chromosome chr11 scaffold_13, whole genome shotgun sequence - Vitis vi   | 1092.34 | 1 |
| Unknown                                                                          | 237.86  | 1 |

|                                                                                   |         |   |
|-----------------------------------------------------------------------------------|---------|---|
| tc Rep: Proline oxidase/dehydrogenase 2 - Nicotiana tabacum (Common tobacco),     | 264.64  | 1 |
| gb Nicotiana tabacum chaperone GrpE type 2 (GrpE2) mRNA, nuclear gene encodir     | 36.74   | 1 |
| Unknown                                                                           | 99.72   | 1 |
| tc Rep: Chromosome chr4 scaffold_6, whole genome shotgun sequence - Vitis vinif   | 251.3   | 1 |
| tc Rep: Chromosome chr2 scaffold_105, whole genome shotgun sequence - Vitis vi    | 87.78   | 1 |
| tc Rep: Small GTP-binding protein - Carica papaya (Papaya), complete [TC59352]    | 44.4    | 1 |
| Unknown                                                                           | 49.17   | 1 |
| gb AM782816 DL, diurnal library Nicotiana tabacum cDNA clone nt005252007, mRI     | 51.53   | 1 |
| gb KF8C.106H14F.051215T7 KF8 Nicotiana tabacum cDNA clone KF8C.106H14, mRI        | 27.77   | 1 |
| Unknown                                                                           | 631.51  | 1 |
| Unknown                                                                           | 436.52  | 1 |
| Unknown                                                                           | 22.07   | 1 |
| gb KP1B.102K14F.050722T7 KP1B Nicotiana tabacum cDNA clone KP1B.102K14, mI        | 180.04  | 1 |
| tc Rep: Chromosome chr3 scaffold_8, whole genome shotgun sequence - Vitis vinif   | 50.06   | 1 |
| gb KG9B.105G17F.051128T7 KG9B Nicotiana tabacum cDNA clone KG9B.105G17, n         | 483.17  | 1 |
| tc Rep: Chromosome chr6 scaffold_3, whole genome shotgun sequence - Vitis vinif   | 121.57  | 1 |
| Unknown                                                                           | 37.28   | 1 |
| Unknown                                                                           | 135.65  | 1 |
| Unknown                                                                           | 87      | 1 |
| tc Rep: Chromosome chr9 scaffold_7, whole genome shotgun sequence - Vitis vinif   | 120.6   | 1 |
| gb KF8C.105E21F.051215T7 KF8 Nicotiana tabacum cDNA clone KF8C.105E21, mRN        | 1563.06 | 1 |
| tc Rep: Chromosome chr1 scaffold_75, whole genome shotgun sequence - Vitis vin    | 77.81   | 1 |
| gb KL5B.117N23F.060217T7 KL5B Nicotiana tabacum cDNA clone KL5B.117N23, mI        | 272.51  | 1 |
| gb EST_CSP008xf21f1.ab1 EST_CSP Nicotiana tabacum cDNA, mRNA sequence [EH         | 64.65   | 1 |
| gb KL4B.100P18F.050922T7 KL4B Nicotiana tabacum cDNA clone KL4B.100P18, mR        | 1477.32 | 1 |
| gb Nicotiana tabacum NtRSH1 mRNA for RelA-SpoT like protein RSH1, complete cd     | 95.1    | 1 |
| tc Rep: Actin-7 - Arabidopsis thaliana (Mouse-ear cress), complete [TC40665]      | 38.88   | 1 |
| Unknown                                                                           | 32.83   | 1 |
| Unknown                                                                           | 1009.25 | 1 |
| gb AGN_PNL228cf1_h4.trimmed.seq AGN_PNL Nicotiana tabacum cDNA 5', mRNA           | 197.27  | 1 |
| tc Rep: Chromosome chr18 scaffold_137, whole genome shotgun sequence - Vitis v    | 112.01  | 1 |
| tc Rep: Chromosome chr14 scaffold_54, whole genome shotgun sequence - Vitis vi    | 216.12  | 1 |
| tc Rep: F-box/Kelch-repeat protein At1g16250 - Arabidopsis thaliana (Mouse-ear cr | 30.36   | 1 |
| gb KF8C.105P23F.051215T7 KF8 Nicotiana tabacum cDNA clone KF8C.105P23, mRN        | 683.84  | 1 |

|                                                                                     |         |   |
|-------------------------------------------------------------------------------------|---------|---|
| gb AGN_PNL221df1_a10.trimmed.seq AGN_PNL Nicotiana tabacum cDNA 5', mRNA            | 4083.58 | 1 |
| tc Rep: Chromosome chr13 scaffold_17, whole genome shotgun sequence - Vitis vi      | 102.87  | 1 |
| Unknown                                                                             | 87.91   | 1 |
| tc Rep: Chromosome chr15 scaffold_40, whole genome shotgun sequence - Vitis vi      | 264.79  | 1 |
| gb KN6B.106I24F.060104T7 KN6B Nicotiana tabacum cDNA clone KN6B.106I24, mF          | 43.34   | 1 |
| tc Rep: Heat shock protein 90 - Nicotiana tabacum (Common tobacco), partial (16%    | 690.03  | 1 |
| gb Nicotiana tabacum mRNA for proliferating cell nuclear antigen [AJ012662]         | 35.43   | 1 |
| Unknown                                                                             | 111.92  | 1 |
| tc Rep: Beta 1,3-glycosyltransferase-like protein I - Solanum lycopersicum (Tomato  | 66.43   | 1 |
| tc Rep: Chromosome chr4 scaffold_6, whole genome shotgun sequence - Vitis vinif     | 531.93  | 1 |
| tc Rep: Tetratricoredoxin - Nicotiana tabacum (Common tobacco), complete [TC65      | 30.99   | 1 |
| tc Rep: Chromosome chr1 scaffold_5, whole genome shotgun sequence - Vitis vinif     | 116.1   | 1 |
| gb N.tabacum mRNA for heat shock protein 82 [X63195]                                | 732.74  | 1 |
| gb KL4B.106C04F.051125T7 KL4B Nicotiana tabacum cDNA clone KL4B.106C04, mR          | 41.84   | 1 |
| Unknown                                                                             | 21.68   | 1 |
| gb KG9B.002K18F.050720T7 KG9B Nicotiana tabacum cDNA clone KG9B.002K18, m           | 32.67   | 1 |
| tc Rep: AT4g37280/C7A10_80 - Arabidopsis thaliana (Mouse-ear cress), partial (84%   | 108.26  | 1 |
| gb AGN_RPC014xh01f1.ab1 AGN_RPC Nicotiana tabacum cDNA 5', mRNA sequenc             | 946.95  | 1 |
| gb BP532651 MAT005 Nicotiana tabacum cDNA clone BY28076, mRNA sequence [E           | 26.84   | 1 |
| tc Rep: Alkaline alpha-galactosidase seed imbibition protein - Solanum lycopersicur | 1292.07 | 1 |
| Unknown                                                                             | 351.76  | 1 |
| Unknown                                                                             | 369.25  | 1 |
| tc Rep: NADH dehydrogenase - Solanum tuberosum (Potato), partial (58%) [TC6165      | 134.79  | 1 |
| gb KP1B.110A01F.050727T7 KP1B Nicotiana tabacum cDNA clone KP1B.110A01, m           | 16.88   | 1 |
| tc Rep: At4g27040 - Arabidopsis thaliana (Mouse-ear cress), complete [TC56578]      | 100.98  | 1 |
| gb KN6B.104G12F.060103T7 KN6B Nicotiana tabacum cDNA clone KN6B.104G12, n           | 184.84  | 1 |
| tc Rep: Glycolate oxidase - Mesembryanthemum crystallinum (Common ice plant),       | 53.18   | 1 |
| gb TT-05_L10 Samsun trichome library Nicotiana tabacum cDNA, mRNA sequence [        | 97.12   | 1 |
| gb KR3B.114K17F.060119T7 KR3B Nicotiana tabacum cDNA clone KR3B.114K17, mI          | 18.35   | 1 |
| Unknown                                                                             | 3802.08 | 1 |
| Unknown                                                                             | 387.24  | 1 |
| gb KT7C.102L13F.051216T7 KT7 Nicotiana tabacum cDNA clone KT7C.102L13, mRN          | 27.91   | 1 |
| tc Rep: COP1 homolog - Solanum lycopersicum (Tomato) (Lycopersicon esculenturr      | 40.94   | 1 |
| tc Rep: Alpha-soluble NSF attachment protein - Solanum tuberosum (Potato), parti    | 1683.31 | 1 |

|                                                                                      |         |   |
|--------------------------------------------------------------------------------------|---------|---|
| Unknown                                                                              | 29.07   | 1 |
| gb N.tabacum mRNA for citrate synthase [X84226]                                      | 7860.2  | 1 |
| gb KP1B.102O09F.050722T7 KP1B Nicotiana tabacum cDNA clone KP1B.102O09, m            | 470.02  | 1 |
| Unknown                                                                              | 28.81   | 1 |
| gb KG9B.106L14F.051129T7 KG9B Nicotiana tabacum cDNA clone KG9B.106L14, m            | 47.65   | 1 |
| gb Nicotiana tabacum adenosine kinase isoform 2S mRNA, complete cds [AY69505.        | 8804.38 | 1 |
| gb TT-29_I03 Samsun trichome library Nicotiana tabacum cDNA, mRNA sequence [         | 190.01  | 1 |
| gb CHO_SL006xm14f1.ab1 CHO_SL Nicotiana tabacum cDNA, mRNA sequence [EH6             | 609.15  | 1 |
| Unknown                                                                              | 1254.77 | 1 |
| tc Rep: Cytochrome P450 - Nicotiana tabacum (Common tobacco), complete [TC45         | 26.57   | 1 |
| gb 16E01 Transformed tobacco Lambda Zap II library Nicotiana tabacum cDNA 5', n      | 582.46  | 1 |
| tc Rep: Chromosome chr3 scaffold_8, whole genome shotgun sequence - Vitis vinif      | 51.82   | 1 |
| gb KF8C.103L11F.051214T7 KF8 Nicotiana tabacum cDNA clone KF8C.103L11, mRN           | 27.72   | 1 |
| tc Rep: Chromosome chr19 scaffold_4, whole genome shotgun sequence - Vitis vin       | 26.67   | 1 |
| Unknown                                                                              | 267.74  | 1 |
| gb TT-01_C06 K326 late senescent leaf library Nicotiana tabacum cDNA, mRNA seq       | 55.53   | 1 |
| tc Rep: Phosphate translocator precursor - Nicotiana tabacum (Common tobacco),       | 38.94   | 1 |
| tc Rep: Chromosome chr18 scaffold_1, whole genome shotgun sequence - Vitis vin       | 3652.05 | 1 |
| tc Rep: Protein translation factor SUI1 homolog - Sporobolus stapfianus (Ressurrecti | 3014.66 | 1 |
| gb TT-38_F10 tobacco leaf library Nicotiana tabacum cDNA, mRNA sequence [FG63        | 24.41   | 1 |
| gb AGN_ELP008xj24f1.ab1 AGN_ELP Nicotiana tabacum cDNA 5', mRNA sequence             | 21.83   | 1 |
| Unknown                                                                              | 452.24  | 1 |
| gb CHO_SL008xp13f1.ab1 CHO_SL Nicotiana tabacum cDNA, mRNA sequence [EH6             | 512.33  | 1 |
| gb KR3B.106J18F.051109T7 KR3B Nicotiana tabacum cDNA clone KR3B.106J18, mR           | 159.09  | 1 |
| tc Rep: Chromosome chr7 scaffold_192, whole genome shotgun sequence - Vitis vi       | 116.43  | 1 |
| tc Rep: NAD-malate dehydrogenase precursor - Nicotiana tabacum (Common toba          | 5771.32 | 1 |
| tc Rep: Chromosome chr2 scaffold_187, whole genome shotgun sequence - Vitis vi       | 28.34   | 1 |
| gb TOBESTR055B09 TOBEST cDNA library 1 Nicotiana tabacum cDNA 5', mRNA seqi          | 24.34   | 1 |
| gb KL4B.104O03F.051104T7 KL4B Nicotiana tabacum cDNA clone KL4B.104O03, mf           | 31.71   | 1 |
| gb TT-18_N11 tobacco leaf library Nicotiana tabacum cDNA, mRNA sequence [FG6:        | 60.37   | 1 |
| tc Rep: EIN3-binding F-box protein 2 - Solanum lycopersicum (Tomato) (Lycopersicc    | 965.41  | 1 |
| gb FS411114 normalized full-length tobacco cDNA library Nicotiana tabacum cDNA       | 24.13   | 1 |
| tc Rep: Secretory carrier-associated membrane protein 3 - Arabidopsis thaliana (M    | 374.55  | 1 |
| Unknown                                                                              | 135.28  | 1 |

|                                                                                     |         |   |
|-------------------------------------------------------------------------------------|---------|---|
| gb Nicotiana tabacum GDP dissociation inhibitor (GDI) mRNA, complete cds [AF012     | 5334.27 | 1 |
| tc Rep: Chromosome chr17 scaffold_12, whole genome shotgun sequence - Vitis vi      | 409.8   | 1 |
| tc Rep: At1g19680 - Arabidopsis thaliana (Mouse-ear cress), partial (17%) [TC60167  | 959.09  | 1 |
| Unknown                                                                             | 1118.33 | 1 |
| Unknown                                                                             | 3383.81 | 1 |
| gb AGN_RNC010xh16f1.ab1 AGN_RNC Nicotiana tabacum cDNA 5', mRNA sequenc             | 18.3    | 1 |
| Unknown                                                                             | 626.43  | 1 |
| gb TT-09_E17 K326 late senescent leaf library Nicotiana tabacum cDNA, mRNA seq      | 100.09  | 1 |
| gb KG9B.002N07F.050720T7 KG9B Nicotiana tabacum cDNA clone KG9B.002N07, n           | 3785.57 | 1 |
| Unknown                                                                             | 40.11   | 1 |
| tc Rep: Chromosome chr5 scaffold_64, whole genome shotgun sequence - Vitis vin      | 32.64   | 1 |
| gb AGN_RNC023xk20f1.ab1 AGN_RNC Nicotiana tabacum cDNA 5', mRNA sequenc             | 18.95   | 1 |
| tc Rep: SM10 - Nicotiana tabacum (Common tobacco), complete [TC40181]               | 78.31   | 1 |
| gb AGN_PNL210ar1_b6.trimmed.seq AGN_PNL Nicotiana tabacum cDNA 3', mRNA             | 23.56   | 1 |
| tc Rep: Chromosome chr6 scaffold_25, whole genome shotgun sequence - Vitis vin      | 104.47  | 1 |
| gb TT-23_E13 Burley21 trichome library Nicotiana tabacum cDNA, mRNA sequence        | 1134.02 | 1 |
| gb KT7B.107O10F.060124T7 KT7 Nicotiana tabacum cDNA clone KT7B.107O10, mR           | 60.25   | 1 |
| tc Rep: Chromosome chr8 scaffold_29, whole genome shotgun sequence - Vitis vin      | 1489.5  | 1 |
| gb KF8C.101C08F.051214T7 KF8 Nicotiana tabacum cDNA clone KF8C.101C08, mRN          | 399.51  | 1 |
| tc Rep: Mitochondrial prohibitin 1 - Petunia hybrida (Petunia), complete [TC47520]  | 20.95   | 1 |
| gb TT-10_E12 K326 late senescent leaf library Nicotiana tabacum cDNA, mRNA seq      | 35.39   | 1 |
| Unknown                                                                             | 783.97  | 1 |
| Unknown                                                                             | 60.85   | 1 |
| gb KN6B.107P11F.060106T7 KN6B Nicotiana tabacum cDNA clone KN6B.107P11, nr          | 24.96   | 1 |
| tc Rep: Transcription factor MYB48 - Arabidopsis thaliana (Mouse-ear cress), partia | 26.04   | 1 |
| Unknown                                                                             | 51.52   | 1 |
| tc Rep: Chromosome chr10 scaffold_81, whole genome shotgun sequence - Vitis vi      | 433.47  | 1 |
| gb TT-06_J15 Samsun trichome library Nicotiana tabacum cDNA, mRNA sequence [        | 189.7   | 1 |
| gb N.tabacum mRNA for citrate synthase [X84226]                                     | 1210.75 | 1 |
| gb TL13.109H18F.060320T7 TL13 Nicotiana tabacum cDNA clone TL13.109H18, mR          | 7224.52 | 1 |
| gb KF8C.104B19F.051214T7 KF8 Nicotiana tabacum cDNA clone KF8C.104B19, mRN          | 29.37   | 1 |
| gb TT-14_P19 K326 late senescent leaf library Nicotiana tabacum cDNA, mRNA seq      | 497.8   | 1 |
| tc Rep: Chromosome chr1 scaffold_46, whole genome shotgun sequence - Vitis vin      | 50.87   | 1 |
| tc Rep: Ribulose-5-phosphate-3-epimerase - Pisum sativum (Garden pea), partial (9   | 26.53   | 1 |

|                                                                                                         |         |   |
|---------------------------------------------------------------------------------------------------------|---------|---|
| gb TT-50_B23 Samsun trichome library Nicotiana tabacum cDNA, mRNA sequence                              | 57.2    | 1 |
| gb AM839082 seedling library, SL Nicotiana tabacum cDNA clone nt002152044, mRNA sequence                | 89.77   | 1 |
| Unknown                                                                                                 | 1130.66 | 1 |
| gb Nicotiana tabacum osmotic stress-activated protein kinase (OSAK) mRNA, complete cds                  | 27.69   | 1 |
| tc Rep: Chromosome chr17 scaffold_101, whole genome shotgun sequence - Vitis vinifera                   | 18.48   | 1 |
| tc Rep: Brassinosteroid insensitive 1 - Nicotiana tabacum (Common tobacco), partial cds                 | 44.25   | 1 |
| gb TT-05_D07 tobacco leaf library Nicotiana tabacum cDNA, mRNA sequence [FG6:1000000000]                | 240.78  | 1 |
| tc Rep: RanBP2-type zinc finger protein At1g67325 - Arabidopsis thaliana (Mouse-ear cress), partial cds | 261.37  | 1 |
| tc Rep: Eukaryotic translation initiation factor 5A-4 - Solanum lycopersicum (Tomato), partial cds      | 2403.76 | 1 |
| Unknown                                                                                                 | 401.03  | 1 |
| gb TT-36_M06 Burley21 trichome library Nicotiana tabacum cDNA, mRNA sequence                            | 33.69   | 1 |
| gb EST_FLW002xd23f1.ab1 EST_FLW Nicotiana tabacum cDNA, mRNA sequence [EFLW002xd23f1]                   | 110.03  | 1 |
| gb AM824464 DL, diurnal library Nicotiana tabacum cDNA clone nt005080040, mRNA sequence                 | 91.51   | 1 |
| gb AGN_ELP011xe21f1.ab1 AGN_ELP Nicotiana tabacum cDNA 5', mRNA sequence                                | 107.57  | 1 |
| gb AGN_PNL220af1_b11.trimmed.seq AGN_PNL Nicotiana tabacum cDNA 5', mRNA sequence                       | 19.68   | 1 |
| gb AGN_RNC211xf09f1.ab1 AGN_RNC Nicotiana tabacum cDNA 5', mRNA sequence                                | 466.3   | 1 |
| tc Rep: Vacuolar proton pump subunit F - Corchorus olitorius, complete [TC69780]                        | 1436.56 | 1 |
| tc Rep: Chromosome chr7 scaffold_42, whole genome shotgun sequence - Vitis vinifera                     | 25.92   | 1 |
| Unknown                                                                                                 | 32.25   | 1 |
| Unknown                                                                                                 | 31.65   | 1 |
| Unknown                                                                                                 | 130.55  | 1 |
| tc Rep: AT3g47831/T23J7 - Arabidopsis thaliana (Mouse-ear cress), partial (89%) [T23J7]                 | 72.87   | 1 |
| gb KL4B.113C19F.060131T7 KL4B Nicotiana tabacum cDNA clone KL4B.113C19, mRNA sequence                   | 516.57  | 1 |
| Unknown                                                                                                 | 19.36   | 1 |
| tc Rep: Chromosome chr5 scaffold_2, whole genome shotgun sequence - Vitis vinifera                      | 7505.29 | 1 |
| tc Rep: Ribosomal protein S27 - Vitis vinifera (Grape), complete [TC58062]                              | 34.16   | 1 |
| tc Rep: Chromosome chr16 scaffold_86, whole genome shotgun sequence - Vitis vinifera                    | 3463.14 | 1 |
| Unknown                                                                                                 | 1109.51 | 1 |
| gb KT7C.108N18F.051219T7 KT7 Nicotiana tabacum cDNA clone KT7C.108N18, mRNA sequence                    | 34.07   | 1 |
| tc Rep: SKP1 - Nicotiana tabacum (Common tobacco), complete [TC48833]                                   | 5242.52 | 1 |
| Unknown                                                                                                 | 1055.58 | 1 |
| Unknown                                                                                                 | 75.3    | 1 |
| gb AGN_RNC018xk12f1.ab1 AGN_RNC Nicotiana tabacum cDNA 5', mRNA sequence                                | 43.48   | 1 |
| Unknown                                                                                                 | 4417.18 | 1 |

|                                                                                      |         |   |
|--------------------------------------------------------------------------------------|---------|---|
| Unknown                                                                              | 243.71  | 1 |
| gb AGN_ELP005xk12f1.ab1 AGN_ELP Nicotiana tabacum cDNA 5', mRNA sequence             | 23.58   | 1 |
| Unknown                                                                              | 58.44   | 1 |
| gb TOBESTR089A07 TOBEST cDNA library 1 Nicotiana tabacum cDNA 5', mRNA seq           | 20.97   | 1 |
| gb TT-18_N12 Samsun trichome library Nicotiana tabacum cDNA, mRNA sequence           | 519.68  | 1 |
| gb AM789543 seedling library, SL Nicotiana tabacum cDNA clone nt002101067, mF        | 18.07   | 1 |
| tc Rep: Metallothionein-like protein type 2 - Nicotiana plumbaginifolia (Leadwort-lk | 1526.79 | 1 |
| tc Rep: H+-transporting two-sector ATPase, C (AC39) subunit - Medicago truncatula    | 4573.07 | 1 |
| gb N.tabacum eIF-4A8 mRNA [X79004]                                                   | 516.29  | 1 |
| tc Rep: Pm27 protein - Prunus mume (Japanese flowering apricot), partial (57%) [T    | 1251.21 | 1 |
| Unknown                                                                              | 25.78   | 1 |
| tc Rep: Molecular chaperone Hsp90-2 - Nicotiana benthamiana, partial (28%) [TC4z     | 2663.5  | 1 |
| gb KT7B.100E11F.051010T7 KT7 Nicotiana tabacum cDNA clone KT7B.100E11, mRN           | 1043.92 | 1 |
| gb KF8C.102F08F.051214T7 KF8 Nicotiana tabacum cDNA clone KF8C.102F08, mRN           | 445.6   | 1 |
| gb BL12.103K16F.060309T7 BL12 Nicotiana tabacum cDNA clone BL12.103K16, mR           | 372.62  | 1 |
| tc Rep: Chromosome chr8 scaffold_34, whole genome shotgun sequence - Vitis vin       | 87.17   | 1 |
| tc Rep: Peptidyl-prolyl cis-trans isomerase - Solanum lycopersicum (Tomato) (Lycop   | 539.38  | 1 |
| tc Rep: Malate dehydrogenase, glyoxysomal precursor - Citrullus lanatus (Waterme     | 314.47  | 1 |
| tc Rep: STYLOSA protein - Antirrhinum majus (Garden snapdragon), partial (29%) [T    | 42.42   | 1 |
| Unknown                                                                              | 111.78  | 1 |
| tc Rep: RRM-containing RNA-binding protein-like protein - Solanum tuberosum (Po      | 68.08   | 1 |
| tc Rep: Chromosome chr10 scaffold_433, whole genome shotgun sequence - Vitis v       | 28.28   | 1 |
| Unknown                                                                              | 85.03   | 1 |
| gb 1H08 Transformed tobacco Lambda Zap II library Nicotiana tabacum cDNA 5', m       | 81.66   | 1 |
| Unknown                                                                              | 798.61  | 1 |
| Unknown                                                                              | 2802.64 | 1 |
| Unknown                                                                              | 957.35  | 1 |
| gb KL4B.113L02F.060131T7 KL4B Nicotiana tabacum cDNA clone KL4B.113L02, mRI          | 25.71   | 1 |
| gb KF8C.102B08F.051214T7 KF8 Nicotiana tabacum cDNA clone KF8C.102B08, mRN           | 26.61   | 1 |
| gb KR2B.112E09F.051230T7 KR2B Nicotiana tabacum cDNA clone KR2B.112E09, mI           | 32.19   | 1 |
| tc Rep: Chromosome undetermined scaffold_52, whole genome shotgun sequence           | 23.84   | 1 |
| gb AM834148 seedling library, SL Nicotiana tabacum cDNA clone nt002270045, mF        | 41.93   | 1 |
| Unknown                                                                              | 220.03  | 1 |
| gb AGN_ELP002xf10f1.ab1 AGN_ELP Nicotiana tabacum cDNA 5', mRNA sequence             | 27.18   | 1 |



|                                                                                      |         |   |
|--------------------------------------------------------------------------------------|---------|---|
| Unknown                                                                              | 273.06  | 1 |
| tc Rep: Chromosome chr4 scaffold_443, whole genome shotgun sequence - Vitis vi       | 389.75  | 1 |
| Unknown                                                                              | 141.6   | 1 |
| Unknown                                                                              | 121.43  | 1 |
| gb TT-07_H09 tobacco leaf library Nicotiana tabacum cDNA, mRNA sequence [FG6:        | 61.11   | 1 |
| gb CHO_SL025xf17f1.ab1 CHO_SL Nicotiana tabacum cDNA, mRNA sequence [EH6:            | 389.63  | 1 |
| gb KG9B.104E17F.060120T7 KG9B Nicotiana tabacum cDNA clone KG9B.104E17, m            | 53.52   | 1 |
| Unknown                                                                              | 29.71   | 1 |
| tc Rep: OJ000223_09.9 protein - Oryza sativa subsp. japonica (Rice), partial (93%) [ | 114.55  | 1 |
| tc Rep: Chromosome chr4 scaffold_6, whole genome shotgun sequence - Vitis vinif      | 940.78  | 1 |
| gb KF8C.103M05F.051214T7 KF8 Nicotiana tabacum cDNA clone KF8C.103M05, mF            | 517.04  | 1 |
| Unknown                                                                              | 77.3    | 1 |
| Unknown                                                                              | 83.62   | 1 |
| Unknown                                                                              | 85.89   | 1 |
| Unknown                                                                              | 18.09   | 1 |
| gb Nicotiana tabacum DNA-directed RNA polymerase IIb (NT193) mRNA, complete          | 19.09   | 1 |
| gb KT7C.104N15F.051219T7 KT7 Nicotiana tabacum cDNA clone KT7C.104N15, mR            | 32.1    | 1 |
| gb CHO_SL012xd21f1.ab1 CHO_SL Nicotiana tabacum cDNA, mRNA sequence [EH6             | 24.41   | 1 |
| gb TT-19_O16 K326 early senescent leaf library Nicotiana tabacum cDNA, mRNA se       | 108.54  | 1 |
| gb KP1B.112G11F.060117T7 KP1B Nicotiana tabacum cDNA clone KP1B.112G11, m            | 40.37   | 1 |
| Unknown                                                                              | 196.99  | 1 |
| Unknown                                                                              | 20.29   | 1 |
| gb KP1B.108I18F.050726T7 KP1B Nicotiana tabacum cDNA clone KP1B.108I18, mRI          | 44.51   | 1 |
| gb AGN_ELP008xp13f1.ab1 AGN_ELP Nicotiana tabacum cDNA 5', mRNA sequence             | 29.31   | 1 |
| Unknown                                                                              | 22.14   | 1 |
| gb KG9B.104O15F.060120T7 KG9B Nicotiana tabacum cDNA clone KG9B.104O15, r            | 1080.45 | 1 |
| tc Rep: Chromosome chr18 scaffold_1, whole genome shotgun sequence - Vitis vin       | 63.21   | 1 |
| gb BL12.103H14F.060309T7 BL12 Nicotiana tabacum cDNA clone BL12.103H14, mF           | 25.88   | 1 |
| tc Rep: Chromosome chr8 scaffold_23, whole genome shotgun sequence - Vitis vin       | 28.75   | 1 |
| gb CHO_SL023xf22f1.ab1 CHO_SL Nicotiana tabacum cDNA, mRNA sequence [EH6:            | 591.22  | 1 |
| tc Rep: Syntaxin-52 - Arabidopsis thaliana (Mouse-ear cress), complete [TC40892]     | 112.1   | 1 |
| tc Rep: RAN GTPase-activating protein 2 - Nicotiana benthamiana, complete [TC49:     | 80.29   | 1 |
| gb KG9B.004M17F.050721T7 KG9B Nicotiana tabacum cDNA clone KG9B.004M17,              | 132.34  | 1 |
| gb Nicotiana tabacum elongation factor 1-alpha mRNA, complete cds [AF120093]         | 1521.12 | 1 |

|                                                                                    |          |   |
|------------------------------------------------------------------------------------|----------|---|
| Unknown                                                                            | 210.48   | 1 |
| tc Rep: Serine hydroxymethyltransferase, mitochondrial precursor - Solanum tuber   | 3167.09  | 1 |
| Unknown                                                                            | 40.7     | 1 |
| Unknown                                                                            | 151.73   | 1 |
| tc Rep: Chromosome undetermined scaffold_143, whole genome shotgun sequenc         | 72.32    | 1 |
| tc Rep: Heat shock protein HslU - Chlorobium phaeobacteroides BS1, partial (4%) [1 | 60.46    | 1 |
| tc Rep: Chromosome chr14 scaffold_27, whole genome shotgun sequence - Vitis vi     | 663.18   | 1 |
| gb KP1B.108I18F.050726T7 KP1B Nicotiana tabacum cDNA clone KP1B.108I18, mRI        | 48.23    | 1 |
| tc Rep: Transmembrane protein C1orf215 - Homo sapiens (Human), partial (5%) [TC    | 52.41    | 1 |
| Unknown                                                                            | 30.47    | 1 |
| gb Nicotiana tabacum cDNA-AFLP-fragment BSTC1-32-250, cultivar Bright Yellow 2     | 25.91    | 1 |
| tc Rep: Chromosome chr4 scaffold_32, whole genome shotgun sequence - Vitis vin     | 42.98    | 1 |
| gb AGN_ELP024xn09f1.ab1 AGN_ELP Nicotiana tabacum cDNA 5', mRNA sequence           | 67.15    | 1 |
| tc Rep: Chromosome chr8 scaffold_106, whole genome shotgun sequence - Vitis vi     | 981.44   | 1 |
| tc Rep: Histone H2B - Nicotiana tabacum (Common tobacco), complete [TC55592]       | 32.59    | 1 |
| gb KP1B.107H16F.050726T7 KP1B Nicotiana tabacum cDNA clone KP1B.107H16, m          | 856.42   | 1 |
| tc Rep: Chromosome chr4 scaffold_39, whole genome shotgun sequence - Vitis vin     | 2854.23  | 1 |
| Unknown                                                                            | 44.2     | 1 |
| tc Rep: DELLA protein GA11 - Vitis vinifera (Grape), partial (78%) [TC48661]       | 94.1     | 1 |
| gb FS413389 normalized full-length tobacco cDNA library Nicotiana tabacum cDNA     | 128.67   | 1 |
| gb TT-18_I12 Samsun trichome library Nicotiana tabacum cDNA, mRNA sequence [       | 33.04    | 1 |
| Unknown                                                                            | 474.22   | 1 |
| gb KG9B.104C04F.060120T7 KG9B Nicotiana tabacum cDNA clone KG9B.104C04, m          | 966.2    | 1 |
| tc Rep: SAT5 - Pisum sativum (Garden pea), partial (70%) [TC41109]                 | 191.95   | 1 |
| Unknown                                                                            | 1190.74  | 1 |
| tc Rep: Chromosome chr10 scaffold_76, whole genome shotgun sequence - Vitis vi     | 10743.35 | 1 |
| Unknown                                                                            | 260.11   | 1 |
| tc Rep: Chromosome chr6 scaffold_3, whole genome shotgun sequence - Vitis vinif    | 560.41   | 1 |
| gb KR3B.110J03F.051111T7 KR3B Nicotiana tabacum cDNA clone KR3B.110J03, mR         | 21.1     | 1 |
| tc Rep: Chromosome chr2 scaffold_112, whole genome shotgun sequence - Vitis vi     | 17.87    | 1 |
| gb KN6B.105F14F.060104T7 KN6B Nicotiana tabacum cDNA clone KN6B.105F14, m          | 80.19    | 1 |
| tc Rep: SEU1 protein - Antirrhinum majus (Garden snapdragon), partial (13%) [TC62  | 277.16   | 1 |
| Unknown                                                                            | 24.39    | 1 |
| gb CHO_SL013xk10f1.ab1 CHO_SL Nicotiana tabacum cDNA, mRNA sequence [EH6           | 377.25   | 1 |

|                                                                                       |          |   |
|---------------------------------------------------------------------------------------|----------|---|
| Unknown                                                                               | 2296.51  | 1 |
| tc Rep: Chromosome undetermined scaffold_114, whole genome shotgun sequenc            | 32.18    | 1 |
| Unknown                                                                               | 621.65   | 1 |
| gb KR3B.107I24F.051110T7 KR3B Nicotiana tabacum cDNA clone KR3B.107I24, mRI           | 133.84   | 1 |
| tc Rep: Chromosome chr9 scaffold_49, whole genome shotgun sequence - Vitis vin        | 101.05   | 1 |
| tc Rep: Chromosome undetermined scaffold_155, whole genome shotgun sequenc            | 80.57    | 1 |
| gb KF8B.100B17F.051010T7 KF8 Nicotiana tabacum cDNA clone KF8B.100B17, mRN            | 39955.75 | 1 |
| gb KL5B.106A09F.060215T7 KL5B Nicotiana tabacum cDNA clone KL5B.106A09, mF            | 28.87    | 1 |
| Unknown                                                                               | 89.42    | 1 |
| gb AGN_PNL210df1_b3.trimmed.seq AGN_PNL Nicotiana tabacum cDNA 5', mRNA               | 1179.71  | 1 |
| Unknown                                                                               | 25.82    | 1 |
| Unknown                                                                               | 26.21    | 1 |
| Unknown                                                                               | 1654.23  | 1 |
| Unknown                                                                               | 66.65    | 1 |
| gb AGN_ELP017xe10f1.ab1 AGN_ELP Nicotiana tabacum cDNA 5', mRNA sequence              | 21.93    | 1 |
| tc Rep: Proteasome subunit alpha type - Solanum tuberosum (Potato), complete [T       | 31.54    | 1 |
| gb KT7C.102N18F.051216T7 KT7 Nicotiana tabacum cDNA clone KT7C.102N18, mR             | 6532.99  | 1 |
| gb KG9B.002J07F.050720T7 KG9B Nicotiana tabacum cDNA clone KG9B.002J07, mF            | 182.33   | 1 |
| tc Rep: Phosphoglycerate kinase, chloroplast precursor - Nicotiana tabacum (Comn      | 217.59   | 1 |
| gb KG9B.103I06F.051128T7 KG9B Nicotiana tabacum cDNA clone KG9B.103I06, mR            | 518.74   | 1 |
| tc Rep: Chromosome chr18 scaffold_59, whole genome shotgun sequence - Vitis vi        | 57.85    | 1 |
| Unknown                                                                               | 25.31    | 1 |
| gb KR2B.111K11F.060128T7 KR2B Nicotiana tabacum cDNA clone KR2B.111K11, mI            | 27.71    | 1 |
| tc Rep: Chromosome undetermined scaffold_1573, whole genome shotgun sequen            | 644.67   | 1 |
| tc Rep: Os05g0119300 protein - Oryza sativa subsp. japonica (Rice), partial (41%) [T  | 101.05   | 1 |
| Unknown                                                                               | 3004.18  | 1 |
| gb KP1B.001I20F.050628T7 KP1B Nicotiana tabacum cDNA clone KP1B.001I20, mRI           | 22.88    | 1 |
| Unknown                                                                               | 931.65   | 1 |
| tc Rep: Chromosome chr4 scaffold_32, whole genome shotgun sequence - Vitis vin        | 48.88    | 1 |
| gb KP1B.001J23F.050628T7 KP1B Nicotiana tabacum cDNA clone KP1B.001J23, mR            | 641.58   | 1 |
| gb KF8B.100P17F.051010T7 KF8 Nicotiana tabacum cDNA clone KF8B.100P17, mRN            | 511.35   | 1 |
| tc Rep: Chromosome chr14 scaffold_211, whole genome shotgun sequence - Vitis v        | 182.43   | 1 |
| tc Rep: Protein arginine N-methyltransferase 5 - Oryza sativa subsp. indica (Rice), p | 23.66    | 1 |
| tc Rep: Expressed protein - Arabidopsis thaliana (Mouse-ear cress), partial (48%) [T  | 43.1     | 1 |

|                                                                                         |         |   |
|-----------------------------------------------------------------------------------------|---------|---|
| Unknown                                                                                 | 421.51  | 1 |
| tc Rep: S-adenosylmethionine decarboxylase - Prunus persica (Peach), partial (45%)      | 7605.18 | 1 |
| Unknown                                                                                 | 78.62   | 1 |
| gb AGN_RNC117xI06f1.ab1 AGN_RNC Nicotiana tabacum cDNA 5', mRNA sequence                | 98.72   | 1 |
| Unknown                                                                                 | 520.11  | 1 |
| tc Rep: Chromosome chr4 scaffold_6, whole genome shotgun sequence - Vitis vinifera      | 1575.75 | 1 |
| tc Rep: Methylenetetrahydrofolate reductase - Vitis vinifera (Grape), partial (61%)     | 206.72  | 1 |
| tc Rep: Phosphatidylinositol transfer-like protein III - Lotus japonicus, partial (59%) | 182.59  | 1 |
| Unknown                                                                                 | 2213.34 | 1 |
| gb KR2B.115M23F.051230T7 KR2B Nicotiana tabacum cDNA clone KR2B.115M23, mRNA            | 59.93   | 1 |
| Unknown                                                                                 | 19.86   | 1 |
| gb KF8C.103O13F.051214T7 KF8 Nicotiana tabacum cDNA clone KF8C.103O13, mRNA             | 9146.88 | 1 |
| tc Rep: Chromosome chr2 scaffold_11, whole genome shotgun sequence - Vitis vinifera     | 62.31   | 1 |
| gb KF8C.105N02F.051215T7 KF8 Nicotiana tabacum cDNA clone KF8C.105N02, mRNA             | 47.7    | 1 |
| gb Nicotiana tabacum salicylic acid-activated MAP kinase (NtSIPK) mRNA, complete        | 1609.6  | 1 |
| tc Rep: Chromosome chr5 scaffold_2, whole genome shotgun sequence - Vitis vinifera      | 299.94  | 1 |
| Unknown                                                                                 | 41.45   | 1 |
| tc Rep: Chromosome chr3 scaffold_8, whole genome shotgun sequence - Vitis vinifera      | 249.91  | 1 |
| tc Rep: 14-3-3 i-2 protein - Nicotiana tabacum (Common tobacco), partial (39%) [Tc]     | 88.84   | 1 |
| tc Rep: Chromosome chr14 scaffold_9, whole genome shotgun sequence - Vitis vinifera     | 9671.26 | 1 |
| gb KL4B.101G15F.051103T7 KL4B Nicotiana tabacum cDNA clone KL4B.101G15, mRNA            | 99.47   | 1 |
| Unknown                                                                                 | 29.55   | 1 |
| gb KT7C.104J03F.051219T7 KT7 Nicotiana tabacum cDNA clone KT7C.104J03, mRNA             | 124.24  | 1 |
| gb KP1B.101J07F.050722T7 KP1B Nicotiana tabacum cDNA clone KP1B.101J07, mRNA            | 547.69  | 1 |
| Unknown                                                                                 | 28.38   | 1 |
| tc Rep: F-box protein At1g47340 - Arabidopsis thaliana (Mouse-ear cress), partial (85%) | 46.62   | 1 |
| Unknown                                                                                 | 138.53  | 1 |
| tc Rep: Chromosome chr17 scaffold_12, whole genome shotgun sequence - Vitis vinifera    | 564.28  | 1 |
| Unknown                                                                                 | 253.43  | 1 |
| tc Rep: PII-like protein - Solanum lycopersicum (Tomato) (Lycopersicon esculentum)      | 26.98   | 1 |
| tc Rep: Chromosome chr8 scaffold_106, whole genome shotgun sequence - Vitis vinifera    | 106.7   | 1 |
| tc Rep: Chromosome chr5 scaffold_2, whole genome shotgun sequence - Vitis vinifera      | 92.31   | 1 |
| Unknown                                                                                 | 37.41   | 1 |
| Unknown                                                                                 | 85.99   | 1 |

|                                                                                                  |         |   |
|--------------------------------------------------------------------------------------------------|---------|---|
| tc Rep: Plastidic ATP/ADP-transporter - Solanum tuberosum (Potato), partial (56%)                | 26.29   | 1 |
| Unknown                                                                                          | 152.41  | 1 |
| tc Rep: Protein 108 precursor - Solanum lycopersicum (Tomato) (Lycopersicon esculentum)          | 19.29   | 1 |
| gb KR3B.106G17F.051109T7 KR3B Nicotiana tabacum cDNA clone KR3B.106G17, mRNA sequence [AY286000] | 297.36  | 1 |
| gb KP1B.101B02F.050722T7 KP1B Nicotiana tabacum cDNA clone KP1B.101B02, mRNA sequence [AF010000] | 250.26  | 1 |
| tc Rep: Chromosome chr17 scaffold_16, whole genome shotgun sequence - Vitis vinifera             | 197.18  | 1 |
| Unknown                                                                                          | 127.76  | 1 |
| tc Rep: ATP synthase subunit beta - Nicotiana glauca (Wood tobacco), partial (26%)               | 193.54  | 1 |
| gb Nicotiana tabacum callus-expressing factor (CEF1) mRNA, complete cds [AY286000]               | 21.7    | 1 |
| tc Rep: Chromosome undetermined scaffold_53, whole genome shotgun sequence - Vitis vinifera      | 179.35  | 1 |
| tc Rep: Ribosomal protein L41 - Candida maltosa (Yeast), complete [TC51829]                      | 34.05   | 1 |
| Unknown                                                                                          | 52.9    | 1 |
| tc Rep: Chromosome chr4 scaffold_32, whole genome shotgun sequence - Vitis vinifera              | 136.72  | 1 |
| Unknown                                                                                          | 43.34   | 1 |
| tc Rep: NADH-ubiquinone oxidoreductase subunit-like - Solanum tuberosum (Potato)                 | 1388.75 | 1 |
| gb CHO_SL005xe09f1.ab1 CHO_SL Nicotiana tabacum cDNA, mRNA sequence [EH622222]                   | 24.26   | 1 |
| Unknown                                                                                          | 134.25  | 1 |
| gb AGN_RNC001xf09f1.ab1 AGN_RNC Nicotiana tabacum cDNA 5', mRNA sequence [AF010000]              | 544.4   | 1 |
| tc Rep: DNA damage-binding protein 1 - Solanum cheesmanii (Galapagos island tobacco)             | 65.83   | 1 |
| Unknown                                                                                          | 2467.72 | 1 |
| gb TT-11_E13 K326 early senescent leaf library Nicotiana tabacum cDNA, mRNA sequence [AF010000]  | 127.42  | 1 |
| Unknown                                                                                          | 284     | 1 |
| gb CHO_SL008xj22f1.ab1 CHO_SL Nicotiana tabacum cDNA, mRNA sequence [EH622222]                   | 1264.82 | 1 |
| Unknown                                                                                          | 1192.73 | 1 |
| tc Rep: Chromosome chr3 scaffold_8, whole genome shotgun sequence - Vitis vinifera               | 516.67  | 1 |
| gb FS412805 normalized full-length tobacco cDNA library Nicotiana tabacum cDNA                   | 172.93  | 1 |
| tc Rep: Chorismate synthase 1, chloroplast precursor - Solanum lycopersicum (Tomato)             | 291.04  | 1 |
| tc Rep: Chromosome chr9 scaffold_7, whole genome shotgun sequence - Vitis vinifera               | 48.87   | 1 |
| tc Rep: 40S ribosomal protein S16 - Euphorbia esula (Leafy spurge), partial (97%) [T000000]      | 24.93   | 1 |
| gb TOBESTR026D08 TOBEST cDNA library 1 Nicotiana tabacum cDNA 5', mRNA sequence [AF010000]       | 687.54  | 1 |
| tc Rep: Histone deacetylase HDT1 - Solanum chacoense (Chaco potato), partial (85%)               | 161.81  | 1 |
| Unknown                                                                                          | 25.72   | 1 |
| Unknown                                                                                          | 20.83   | 1 |
| tc Rep: Protein kinase Ck2 regulatory subunit 2 - Nicotiana tabacum (Common tobacco)             | 171.55  | 1 |

|                                                                                     |         |   |
|-------------------------------------------------------------------------------------|---------|---|
| Unknown                                                                             | 20.39   | 1 |
| Unknown                                                                             | 82.47   | 1 |
| gb AM839972 seedling library, SL Nicotiana tabacum cDNA clone nt002240050, mF       | 50.13   | 1 |
| tc Rep: Probable pectate lyase P59 precursor - Solanum lycopersicum (Tomato) (Ly    | 53747   | 1 |
| gb AGN_RNC025xl24f1.ab1 AGN_RNC Nicotiana tabacum cDNA 5', mRNA sequenc             | 249.63  | 1 |
| tc Rep: Chromosome undetermined scaffold_141, whole genome shotgun sequenc          | 62.89   | 1 |
| gb AGN_ELP019xb18f1.ab1 AGN_ELP Nicotiana tabacum cDNA 5', mRNA sequence            | 169     | 1 |
| Unknown                                                                             | 2144.69 | 1 |
| Unknown                                                                             | 52.16   | 1 |
| gb KL4B.105B13F.051104T7 KL4B Nicotiana tabacum cDNA clone KL4B.105B13, mR          | 72.85   | 1 |
| tc Rep: Cytochrome c oxidase family protein-like - Solanum tuberosum (Potato), co   | 183.81  | 1 |
| tc Rep: Chromosome chr7 scaffold_44, whole genome shotgun sequence - Vitis vin      | 114.03  | 1 |
| tc Rep: K+-dependent Na+/Ca+ exchanger related-protein - Desulfovibrio desulfuric   | 28.56   | 1 |
| gb KP1B.110K12F.050727T7 KP1B Nicotiana tabacum cDNA clone KP1B.110K12, mF          | 38.37   | 1 |
| gb KL5B.104O21F.060207T7 KL5B Nicotiana tabacum cDNA clone KL5B.104O21, mF          | 61.44   | 1 |
| gb KL5B.001F15F.050901T7 KL5B Nicotiana tabacum cDNA clone KL5B.001F15, mR          | 2682.6  | 1 |
| tc Rep: Chromosome chr8 scaffold_34, whole genome shotgun sequence - Vitis vin      | 501.84  | 1 |
| tc Rep: Chromosome chr14 scaffold_21, whole genome shotgun sequence - Vitis vi      | 61.58   | 1 |
| Unknown                                                                             | 2406.12 | 1 |
| gb KF8C.102A13F.051214T7 KF8 Nicotiana tabacum cDNA clone KF8C.102A13, mR           | 74.83   | 1 |
| Unknown                                                                             | 50.39   | 1 |
| gb Nicotiana tabacum NKT1 mRNA for potassium channel NKT1, complete cds [AB1        | 75.61   | 1 |
| gb KG9B.101P02F.060120T7 KG9B Nicotiana tabacum cDNA clone KG9B.101P02, m           | 968.25  | 1 |
| tc Rep: Chromosome chr13 scaffold_17, whole genome shotgun sequence - Vitis vi      | 82.44   | 1 |
| gb KP1B.001L22F.050628T7 KP1B Nicotiana tabacum cDNA clone KP1B.001L22, mF          | 502.08  | 1 |
| Unknown                                                                             | 27.29   | 1 |
| tc Rep: Chromosome chr1 scaffold_180, whole genome shotgun sequence - Vitis vi      | 158.45  | 1 |
| tc Rep: Ubiquitin-conjugating enzyme family protein-like protein - Solanum tubero:  | 24.63   | 1 |
| Unknown                                                                             | 160.22  | 1 |
| tc Rep: Cytochrome c assembly protein - Nocardiooides sp. (strain BAA-499 / JS614), | 24.8    | 1 |
| gb KG9B.102N02F.051126T7 KG9B Nicotiana tabacum cDNA clone KG9B.102N02, n           | 795.76  | 1 |
| Unknown                                                                             | 43.91   | 1 |
| Unknown                                                                             | 832.03  | 1 |
| gb KG9B.103M10F.051128T7 KG9B Nicotiana tabacum cDNA clone KG9B.103M10,             | 3356.56 | 1 |

|                                                                                      |         |   |
|--------------------------------------------------------------------------------------|---------|---|
| tc Rep: Chromosome chr18 scaffold_24, whole genome shotgun sequence - Vitis vi       | 31.78   | 1 |
| tc Rep: Chromosome chr5 scaffold_2, whole genome shotgun sequence - Vitis vinif      | 57.26   | 1 |
| Unknown                                                                              | 205.04  | 1 |
| Unknown                                                                              | 32.37   | 1 |
| Unknown                                                                              | 624.96  | 1 |
| gb KG9B.105O08F.051128T7 KG9B Nicotiana tabacum cDNA clone KG9B.105O08, r            | 234.01  | 1 |
| gb KR2B.113A02F.060128T7 KR2B Nicotiana tabacum cDNA clone KR2B.113A02, m            | 5342.67 | 1 |
| gb Nicotiana tabacum TPK1 mRNA, complete cds [EU161633]                              | 256.6   | 1 |
| tc Rep: Expressed protein - Arabidopsis thaliana (Mouse-ear cress), partial (44%) [T | 509.72  | 1 |
| gb KR3B.109L19F.051111T7 KR3B Nicotiana tabacum cDNA clone KR3B.109L19, mF           | 43.89   | 1 |
| tc Rep: Ubiquitin carrier protein - Solanum tuberosum (Potato), partial (98%) [TC44  | 1296.24 | 1 |
| tc Rep: T25K16.8 - Arabidopsis thaliana (Mouse-ear cress), partial (22%) [TC46417]   | 479.29  | 1 |
| Unknown                                                                              | 26.5    | 1 |
| tc Rep: Mitochondrial phosphate transporter - Zea mays (Maize), partial (64%) [TC4   | 802.93  | 1 |
| tc Rep: Chromosome chr10 scaffold_81, whole genome shotgun sequence - Vitis vi       | 139.46  | 1 |
| tc Rep: Chromosome chr17 scaffold_12, whole genome shotgun sequence - Vitis vi       | 86.66   | 1 |
| tc Rep: Chromosome chr16 scaffold_189, whole genome shotgun sequence - Vitis v       | 107.47  | 1 |
| Unknown                                                                              | 7921.24 | 1 |
| gb CHO_SL028xj15f1.ab1 CHO_SL Nicotiana tabacum cDNA, mRNA sequence [EH62            | 90.03   | 1 |
| Unknown                                                                              | 32.07   | 1 |
| gb KR2B.109H17F.051229T7 KR2B Nicotiana tabacum cDNA clone KR2B.109H17, m            | 854.37  | 1 |
| gb AM788334 DL, diurnal library Nicotiana tabacum cDNA clone nt005251061, mRI        | 60.27   | 1 |
| tc Rep: Mitochondrial processing peptidase - Solanum tuberosum (Potato), partial (   | 169.4   | 1 |
| tc Rep: Cyc07 - Nicotiana tabacum (Common tobacco), partial (72%) [TC72415]          | 171.19  | 1 |
| gb KG9B.105B11F.051128T7 KG9B Nicotiana tabacum cDNA clone KG9B.105B11, r            | 72.31   | 1 |
| gb KF8C.103N20F.051214T7 KF8 Nicotiana tabacum cDNA clone KF8C.103N20, mRI           | 30.65   | 1 |
| gb CHO_SL007xc07f2.ab1 CHO_SL Nicotiana tabacum cDNA, mRNA sequence [EH6:            | 424.35  | 1 |
| tc Rep: Aspartate aminotransferase - Vitis vinifera (Grape), partial (47%) [TC45425] | 207.81  | 1 |
| Unknown                                                                              | 152.49  | 1 |
| gb Nicotiana tabacum sigA2 mRNA for sigma factor, complete cds [AB023572]            | 195.93  | 1 |
| gb AM799412 DL, diurnal library Nicotiana tabacum cDNA clone nt005141043, mRI        | 527.12  | 1 |
| gb TT-02_K02 Samsun trichome library Nicotiana tabacum cDNA, mRNA sequence           | 886.11  | 1 |
| gb AM786721 seedling library, SL Nicotiana tabacum cDNA clone nt002088073, mF        | 21.38   | 1 |
| tc Rep: Metacaspase type II - Nicotiana benthamiana, partial (74%) [TC42092]         | 40.93   | 1 |

|                                                                                     |         |   |
|-------------------------------------------------------------------------------------|---------|---|
| gb AGN_PNL205cf1_f7.trimmed.seq AGN_PNL Nicotiana tabacum cDNA 5', mRNA :           | 57.41   | 1 |
| tc Rep: ATP synthase subunit delta', mitochondrial precursor - Ipomoea batatas (Sv  | 143.28  | 1 |
| tc Rep: Chromosome chr16 scaffold_10, whole genome shotgun sequence - Vitis vi      | 82.35   | 1 |
| tc Rep: Chromosome chr12 scaffold_18, whole genome shotgun sequence - Vitis vi      | 1104.56 | 1 |
| gb TT-17_J16 K326 late senescent leaf library Nicotiana tabacum cDNA, mRNA sequ     | 517.56  | 1 |
| tc Rep: Chromosome undetermined scaffold_142, whole genome shotgun sequenc          | 189.88  | 1 |
| gb KR3B.101B05F.051107T7 KR3B Nicotiana tabacum cDNA clone KR3B.101B05, m           | 51.98   | 1 |
| tc Rep: Chromosome chr2 scaffold_11, whole genome shotgun sequence - Vitis vin      | 275.04  | 1 |
| gb Nicotiana tabacum unknown mRNA [EF051135]                                        | 27.23   | 1 |
| gb AGN_PNL203bf1_a10.trimmed.seq AGN_PNL Nicotiana tabacum cDNA 5', mRN,            | 34.95   | 1 |
| gb KF8C.102P04F.051214T7 KF8 Nicotiana tabacum cDNA clone KF8C.102P04, mRN          | 91.77   | 1 |
| Unknown                                                                             | 258.19  | 1 |
| tc Rep: Chromosome chr12 scaffold_36, whole genome shotgun sequence - Vitis vi      | 464.58  | 1 |
| Unknown                                                                             | 26.97   | 1 |
| Unknown                                                                             | 18.57   | 1 |
| gb KG9B.106K16F.051129T7 KG9B Nicotiana tabacum cDNA clone KG9B.106K16, m           | 25.1    | 1 |
| tc Rep: Chromosome undetermined scaffold_404, whole genome shotgun sequenc          | 230.52  | 1 |
| Unknown                                                                             | 125.7   | 1 |
| tc Rep: Chromosome chr10 scaffold_138, whole genome shotgun sequence - Vitis v      | 464.67  | 1 |
| tc AF036494 Eucryphia lucida large subunit 26S ribosomal RNA gene, partial sequer   | 36.05   | 1 |
| Unknown                                                                             | 68.93   | 1 |
| tc Rep: Chromosome undetermined scaffold_1009, whole genome shotgun sequen          | 58.94   | 1 |
| Unknown                                                                             | 66.94   | 1 |
| tc Rep: Intracellular chloride channel - Medicago truncatula (Barrel medic), comple | 19.28   | 1 |
| gb KR2B.105H17F.051227T7 KR2B Nicotiana tabacum cDNA clone KR2B.105H17, m           | 69.04   | 1 |
| tc Rep: Elongation factor 1-alpha - Nicotiana paniculata, partial (53%) [TC48055]   | 40.46   | 1 |
| Unknown                                                                             | 535.38  | 1 |
| Unknown                                                                             | 251.28  | 1 |
| Unknown                                                                             | 189.25  | 1 |
| tc Rep: ATP/GTP/Ca++ binding protein - Cucumis melo (Muskmelon), partial (80%)      | 29.93   | 1 |
| tc Rep: Bromodomain-containing RNA-binding protein 1 - Nicotiana benthamiana,       | 1742.47 | 1 |
| gb BP534468 MAT005 Nicotiana tabacum cDNA clone BY33047, mRNA sequence [E           | 706.63  | 1 |
| gb KT7C.106D10F.051219T7 KT7 Nicotiana tabacum cDNA clone KT7C.106D10, mRl          | 264.5   | 1 |
| gb KF8B.100M16F.051010T7 KF8 Nicotiana tabacum cDNA clone KF8B.100M16, mF           | 688.45  | 1 |



|                                                                                               |         |   |
|-----------------------------------------------------------------------------------------------|---------|---|
| gb Nicotiana tabacum S-adenosyl-L-homocysteine hydrolase (SAHH2) mRNA, comp                   | 816.88  | 1 |
| tc Rep: Chromosome chr4 scaffold_6, whole genome shotgun sequence - Vitis vinifera            | 4468.38 | 1 |
| tc Rep: 6-phosphogluconate dehydrogenase, decarboxylating - Spinacia oleracea (Spinach)       | 172.91  | 1 |
| tc Rep: 3-phosphoinositide-dependent protein kinase-1 - Solanum lycopersicum (Tomato)         | 2052.32 | 1 |
| gb AM816159 DL, diurnal library Nicotiana tabacum cDNA clone nt005033080, mRNA                | 132.32  | 1 |
| Unknown                                                                                       | 183.7   | 1 |
| gb KT7C.101C19F.051216T7 KT7 Nicotiana tabacum cDNA clone KT7C.101C19, mRNA                   | 83.38   | 1 |
| Unknown                                                                                       | 85.31   | 1 |
| gb FS411112 normalized full-length tobacco cDNA library Nicotiana tabacum cDNA                | 512.48  | 1 |
| gb KT7C.108N05F.051219T7 KT7 Nicotiana tabacum cDNA clone KT7C.108N05, mRNA                   | 17.24   | 1 |
| gb KL4B.101J19F.051103T7 KL4B Nicotiana tabacum cDNA clone KL4B.101J19, mRNA                  | 49.91   | 1 |
| gb KF8C.108M17F.051215T7 KF8 Nicotiana tabacum cDNA clone KF8C.108M17, mRNA                   | 2417.46 | 1 |
| Unknown                                                                                       | 324.89  | 1 |
| Unknown                                                                                       | 22.43   | 1 |
| gb KP1B.104M15F.050725T7 KP1B Nicotiana tabacum cDNA clone KP1B.104M15, mRNA                  | 146.63  | 1 |
| gb KT7C.102D07F.051216T7 KT7 Nicotiana tabacum cDNA clone KT7C.102D07, mRNA                   | 59.39   | 1 |
| tc Rep: eukaryotic translation initiation factor 2 family protein / eIF-2 family protein      | 145.56  | 1 |
| tc Rep: Heat shock 70 kDa protein, mitochondrial precursor - Phaseolus vulgaris (Kidney bean) | 29.06   | 1 |
| gb AGN_RNC030xh20f1.ab1 AGN_RNC Nicotiana tabacum cDNA 5', mRNA sequence                      | 136.34  | 1 |
| tc Rep: Chromosome chr7 scaffold_42, whole genome shotgun sequence - Vitis vinifera           | 476.67  | 1 |
| Unknown                                                                                       | 19.01   | 1 |
| tc Rep: Chromosome undetermined scaffold_174, whole genome shotgun sequence                   | 185.72  | 1 |
| tc Rep: Chromosome chr19 scaffold_4, whole genome shotgun sequence - Vitis vinifera           | 4268.6  | 1 |
| gb KL4B.112B04F.060131T7 KL4B Nicotiana tabacum cDNA clone KL4B.112B04, mRNA                  | 91.11   | 1 |
| gb TT-40_K13 K326 early senescent leaf library Nicotiana tabacum cDNA, mRNA sequence          | 272.19  | 1 |
| Unknown                                                                                       | 115.74  | 1 |
| gb KG9B.001P11F.050628T7 KG9B Nicotiana tabacum cDNA clone KG9B.001P11, mRNA                  | 54.31   | 1 |
| Unknown                                                                                       | 73.03   | 1 |
| tc Rep: AT3g42050/F4M19_10 - Arabidopsis thaliana (Mouse-ear cress), partial (35 nt)          | 160.66  | 1 |
| gb AGN_RPC019xa03f1.ab1 AGN_RPC Nicotiana tabacum cDNA 5', mRNA sequence                      | 535.63  | 1 |
| tc Rep: Chromosome chr12 scaffold_36, whole genome shotgun sequence - Vitis vinifera          | 9377.25 | 1 |
| gb KP1B.105L12F.060116T7 KP1B Nicotiana tabacum cDNA clone KP1B.105L12, mRNA                  | 39.95   | 1 |
| Unknown                                                                                       | 249.17  | 1 |
| tc Rep: Mutator-like transposase - Arabidopsis thaliana (Mouse-ear cress), partial (100 nt)   | 24.15   | 1 |

|                                                                                       |         |   |
|---------------------------------------------------------------------------------------|---------|---|
| gb KP1B.102J14F.050722T7 KP1B Nicotiana tabacum cDNA clone KP1B.102J14, mR            | 830.92  | 1 |
| Unknown                                                                               | 54.82   | 1 |
| gb Nicotiana tabacum PAP mRNA for purple acid phosphatase, complete cds, isolat       | 99.02   | 1 |
| gb KN6B.109A22F.060106T7 KN6B Nicotiana tabacum cDNA clone KN6B.109A22, n             | 44.96   | 1 |
| Unknown                                                                               | 278.15  | 1 |
| gb CHO_SL028xe07f1.ab1 CHO_SL Nicotiana tabacum cDNA, mRNA sequence [EH6              | 183.2   | 1 |
| Unknown                                                                               | 35.5    | 1 |
| gb KN6B.109B22F.060106T7 KN6B Nicotiana tabacum cDNA clone KN6B.109B22, n             | 104.63  | 1 |
| gb KT7C.112N01F.051221T7 KT7 Nicotiana tabacum cDNA clone KT7C.112N01, mR             | 112.73  | 1 |
| Unknown                                                                               | 247.23  | 1 |
| gb TT-47_E02 K326 early senescent leaf library Nicotiana tabacum cDNA, mRNA se        | 18.93   | 1 |
| tc Rep: Bet1-like SNARE 1-2 - Arabidopsis thaliana (Mouse-ear cress), partial (44%)   | 19.04   | 1 |
| tc Rep: 6-phosphogluconate dehydrogenase, decarboxylating - Spinacia oleracea (S      | 95.15   | 1 |
| Unknown                                                                               | 171.71  | 1 |
| tc Rep: Cap-binding protein CBP20 - Oryza sativa subsp. japonica (Rice), partial (76% | 124.54  | 1 |
| gb KG9B.003K24F.050720T7 KG9B Nicotiana tabacum cDNA clone KG9B.003K24, m             | 48.68   | 1 |
| tc Rep: Peroxidase 21 precursor - Arabidopsis thaliana (Mouse-ear cress), partial (2  | 94.89   | 1 |
| tc Rep: Chromosome chr8 scaffold_41, whole genome shotgun sequence - Vitis vin        | 32.4    | 1 |
| gb KP1B.107J12F.050726T7 KP1B Nicotiana tabacum cDNA clone KP1B.107J12, mR            | 97.62   | 1 |
| tc Rep: Serine/threonine protein phosphatase - Oryza sativa subsp. japonica (Rice),   | 789.66  | 1 |
| gb KG9B.001N14F.050628T7 KG9B Nicotiana tabacum cDNA clone KG9B.001N14, n             | 110.83  | 1 |
| Unknown                                                                               | 22.89   | 1 |
| gb KG9B.104J04F.060120T7 KG9B Nicotiana tabacum cDNA clone KG9B.104J04, mF            | 77.8    | 1 |
| gb TT-35_A06 Samsun trichome library Nicotiana tabacum cDNA, mRNA sequence            | 2022.48 | 1 |
| tc Rep: Chromosome chr5 scaffold_2, whole genome shotgun sequence - Vitis vinif       | 130.19  | 1 |
| gb KN6B.100I11F.051019T7 KN6B Nicotiana tabacum cDNA clone KN6B.100I11, mF            | 213.8   | 1 |
| gb KR3B.111G24F.060119T7 KR3B Nicotiana tabacum cDNA clone KR3B.111G24, m             | 1158.43 | 1 |
| gb CHO_SL013xo13f1.ab1 CHO_SL Nicotiana tabacum cDNA, mRNA sequence [EH6              | 781.89  | 1 |
| tc Rep: Methionine synthase - Nicotiana suaveolens, partial (40%) [TC45556]           | 18887.3 | 1 |
| tc Rep: Calcium-dependent protein kinases 5 - Solanum tuberosum (Potato), partia      | 1385.79 | 1 |
| gb AGN_RNC110xf05f1.ab1 AGN_RNC Nicotiana tabacum cDNA 5', mRNA sequenc               | 22.29   | 1 |
| gb Nicotiana tabacum cig3 mRNA, complete cds [AB041352]                               | 938.54  | 1 |
| gb KT7C.109A11F.051221T7 KT7 Nicotiana tabacum cDNA clone KT7C.109A11, mRI            | 89.73   | 1 |
| gb BP129744 MAT001 Nicotiana tabacum cDNA clone BY1631, mRNA sequence [Bf             | 71.81   | 1 |

|                                                                                      |         |   |
|--------------------------------------------------------------------------------------|---------|---|
| Unknown                                                                              | 208.56  | 1 |
| gb KL4B.105D03F.051104T7 KL4B Nicotiana tabacum cDNA clone KL4B.105D03, mF           | 8068.72 | 1 |
| Unknown                                                                              | 27.5    | 1 |
| Unknown                                                                              | 4496.06 | 1 |
| gb AGN_RNC007xo05f1.ab1 AGN_RNC Nicotiana tabacum cDNA 5', mRNA sequenc              | 189.08  | 1 |
| tc Rep: SRp25 nuclear protein isoform 4 - Takifugu rubripes, partial (11%) [TC6115€  | 56.46   | 1 |
| tc Rep: Chromosome chr2 scaffold_11, whole genome shotgun sequence - Vitis vin       | 91.84   | 1 |
| Unknown                                                                              | 476.75  | 1 |
| tc Rep: 40S ribosomal protein S12 - Vitis vinifera (Grape), partial (91%) [TC56412]  | 67.91   | 1 |
| tc Rep: Chromosome chr4 scaffold_6, whole genome shotgun sequence - Vitis vinif      | 244.72  | 1 |
| gb KN6B.109B20F.060106T7 KN6B Nicotiana tabacum cDNA clone KN6B.109B20, r            | 26.48   | 1 |
| Unknown                                                                              | 153.36  | 1 |
| Unknown                                                                              | 928.86  | 1 |
| tc Rep: Chromosome chr19 scaffold_66, whole genome shotgun sequence - Vitis vi       | 172.56  | 1 |
| tc Rep: Chromosome chr12 scaffold_78, whole genome shotgun sequence - Vitis vi       | 95.15   | 1 |
| tc Rep: Galactinol synthase - Brassica napus (Rape), partial (65%) [TC72414]         | 16.78   | 1 |
| tc Rep: Predicted protein - Physcomitrella patens subsp. patens, partial (46%) [TC4: | 2080.37 | 1 |
| gb BP534683 MAT005 Nicotiana tabacum cDNA clone BY33268, mRNA sequence [€            | 88.83   | 1 |
| Unknown                                                                              | 63.63   | 1 |
| gb KP1B.105A05F.060116T7 KP1B Nicotiana tabacum cDNA clone KP1B.105A05, m            | 103.28  | 1 |
| gb KR2B.110A15F.051229T7 KR2B Nicotiana tabacum cDNA clone KR2B.110A15, m            | 969.35  | 1 |
| gb KF8C.101E10F.051214T7 KF8 Nicotiana tabacum cDNA clone KF8C.101E10, mRN           | 86.14   | 1 |
| gb Nicotiana tabacum mRNA for cullin 1B (cul1B gene) [AJ344534]                      | 124.74  | 1 |
| tc Rep: Chromosome chr7 scaffold_42, whole genome shotgun sequence - Vitis vin       | 109.13  | 1 |
| tc Rep: Chromosome undetermined scaffold_125, whole genome shotgun sequenc           | 185.65  | 1 |
| gb KR2B.110N10F.051229T7 KR2B Nicotiana tabacum cDNA clone KR2B.110N10, m            | 6208.21 | 1 |
| Unknown                                                                              | 87.76   | 1 |
| Unknown                                                                              | 964.6   | 1 |
| Unknown                                                                              | 89.26   | 1 |
| gb TT-36_H09 Samsun trichome library Nicotiana tabacum cDNA, mRNA sequence           | 57.27   | 1 |
| tc Rep: Chromosome chr19 scaffold_4, whole genome shotgun sequence - Vitis vin       | 85.31   | 1 |
| Unknown                                                                              | 40.63   | 1 |
| gb KN6B.100N07F.051019T7 KN6B Nicotiana tabacum cDNA clone KN6B.100N07, r            | 21.42   | 1 |
| gb AM801773 seedling library, SL Nicotiana tabacum cDNA clone nt002125039, mF        | 20.78   | 1 |

|                                                                                           |         |   |
|-------------------------------------------------------------------------------------------|---------|---|
| gb KF8B.200P08F.060120T7 KF8 Nicotiana tabacum cDNA clone KF8B.200P08, mRNA               | 21012.9 | 1 |
| gb N.tabacum mRNA for profilin [X82120]                                                   | 9631.51 | 1 |
| gb KL4B.104N10F.051104T7 KL4B Nicotiana tabacum cDNA clone KL4B.104N10, mRNA              | 570.32  | 1 |
| Unknown                                                                                   | 19.49   | 1 |
| Unknown                                                                                   | 186     | 1 |
| gb Nicotiana tabacum mRNA for malate dehydrogenase (md1 gene) [AJ299256]                  | 75.58   | 1 |
| gb Nicotiana tabacum mRNA for 14-3-3 g-1 protein, complete cds [AB119477]                 | 254.92  | 1 |
| Unknown                                                                                   | 57.41   | 1 |
| gb TT-36_P21 Burley21 trichome library Nicotiana tabacum cDNA, mRNA sequence              | 224.17  | 1 |
| tc Rep: Chaperone GrpE type 2 - Nicotiana tabacum (Common tobacco), complete cds          | 20.91   | 1 |
| gb KT7C.102C17F.051216T7 KT7 Nicotiana tabacum cDNA clone KT7C.102C17, mRNA               | 119.74  | 1 |
| tc Rep: Chromosome chr18 scaffold_1, whole genome shotgun sequence - Vitis vinifera       | 52.04   | 1 |
| gb TT-37_M04 Samsun trichome library Nicotiana tabacum cDNA, mRNA sequence                | 65.84   | 1 |
| gb Nicotiana tabacum kinesin-like protein (tck1) mRNA, complete cds [U52078]              | 68.53   | 1 |
| gb KR3B.102G03F.051107T7 KR3B Nicotiana tabacum cDNA clone KR3B.102G03, mRNA              | 83.21   | 1 |
| tc Rep: Chromosome chr17 scaffold_16, whole genome shotgun sequence - Vitis vinifera      | 501.56  | 1 |
| gb Nicotiana tabacum NtVDAC3 mRNA for voltage-dependent anion channel, complete cds       | 513.85  | 1 |
| tc Rep: Polyubiquitin - Fragaria ananassa (Strawberry), partial (60%) [TC50969]           | 1739.68 | 1 |
| tc Rep: Chromosome chr2 scaffold_176, whole genome shotgun sequence - Vitis vinifera      | 559.5   | 1 |
| tc Rep: Mitochondrial carrier-like protein - Solanum tuberosum (Potato), partial (97%)    | 54.52   | 1 |
| tc Rep: Chromosome chr2 scaffold_132, whole genome shotgun sequence - Vitis vinifera      | 482.5   | 1 |
| Unknown                                                                                   | 132.97  | 1 |
| Unknown                                                                                   | 89.87   | 1 |
| tc Rep: TGF-beta receptor-interacting protein 1 - Phaseolus vulgaris (Kidney bean) (L)    | 645.74  | 1 |
| Unknown                                                                                   | 51.14   | 1 |
| Unknown                                                                                   | 46.79   | 1 |
| tc Rep: Pseudouridylate synthase - Vitis vinifera (Grape), partial (29%) [TC42500]        | 28.34   | 1 |
| gb KF8C.102A24F.051214T7 KF8 Nicotiana tabacum cDNA clone KF8C.102A24, mRNA               | 942     | 1 |
| tc Rep: Expressed protein - Oryza sativa subsp. japonica (Rice), partial (94%) [TC561]    | 262.23  | 1 |
| tc Rep: Chromosome chr14 scaffold_9, whole genome shotgun sequence - Vitis vinifera       | 70.42   | 1 |
| tc Rep: Os05g0119300 protein - Oryza sativa subsp. japonica (Rice), partial (64%) [TC561] | 1373.5  | 1 |
| gb KT7C.110I08F.051221T7 KT7 Nicotiana tabacum cDNA clone KT7C.110I08, mRNA               | 120.3   | 1 |
| gb KP1B.037H17F.050628T7 KP1B Nicotiana tabacum cDNA clone KP1B.037H17, mRNA              | 59.64   | 1 |
| gb KG9B.002J18F.050720T7 KG9B Nicotiana tabacum cDNA clone KG9B.002J18, mRNA              | 248.14  | 1 |

|                                                                                   |          |   |
|-----------------------------------------------------------------------------------|----------|---|
| Unknown                                                                           | 20.57    | 1 |
| tc Rep: Chromosome chr16 scaffold_86, whole genome shotgun sequence - Vitis vi    | 80.34    | 1 |
| Unknown                                                                           | 73.54    | 1 |
| gb TT-03_K11 K326 late senescent leaf library Nicotiana tabacum cDNA, mRNA seq    | 39.05    | 1 |
| tc Rep: Chromosome chr4 scaffold_6, whole genome shotgun sequence - Vitis vinif   | 80.41    | 1 |
| tc Rep: Cell growth defect factor-like - Solanum tuberosum (Potato), complete [TC | 206.35   | 1 |
| Unknown                                                                           | 36.08    | 1 |
| tc Rep: Chromosome chr1 scaffold_75, whole genome shotgun sequence - Vitis vin    | 93.85    | 1 |
| tc Rep: Chromosome chr12 scaffold_36, whole genome shotgun sequence - Vitis vi    | 7591.49  | 1 |
| gb EST_CSP008xj14f1.ab1 EST_CSP Nicotiana tabacum cDNA, mRNA sequence [EH         | 253.2    | 1 |
| gb KP1B.112K24F.060117T7 KP1B Nicotiana tabacum cDNA clone KP1B.112K24, m         | 180.01   | 1 |
| tc Rep: Ribosomal protein L11-like - Nicotiana tabacum (Common tobacco), compl    | 158.36   | 1 |
| Unknown                                                                           | 67.9     | 1 |
| Unknown                                                                           | 25.16    | 1 |
| gb KP1B.103K05F.050725T7 KP1B Nicotiana tabacum cDNA clone KP1B.103K05, m         | 23.28    | 1 |
| gb AGN_RNC009xn21f1.ab1 AGN_RNC Nicotiana tabacum cDNA 5', mRNA sequenc           | 69.48    | 1 |
| gb Nicotiana tabacum NtFAD3 mRNA for microsomal omega-3 acid desaturase, cor      | 38861.75 | 1 |
| tc Rep: Carbonic anhydrase, chloroplast precursor - Nicotiana tabacum (Common t   | 767.14   | 1 |
| Unknown                                                                           | 515.53   | 1 |
| gb TT-08_A10 K326 early senescent leaf library Nicotiana tabacum cDNA, mRNA se    | 29.17    | 1 |
| gb CHO_SL027xm02f1.ab1 CHO_SL Nicotiana tabacum cDNA, mRNA sequence [EH           | 27.9     | 1 |
| gb KT7C.105B24F.051219T7 KT7 Nicotiana tabacum cDNA clone KT7C.105B24, mR         | 4361.11  | 1 |
| tc Rep: Chromosome chr18 scaffold_1, whole genome shotgun sequence - Vitis vin    | 43.13    | 1 |
| Unknown                                                                           | 34.94    | 1 |
| Unknown                                                                           | 45.1     | 1 |
| tc Rep: Small GTP-binding protein Sar1BNt - Nicotiana tabacum (Common tobacco)    | 10029.17 | 1 |
| gb KF8B.200B21F.060120T7 KF8 Nicotiana tabacum cDNA clone KF8B.200B21, mRN        | 42.52    | 1 |
| gb KL4B.113H19F.060131T7 KL4B Nicotiana tabacum cDNA clone KL4B.113H19, m         | 84.98    | 1 |
| tc Rep: Chromosome chr6 scaffold_3, whole genome shotgun sequence - Vitis vinif   | 198.71   | 1 |
| gb KG9B.103C12F.051128T7 KG9B Nicotiana tabacum cDNA clone KG9B.103C12, m         | 76.39    | 1 |
| Unknown                                                                           | 218.22   | 1 |
| gb KG9B.102A23F.051126T7 KG9B Nicotiana tabacum cDNA clone KG9B.102A23, n         | 1732.6   | 1 |
| tc Rep: Chromosome chr11 scaffold_13, whole genome shotgun sequence - Vitis vi    | 39.91    | 1 |
| gb KL4B.108L11F.051105T7 KL4B Nicotiana tabacum cDNA clone KL4B.108L11, mR        | 231.54   | 1 |

|                                                                                  |         |   |
|----------------------------------------------------------------------------------|---------|---|
| gb KN6B.103M01F.060103T7 KN6B Nicotiana tabacum cDNA clone KN6B.103M01,          | 28.35   | 1 |
| gb AGN_PNL223af1_d5.trimmed.seq AGN_PNL Nicotiana tabacum cDNA 5', mRNA          | 466.72  | 1 |
| Unknown                                                                          | 111.05  | 1 |
| Unknown                                                                          | 133.28  | 1 |
| tc Rep: Chromosome chr17 scaffold_12, whole genome shotgun sequence - Vitis vi   | 19.05   | 1 |
| gb KG9B.001M06F.050628T7 KG9B Nicotiana tabacum cDNA clone KG9B.001M06,          | 997.64  | 1 |
| Unknown                                                                          | 153.01  | 1 |
| Unknown                                                                          | 96.22   | 1 |
| gb KP1B.113N02F.060117T7 KP1B Nicotiana tabacum cDNA clone KP1B.113N02, m        | 84.46   | 1 |
| Unknown                                                                          | 61.91   | 1 |
| tc Rep: BAC19.10 - Solanum lycopersicum (Tomato) (Lycopersicon esculentum), pa   | 26      | 1 |
| tc Rep: Chromosome chr6 scaffold_3, whole genome shotgun sequence - Vitis vinif  | 526.74  | 1 |
| tc Rep: Klr21 protein - Mus musculus (Mouse), partial (7%) [TC71239]             | 47.95   | 1 |
| Unknown                                                                          | 380.66  | 1 |
| Unknown                                                                          | 89.38   | 1 |
| Unknown                                                                          | 66.94   | 1 |
| gb AGN_ELP022xg17f1.ab1 AGN_ELP Nicotiana tabacum cDNA 5', mRNA sequence         | 81.62   | 1 |
| gb AGN_RNC211xc19f1.ab1 AGN_RNC Nicotiana tabacum cDNA 5', mRNA sequenc          | 86.33   | 1 |
| gb KL4B.101P03F.051103T7 KL4B Nicotiana tabacum cDNA clone KL4B.101P03, mR       | 168.22  | 1 |
| tc Rep: Chromosome chr11 scaffold_13, whole genome shotgun sequence - Vitis vi   | 25.56   | 1 |
| tc Rep: Chromosome undetermined scaffold_80, whole genome shotgun sequence       | 85.8    | 1 |
| gb KP1B.037A22F.050623T7 KP1B Nicotiana tabacum cDNA clone KP1B.037A22, m        | 238.54  | 1 |
| Unknown                                                                          | 668.33  | 1 |
| gb EST_CSP008xb10f1.ab1 EST_CSP Nicotiana tabacum cDNA, mRNA sequence [EH        | 187.23  | 1 |
| tc Rep: Polyprotein - Glycine max (Soybean), partial (3%) [TC62321]              | 27.6    | 1 |
| gb EST_CSP008xp15f1.ab1 EST_CSP Nicotiana tabacum cDNA, mRNA sequence [EH        | 294     | 1 |
| Unknown                                                                          | 84.25   | 1 |
| tc Rep: ATP synthase subunit gamma, mitochondrial precursor - Ipomoea batatas (' | 483.8   | 1 |
| Unknown                                                                          | 40.55   | 1 |
| Unknown                                                                          | 1673.93 | 1 |
| tc Rep: Chromosome chr18 scaffold_1, whole genome shotgun sequence - Vitis vin   | 549.83  | 1 |
| gb TT-40_N12 K326 early senescent leaf library Nicotiana tabacum cDNA, mRNA se   | 373.66  | 1 |
| tc Rep: Chromosome chr7 scaffold_31, whole genome shotgun sequence - Vitis vin   | 543.49  | 1 |
| Unknown                                                                          | 193.37  | 1 |

|                                                                                        |          |   |
|----------------------------------------------------------------------------------------|----------|---|
| Unknown                                                                                | 1127.75  | 1 |
| tc Rep: Chromosome undetermined scaffold_80, whole genome shotgun sequence             | 79.26    | 1 |
| Unknown                                                                                | 80.19    | 1 |
| Unknown                                                                                | 21.46    | 1 |
| tc Rep: Chromosome chr13 scaffold_74, whole genome shotgun sequence - Vitis vi         | 30.83    | 1 |
| gb AGN_RNC020xm09f1.ab1 AGN_RNC Nicotiana tabacum cDNA 5', mRNA sequen                 | 53.49    | 1 |
| tc Rep: ATP-dependent Clp protease proteolytic subunit - Vitis vinifera (Grape), par   | 31.66    | 1 |
| tc Rep: Chromosome chr6 scaffold_25, whole genome shotgun sequence - Vitis vin         | 254.41   | 1 |
| gb KR2B.104N05F.051227T7 KR2B Nicotiana tabacum cDNA clone KR2B.104N05, m              | 16898.35 | 1 |
| Unknown                                                                                | 254.61   | 1 |
| Unknown                                                                                | 161.93   | 1 |
| gb KN6B.009F03F.050901T7 KN6B Nicotiana tabacum cDNA clone KN6B.009F03, m              | 21.9     | 1 |
| gb AGN_ELP025xj05f1.ab1 AGN_ELP Nicotiana tabacum cDNA 5', mRNA sequence               | 4442.94  | 1 |
| Unknown                                                                                | 184.57   | 1 |
| tc Rep: Chromosome chr5 scaffold_2, whole genome shotgun sequence - Vitis vinif        | 149.68   | 1 |
| Unknown                                                                                | 46.47    | 1 |
| Unknown                                                                                | 34.54    | 1 |
| tc MIOBRN26 Oenothera berteriana mitochondrial gene for 26S ribosomal RNA, pa          | 47914.85 | 1 |
| gb KF8C.102F17F.051214T7 KF8 Nicotiana tabacum cDNA clone KF8C.102F17, mRN             | 11073.05 | 1 |
| Unknown                                                                                | 106.58   | 1 |
| gb KT7C.104K12F.051219T7 KT7 Nicotiana tabacum cDNA clone KT7C.104K12, mRN             | 20.92    | 1 |
| Unknown                                                                                | 118.92   | 1 |
| gb BL12.104I03F.060309T7 BL12 Nicotiana tabacum cDNA clone BL12.104I03, mRN            | 264.29   | 1 |
| gb KF8B.100E05F.051010T7 KF8 Nicotiana tabacum cDNA clone KF8B.100E05, mRN             | 39.39    | 1 |
| gb AGN_RNC014xn22f1.ab1 AGN_RNC Nicotiana tabacum cDNA 5', mRNA sequenc                | 125.15   | 1 |
| gb Nicotiana tabacum asparagine synthetase (din6) mRNA, partial cds [AY061820]         | 279.85   | 1 |
| gb TOBESTR124F07 TOBEST cDNA library 1 Nicotiana tabacum cDNA 5', mRNA sequ            | 1377.03  | 1 |
| gb AGN_RNC106xf10f1.ab1 AGN_RNC Nicotiana tabacum cDNA 5', mRNA sequenci               | 796.59   | 1 |
| gb Nicotiana tabacum receptor-like protein kinase (PRK4) mRNA, partial cds [AF252      | 694.64   | 1 |
| tc Rep: RNA-binding protein-like - Oryza sativa subsp. japonica (Rice), partial (9%) [ | 25.49    | 1 |
| tc Rep: Chromosome chr18 scaffold_1, whole genome shotgun sequence - Vitis vin         | 211.52   | 1 |
| gb KT7B.100K19F.051010T7 KT7 Nicotiana tabacum cDNA clone KT7B.100K19, mRN             | 271.66   | 1 |
| gb KR2B.111D04F.060128T7 KR2B Nicotiana tabacum cDNA clone KR2B.111D04, m              | 1262.99  | 1 |
| tc Rep: Brain protein 44-like - Zea mays (Maize), partial (89%) [TC53445]              | 1624.29  | 1 |

|                                                                                      |          |   |
|--------------------------------------------------------------------------------------|----------|---|
| tc Rep: Chromosome chr15 scaffold_40, whole genome shotgun sequence - Vitis vi       | 1016.62  | 1 |
| gb KN6B.103B18F.060103T7 KN6B Nicotiana tabacum cDNA clone KN6B.103B18, n            | 29.38    | 1 |
| Unknown                                                                              | 2903.76  | 1 |
| gb Nicotiana tabacum squalene synthase mRNA, complete cds [U60057]                   | 11311.55 | 1 |
| gb KG9B.001M17F.050628T7 KG9B Nicotiana tabacum cDNA clone KG9B.001M17,              | 21.67    | 1 |
| tc Rep: SRp25 nuclear protein isoform 4 - Takifugu rubripes, partial (11%) [TC6115€  | 59.6     | 1 |
| gb CHO_SL028xh11f1.ab1 CHO_SL Nicotiana tabacum cDNA, mRNA sequence [EH6             | 140.66   | 1 |
| tc Rep: Chromosome chr18 scaffold_1, whole genome shotgun sequence - Vitis vin       | 35.27    | 1 |
| Unknown                                                                              | 31.4     | 1 |
| Unknown                                                                              | 22.27    | 1 |
| tc Rep: Chromosome undetermined scaffold_147, whole genome shotgun sequenc           | 97.55    | 1 |
| gb AGN_PNL217af1_f3.trimmed.seq AGN_PNL Nicotiana tabacum cDNA 5', mRNA              | 23.66    | 1 |
| Unknown                                                                              | 1502.21  | 1 |
| tc Rep: Chloroplast pigment-binding protein CP29 - Nicotiana tabacum (Common t€      | 133.28   | 1 |
| gb TT-02_P09 K326 late senescent leaf library Nicotiana tabacum cDNA, mRNA seq       | 65.55    | 1 |
| gb KP1B.104H11F.050725T7 KP1B Nicotiana tabacum cDNA clone KP1B.104H11, m            | 64.16    | 1 |
| Unknown                                                                              | 727.68   | 1 |
| gb KG9B.105L24F.051128T7 KG9B Nicotiana tabacum cDNA clone KG9B.105L24, m            | 6482.08  | 1 |
| gb AM840522 seedling library, SL Nicotiana tabacum cDNA clone nt002322095, mF        | 177.67   | 1 |
| gb KF8C.102M09F.051214T7 KF8 Nicotiana tabacum cDNA clone KF8C.102M09, mF            | 2824.86  | 1 |
| tc Rep: Peroxisomal acyl-CoA oxidase 1A - Solanum lycopersicum (Tomato) (Lycope      | 493.48   | 1 |
| gb KG9B.103N16F.051128T7 KG9B Nicotiana tabacum cDNA clone KG9B.103N16, n            | 31.03    | 1 |
| tc Rep: Chromosome chr5 scaffold_98, whole genome shotgun sequence - Vitis vin       | 1601.77  | 1 |
| Unknown                                                                              | 80.12    | 1 |
| tc Rep: Chromosome chr5 scaffold_2, whole genome shotgun sequence - Vitis vinif      | 153.49   | 1 |
| gb KG9B.103J02F.051128T7 KG9B Nicotiana tabacum cDNA clone KG9B.103J02, mF           | 224.21   | 1 |
| tc Rep: Ribosomal protein S6-like protein - Solanum tuberosum (Potato), complete     | 220.65   | 1 |
| Unknown                                                                              | 29.91    | 1 |
| tc Rep: Ketol-acid reductoisomerase, chloroplast precursor - Arabidopsis thaliana (l | 220.27   | 1 |
| tc Rep: Chromosome undetermined scaffold_141, whole genome shotgun sequenc           | 92.6     | 1 |
| gb KF8B.201O22F.060124T7 KF8 Nicotiana tabacum cDNA clone KF8B.201O22, mRl           | 48.8     | 1 |
| tc Rep: Chromosome chr11 scaffold_13, whole genome shotgun sequence - Vitis vi       | 664.32   | 1 |
| tc Rep: Chromosome chr6 scaffold_3, whole genome shotgun sequence - Vitis vinif      | 235.1    | 1 |
| tc Rep: Phosphoglycerate mutase 1 - Lodderomyces elongisporus (Yeast) (Saccharo      | 20.9     | 1 |



|                                                                                  |         |   |
|----------------------------------------------------------------------------------|---------|---|
| gb KF8C.104D03F.051214T7 KF8 Nicotiana tabacum cDNA clone KF8C.104D03, mR        | 264.6   | 1 |
| tc Rep: Chromosome undetermined scaffold_484, whole genome shotgun sequenc       | 22.67   | 1 |
| Unknown                                                                          | 399.8   | 1 |
| gb KR3B.106K12F.051109T7 KR3B Nicotiana tabacum cDNA clone KR3B.106K12, m        | 111.28  | 1 |
| tc Rep: Chromosome chr5 scaffold_2, whole genome shotgun sequence - Vitis vinif  | 423.23  | 1 |
| Unknown                                                                          | 2817.87 | 1 |
| Unknown                                                                          | 31.94   | 1 |
| gb KN6B.102A05F.051230T7 KN6B Nicotiana tabacum cDNA clone KN6B.102A05, n        | 30.32   | 1 |
| gb AGN_RPC024xe18f1.ab1 AGN_RPC Nicotiana tabacum cDNA 5', mRNA sequenc          | 23.11   | 1 |
| gb KG9B.003J03F.050720T7 KG9B Nicotiana tabacum cDNA clone KG9B.003J03, m        | 1355.86 | 1 |
| Unknown                                                                          | 21.46   | 1 |
| tc Rep: 26S proteasome subunit 4-like - Solanum tuberosum (Potato), complete [TC | 186.61  | 1 |
| Unknown                                                                          | 28.41   | 1 |
| Unknown                                                                          | 64.83   | 1 |
| gb CHO_SL015xa22f2.ab1 CHO_SL Nicotiana tabacum cDNA, mRNA sequence [EH6         | 216.04  | 1 |
| Unknown                                                                          | 118.54  | 1 |
| gb TT-39_G18 Samsun trichome library Nicotiana tabacum cDNA, mRNA sequence       | 45.95   | 1 |
| gb EST_FLW004xn16f1.ab1 EST_FLW Nicotiana tabacum cDNA, mRNA sequence [E         | 3283.78 | 1 |
| gb KR2B.113C15F.060128T7 KR2B Nicotiana tabacum cDNA clone KR2B.113C15, m        | 85.28   | 1 |
| Unknown                                                                          | 7613.28 | 1 |
| tc Rep: Chromosome chr2 scaffold_187, whole genome shotgun sequence - Vitis vi   | 586.42  | 1 |
| tc Rep: Ly200-like protein - Solanum tuberosum (Potato), complete [TC54910]      | 152.86  | 1 |
| gb KP1B.105P17F.060116T7 KP1B Nicotiana tabacum cDNA clone KP1B.105P17, m        | 58.54   | 1 |
| gb CHO_SL016xl02f1.ab1 CHO_SL Nicotiana tabacum cDNA, mRNA sequence [EH62        | 96.95   | 1 |
| tc Rep: Chromosome chr19 scaffold_4, whole genome shotgun sequence - Vitis vin   | 149.2   | 1 |
| Unknown                                                                          | 8470.53 | 1 |
| gb FS411872 normalized full-length tobacco cDNA library Nicotiana tabacum cDNA   | 118.94  | 1 |
| gb AM792645 DL, diurnal library Nicotiana tabacum cDNA clone nt005008015, mR     | 165.29  | 1 |
| tc Rep: Chromosome chr7 scaffold_31, whole genome shotgun sequence - Vitis vin   | 24.21   | 1 |
| tc Rep: Chromosome chr17 scaffold_12, whole genome shotgun sequence - Vitis vi   | 87.05   | 1 |
| tc Rep: Chromosome chr9 scaffold_7, whole genome shotgun sequence - Vitis vinif  | 35.73   | 1 |
| tc Rep: Ubiquitin carrier protein - Mesembryanthemum crystallinum (Common ice    | 4072.76 | 1 |
| gb KN6B.102H06F.051230T7 KN6B Nicotiana tabacum cDNA clone KN6B.102H06, n        | 973.12  | 1 |
| gb AGN_RNC003xo15f1.ab1 AGN_RNC Nicotiana tabacum cDNA 5', mRNA sequenc          | 531.77  | 1 |

|                                                                                    |          |   |
|------------------------------------------------------------------------------------|----------|---|
| tc Rep: Chromosome chr13 scaffold_210, whole genome shotgun sequence - Vitis v     | 39.51    | 1 |
| Unknown                                                                            | 86.04    | 1 |
| gb TT-22_E07 Burley21 trichome library Nicotiana tabacum cDNA, mRNA sequence       | 41.83    | 1 |
| gb KF8C.103J17F.051214T7 KF8 Nicotiana tabacum cDNA clone KF8C.103J17, mRN         | 72.8     | 1 |
| gb TT-16_O13 Samsun trichome library Nicotiana tabacum cDNA, mRNA sequence         | 1176.37  | 1 |
| gb KP1B.107N12F.050726T7 KP1B Nicotiana tabacum cDNA clone KP1B.107N12, m          | 54.66    | 1 |
| gb KT7C.105A10F.051219T7 KT7 Nicotiana tabacum cDNA clone KT7C.105A10, mRI         | 61.03    | 1 |
| tc Rep: Cytochrome b-c1 complex subunit Rieske-2, mitochondrial precursor - Nico   | 11475.35 | 1 |
| Unknown                                                                            | 46.68    | 1 |
| gb KT7C.106M08F.051219T7 KT7 Nicotiana tabacum cDNA clone KT7C.106M08, ml          | 226.03   | 1 |
| Unknown                                                                            | 509.44   | 1 |
| tc Rep: Chromosome chr15 scaffold_40, whole genome shotgun sequence - Vitis vi     | 74.87    | 1 |
| Unknown                                                                            | 2193.69  | 1 |
| Unknown                                                                            | 2421.75  | 1 |
| gb KF8C.101D20F.051214T7 KF8 Nicotiana tabacum cDNA clone KF8C.101D20, mRI         | 61.94    | 1 |
| gb KL4B.110N16F.051106T7 KL4B Nicotiana tabacum cDNA clone KL4B.110N16, mF         | 50.71    | 1 |
| tc Rep: 6-phosphogluconate dehydrogenase, decarboxylating - Spinacia oleracea (S   | 19.85    | 1 |
| gb CHO_SL004xk19f1.ab1 CHO_SL Nicotiana tabacum cDNA, mRNA sequence [EH6           | 260.13   | 1 |
| tc Rep: AGO4-2 - Nicotiana benthamiana, partial (24%) [TC49762]                    | 198.87   | 1 |
| gb AGN_ELP005xb08f1.ab1 AGN_ELP Nicotiana tabacum cDNA 5', mRNA sequence           | 64.27    | 1 |
| tc Rep: Chromosome chr1 scaffold_22, whole genome shotgun sequence - Vitis vin     | 69.29    | 1 |
| tc Rep: Fiber protein Fb15 - Gossypium barbadense (Sea-island cotton) (Egyptian cc | 984.62   | 1 |
| Unknown                                                                            | 38.78    | 1 |
| Unknown                                                                            | 70.77    | 1 |
| Unknown                                                                            | 32.17    | 1 |
| gb KG9B.004L06F.050721T7 KG9B Nicotiana tabacum cDNA clone KG9B.004L06, m          | 270.19   | 1 |
| gb Nicotiana tabacum callus associated protein (CAP) mRNA, partial cds [U01961]    | 59.82    | 1 |
| Unknown                                                                            | 36.07    | 1 |
| gb KT7C.106O01F.051219T7 KT7 Nicotiana tabacum cDNA clone KT7C.106O01, mR          | 73.65    | 1 |
| gb AGN_RNC014xg05f1.ab1 AGN_RNC Nicotiana tabacum cDNA 5', mRNA sequenc            | 88.57    | 1 |
| tc Rep: 14-3-3-like protein C - Nicotiana tabacum (Common tobacco), complete [TC   | 1511.75  | 1 |
| tc Rep: Chromosome chr17 scaffold_12, whole genome shotgun sequence - Vitis vi     | 942.51   | 1 |
| Unknown                                                                            | 75.19    | 1 |
| gb KN6B.110B13F.060106T7 KN6B Nicotiana tabacum cDNA clone KN6B.110B13, n          | 176.33   | 1 |

|                                                                                     |          |   |
|-------------------------------------------------------------------------------------|----------|---|
| tc Rep: Cysteine synthase - Nicotiana plumbaginifolia (Leadwort-leaved tobacco), c  | 7815.95  | 1 |
| Unknown                                                                             | 46.95    | 1 |
| gb KR2B.110P09F.051229T7 KR2B Nicotiana tabacum cDNA clone KR2B.110P09, m           | 23.97    | 1 |
| tc Rep: Chromosome chr17 scaffold_12, whole genome shotgun sequence - Vitis vi      | 151.25   | 1 |
| Unknown                                                                             | 951.24   | 1 |
| gb KG9B.004I08F.050721T7 KG9B Nicotiana tabacum cDNA clone KG9B.004I08, mR          | 37.18    | 1 |
| gb TT-01_E10 K326 late senescent leaf library Nicotiana tabacum cDNA, mRNA seq      | 1476.11  | 1 |
| Unknown                                                                             | 29.36    | 1 |
| gb KF8B.202G14F.060124T7 KF8 Nicotiana tabacum cDNA clone KF8B.202G14, mRI          | 82.39    | 1 |
| gb Nicotiana tabacum mRNA for NtWRKY1, complete cds [AB022693]                      | 17.9     | 1 |
| Unknown                                                                             | 193.25   | 1 |
| tc Rep: Chromosome chr15 scaffold_82, whole genome shotgun sequence - Vitis vi      | 17923.3  | 1 |
| tc Rep: Chromosome chr14 scaffold_21, whole genome shotgun sequence - Vitis vi      | 31.07    | 1 |
| Unknown                                                                             | 3242.43  | 1 |
| gb KF8C.102H18F.051214T7 KF8 Nicotiana tabacum cDNA clone KF8C.102H18, mRI          | 2979.47  | 1 |
| tc Rep: Chromosome chr14 scaffold_21, whole genome shotgun sequence - Vitis vi      | 41.88    | 1 |
| tc Rep: Chromosome undetermined scaffold_163, whole genome shotgun sequenc          | 2844.86  | 1 |
| Unknown                                                                             | 1568.51  | 1 |
| gb KL4B.112F04F.060131T7 KL4B Nicotiana tabacum cDNA clone KL4B.112F04, mR          | 144.39   | 1 |
| tc Rep: Chromosome chr19 scaffold_35, whole genome shotgun sequence - Vitis vi      | 524.47   | 1 |
| tc Rep: Histone H2A - Vitis vinifera (Grape), partial (96%) [TC64662]               | 250.26   | 1 |
| gb Nicotiana tabacum NtVDAC1 mRNA for voltage-dependent anion channel, comp         | 167.96   | 1 |
| Unknown                                                                             | 1432.1   | 1 |
| gb Nicotiana tabacum clone pHSM4 cytosolic class I small heat shock protein 6 mRI   | 104.32   | 1 |
| tc Rep: Chromosome chr17 scaffold_12, whole genome shotgun sequence - Vitis vi      | 211.63   | 1 |
| tc Rep: Chromosome chr6 scaffold_3, whole genome shotgun sequence - Vitis vinif     | 126.58   | 1 |
| gb AGN_PNL208df1_e9.trimmed.seq AGN_PNL Nicotiana tabacum cDNA 5', mRNA             | 171.48   | 1 |
| Unknown                                                                             | 66.47    | 1 |
| gb Nicotiana tabacum pectin methylesterase (PPME1) mRNA, complete cds [AY772        | 27019.15 | 1 |
| gb KT7C.106P02F.051219T7 KT7 Nicotiana tabacum cDNA clone KT7C.106P02, mRI          | 39.8     | 1 |
| Unknown                                                                             | 59.72    | 1 |
| gb AGN_RNC015xe23f1.ab1 AGN_RNC Nicotiana tabacum cDNA 5', mRNA sequenc             | 99.08    | 1 |
| tc Rep: DNA cross-link repair protein SNM1 - Arabidopsis thaliana (Mouse-ear cress  | 67.18    | 1 |
| tc Rep: 40S ribosomal protein S12 - Vitis vinifera (Grape), partial (91%) [TC53842] | 80.76    | 1 |

|                                                                                                          |         |   |
|----------------------------------------------------------------------------------------------------------|---------|---|
| Unknown                                                                                                  | 544.38  | 1 |
| gb KL4B.106D12F.051125T7 KL4B Nicotiana tabacum cDNA clone KL4B.106D12, mF                               | 401.49  | 1 |
| tc Rep: Chromosome chr5 scaffold_2, whole genome shotgun sequence - Vitis vinifera                       | 32.21   | 1 |
| Unknown                                                                                                  | 255.25  | 1 |
| gb KL4B.105D02F.051104T7 KL4B Nicotiana tabacum cDNA clone KL4B.105D02, mF                               | 211.35  | 1 |
| tc Rep: Chromosome chr17 scaffold_12, whole genome shotgun sequence - Vitis vinifera                     | 29.26   | 1 |
| Unknown                                                                                                  | 1559.93 | 1 |
| gb KP1B.107J01F.050726T7 KP1B Nicotiana tabacum cDNA clone KP1B.107J01, mR                               | 525.76  | 1 |
| gb EST_CSP005xn18f1.ab1 EST_CSP Nicotiana tabacum cDNA, mRNA sequence [EHTC61967]                        | 28.51   | 1 |
| tc Rep: Chromosome undetermined scaffold_334, whole genome shotgun sequence - Vitis vinifera             | 3498.71 | 1 |
| Unknown                                                                                                  | 114.21  | 1 |
| tc Rep: Chromosome chr18 scaffold_1, whole genome shotgun sequence - Vitis vinifera                      | 10716   | 1 |
| tc Rep: At5g12240 - Arabidopsis thaliana (Mouse-ear cress), partial (67%) [TC61967]                      | 465.85  | 1 |
| tc Rep: Proline-rich protein family-like - Oryza sativa subsp. japonica (Rice), partial (67%) [AJ344533] | 474.59  | 1 |
| gb Nicotiana tabacum mRNA for cullin 1A (cul1A gene) [AJ344533]                                          | 1782.92 | 1 |
| tc Rep: Chromosome chr13 scaffold_17, whole genome shotgun sequence - Vitis vinifera                     | 1283.88 | 1 |
| gb Nicotiana tabacum calcium-dependent protein kinase CPK4 mRNA, complete cds                            | 532.23  | 1 |
| gb KL4B.100M24F.050922T7 KL4B Nicotiana tabacum cDNA clone KL4B.100M24, mR                               | 70.11   | 1 |
| Unknown                                                                                                  | 32.38   | 1 |
| gb Nicotiana tabacum mRNA for alpha-tubulin (tubA2 gene) [AJ421412]                                      | 18301.7 | 1 |
| gb KN6B.102A21F.051230T7 KN6B Nicotiana tabacum cDNA clone KN6B.102A21, mR                               | 27.24   | 1 |
| Unknown                                                                                                  | 461.87  | 1 |
| Unknown                                                                                                  | 154.03  | 1 |
| gb Nicotiana tabacum PCNA mRNA for proliferating cell nuclear antigen, complete cds                      | 32.42   | 1 |
| Unknown                                                                                                  | 154.97  | 1 |
| tc Rep: Chromosome chr8 scaffold_29, whole genome shotgun sequence - Vitis vinifera                      | 69.18   | 1 |
| Unknown                                                                                                  | 79.49   | 1 |
| Unknown                                                                                                  | 412.04  | 1 |
| gb KR3B.114A02F.060119T7 KR3B Nicotiana tabacum cDNA clone KR3B.114A02, mR                               | 298.38  | 1 |
| Unknown                                                                                                  | 17.25   | 1 |
| tc Rep: Chromosome chr5 scaffold_2, whole genome shotgun sequence - Vitis vinifera                       | 183.71  | 1 |
| gb KG9B.002F15F.050720T7 KG9B Nicotiana tabacum cDNA clone KG9B.002F15, mR                               | 24.67   | 1 |
| gb KG9B.106A24F.051129T7 KG9B Nicotiana tabacum cDNA clone KG9B.106A24, mR                               | 39.6    | 1 |
| gb KR3B.102G14F.051107T7 KR3B Nicotiana tabacum cDNA clone KR3B.102G14, mR                               | 49.89   | 1 |

|                                                                                   |         |   |
|-----------------------------------------------------------------------------------|---------|---|
| Unknown                                                                           | 48.8    | 1 |
| gb KF8C.102A03F.051214T7 KF8 Nicotiana tabacum cDNA clone KF8C.102A03, mRNA       | 35.35   | 1 |
| gb CHO_SL012xm12f1.ab1 CHO_SL Nicotiana tabacum cDNA, mRNA sequence [EHC          | 33.81   | 1 |
| tc Rep: Chromosome chr11 scaffold_14, whole genome shotgun sequence - Vitis vi    | 50.28   | 1 |
| tc Rep: Chromosome chr11 scaffold_13, whole genome shotgun sequence - Vitis vi    | 432.01  | 1 |
| tc Rep: Chromosome chr5 scaffold_2, whole genome shotgun sequence - Vitis vinif   | 52.67   | 1 |
| tc Rep: Chromosome chr11 scaffold_13, whole genome shotgun sequence - Vitis vi    | 33.45   | 1 |
| gb TT-06_K08 K326 early senescent leaf library Nicotiana tabacum cDNA, mRNA se    | 239.79  | 1 |
| tc Rep: Chromosome chr10 scaffold_50, whole genome shotgun sequence - Vitis vi    | 3115.85 | 1 |
| gb Nicotiana tabacum hexose transporter (pGlcT) mRNA, partial cds; nuclear gene f | 42.15   | 1 |
| Unknown                                                                           | 84.34   | 1 |
| Unknown                                                                           | 79.74   | 1 |
| gb KP1B.110B02F.050727T7 KP1B Nicotiana tabacum cDNA clone KP1B.110B02, ml        | 3513.35 | 1 |
| Unknown                                                                           | 136.01  | 1 |
| Unknown                                                                           | 162.88  | 1 |
| gb 10F11 Transformed tobacco Lambda Zap II library Nicotiana tabacum cDNA 5', n   | 44.9    | 1 |
| gb KF8C.104L08F.051214T7 KF8 Nicotiana tabacum cDNA clone KF8C.104L08, mRN        | 720.97  | 1 |
| Unknown                                                                           | 61.76   | 1 |
| Unknown                                                                           | 25.98   | 1 |
| gb TT-48_D03 K326 late senescent leaf library Nicotiana tabacum cDNA, mRNA seq    | 18.64   | 1 |
| gb KP1B.103G20F.050725T7 KP1B Nicotiana tabacum cDNA clone KP1B.103G20, m         | 31.85   | 1 |
| gb TT-07_C15 K326 early senescent leaf library Nicotiana tabacum cDNA, mRNA se    | 379.61  | 1 |
| gb AGN_RNC014xe20f1.ab1 AGN_RNC Nicotiana tabacum cDNA 5', mRNA sequenc           | 1996.17 | 1 |
| Unknown                                                                           | 31.85   | 1 |
| gb TT-29_D08 K326 trichome library Nicotiana tabacum cDNA, mRNA sequence [FC      | 395.46  | 1 |
| gb Nicotiana tabacum inosine-5'-phosphate dehydrogenase (guaB) mRNA, partial c    | 31.22   | 1 |
| gb KP1B.101G06F.050722T7 KP1B Nicotiana tabacum cDNA clone KP1B.101G06, m         | 1016.53 | 1 |
| gb KG9B.001K18F.050628T7 KG9B Nicotiana tabacum cDNA clone KG9B.001K18, m         | 92.34   | 1 |
| tc Rep: Chromosome chr17 scaffold_12, whole genome shotgun sequence - Vitis vi    | 37.55   | 1 |
| tc Rep: Chromosome chr5 scaffold_2, whole genome shotgun sequence - Vitis vinif   | 722.12  | 1 |
| Unknown                                                                           | 977.12  | 1 |
| gb KG9B.001P10F.050628T7 KG9B Nicotiana tabacum cDNA clone KG9B.001P10, m         | 19.98   | 1 |
| gb Nicotiana tabacum mRNA for BY-2 kinesin-like protein 5, complete cds [AB0030.  | 464.17  | 1 |
| tc Rep: Chromosome chr4 scaffold_6, whole genome shotgun sequence - Vitis vinif   | 253.16  | 1 |

|                                                                                      |         |   |
|--------------------------------------------------------------------------------------|---------|---|
| tc Rep: Chromosome chr3 scaffold_8, whole genome shotgun sequence - Vitis vinifera   | 137.62  | 1 |
| Unknown                                                                              | 1014.36 | 1 |
| tc Rep: Anthocyanidin 3-O-glucosyltransferase - Petunia hybrida (Petunia), partial ( | 21.91   | 1 |
| gb KR2B.110E10F.051229T7 KR2B Nicotiana tabacum cDNA clone KR2B.110E10, mR           | 55.88   | 1 |
| tc Rep: Chromosome chr8 scaffold_115, whole genome shotgun sequence - Vitis vi       | 49.16   | 1 |
| gb AGN_RNC108xi21f1.ab1 AGN_RNC Nicotiana tabacum cDNA 5', mRNA sequence             | 392.98  | 1 |
| Unknown                                                                              | 955.71  | 1 |
| Unknown                                                                              | 29.76   | 1 |
| tc Rep: Chromosome chr11 scaffold_13, whole genome shotgun sequence - Vitis vi       | 23.7    | 1 |
| gb KP1B.108I06F.050726T7 KP1B Nicotiana tabacum cDNA clone KP1B.108I06, mR           | 521.14  | 1 |
| Unknown                                                                              | 41.67   | 1 |
| gb Nicotiana tabacum EIL5 mRNA, complete cds [AY248907]                              | 26.58   | 1 |
| tc Rep: Chromosome chr12 scaffold_47, whole genome shotgun sequence - Vitis vi       | 762.89  | 1 |
| gb CHO_SL013xa08f1.ab1 CHO_SL Nicotiana tabacum cDNA, mRNA sequence [EH6             | 661.32  | 1 |
| Unknown                                                                              | 18.78   | 1 |
| tc Rep: Chromosome chr14 scaffold_27, whole genome shotgun sequence - Vitis vi       | 123.55  | 1 |
| tc Rep: Chromosome chr19 scaffold_4, whole genome shotgun sequence - Vitis vin       | 18446.8 | 1 |
| gb KF8C.102K09F.051214T7 KF8 Nicotiana tabacum cDNA clone KF8C.102K09, mRN           | 389.23  | 1 |
| gb KF8C.104O06F.051214T7 KF8 Nicotiana tabacum cDNA clone KF8C.104O06, mR            | 34.83   | 1 |
| gb KG9B.105N17F.051128T7 KG9B Nicotiana tabacum cDNA clone KG9B.105N17, n            | 24.47   | 1 |
| Unknown                                                                              | 17.25   | 1 |
| gb KR2B.112I06F.051230T7 KR2B Nicotiana tabacum cDNA clone KR2B.112I06, mR           | 729.89  | 1 |
| tc Rep: Protein phosphatase 2C - Mesembryanthemum crystallinum (Common ice p         | 4317.2  | 1 |
| gb TT-19_K24 tobacco leaf library Nicotiana tabacum cDNA, mRNA sequence [FG6         | 44.33   | 1 |
| Unknown                                                                              | 22.2    | 1 |
| gb KF8C.101M24F.051214T7 KF8 Nicotiana tabacum cDNA clone KF8C.101M24, mR            | 4445.65 | 1 |
| gb TT-14_E22 K326 late senescent leaf library Nicotiana tabacum cDNA, mRNA seq       | 61.42   | 1 |
| tc Rep: Chromosome chr1 scaffold_75, whole genome shotgun sequence - Vitis vin       | 547.94  | 1 |
| Unknown                                                                              | 1523.52 | 1 |
| gb TT-26_I03 Samsun trichome library Nicotiana tabacum cDNA, mRNA sequence [         | 30.14   | 1 |
| gb AGN_RPC005xl10f1.ab1 AGN_RPC Nicotiana tabacum cDNA 5', mRNA sequence             | 20.05   | 1 |
| gb KR3B.105A06F.051109T7 KR3B Nicotiana tabacum cDNA clone KR3B.105A06, m            | 383.8   | 1 |
| gb N.tabacum mRNA for c subunit of V-type ATPase (980 bp) [X95752]                   | 777.17  | 1 |
| gb KF8C.104K08F.051214T7 KF8 Nicotiana tabacum cDNA clone KF8C.104K08, mRN           | 186.68  | 1 |

|                                                                                                     |          |   |
|-----------------------------------------------------------------------------------------------------|----------|---|
| gb KF8C.103D11F.051214T7 KF8 Nicotiana tabacum cDNA clone KF8C.103D11, mRNA                         | 929.35   | 1 |
| tc Rep: Ribosomal protein PETRP - Capsicum annuum (Bell pepper), complete [TC46581]                 | 27.99    | 1 |
| gb KT7C.105K19F.051219T7 KT7 Nicotiana tabacum cDNA clone KT7C.105K19, mRNA                         | 101.82   | 1 |
| gb KT7C.109P20F.051221T7 KT7 Nicotiana tabacum cDNA clone KT7C.109P20, mRNA                         | 166.23   | 1 |
| tc Rep: Chromosome undetermined scaffold_470, whole genome shotgun sequence                         | 24.15    | 1 |
| tc Rep: Chromosome chr13 scaffold_48, whole genome shotgun sequence - Vitis vinifera                | 101.16   | 1 |
| Unknown                                                                                             | 50.46    | 1 |
| Unknown                                                                                             | 351.28   | 1 |
| tc Rep: Chromosome chr5 scaffold_2, whole genome shotgun sequence - Vitis vinifera                  | 80.27    | 1 |
| tc Rep: Chromosome chr10 scaffold_43, whole genome shotgun sequence - Vitis vinifera                | 47.23    | 1 |
| Unknown                                                                                             | 47.69    | 1 |
| tc Rep: Oligopeptidase A - Medicago truncatula (Barrel medic), partial (98%) [TC46581]              | 26.51    | 1 |
| tc Rep: Mitochondrial processing peptidase - Solanum tuberosum (Potato), partial (96%) [TC46581]    | 1143.05  | 1 |
| Unknown                                                                                             | 637.6    | 1 |
| gb KR2B.108M13F.051229T7 KR2B Nicotiana tabacum cDNA clone KR2B.108M13, mRNA                        | 39.56    | 1 |
| tc Rep: Thioredoxin H-type 1 - Nicotiana tabacum (Common tobacco), partial (96%) [TC46581]          | 139.55   | 1 |
| Unknown                                                                                             | 94.18    | 1 |
| tc Rep: Chromosome chr11 scaffold_13, whole genome shotgun sequence - Vitis vinifera                | 28.89    | 1 |
| gb KP1B.101B18F.050722T7 KP1B Nicotiana tabacum cDNA clone KP1B.101B18, mRNA                        | 172.53   | 1 |
| gb Nicotiana tabacum ntp805 (pntp805) mRNA, complete cds [AY366400]                                 | 52979.2  | 1 |
| Unknown                                                                                             | 2397.11  | 1 |
| gb Nicotiana tabacum S-adenosyl-methionine-sterol-C-methyltransferase mRNA, complete cds [AY366400] | 14979.95 | 1 |
| tc Rep: Chromosome chr8 scaffold_23, whole genome shotgun sequence - Vitis vinifera                 | 46.61    | 1 |
| gb KP1B.104L22F.050725T7 KP1B Nicotiana tabacum cDNA clone KP1B.104L22, mRNA                        | 946.97   | 1 |
| tc Rep: Chloroplast 30S ribosomal protein S15 - Nicotiana sylvestris (Wood tobacco)                 | 23.38    | 1 |
| Unknown                                                                                             | 24.66    | 1 |
| tc Rep: Calmodulin-related protein - Petunia hybrida (Petunia), partial (83%) [TC70121]             | 82.43    | 1 |
| Unknown                                                                                             | 380.38   | 1 |
| tc Rep: Chromosome undetermined scaffold_235, whole genome shotgun sequence                         | 85.71    | 1 |
| tc Rep: Chromosome chr6 scaffold_15, whole genome shotgun sequence - Vitis vinifera                 | 175.57   | 1 |
| gb KP1B.110G12F.050727T7 KP1B Nicotiana tabacum cDNA clone KP1B.110G12, mRNA                        | 88.03    | 1 |
| Unknown                                                                                             | 180.03   | 1 |
| gb KP1B.105H02F.060116T7 KP1B Nicotiana tabacum cDNA clone KP1B.105H02, mRNA                        | 4498.45  | 1 |
| gb KP1B.112P05F.060117T7 KP1B Nicotiana tabacum cDNA clone KP1B.112P05, mRNA                        | 139.81   | 1 |

|                                                                                      |         |   |
|--------------------------------------------------------------------------------------|---------|---|
| tc Rep: Aluminum-induced protein - Codonopsis lanceolata, partial (78%) [TC42573     | 36      | 1 |
| gb Nicotiana tabacum putative translation initiation factor 2B beta subunit (NIFb) n | 35.72   | 1 |
| gb AGN_RNC128xh08f1.ab1 AGN_RNC Nicotiana tabacum cDNA 5', mRNA sequenc              | 195.21  | 1 |
| gb KG9B.103L12F.051128T7 KG9B Nicotiana tabacum cDNA clone KG9B.103L12, m            | 223.08  | 1 |
| Unknown                                                                              | 4637.61 | 1 |
| tc Rep: Pyruvate dehydrogenase E1 beta subunit - Arabidopsis thaliana (Mouse-ear     | 50.79   | 1 |
| tc Rep: Thioredoxin peroxidase - Nicotiana tabacum (Common tobacco), complete        | 32.15   | 1 |
| Unknown                                                                              | 542.12  | 1 |
| Unknown                                                                              | 67.77   | 1 |
| gb Nicotiana tabacum putative UDP-glucuronate decarboxylase 4 mRNA, partial cd       | 1578.87 | 1 |
| gb KR3B.101B08F.051107T7 KR3B Nicotiana tabacum cDNA clone KR3B.101B08, m            | 65.14   | 1 |
| gb AGN_RNC013xe15f1.ab1 AGN_RNC Nicotiana tabacum cDNA 5', mRNA sequenc              | 527.29  | 1 |
| gb AGN_PNL221df1_d12.trimmed.seq AGN_PNL Nicotiana tabacum cDNA 5', mRN.             | 428.19  | 1 |
| tc Rep: TPK1 - Nicotiana tabacum (Common tobacco), complete [TC64081]                | 254.9   | 1 |
| gb AGN_RPC017xc15f1.ab1 AGN_RPC Nicotiana tabacum cDNA 5', mRNA sequenc              | 1372.17 | 1 |
| gb KL4B.101H01F.051103T7 KL4B Nicotiana tabacum cDNA clone KL4B.101H01, mF           | 29.64   | 1 |
| Unknown                                                                              | 22.91   | 1 |
| Unknown                                                                              | 1542.29 | 1 |
| Unknown                                                                              | 21.29   | 1 |
| gb KG9B.001L18F.050628T7 KG9B Nicotiana tabacum cDNA clone KG9B.001L18, m            | 86.14   | 1 |
| tc Rep: Formate--tetrahydrofolate ligase - Spinacia oleracea (Spinach), partial (25% | 57.82   | 1 |
| Unknown                                                                              | 27.76   | 1 |
| tc Rep: Chromosome chr1 scaffold_46, whole genome shotgun sequence - Vitis vin       | 57.35   | 1 |
| Unknown                                                                              | 745.43  | 1 |
| tc Rep: Plant viral-response family protein - Solanum bulbocastanum (Wild potato)    | 223.06  | 1 |
| tc Rep: Chromosome chr10 scaffold_43, whole genome shotgun sequence - Vitis vi       | 70.67   | 1 |
| tc Rep: Chromosome chr16 scaffold_10, whole genome shotgun sequence - Vitis vi       | 31.65   | 1 |
| Unknown                                                                              | 21.05   | 1 |
| gb KN6B.108A05F.060106T7 KN6B Nicotiana tabacum cDNA clone KN6B.108A05, n            | 130.14  | 1 |
| tc Rep: Ribosomal Pr 117 - Triticum aestivum (Wheat), partial (95%) [TC48773]        | 172.53  | 1 |
| Unknown                                                                              | 41.77   | 1 |
| gb AGN_PNL221df1_g8.trimmed.seq AGN_PNL Nicotiana tabacum cDNA 5', mRNA              | 23.3    | 1 |
| tc Rep: Chromosome chr7 scaffold_42, whole genome shotgun sequence - Vitis vin       | 117.78  | 1 |
| Unknown                                                                              | 2785.34 | 1 |



|                                                                                      |          |   |
|--------------------------------------------------------------------------------------|----------|---|
| tc Rep: Chromosome chr8 scaffold_34, whole genome shotgun sequence - Vitis vin       | 1688.91  | 1 |
| Unknown                                                                              | 21.68    | 1 |
| gb 18.2A08 Transformed tobacco Lambda Zap II library Nicotiana tabacum cDNA 5'       | 87.55    | 1 |
| gb AM789373 seedling library, SL Nicotiana tabacum cDNA clone nt002266080, mF        | 21.02    | 1 |
| Unknown                                                                              | 31.66    | 1 |
| gb Nicotiana tabacum NtJAZ2 mRNA for jasmonate ZIM-domain protein 2, complet         | 649.27   | 1 |
| tc Rep: Chromosome chr4 scaffold_373, whole genome shotgun sequence - Vitis vi       | 79.85    | 1 |
| tc Rep: Zinc finger, ZZ-type; Zinc finger, C2H2-type - Medicago truncatula (Barrel m | 23.76    | 1 |
| gb KF8C.101B23F.051214T7 KF8 Nicotiana tabacum cDNA clone KF8C.101B23, mRN           | 64.18    | 1 |
| Unknown                                                                              | 107.73   | 1 |
| Unknown                                                                              | 50.7     | 1 |
| tc Rep: V226 - Cowpox virus (CPV), partial (5%) [TC71551]                            | 38.45    | 1 |
| Unknown                                                                              | 619.4    | 1 |
| gb KR3B.101A06F.051107T7 KR3B Nicotiana tabacum cDNA clone KR3B.101A06, m            | 420.48   | 1 |
| gb TT-47_C04 K326 late senescent leaf library Nicotiana tabacum cDNA, mRNA seq       | 911.92   | 1 |
| tc Rep: Chromosome chr1 scaffold_5, whole genome shotgun sequence - Vitis vinif      | 37.77    | 1 |
| tc Rep: Chromosome chr17 scaffold_12, whole genome shotgun sequence - Vitis vi       | 150.6    | 1 |
| gb EST_CSP001xe20f1.ab1 EST_CSP Nicotiana tabacum cDNA, mRNA sequence [EH            | 4356.9   | 1 |
| Unknown                                                                              | 21.75    | 1 |
| Unknown                                                                              | 40.76    | 1 |
| Unknown                                                                              | 20.41    | 1 |
| tc Rep: 60S ribosomal protein L7A-like protein - Solanum tuberosum (Potato), com     | 185.69   | 1 |
| gb BP135562 MAT001 Nicotiana tabacum cDNA clone BY8090, mRNA sequence [BF            | 184.11   | 1 |
| tc Rep: Phosphate/phosphoenolpyruvate translocator-like protein - Arabidopsis th     | 13725.25 | 1 |
| tc Rep: Chromosome chr14 scaffold_27, whole genome shotgun sequence - Vitis vi       | 16656.85 | 1 |
| tc Rep: Chromosome chr2 scaffold_113, whole genome shotgun sequence - Vitis vi       | 1205.81  | 1 |
| Unknown                                                                              | 20.91    | 1 |
| tc Rep: Chromosome chr4 scaffold_6, whole genome shotgun sequence - Vitis vinif      | 103.48   | 1 |
| Unknown                                                                              | 692.76   | 1 |
| gb KR2B.108M21F.051229T7 KR2B Nicotiana tabacum cDNA clone KR2B.108M21, r            | 72.13    | 1 |
| gb KT7B.103K21F.060124T7 KT7 Nicotiana tabacum cDNA clone KT7B.103K21, mRN           | 19.67    | 1 |
| Unknown                                                                              | 109.08   | 1 |
| gb KG9B.003C19F.050720T7 KG9B Nicotiana tabacum cDNA clone KG9B.003C19, r            | 36.25    | 1 |
| gb KN6B.101A17F.051230T7 KN6B Nicotiana tabacum cDNA clone KN6B.101A17, n            | 197.57   | 1 |

|                                                                               |        |   |
|-------------------------------------------------------------------------------|--------|---|
| Unknown                                                                       | 173.59 | 1 |
| gb TT-07_G15 tobacco leaf library Nicotiana tabacum cDNA, mRNA sequence [FG6: | 55.2   | 1 |
| gb KP1B.105P05F.060116T7 KP1B Nicotiana tabacum cDNA clone KP1B.105P05, mI    | 439.21 | 1 |
| gb AGN_RNC023xn19f1.ab1 AGN_RNC Nicotiana tabacum cDNA 5', mRNA sequenc       | 80.07  | 1 |
| gb KT7C.112O13F.051221T7 KT7 Nicotiana tabacum cDNA clone KT7C.112O13, mR     | 80.2   | 1 |

| Arabidopsis SIV enriched | Closest tobacco | Description                       | MPG       | PT4       | PT24   | Detection call |     |
|--------------------------|-----------------|-----------------------------------|-----------|-----------|--------|----------------|-----|
|                          |                 |                                   |           |           |        | MPG            | PT4 |
| AT3G12940                | BP134405        | Unknown                           | 86.48275  | 108.26305 | 82.66  | 1              | 1   |
| AT1G78070                | EB447894        | tc Rep: Chromosome chr18 scaf     | 85.835    | 109.2045  | 347.32 | 1              | 1   |
| AT5G23090                | EB425683        | gb KF8C.103P24F.051214T7 KF8      | 620.859   | 362.908   | 500.22 | 1              | 1   |
| AT5G41150                | EB681945        | tc Rep: Ultraviolet hypersensitiv | 4.97      | 1.8       | 41.06  | 0              | 0   |
| AT5G61640                | DV160066        | gb KP1B.102C22F.050722T7 KP:      | 203.917   | 153.4315  | 62.37  | 1              | 1   |
| AT2G17900                | EB446556        | Unknown                           | 86.48275  | 108.26305 | 82.66  | 1              | 1   |
| AT1G07160                | EB683563        | Unknown                           | 86.48275  | 108.26305 | 82.66  | 1              | 1   |
| AT2G40650                | DW002772        | gb KR3B.103O02F.051108T7 KR       | 478.4005  | 459.129   | 456.17 | 1              | 1   |
| AT1G08680                | DW003203        | gb KR3B.105C01F.051109T7 KR:      | 445.294   | 336.26    | 522.39 | 1              | 1   |
| AT2G41070                | EB427718        | gb KF8C.110N19F.051216T7 KF8      | 146.24    | 113.2575  | 189.62 | 1              | 1   |
| AT1G03950                | FG642430        | gb TT-17_M23 K326 early senes     | 329.925   | 425.637   | 451.78 | 1              | 1   |
| AT3G19510                | DV162276        | gb KP1B.110K05F.050727T7 KP:      | 14.703335 | 19.24275  | 41.16  | 0              | 0   |
| AT5G40440                | D31964          | gb Nicotiana tabacum mRNA fo      | 813.125   | 299.9965  | 74.86  | 1              | 1   |
| AT1G09810                | EB427609        | Unknown                           | 86.48275  | 108.26305 | 82.66  | 1              | 1   |
| AT1G76270                | DV160855        | gb KP1B.104G11F.050725T7 KP       | 161.4811  | 308.5635  | 995.65 | 1              | 1   |
| AT3G45740                | DV161891        | gb KP1B.109H22F.050727T7 KP       | 62.53875  | 70.9167   | 66.75  | 1              | 1   |
| AT5G17370                | DV160207        | gb KP1B.102J11F.050722T7 KP1      | 21.79     | 22.5662   | 79.02  | 0              | 0   |

SIV-enriched Arabidopsis genes (Qin et al., 2009) with the closest identified *Nicotiana tabacum* homologs.

### Supplementary Table S2.

SIV-enriched Arabidopsis genes<sup>8</sup> with the closest identified *Nicotiana tabacum* homologs.

---

**PT24**

1

1

1

1

1

1

1

1

1

1

1

1

1

1

1

1

1

---
